# Supplementary material
Source: PubMed Central journal article supplement (PMC3817102)

Raw file: 20111212\_EXQ5\_AnMi\_QC\_HCMVp1\_1  
Scan number: 27670  
Protein: ORFS334W + NC\_006273.2[204331,204558]+ <unknown description>  
Peptide score: 84.72  
Method: FTMS; HCD

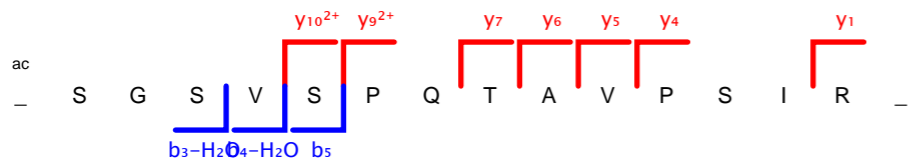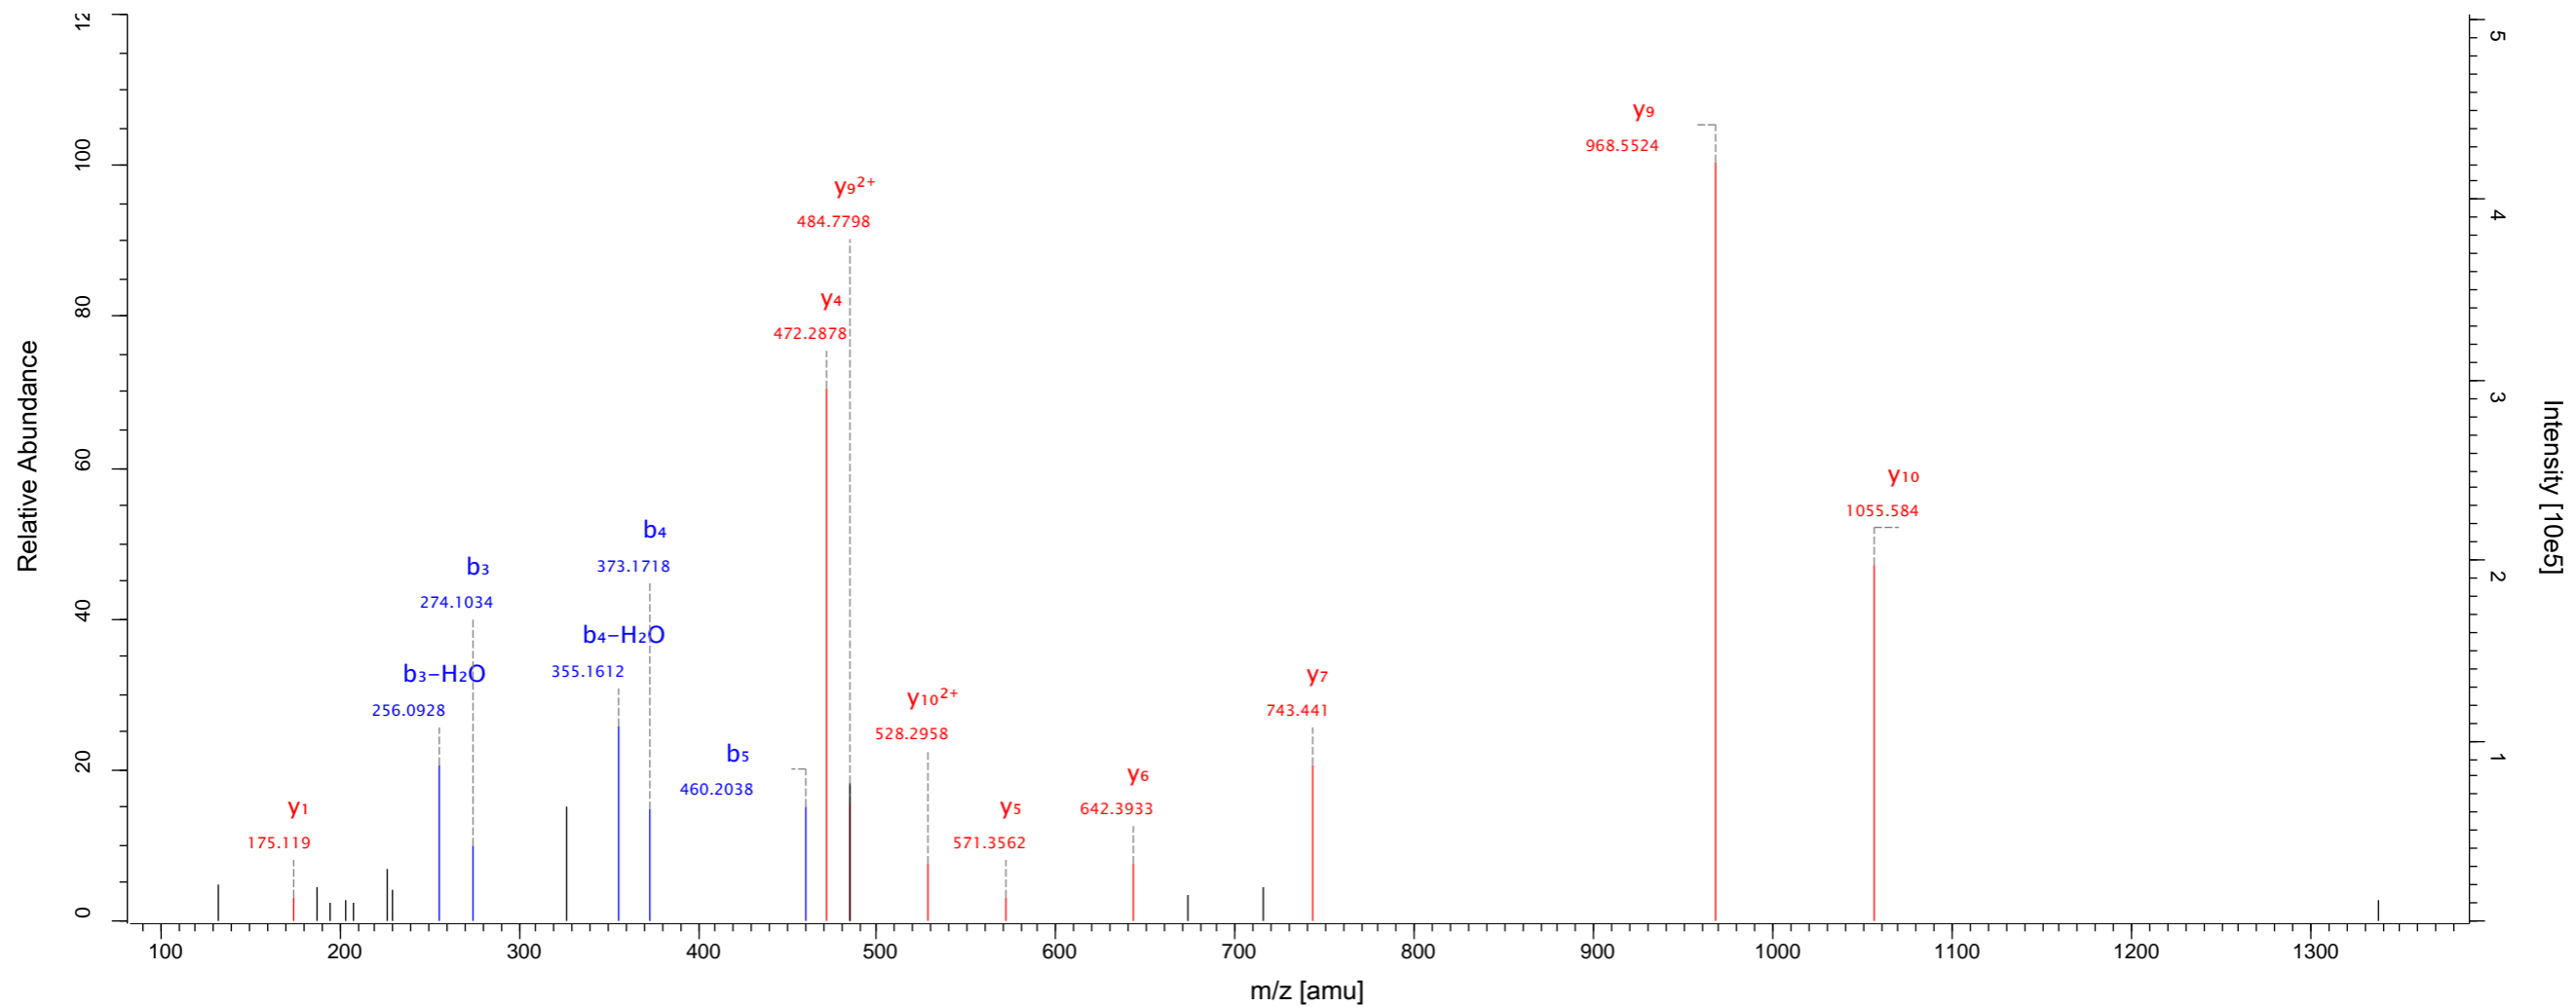

Raw file: 20111212\_EXQ5\_AnMi\_QC\_HCMVp1\_10  
Scan number: 10249  
Protein: ORFL18W + NC\_006273.2[8020,8253]+ <unknown description>  
Peptide score: 89.05  
Method: FTMS; HCD

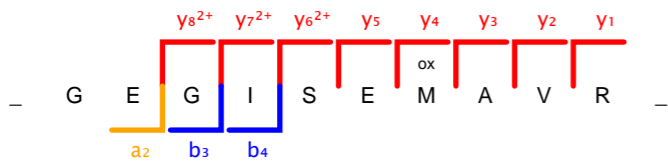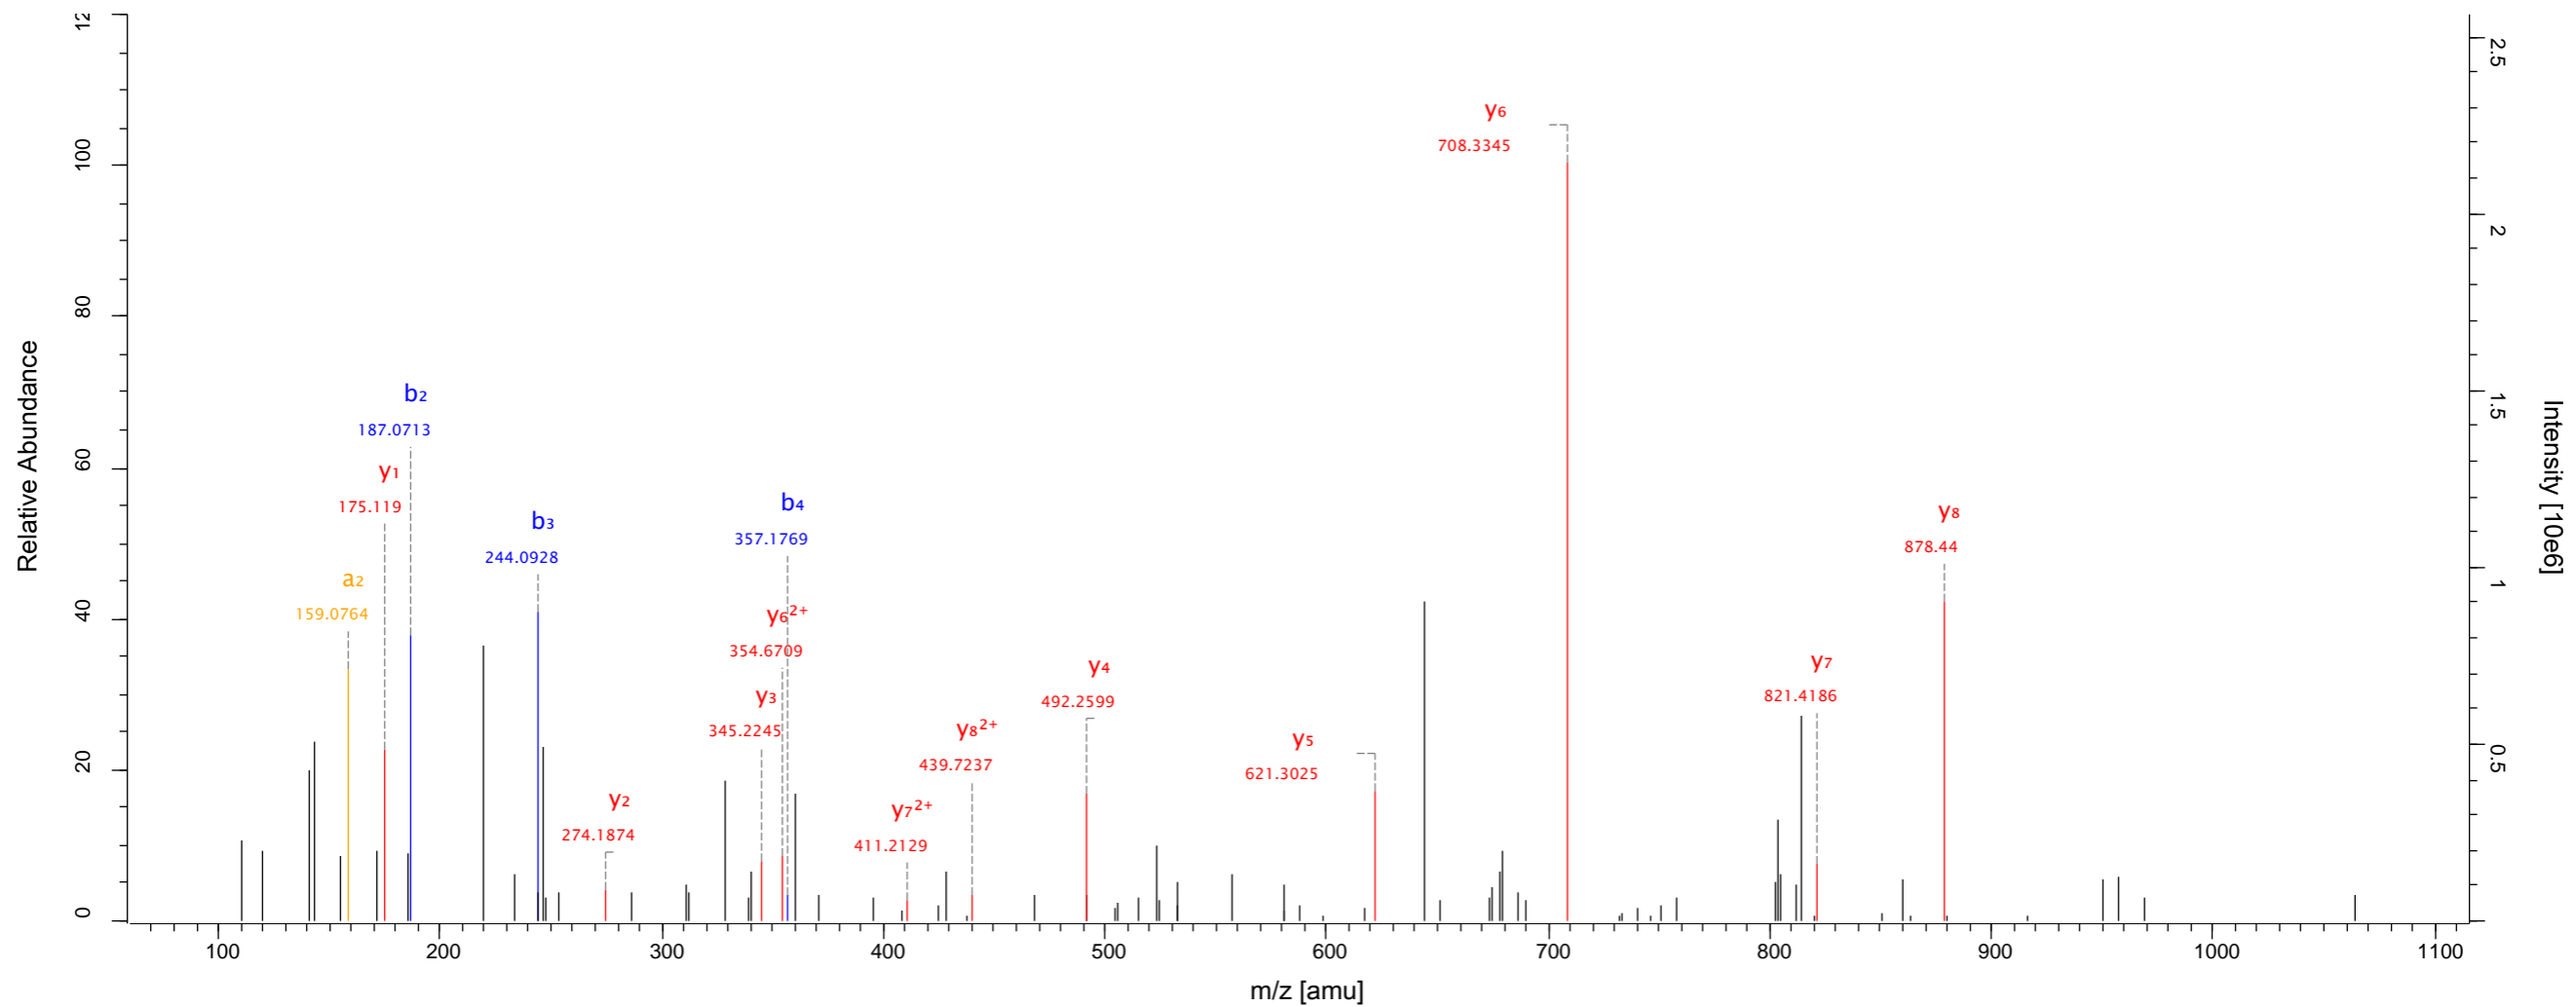

Raw file: 20111212\_EXQ5\_AnMi\_QC\_HCMVp1\_10  
Scan number: 10712  
Protein: ORFL271C.iORF1 - NC\_006273.2[176607,176858]- <unknown description>  
Peptide score: 155.1  
Method: FTMS; HCD

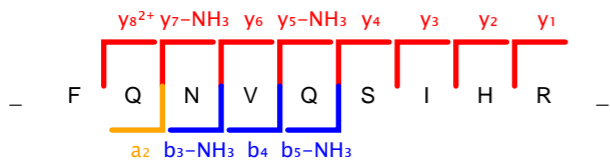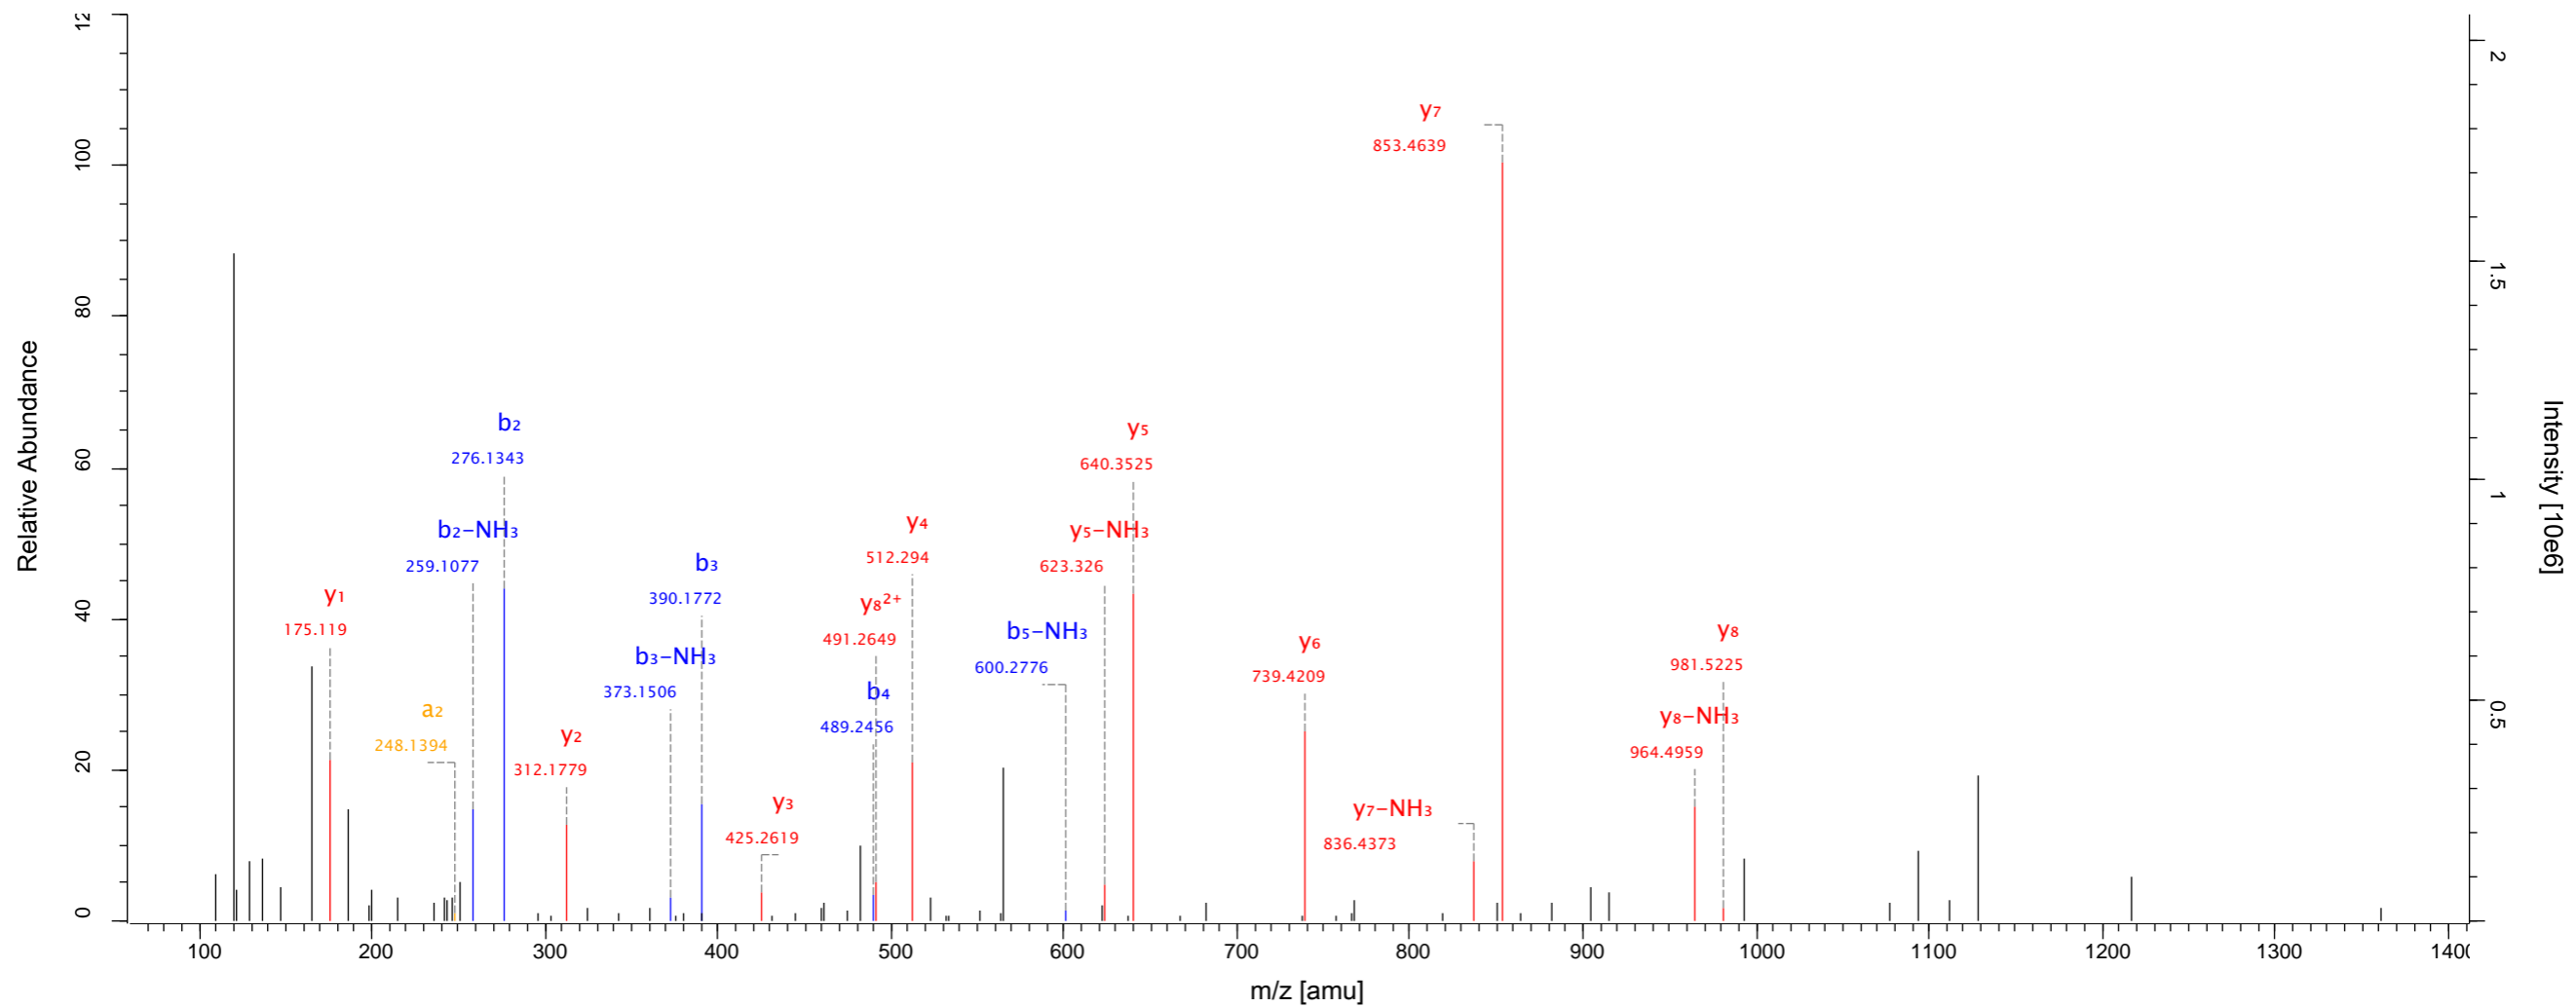

Raw file: 20111212\_EXQ5\_AnMi\_QC\_HCMVpl1\_10  
Scan number: 11413  
Protein: ORFL301C - NC\_006273.2[185358,185666]- <unknown description>  
Peptide score: 64.71  
Method: FTMS; HCD

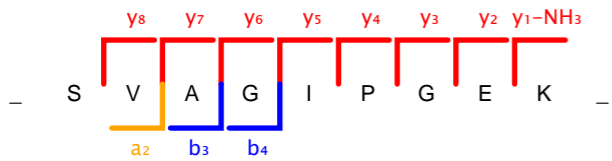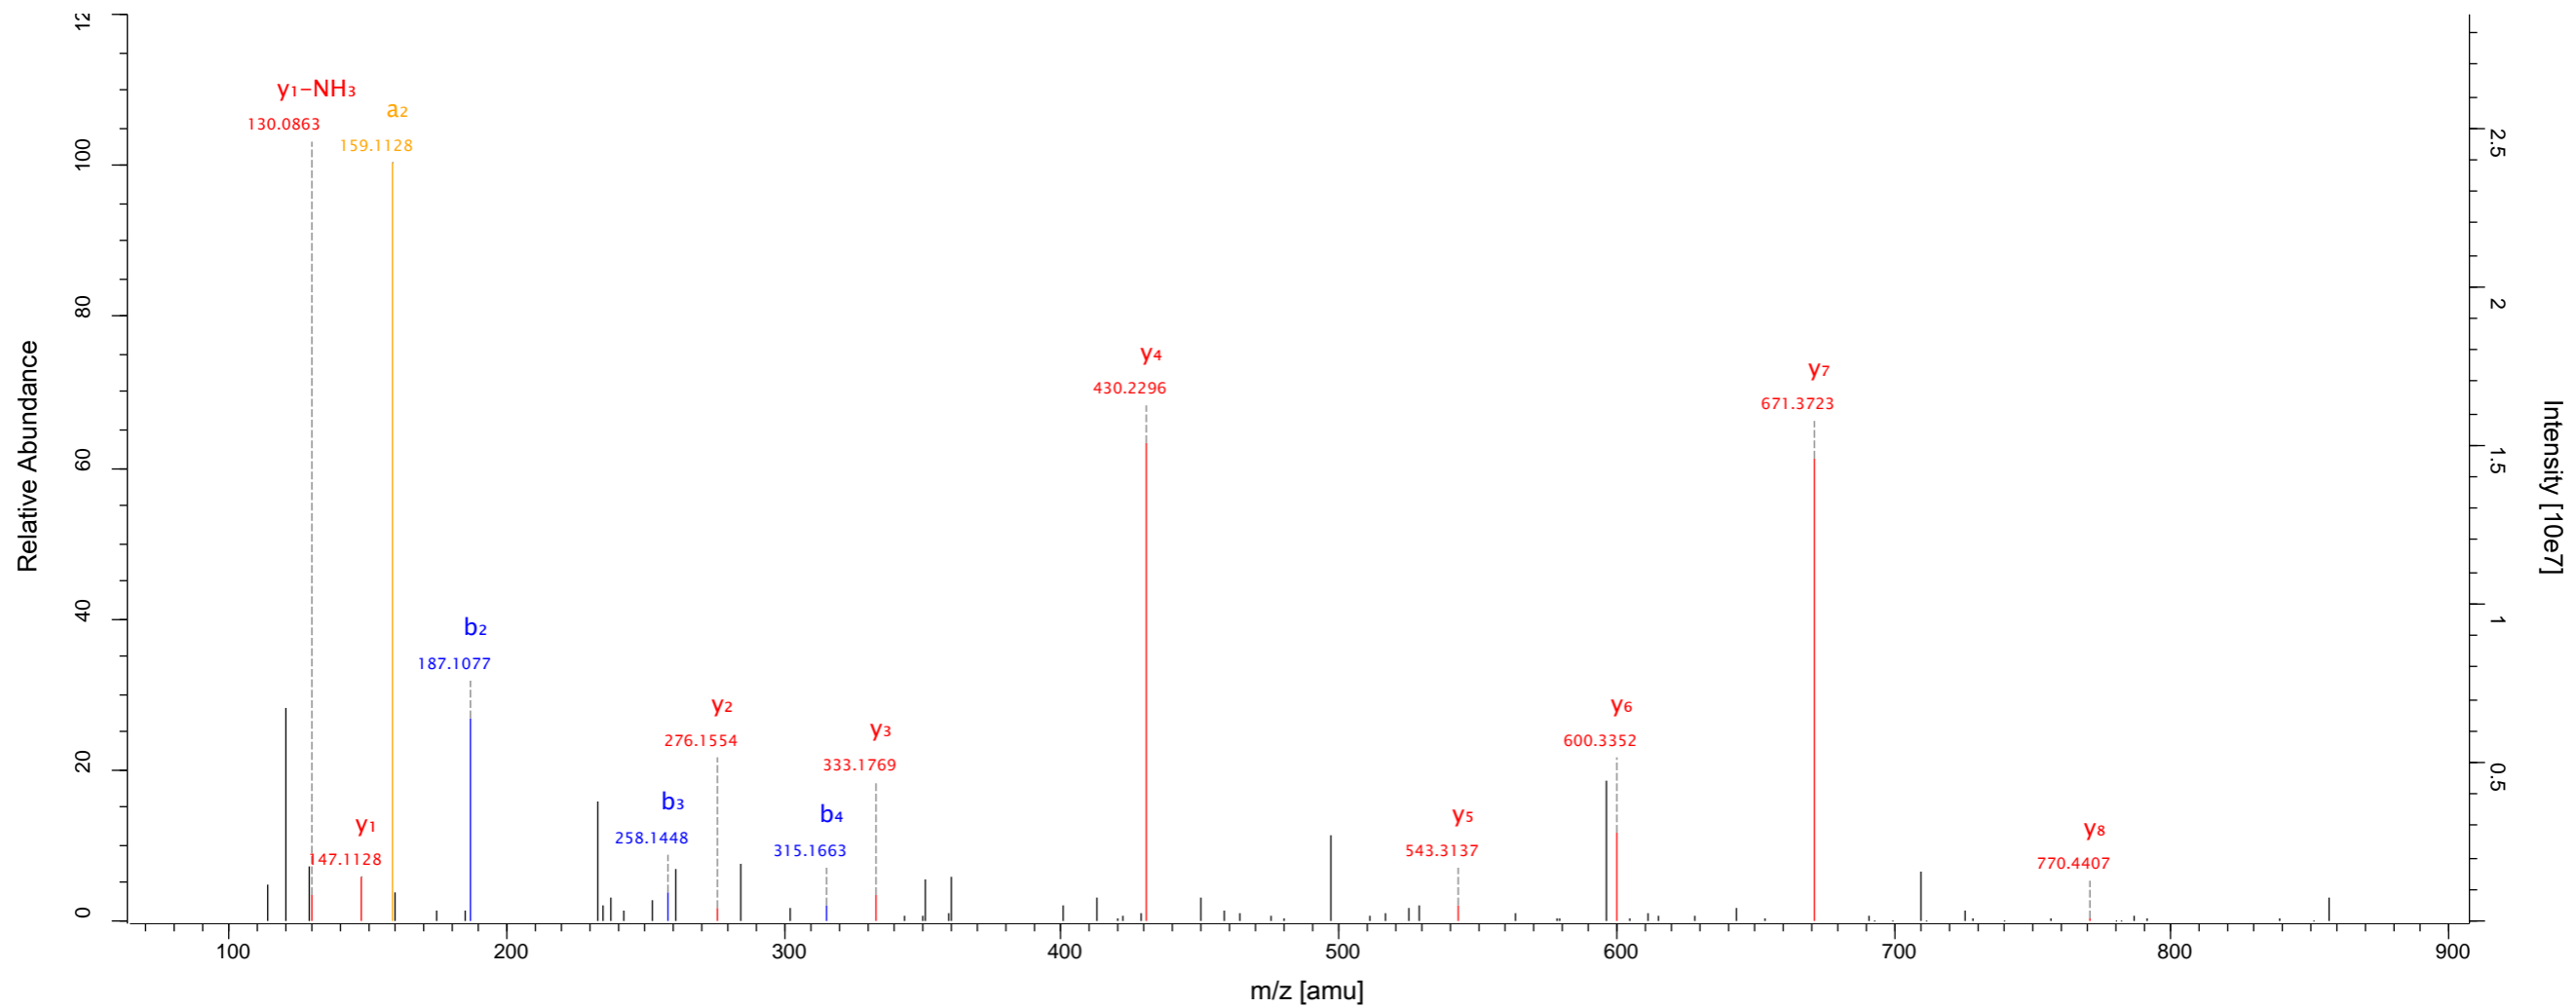

Raw file: 20111212\_EXQ5\_AnMi\_QC\_HCMVp1\_10  
Scan number: 11896  
Protein: ORFL27C - NC\_006273.2[7912,13003]- <unknown description>; ORFL27C.iORF1 - NC\_006273.2[7912,8184]- <unknown description>  
Peptide score: 93.56  
Method: FTMS; HCD

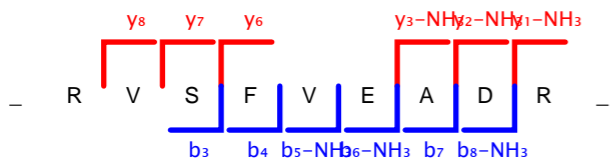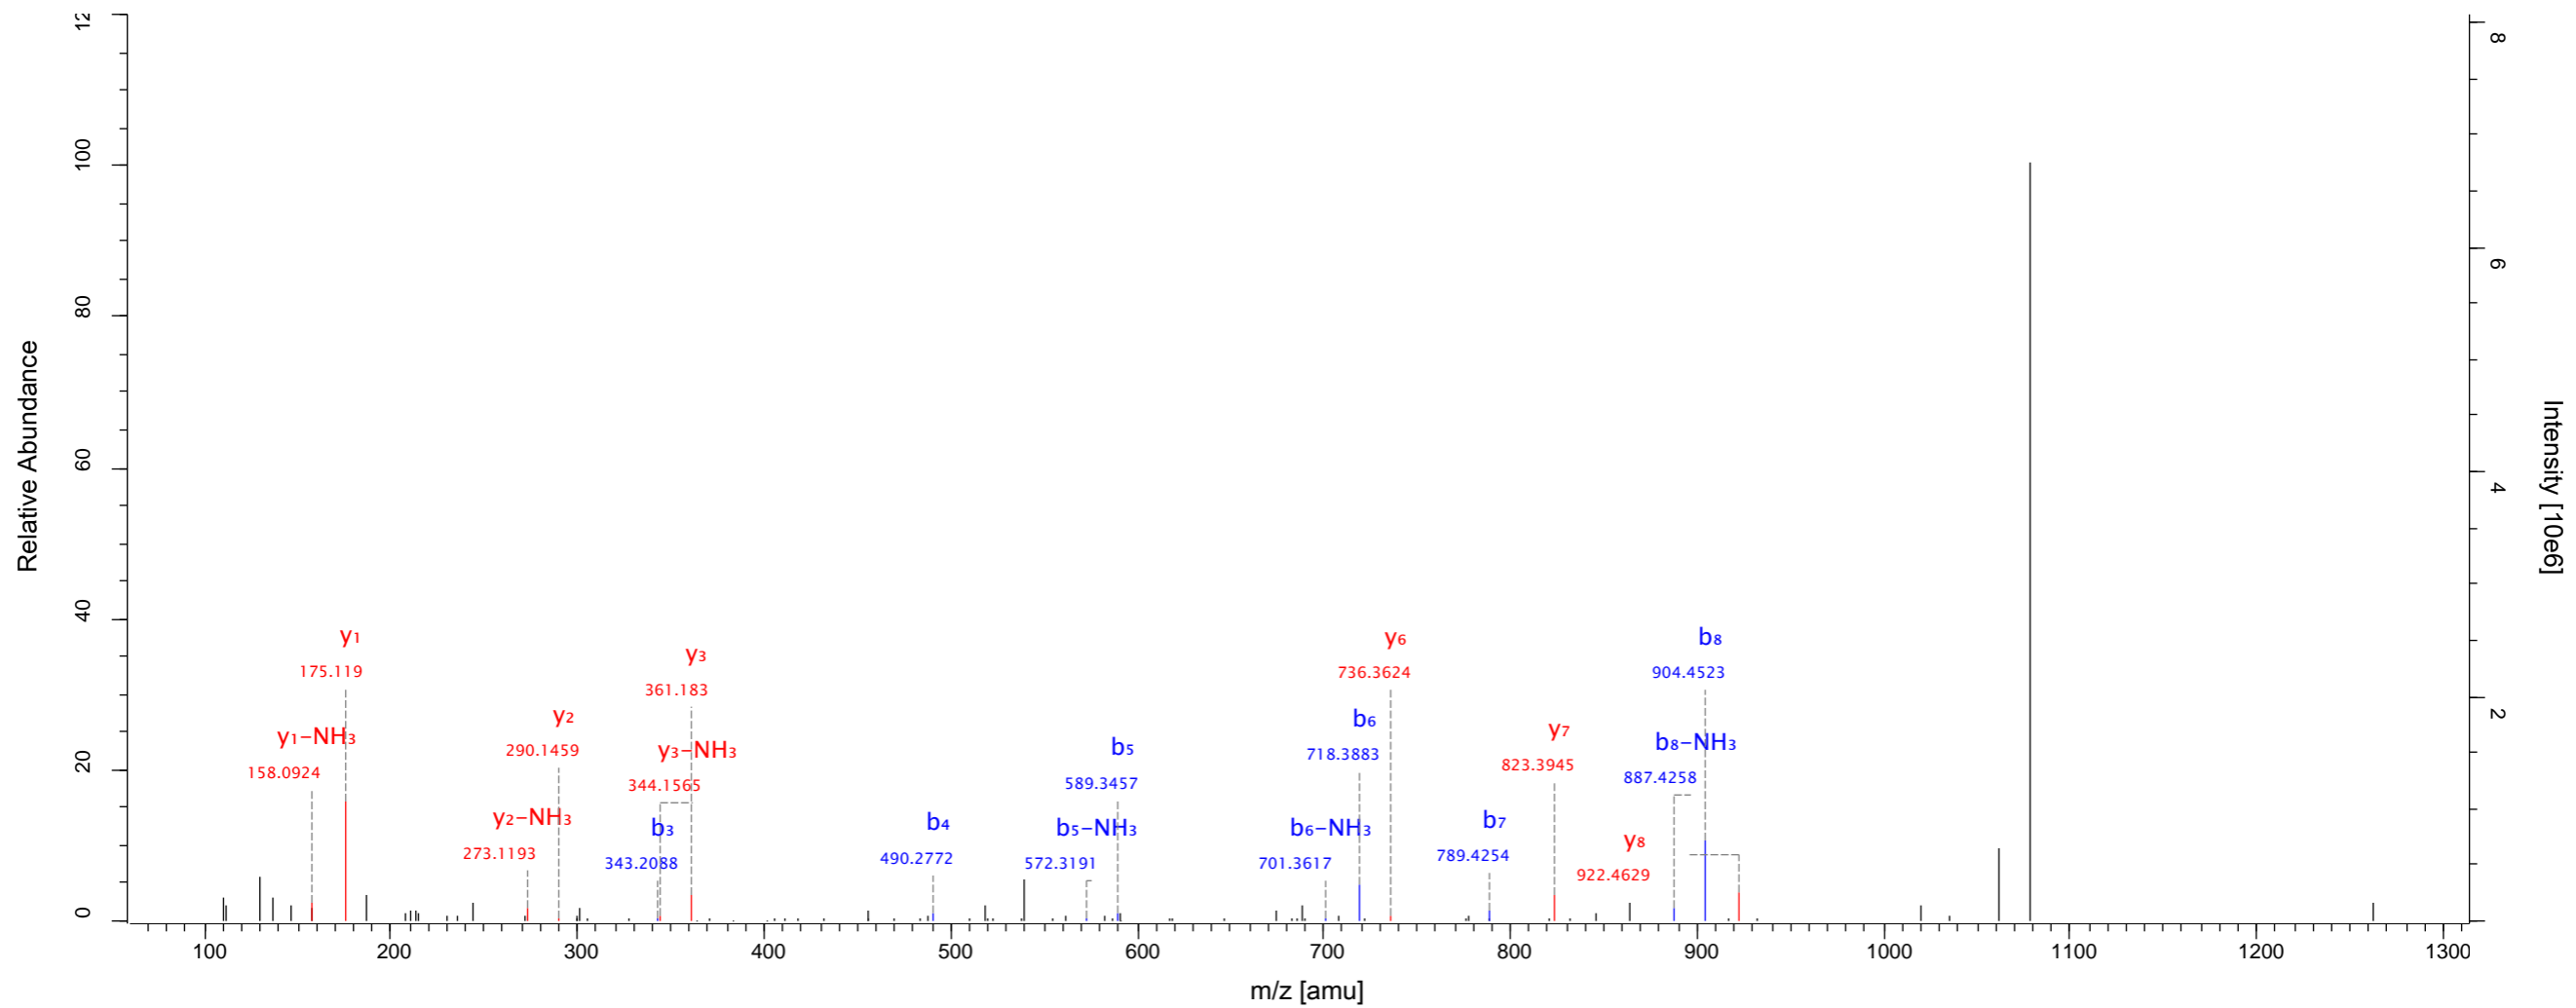

Raw file: 20111212\_EXQ5\_AnMi\_QC\_HCMVp11\_10  
Scan number: 13953  
Protein: ORFL223W + NC\_006273.2[139458,139730]+ <unknown description>  
Peptide score: 195.51  
Method: FTMS; HCD

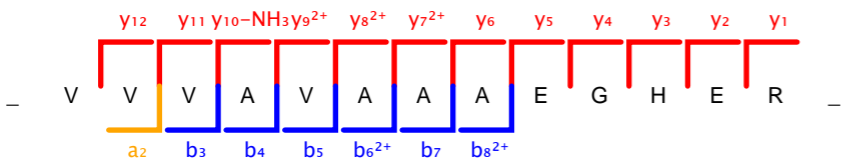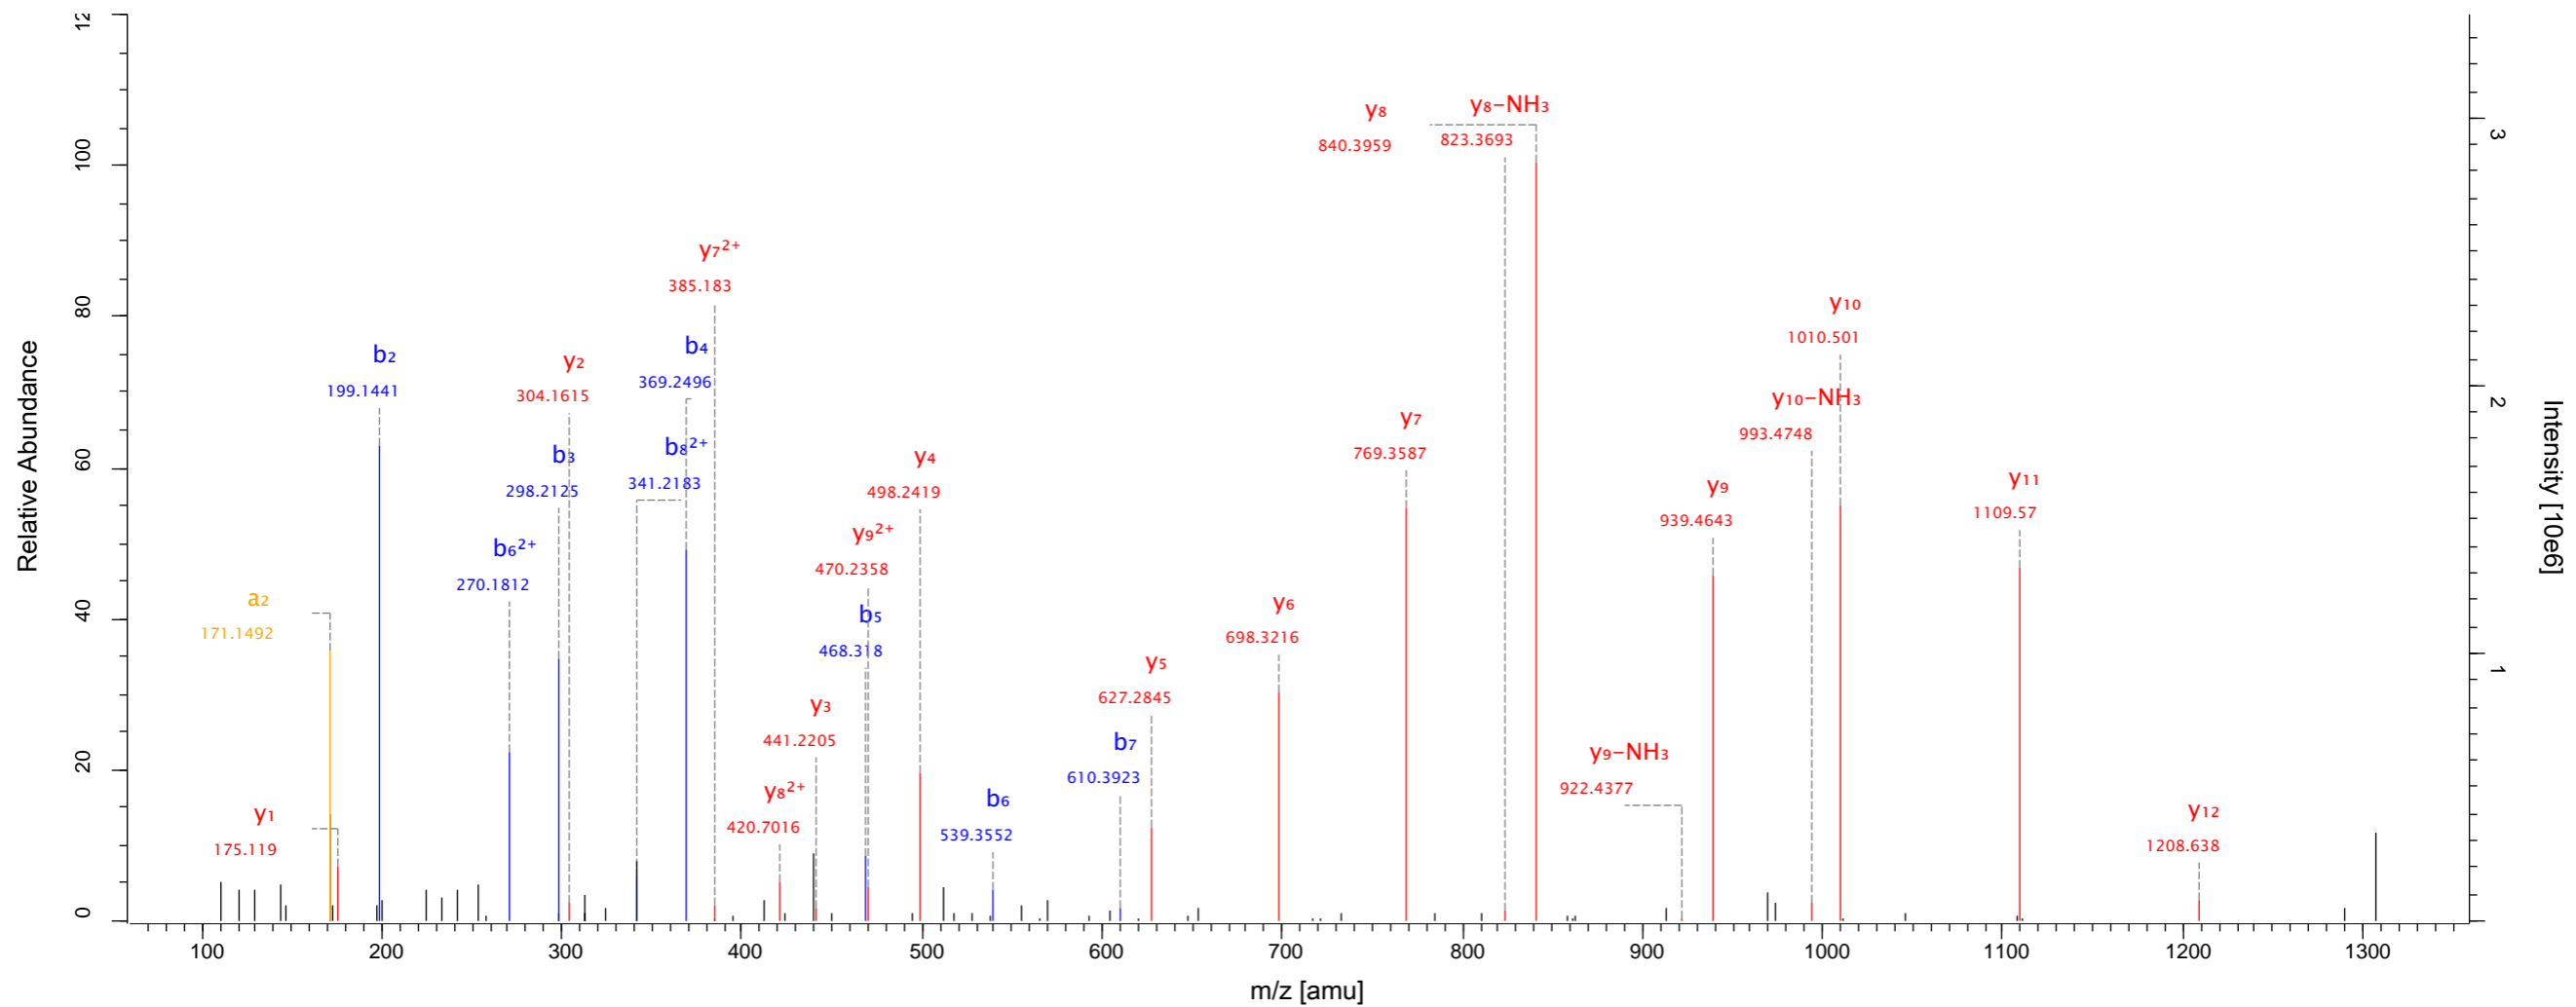

Raw file: 20111212\_EXQ5\_AnMi\_QC\_HCMVp11\_10  
Scan number: 14087  
Protein: ORFL106C - NC\_006273.2[53935,54294]- <unknown description>  
Peptide score: 156.93  
Method: FTMS; HCD

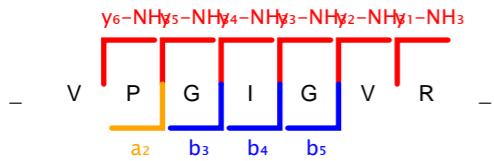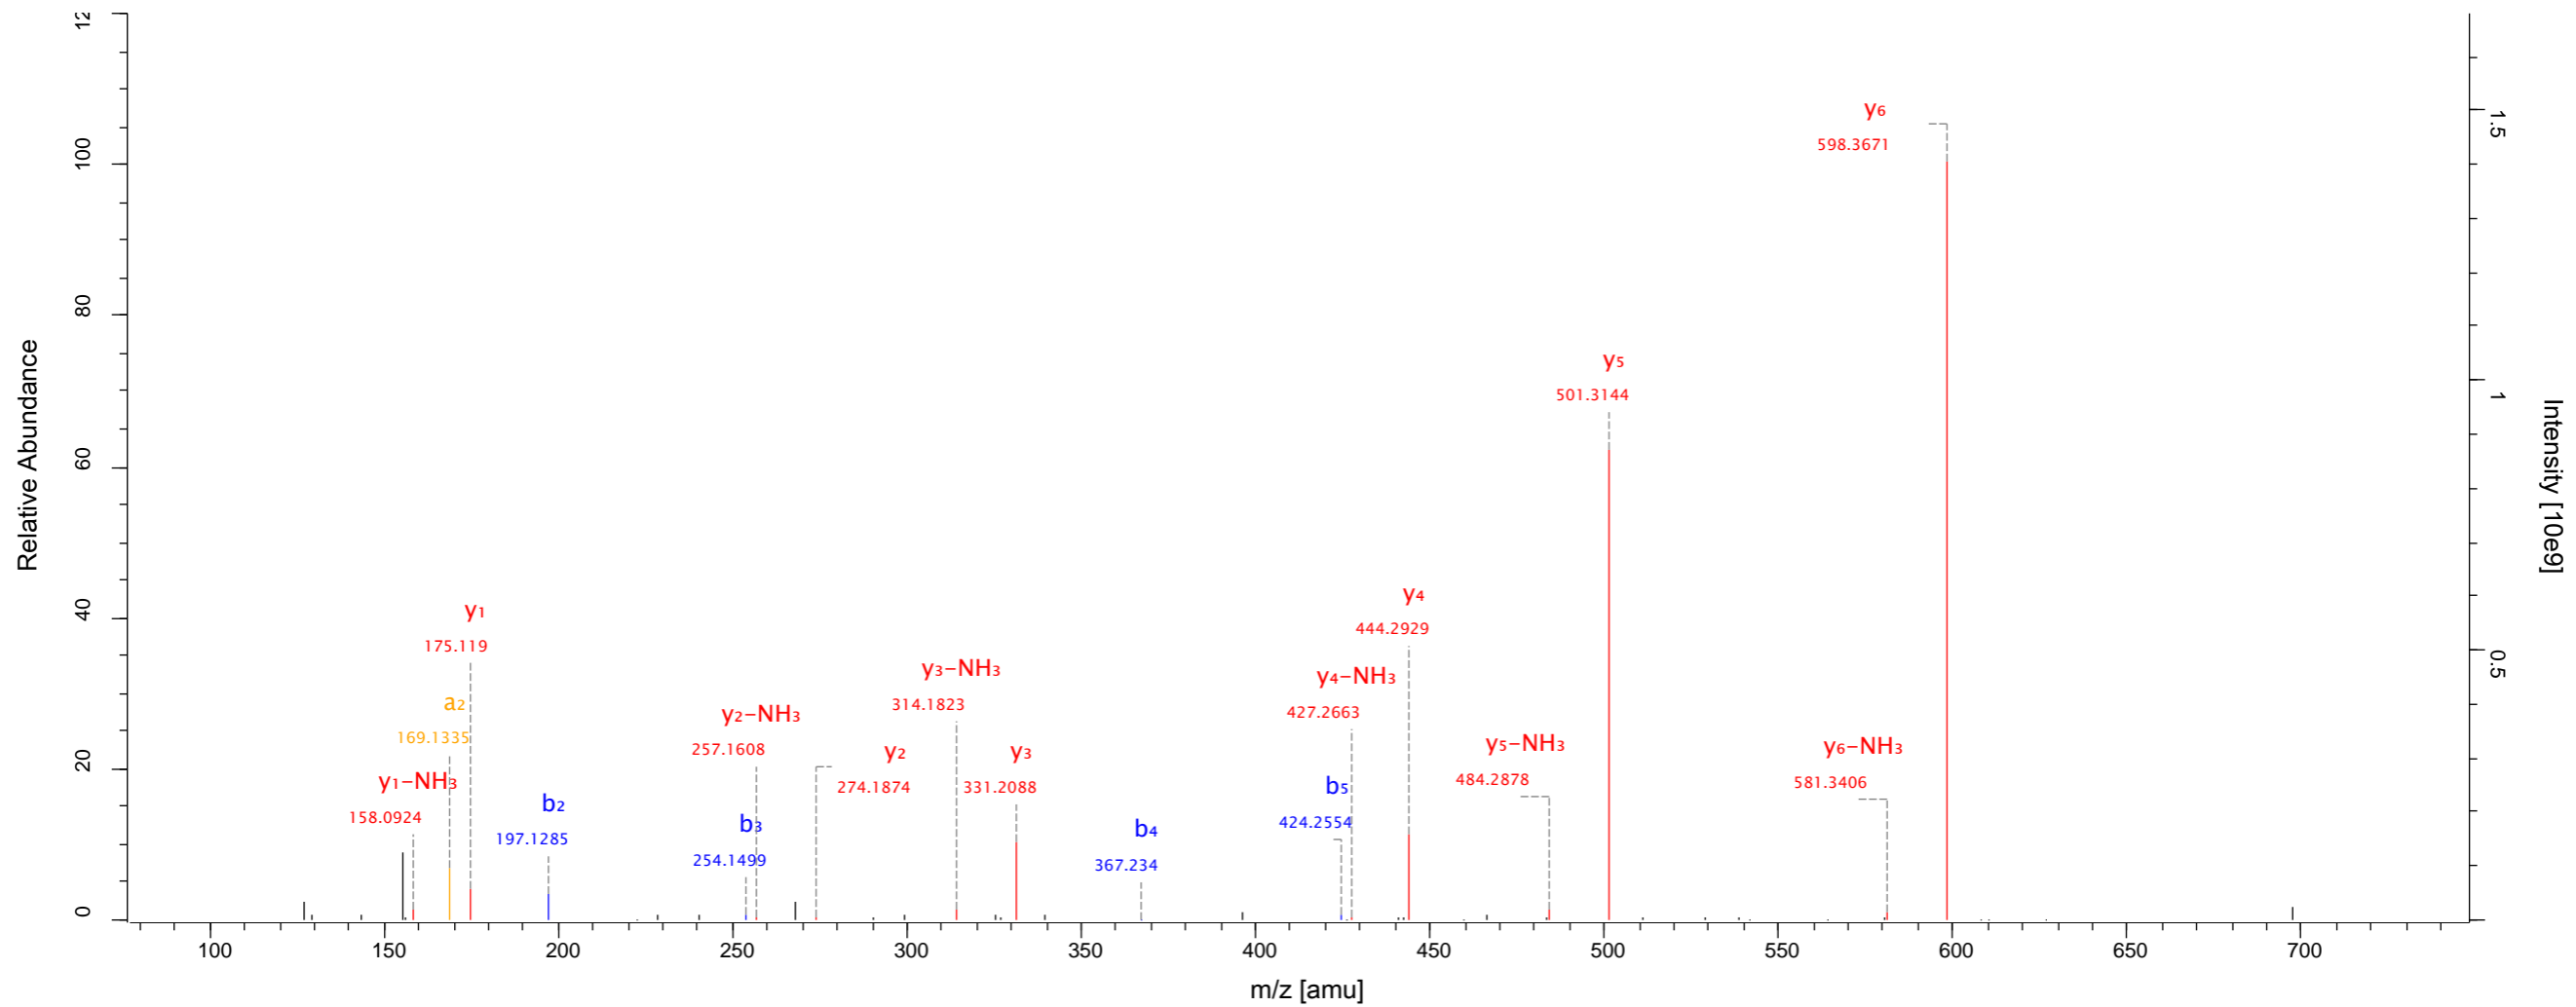

Raw file: 20111212\_EXQ5\_AnMi\_QC\_HCMVp11\_10  
Scan number: 14568  
Protein: ORFL174C.iORF2 - NC\_006273.2[106396,106770]- <unknown description>  
Peptide score: 66.62  
Method: FTMS; HCD

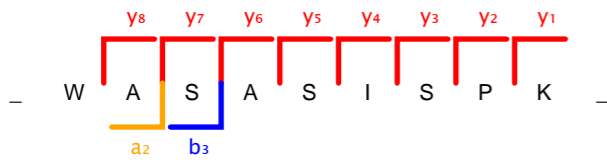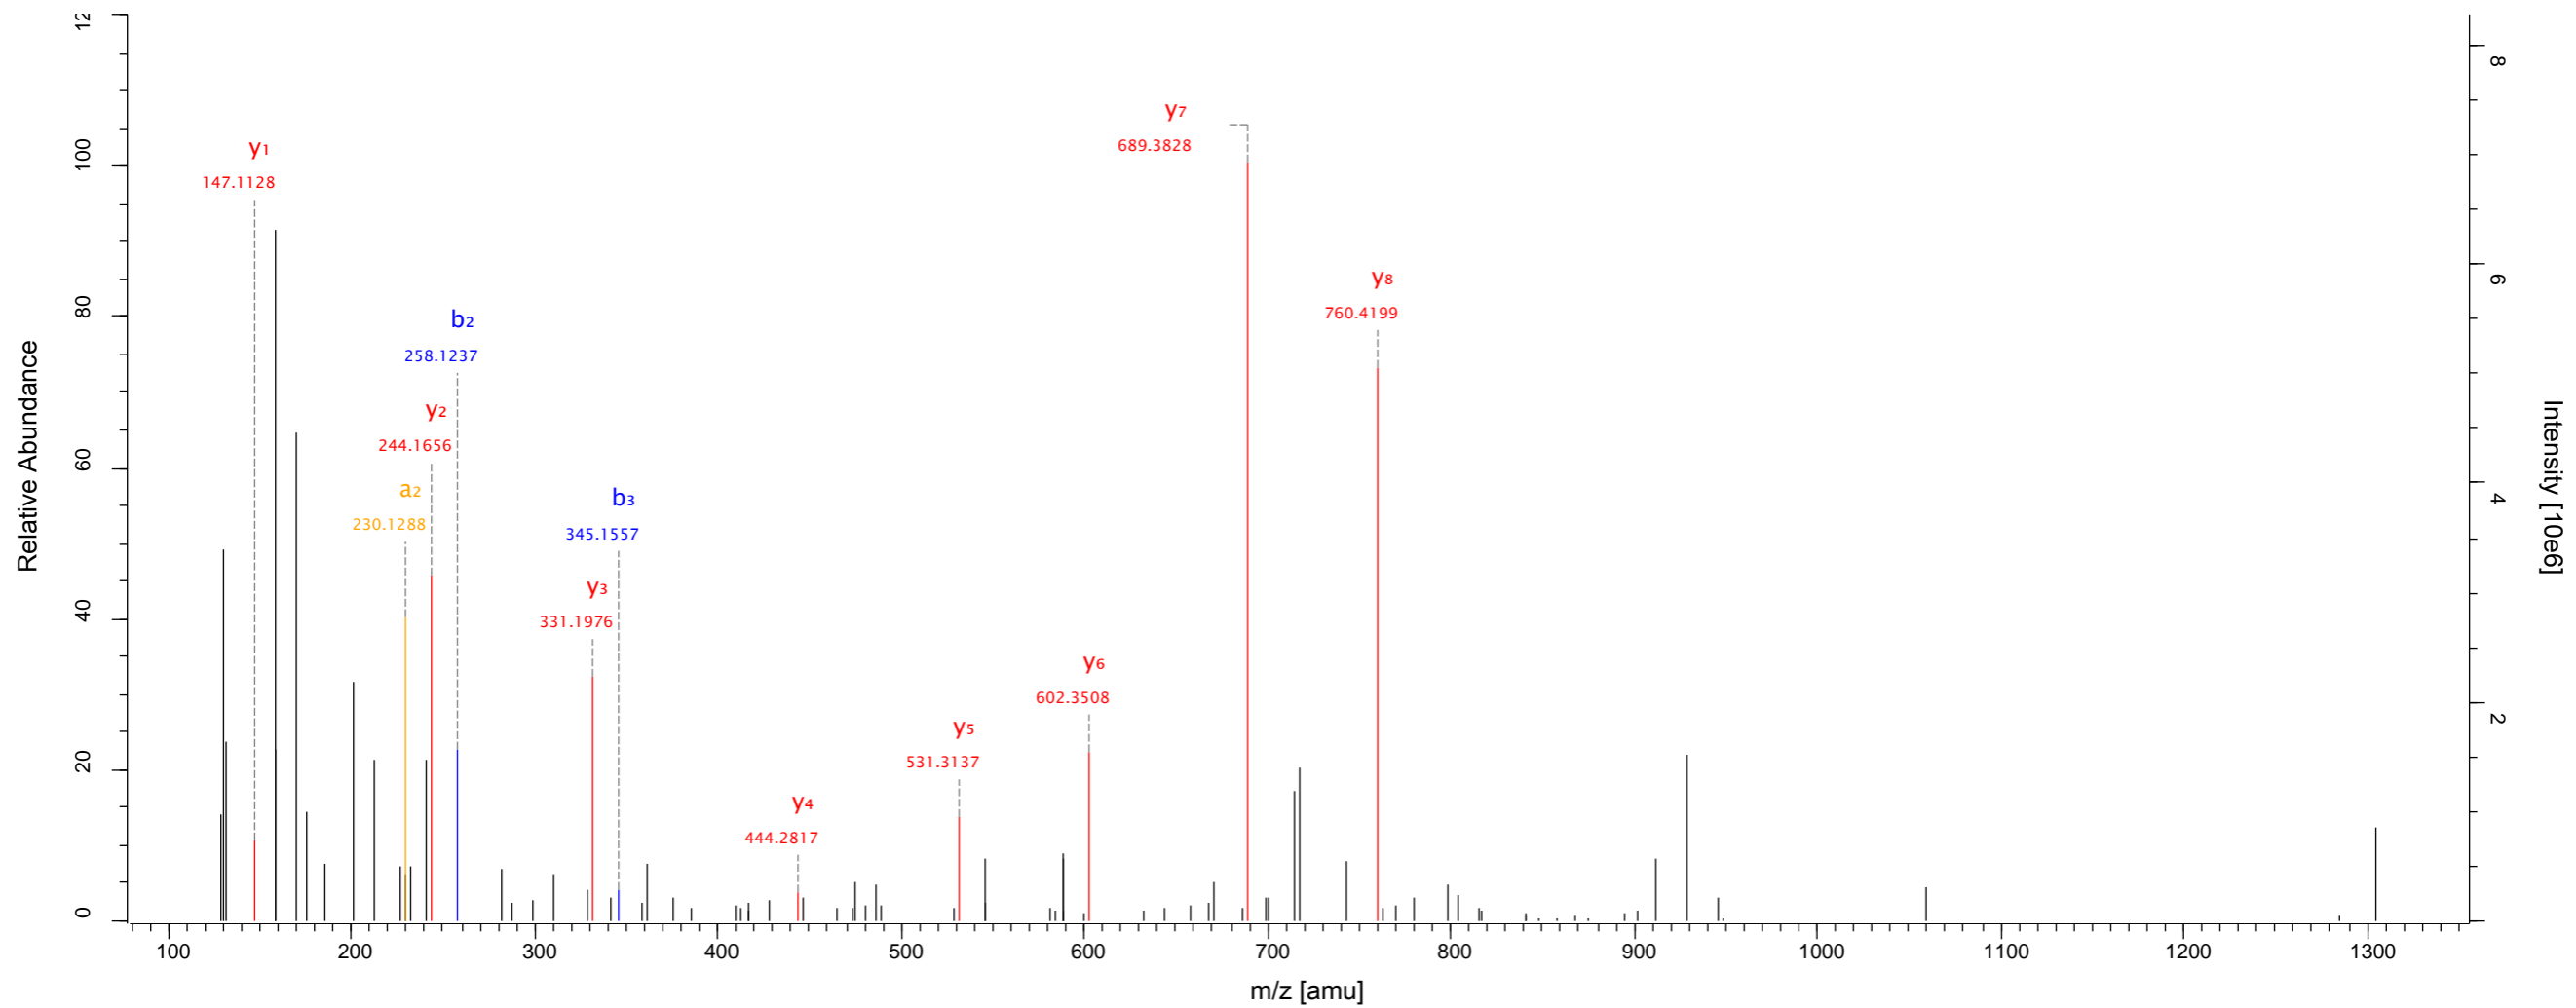



Raw file: 20111212\_EXQ5\_AnMi\_QC\_HCMVp11\_10  
Scan number: 14703  
Protein: ORFL88C - NC\_006273.2[37894,38133]- <unknown description>; rORF58 - NC\_006273.2[37894,37920]- <unknown description>  
Peptide score: 85.85  
Method: FTMS; HCD

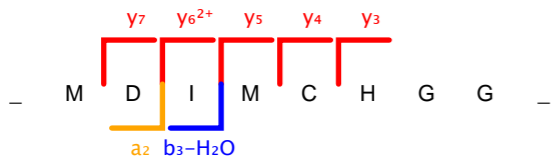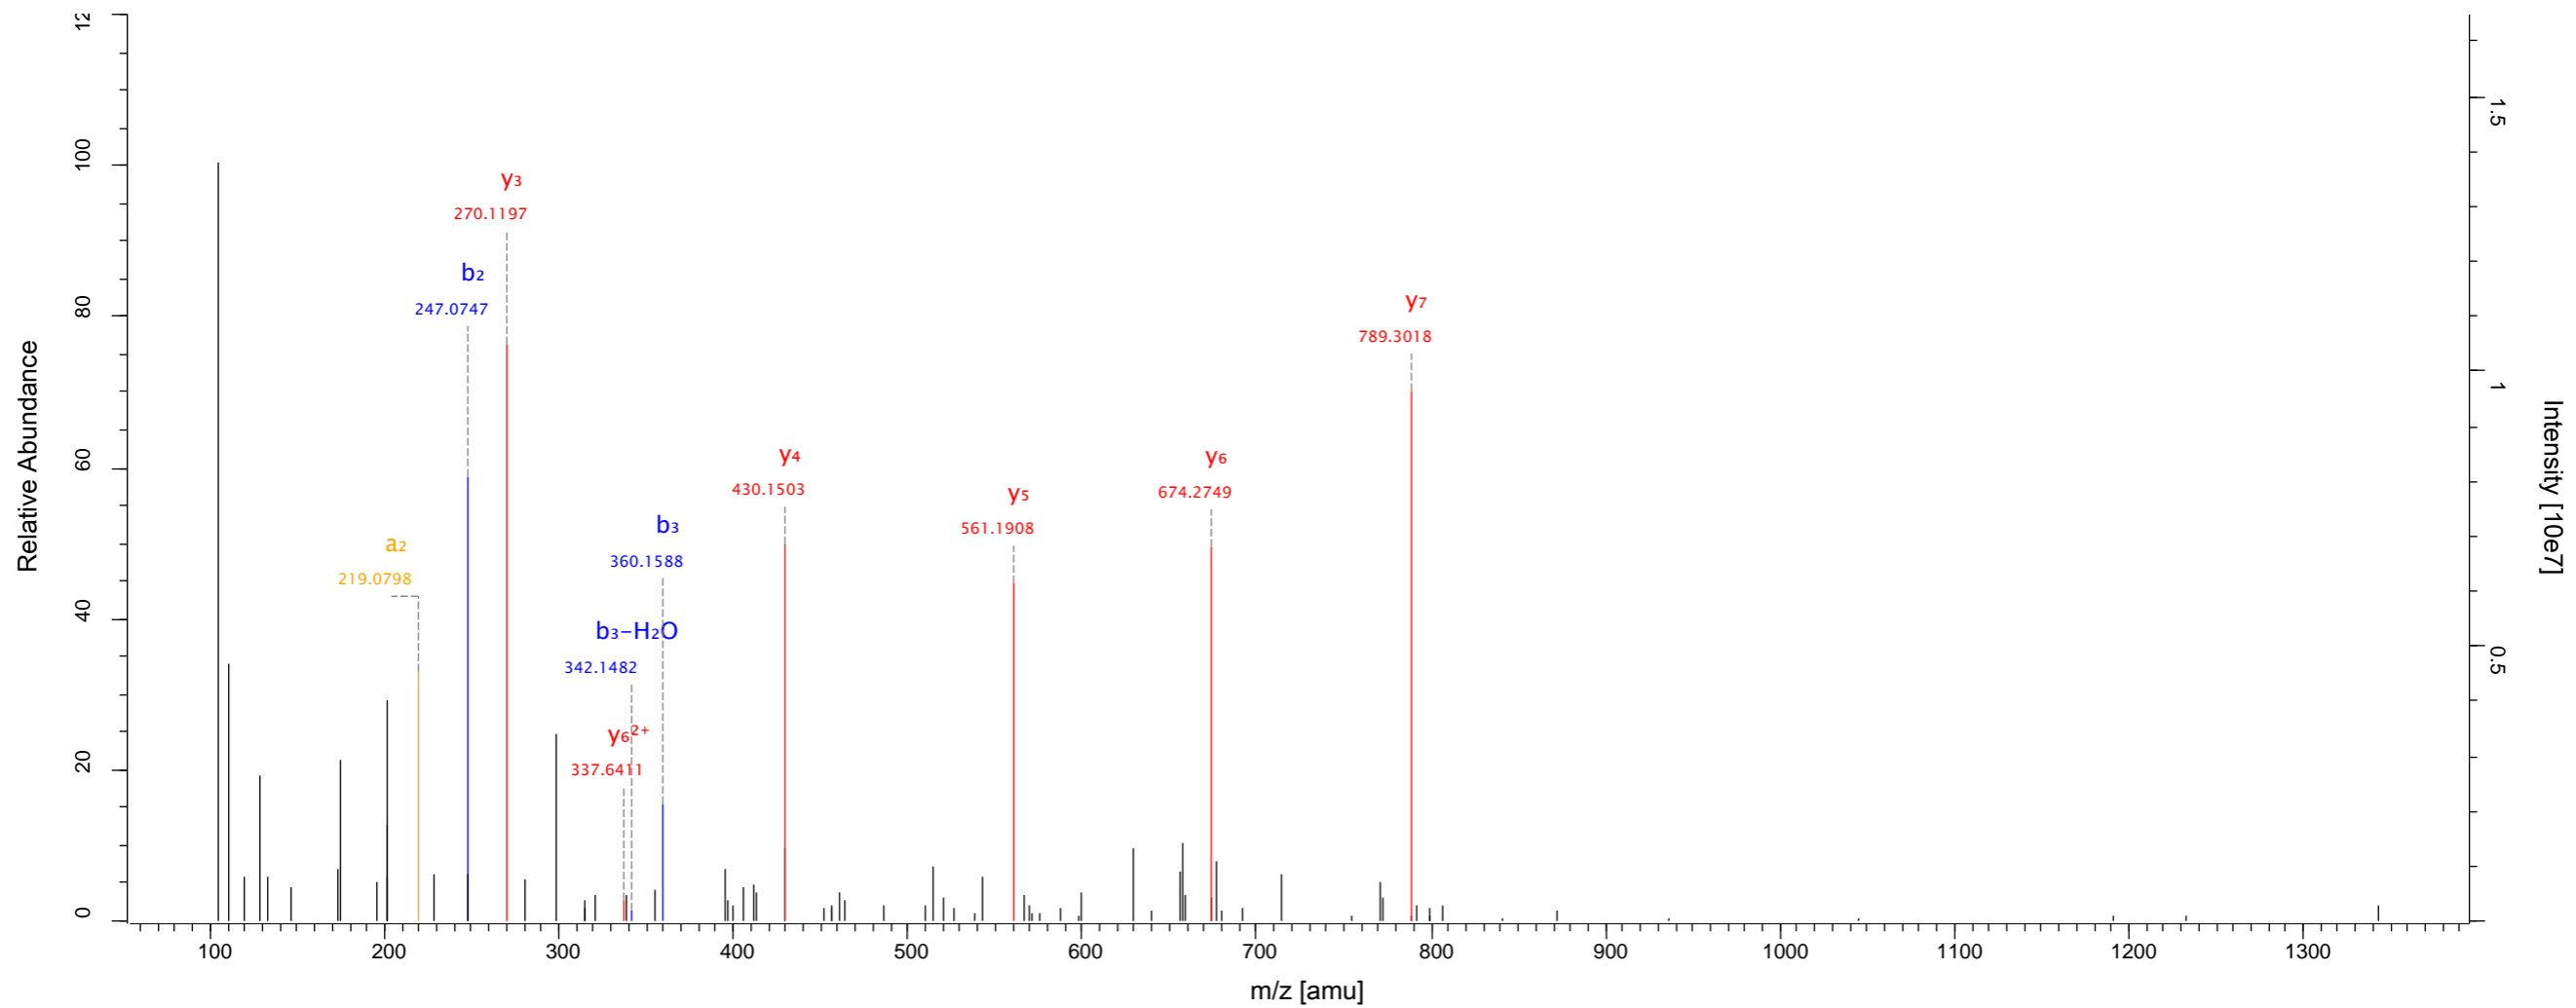

Raw file: 20111212\_EXQ5\_AnMi\_QC\_HCMVp1\_10  
Scan number: 15240  
Protein: ORFL159W + NC\_006273.2[101475,109052]+ <unknown description>; ORFL159W.iORF1 + NC\_006273.2[101526,109052]+ <unknown description>  
Peptide score: 101.64  
Method: FTMS; HCD

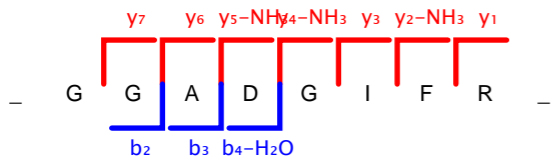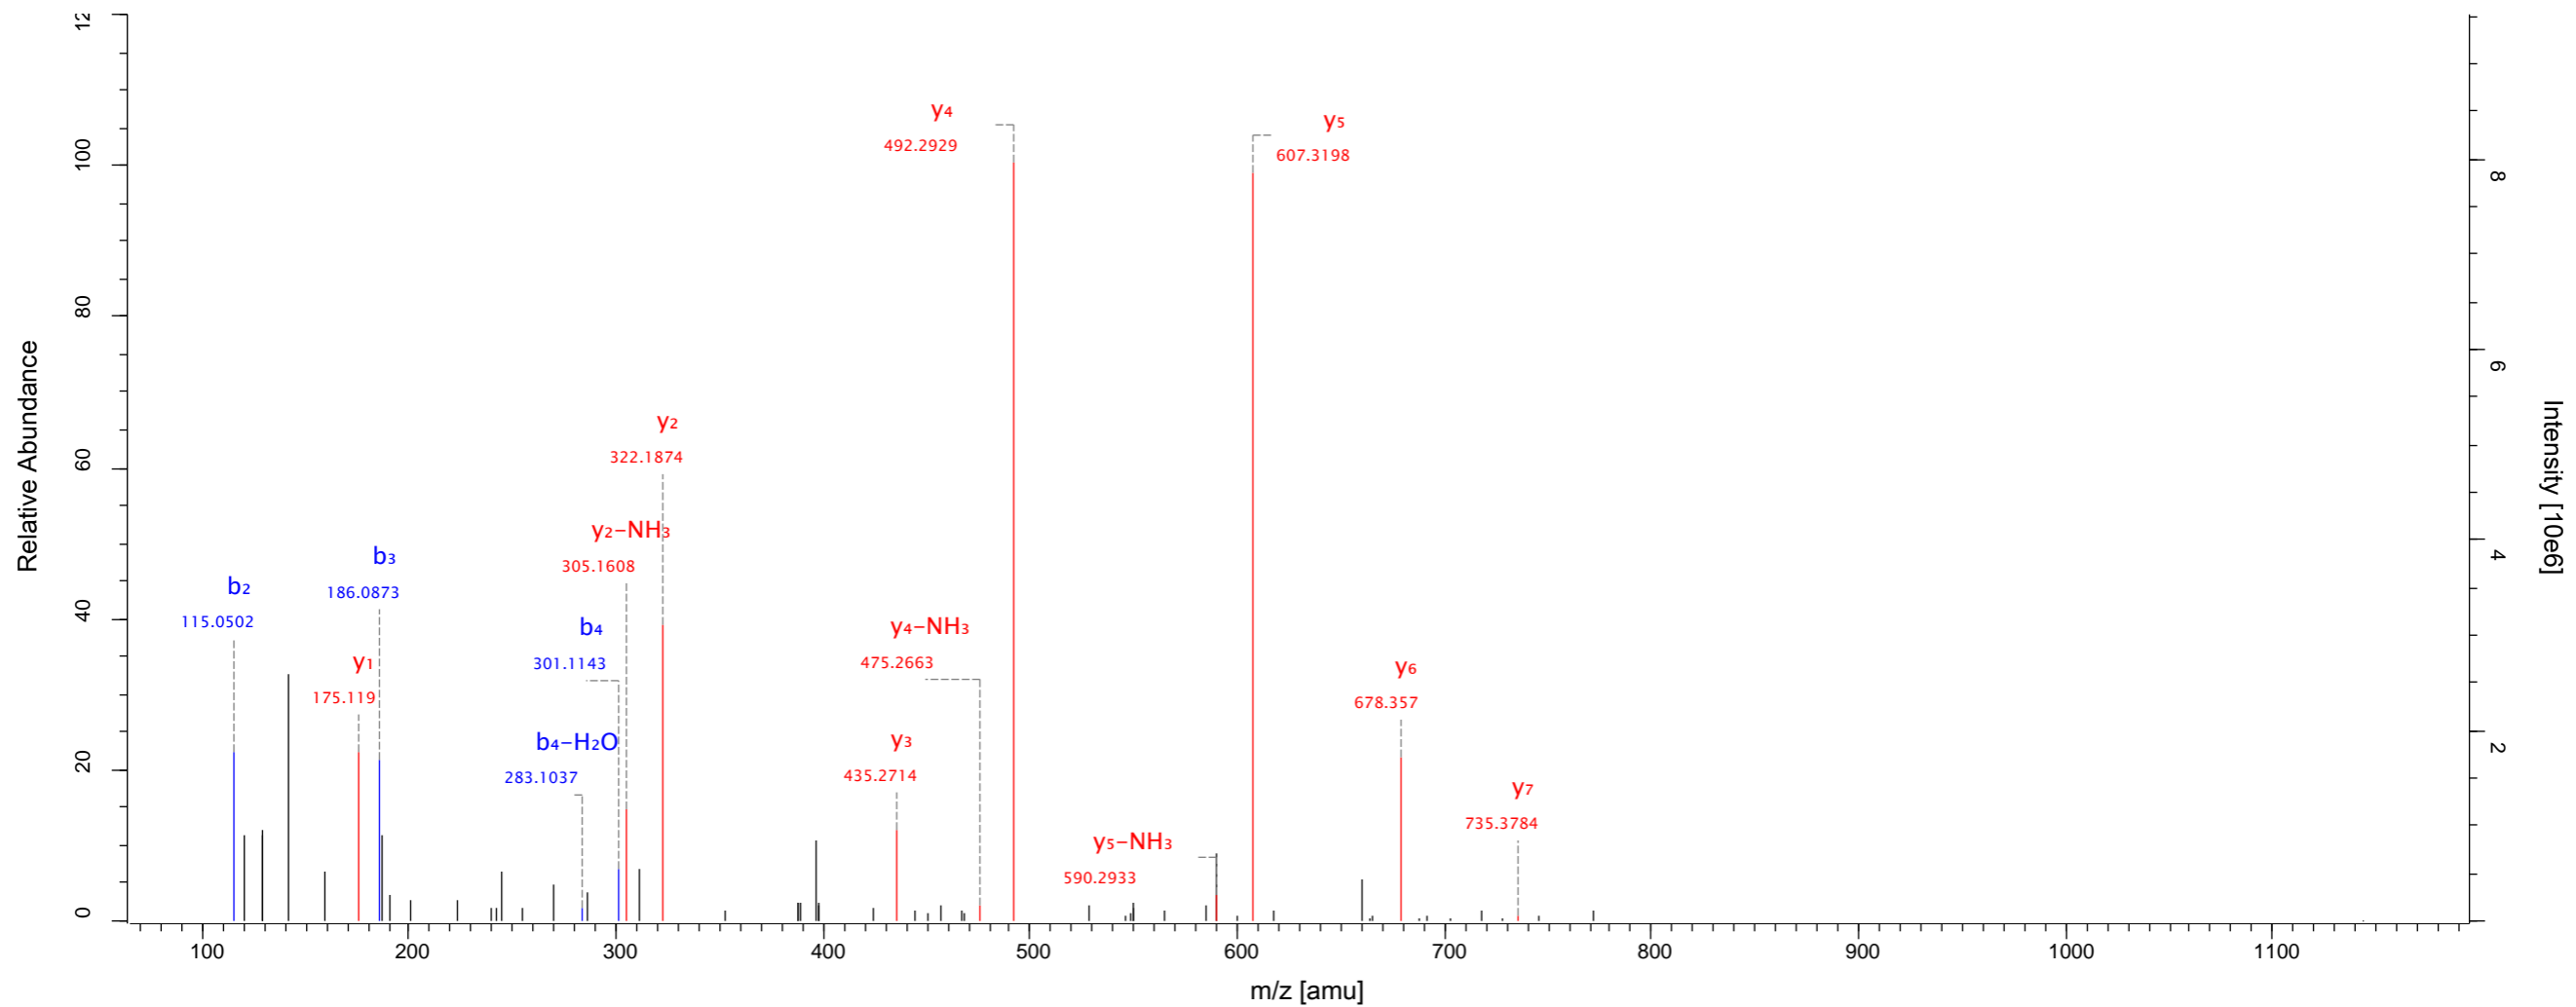

Raw file: 20111212\_EXQ5\_AnMi\_QC\_HCMVp11\_10  
Scan number: 15840  
Protein: ORFL19W + NC\_006273.2[8136,8387]+ <unknown description>  
Peptide score: 107.65  
Method: FTMS; HCD

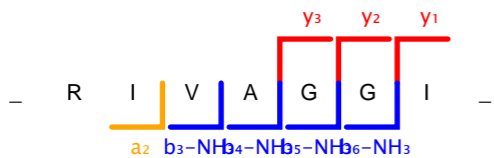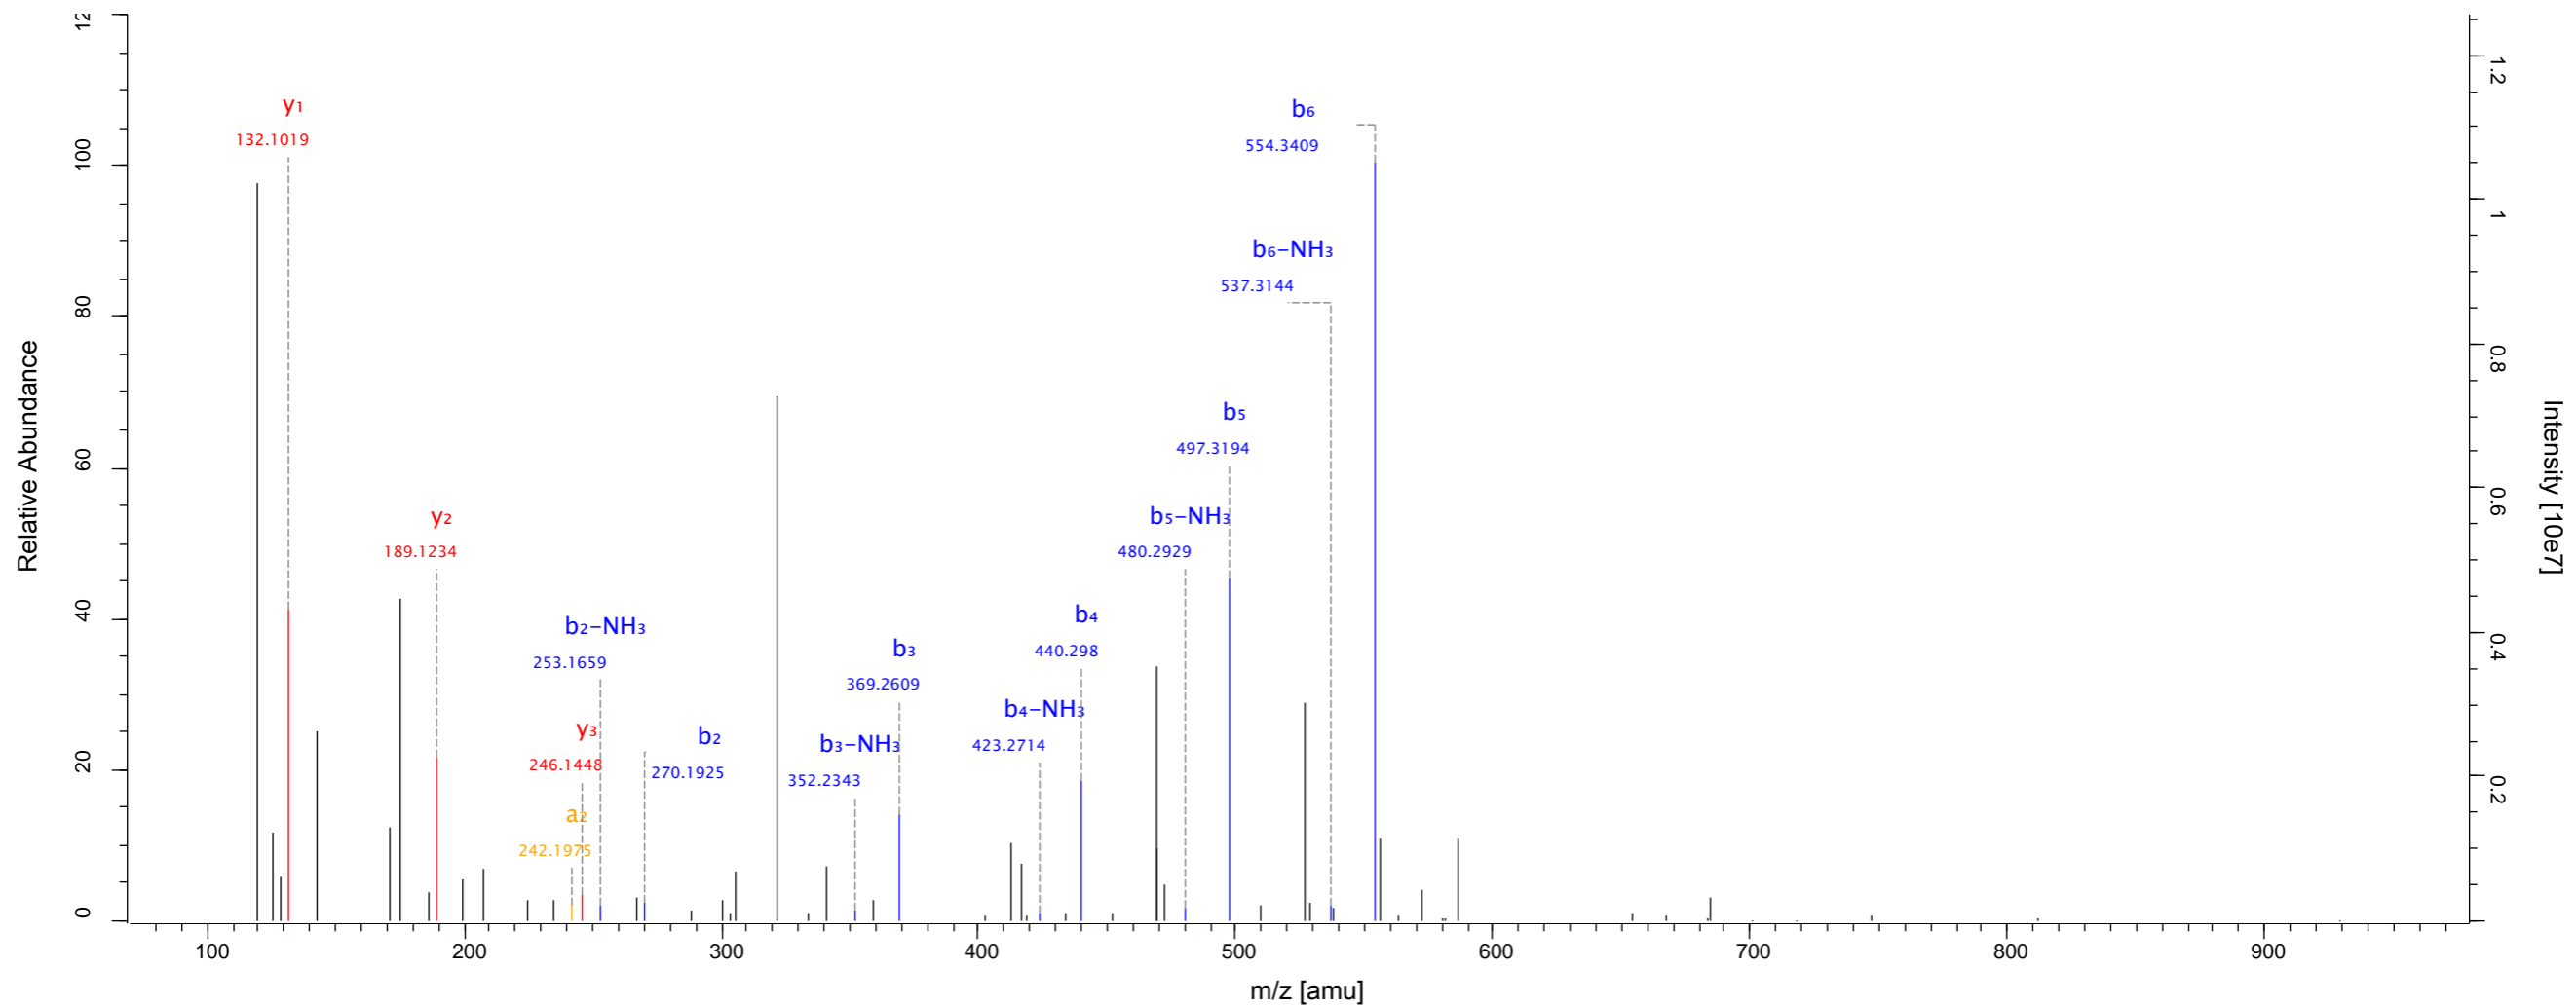

Raw file: 20111212\_EXQ5\_AnMi\_QC\_HCMVp1\_10  
 Scan number: 16769  
 Protein: ORFL185C - NC\_006273.2[111134,111490]- <unknown description>; ORFL184C.iORF3 - NC\_006273.2[111134,111379]- <unknown description>  
 Peptide score: 93.23  
 Method: FTMS; HCD

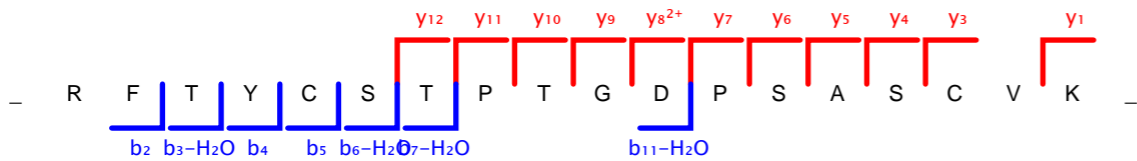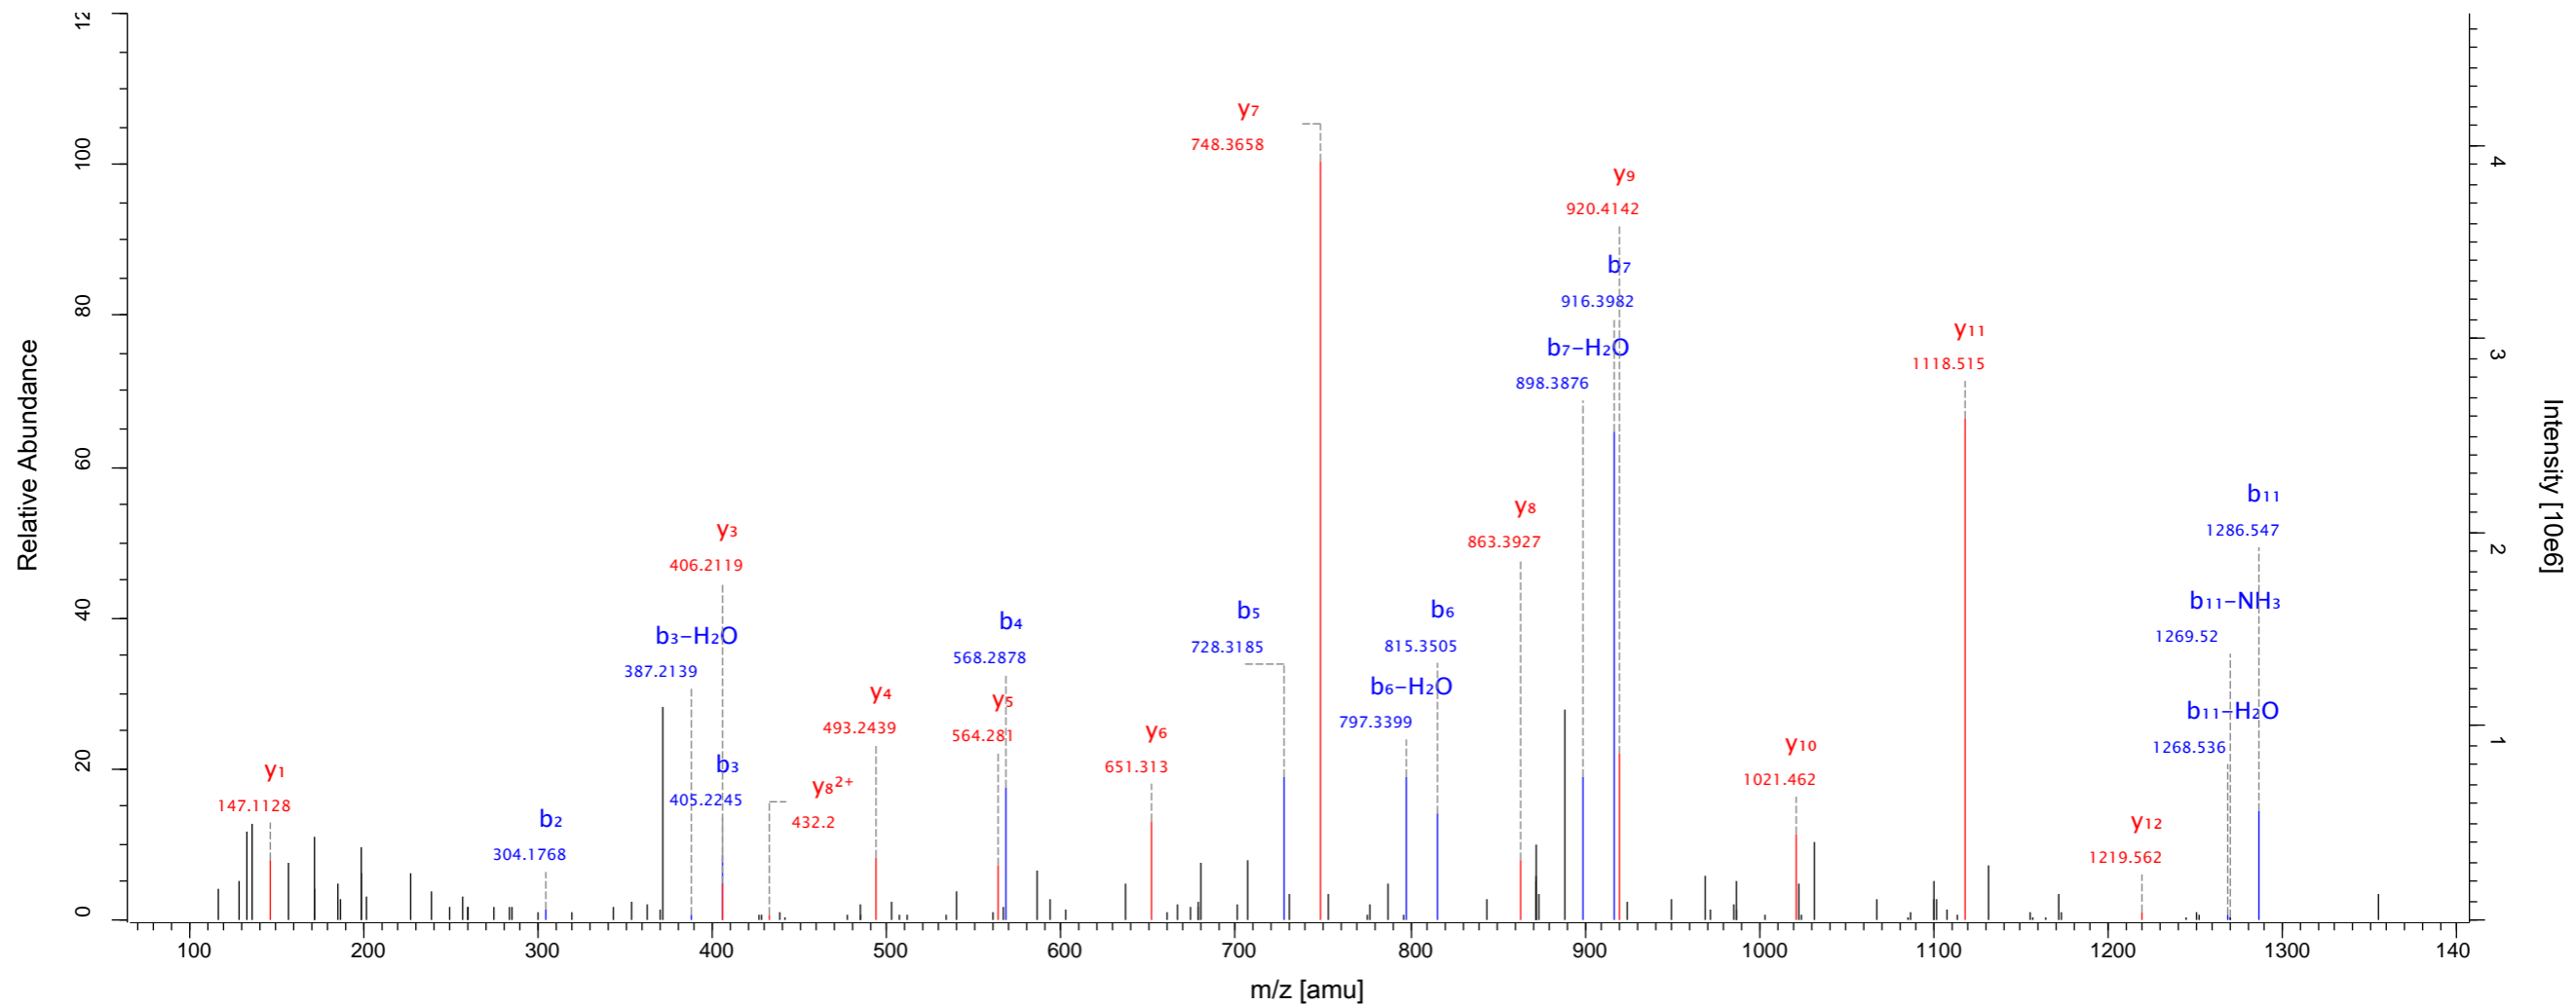

Raw file: 20111212\_EXQ5\_AnMi\_QC\_HCMVp1\_10  
 Scan number: 16907  
 Protein: ORFS365W + NC\_006273.2[225950,226606]+ <unknown description>  
 Peptide score: 91.9  
 Method: FTMS; HCD

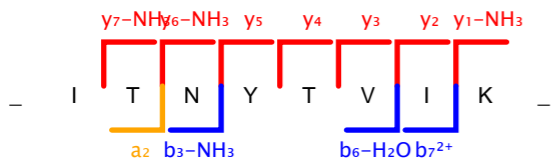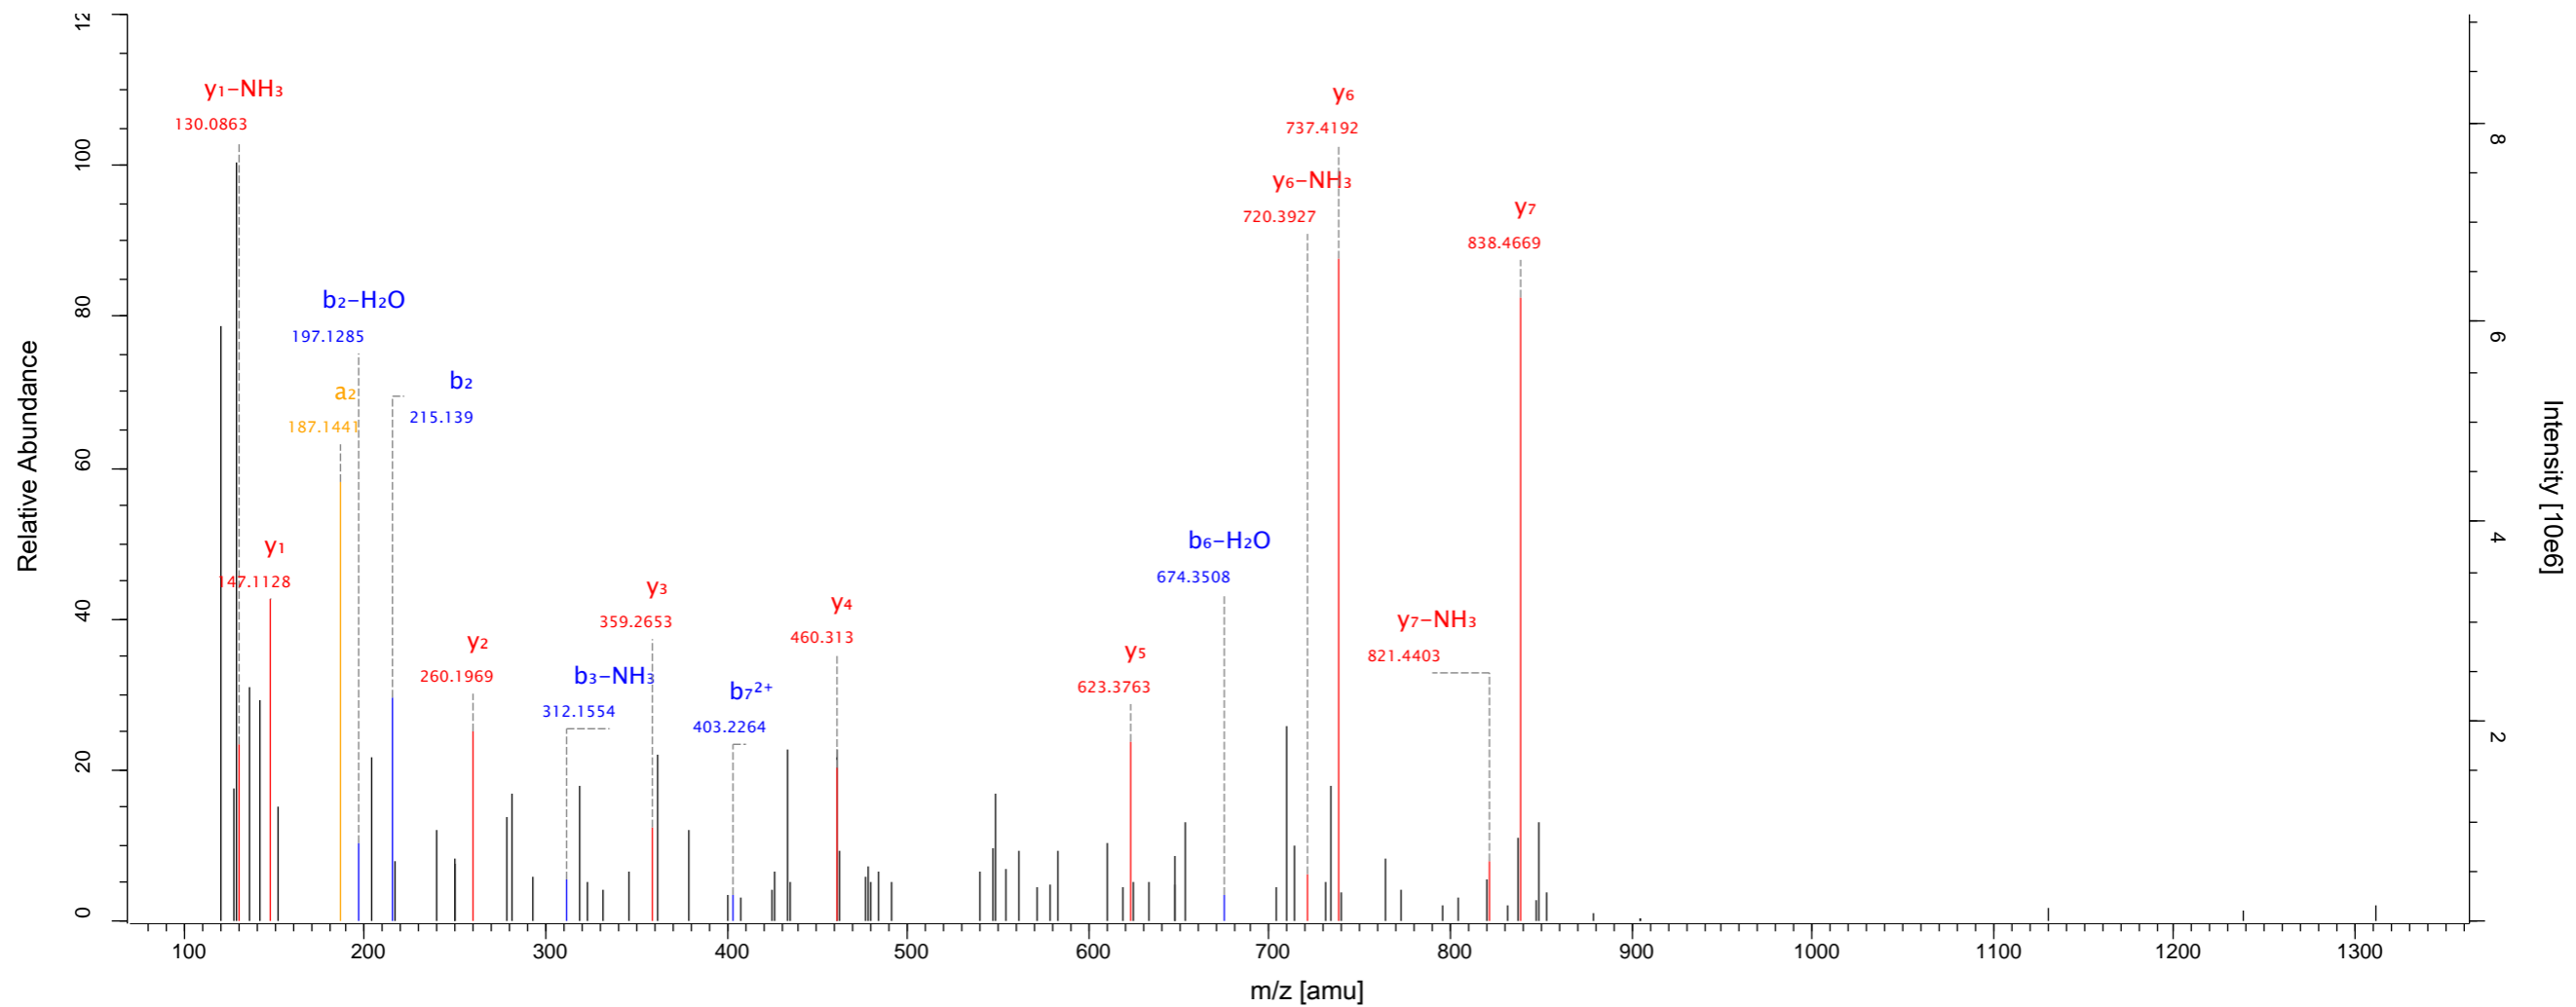

Raw file: 20111212\_EXQ5\_AnMi\_QC\_HCMVp1\_10  
Scan number: 16939  
Protein: ORFL237C - NC\_006273.2[149340,149699]- <unknown description>  
Peptide score: 115.8  
Method: FTMS; HCD

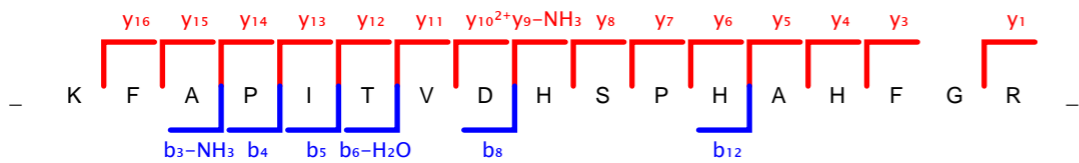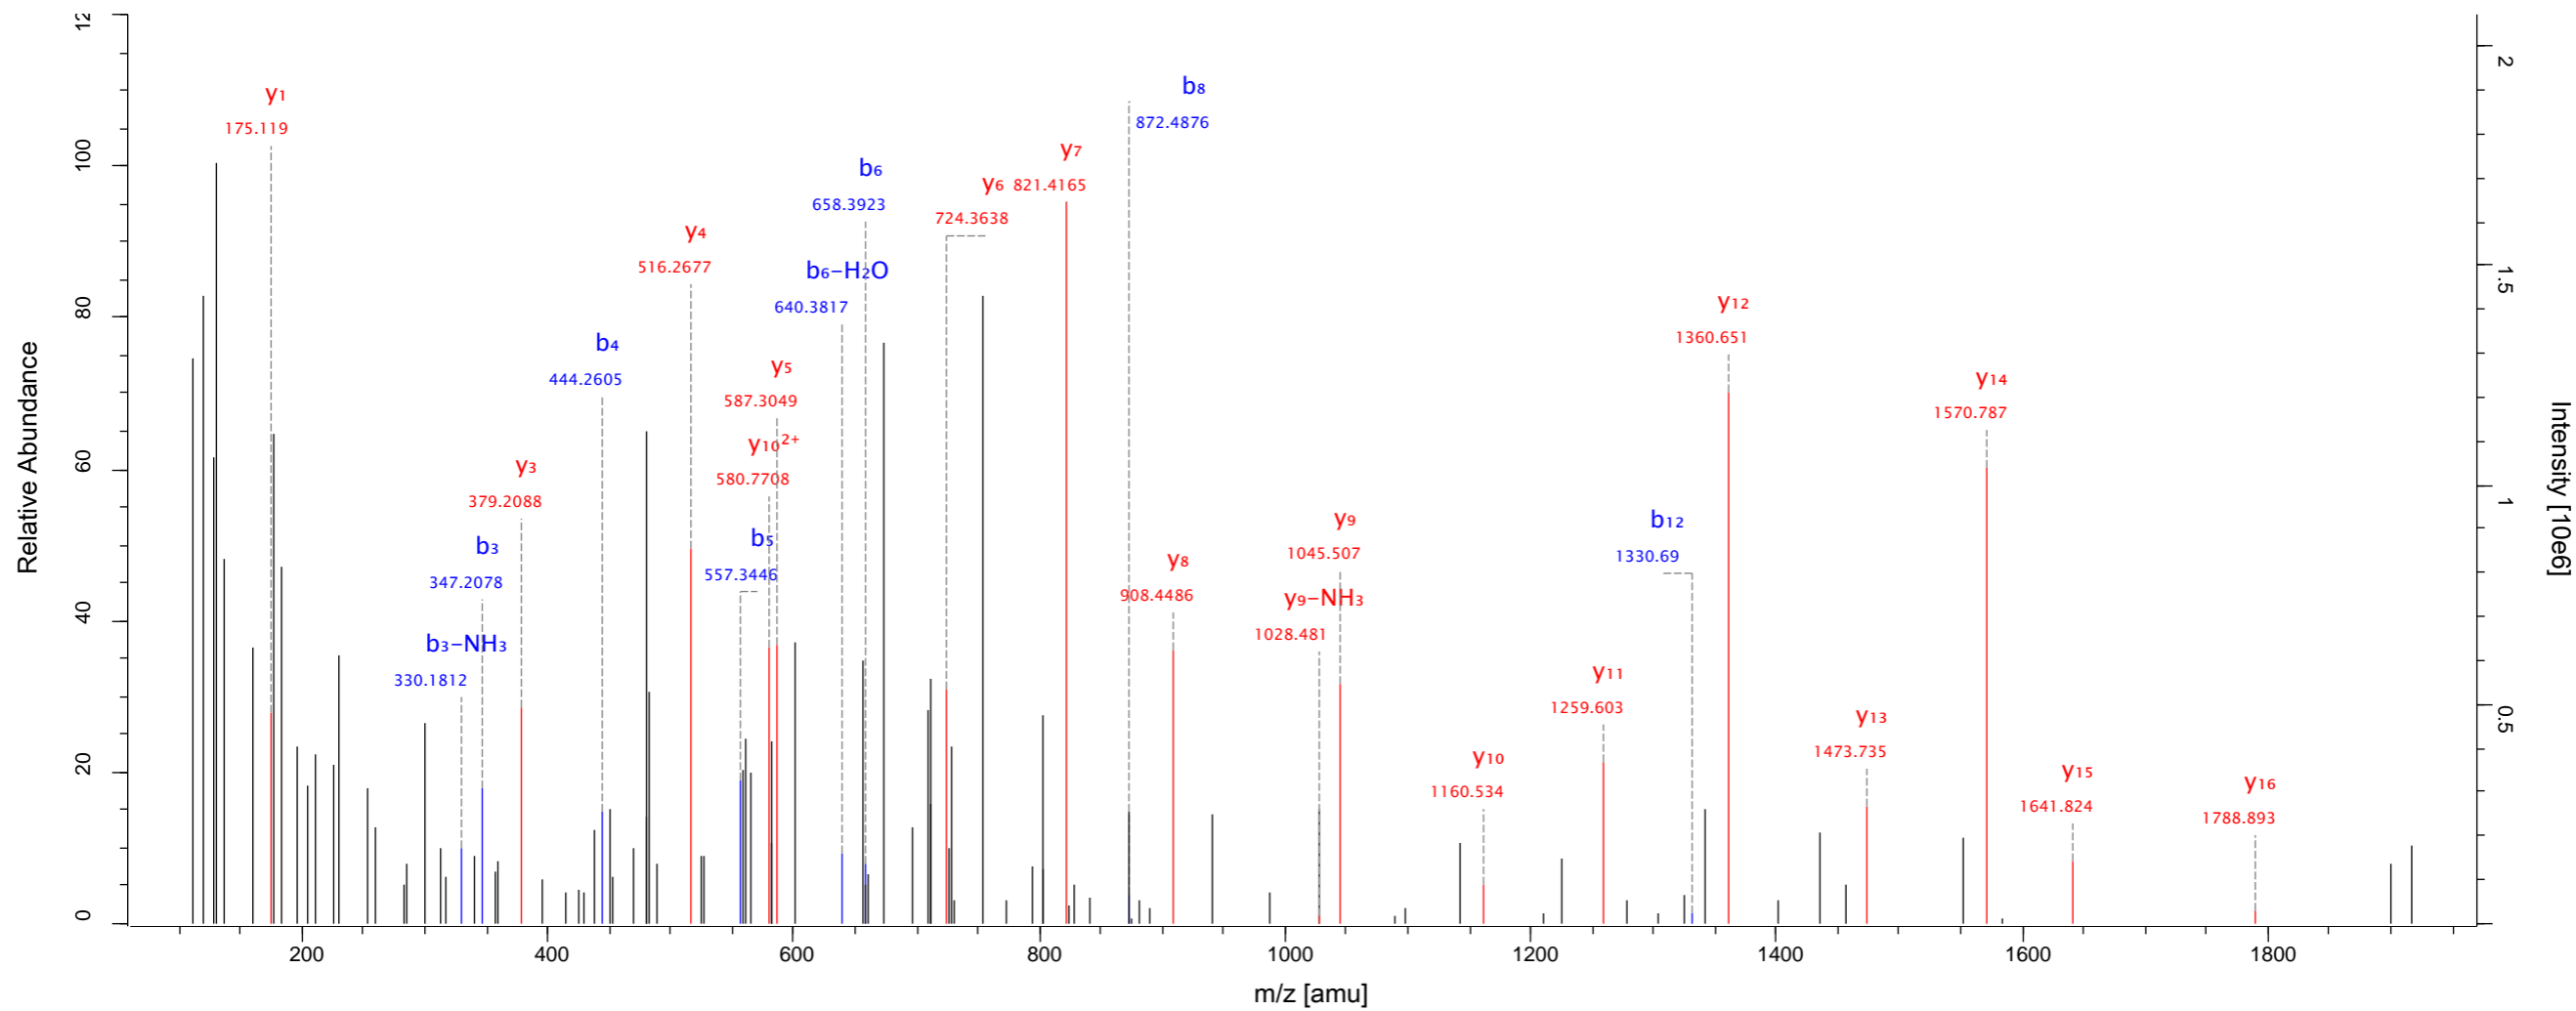

Raw file: 20111212\_EXQ5\_AnMi\_QC\_HCMVp11\_10  
Scan number: 17005  
Protein: ORFL137W.IORF1 + NC\_006273.2[75299,75529]+ <unknown description>  
Peptide score: 123.99  
Method: FTMS; HCD

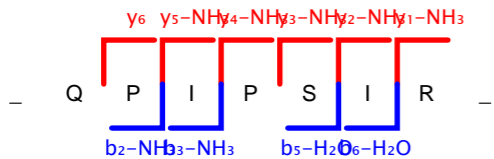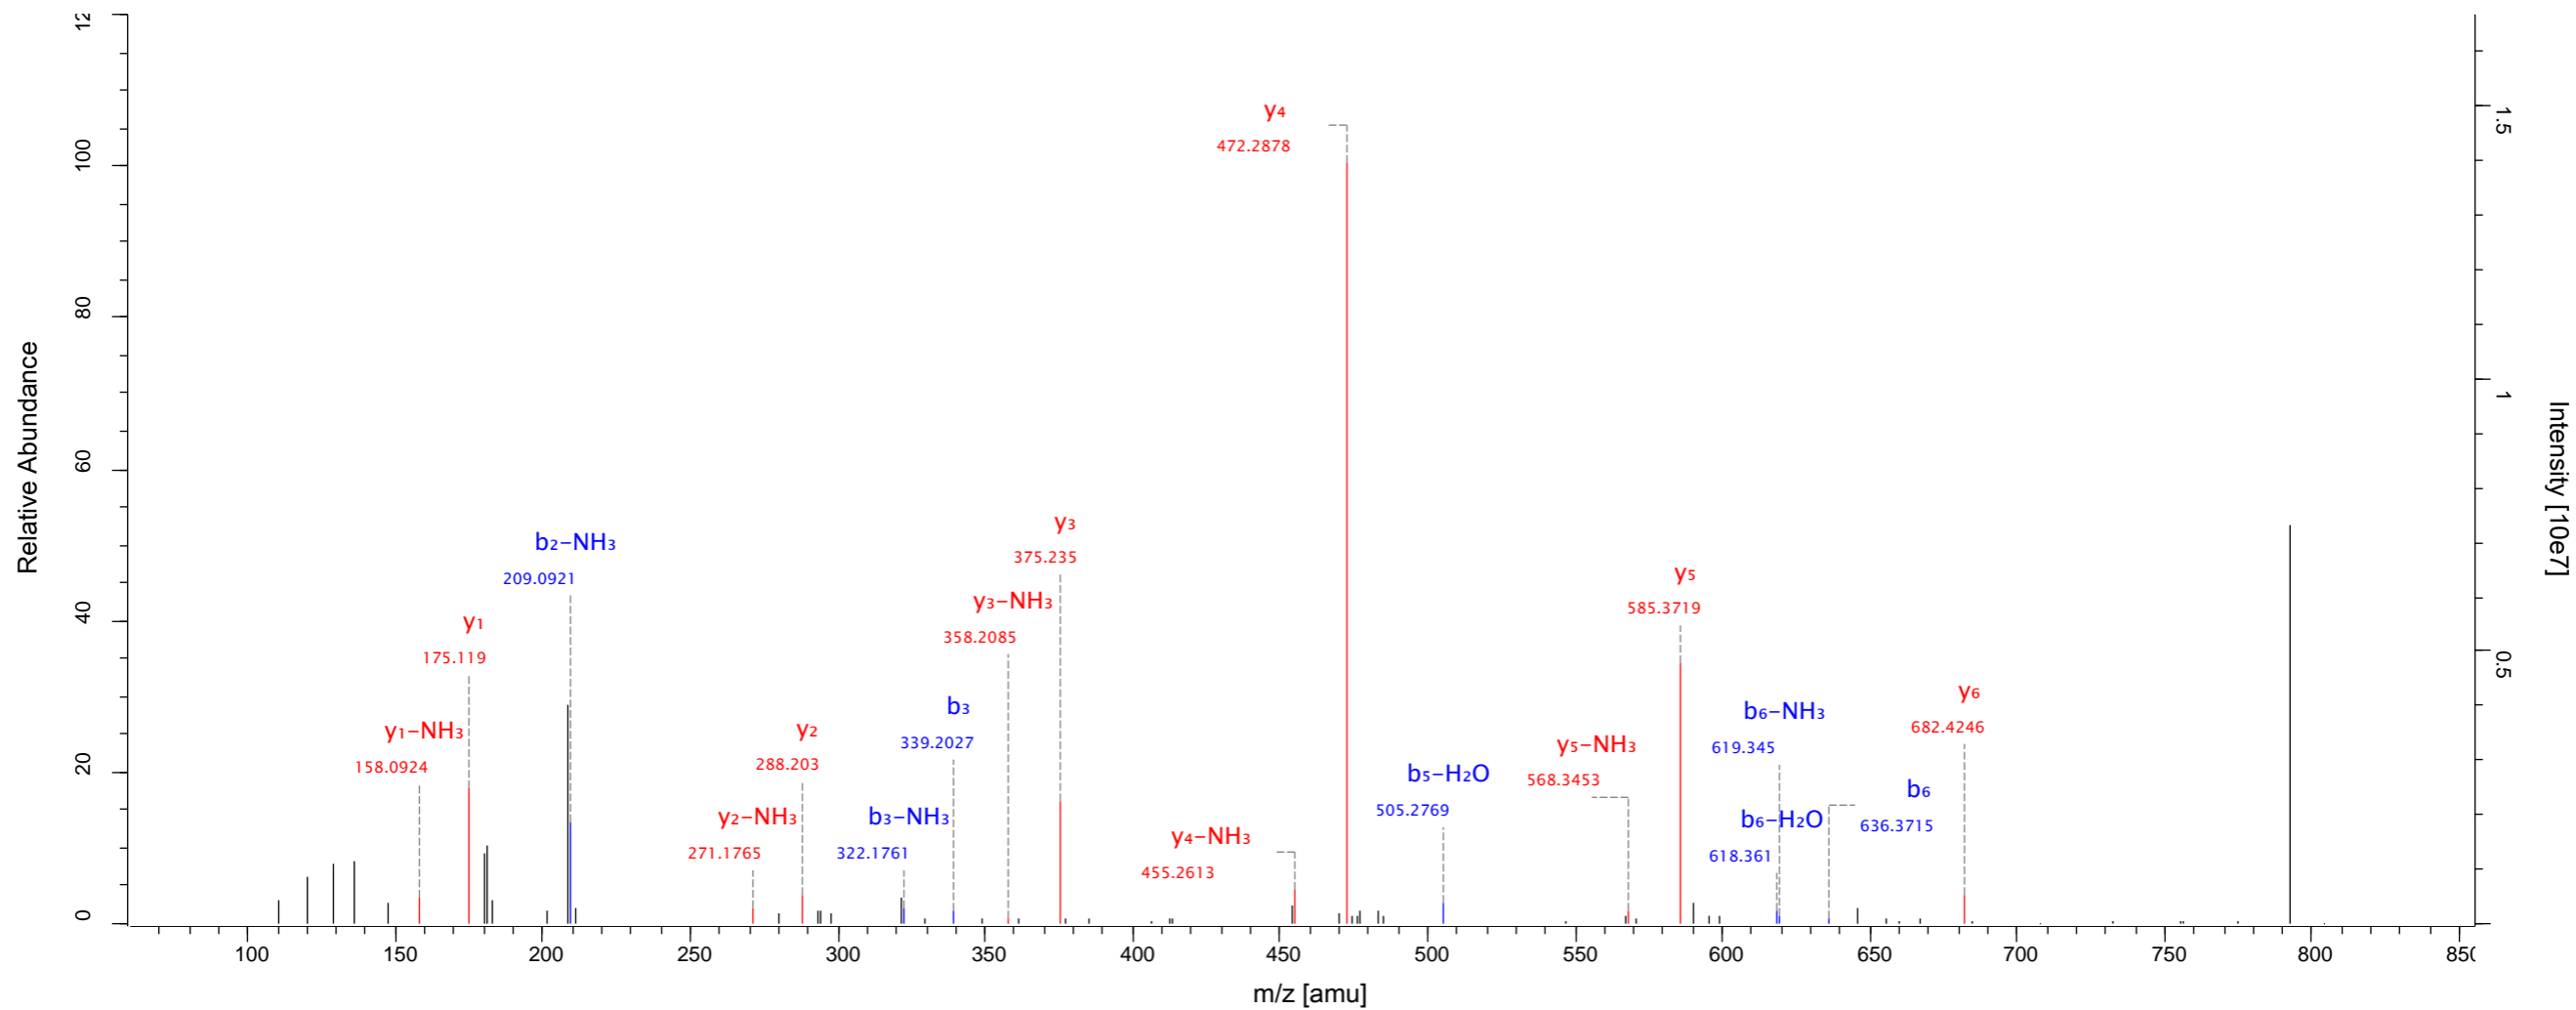

Raw file: 20111212\_EXQ5\_AnMi\_QC\_HCMVp1\_10  
 Scan number: 17481  
 Protein: ORFS334W + NC\_006273.2[204331,204558]+ <unknown description>  
 Peptide score: 166.66  
 Method: FTMS; HCD

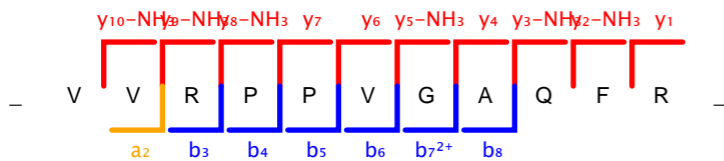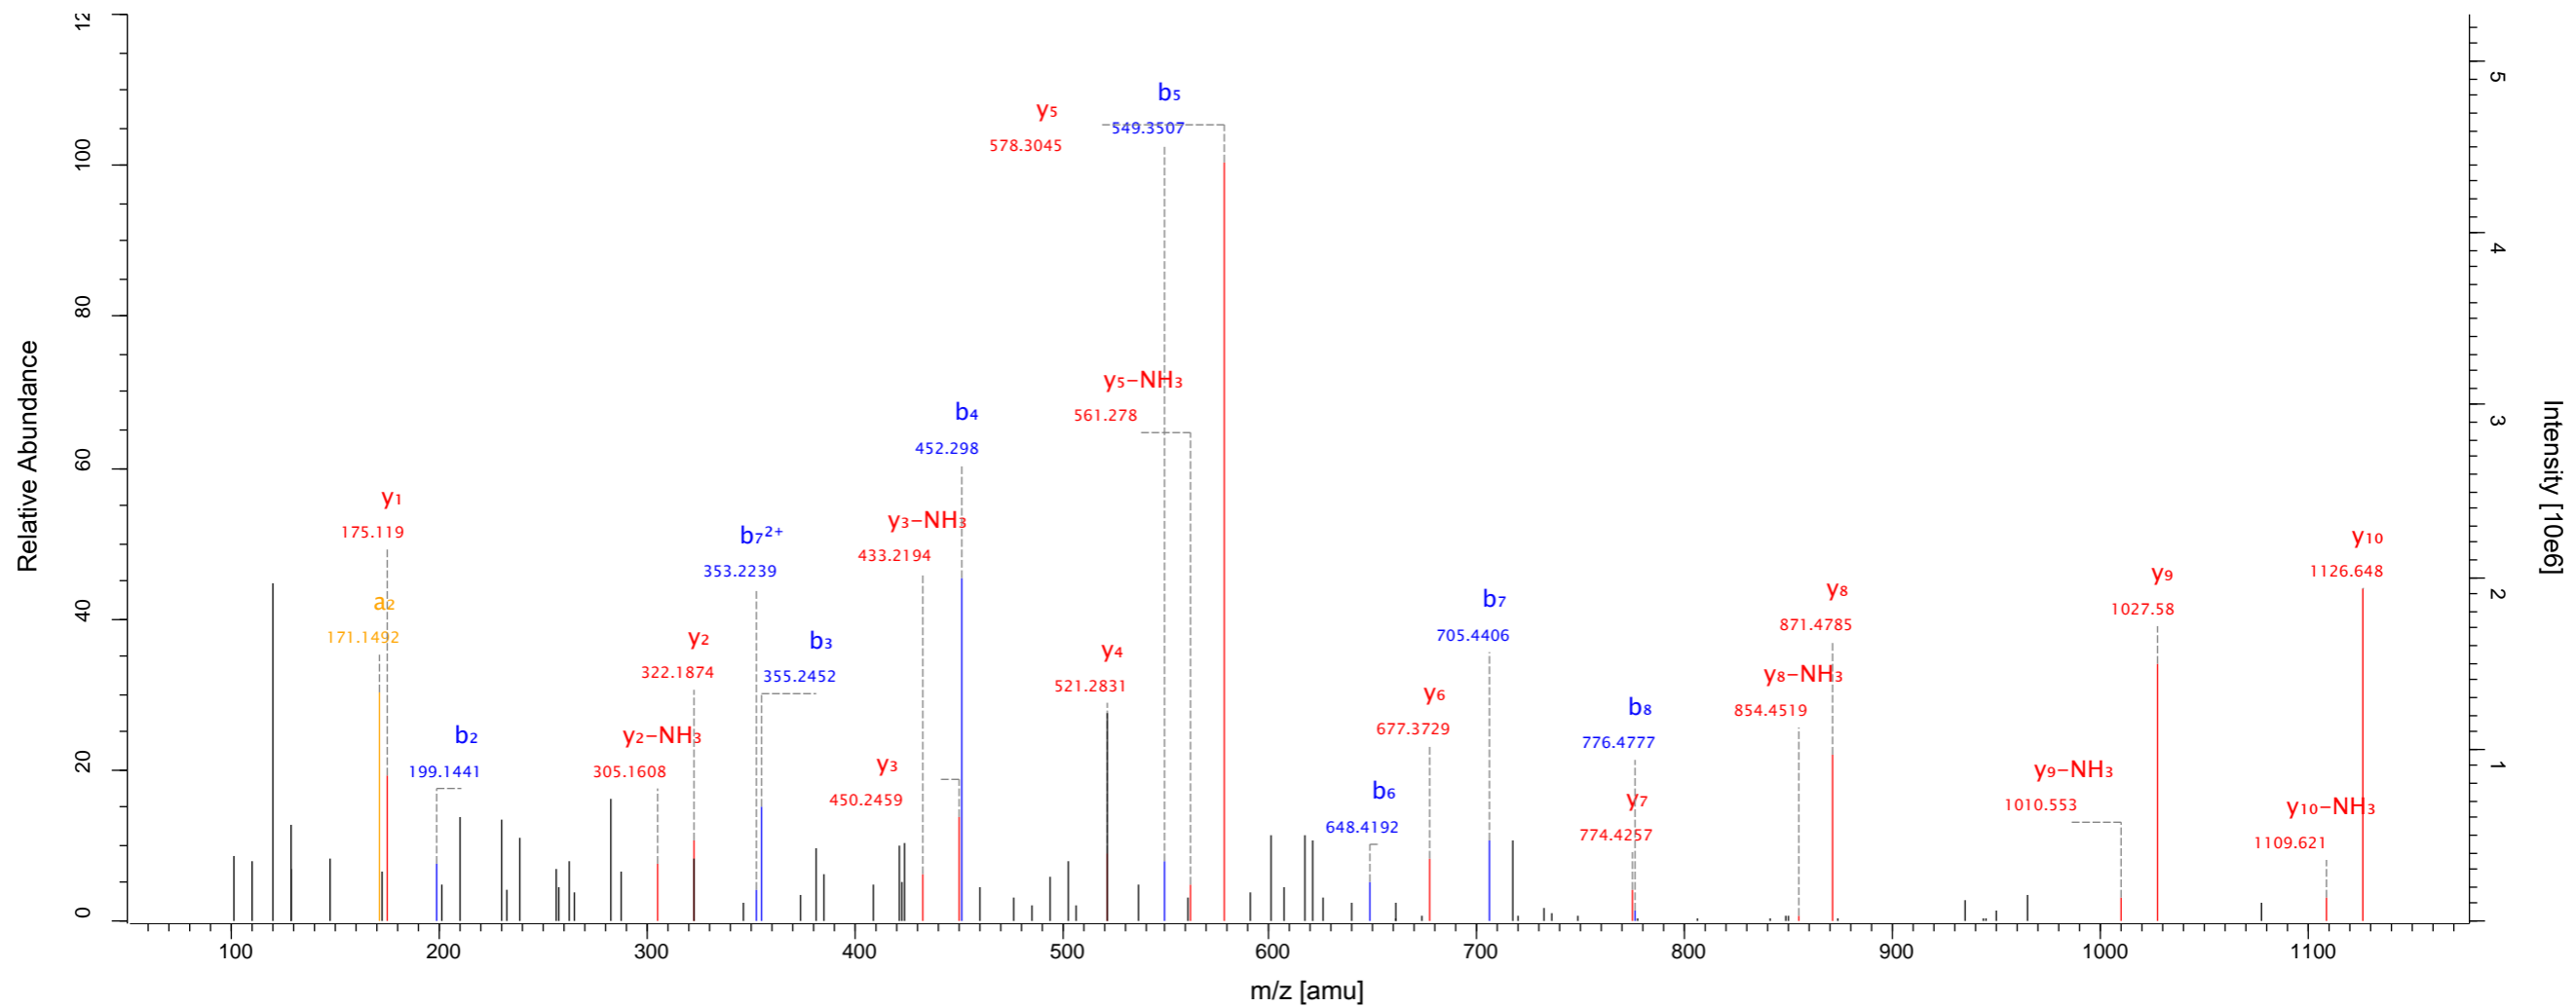



Raw file: 20111212\_EXQ5\_AnMi\_QC\_HCMVp11\_10  
Scan number: 18718  
Protein: ORFL88C - NC\_006273.2[37894,38133]- <unknown description>  
Peptide score: 119.21  
Method: FTMS; HCD

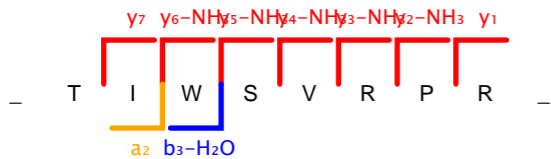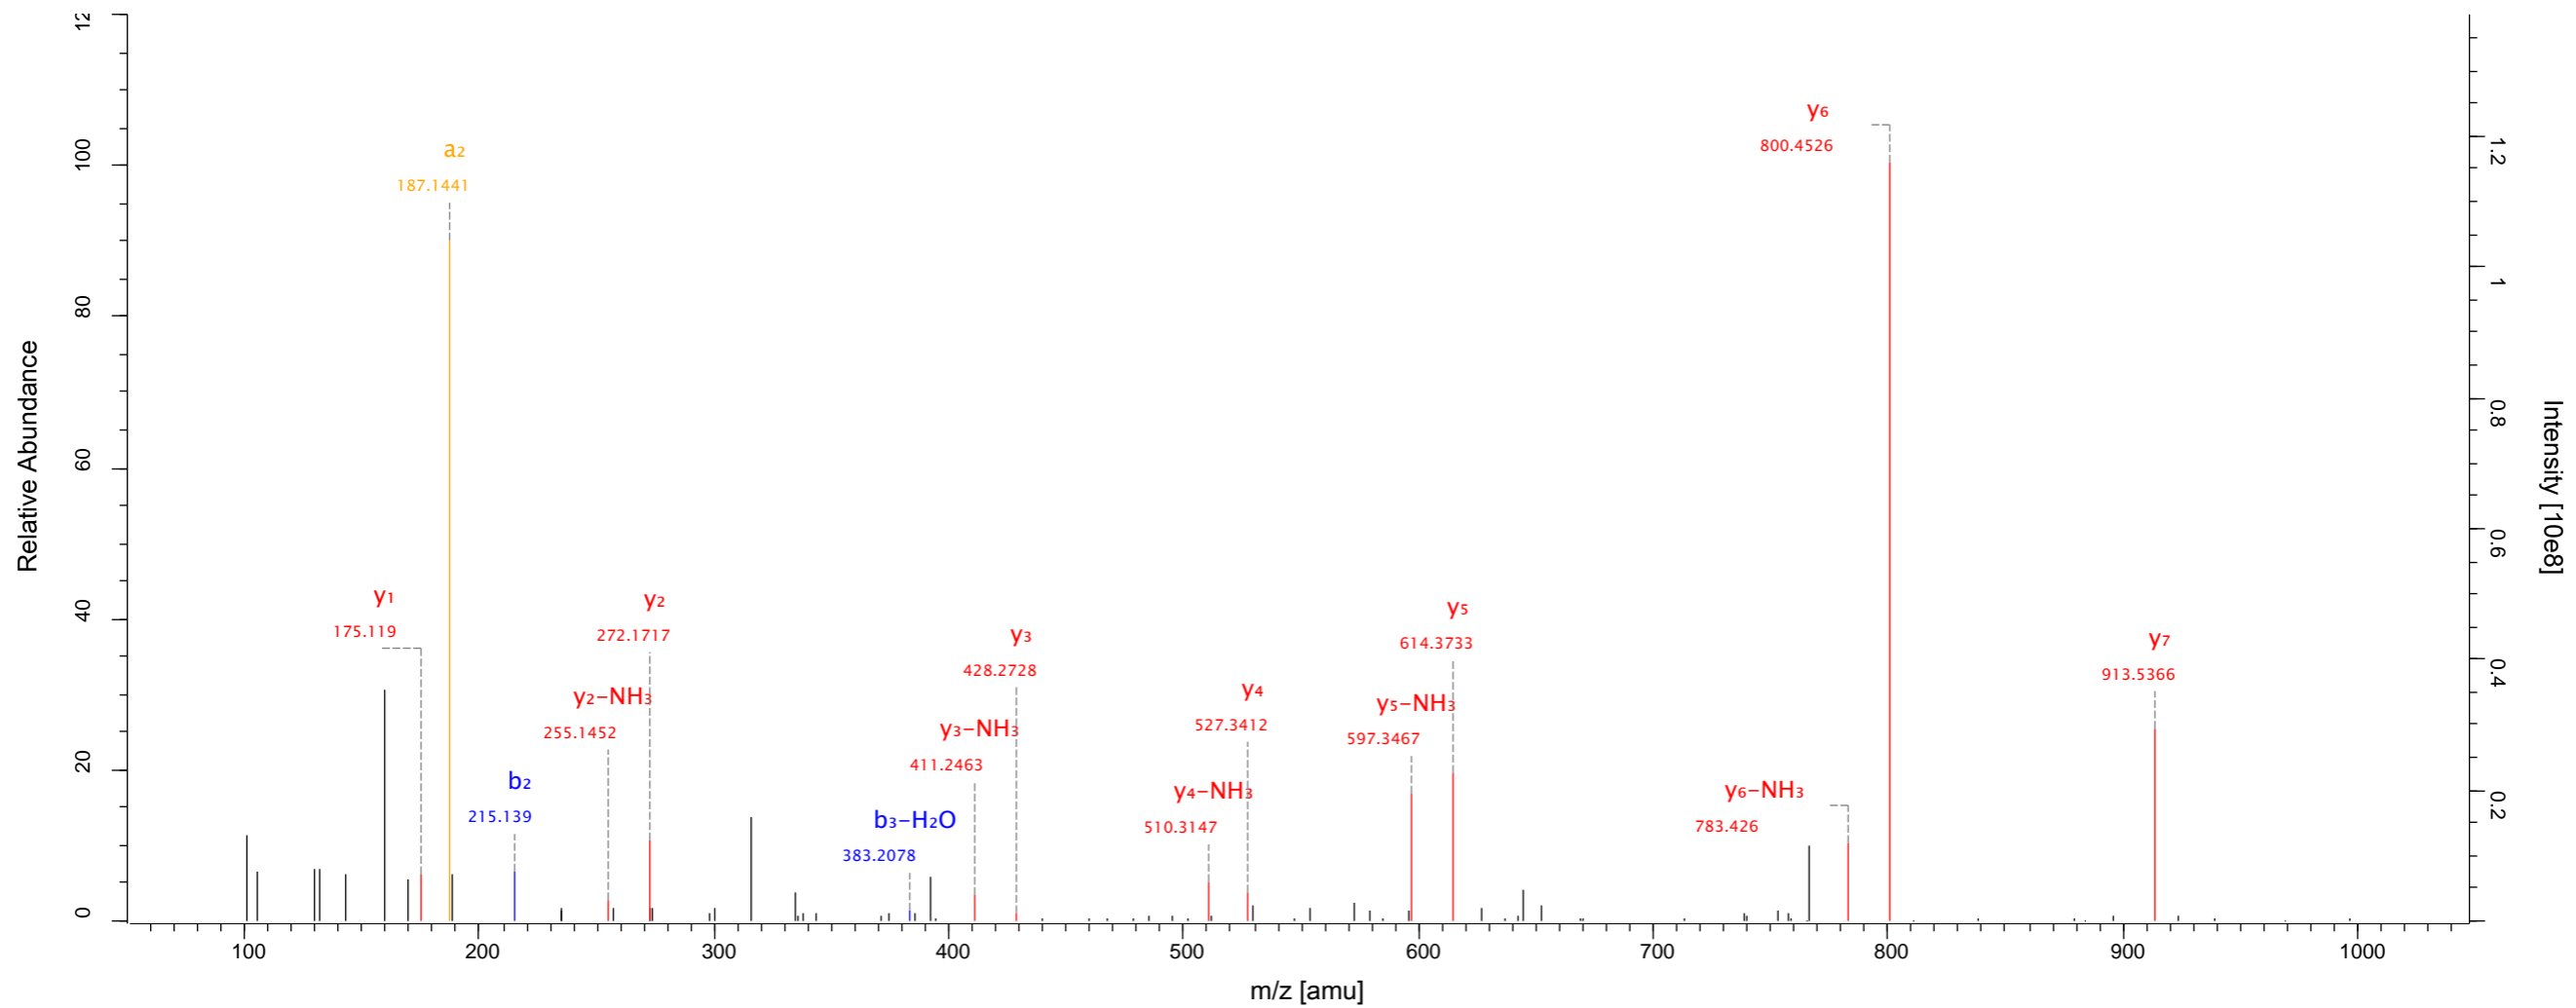

Raw file: 20111212\_EXQ5\_AnMi\_QC\_HCMVp1\_10  
Scan number: 18744  
Protein: ORFL298W + NC\_006273.2[184737,184916]+ <unknown description>  
Peptide score: 103.67  
Method: FTMS; HCD

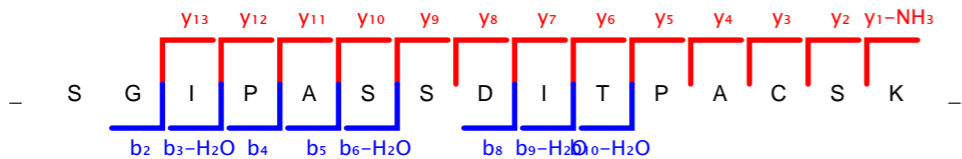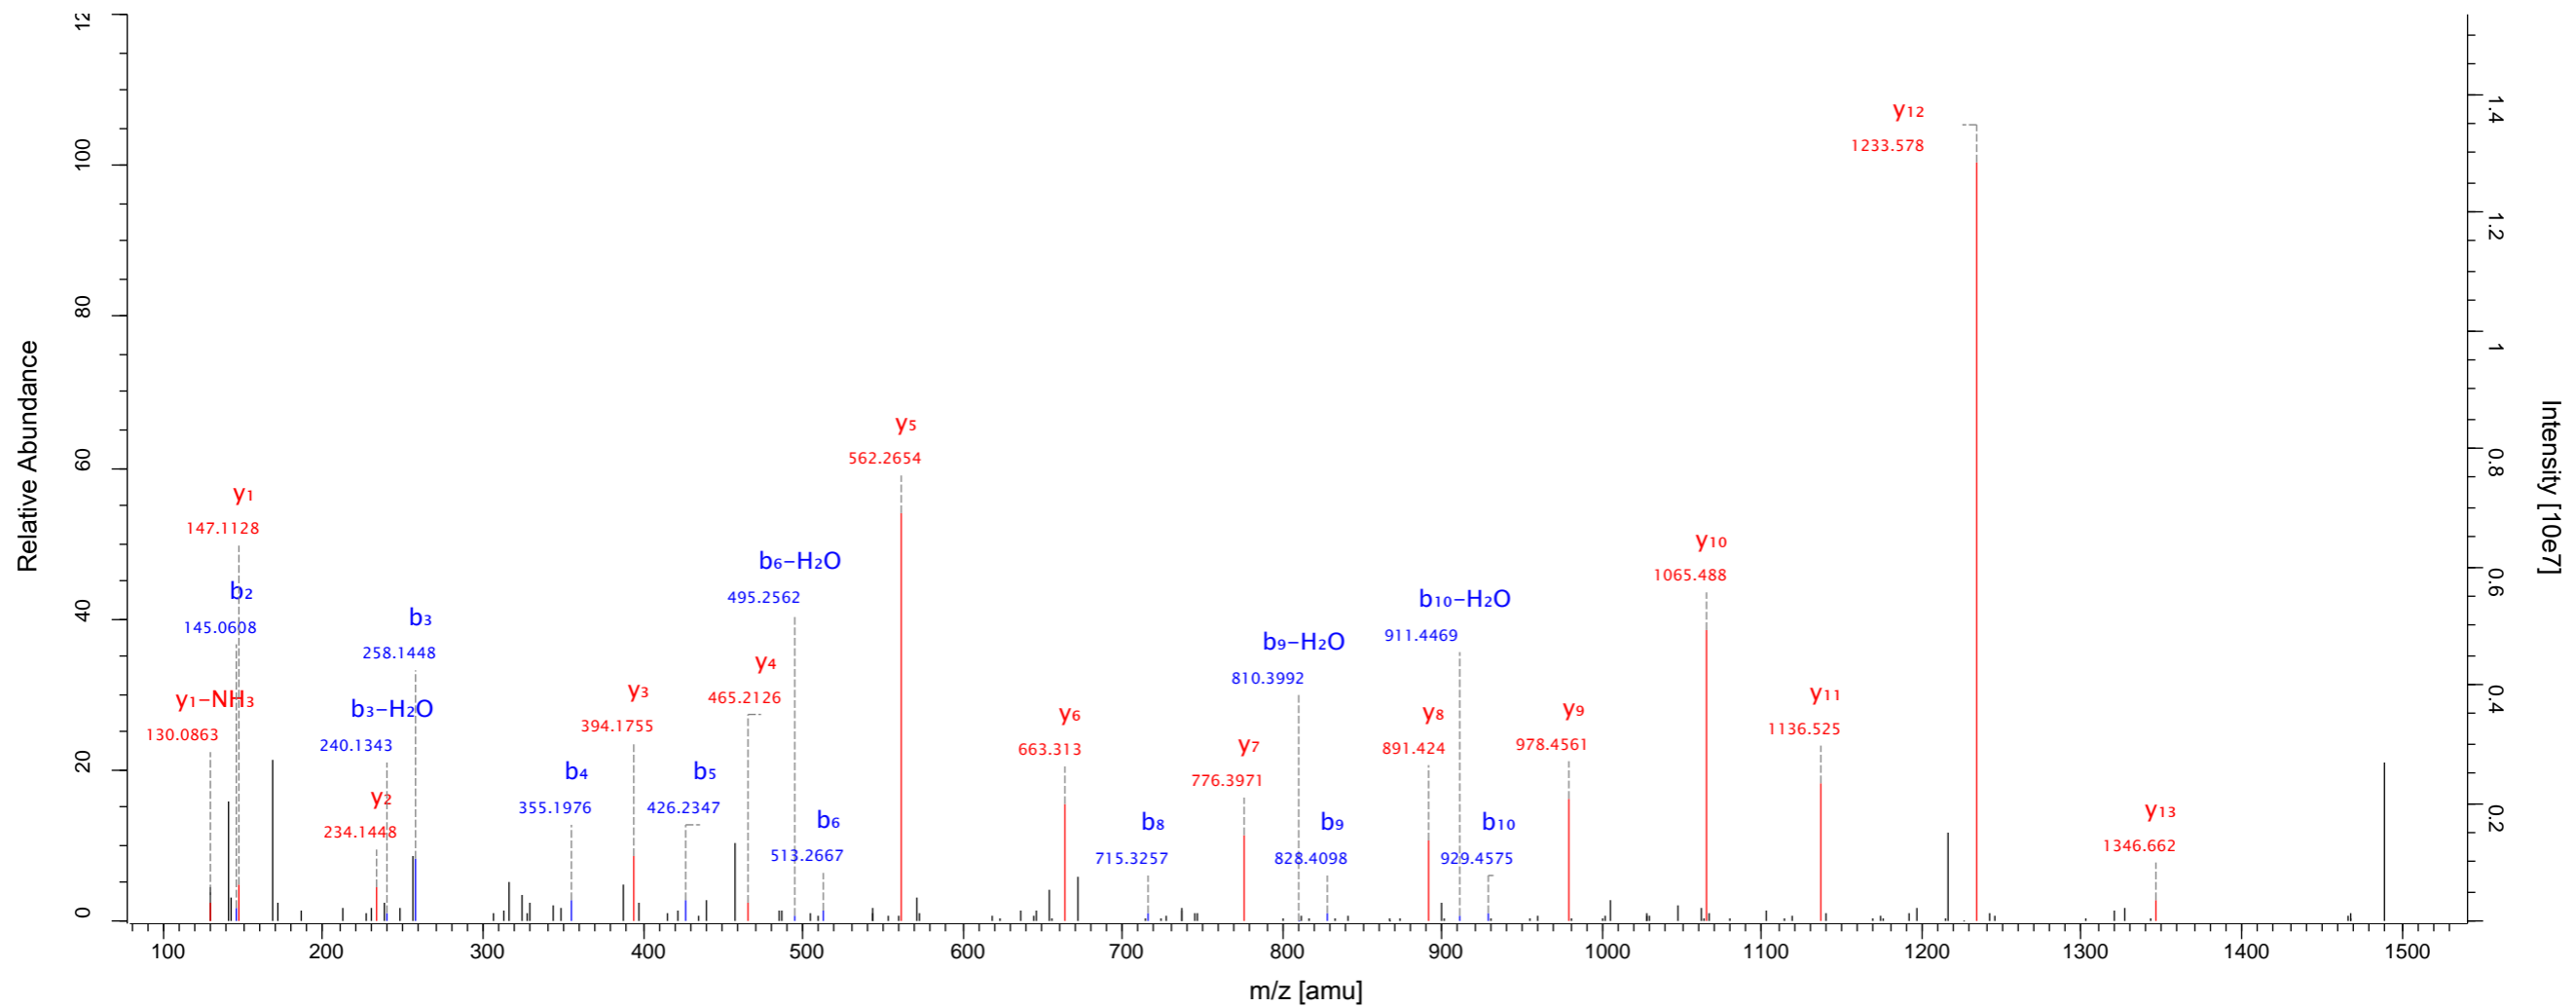

Raw file: 20111212\_EXQ5\_AnMi\_QC\_HCMVp1\_10  
 Scan number: 19168  
 Protein: ORFL185C - NC\_006273.2[111134,111490]- <unknown description>; ORFL184C.iORF3 - NC\_006273.2[111134,111379]- <unknown description>  
 Peptide score: 120.3  
 Method: FTMS; HCD

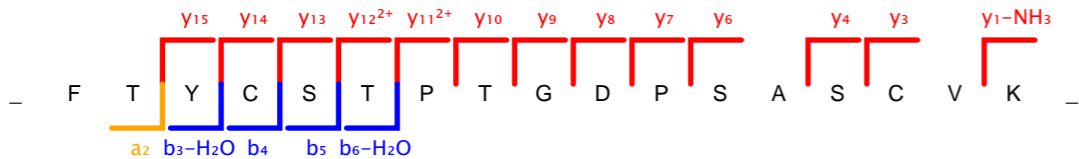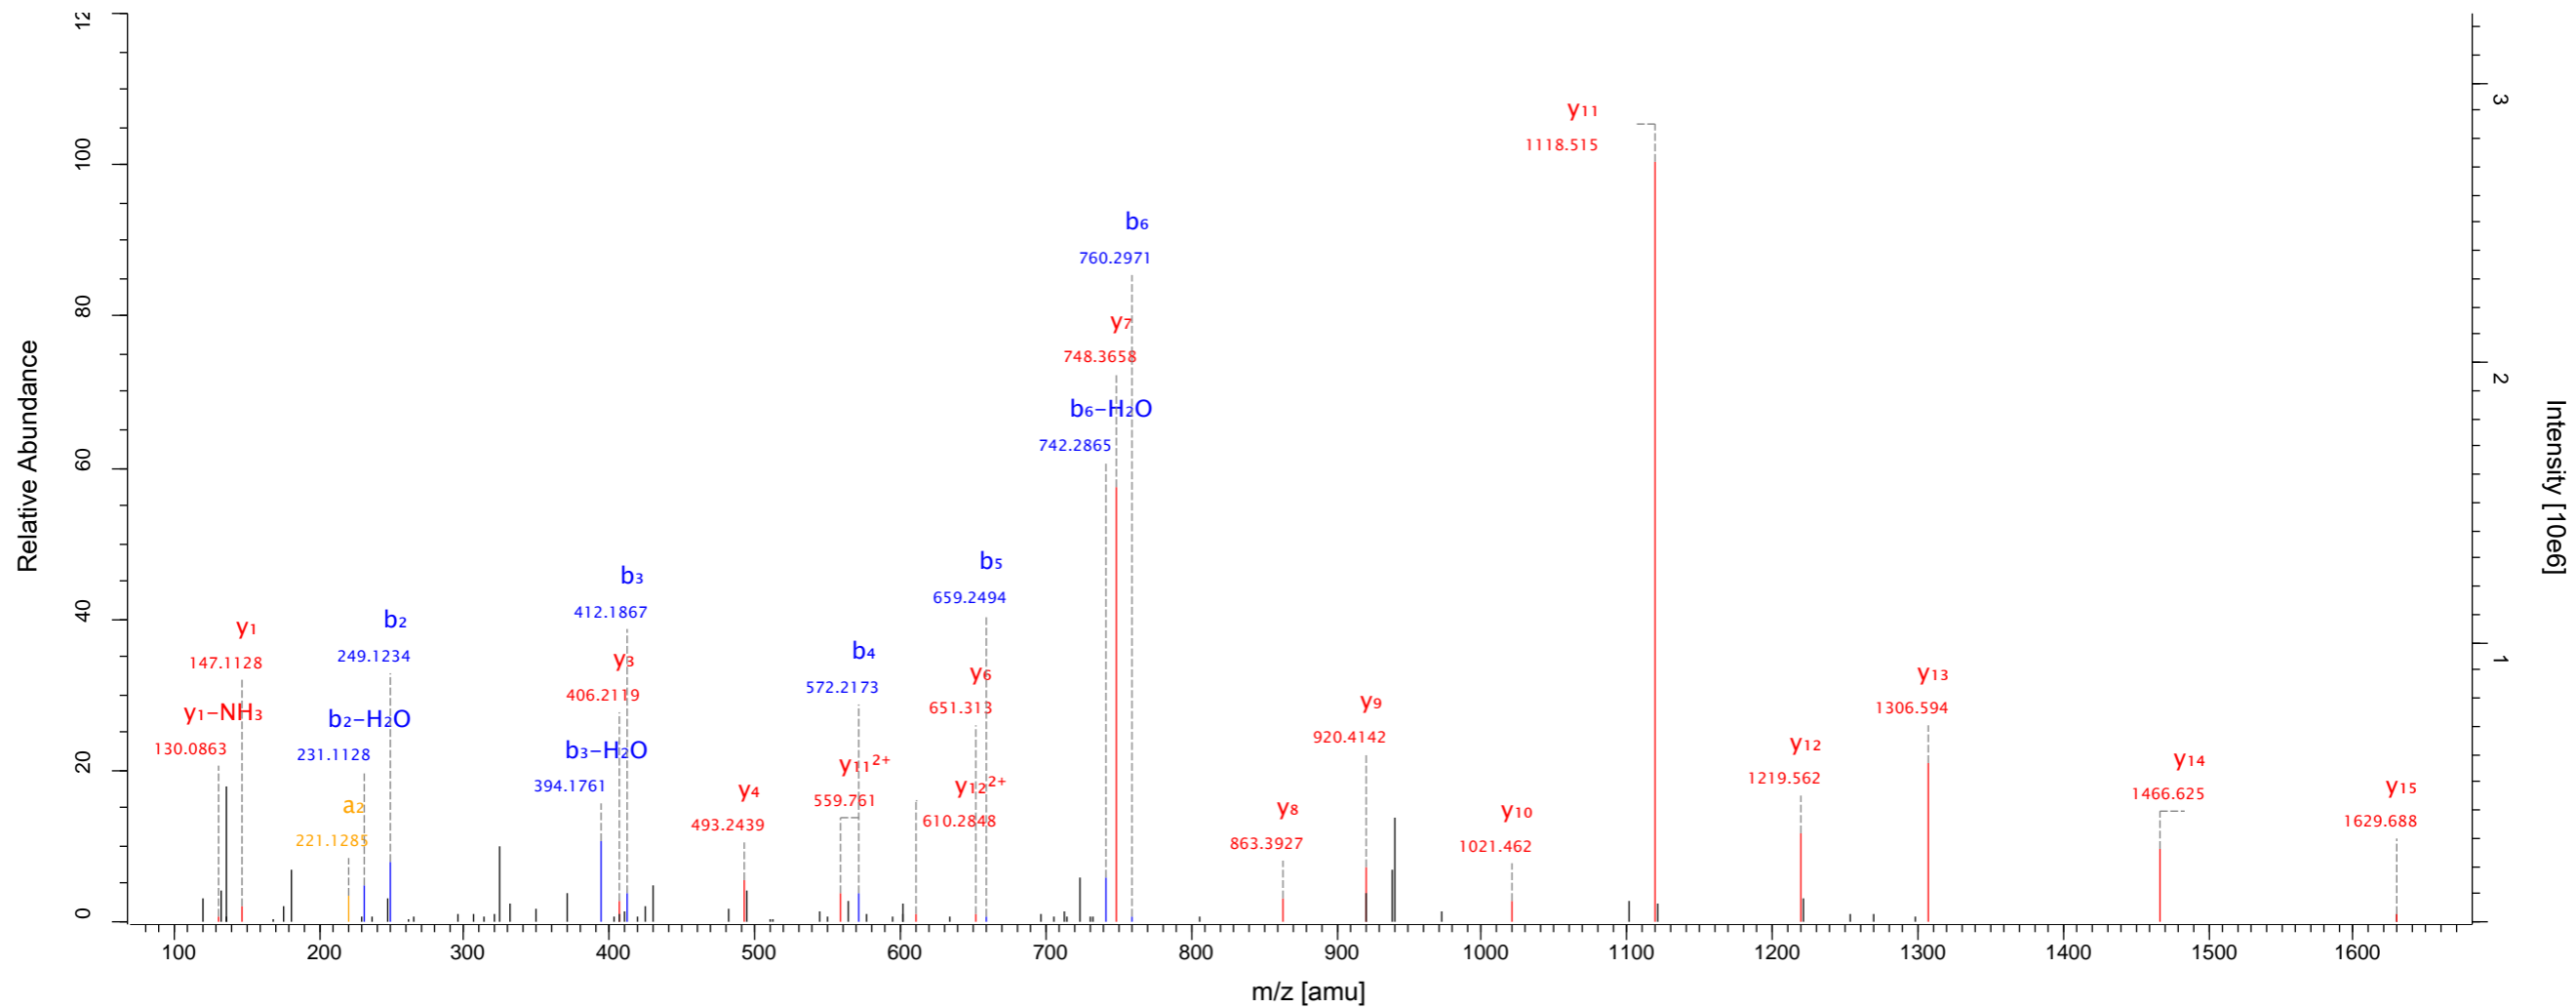

Raw file: 20111212\_EXQ5\_AnMi\_QC\_HCMVp1\_10  
 Scan number: 19236  
 Protein: ORFL174C.iORF2 - NC\_006273.2[106396,106770]- <unknown description>  
 Peptide score: 129.43  
 Method: FTMS; HCD

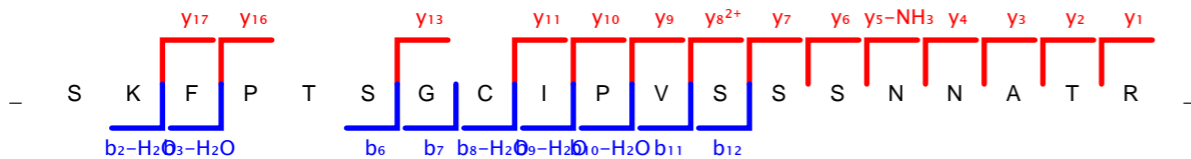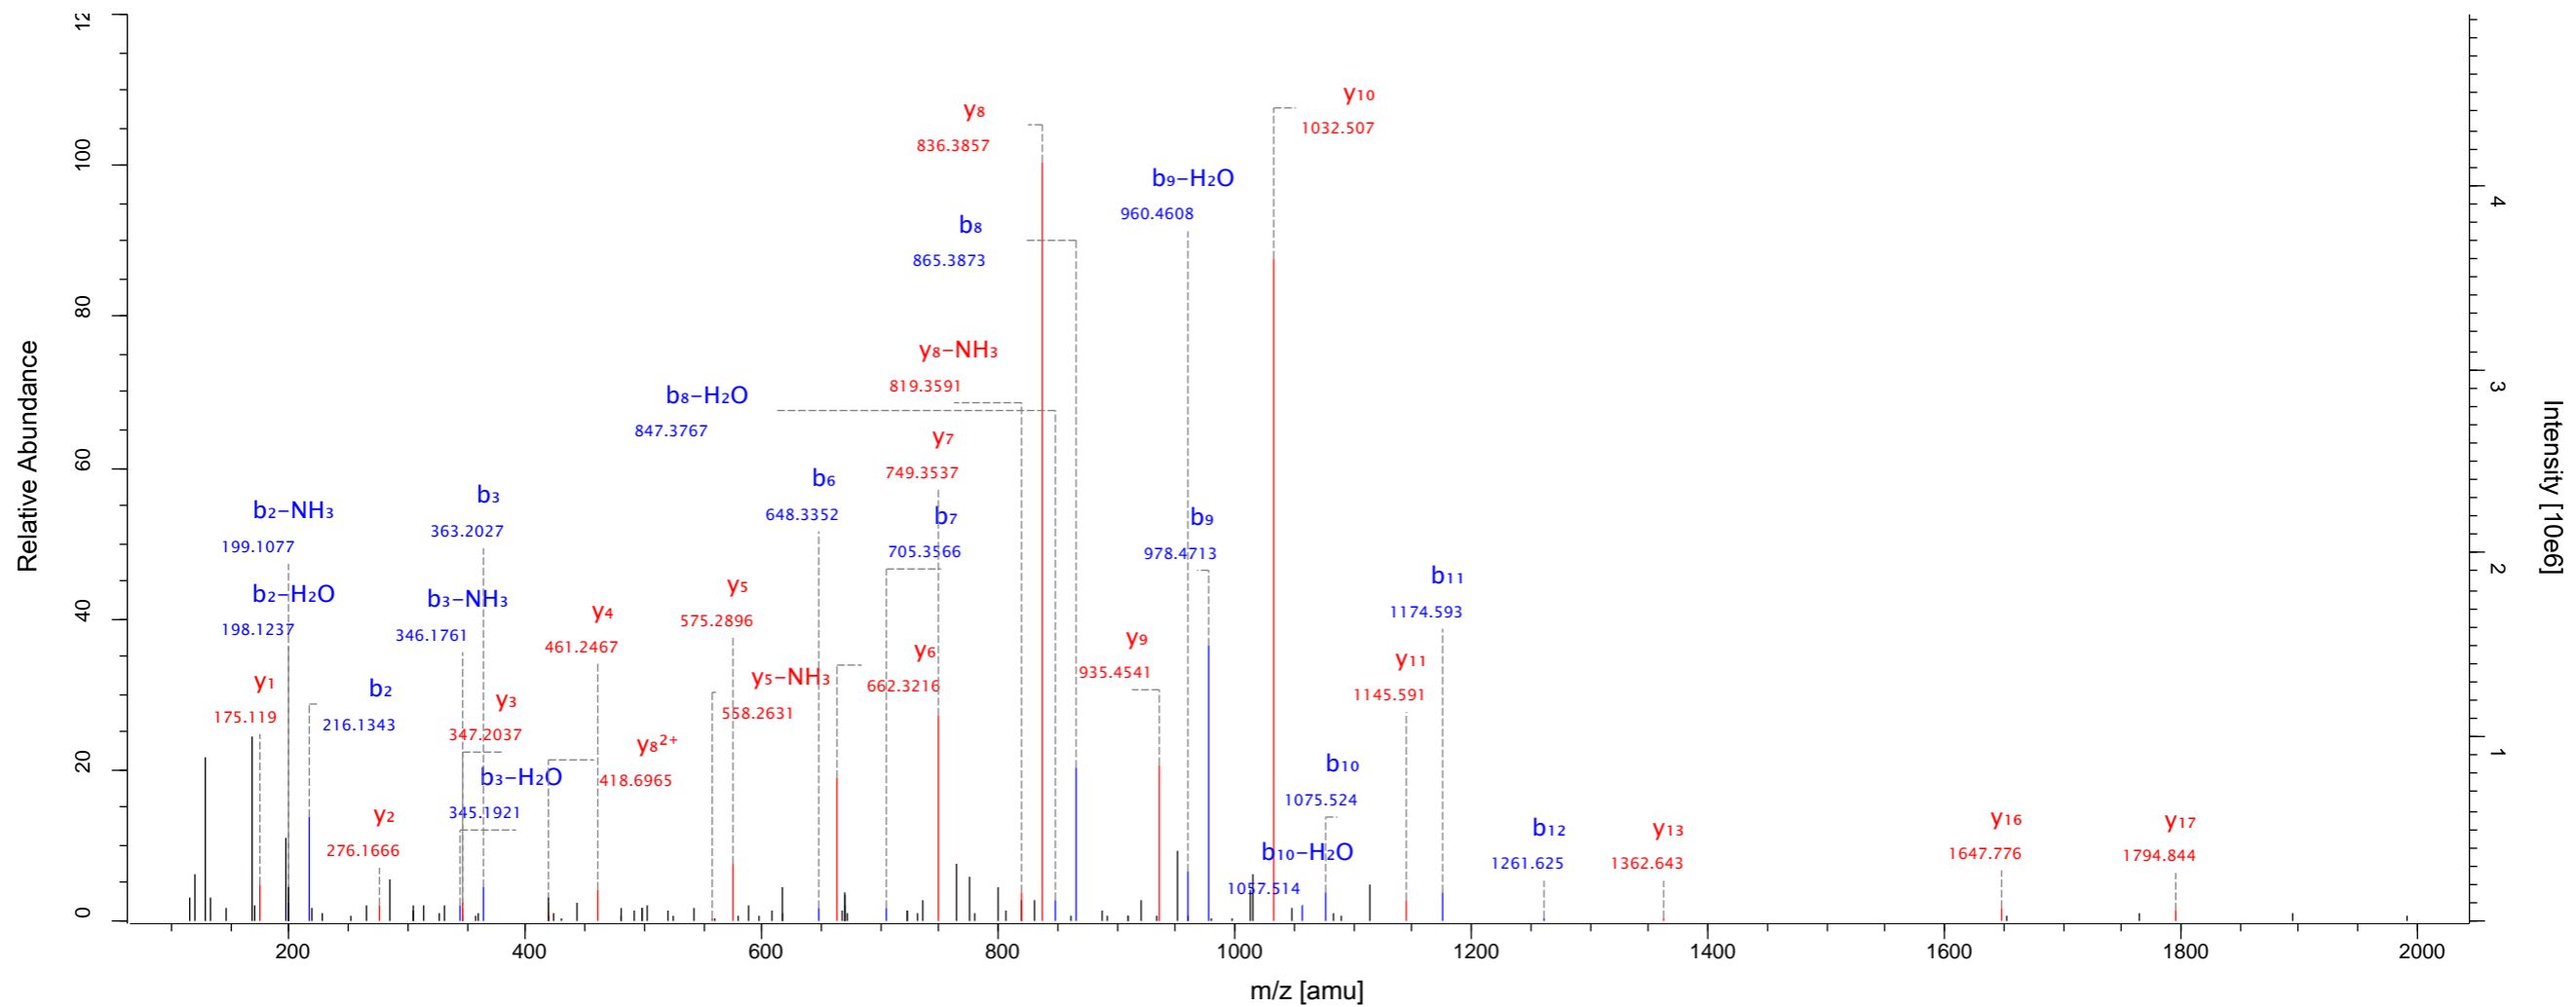

Raw file: 20111212\_EXQ5\_AnMi\_QC\_HCMVp11\_10  
Scan number: 19316  
Protein: ORFL142W + NC\_006273.2[78726,79031]+ <unknown description>  
Peptide score: 83.05  
Method: FTMS; HCD

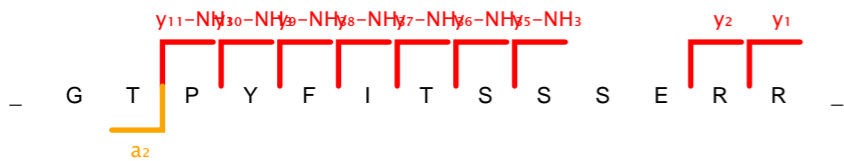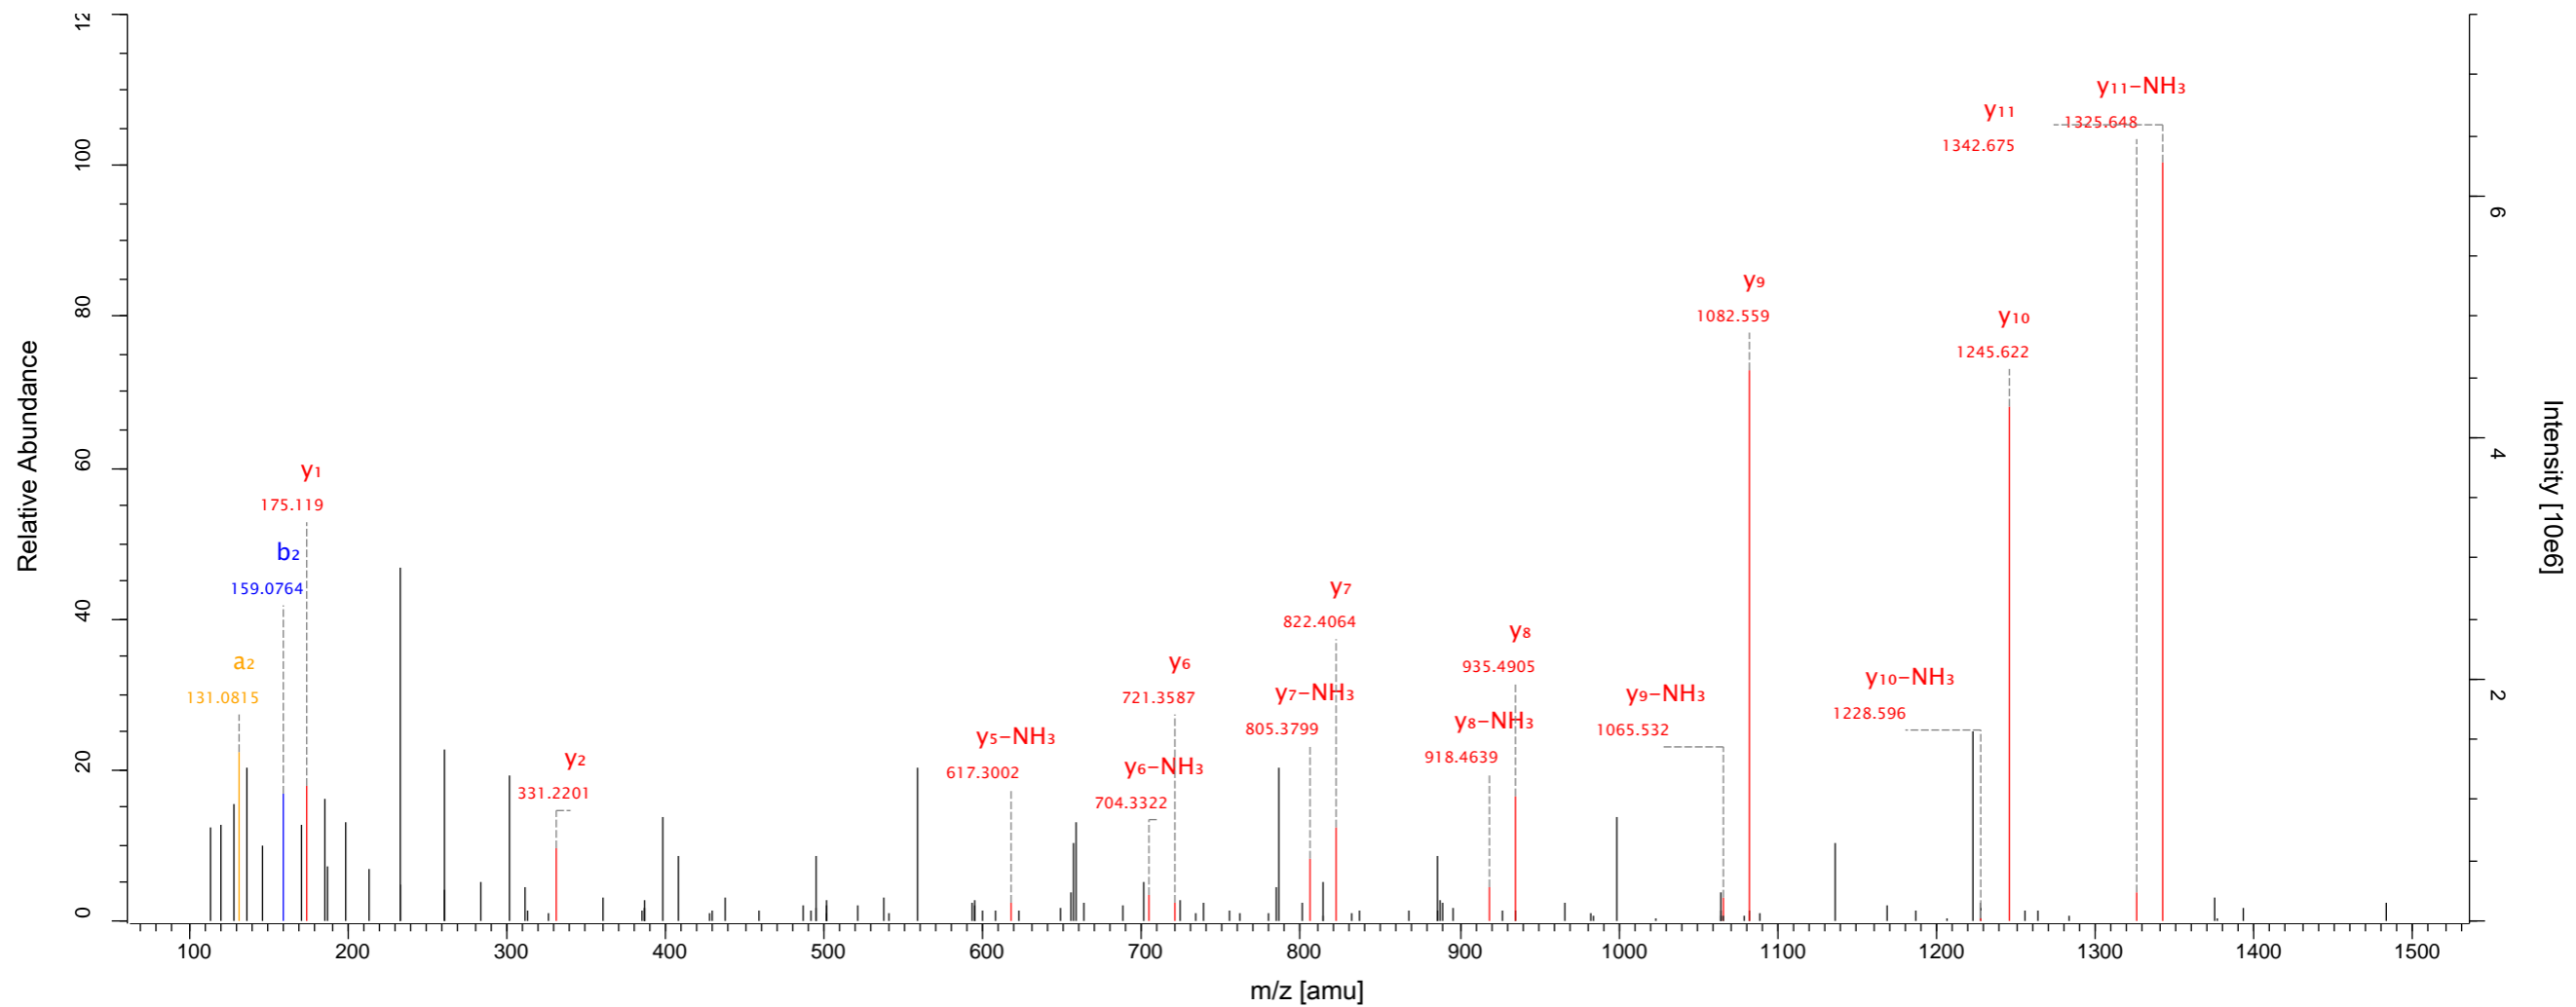

Raw file: 20111212\_EXQ5\_AnMi\_QC\_HCMVp11\_10  
Scan number: 19495  
Protein: ORFL106C - NC\_006273.2[53935,54294]- <unknown description>  
Peptide score: 76.14  
Method: FTMS; HCD

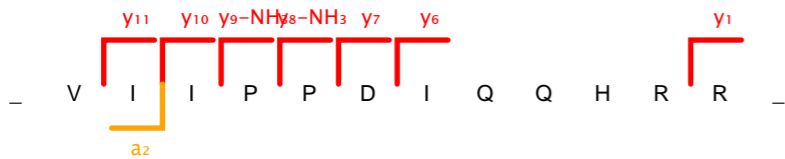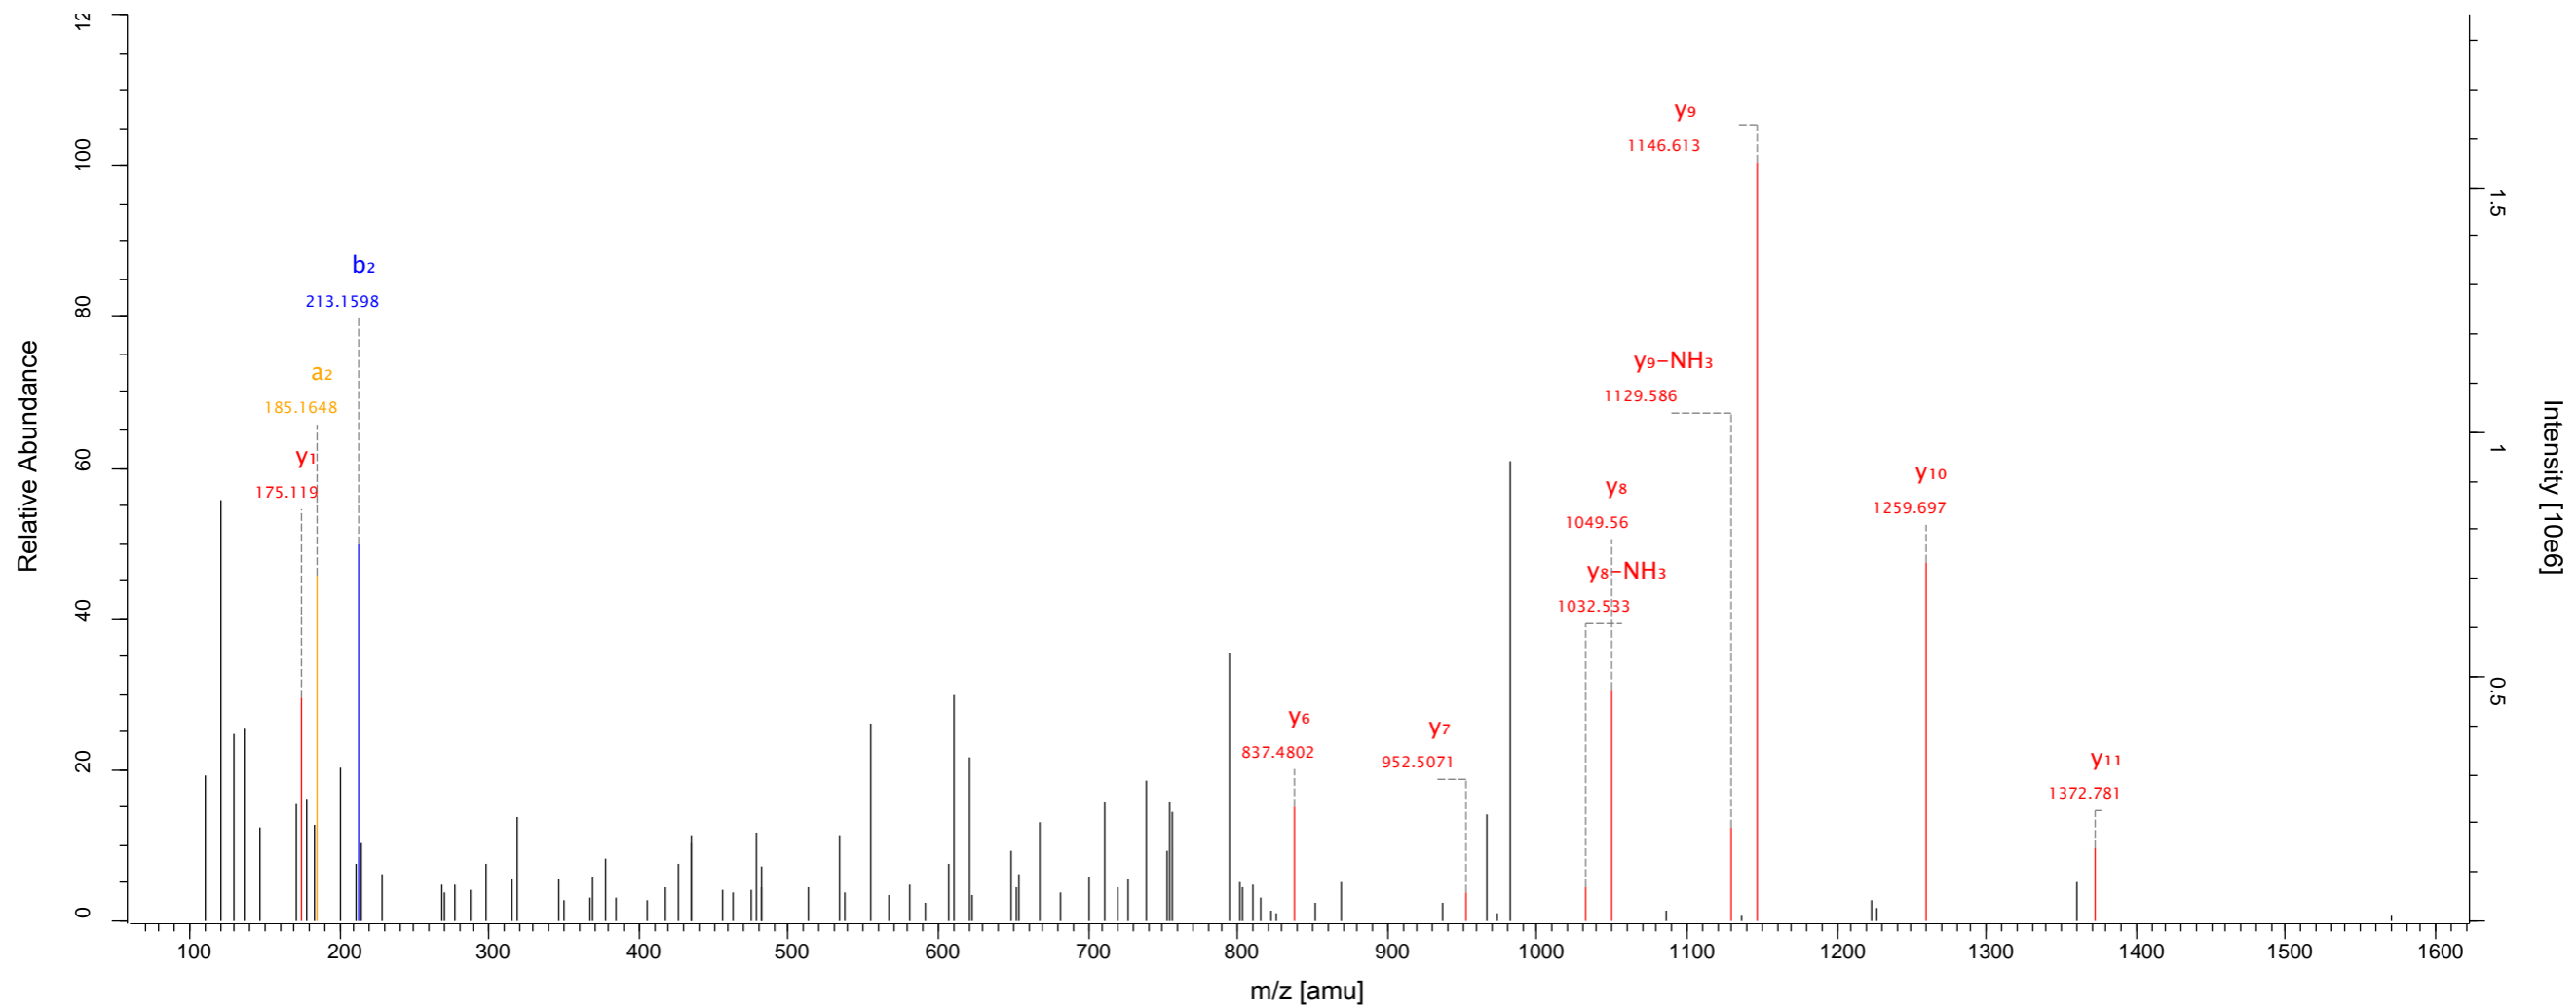

Raw file: 20111212\_EXQ5\_AnMi\_QC\_HCMVp11\_10  
Scan number: 20603  
Protein: ORFL154W + NC\_006273.2[96843,97115]+ <unknown description>; ORFL154W.iORF1 + NC\_006273.2[96972,97115]+ <unknown description>  
Peptide score: 64.3  
Method: FTMS; HCD

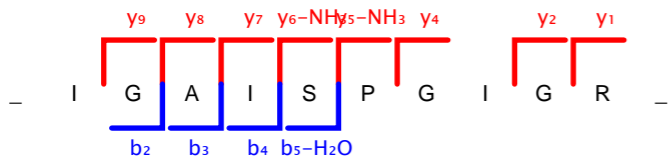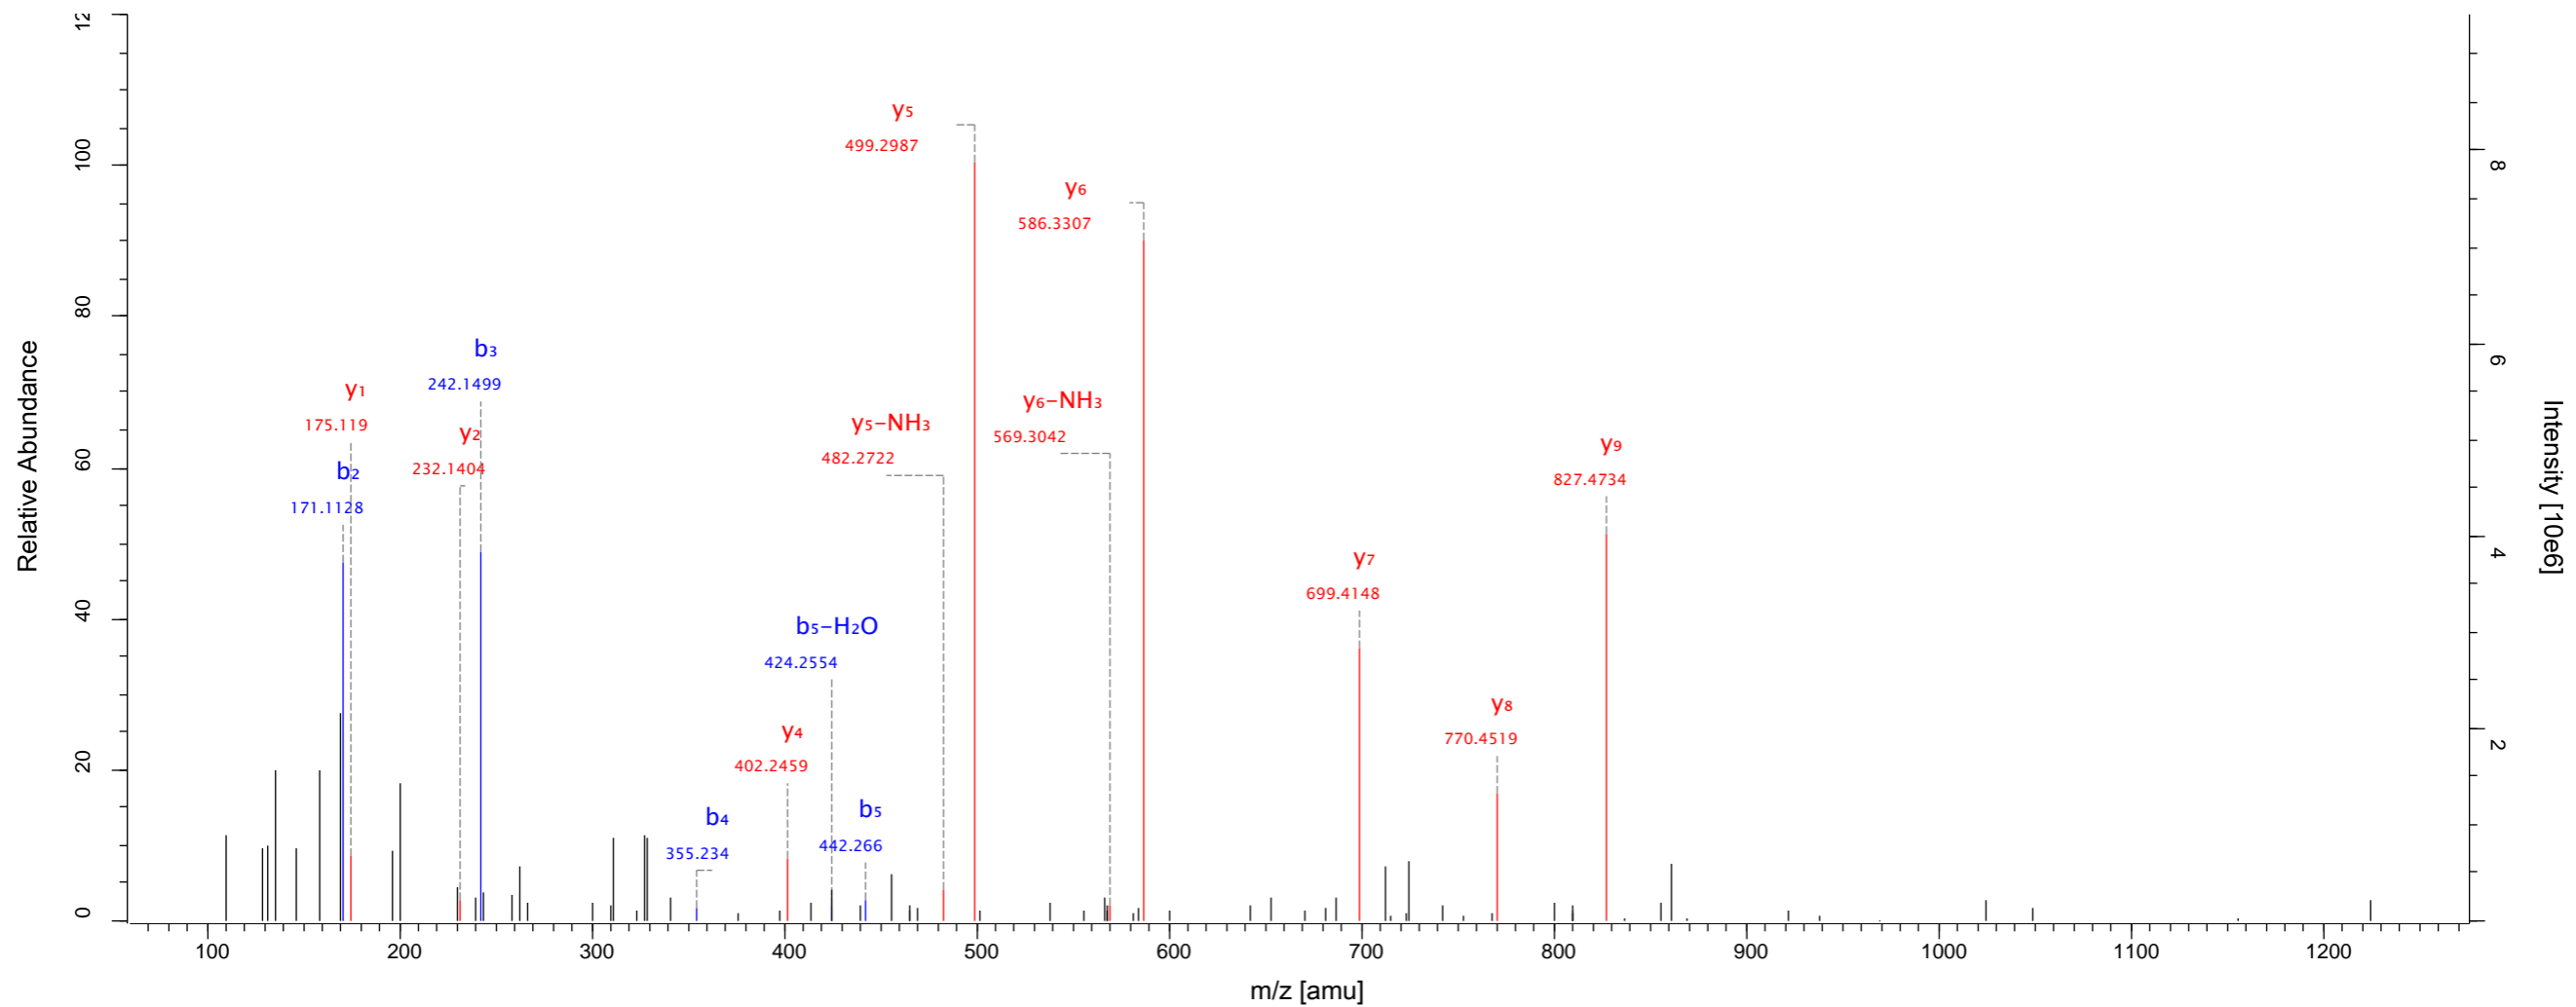

Raw file: 20111212\_EXQ5\_AnMi\_QC\_HCMVp11\_10  
Scan number: 22274  
Protein: ORFL185C - NC\_006273.2[111134,111490]- <unknown description>; ORFL184C.iORF3 - NC\_006273.2[111134,111379]- <unknown description>  
Peptide score: 76.73  
Method: FTMS; HCD

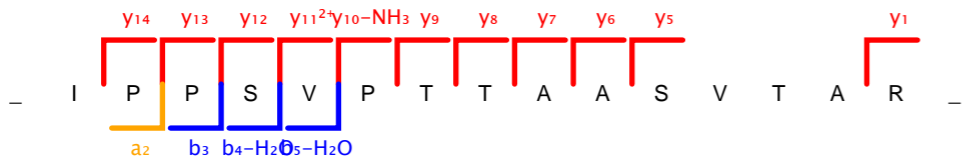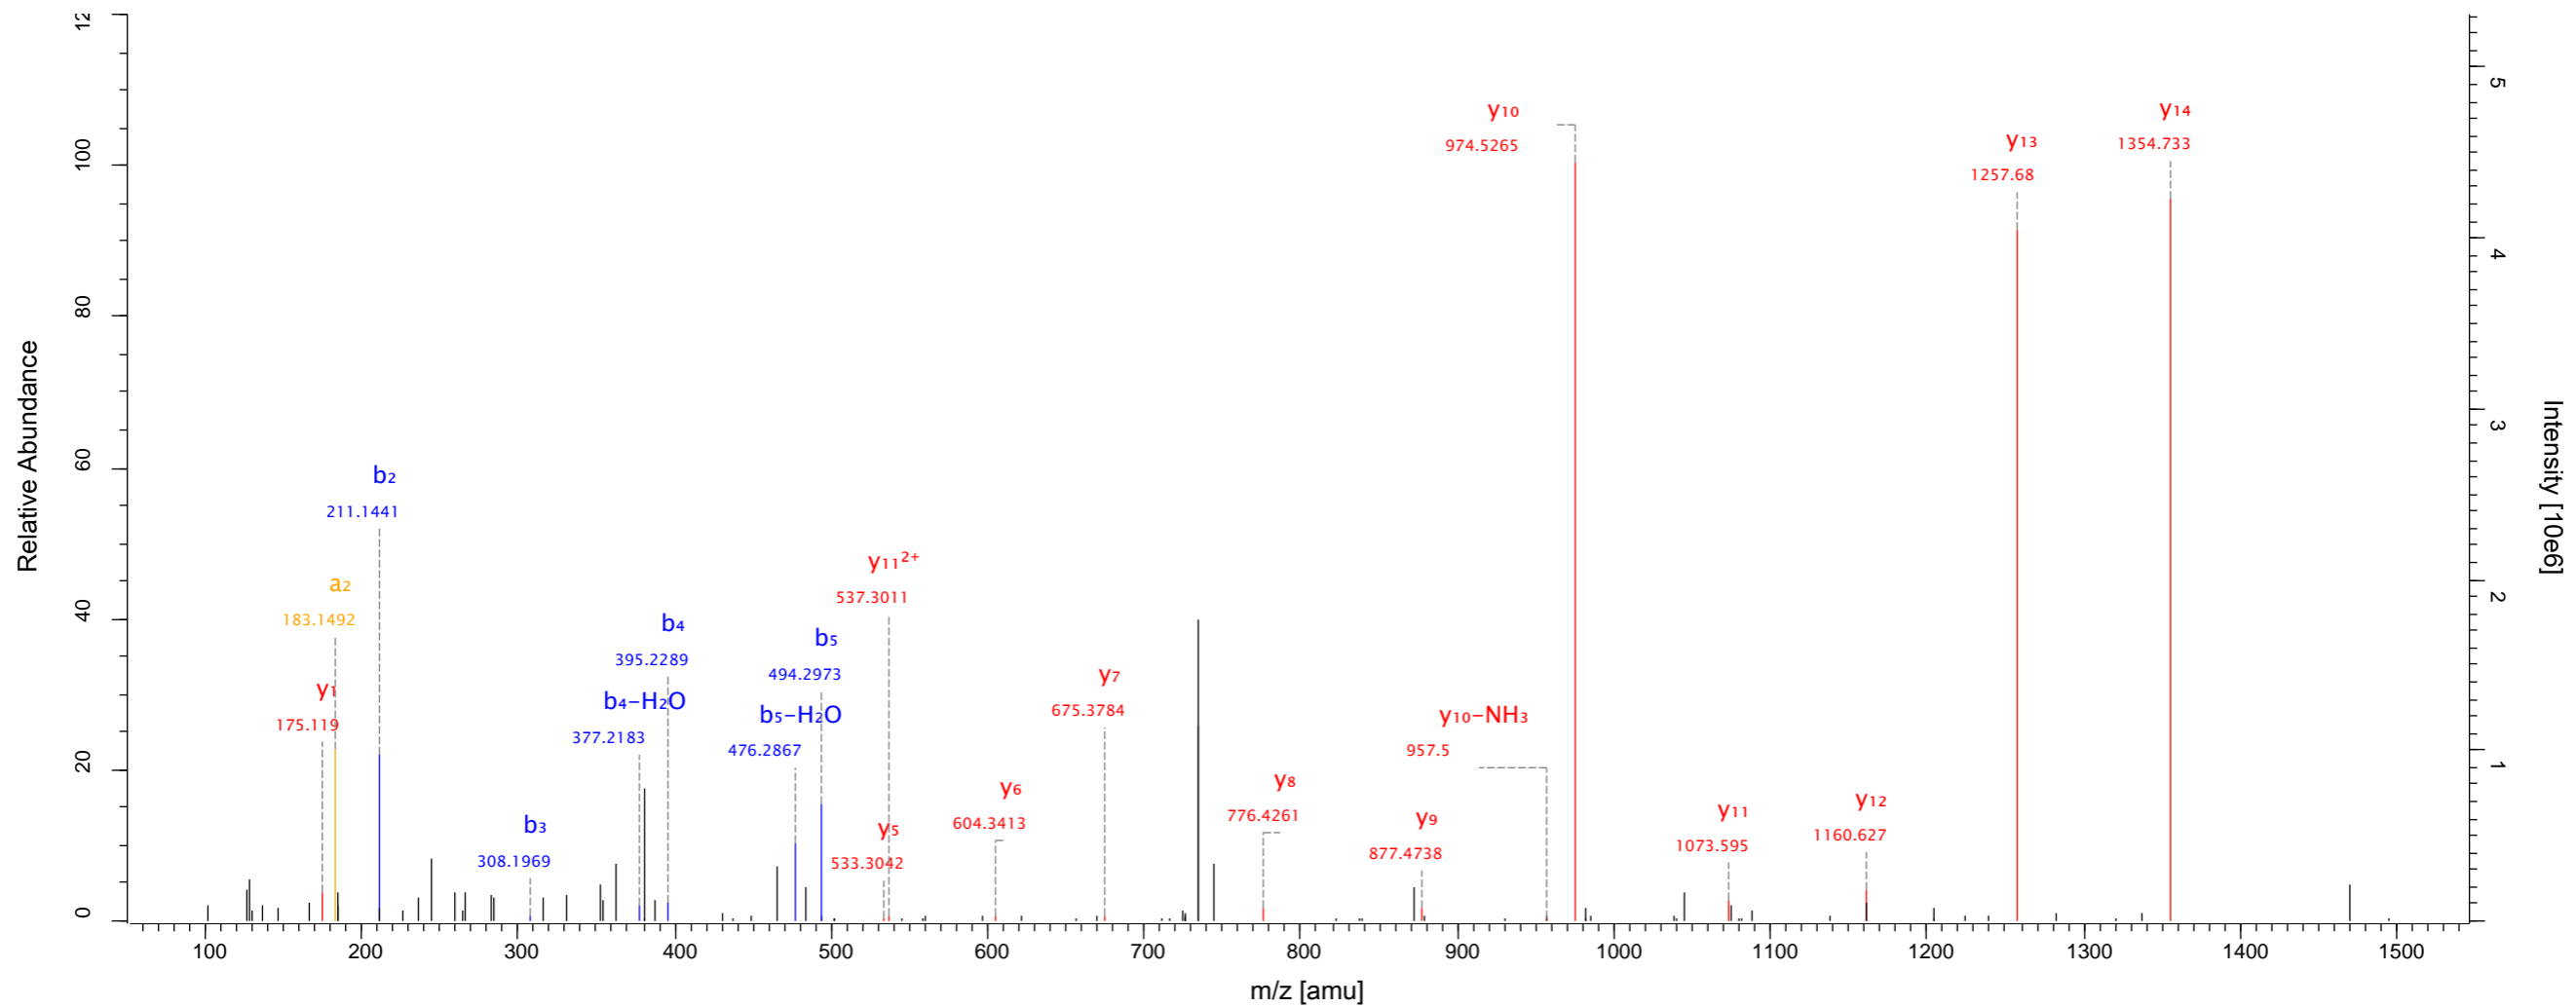



Raw file: 20111212\_EXQ5\_AnMi\_QC\_HCMVp1\_10  
Scan number: 25634  
Protein: ORFL234C - NC\_006273.2[148754,149149]- <unknown description>  
Peptide score: 166.78  
Method: FTMS; HCD

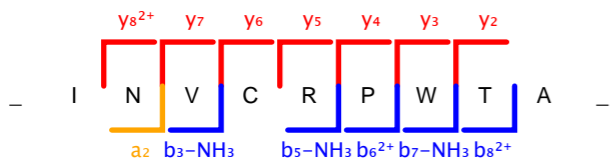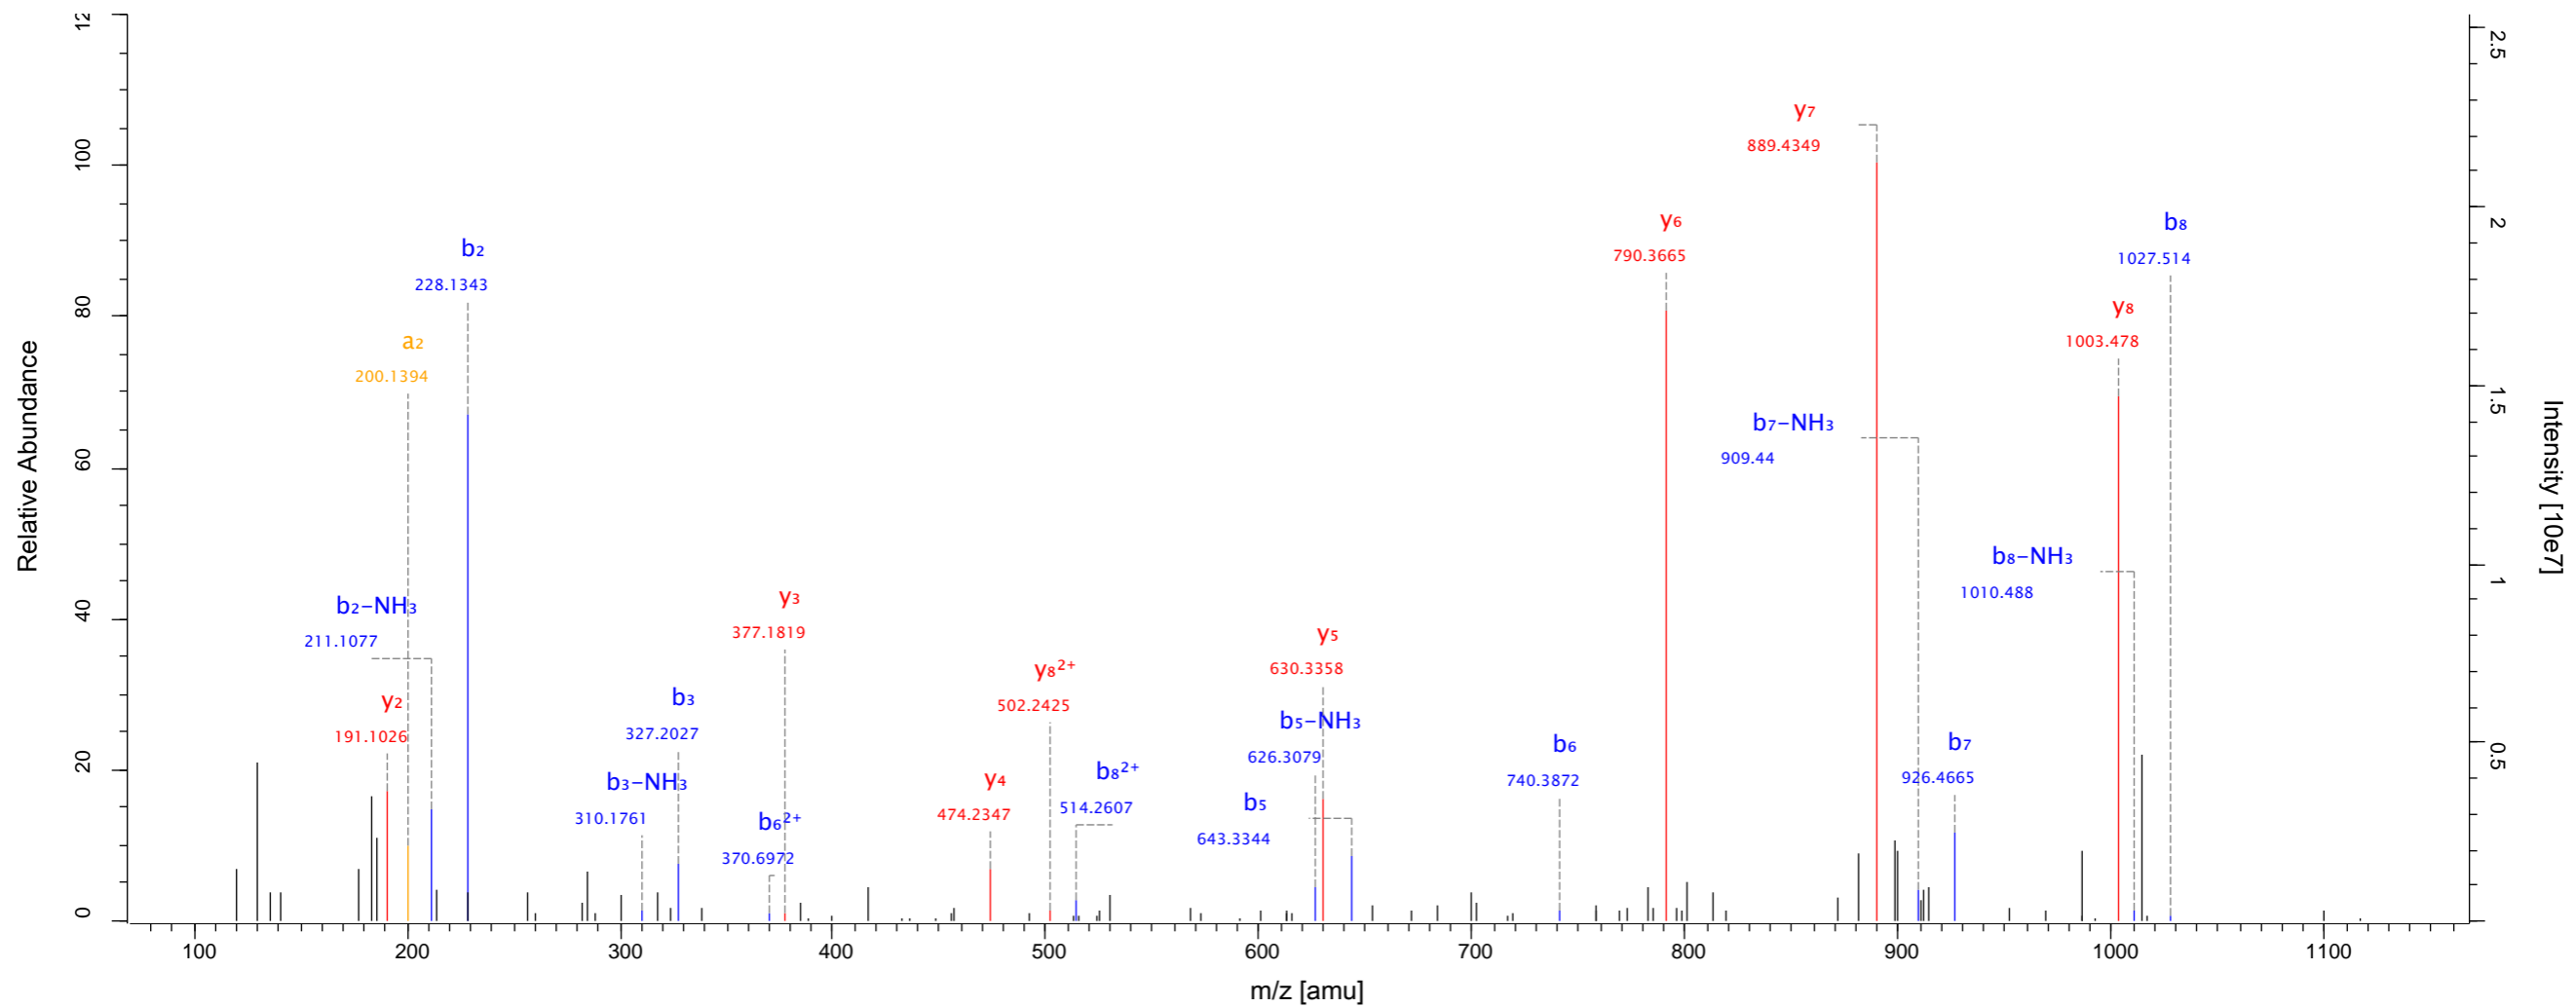

Raw file: 20111212\_EXQ5\_AnMi\_QC\_HCMVp1\_10  
 Scan number: 26093  
 Protein: ORFS343C.iORF1 - NC\_006273.2[210869,211213]- <unknown description>  
 Peptide score: 199.11  
 Method: FTMS; HCD

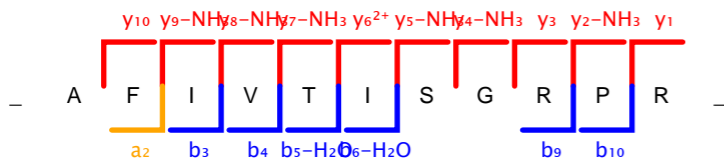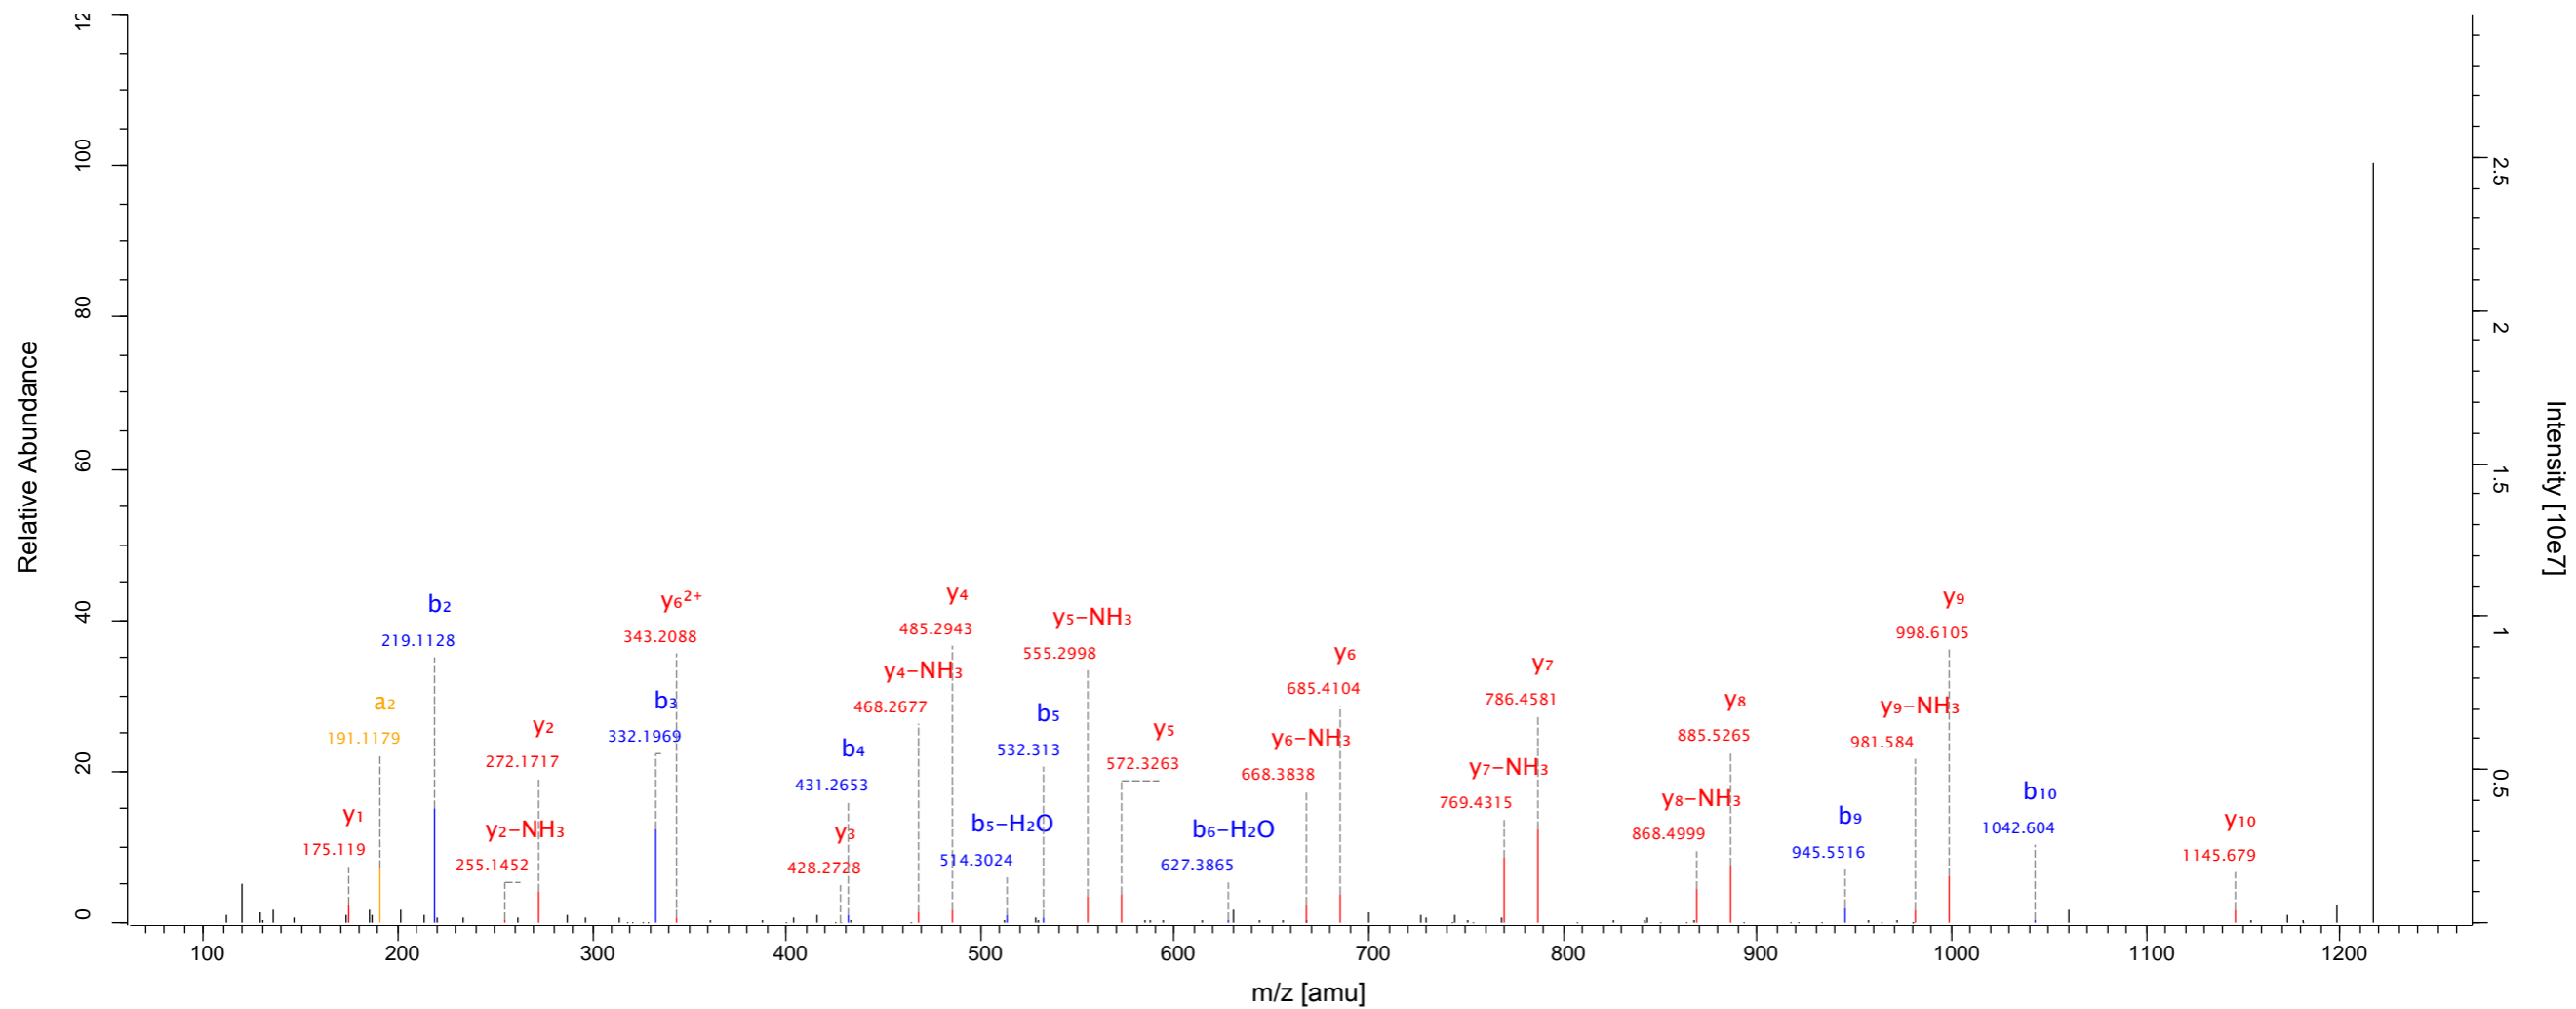

Raw file: 20111212\_EXQ5\_AnMi\_QC\_HCMVp11\_10  
Scan number: 26187  
Protein: ORFL19W + NC\_006273.2[8136,8387]+ <unknown description>  
Peptide score: 78.93  
Method: FTMS; HCD

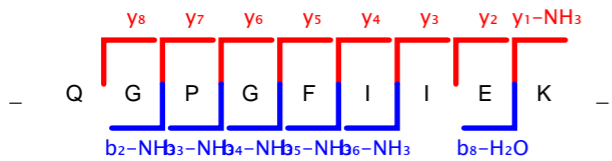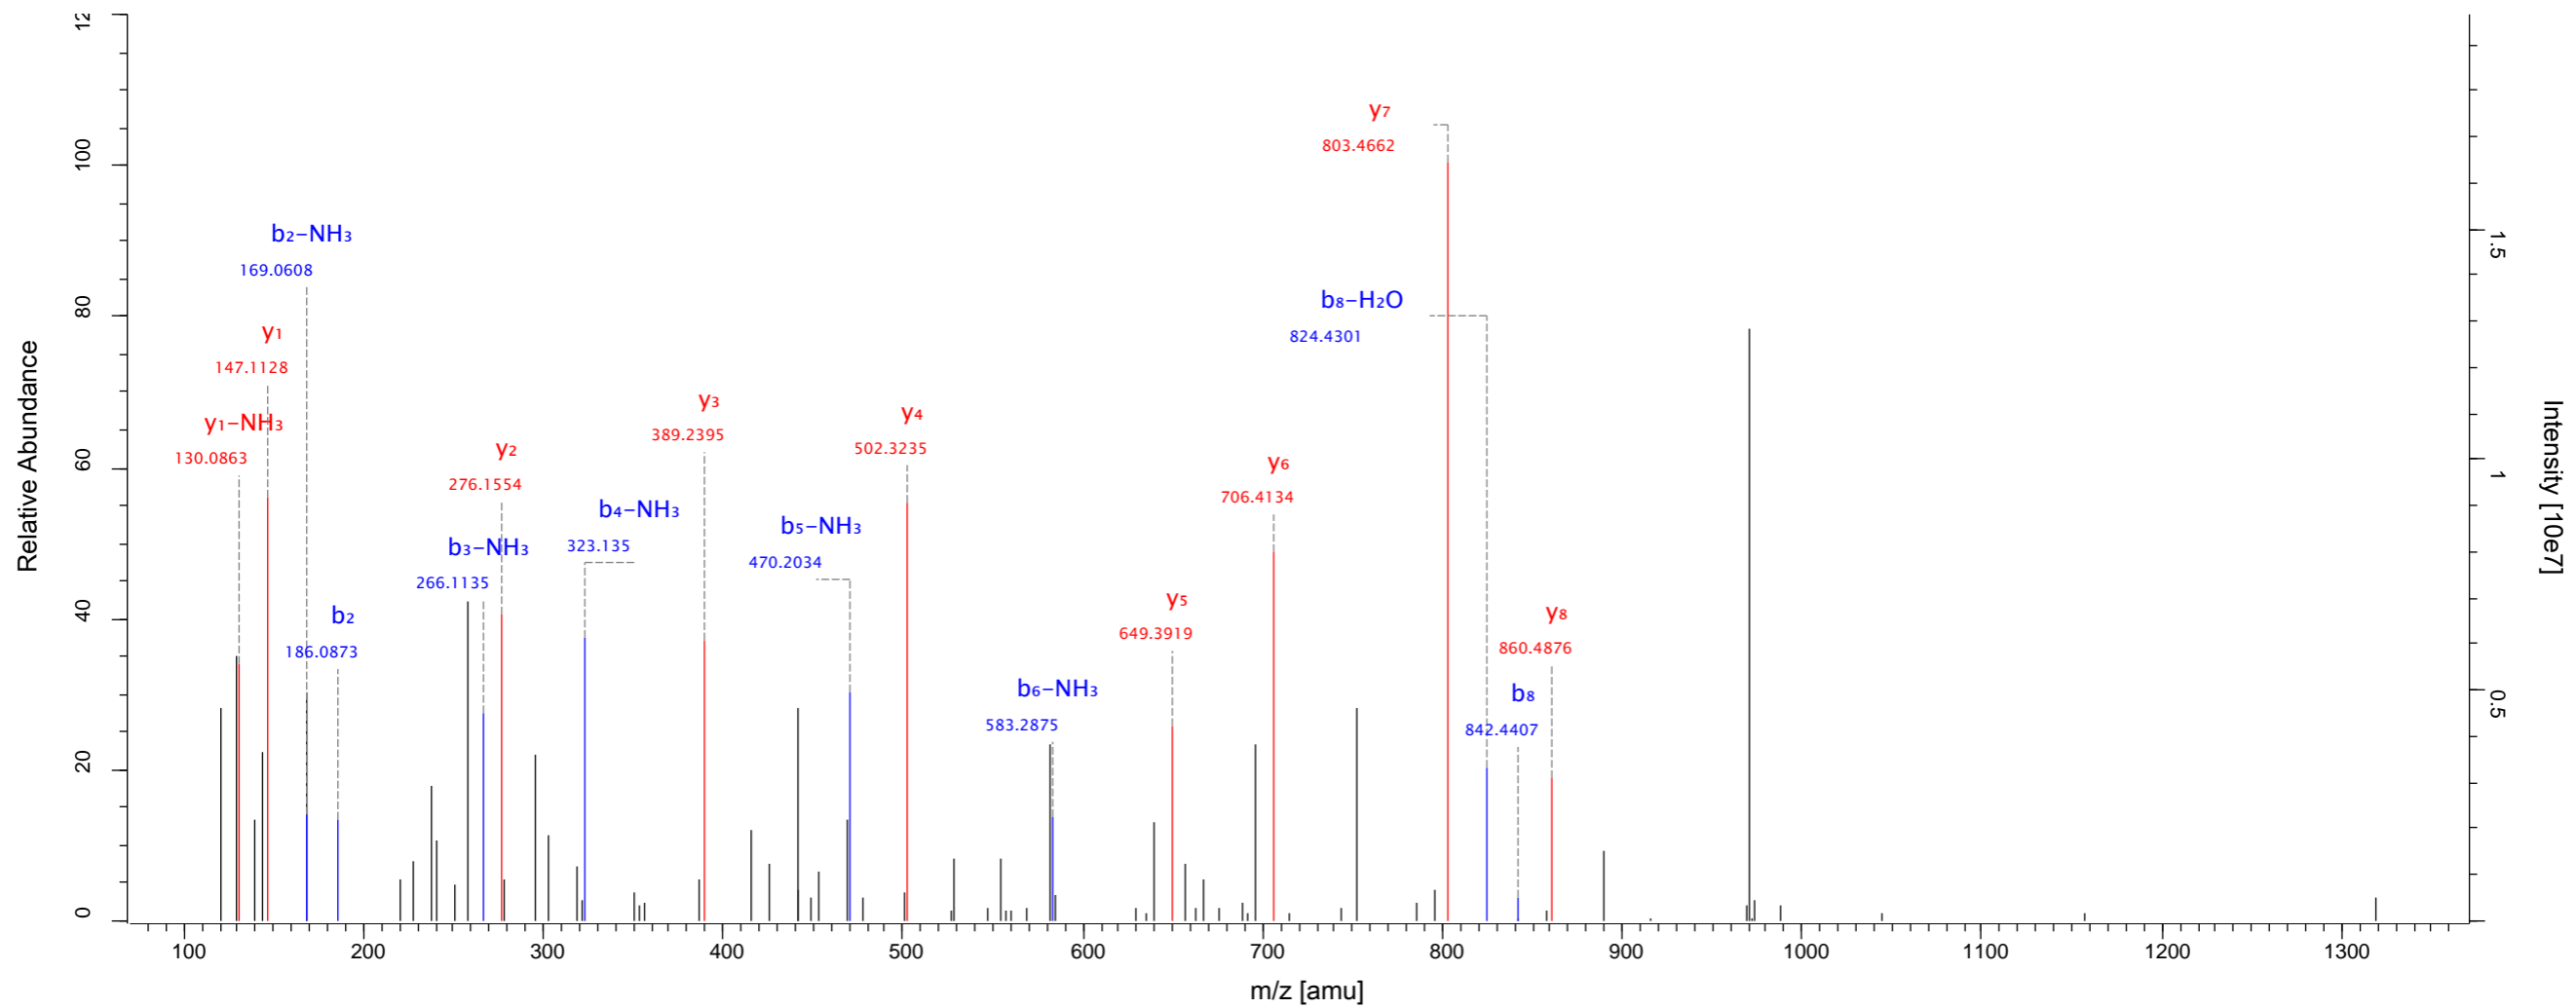

Raw file: 20111212\_EXQ5\_AnMi\_QC\_HCMVp1\_10  
Scan number: 26311  
Protein: ORFL174C.iORF1 - NC\_006273.2[106302,106568]- <unknown description>  
Peptide score: 89.3  
Method: FTMS; HCD

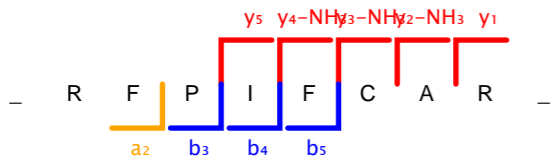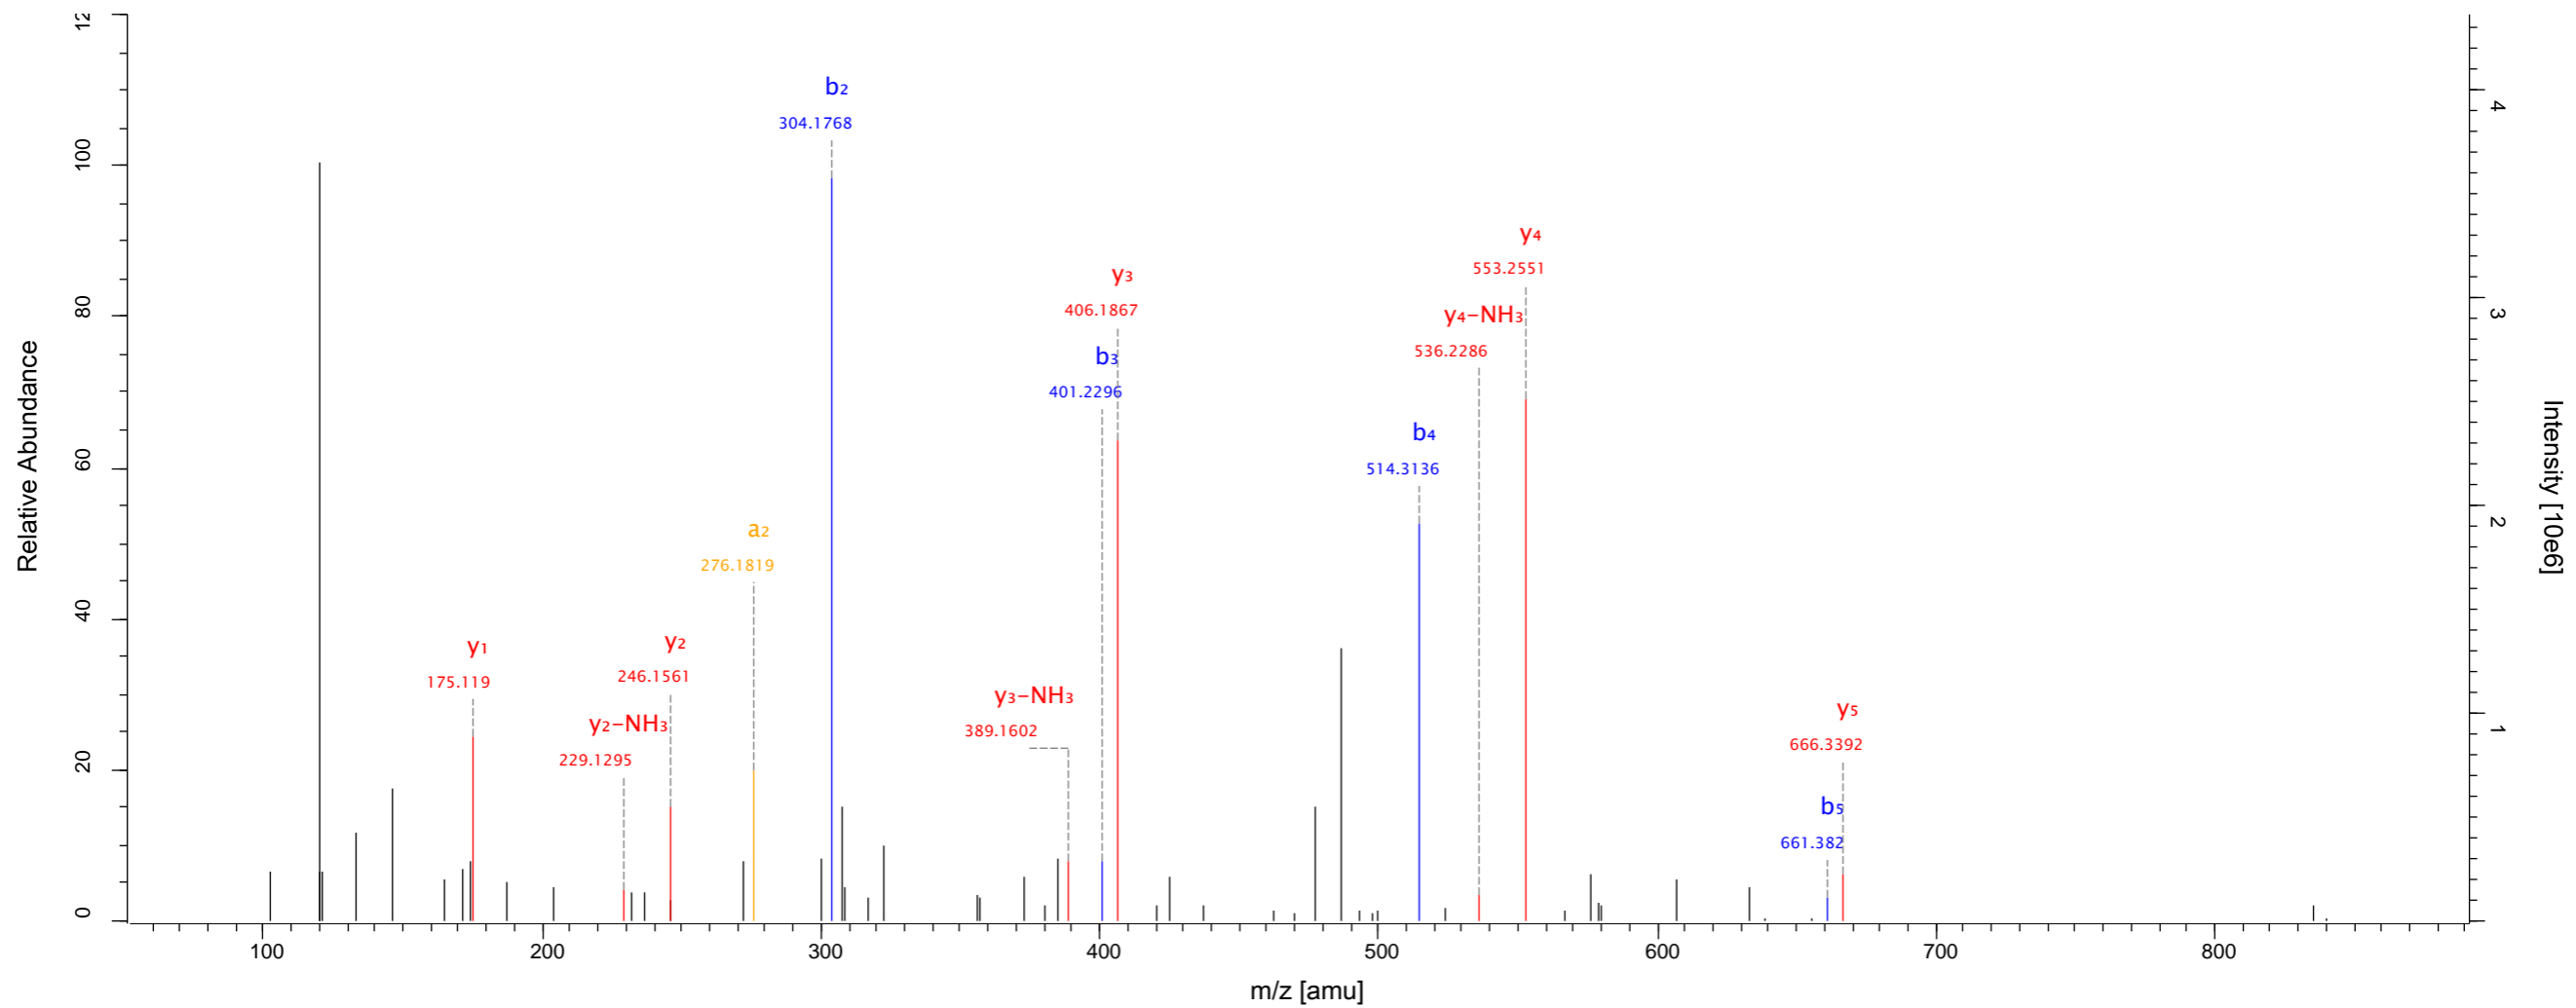

Raw file: 20111212\_EXQ5\_AnMi\_QC\_HCMVp1\_10  
Scan number: 27548  
Protein: ORFL151C - NC\_006273.2[92499,92870]- <unknown description>  
Peptide score: 136.57  
Method: FTMS; HCD

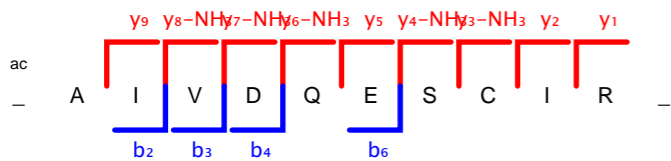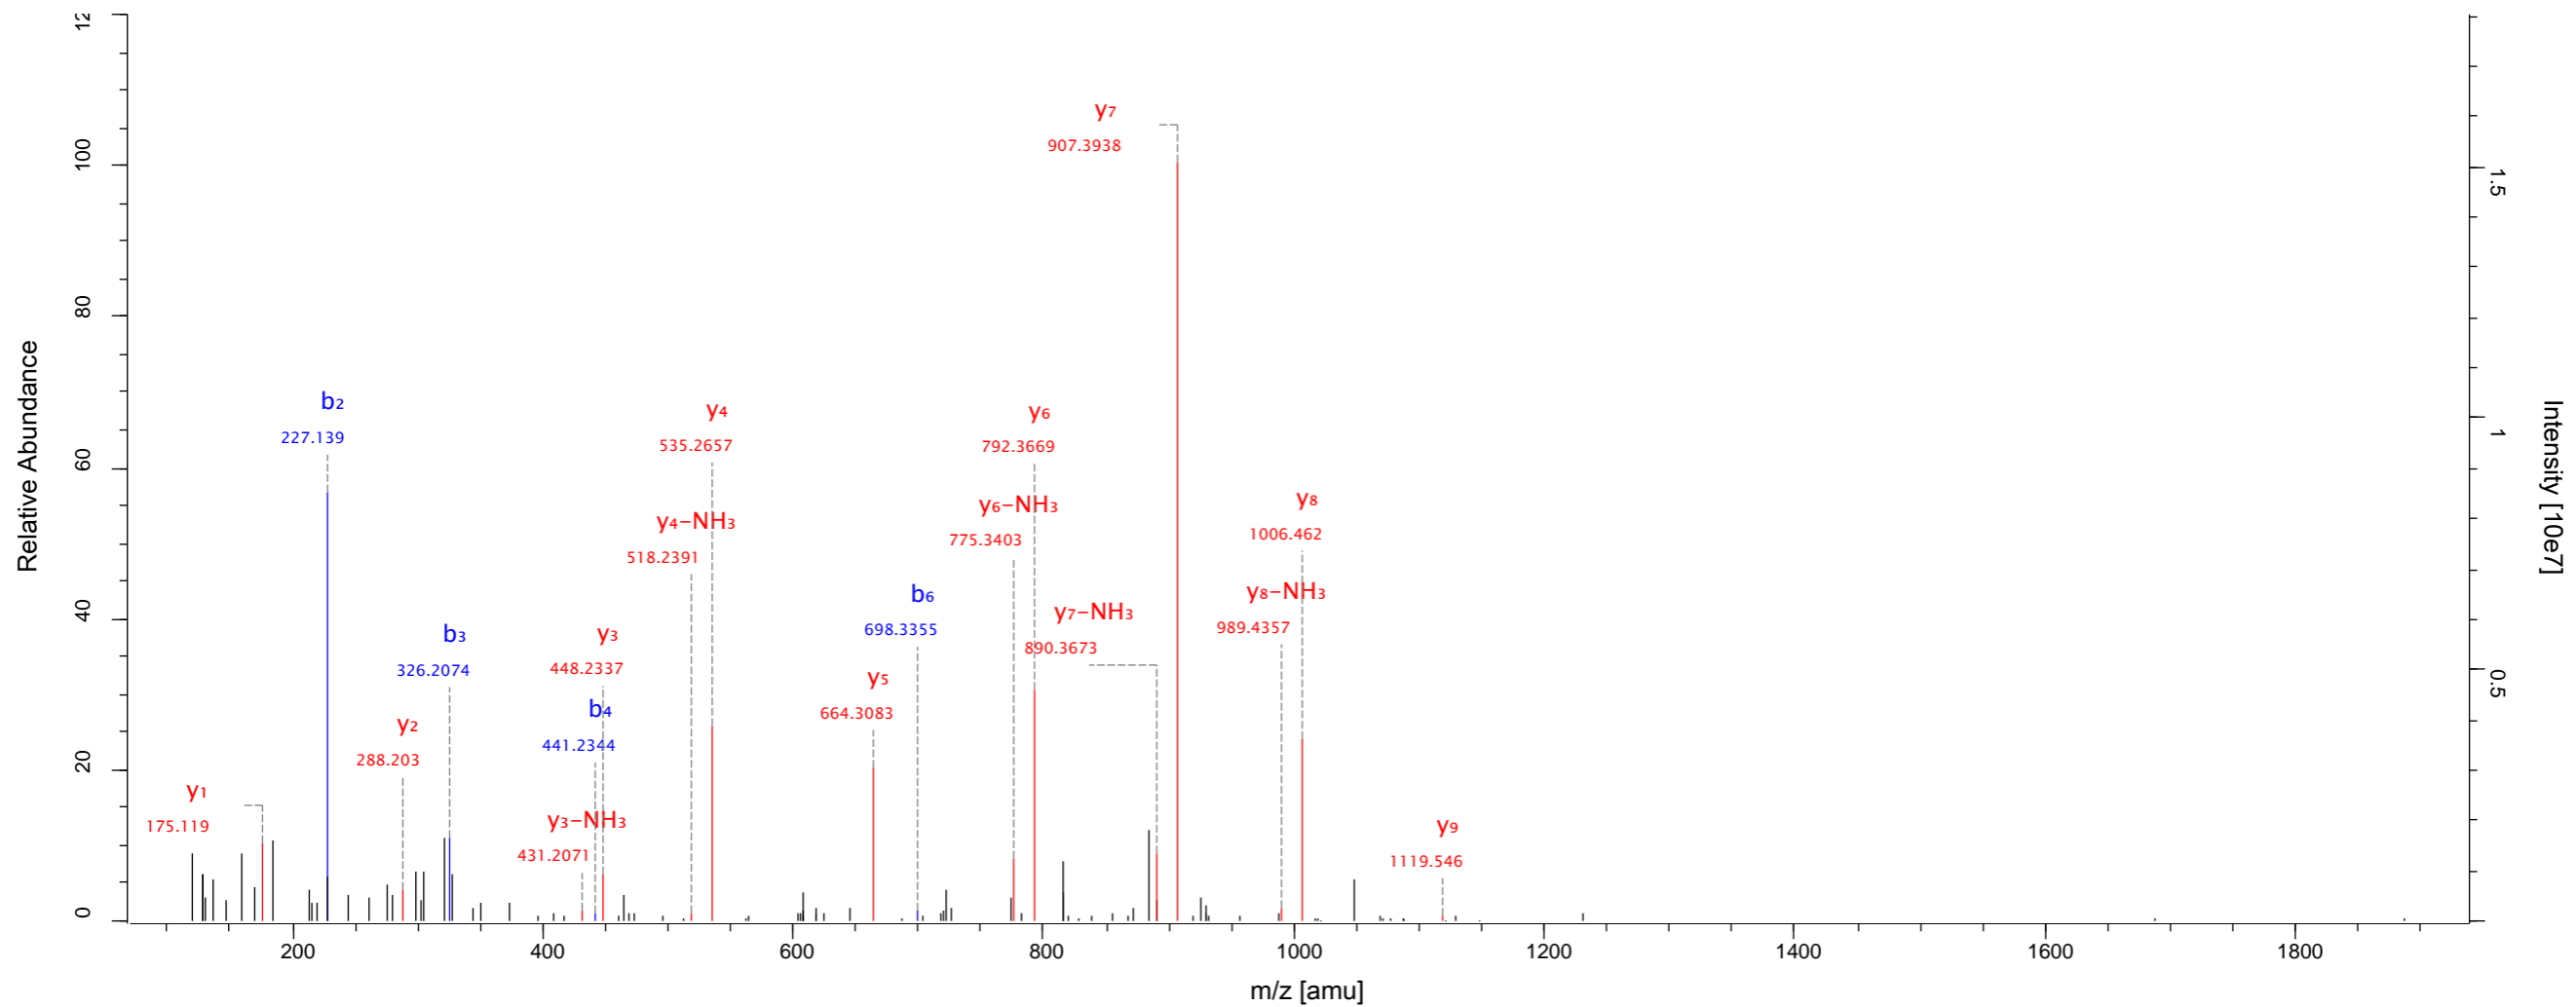

Raw file: 20111212\_EXQ5\_AnMi\_QC\_HCMVp1\_10  
Scan number: 29560  
Protein: ORFL151C - NC\_006273.2[92499,92870]- <unknown description>  
Peptide score: 119.25  
Method: FTMS; HCD

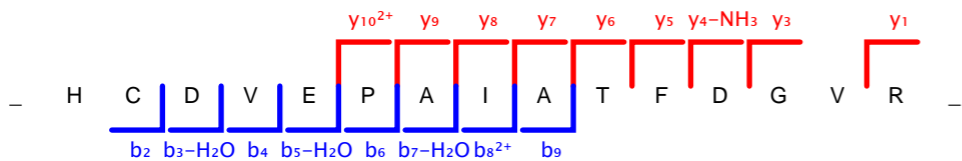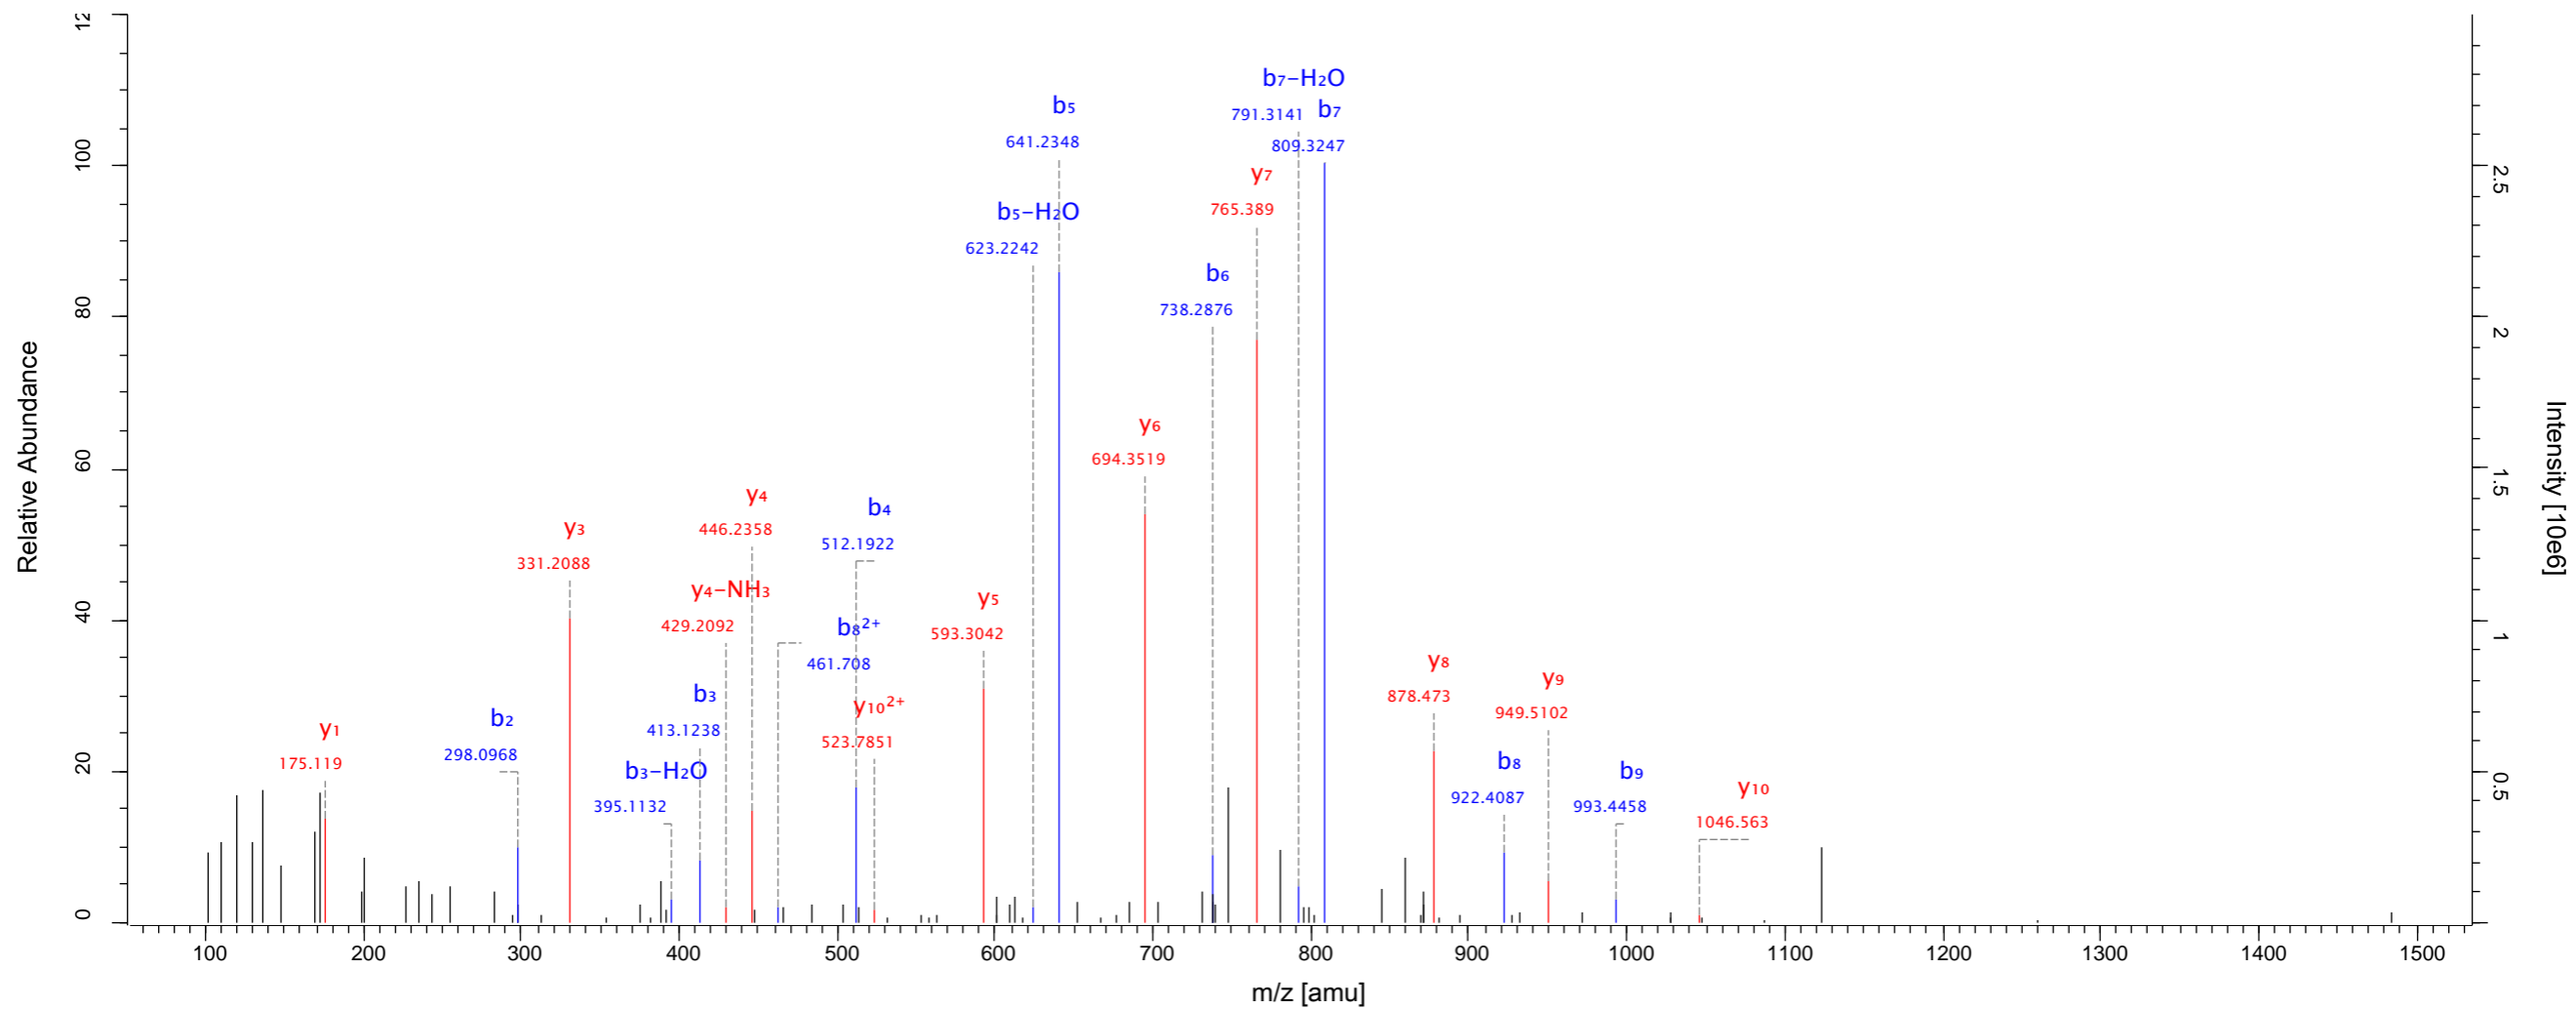

Raw file: 20111212\_EXQ5\_AnMi\_QC\_HCMVp1\_10  
 Scan number: 29616  
 Protein: ORFL237C - NC\_006273.2[149340,149699]- <unknown description>  
 Peptide score: 258.85  
 Method: FTMS; HCD

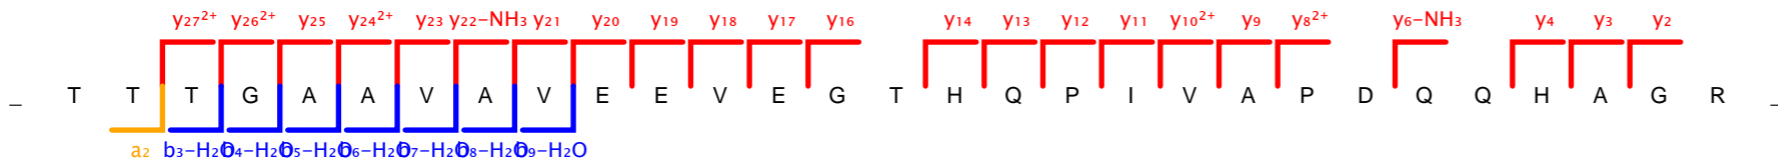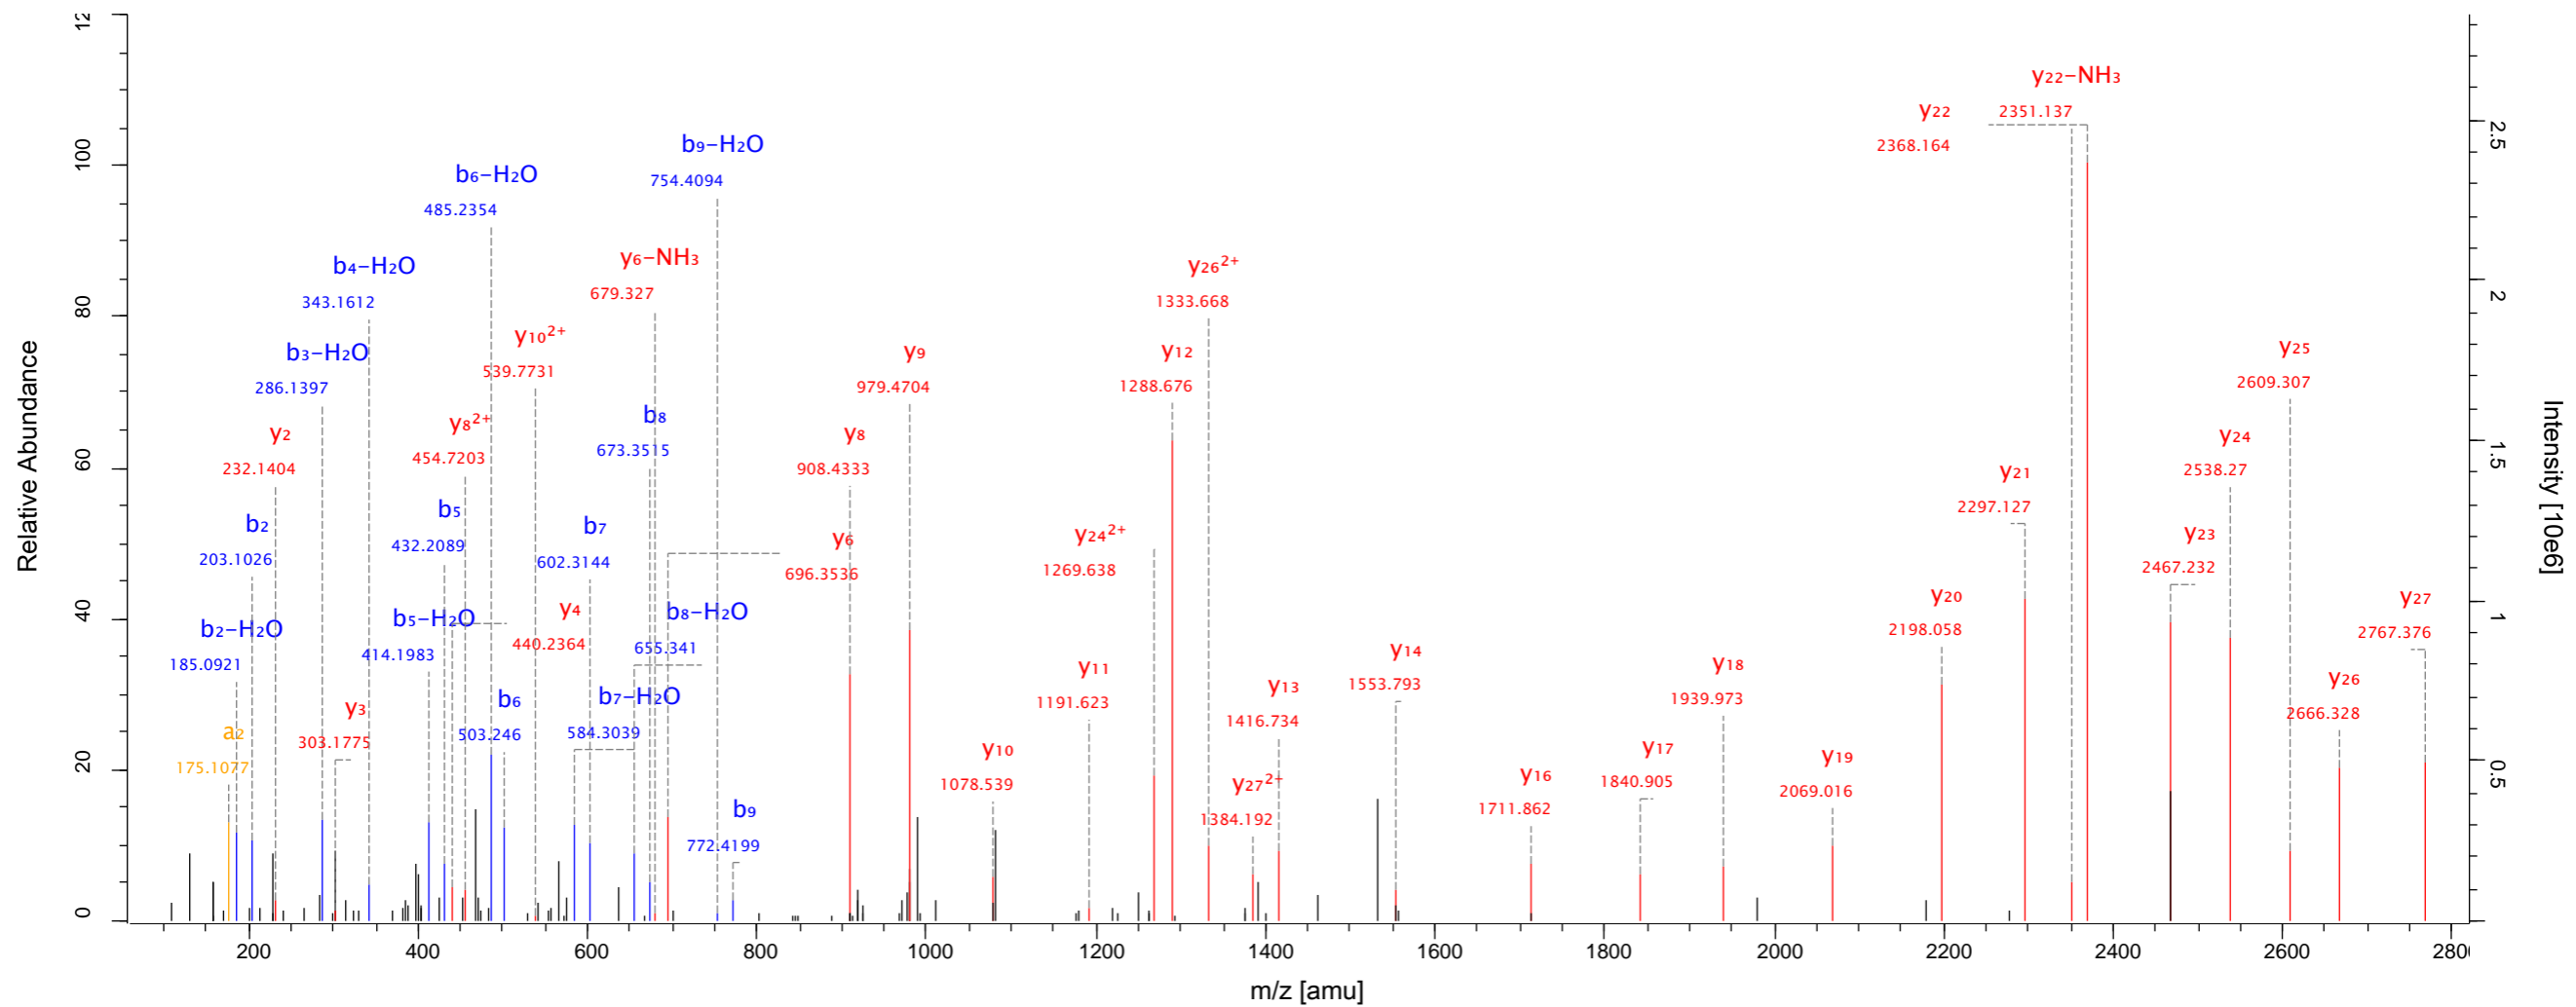

Raw file: 20111212\_EXQ5\_AnMi\_QC\_HCMVp11\_10  
Scan number: 30033  
Protein: ORFS343C.iORF1 - NC\_006273.2[210869,211213]- <unknown description>  
Peptide score: 65.72  
Method: FTMS; HCD

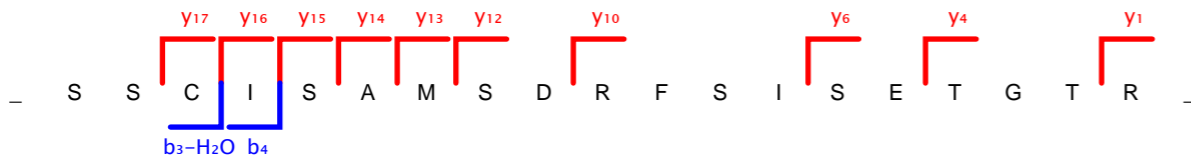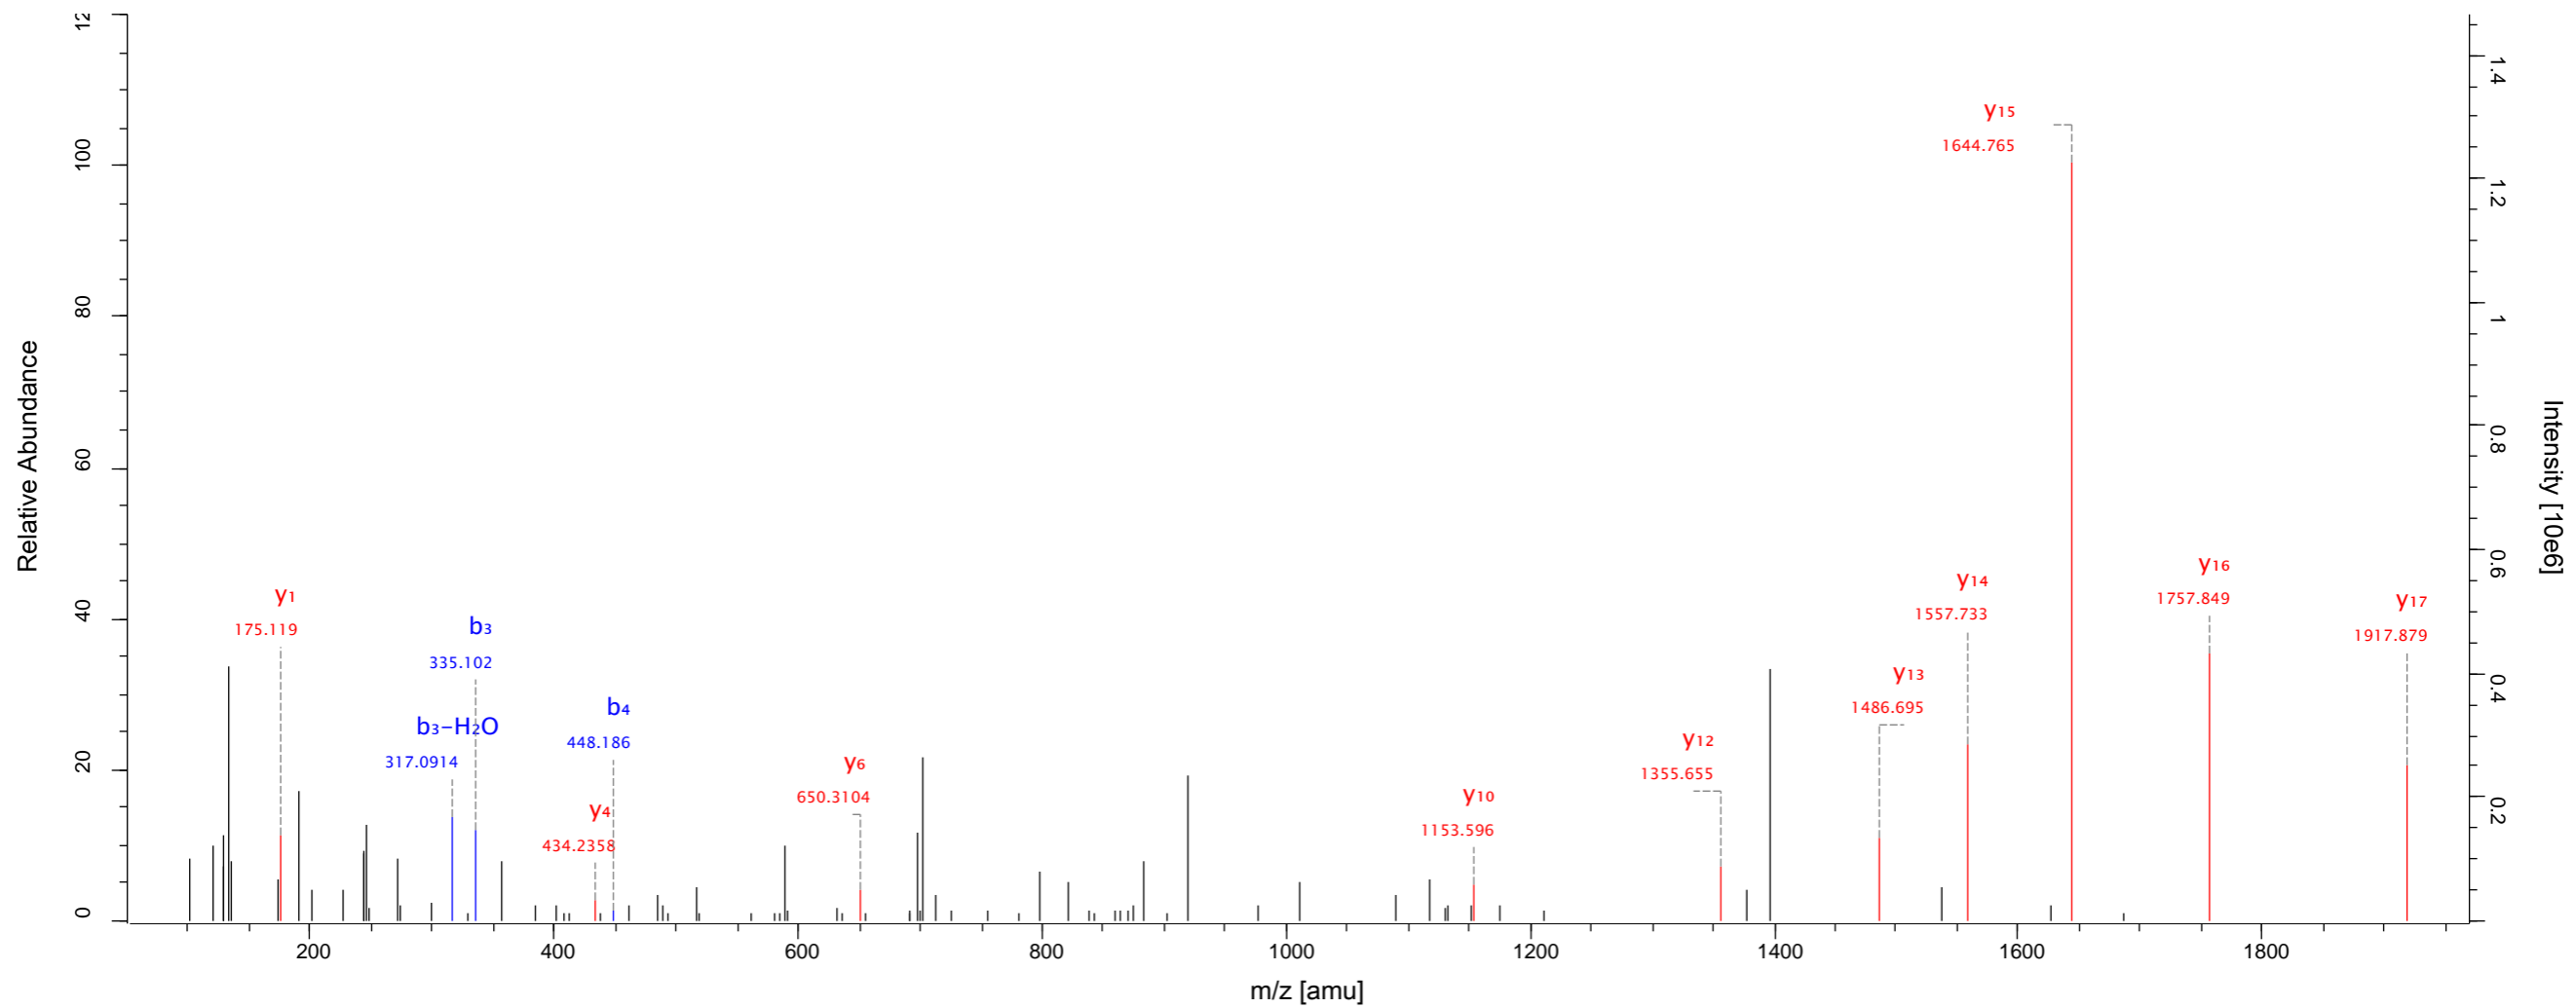



Raw file: 20111212\_EXQ5\_AnMi\_QC\_HCMVpI1\_10  
Scan number: 32268  
Protein: ORFL223W + NC\_006273.2[139458,139730]+ <unknown description>  
Peptide score: 119.41  
Method: FTMS; HCD

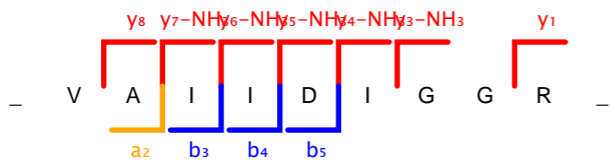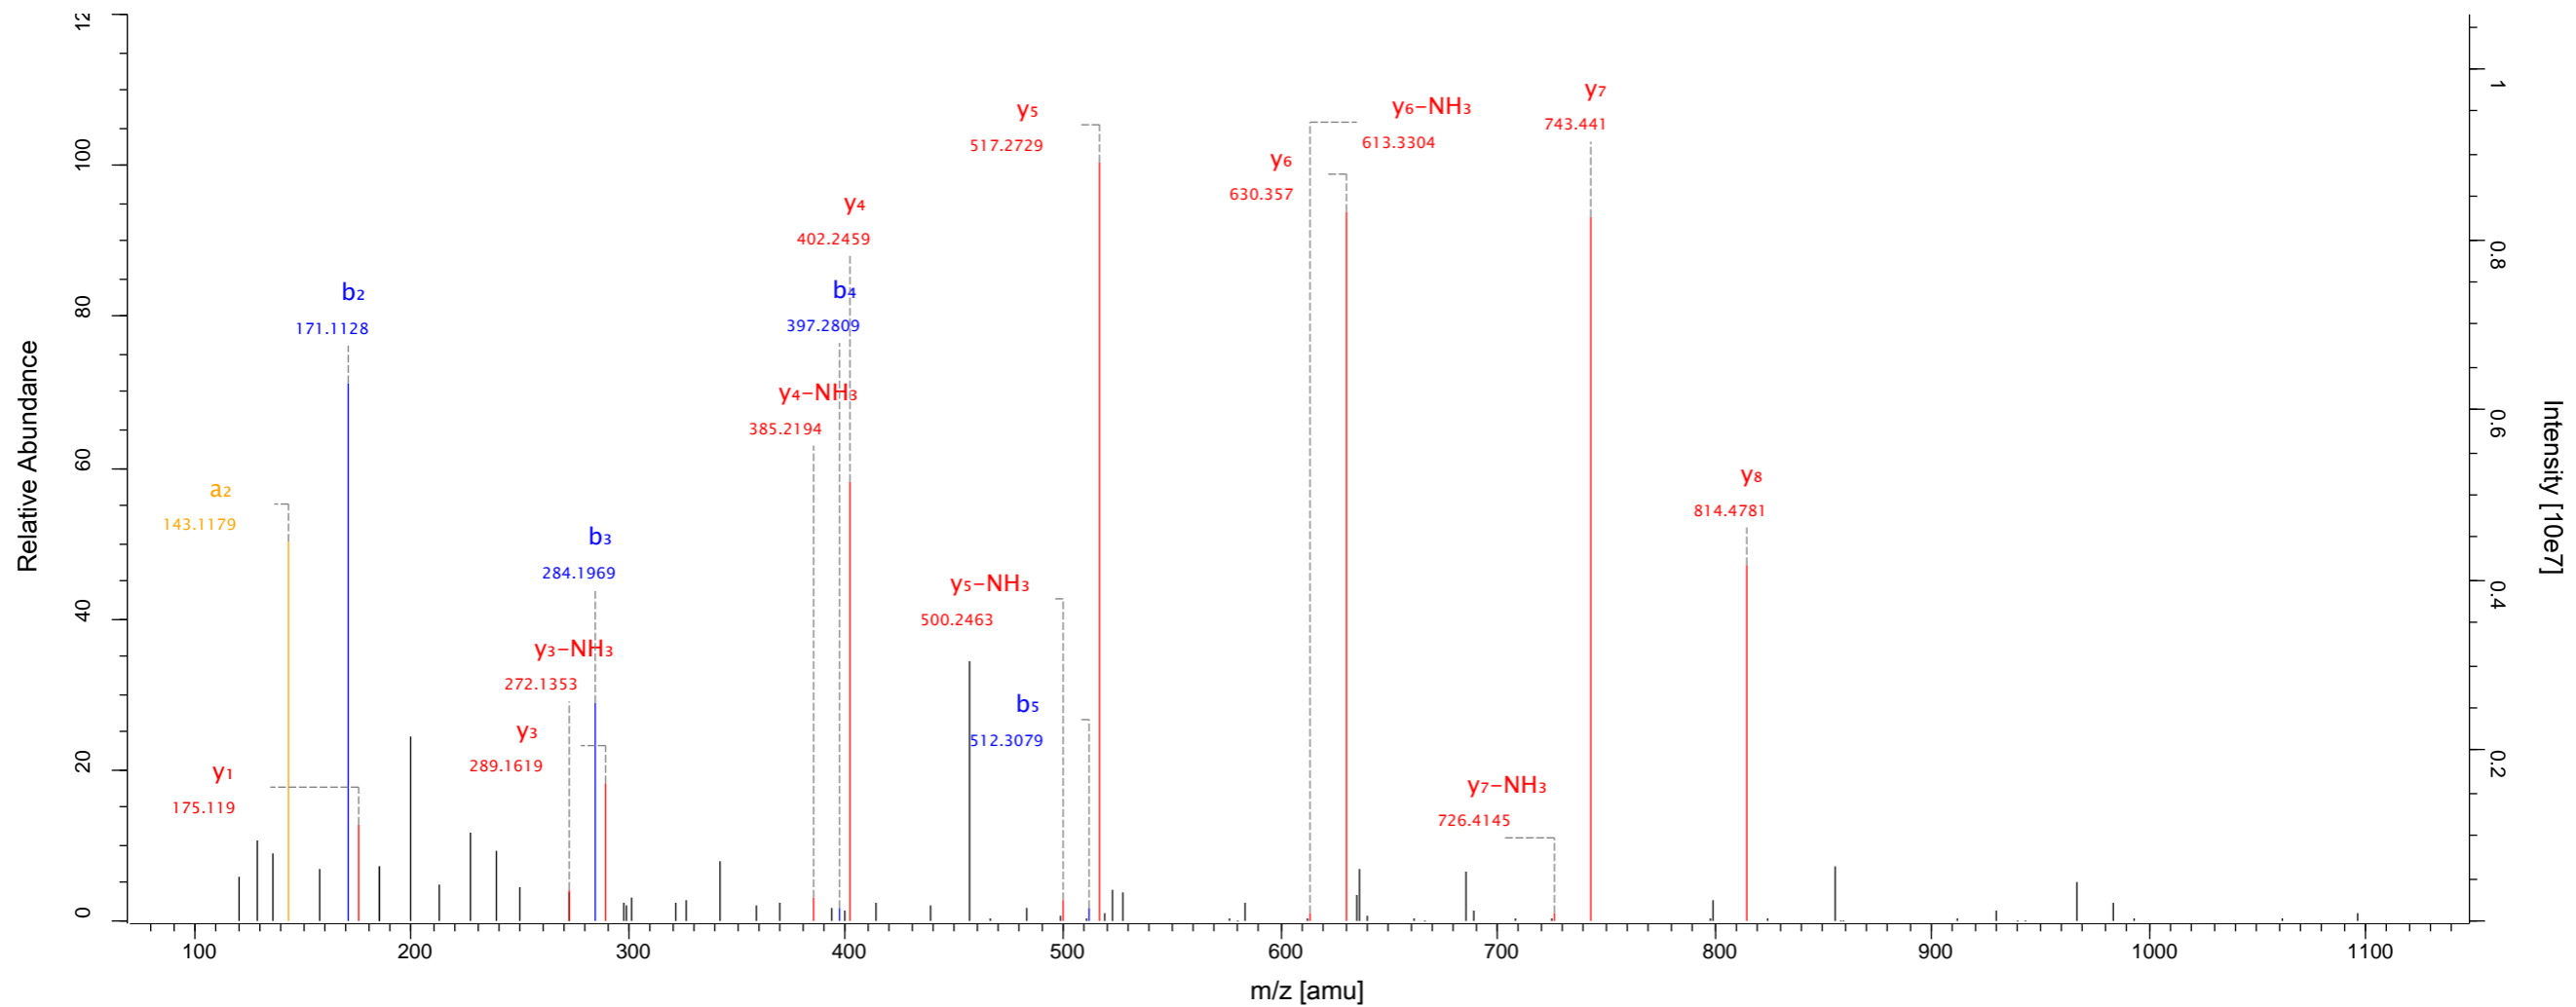

Raw file: 20111212\_EXQ5\_AnMi\_QC\_HCMVp1\_10  
Scan number: 32465  
Protein: ORFL174C.iORF1 - NC\_006273.2[106302,106568]- <unknown description>  
Peptide score: 89.7  
Method: FTMS; HCD

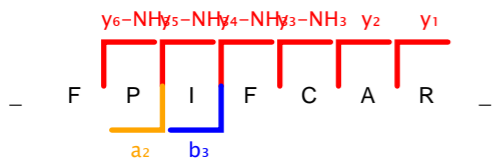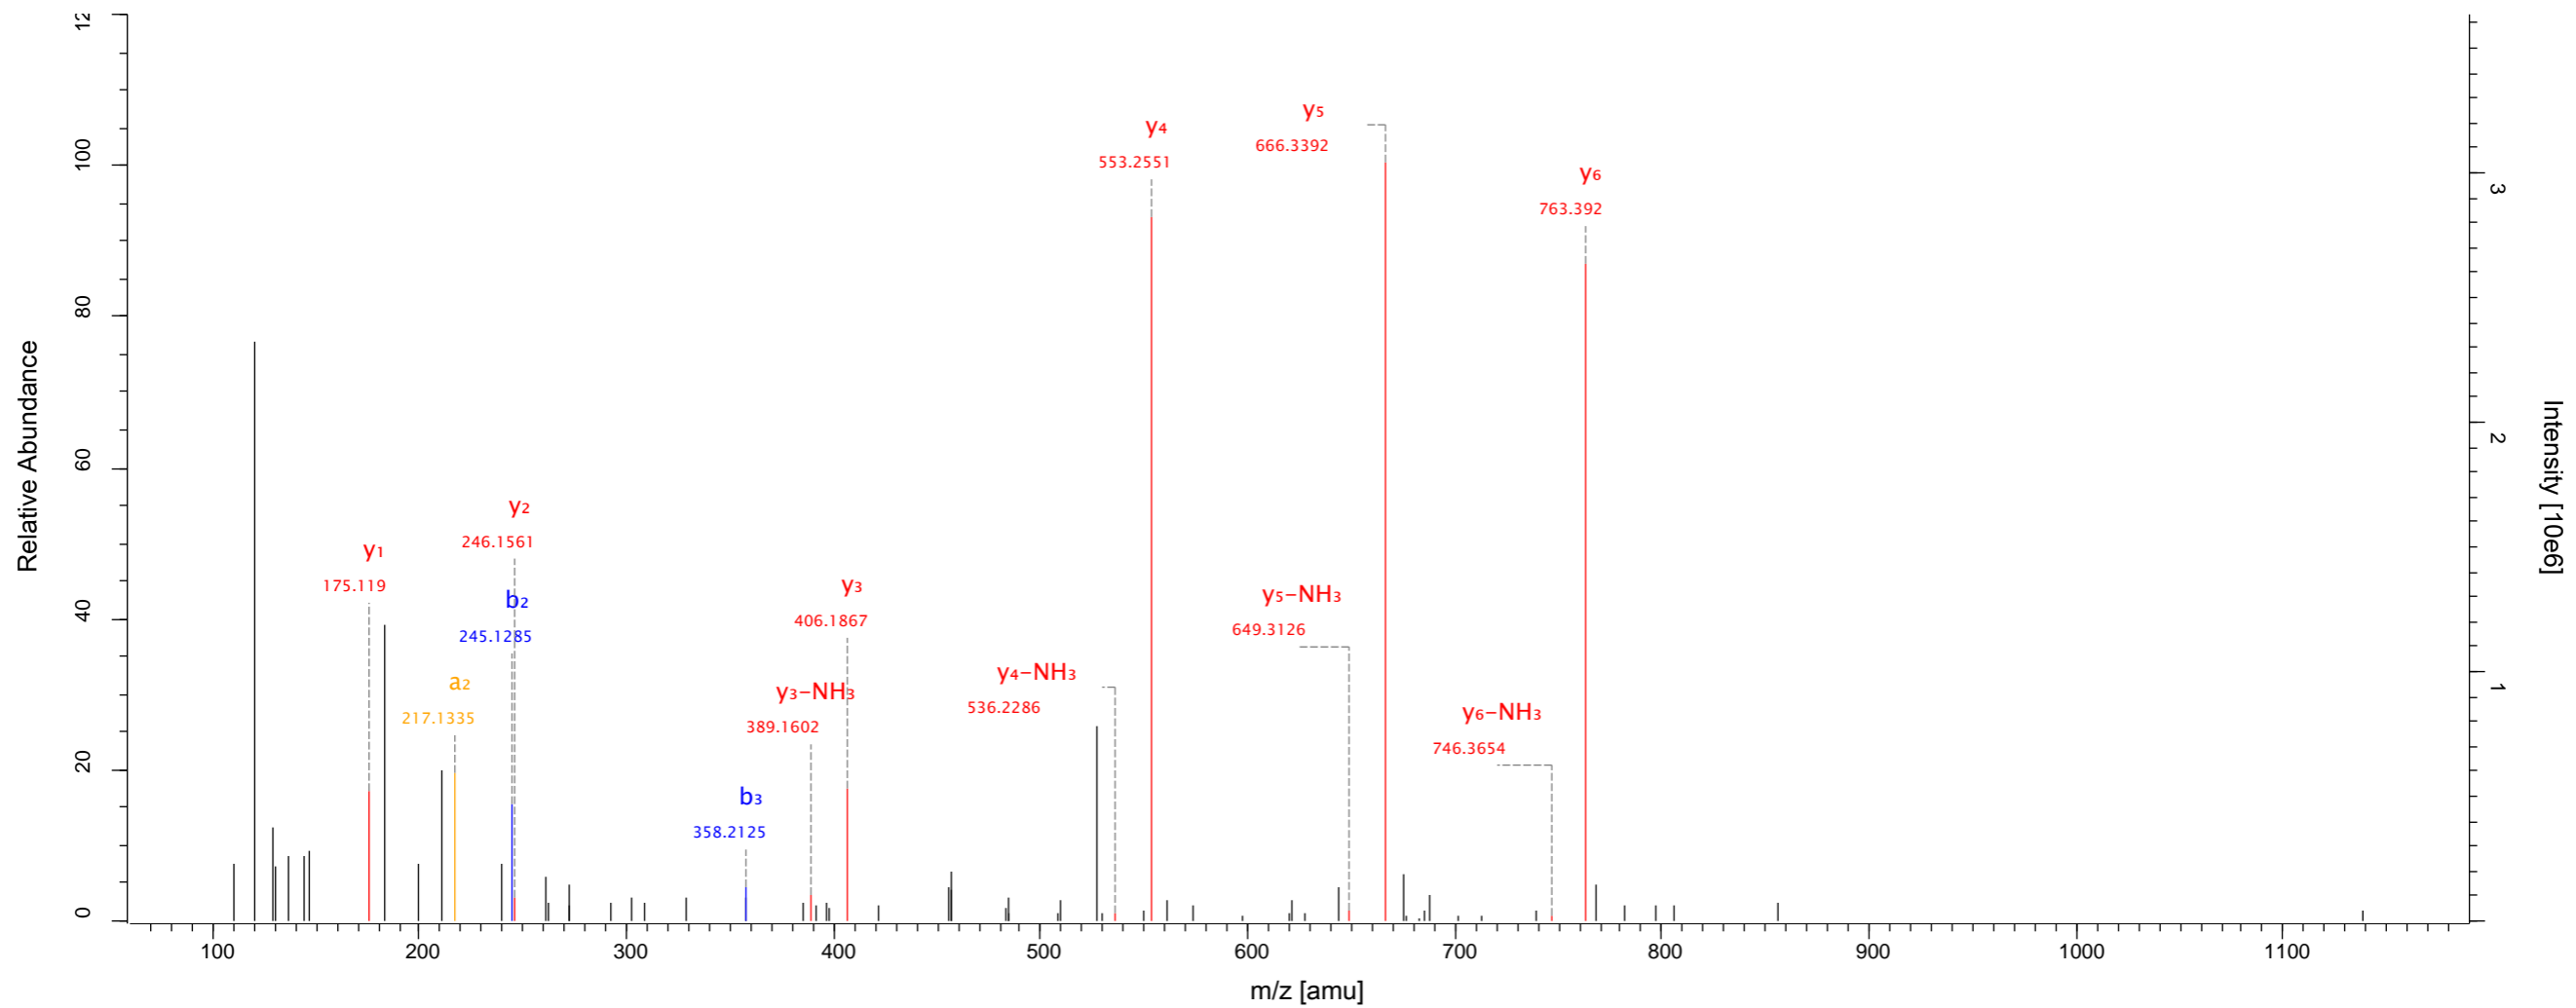

Raw file: 20111212\_EXQ5\_AnMi\_QC\_HCMVp1\_10  
Scan number: 32518  
Protein: ORFS343C.iORF1 - NC\_006273.2[210869,211213]- <unknown description>  
Peptide score: 80.68  
Method: FTMS; HCD

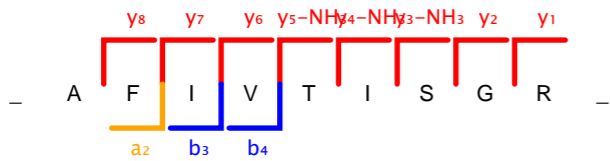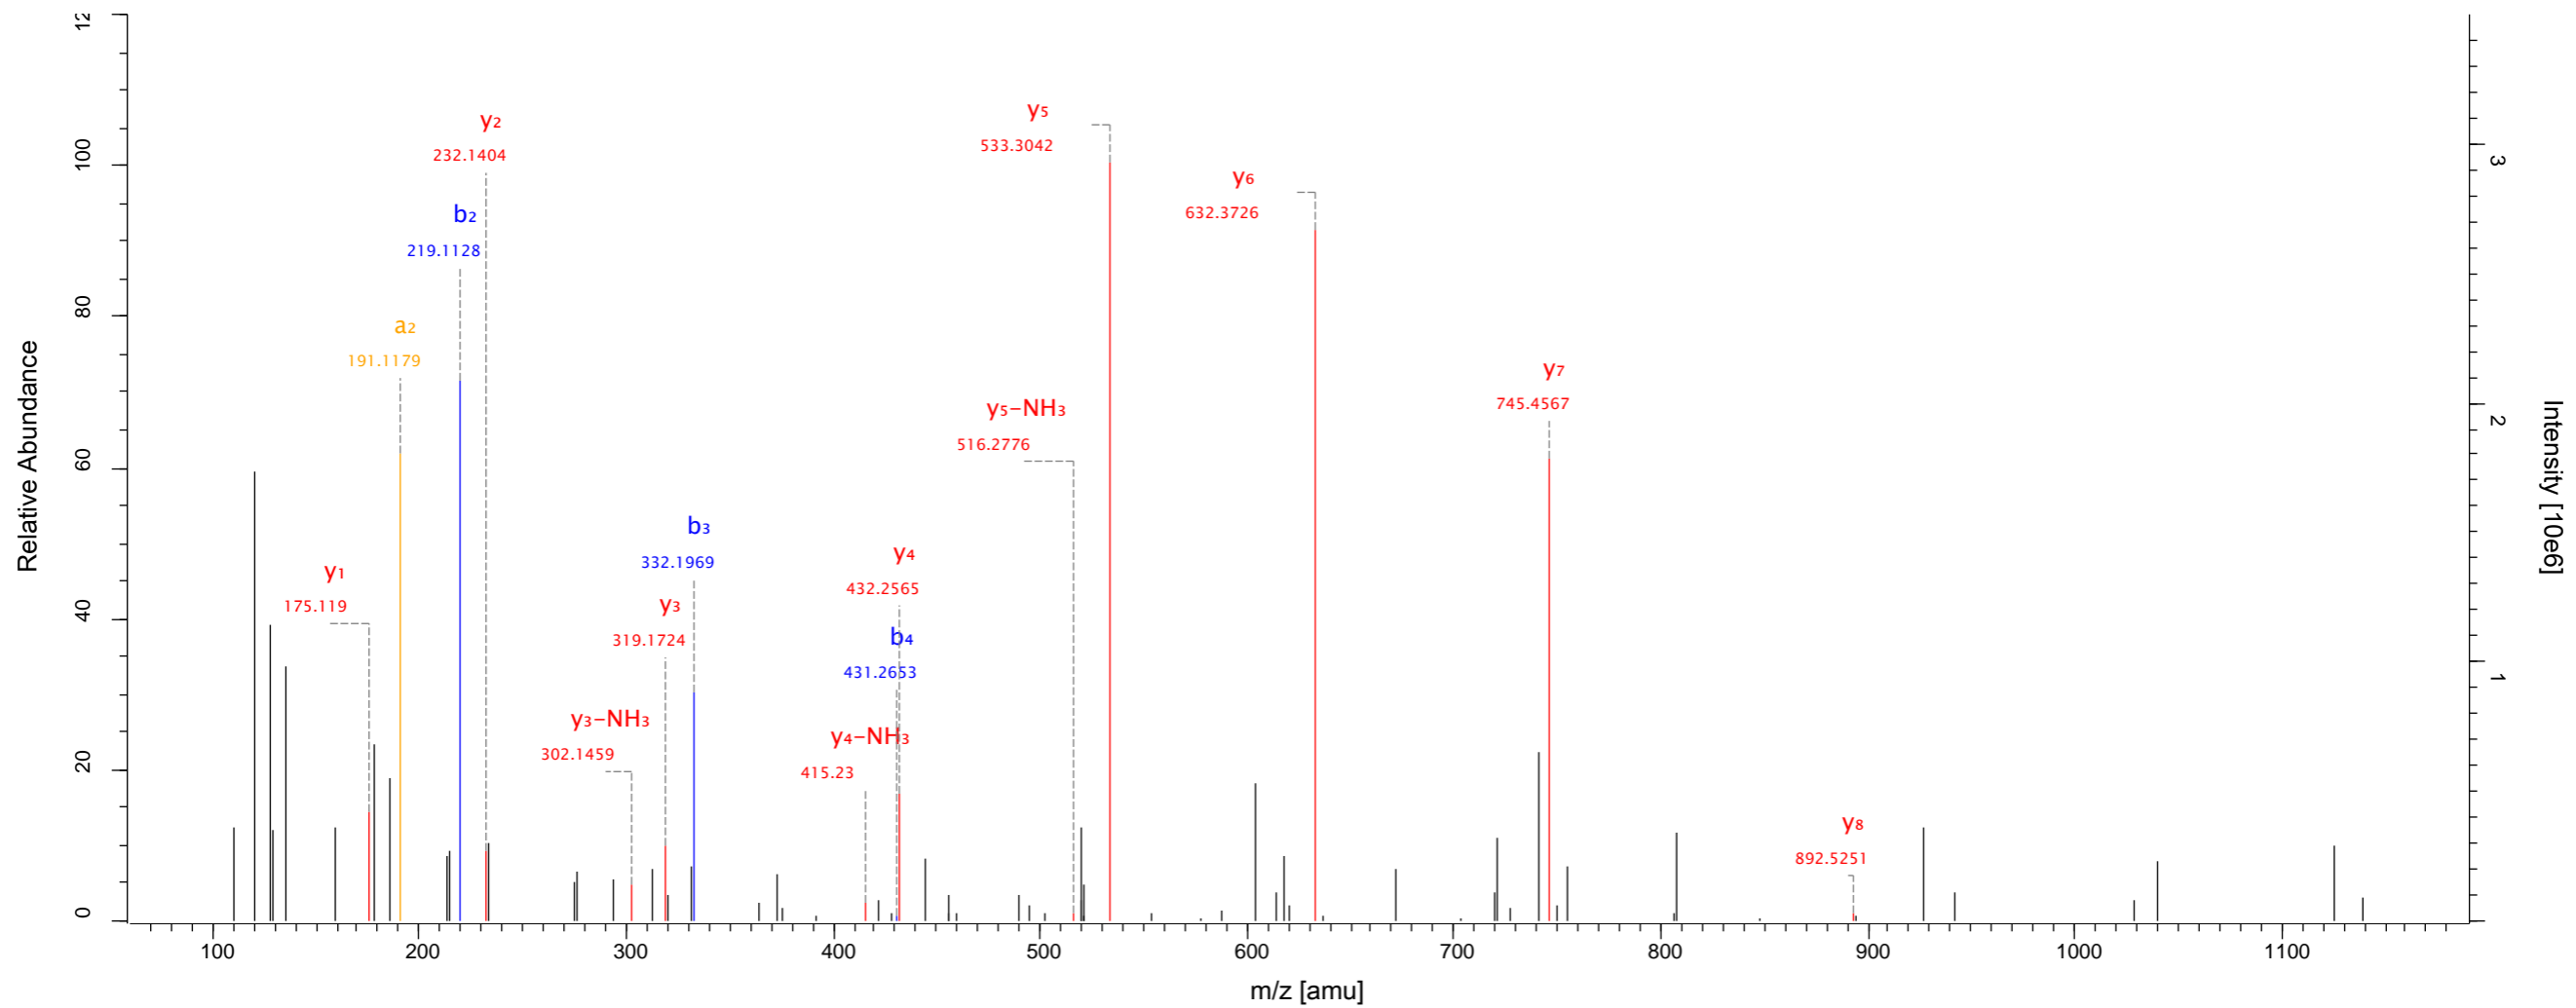

Raw file: 20111212\_EXQ5\_AnMi\_QC\_HCMVp11\_10  
 Scan number: 32895  
 Protein: ORFL223W + NC\_006273.2[139458,139730]+ <unknown description>  
 Peptide score: 136.35  
 Method: FTMS; HCD

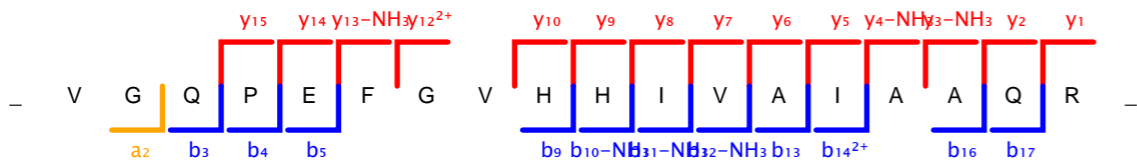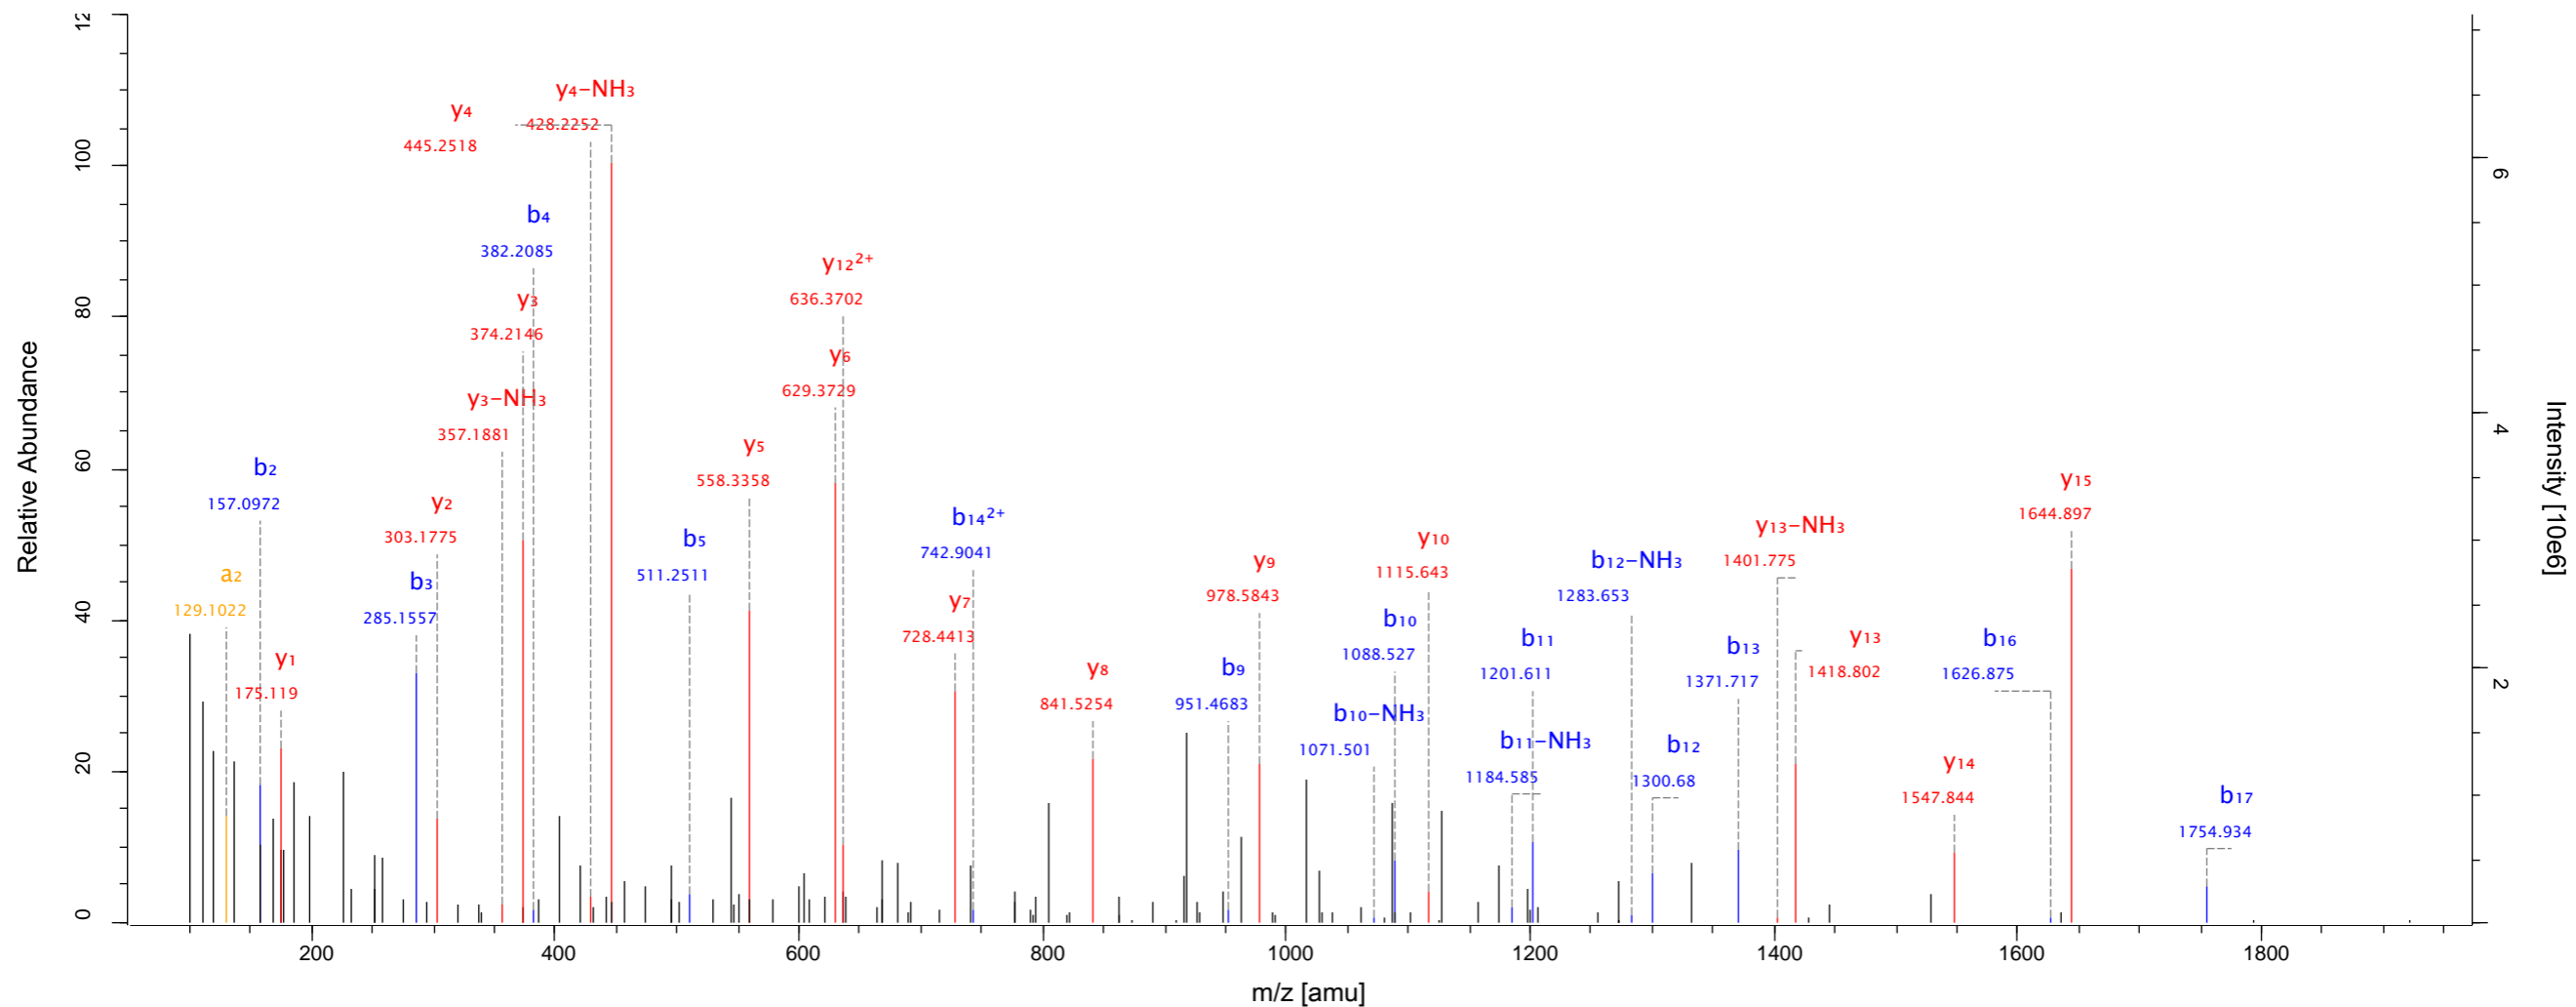

Raw file: 20111212\_EXQ5\_AnMi\_QC\_HCMVp1\_10  
 Scan number: 33109  
 Protein: ORFL88C - NC\_006273.2[37894,38133]- <unknown description>  
 Peptide score: 215.79  
 Method: FTMS; HCD

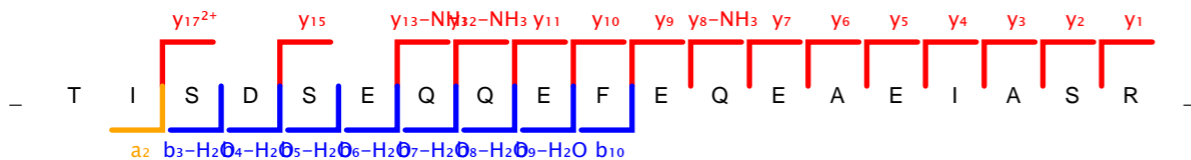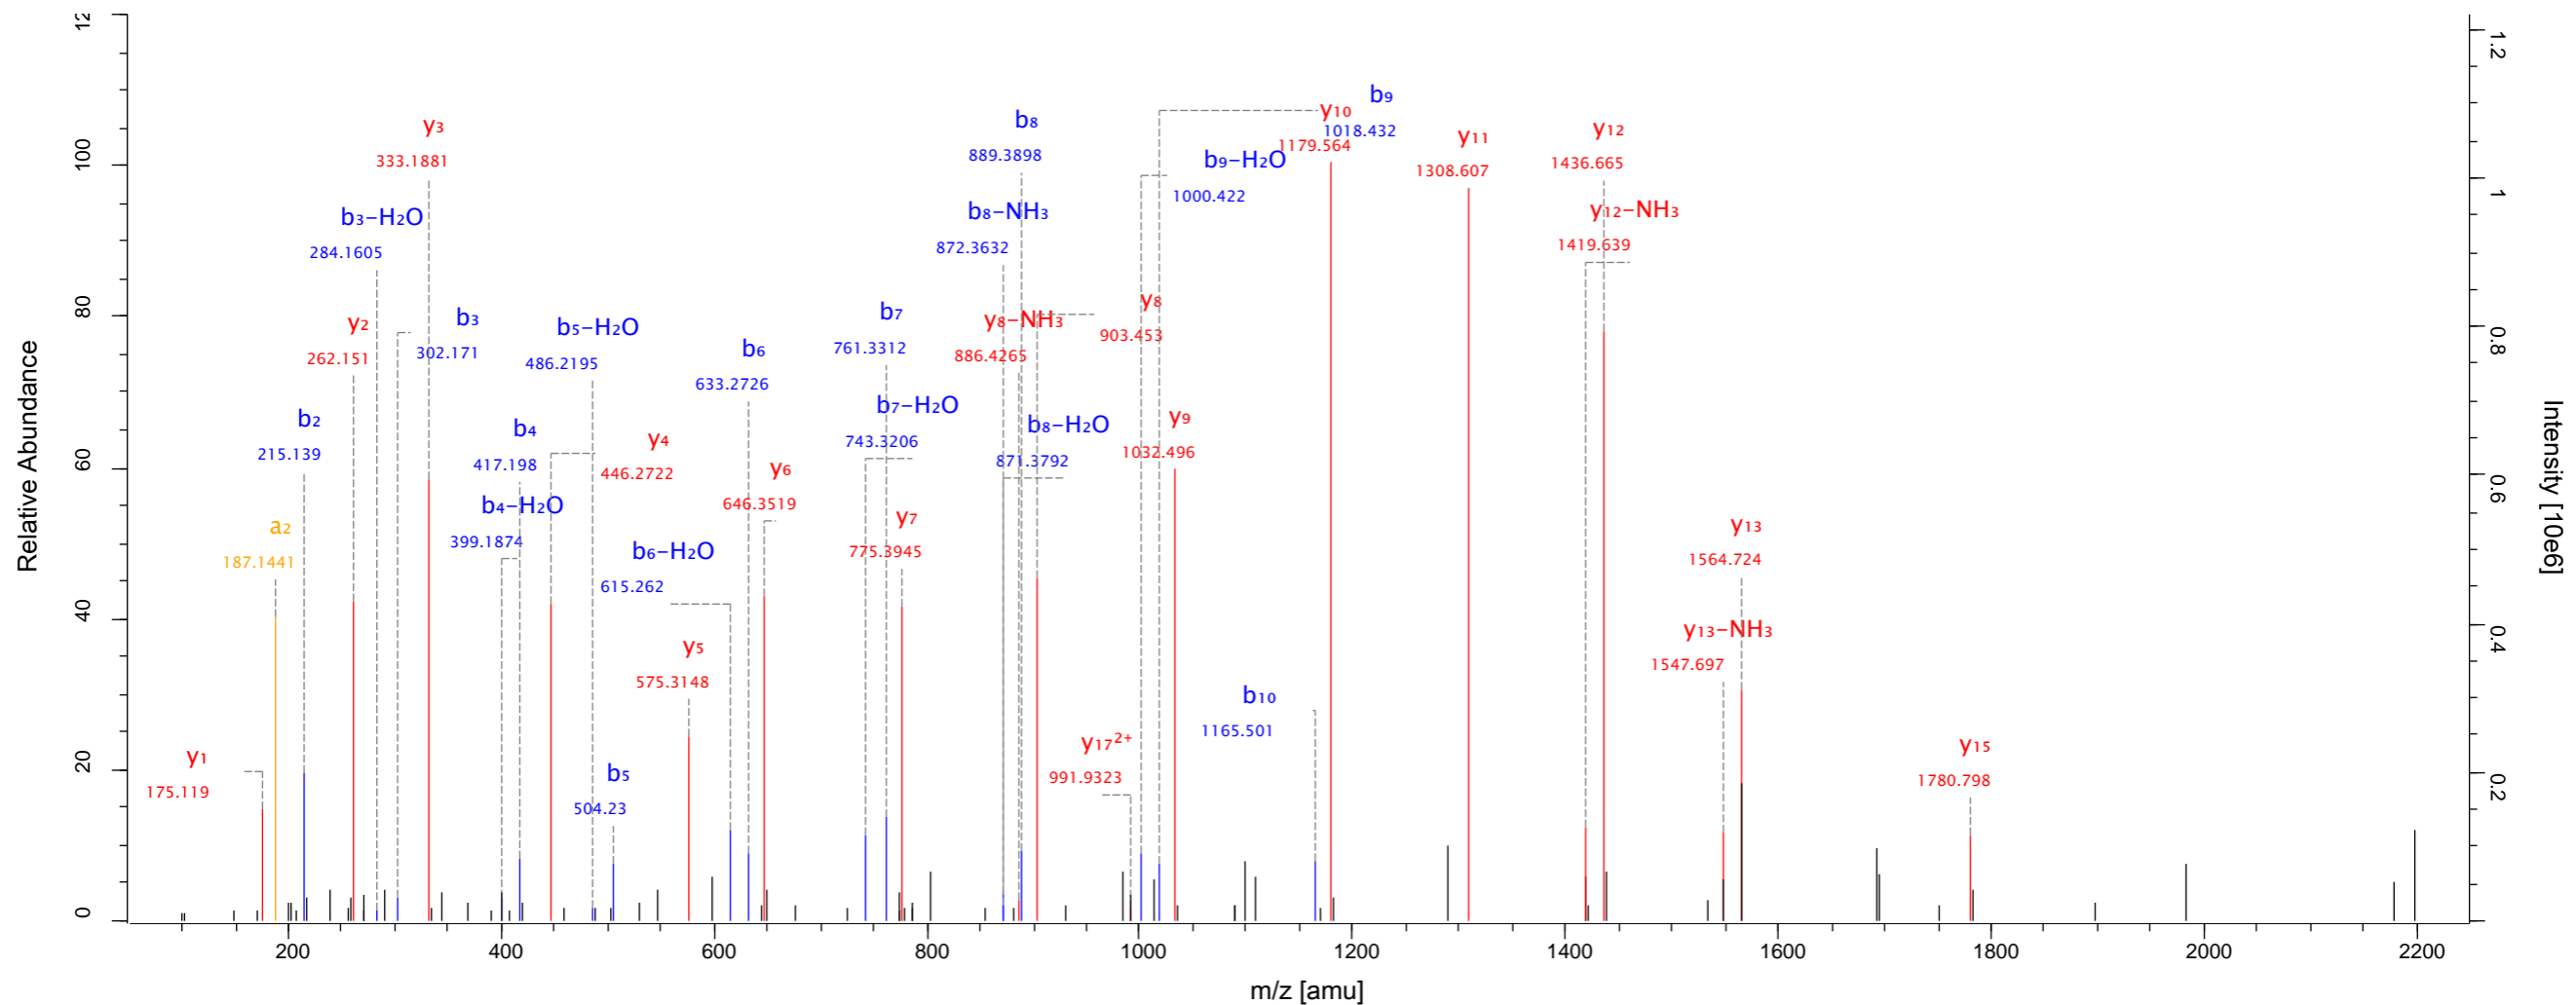

Raw file: 20111212\_EXQ5\_AnMi\_QC\_HCMVp1\_10  
 Scan number: 34442  
 Protein: ORFL154W + NC\_006273.2[96843,97115]+ <unknown description>  
 Peptide score: 192.18  
 Method: FTMS; HCD

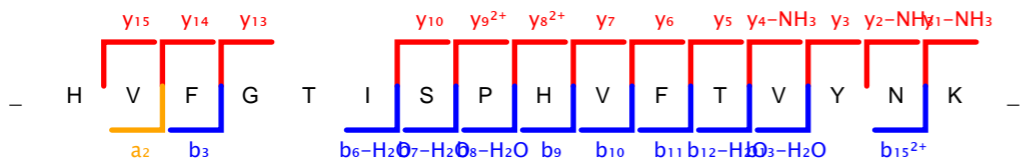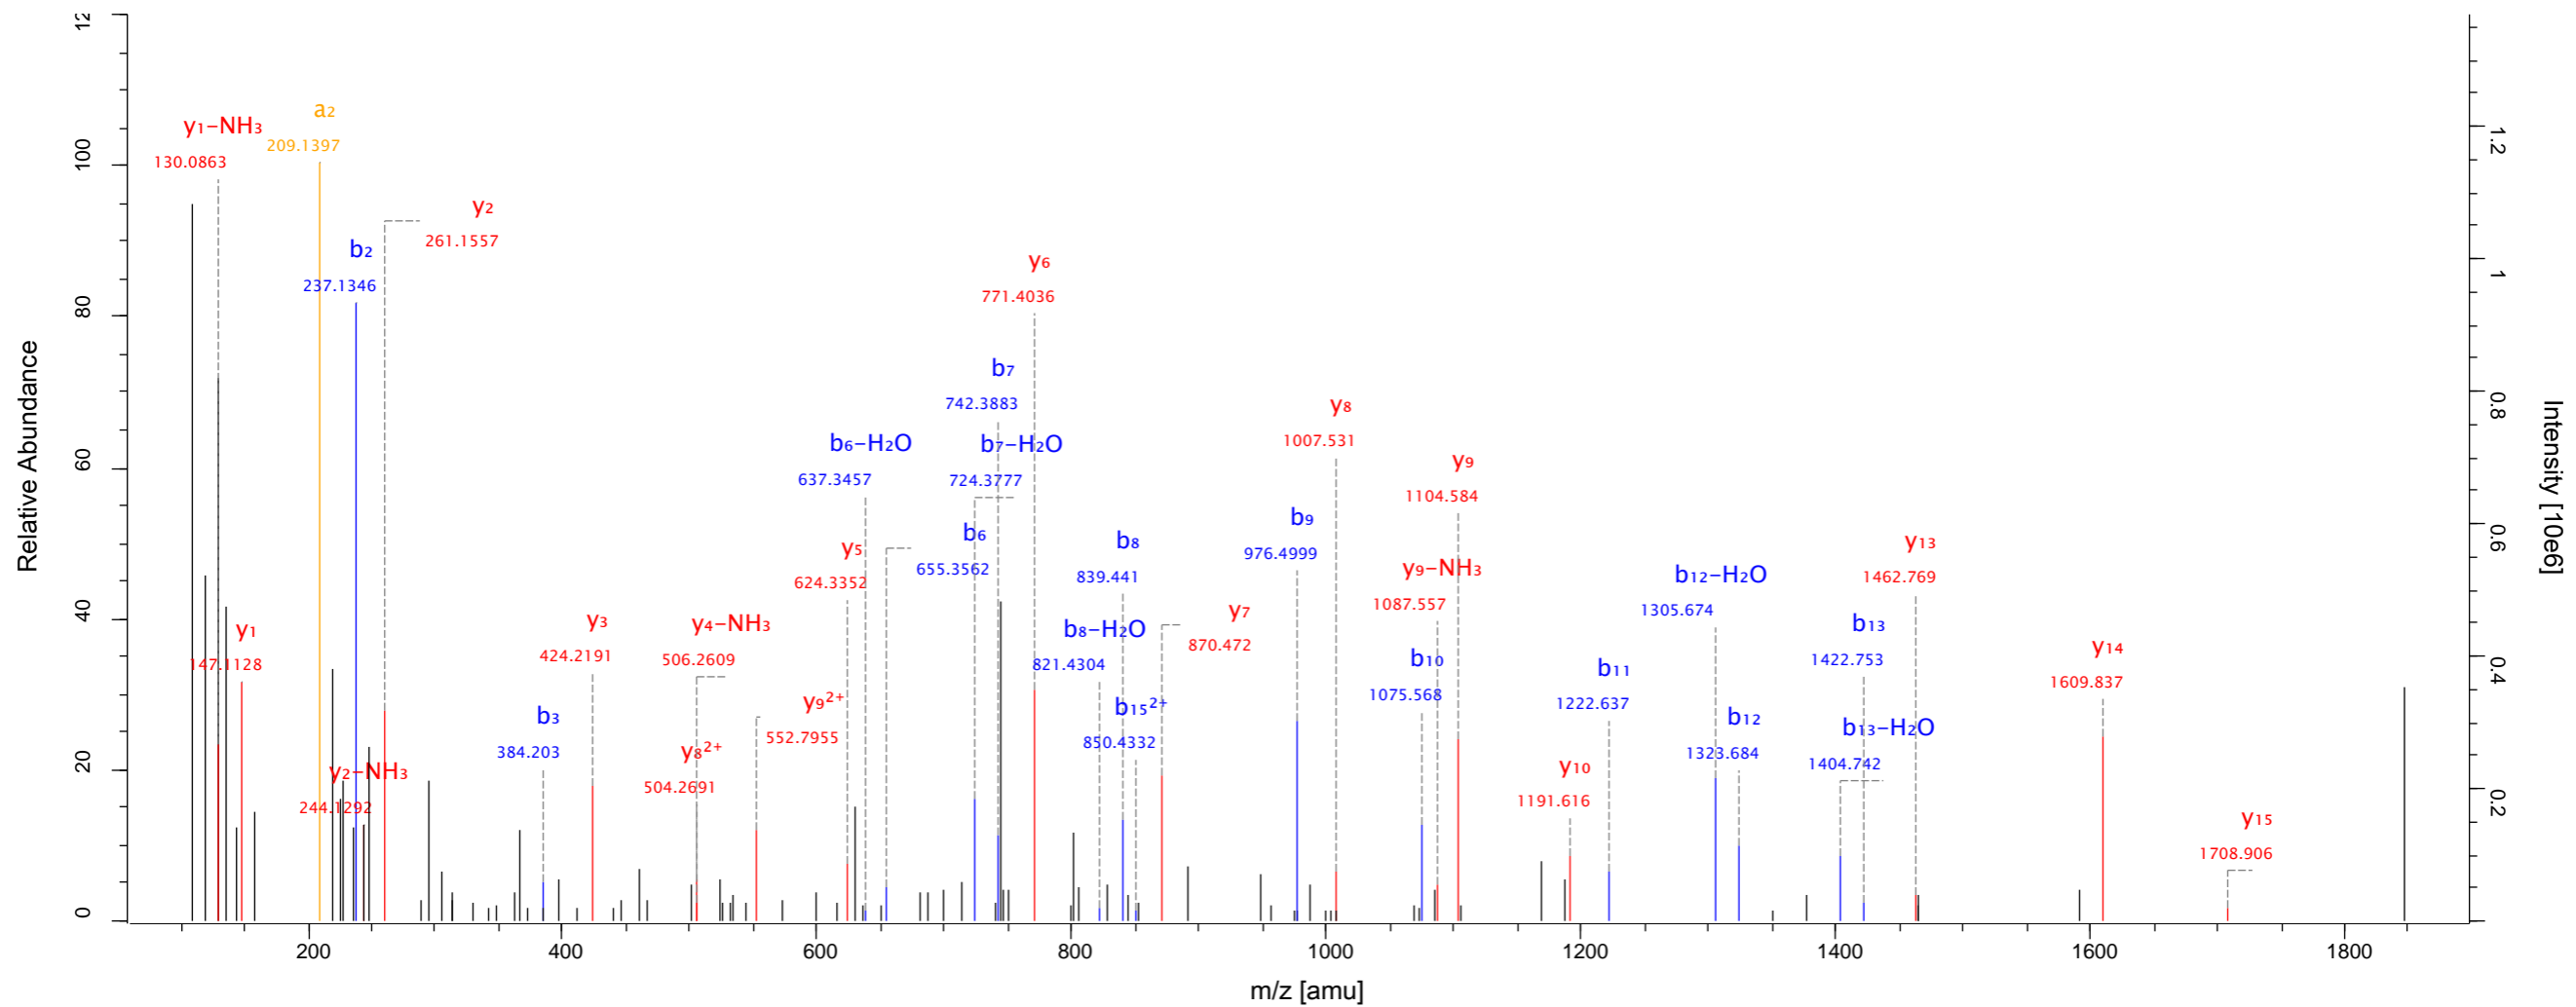

Raw file: 20111212\_EXQ5\_AnMi\_QC\_HCMVp1\_10  
Scan number: 34656  
Protein: ORFL253W.iORF3 + NC\_006273.2[162059,162286]+ <unknown description>  
Peptide score: 73.66  
Method: FTMS; HCD

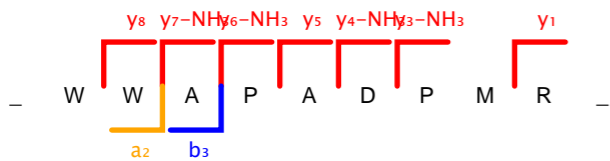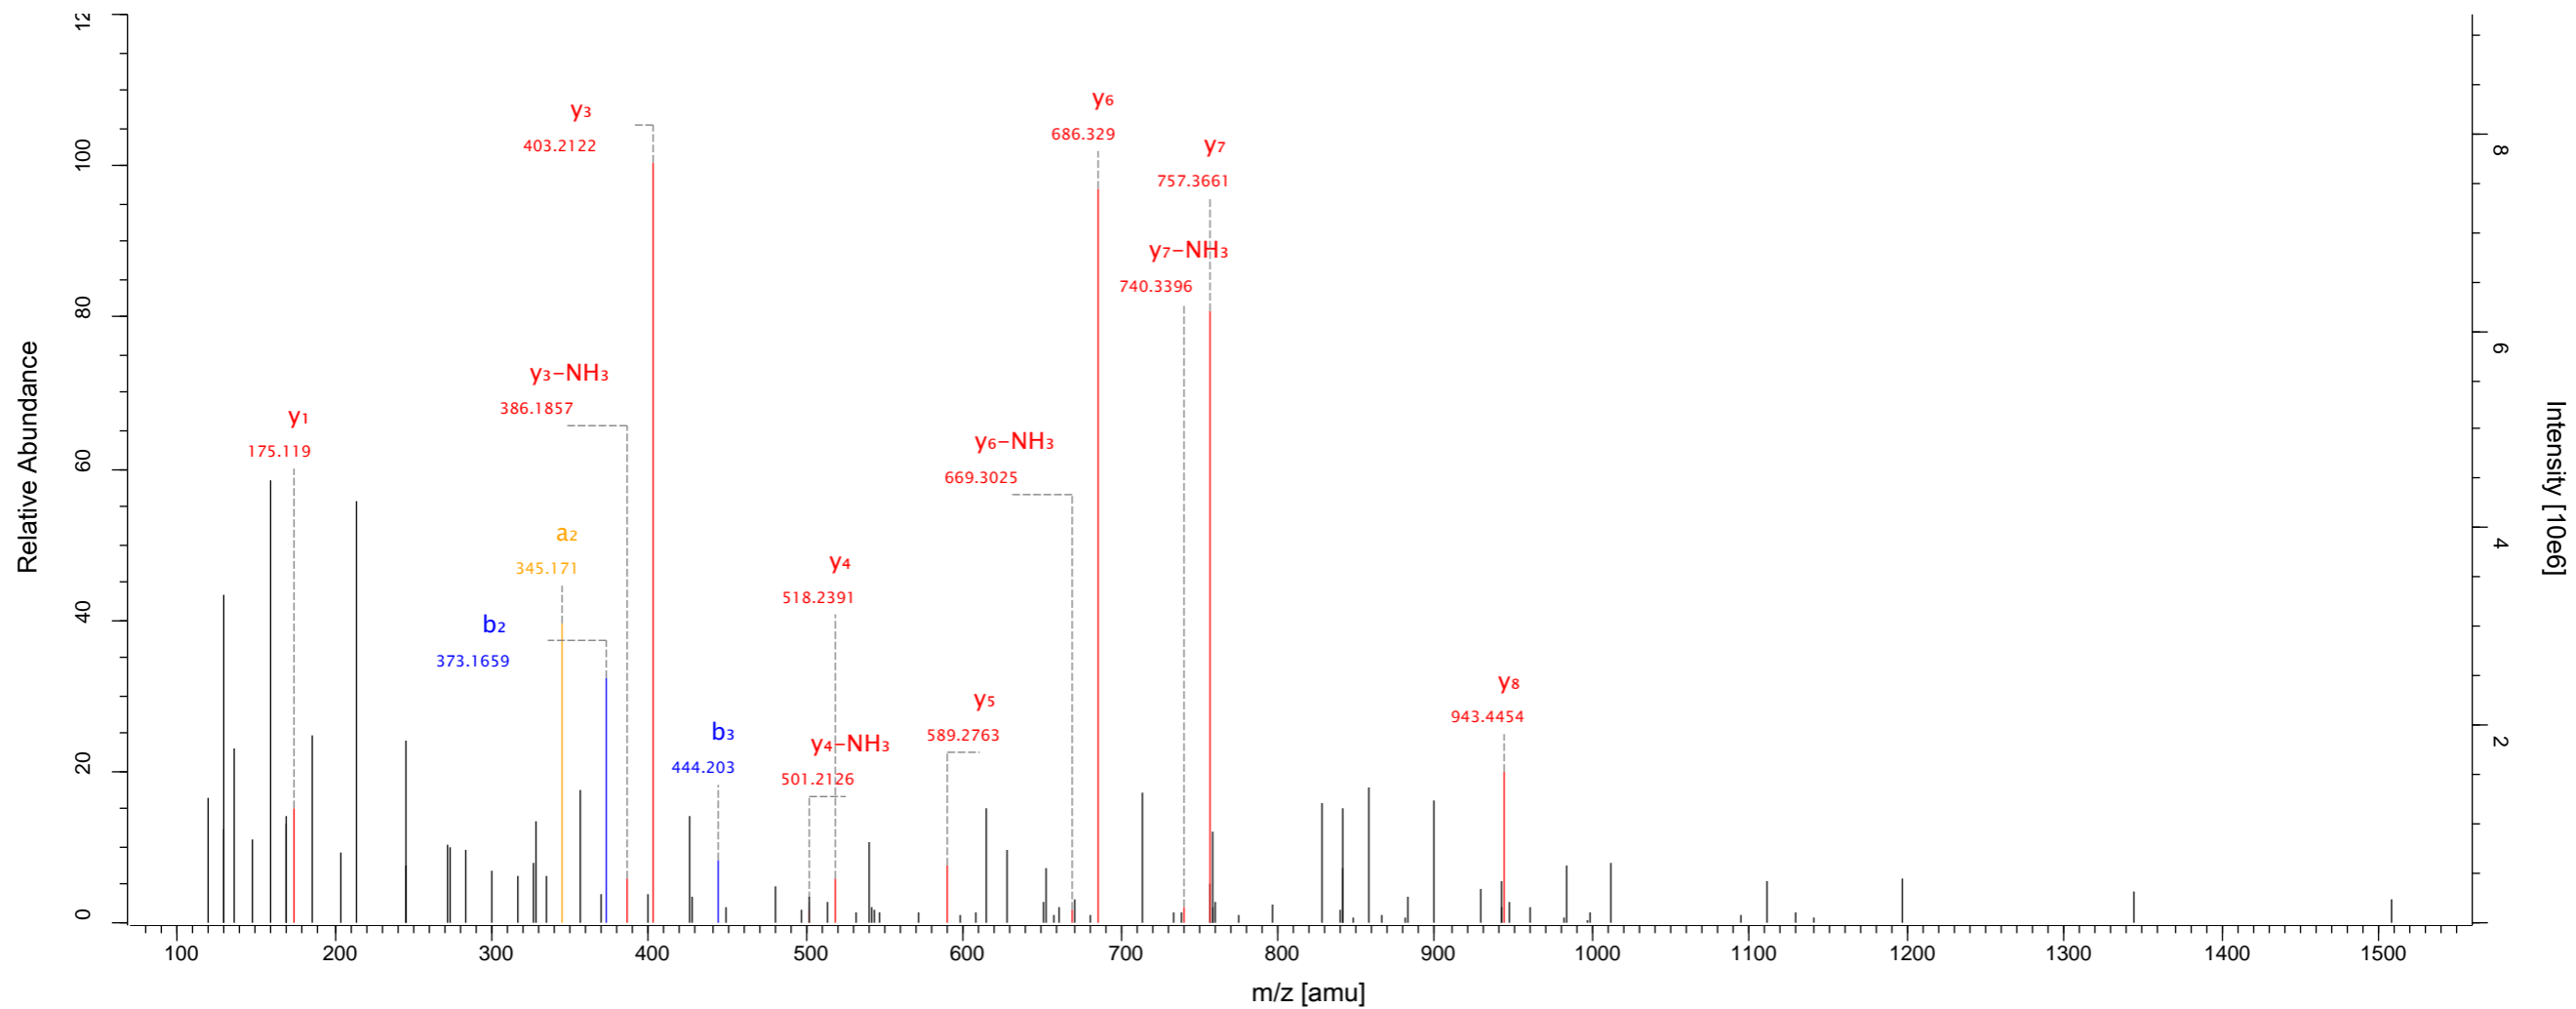

Raw file: 20111212\_EXQ5\_AnMi\_QC\_HCMVp1\_10  
Scan number: 35559  
Protein: ORFL161C.iORF2 - NC\_006273.2[101063,101479]- <unknown description>  
Peptide score: 160.47  
Method: FTMS; HCD

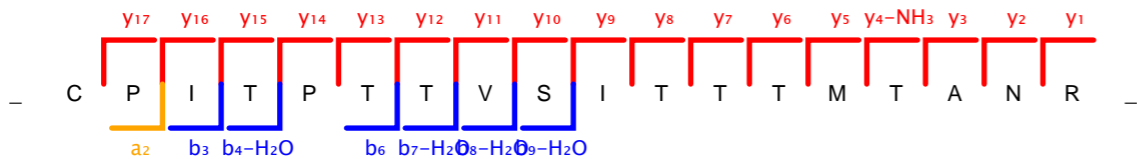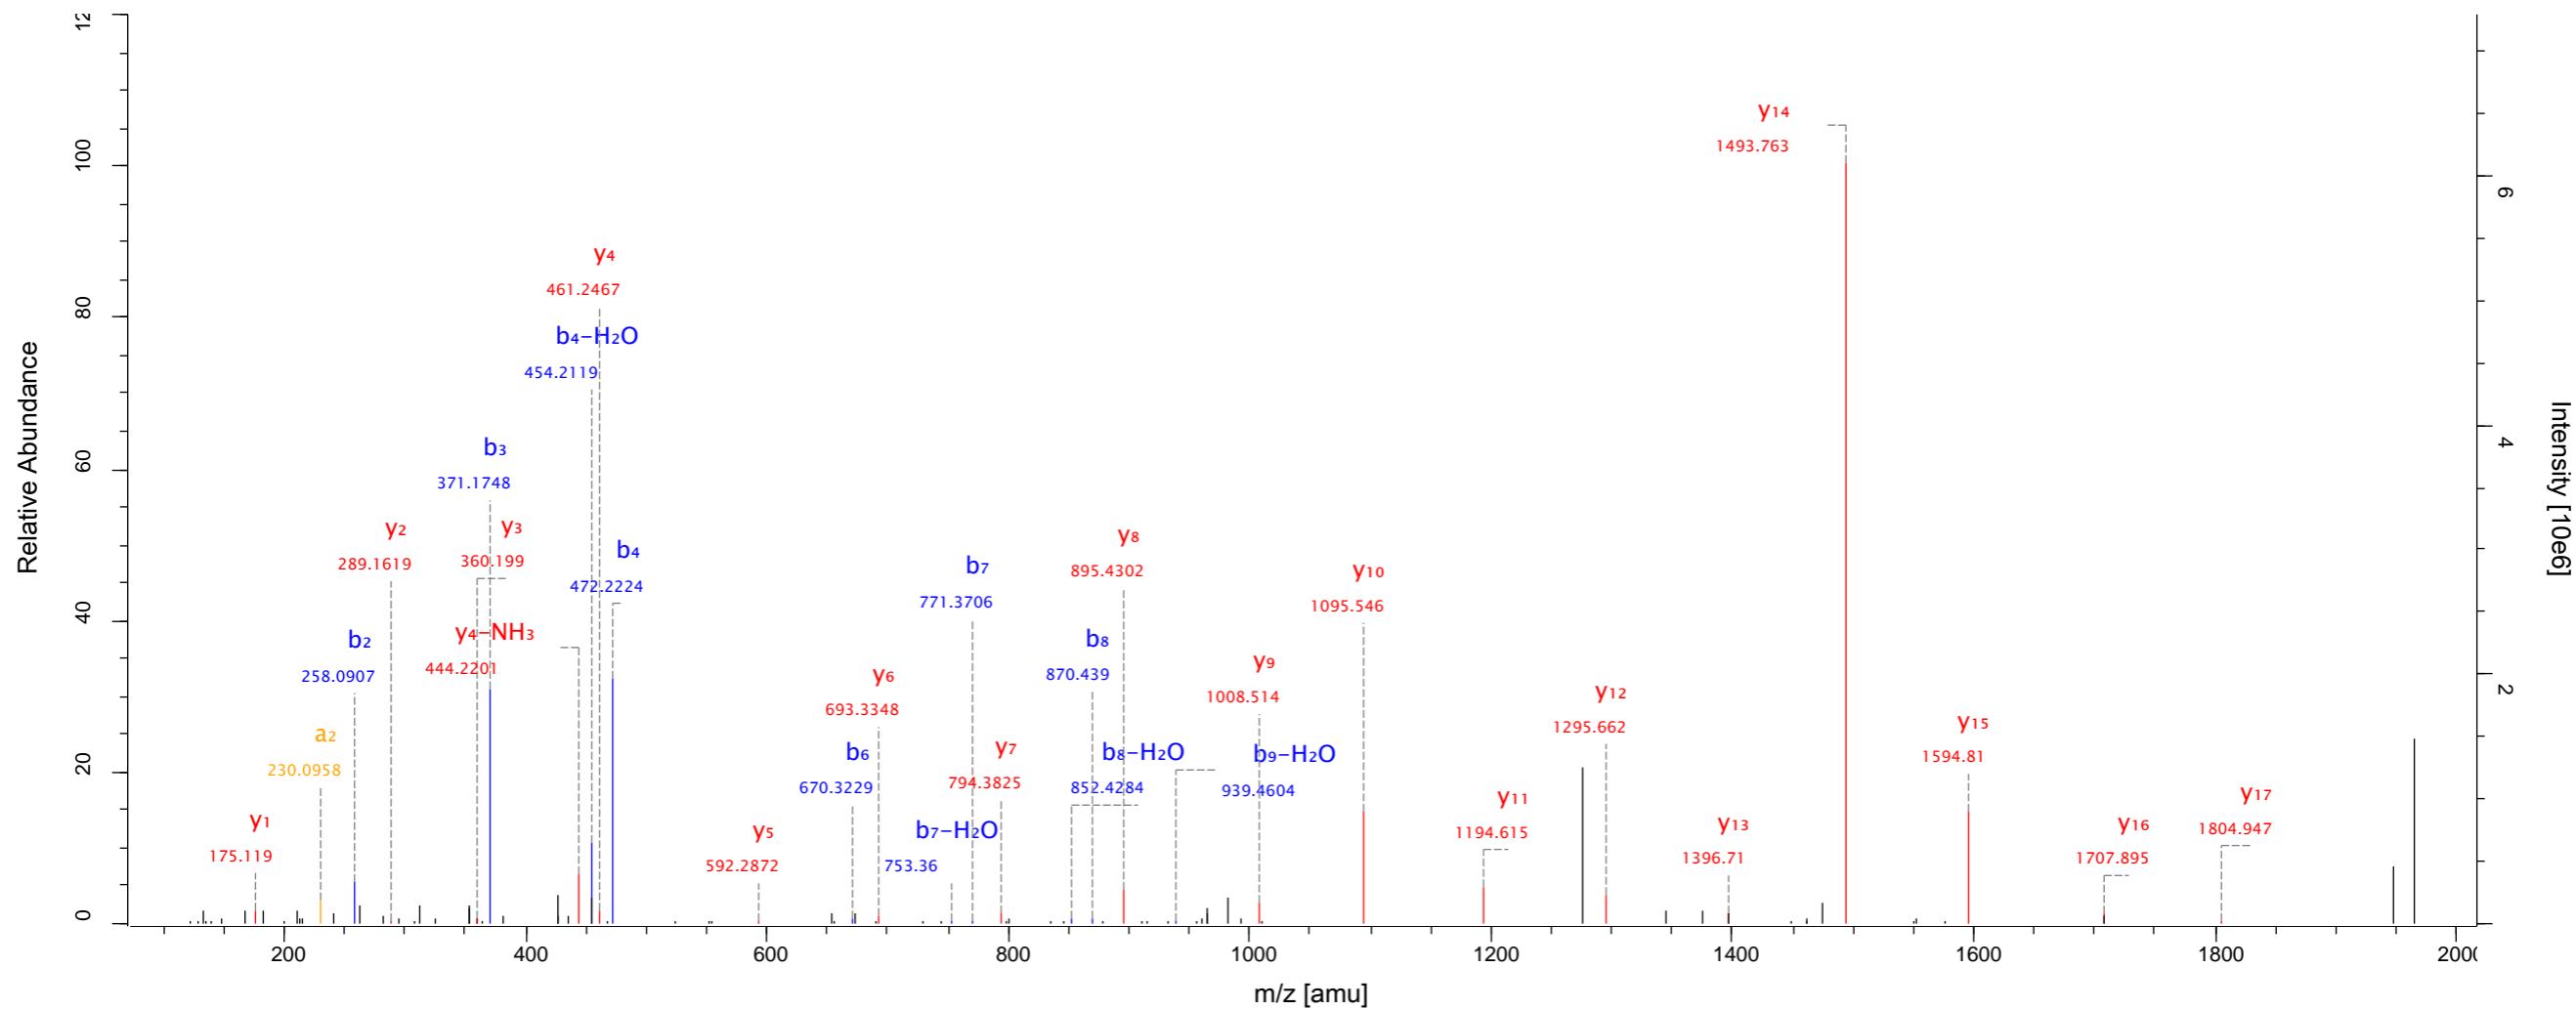



Raw file: 20111212\_EXQ5\_AnMi\_QC\_HCMVp1\_10  
 Scan number: 38279  
 Protein: ORFL174C.iORF2 - NC\_006273.2[106396,106770]- <unknown description>  
 Peptide score: 127.79  
 Method: FTMS; HCD

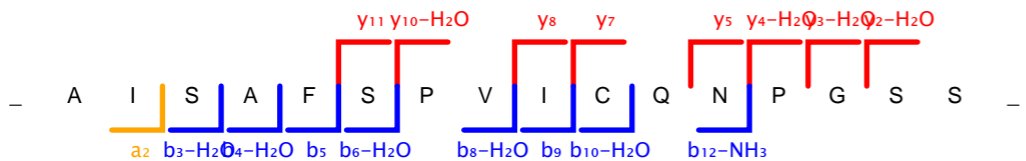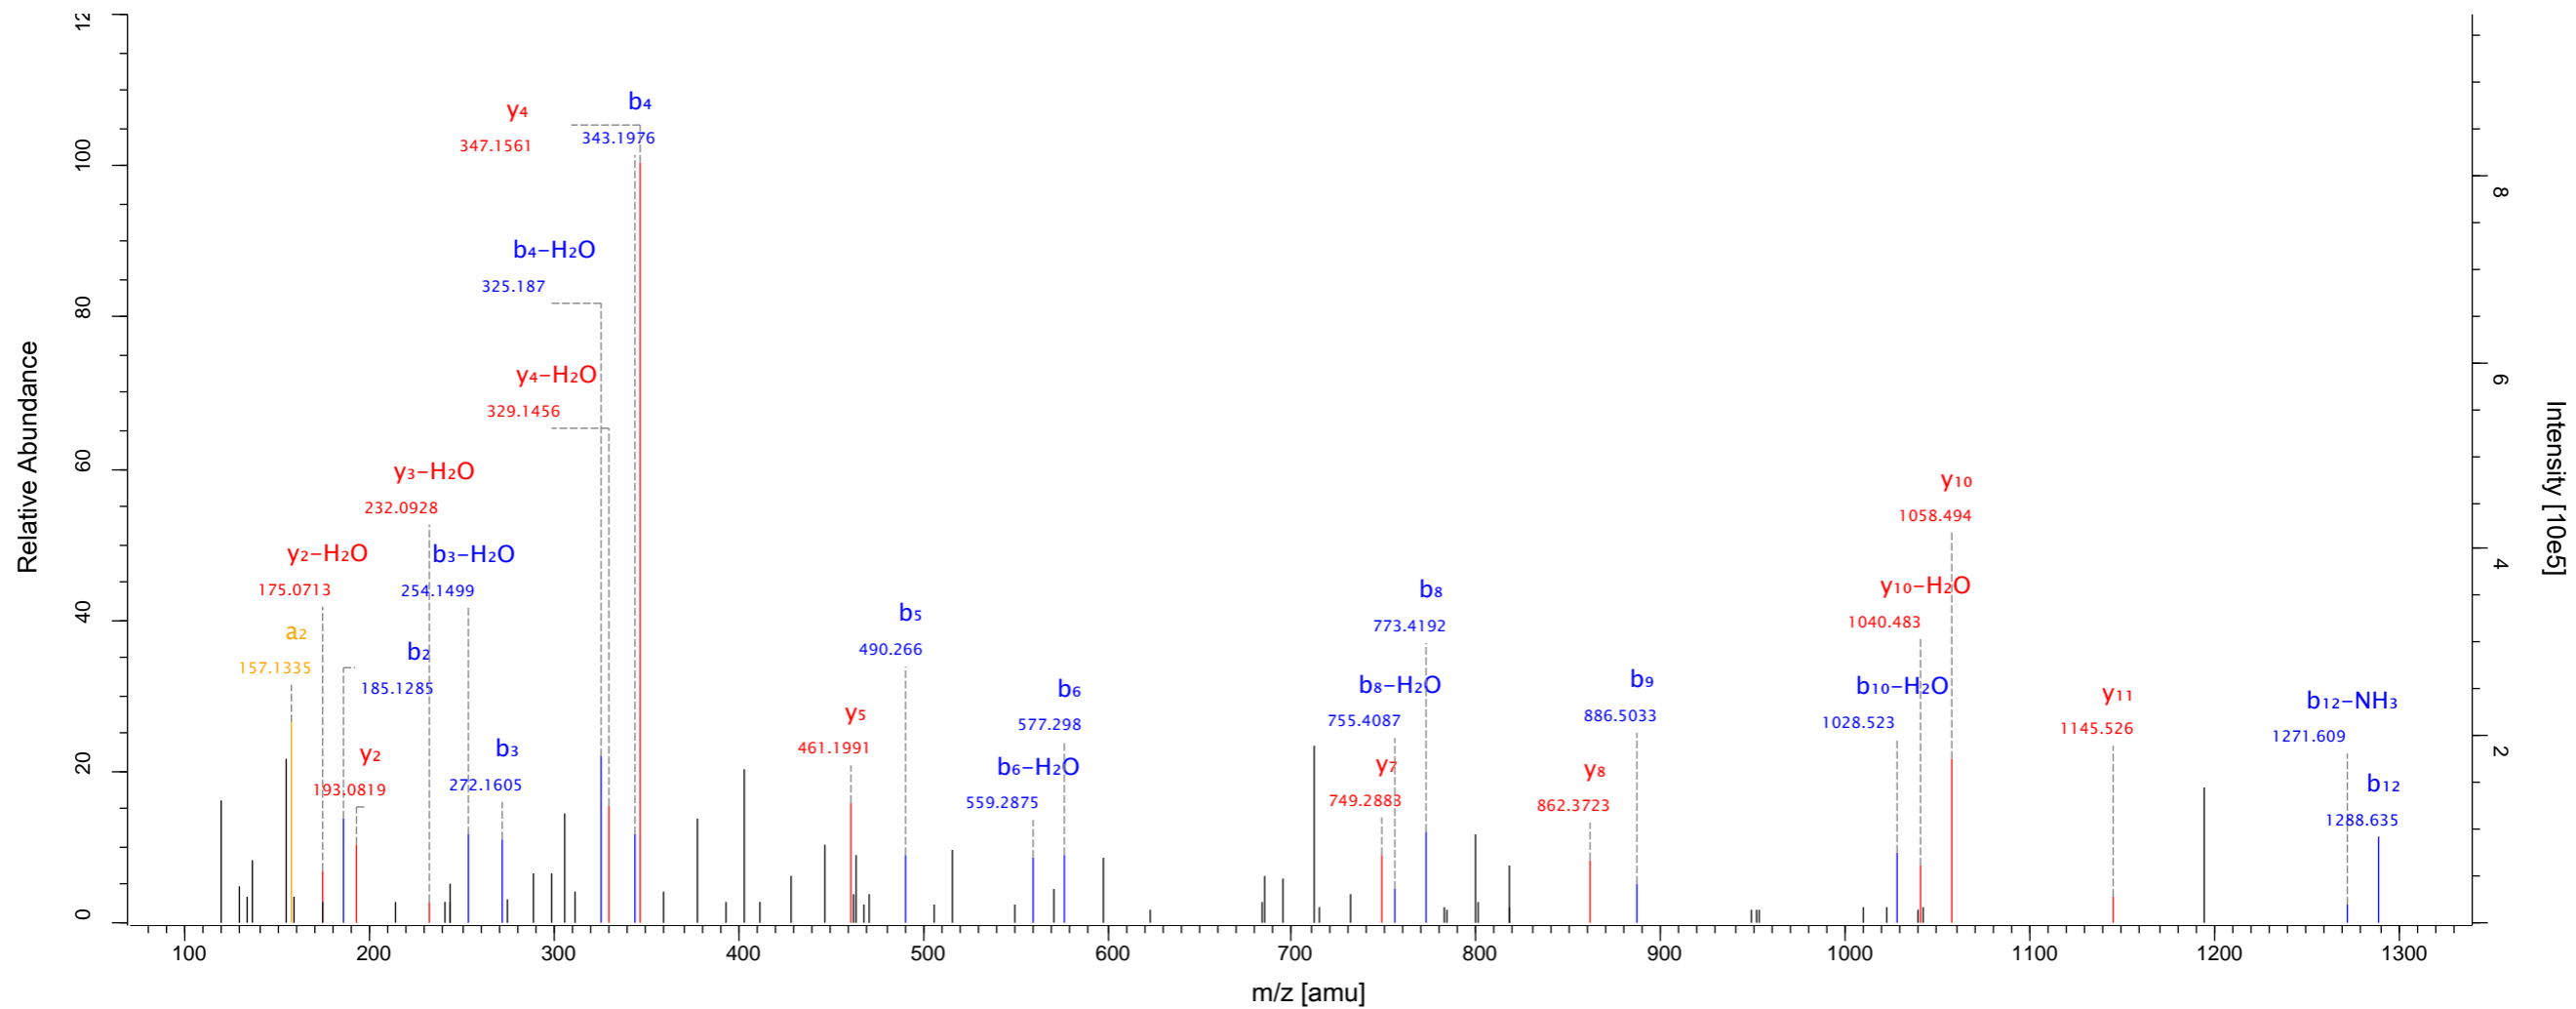

Raw file: 20111212\_EXQ5\_AnMi\_QC\_HCMVp1\_10  
Scan number: 41372  
Protein: ORFL211W + NC\_006273.2[125859,126083]+ <unknown description>  
Peptide score: 110.08  
Method: FTMS; HCD

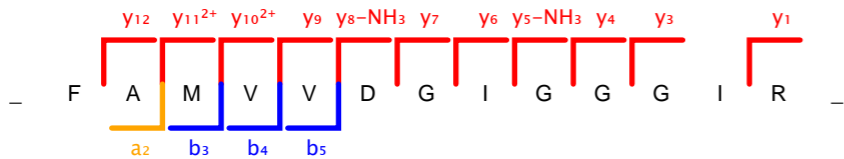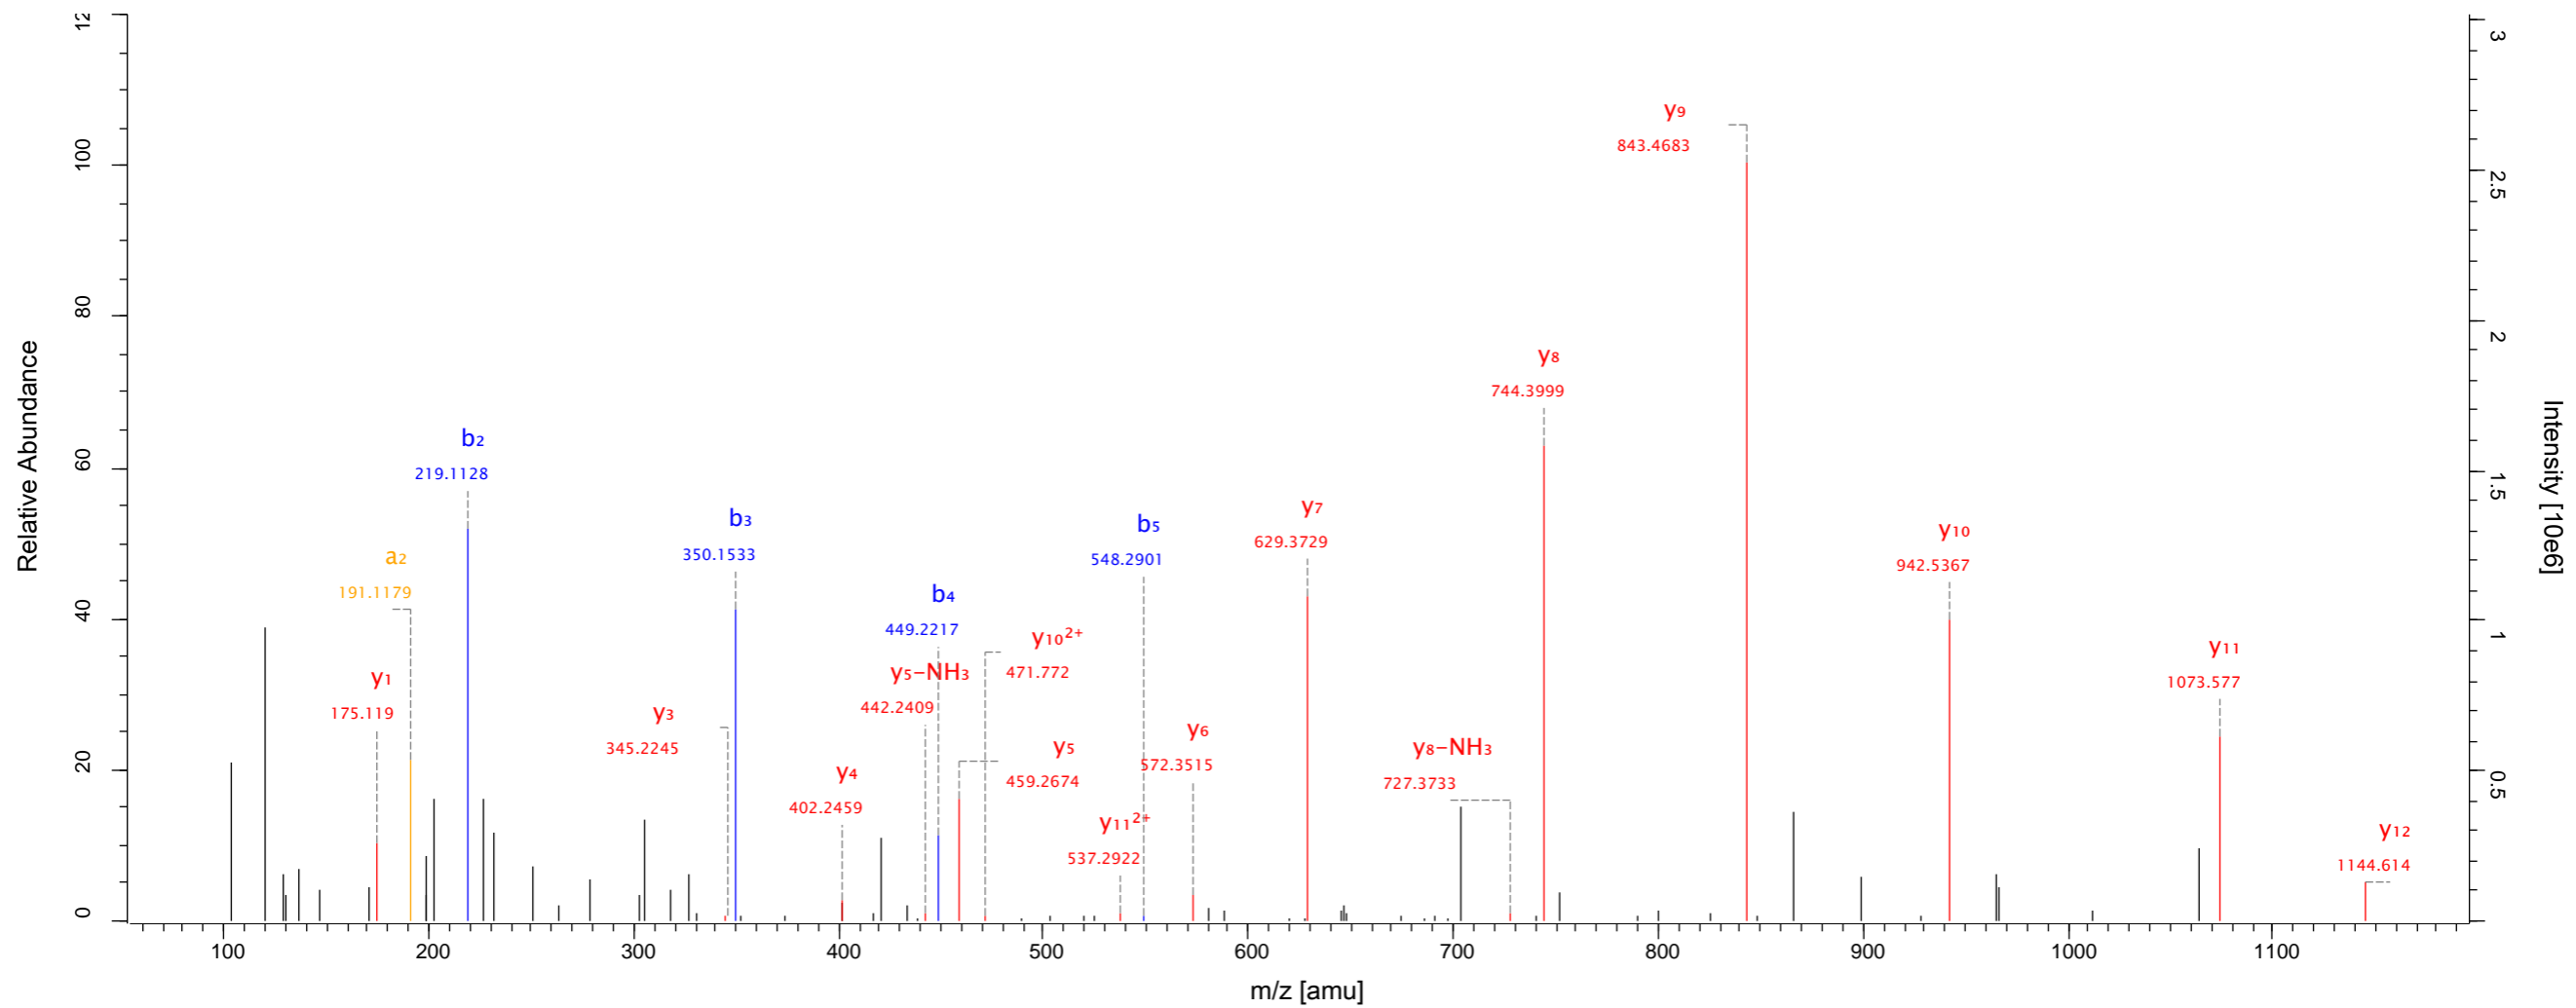

Raw file: 20111212\_EXQ5\_AnMi\_QC\_HCMVp11\_10  
 Scan number: 44022  
 Protein: ORFL88C - NC\_006273.2[37894,38133]- <unknown description>  
 Peptide score: 207.88  
 Method: FTMS; HCD

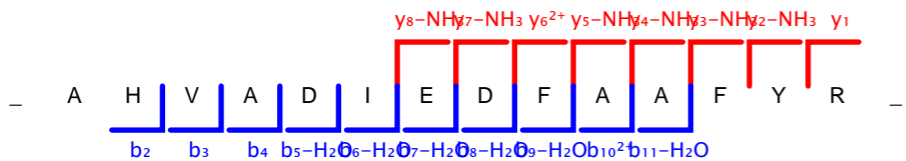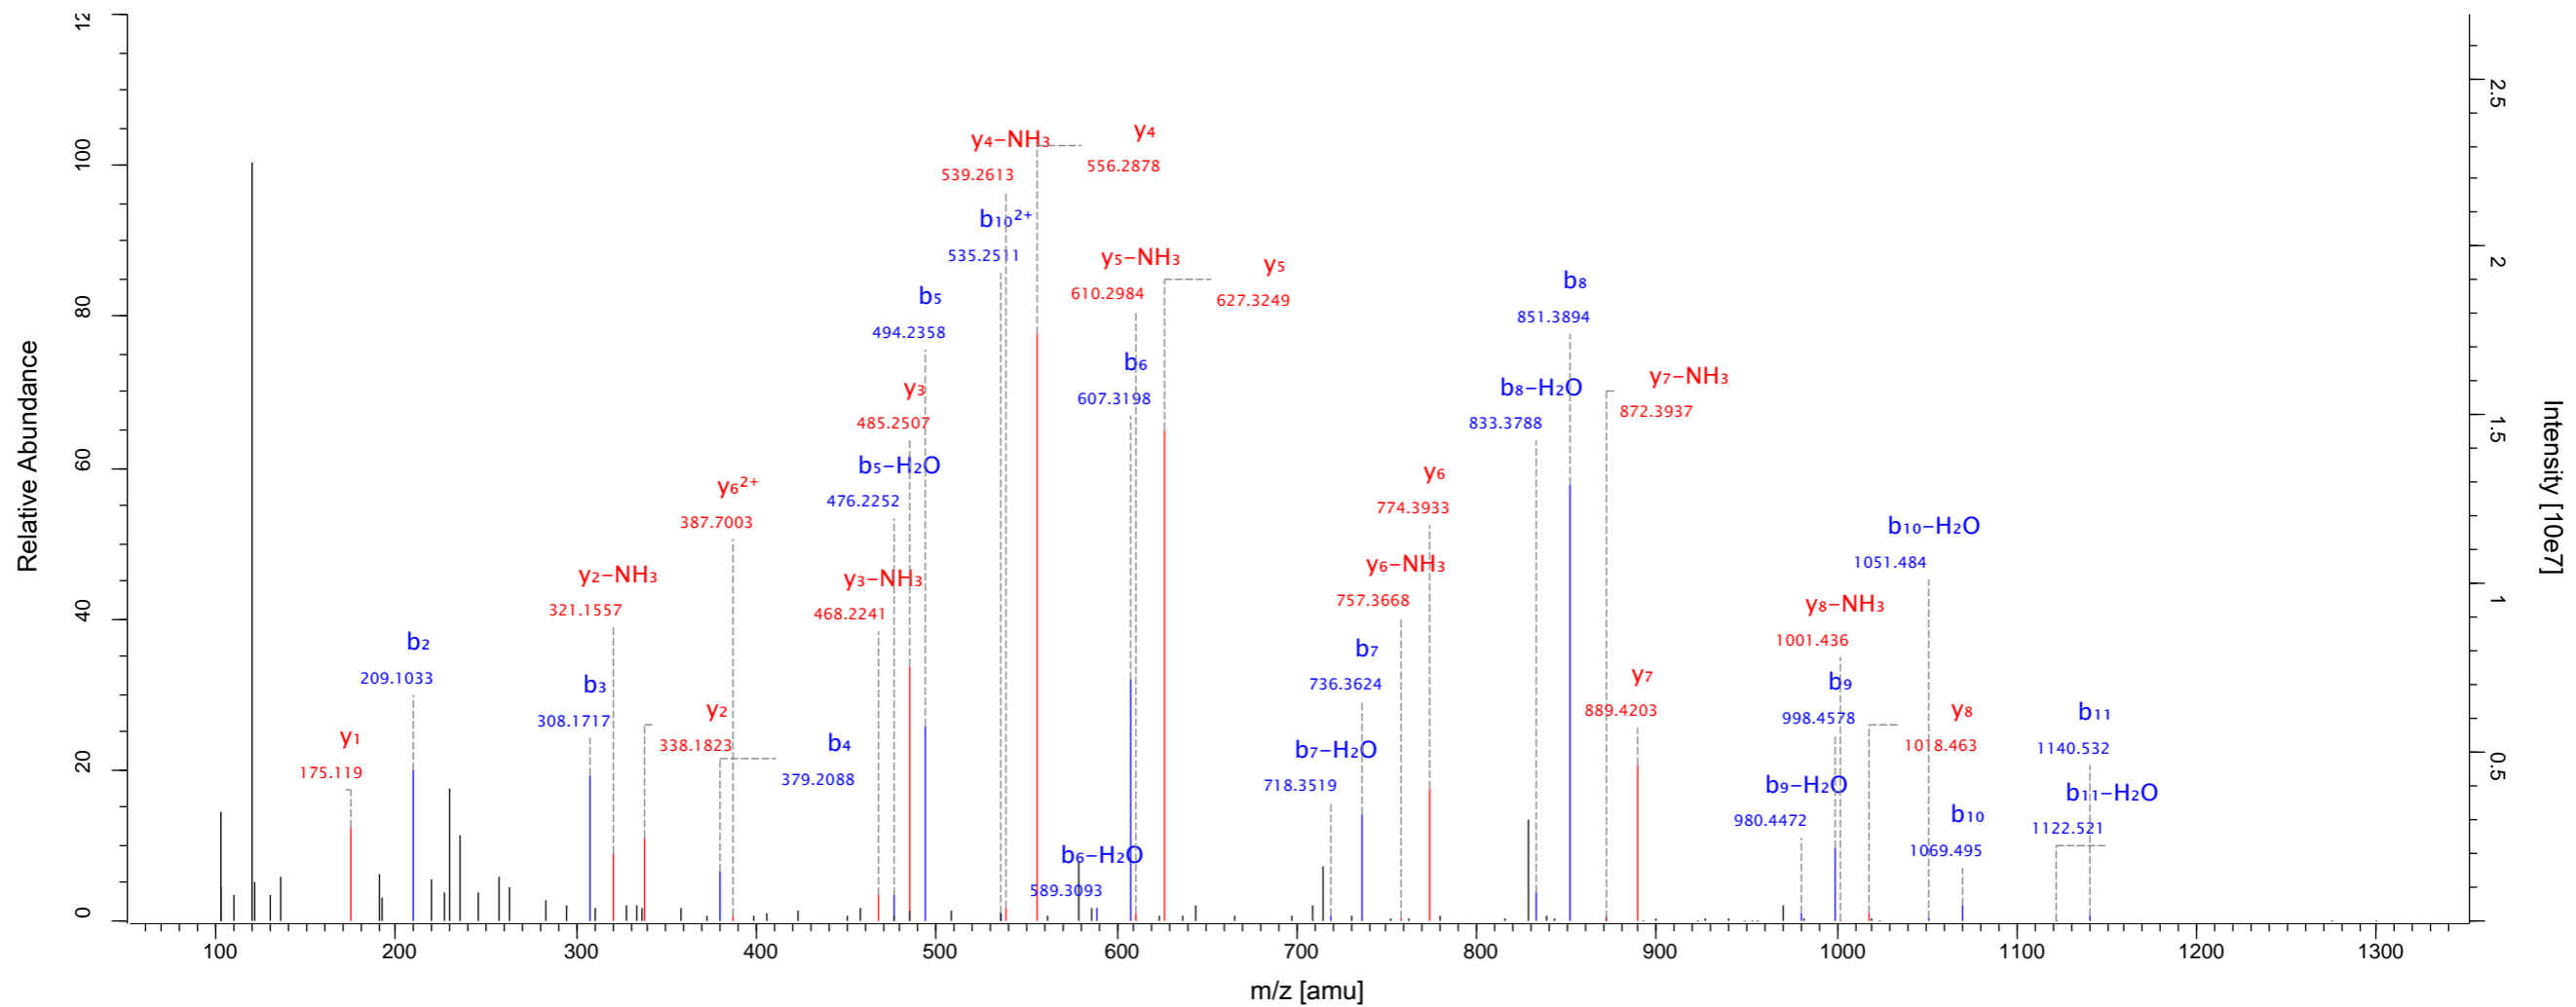

Raw file: 20111212\_EXQ5\_AnMi\_QC\_HCMVp1\_10  
 Scan number: 44445  
 Protein: ORFL172W + NC\_006273.2[105961,109027]+ <unknown description>; ORFL159W.iORF2 + NC\_006273.2[108854,109027]+ <unknown description>  
 Peptide score: 81.43  
 Method: FTMS; HCD

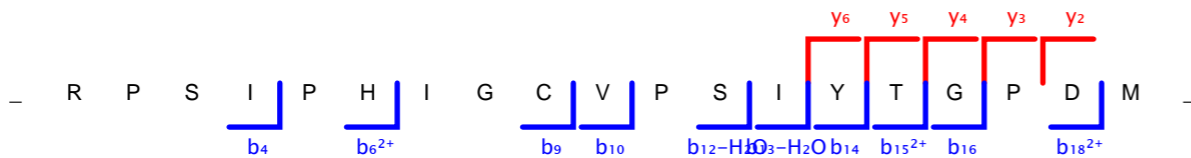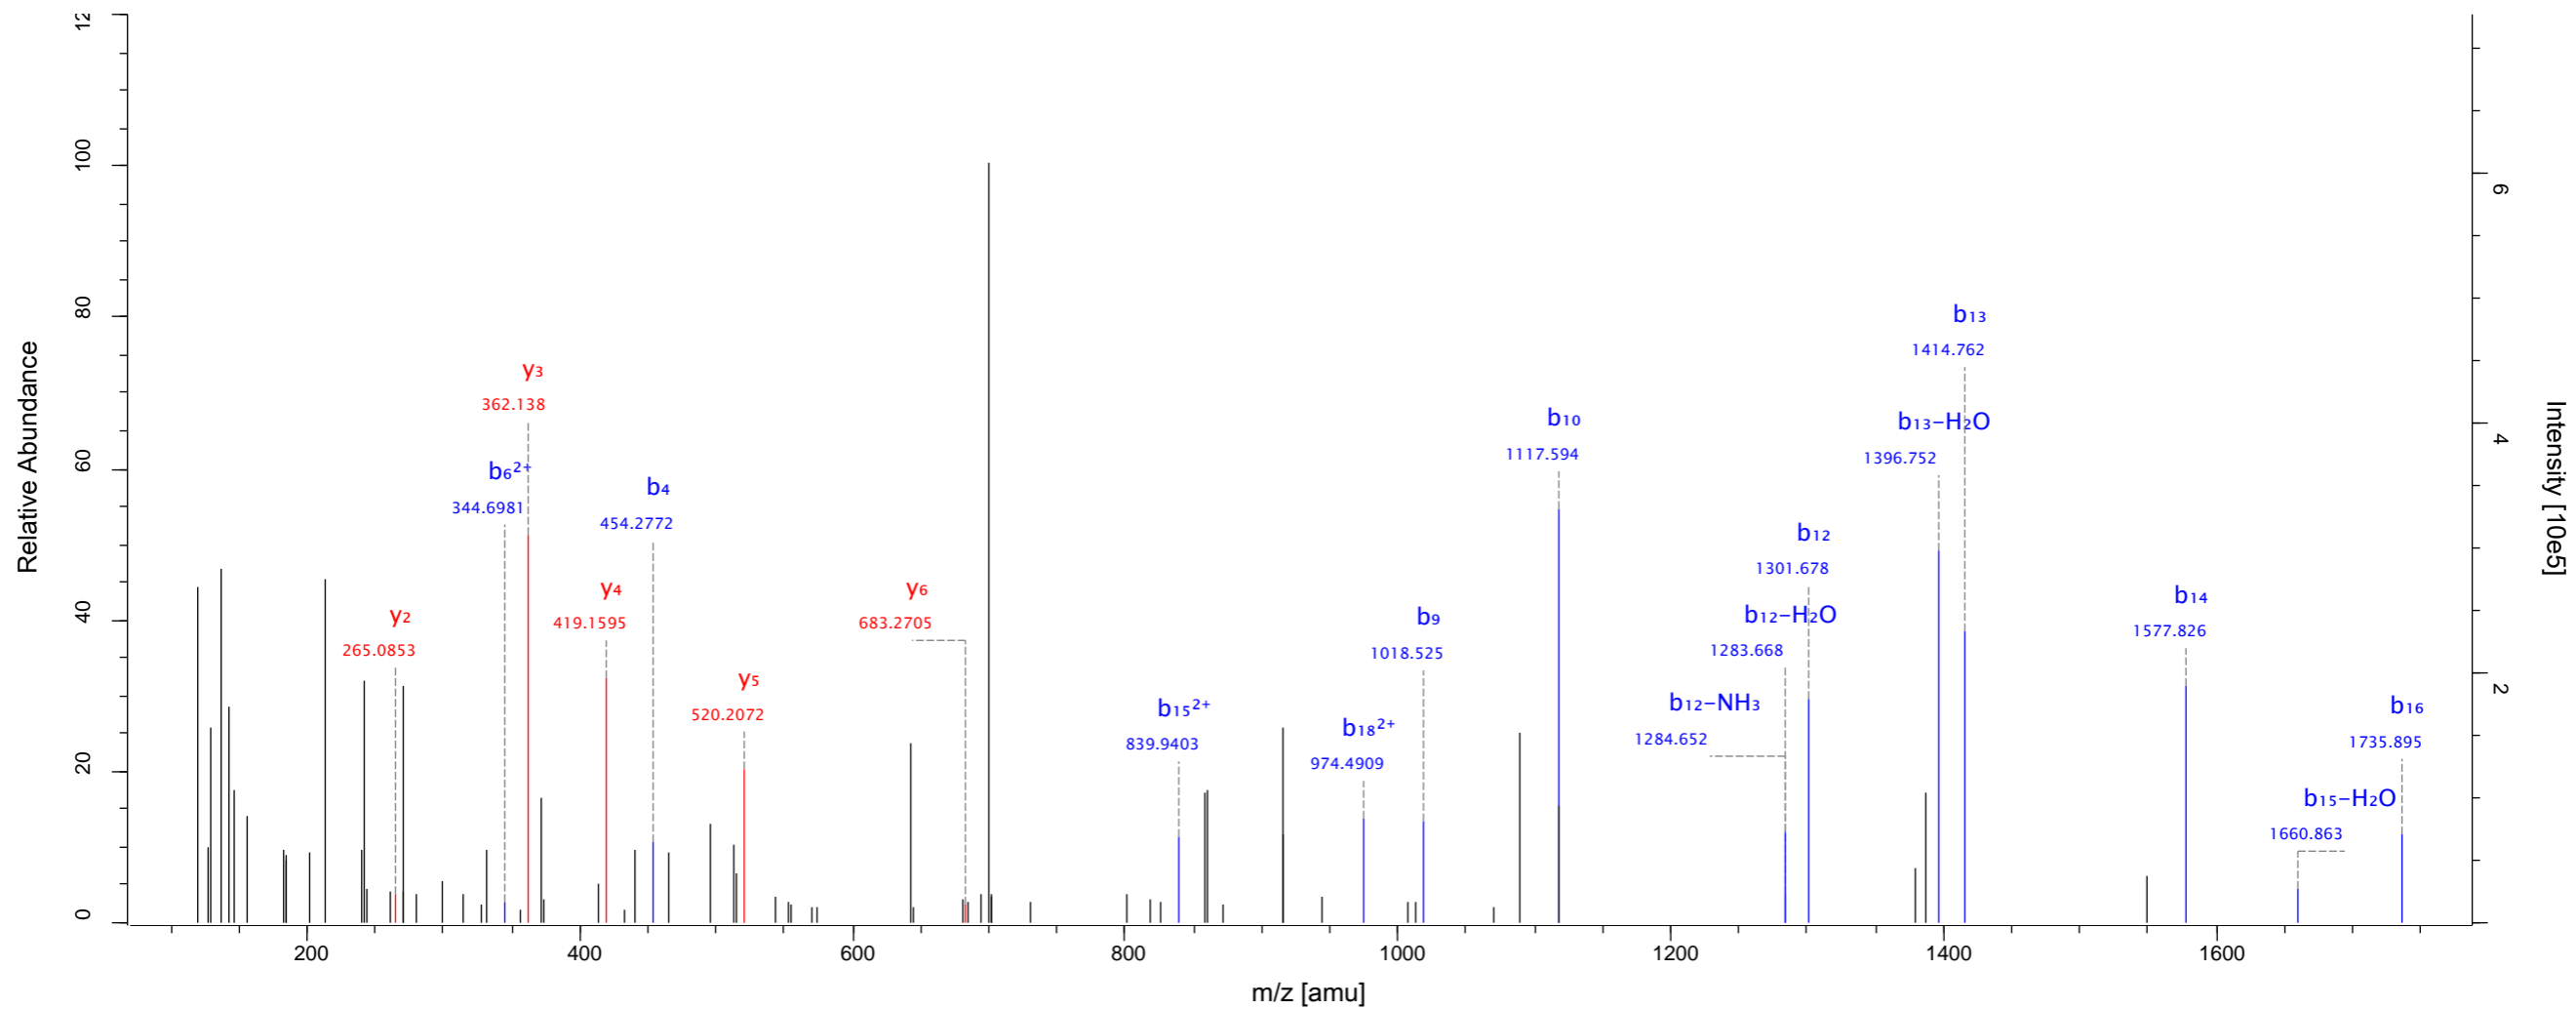

Raw file: 20111212\_EXQ5\_AnMi\_QC\_HCMVp11\_10  
 Scan number: 50163  
 Protein: ORFL223W + NC\_006273.2[139458,139730]+ <unknown description>  
 Peptide score: 212.83  
 Method: FTMS; HCD

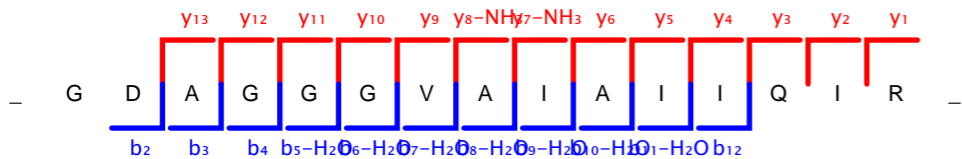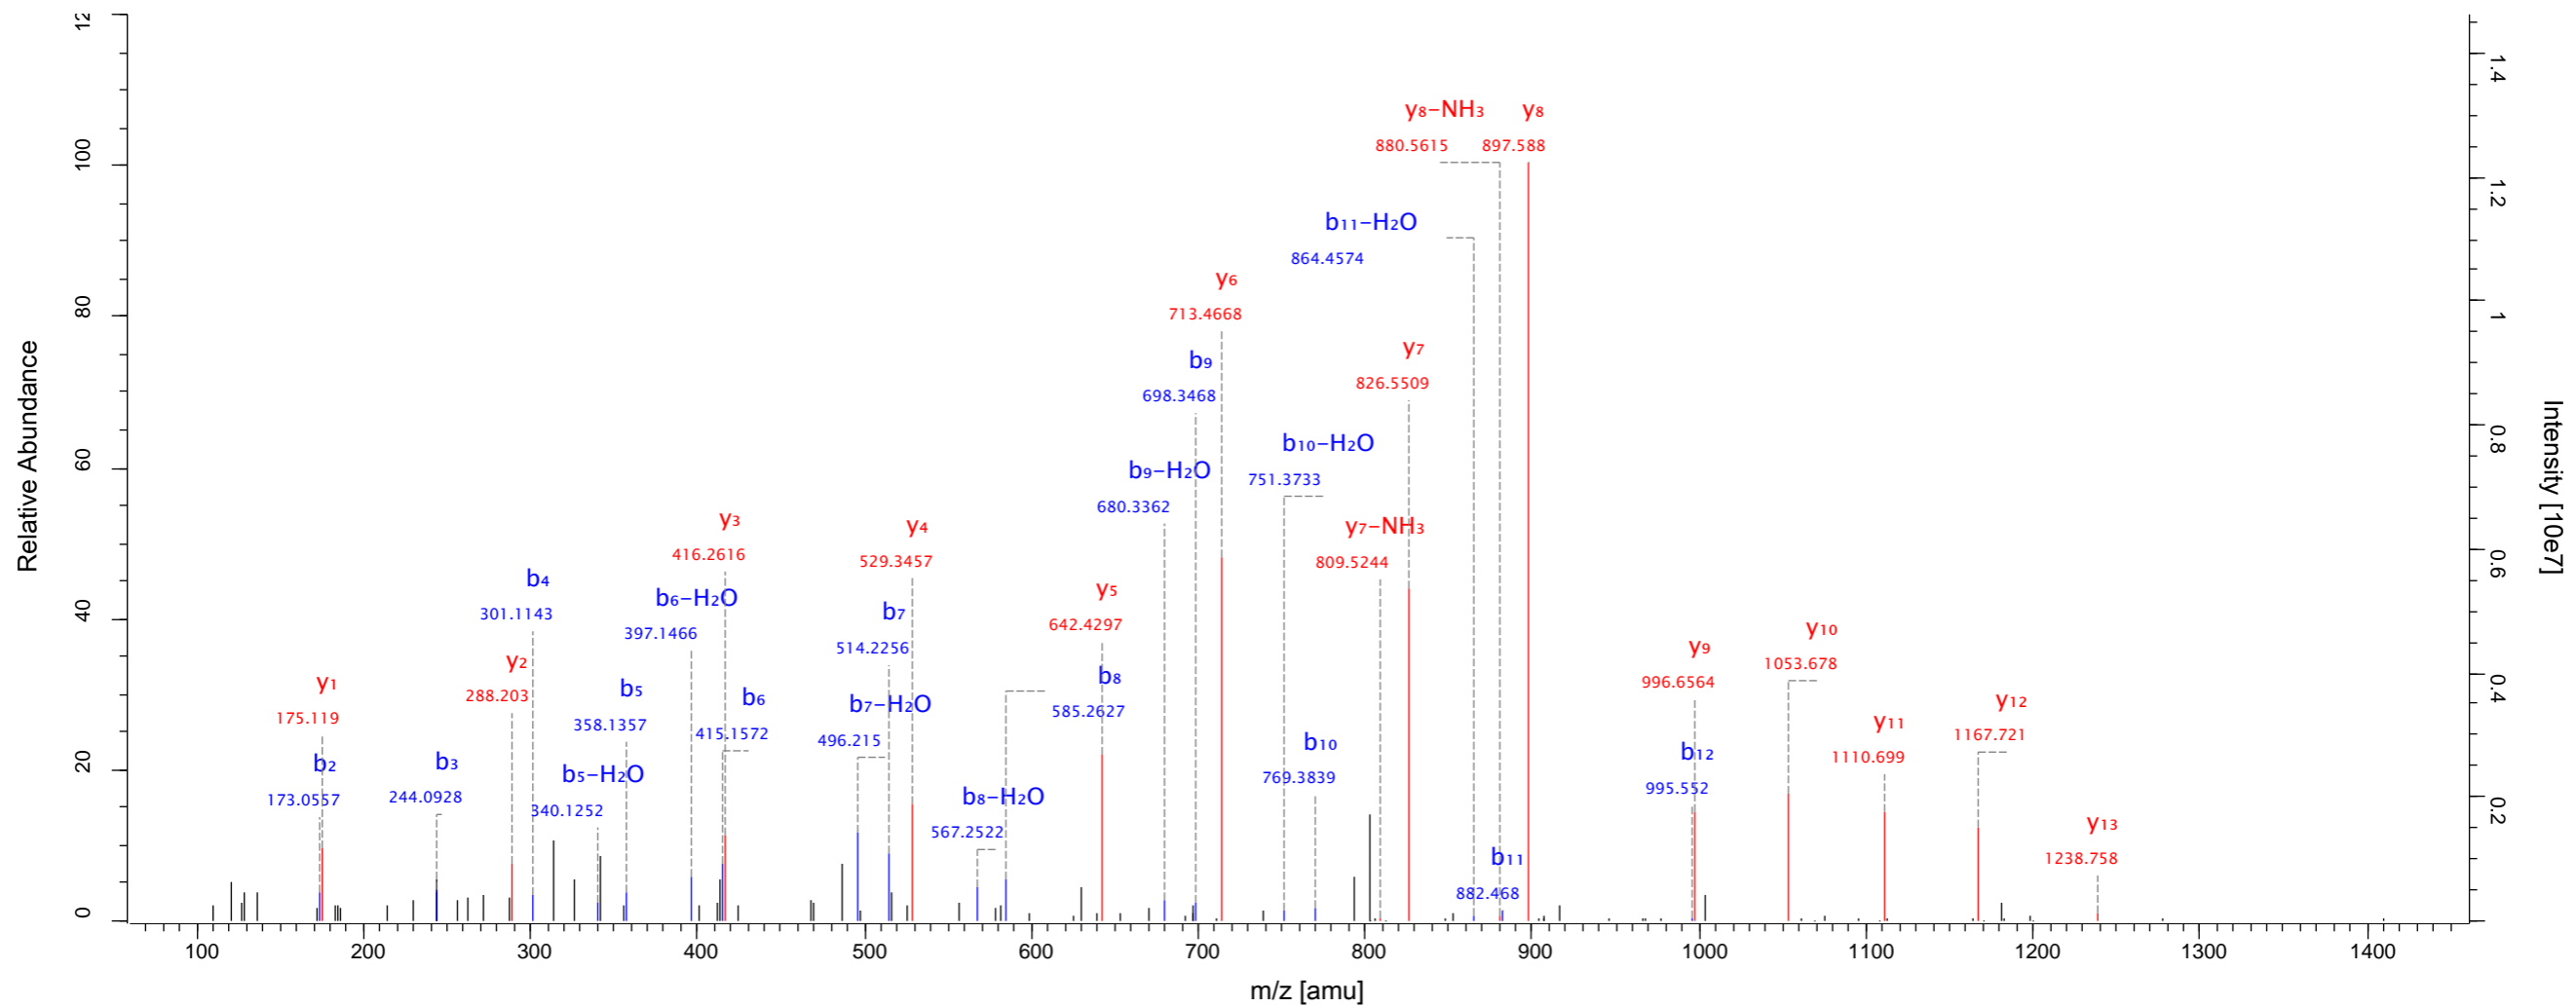

Raw file: 20111212\_EXQ5\_AnMi\_QC\_HCMVp1\_10  
 Scan number: 50473  
 Protein: ORFL294W.iORF1 + NC\_006273.2[183230,193441]+ <unknown description>; ORFL294W + NC\_006273.2[183230,193441]+ <unknown description>  
 Peptide score: 256.26  
 Method: FTMS; HCD

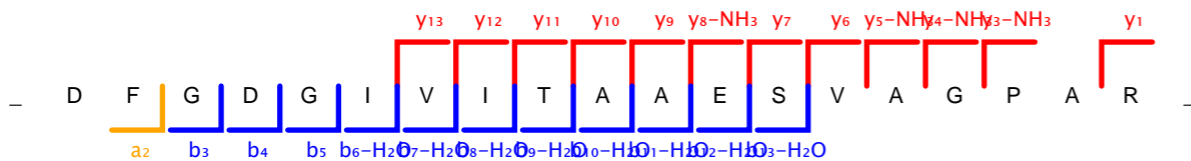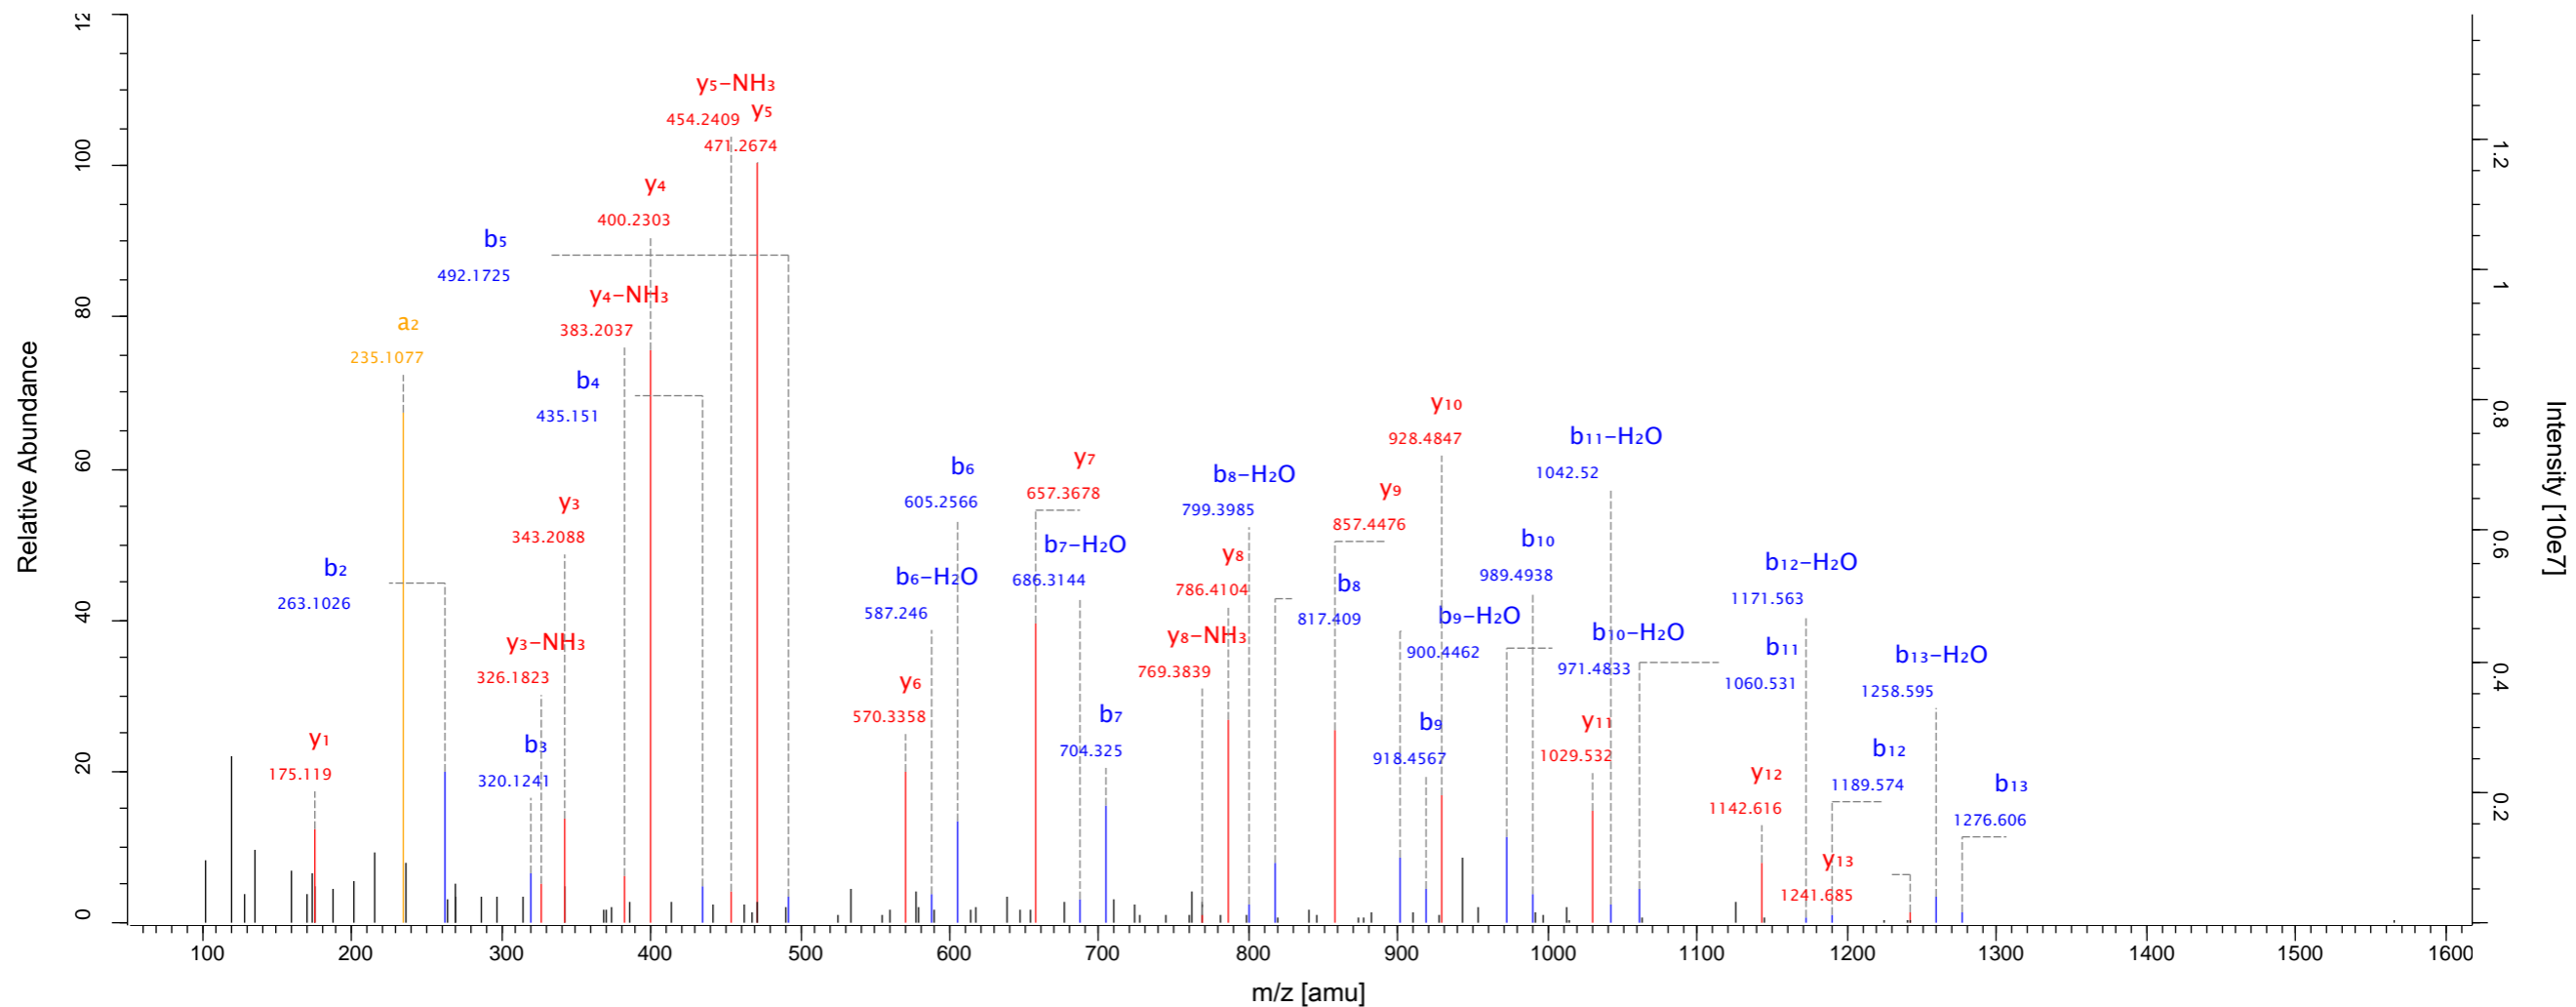

Raw file: 20111212\_EXQ5\_AnMi\_QC\_HCMVp1\_10  
Scan number: 50512  
Protein: ORFL161C.iORF2 - NC\_006273.2[101063,101479]- <unknown description>  
Peptide score: 140.16  
Method: FTMS; HCD

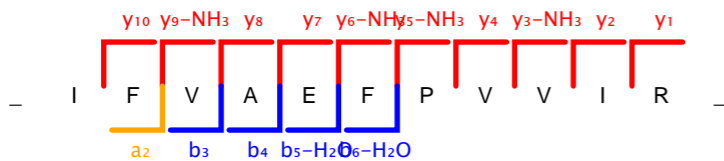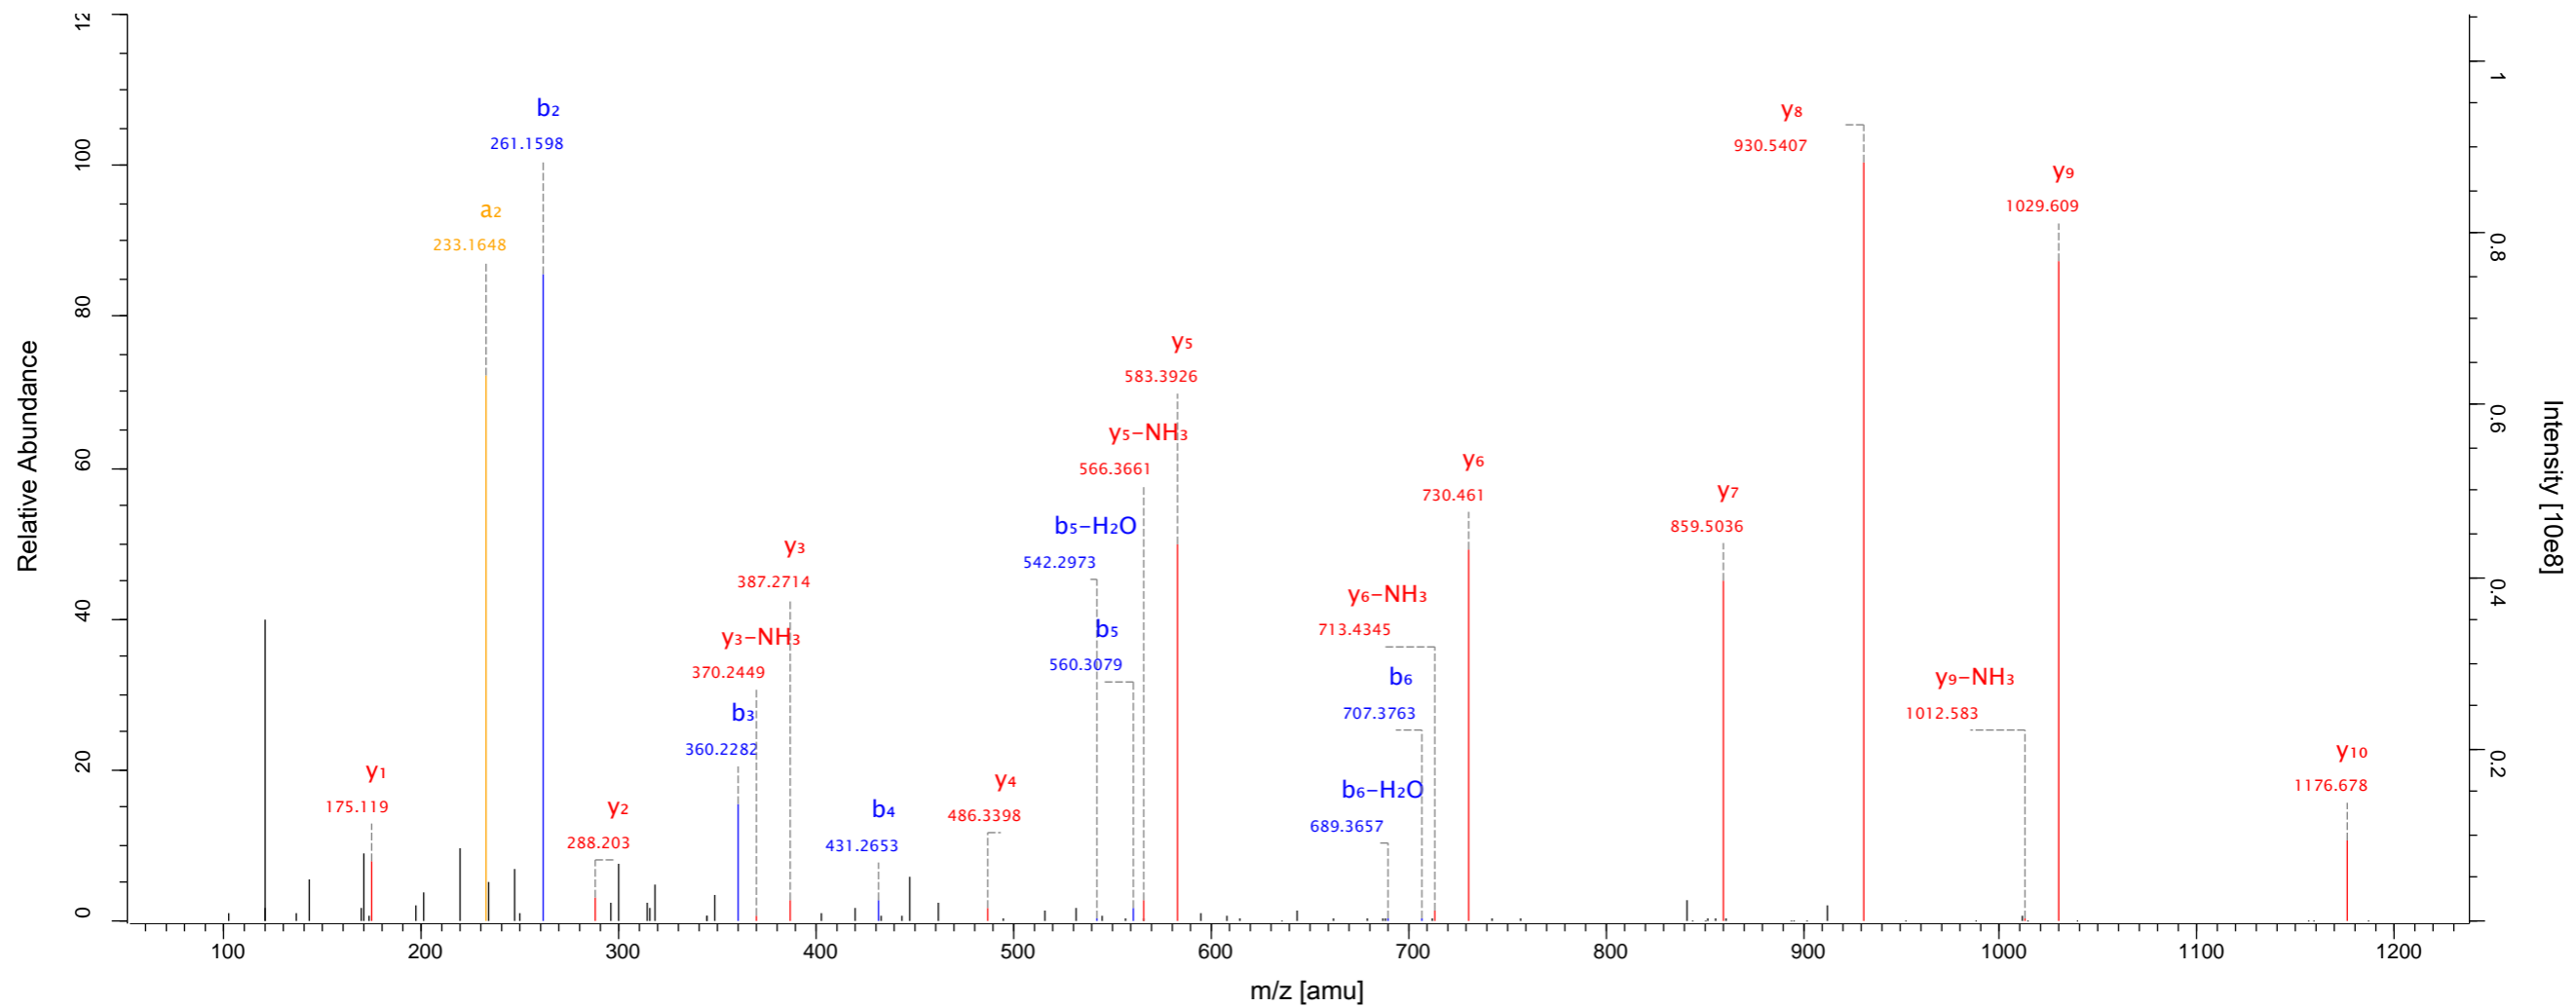

Raw file: 20111212\_EXQ5\_AnMi\_QC\_HCMVp1\_10  
 Scan number: 8645  
 Protein: ORFS359W + NC\_006273.2[221986,222303]+ <unknown description>  
 Peptide score: 82.01  
 Method: FTMS; HCD

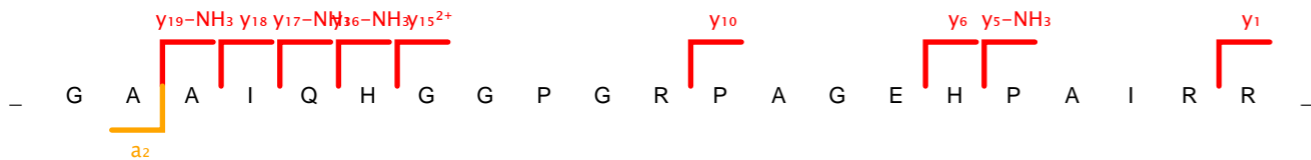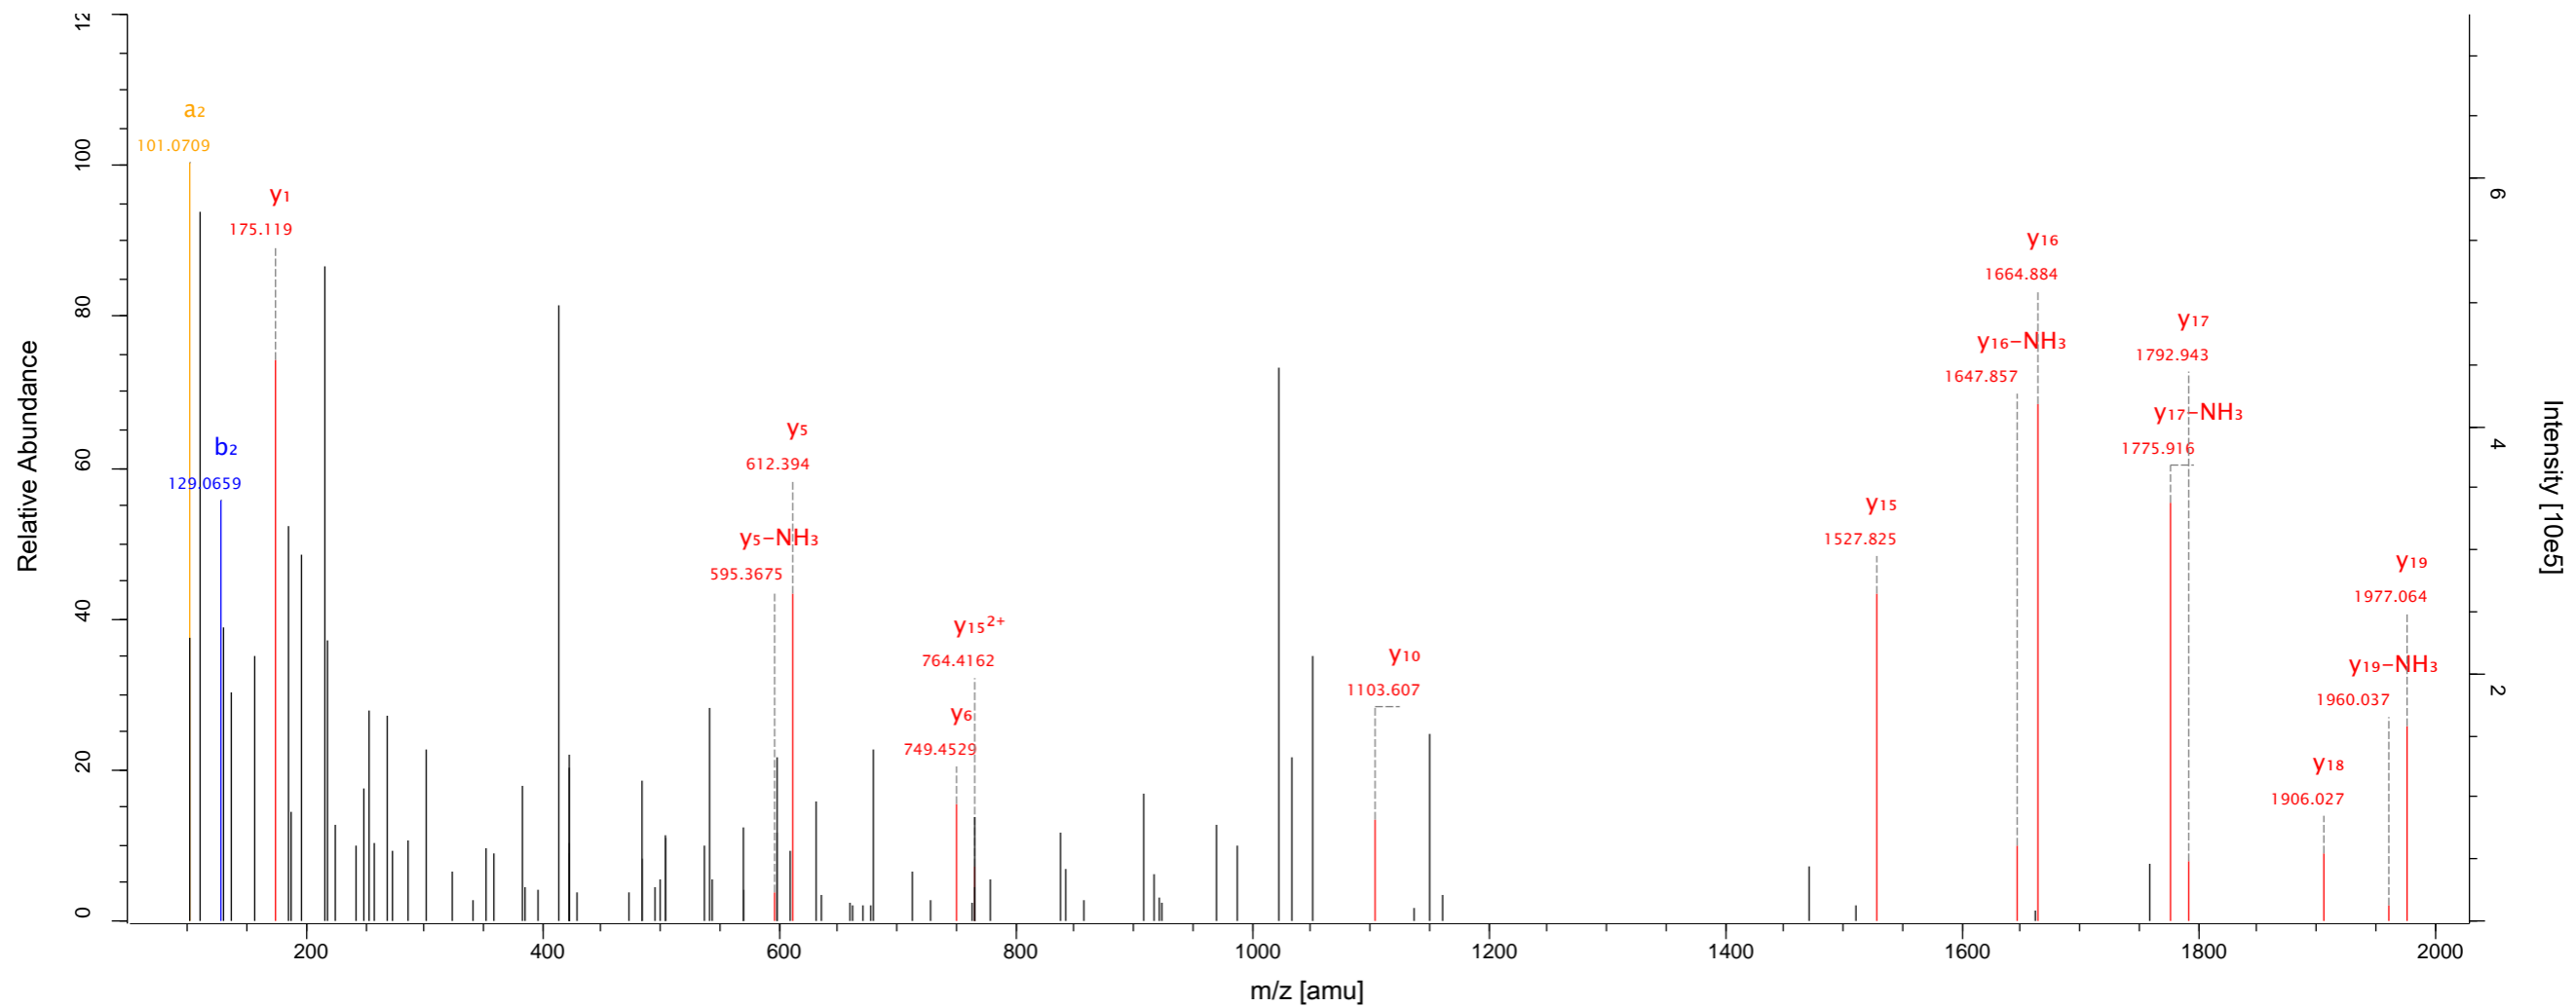



Raw file: 20111212\_EXQ5\_AnMi\_QC\_HCMVp1\_11  
Scan number: 11282  
Protein: ORFL119C - NC\_006273.2[63363,63800]- <unknown description>  
Peptide score: 185.77  
Method: FTMS; HCD

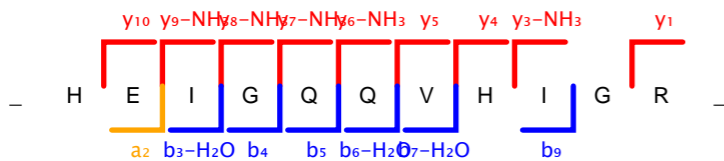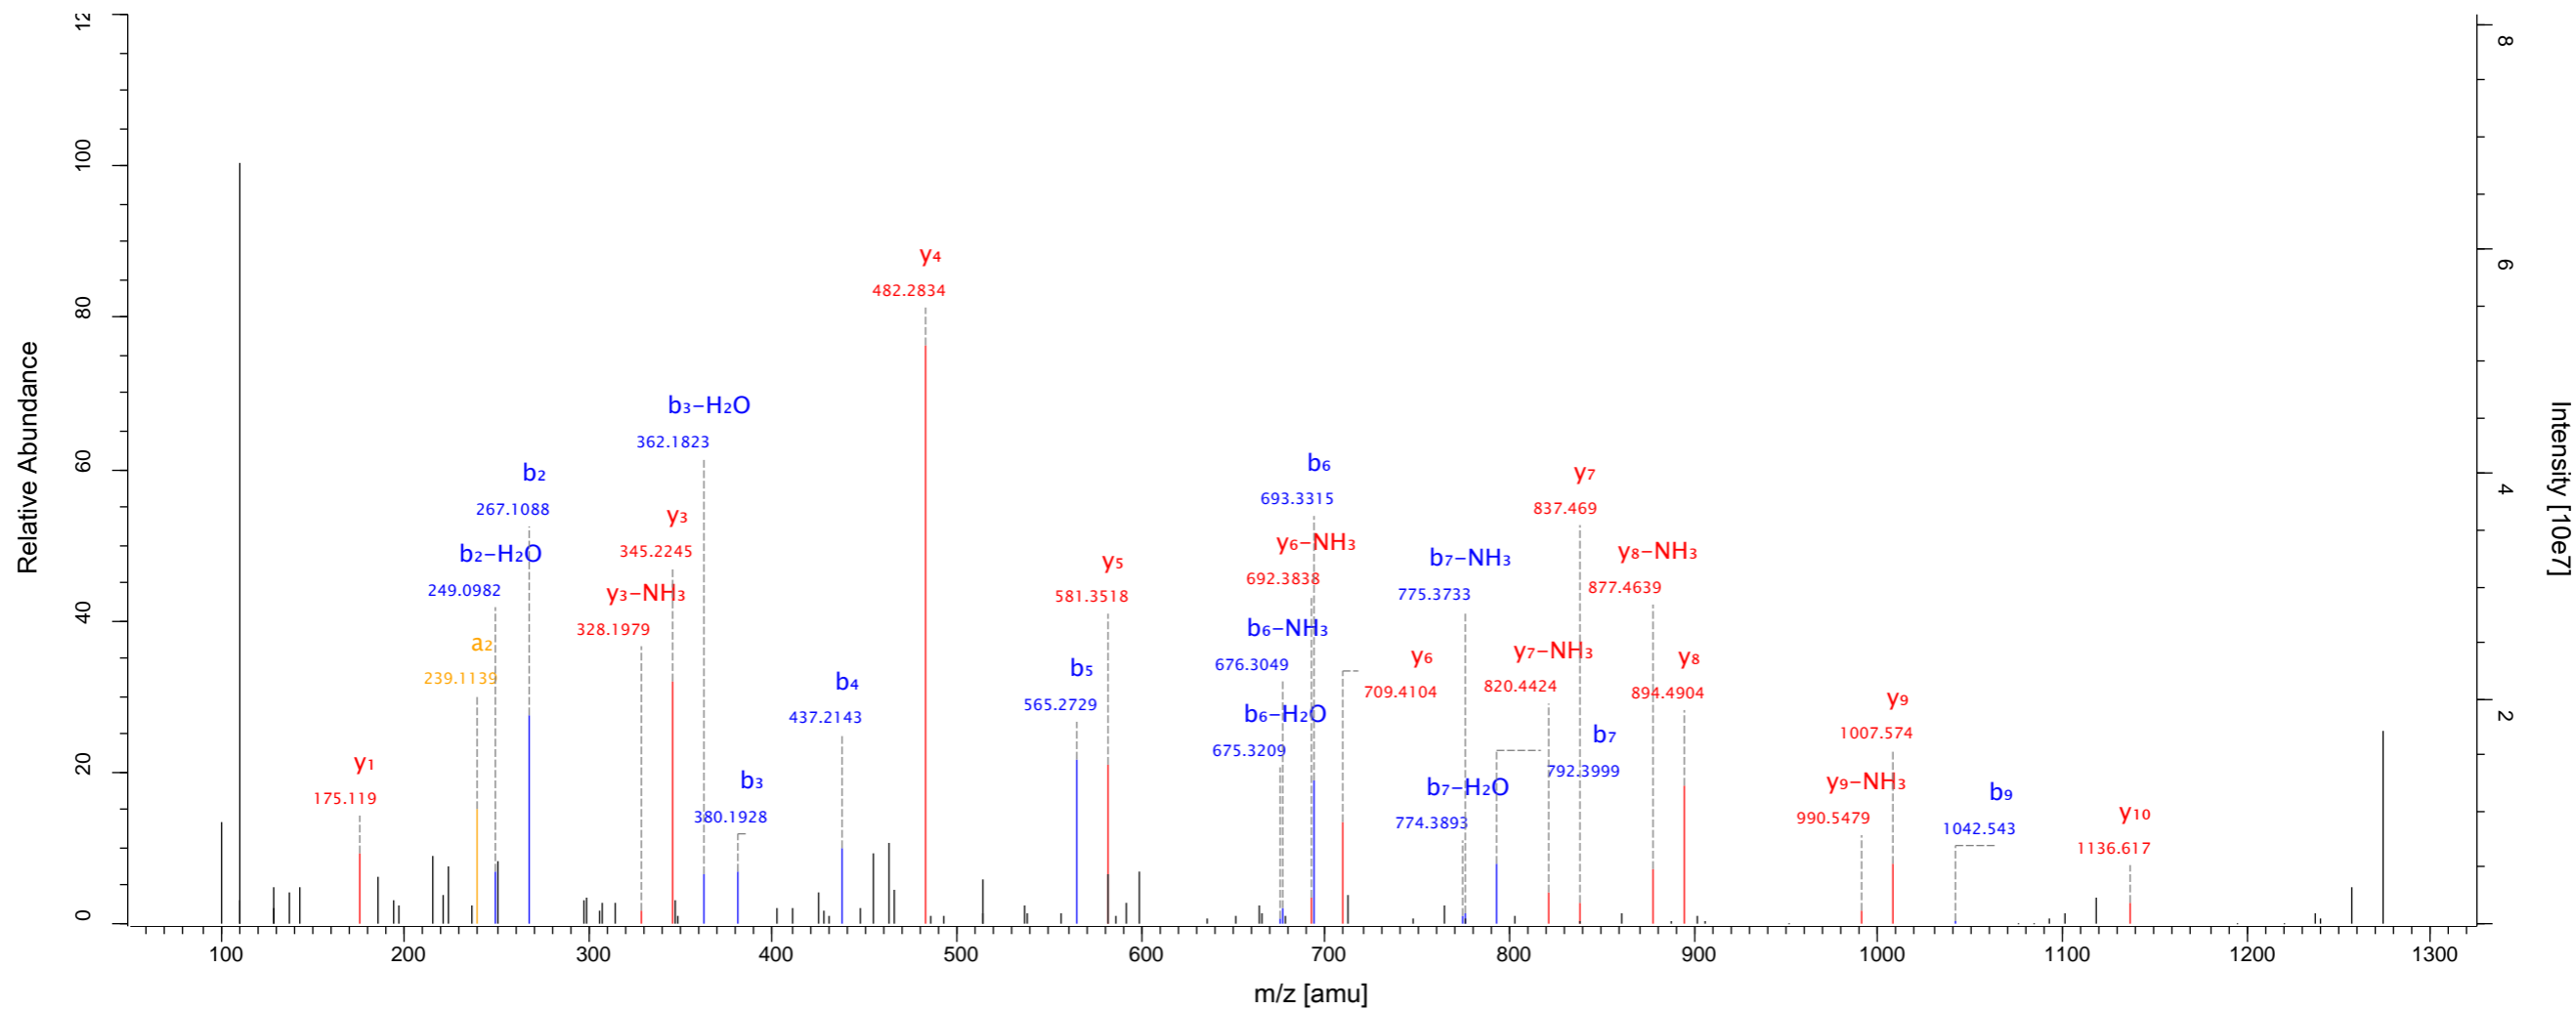

Raw file: 20111212\_EXQ5\_AnMi\_QC\_HCMVp11\_11  
 Scan number: 11667  
 Protein: ORFL86W + NC\_006273.2[38059,38538]+ <unknown description>  
 Peptide score: 179.19  
 Method: FTMS; HCD

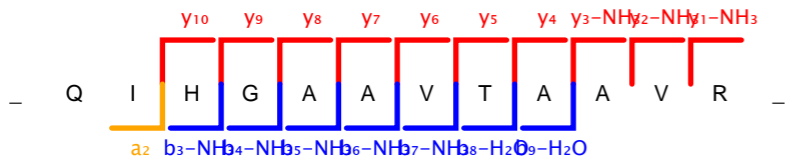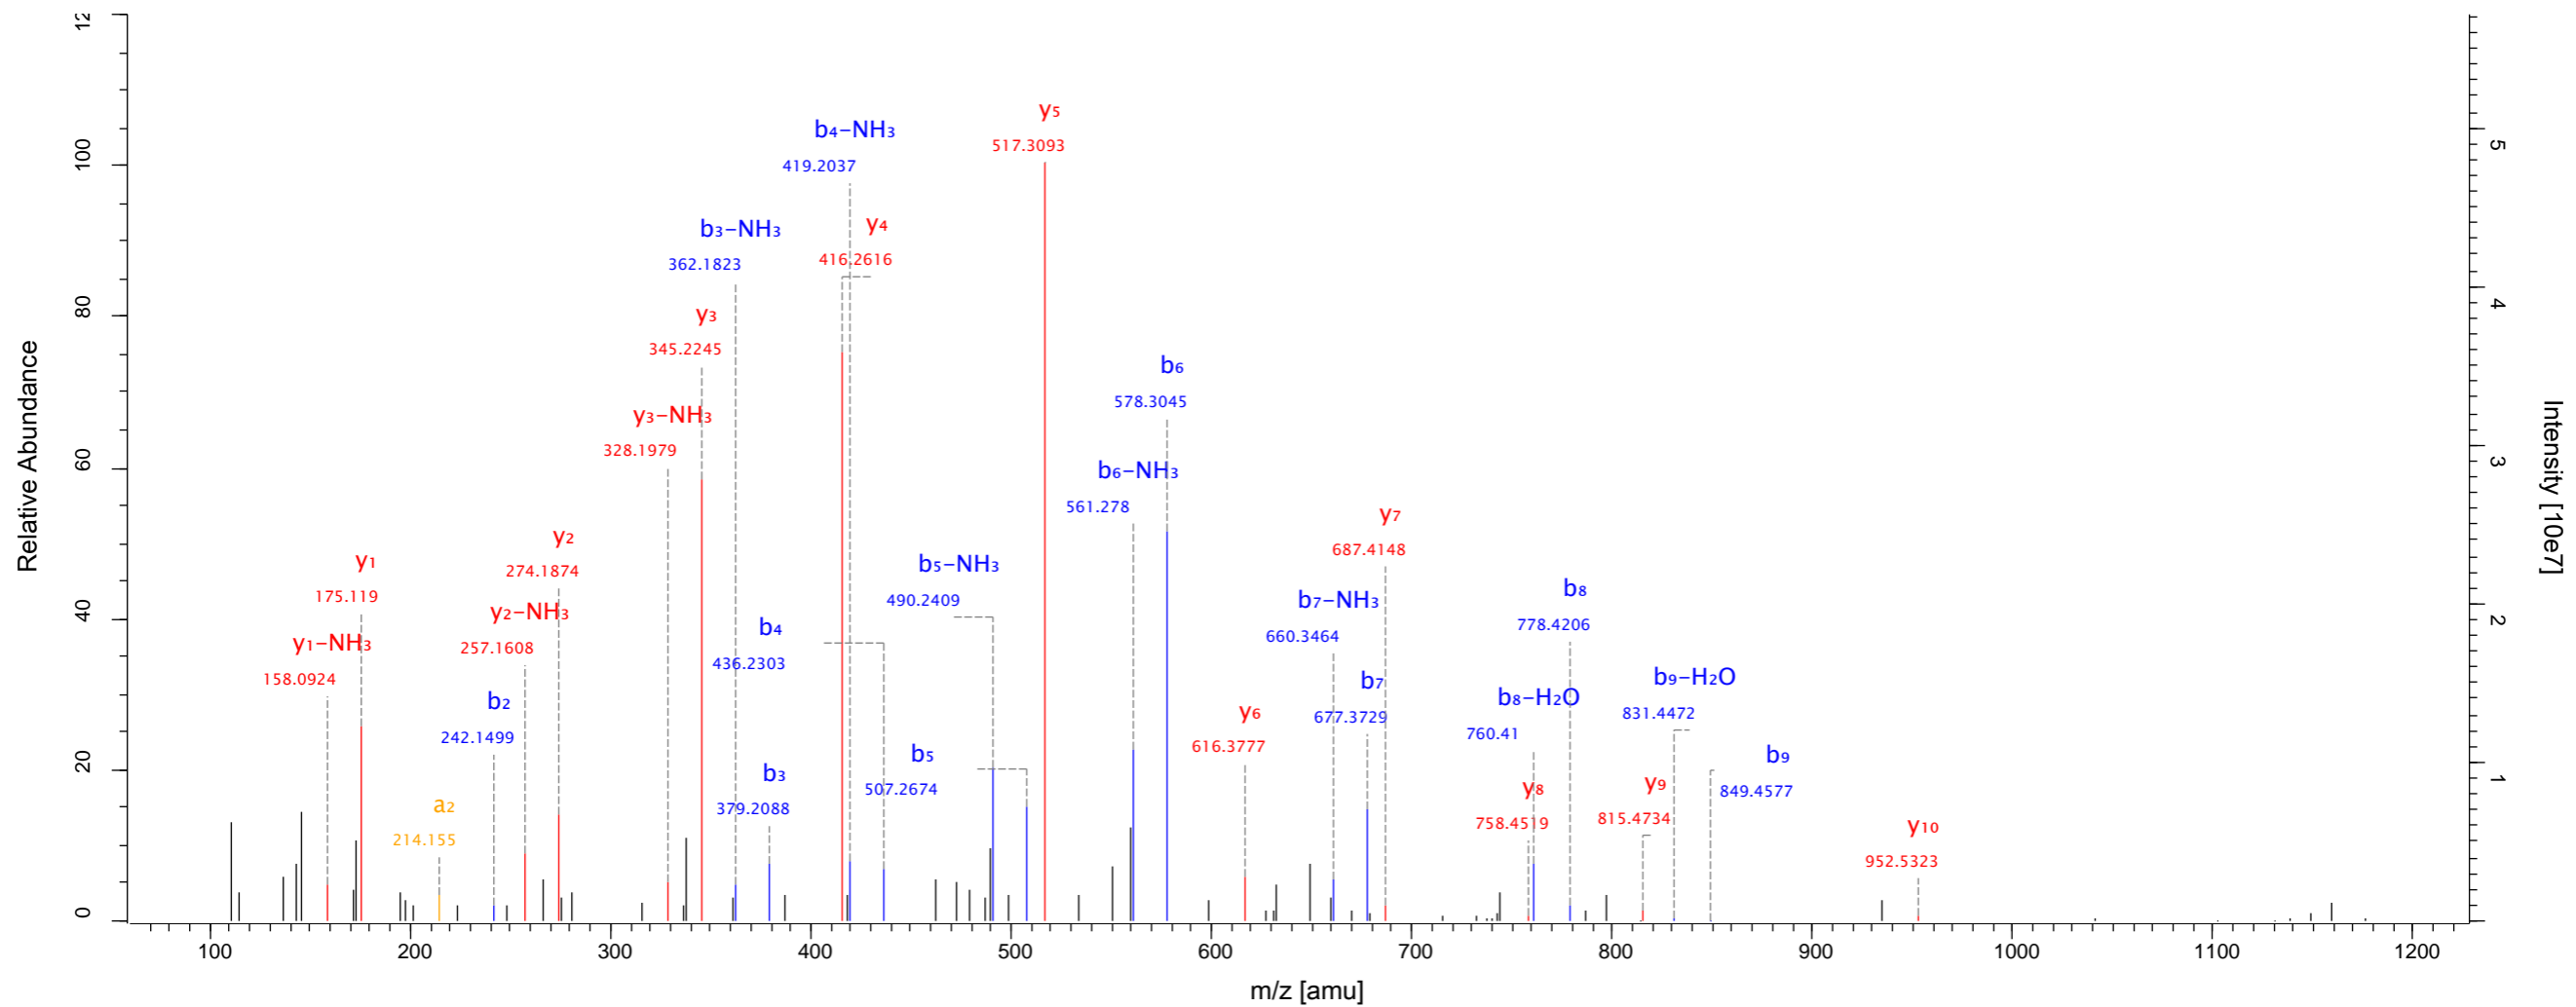

Raw file: 20111212\_EXQ5\_AnMi\_QC\_HCMVp11\_11  
 Scan number: 12708  
 Protein: ORFL224C.iORF1 - NC\_006273.2[134354,134734]- <unknown description>  
 Peptide score: 164.33  
 Method: FTMS; HCD

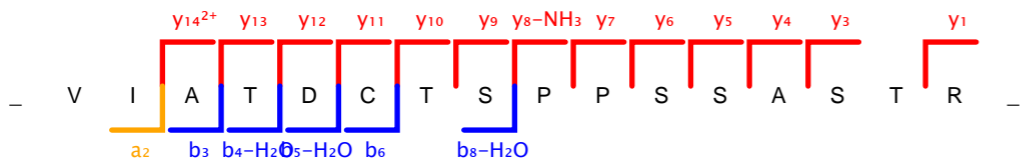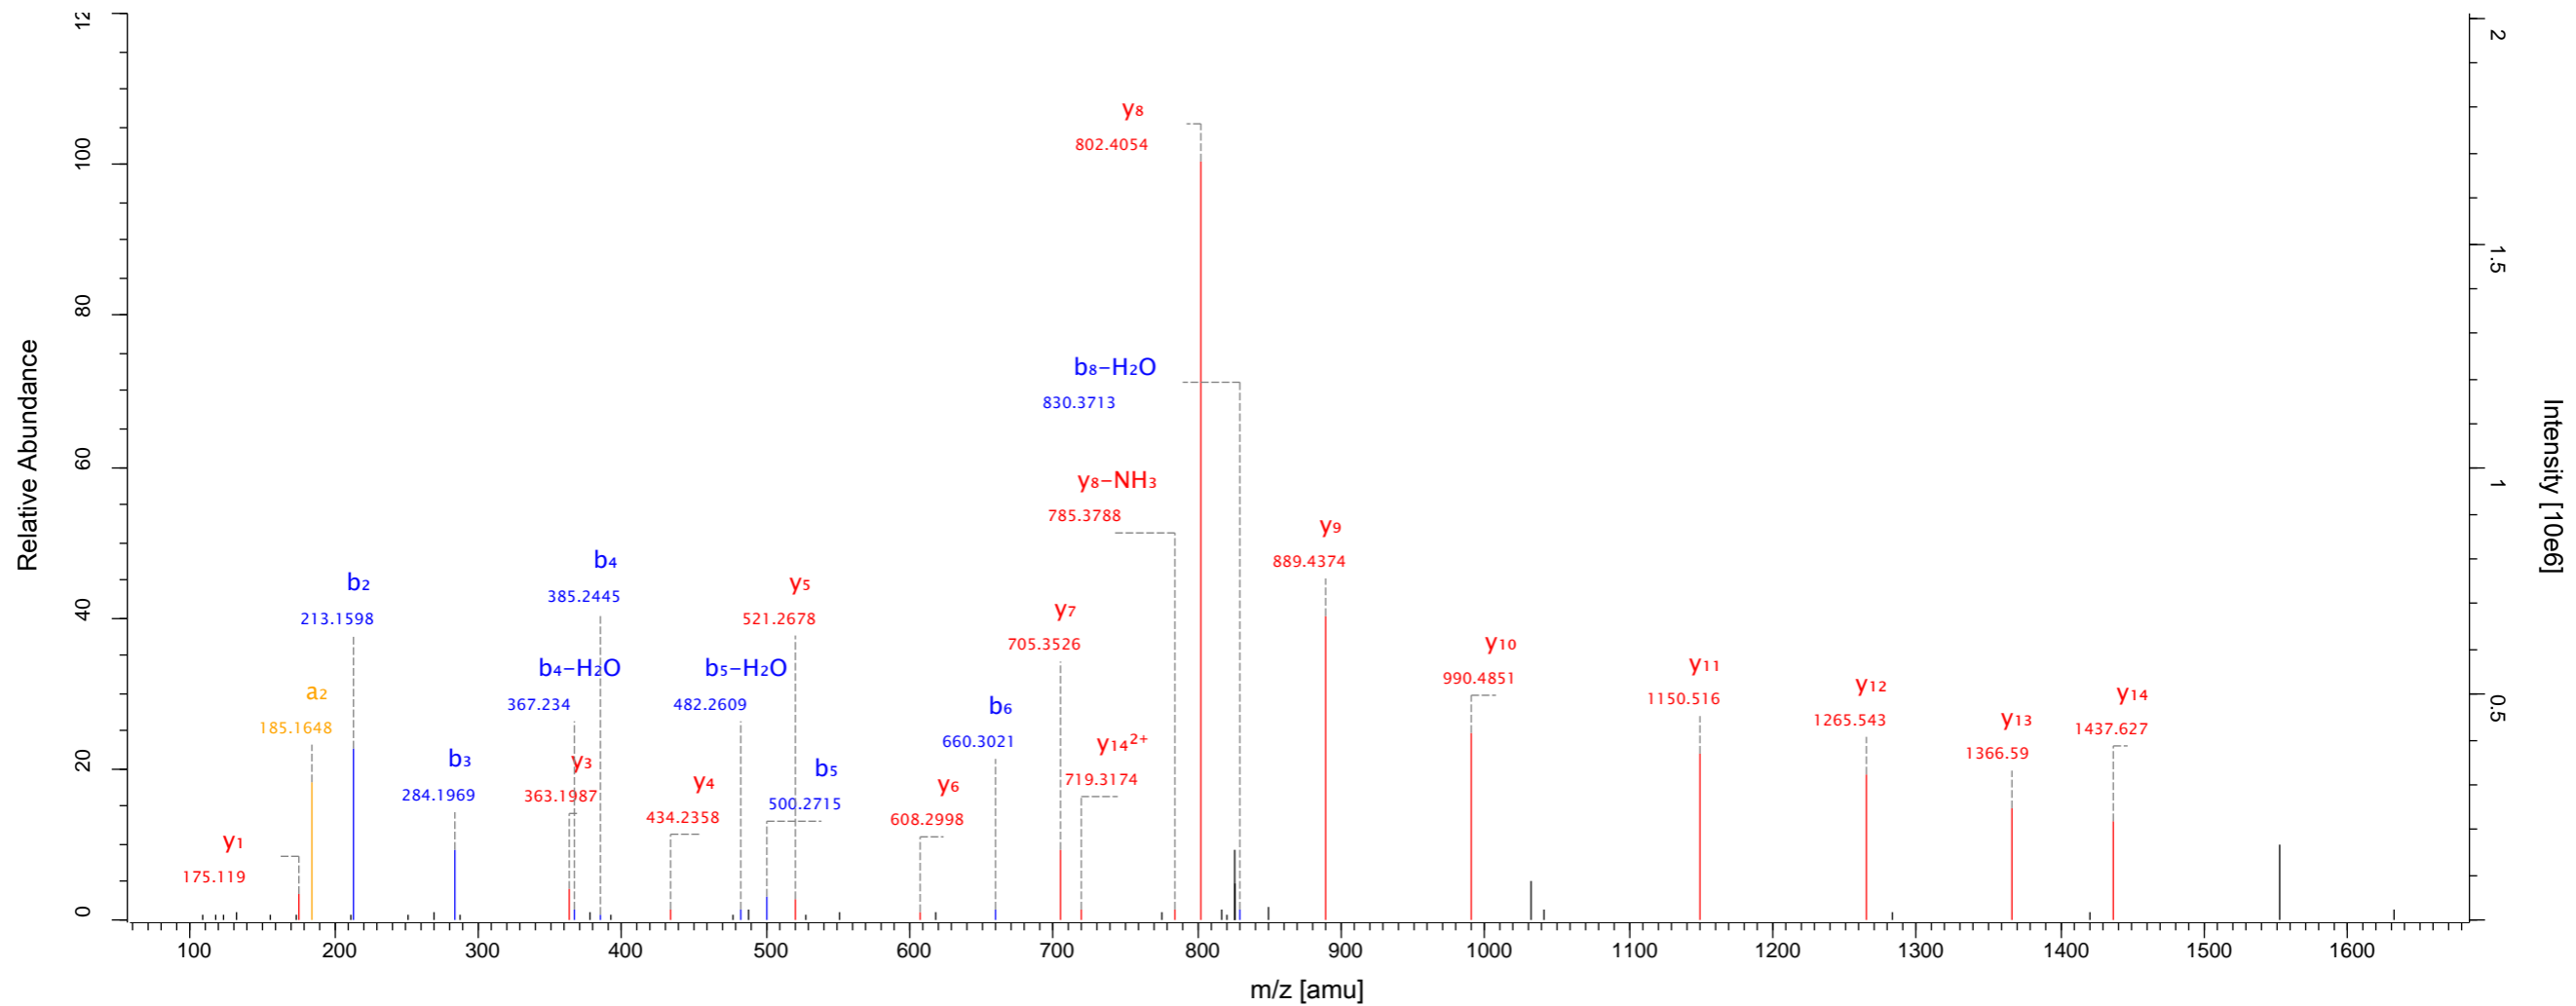

Raw file: 20111212\_EXQ5\_AnMi\_QC\_HCMVp1\_11  
Scan number: 12833  
Protein: ORFL52C - NC\_006273.2[25013,25198]- <unknown description>  
Peptide score: 93.26  
Method: FTMS; HCD

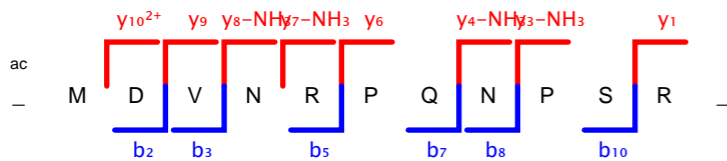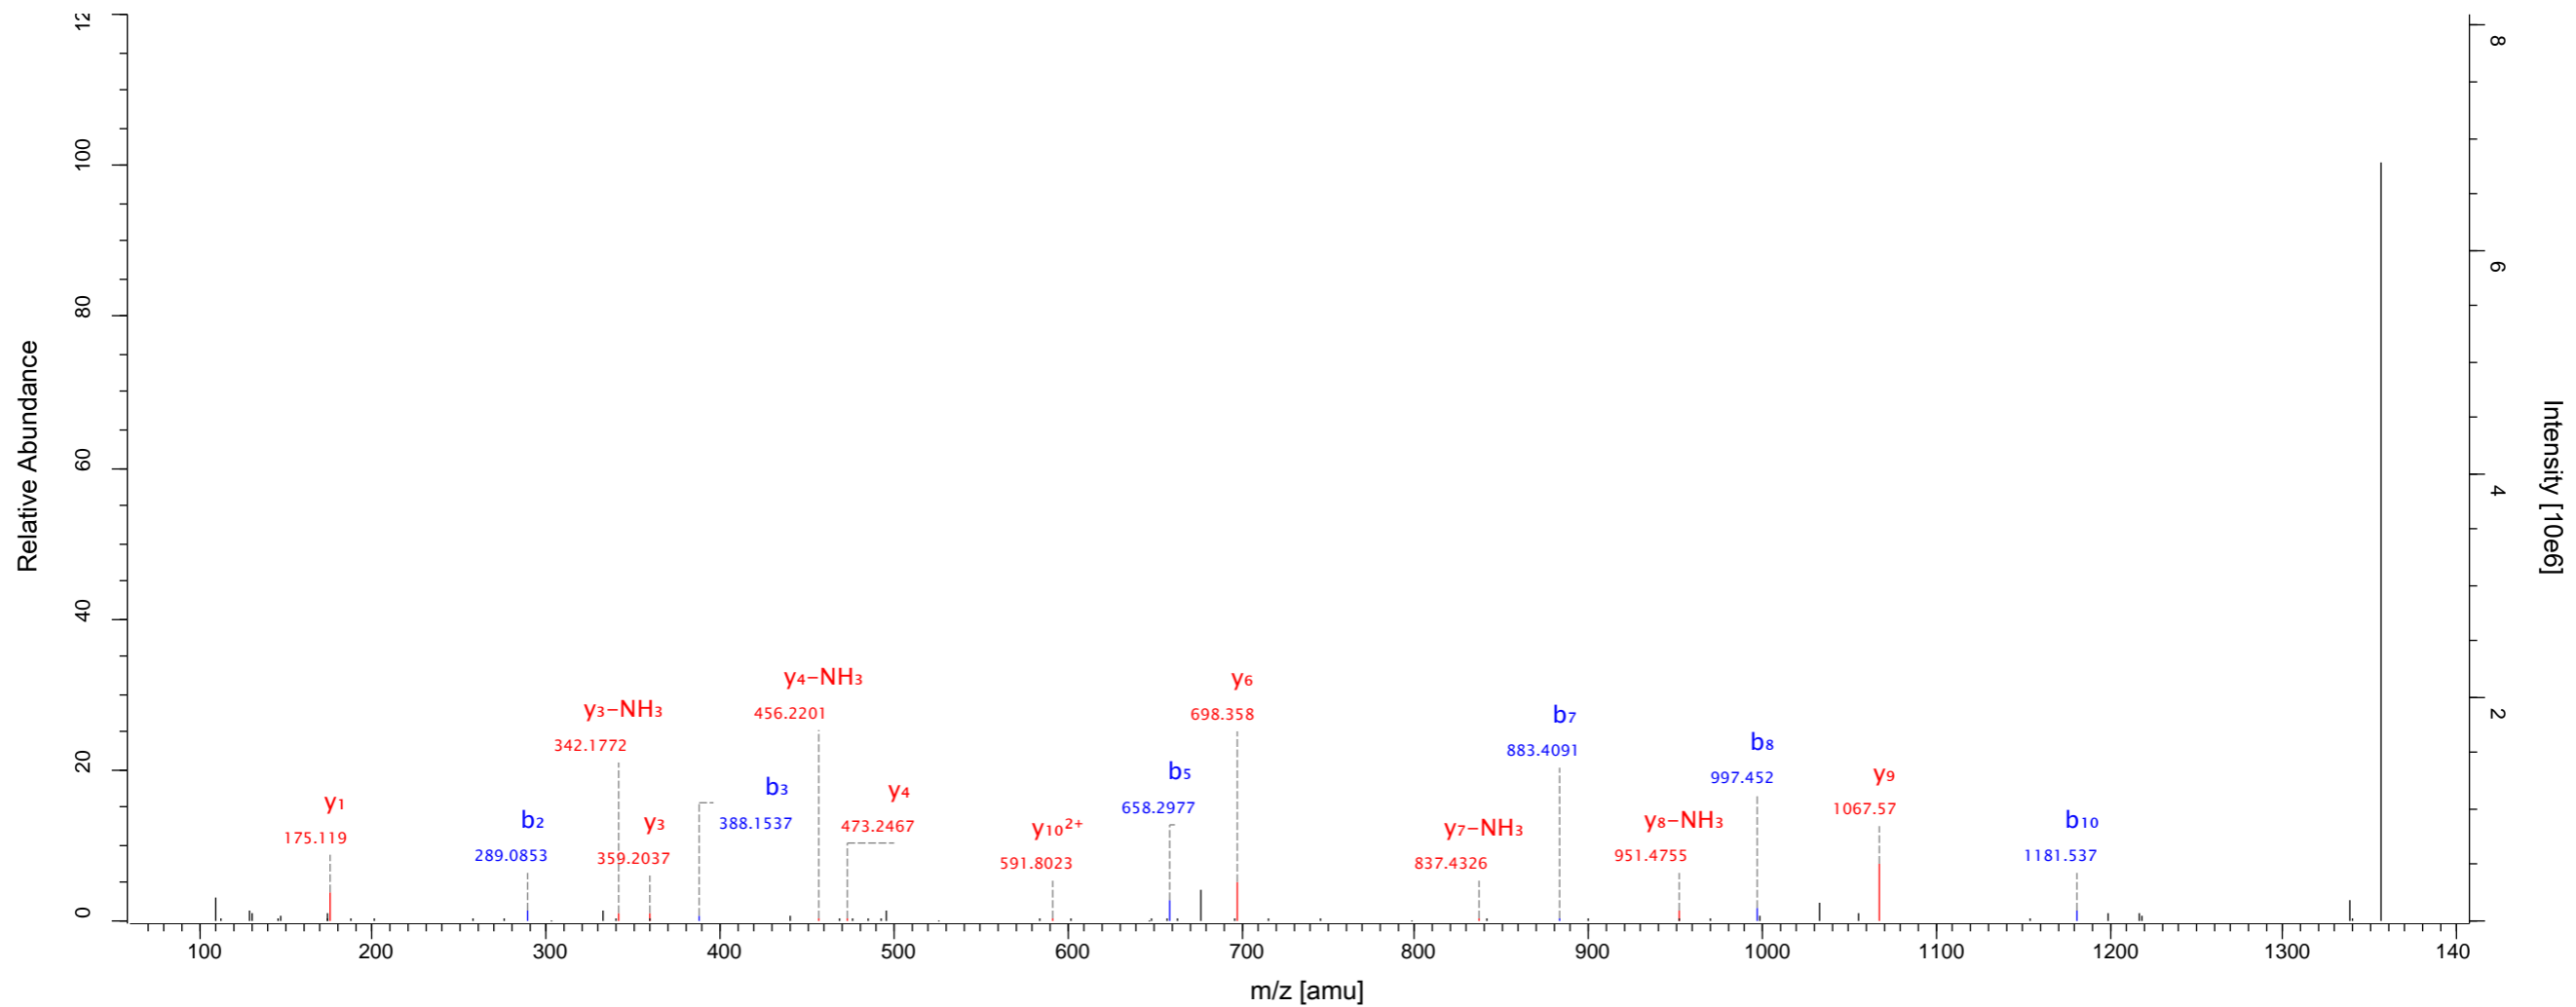

Raw file: 20111212\_EXQ5\_AnMi\_QC\_HCMVp1\_11  
Scan number: 15475  
Protein: ORFL27C - NC\_006273.2[7912,13003]- <unknown description>; ORFL27C.iORF1 - NC\_006273.2[7912,8184]- <unknown description>  
Peptide score: 108.09  
Method: FTMS; HCD

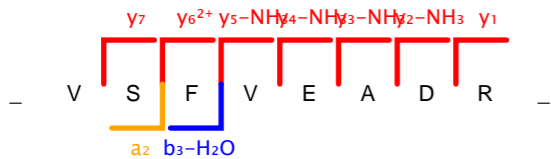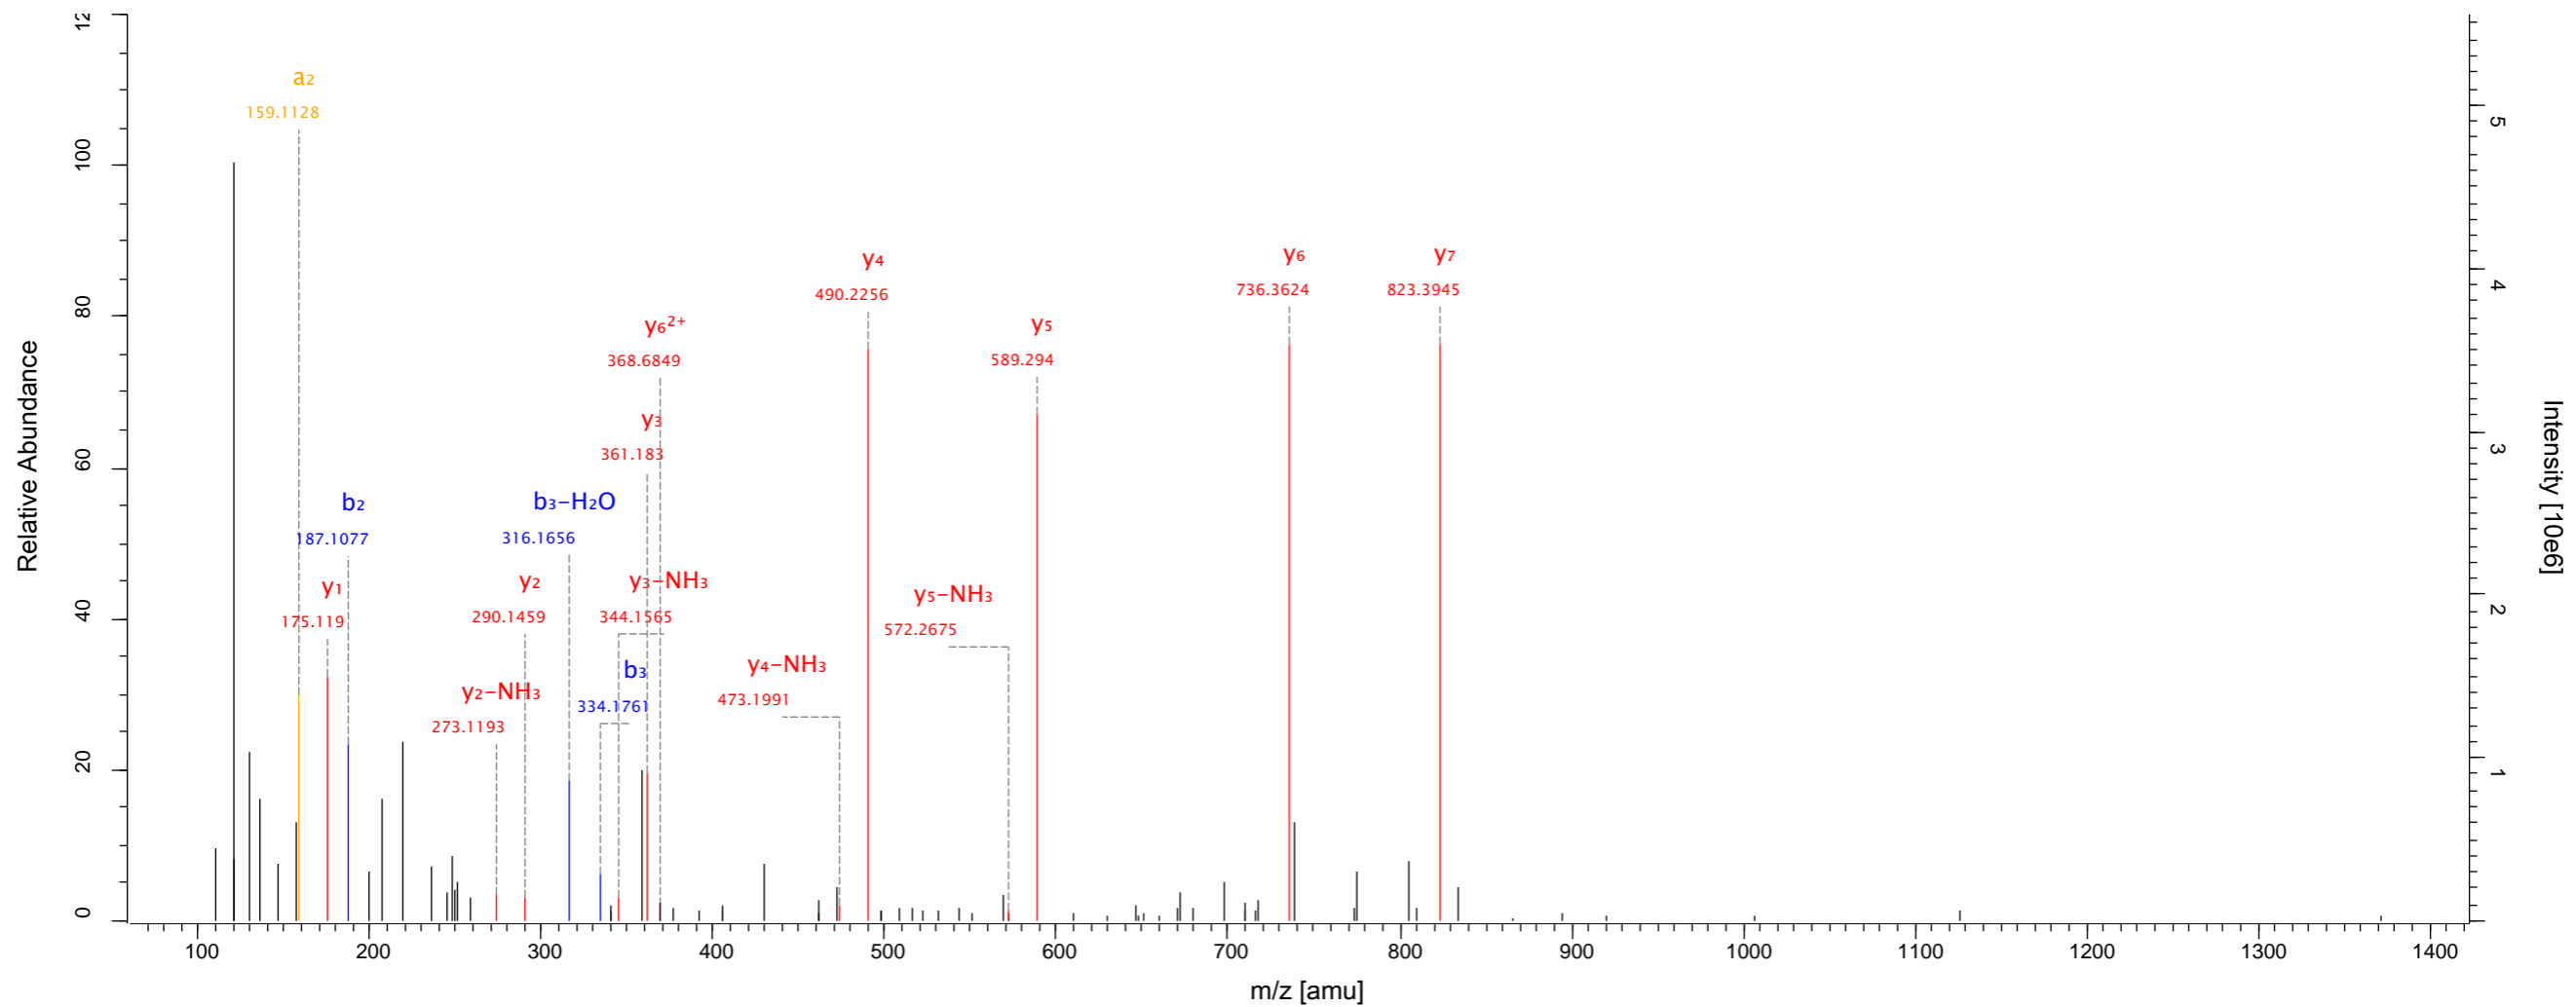

Raw file: 20111212\_EXQ5\_AnMi\_QC\_HCMVp1\_11  
Scan number: 16856  
Protein: ORFL149C.iORF2 - NC\_006273.2[91004,91471]- <unknown description>  
Peptide score: 97.07  
Method: FTMS; HCD

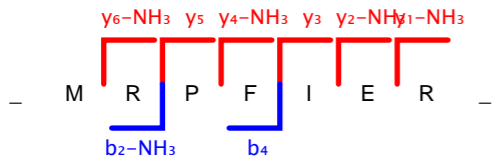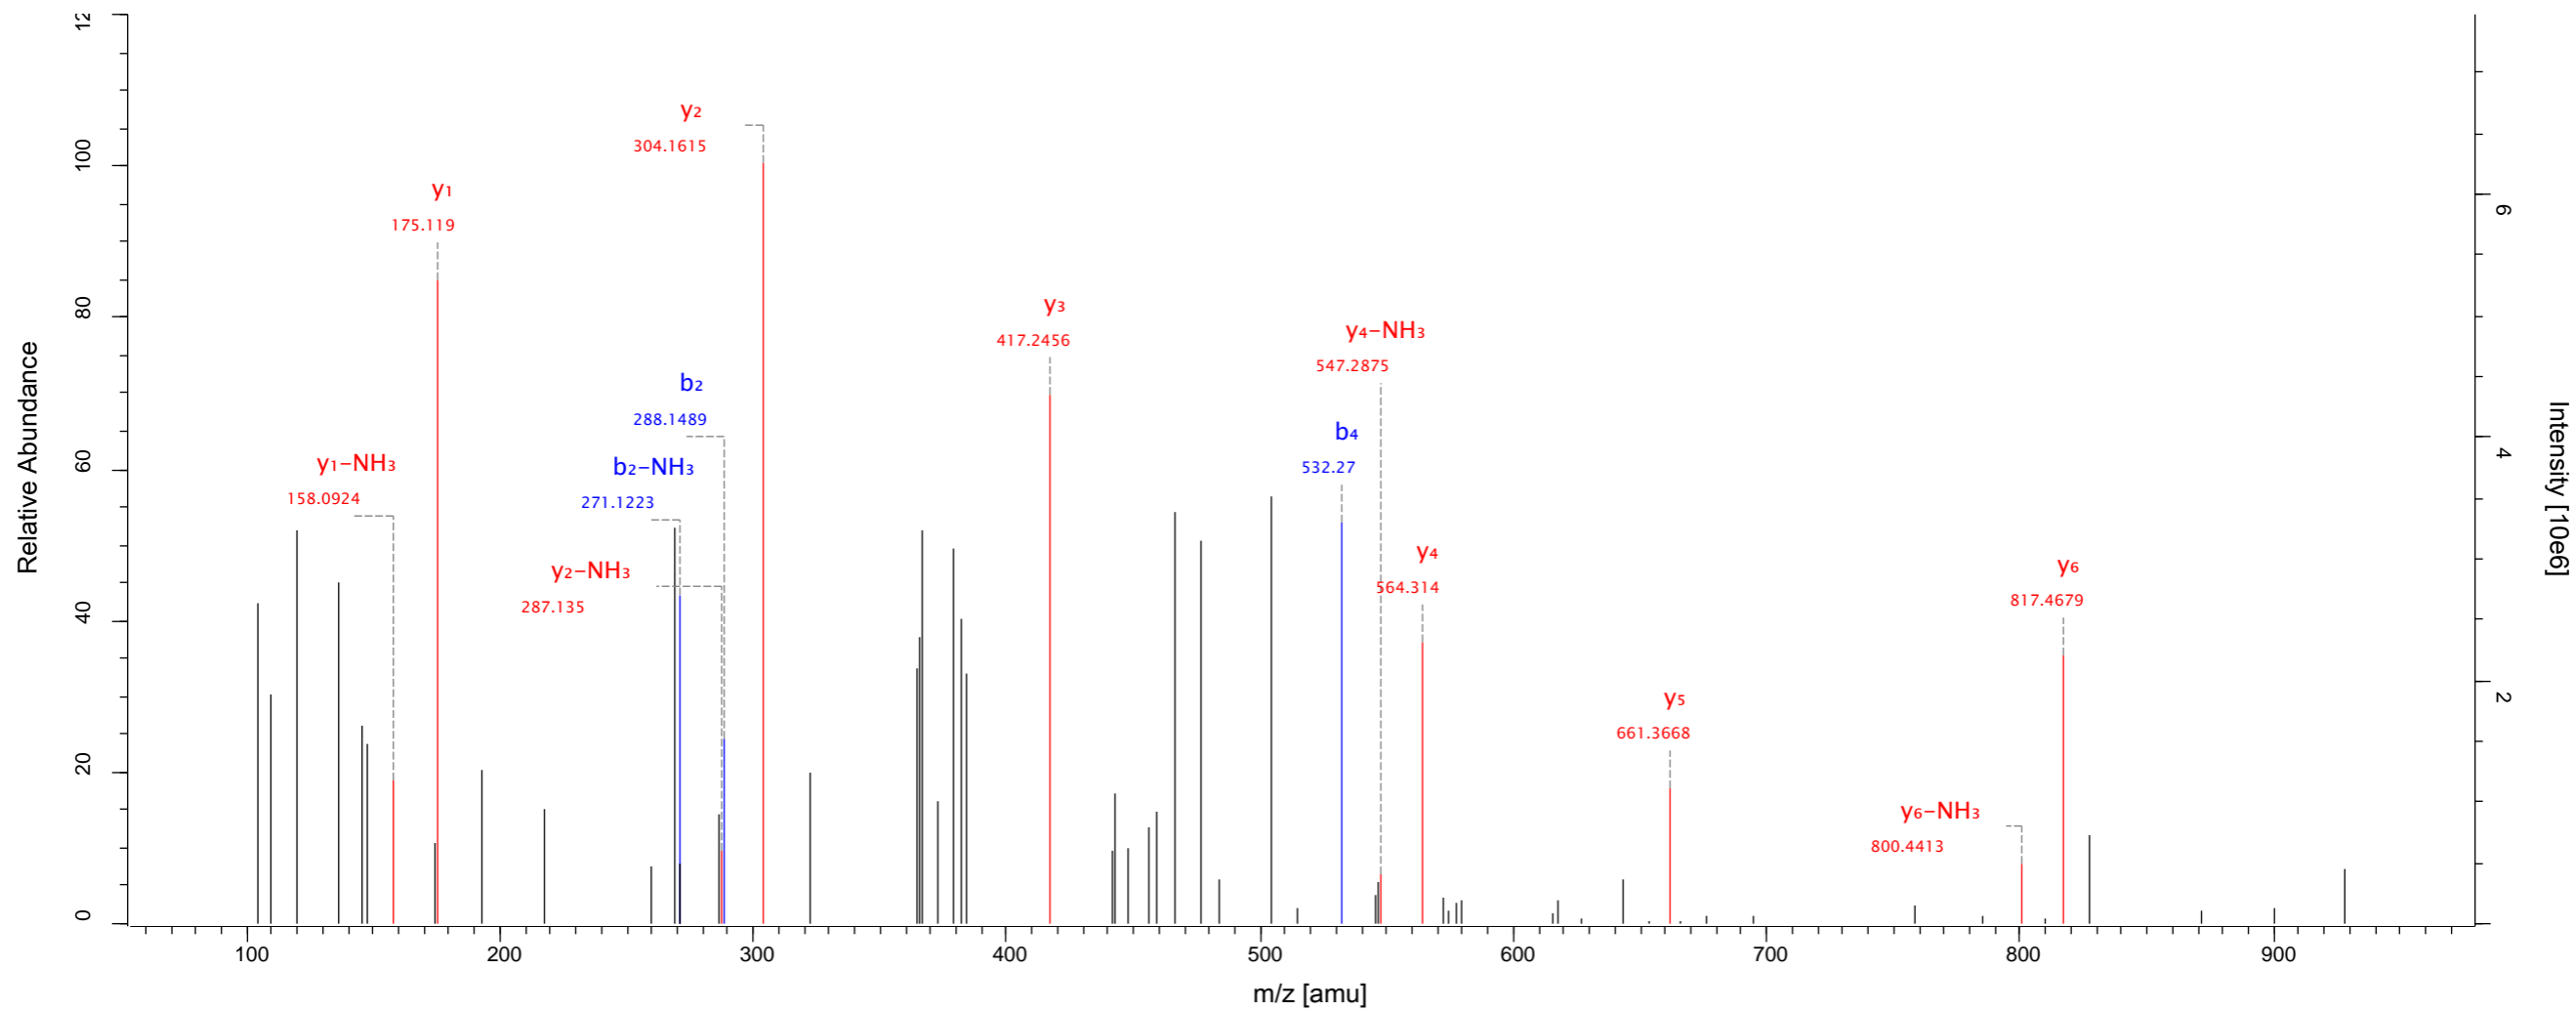

Raw file: 20111212\_EXQ5\_AnMi\_QC\_HCMVp11\_11  
Scan number: 18063  
Protein: ORFL149C.iORF2 - NC\_006273.2[91004,91471]- <unknown description>  
Peptide score: 126.67  
Method: FTMS; HCD

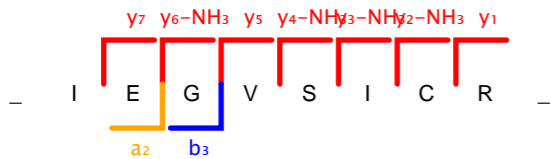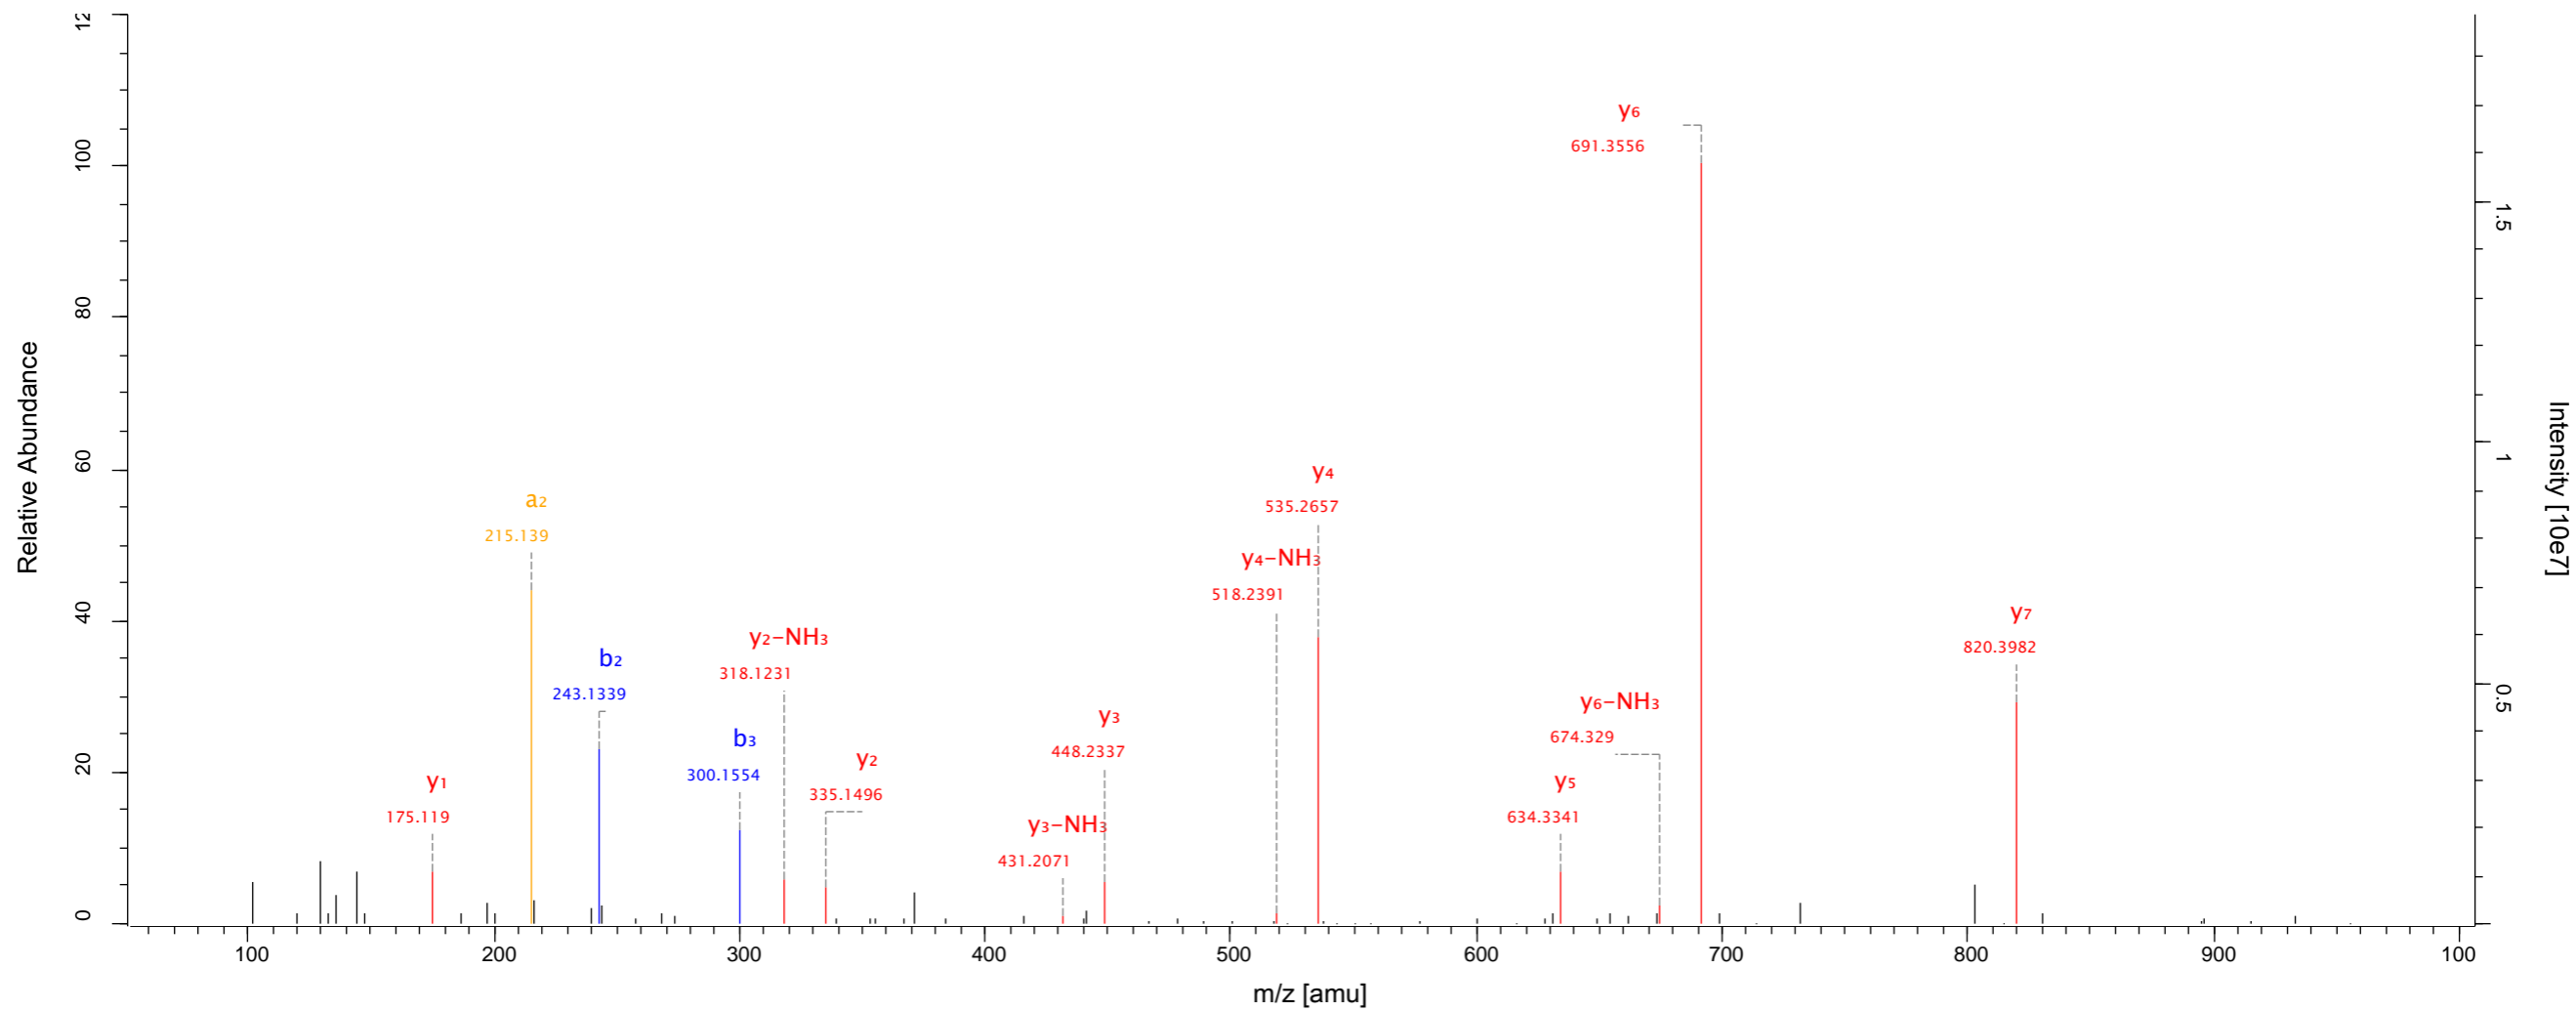

Raw file: 20111212\_EXQ5\_AnMi\_QC\_HCMVp1\_11  
Scan number: 20789  
Protein: ORFL119C - NC\_006273.2[63363,63800]- <unknown description>  
Peptide score: 136.99  
Method: FTMS; HCD

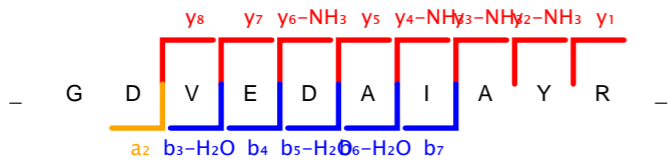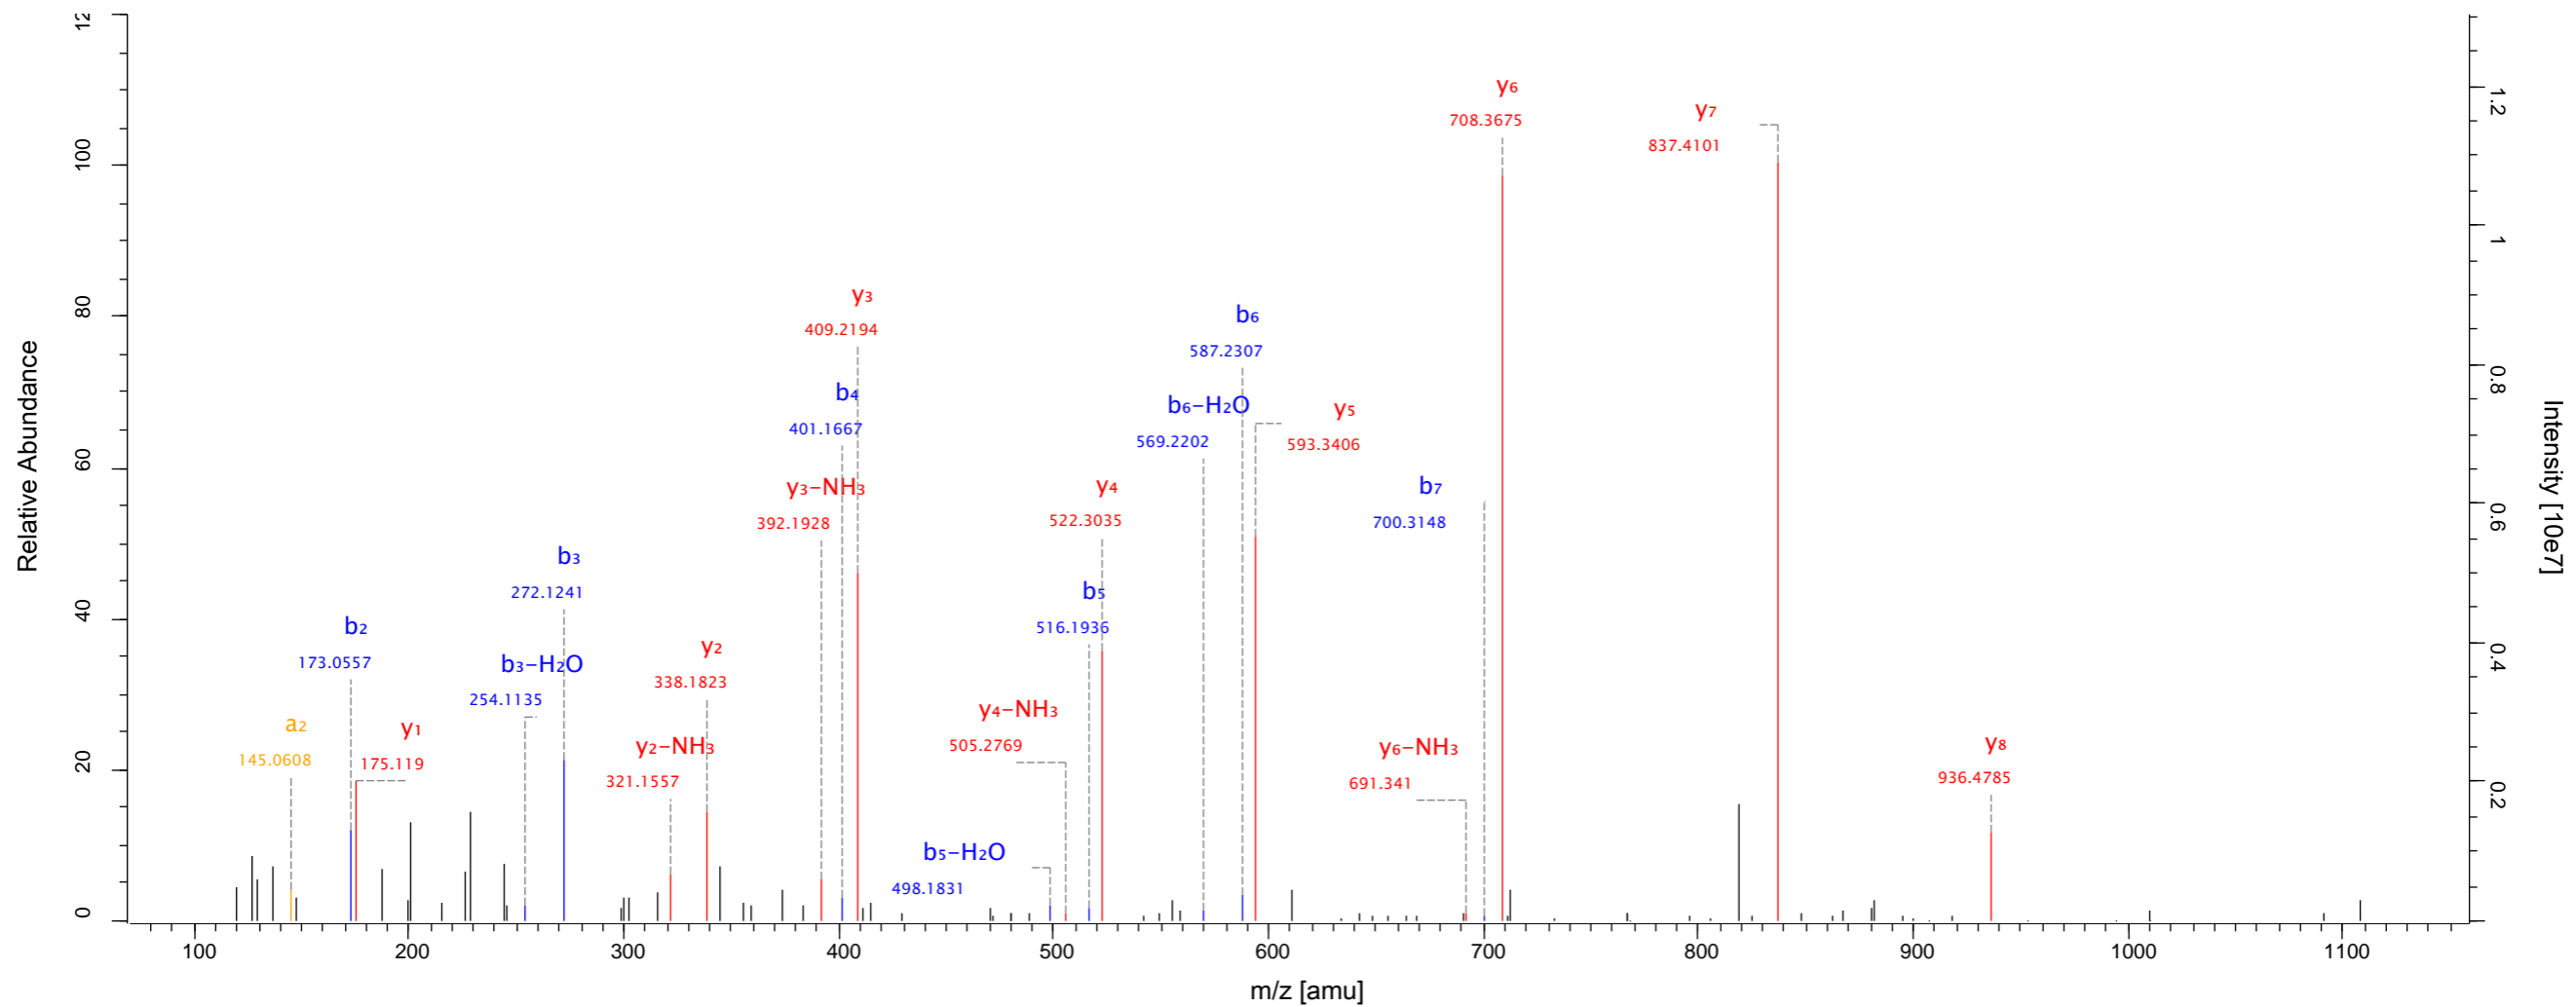



Raw file: 20111212\_EXQ5\_AnMi\_QC\_HCMVp1\_11  
 Scan number: 22830  
 Protein: ORFL294W.iORF1 + NC\_006273.2[183230,193441]+ <unknown description>; ORFL294W + NC\_006273.2[183230,193441]+ <unknown description>  
 Peptide score: 295.43  
 Method: FTMS; HCD

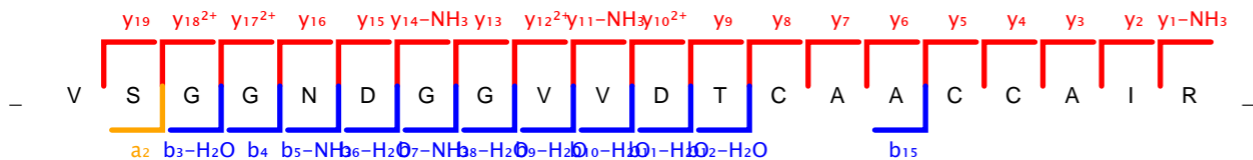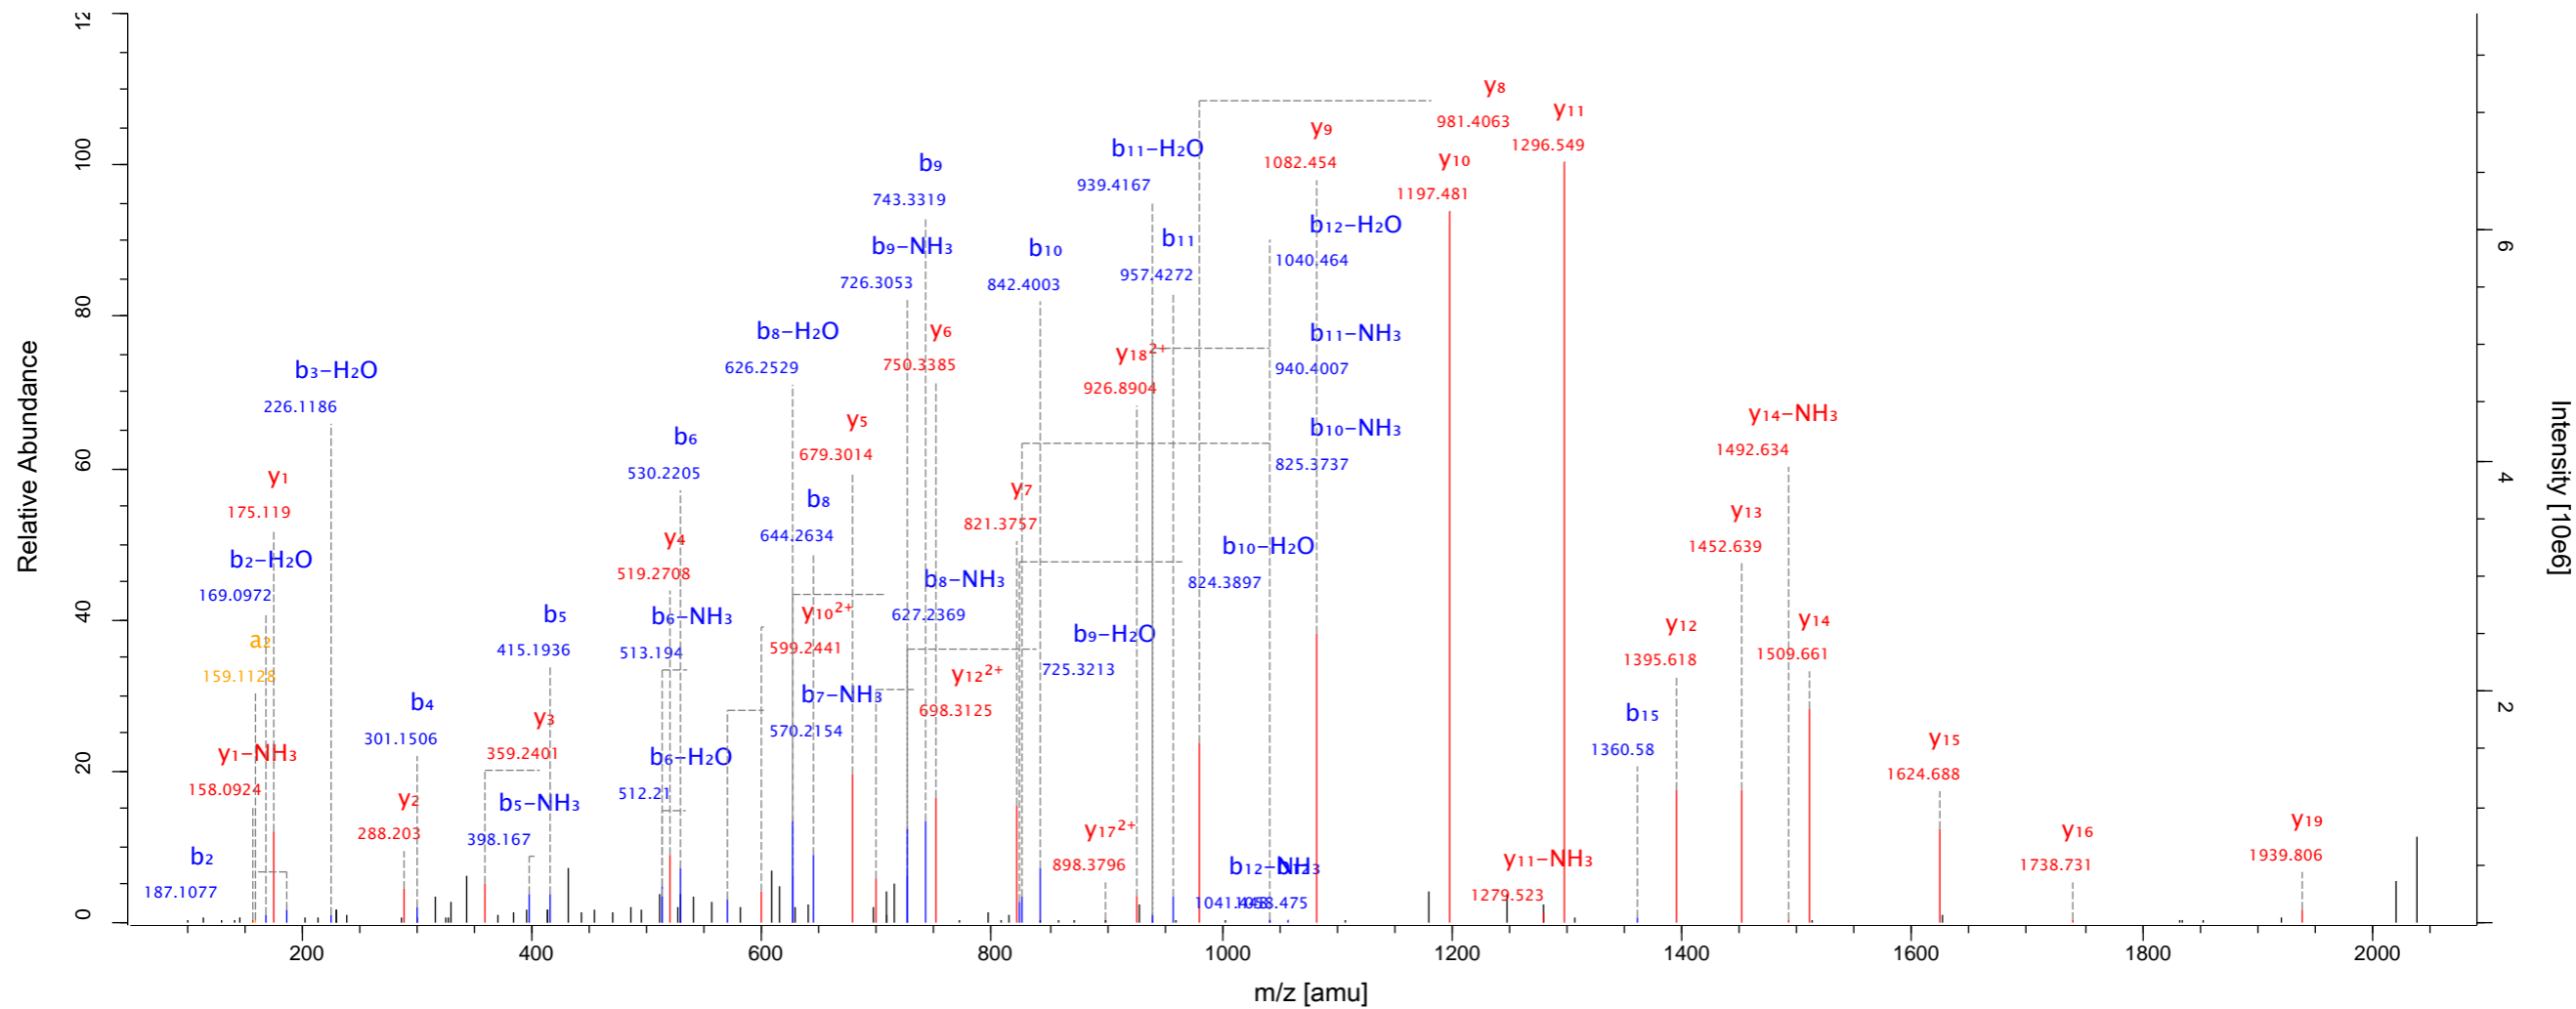

Raw file: 20111212\_EXQ5\_AnMi\_QC\_HCMVp1\_11  
Scan number: 25209  
Protein: ORFL224C.iORF1 - NC\_006273.2[134354,134734]- <unknown description>  
Peptide score: 122.19  
Method: FTMS; HCD

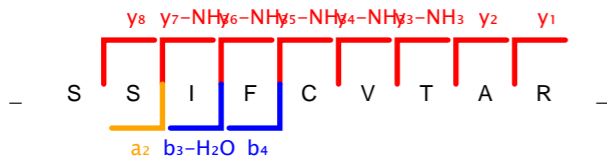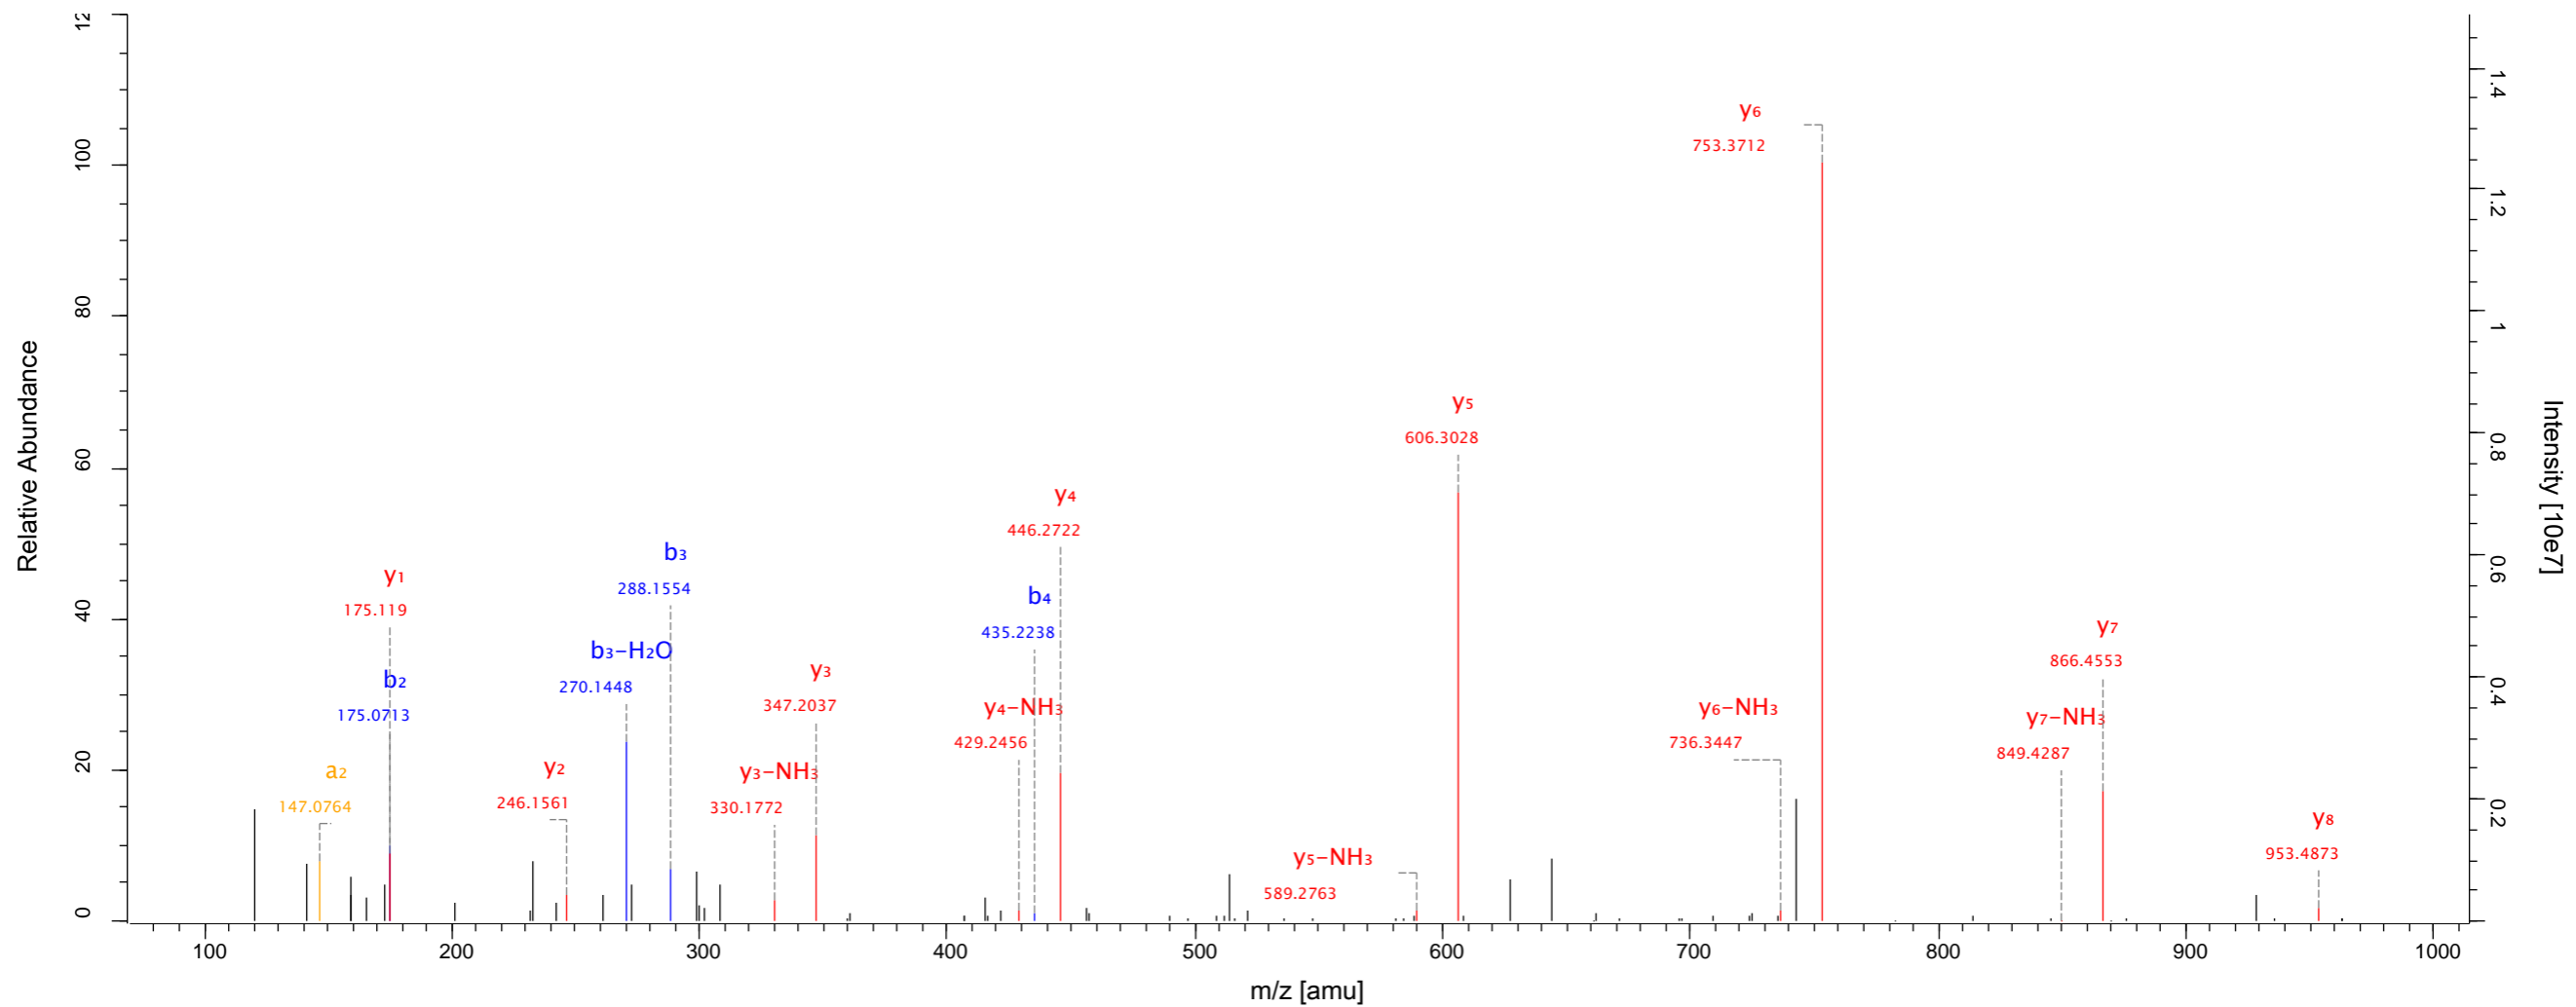

Raw file: 20111212\_EXQ5\_AnMi\_QC\_HCMVp1\_11  
 Scan number: 25365  
 Protein: ORFL86W + NC\_006273.2[38059,38538]+ <unknown description>  
 Peptide score: 162.49  
 Method: FTMS; HCD

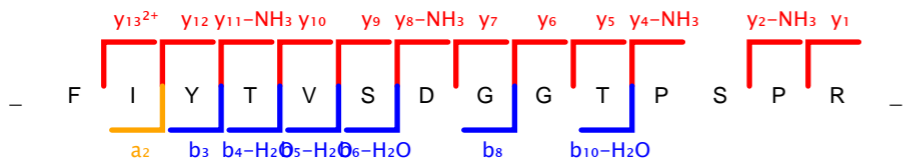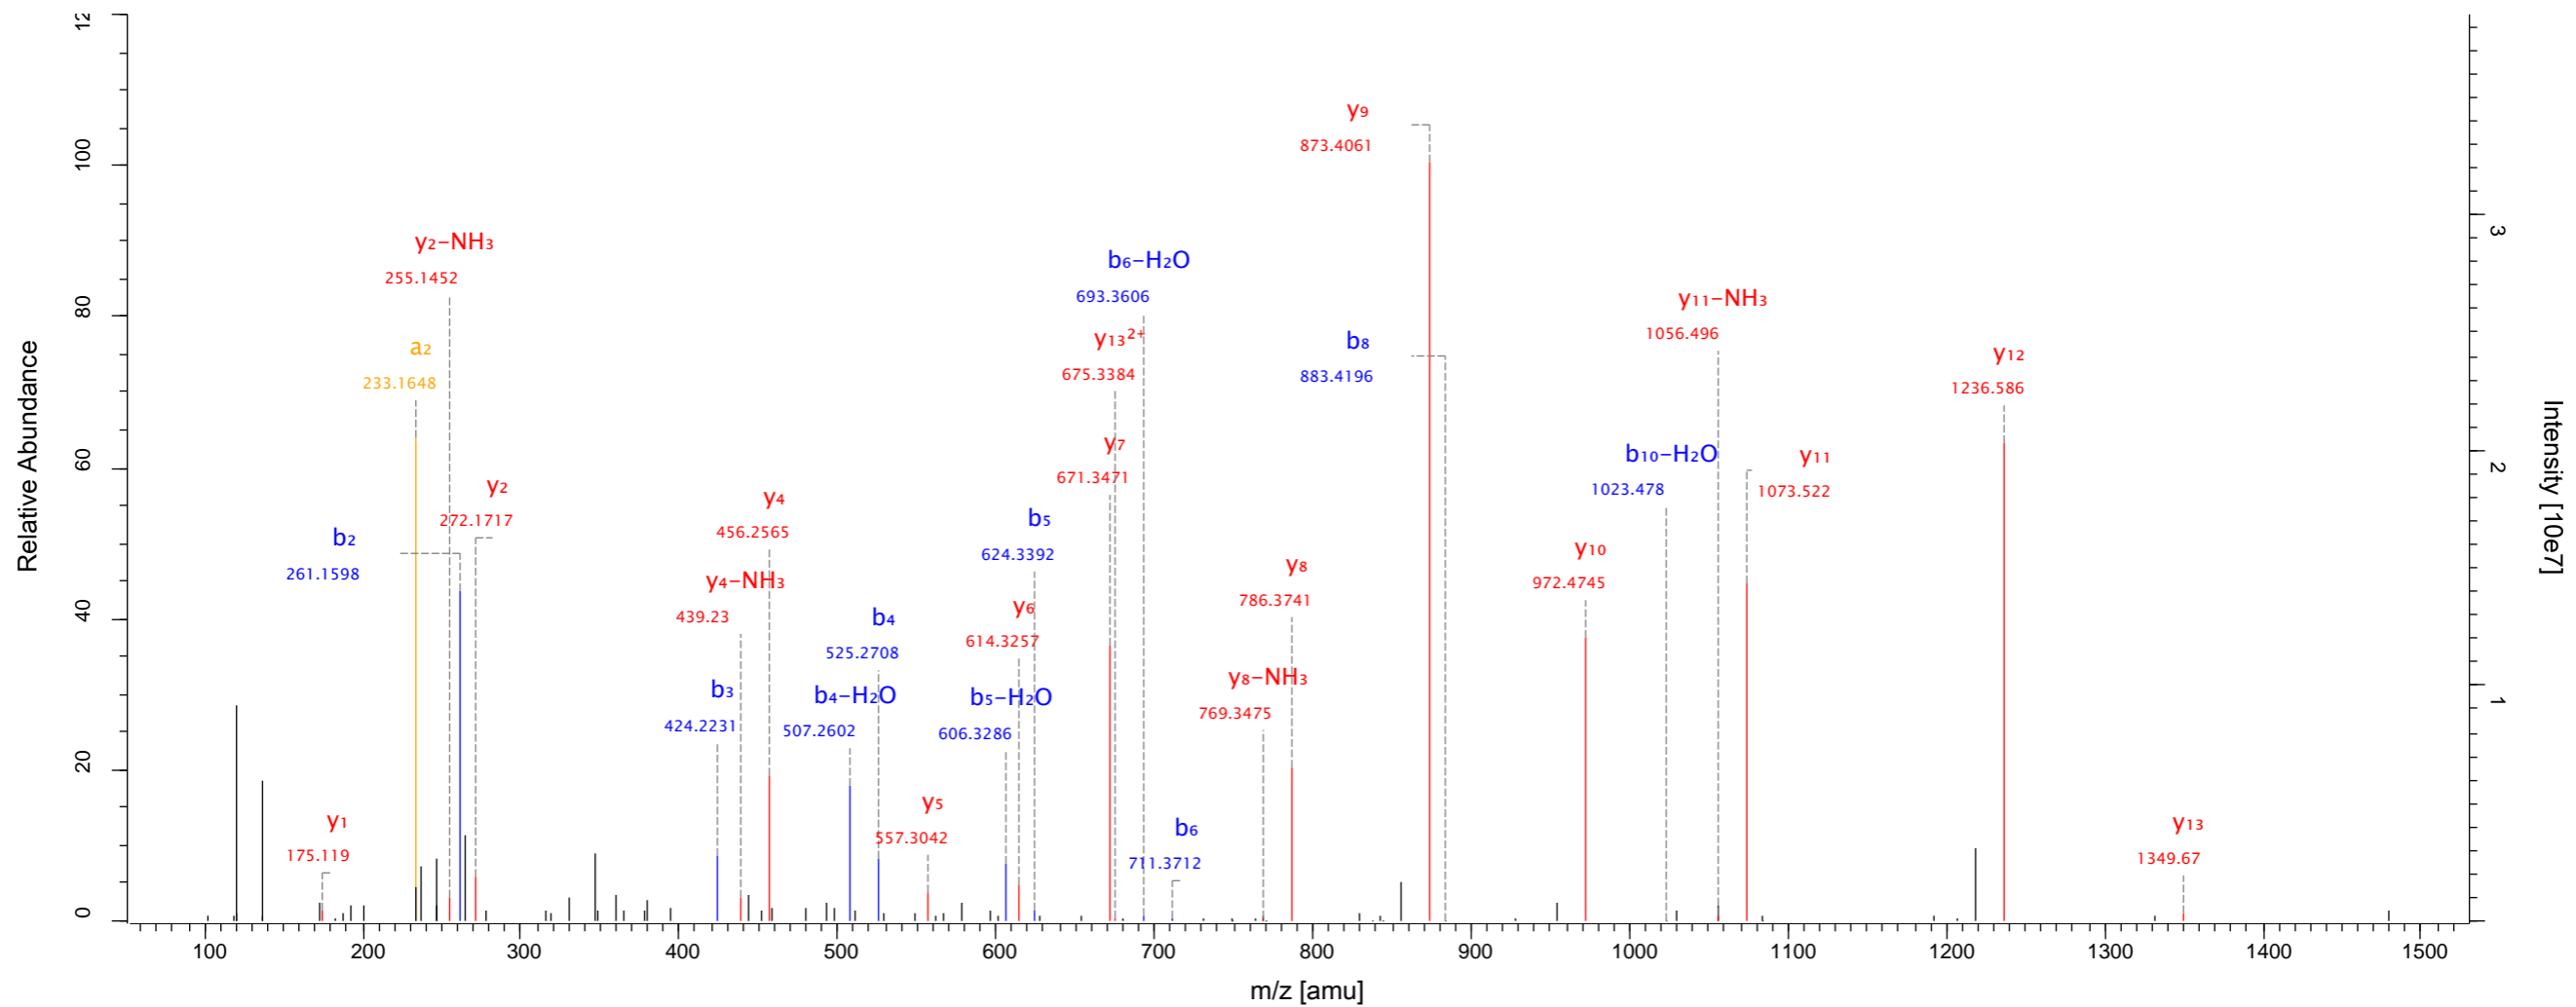

Raw file: 20111212\_EXQ5\_AnMi\_QC\_HCMVp1\_11  
 Scan number: 27975  
 Protein: ORFL224C.iORF1 - NC\_006273.2[134354,134734]- <unknown description>  
 Peptide score: 134.99  
 Method: FTMS; HCD

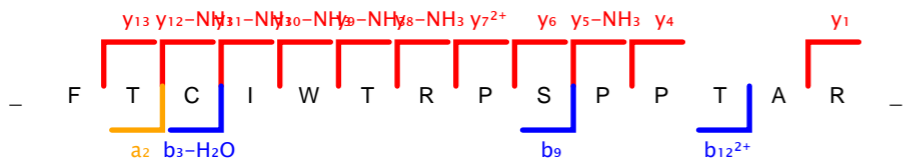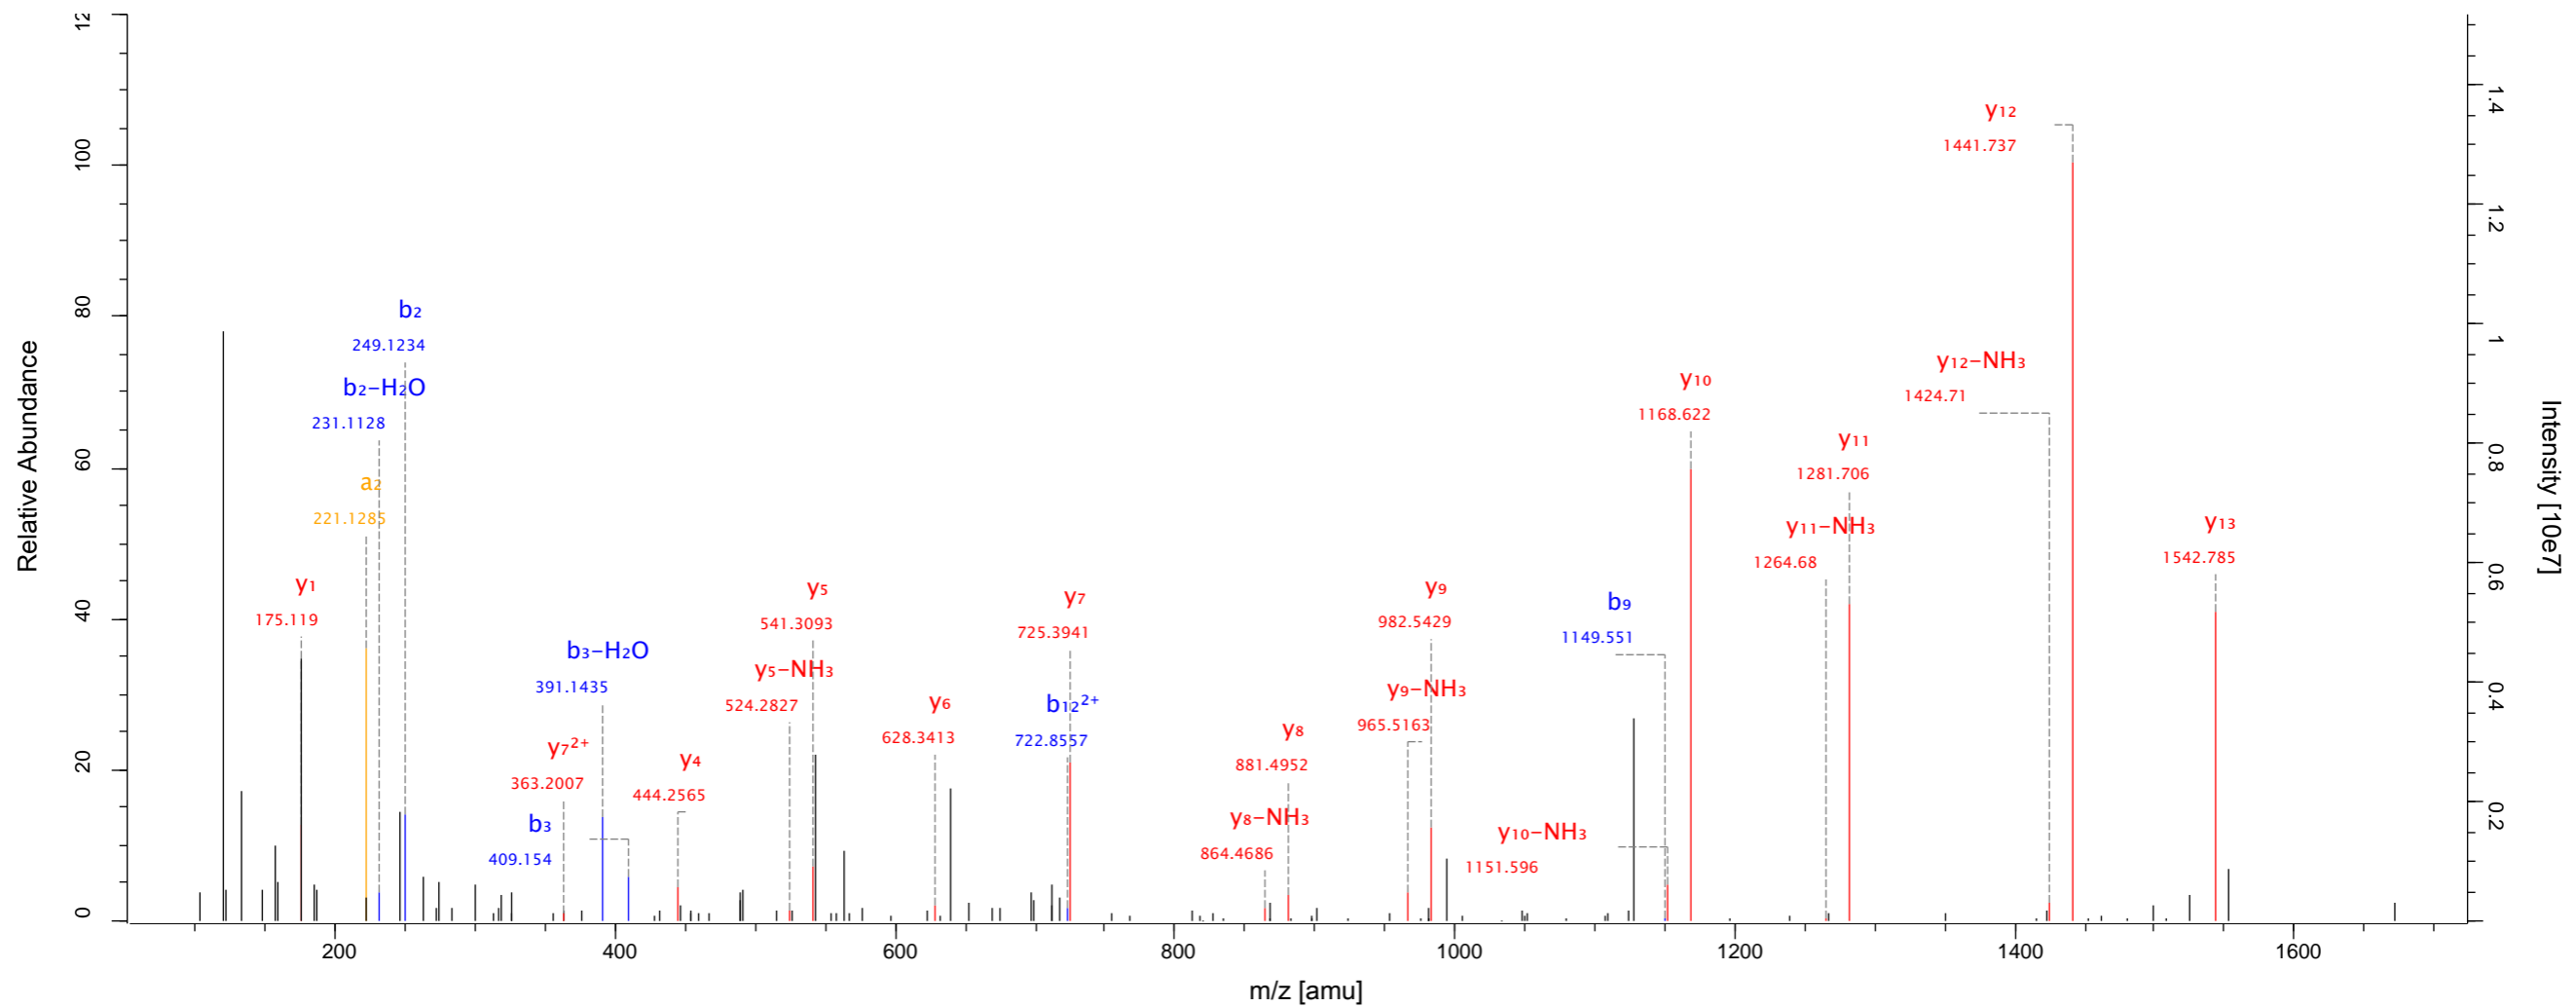

Raw file: 20111212\_EXQ5\_AnMi\_QC\_HCMVp1\_11  
 Scan number: 29833  
 Protein: ORFL130W + NC\_006273.2[72313,72744]+ <unknown description>  
 Peptide score: 266.28  
 Method: FTMS; HCD

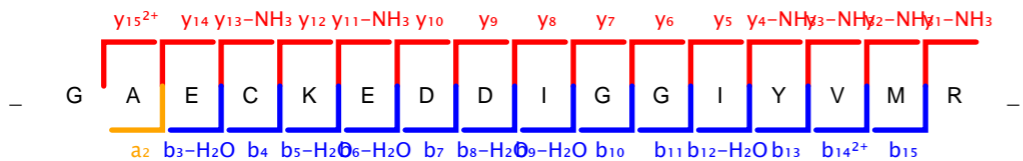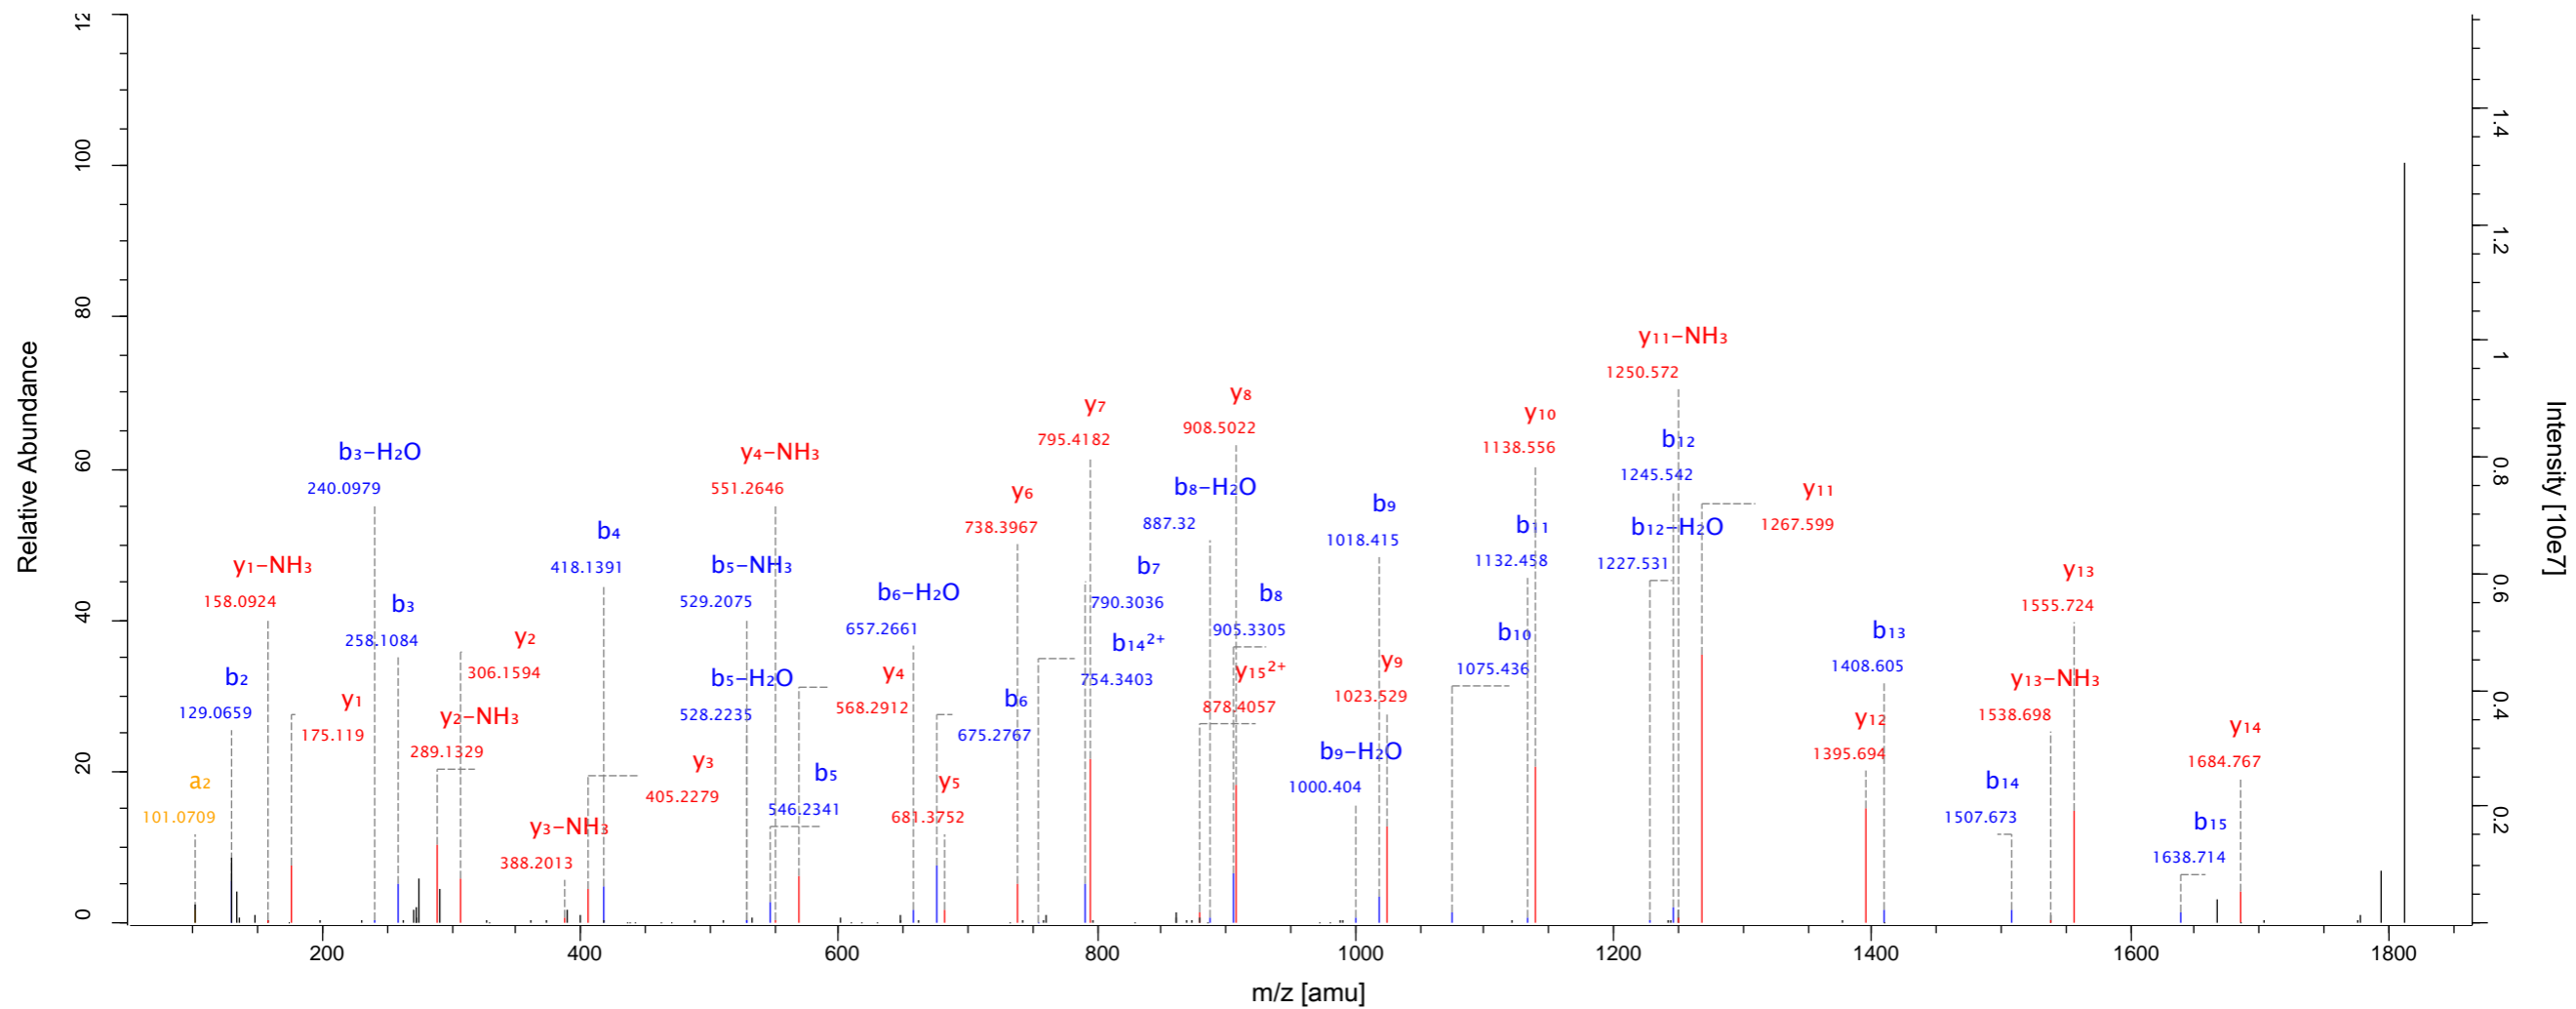

Raw file: 20111212\_EXQ5\_AnMi\_QC\_HCMVp1\_11  
 Scan number: 30525  
 Protein: ORFL130W + NC\_006273.2[72313,72744]+ <unknown description>  
 Peptide score: 206.73  
 Method: FTMS; HCD

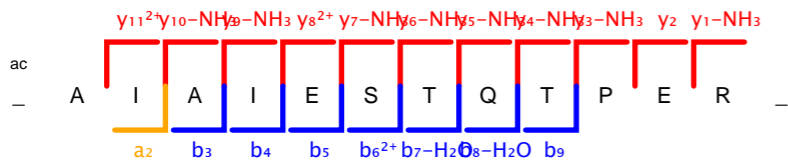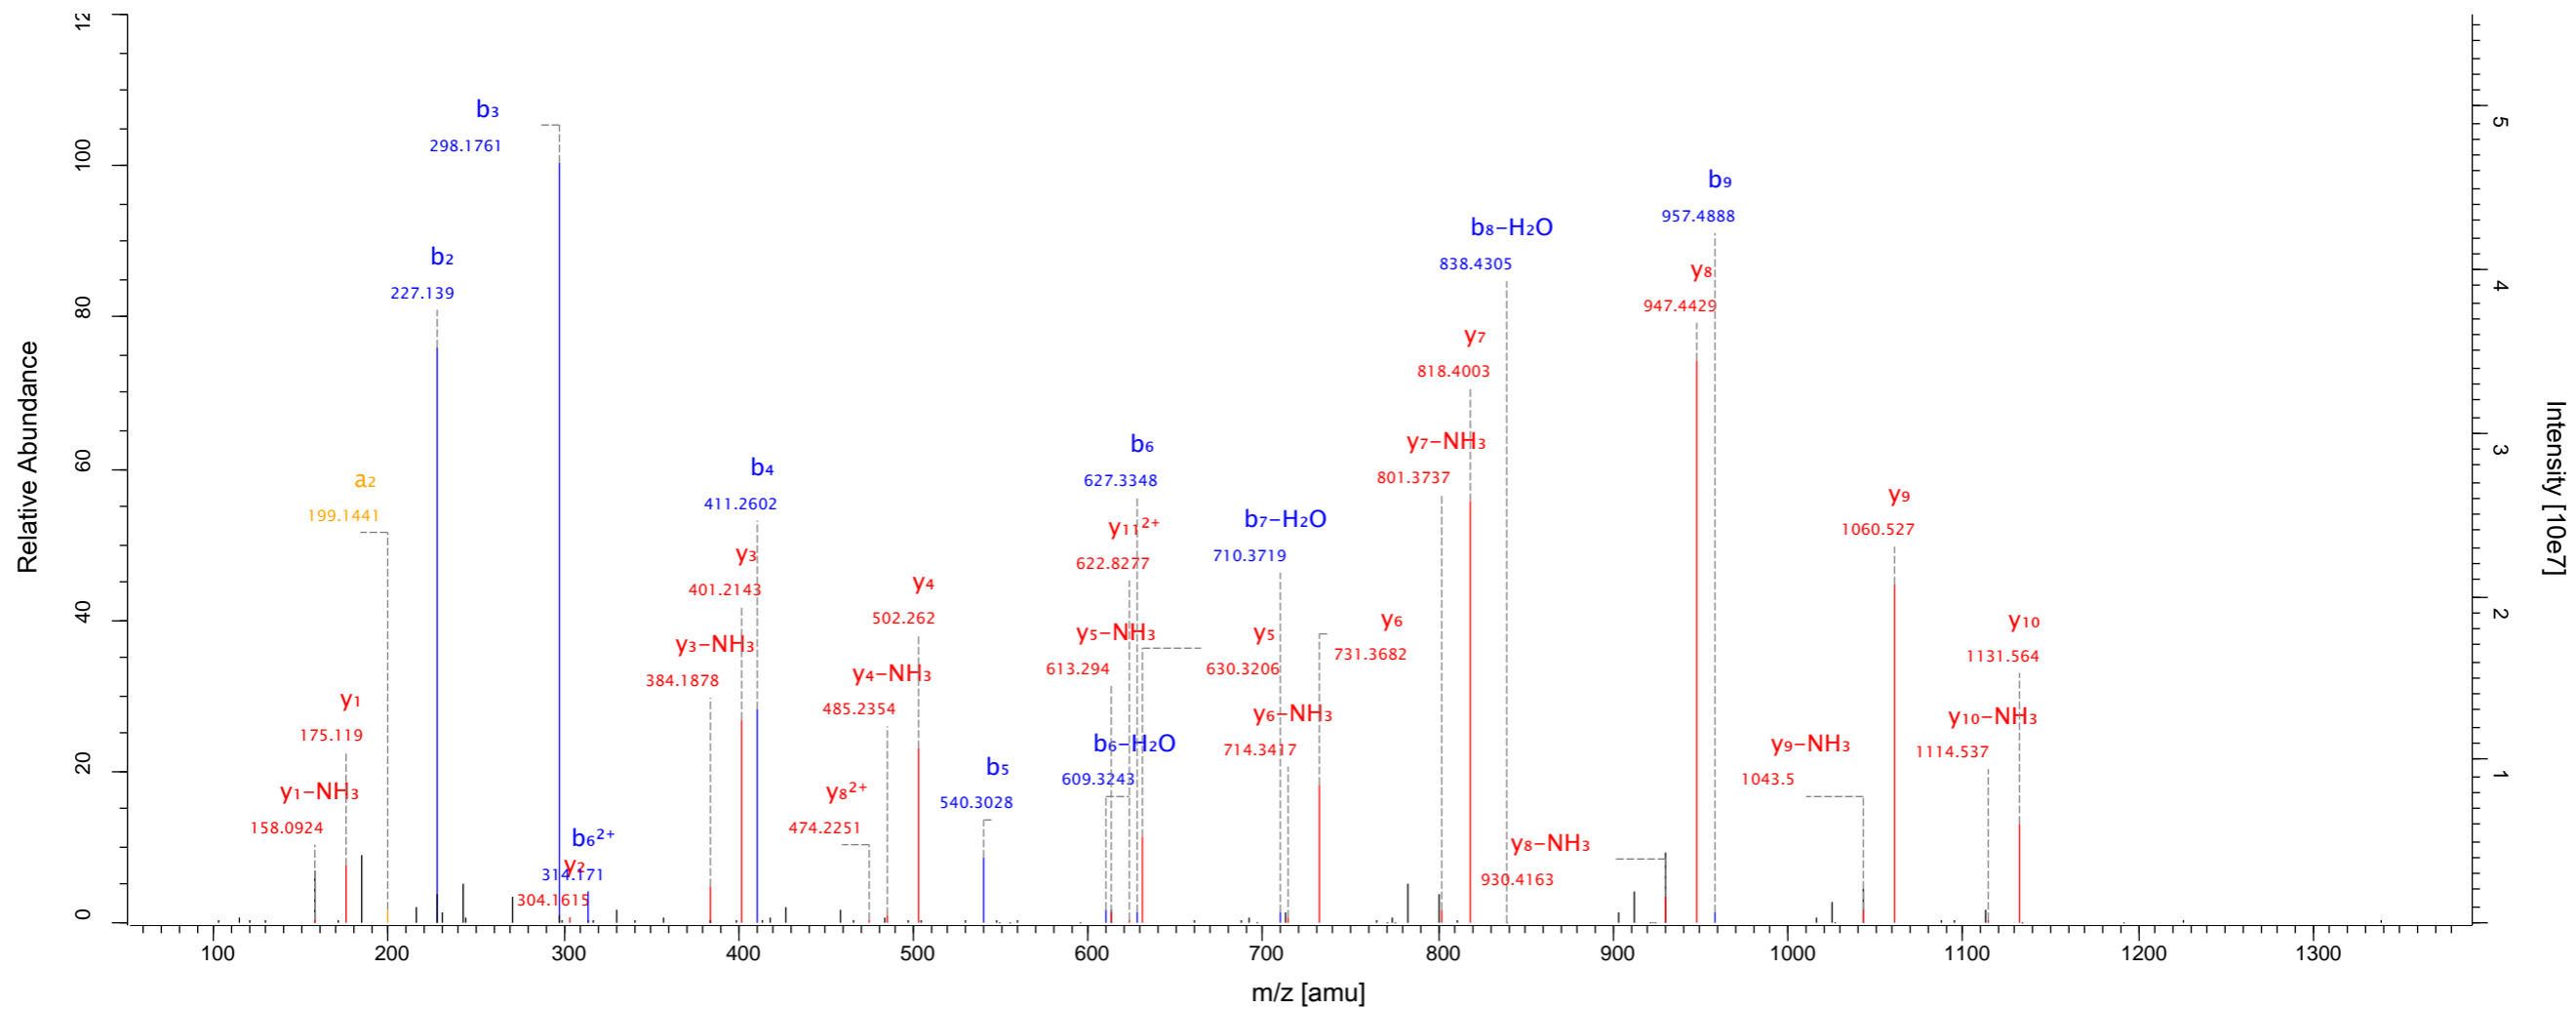

Raw file: 20111212\_EXQ5\_AnMi\_QC\_HCMVp1\_11  
Scan number: 33549  
Protein: ORFL86W + NC\_006273.2[38059,38538]+ <unknown description>  
Peptide score: 103.21  
Method: FTMS; HCD

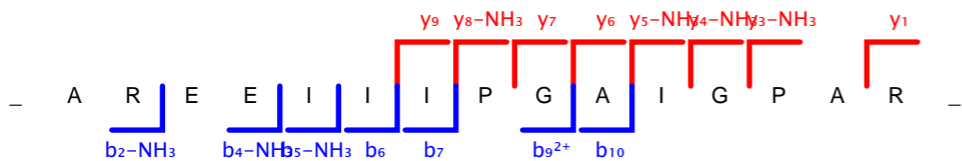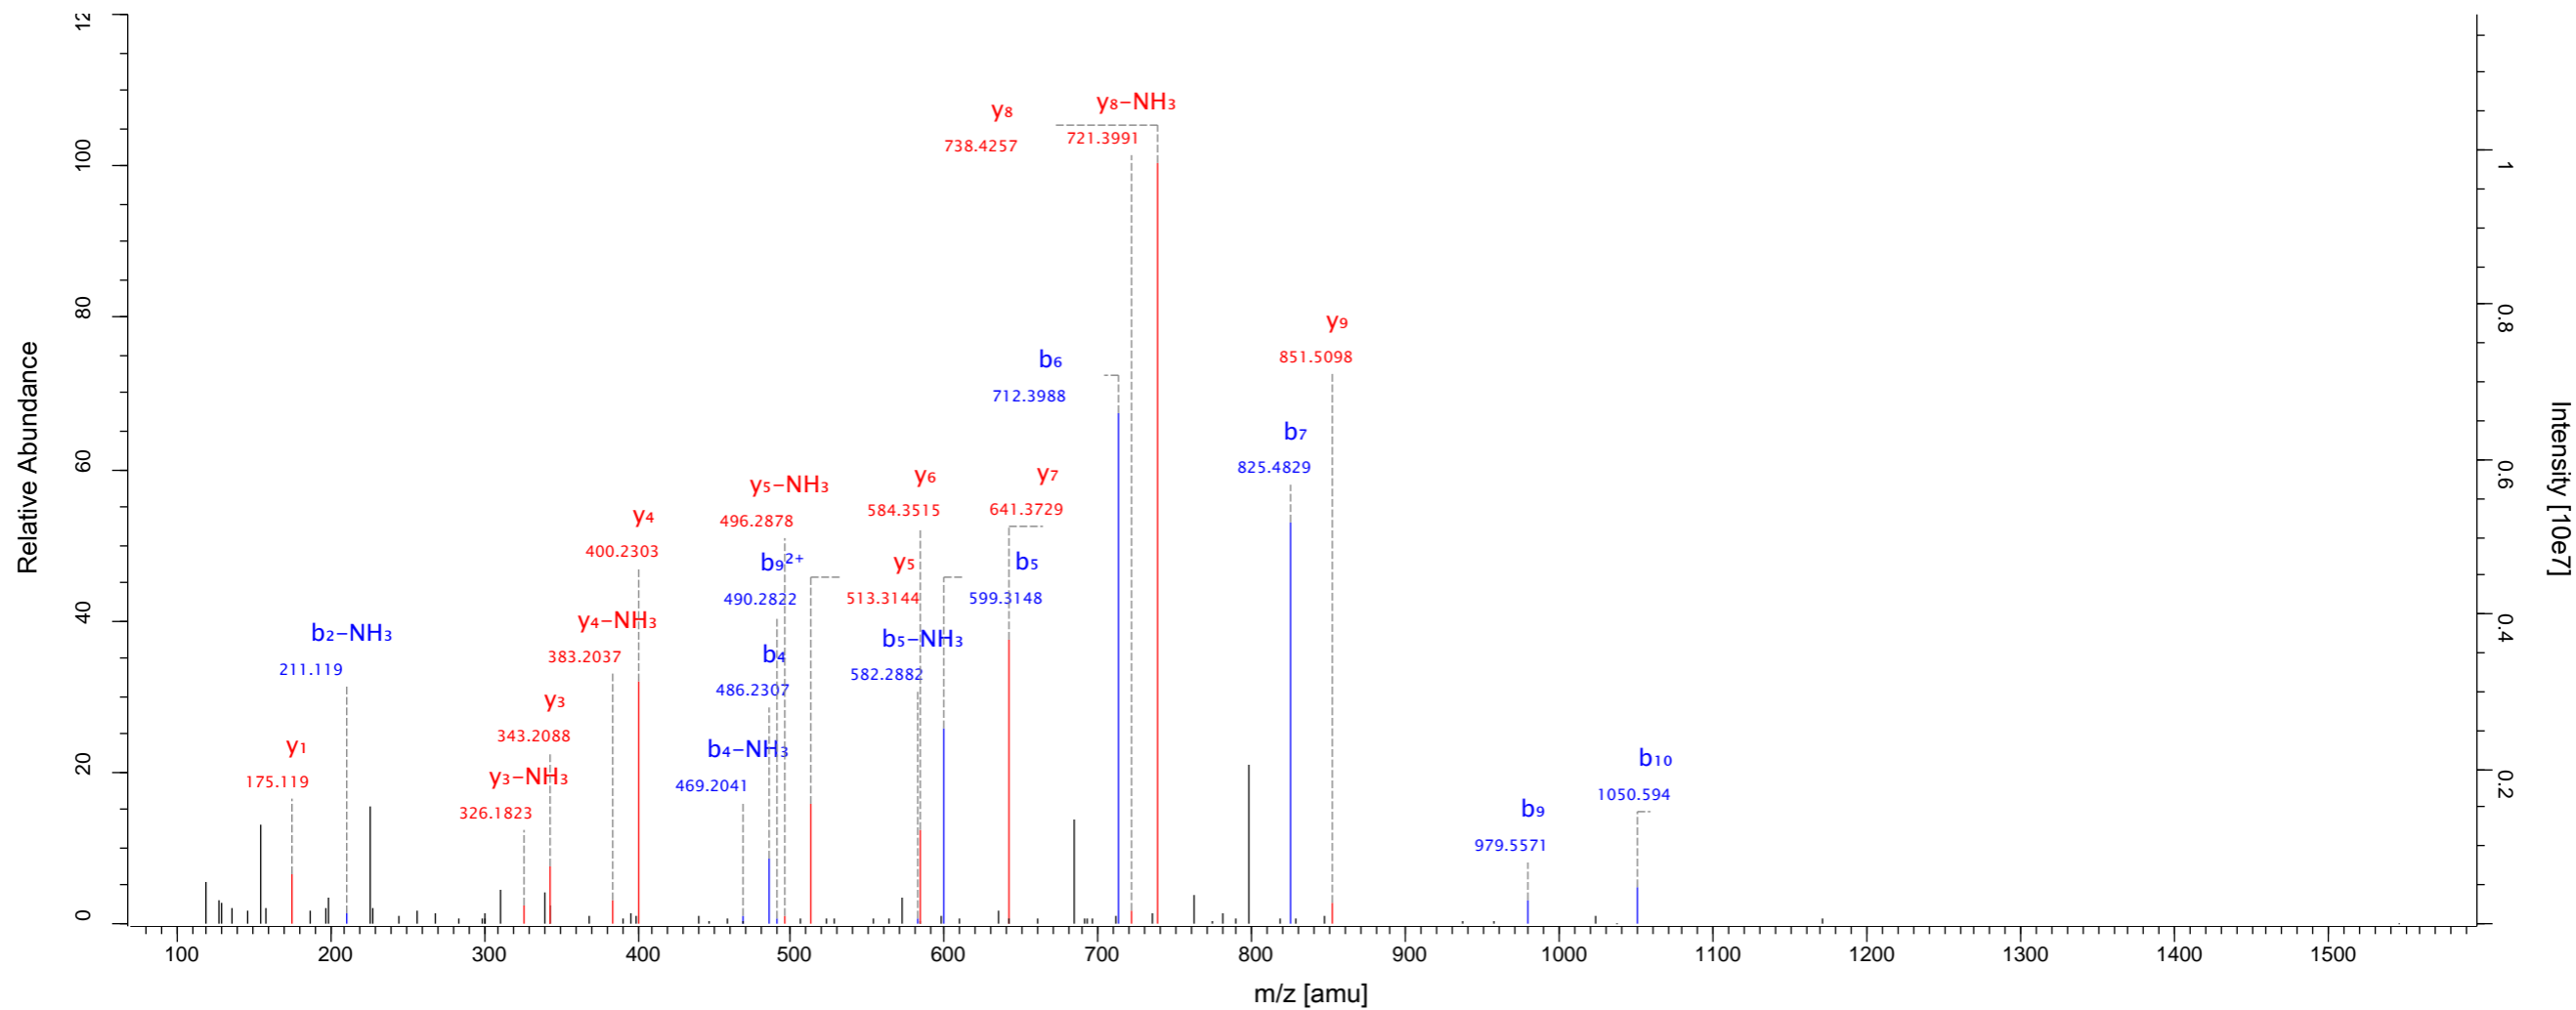

Raw file: 20111212\_EXQ5\_AnMi\_QC\_HCMVp11\_11  
 Scan number: 34783  
 Protein: ORFL86W + NC\_006273.2[38059,38538]+ <unknown description>  
 Peptide score: 235.73  
 Method: FTMS; HCD

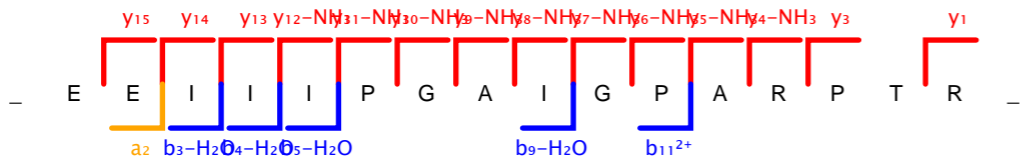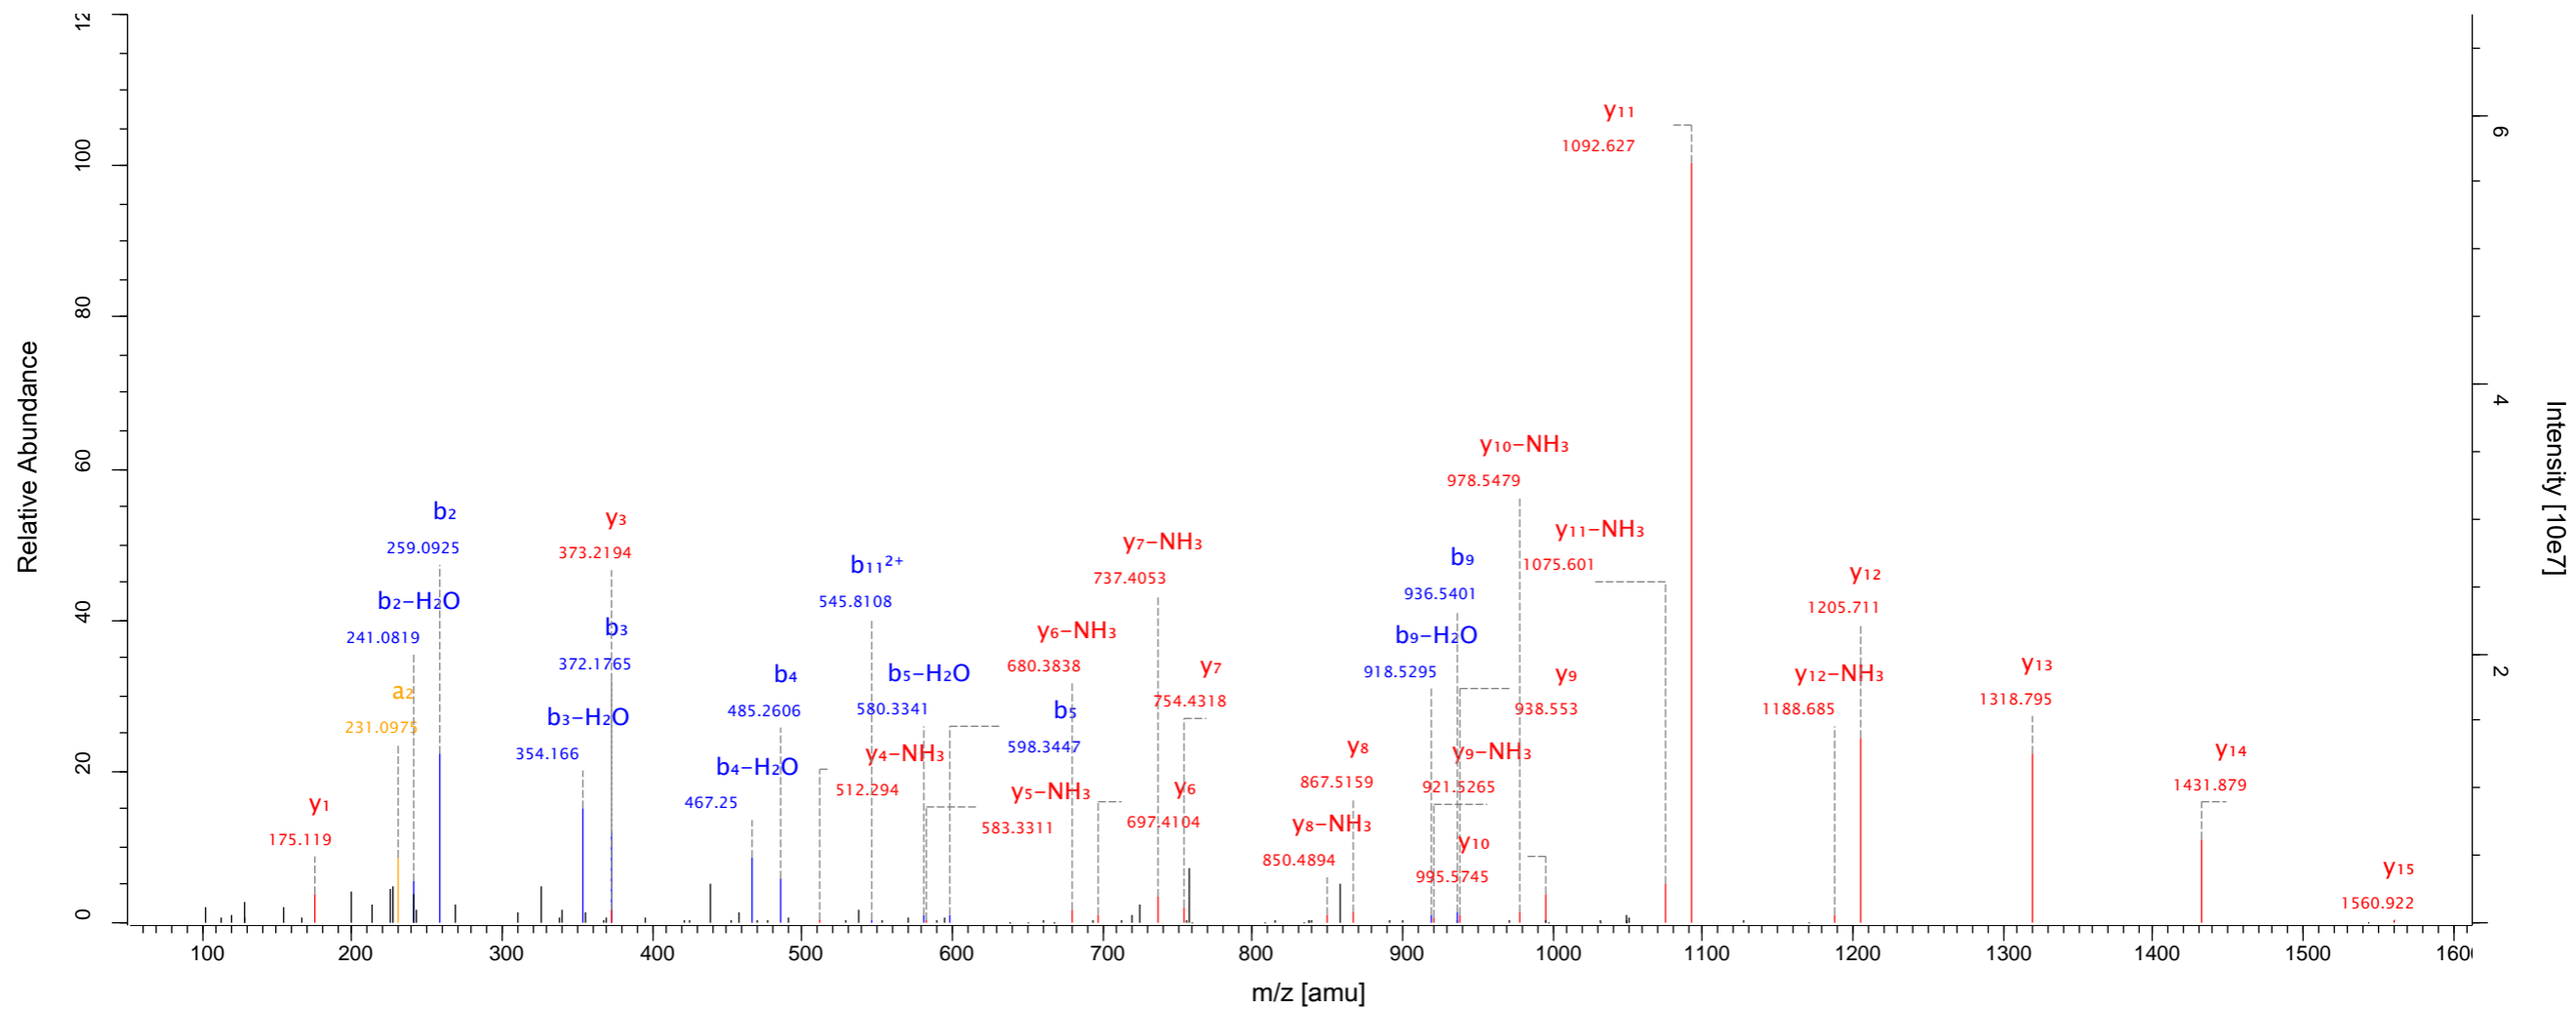



Raw file: 20111212\_EXQ5\_AnMi\_QC\_HCMVp11\_11  
Scan number: 35425  
Protein: ORFL130W + NC\_006273.2[72313,72744]+ <unknown description>  
Peptide score: 143.96  
Method: FTMS; HCD

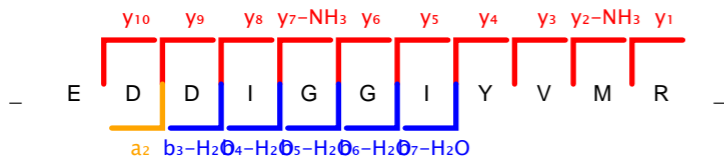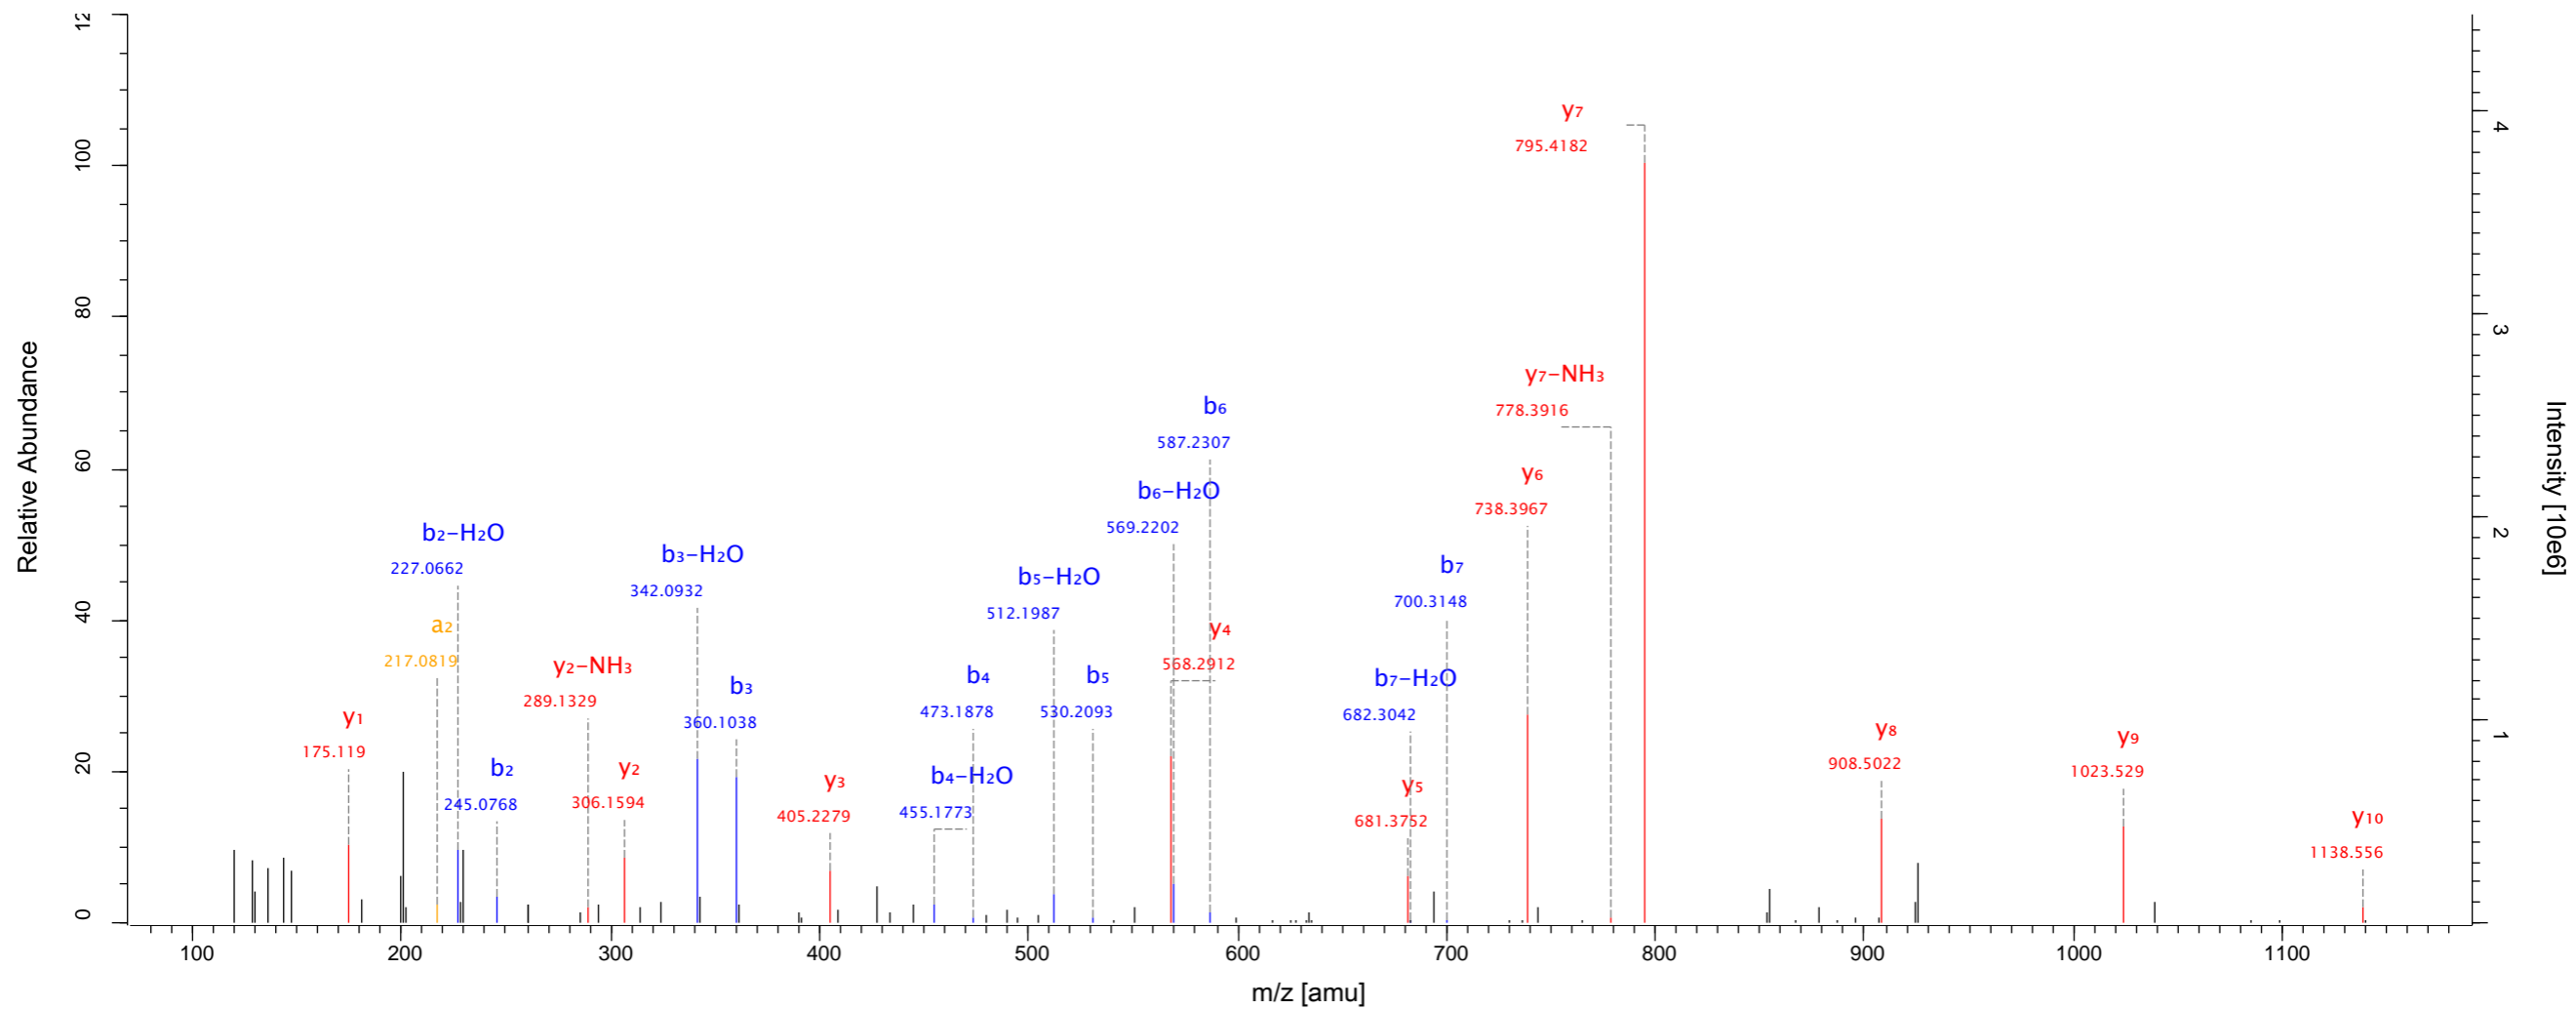

Raw file: 20111212\_EXQ5\_AnMi\_QC\_HCMVp11\_11  
 Scan number: 39148  
 Protein: ORFL119C - NC\_006273.2[63363,63800]- <unknown description>  
 Peptide score: 161.32  
 Method: FTMS; HCD

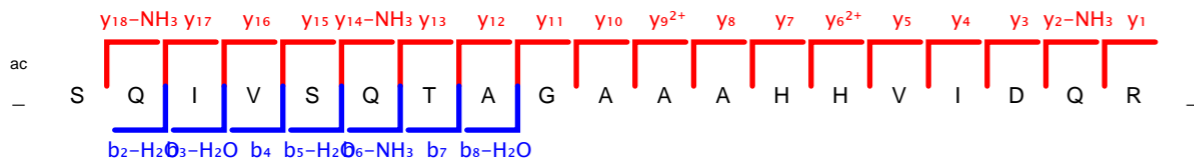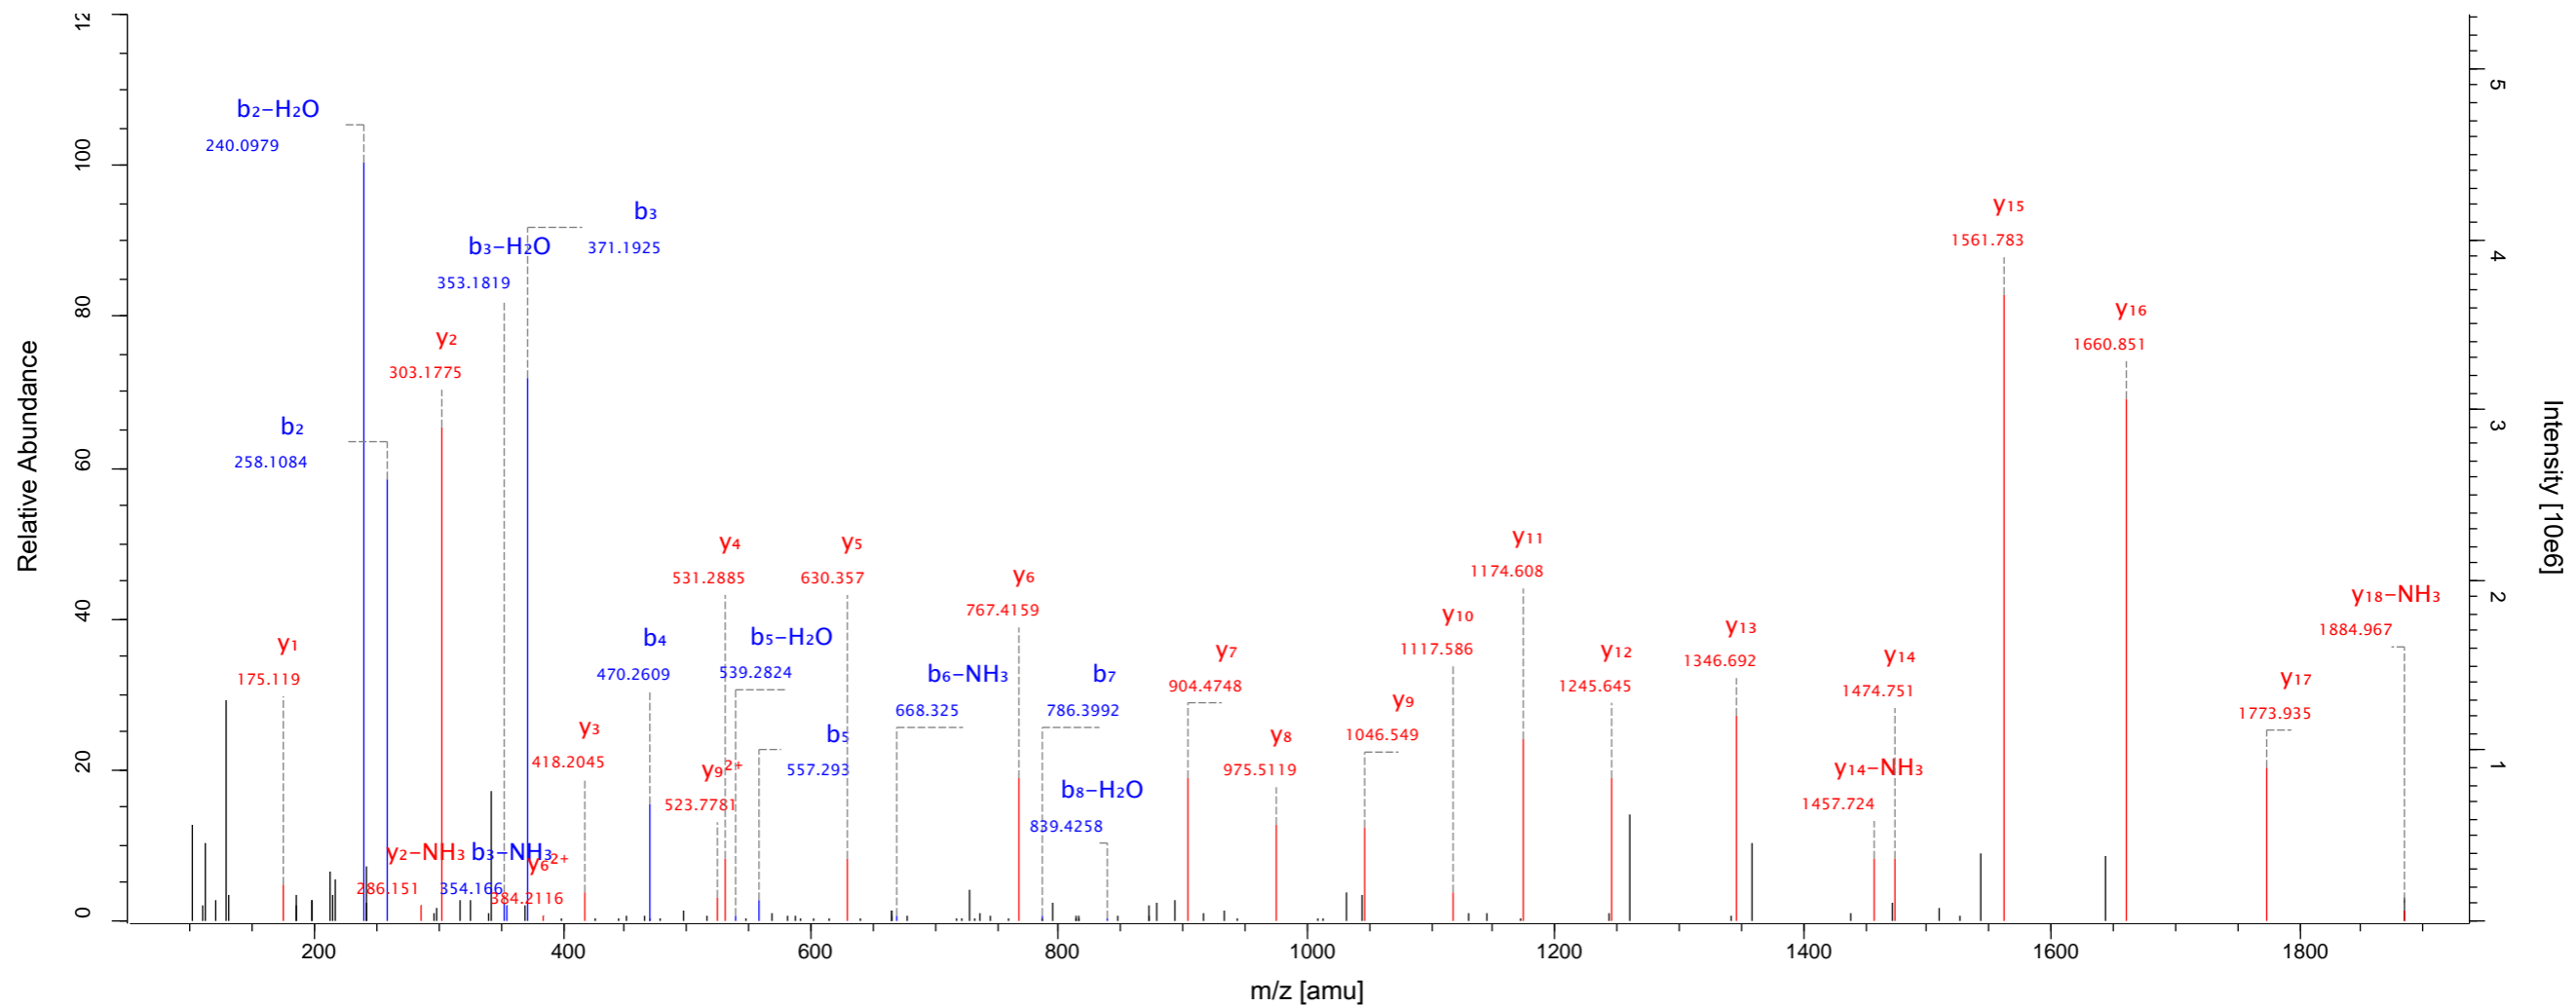

Raw file: 20111212\_EXQ5\_AnMi\_QC\_HCMVp1\_11  
 Scan number: 44065  
 Protein: ORFL118C - NC\_006273.2[61896,62396]- <unknown description>  
 Peptide score: 169.06  
 Method: FTMS; HCD

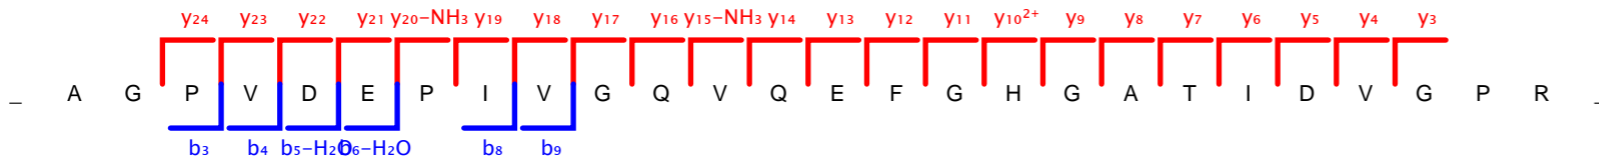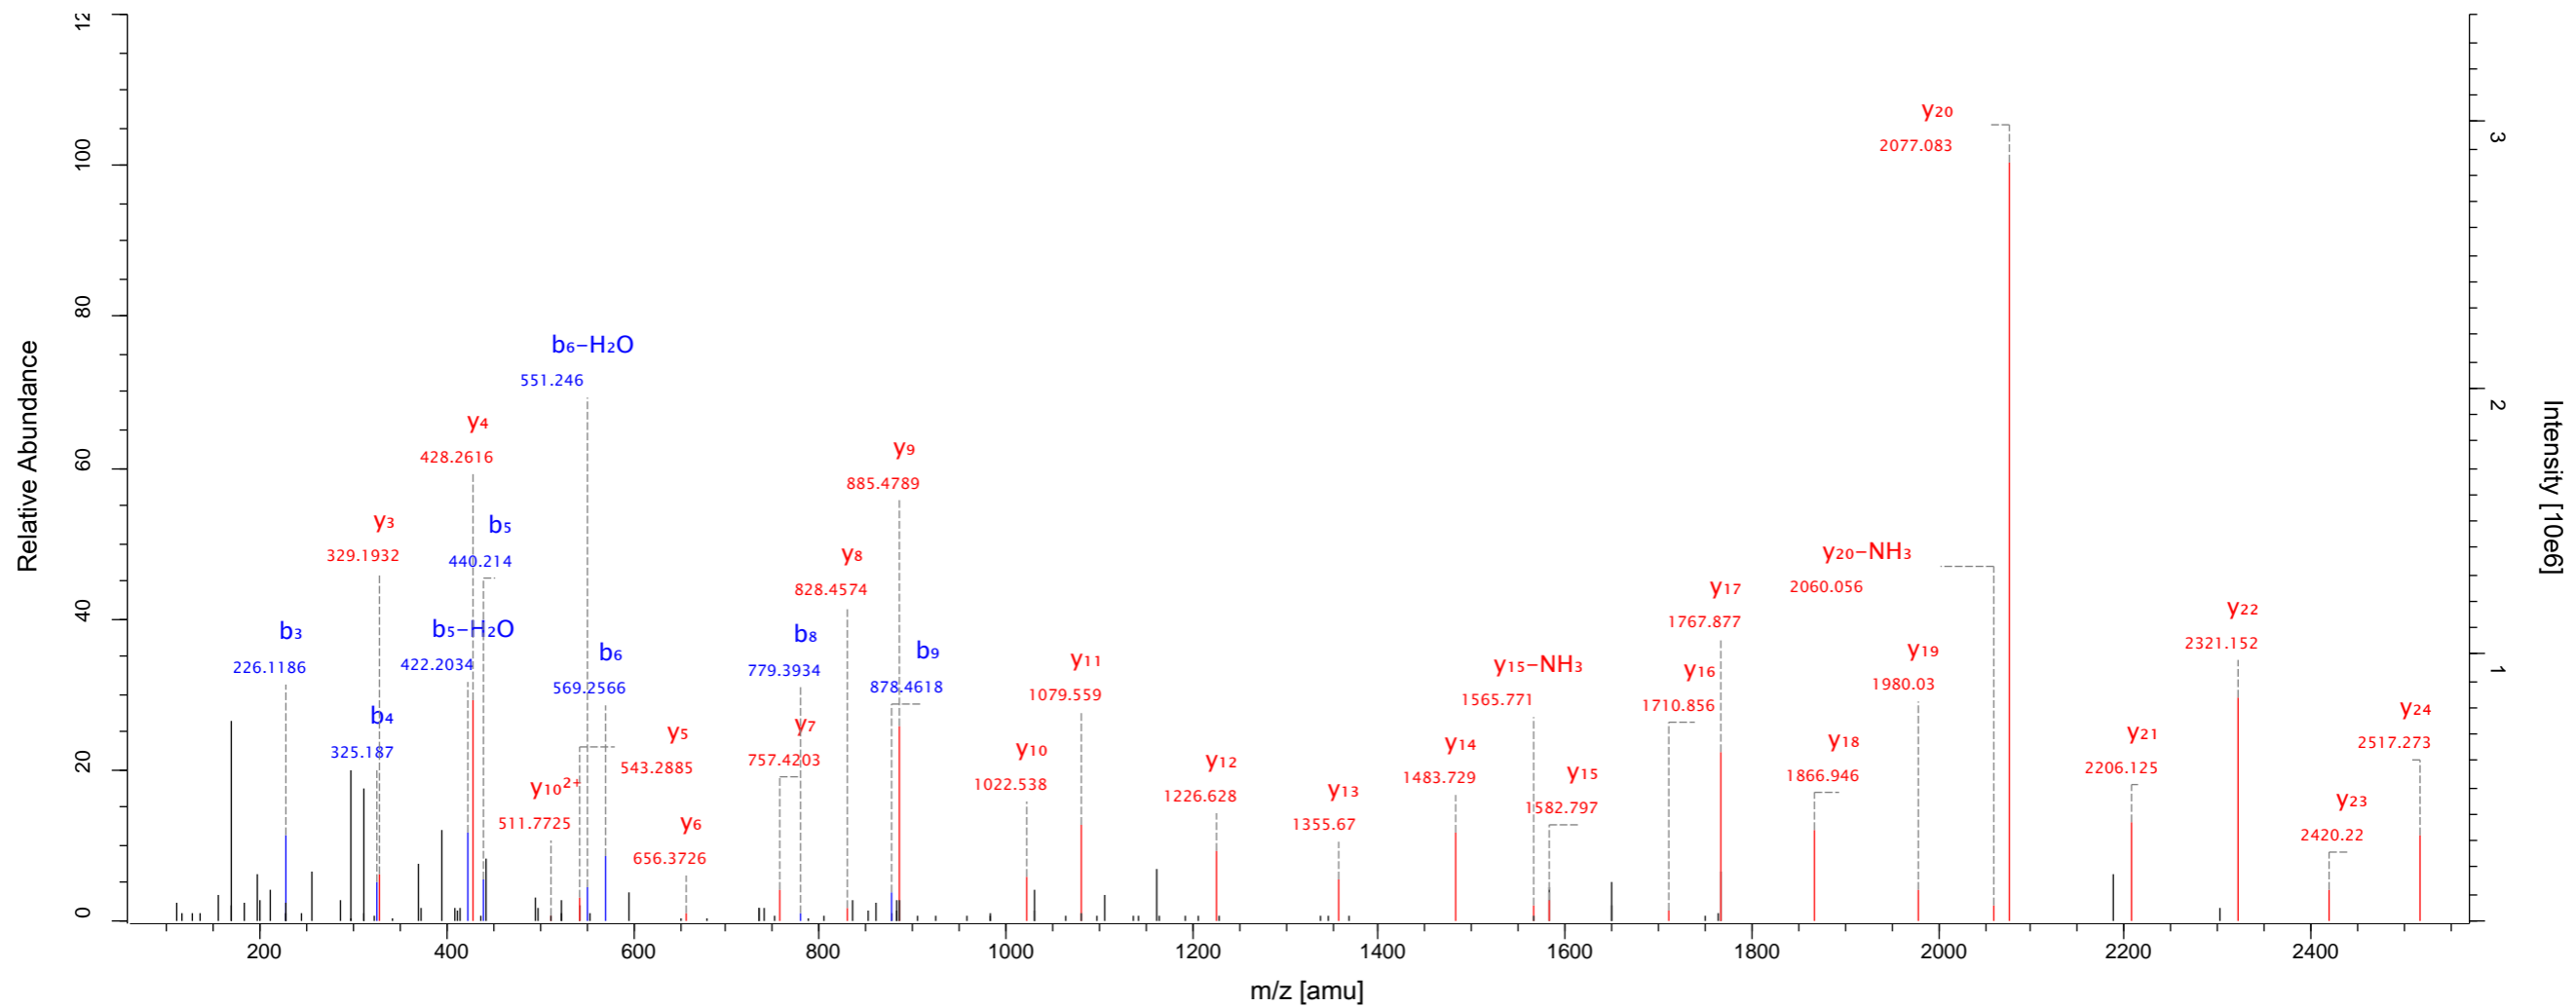

Raw file: 20111212\_EXQ5\_AnMi\_QC\_HCMVp1\_11  
 Scan number: 44452  
 Protein: ORFL294W.iORF1 + NC\_006273.2[183230,193441]+ <unknown description>; ORFL294W + NC\_006273.2[183230,193441]+ <unknown description>  
 Peptide score: 134.37  
 Method: FTMS; HCD

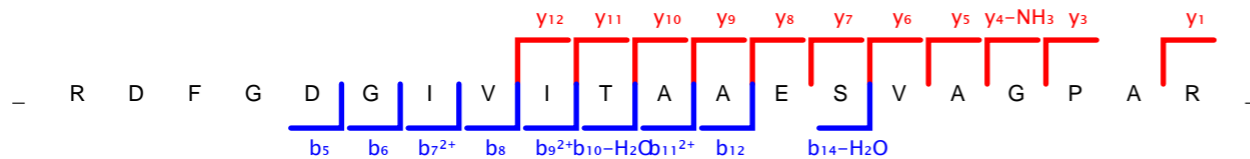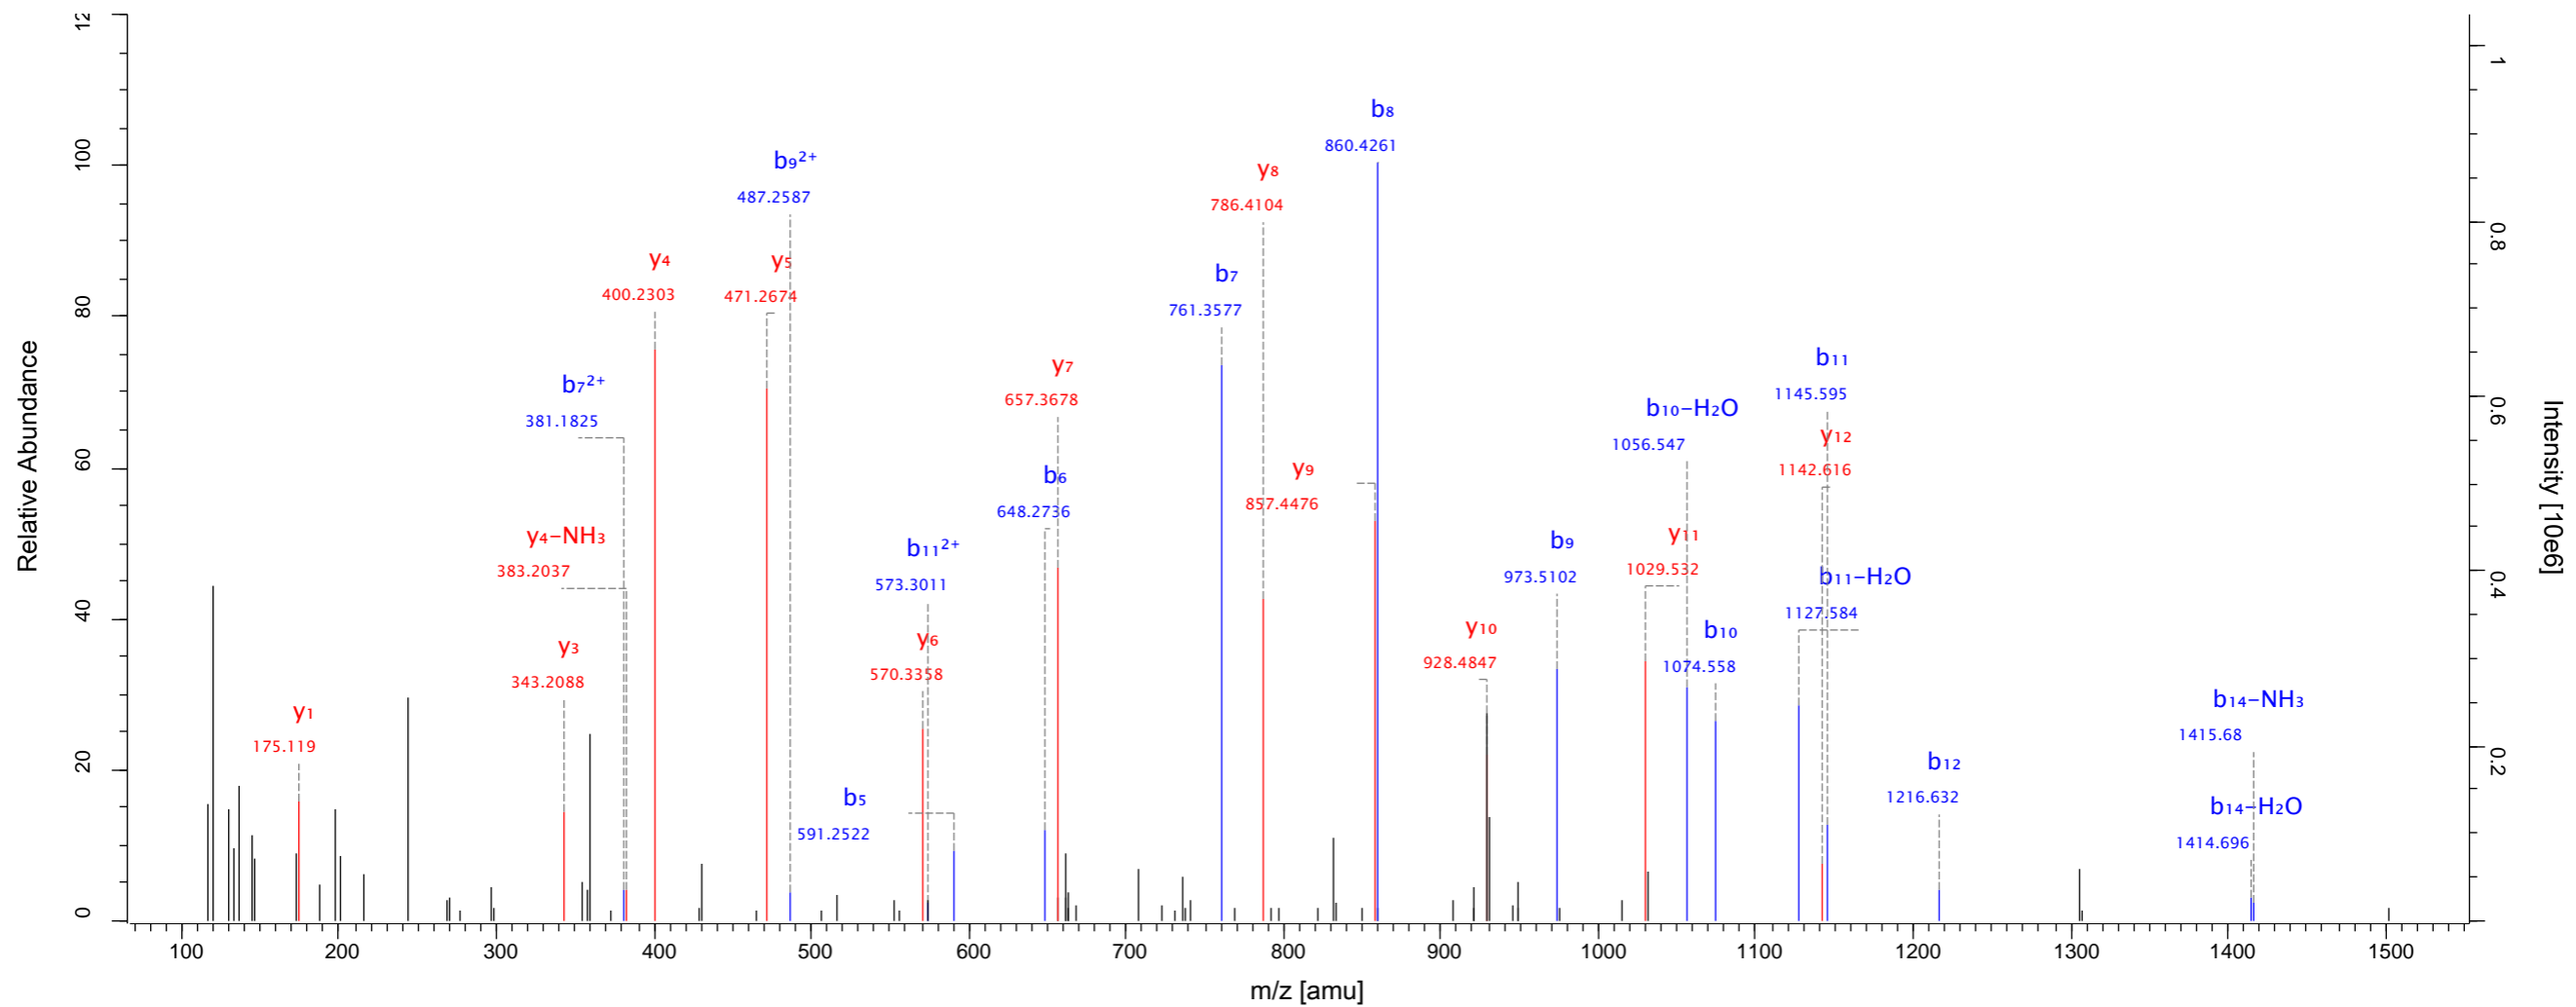

Raw file: 20111212\_EXQ5\_AnMi\_QC\_HCMVp1\_11  
 Scan number: 5266  
 Protein: ORFL234C - NC\_006273.2[148754,149149]- <unknown description>  
 Peptide score: 143.86  
 Method: FTMS; HCD

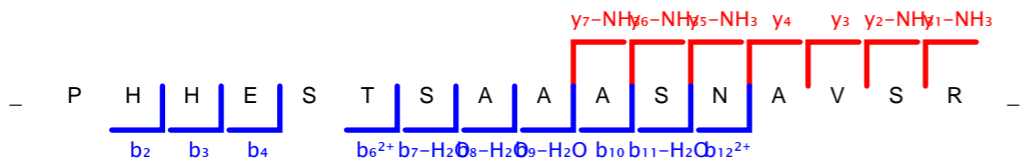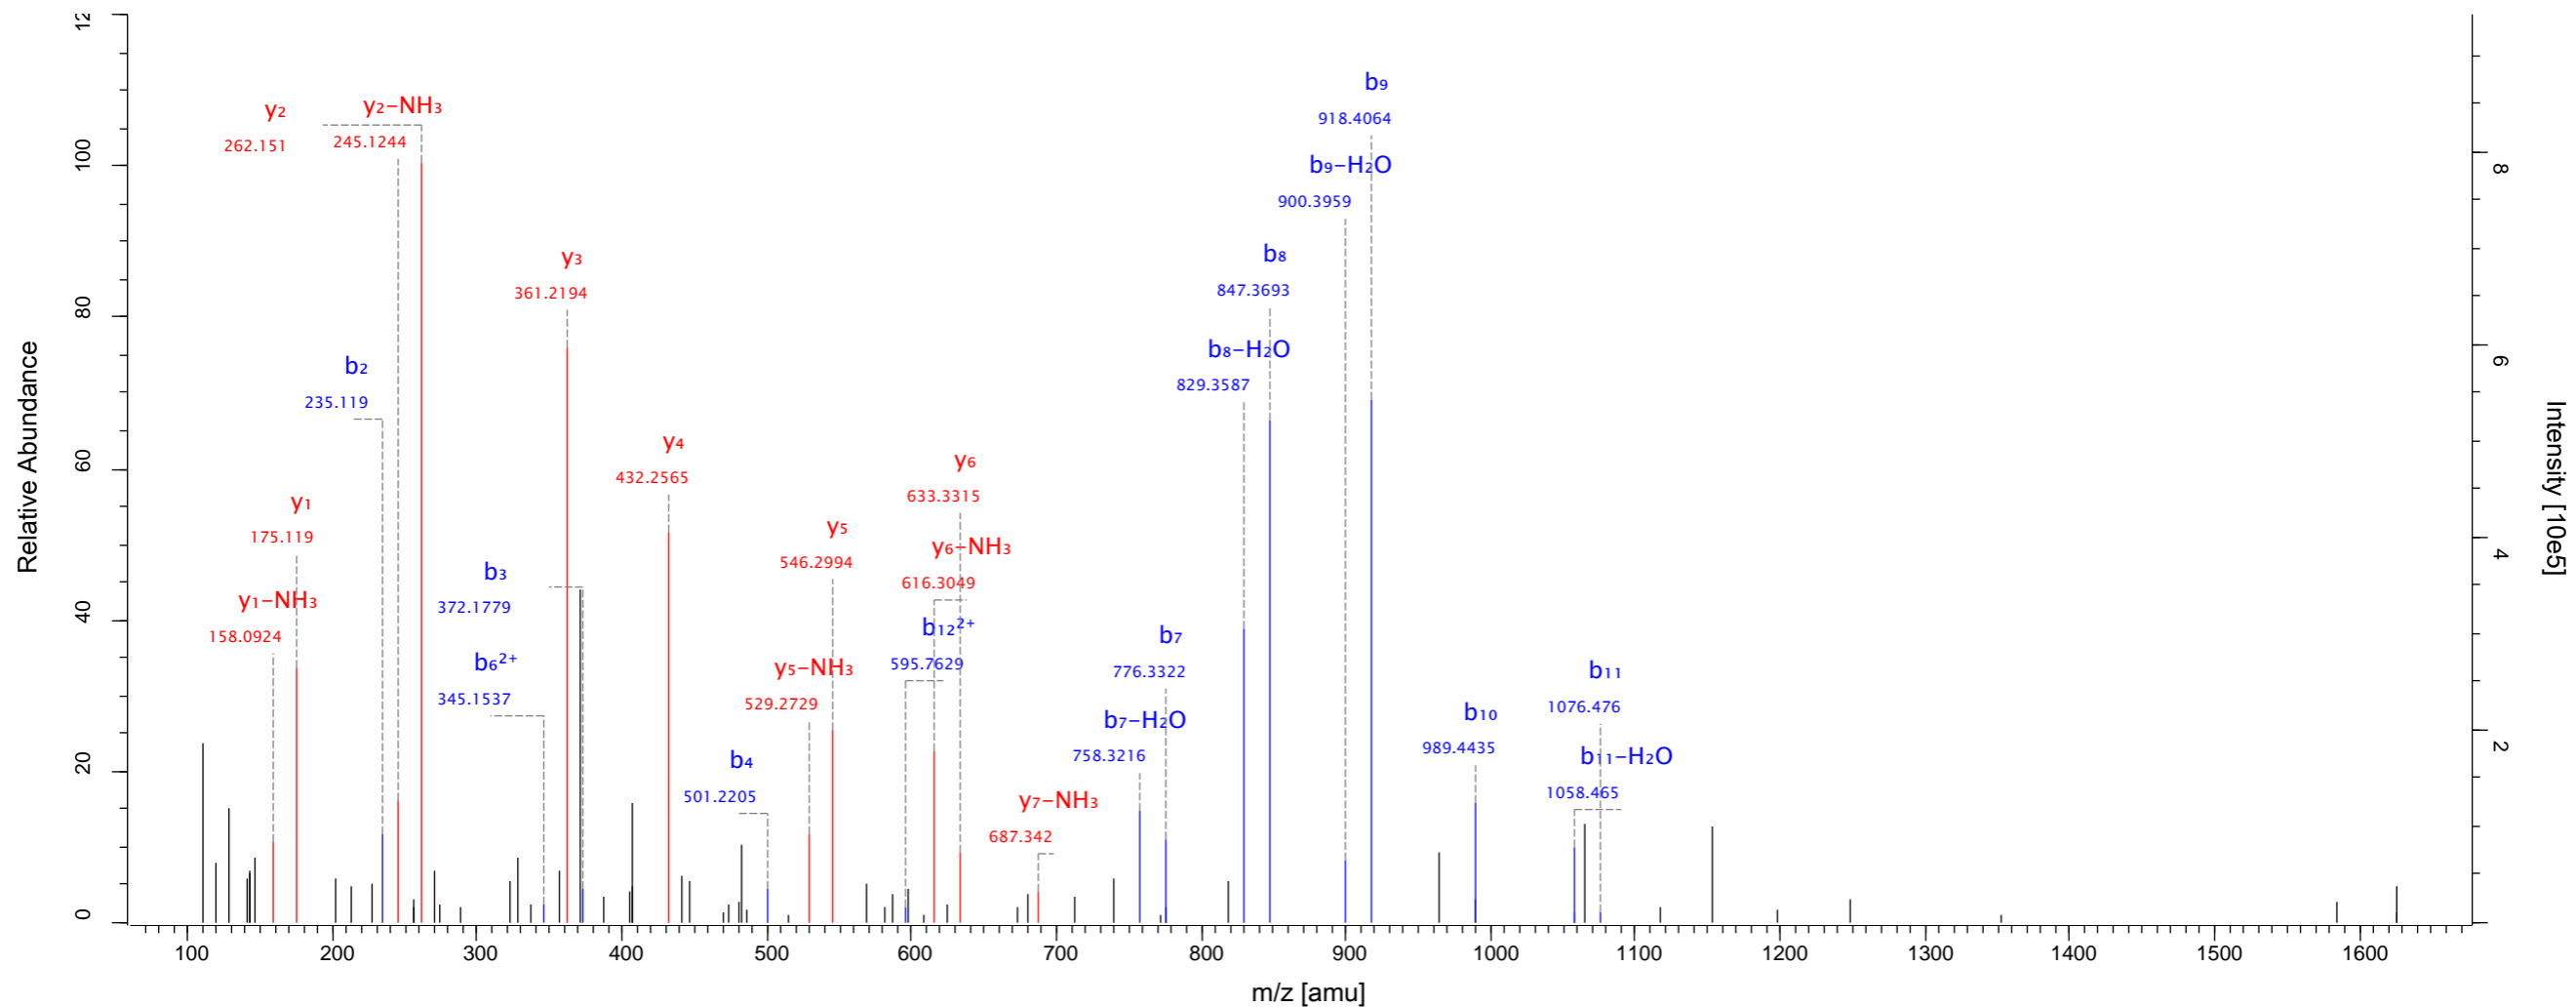

Raw file: 20111212\_EXQ5\_AnMi\_QC\_HCMVp1\_11  
Scan number: 52923  
Protein: ORFL149C.iORF2 - NC\_006273.2[91004,91471]- <unknown description>  
Peptide score: 122.31  
Method: FTMS; HCD

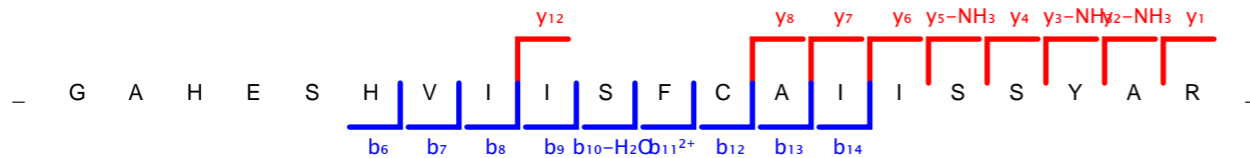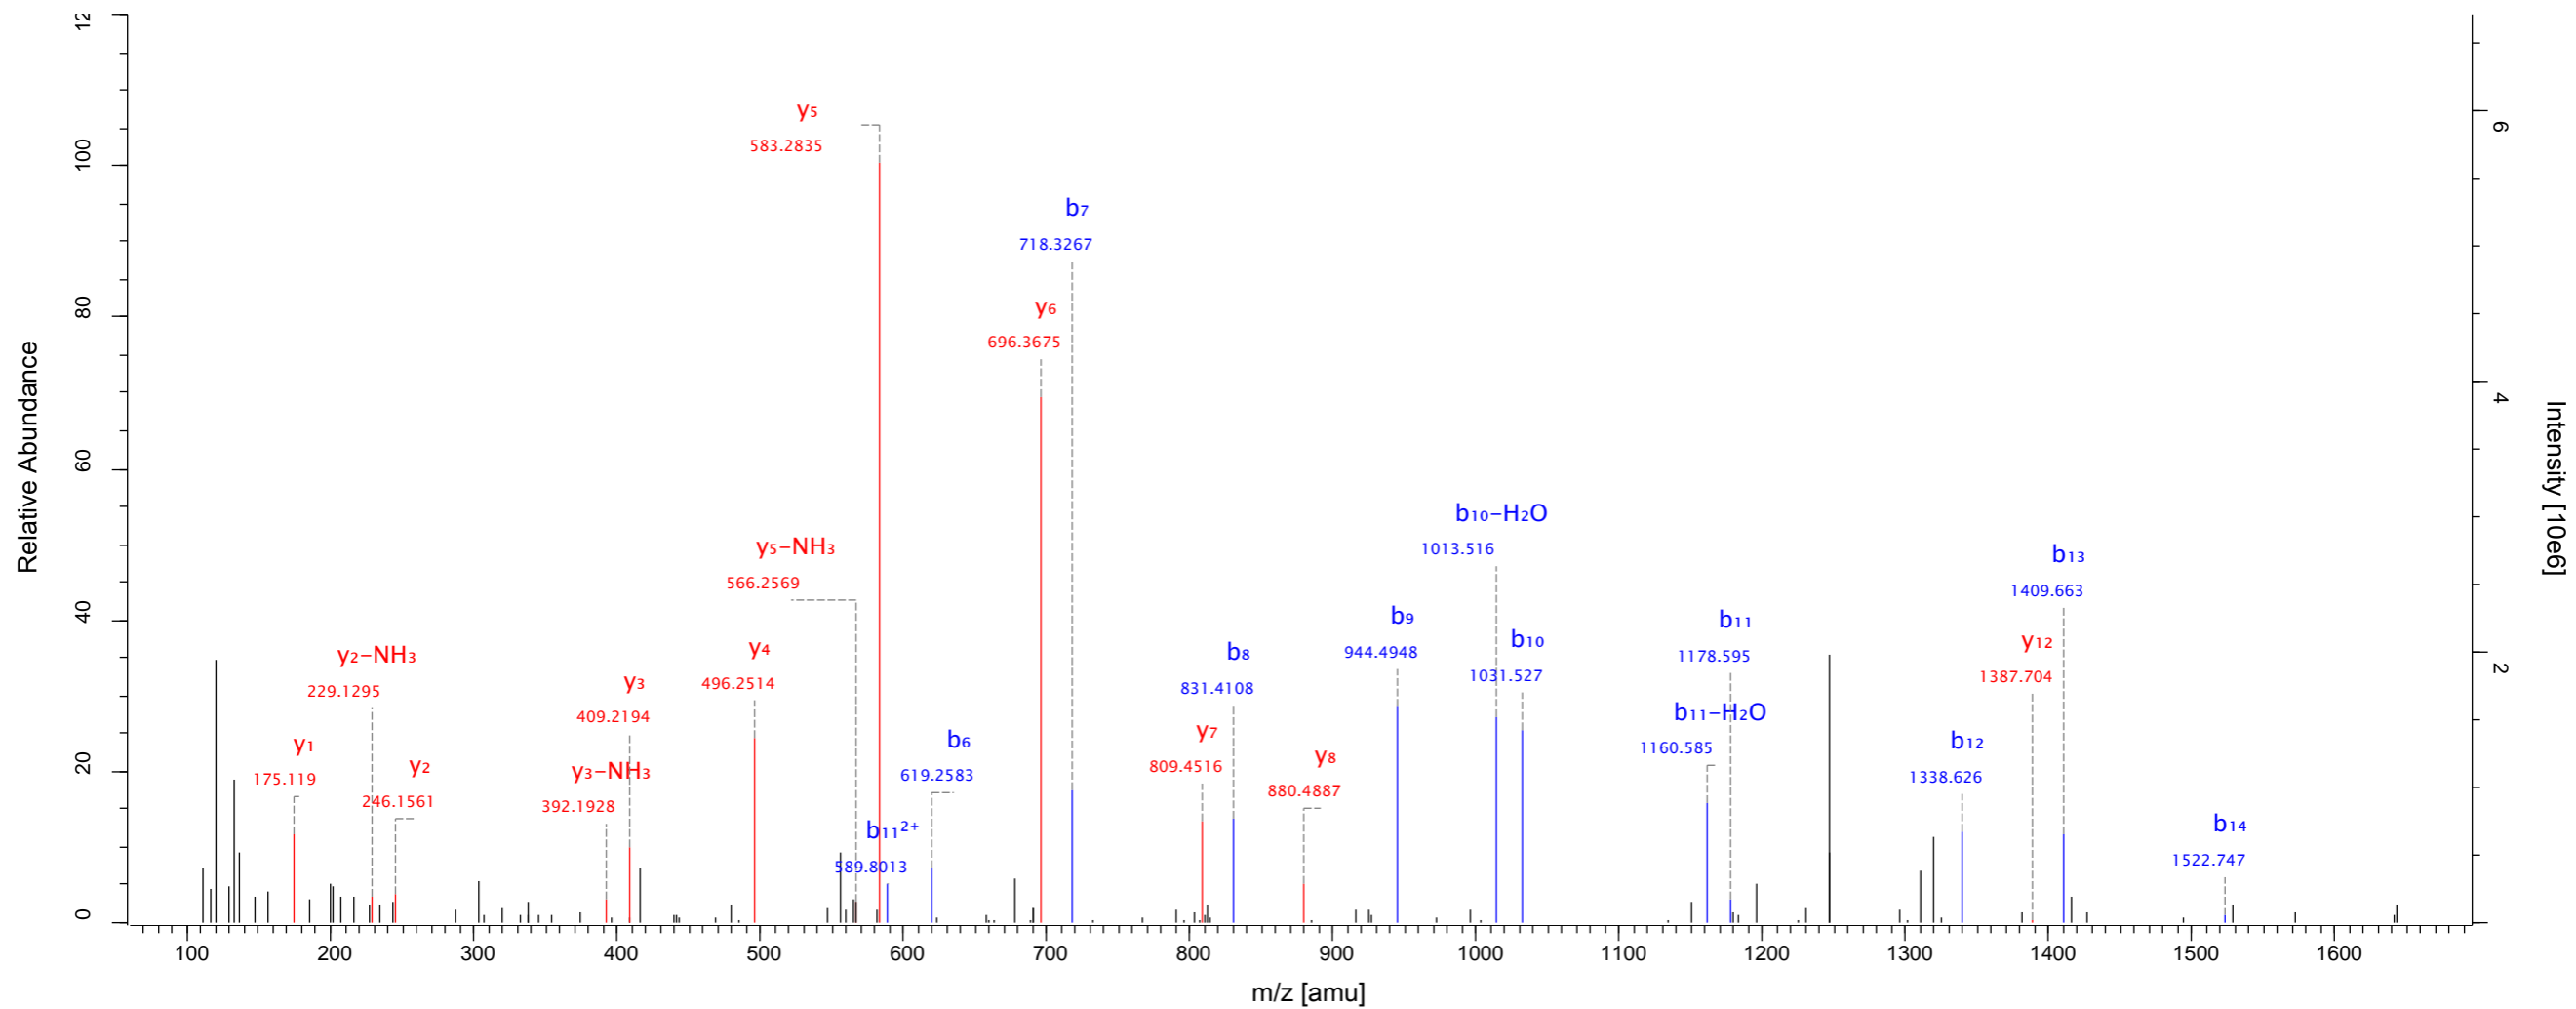

Raw file: 20111212\_EXQ5\_AnMi\_QC\_HCMVp1\_11  
 Scan number: 53553  
 Protein: ORFL130W + NC\_006273.2[72313,72744]+ <unknown description>  
 Peptide score: 141.86  
 Method: FTMS; HCD

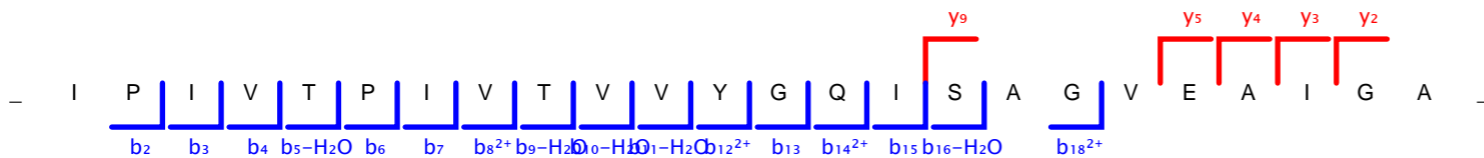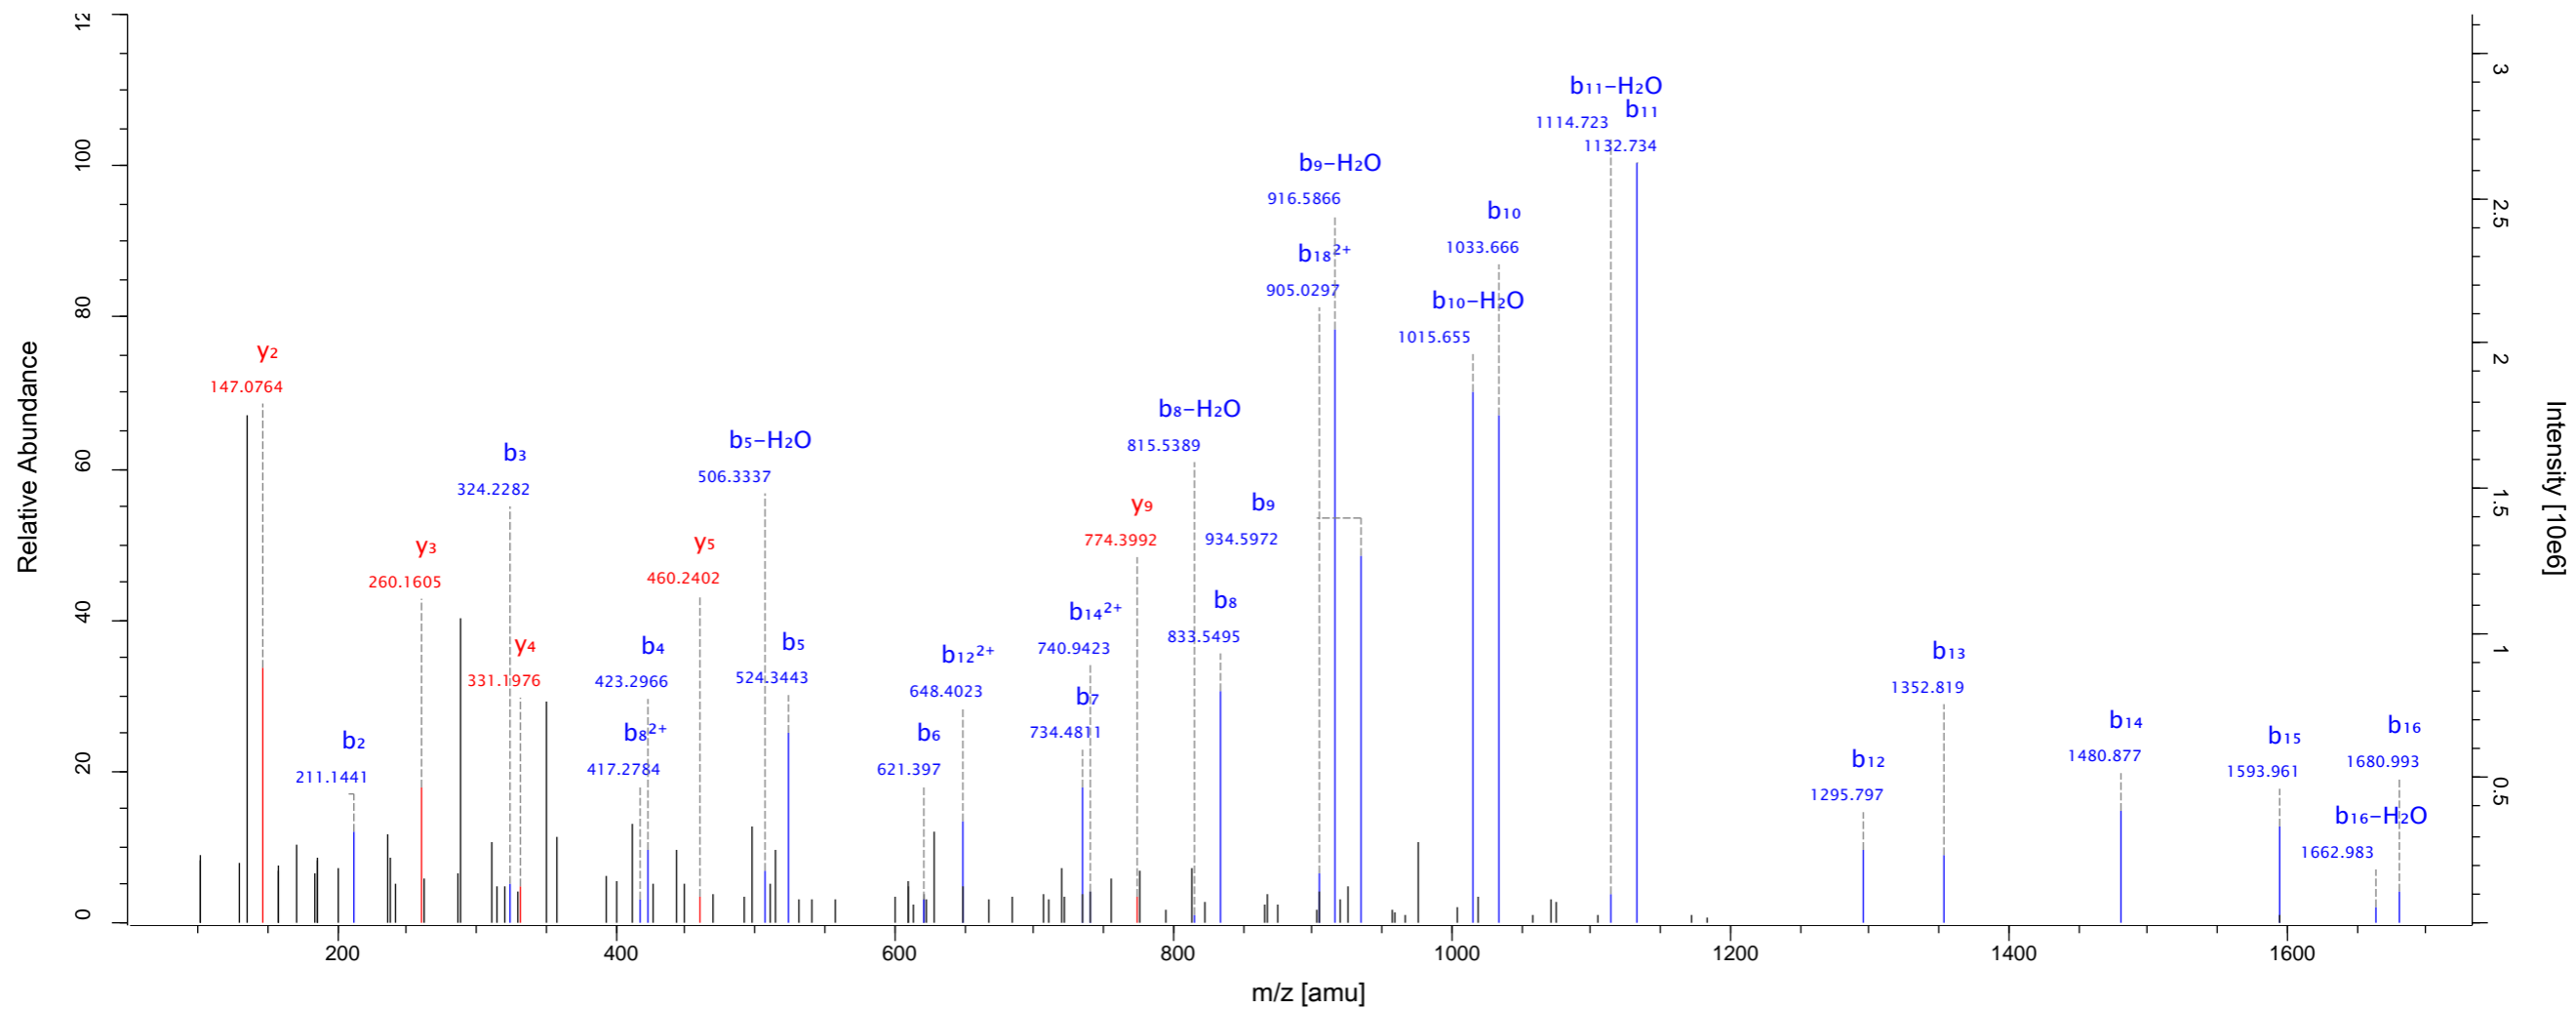

Raw file: 20111212\_EXQ5\_AnMi\_QC\_HCMVp1\_11  
Scan number: 6368  
Protein: ORFL185C - NC\_006273.2[111134,111490]- <unknown description>  
Peptide score: 54.78  
Method: FTMS; HCD

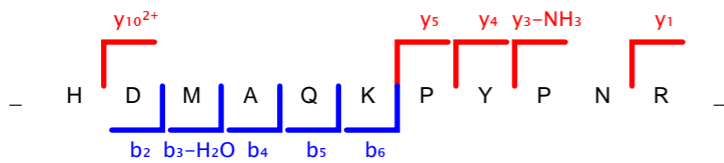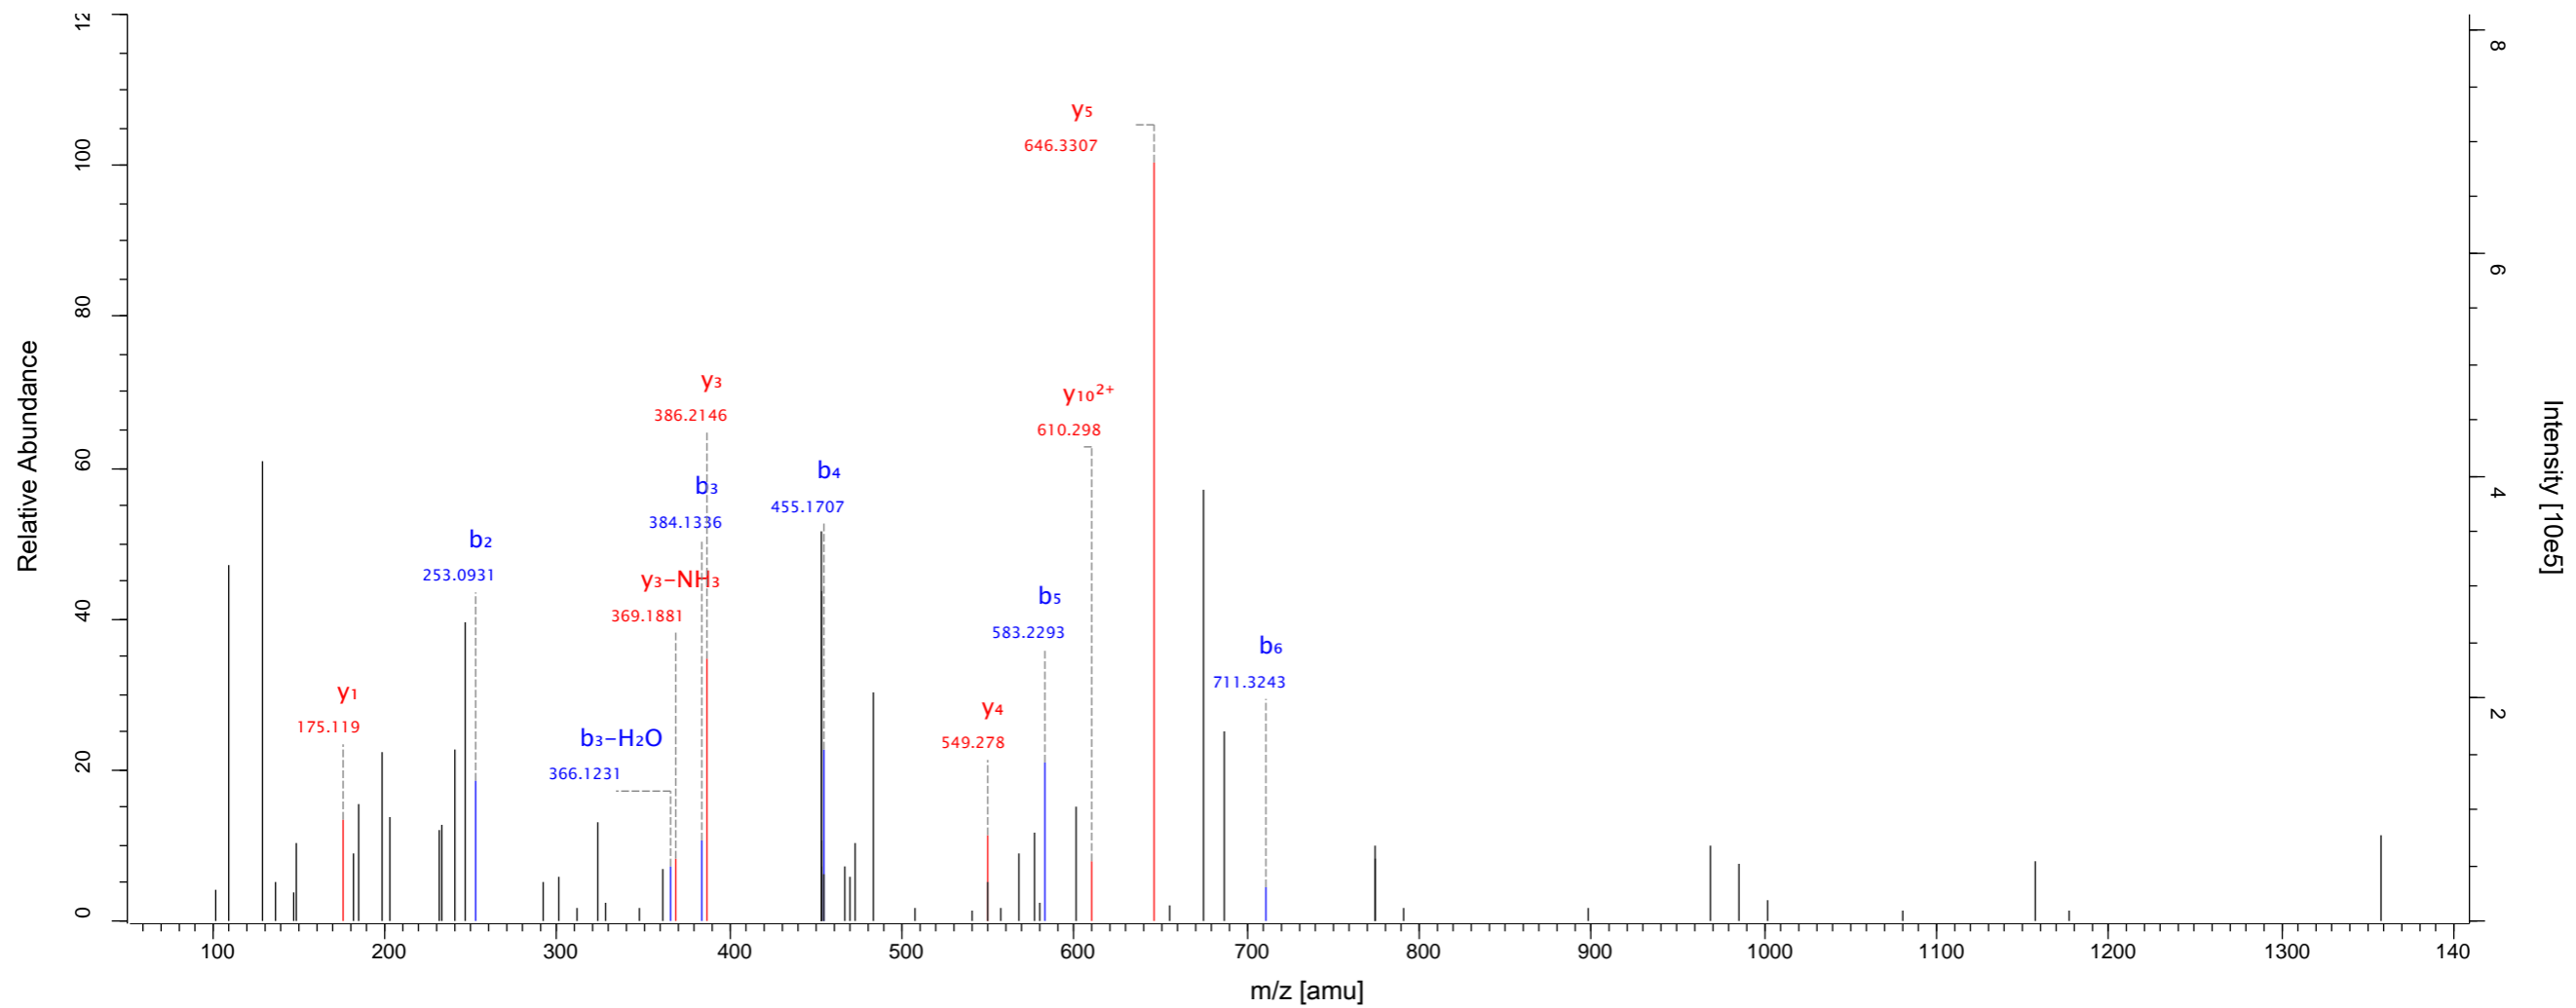



Raw file: 20111212\_EXQ5\_AnMi\_QC\_HCMVp1\_11  
Scan number: 6663  
Protein: ORFL149C.iORF2 - NC\_006273.2[91004,91471]- <unknown description>  
Peptide score: 65.18  
Method: FTMS; HCD

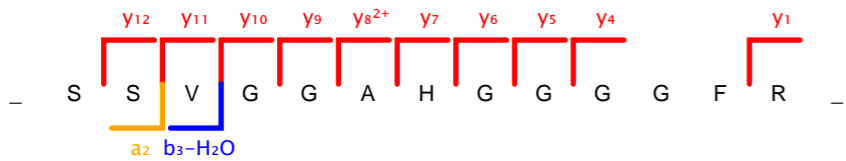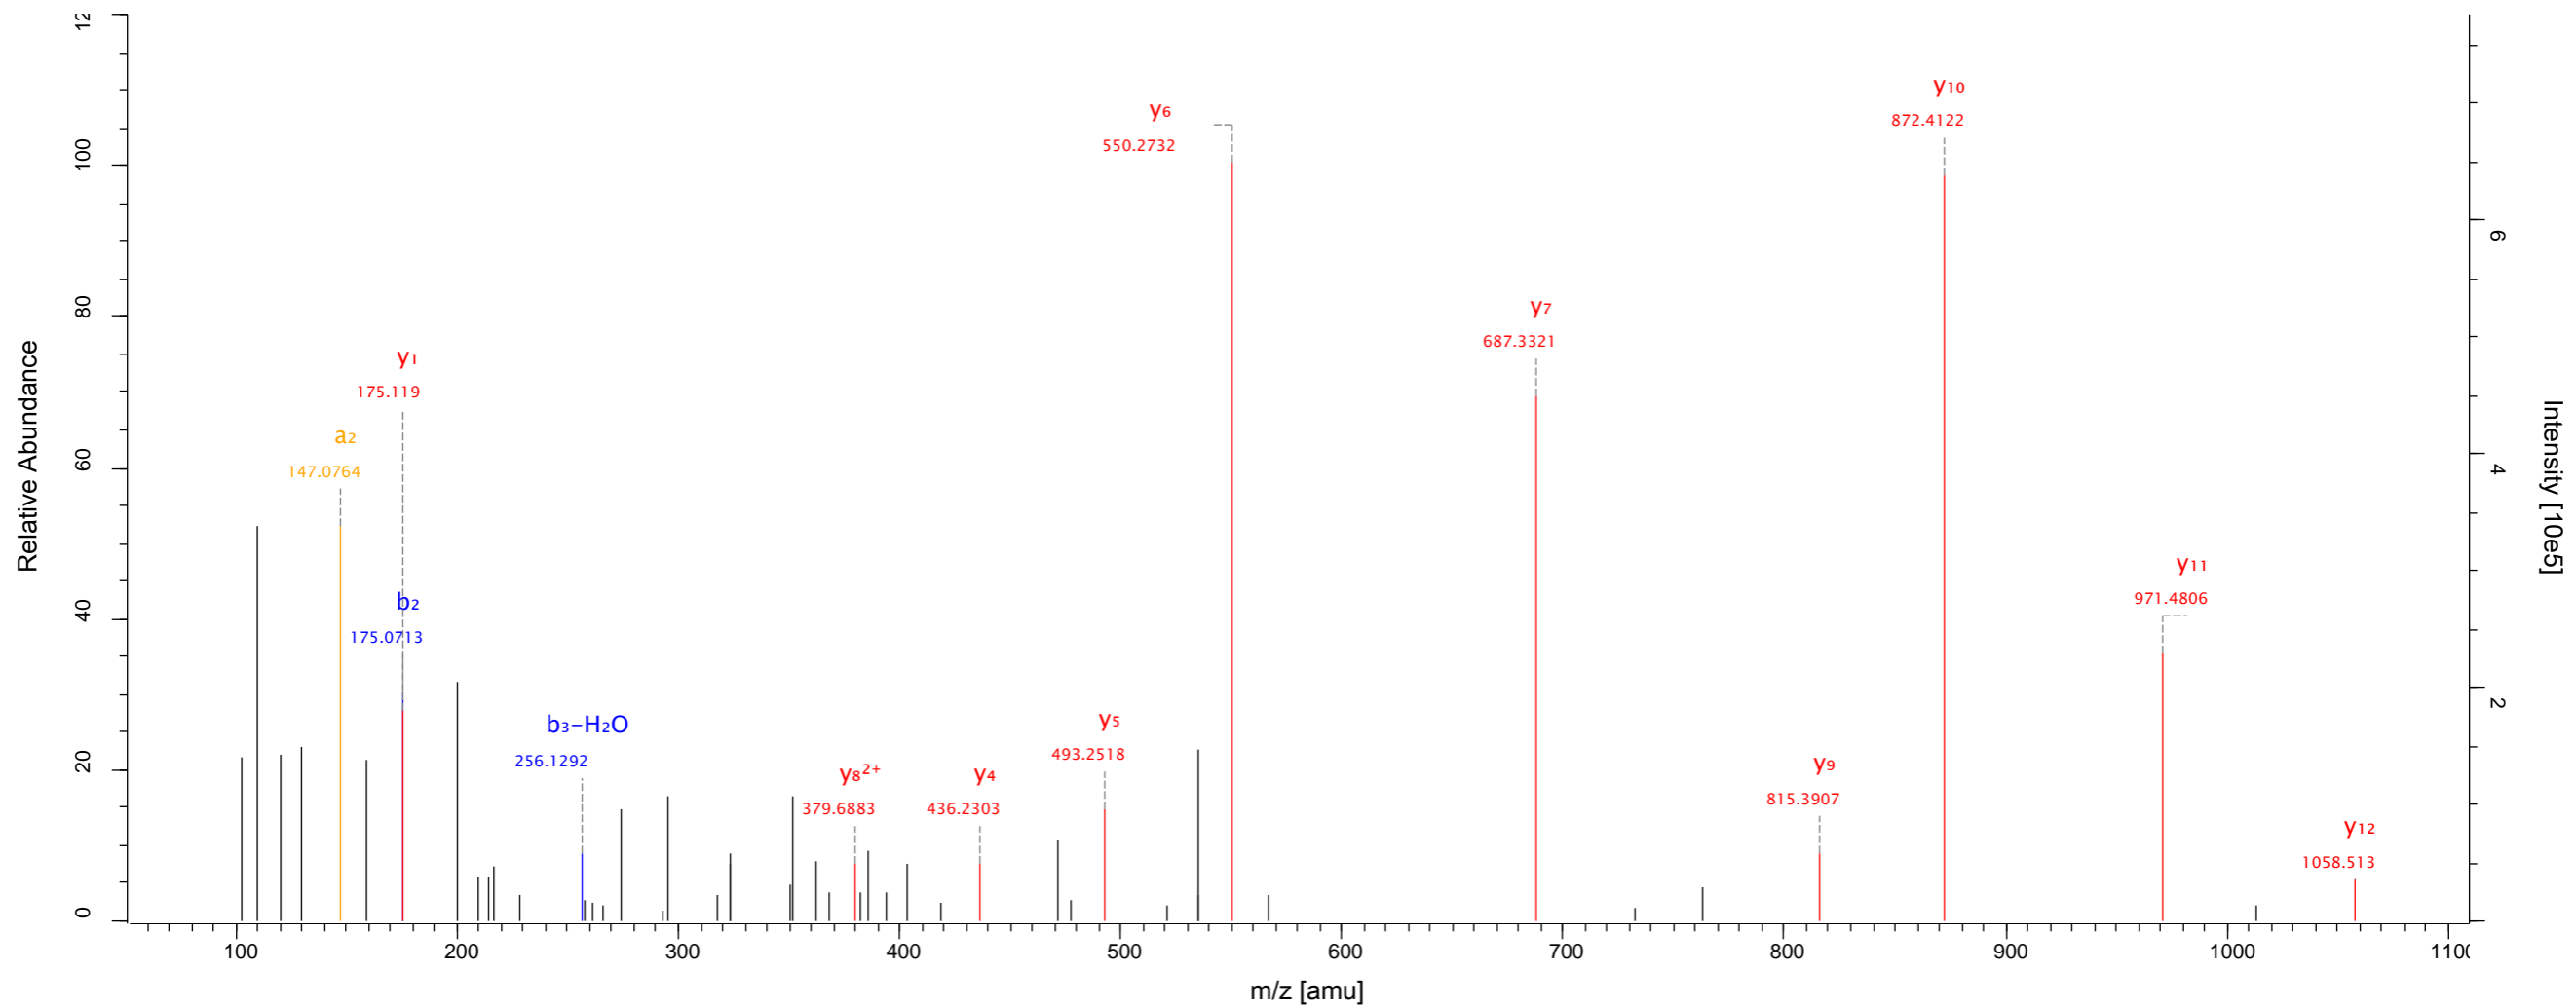

Raw file: 20111212\_EXQ5\_AnMi\_QC\_HCMVp1\_11  
Scan number: 7284  
Protein: ORFL86W + NC\_006273.2[38059,38538]+ <unknown description>  
Peptide score: 104.52  
Method: FTMS; HCD

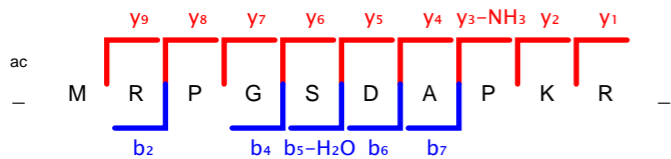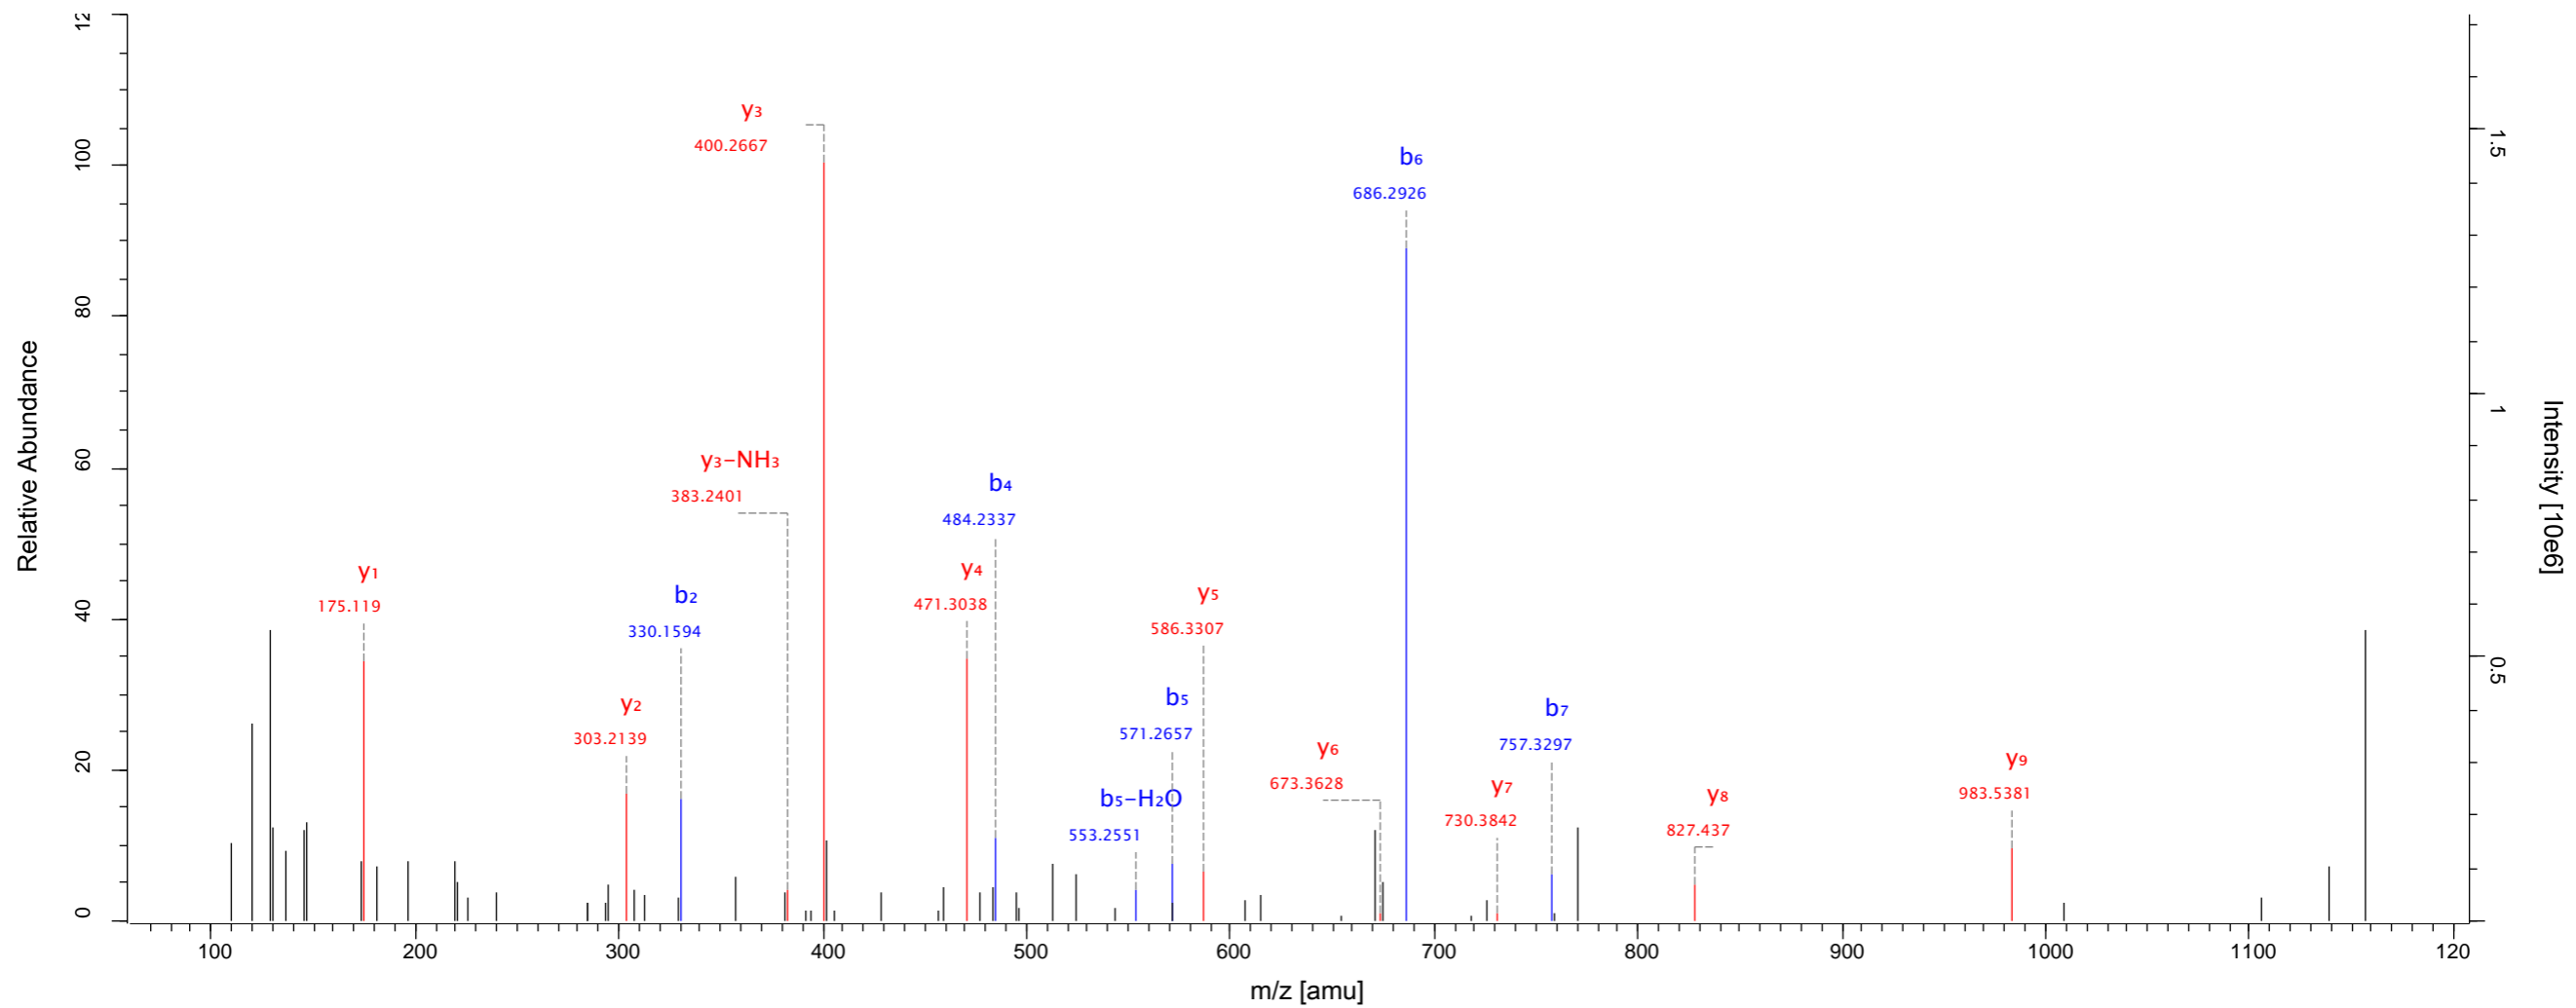

Raw file: 20111212\_EXQ5\_AnMi\_QC\_HCMVp1\_11  
Scan number: 8900  
Protein: ORFL149C.iORF2 - NC\_006273.2[91004,91471]- <unknown description>  
Peptide score: 102.4  
Method: FTMS; HCD

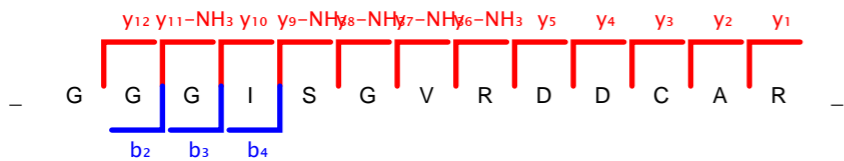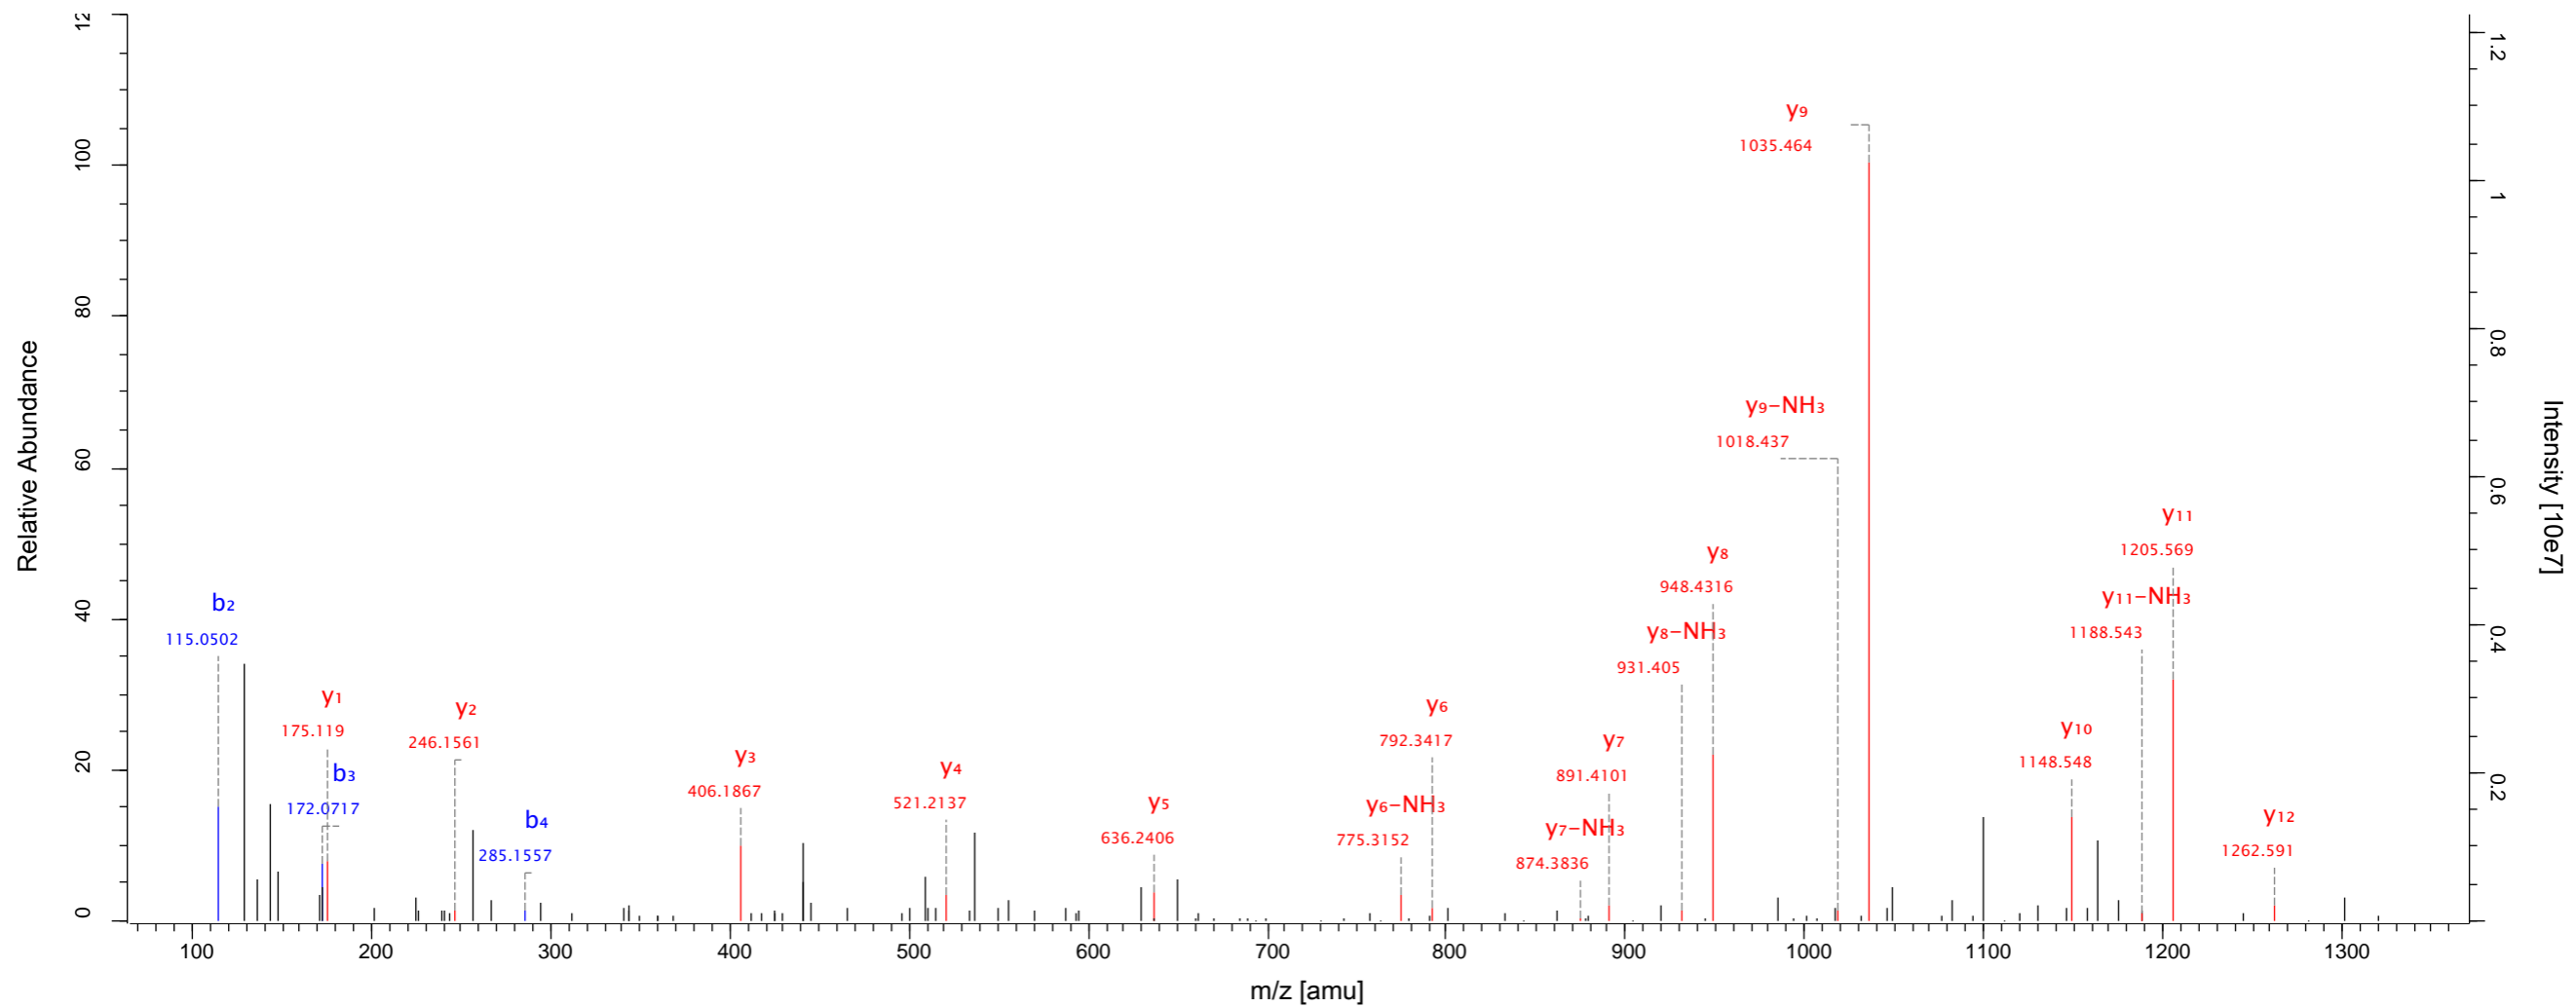

Raw file: 20111212\_EXQ5\_AnMi\_QC\_HCMVp1\_11  
Scan number: 9058  
Protein: ORFL119C - NC\_006273.2[63363,63800]- <unknown description>  
Peptide score: 105.57  
Method: FTMS; HCD

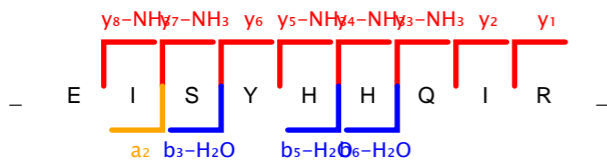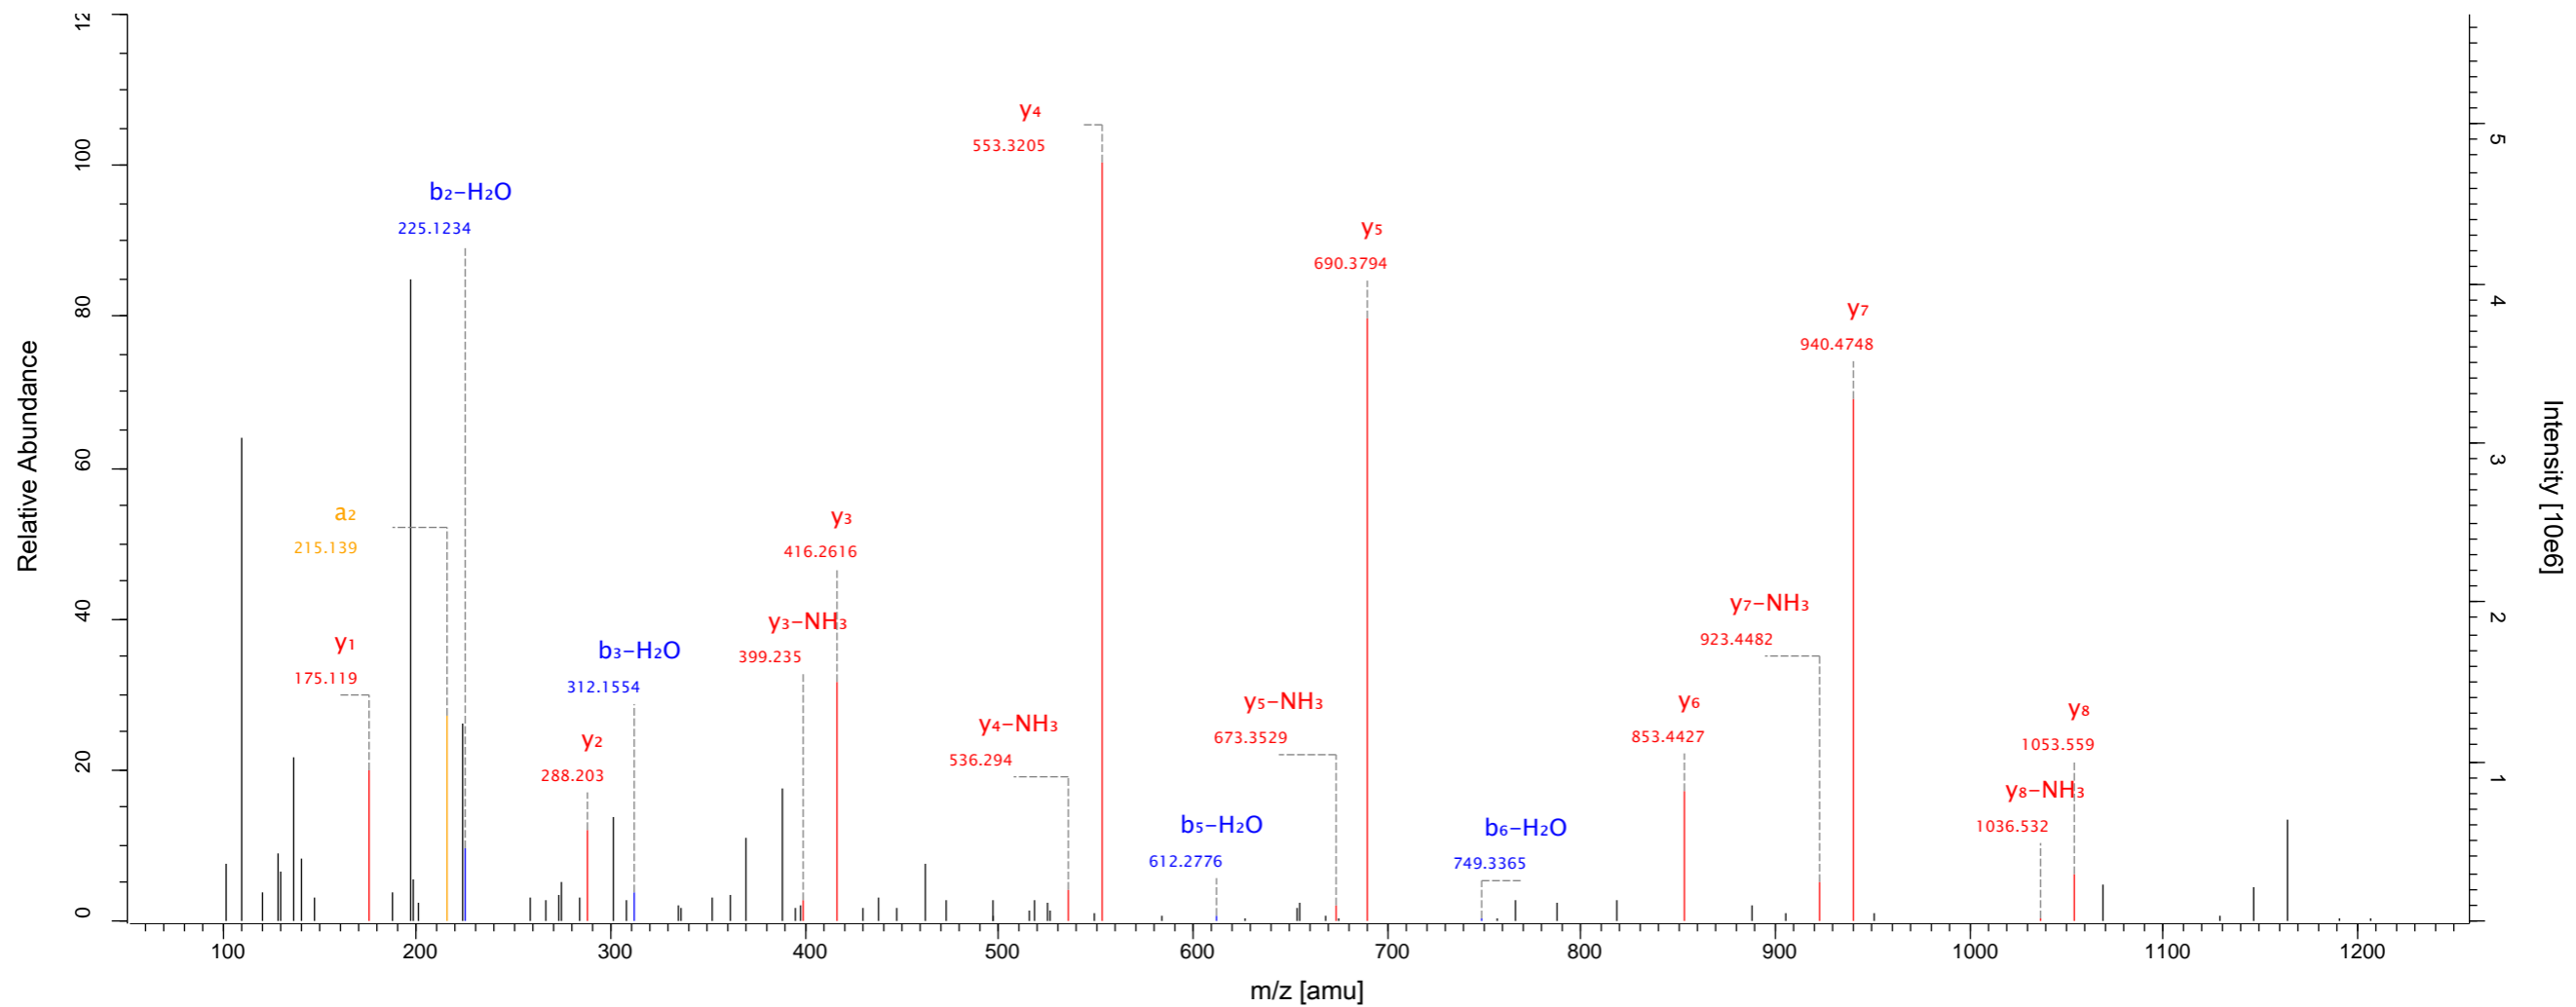

Raw file: 20111212\_EXQ5\_AnMi\_QC\_HCMVp1\_11  
 Scan number: 9344  
 Protein: ORFL130W + NC\_006273.2[72313,72744]+ <unknown description>  
 Peptide score: 179.35  
 Method: FTMS; HCD

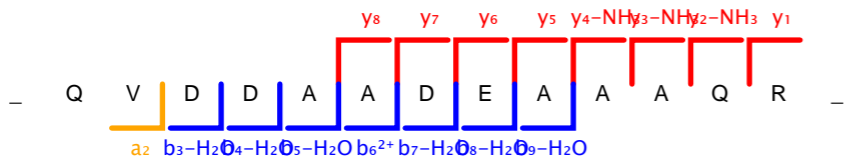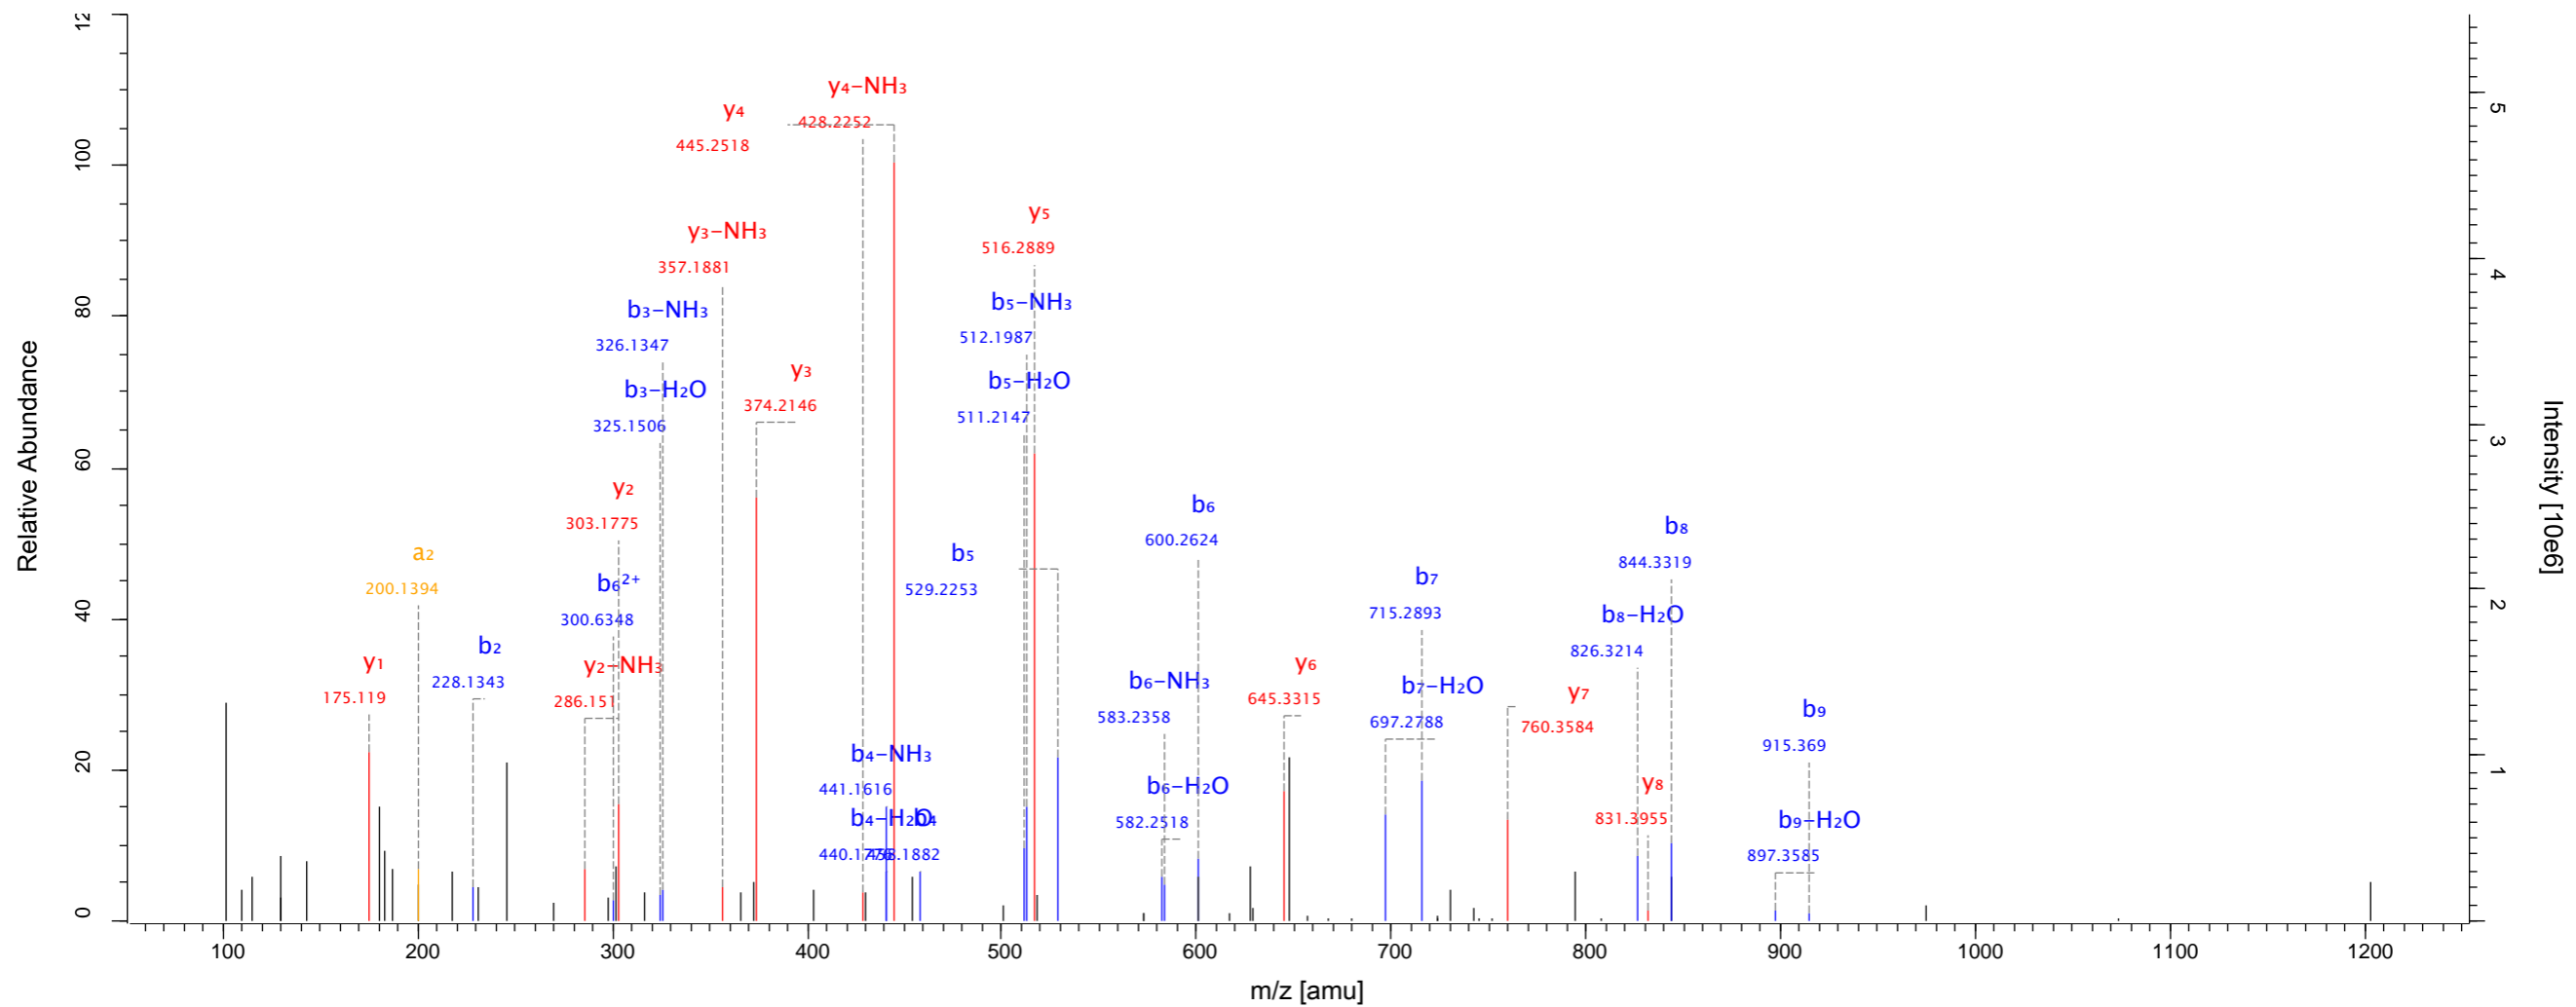

Raw file: 20111212\_EXQ5\_AnMi\_QC\_HCMVp1\_11  
Scan number: 9835  
Protein: ORFL130W + NC\_006273.2[72313,72744]+ <unknown description>  
Peptide score: 86.79  
Method: FTMS; HCD

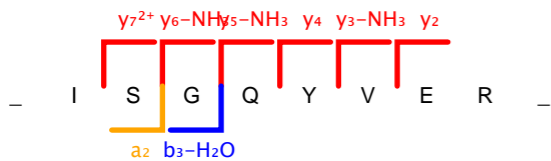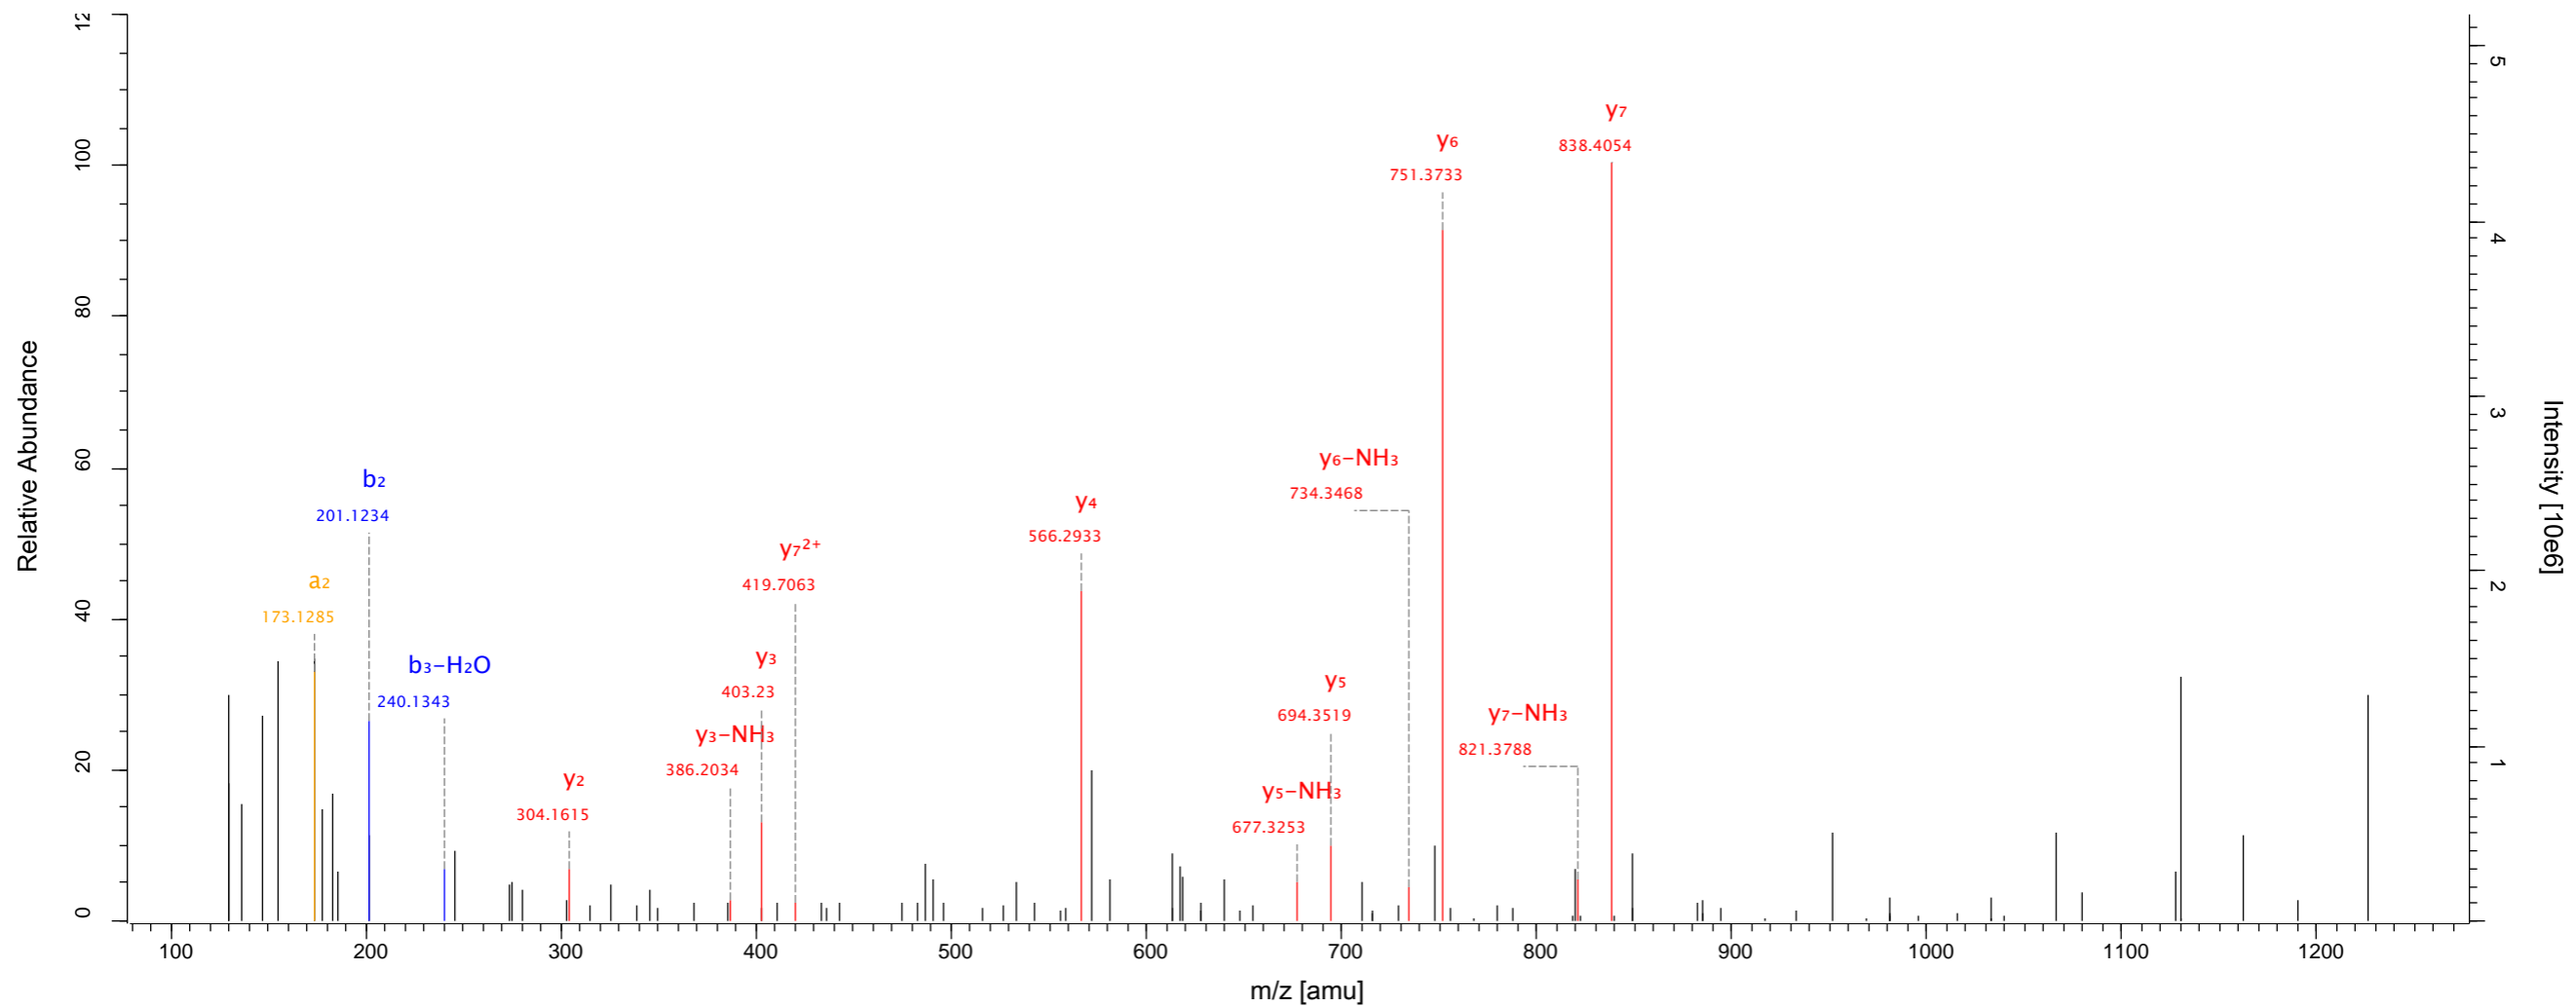

Raw file: 20111212\_EXQ5\_AnMi\_QC\_HCMVp11\_12  
Scan number: 10528  
Protein: ORFL114W + NC\_006273.2[60151,60708]+ <unknown description>  
Peptide score: 66.26  
Method: FTMS; HCD

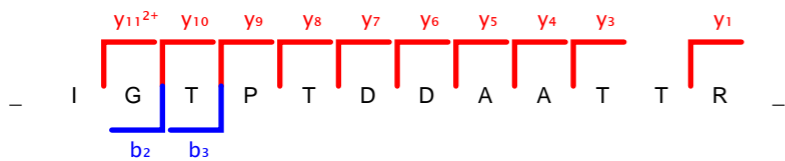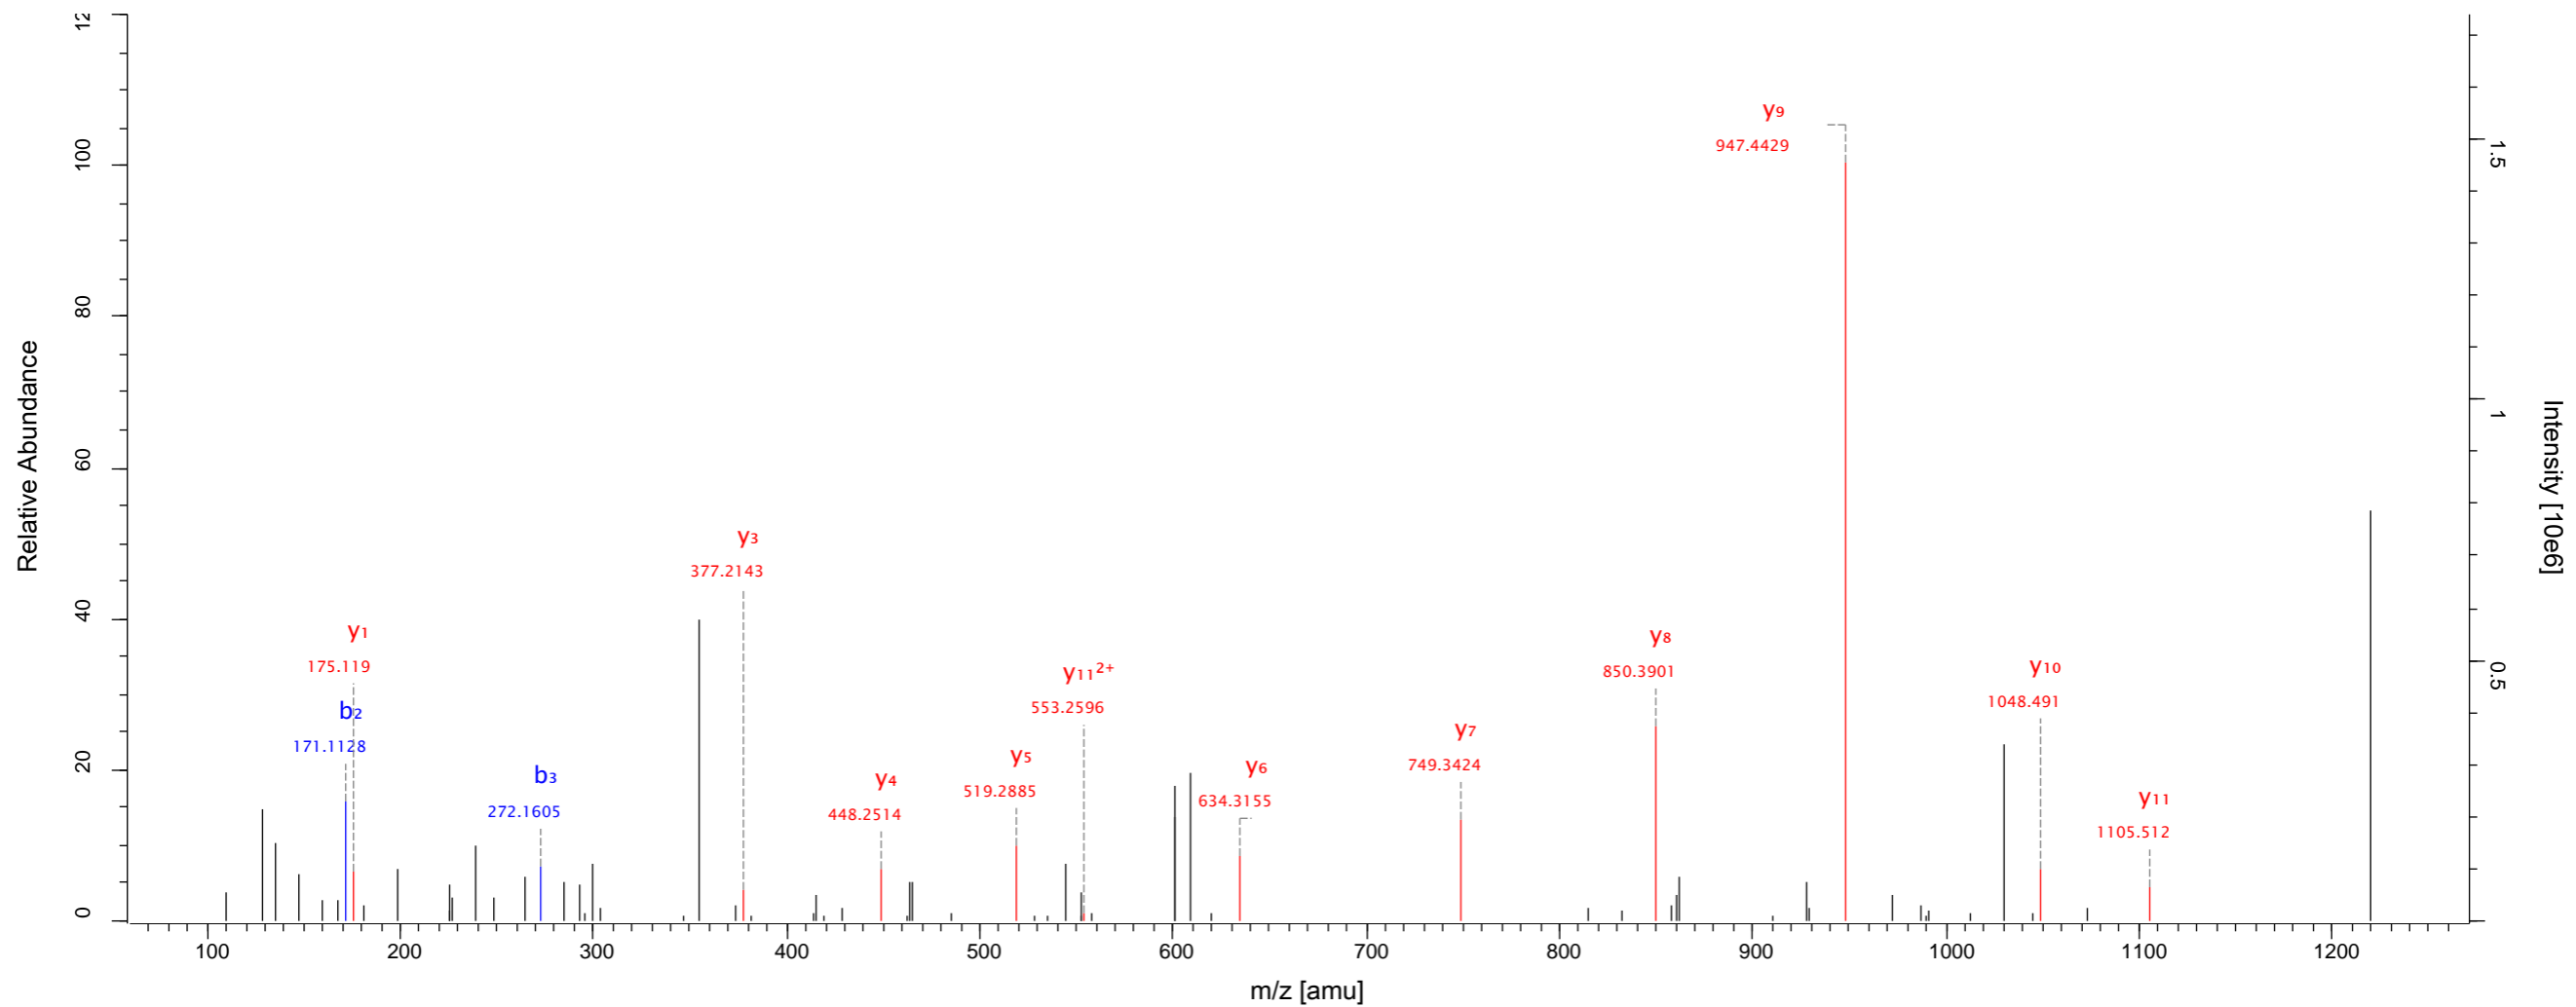

Raw file: 20111212\_EXQ5\_AnMi\_QC\_HCMVp1\_12  
Scan number: 11217  
Protein: ORFL82W + NC\_006273.2[36796,37488]+ <unknown description>  
Peptide score: 110.39  
Method: FTMS; HCD

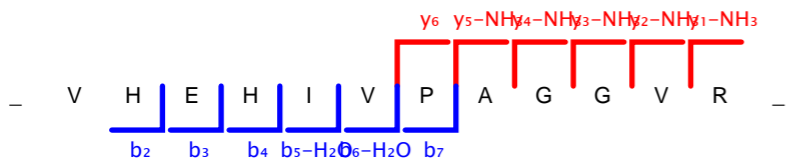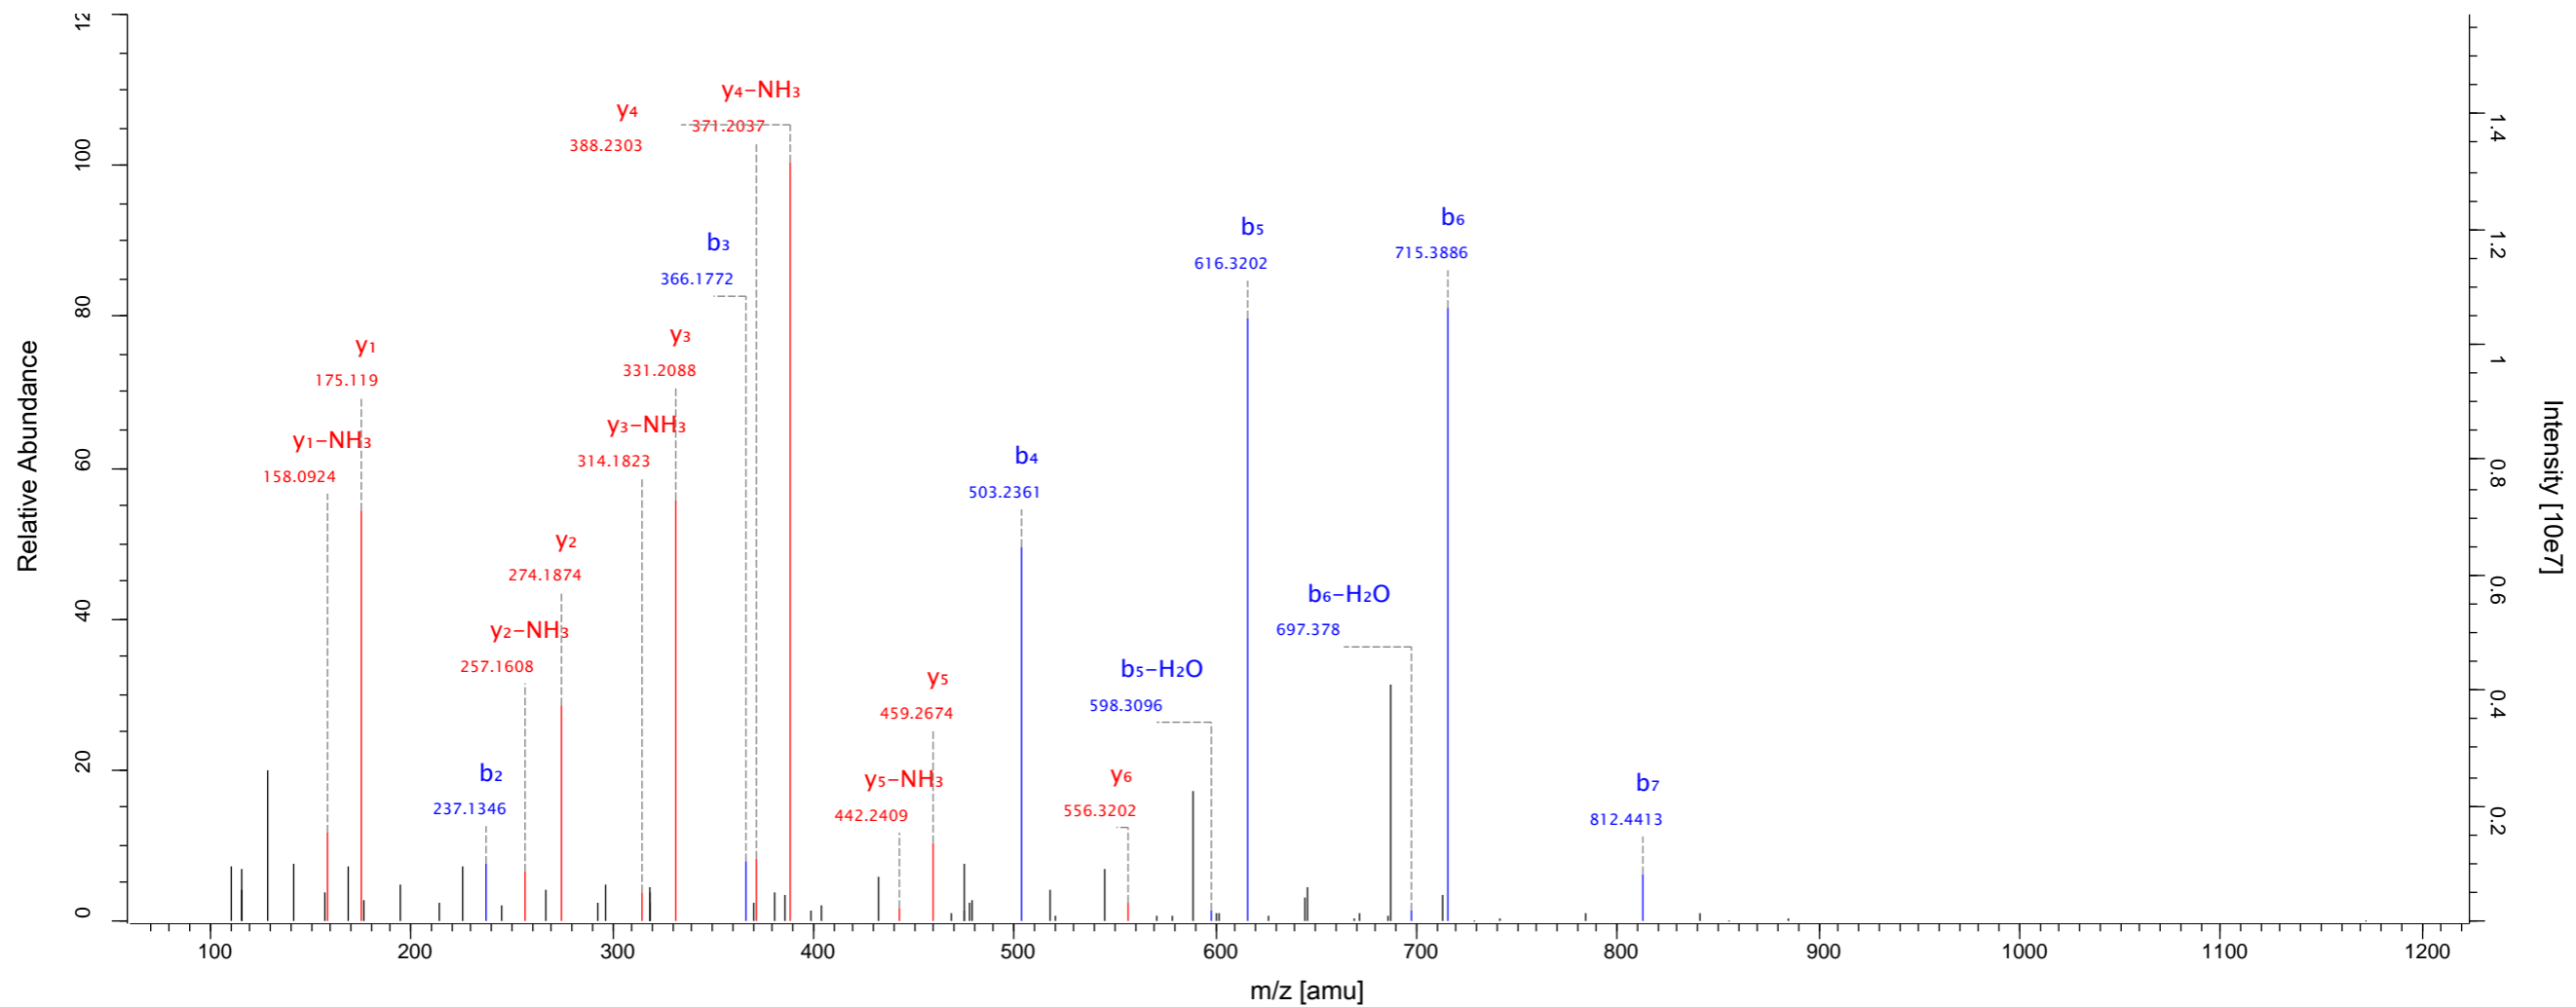



Raw file: 20111212\_EXQ5\_AnMi\_QC\_HCMVp1\_12  
Scan number: 12247  
Protein: ORFL82W + NC\_006273.2[36796,37488]+ <unknown description>  
Peptide score: 59.43  
Method: FTMS; HCD

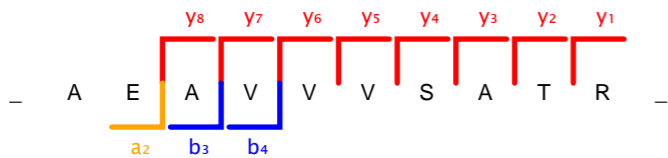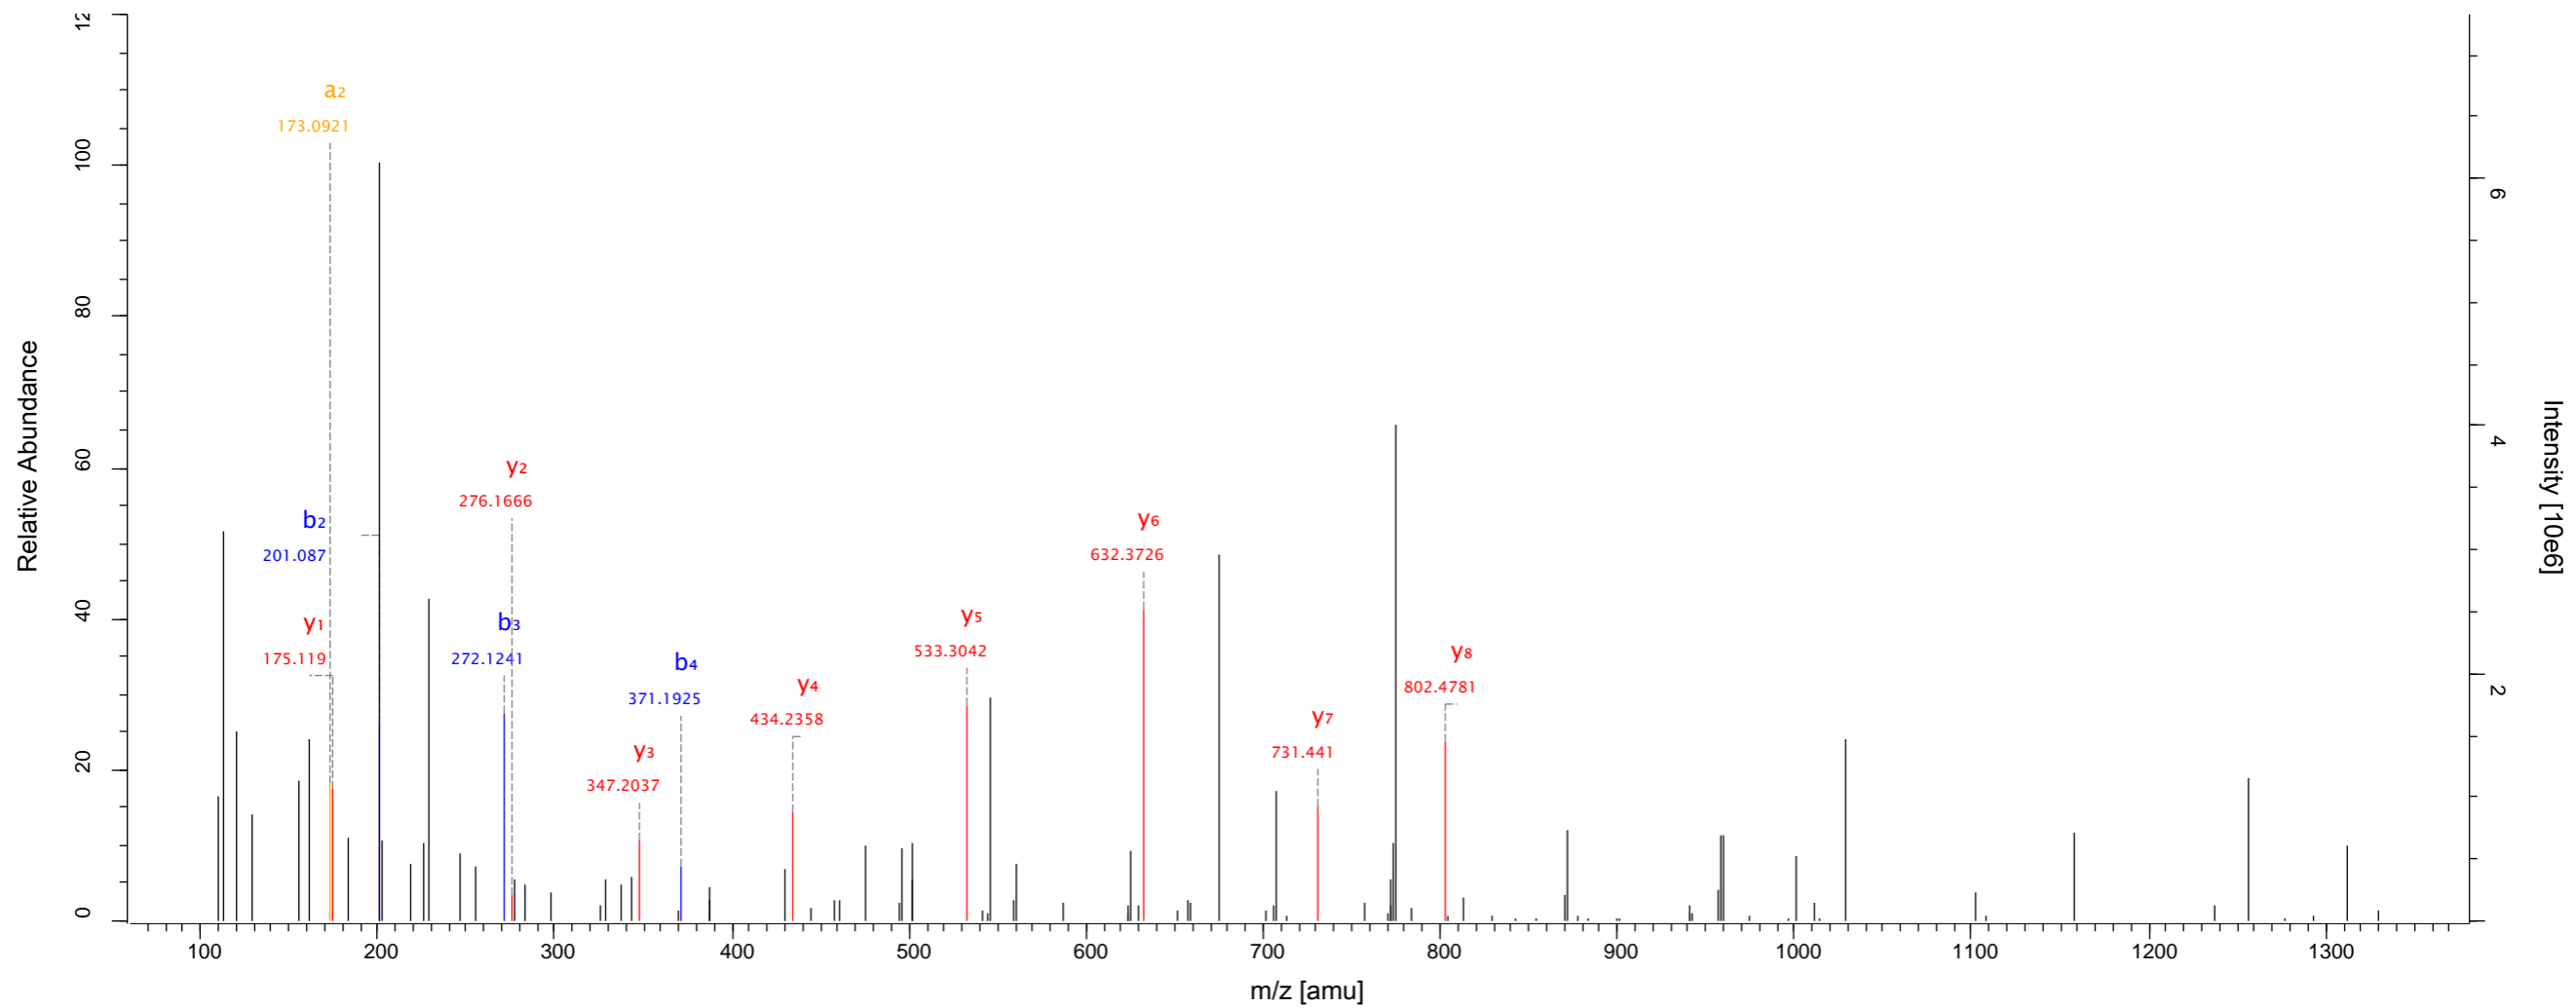

Raw file: 20111212\_EXQ5\_AnMi\_QC\_HCMVp1\_12  
Scan number: 12830  
Protein: ORFL82W + NC\_006273.2[36796,37488]+ <unknown description>  
Peptide score: 80.53  
Method: FTMS; HCD

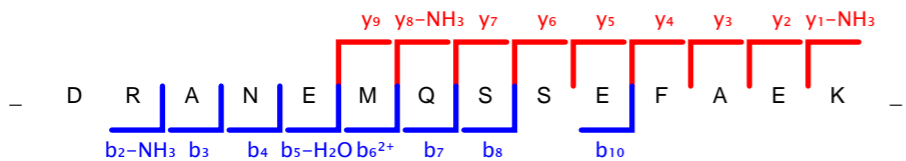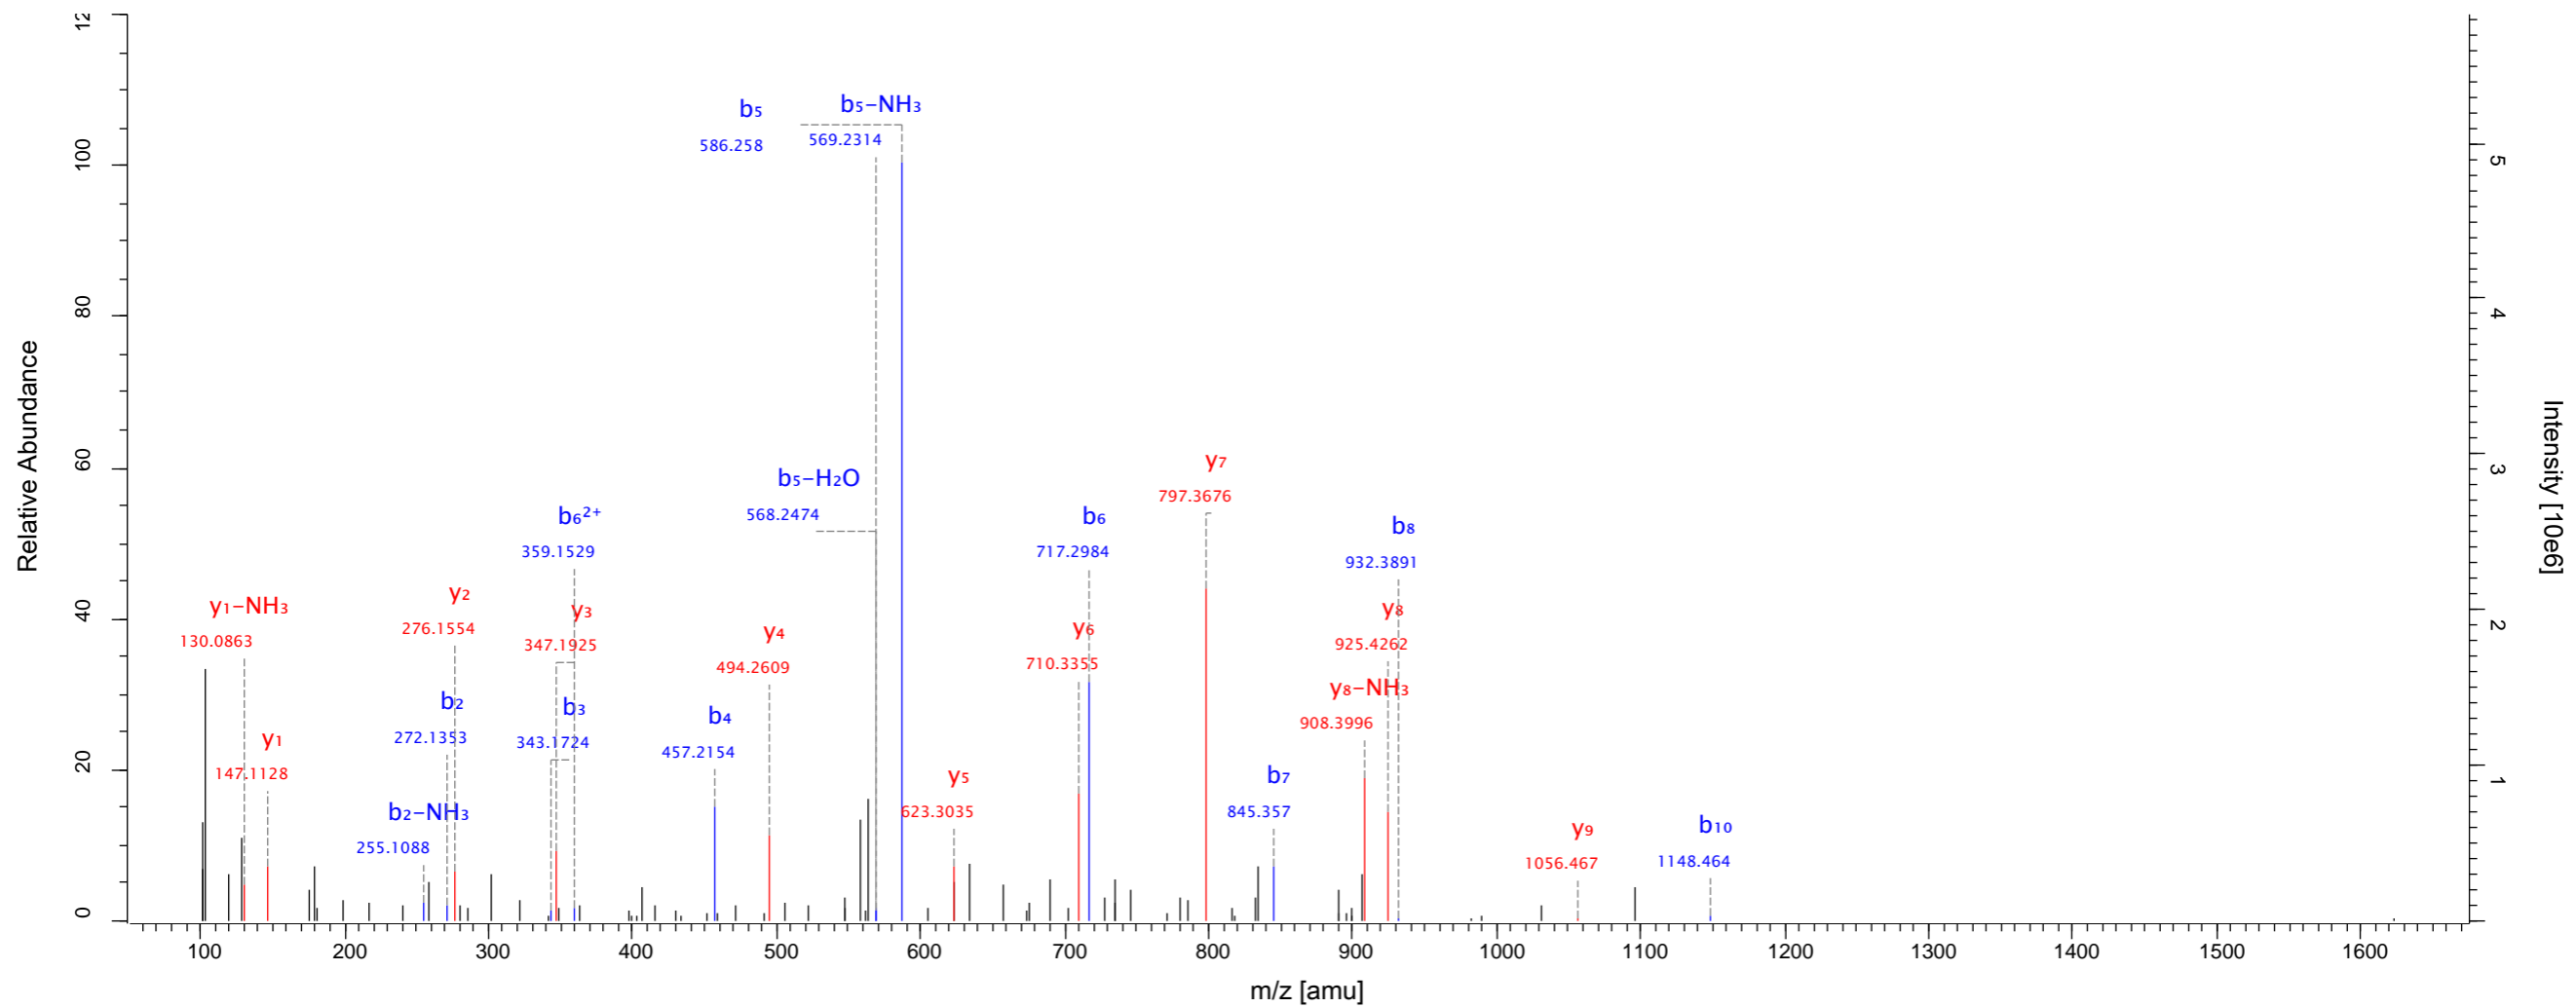

Raw file: 20111212\_EXQ5\_AnMi\_QC\_HCMVp1\_12  
Scan number: 14417  
Protein: ORFL299W + NC\_006273.2[185047,185685]+ <unknown description>  
Peptide score: 116.73  
Method: FTMS; HCD

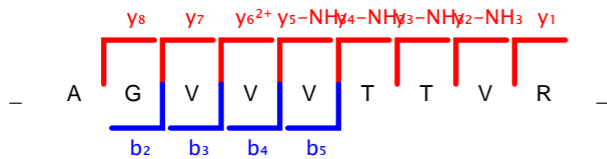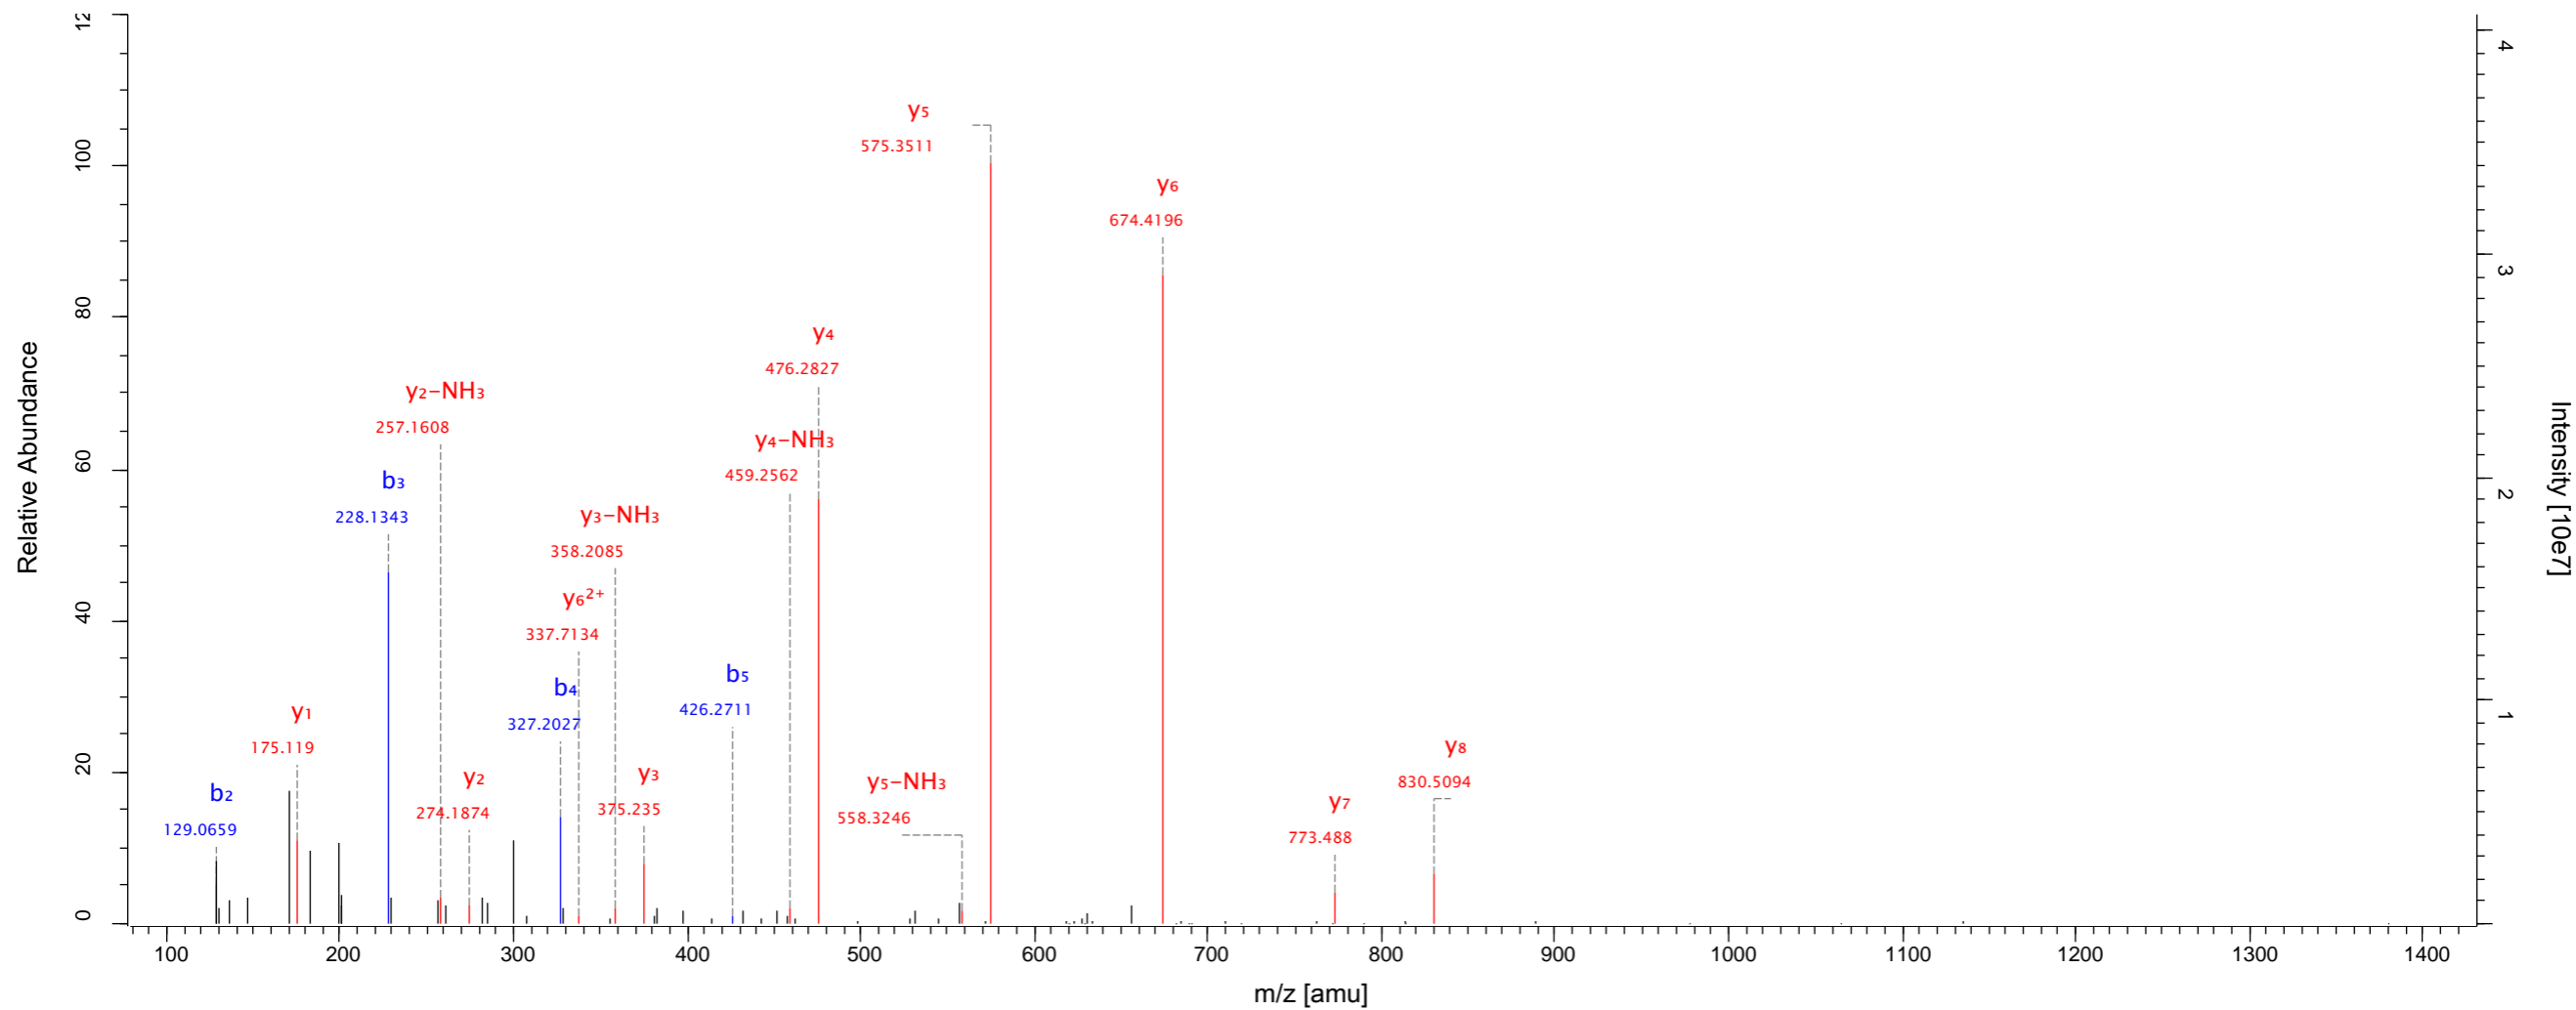

Raw file: 20111212\_EXQ5\_AnMi\_QC\_HCMVp1\_12  
 Scan number: 19337  
 Protein: ORFL82W + NC\_006273.2[36796,37488]+ <unknown description>  
 Peptide score: 105.14  
 Method: FTMS; HCD

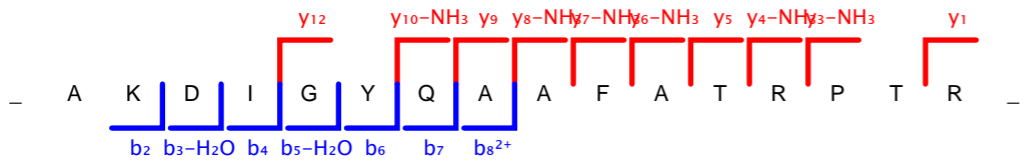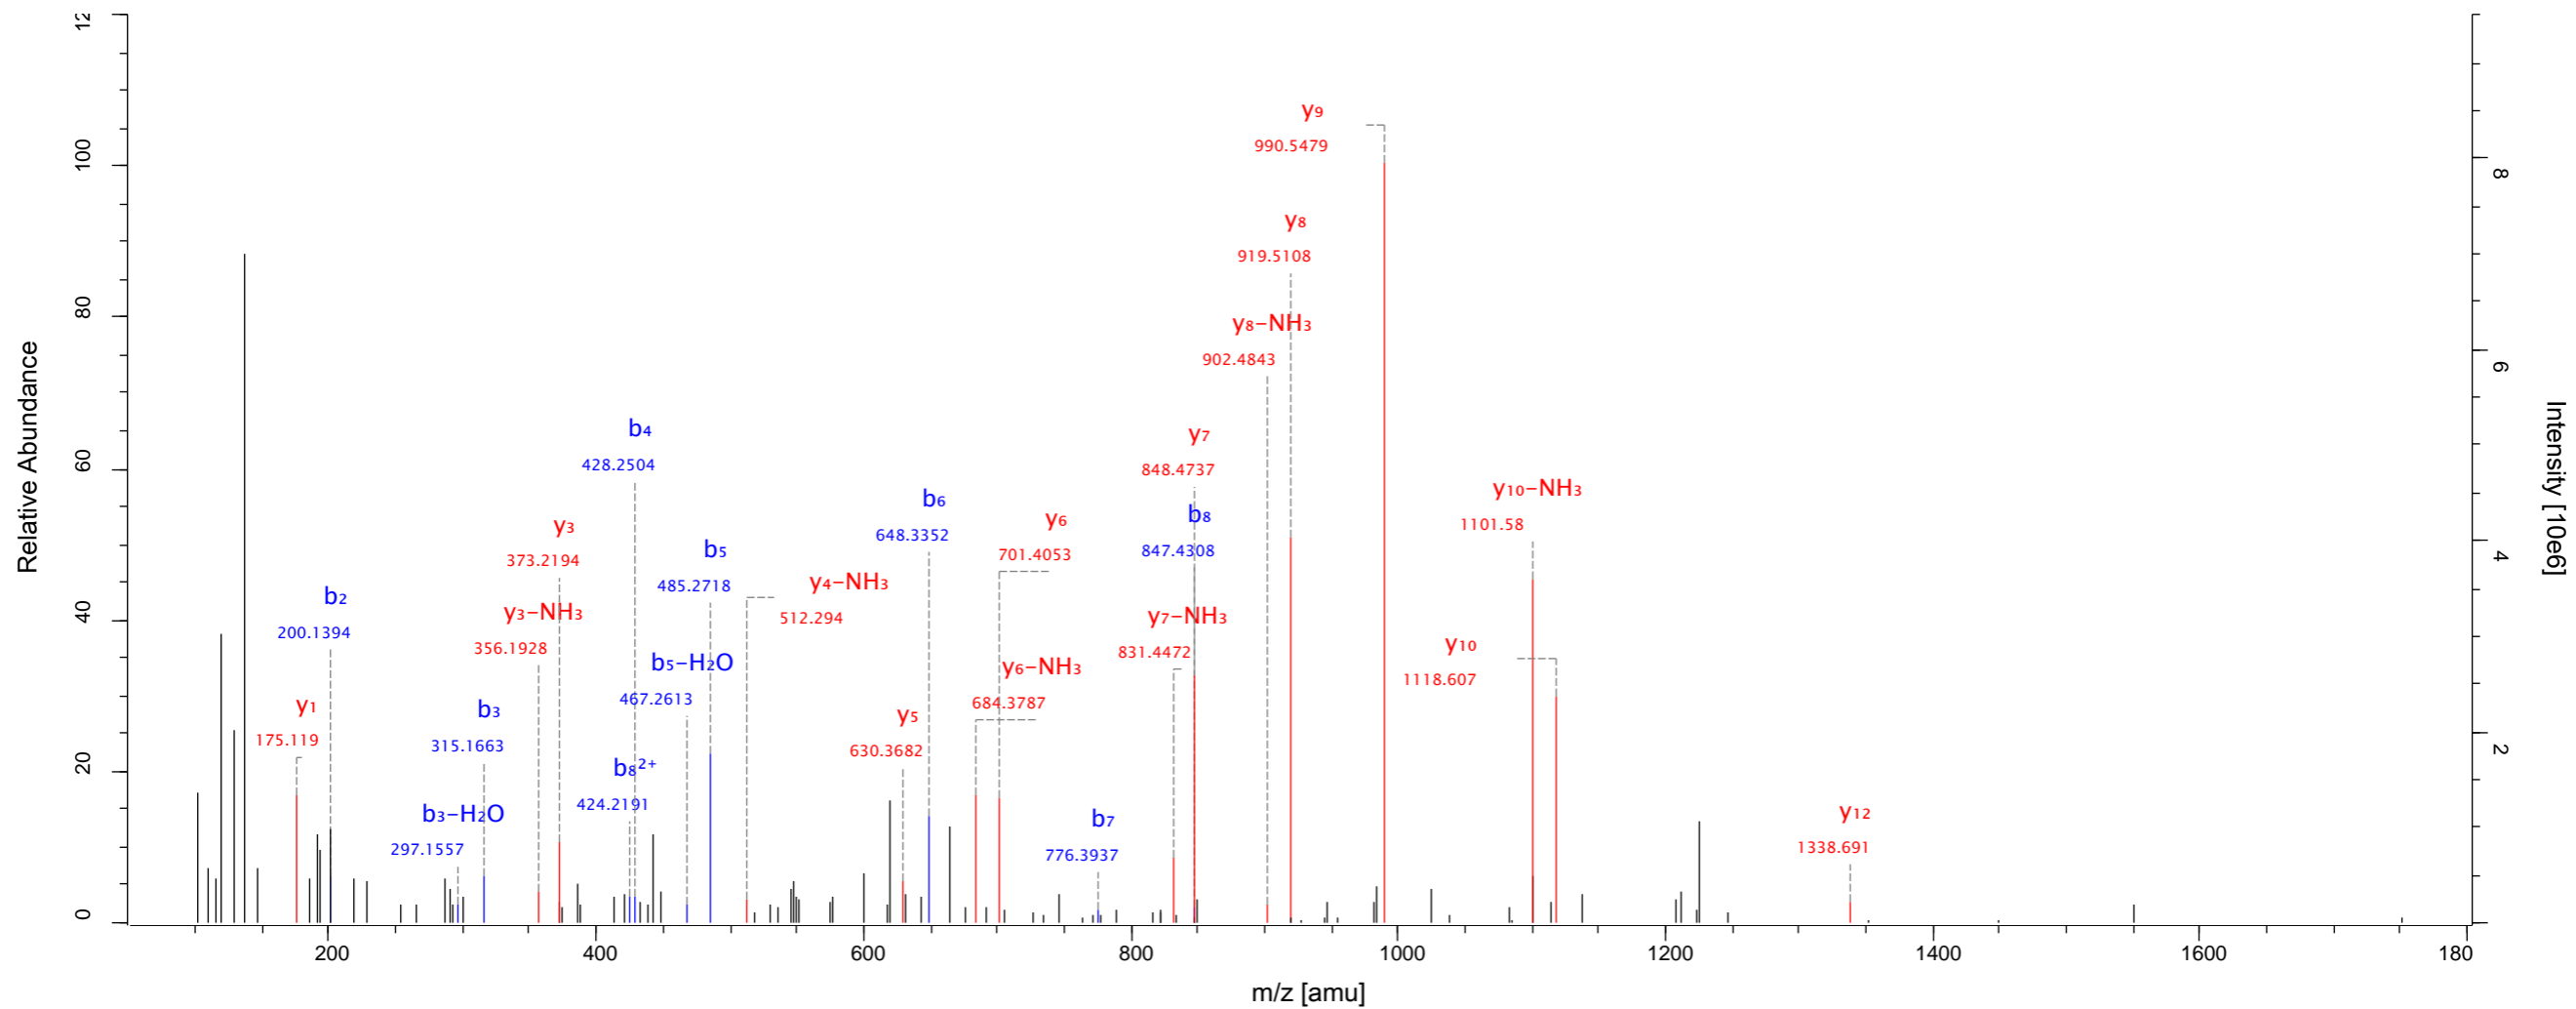

Raw file: 20111212\_EXQ5\_AnMi\_QC\_HCMVp11\_12  
Scan number: 24065  
Protein: ORFL114W + NC\_006273.2[60151,60708]+ <unknown description>  
Peptide score: 107.66  
Method: FTMS; HCD

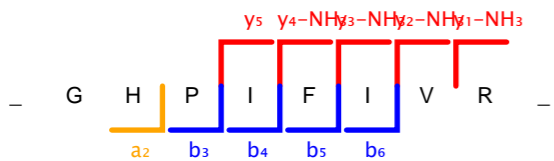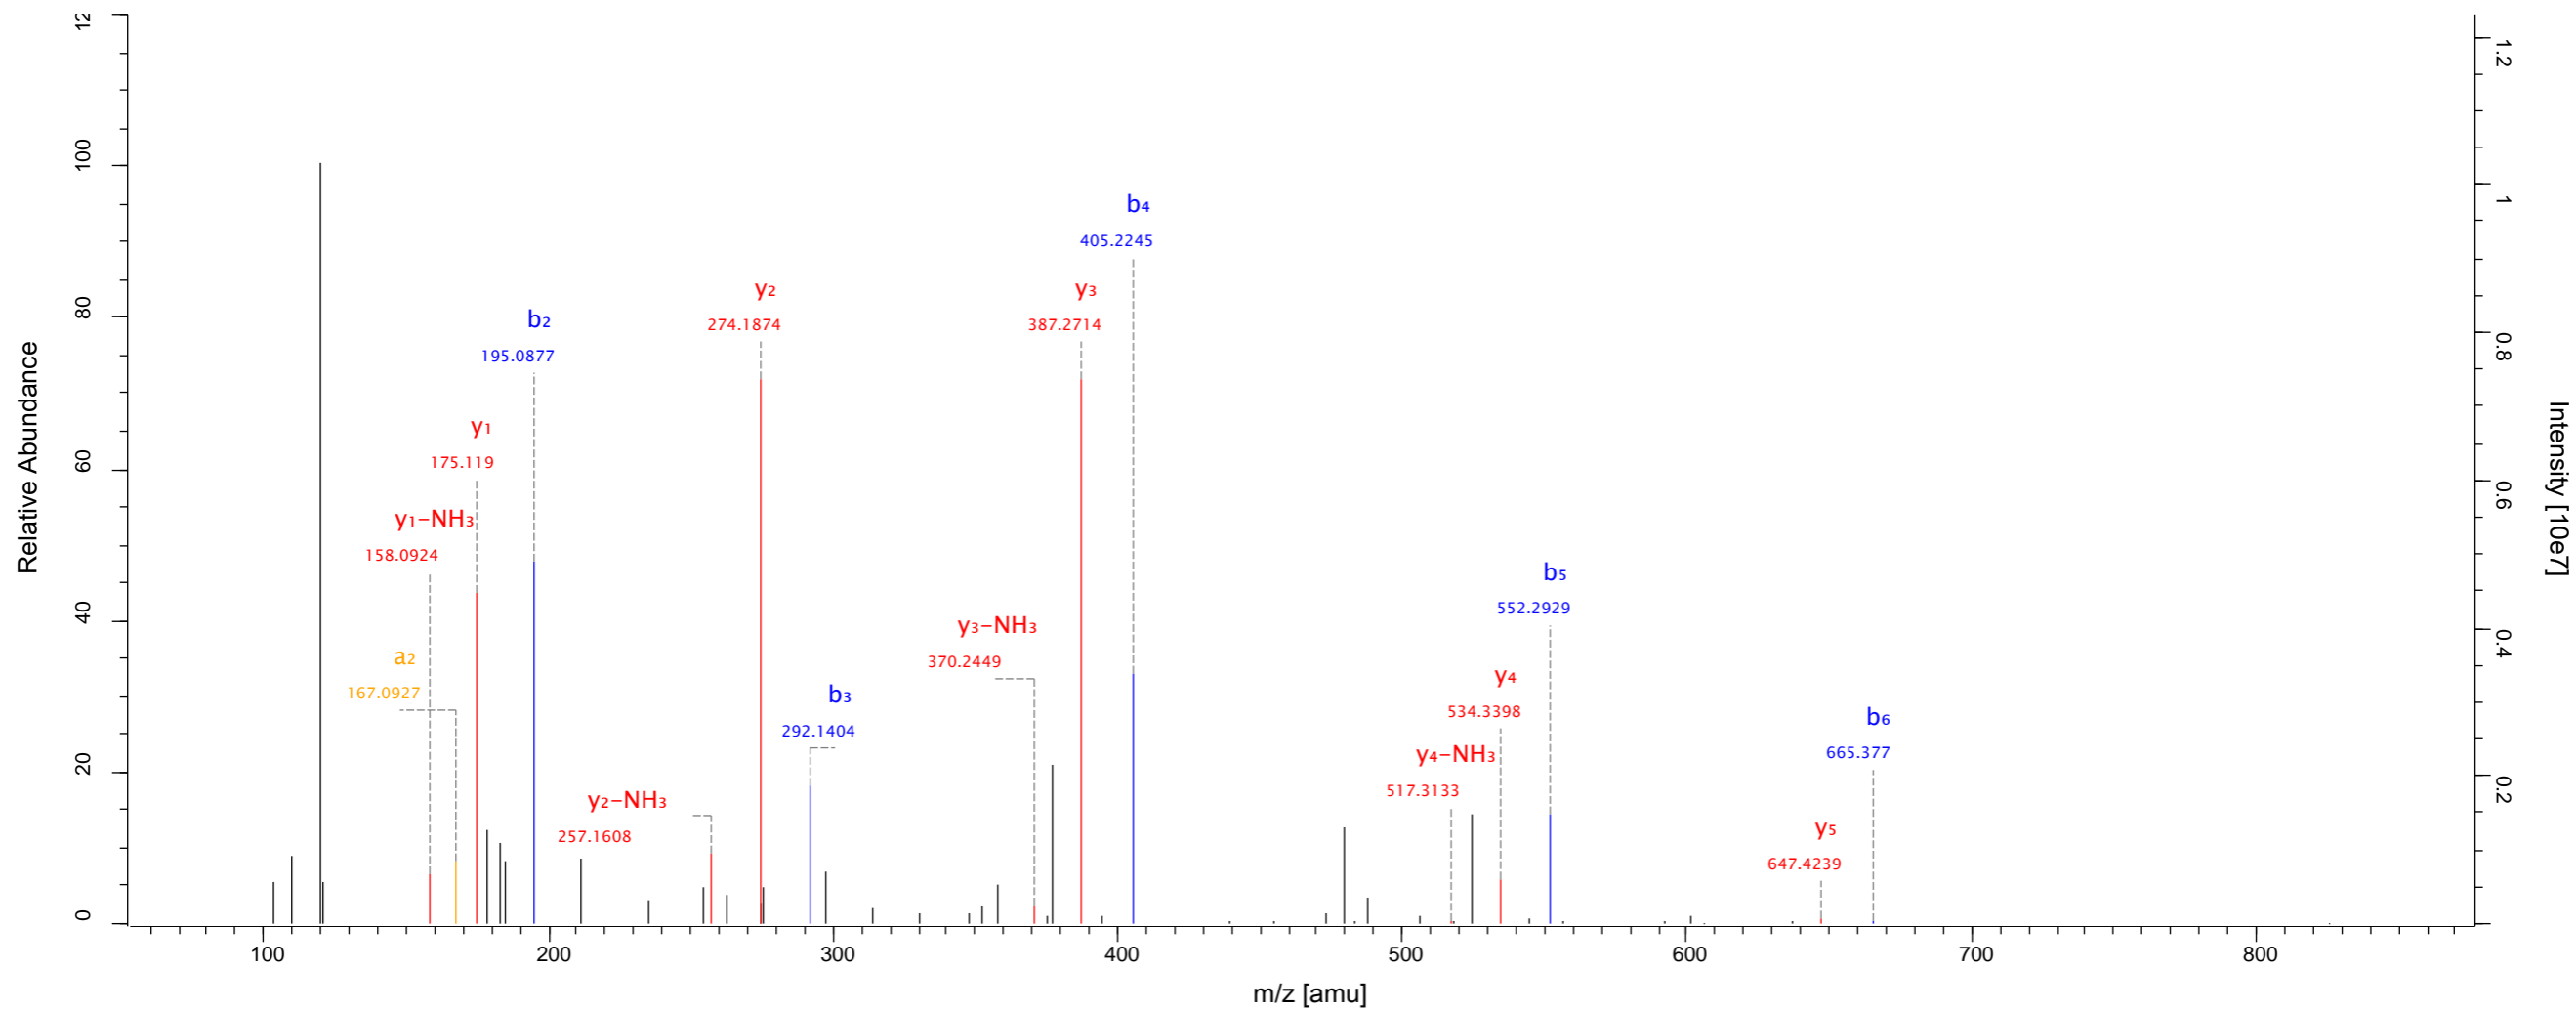

Raw file: 20111212\_EXQ5\_AnMi\_QC\_HCMVp11\_12  
 Scan number: 42505  
 Protein: ORFL299W + NC\_006273.2[185047,185685]+ <unknown description>  
 Peptide score: 133.05  
 Method: FTMS; HCD

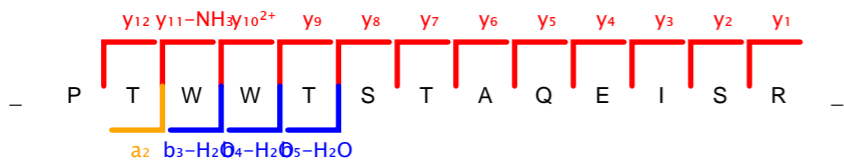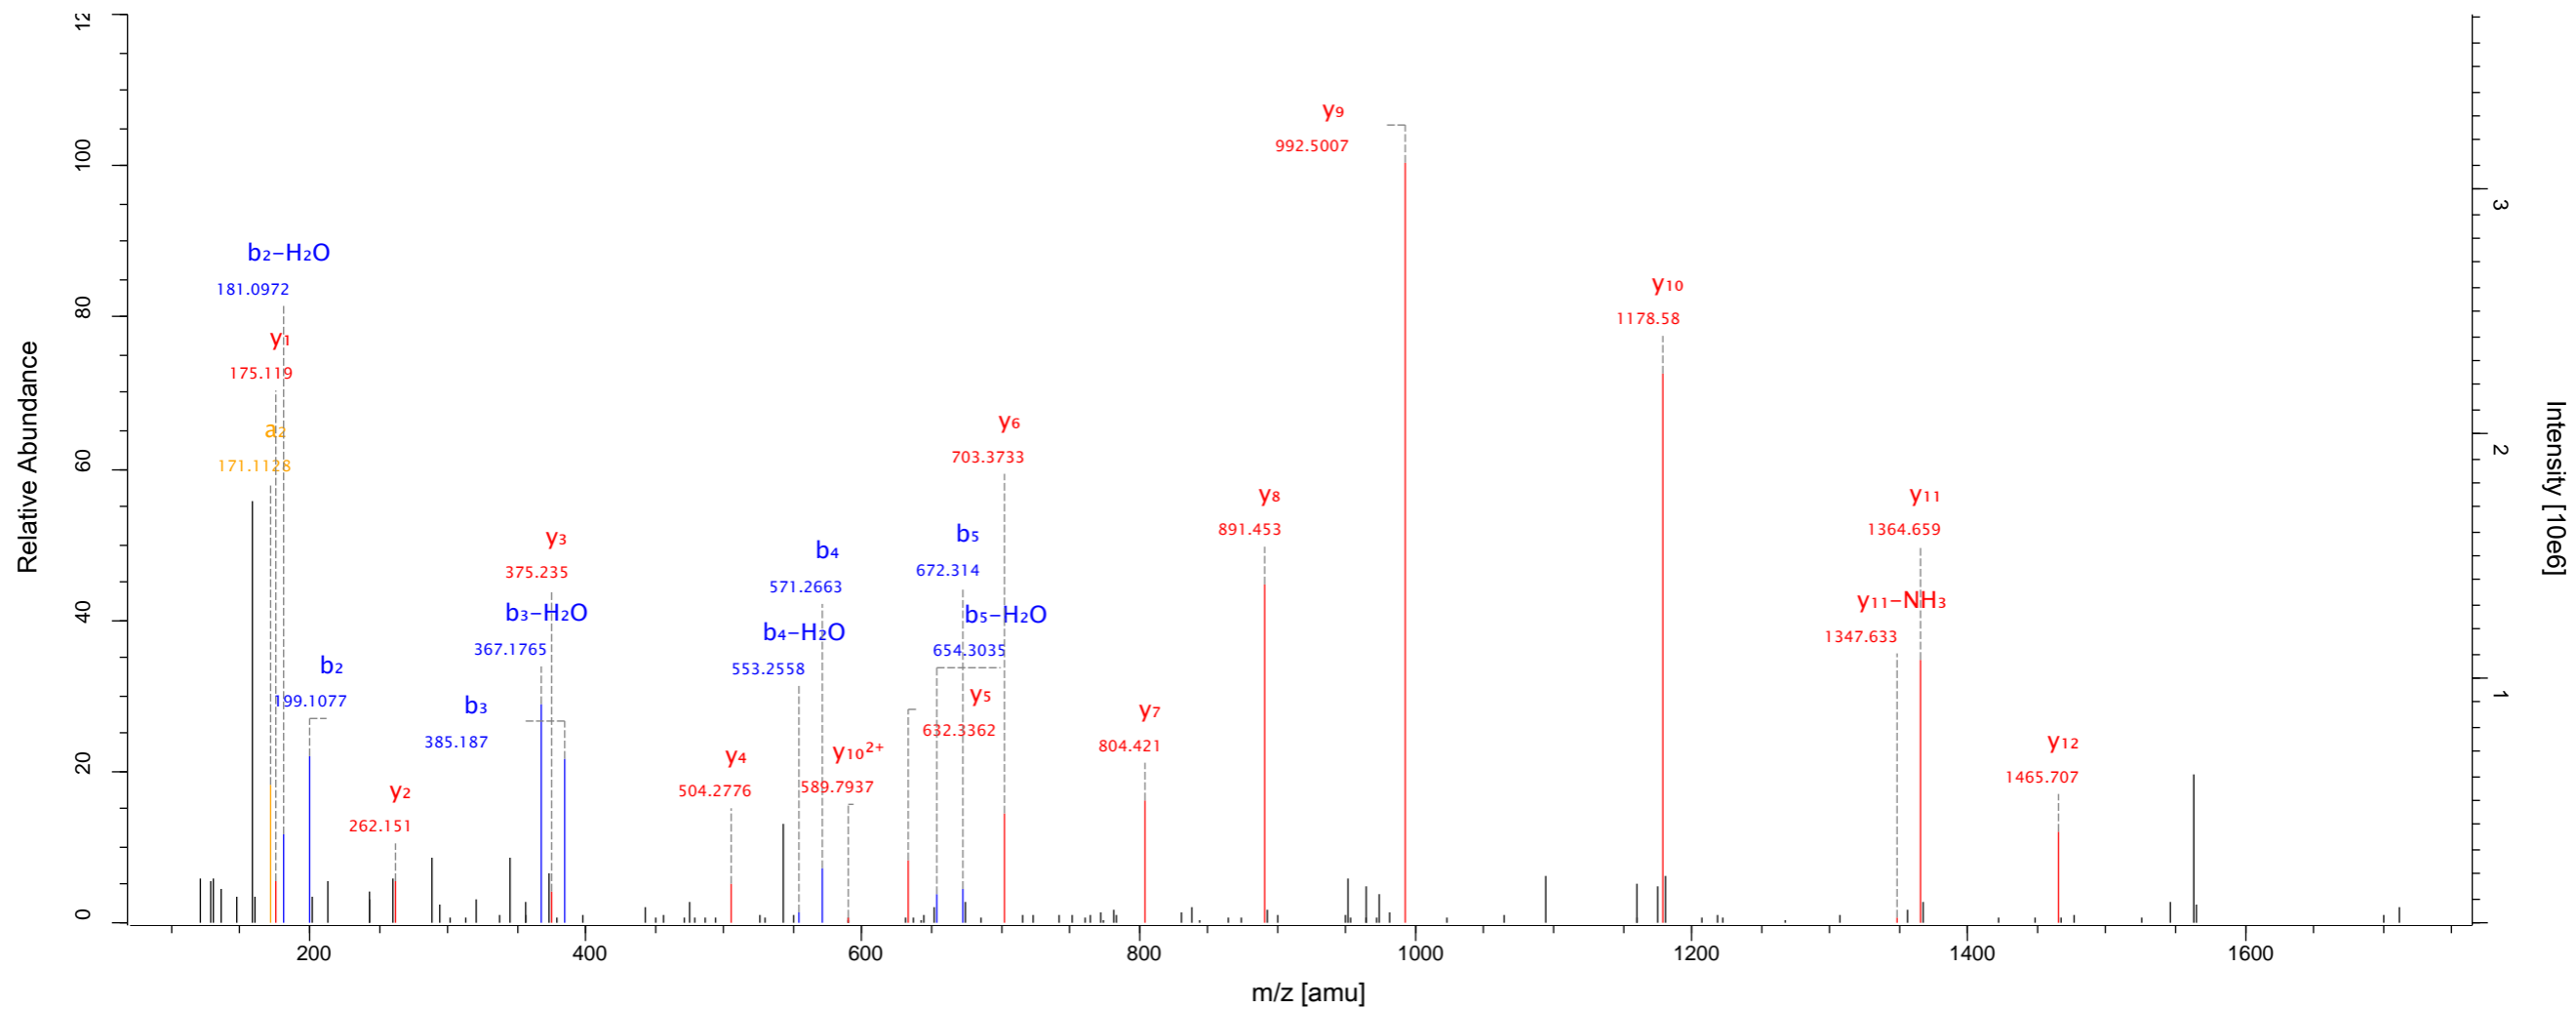

Raw file: 20111212\_EXQ5\_AnMi\_QC\_HCMVp1\_12  
 Scan number: 46474  
 Protein: ORFL82W + NC\_006273.2[36796,37488]+ <unknown description>  
 Peptide score: 174.74  
 Method: FTMS; HCD

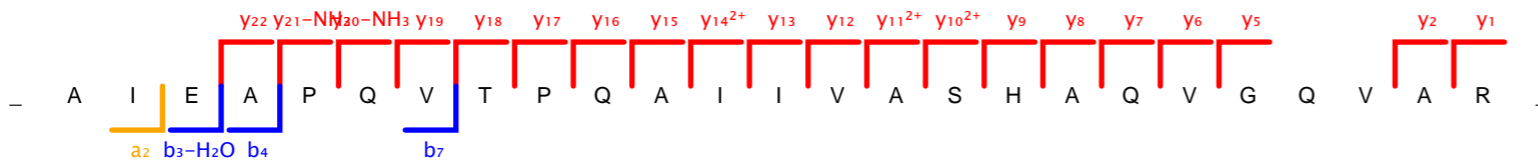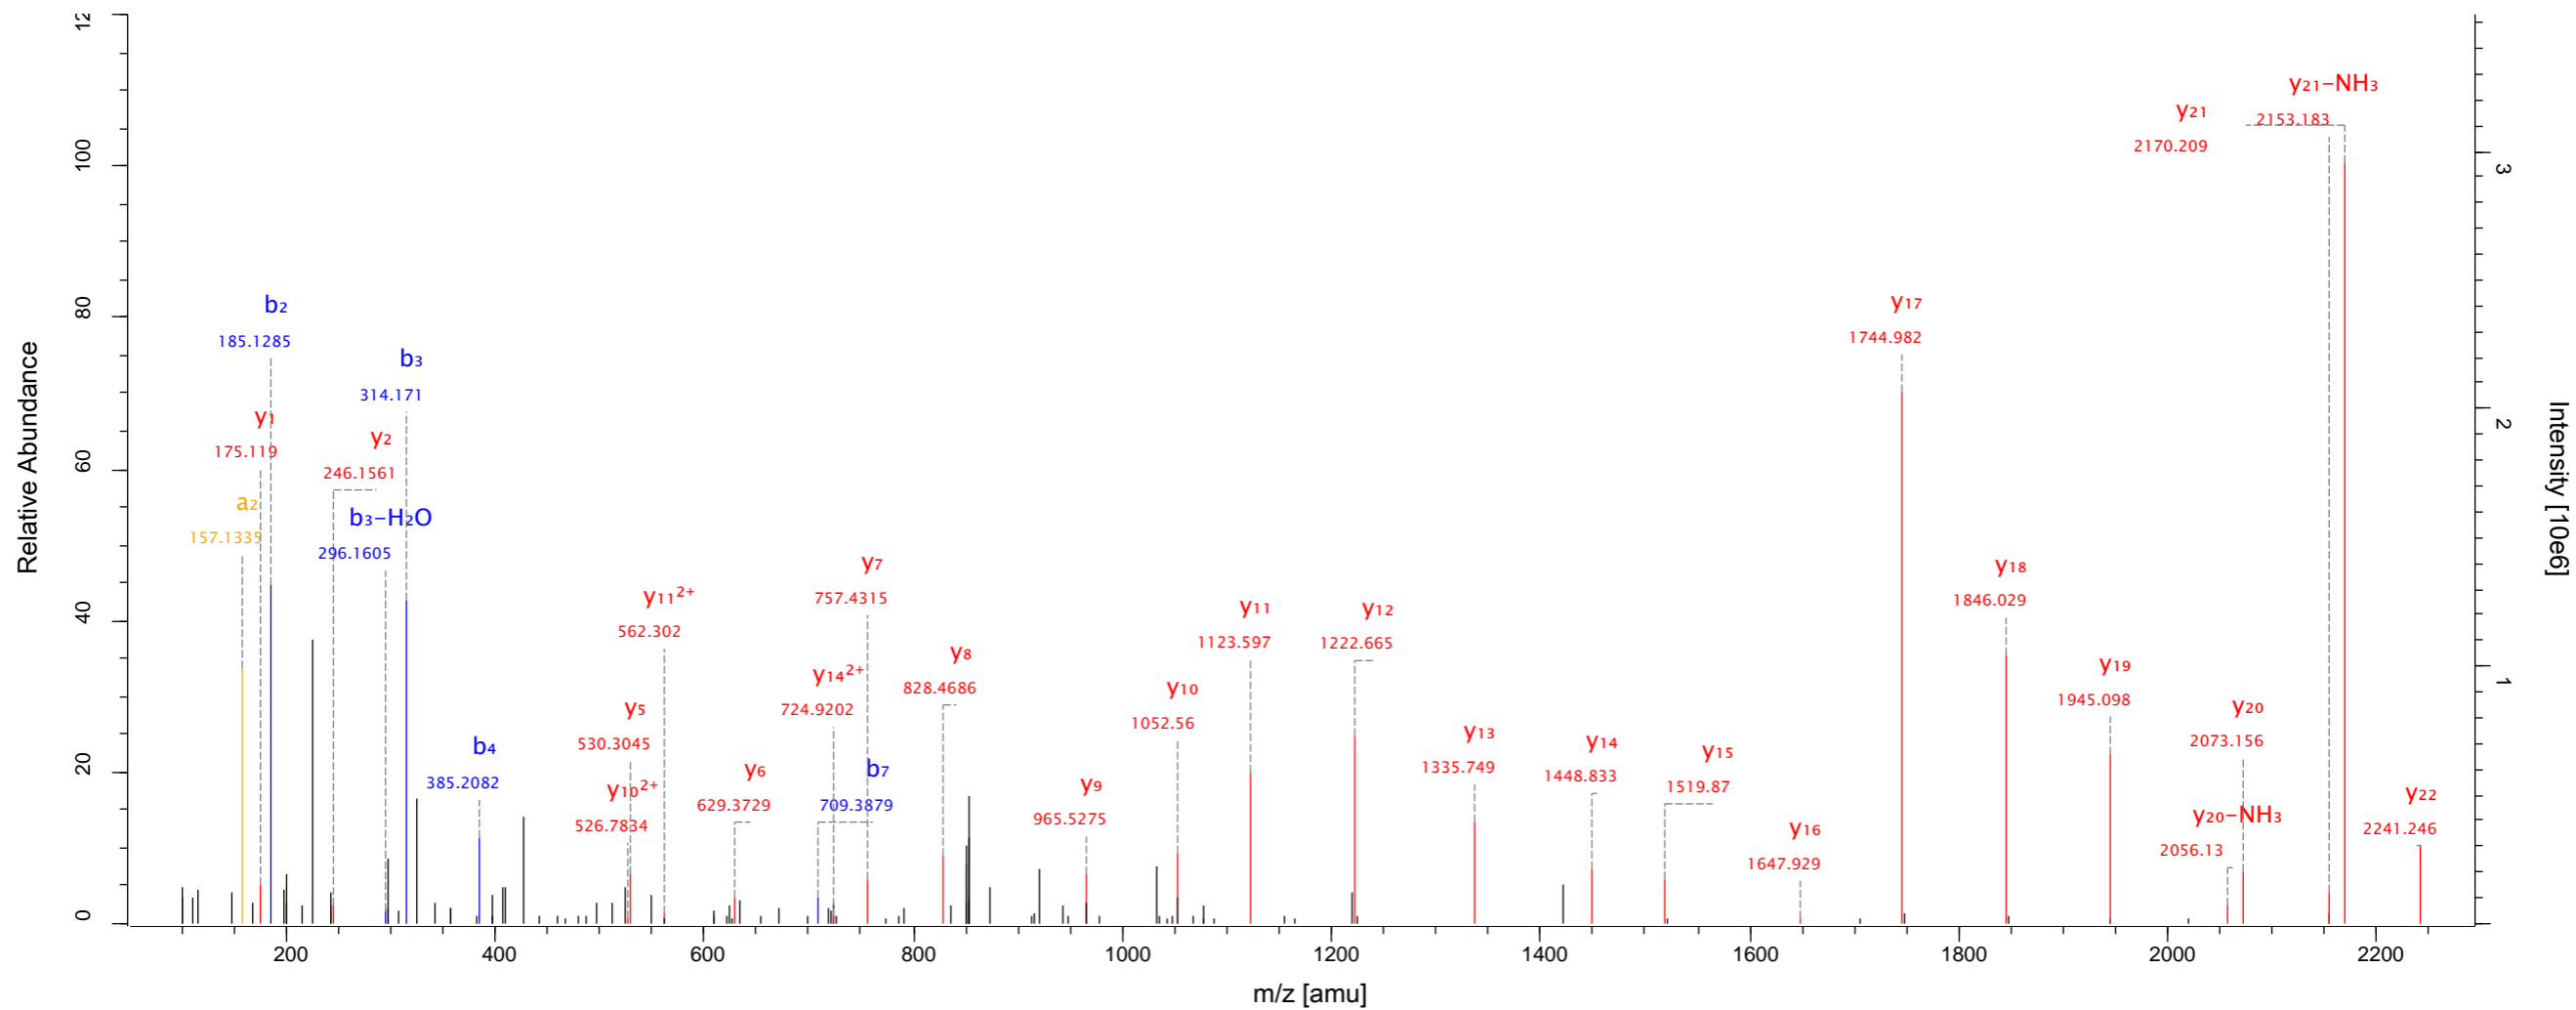

Raw file: 20111212\_EXQ5\_AnMi\_QC\_HCMVp1\_12  
Scan number: 50028  
Protein: ORFL299W + NC\_006273.2[185047,185685]+ <unknown description>  
Peptide score: 159.31  
Method: FTMS; HCD

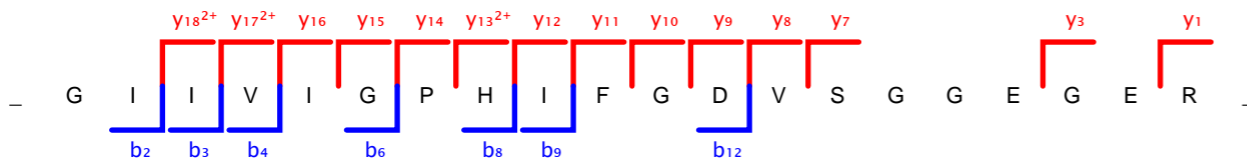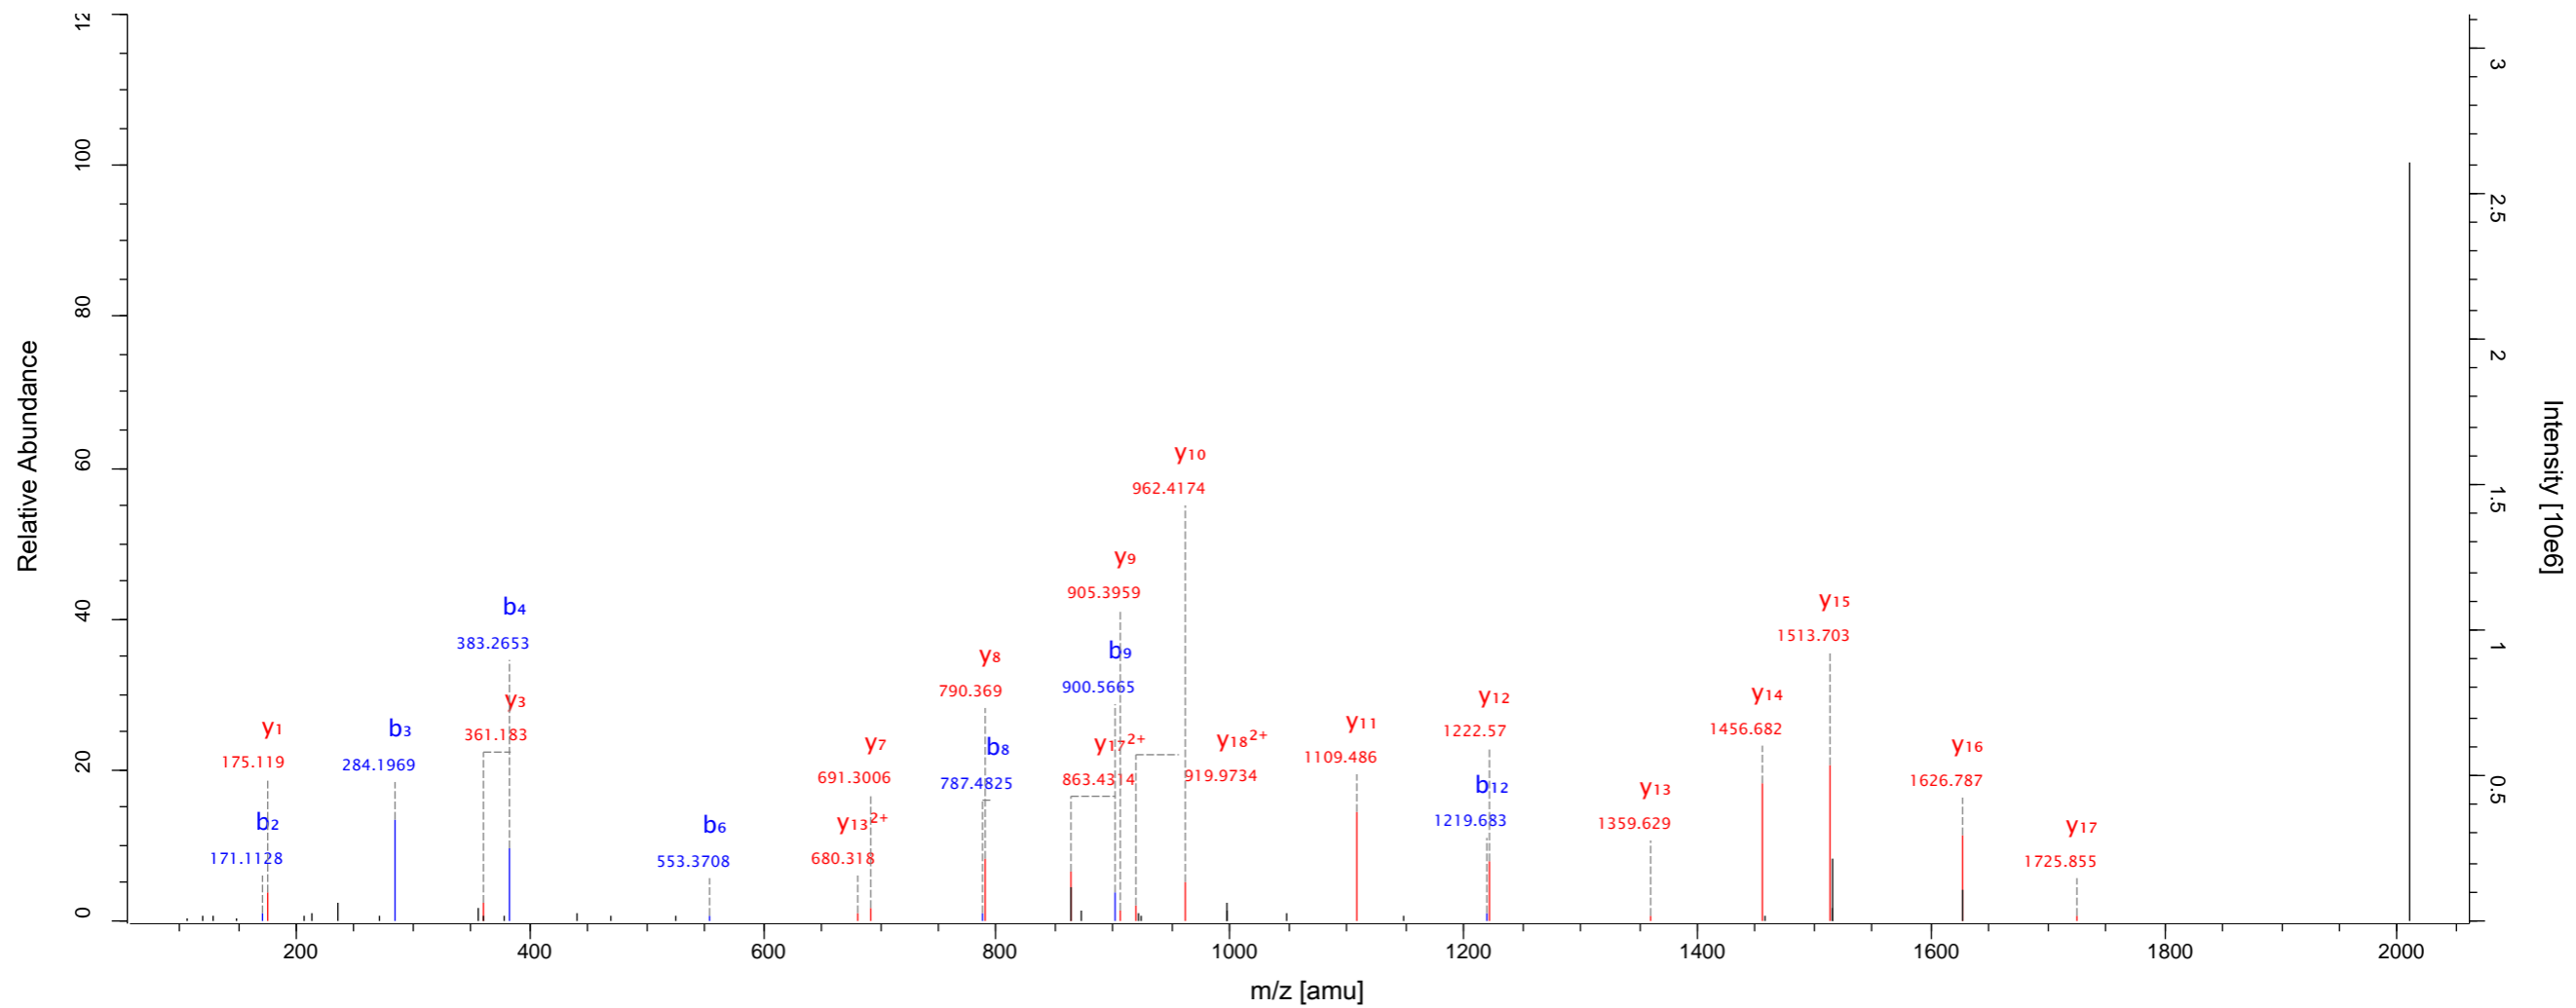



Raw file: 20111212\_EXQ5\_AnMi\_QC\_HCMVp1\_12  
Scan number: 52281  
Protein: ORFL174C.iORF1 - NC\_006273.2[106302,106568]- <unknown description>  
Peptide score: 87.18  
Method: FTMS; HCD

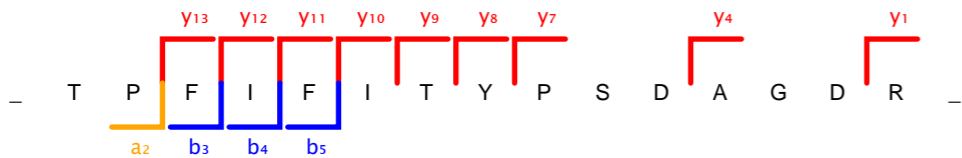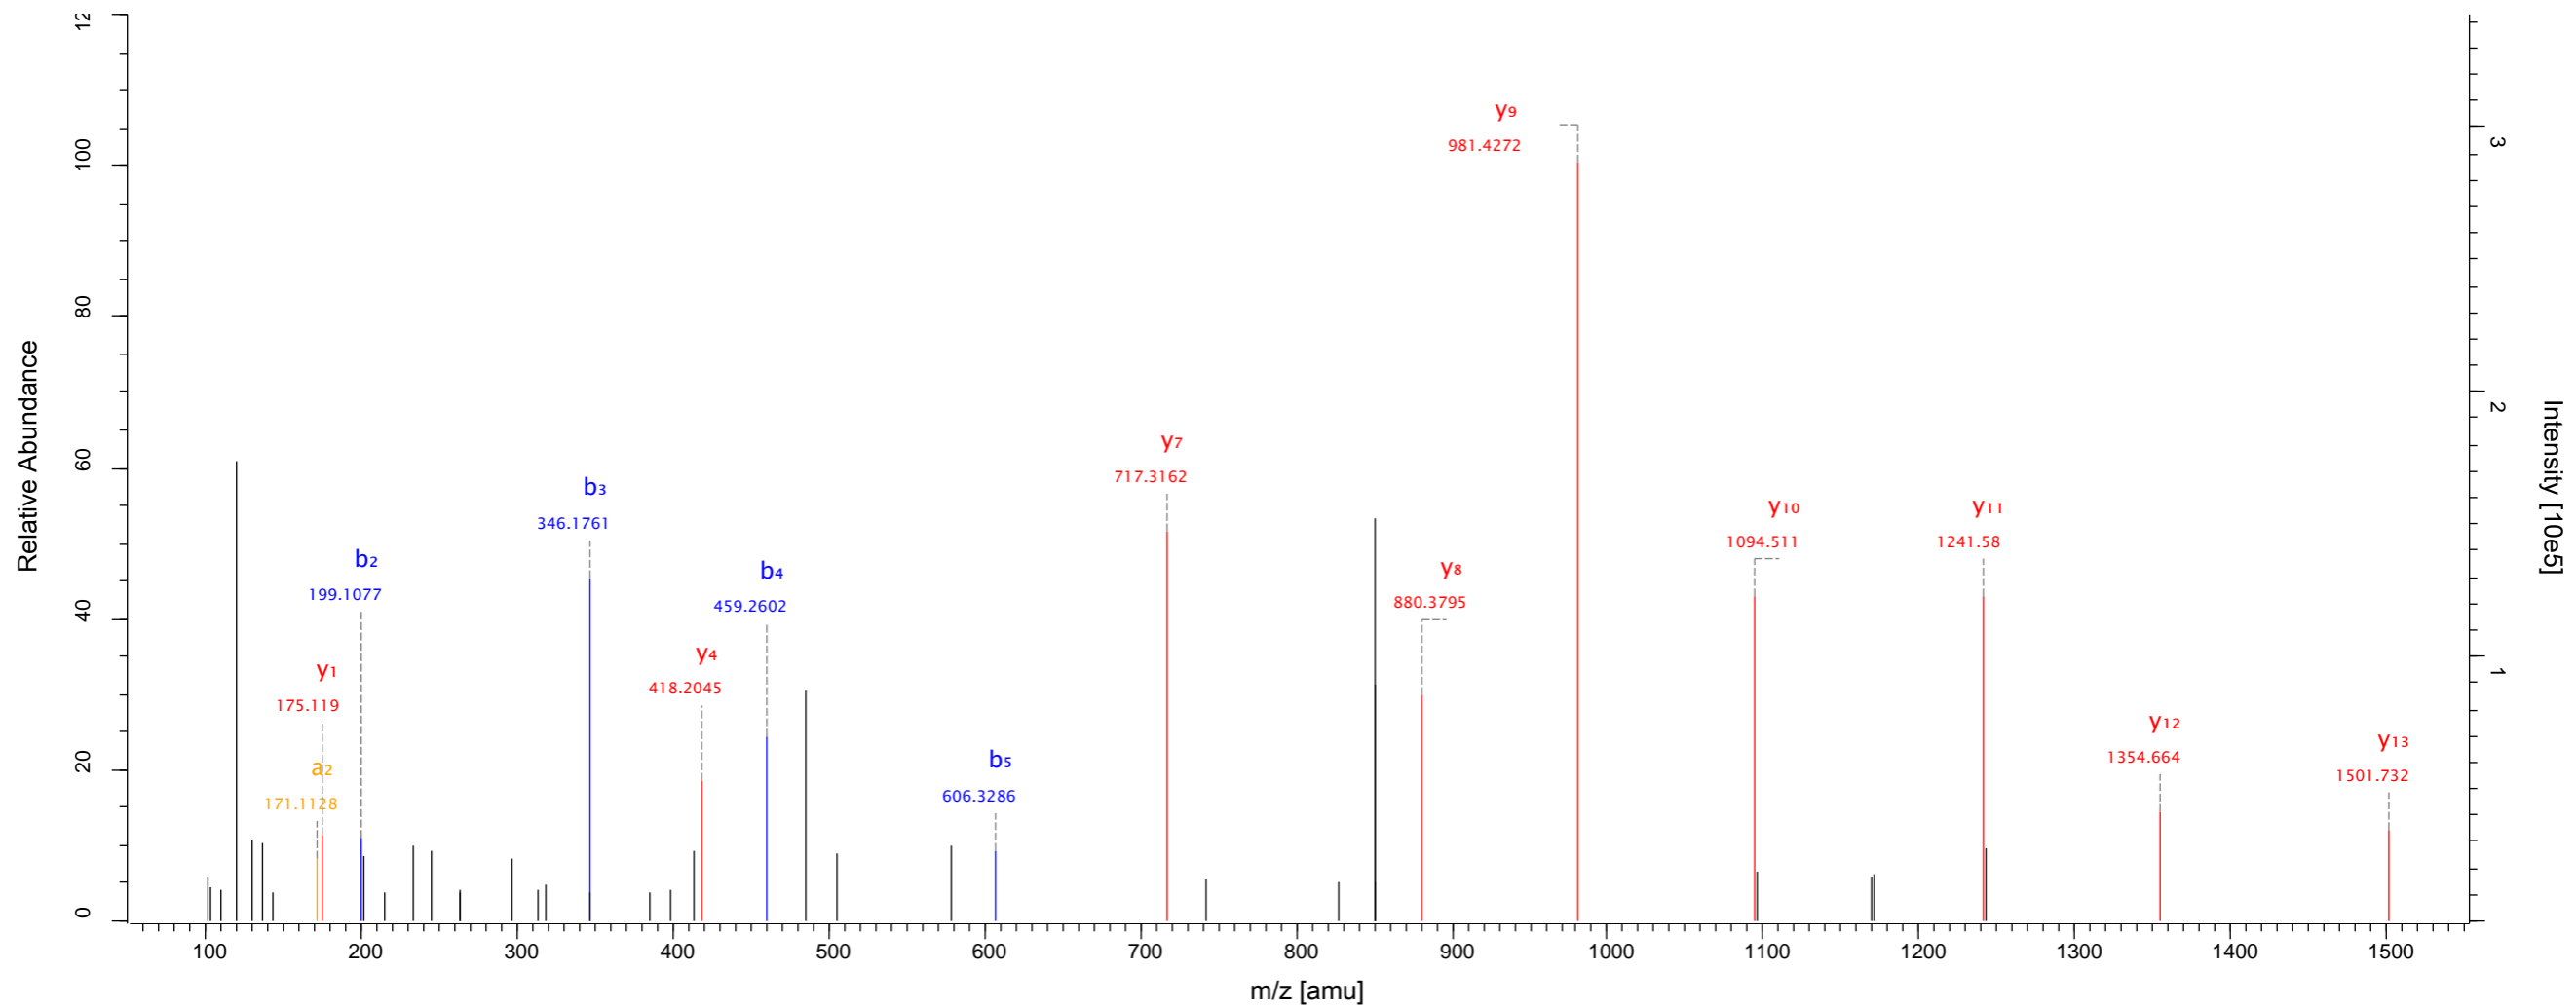

Raw file: 20111212\_EXQ5\_AnMi\_QC\_HCMVp11\_12  
Scan number: 53234  
Protein: ORFL82W + NC\_006273.2[36796,37488]+ <unknown description>  
Peptide score: 52.48  
Method: FTMS; HCD

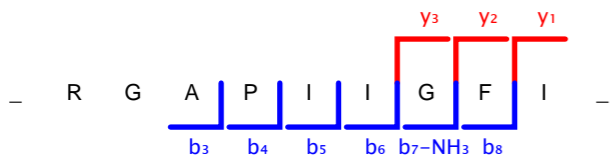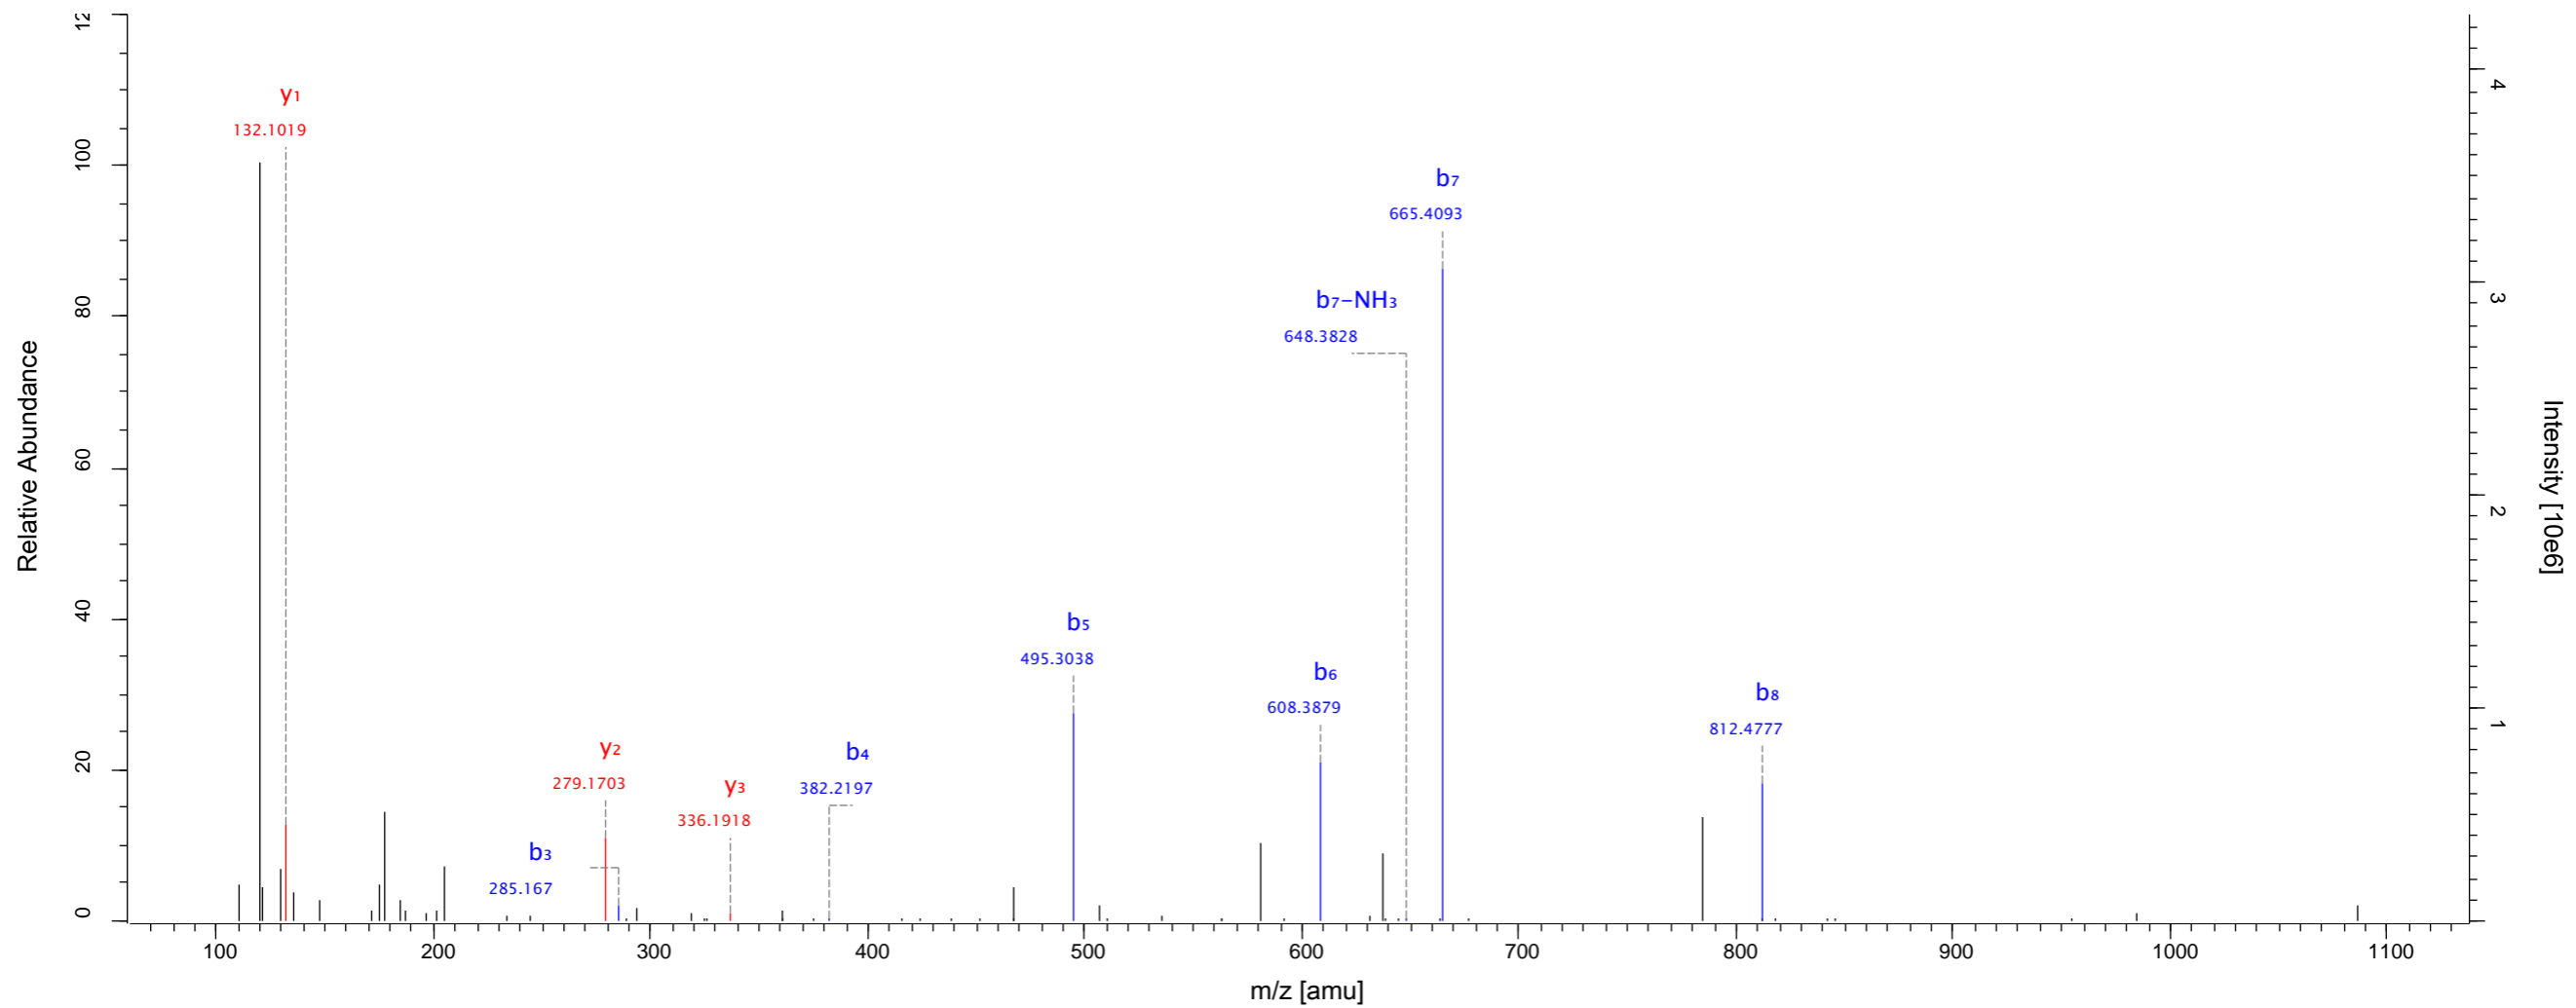

Raw file: 20111212\_EXQ5\_AnMi\_QC\_HCMVp11\_13

Scan number: 10425

Protein: ORFL321W + NC\_006273.2[191968,194126]+ <unknown description>; ORFL321W.iORF1 + NC\_006273.2[191968,194126]+ <unknown description>; ORFL321W.iORF4 + NC\_006273.2[193200,194126]+ <unknown description>

Peptide score: 80.24

Method: FTMS; HCD

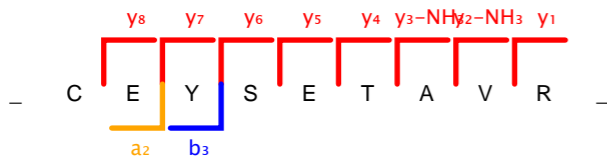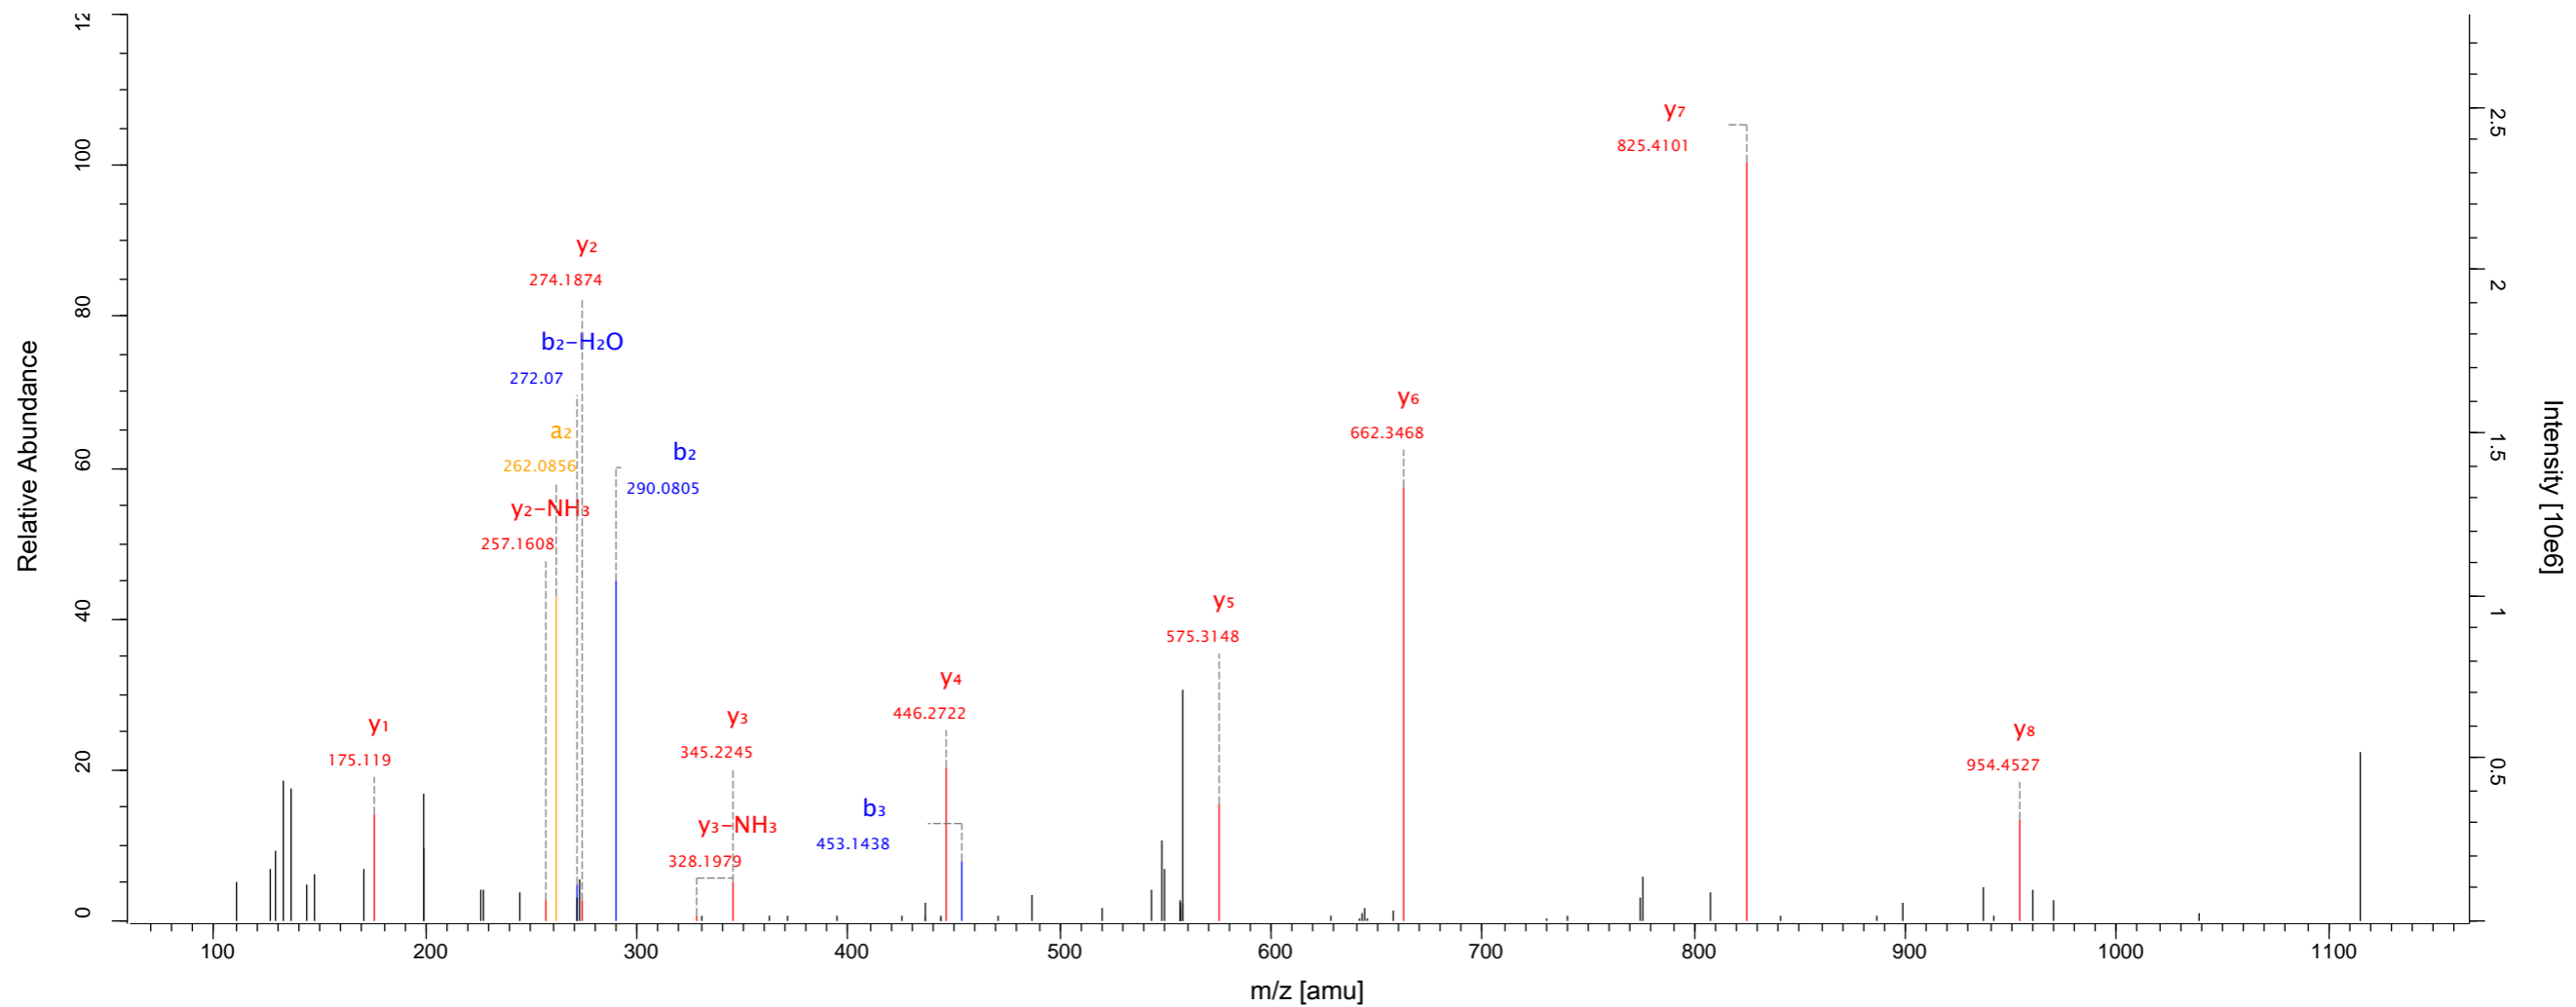

Raw file: 20111212\_EXQ5\_AnMi\_QC\_HCMVp11\_13  
 Scan number: 11022  
 Protein: ORFL147C - NC\_006273.2[85932,87362]- <unknown description>  
 Peptide score: 164.64  
 Method: FTMS; HCD

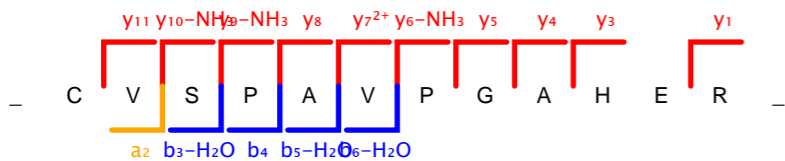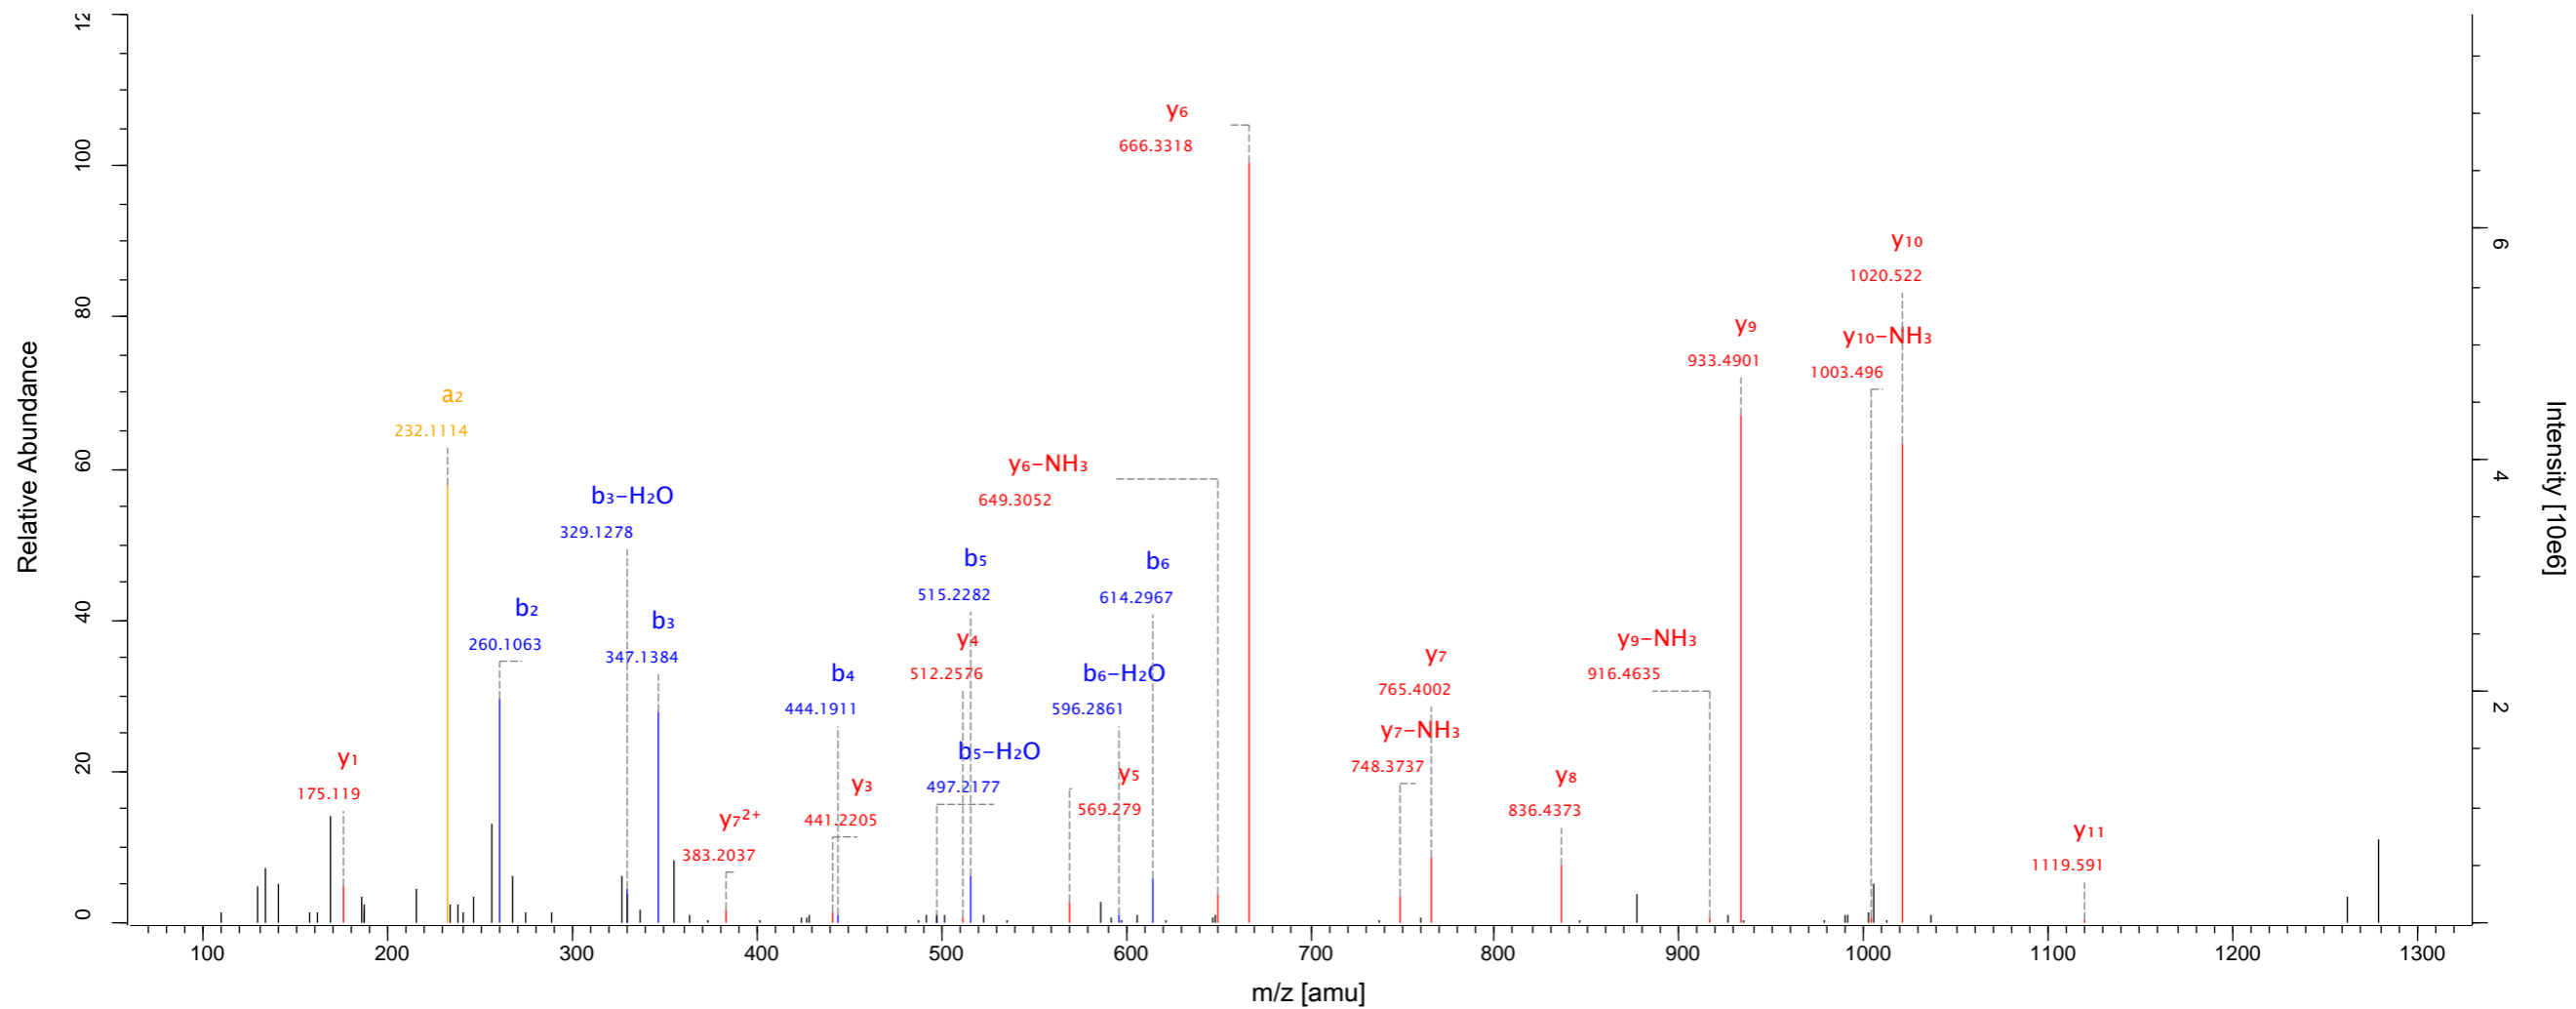

Raw file: 20111212\_EXQ5\_AnMi\_QC\_HCMVp1\_13  
Scan number: 15298  
Protein: ORFL147C - NC\_006273.2[85932,87362]- <unknown description>  
Peptide score: 100.45  
Method: FTMS; HCD

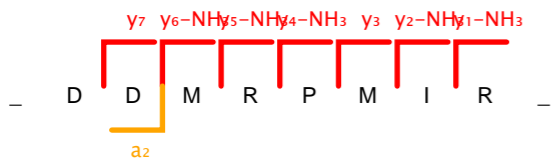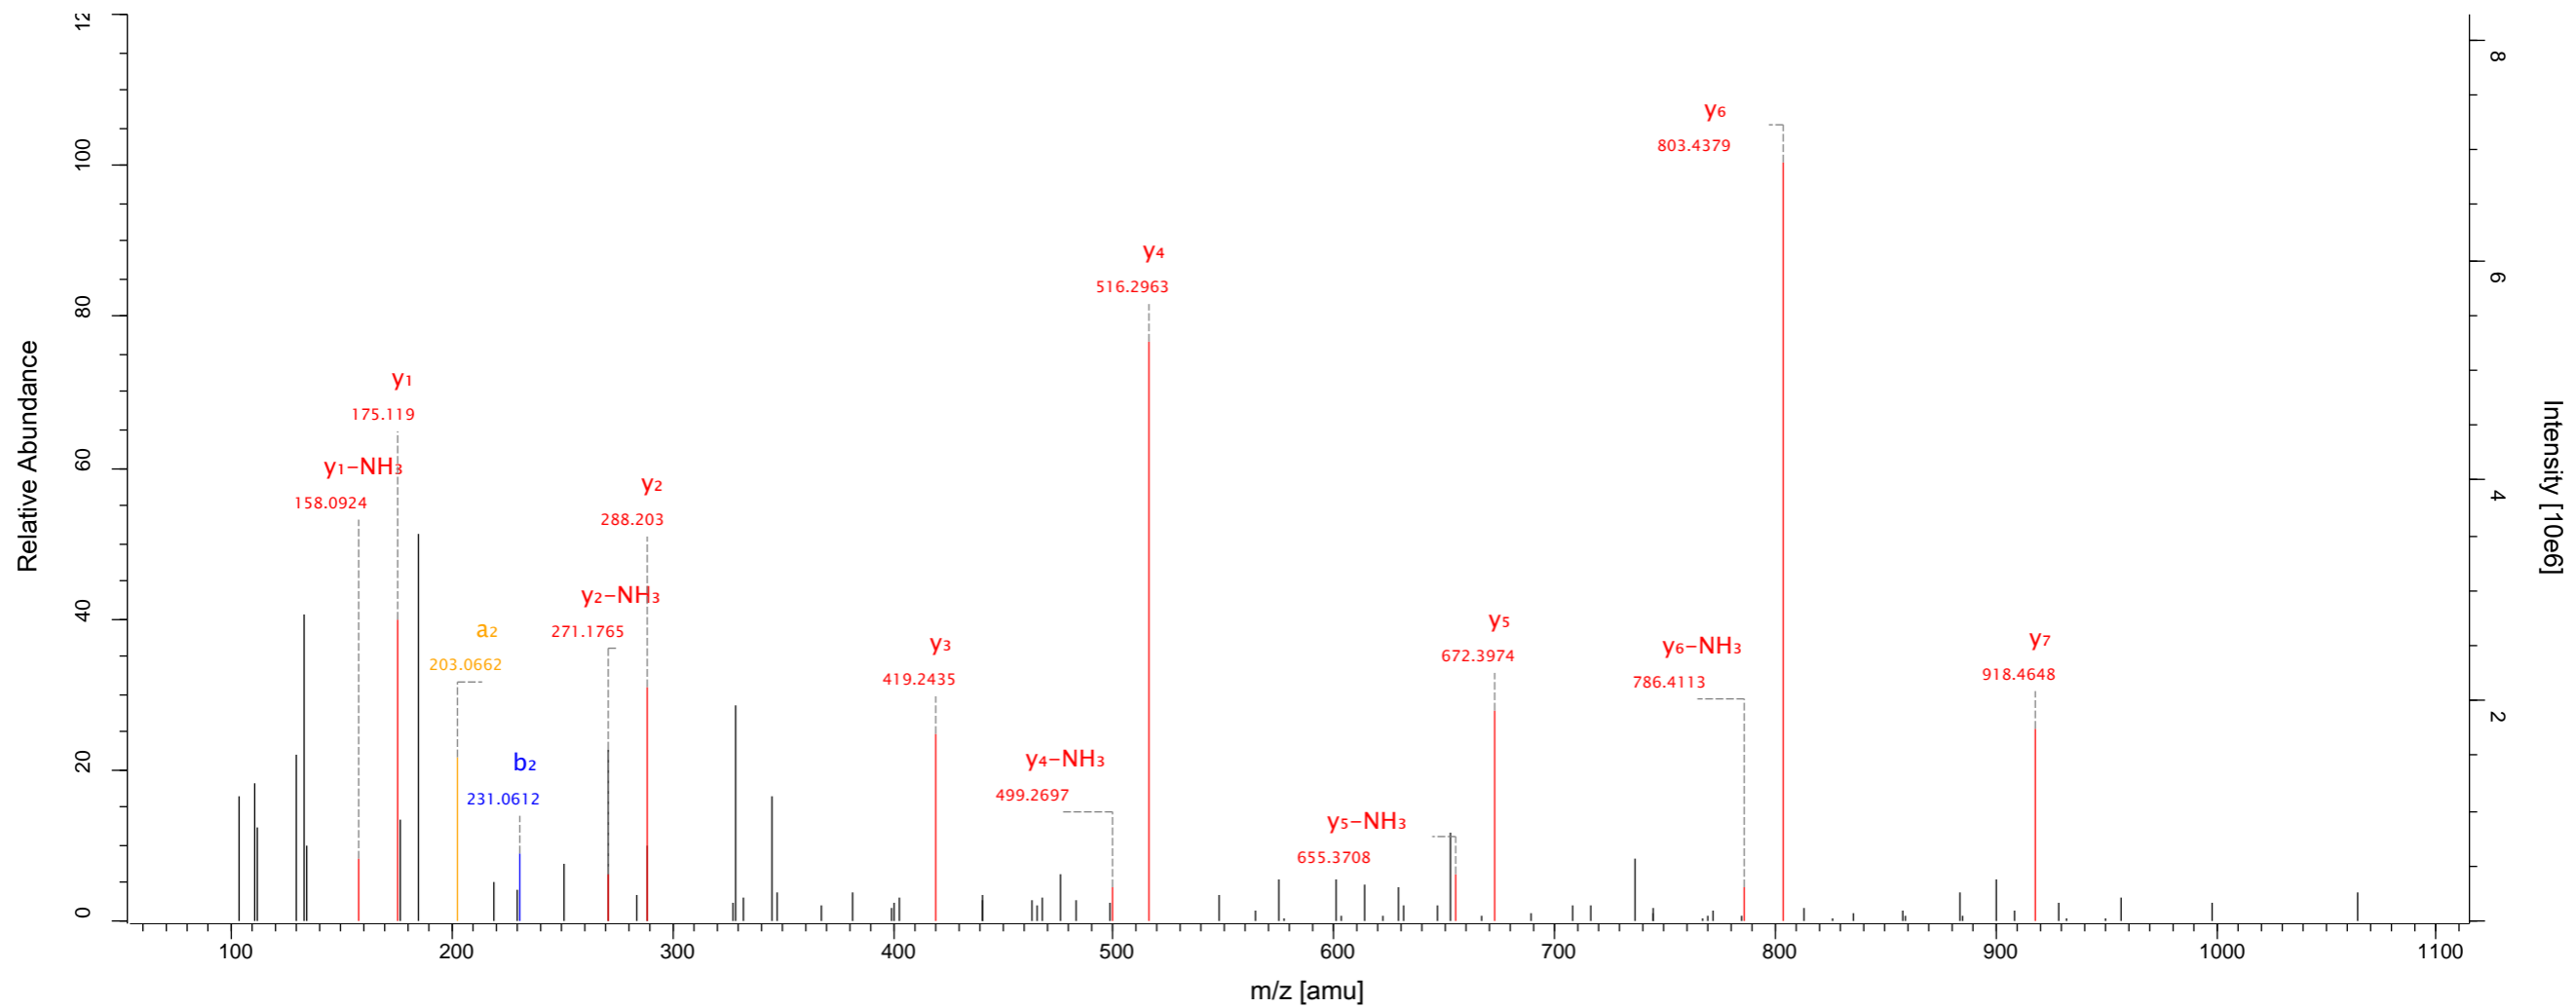

Raw file: 20111212\_EXQ5\_AnMi\_QC\_HCMVp1\_13

Scan number: 18294

Protein: ORFL321W + NC\_006273.2[191968,194126]+ <unknown description>; ORFL321W.iORF1 + NC\_006273.2[191968,194126]+ <unknown description>; ORFL321W.iORF4 + NC\_006273.2[193200,194126]+ <unknown description>

Peptide score: 199.56

Method: FTMS; HCD

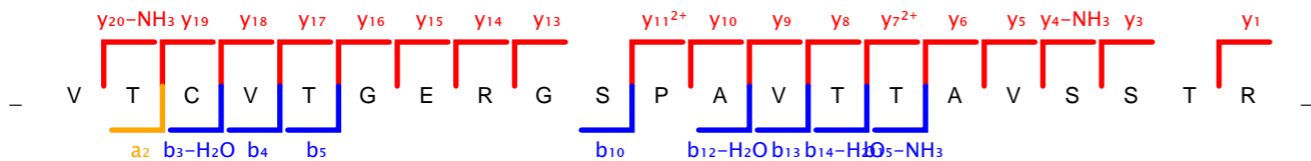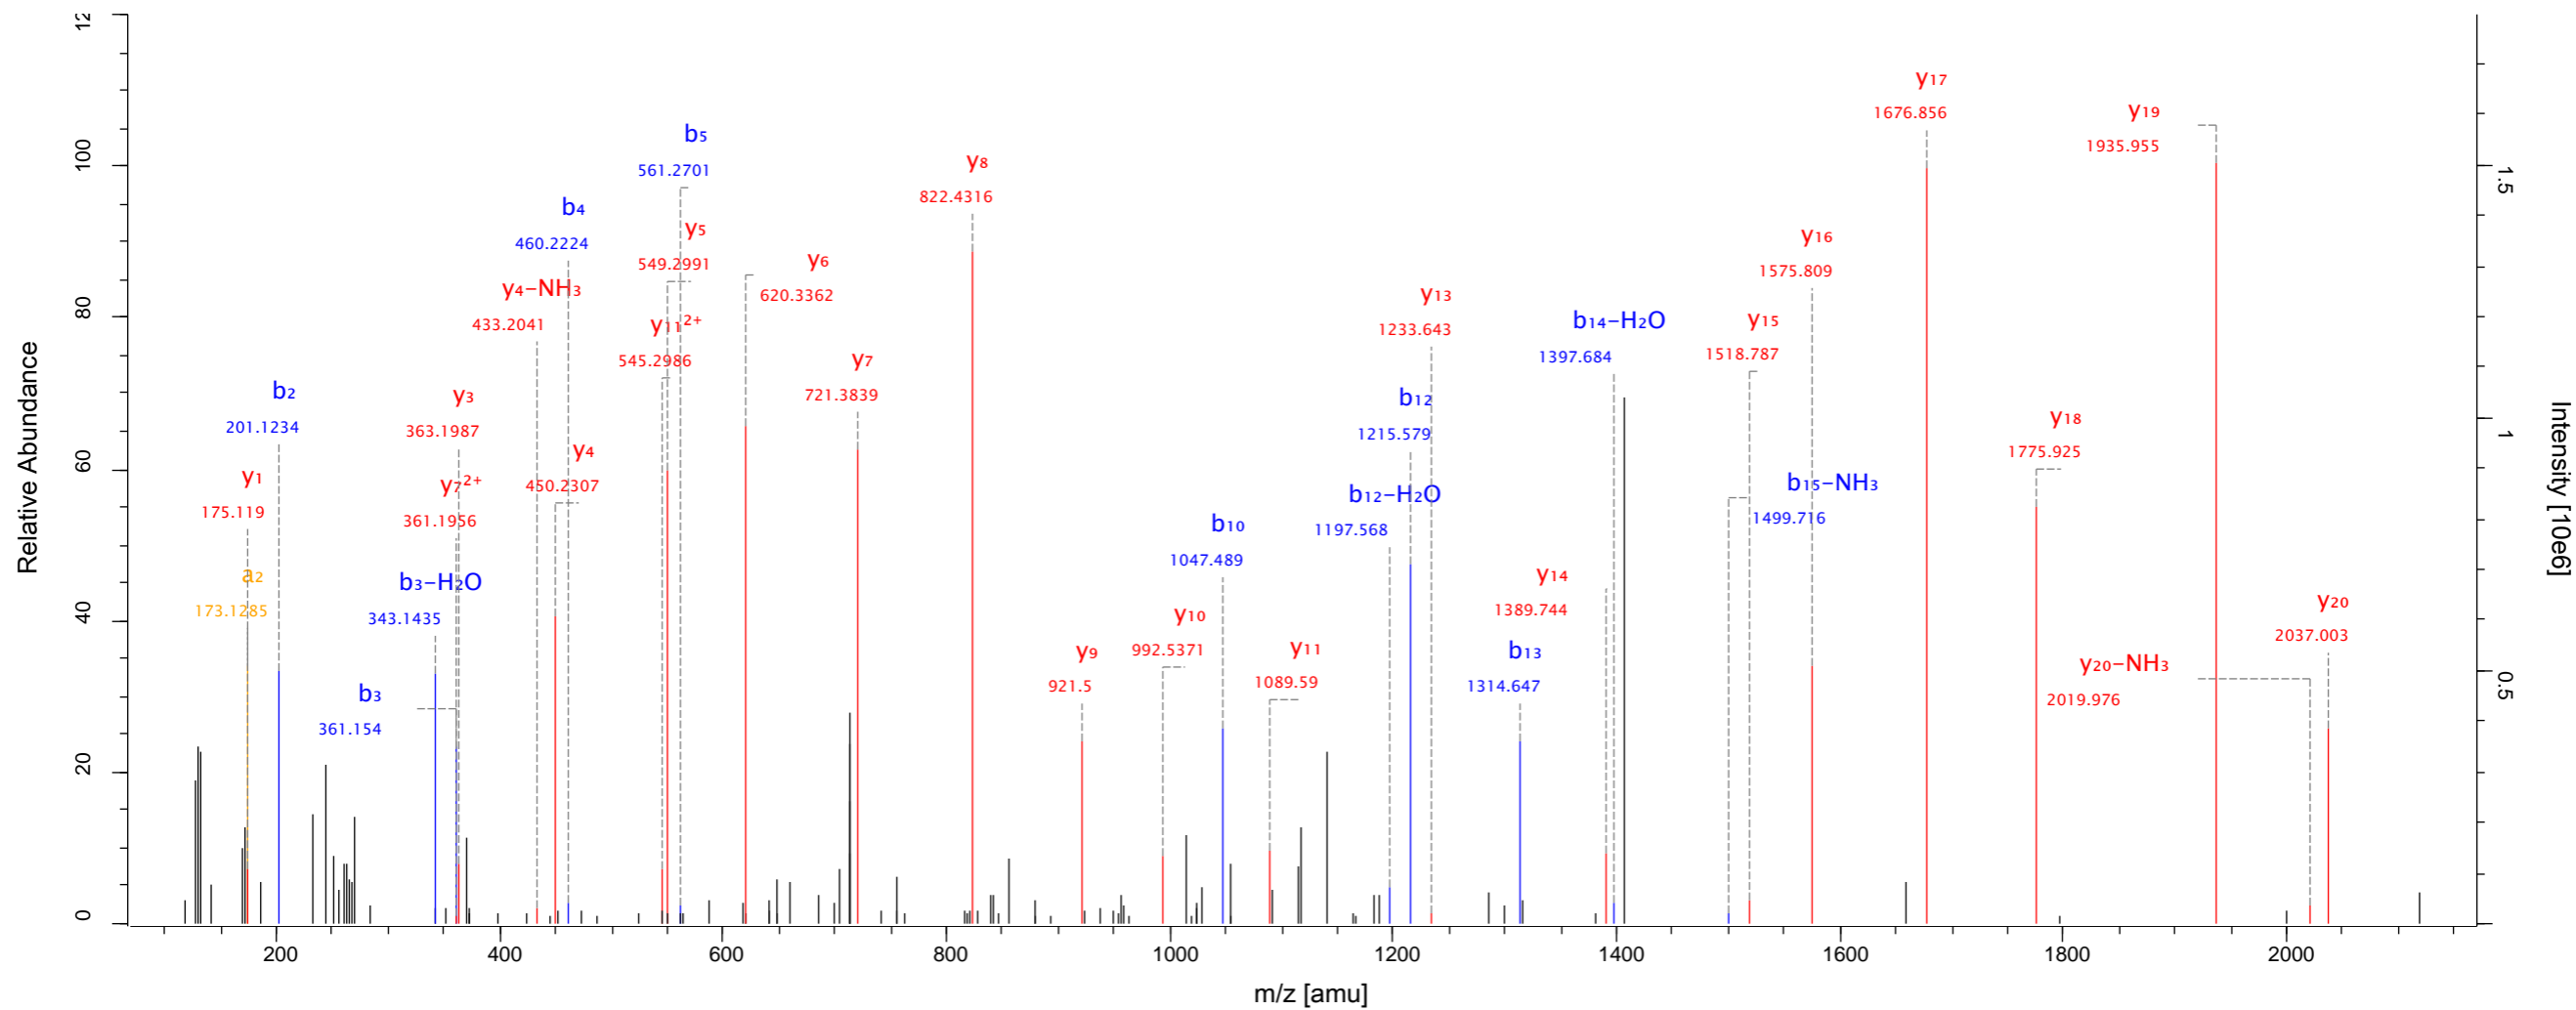

Raw file: 20111212\_EXQ5\_AnMi\_QC\_HCMVp1\_13

Scan number: 23271

Protein: ORFL321W + NC\_006273.2[191968,194126]+ <unknown description>; ORFL321W.iORF1 + NC\_006273.2[191968,194126]+ <unknown description>; ORFL321W.iORF4 + NC\_006273.2[193200,194126]+ <unknown description>

Peptide score: 346.34

Method: FTMS; HCD

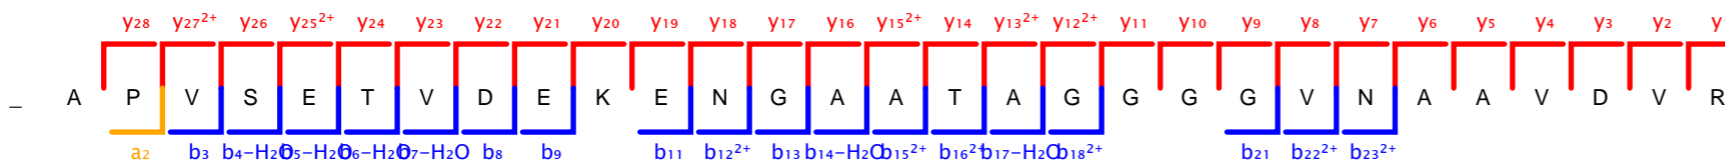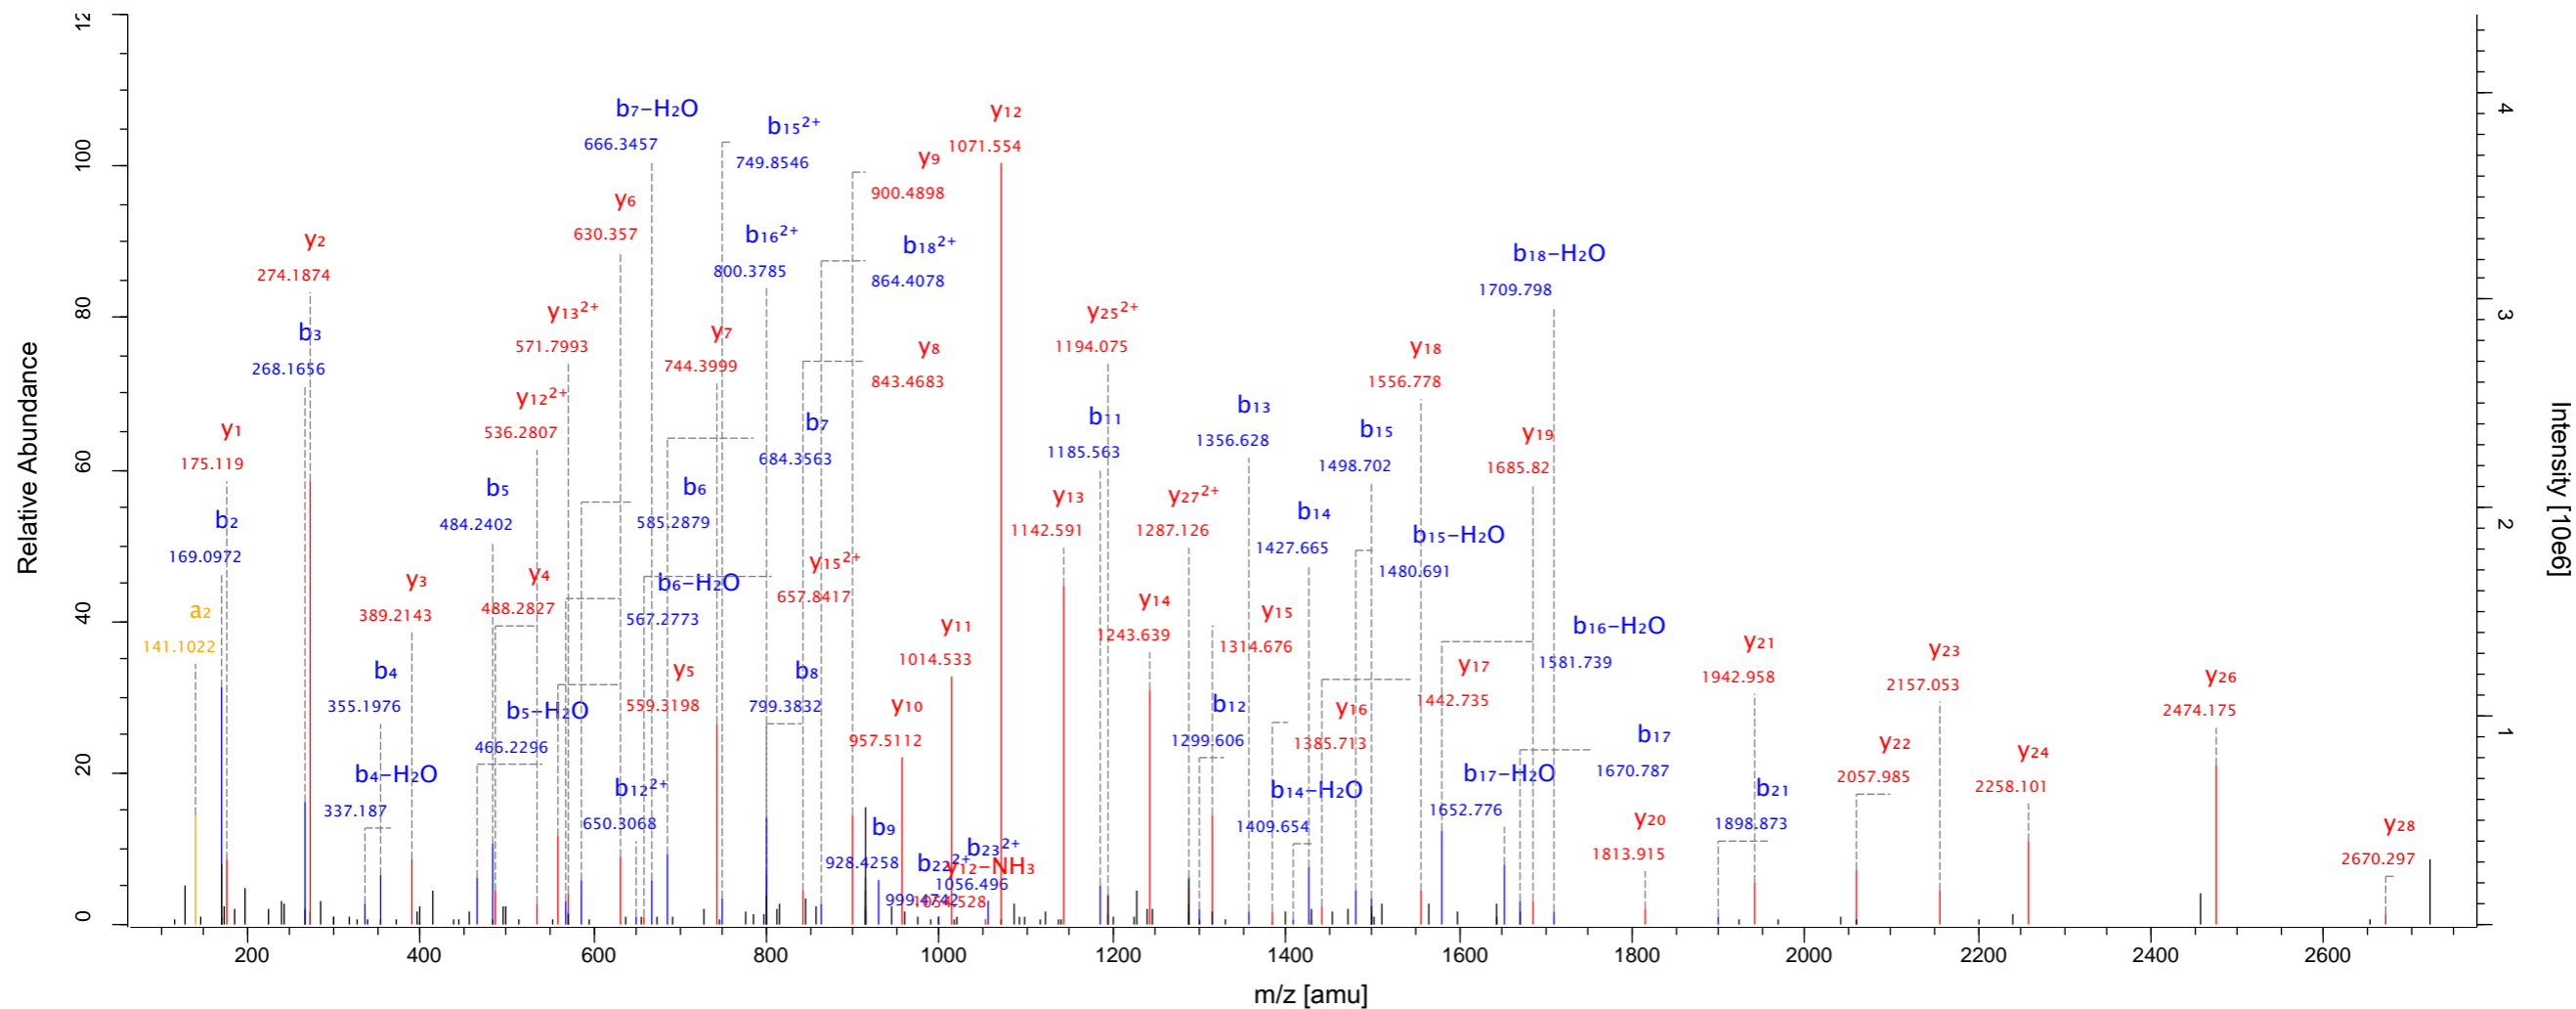

Raw file: 20111212\_EXQ5\_AnMi\_QC\_HCMVp1\_13

Scan number: 28961

Protein: ORFL321W + NC\_006273.2[191968,194126]+ <unknown description>; ORFL321W.iORF1 + NC\_006273.2[191968,194126]+ <unknown description>; ORFL321W.iORF4 + NC\_006273.2[193200,194126]+ <unknown description>

Peptide score: 134.21

Method: FTMS; HCD

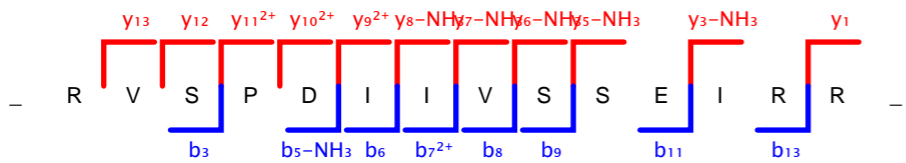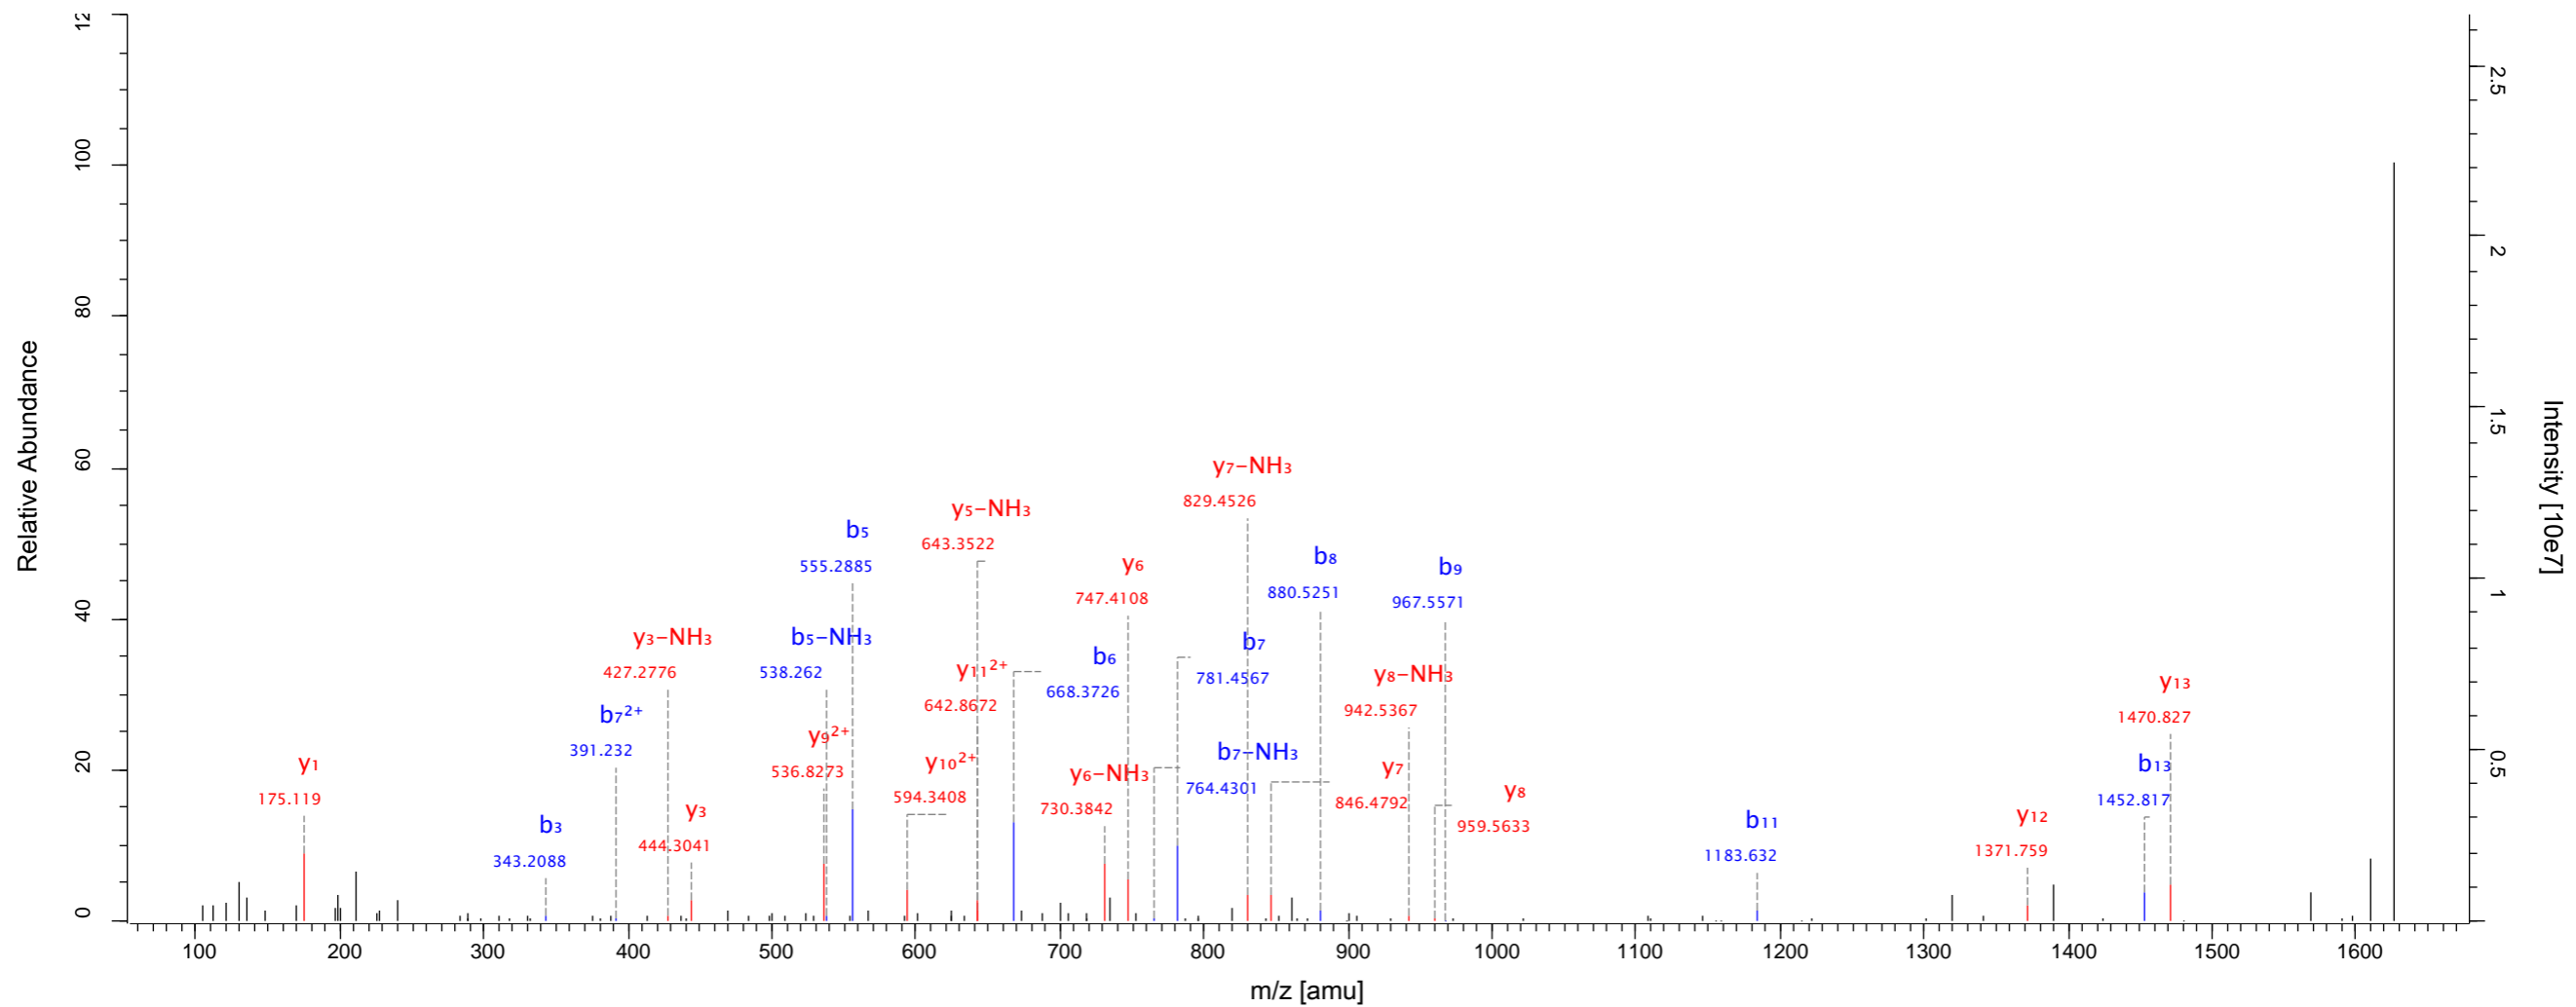



Raw file: 20111212\_EXQ5\_AnMi\_QC\_HCMVp1\_13

Scan number: 33225

Protein: ORFL159W + NC\_006273.2[101475,109052]+ <unknown description>; ORFL159W.iORF1 + NC\_006273.2[101526,109052]+ <unknown description>; ORFL178W + NC\_006273.2[108142,109052]+ <unknown description>; ORFL163W + NC\_006273.2[101475,109052]+ <unknown description>

Peptide score: 164.64

Method: FTMS; HCD

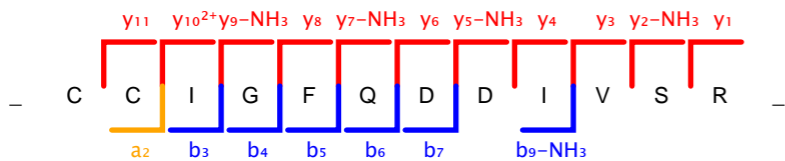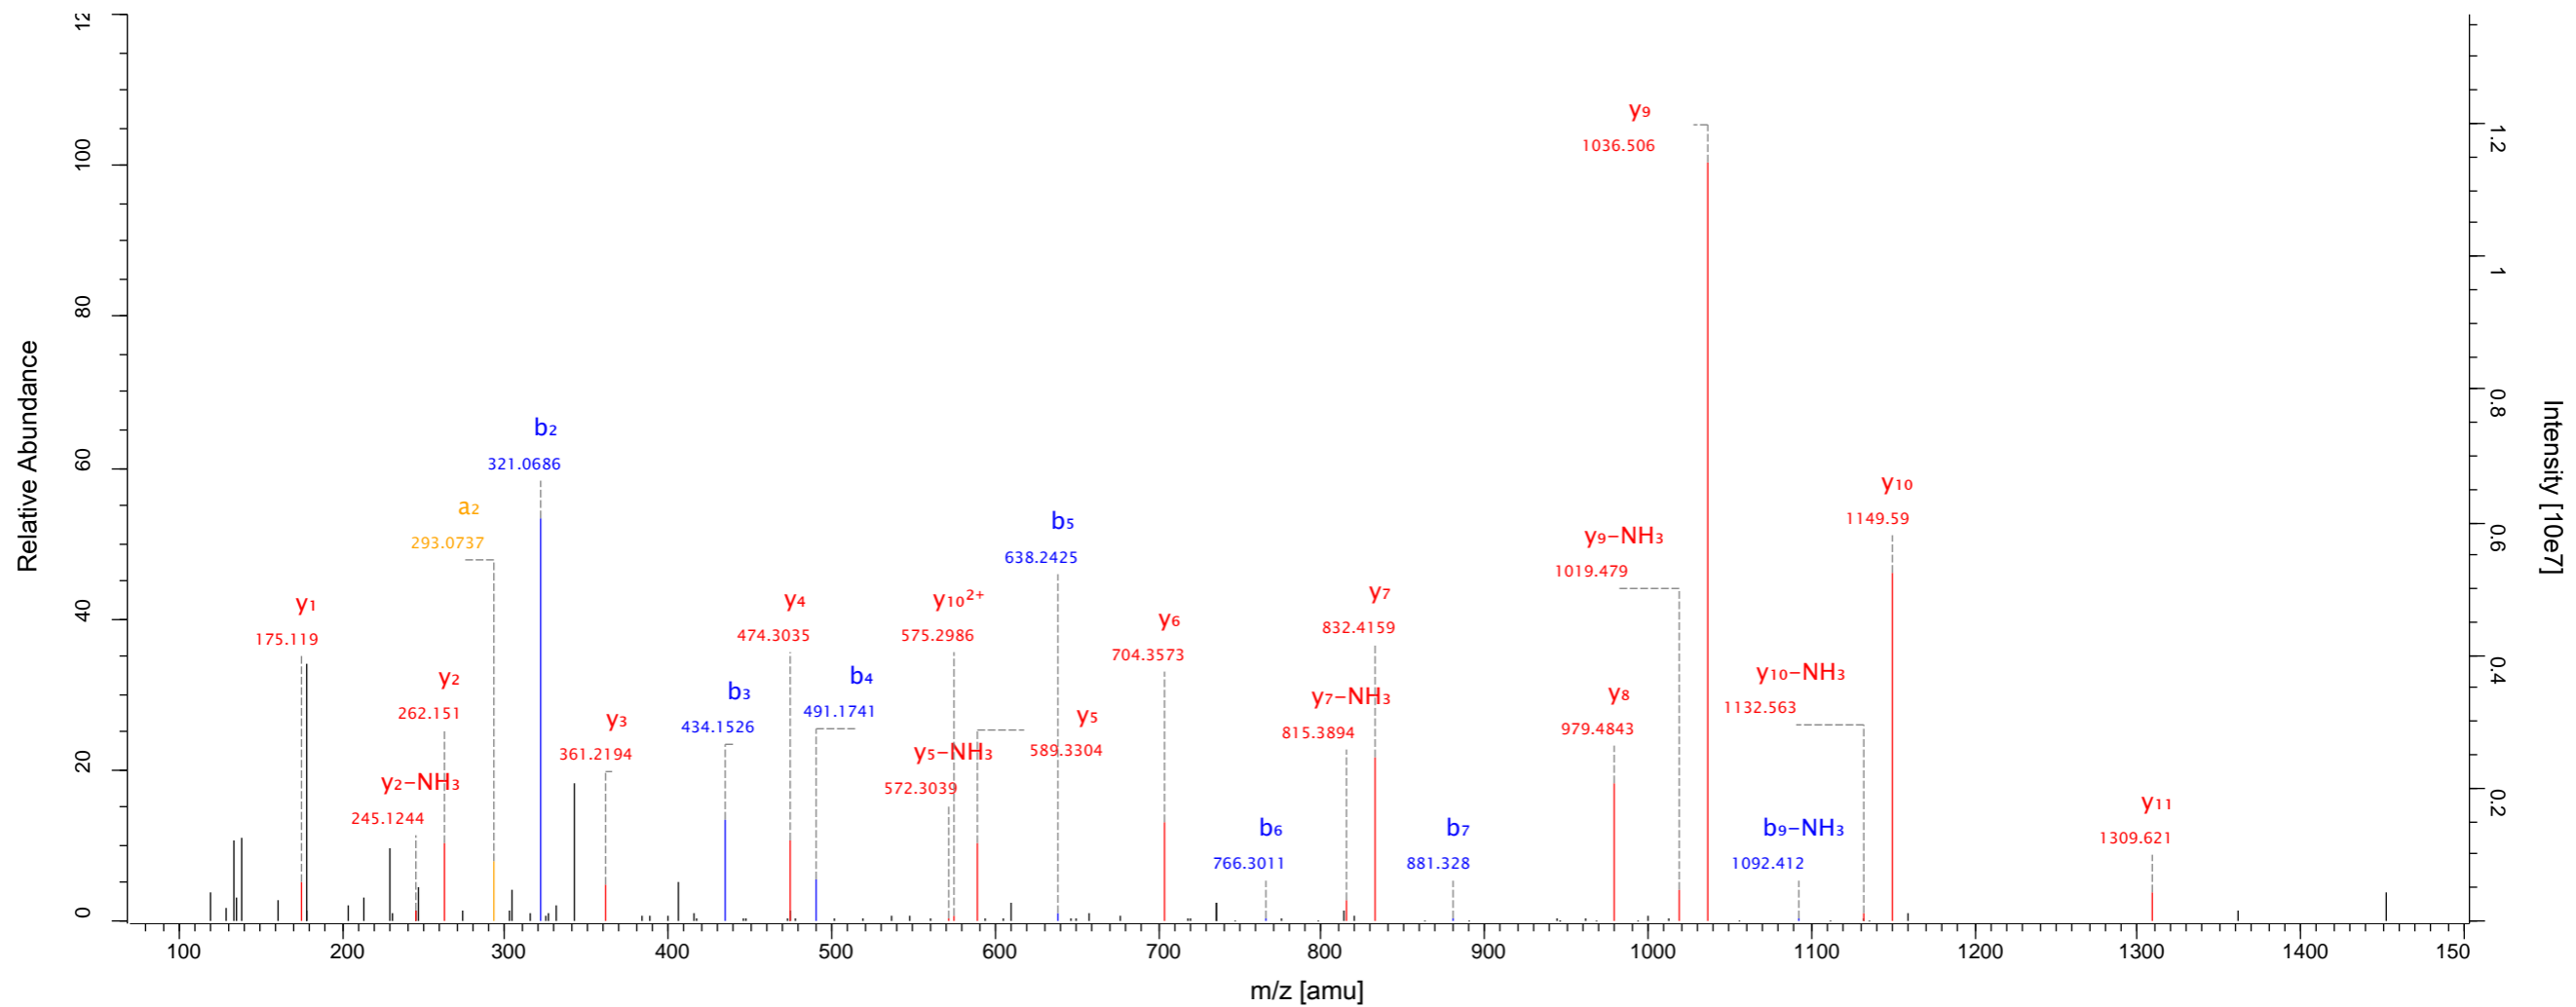

Raw file: 20111212\_EXQ5\_AnMi\_QC\_HCMVp11\_13  
 Scan number: 38875  
 Protein: ORFL321W + NC\_006273.2[191968,194126]+ <unknown description>; ORFL321W.iORF1 + NC\_006273.2[191968,194126]+ <unknown description>; ORFL321W.iORF4 + NC\_006273.2[193200,194126]+ <unknown description>  
 Peptide score: 169.04  
 Method: FTMS; HCD

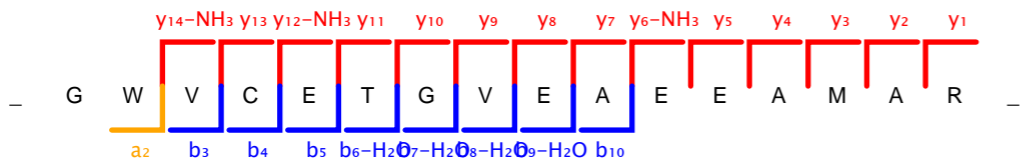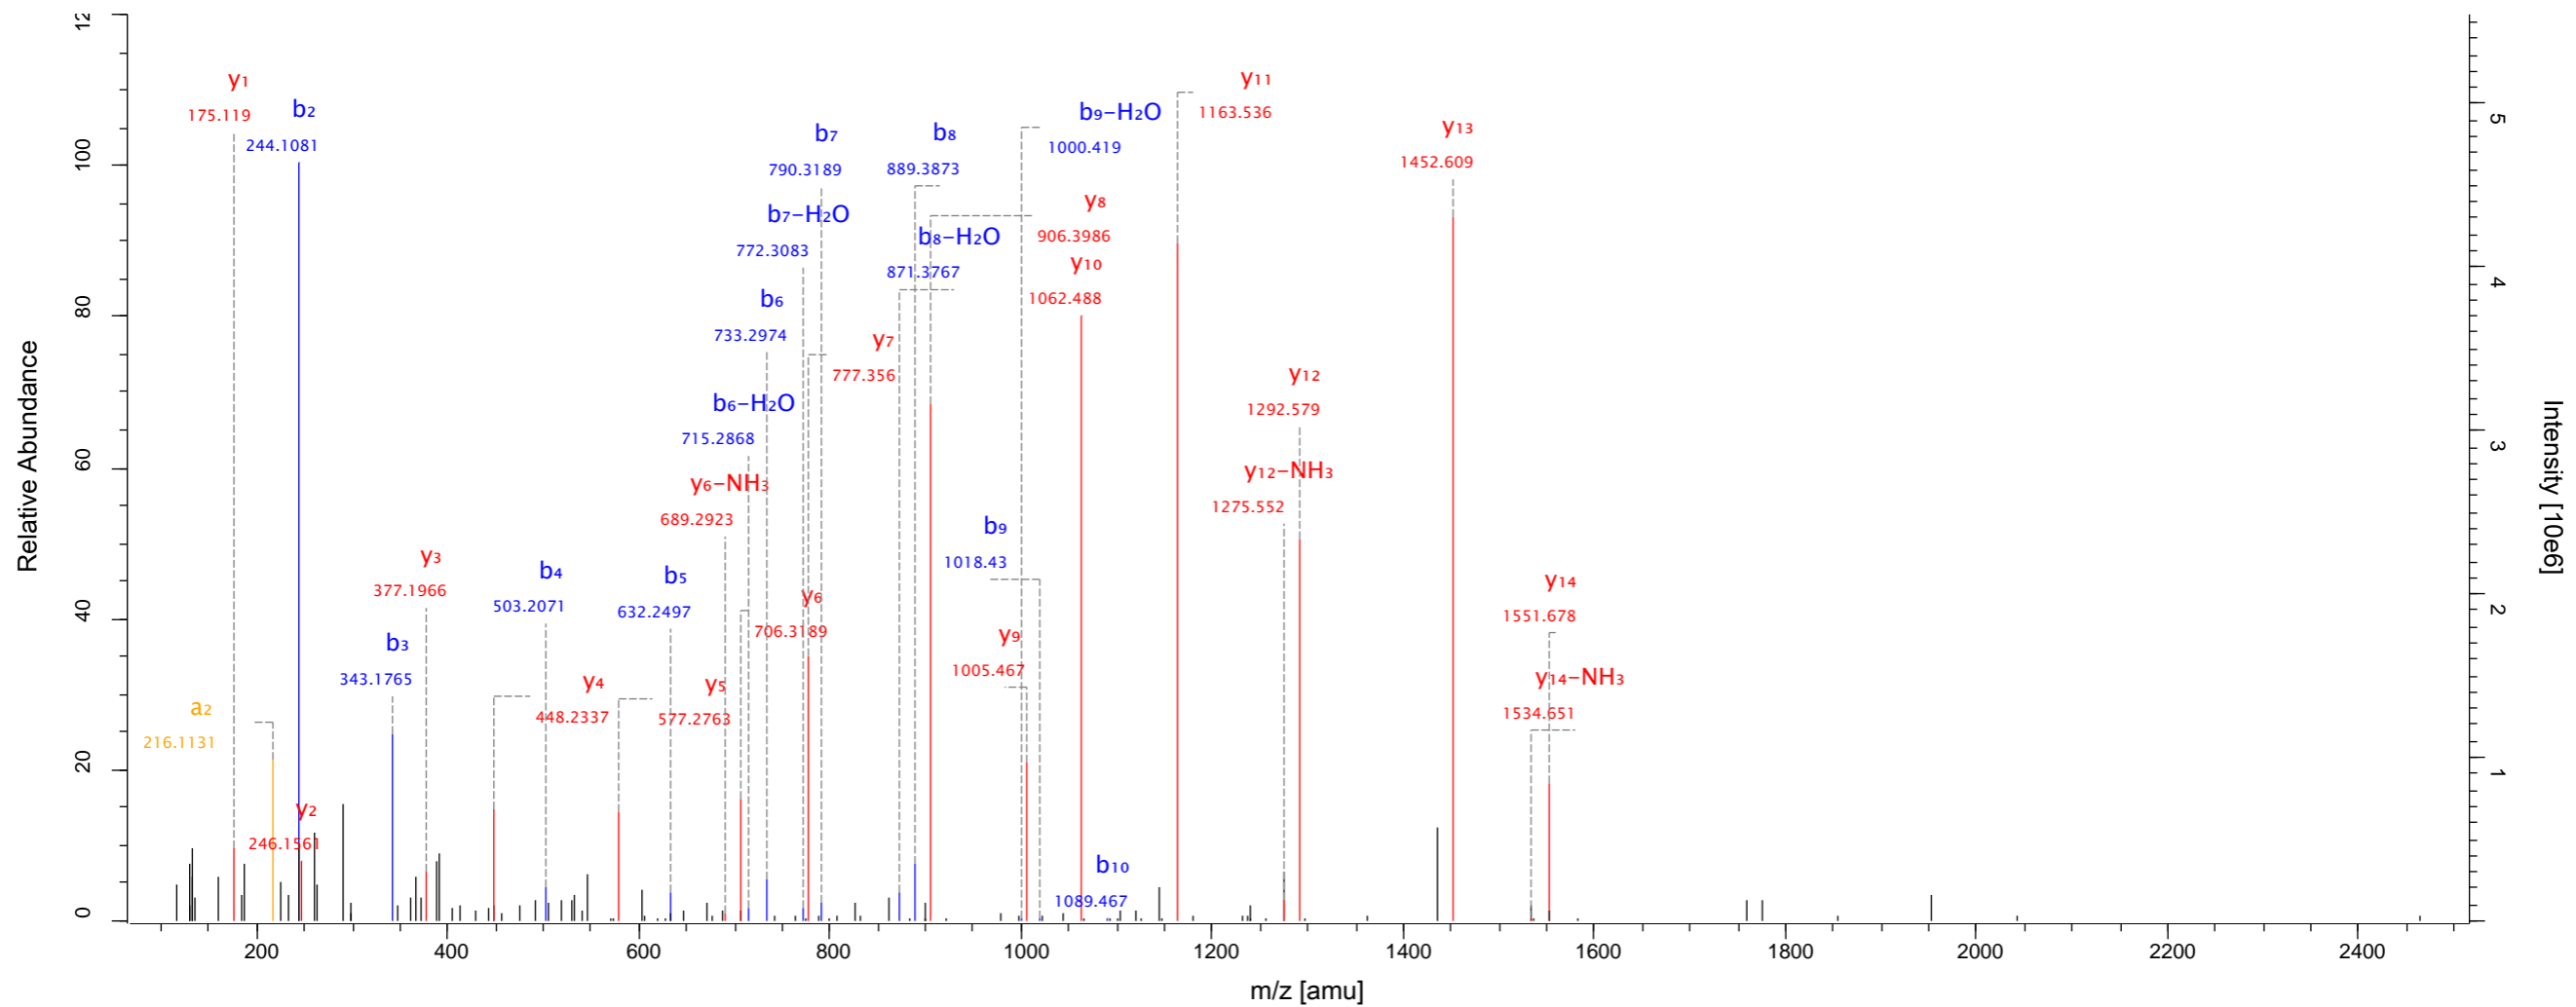

Raw file: 20111212\_EXQ5\_AnMi\_QC\_HCMVp11\_13

Scan number: 50936

Protein: ORFL321W + NC\_006273.2[191968,194126]+ <unknown description>; ORFL321W.iORF1 + NC\_006273.2[191968,194126]+ <unknown description>; ORFL321W.iORF4 + NC\_006273.2[193200,194126]+ <unknown description>

Peptide score: 132.22

Method: FTMS; HCD

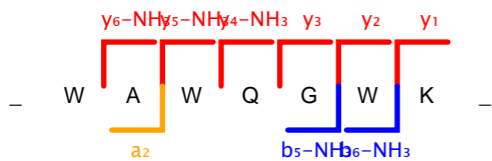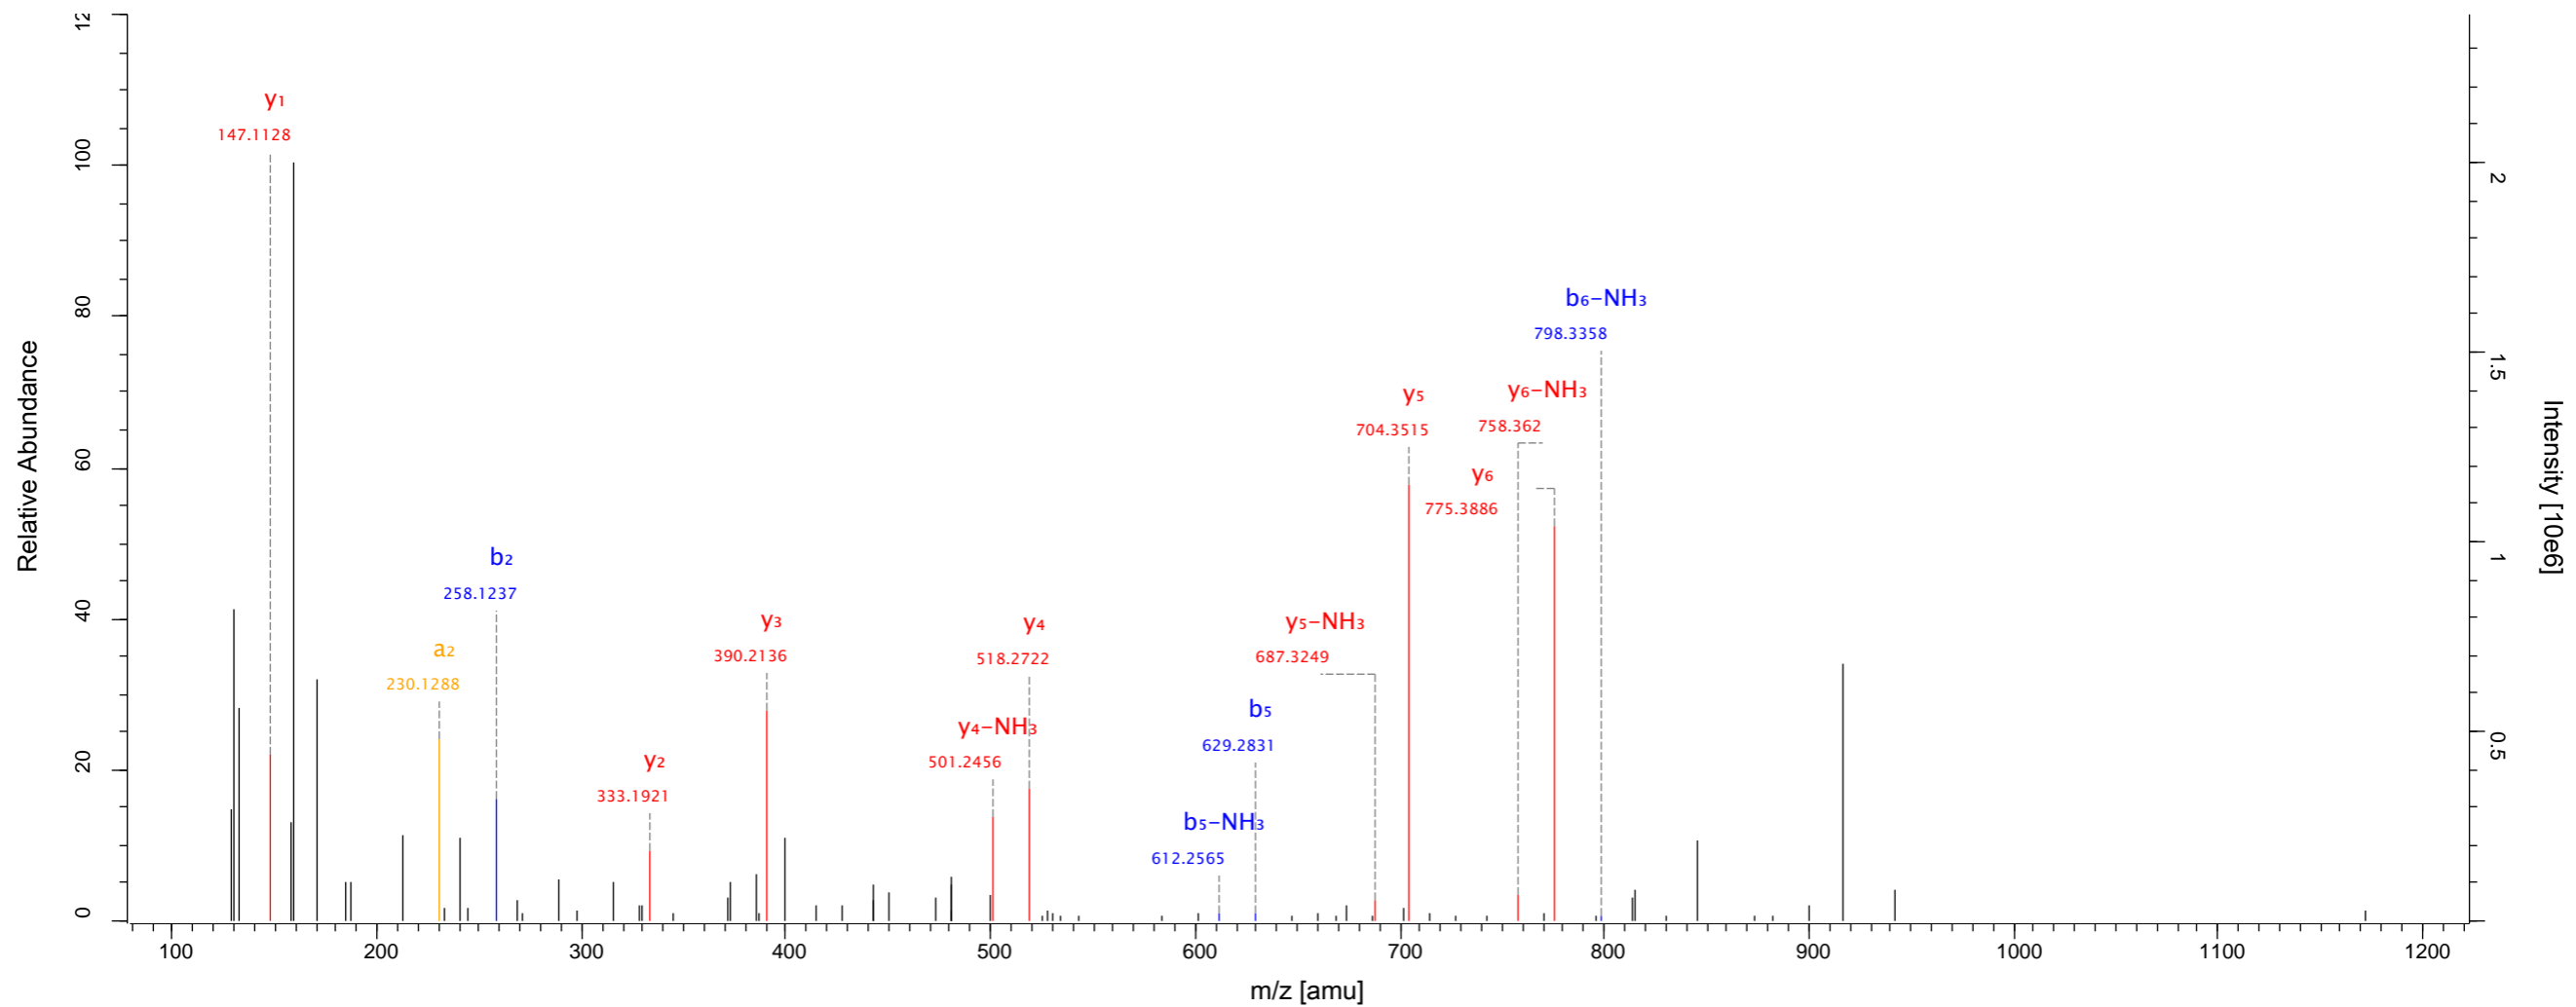

Raw file: 20111212\_EXQ5\_AnMi\_QC\_HCMVp11\_13

Scan number: 5923

Protein: ORFL321W + NC\_006273.2[191968,194126]+ <unknown description>; ORFL321W.iORF1 + NC\_006273.2[191968,194126]+ <unknown description>; ORFL321W.iORF4 + NC\_006273.2[193200,194126]+ <unknown description>

Peptide score: 108.81

Method: FTMS; HCD

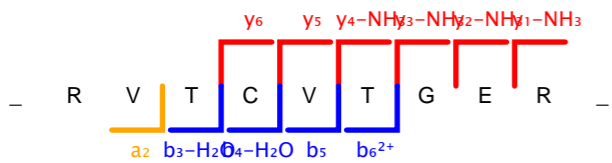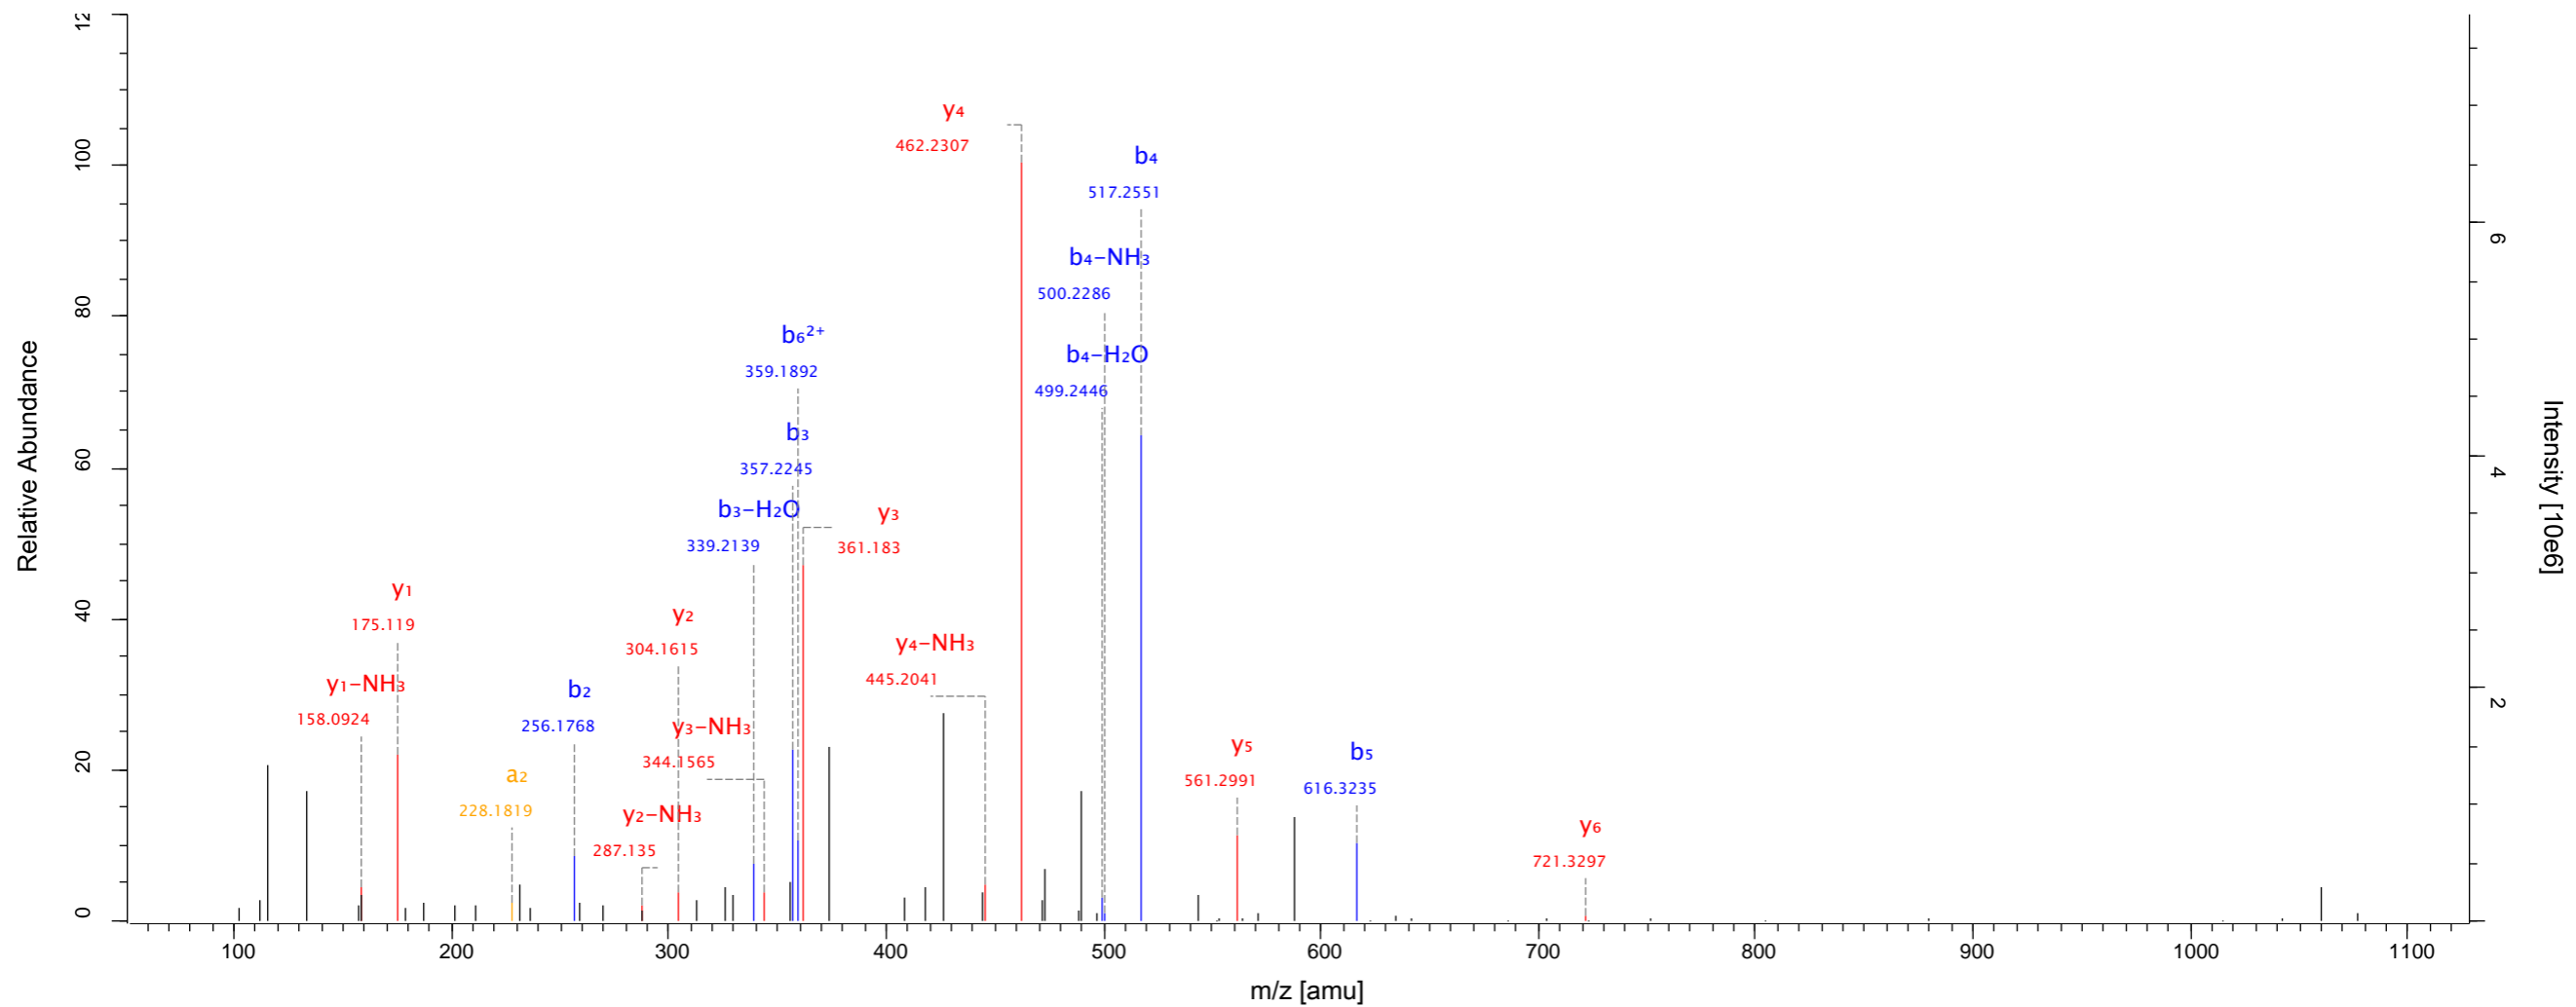

Raw file: 20111212\_EXQ5\_AnMi\_QC\_HCMVp11\_14  
 Scan number: 16371  
 Protein: ORFL321W + NC\_006273.2[191968,194126]+ <unknown description>; ORFL321W.iORF1 + NC\_006273.2[191968,194126]+ <unknown description>  
 Peptide score: 137.43  
 Method: FTMS; HCD

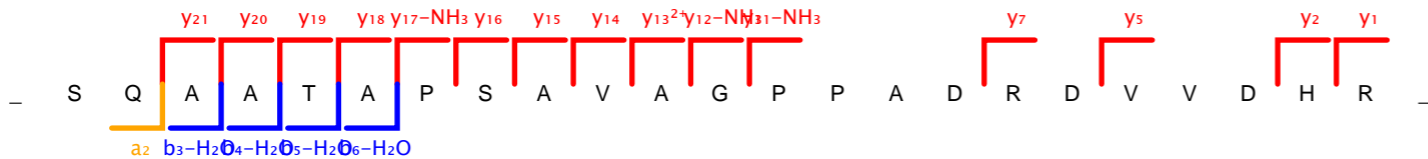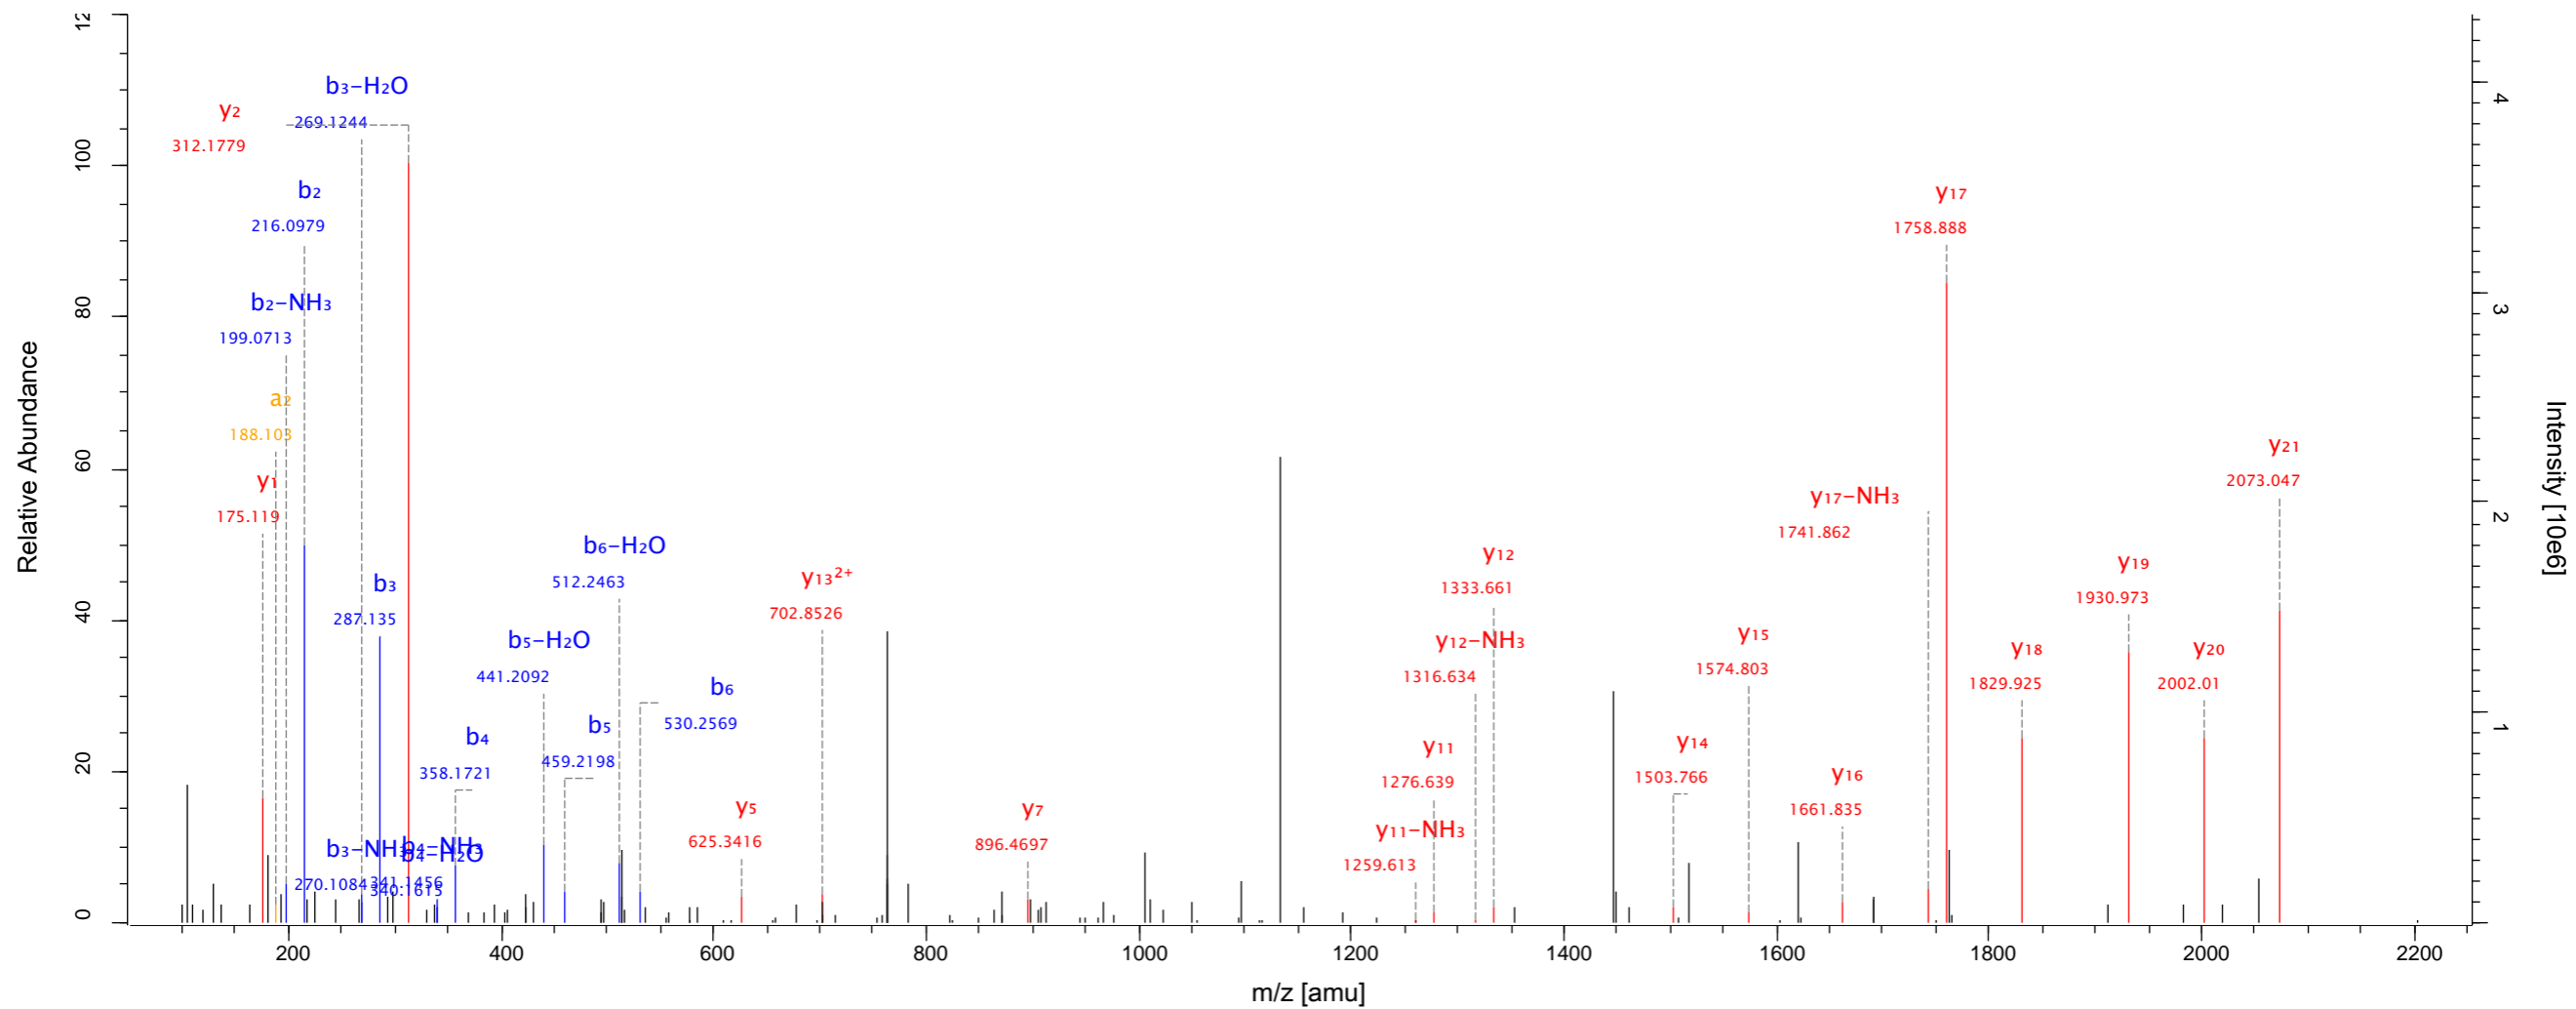

Raw file: 20111212\_EXQ5\_AnMi\_QC\_HCMVp1\_14  
 Scan number: 22387  
 Protein: ORFL251W + NC\_006273.2[161872,163748]+ <unknown description>; ORFL253W.iORF1 + NC\_006273.2[161917,163748]+ <unknown description>  
 Peptide score: 290.62  
 Method: FTMS; HCD

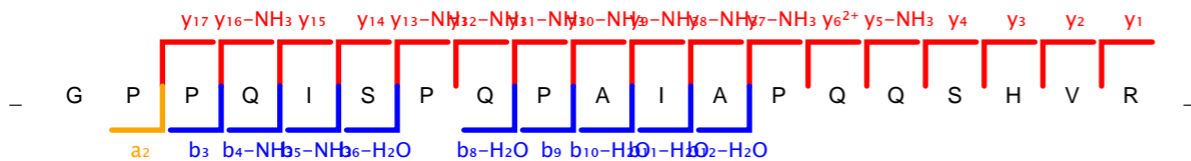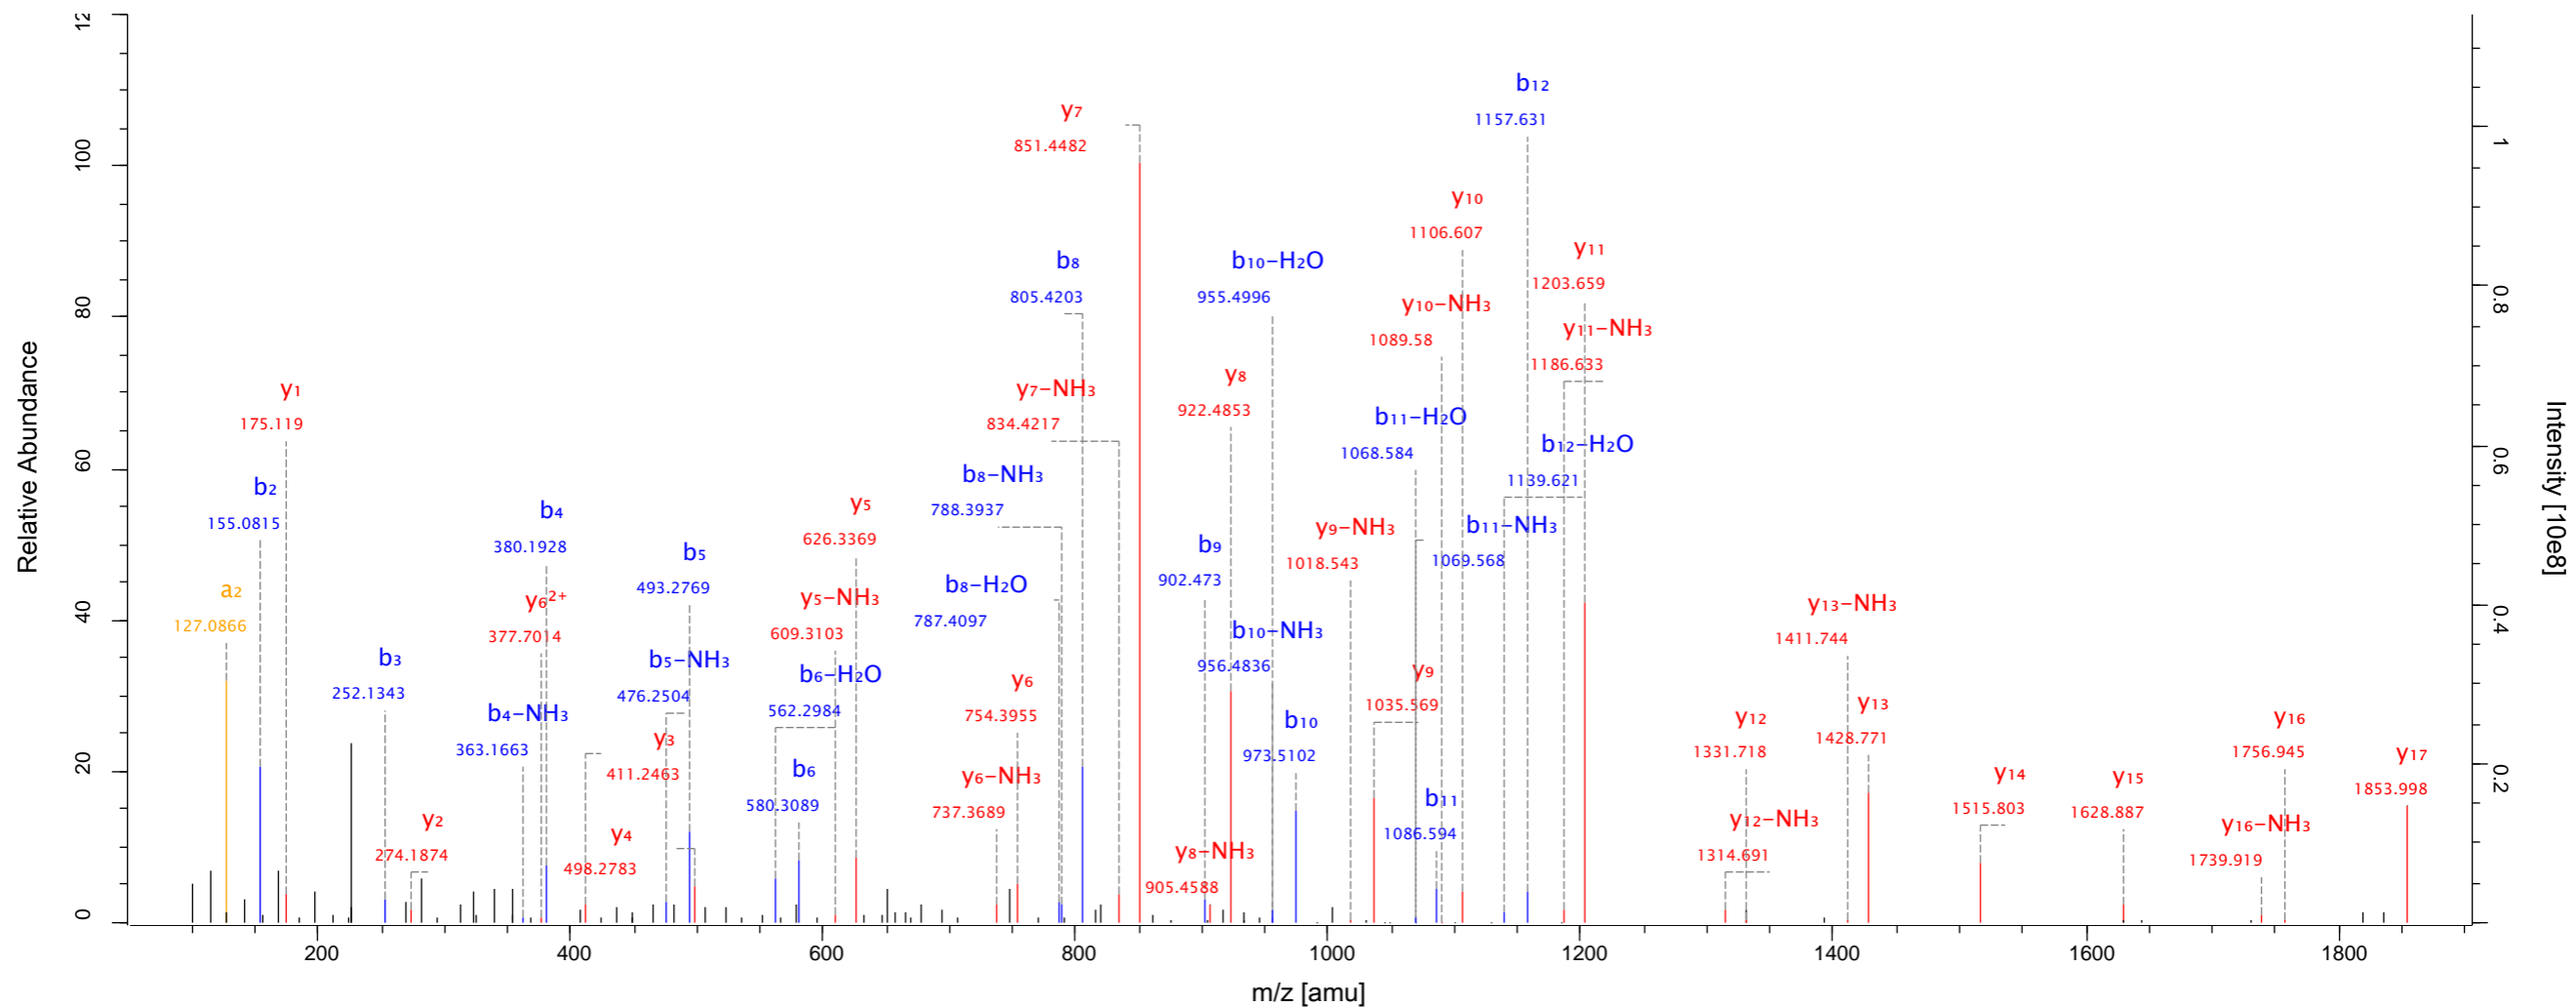

Raw file: 20111212\_EXQ5\_AnMi\_QC\_HCMVp1\_14  
 Scan number: 23268  
 Protein: ORFL251W + NC\_006273.2[161872,163748]+ <unknown description>; ORFL253W.iORF1 + NC\_006273.2[161917,163748]+ <unknown description>  
 Peptide score: 169.65  
 Method: FTMS; HCD

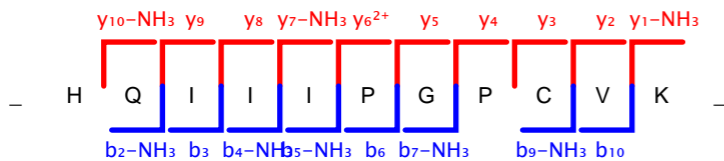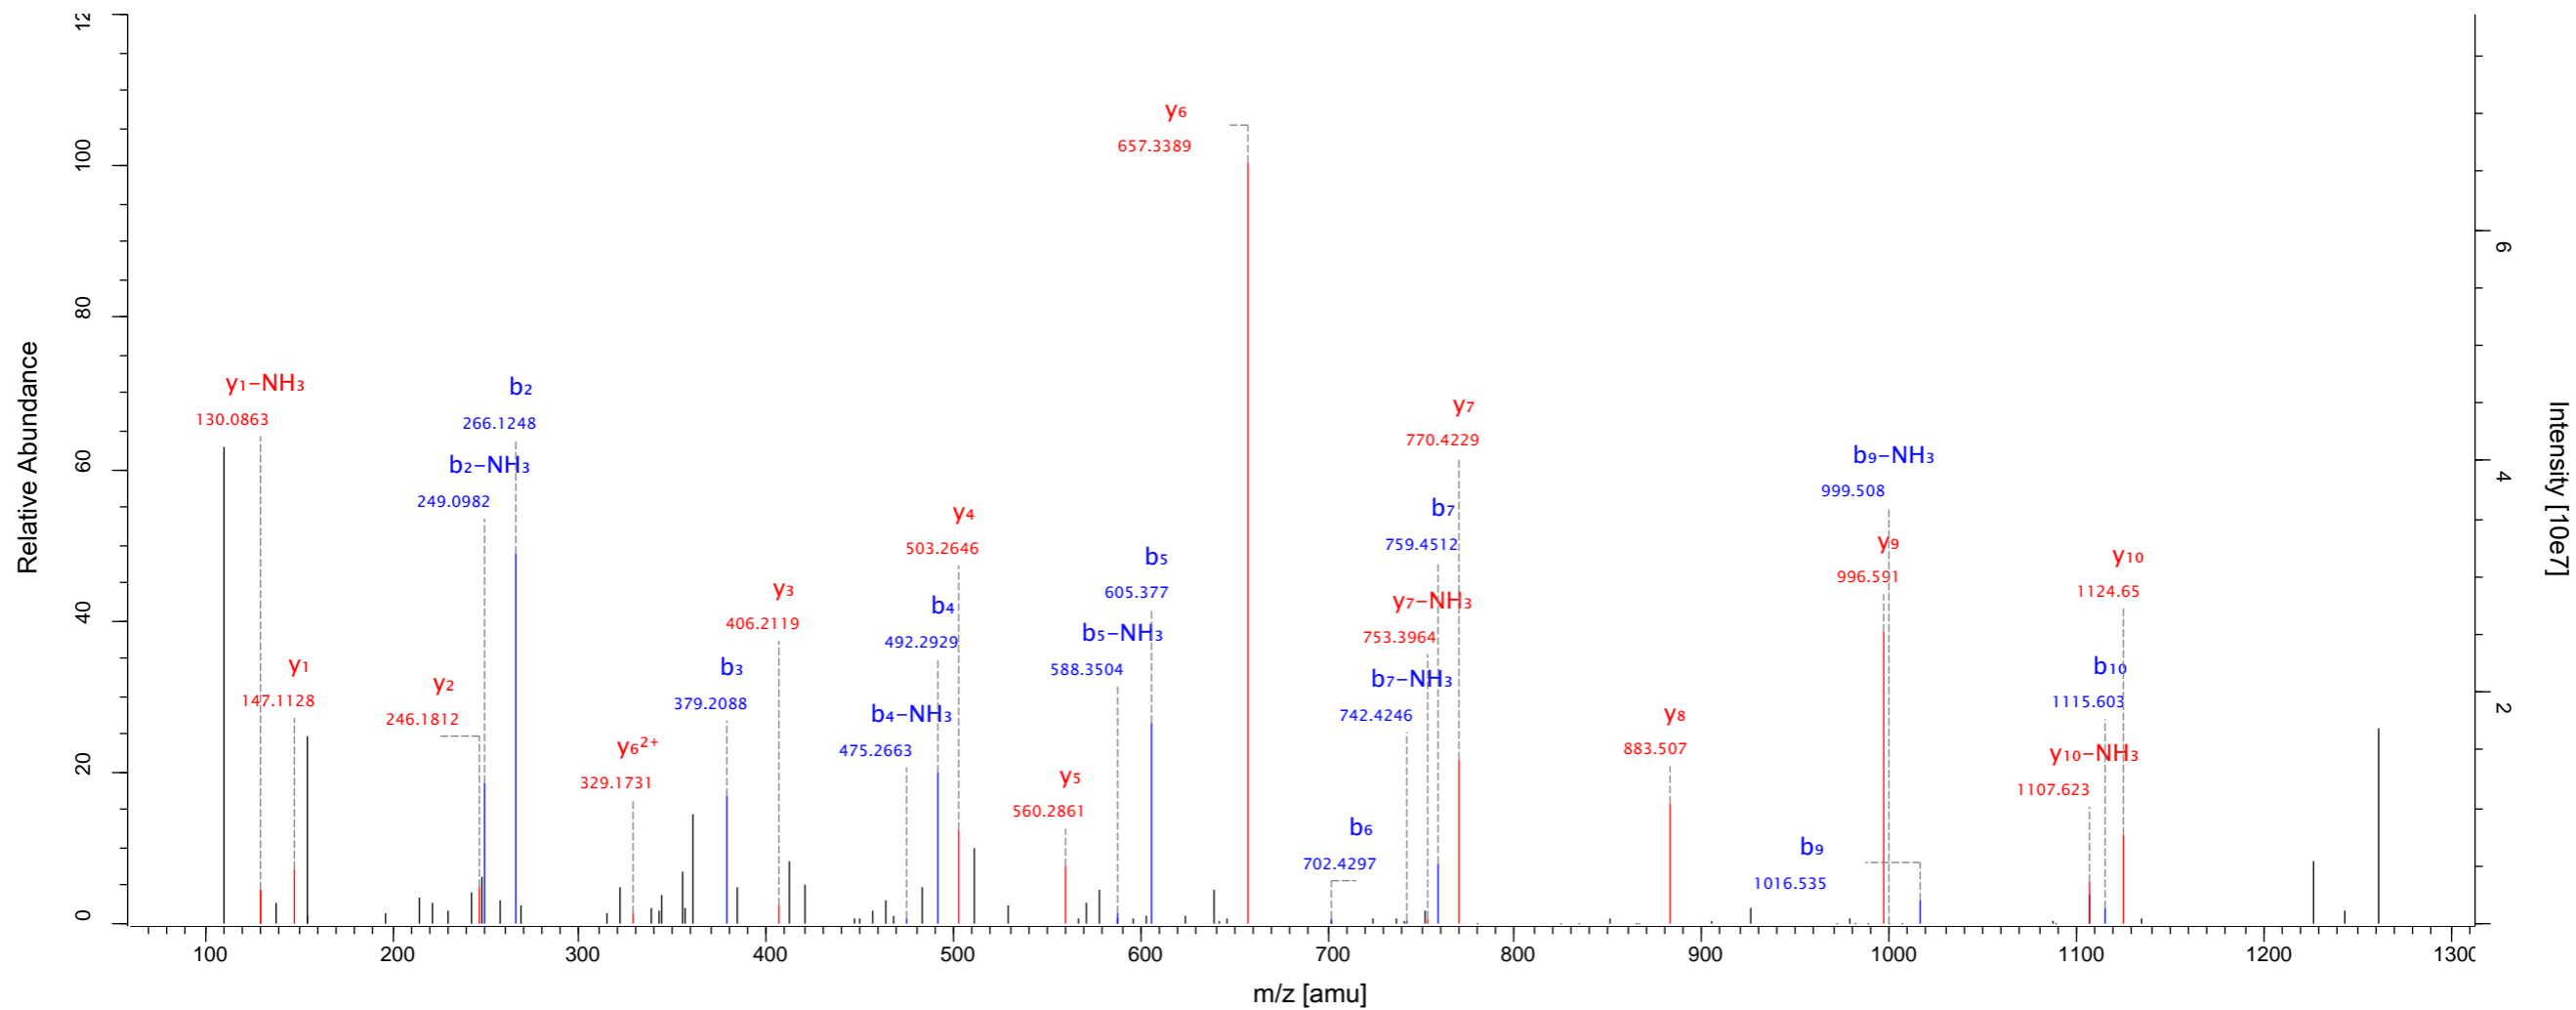

Raw file: 20111212\_EXQ5\_AnMi\_QC\_HCMVpl1\_14  
 Scan number: 31890  
 Protein: ORFL251W + NC\_006273.2[161872,163748]+ <unknown description>; ORFL253W.iORF1 + NC\_006273.2[161917,163748]+ <unknown description>  
 Peptide score: 45.46  
 Method: FTMS; HCD

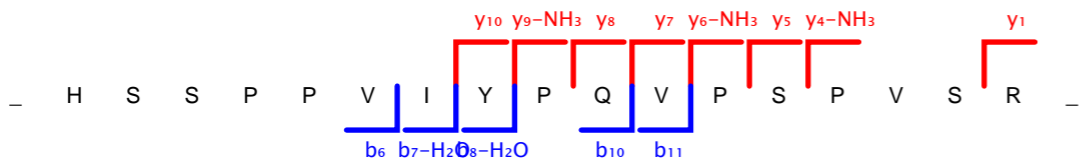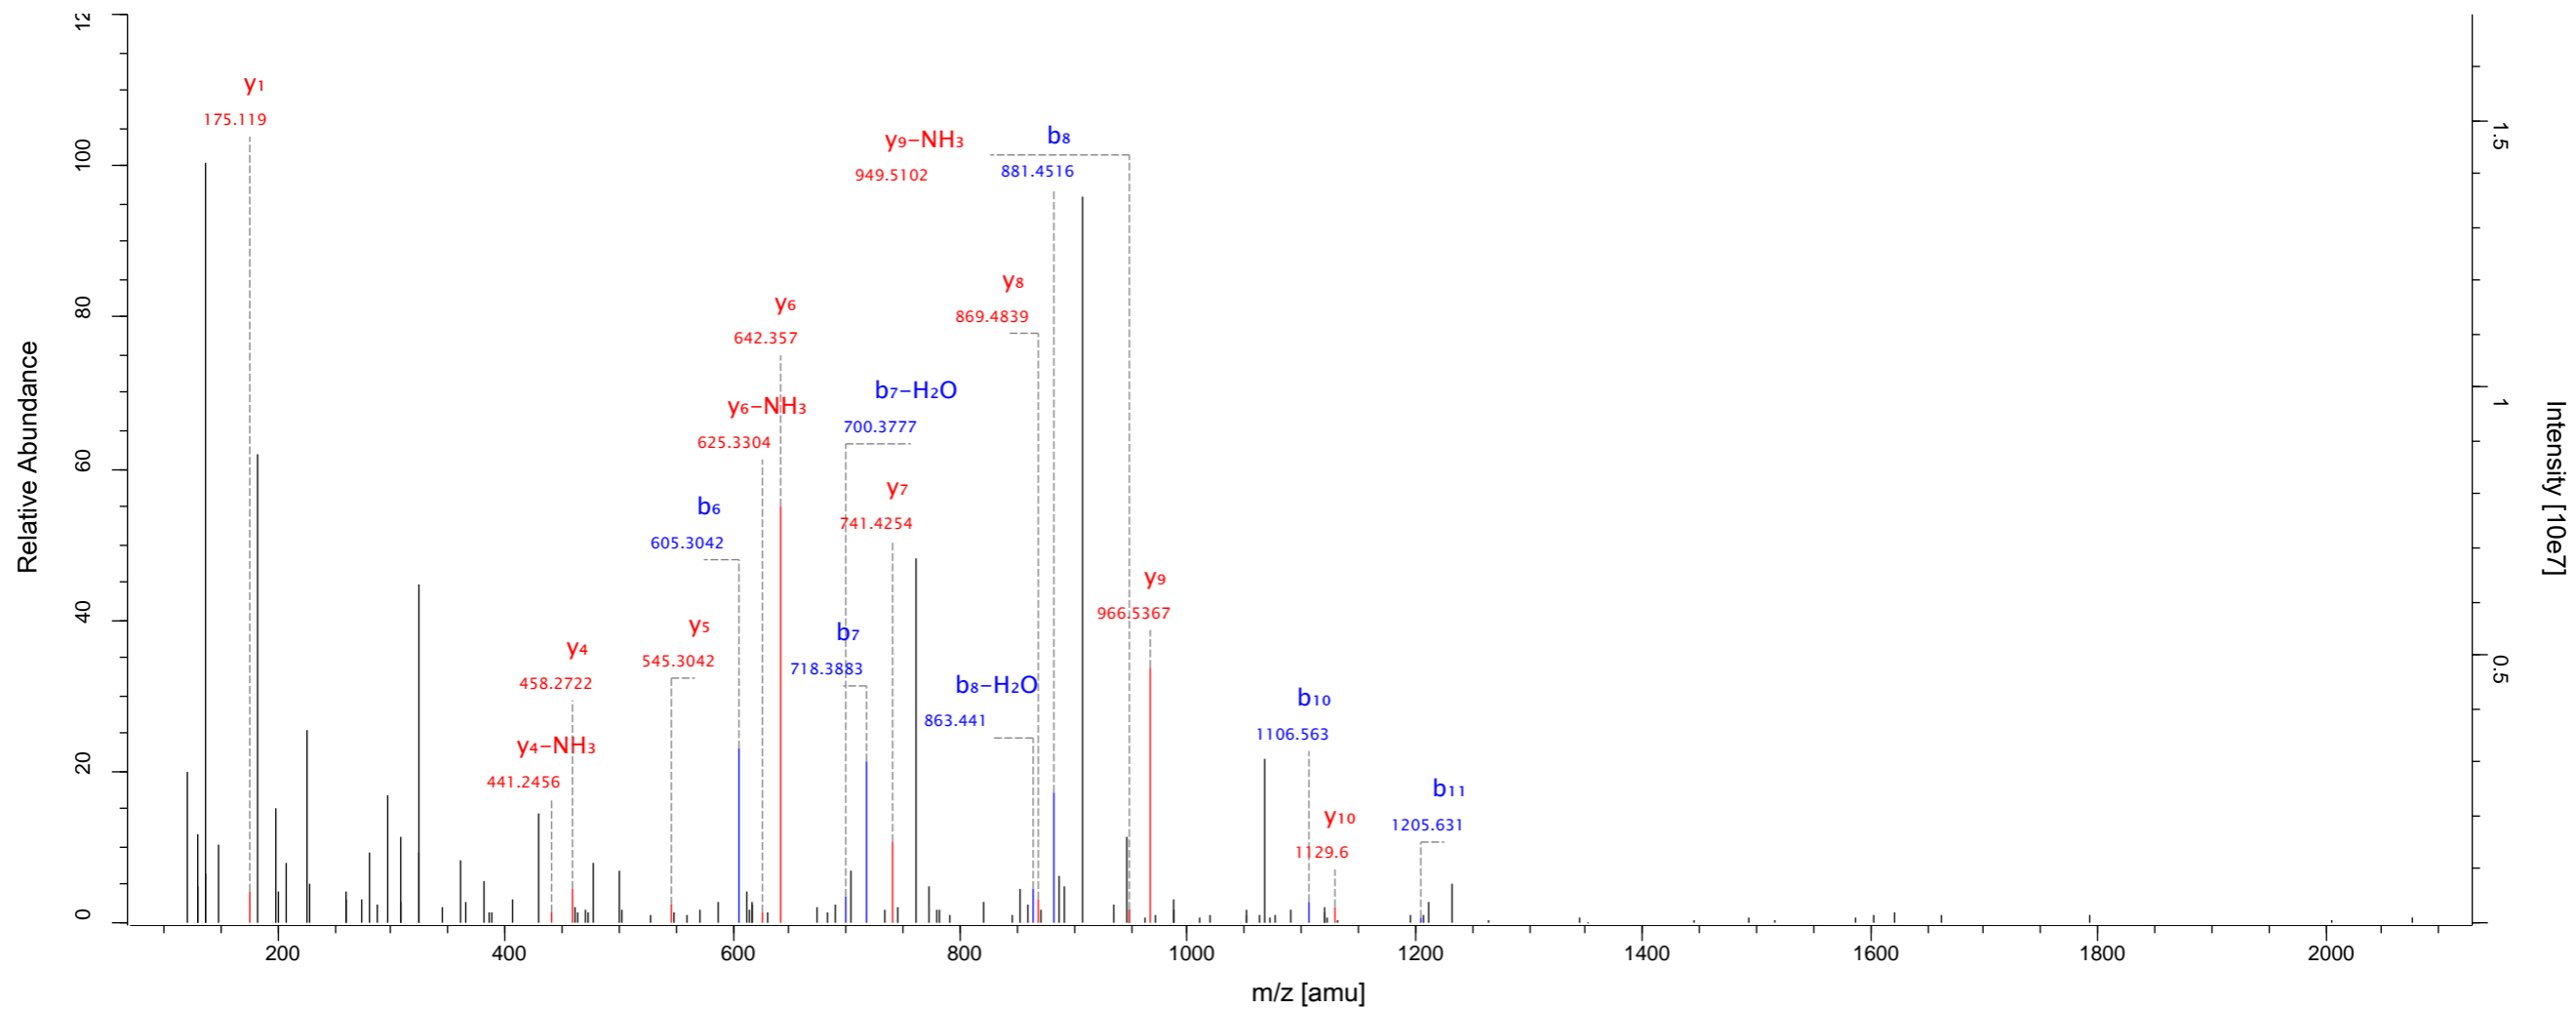



Raw file: 20111212\_EXQ5\_AnMi\_QC\_HCMVp1\_14  
 Scan number: 33839  
 Protein: ORFL251W + NC\_006273.2[161872,163748]+ <unknown description>; ORFL253W.iORF1 + NC\_006273.2[161917,163748]+ <unknown description>  
 Peptide score: 125.88  
 Method: FTMS; HCD

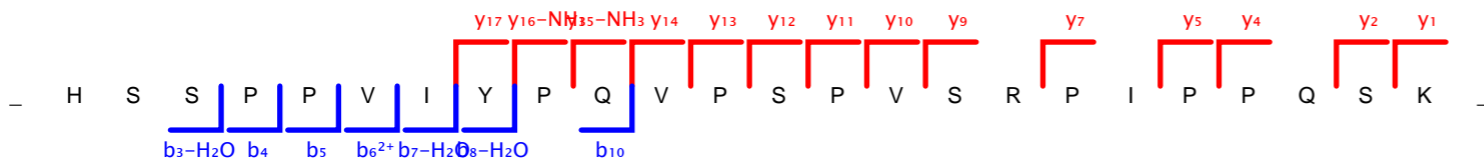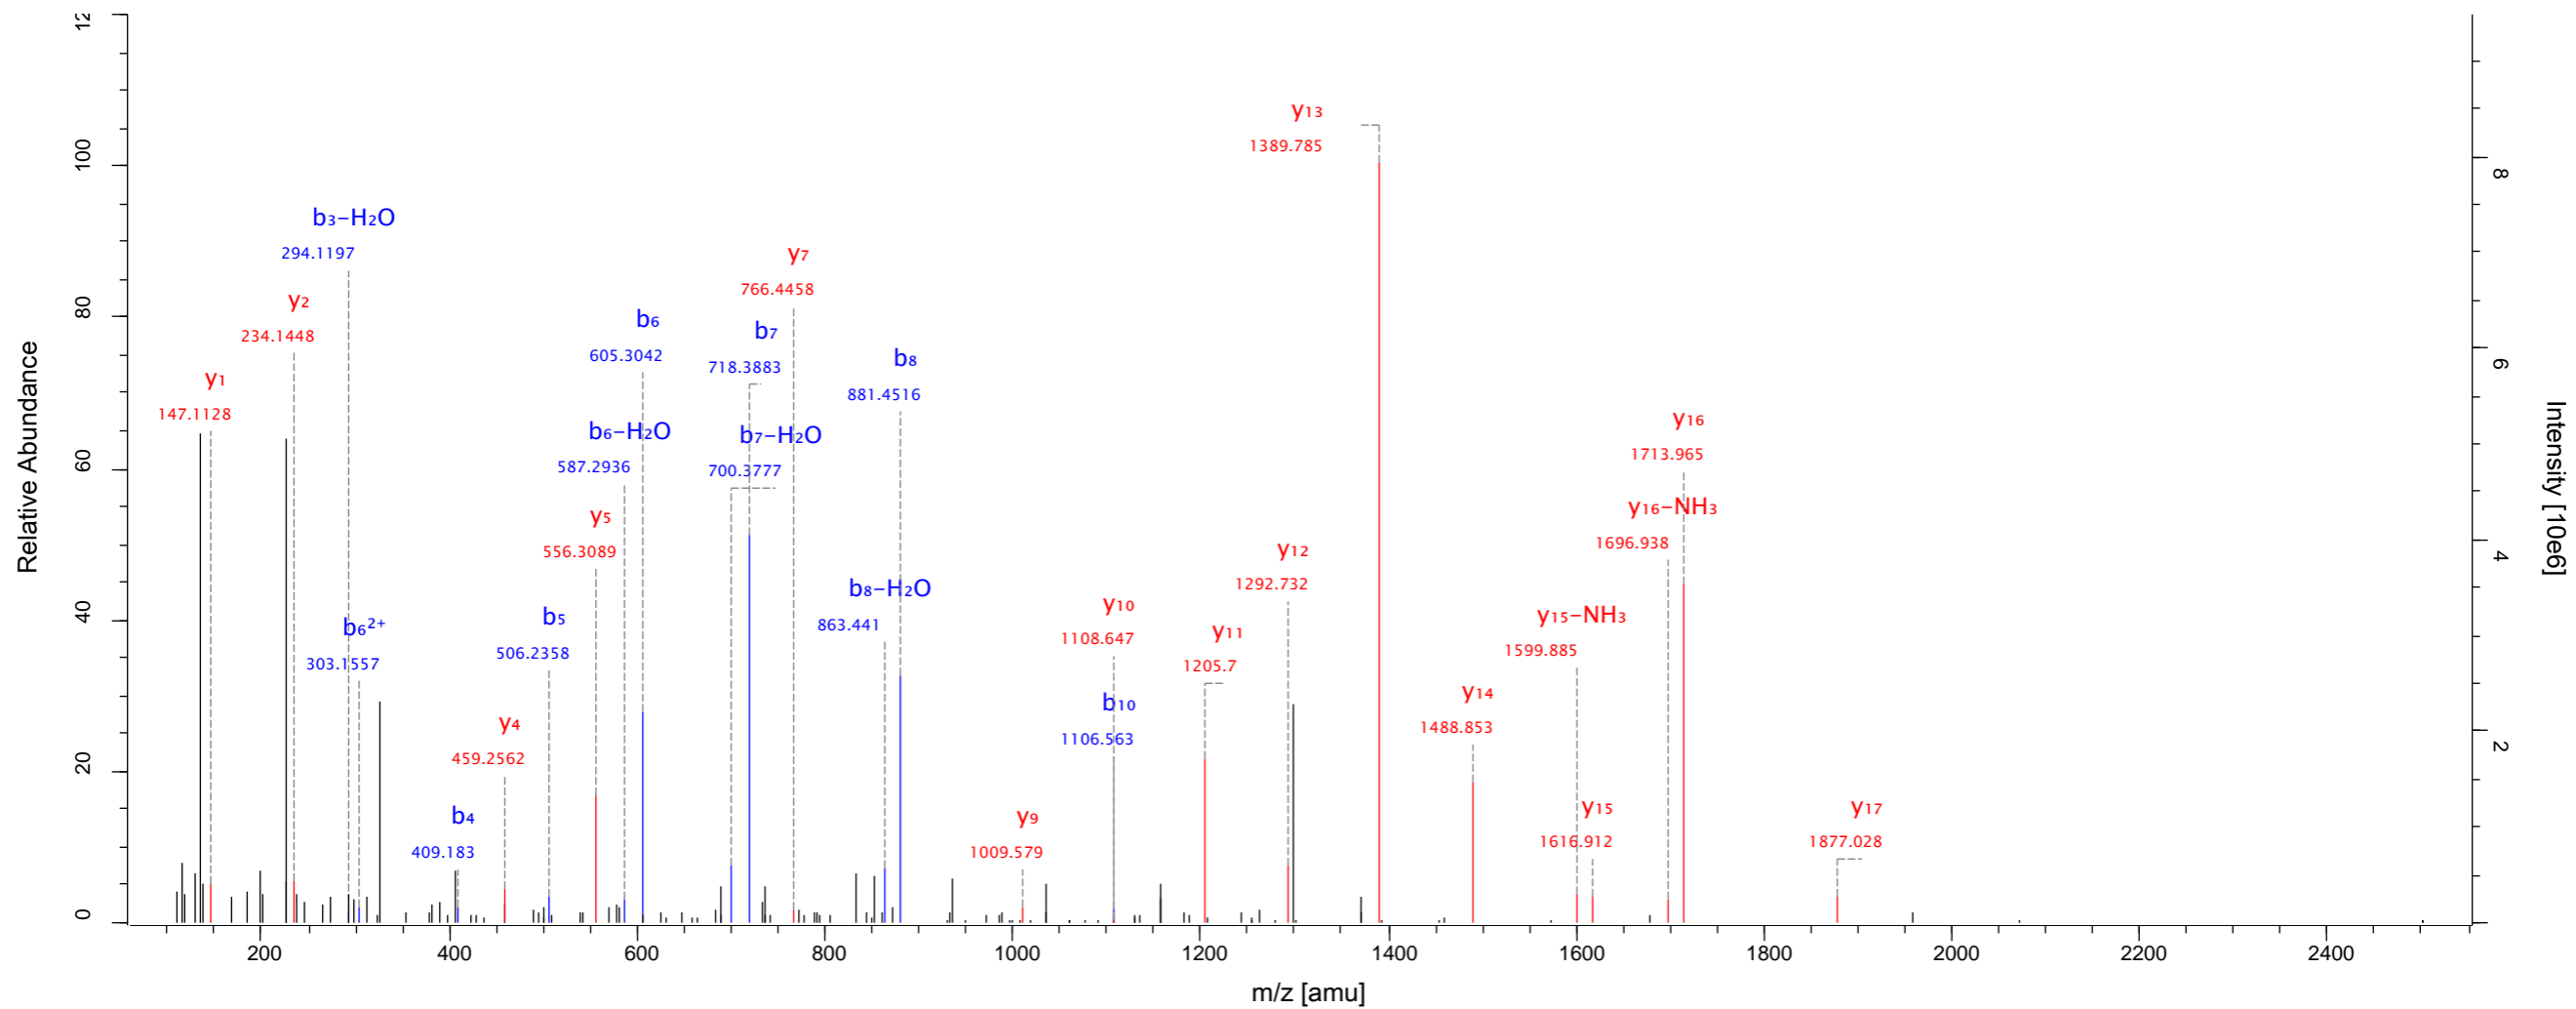

Raw file: 20111212\_EXQ5\_AnMi\_QC\_HCMVp1\_14  
 Scan number: 58621  
 Protein: ORFL147C - NC\_006273.2[85932,87362]- <unknown description>  
 Peptide score: 176.53  
 Method: FTMS; HCD

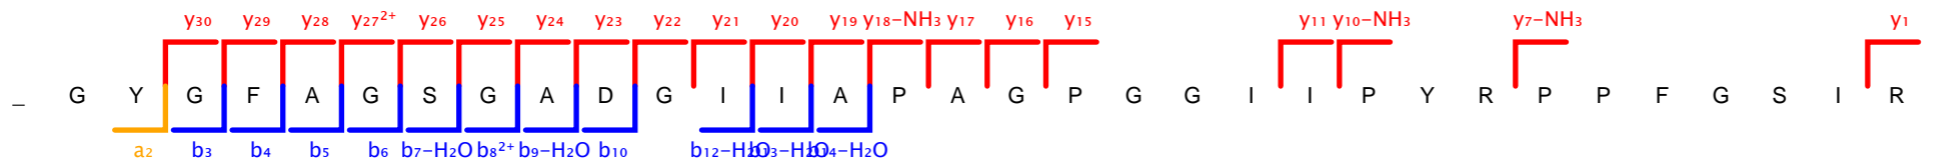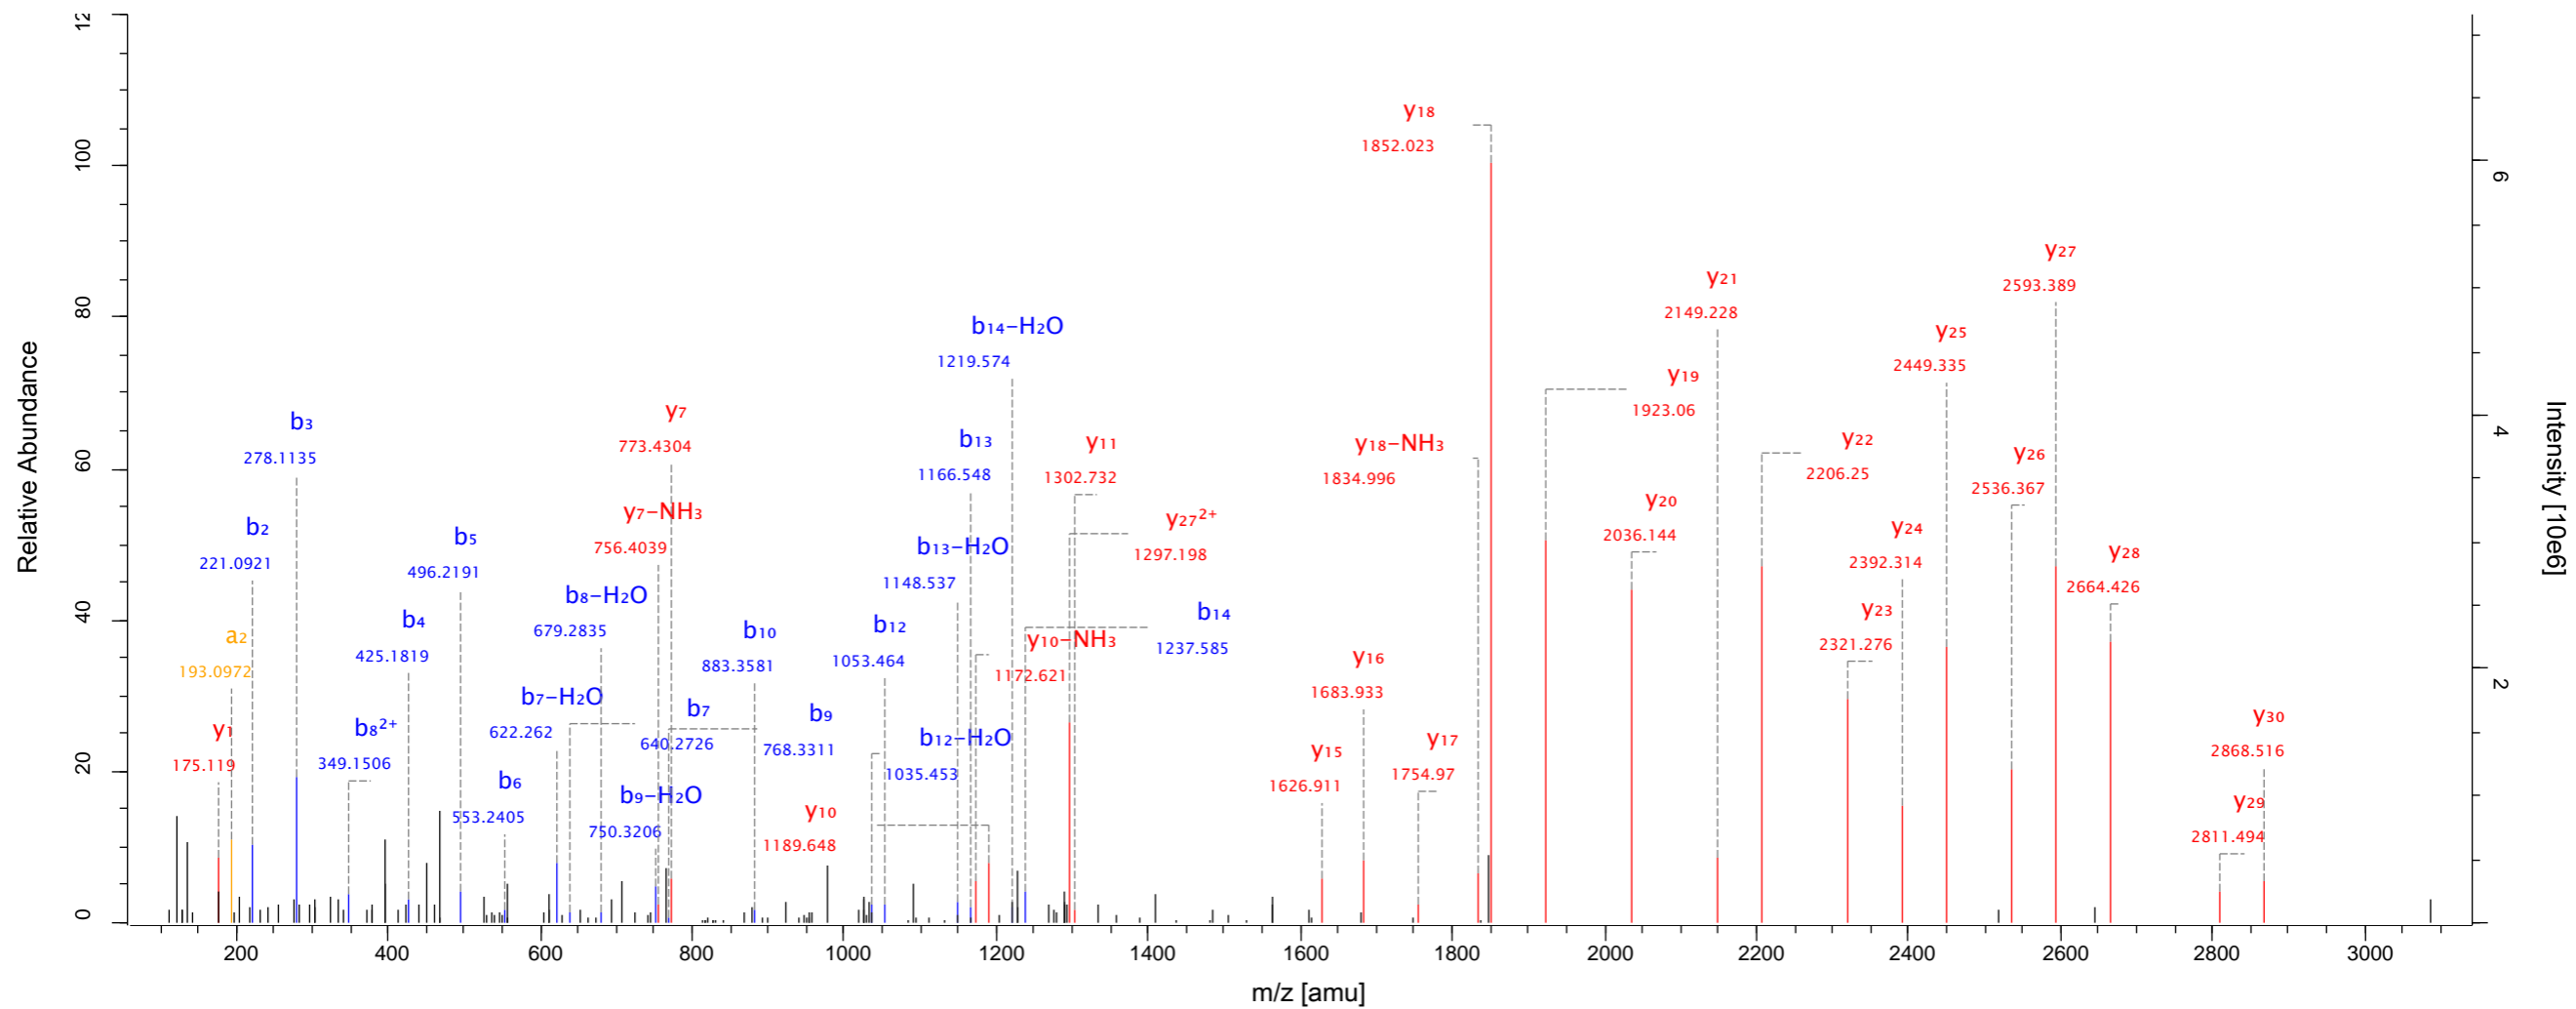

Raw file: 20111212\_EXQ5\_AnMi\_QC\_HCMVp11\_14  
 Scan number: 8179  
 Protein: ORFL147C - NC\_006273.2[85932,87362]- <unknown description>  
 Peptide score: 143.31  
 Method: FTMS; HCD

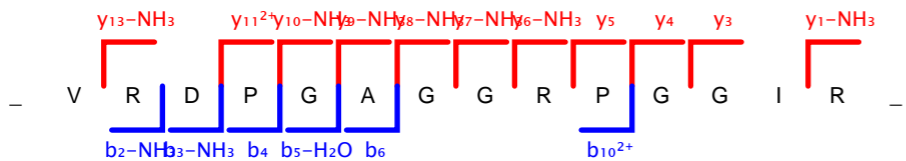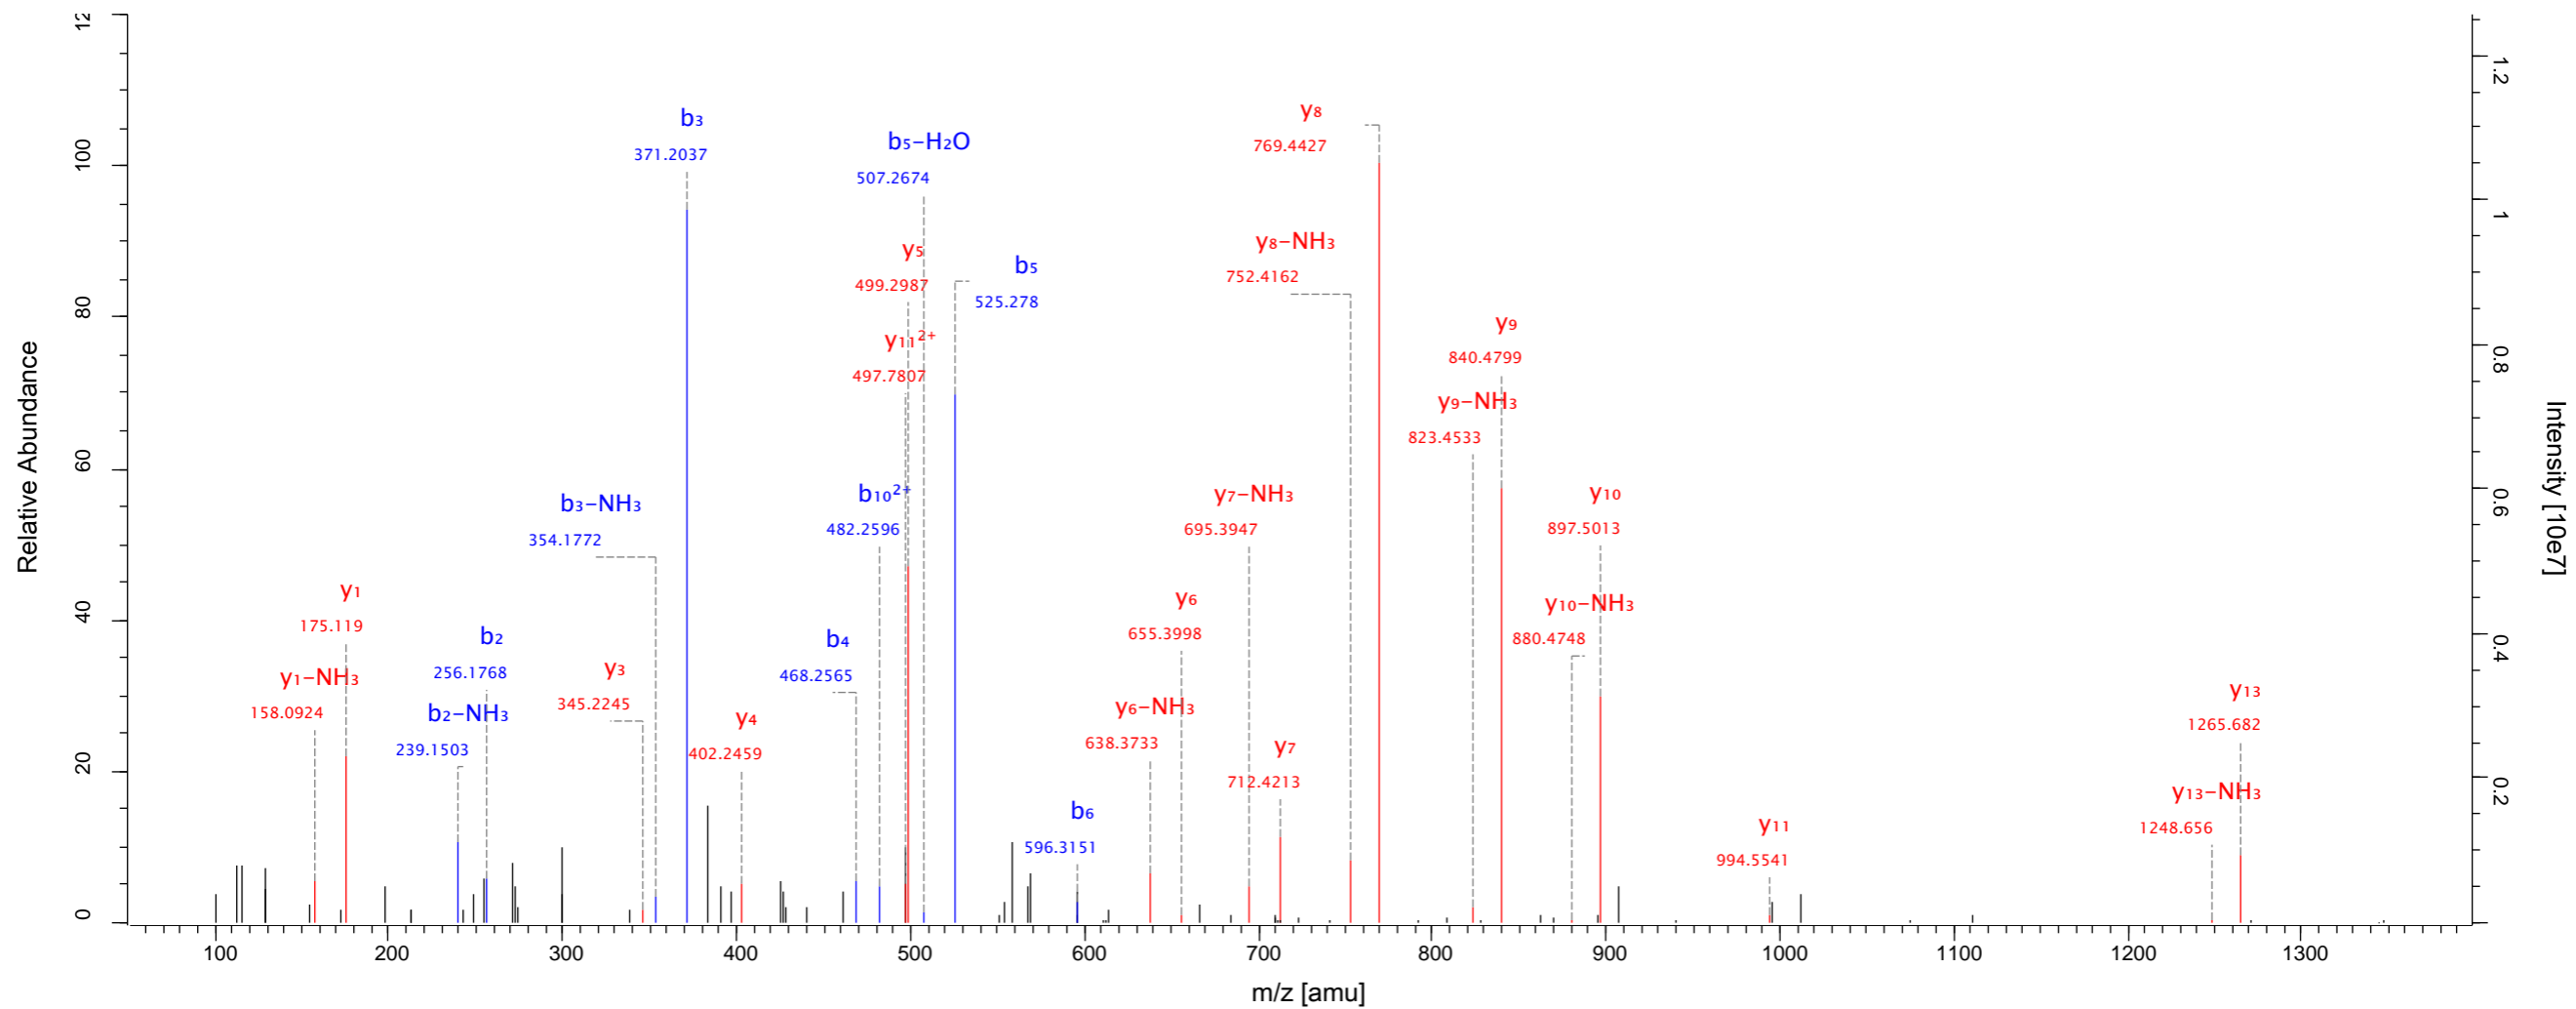

Raw file: 20111212\_EXQ5\_AnMi\_QC\_HCMVp11\_14

Scan number: 9685

Protein: ORFL321W + NC\_006273.2[191968,194126]+ <unknown description>; ORFL321W.iORF1 + NC\_006273.2[191968,194126]+ <unknown description>; ORFL321W.iORF4 + NC\_006273.2[193200,194126]+ <unknown description>

Peptide score: 99.53

Method: FTMS; HCD

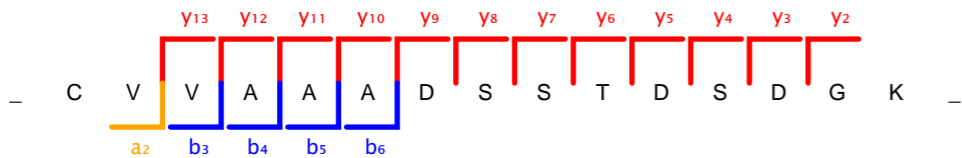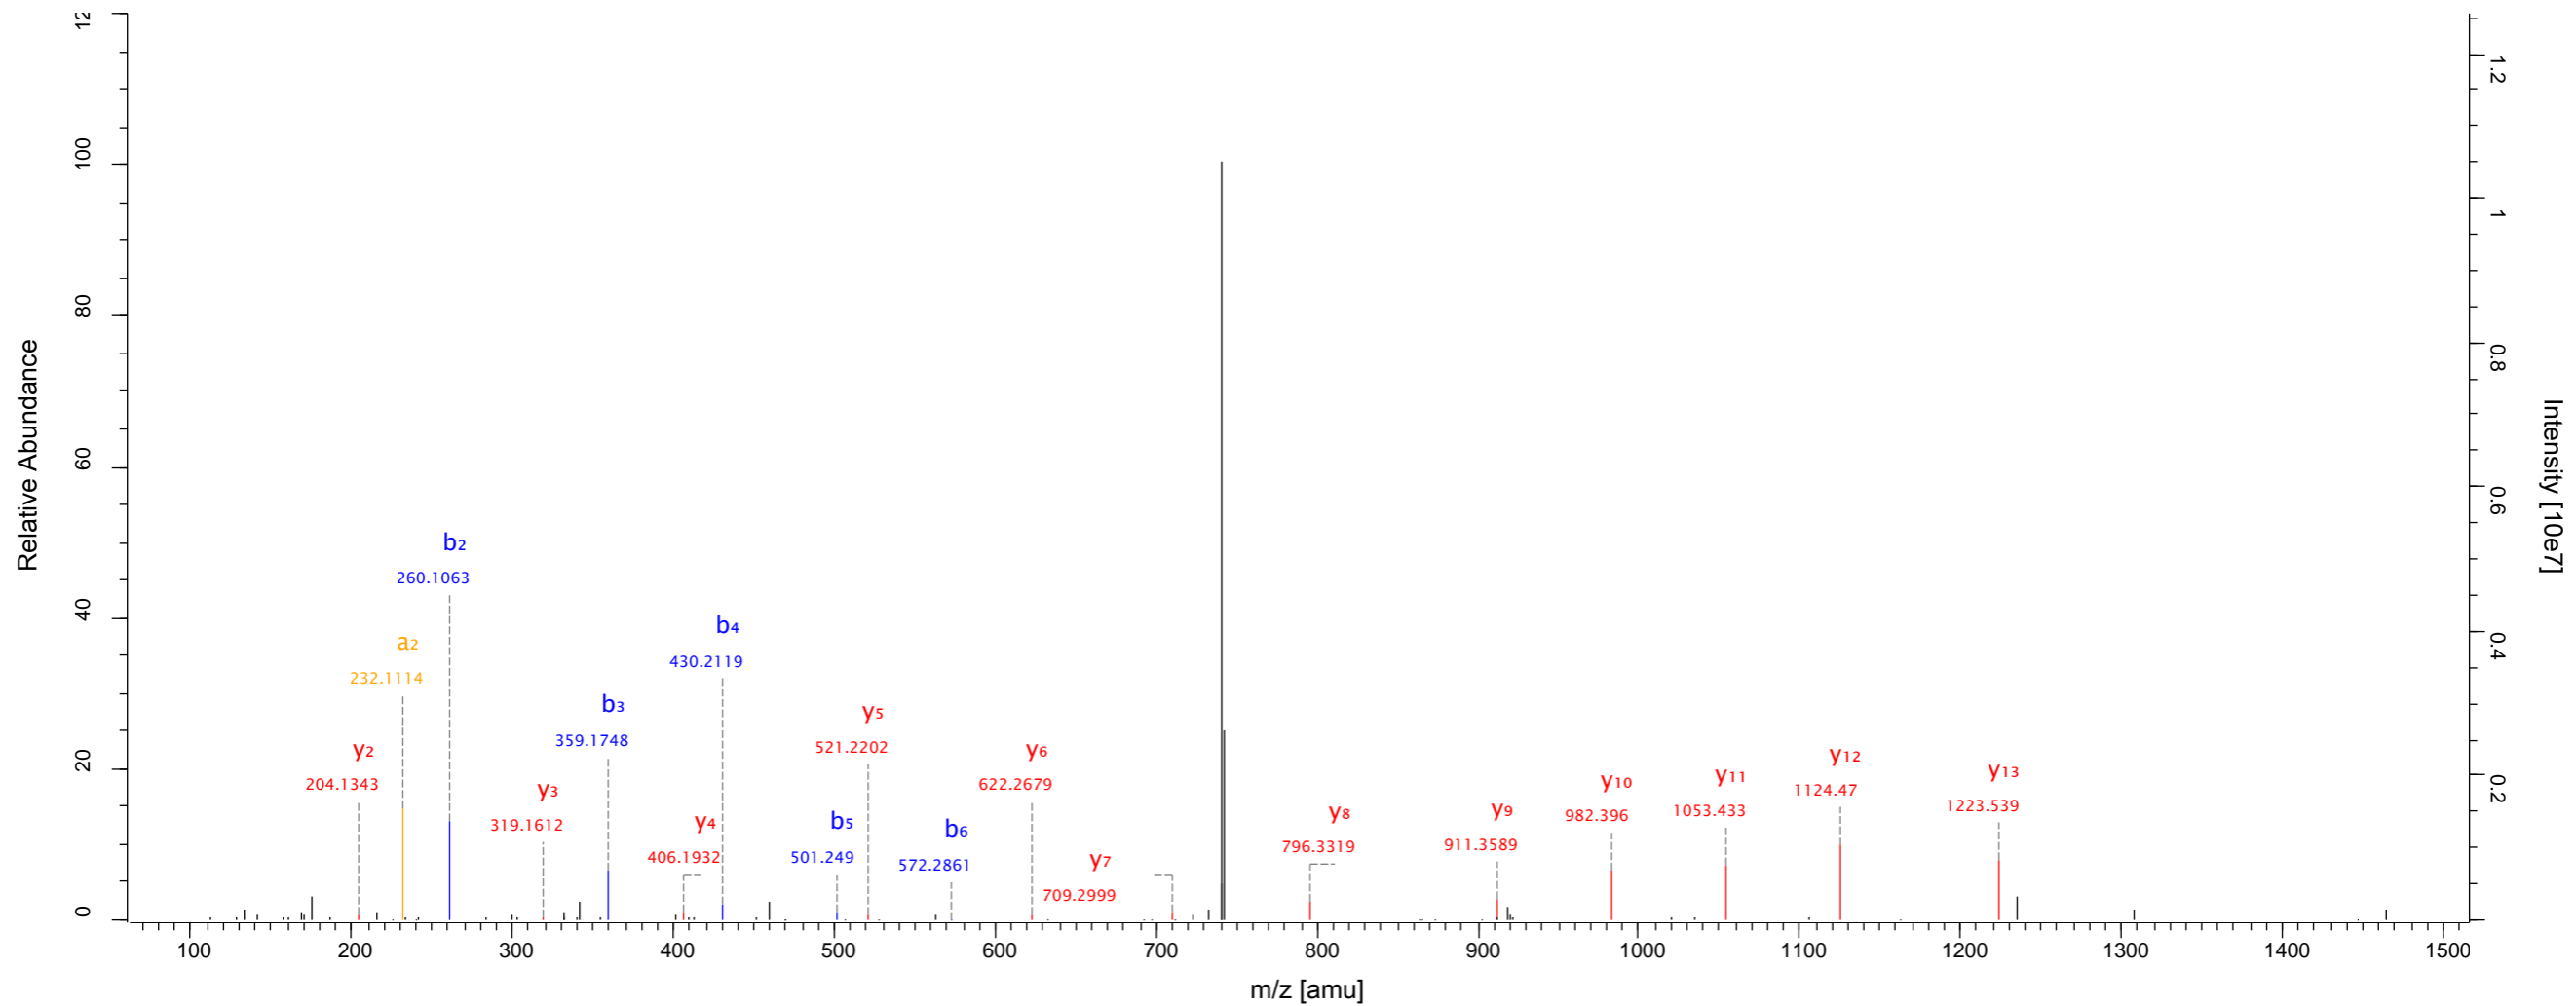

Raw file: 20111212\_EXQ5\_AnMi\_QC\_HCMVp1\_15  
Scan number: 11201  
Protein: ORFL147C - NC\_006273.2[85932,87362]- <unknown description>  
Peptide score: 130.66  
Method: FTMS; HCD

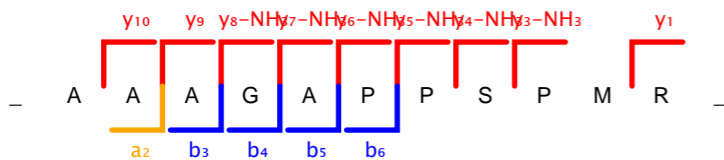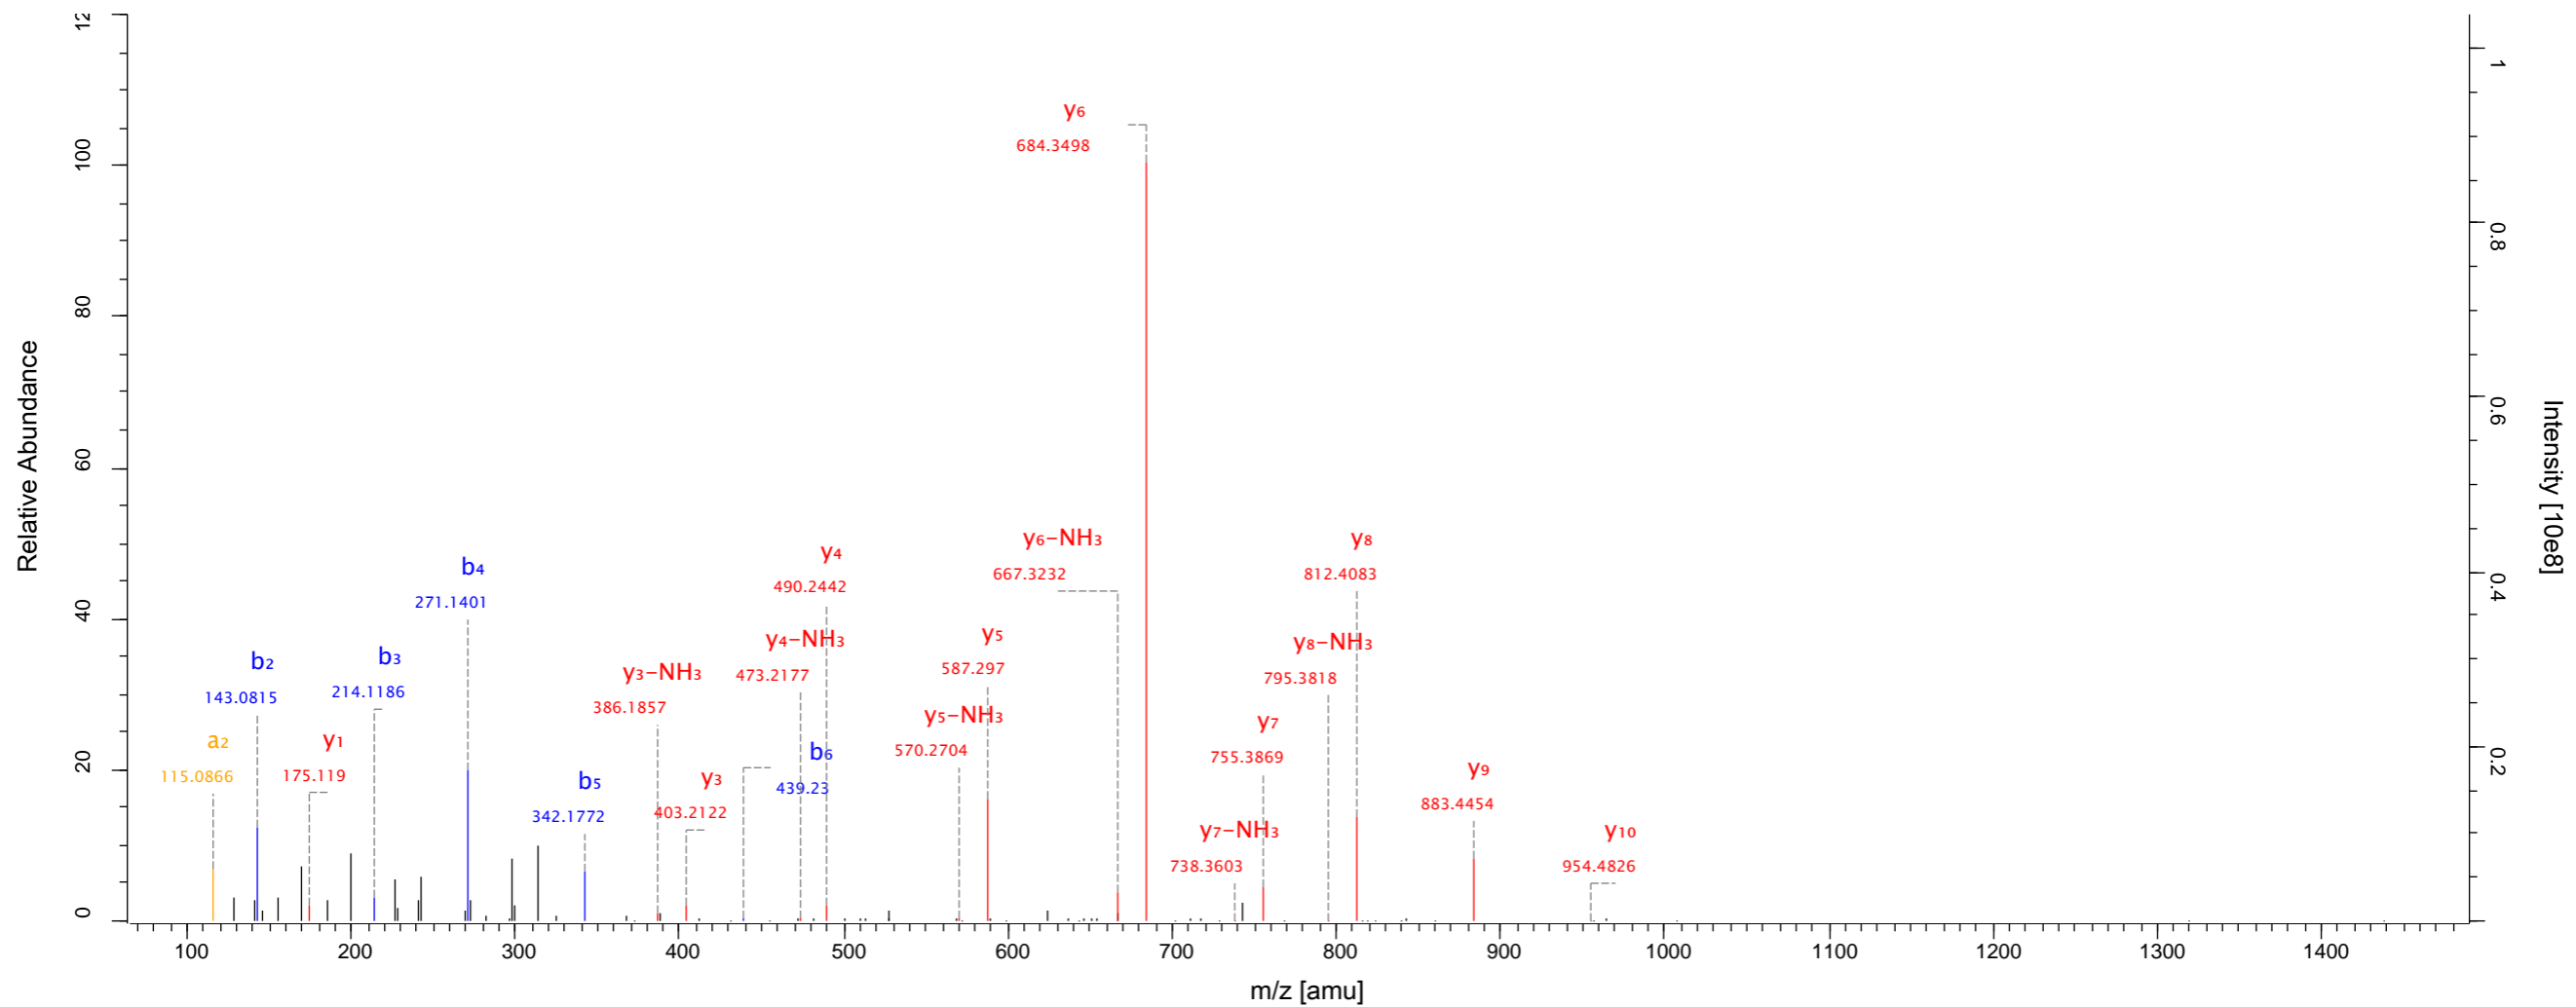

Raw file: 20111212\_EXQ5\_AnMi\_QC\_HCMVp1\_15  
Scan number: 22097  
Protein: ORFL147C - NC\_006273.2[85932,87362]- <unknown description>  
Peptide score: 130.27  
Method: FTMS; HCD

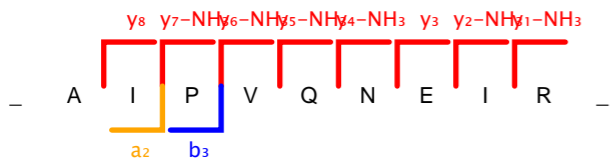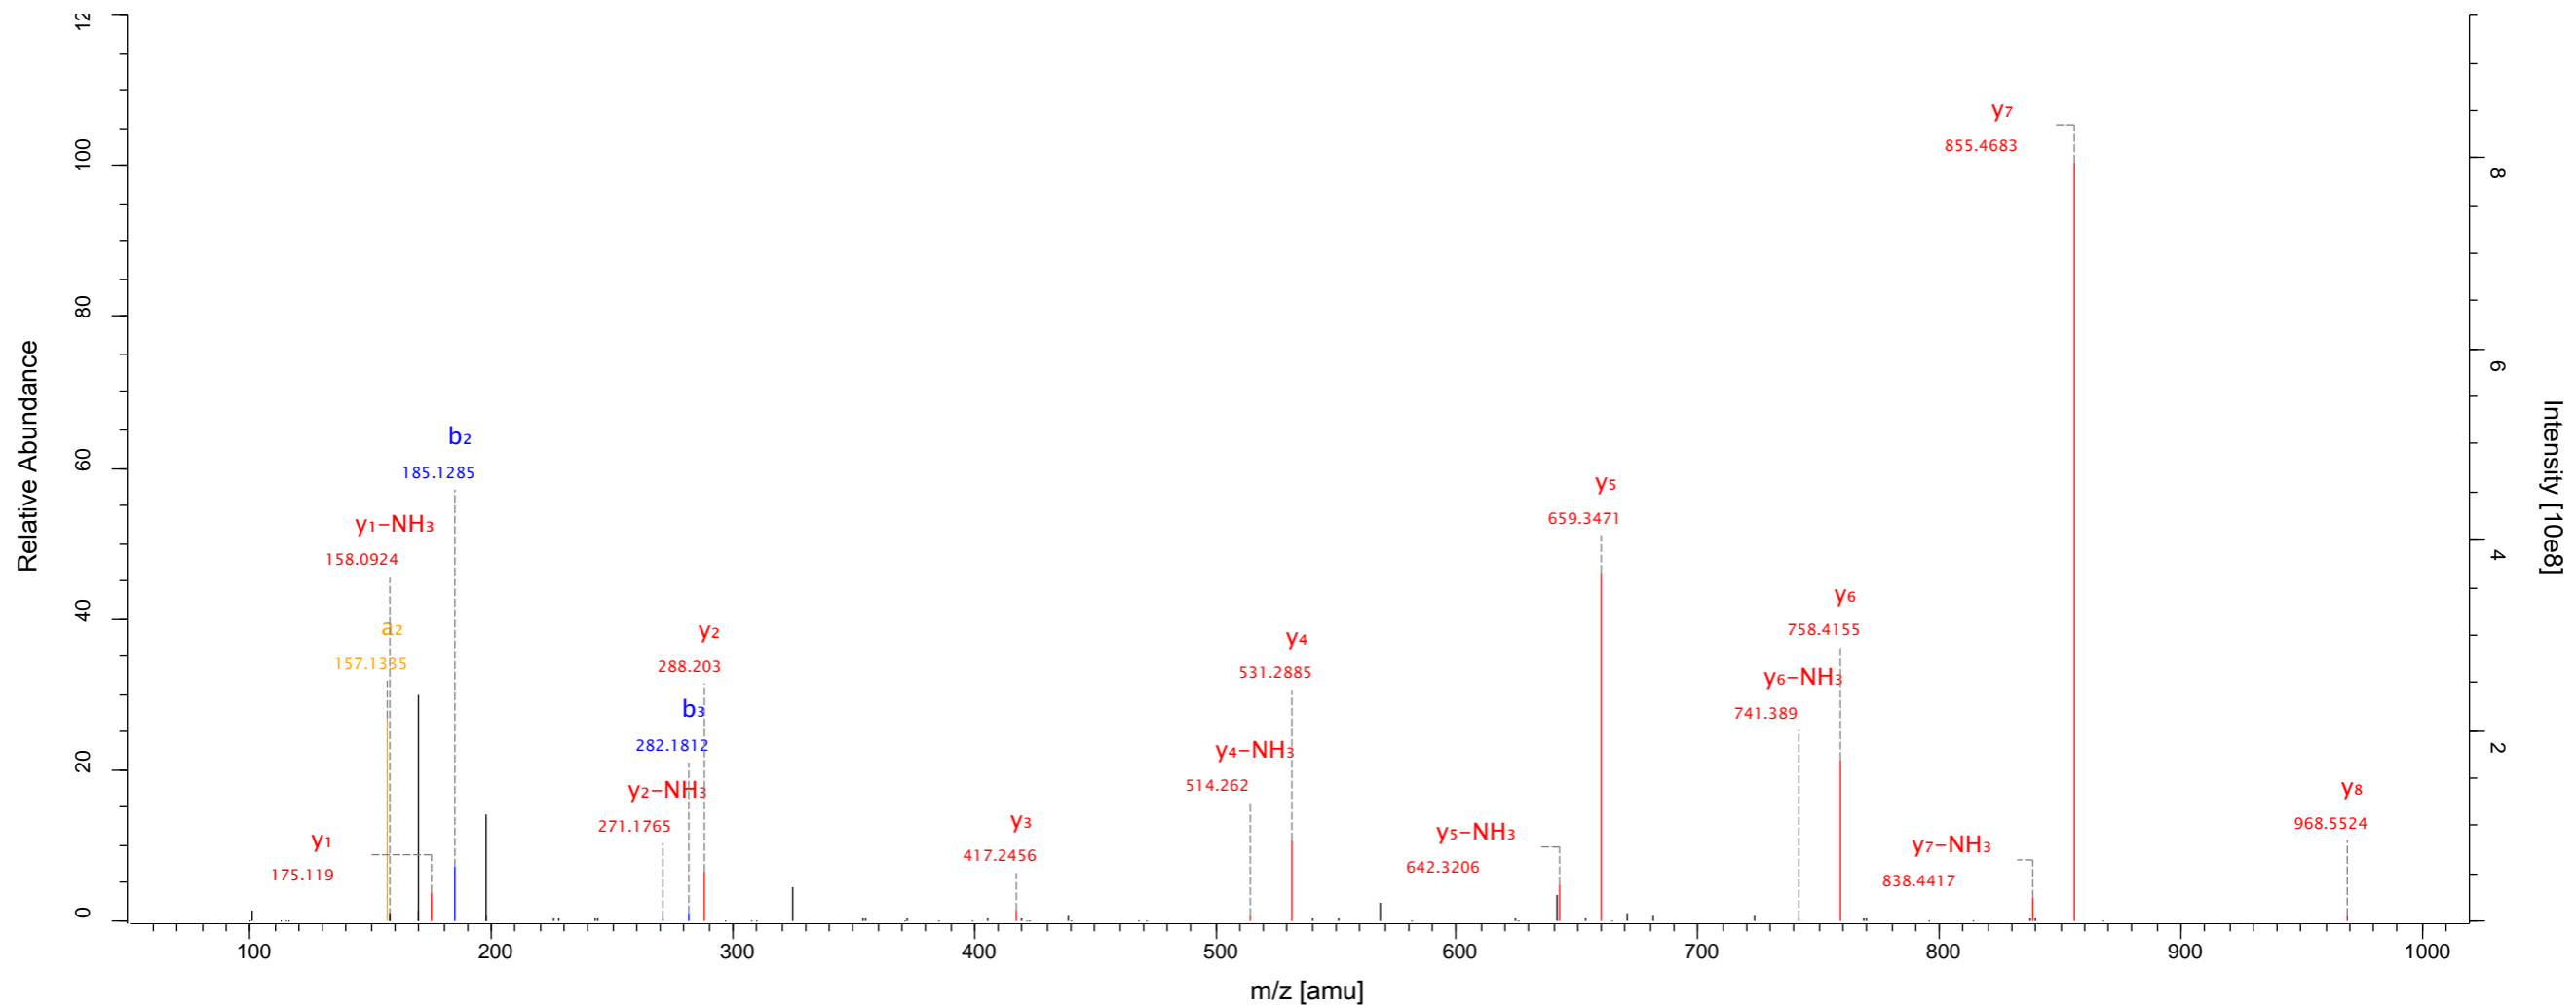

Raw file: 20111212\_EXQ5\_AnMi\_QC\_HCMVp1\_15  
Scan number: 5033  
Protein: ORFL147C - NC\_006273.2[85932,87362]- <unknown description>  
Peptide score: 89.05  
Method: FTMS; HCD

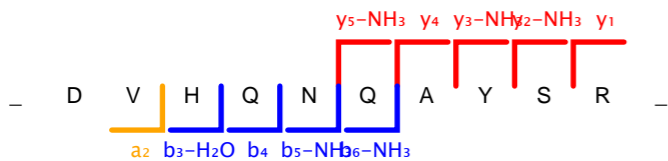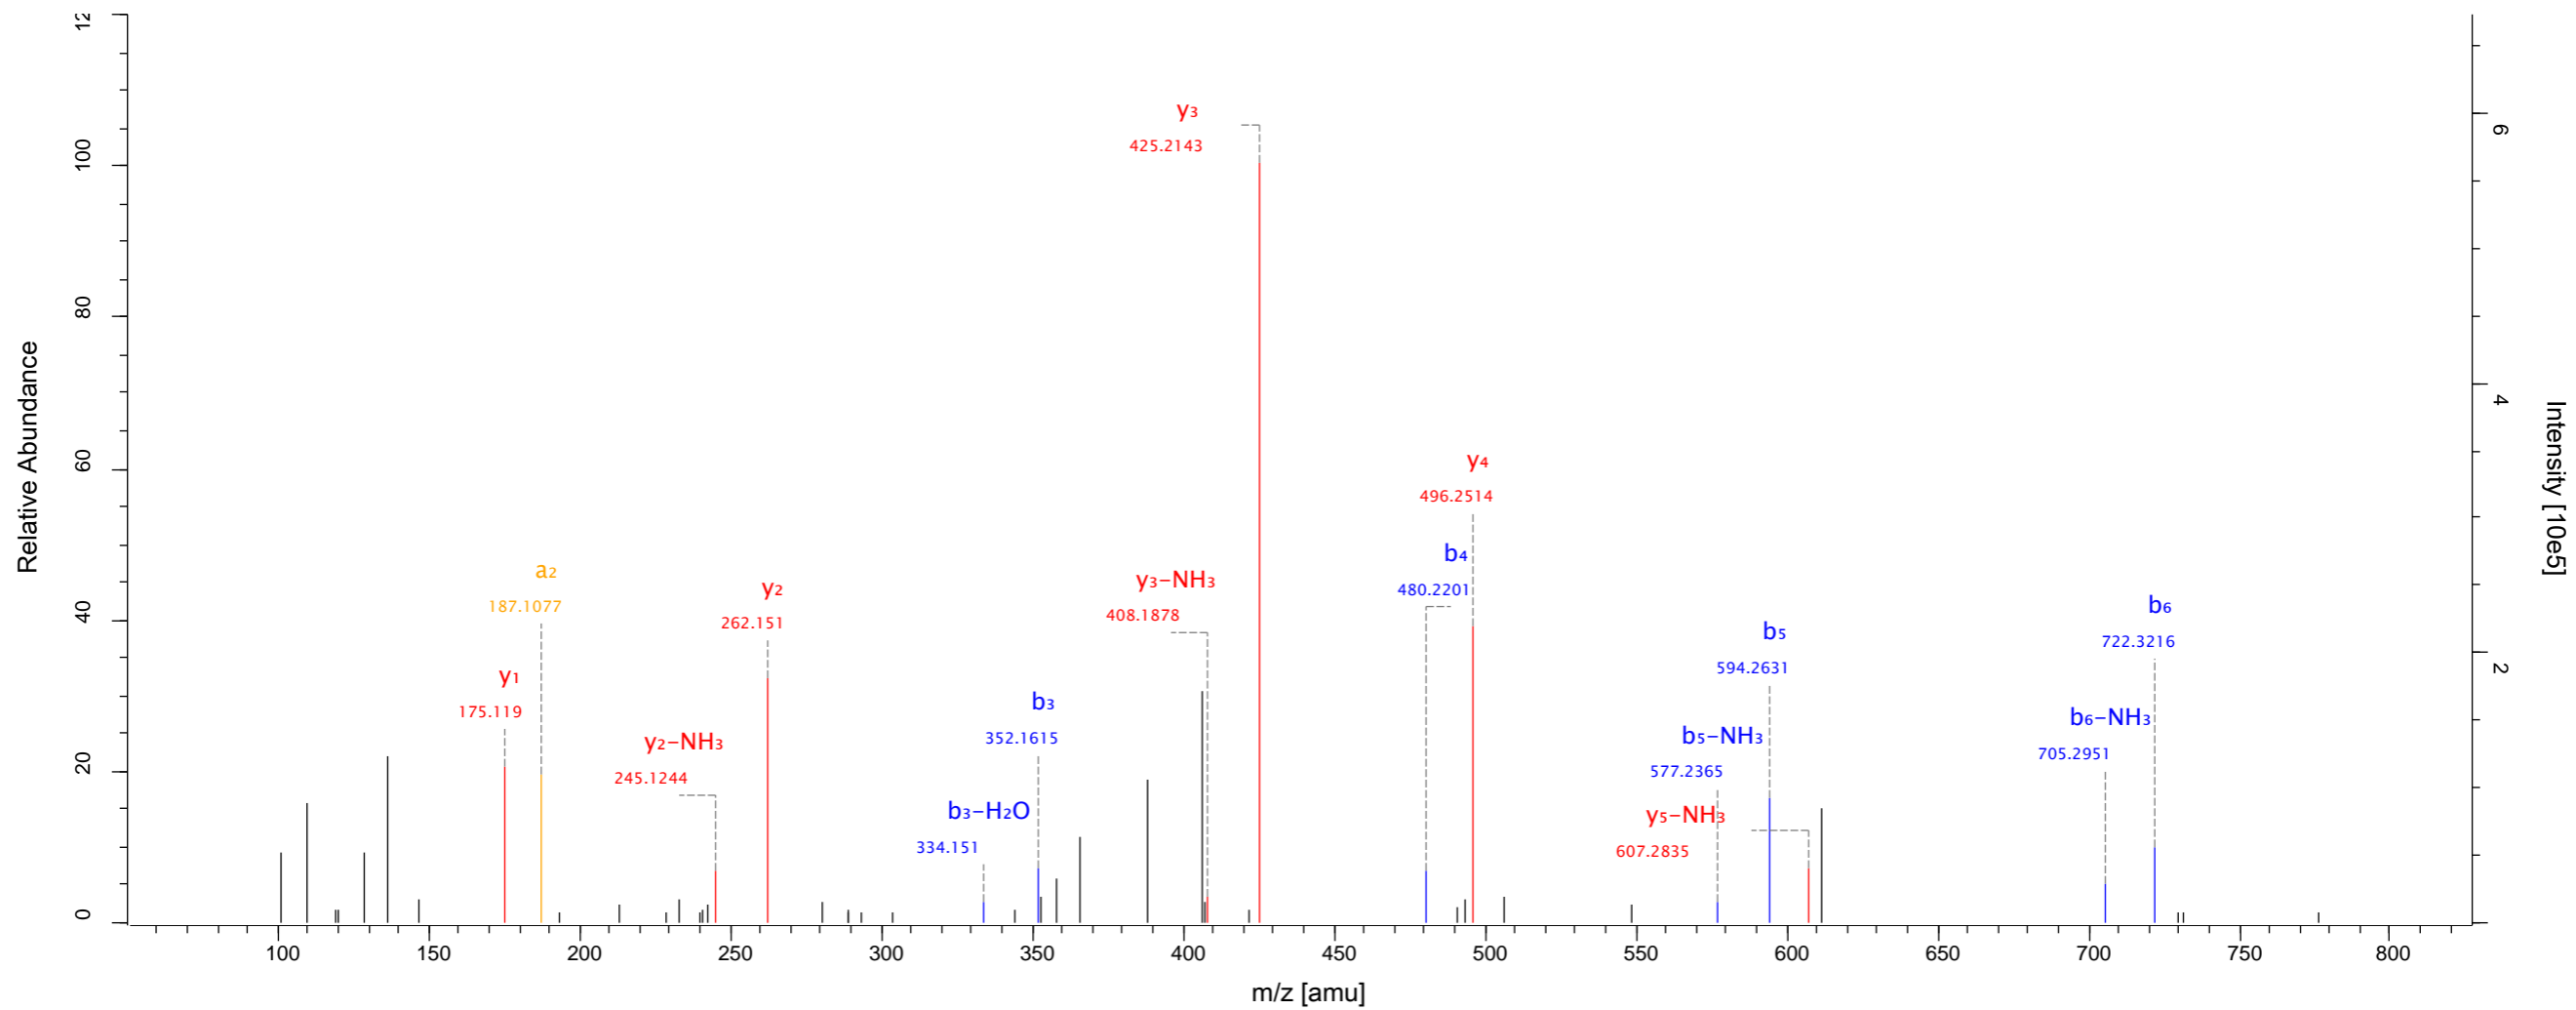

Raw file: 20111212\_EXQ5\_AnMi\_QC\_HCMVp1\_15  
 Scan number: 5387  
 Protein: ORFL147C - NC\_006273.2[85932,87362]- <unknown description>  
 Peptide score: 167.12  
 Method: FTMS; HCD

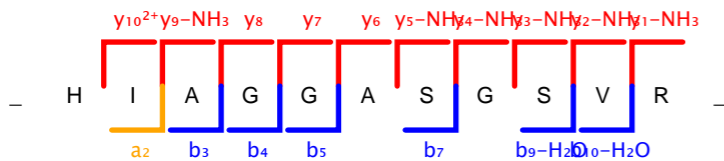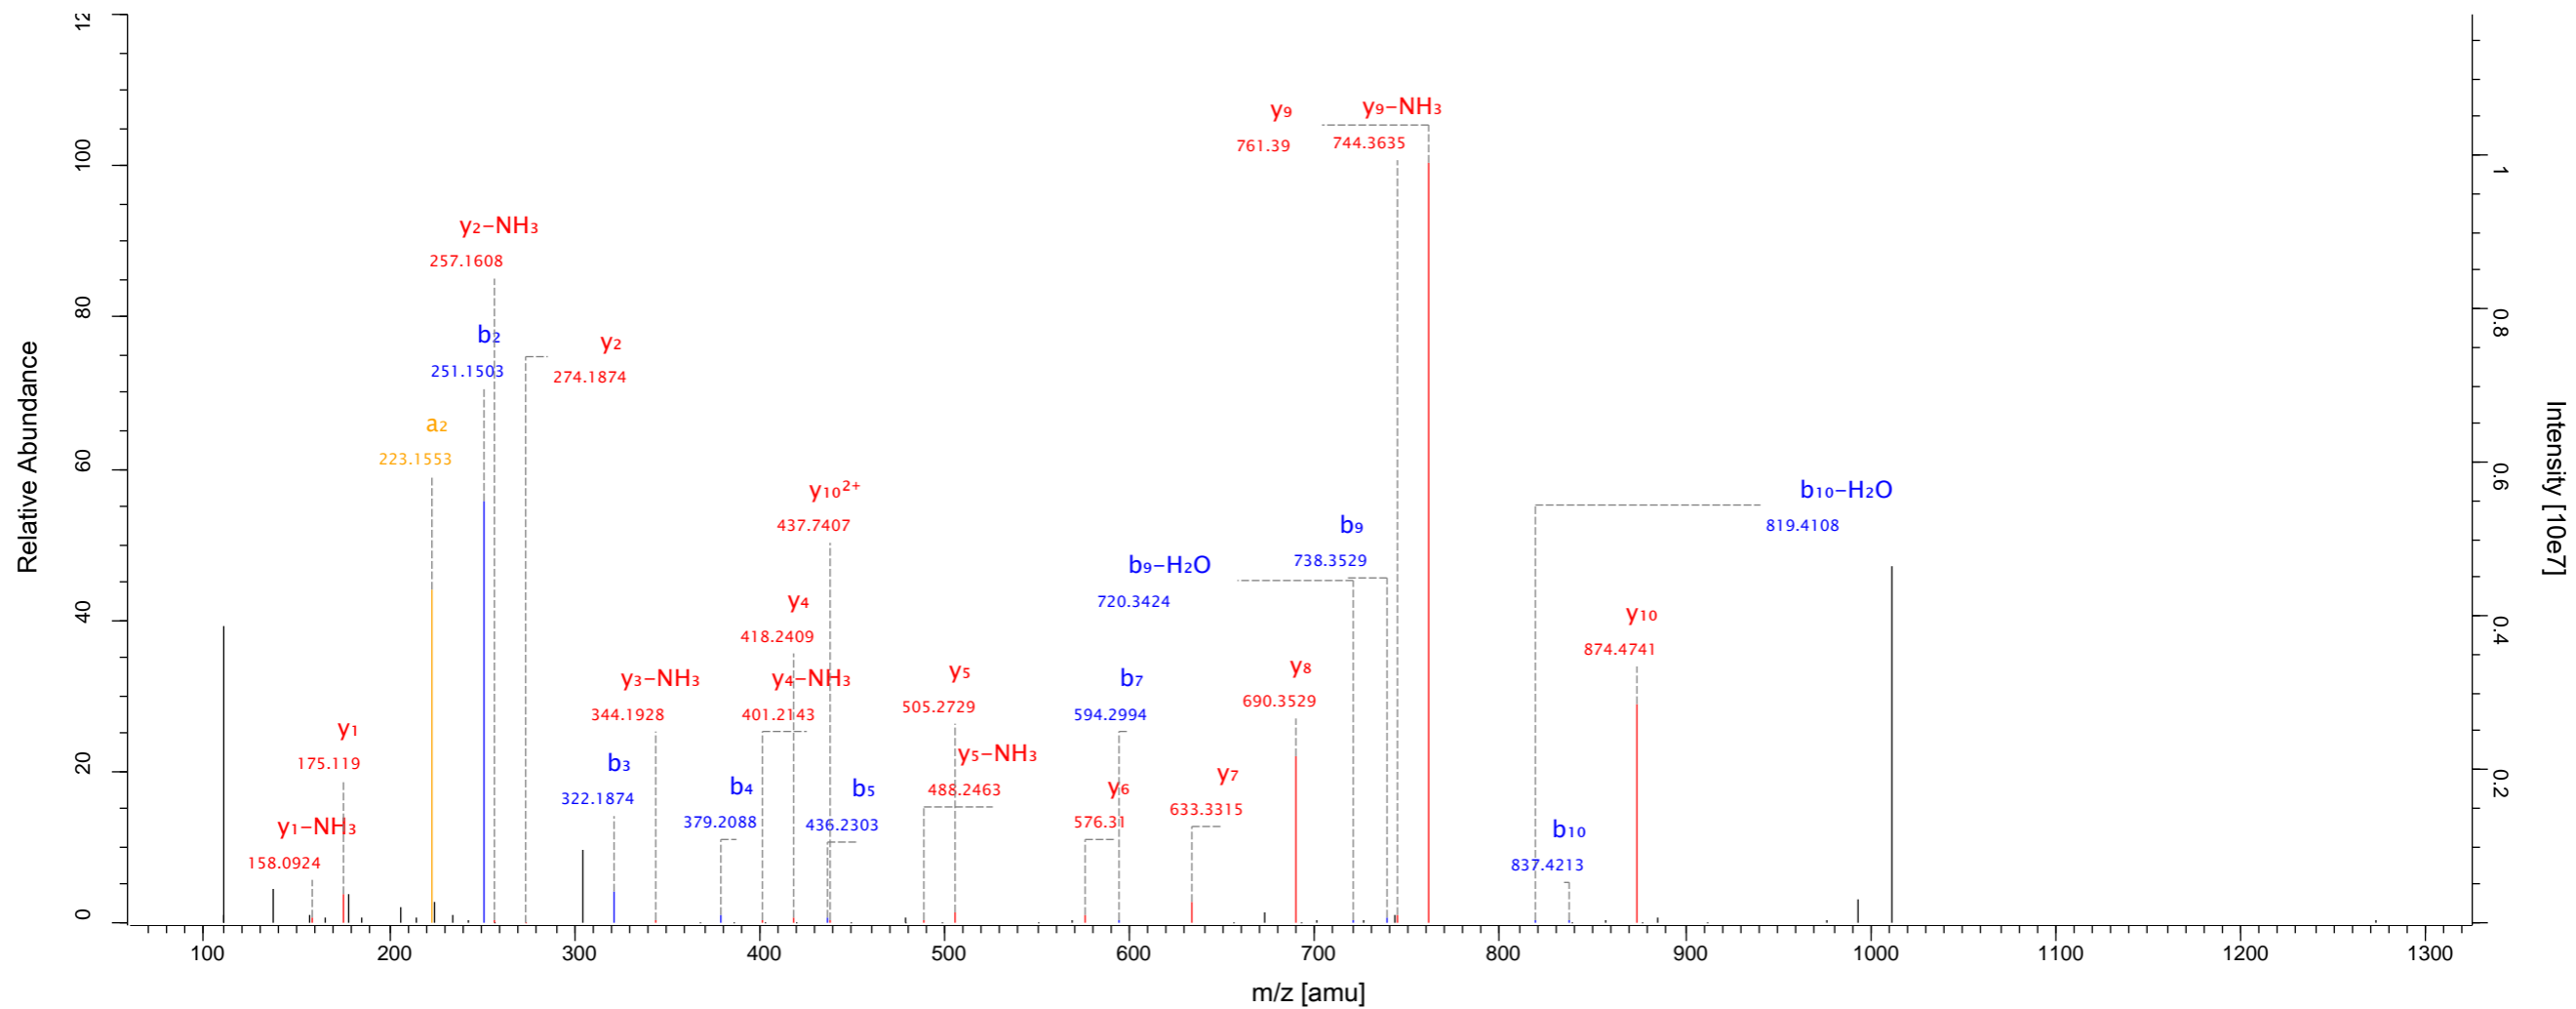



Raw file: 20111212\_EXQ5\_AnMi\_QC\_HCMVp1\_15  
Scan number: 6241  
Protein: ORFL147C - NC\_006273.2[85932,87362]- <unknown description>  
Peptide score: 140.3  
Method: FTMS; HCD

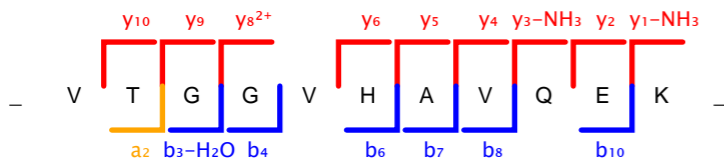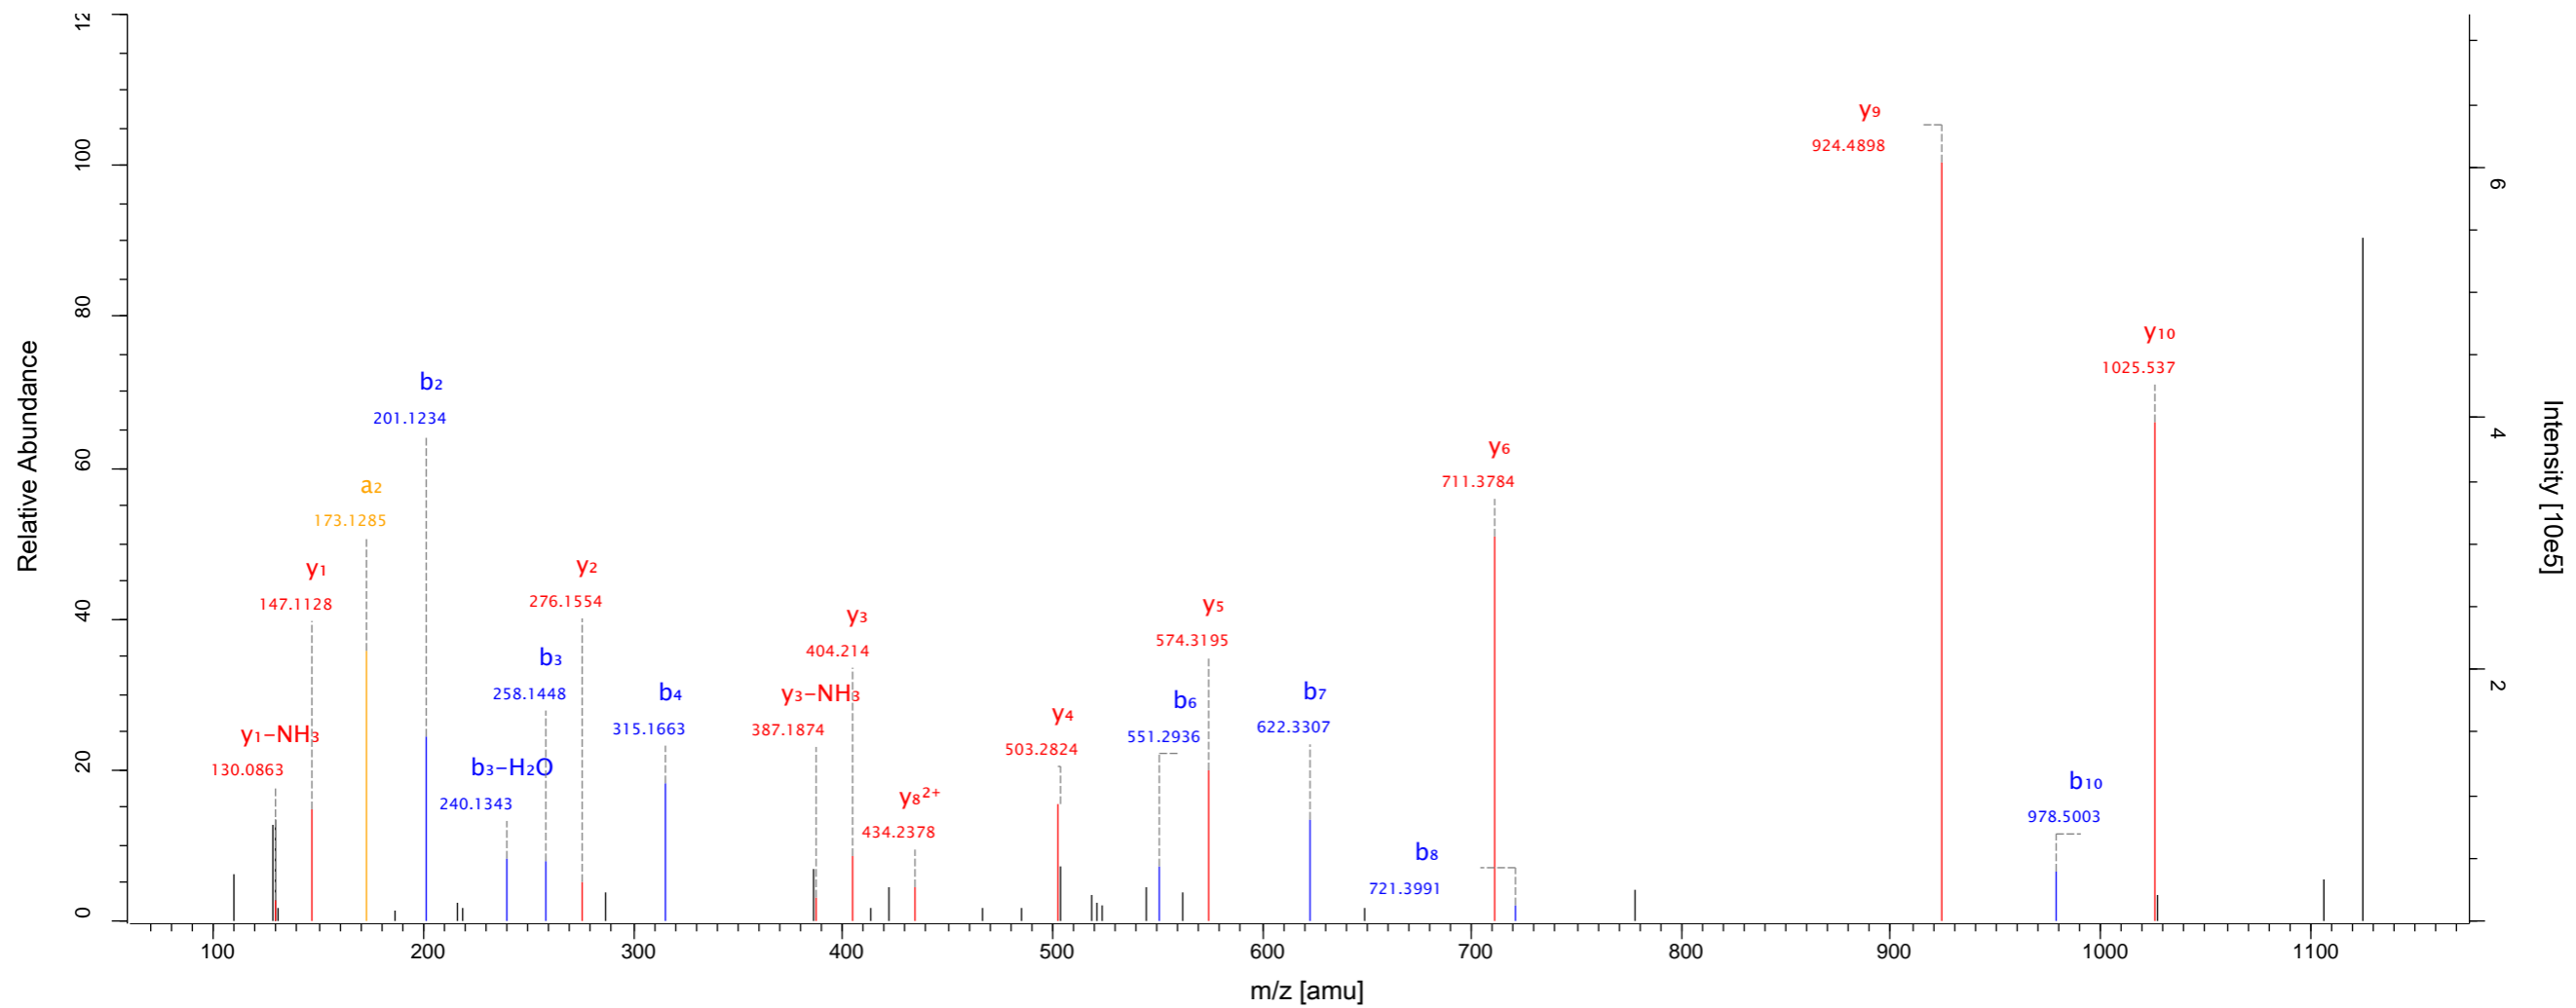

Raw file: 20111212\_EXQ5\_AnMi\_QC\_HCMVp11\_18  
Scan number: 10129  
Protein: ORFL106C - NC\_006273.2[53935,54294]- <unknown description>  
Peptide score: 78.26  
Method: FTMS; HCD

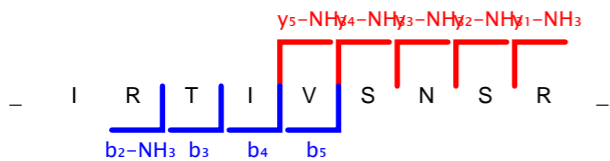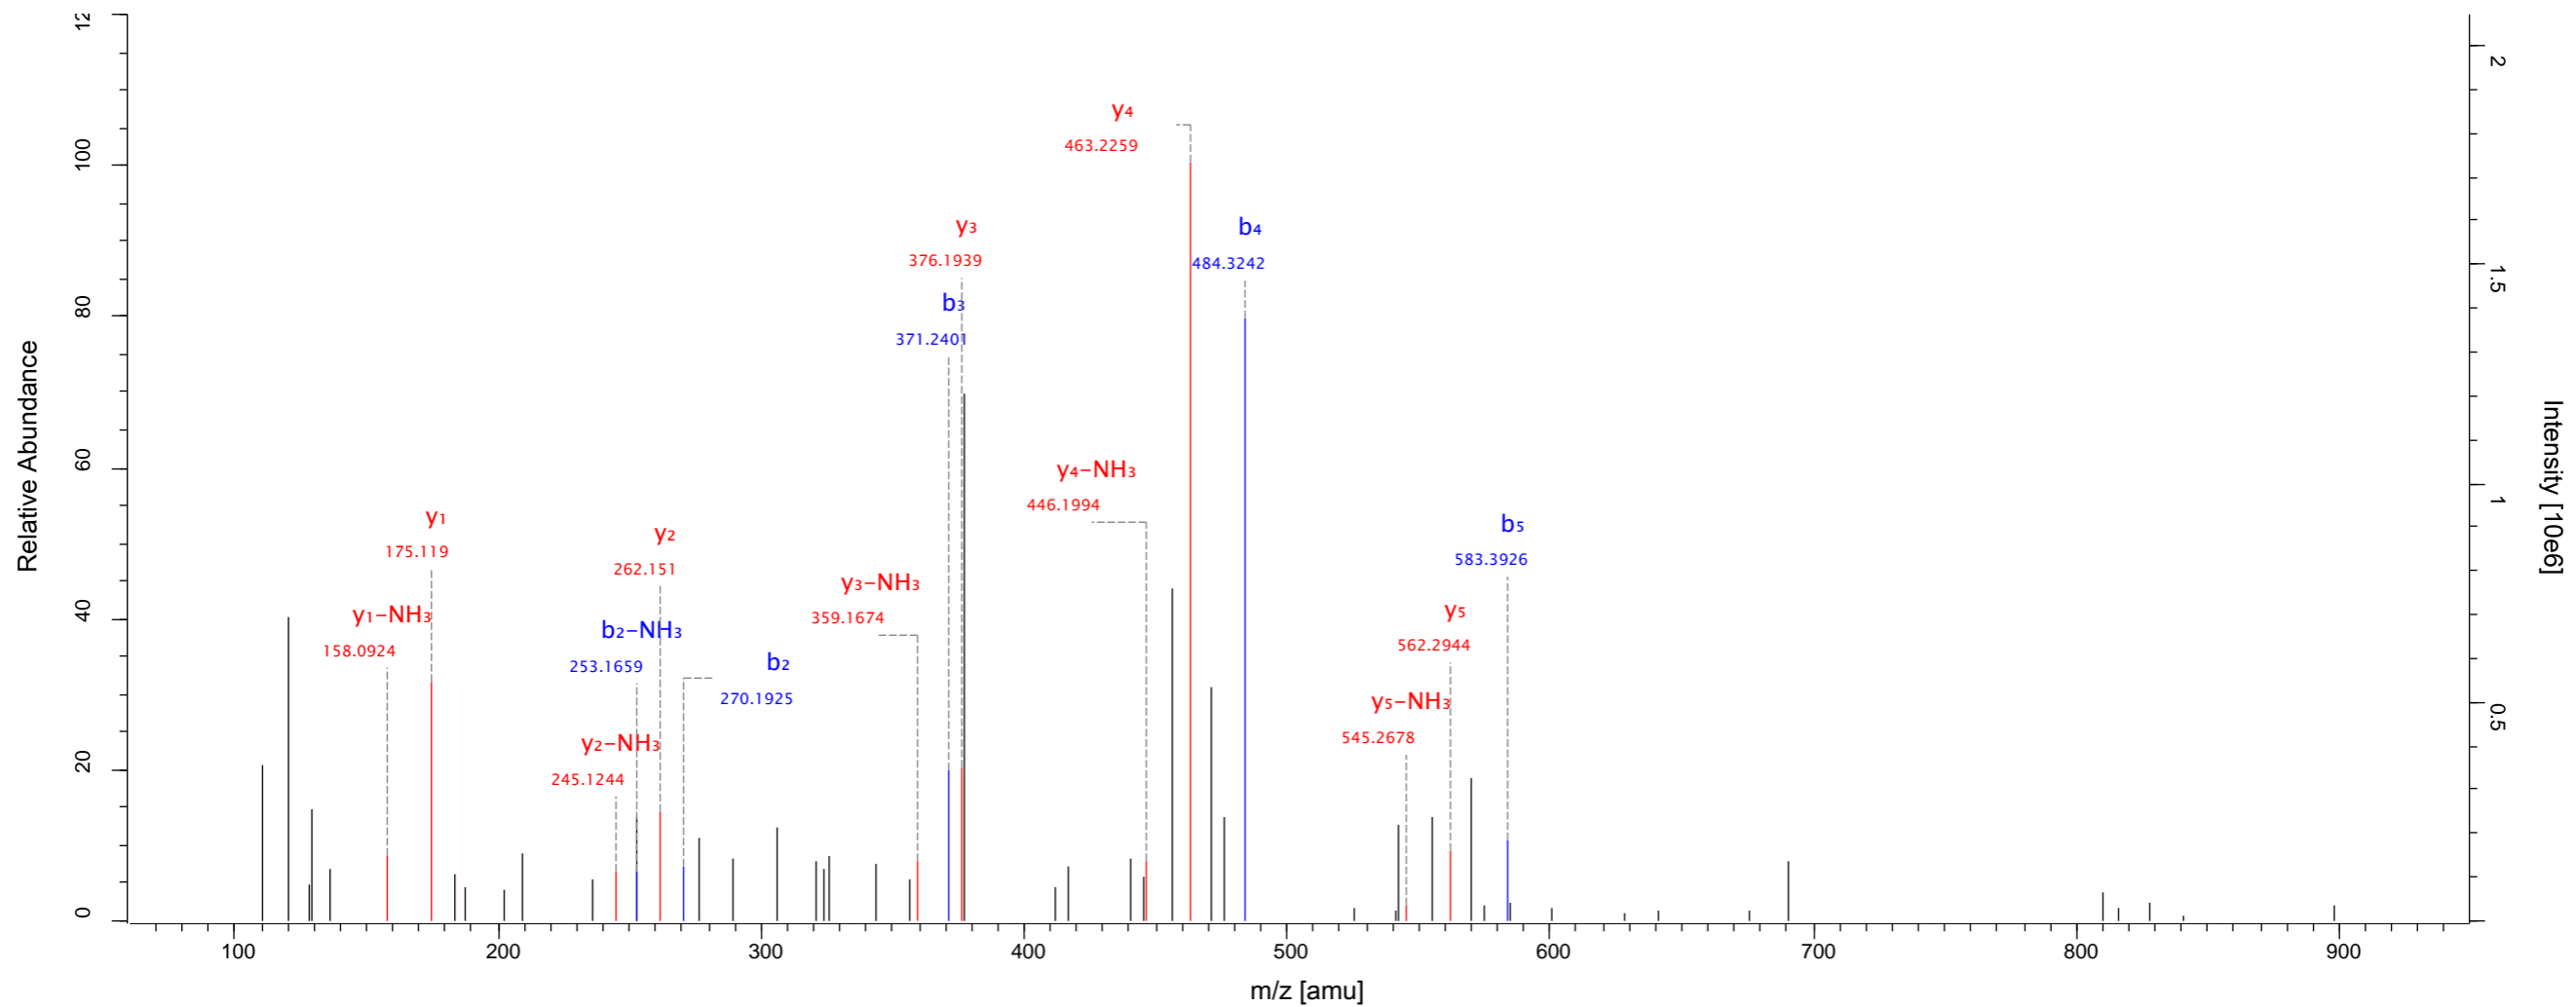

Raw file: 20111212\_EXQ5\_AnMi\_QC\_HCMVp1\_18  
Scan number: 10823  
Protein: ORFS343C.iORF1 - NC\_006273.2[210869,211213]- <unknown description>  
Peptide score: 87.91  
Method: FTMS; HCD

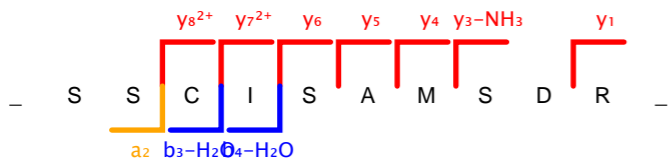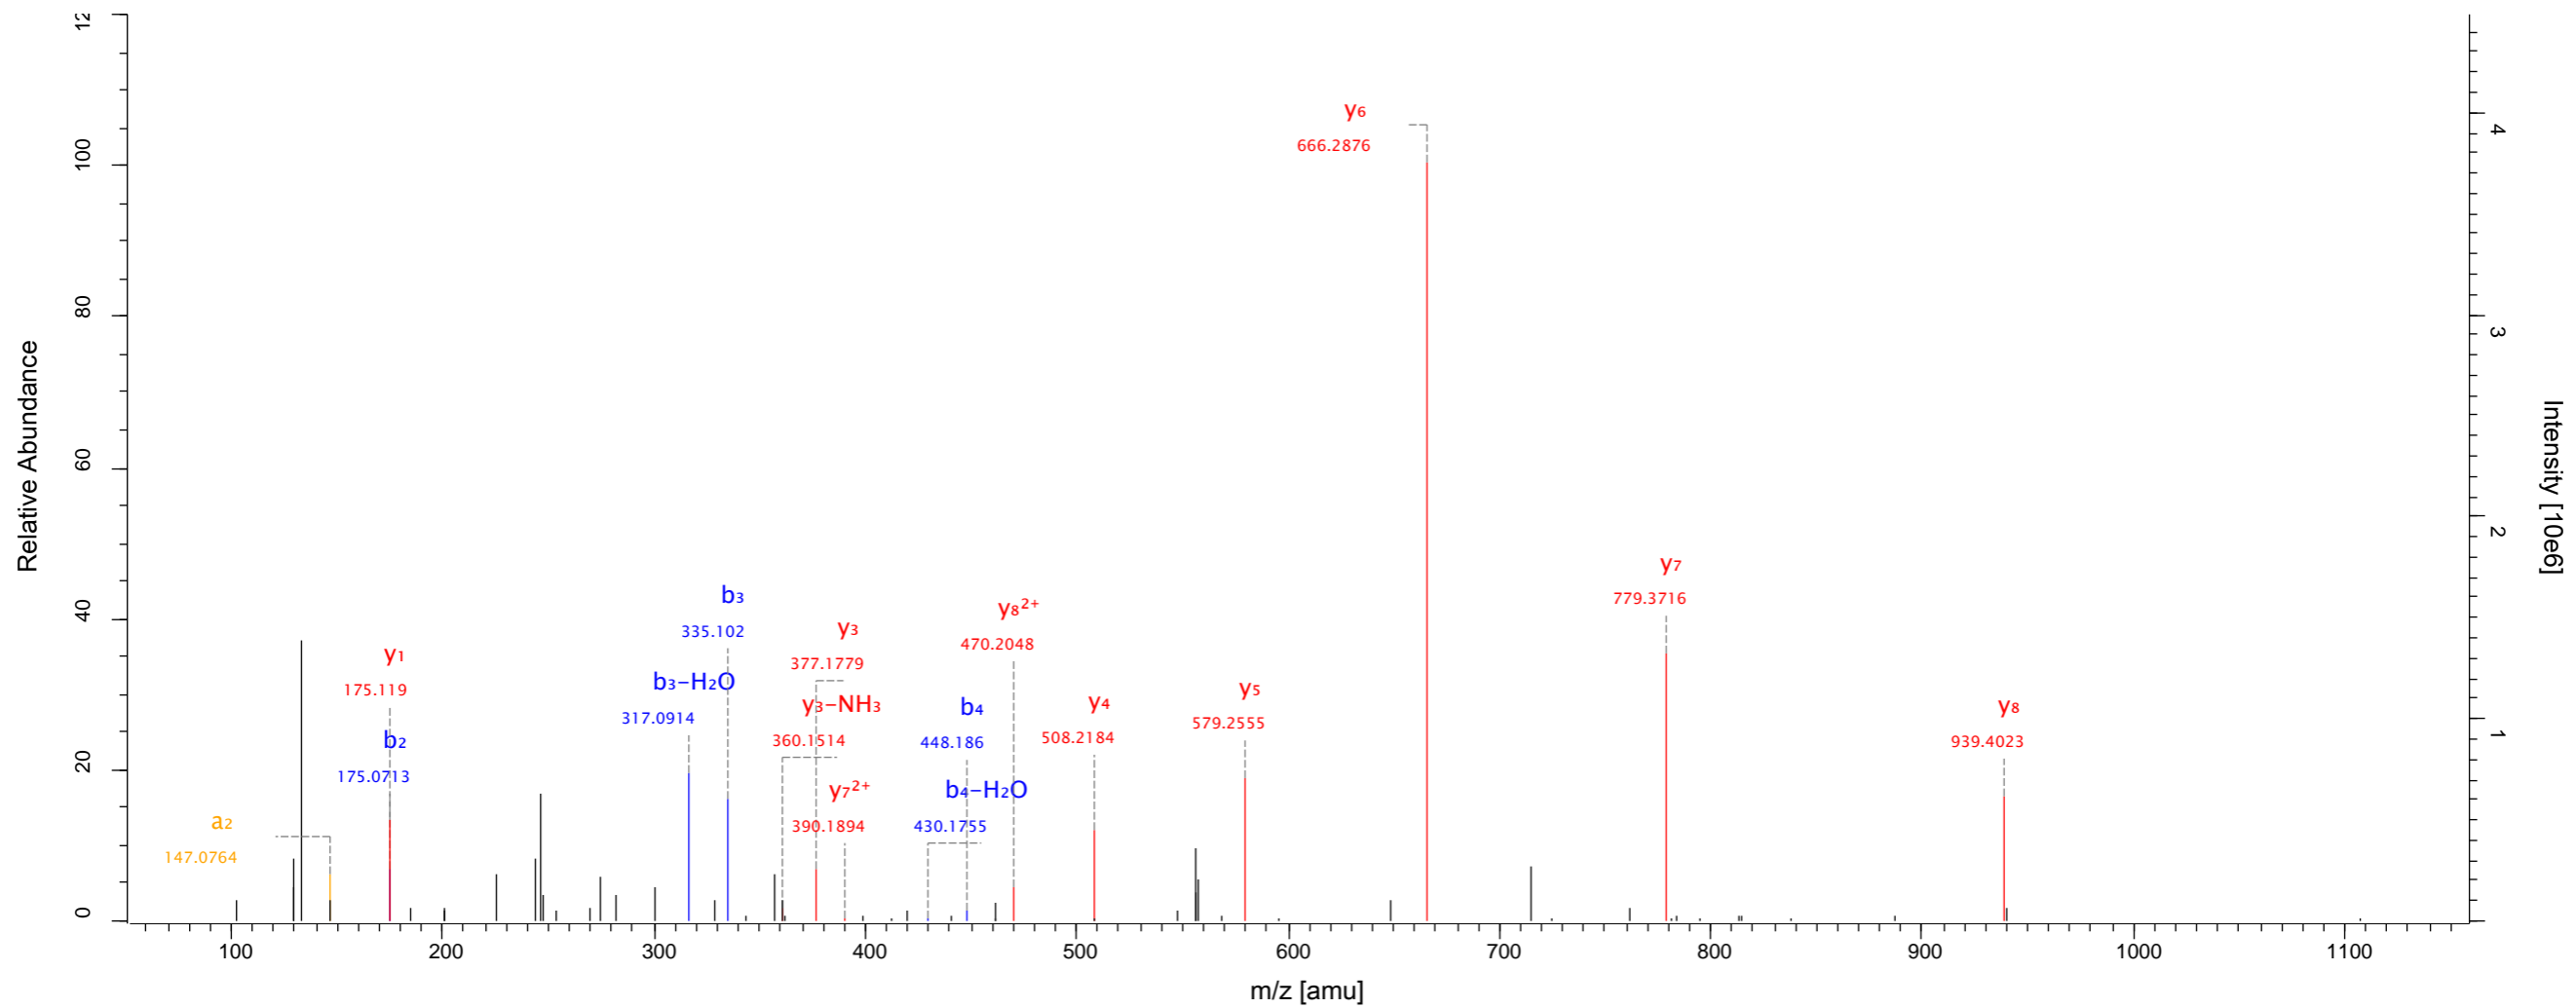

Raw file: 20111212\_EXQ5\_AnMi\_QC\_HCMVp1\_18  
Scan number: 11007  
Protein: ORFL235W + NC\_006273.2[149239,150022]+ <unknown description>  
Peptide score: 100.55  
Method: FTMS; HCD

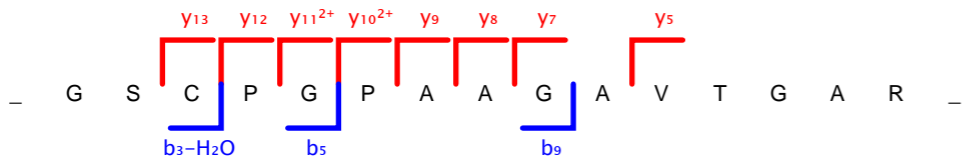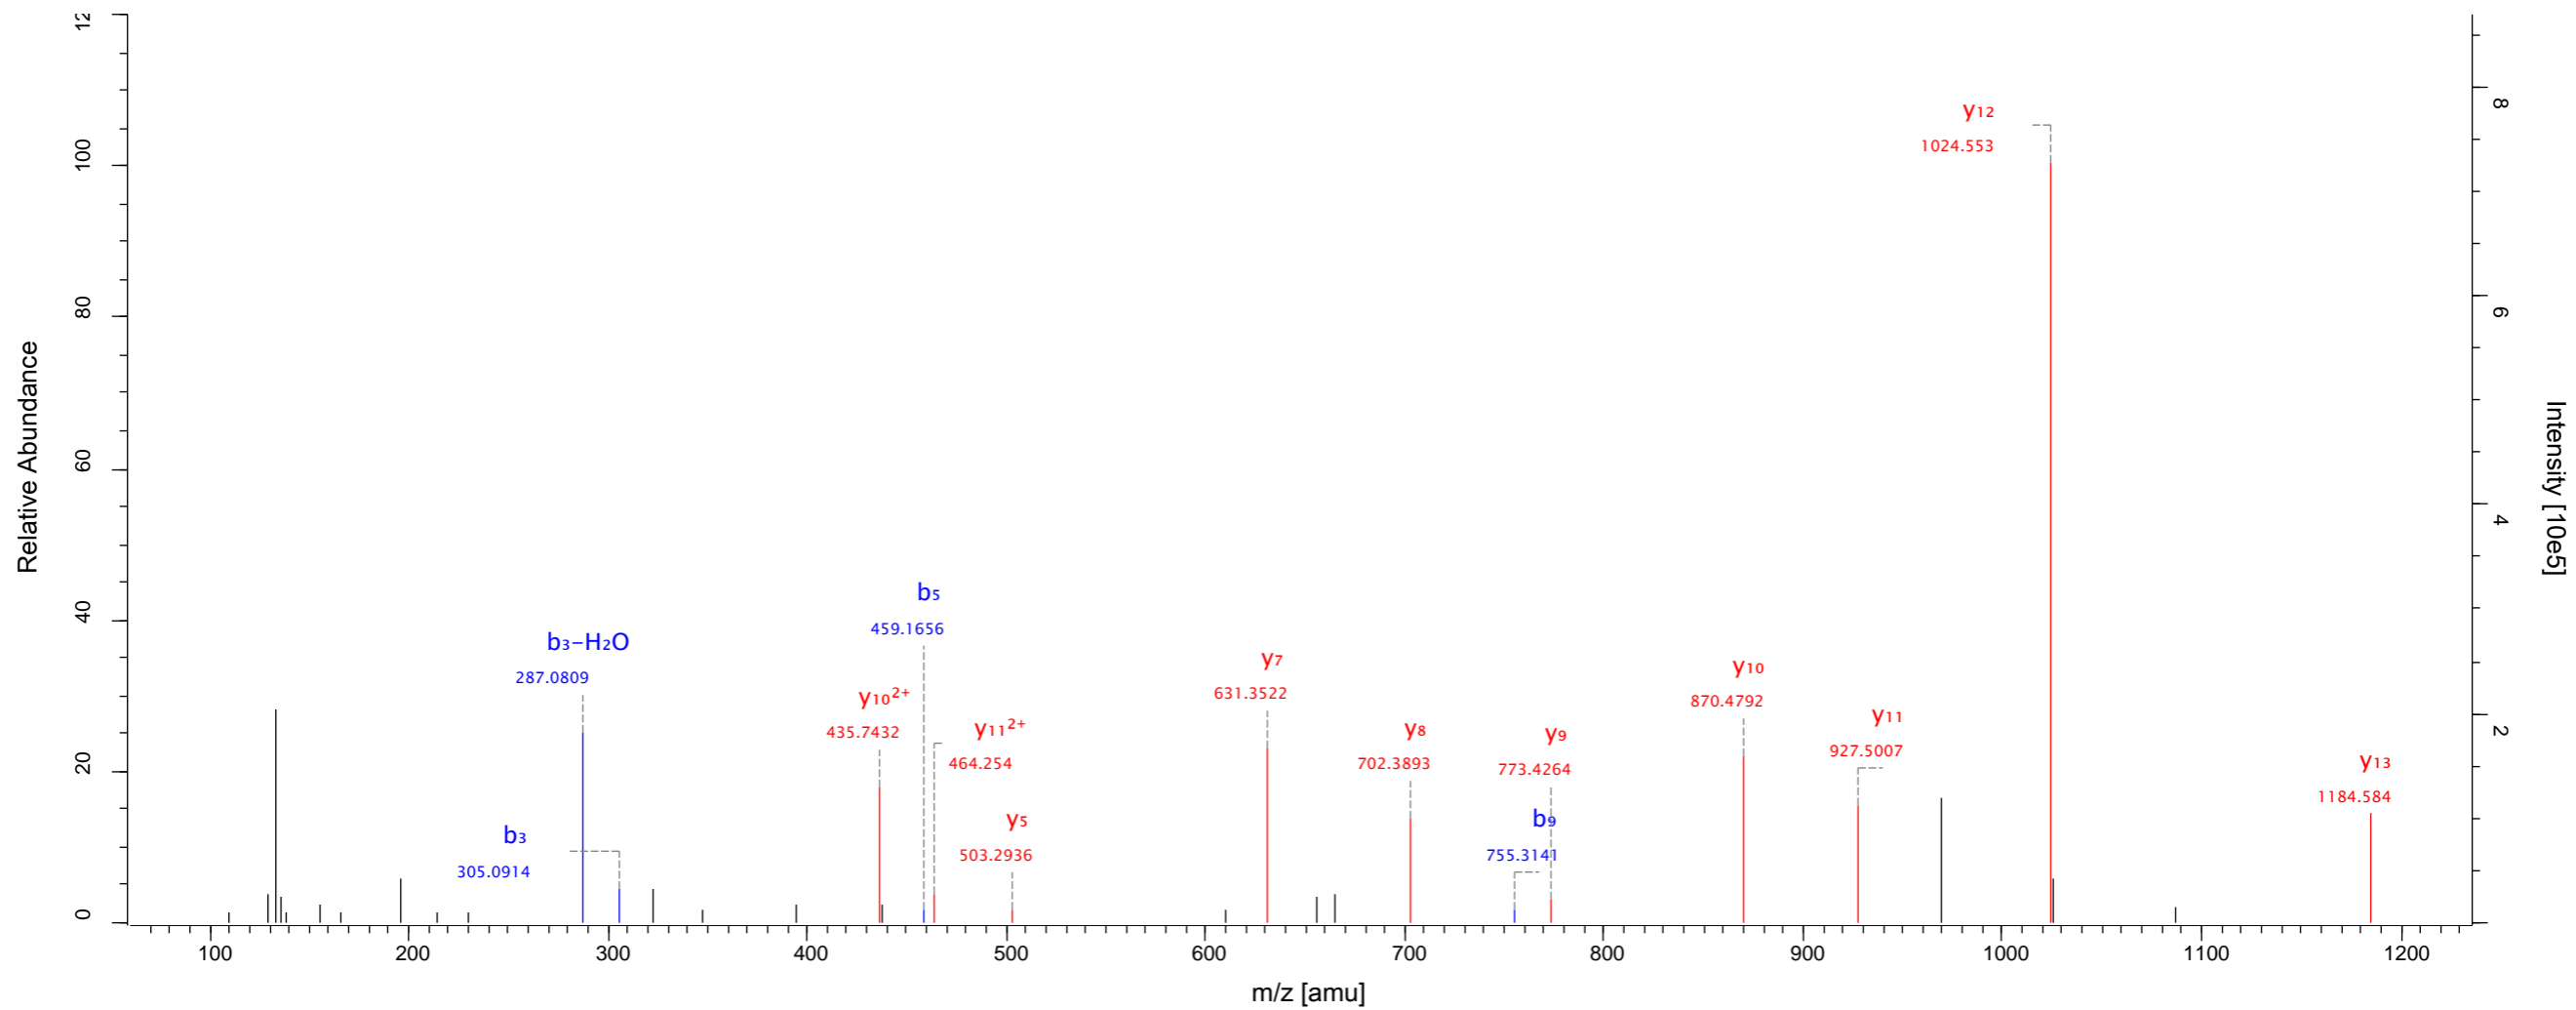

Raw file: 20111212\_EXQ5\_AnMi\_QC\_HCMVp1\_18  
Scan number: 11044  
Protein: ORFL299W + NC\_006273.2[185047,185685]+ <unknown description>  
Peptide score: 122.13  
Method: FTMS; HCD

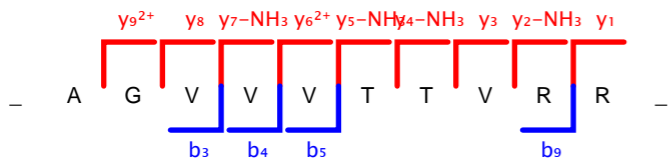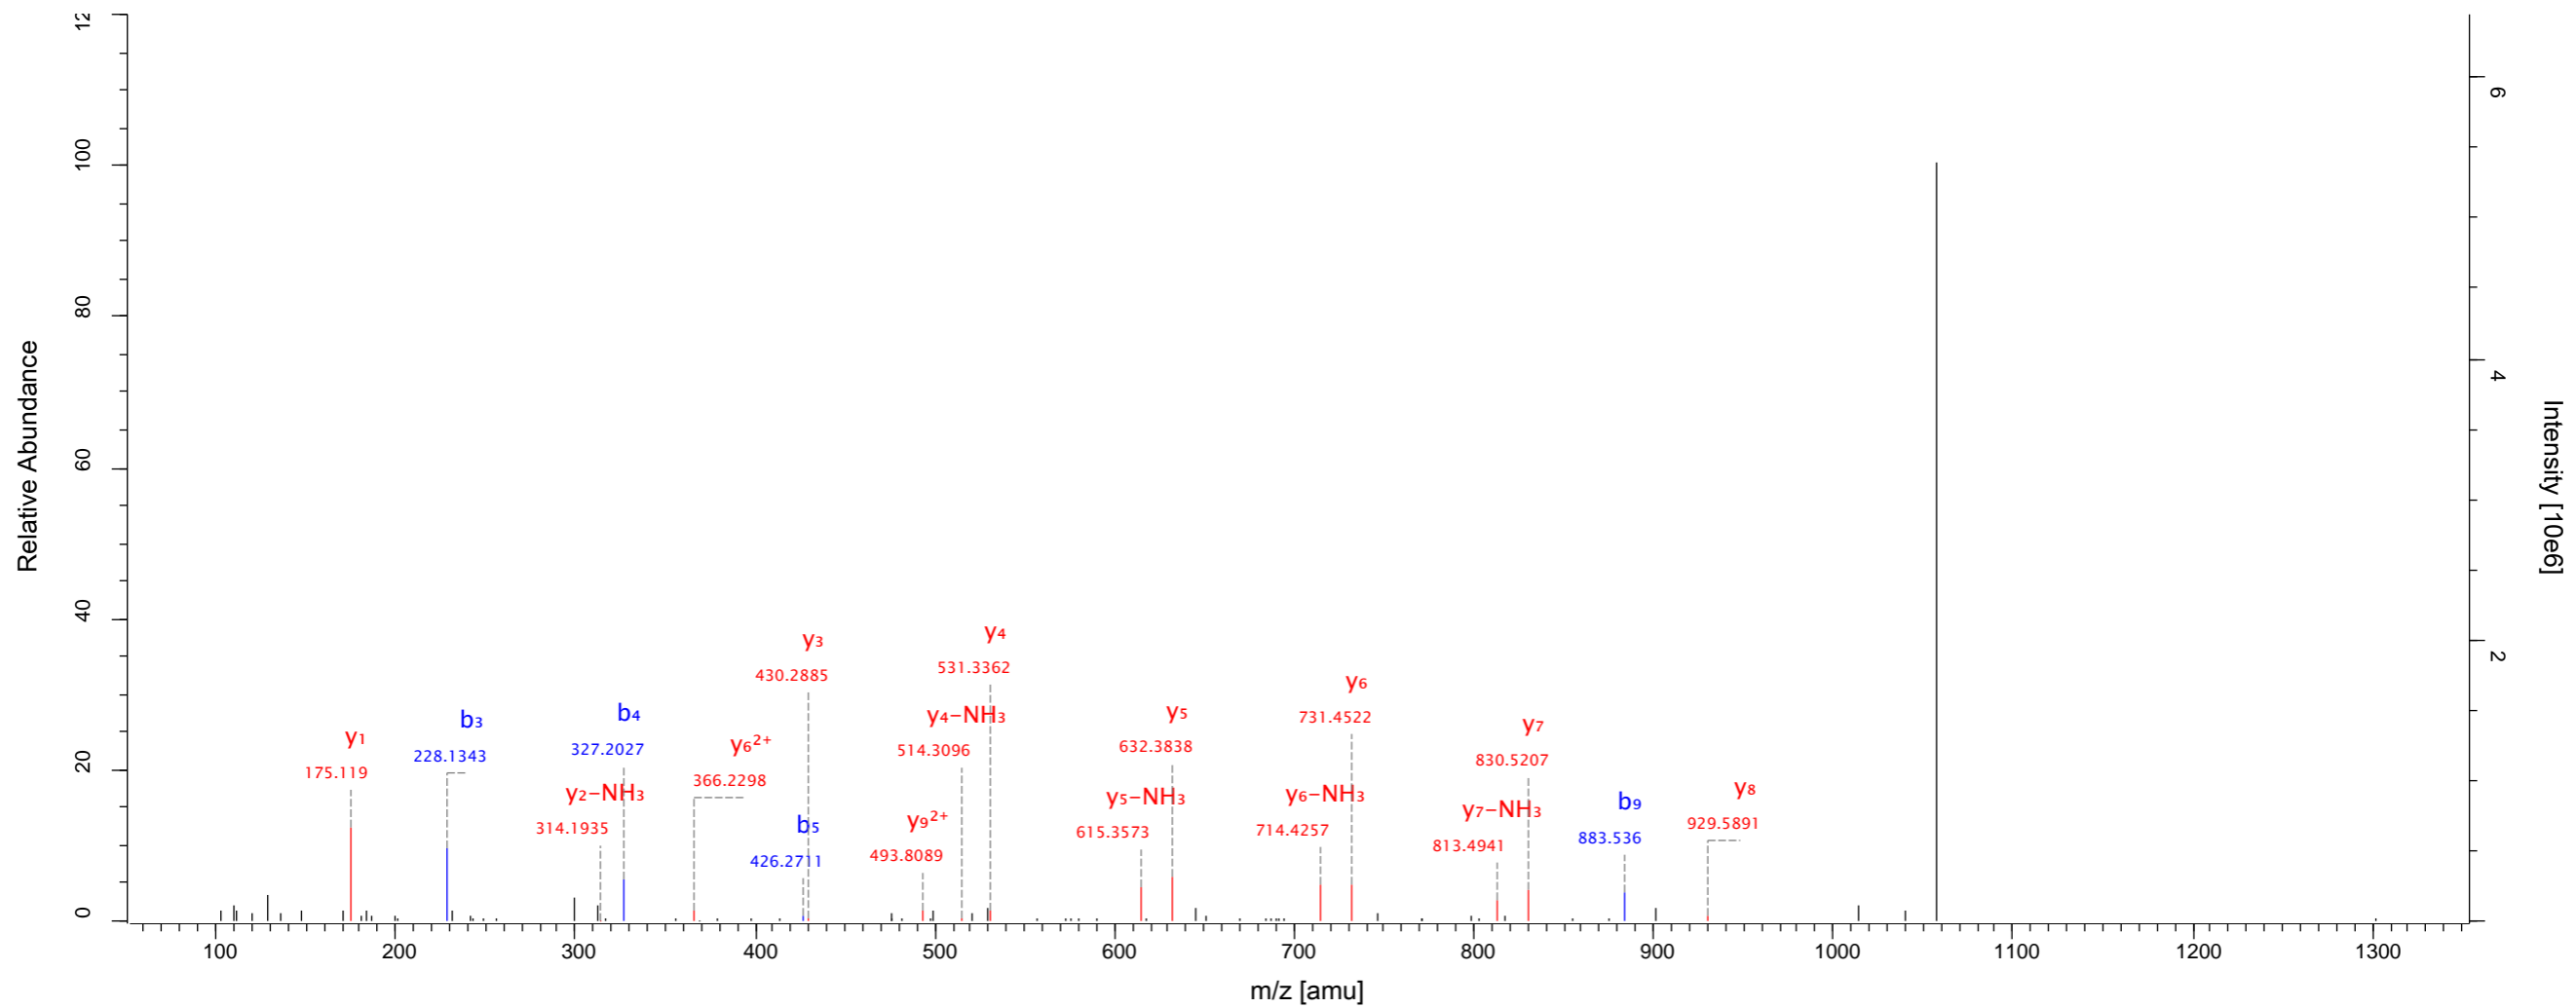

Raw file: 20111212\_EXQ5\_AnMi\_QC\_HCMVp11\_18  
 Scan number: 11986  
 Protein: ORFL301C - NC\_006273.2[185358,185666]- <unknown description>  
 Peptide score: 198.81  
 Method: FTMS; HCD

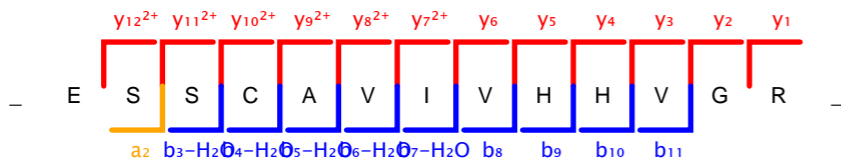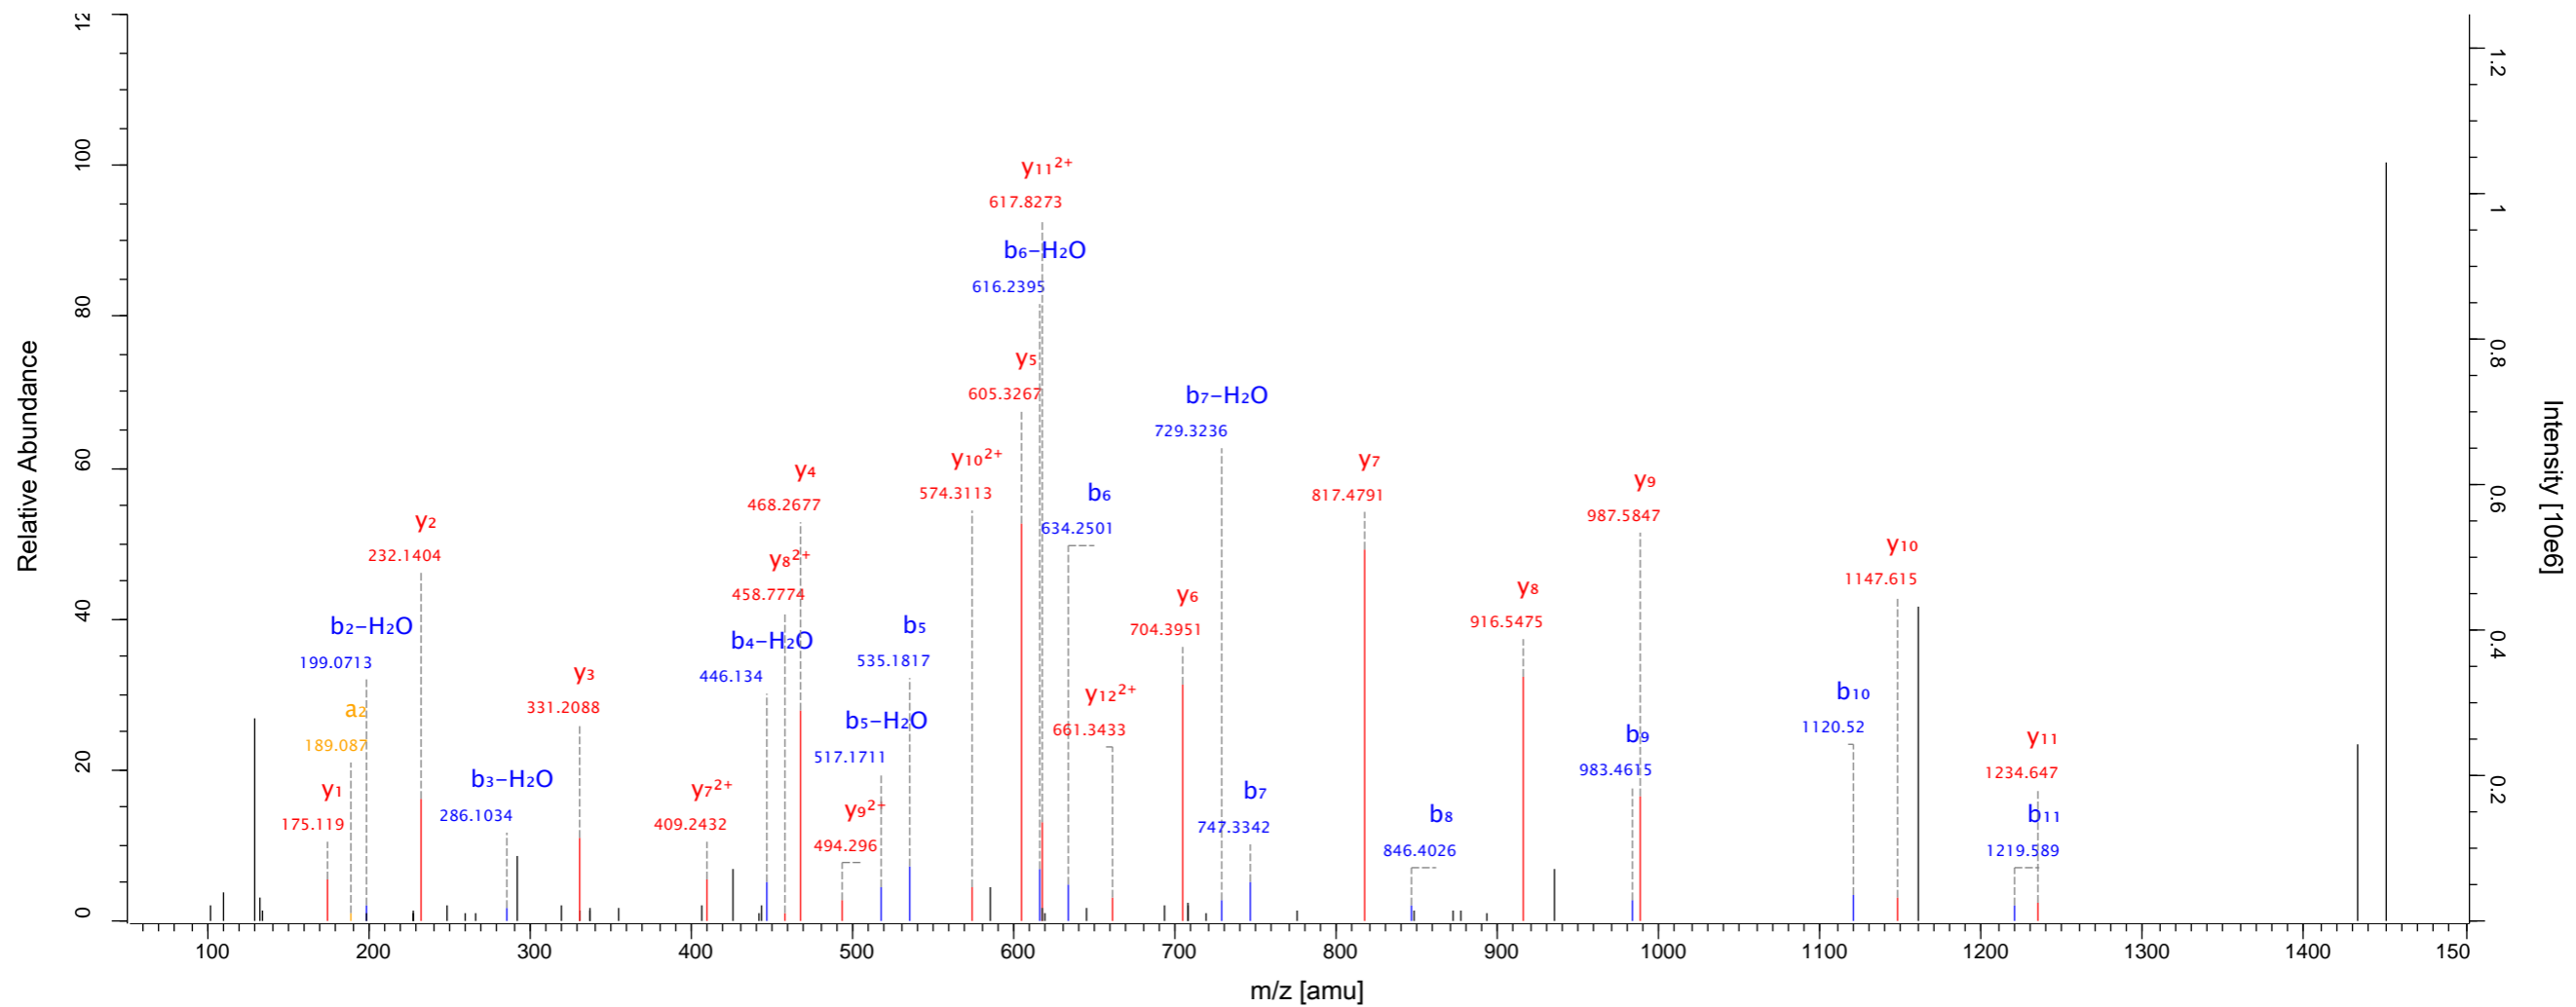

Raw file: 20111212\_EXQ5\_AnMi\_QC\_HCMVp1\_18  
Scan number: 12489  
Protein: ORFL137W.iORF1 + NC\_006273.2[75299,75529]+ <unknown description>  
Peptide score: 84.61  
Method: FTMS; HCD

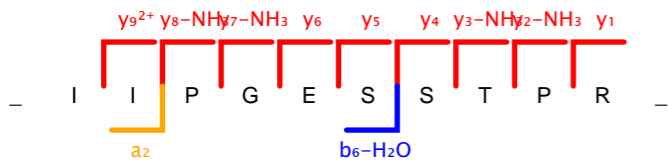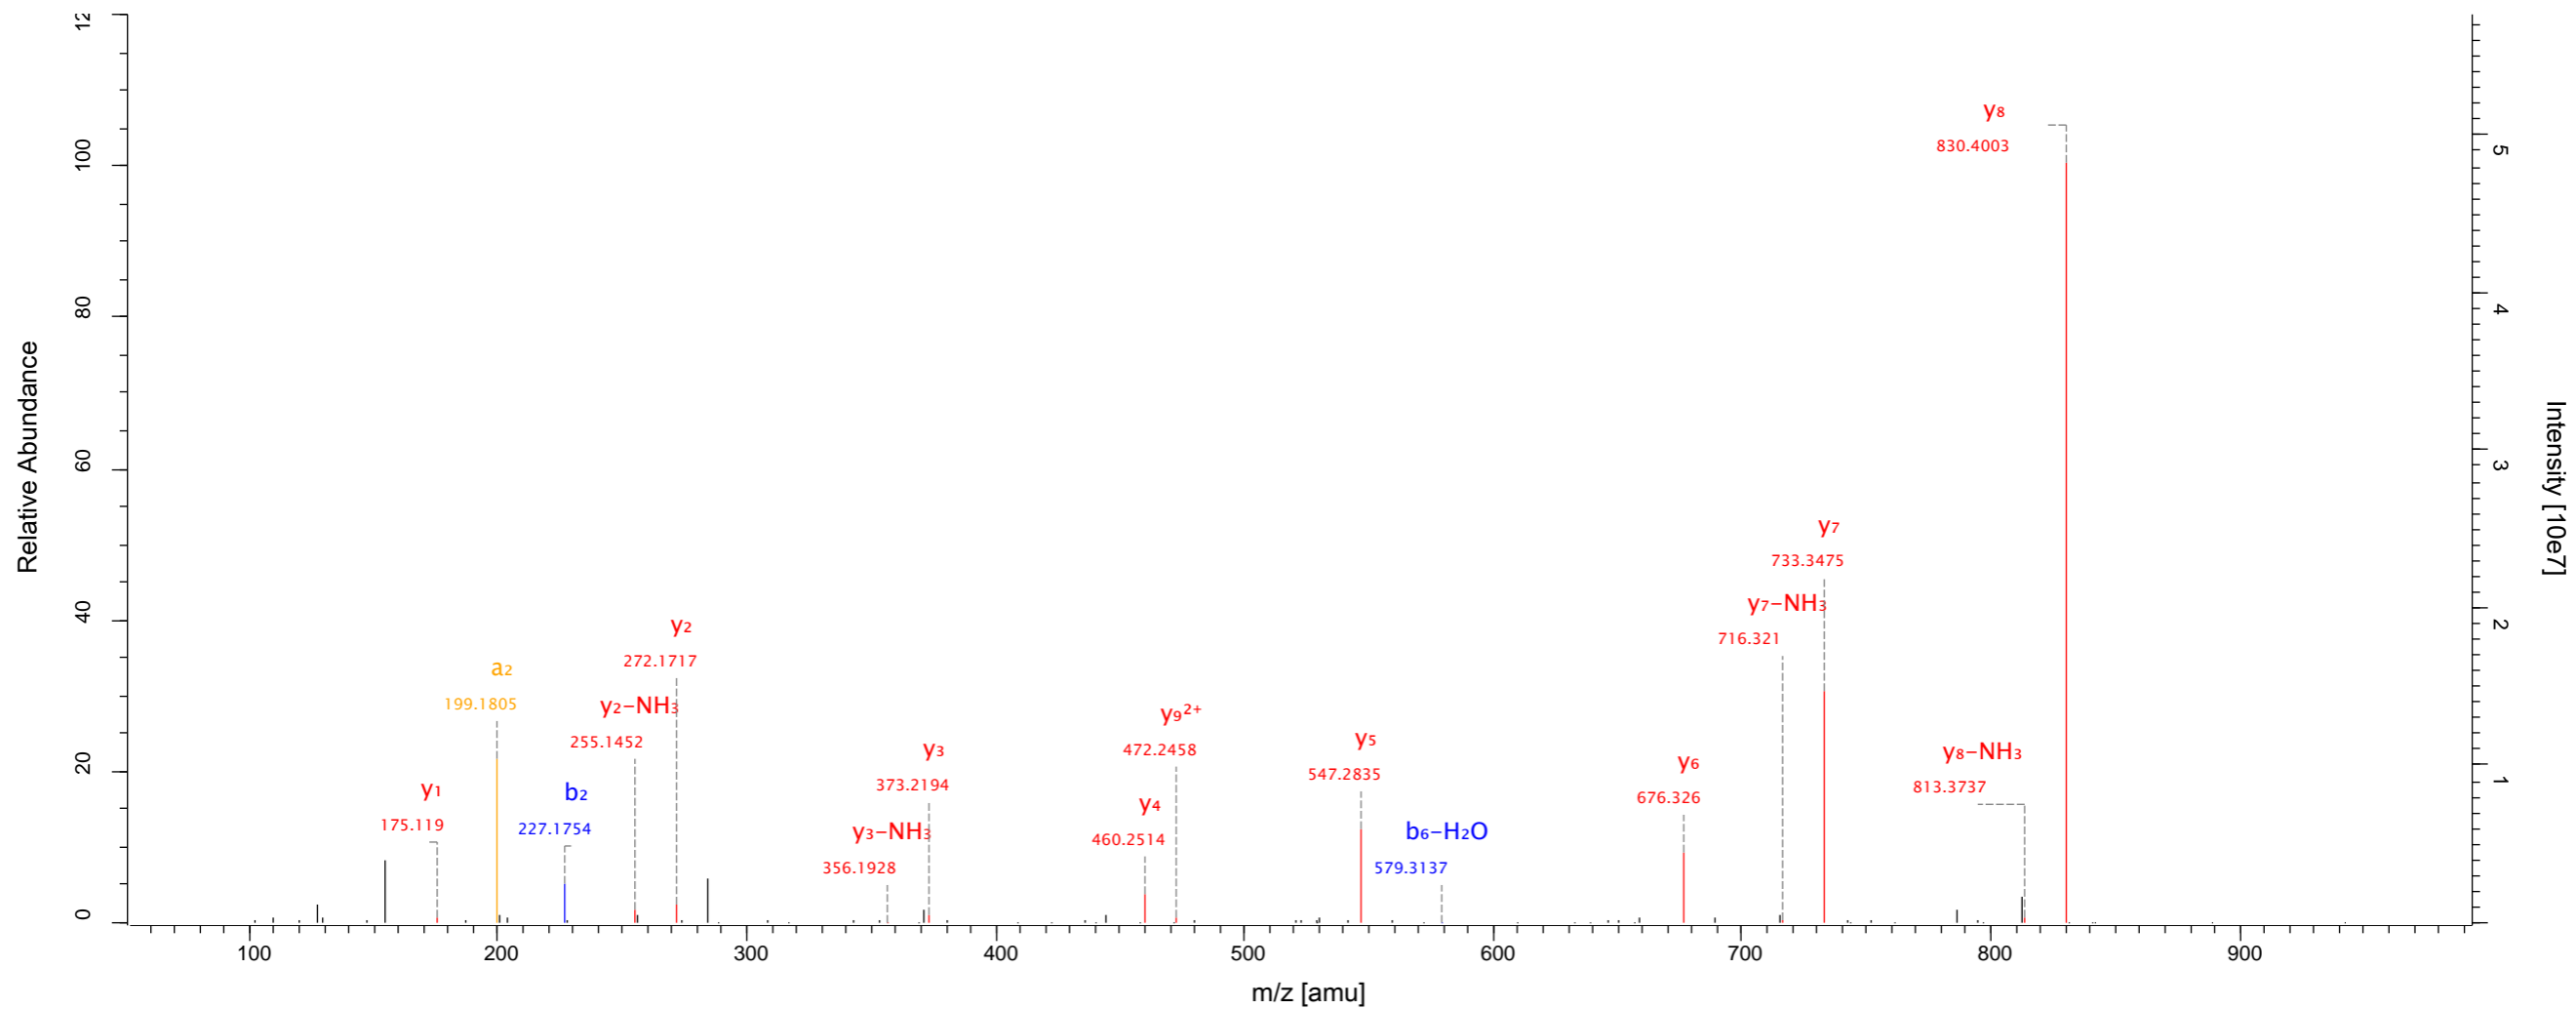

Raw file: 20111212\_EXQ5\_AnMi\_QC\_HCMVp1\_18  
 Scan number: 16808  
 Protein: ORFL271C.iORF1 - NC\_006273.2[176607,176858]- <unknown description>  
 Peptide score: 116.25  
 Method: FTMS; HCD

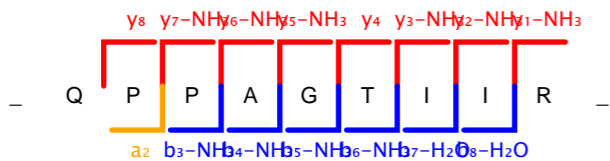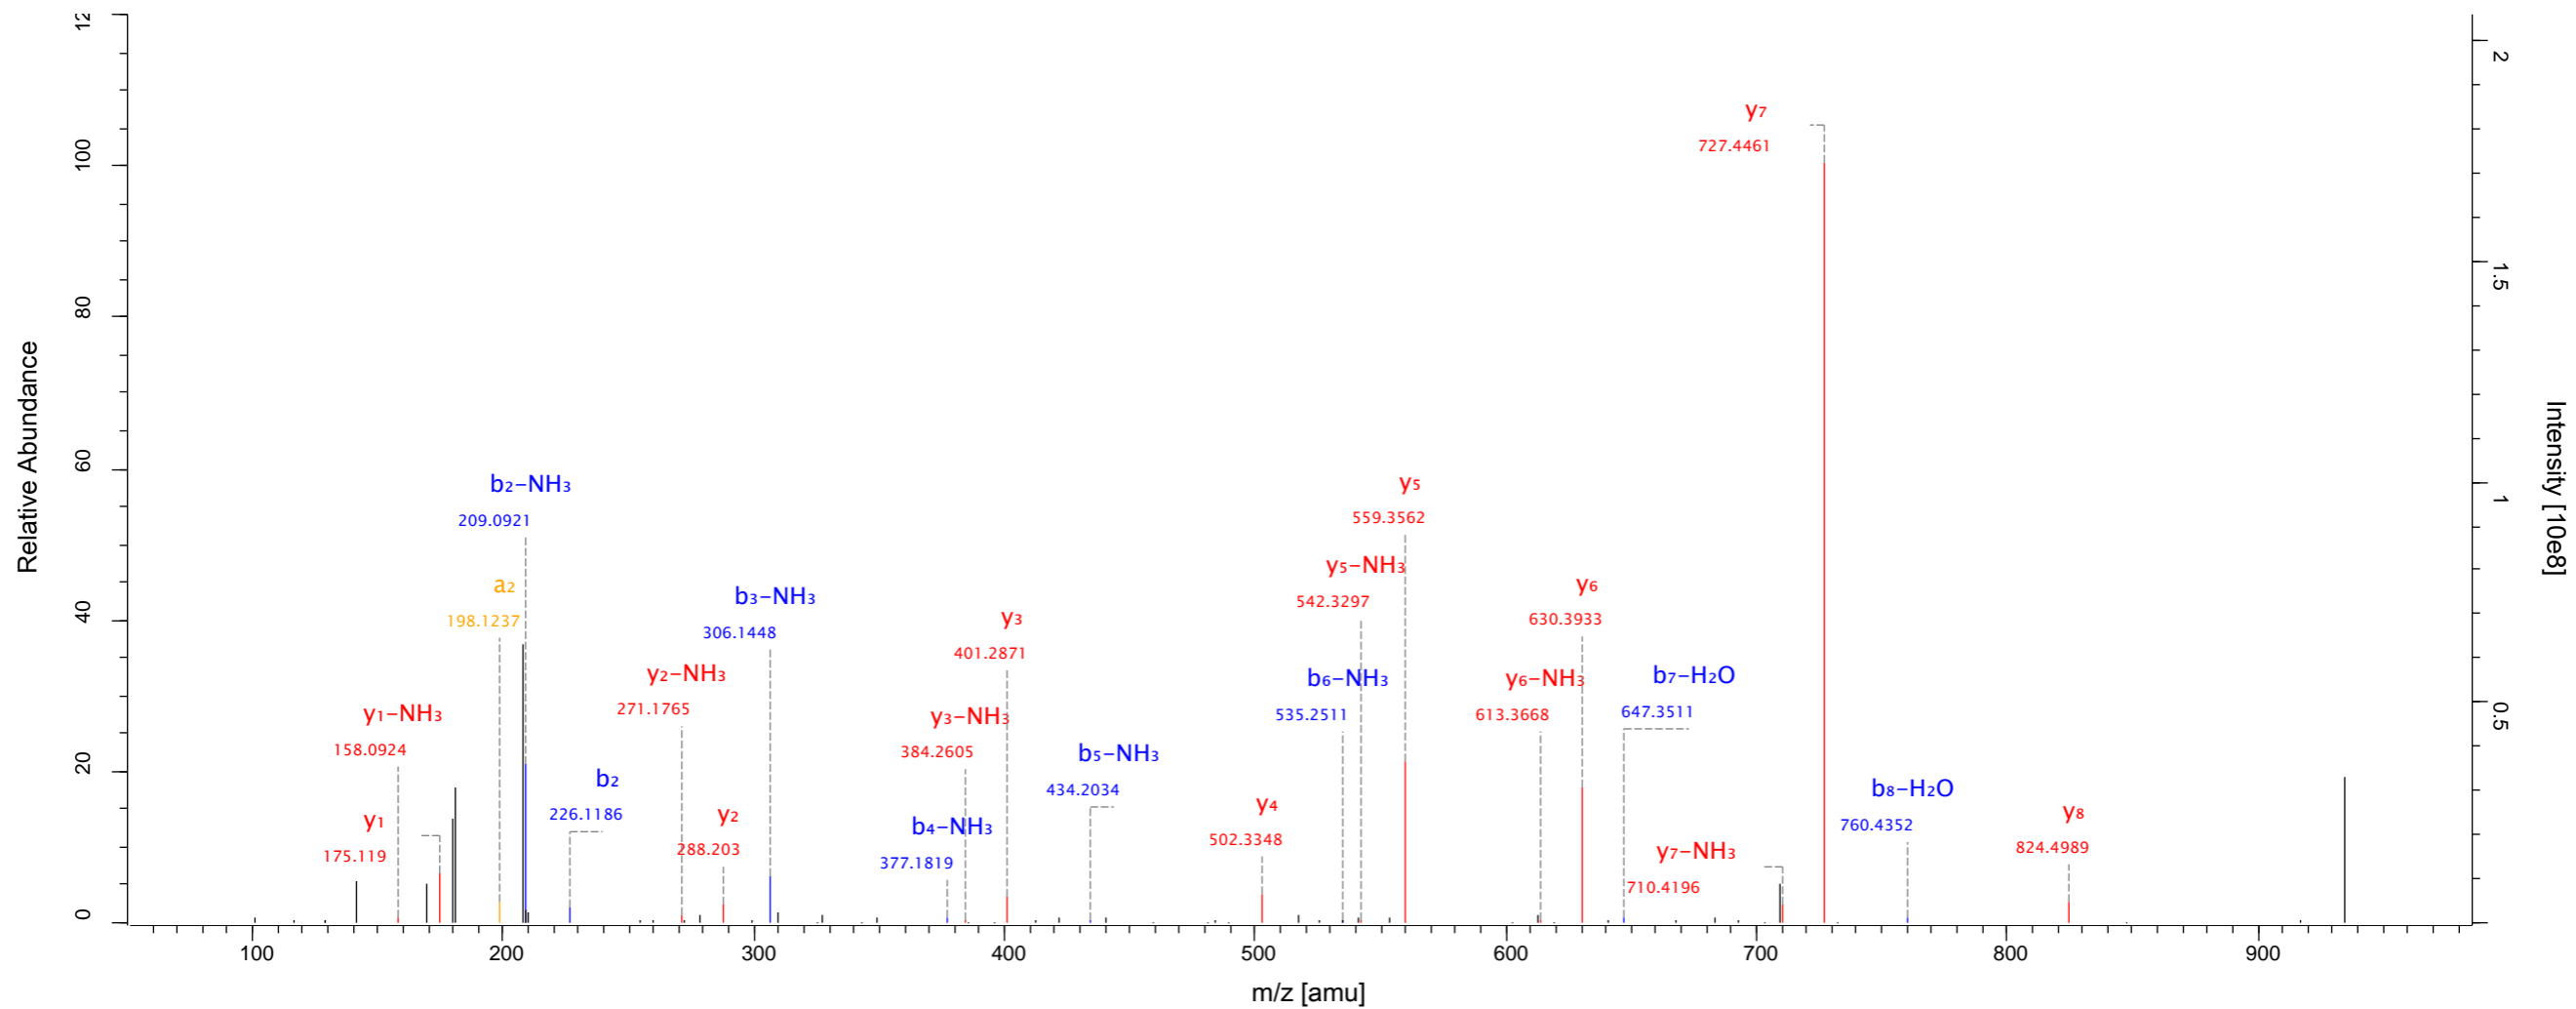



Raw file: 20111212\_EXQ5\_AnMi\_QC\_HCMVp1\_18  
 Scan number: 18638  
 Protein: ORFL121C - NC\_006273.2[65579,65851]- <unknown description>  
 Peptide score: 108.43  
 Method: FTMS; HCD

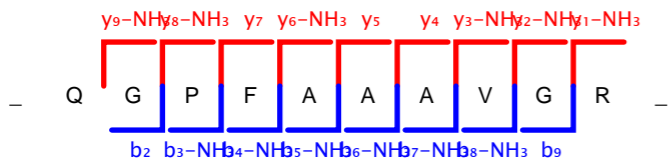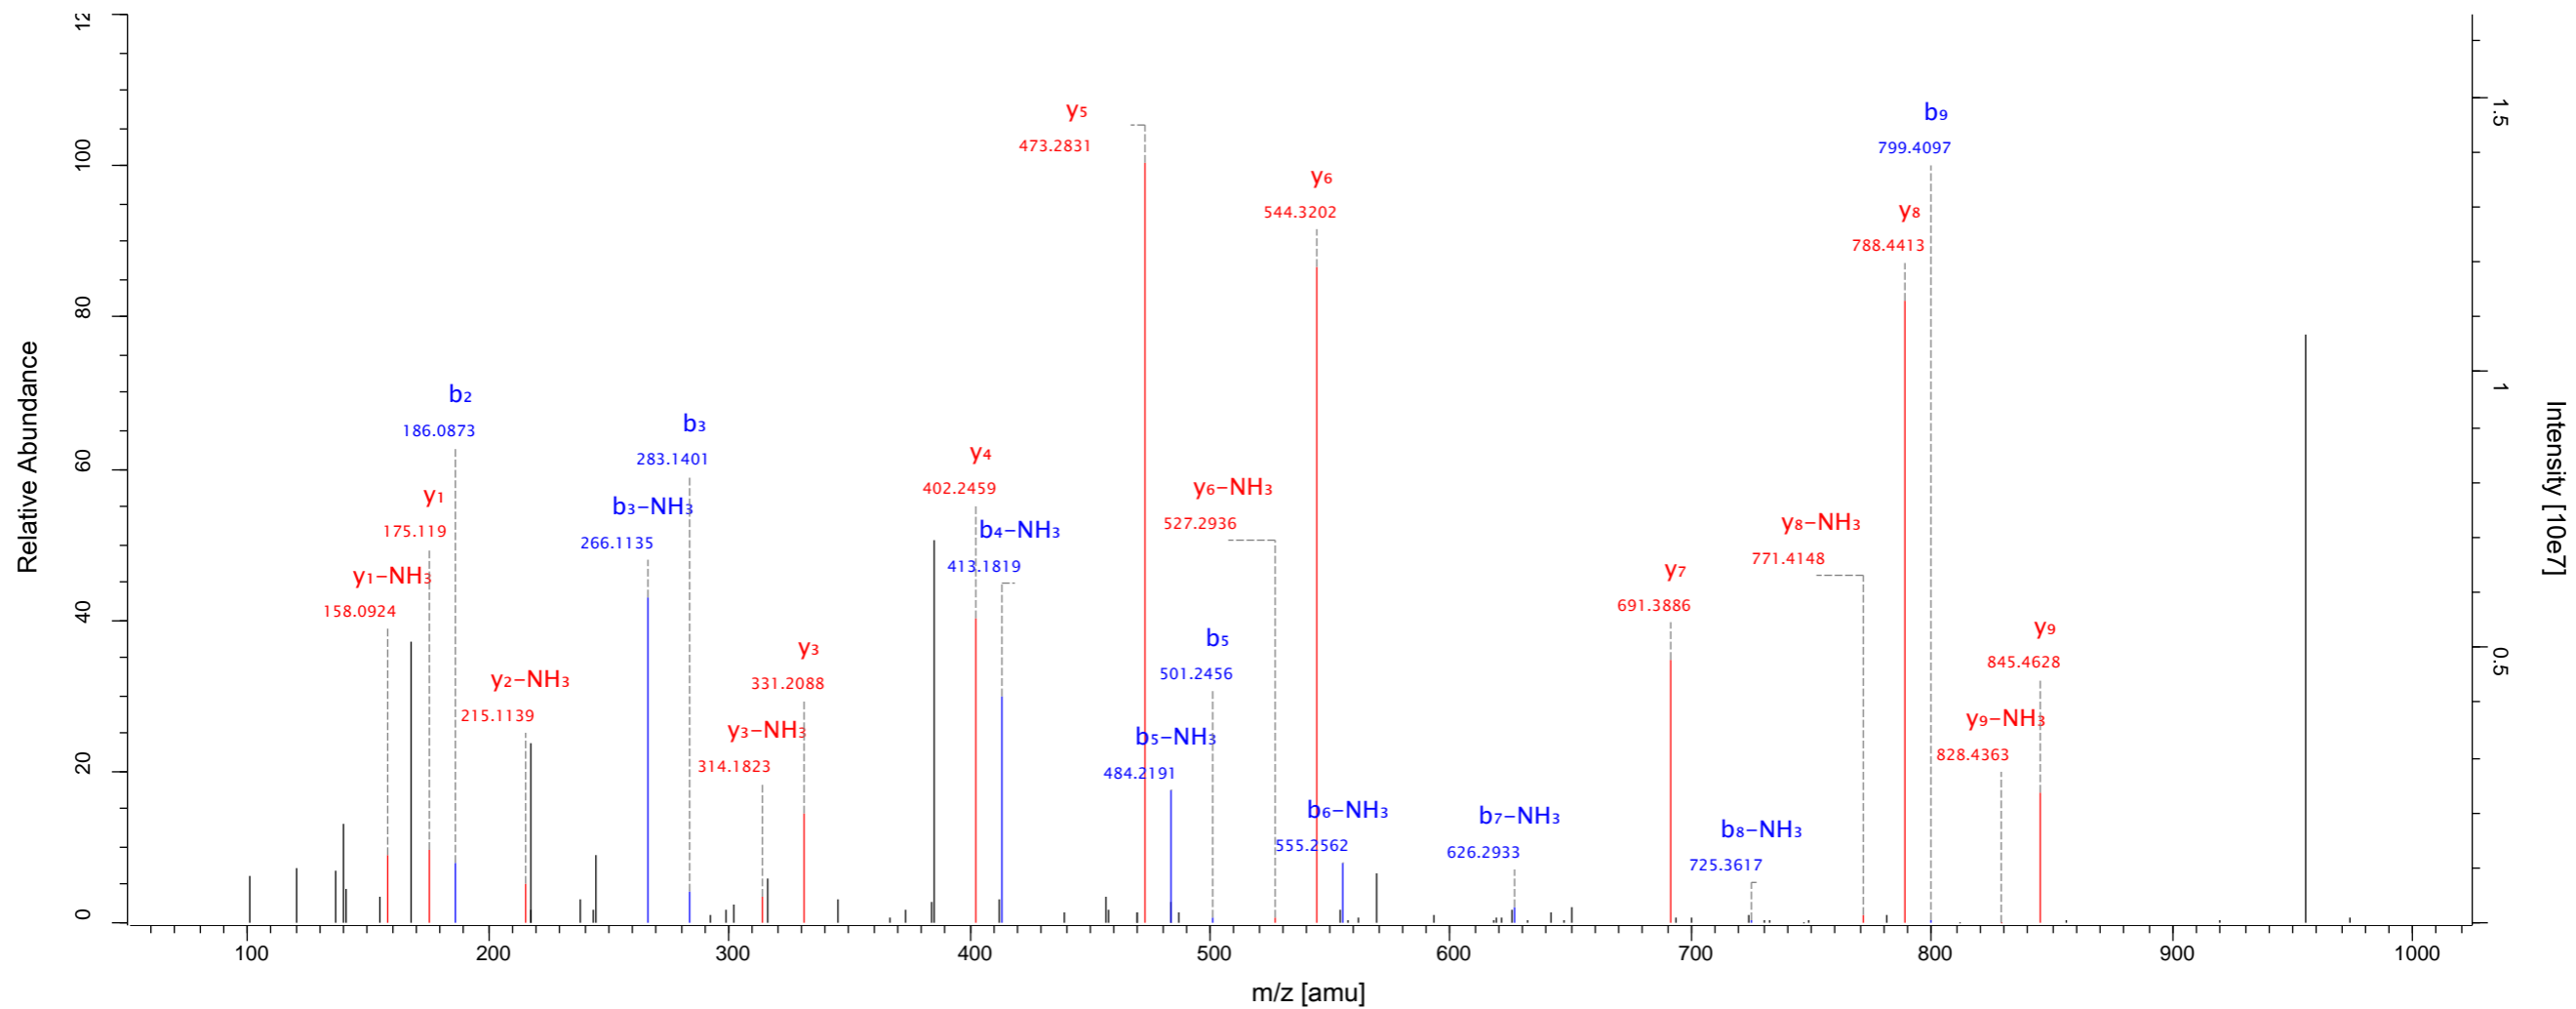

Raw file: 20111212\_EXQ5\_AnMi\_QC\_HCMVp1\_18  
 Scan number: 19088  
 Protein: ORFL294W.iORF1 + NC\_006273.2[183230,193441]+ <unknown description>; ORFL294W + NC\_006273.2[183230,193441]+ <unknown description>  
 Peptide score: 255.19  
 Method: FTMS; HCD

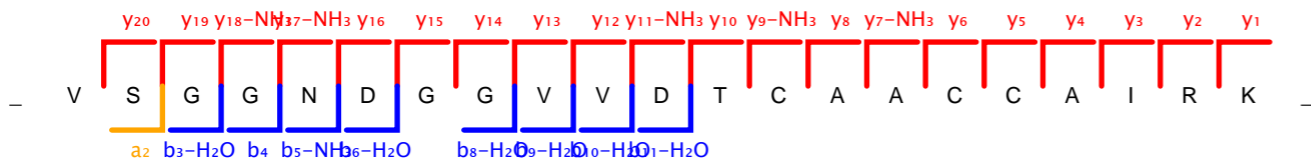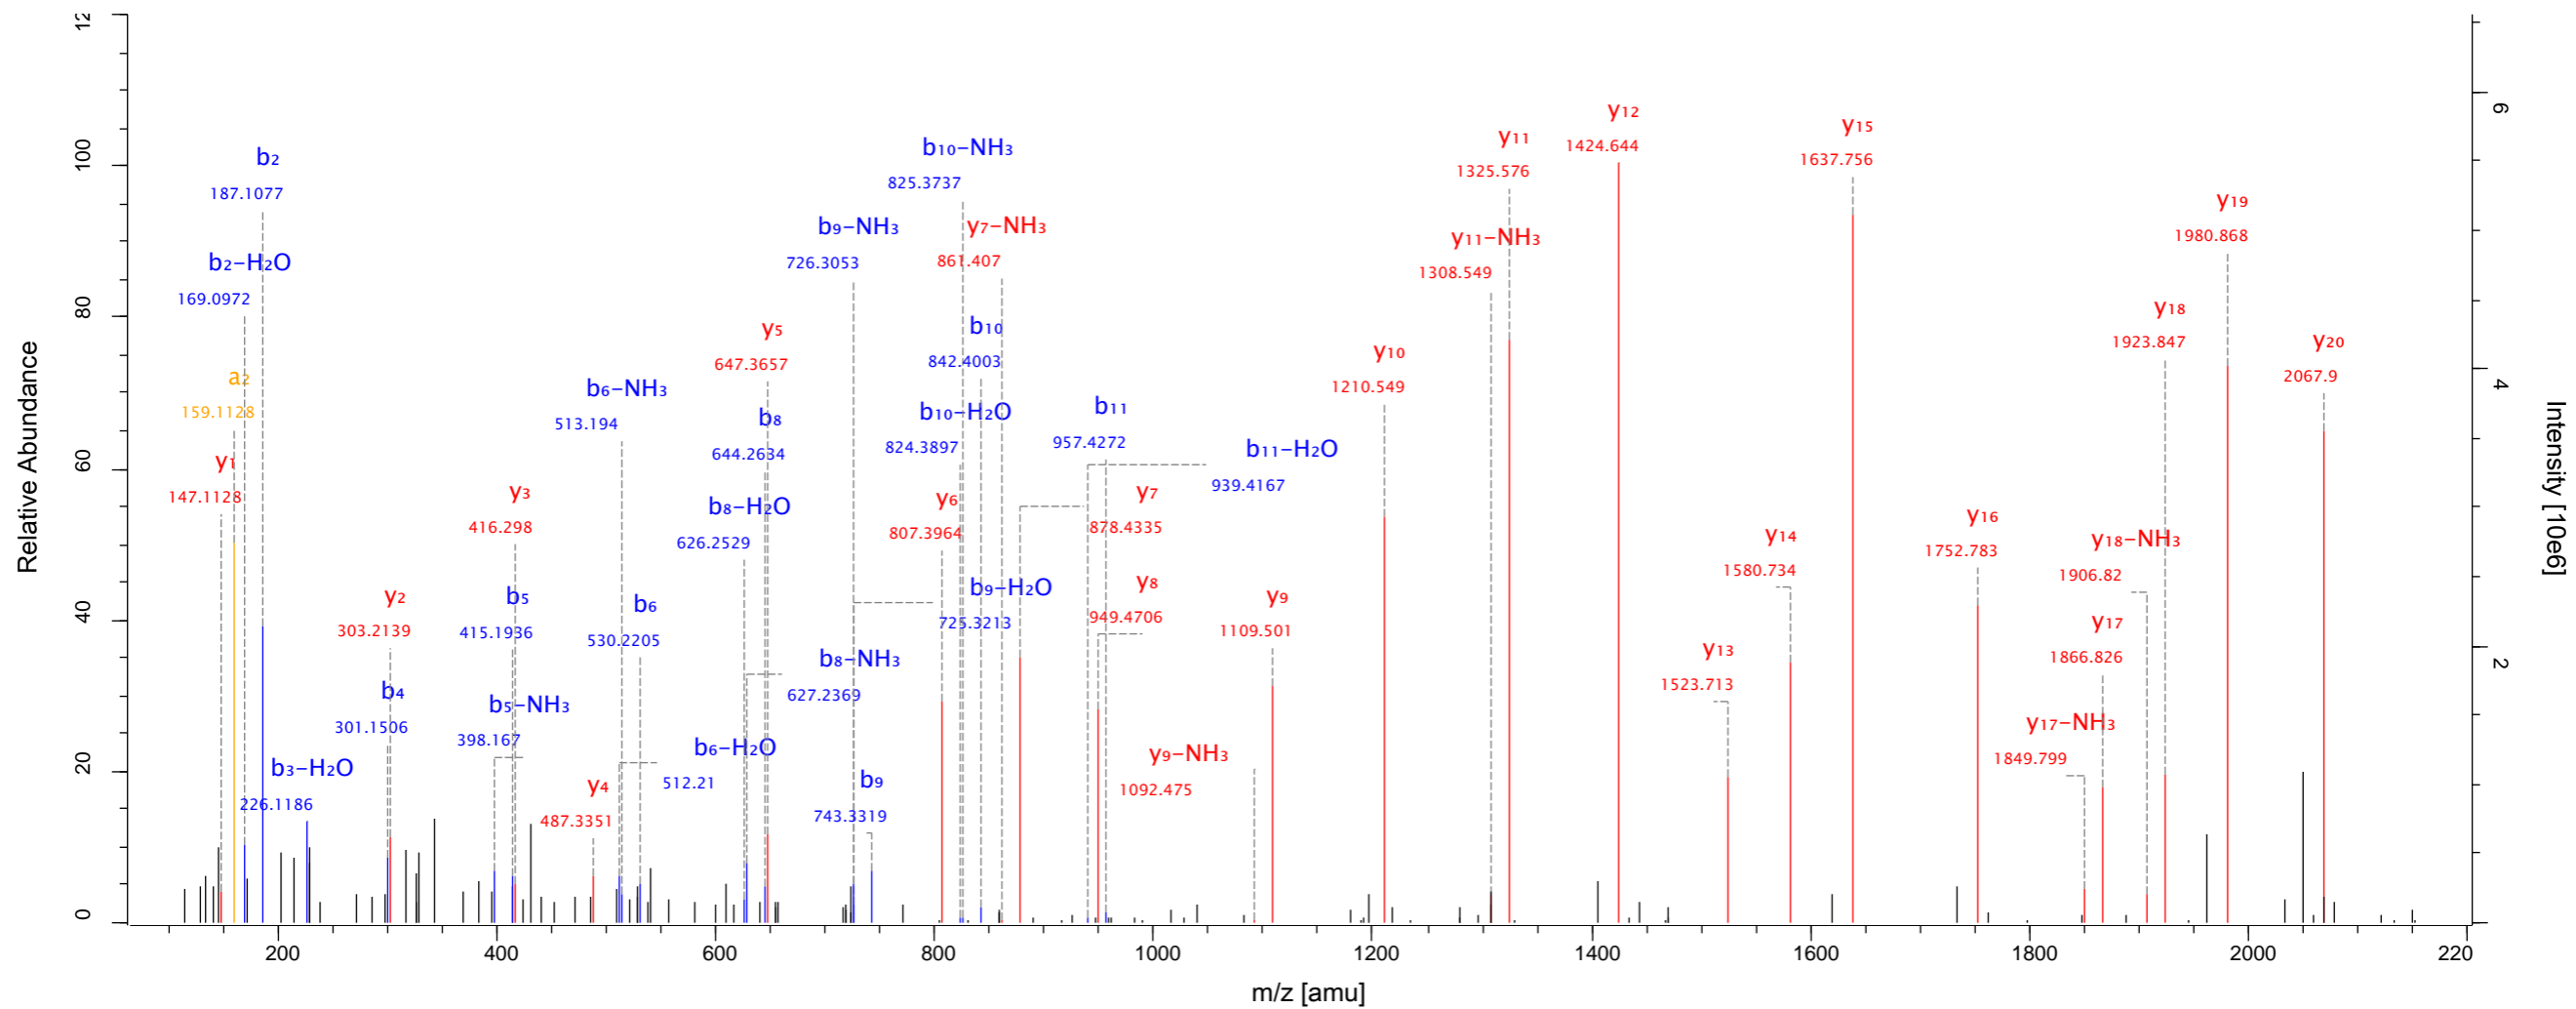

Raw file: 20111212\_EXQ5\_AnMi\_QC\_HCMVp1\_18  
 Scan number: 19728  
 Protein: ORFL47W.iORF1 + NC\_006273.2[21305,21601]+ <unknown description>  
 Peptide score: 111.43  
 Method: FTMS; HCD

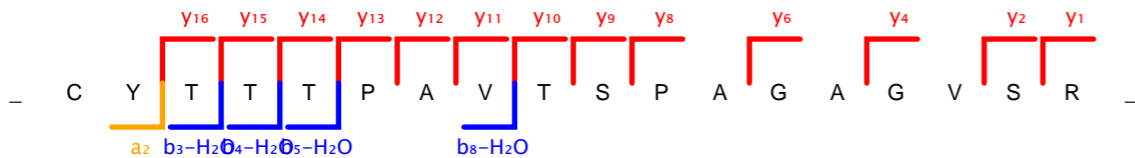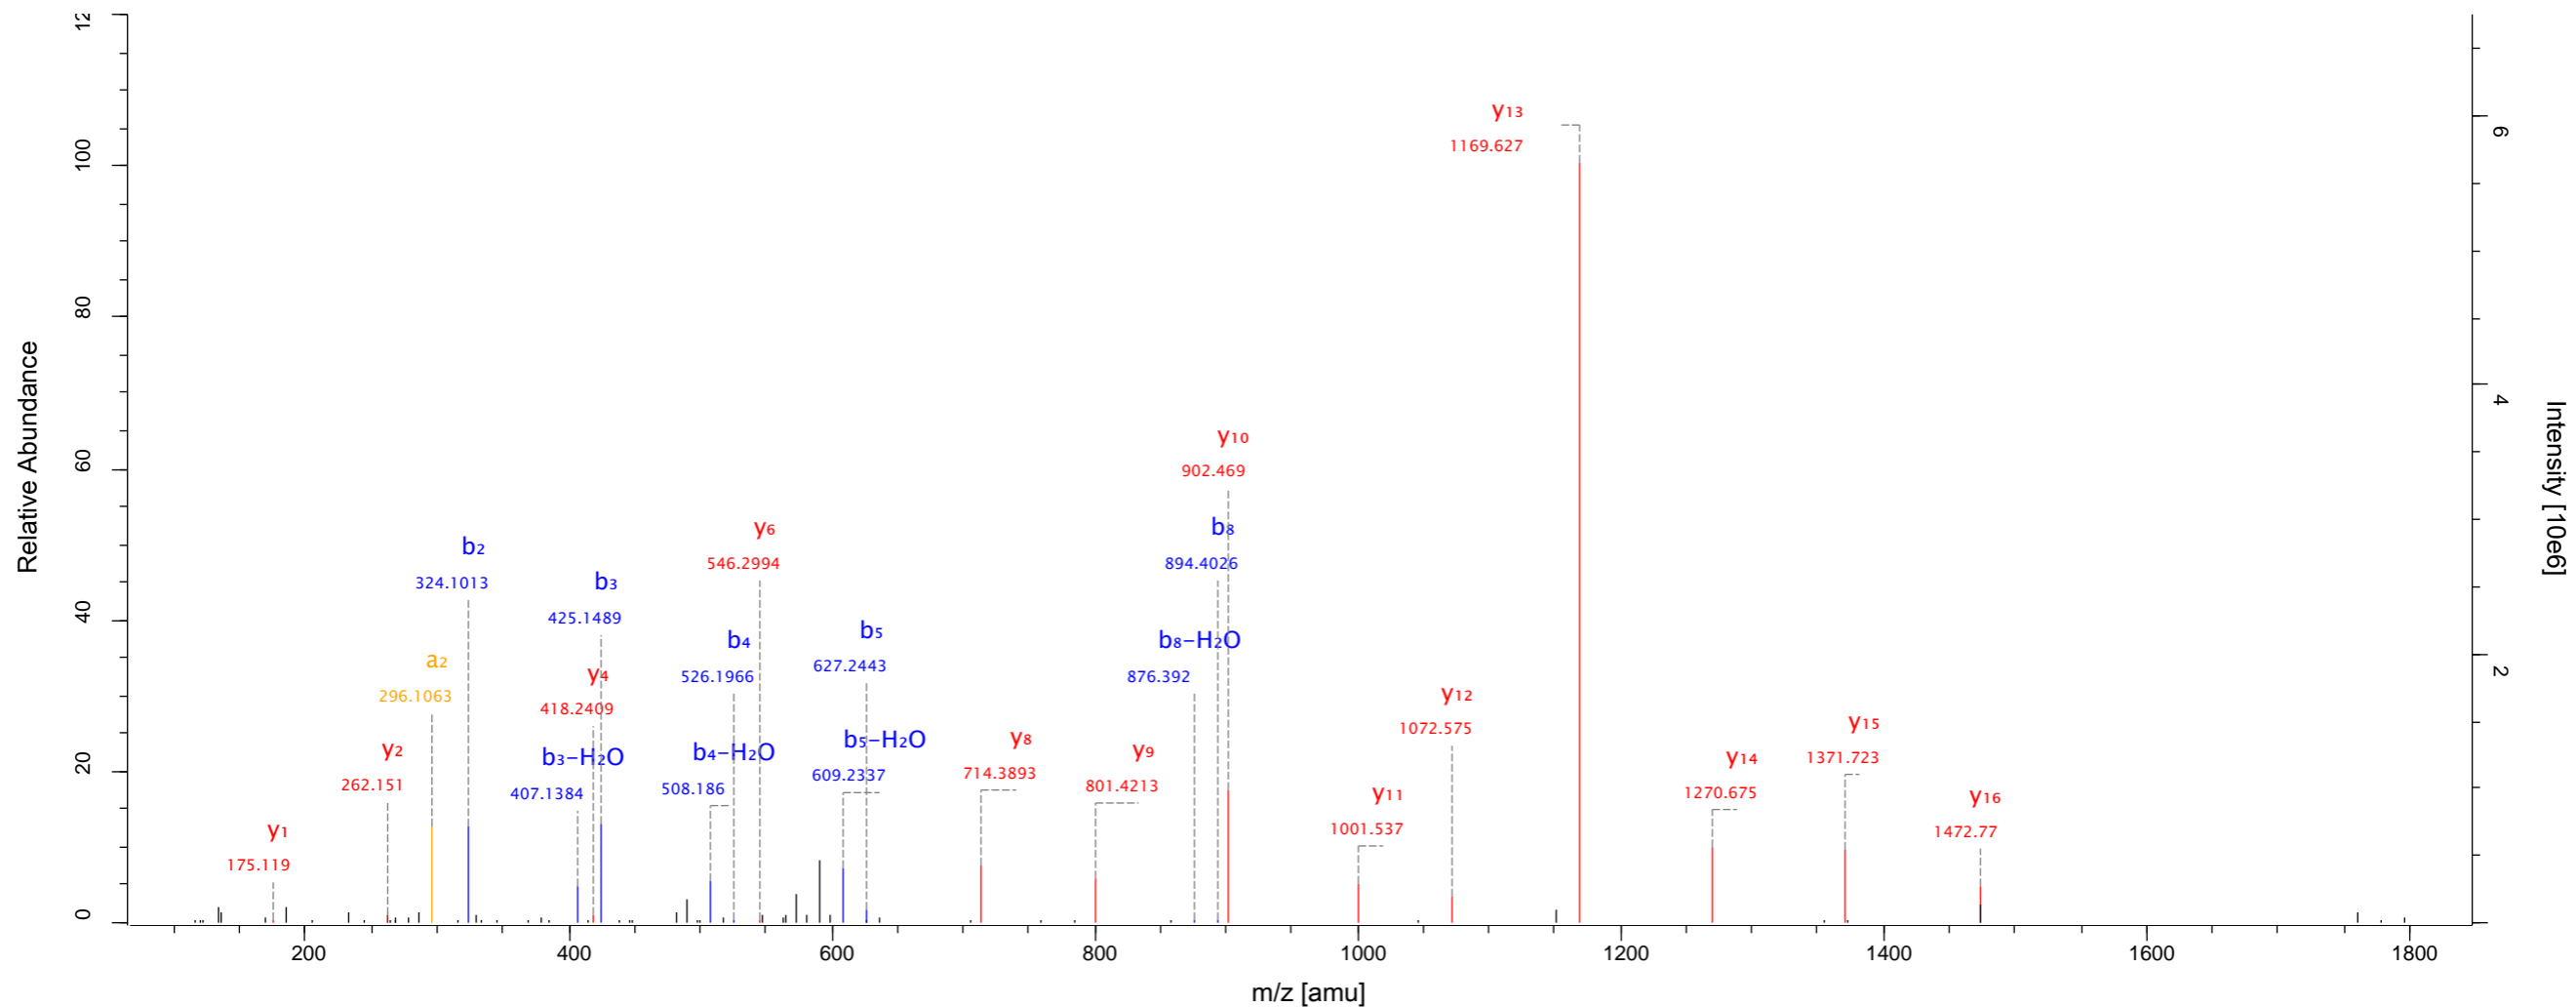

Raw file: 20111212\_EXQ5\_AnMi\_QC\_HCMVp1\_18  
Scan number: 21557  
Protein: ORFL106C - NC\_006273.2[53935,54294]- <unknown description>  
Peptide score: 161.68  
Method: FTMS; HCD

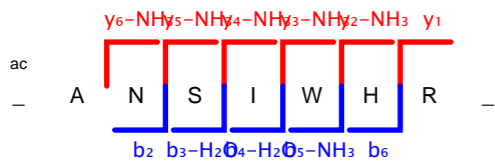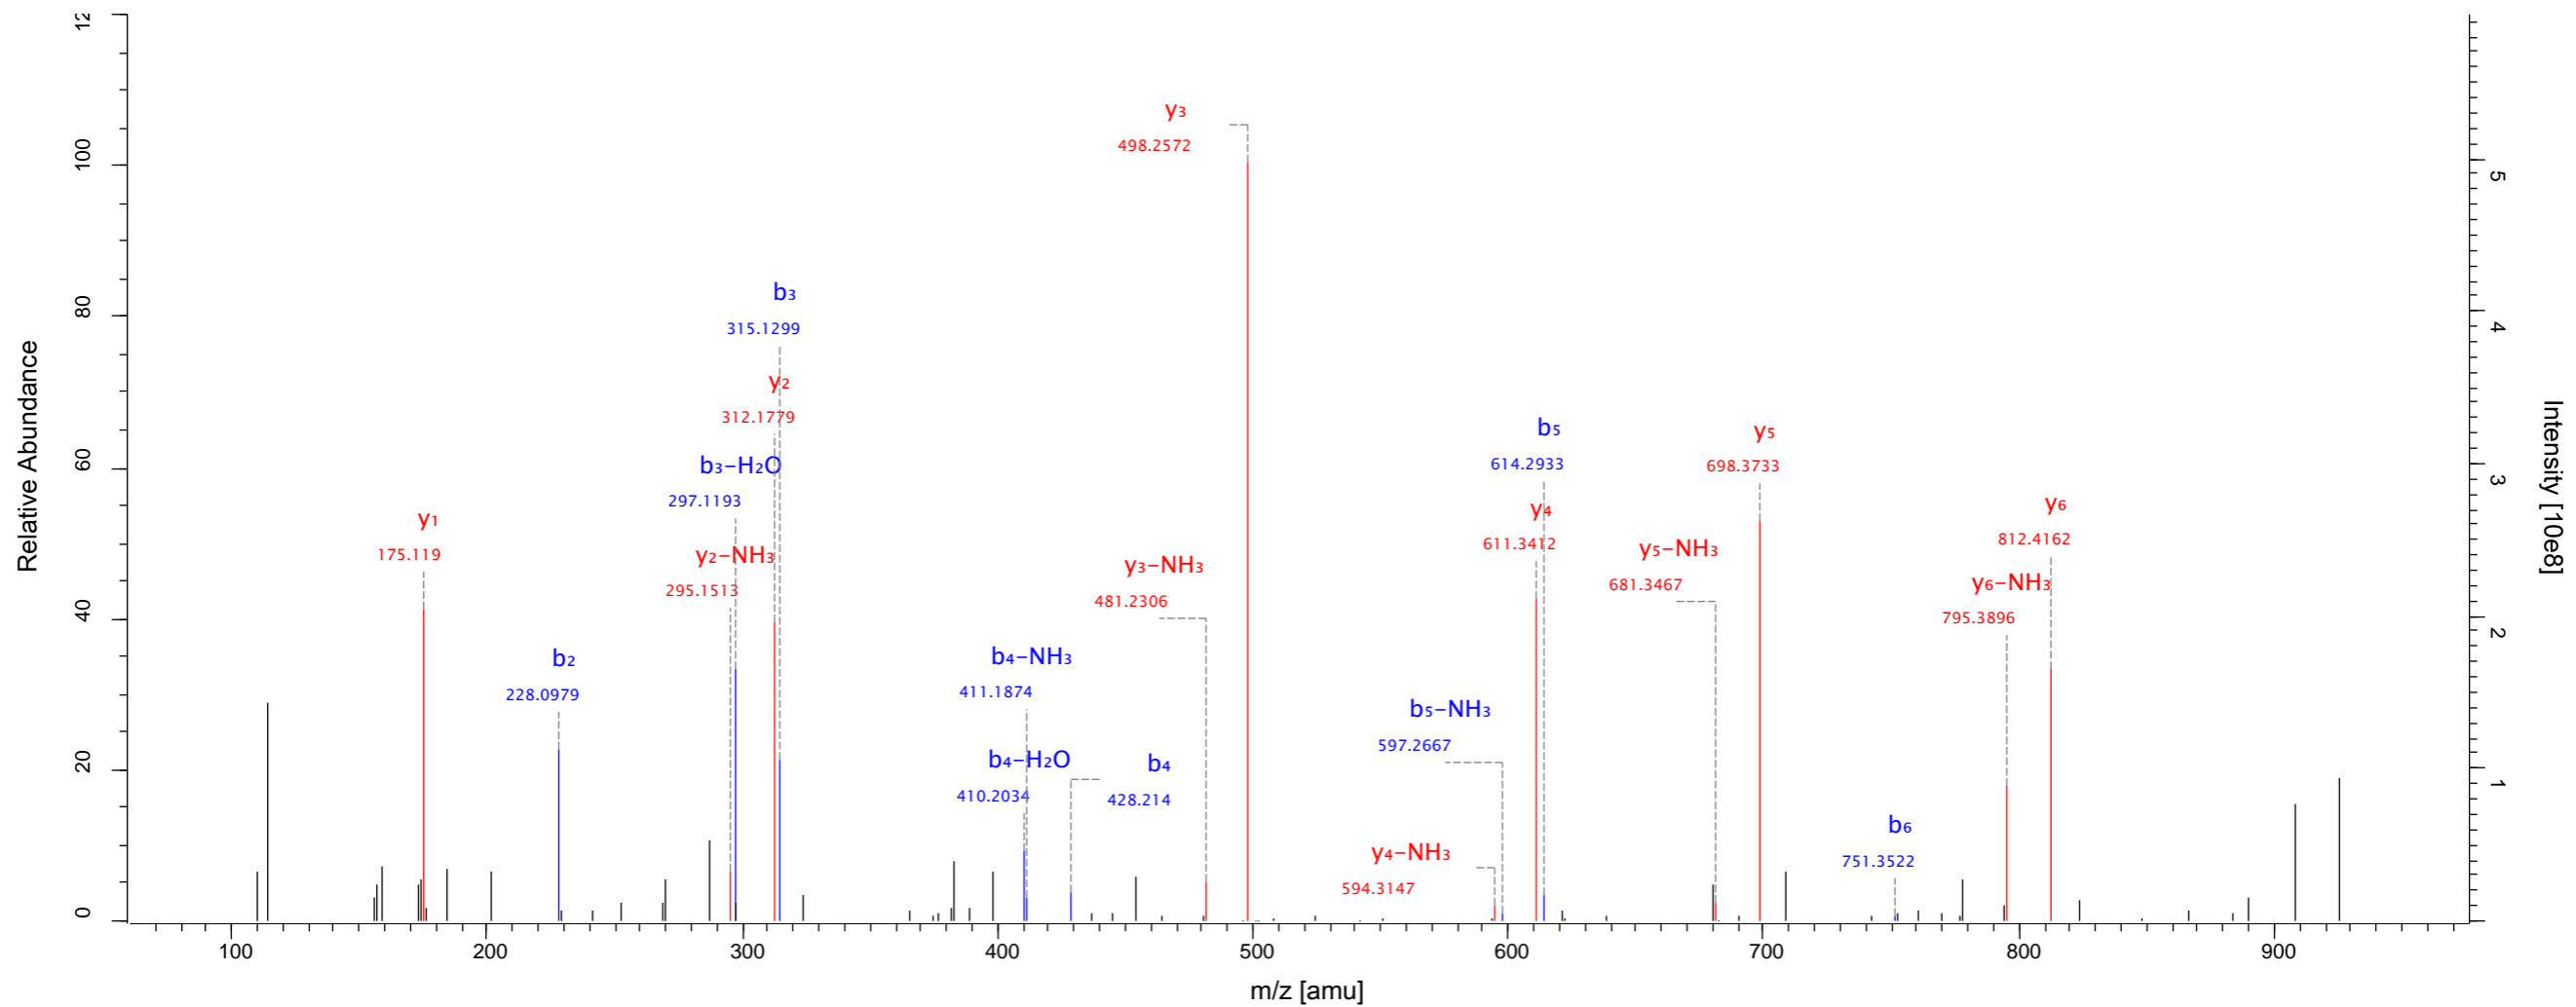

Raw file: 20111212\_EXQ5\_AnMi\_QC\_HCMVp1\_18  
 Scan number: 23426  
 Protein: ORFL142W + NC\_006273.2[78726,79031]+ <unknown description>  
 Peptide score: 155.33  
 Method: FTMS; HCD

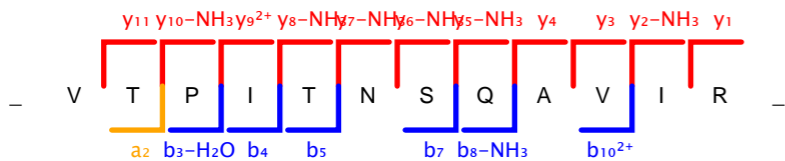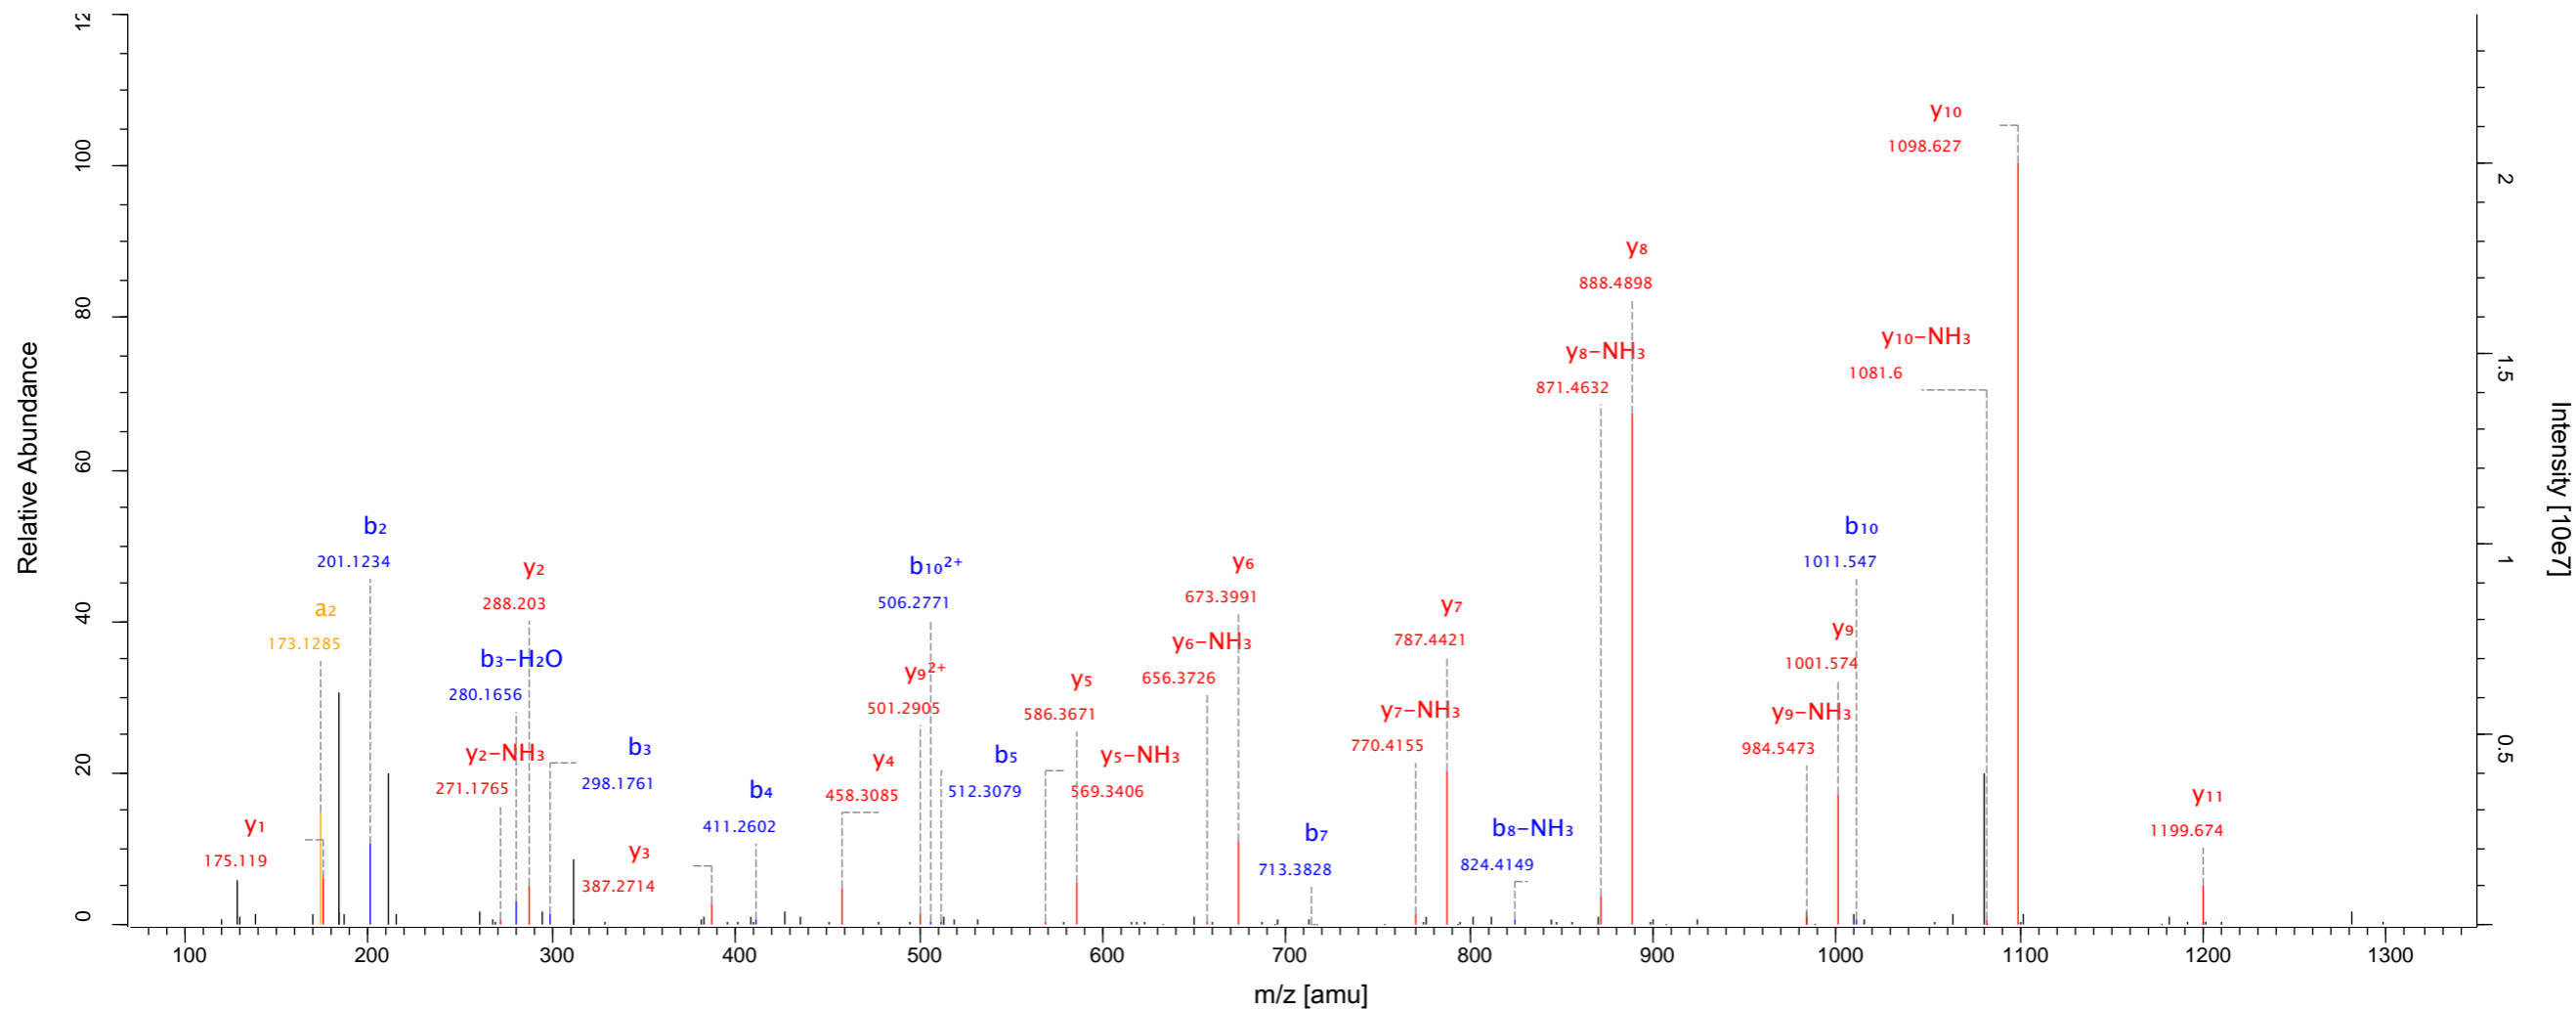

Raw file: 20111212\_EXQ5\_AnMi\_QC\_HCMVp1\_18  
 Scan number: 24830  
 Protein: ORFL159W + NC\_006273.2[101475,109052]+ <unknown description>; ORFL159W.iORF1 + NC\_006273.2[101526,109052]+ <unknown description>  
 Peptide score: 132.32  
 Method: FTMS; HCD

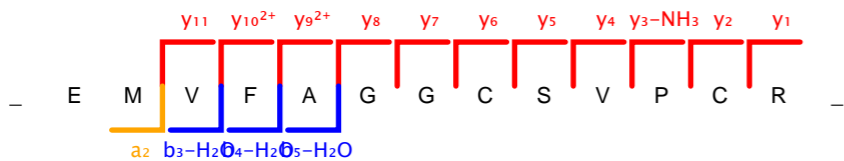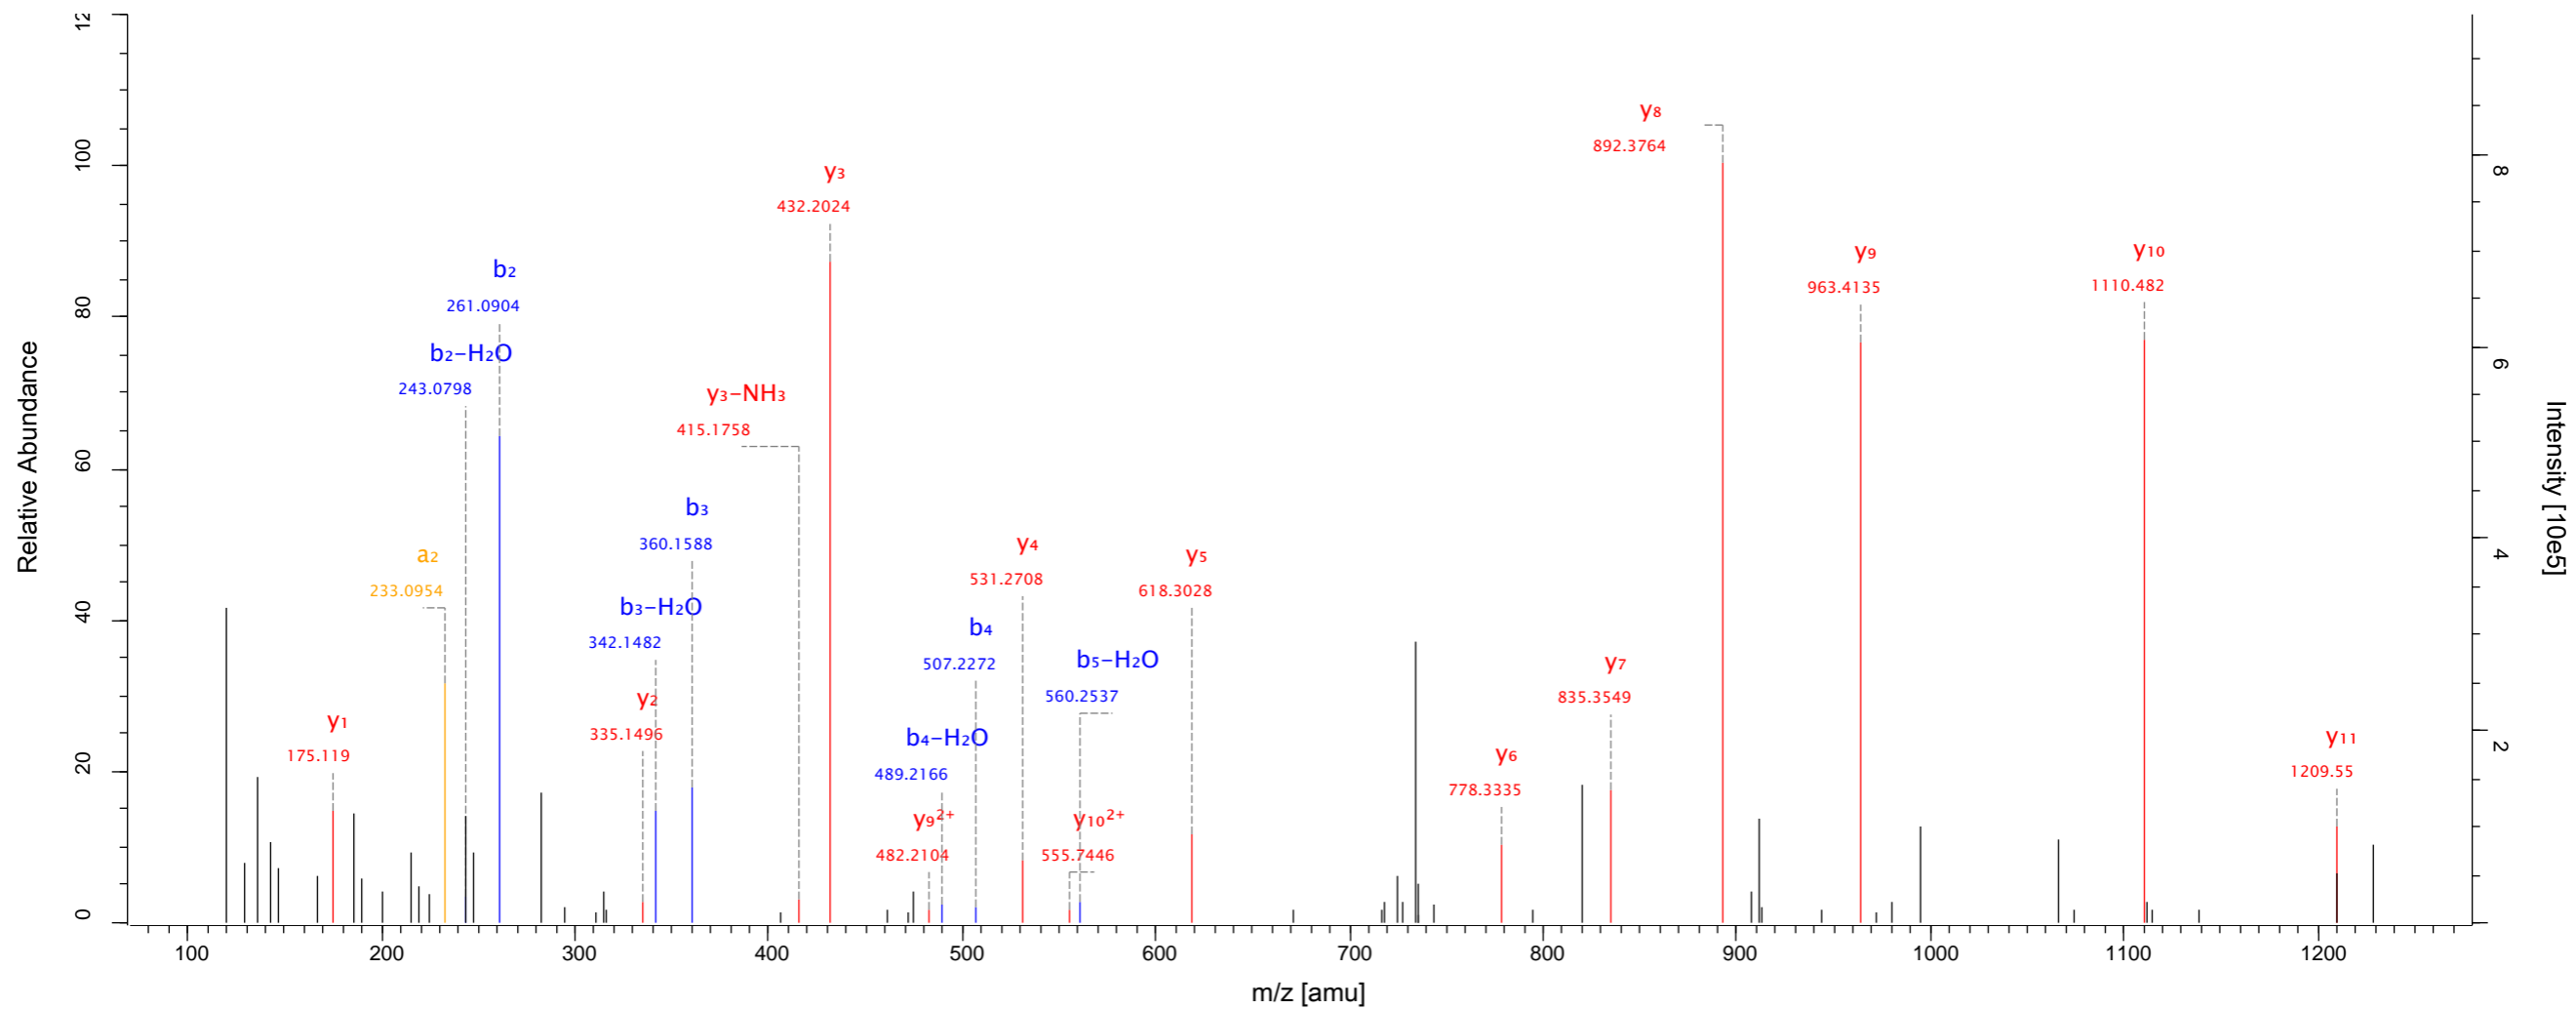

Raw file: 20111212\_EXQ5\_AnMi\_QC\_HCMVp1\_18  
 Scan number: 26132  
 Protein: ORFL174C.iORF2 - NC\_006273.2[106396,106770]- <unknown description>  
 Peptide score: 157.56  
 Method: FTMS; HCD

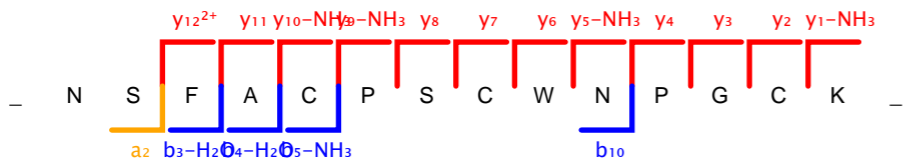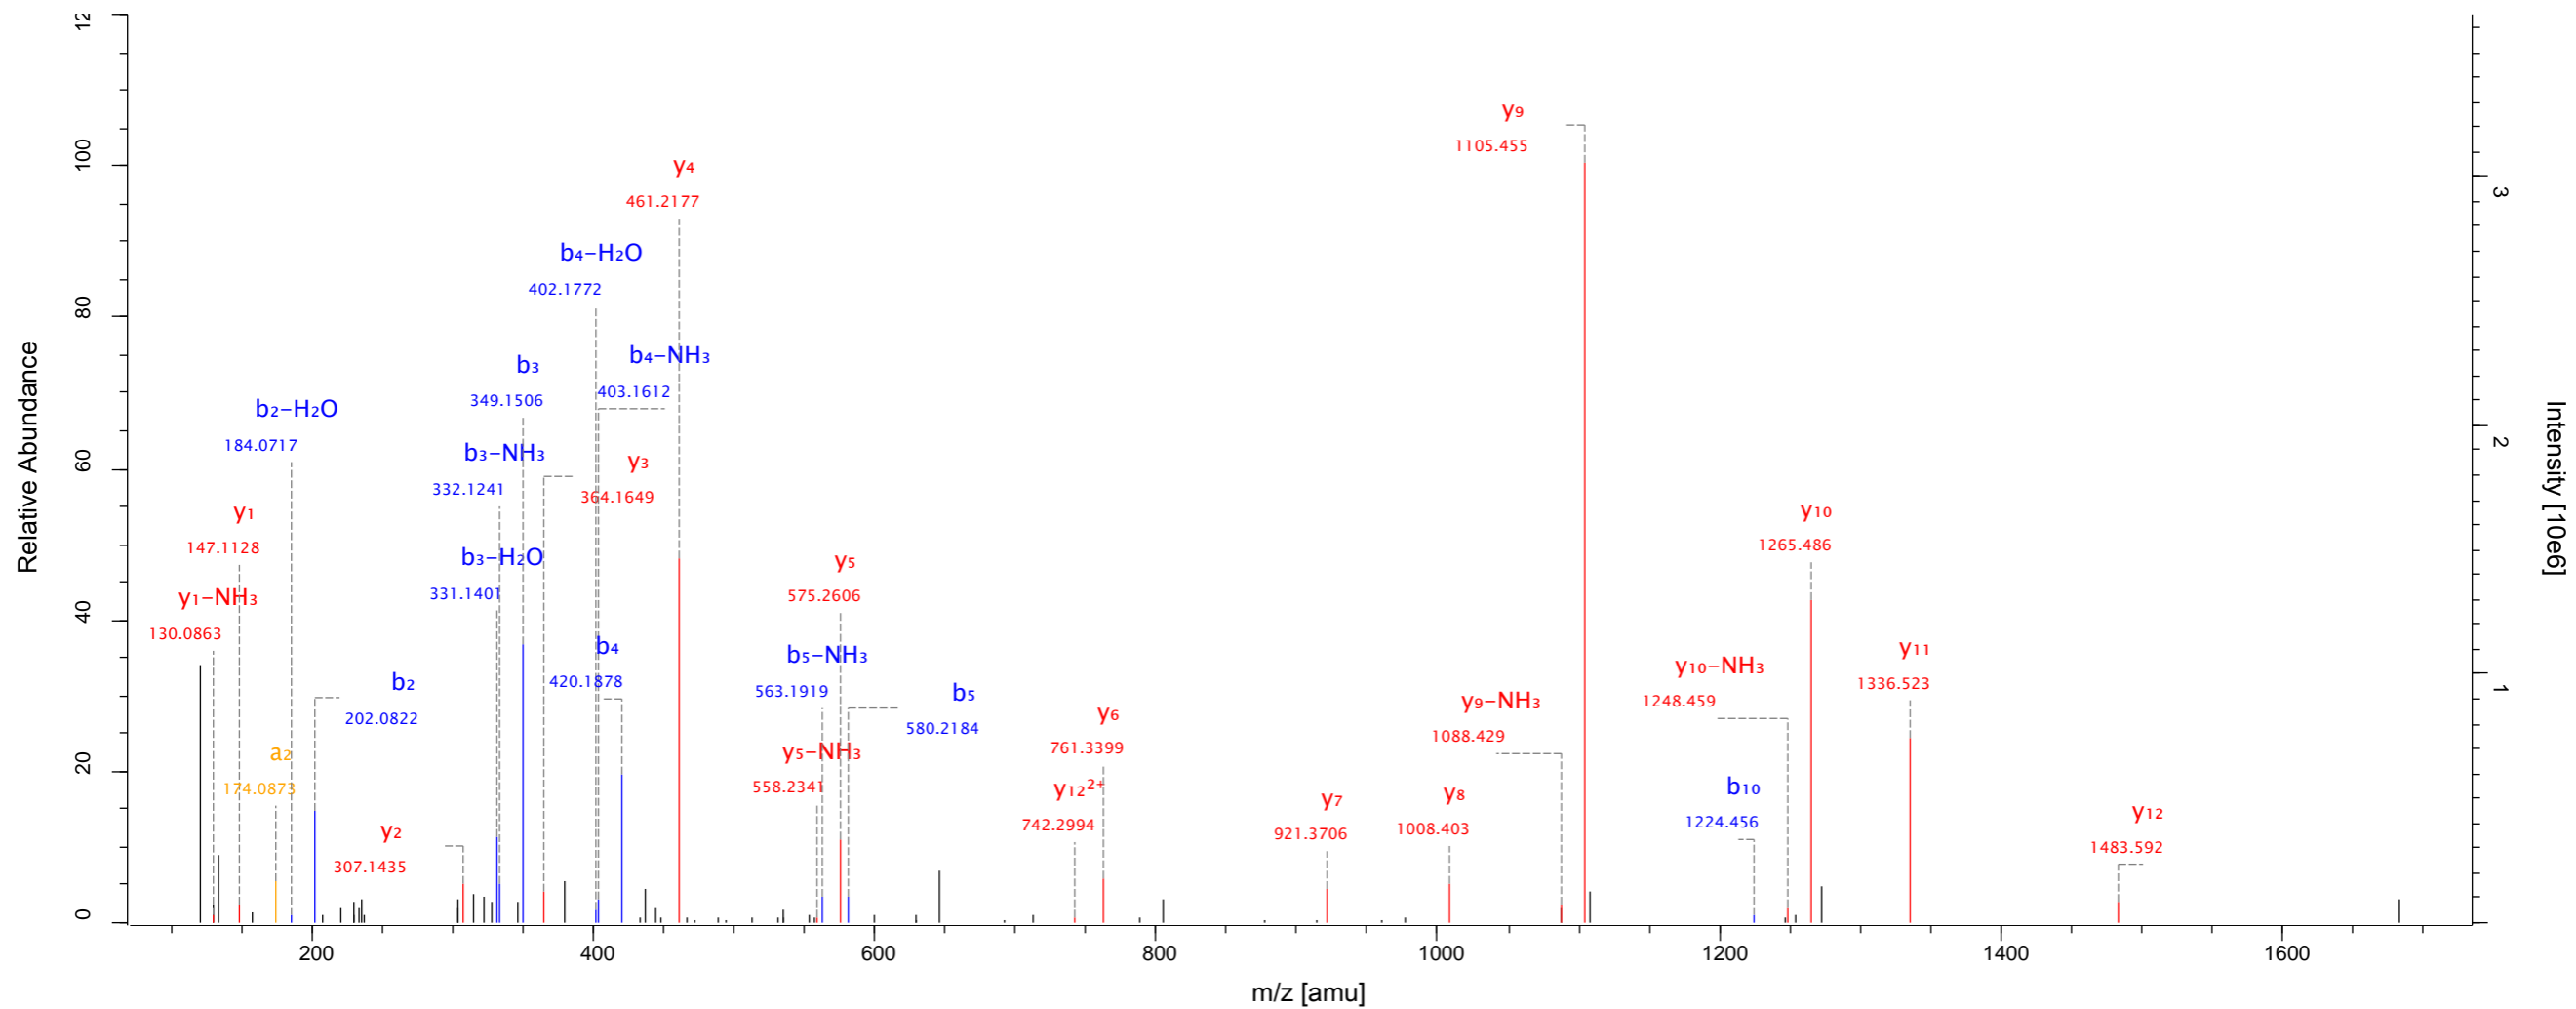

Raw file: 20111212\_EXQ5\_AnMi\_QC\_HCMVp1\_18  
Scan number: 28228  
Protein: ORFL47W.iORF1 + NC\_006273.2[21305,21601]+ <unknown description>  
Peptide score: 90.11  
Method: FTMS; HCD

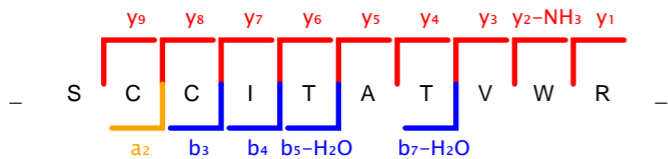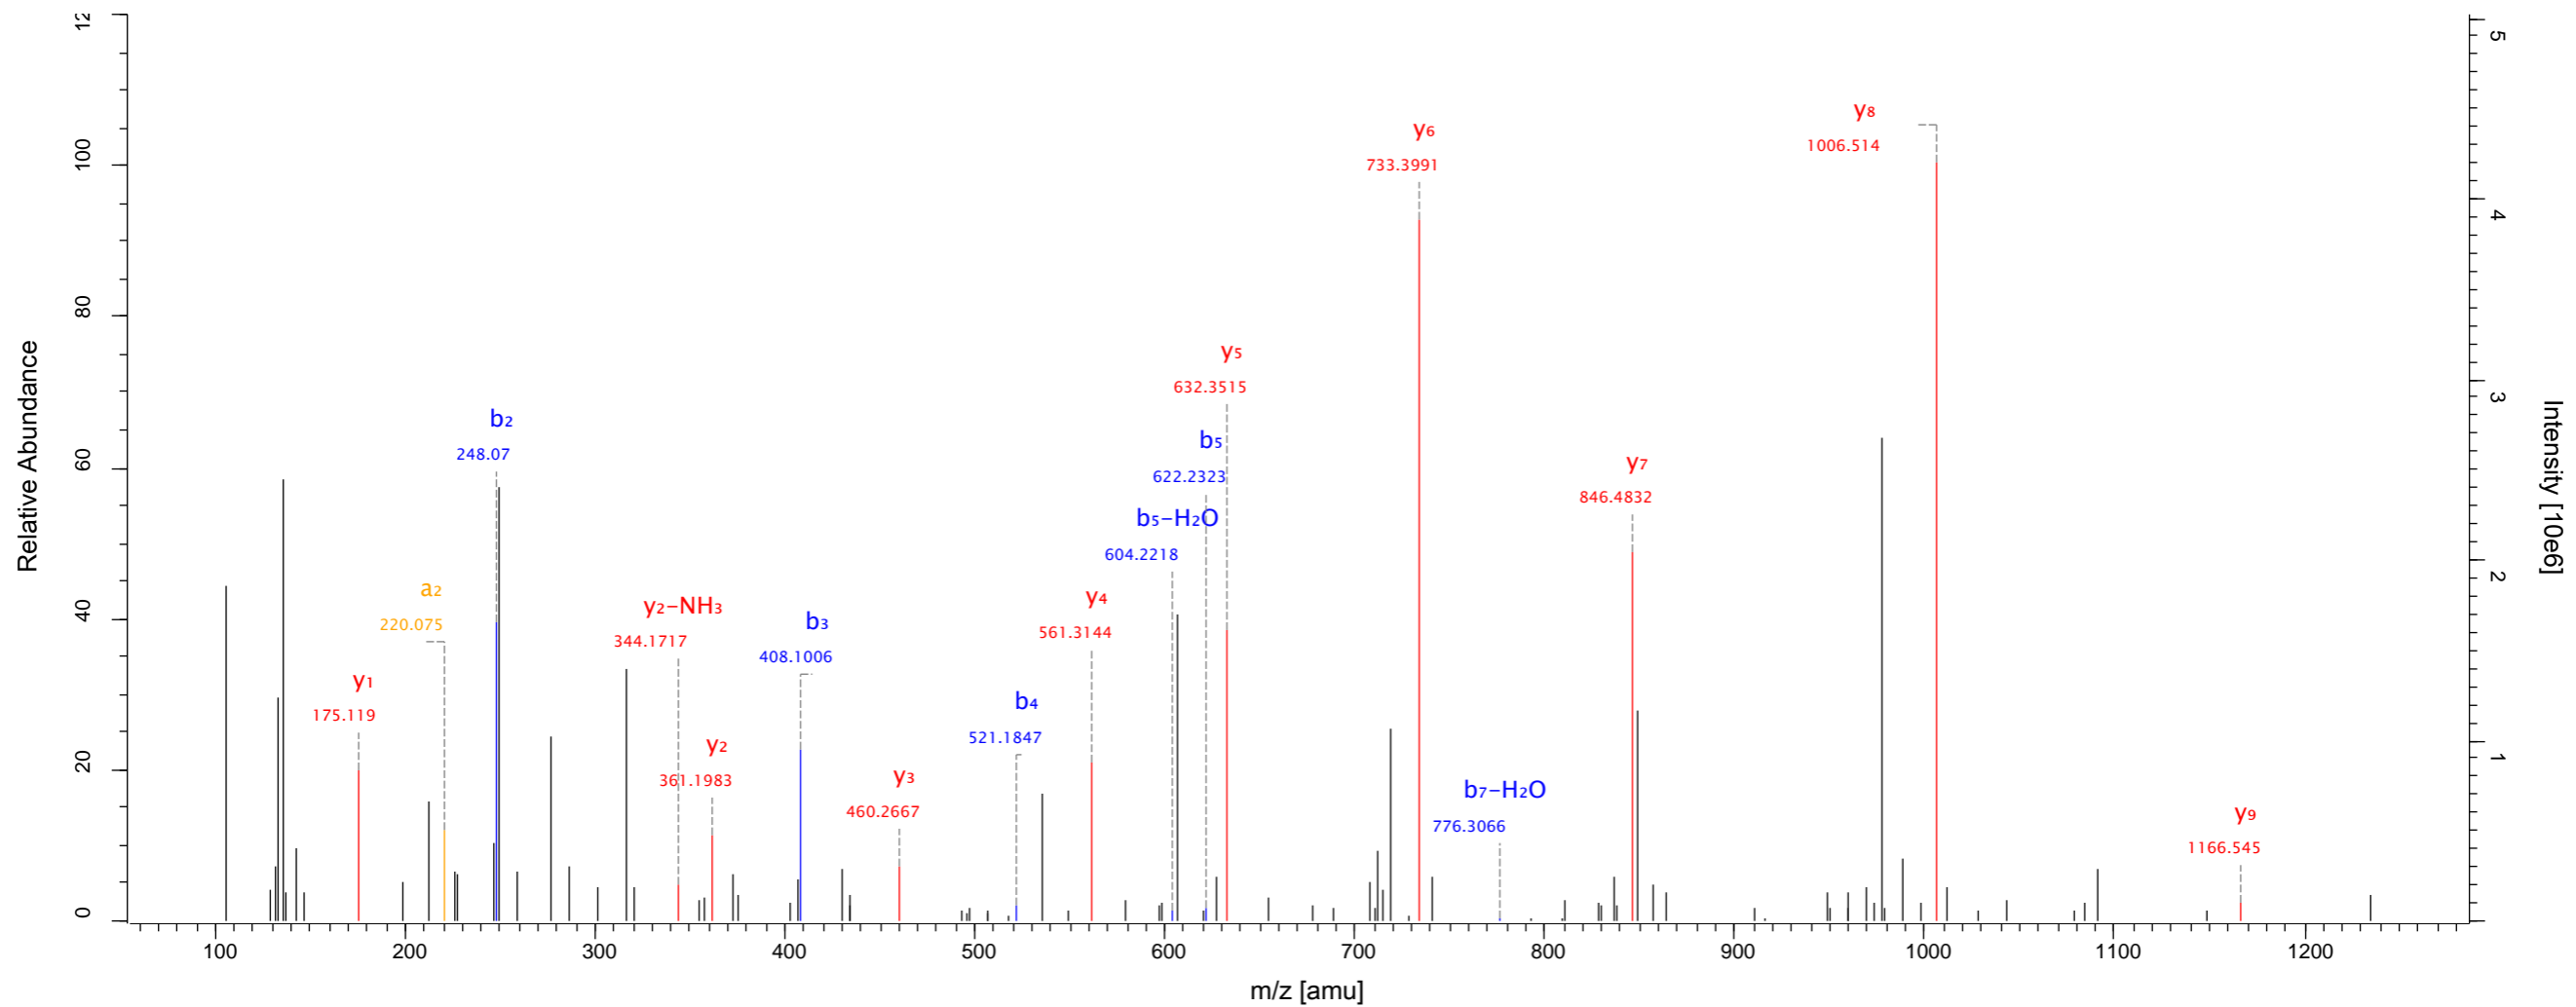



Raw file: 20111212\_EXQ5\_AnMi\_QC\_HCMVpl1\_18  
Scan number: 33776  
Protein: ORFL294W + NC\_006273.2[183230,193441]+ <unknown description>  
Peptide score: 125.82  
Method: FTMS; HCD

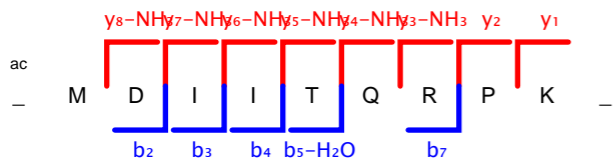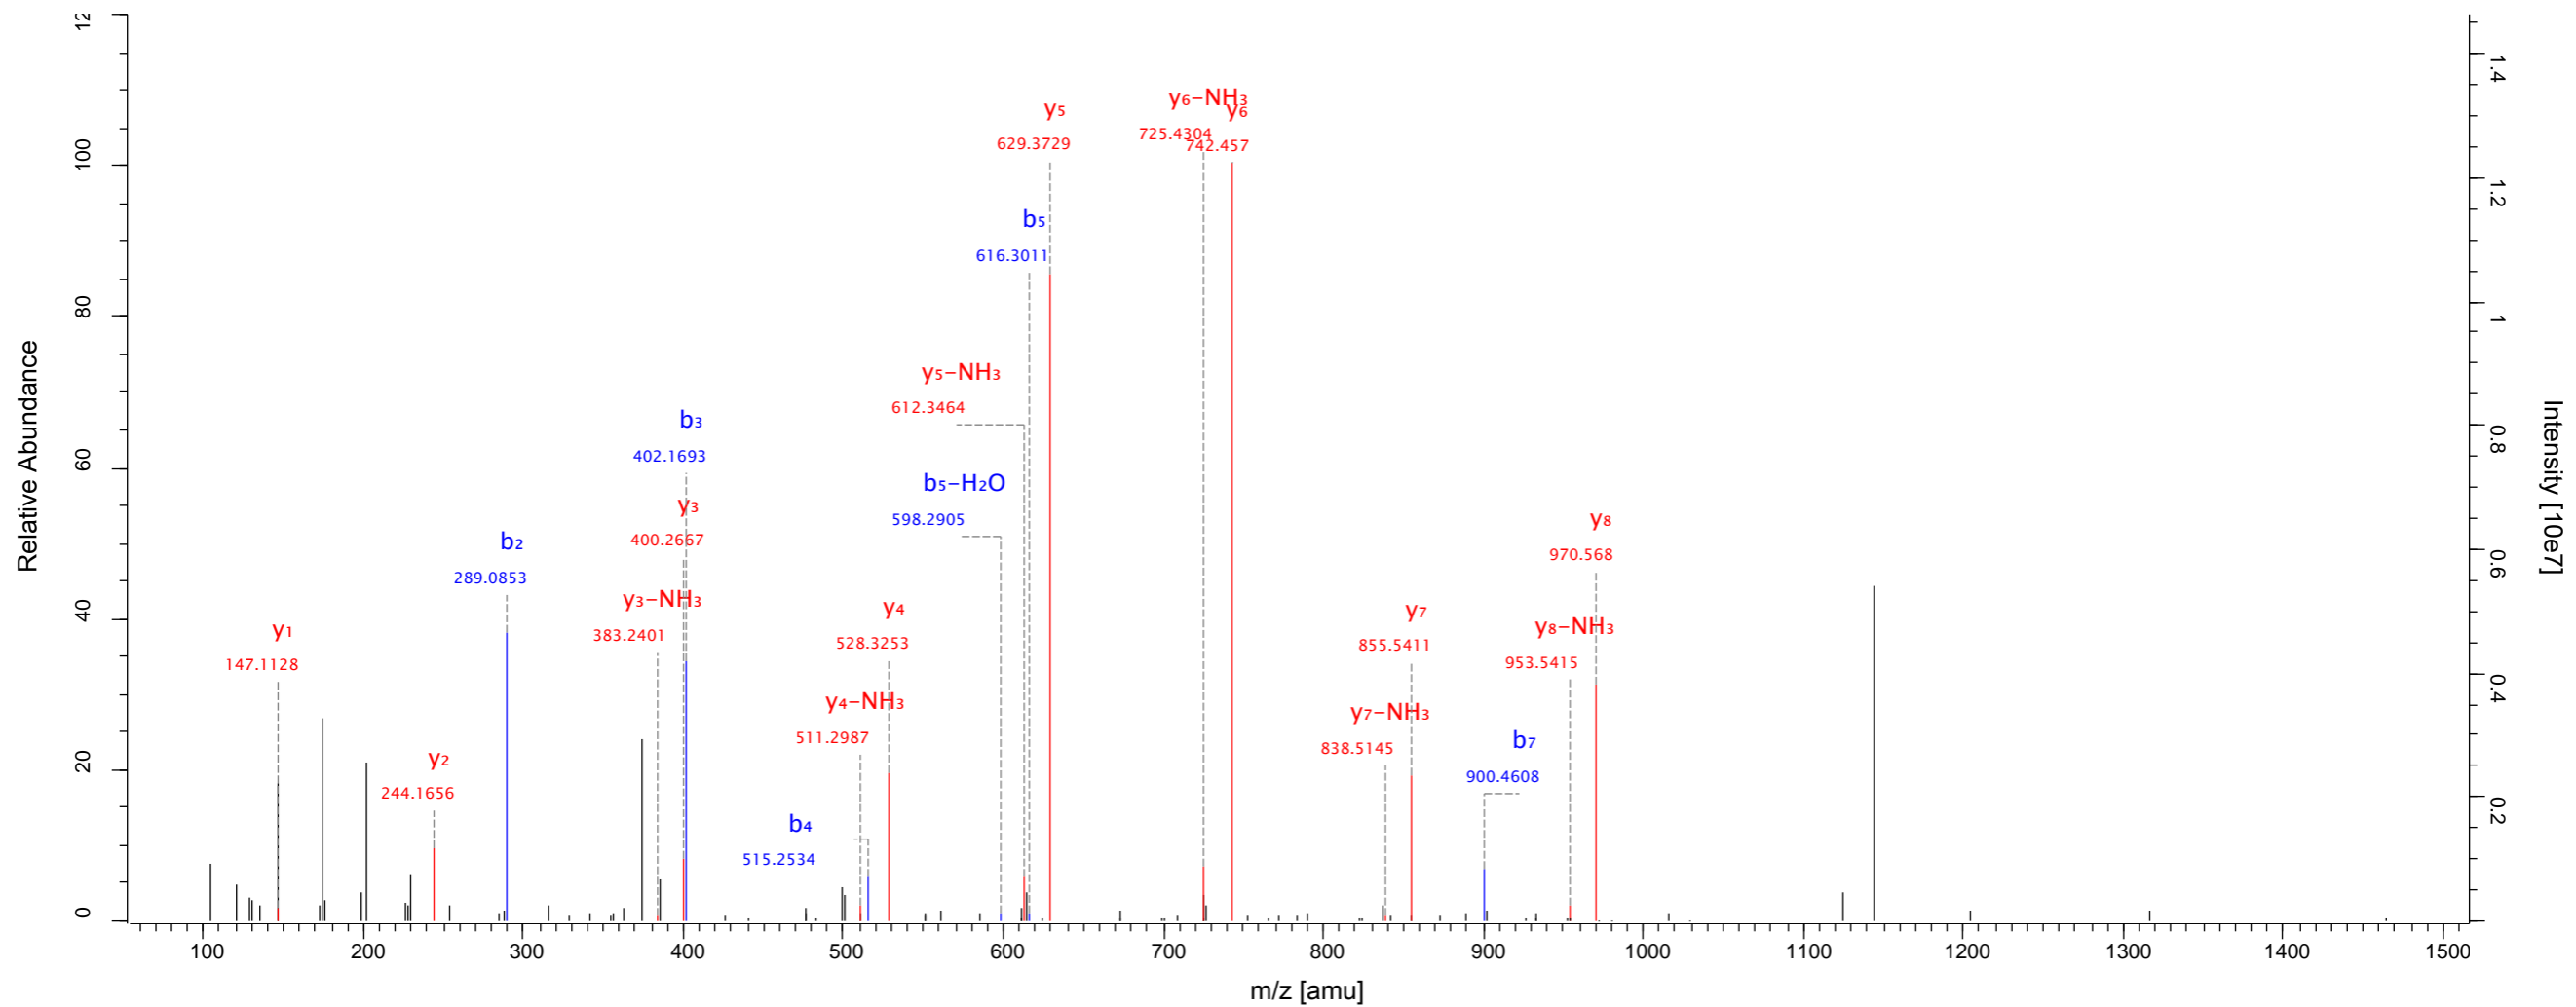

Raw file: 20111212\_EXQ5\_AnMi\_QC\_HCMVp1\_18  
Scan number: 34502  
Protein: ORFL118C - NC\_006273.2[61896,62396]- <unknown description>  
Peptide score: 115.82  
Method: FTMS; HCD

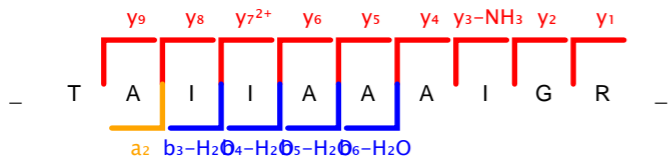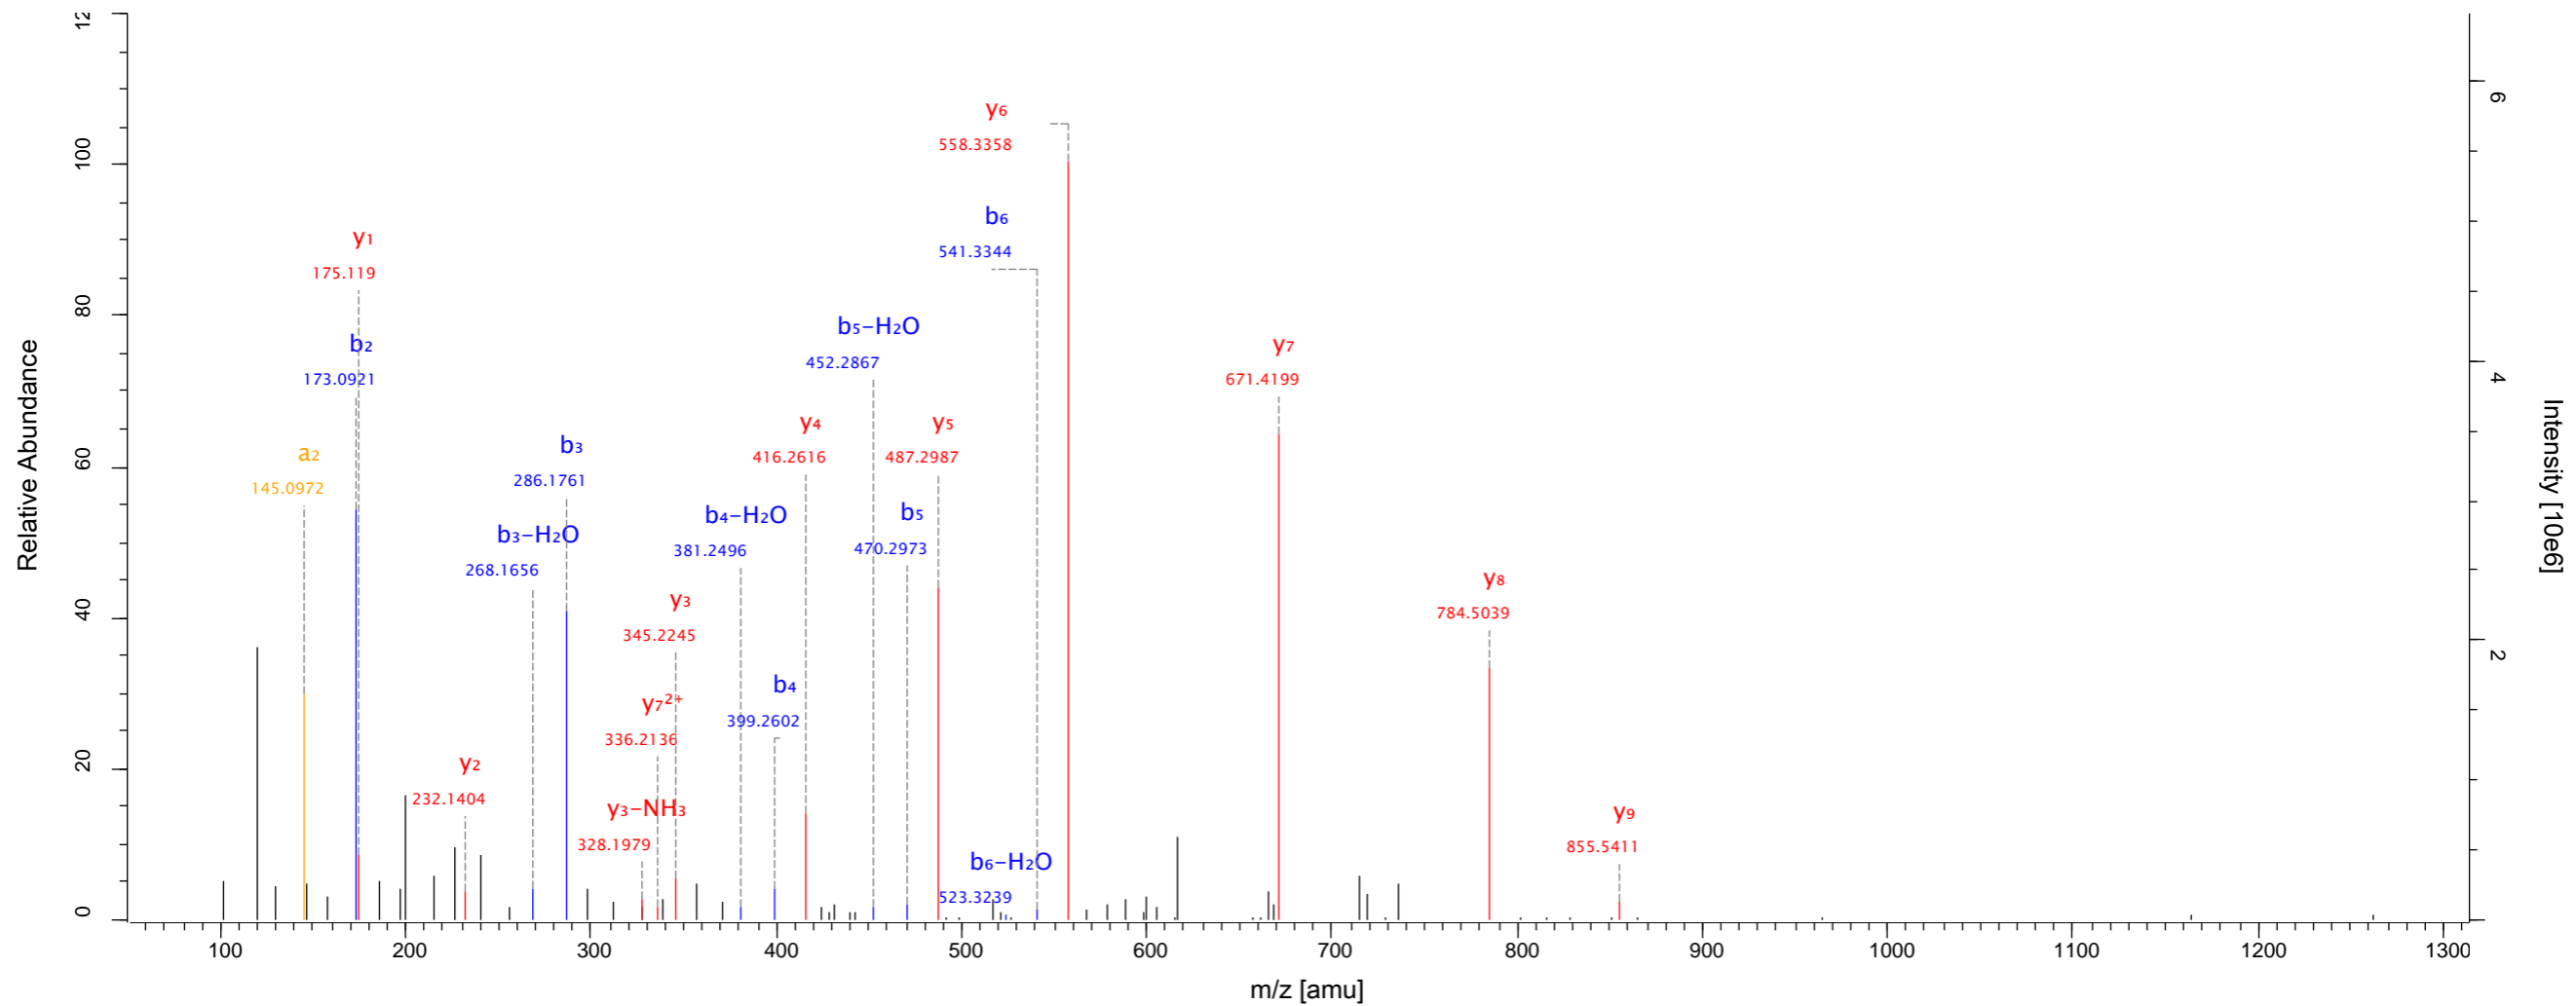

Raw file: 20111212\_EXQ5\_AnMi\_QC\_HCMVp1\_18  
 Scan number: 35767  
 Protein: ORFL161C.iORF2 - NC\_006273.2[101063,101479]- <unknown description>  
 Peptide score: 127.22  
 Method: FTMS; HCD

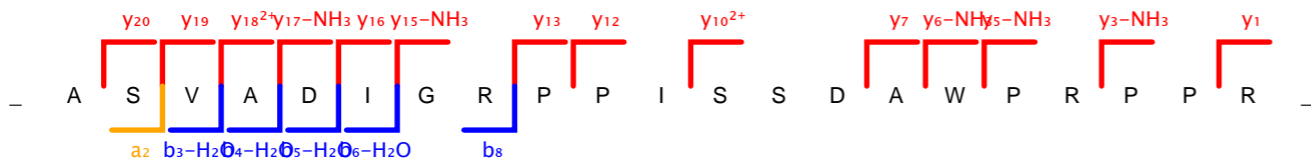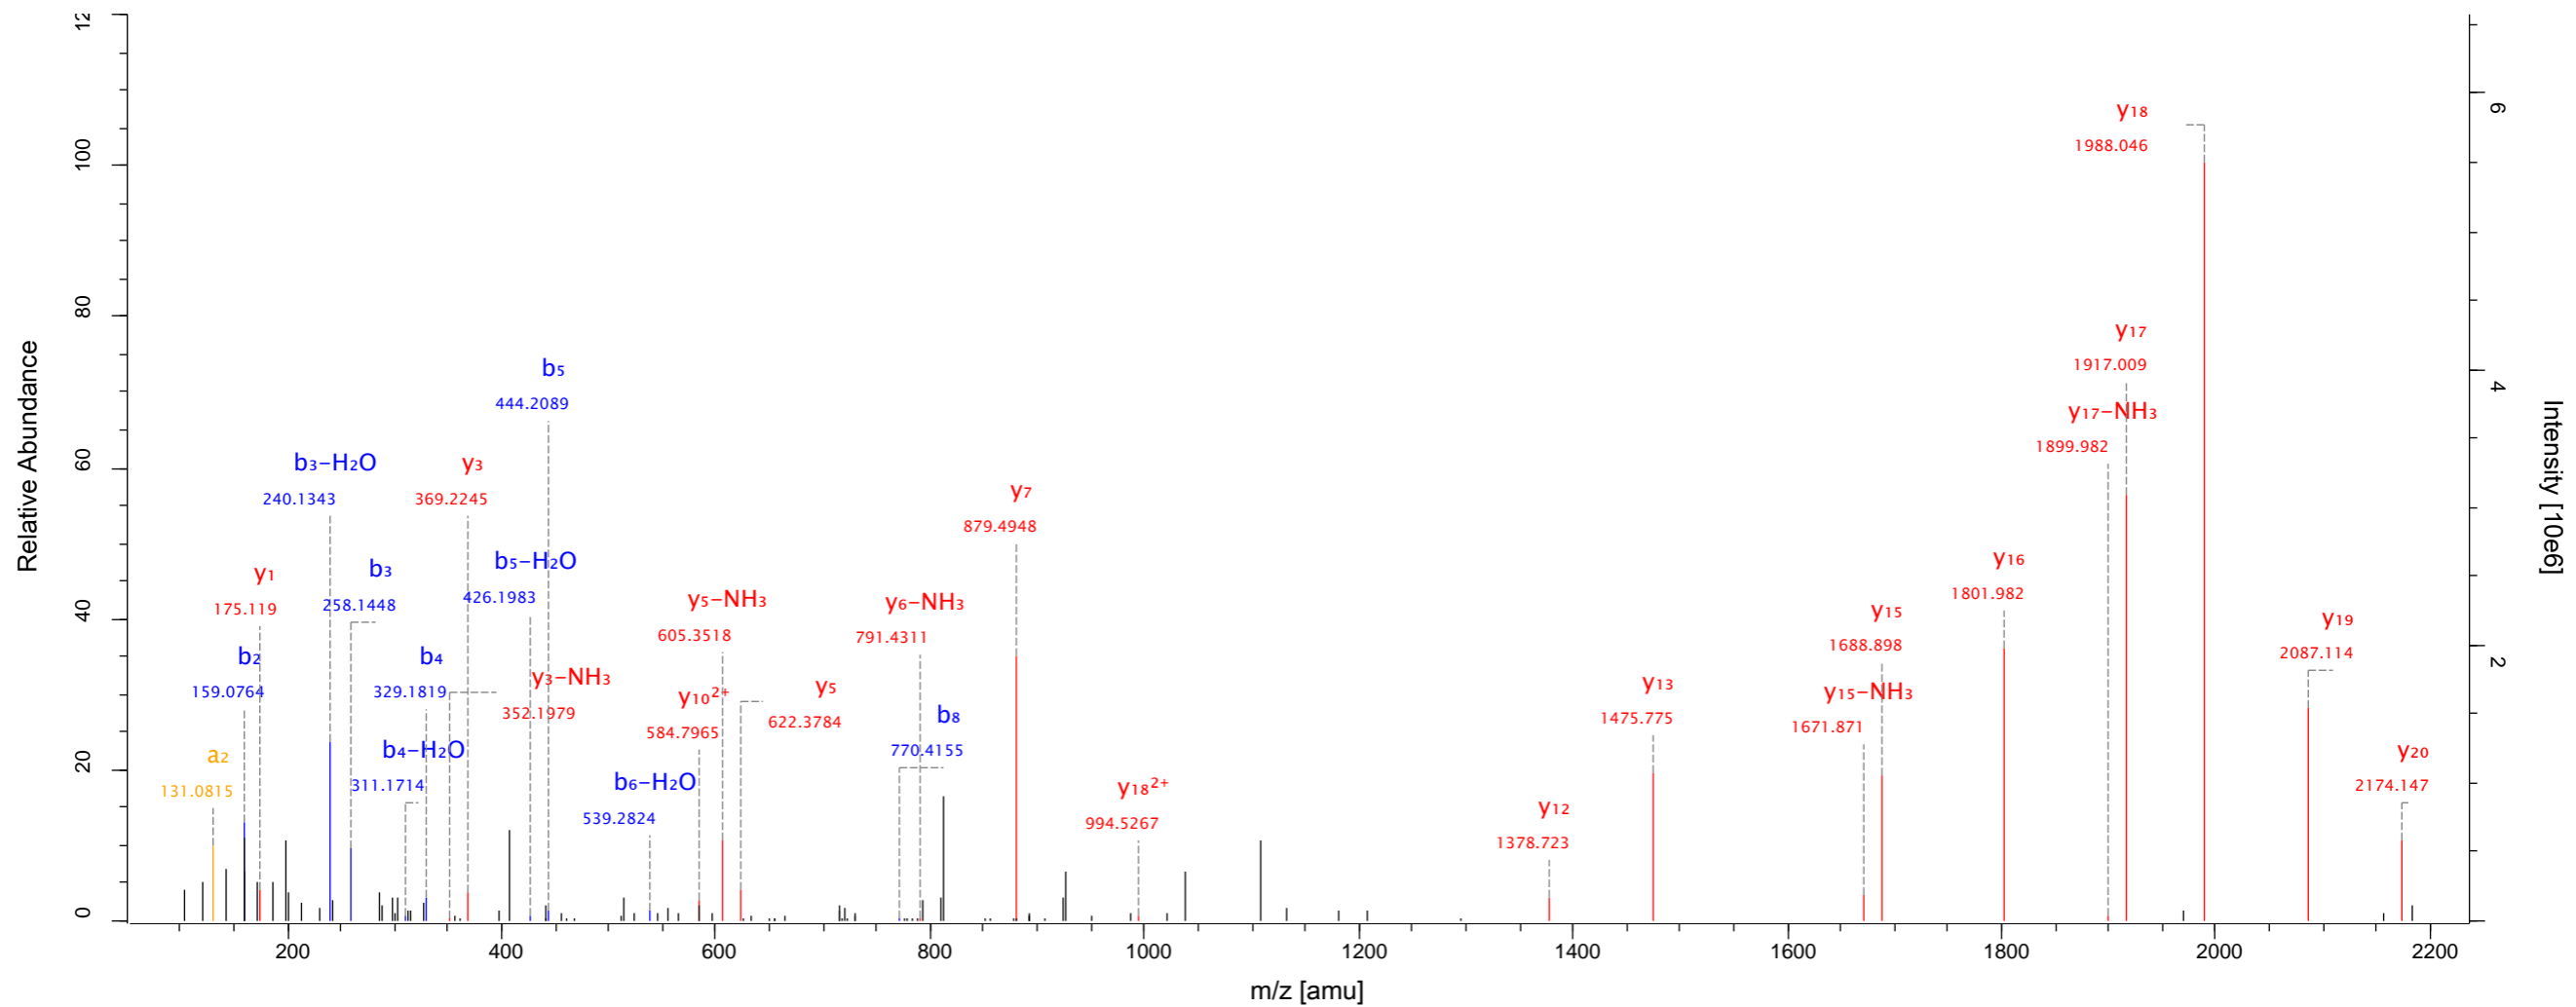

Raw file: 20111212\_EXQ5\_AnMi\_QC\_HCMVp11\_18  
 Scan number: 39931  
 Protein: ORFL27C - NC\_006273.2[7912,13003]- <unknown description>; ORFL27C.iORF1 - NC\_006273.2[7912,8184]- <unknown description>  
 Peptide score: 140.17  
 Method: FTMS; HCD

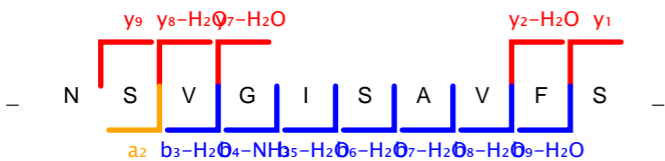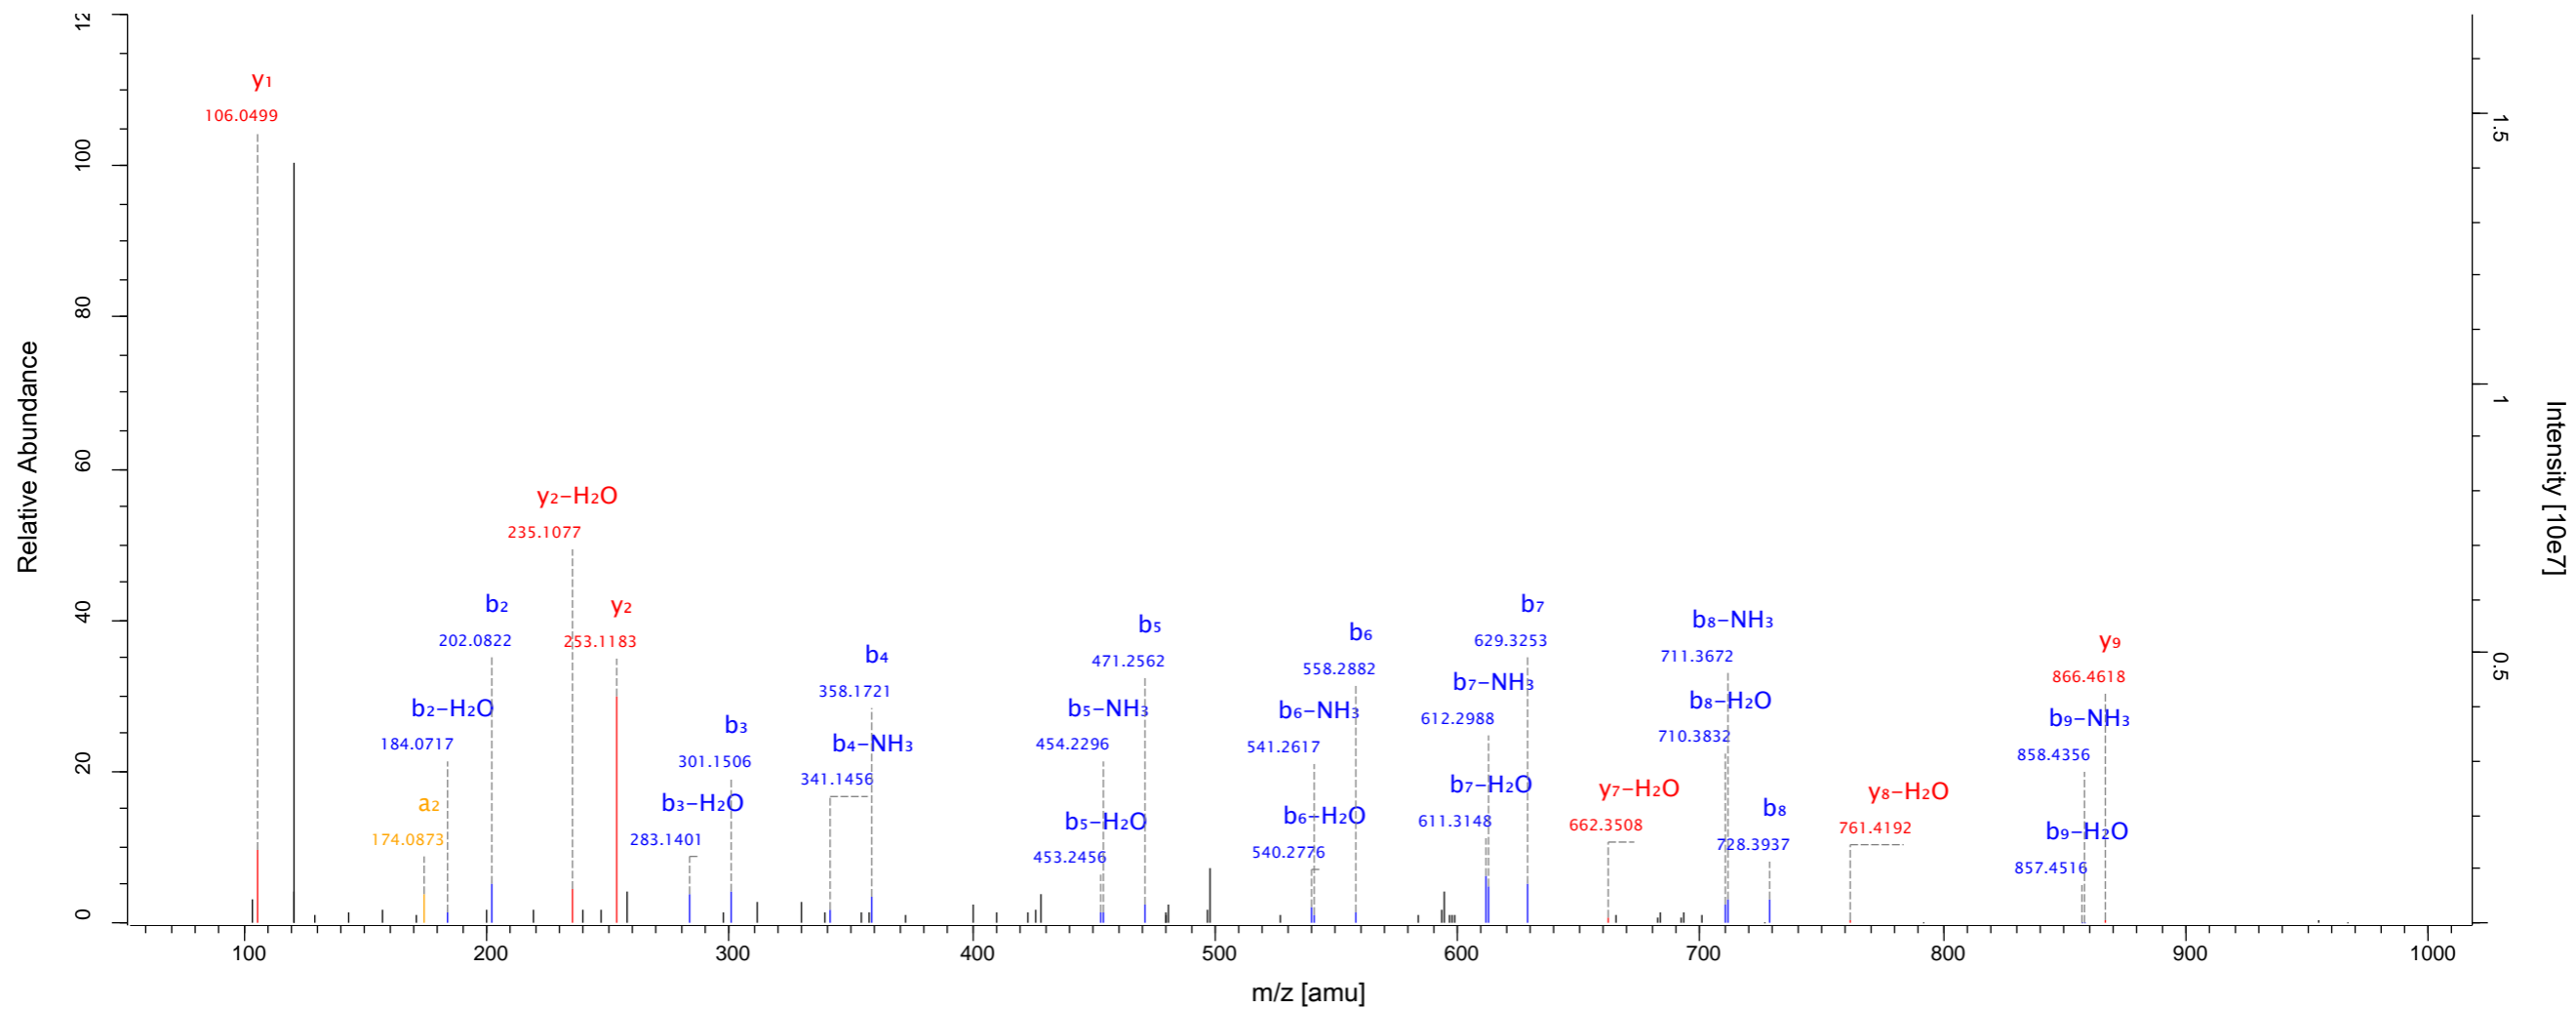

Raw file: 20111212\_EXQ5\_AnMi\_QC\_HCMVp1\_18  
Scan number: 41493  
Protein: ORFL73C - NC\_006273.2[30581,30946]- <unknown description>  
Peptide score: 170.56  
Method: FTMS; HCD

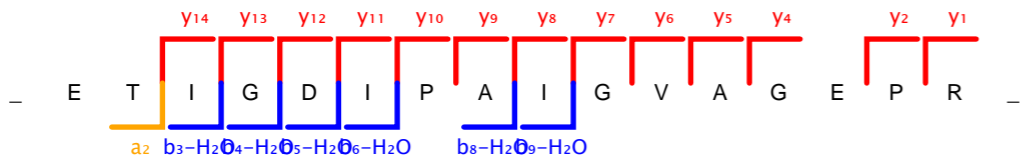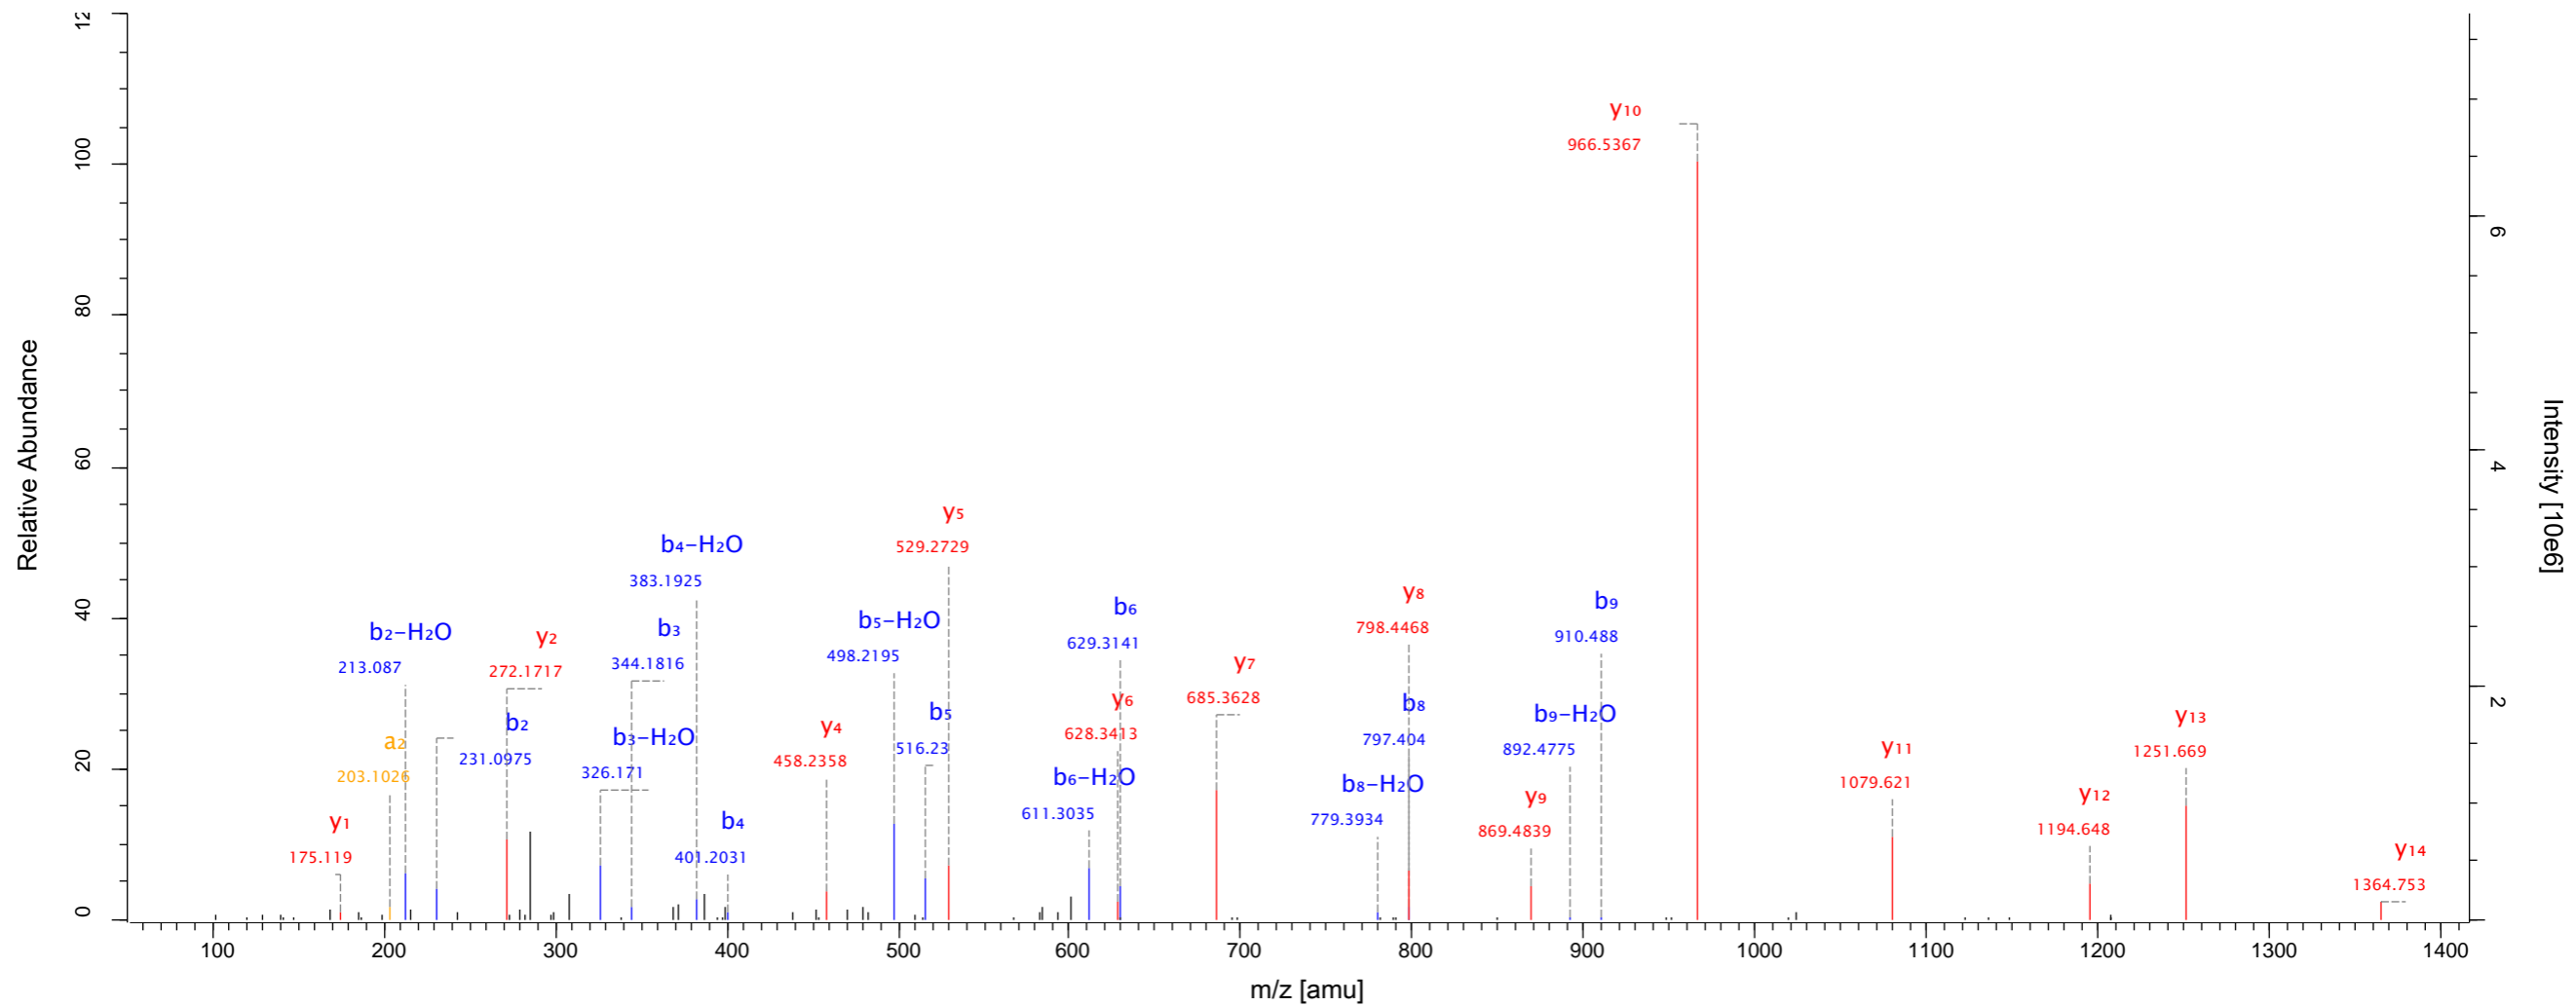

Raw file: 20111212\_EXQ5\_AnMi\_QC\_HCMVp11\_18  
Scan number: 41766  
Protein: ORFL142W + NC\_006273.2[78726,79031]+ <unknown description>  
Peptide score: 54.6  
Method: FTMS; HCD

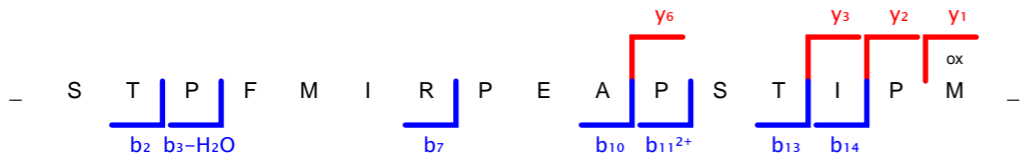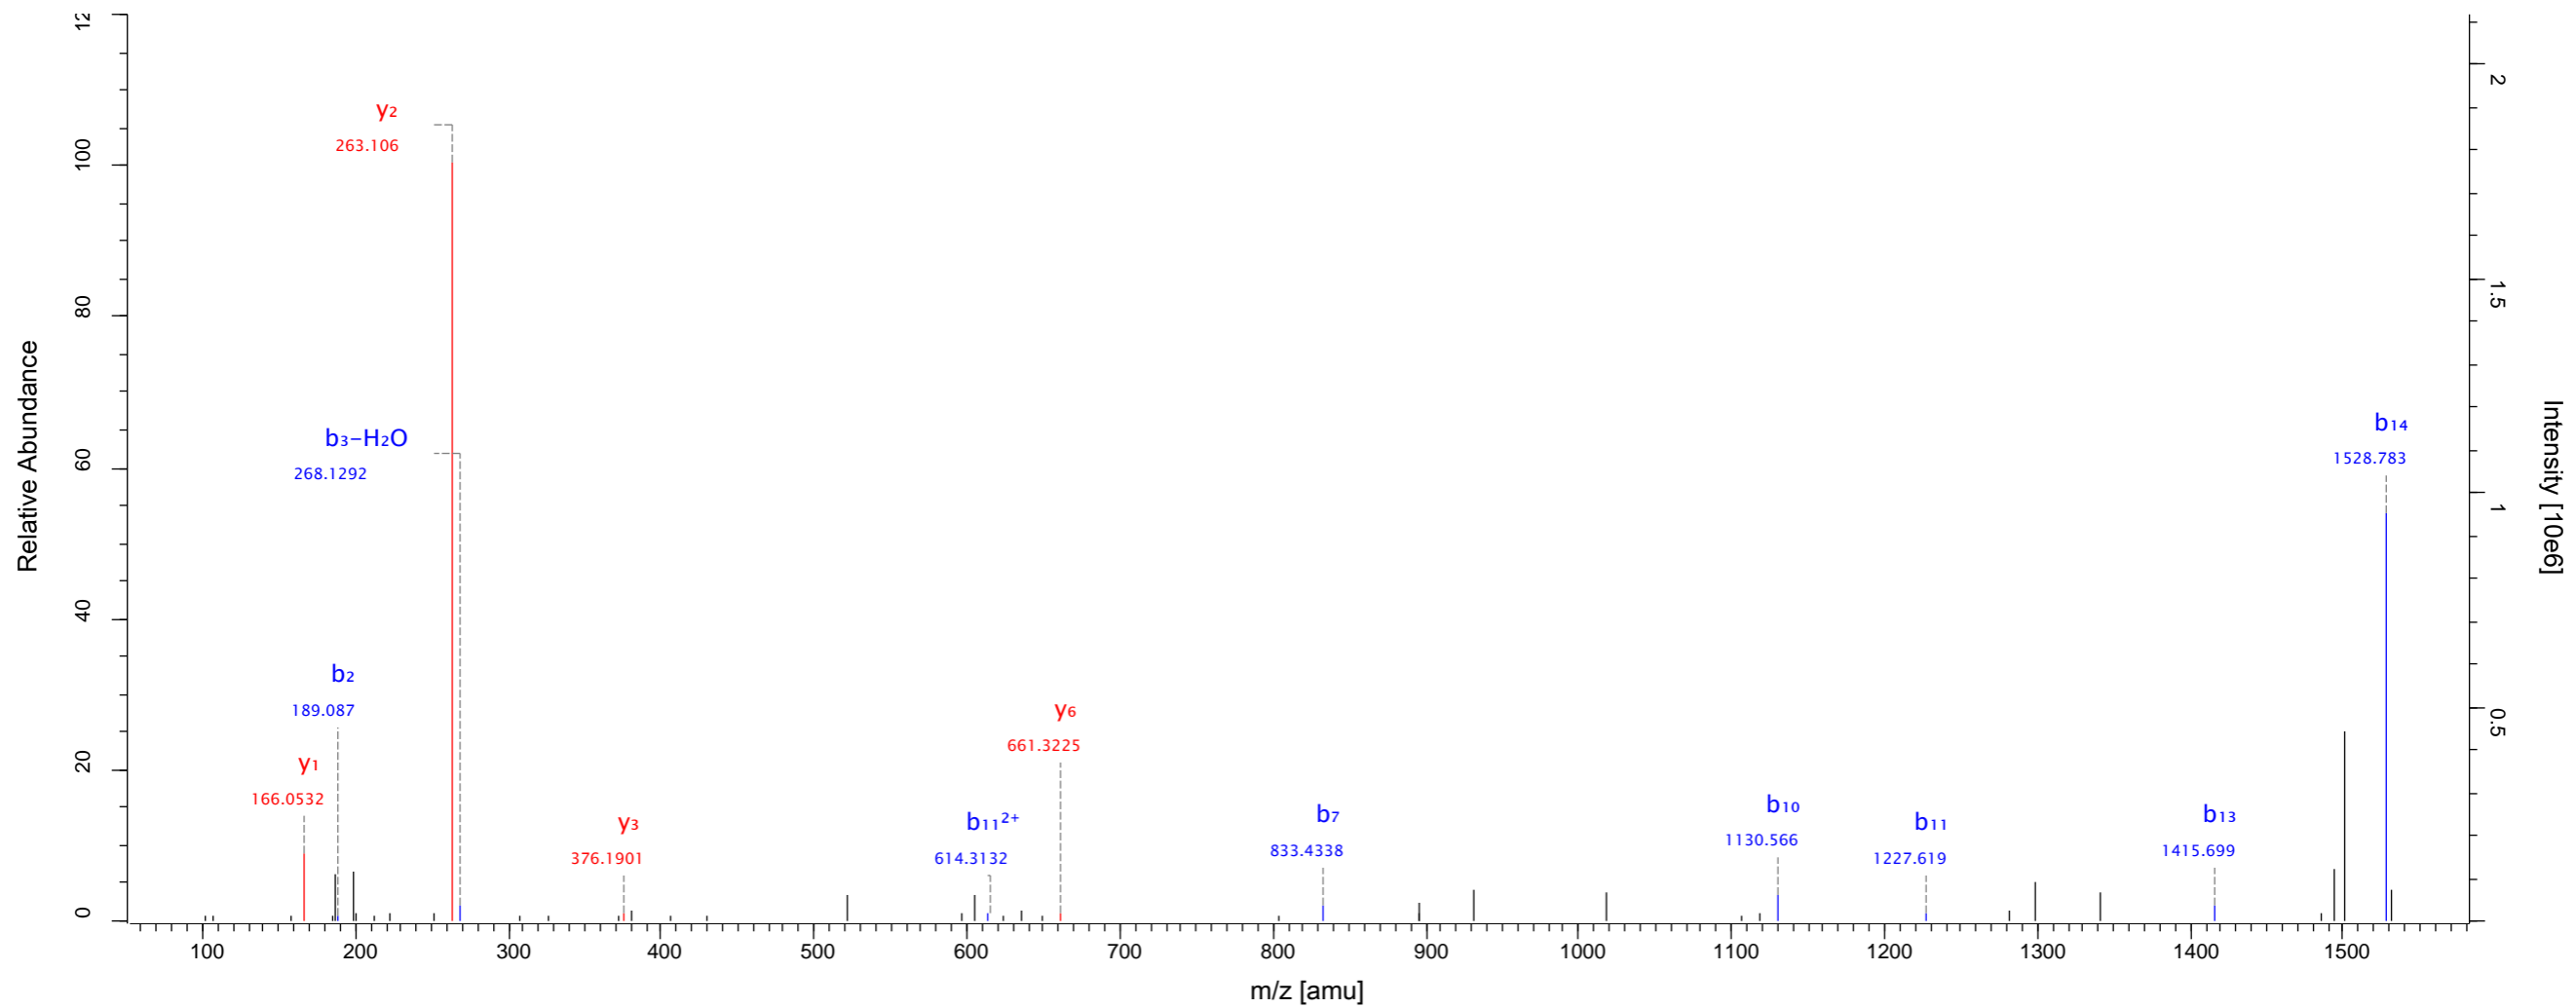

Raw file: 20111212\_EXQ5\_AnMi\_QC\_HCMVp1\_18  
 Scan number: 45522  
 Protein: ORFL253W.IORF3 + NC\_006273.2[162059,162286]+ <unknown description>  
 Peptide score: 66.25  
 Method: FTMS; HCD

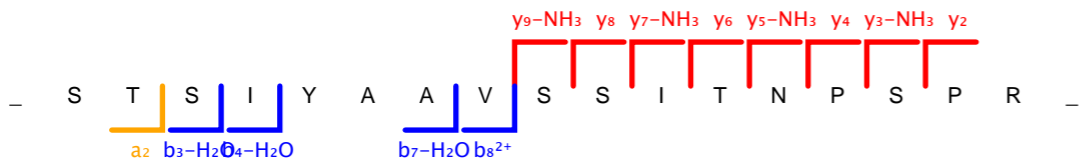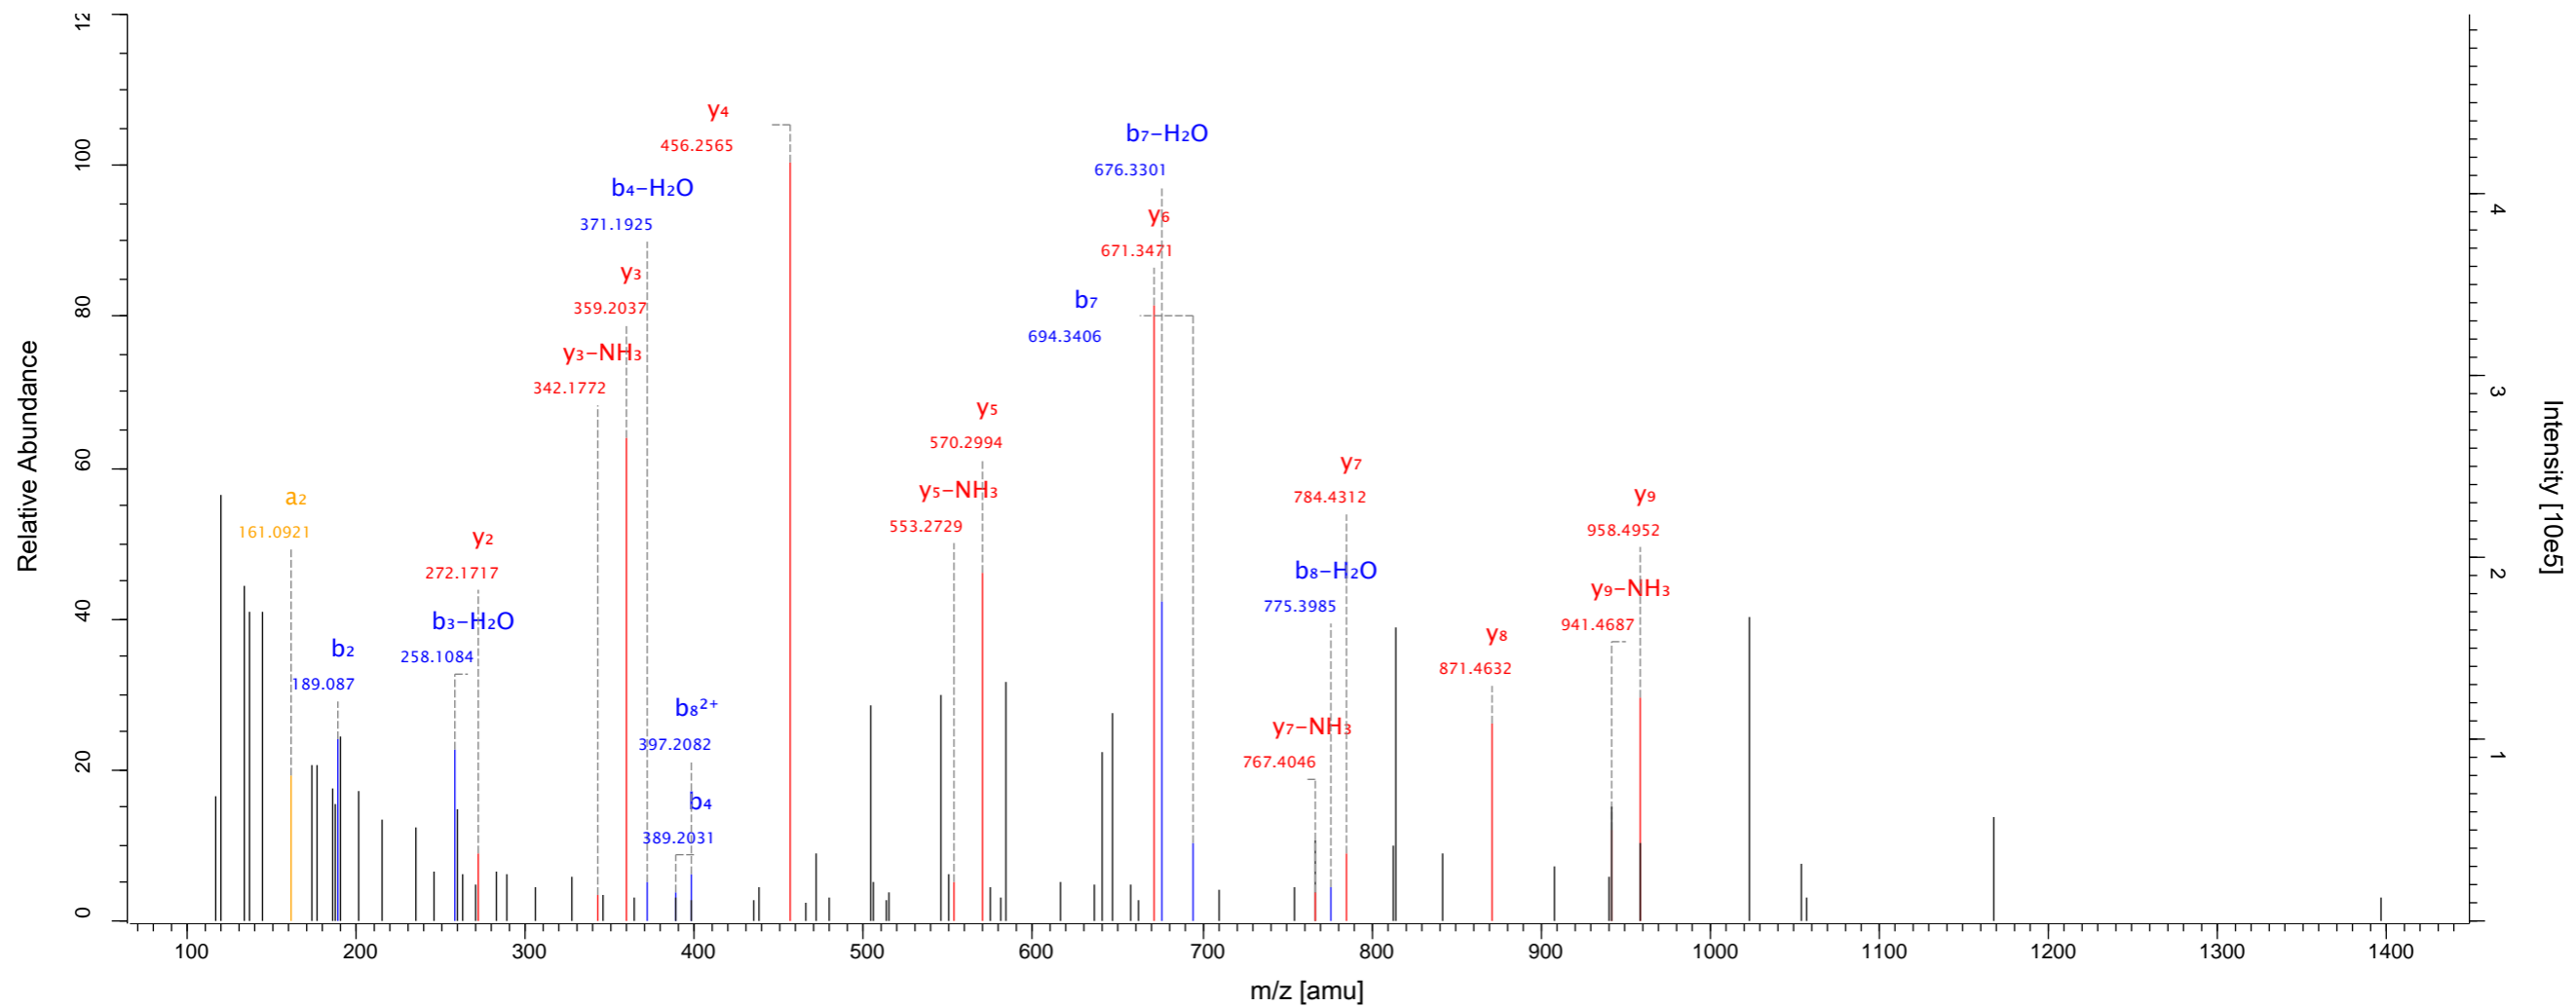

Raw file: 20111212\_EXQ5\_AnMi\_QC\_HCMVp1\_18  
 Scan number: 52334  
 Protein: ORFL161C.iORF2 - NC\_006273.2[101063,101479]- <unknown description>  
 Peptide score: 94.88  
 Method: FTMS; HCD

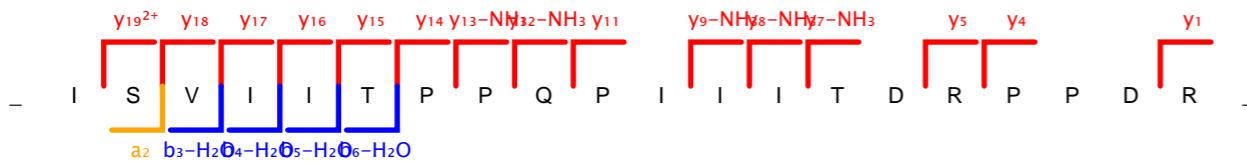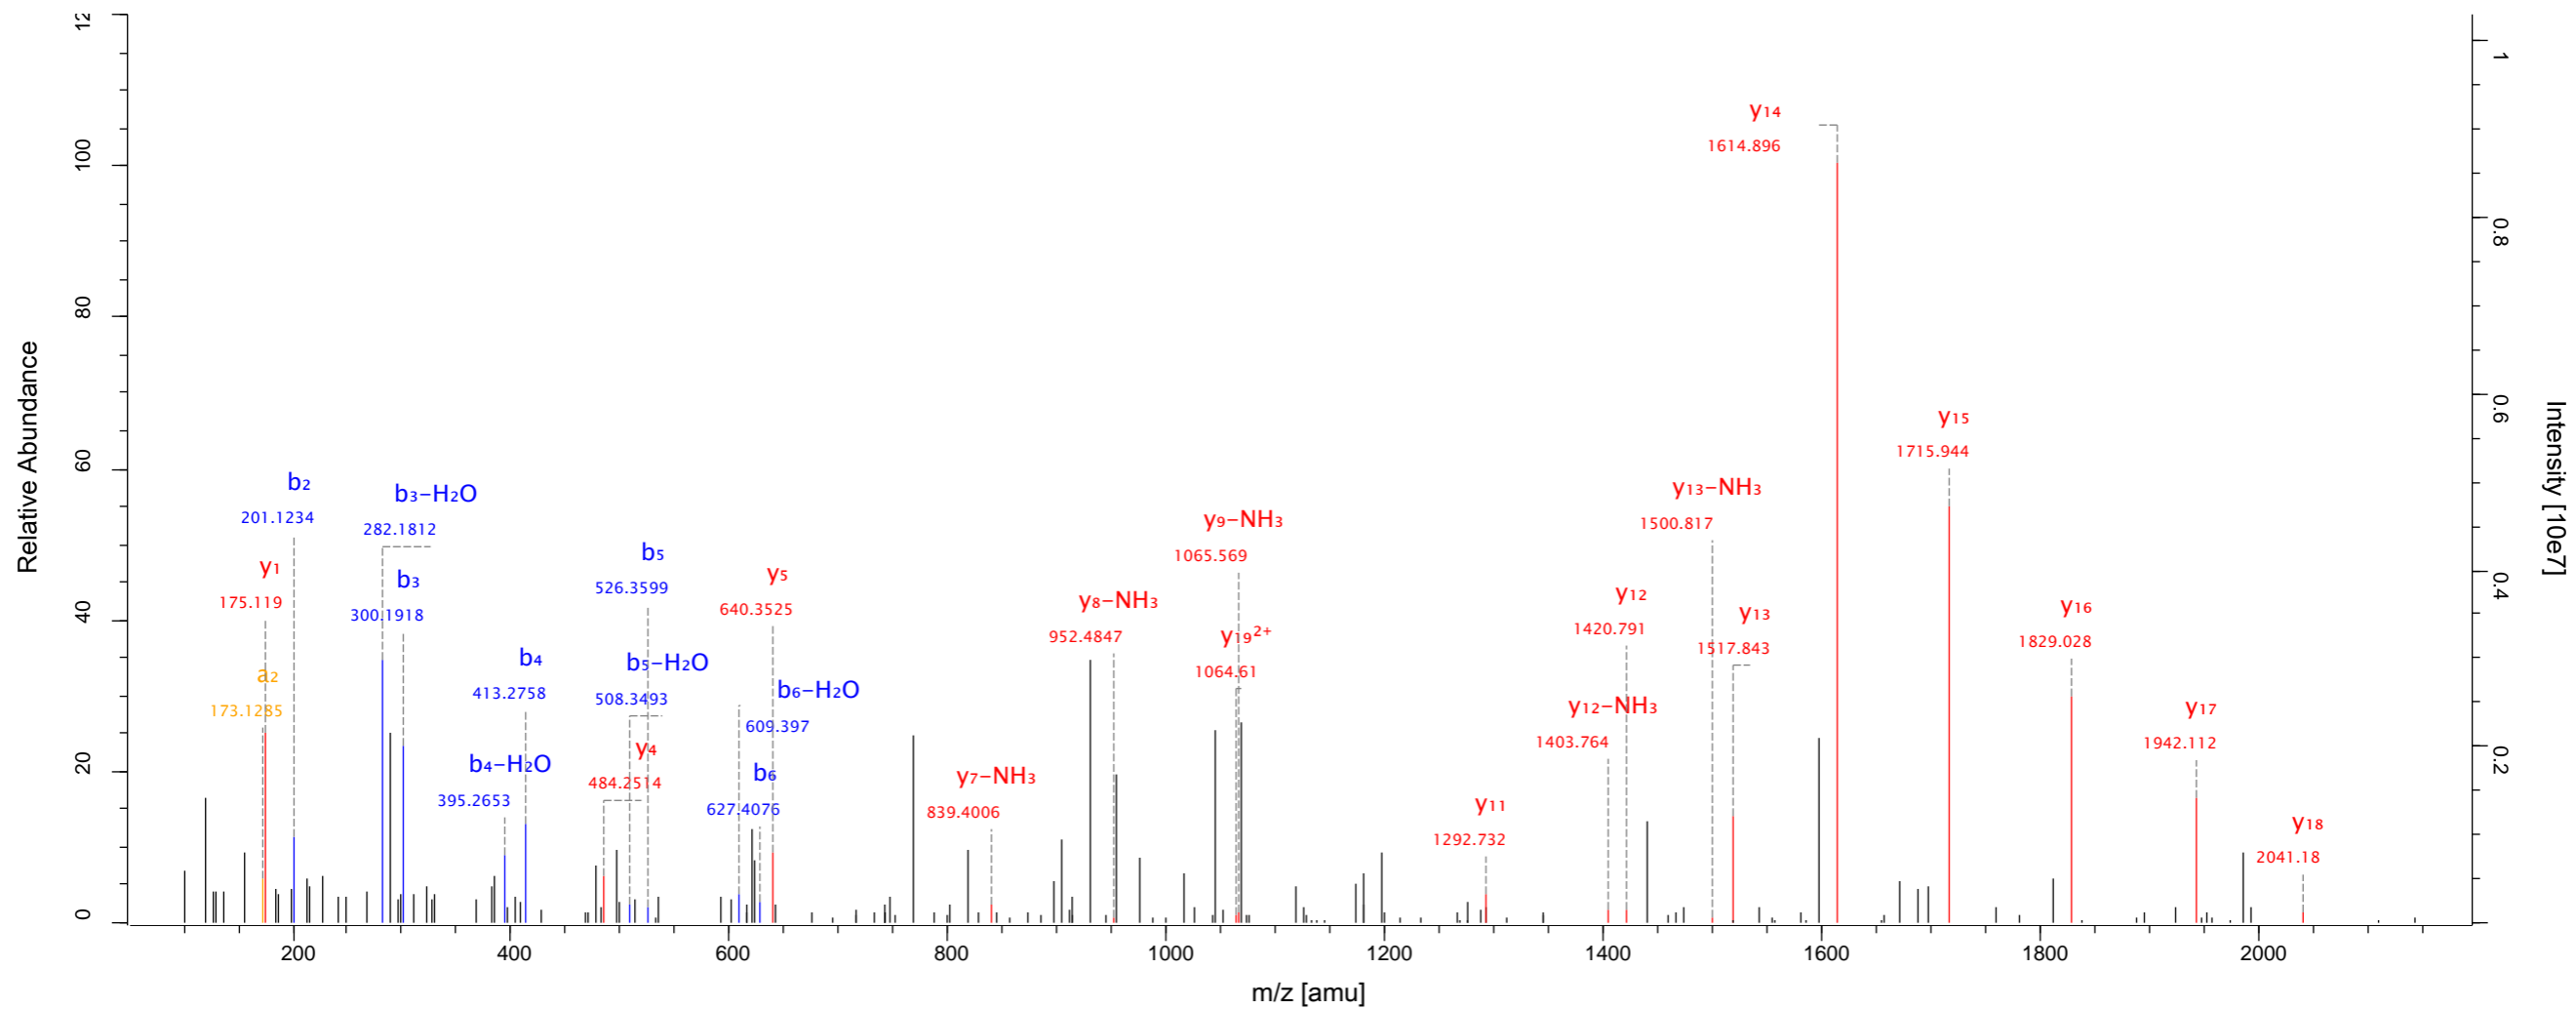



Raw file: 20111212\_EXQ5\_AnMi\_QC\_HCMVp1\_18  
 Scan number: 52490  
 Protein: ORFL106C - NC\_006273.2[53935,54294]- <unknown description>  
 Peptide score: 201.6  
 Method: FTMS; HCD

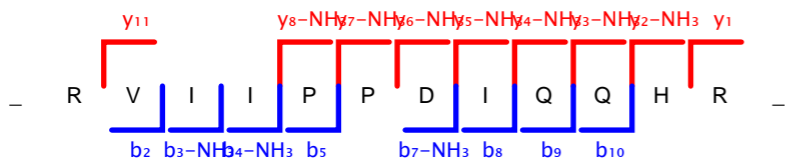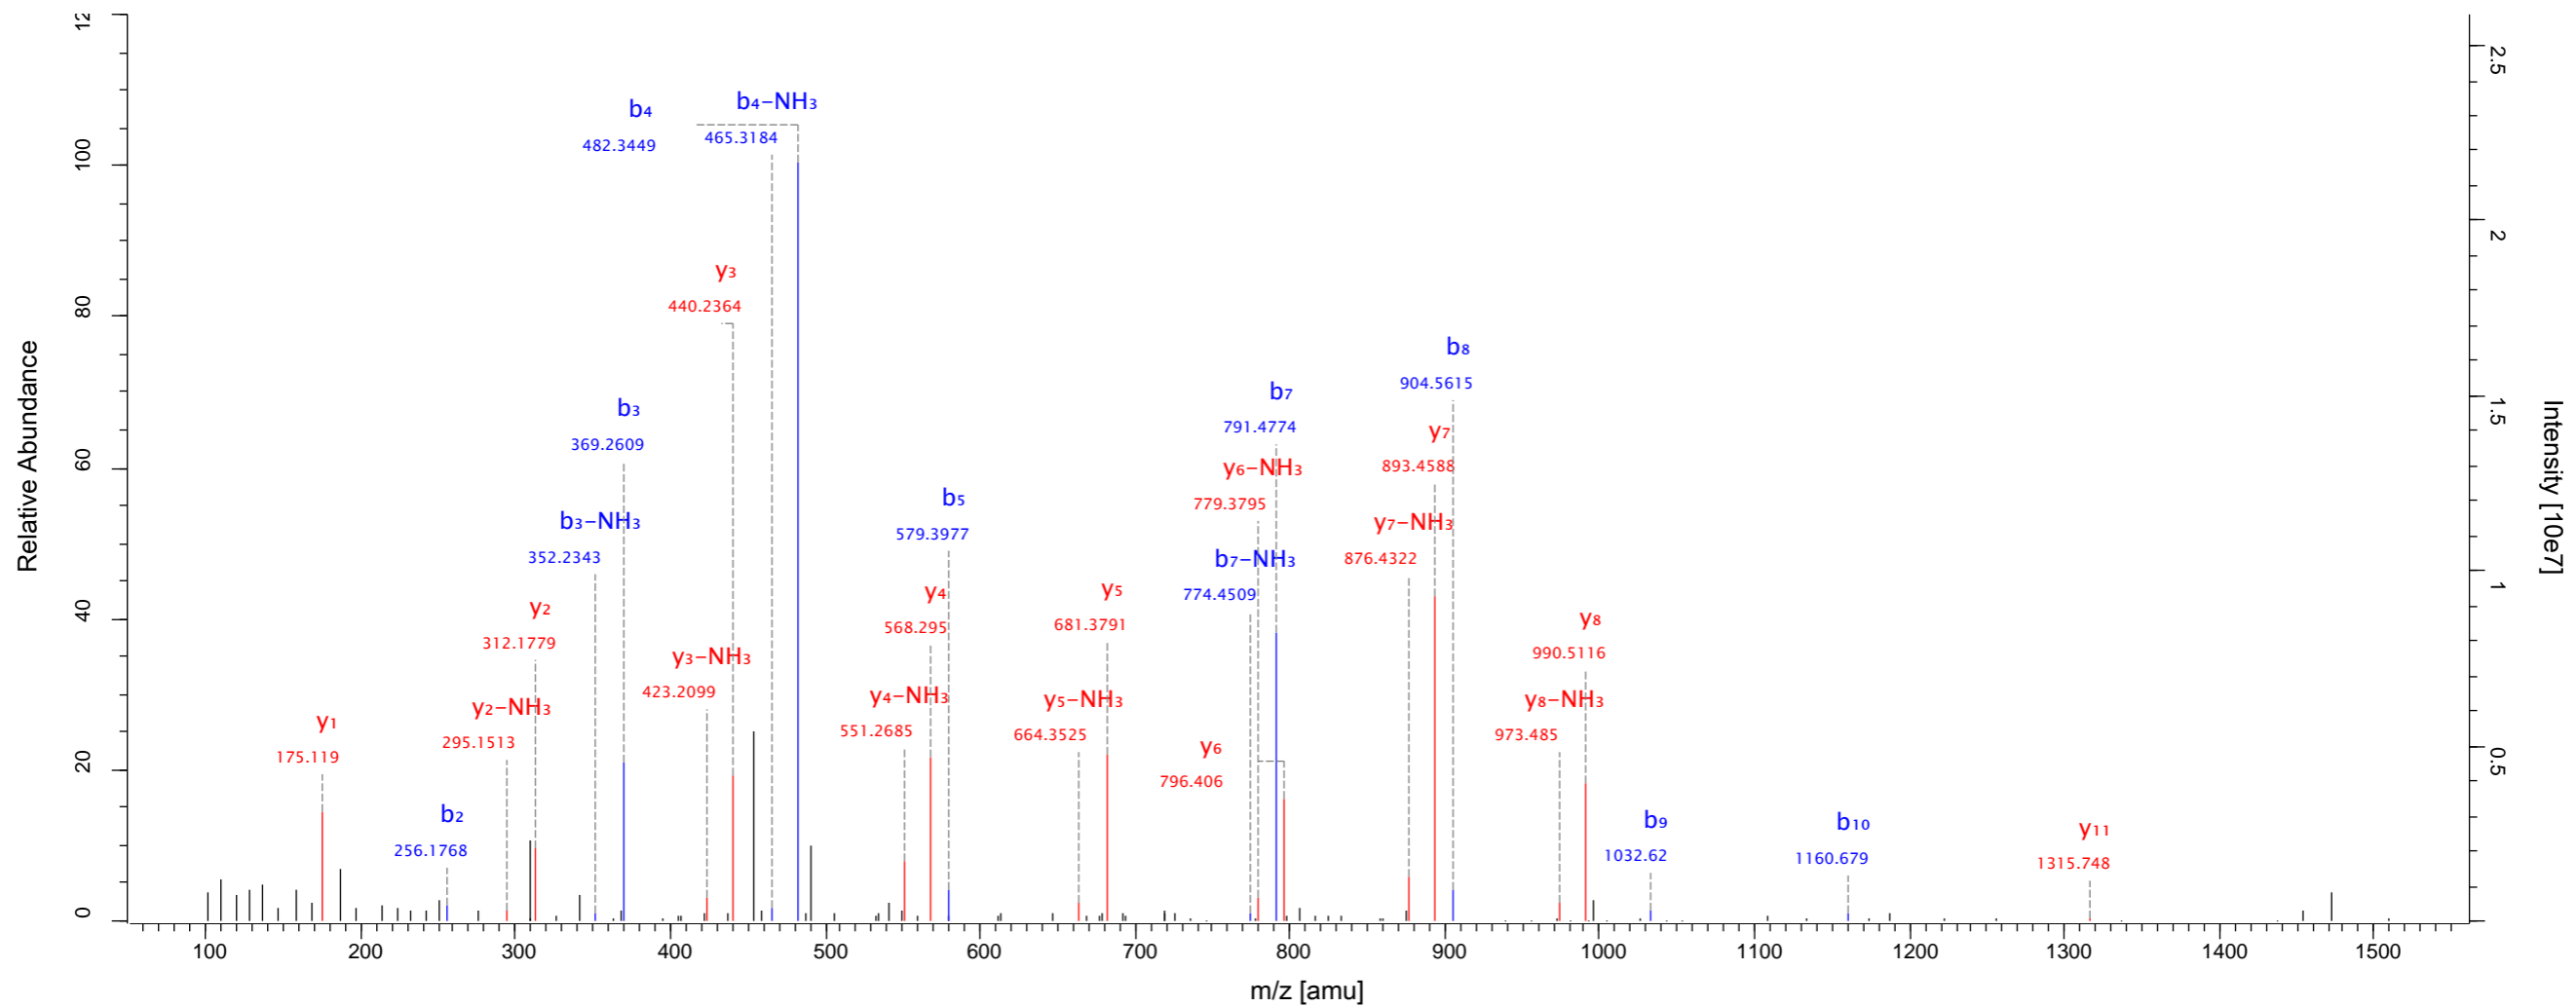

Raw file: 20111212\_EXQ5\_AnMi\_QC\_HCMVpl1\_18  
Scan number: 6478  
Protein: ORFL301C - NC\_006273.2[185358,185666]- <unknown description>  
Peptide score: 118.26  
Method: FTMS; HCD

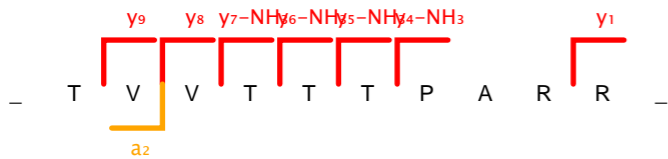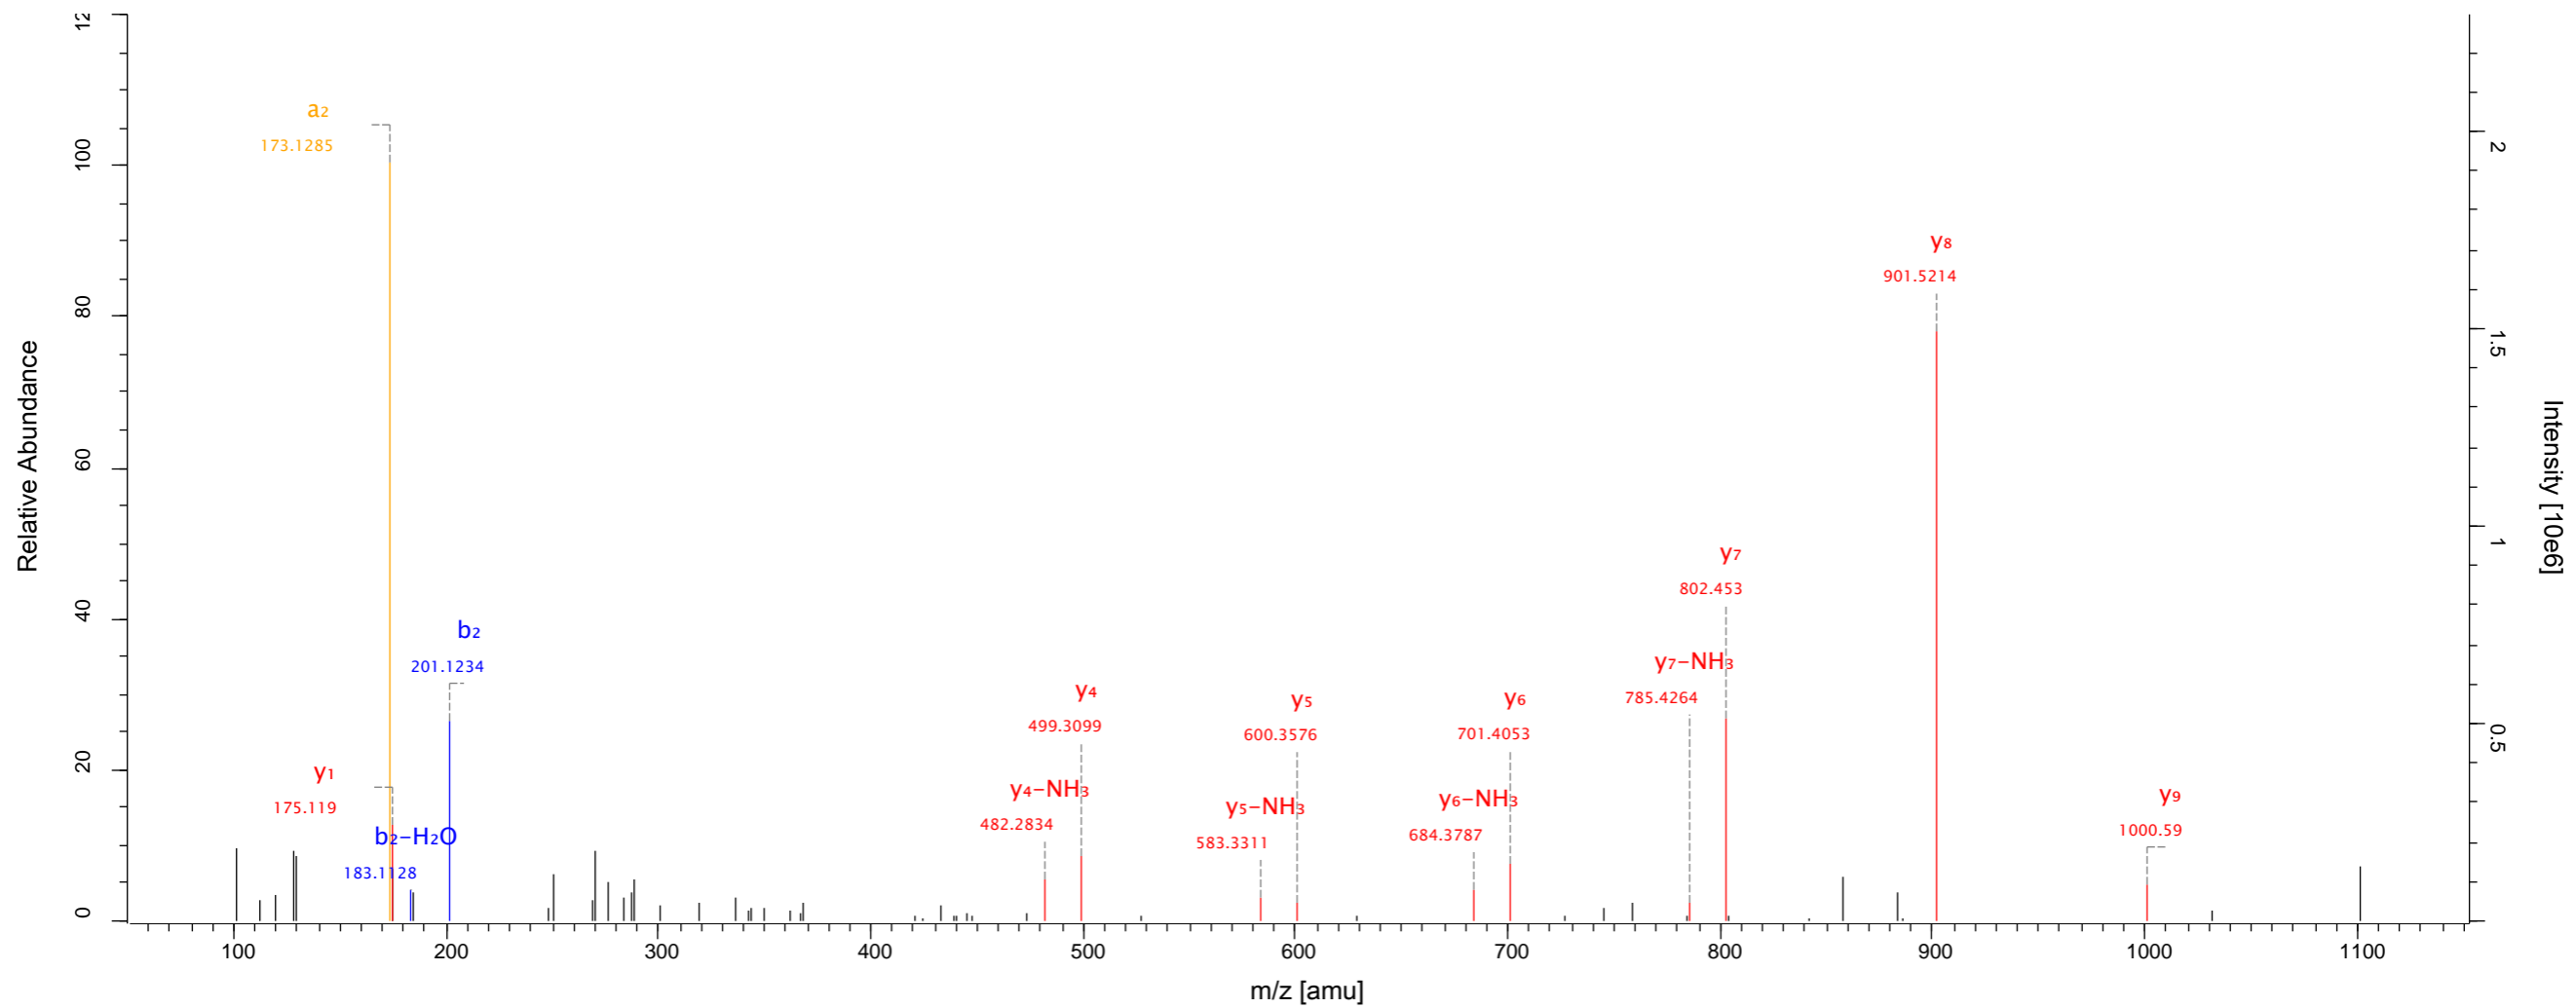

Raw file: 20111212\_EXQ5\_AnMi\_QC\_HCMVp1\_18  
Scan number: 7919  
Protein: ORFL301C - NC\_006273.2[185358,185666]- <unknown description>  
Peptide score: 127.46  
Method: FTMS; HCD

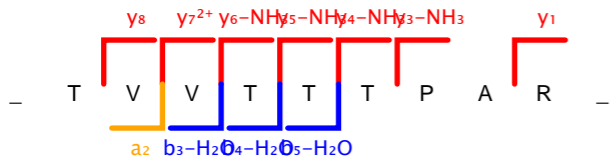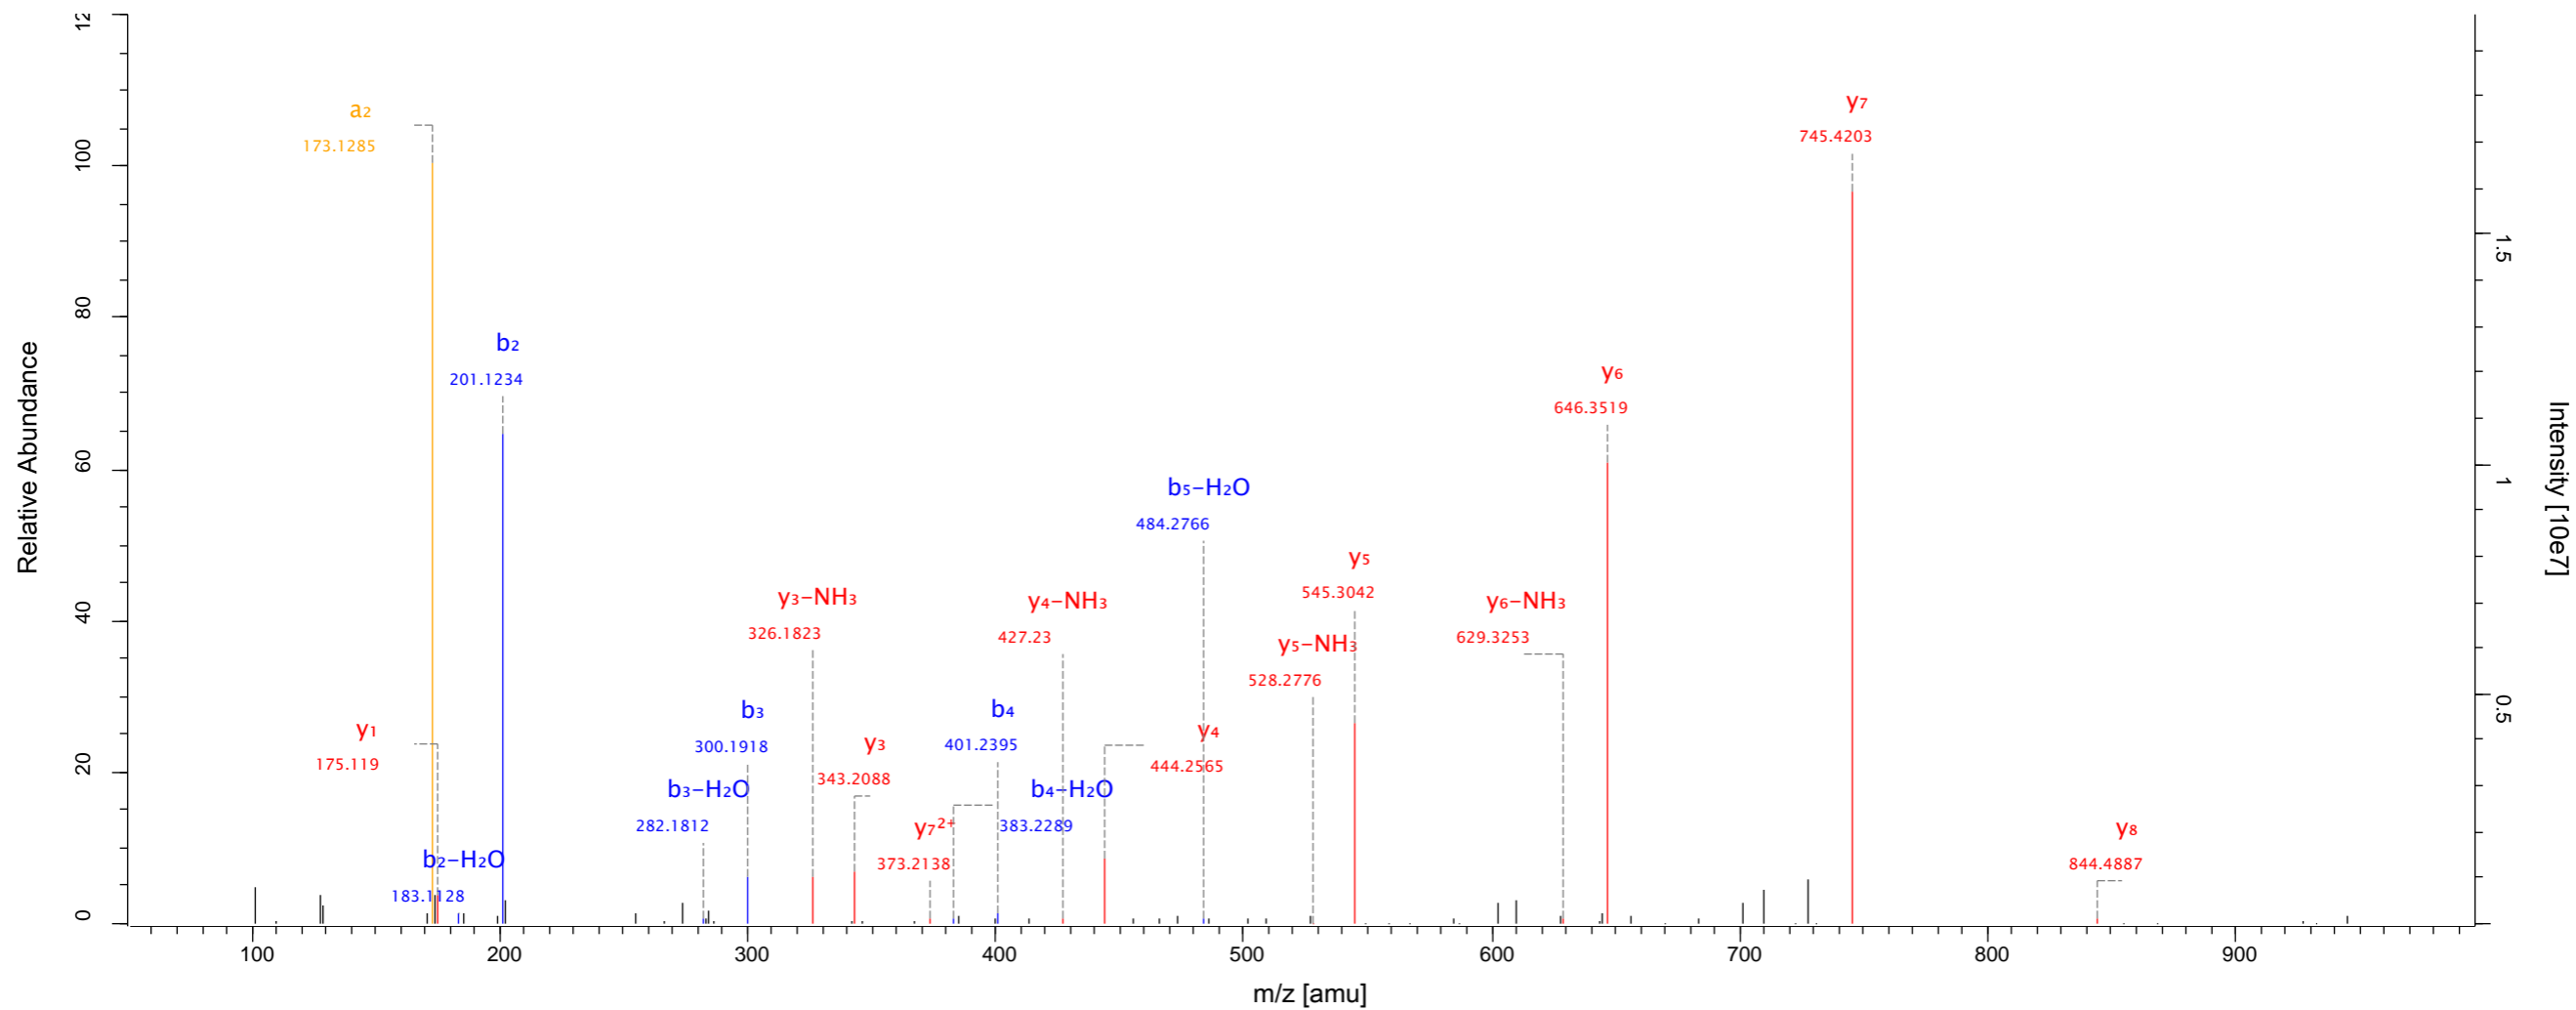

Raw file: 20111212\_EXQ5\_AnMi\_QC\_HCMVp1\_18  
Scan number: 8693  
Protein: ORFL271C.iORF1 - NC\_006273.2[176607,176858]- <unknown description>  
Peptide score: 124.92  
Method: FTMS; HCD

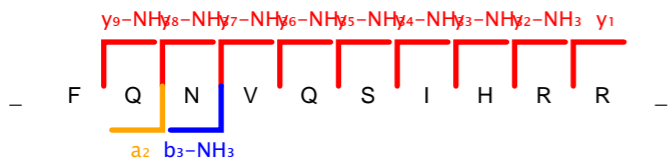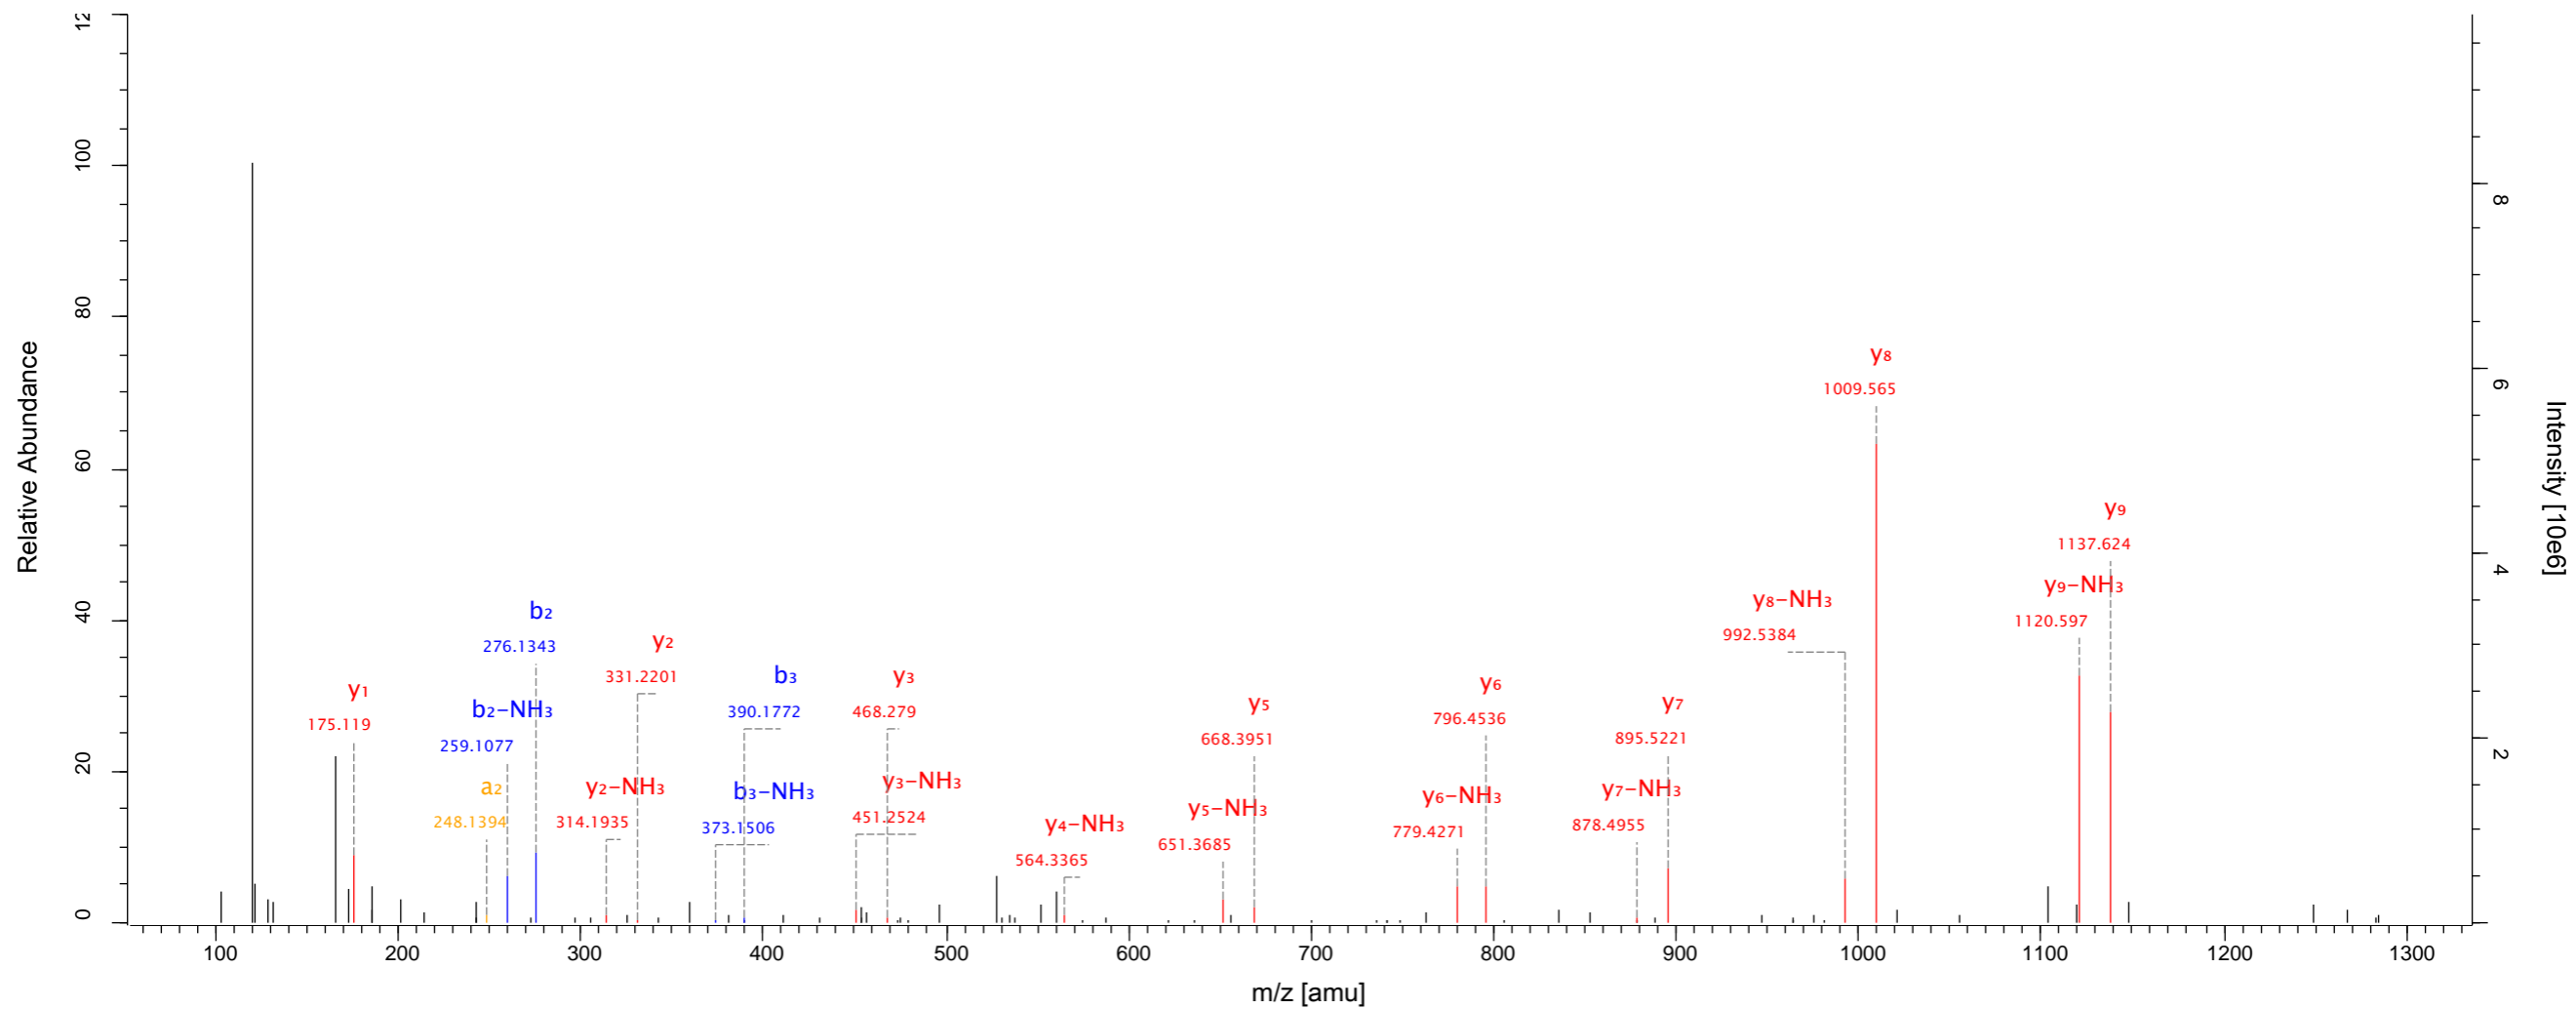

Raw file: 20111212\_EXQ5\_AnMi\_QC\_HCMVp1\_19  
Scan number: 10470  
Protein: ORFL224C.iORF1 - NC\_006273.2[134354,134734]- <unknown description>  
Peptide score: 31.61  
Method: FTMS; HCD

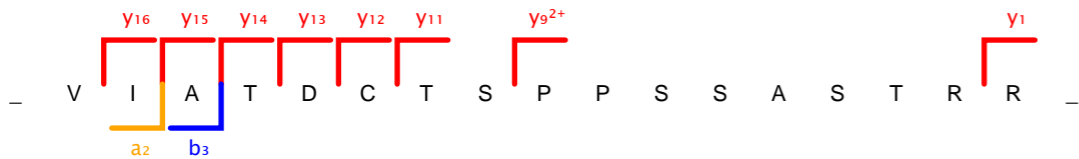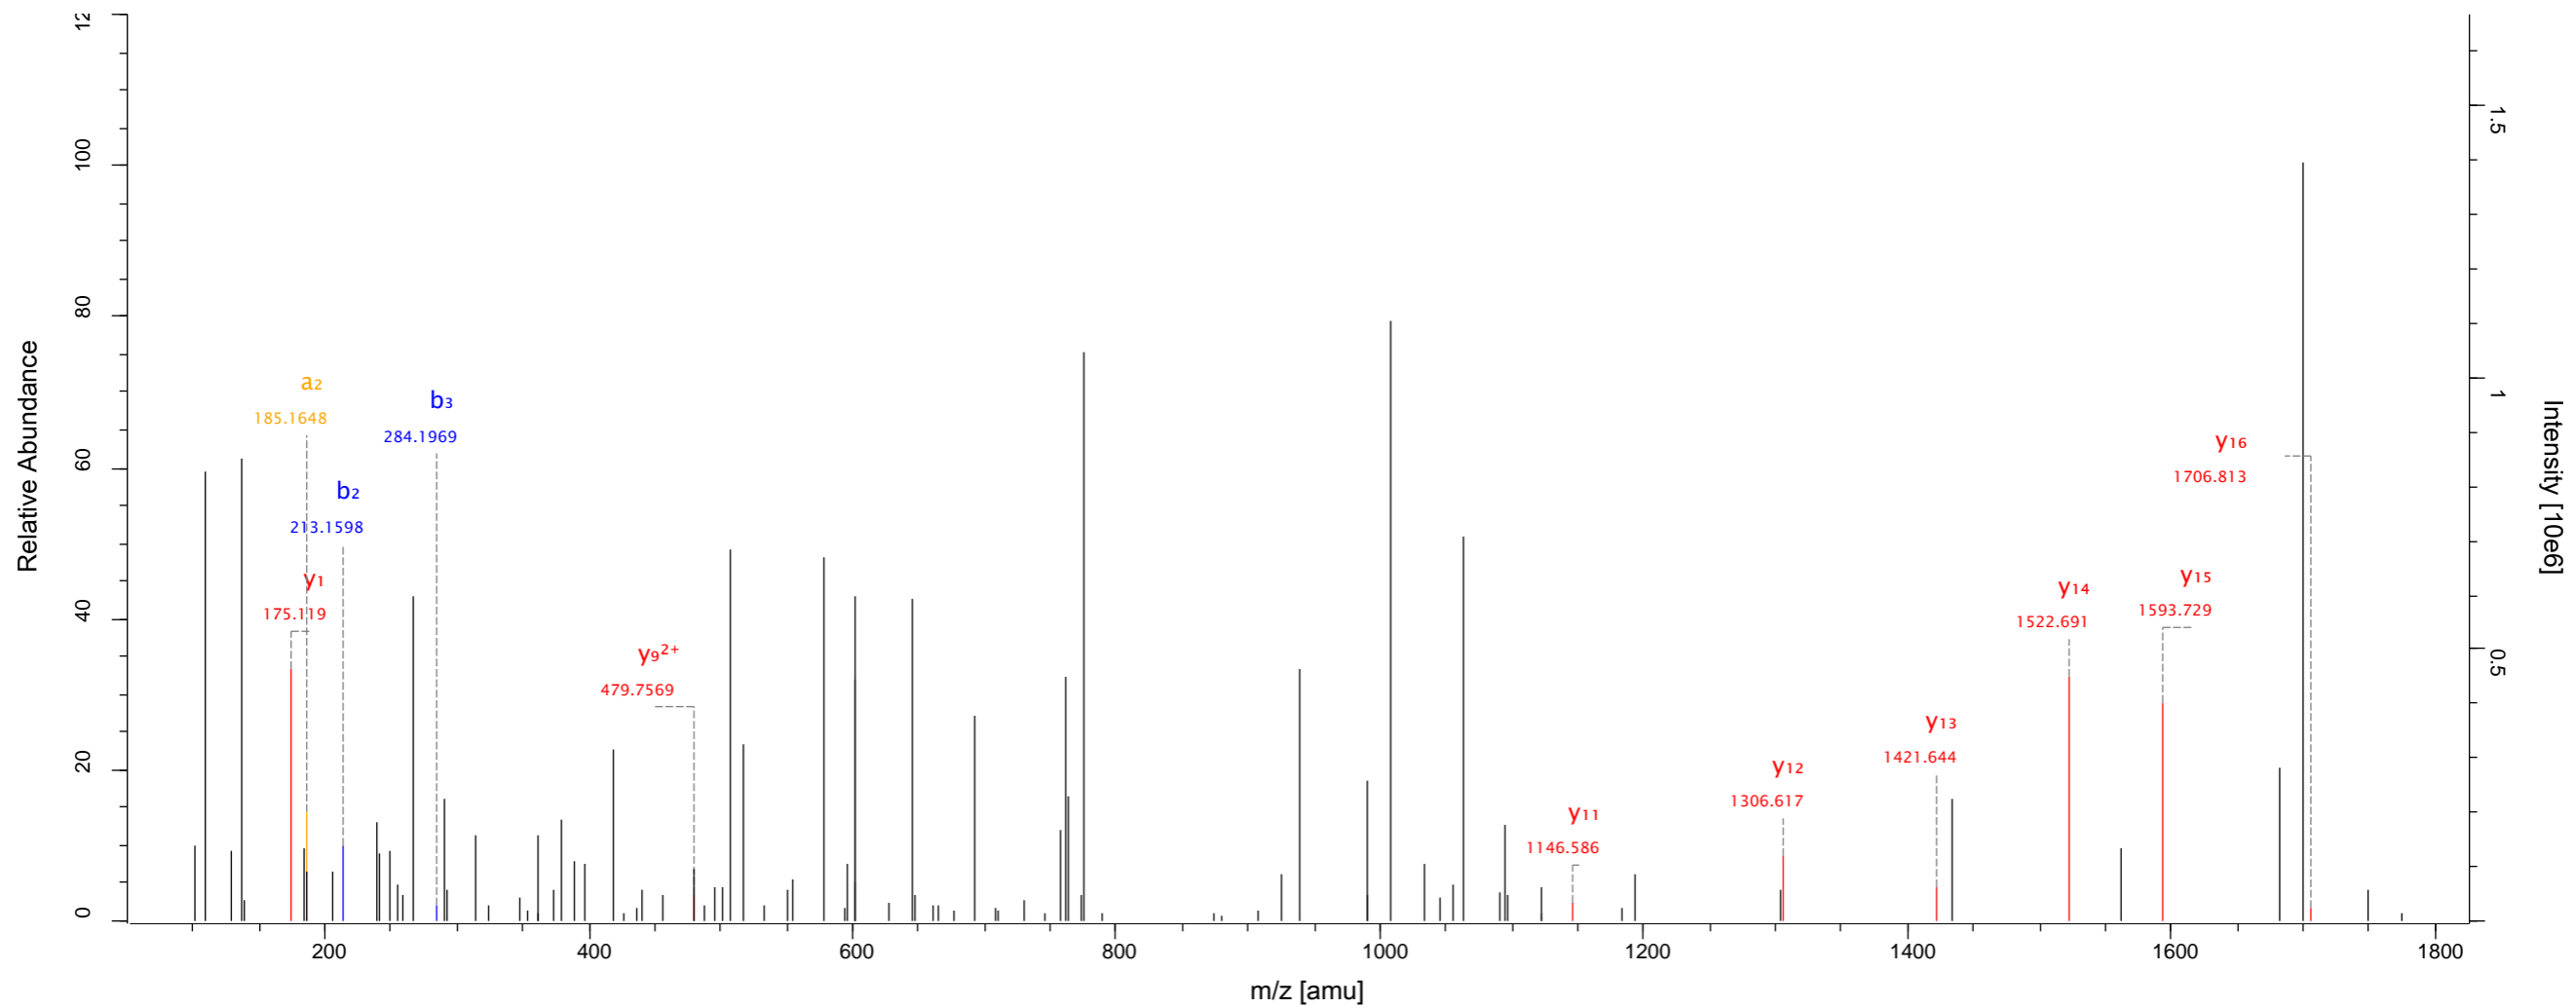

Raw file: 20111212\_EXQ5\_AnMi\_QC\_HCMVp1\_19  
Scan number: 11193  
Protein: ORFL224C.iORF1 - NC\_006273.2[134354,134734]- <unknown description>  
Peptide score: 102.65  
Method: FTMS; HCD

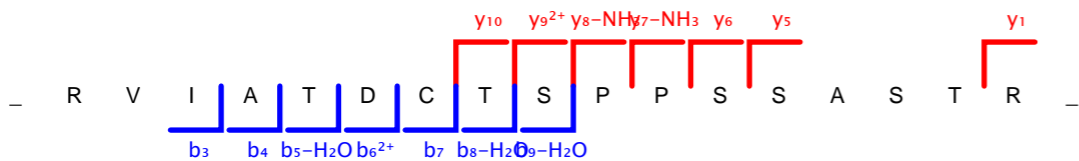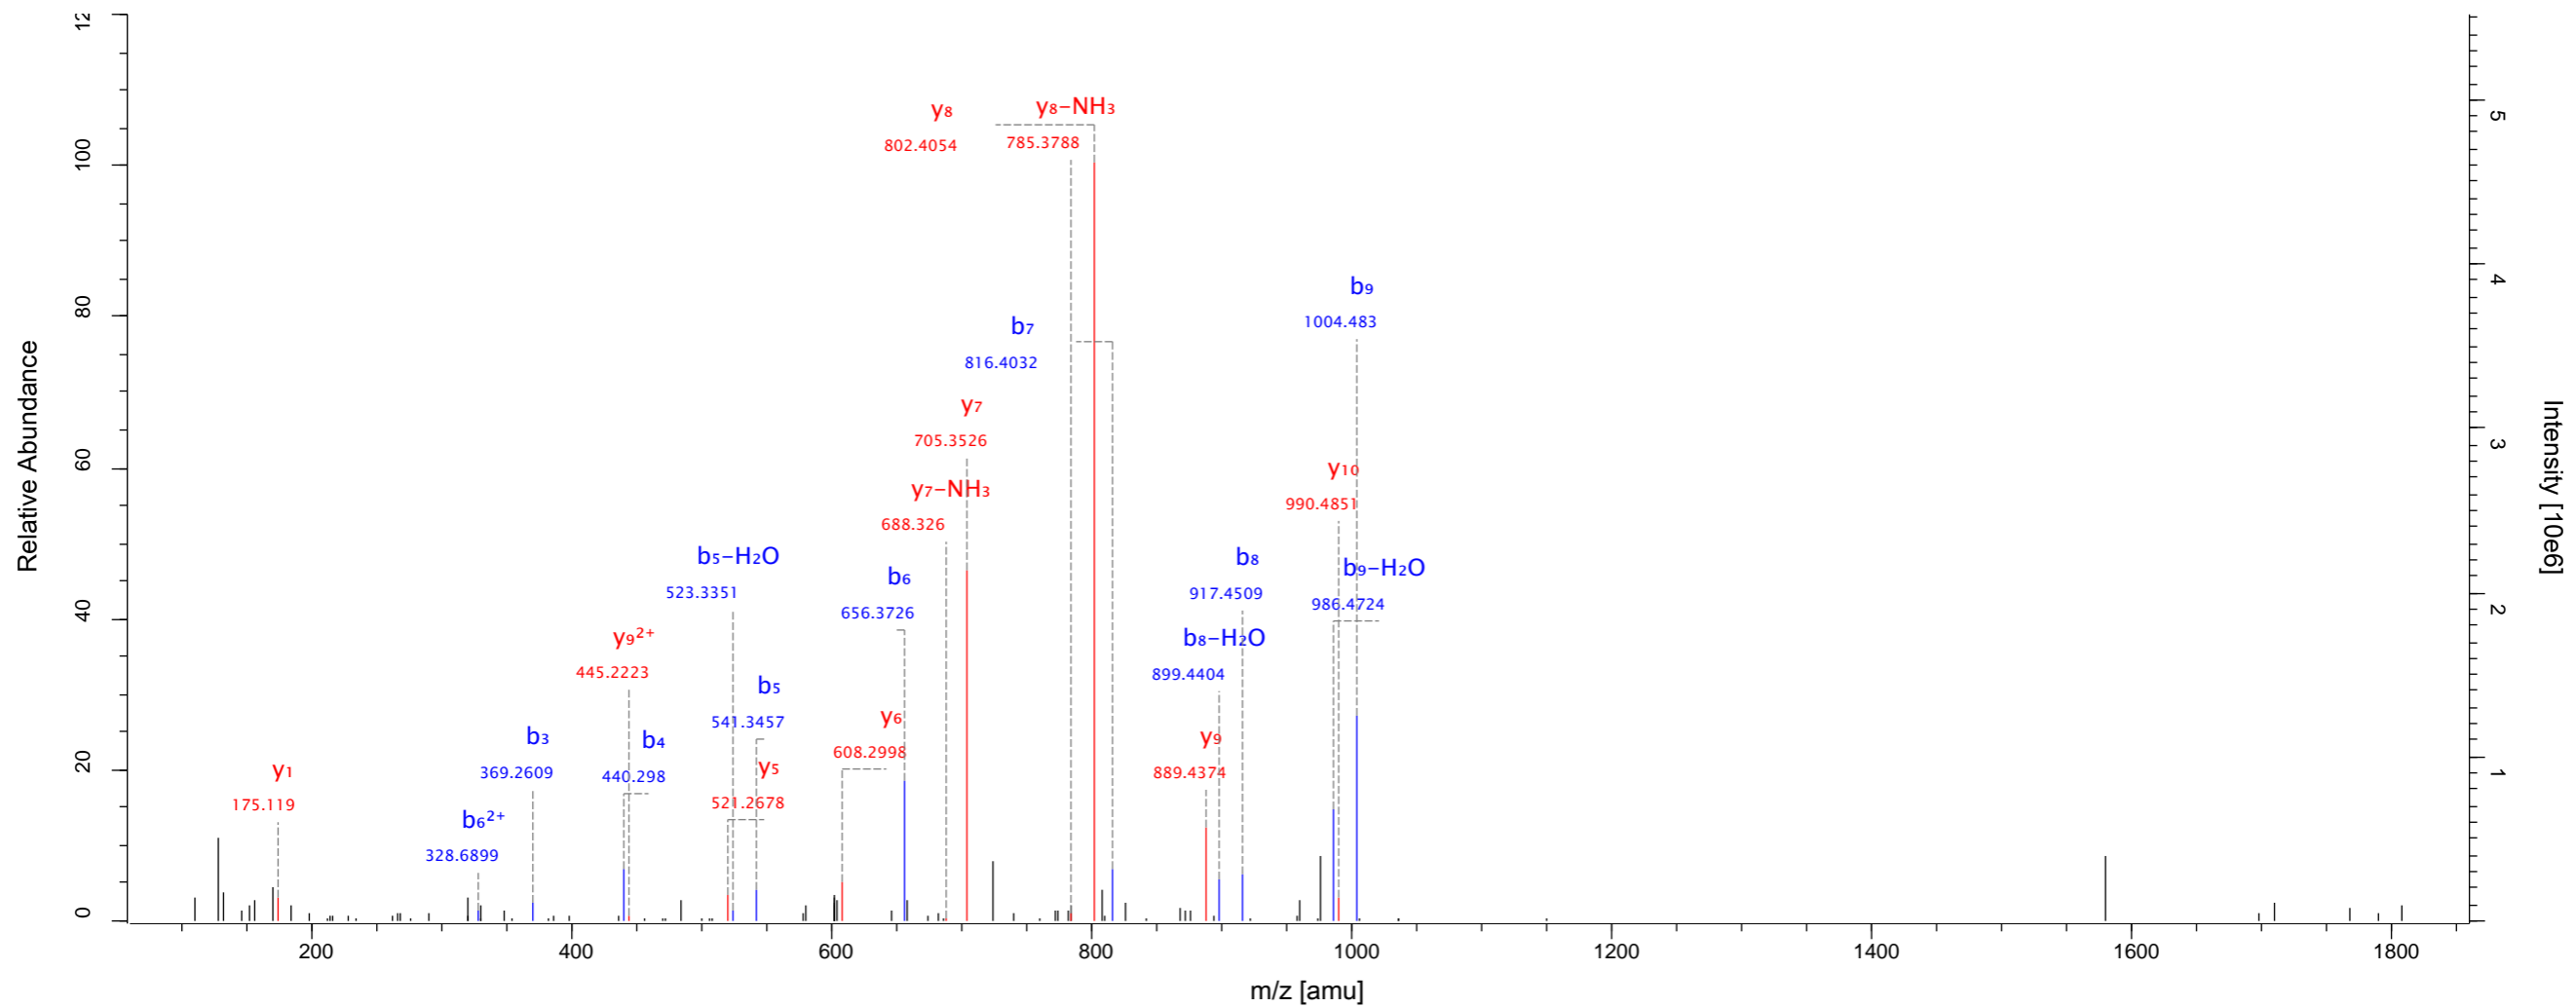

Raw file: 20111212\_EXQ5\_AnMi\_QC\_HCMVp11\_19  
Scan number: 11897  
Protein: ORFL237C - NC\_006273.2[149340,149699]- <unknown description>  
Peptide score: 144.5  
Method: FTMS; HCD

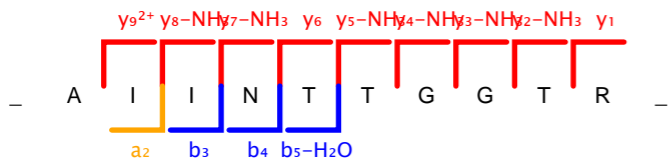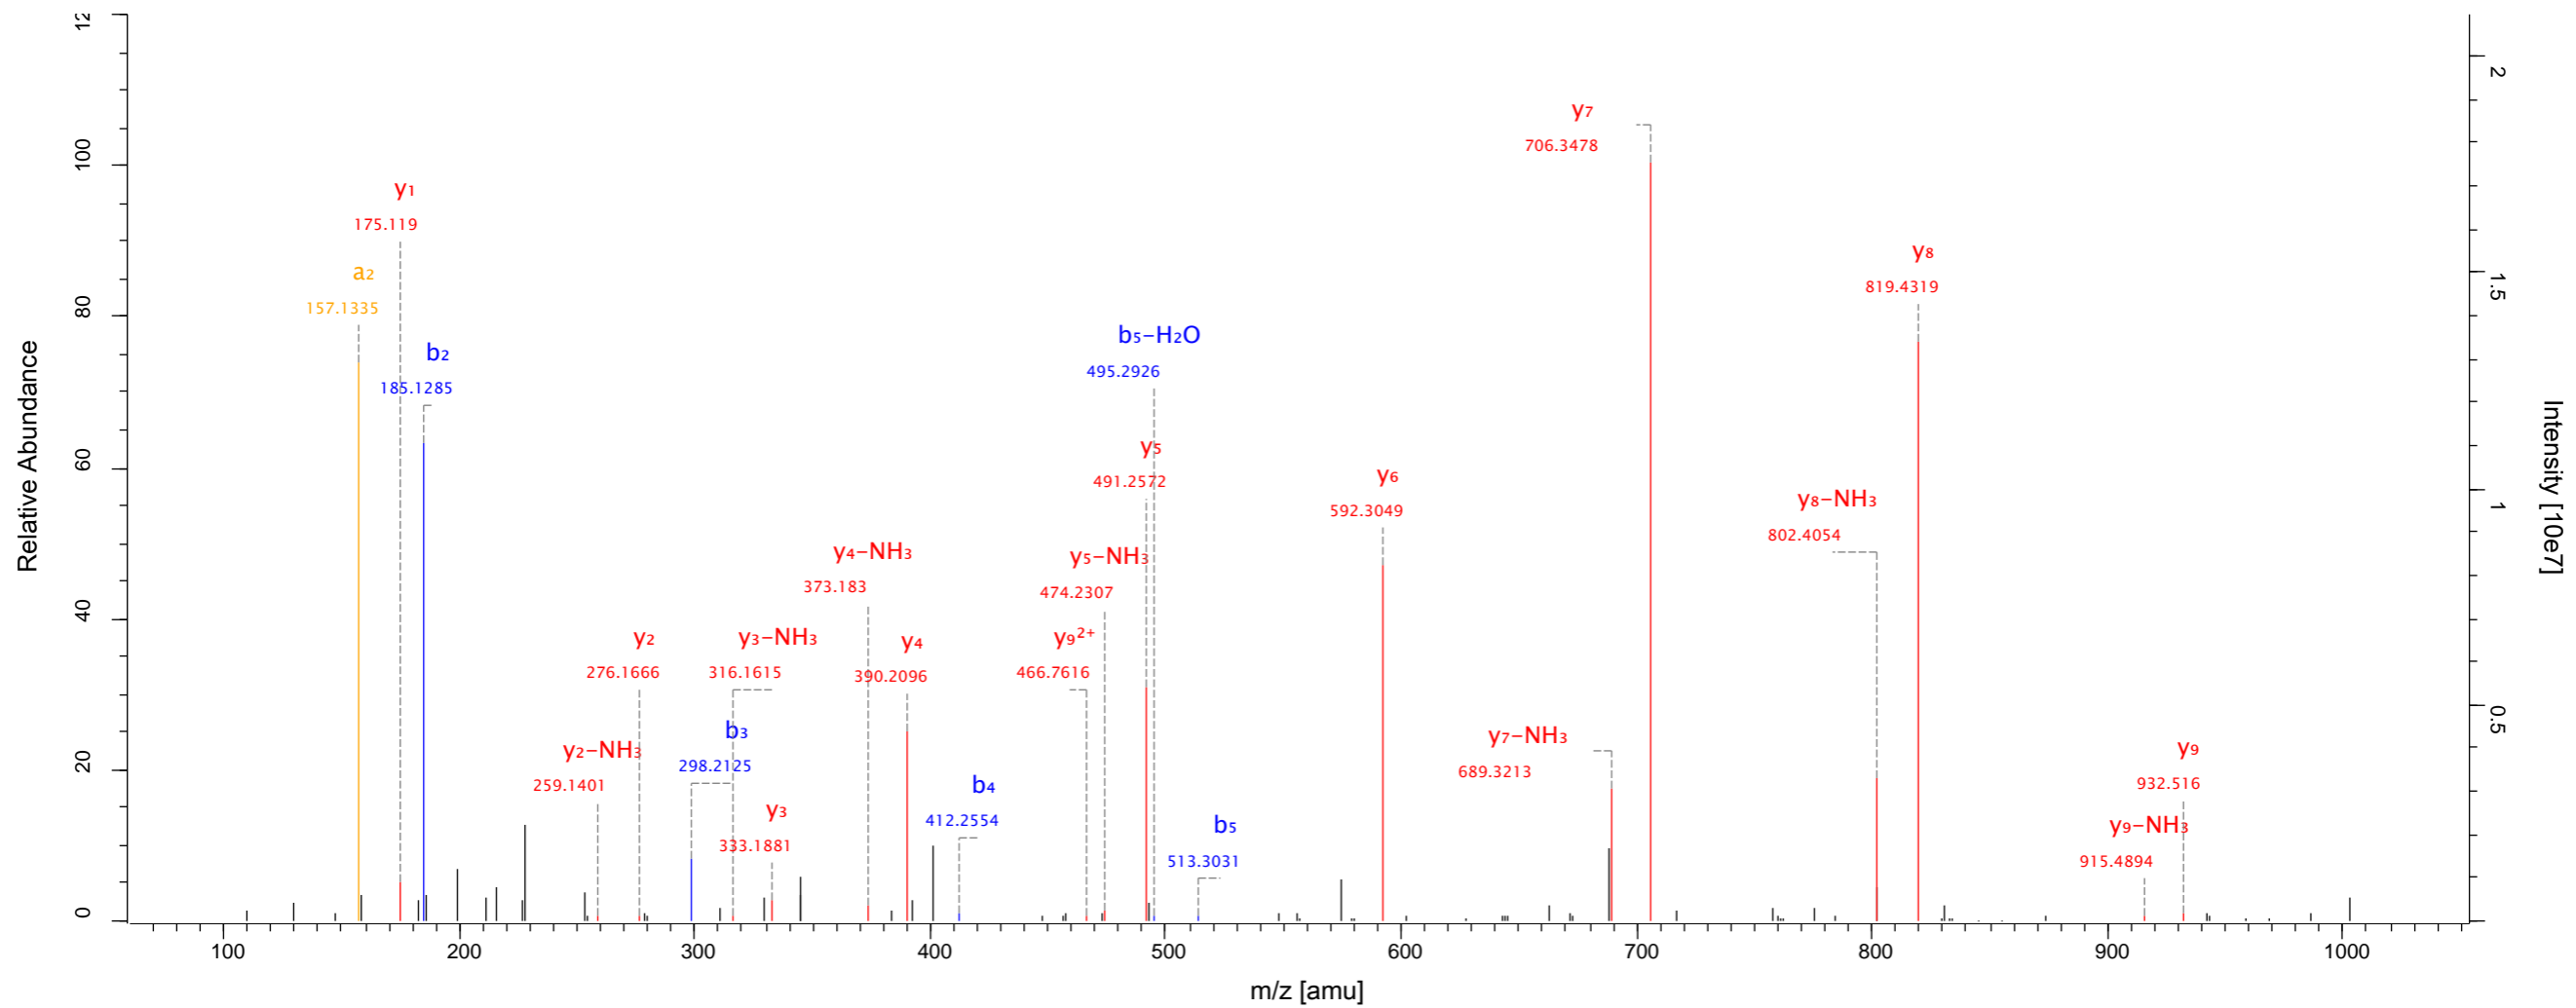

Raw file: 20111212\_EXQ5\_AnMi\_QC\_HCMVp1\_19

Scan number: 13446

Protein: ORFL159W + NC\_006273.2[101475,109052]+ <unknown description>; ORFL159W.iORF1 + NC\_006273.2[101526,109052]+ <unknown description>; ORFL178W + NC\_006273.2[108142,109052]+ <unknown description>; ORFL163W + NC\_006273.2[101475,109052]+ <unknown description>;

Peptide score: 125.61

Method: FTMS; HCD

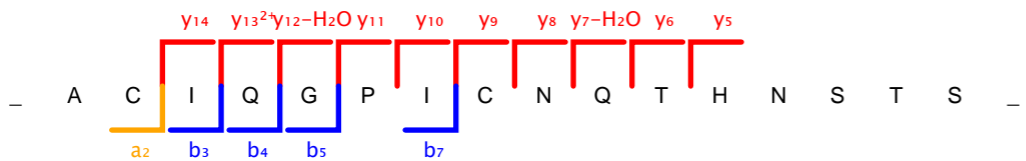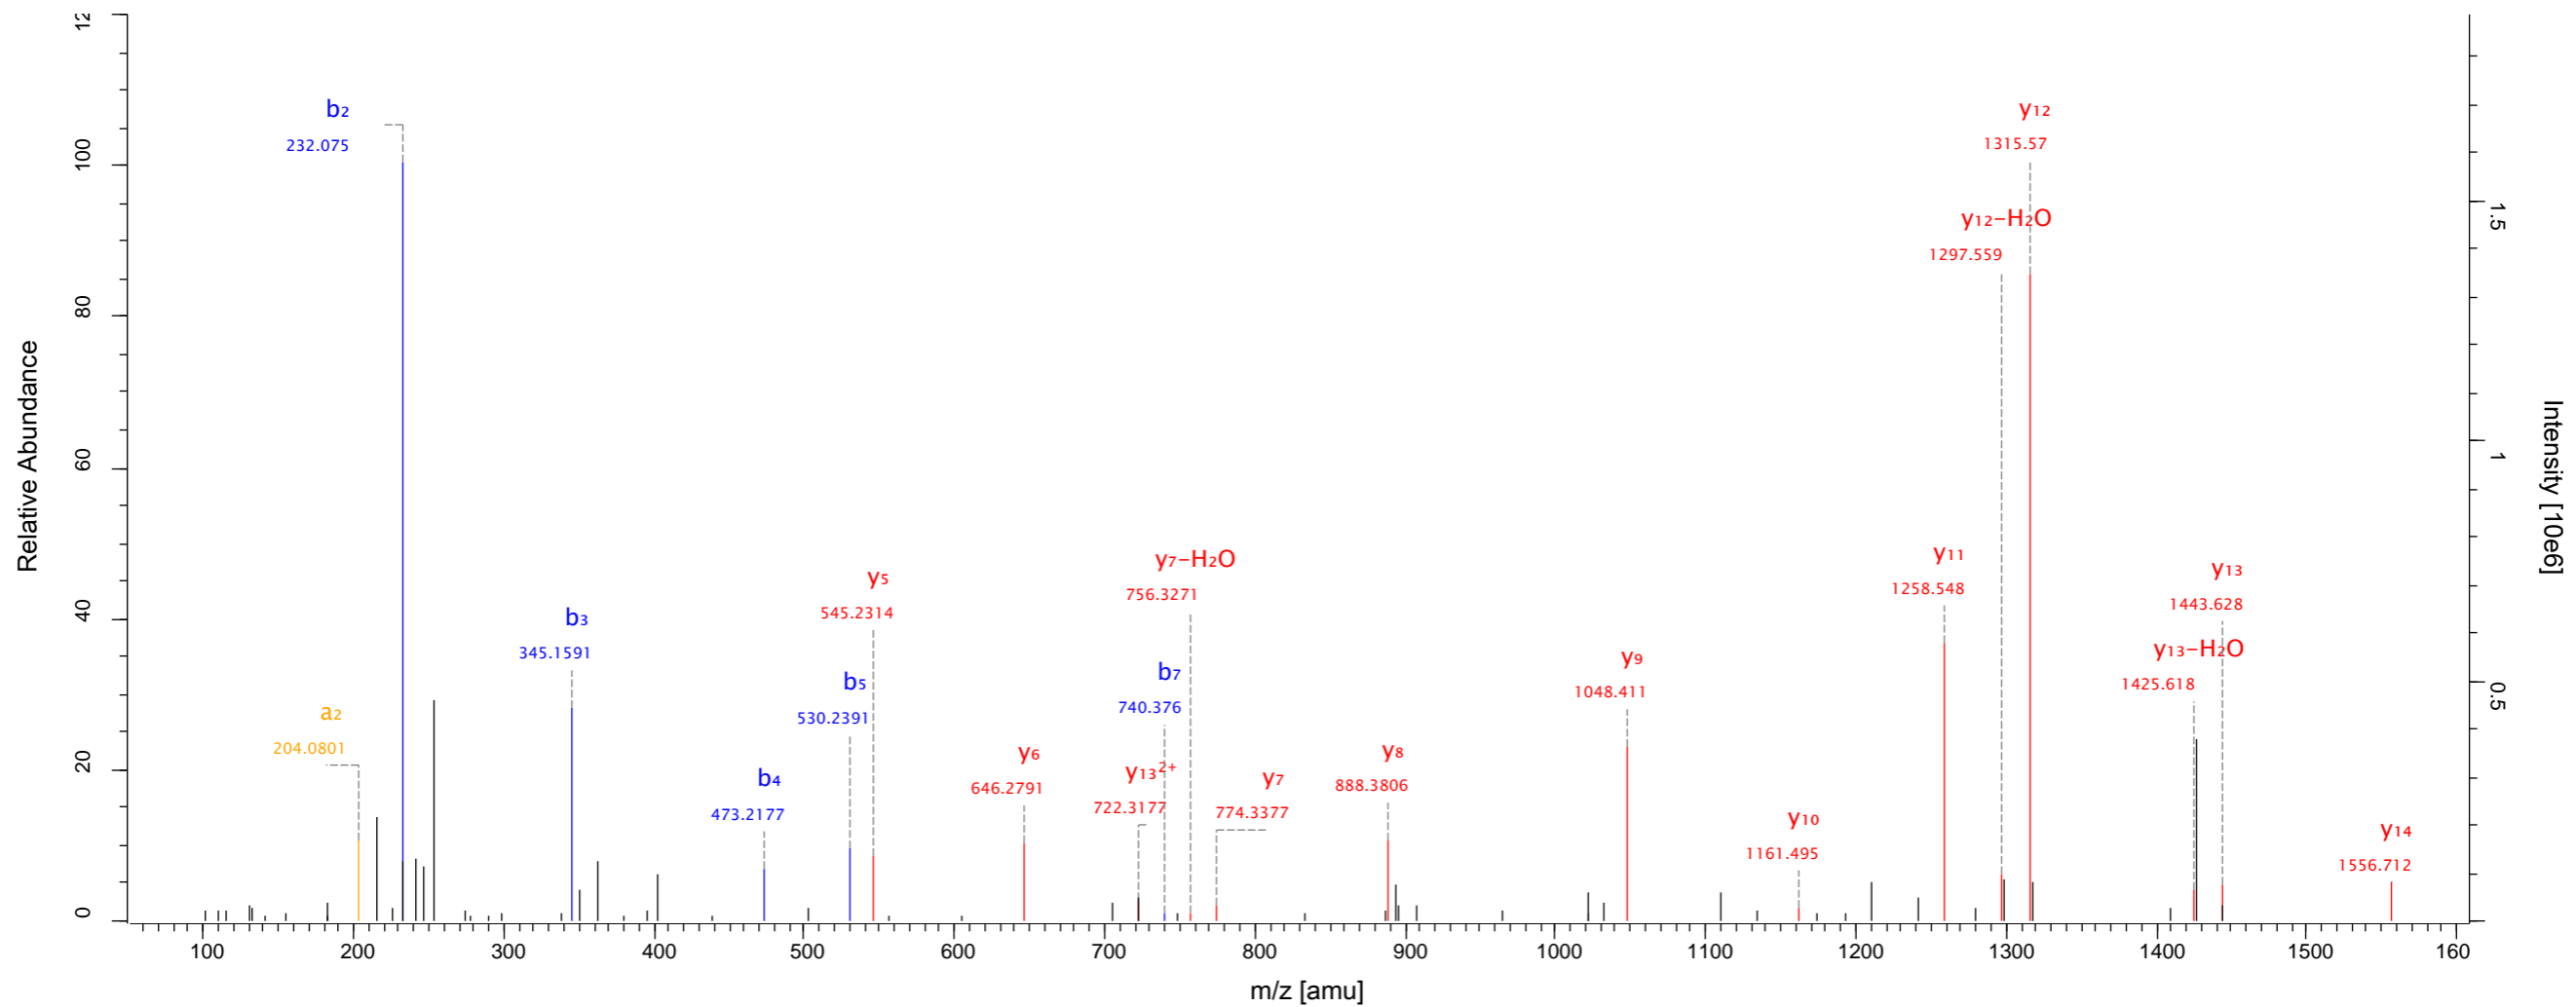



Raw file: 20111212\_EXQ5\_AnMi\_QC\_HCMVp1\_19  
Scan number: 13486  
Protein: ORFL190C - NC\_006273.2[111965,112384]- <unknown description>  
Peptide score: 107.79  
Method: FTMS; HCD

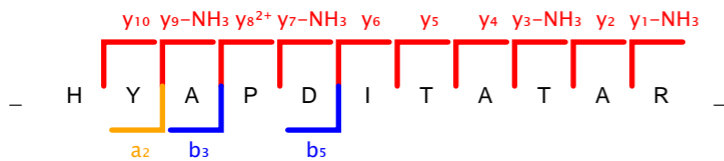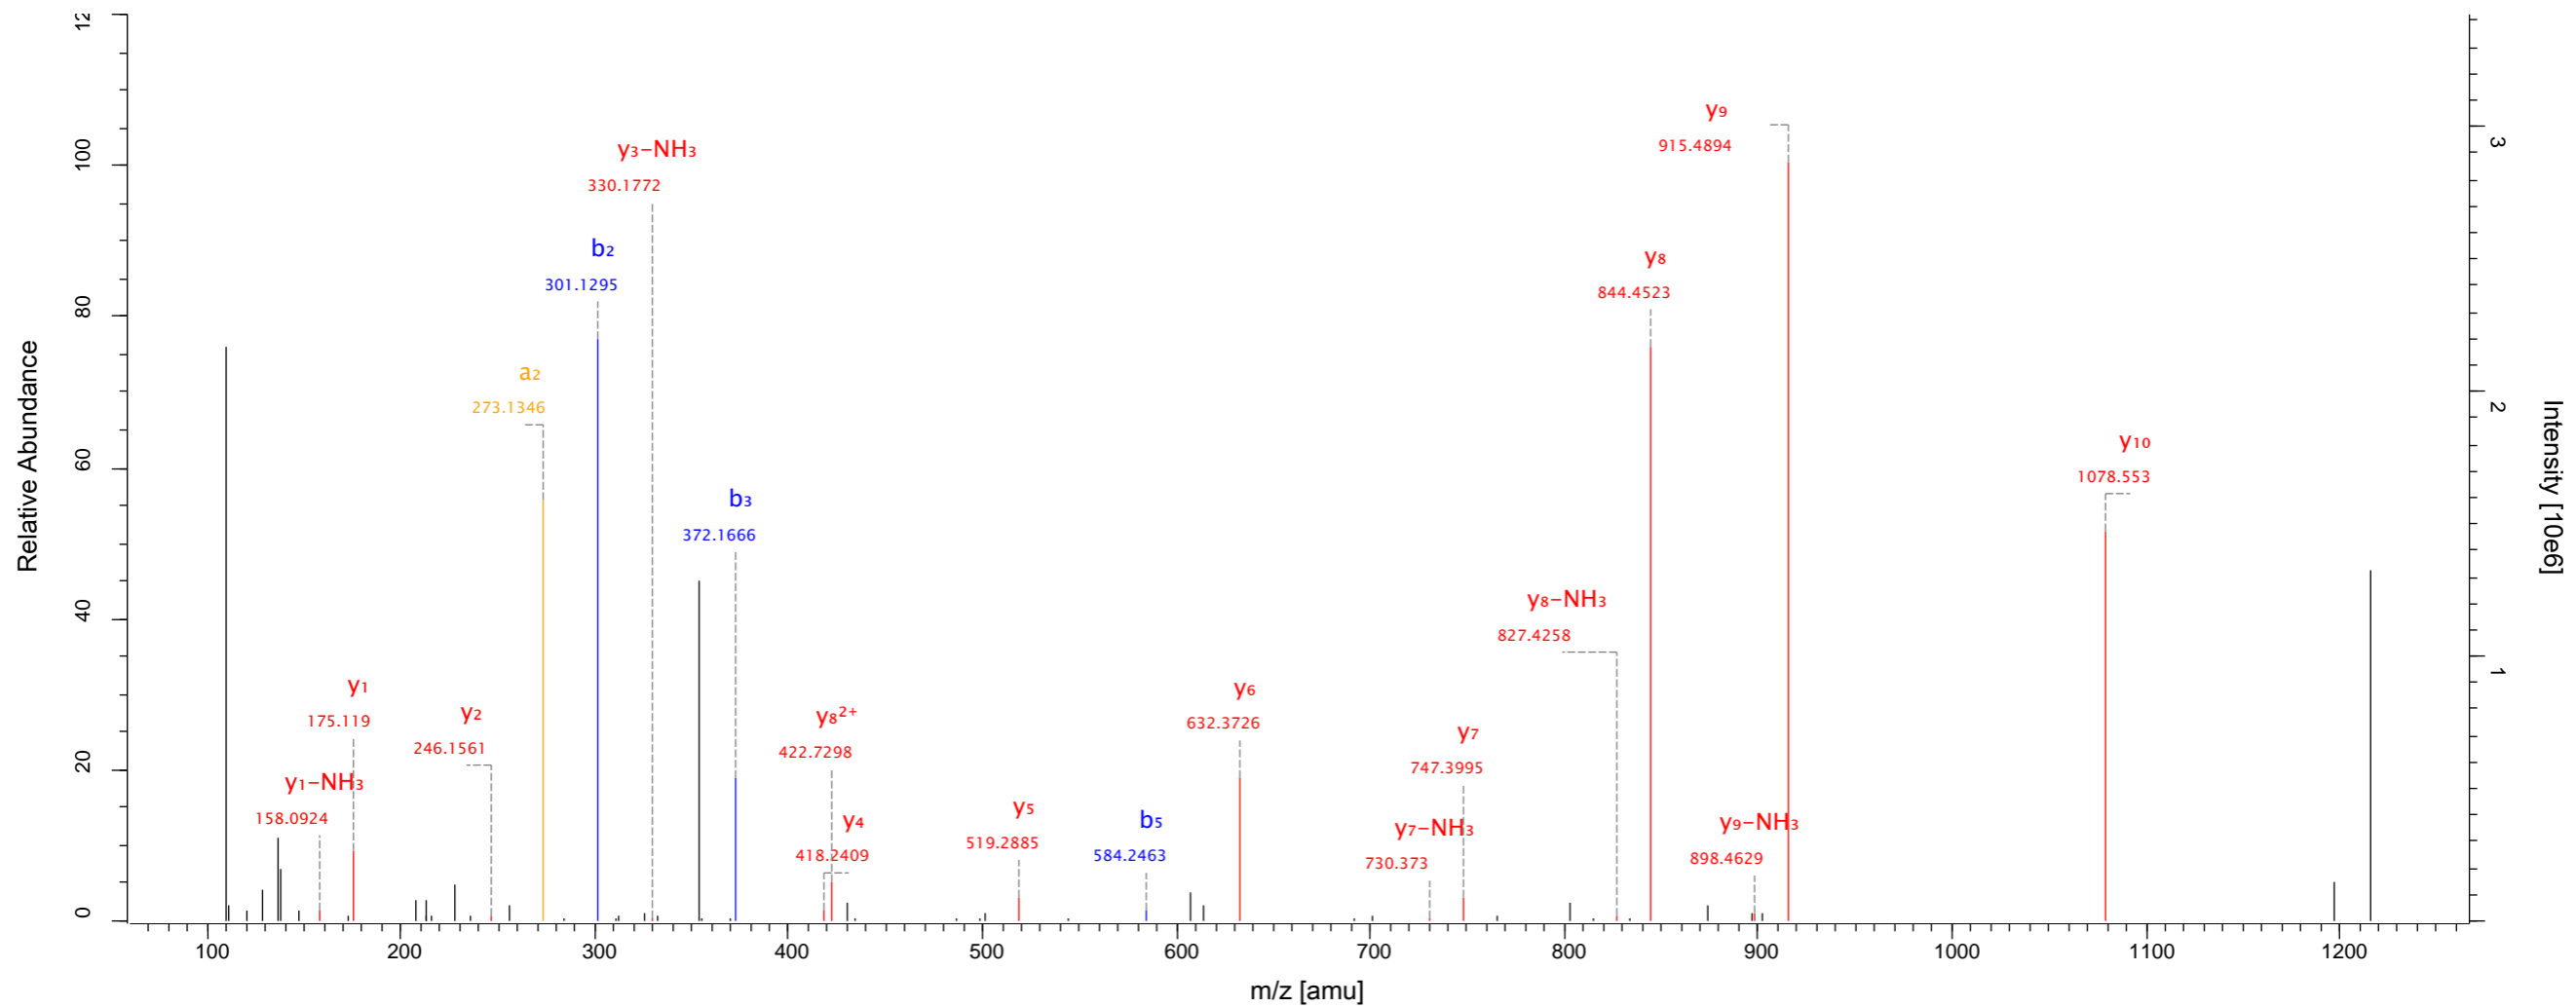

Raw file: 20111212\_EXQ5\_AnMi\_QC\_HCMVp1\_19  
Scan number: 18343  
Protein: ORFL86W + NC\_006273.2[38059,38538]+ <unknown description>  
Peptide score: 61.21  
Method: FTMS; HCD

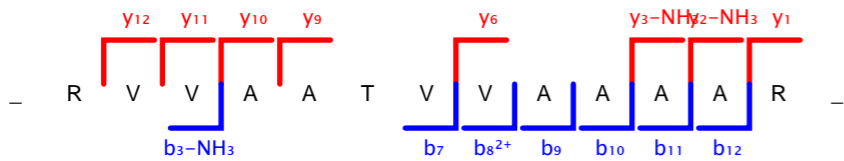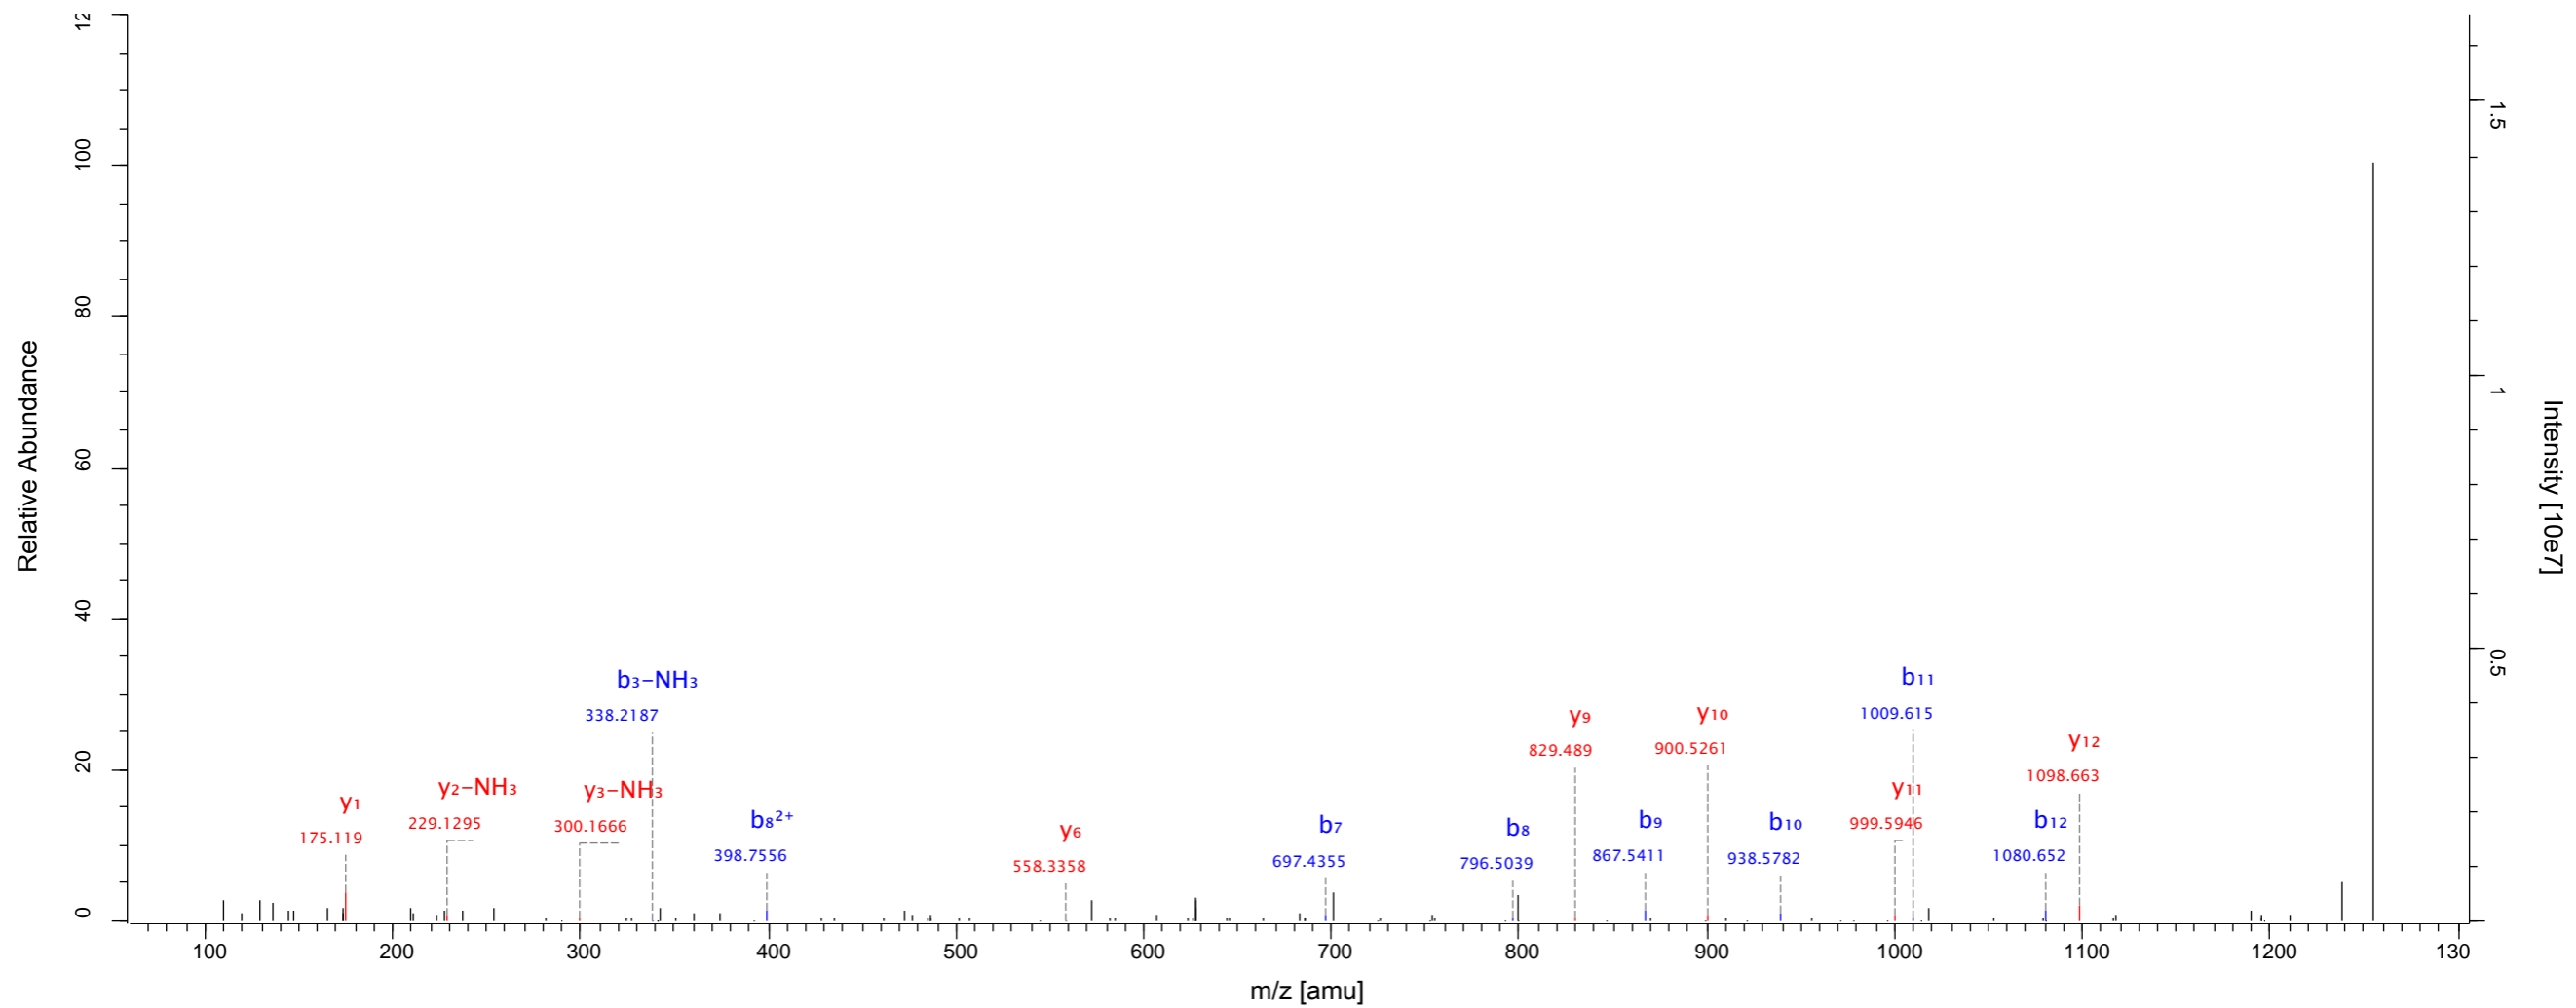

Raw file: 20111212\_EXQ5\_AnMi\_QC\_HCMVp11\_19  
Scan number: 19685  
Protein: ORFL224C.iORF1 - NC\_006273.2[134354,134734]- <unknown description>  
Peptide score: 85.35  
Method: FTMS; HCD

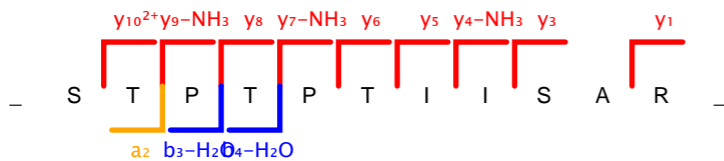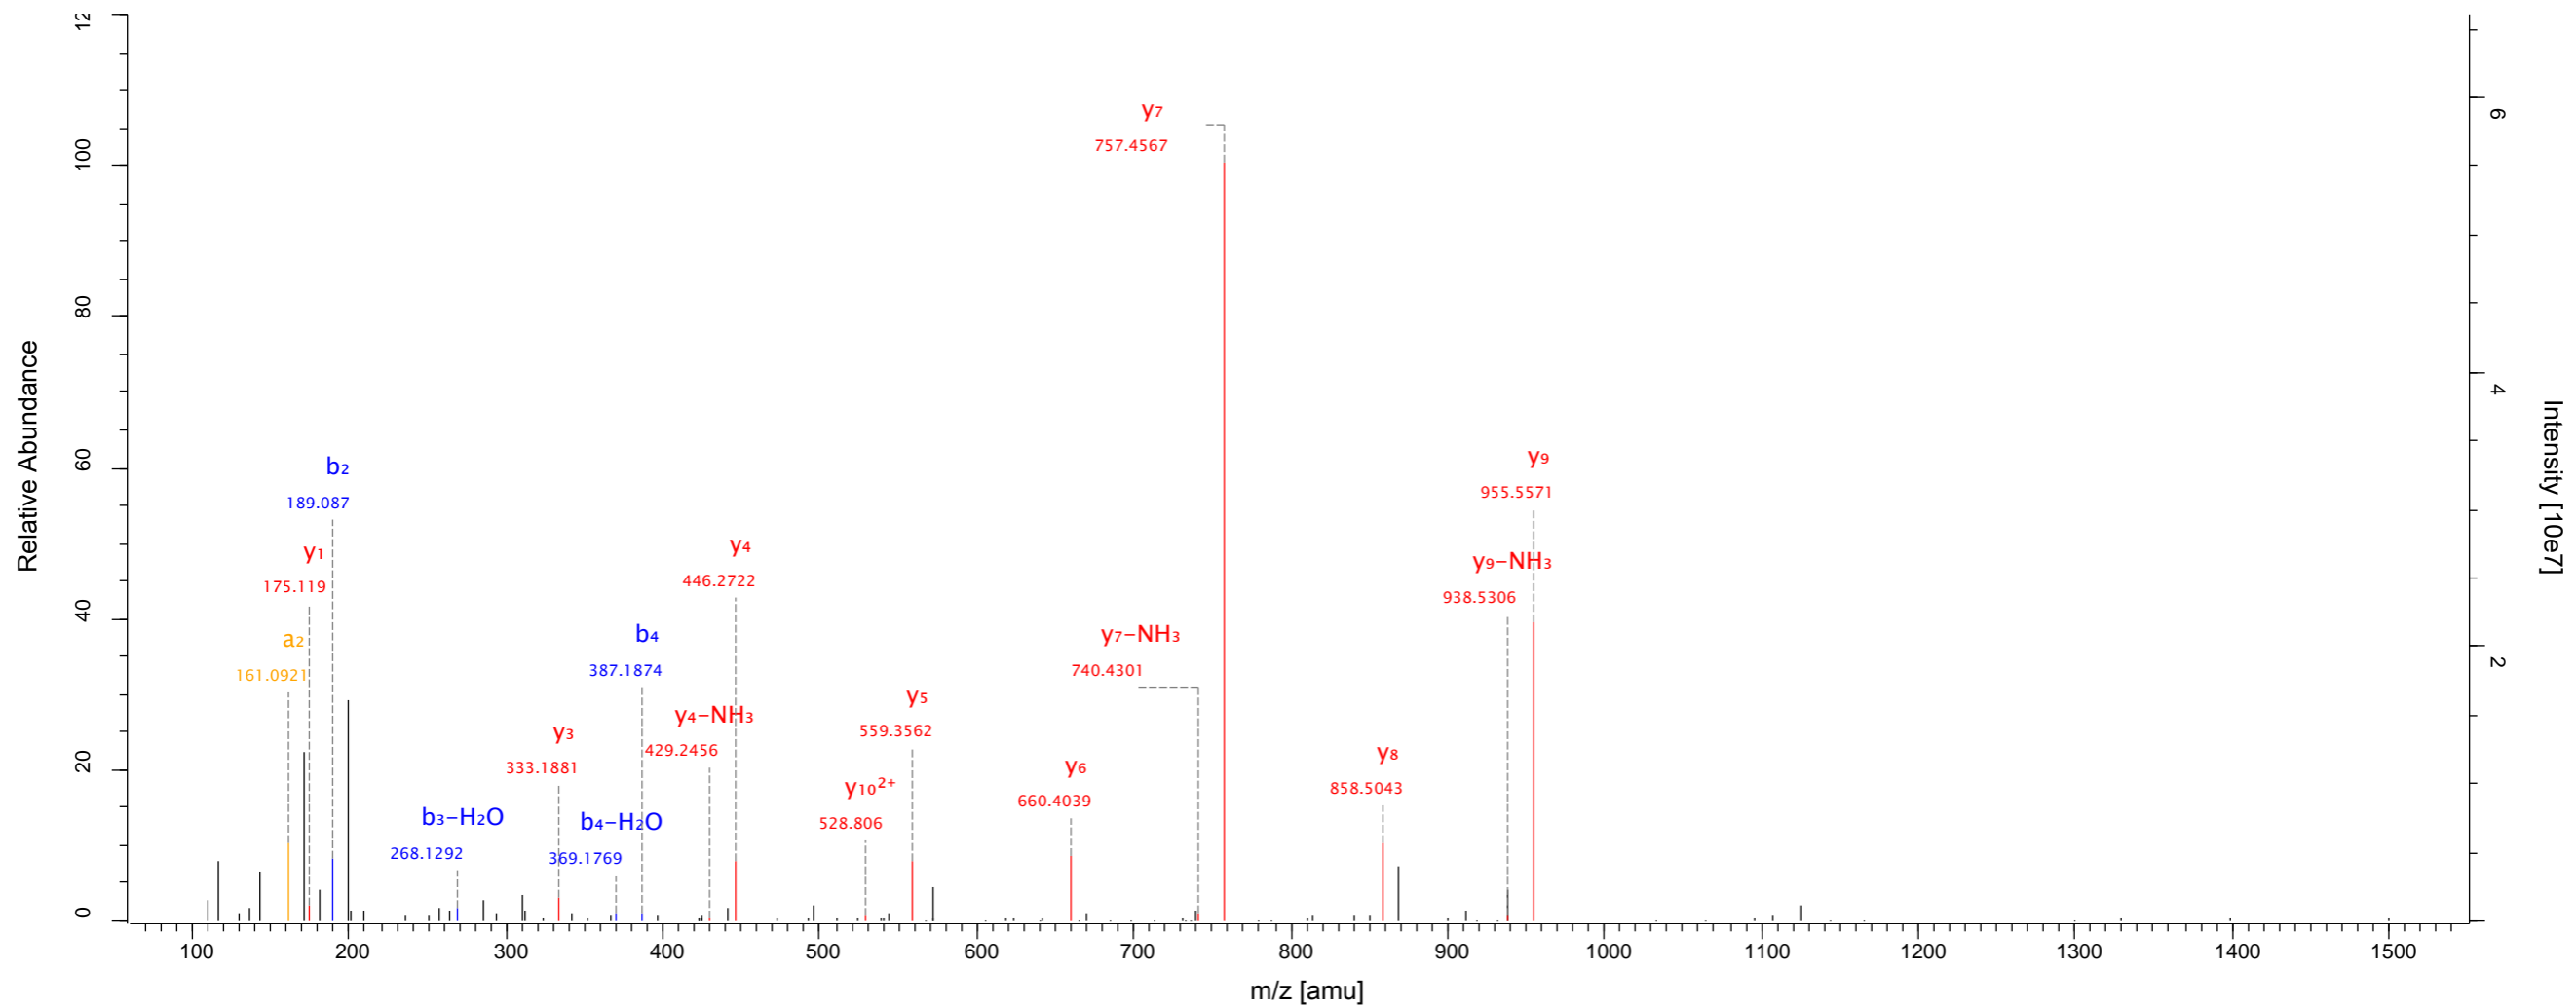

Raw file: 20111212\_EXQ5\_AnMi\_QC\_HCMVp11\_19  
Scan number: 20000  
Protein: ORFL237C - NC\_006273.2[149340,149699]- <unknown description>  
Peptide score: 125.61  
Method: FTMS; HCD

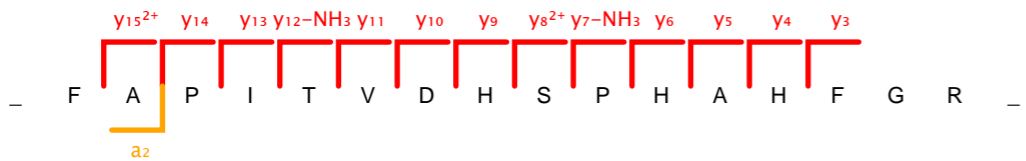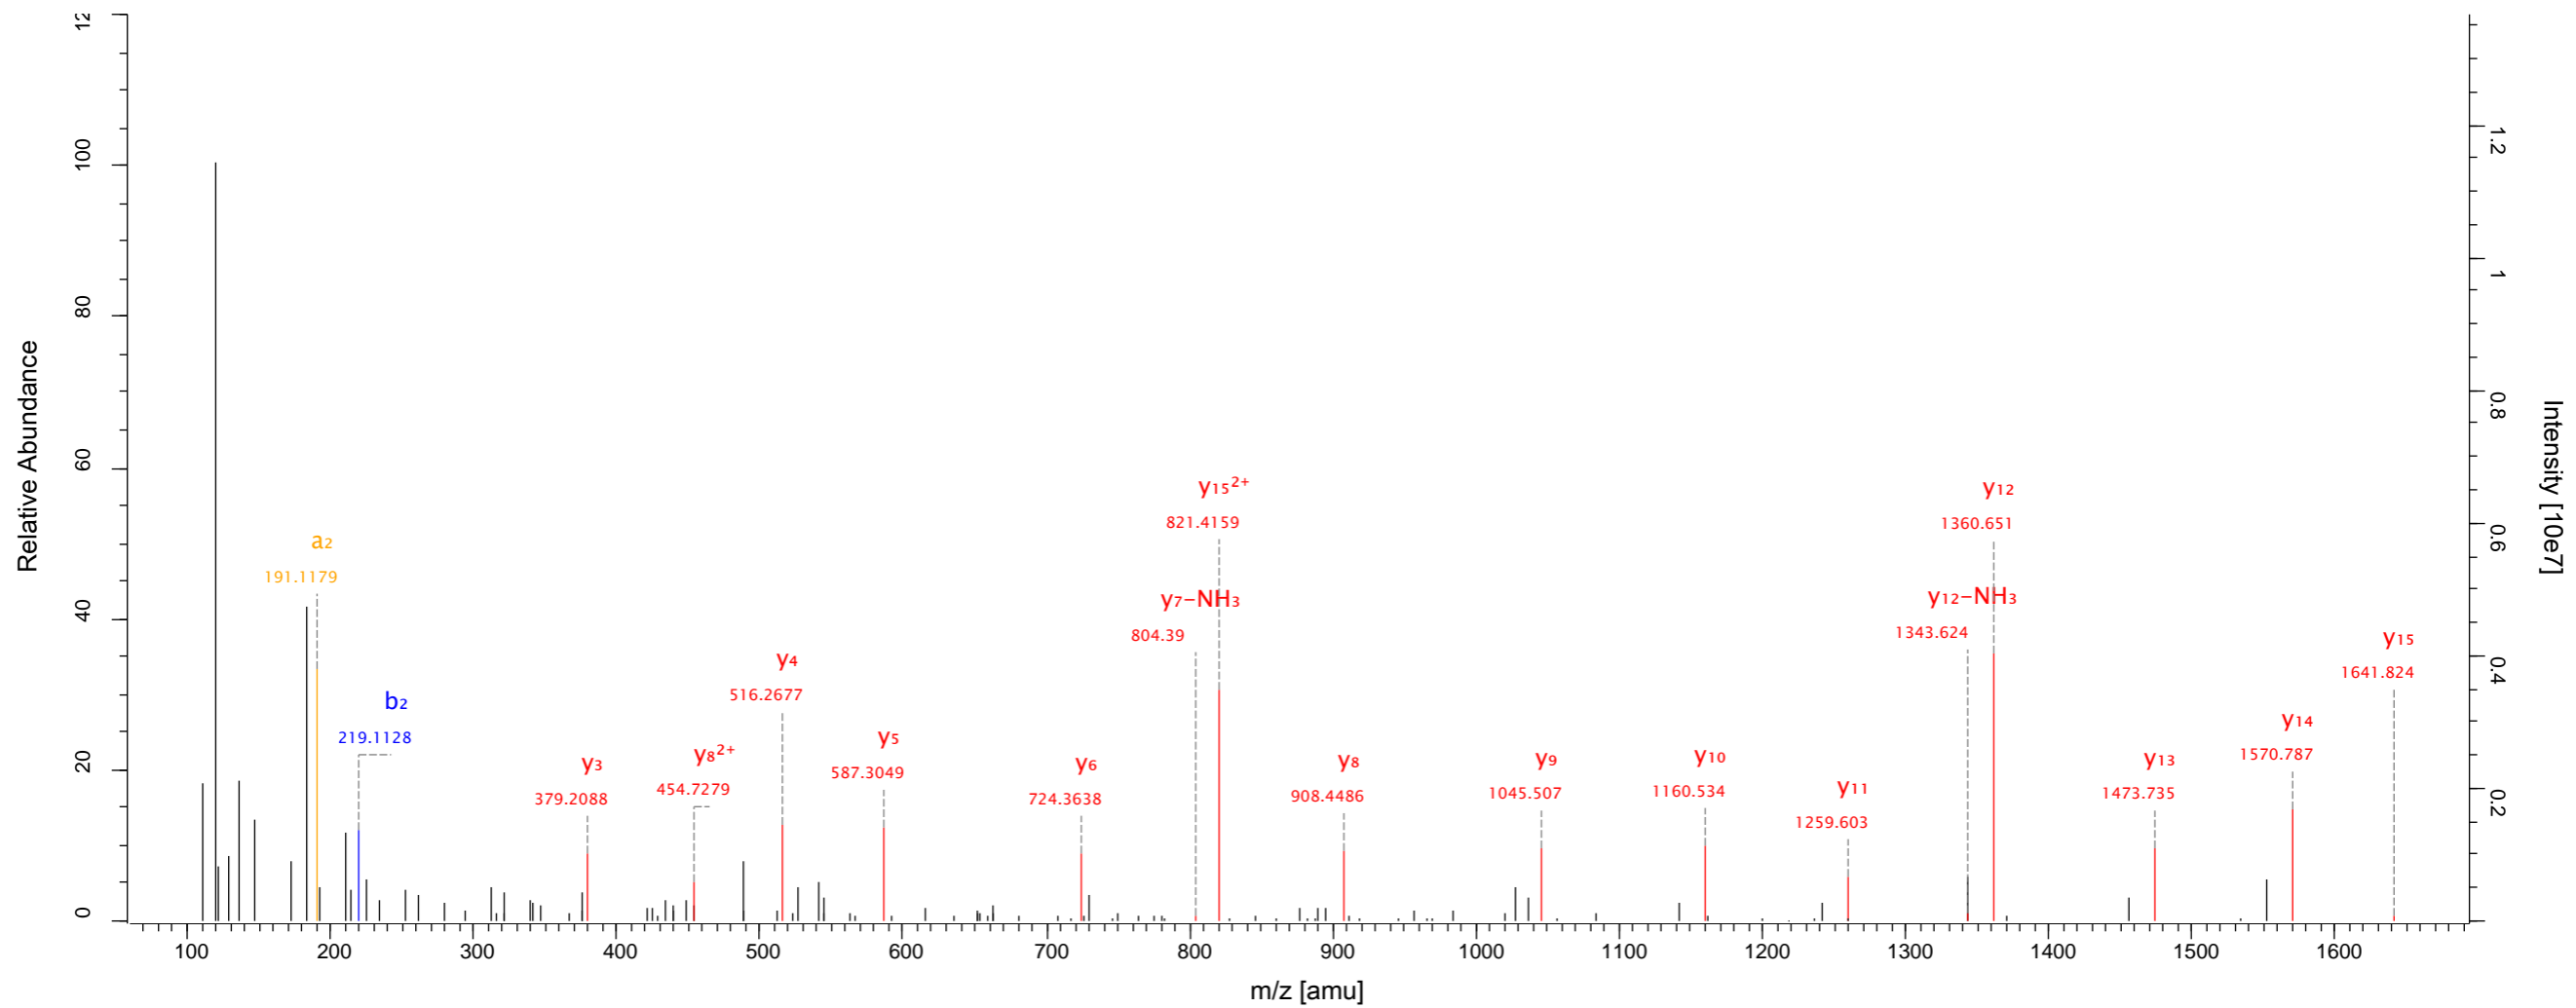

Raw file: 20111212\_EXQ5\_AnMi\_QC\_HCMVp11\_19  
Scan number: 22030  
Protein: ORFL118C - NC\_006273.2[61896,62396]- <unknown description>  
Peptide score: 91.58  
Method: FTMS; HCD

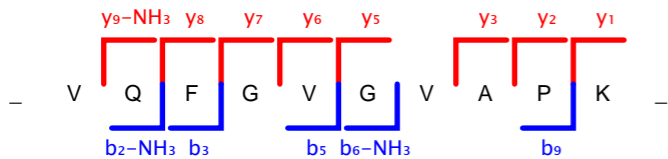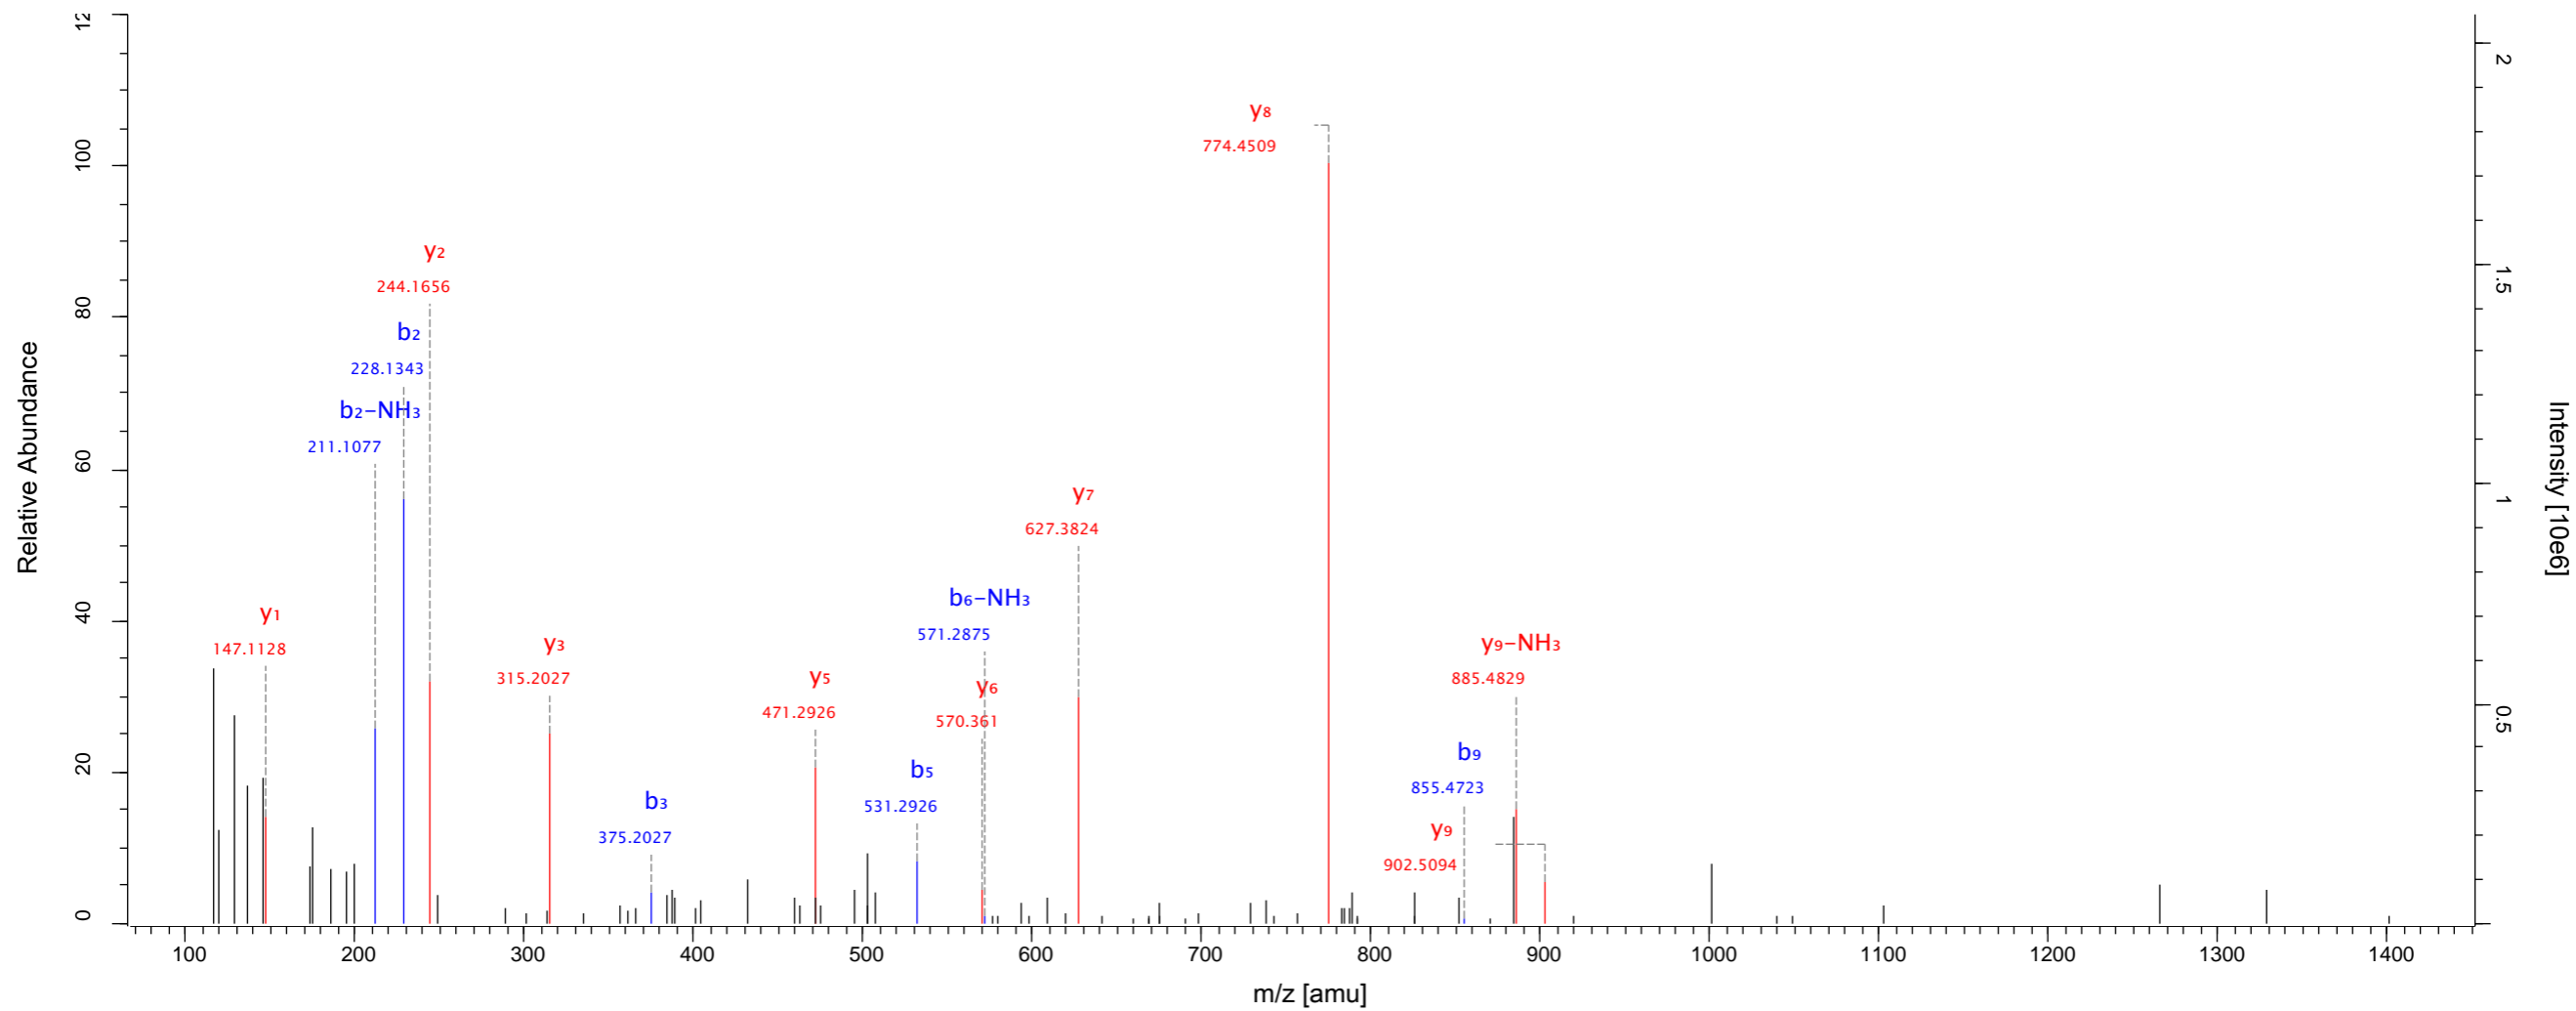

Raw file: 20111212\_EXQ5\_AnMi\_QC\_HCMVp11\_19  
 Scan number: 22404  
 Protein: ORFL294W.iORF1 + NC\_006273.2[183230,193441]+ <unknown description>; ORFL294W + NC\_006273.2[183230,193441]+ <unknown description>  
 Peptide score: 231.26  
 Method: FTMS; HCD

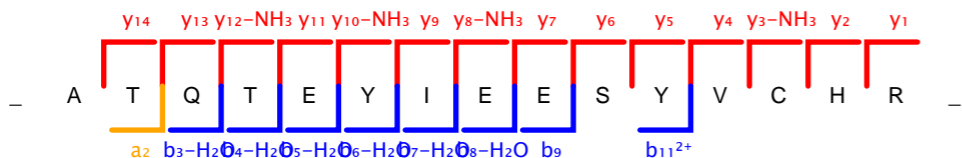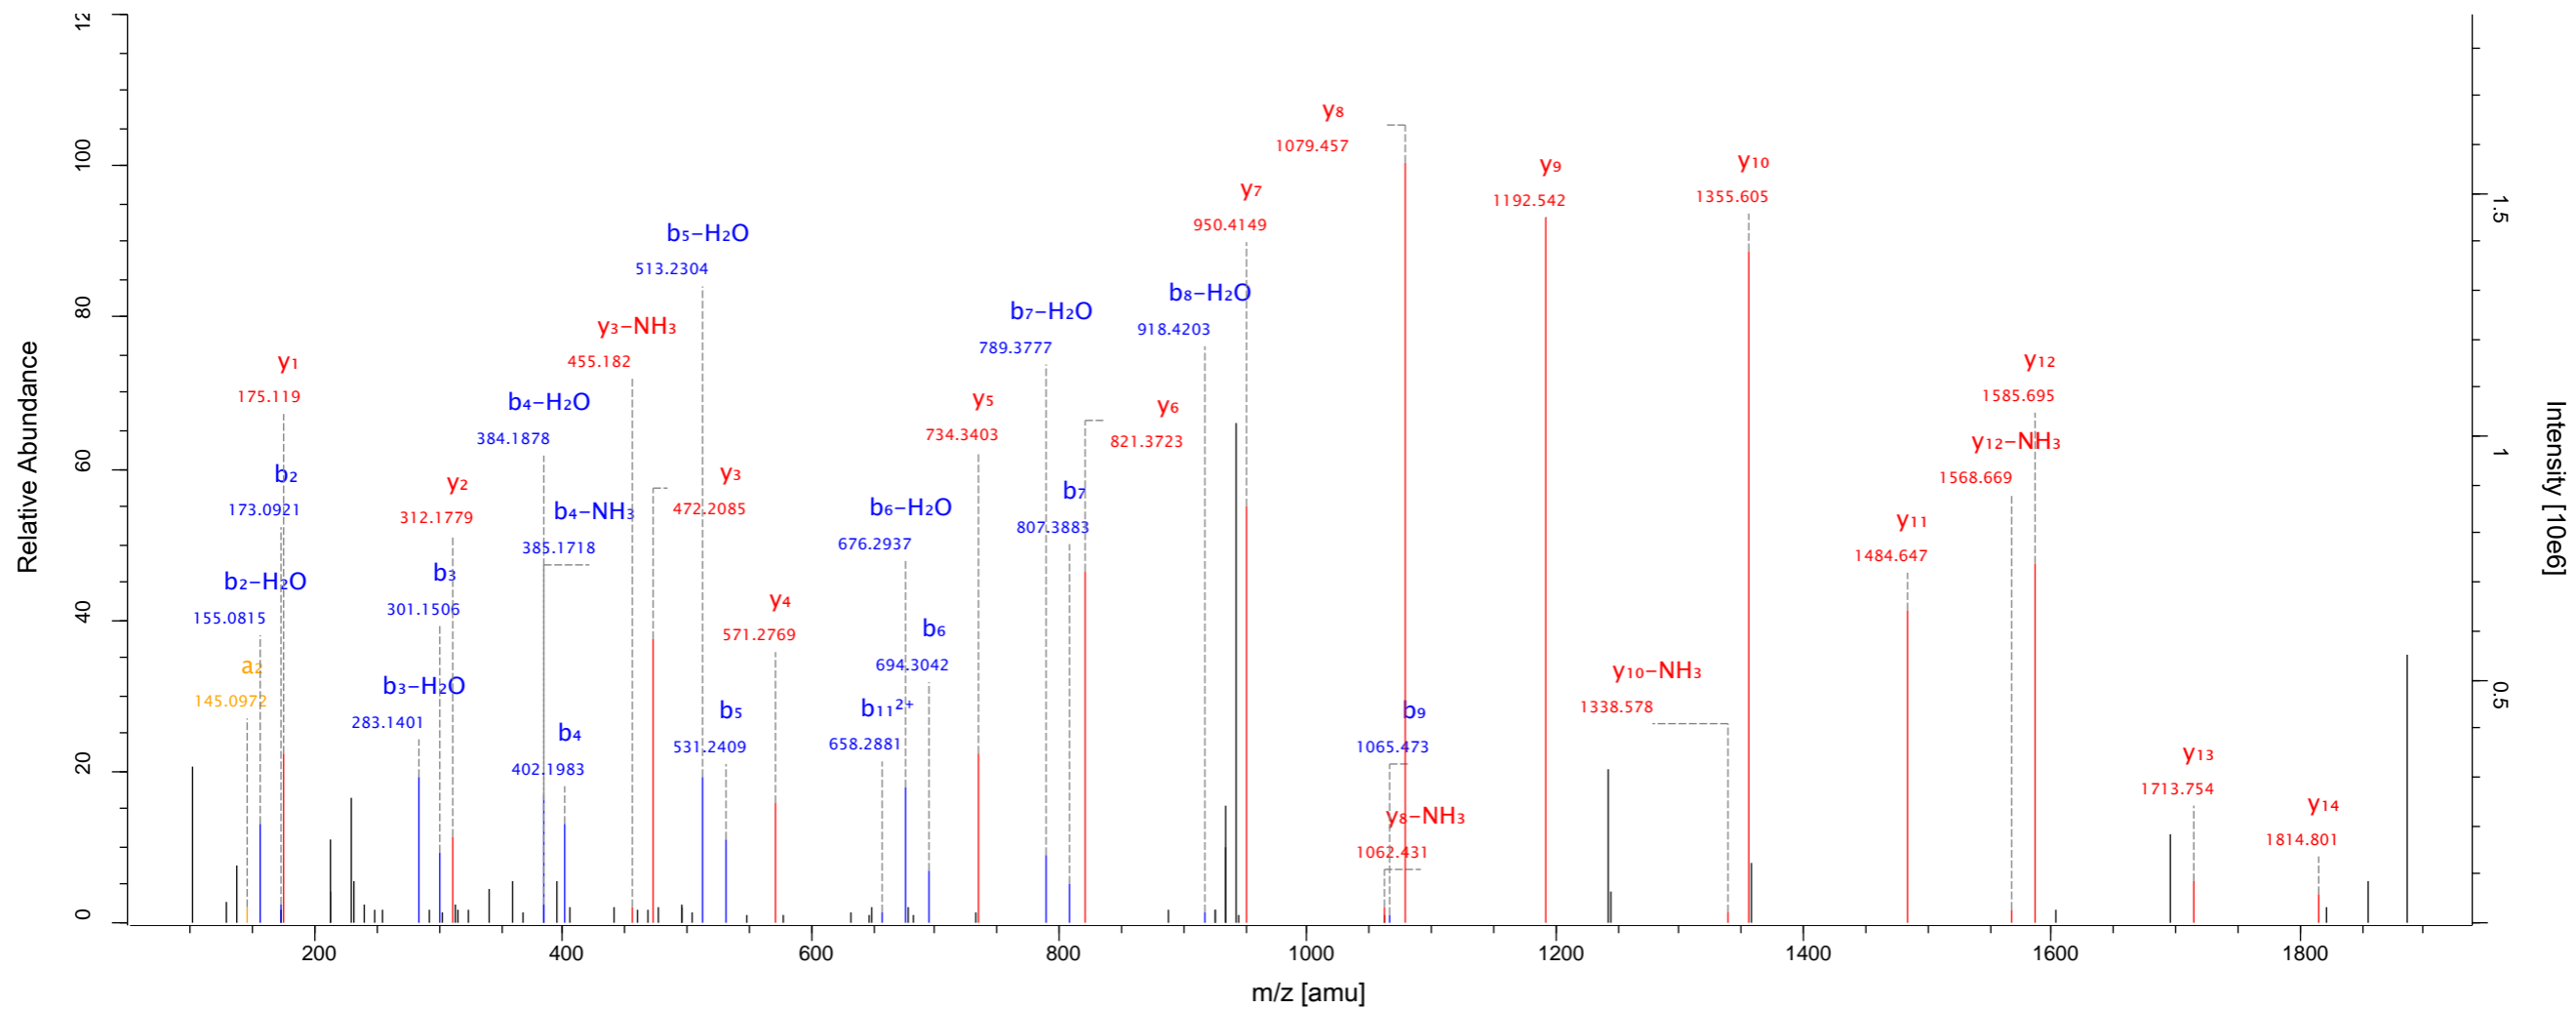

Raw file: 20111212\_EXQ5\_AnMi\_QC\_HCMVp1\_19  
 Scan number: 24618  
 Protein: ORFL224C.iORF1 - NC\_006273.2[134354,134734]- <unknown description>  
 Peptide score: 119.96  
 Method: FTMS; HCD

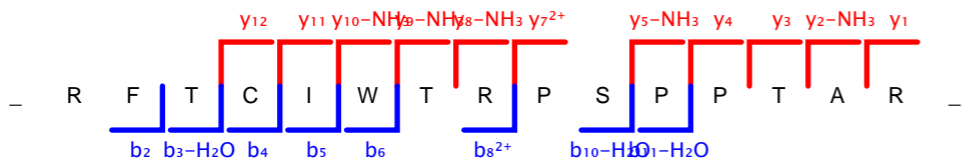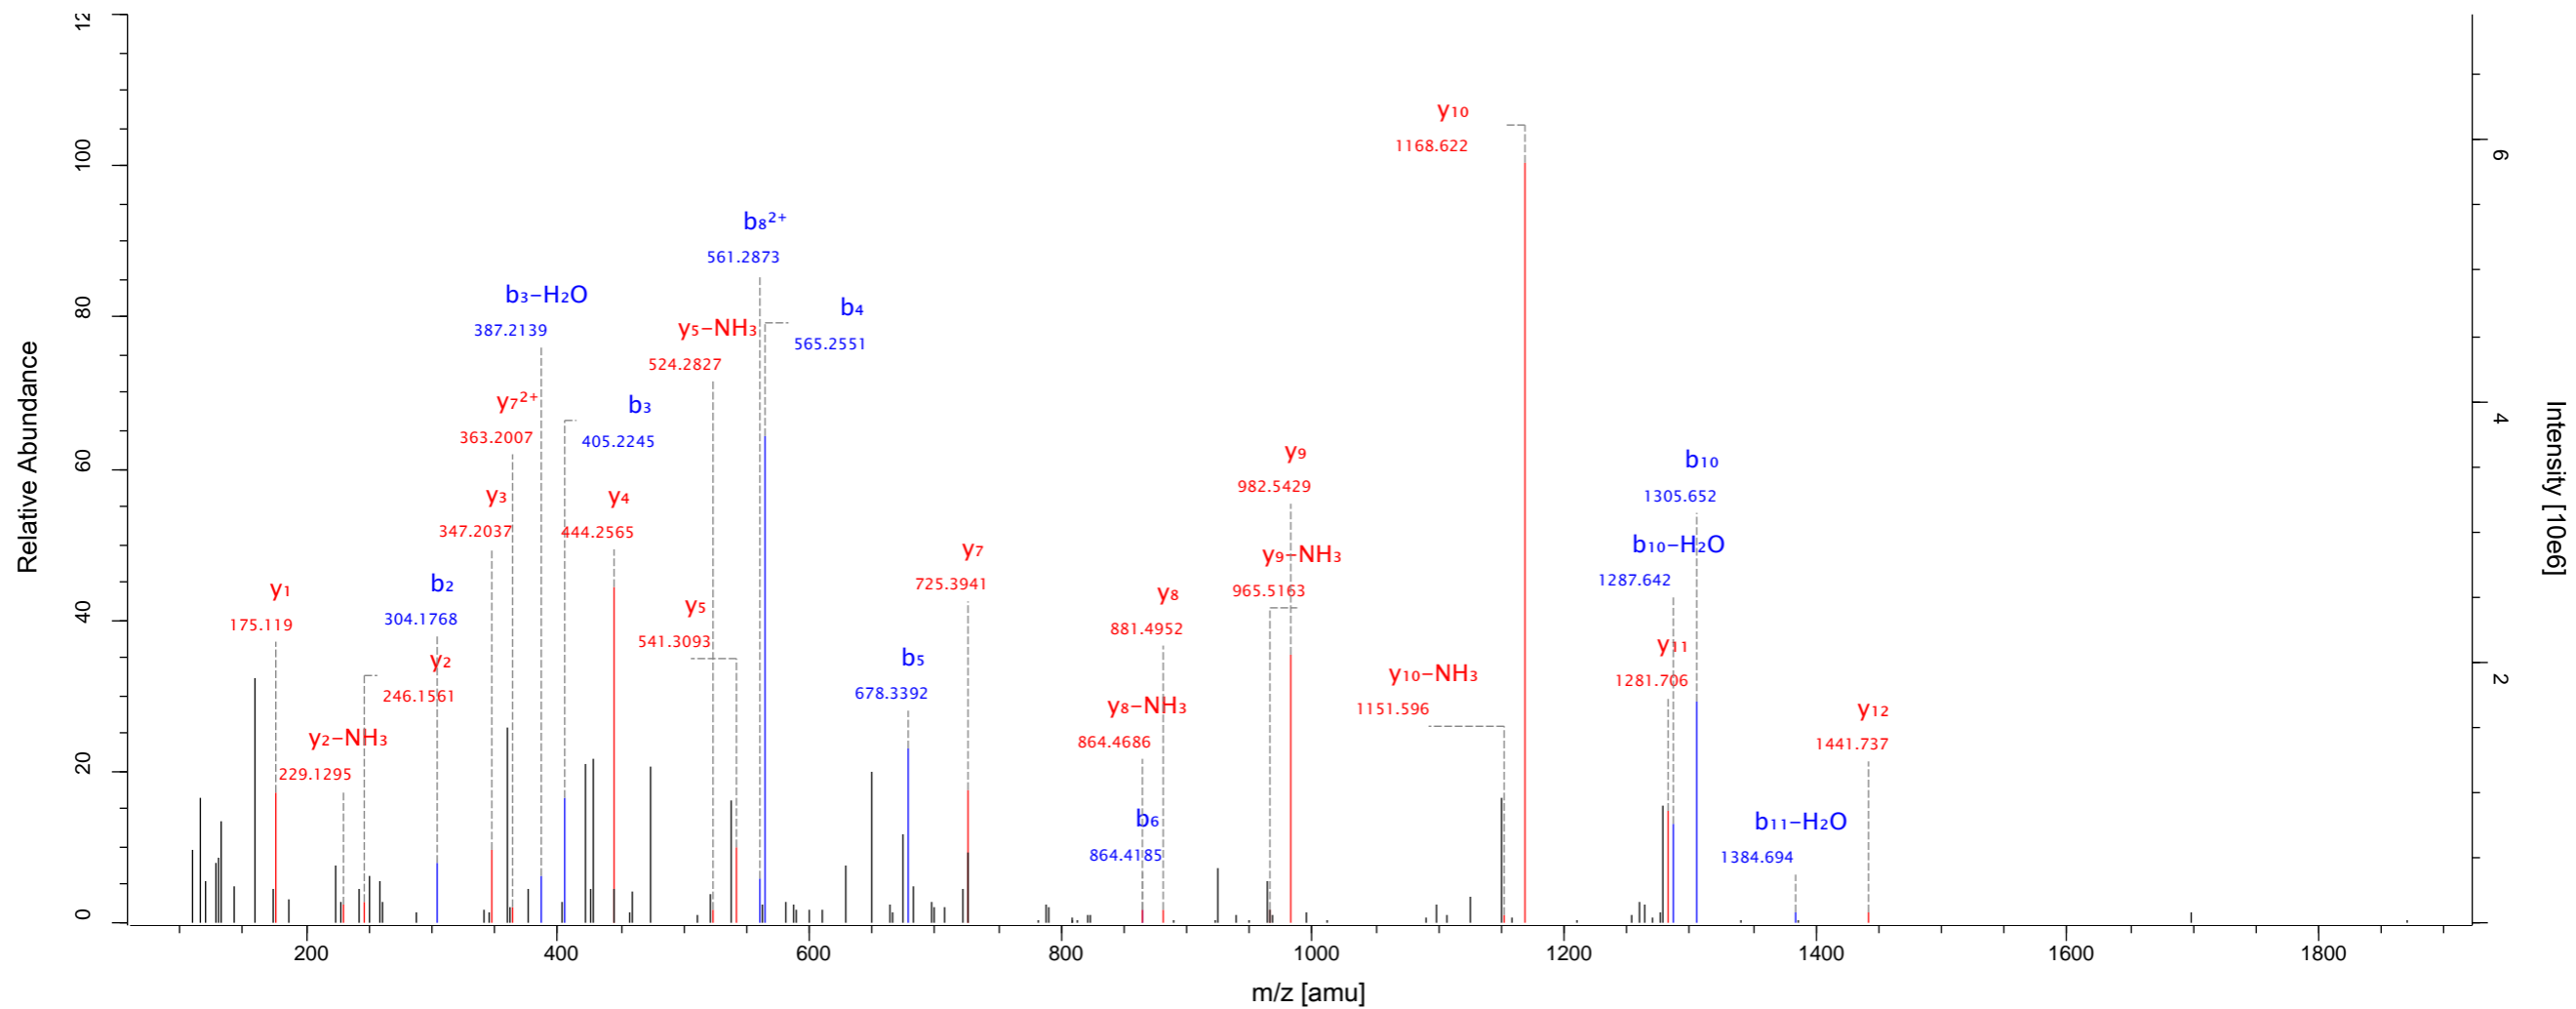

Raw file: 20111212\_EXQ5\_AnMi\_QC\_HCMVp1\_19  
 Scan number: 29780  
 Protein: ORFL86W + NC\_006273.2[38059,38538]+ <unknown description>  
 Peptide score: 210.09  
 Method: FTMS; HCD

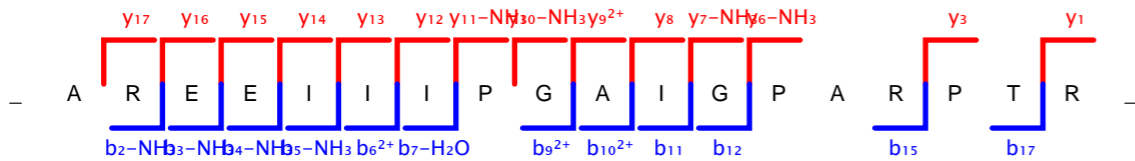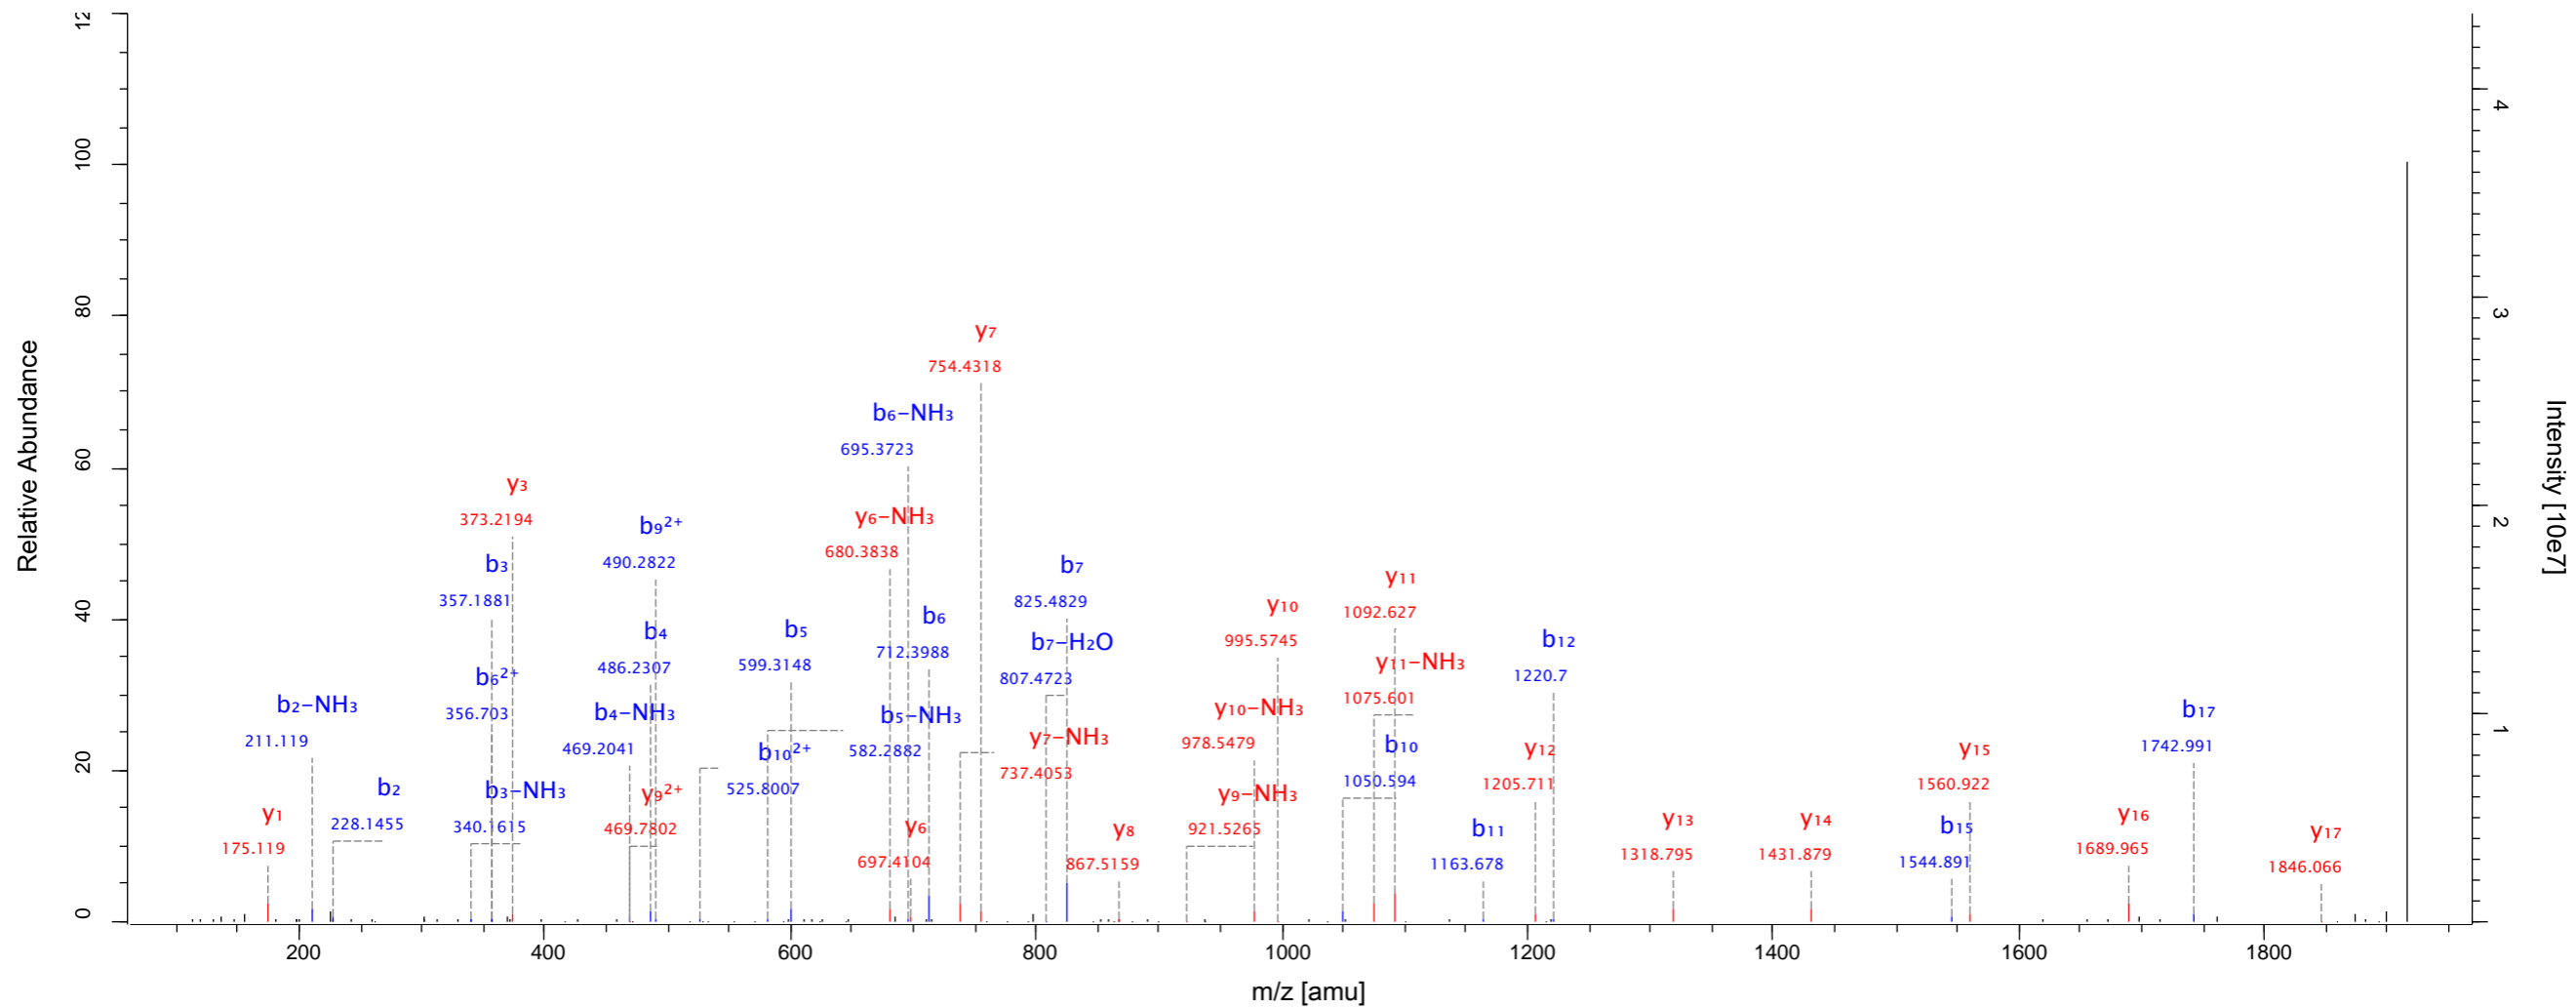



Raw file: 20111212\_EXQ5\_AnMi\_QC\_HCMVp1\_19  
Scan number: 30102  
Protein: ORFL149C.iORF2 - NC\_006273.2[91004,91471]- <unknown description>  
Peptide score: 90.69  
Method: FTMS; HCD

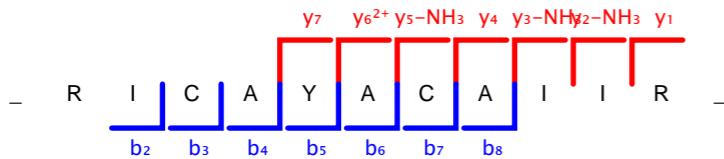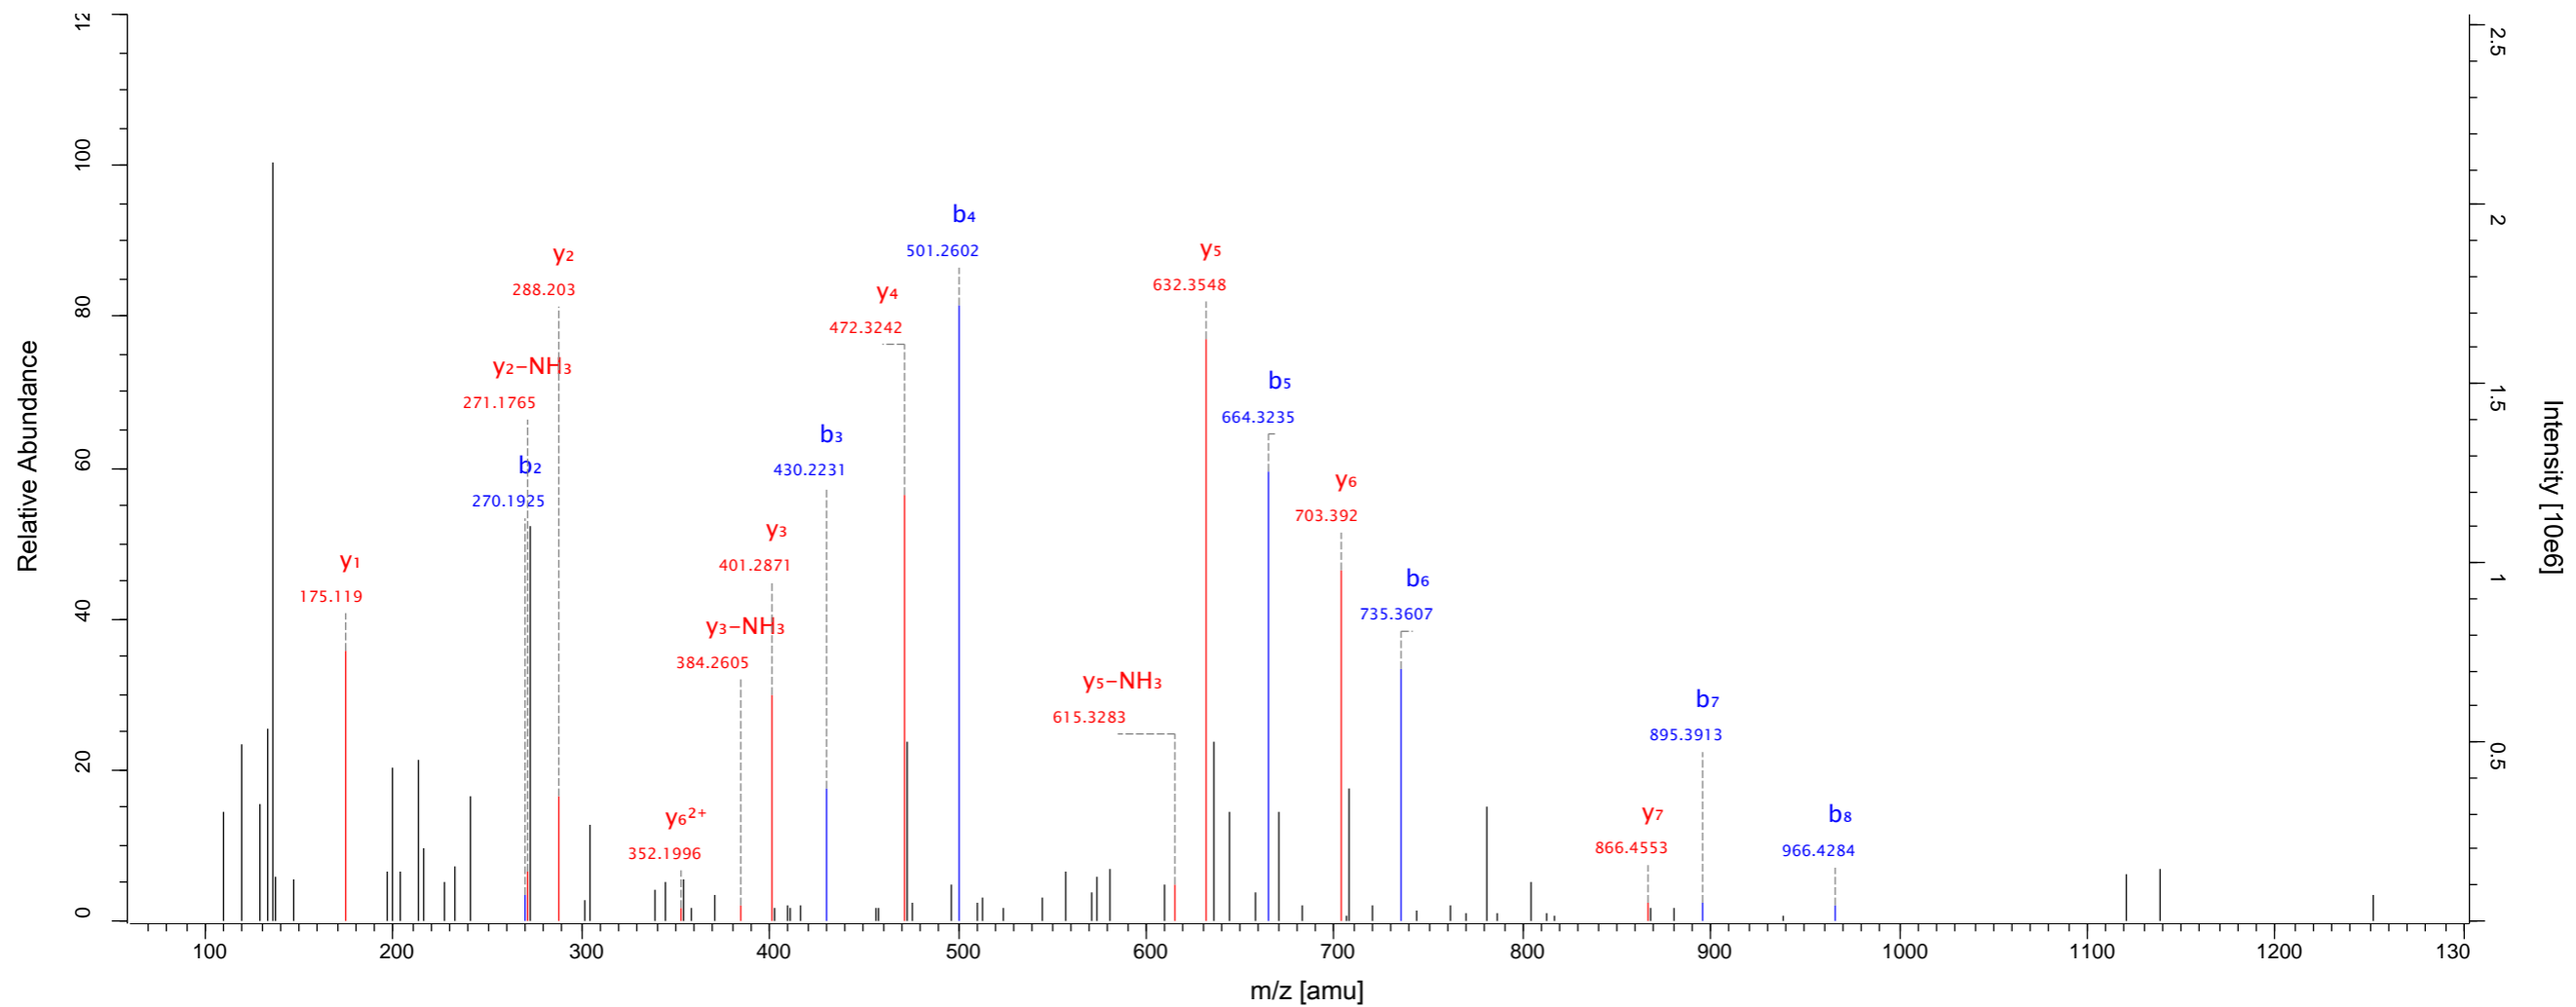

Raw file: 20111212\_EXQ5\_AnMi\_QC\_HCMVp1\_19  
Scan number: 35002  
Protein: ORFL149C.iORF2 - NC\_006273.2[91004,91471]- <unknown description>  
Peptide score: 99.51  
Method: FTMS; HCD

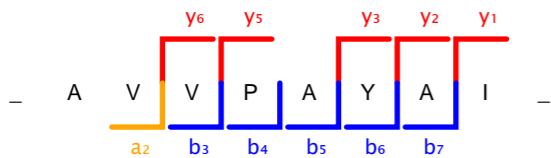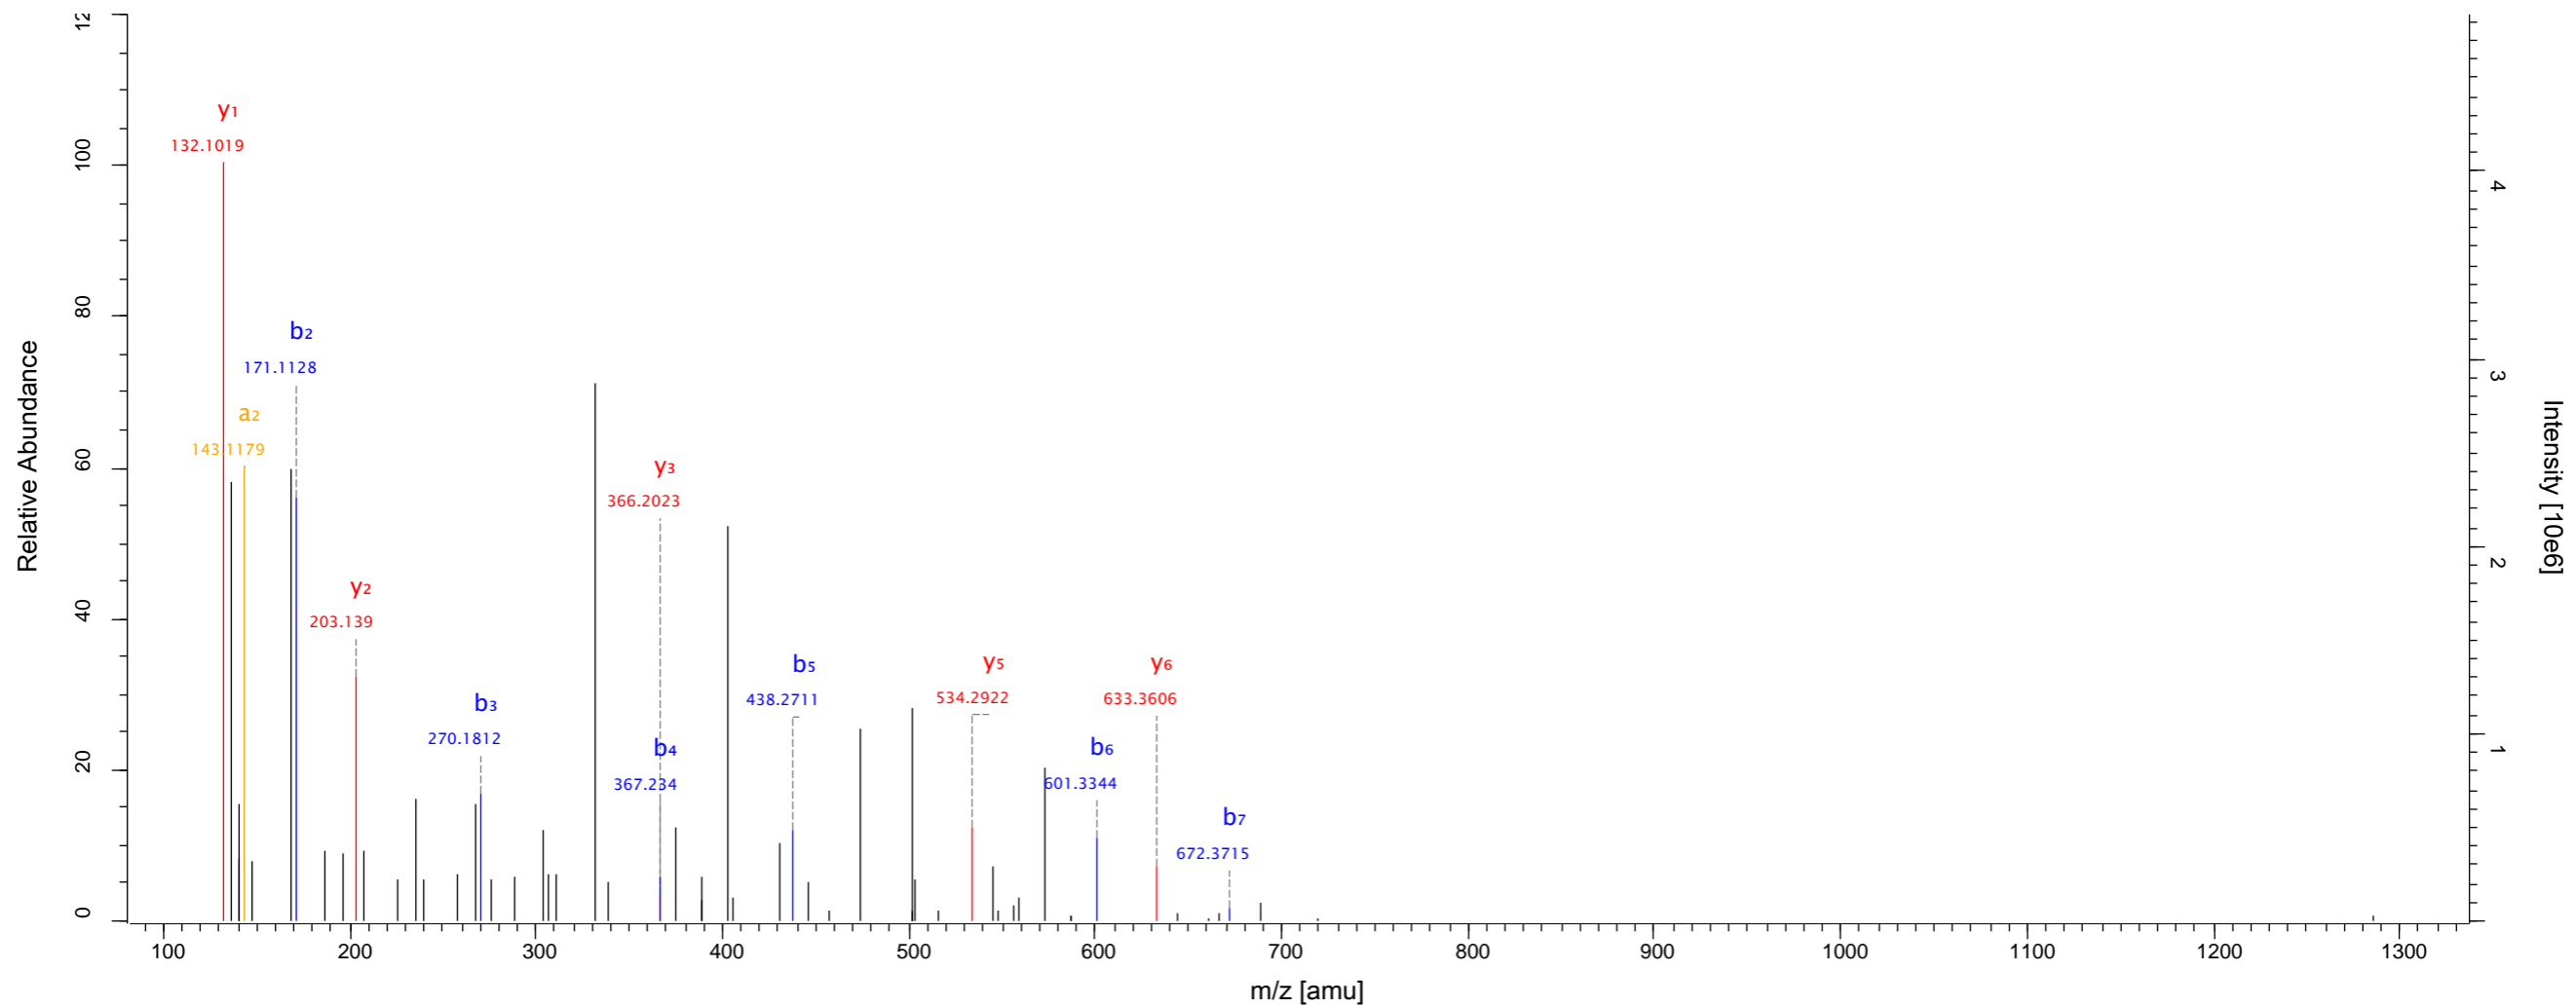

Raw file: 20111212\_EXQ5\_AnMi\_QC\_HCMVp1\_19  
 Scan number: 35617  
 Protein: ORFL130W + NC\_006273.2[72313,72744]+ <unknown description>  
 Peptide score: 132.25  
 Method: FTMS; HCD

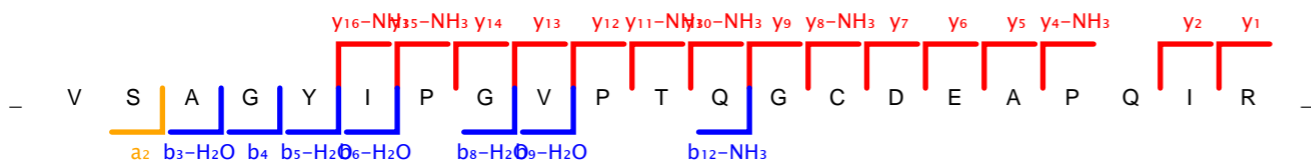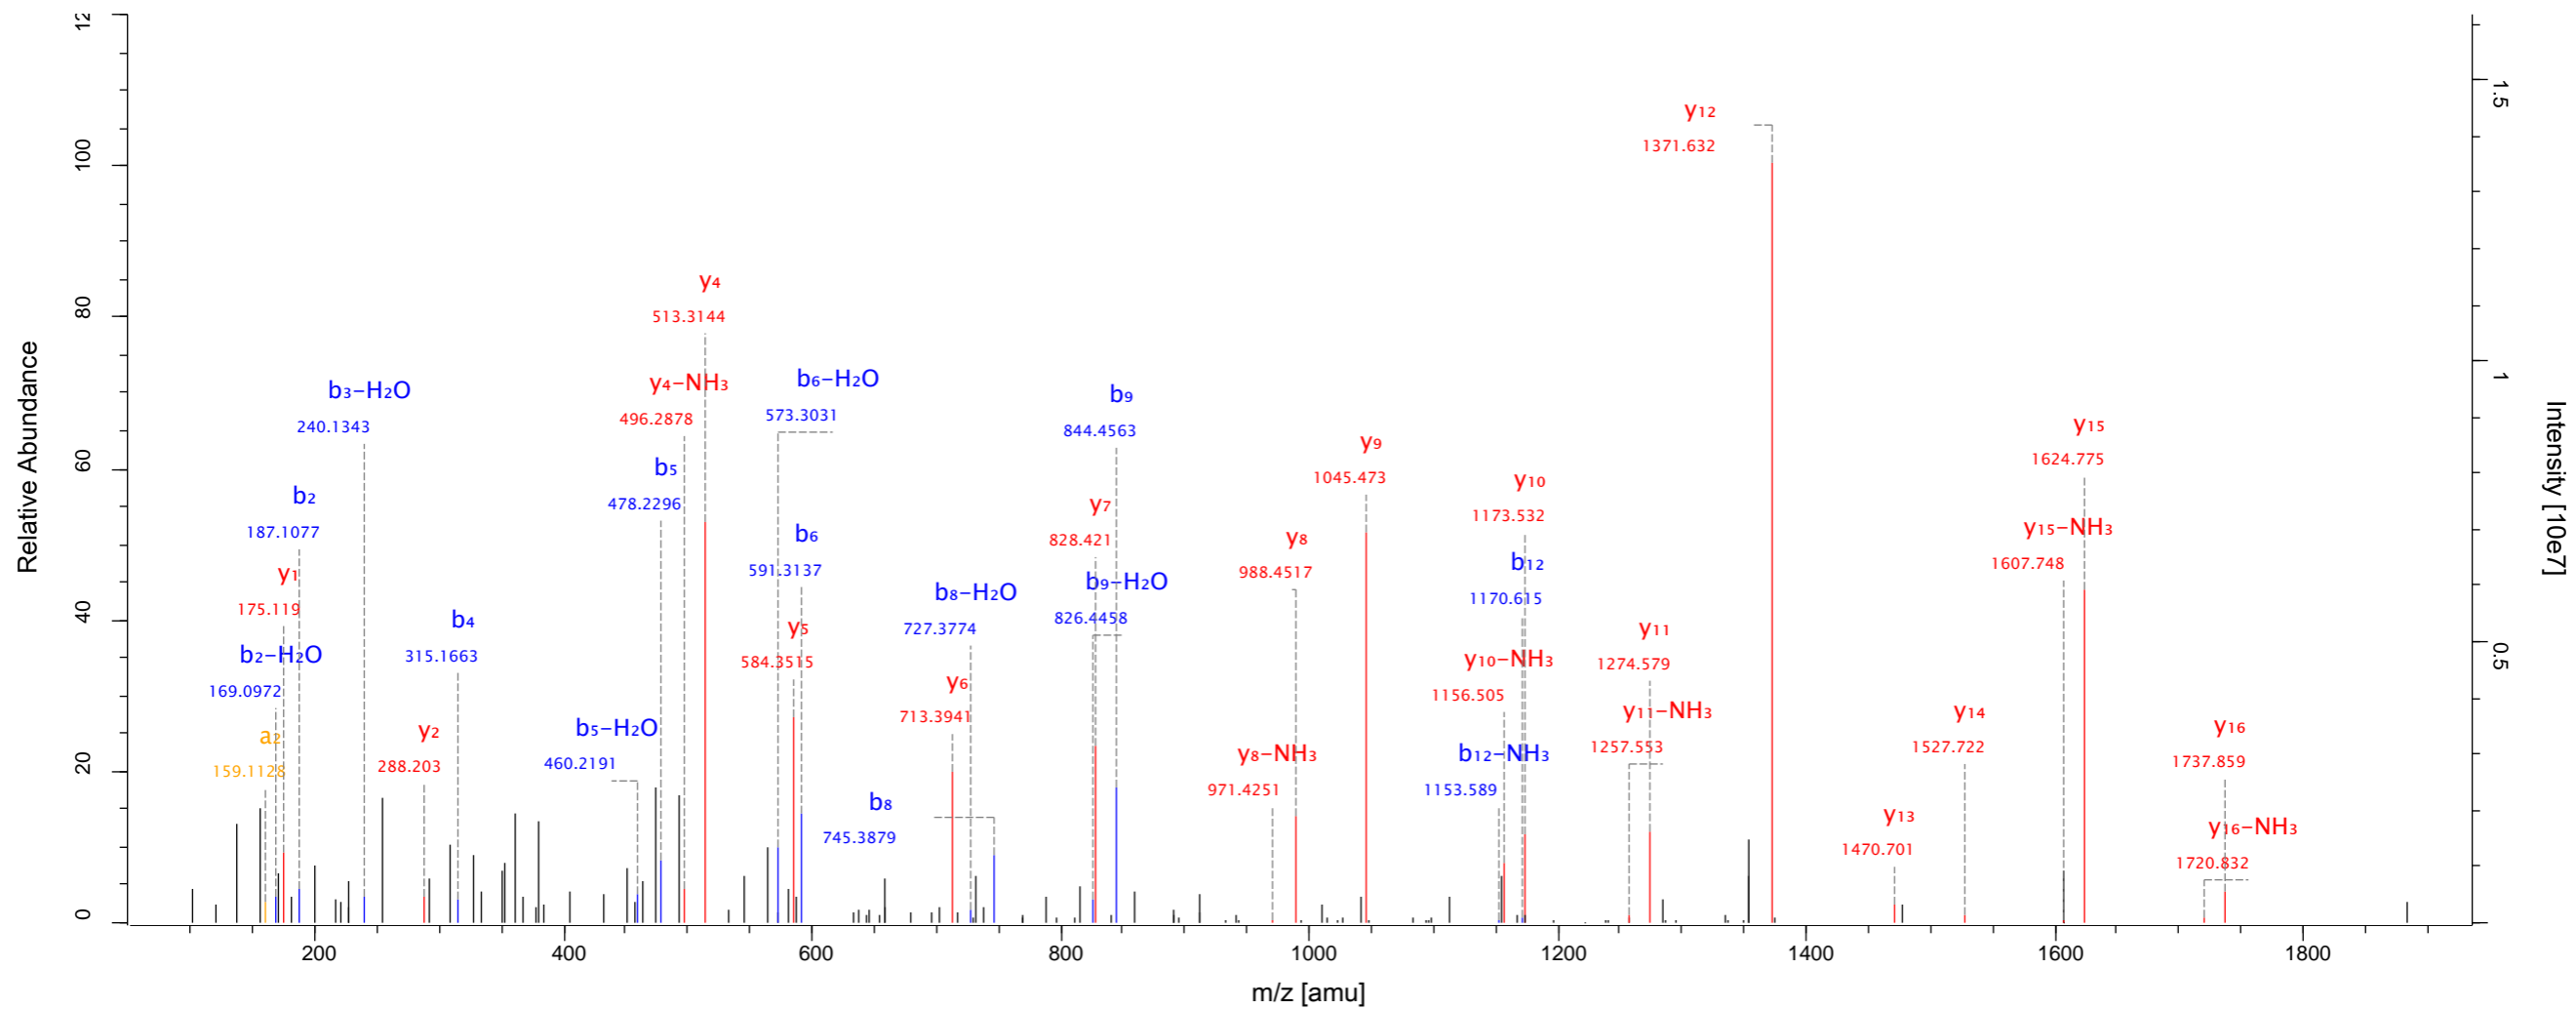

Raw file: 20111212\_EXQ5\_AnMi\_QC\_HCMVp11\_19  
Scan number: 36733  
Protein: ORFS365W + NC\_006273.2[225950,226606]+ <unknown description>  
Peptide score: 177.57  
Method: FTMS; HCD

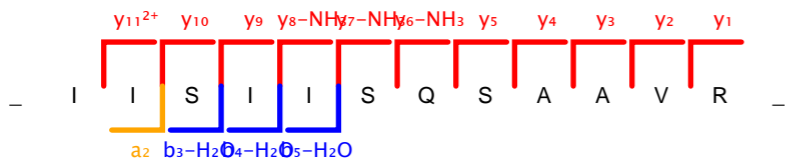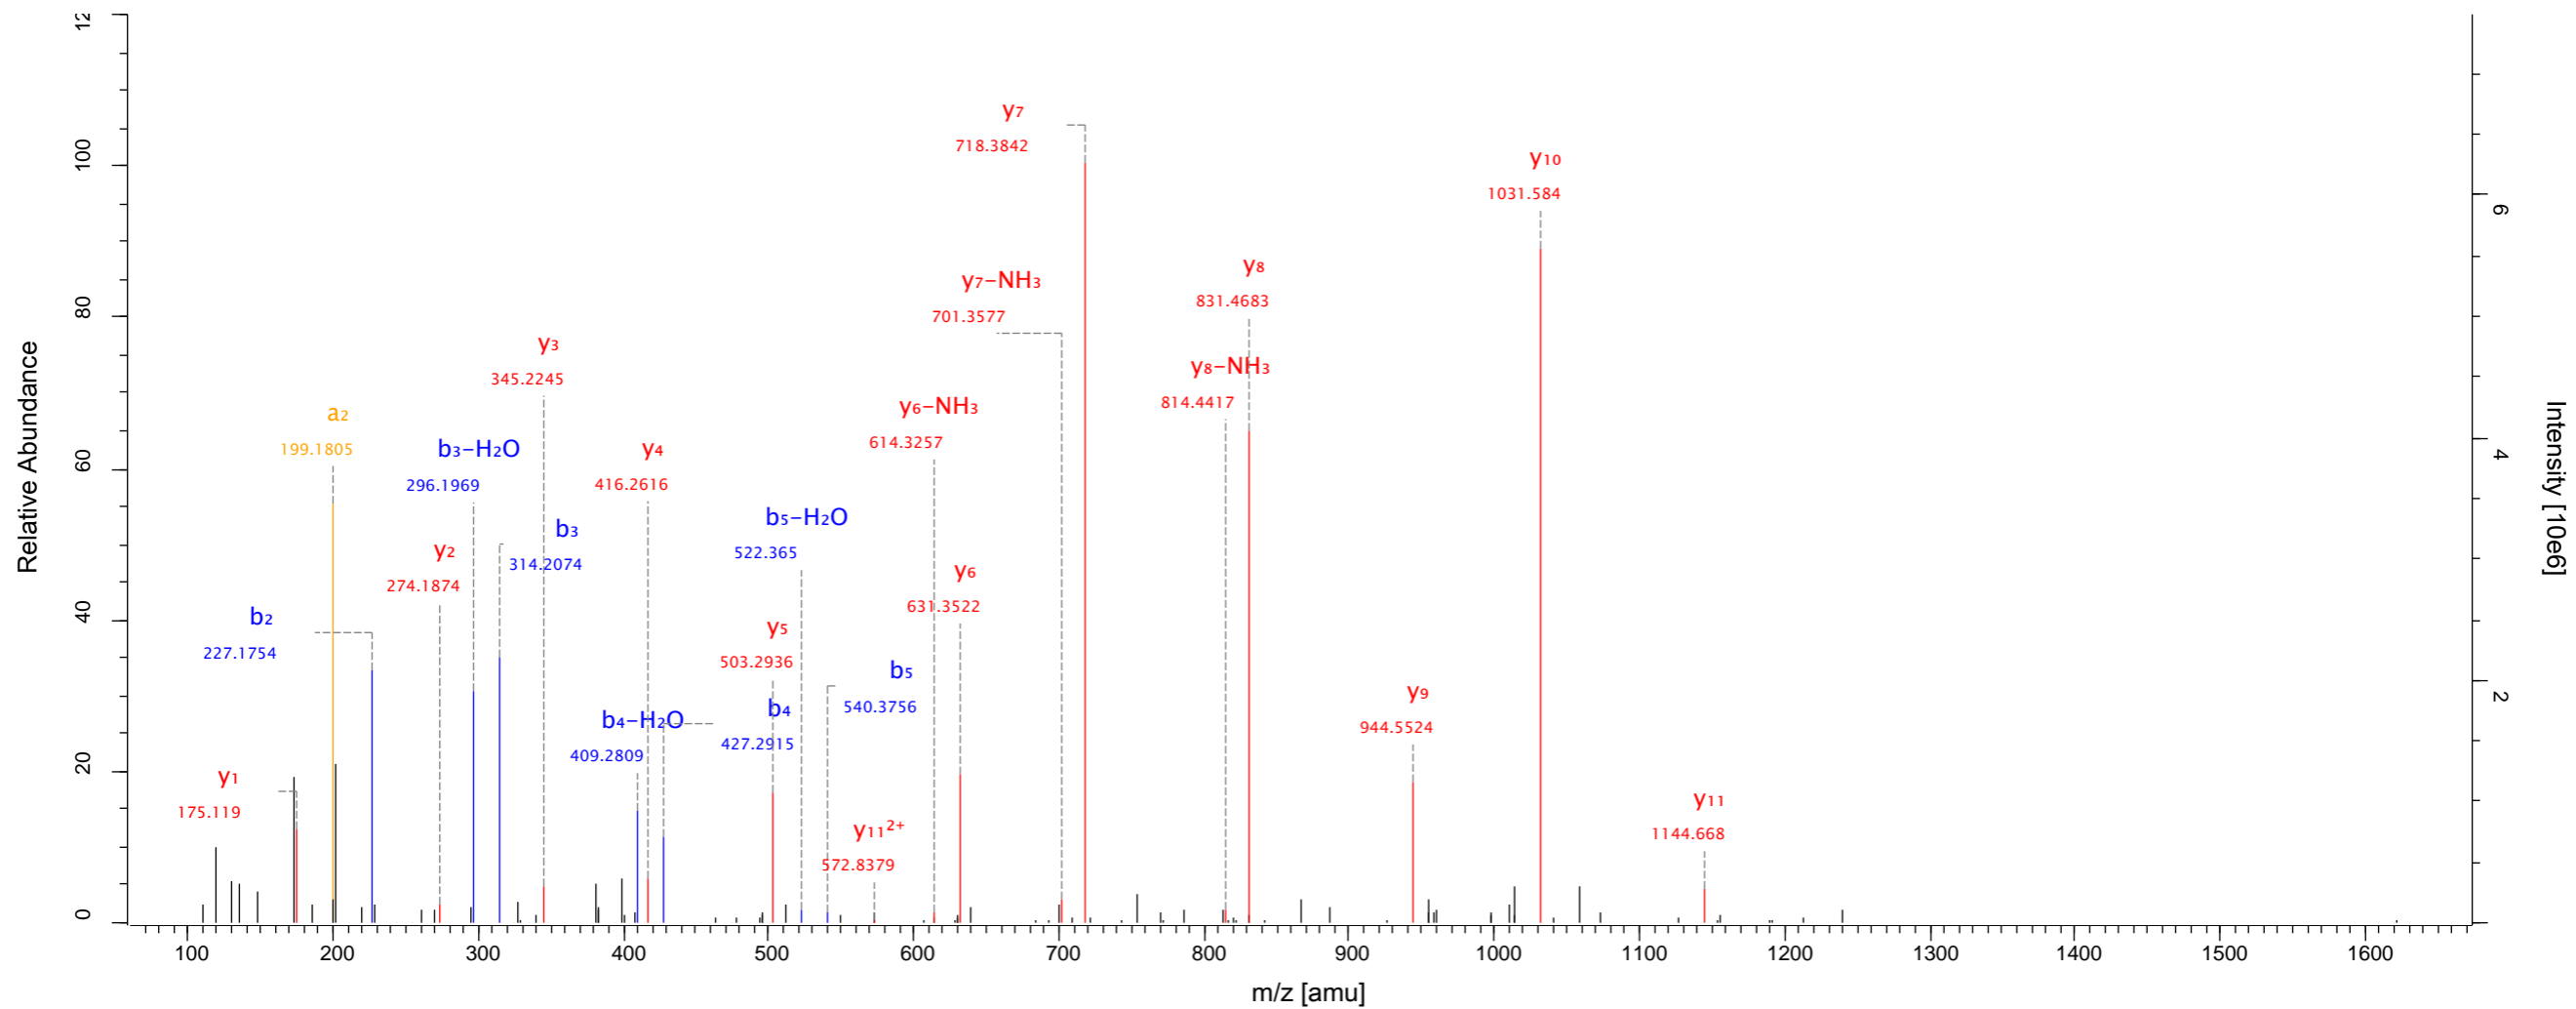

Raw file: 20111212\_EXQ5\_AnMi\_QC\_HCMVp1\_19  
 Scan number: 37966  
 Protein: ORFL130W + NC\_006273.2[72313,72744]+ <unknown description>  
 Peptide score: 218.76  
 Method: FTMS; HCD

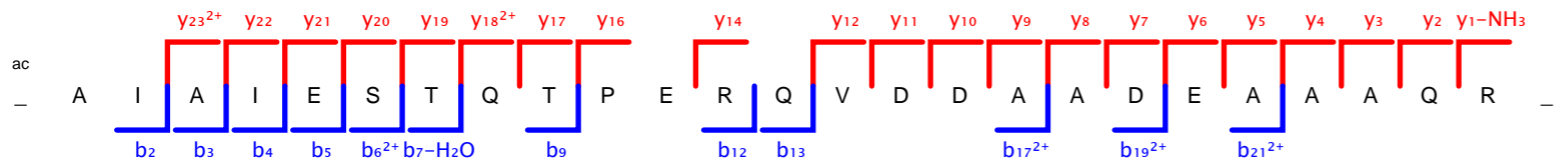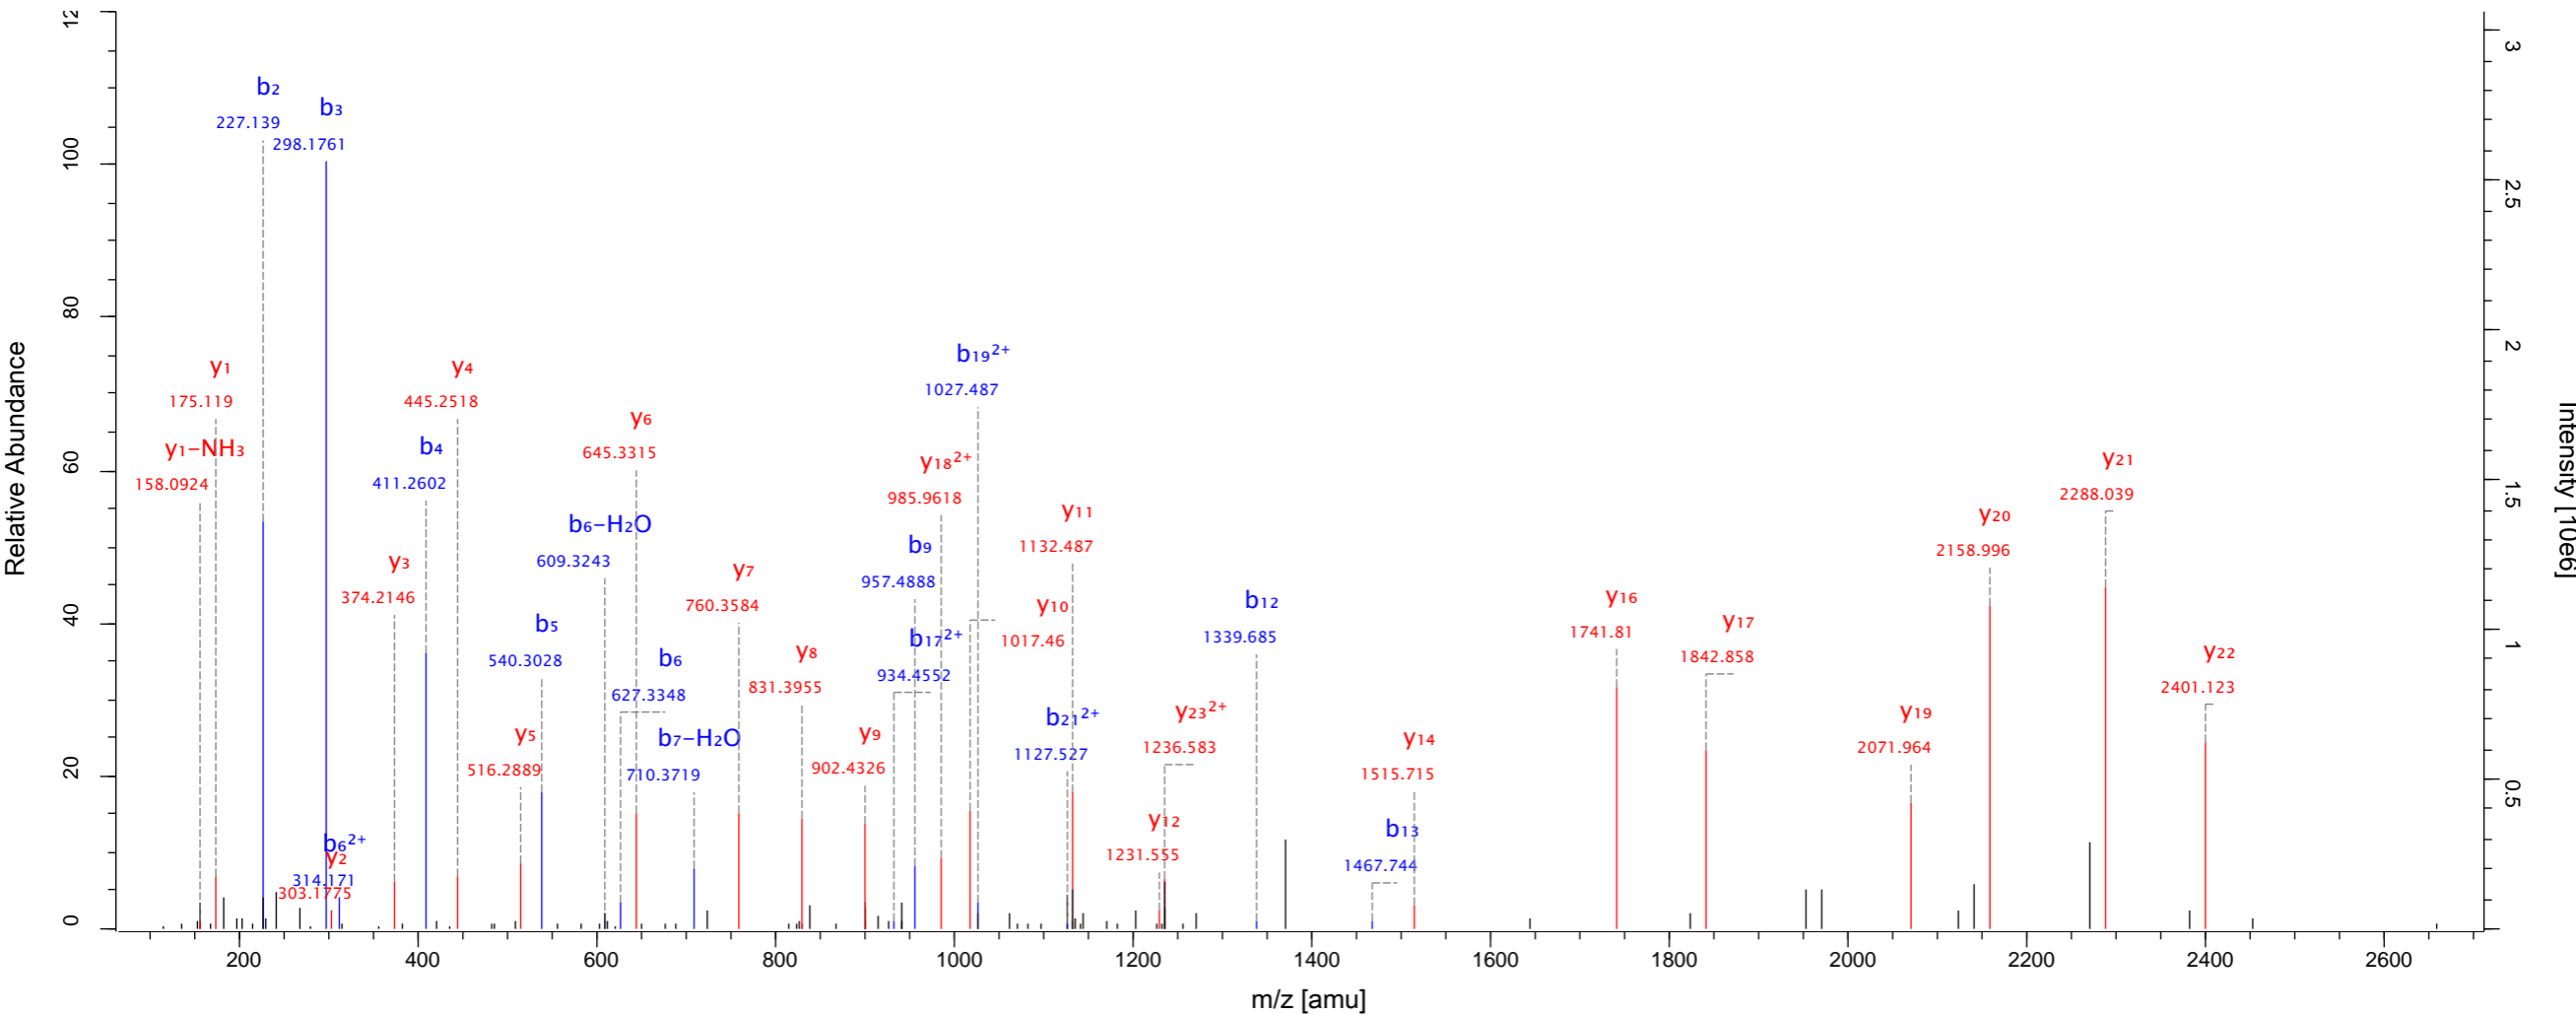

Raw file: 20111212\_EXQ5\_AnMi\_QC\_HCMVp1\_19  
 Scan number: 39235  
 Protein: ORFL119C - NC\_006273.2[63363,63800]- <unknown description>  
 Peptide score: 115.15  
 Method: FTMS; HCD

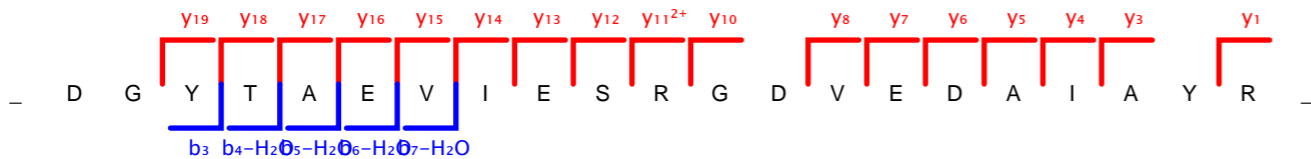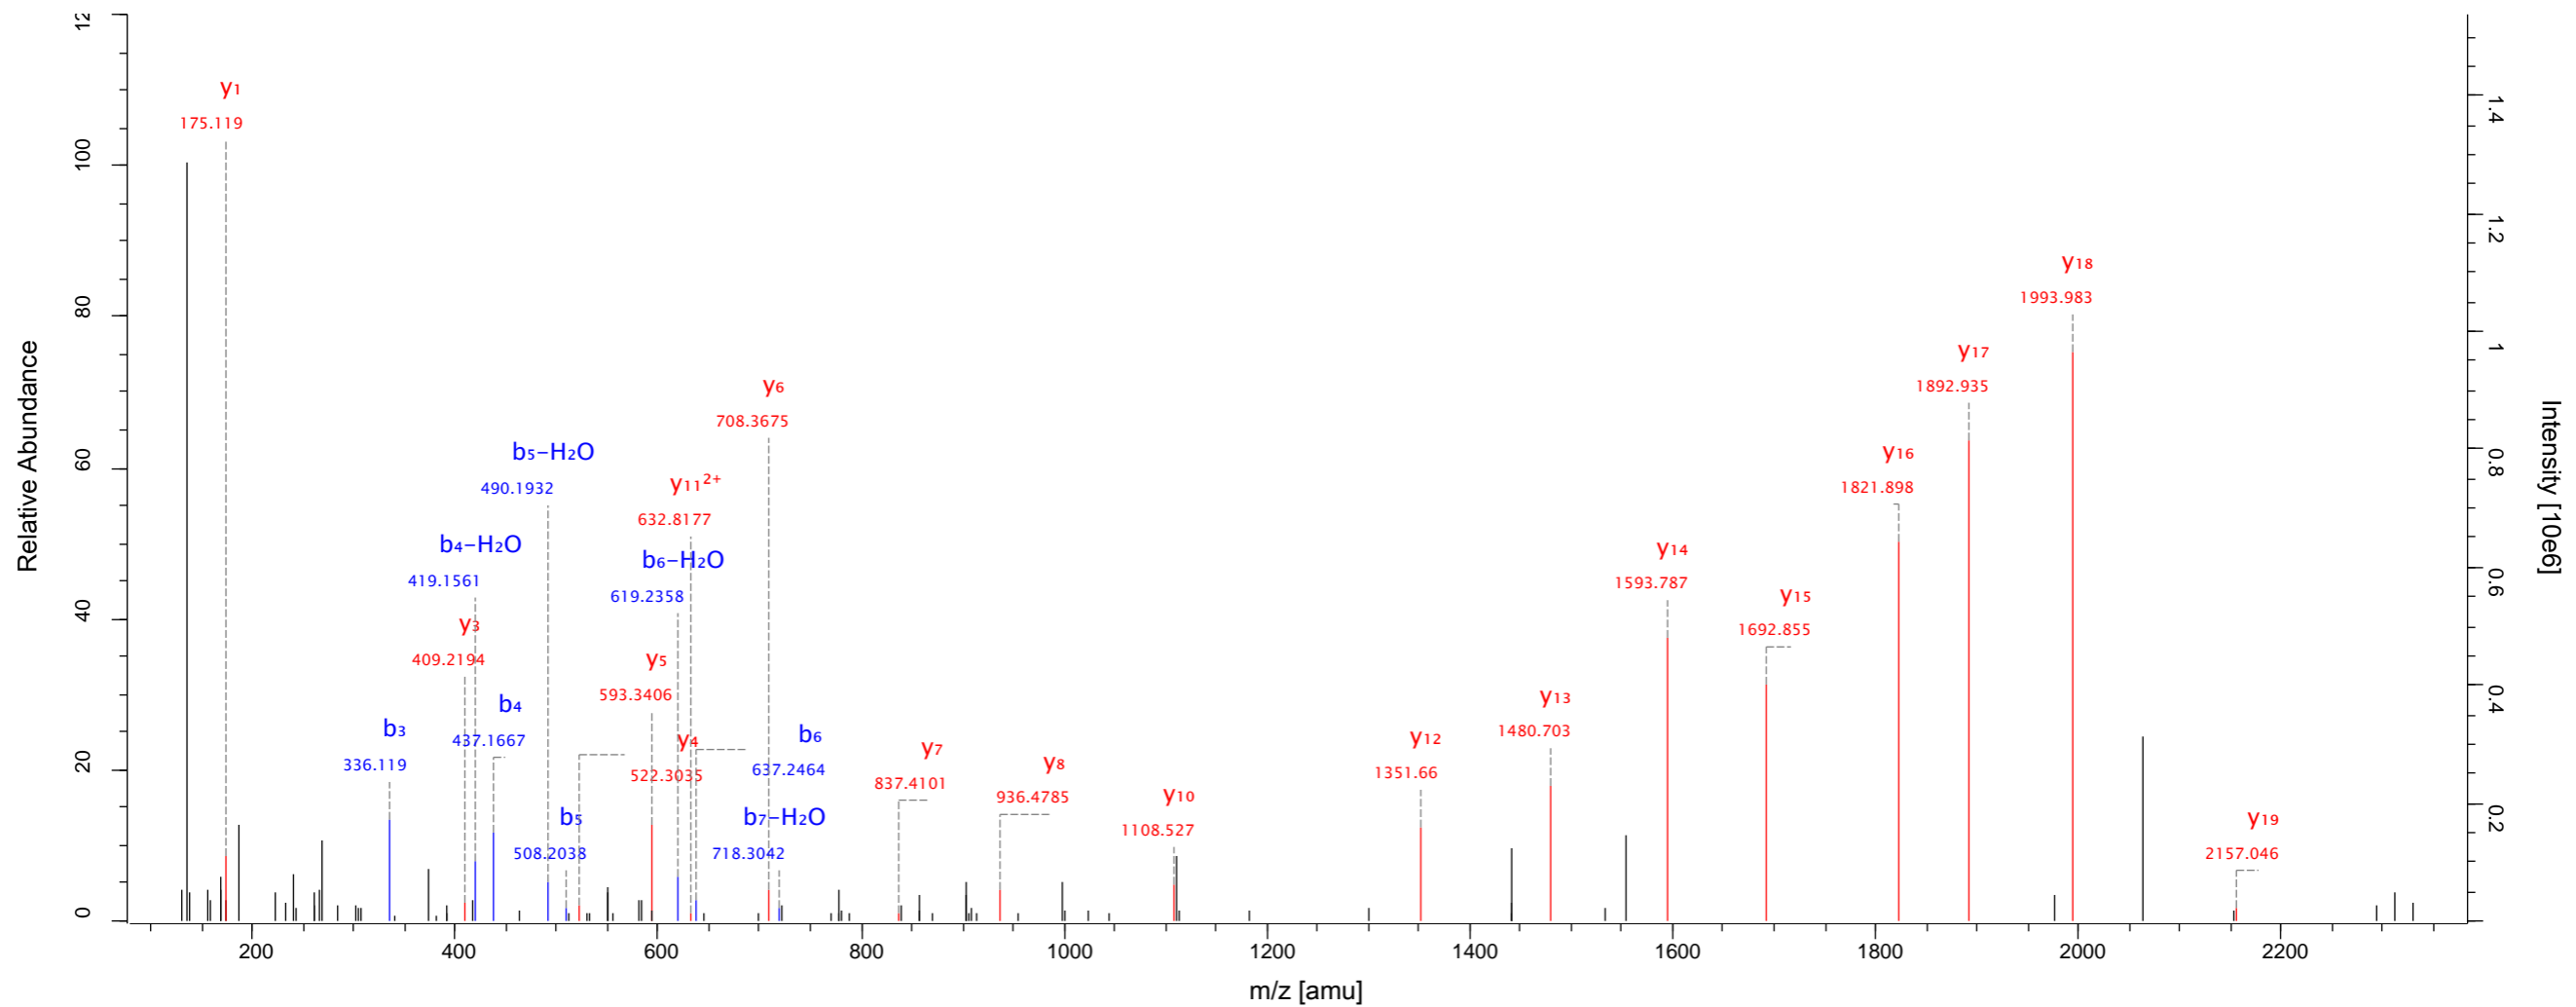

Raw file: 20111212\_EXQ5\_AnMi\_QC\_HCMVp1\_19  
 Scan number: 39968  
 Protein: ORFL119C - NC\_006273.2[63363,63800]- <unknown description>  
 Peptide score: 222.7  
 Method: FTMS; HCD

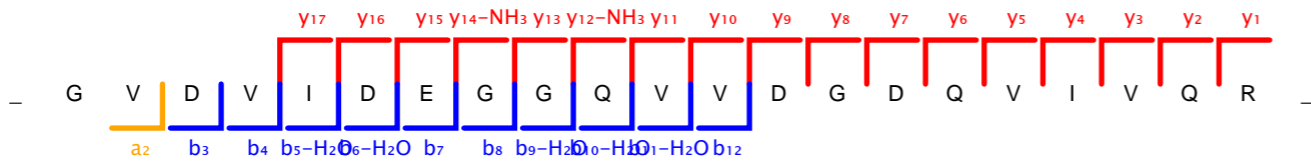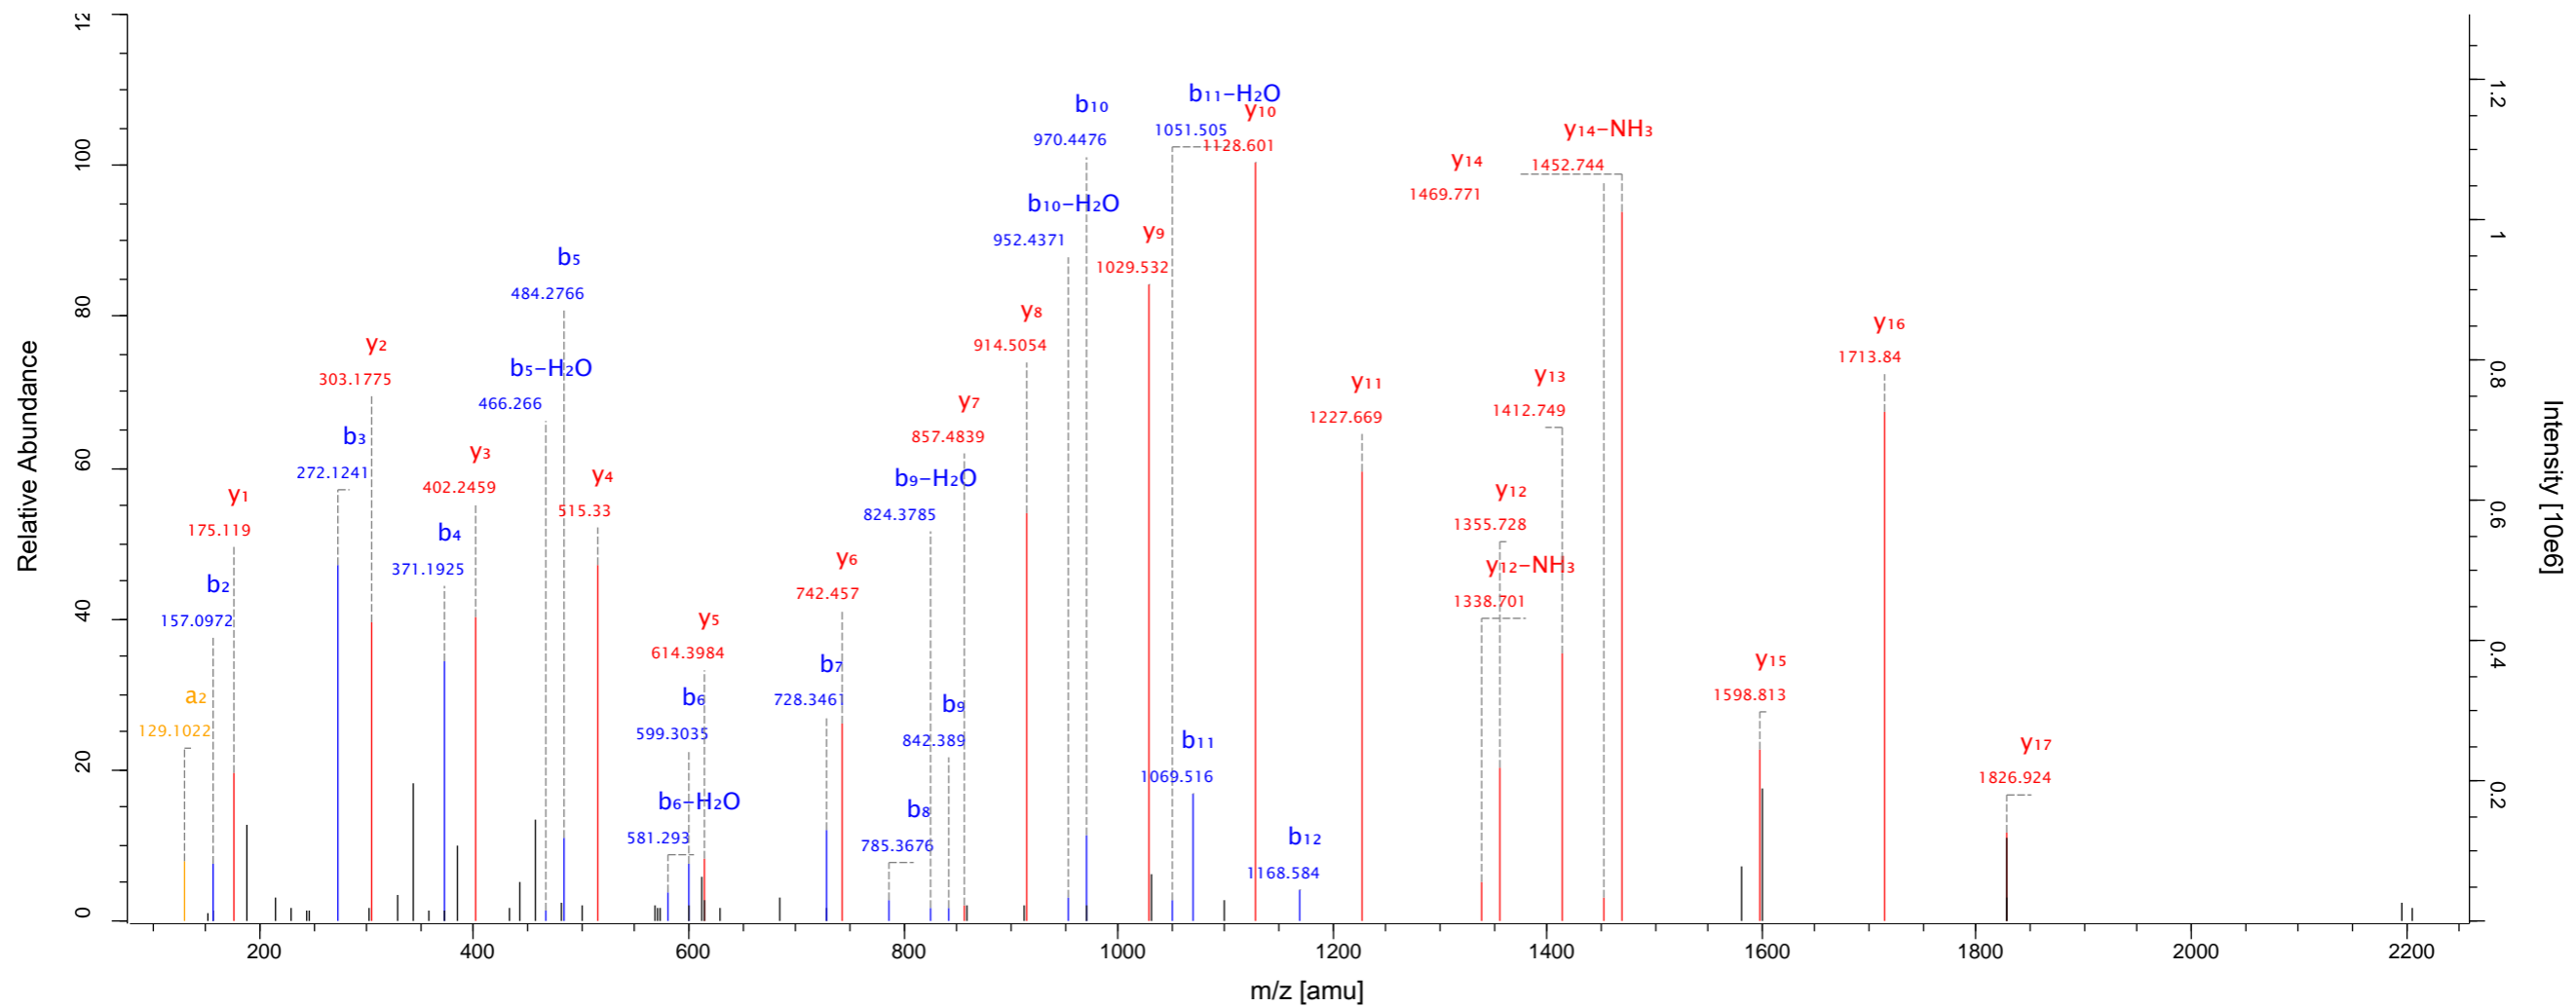

Raw file: 20111212\_EXQ5\_AnMi\_QC\_HCMVp1\_19  
 Scan number: 44064  
 Protein: ORFL161C.iORF2 - NC\_006273.2[101063,101479]- <unknown description>  
 Peptide score: 150.1  
 Method: FTMS; HCD

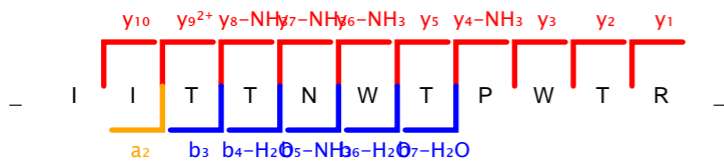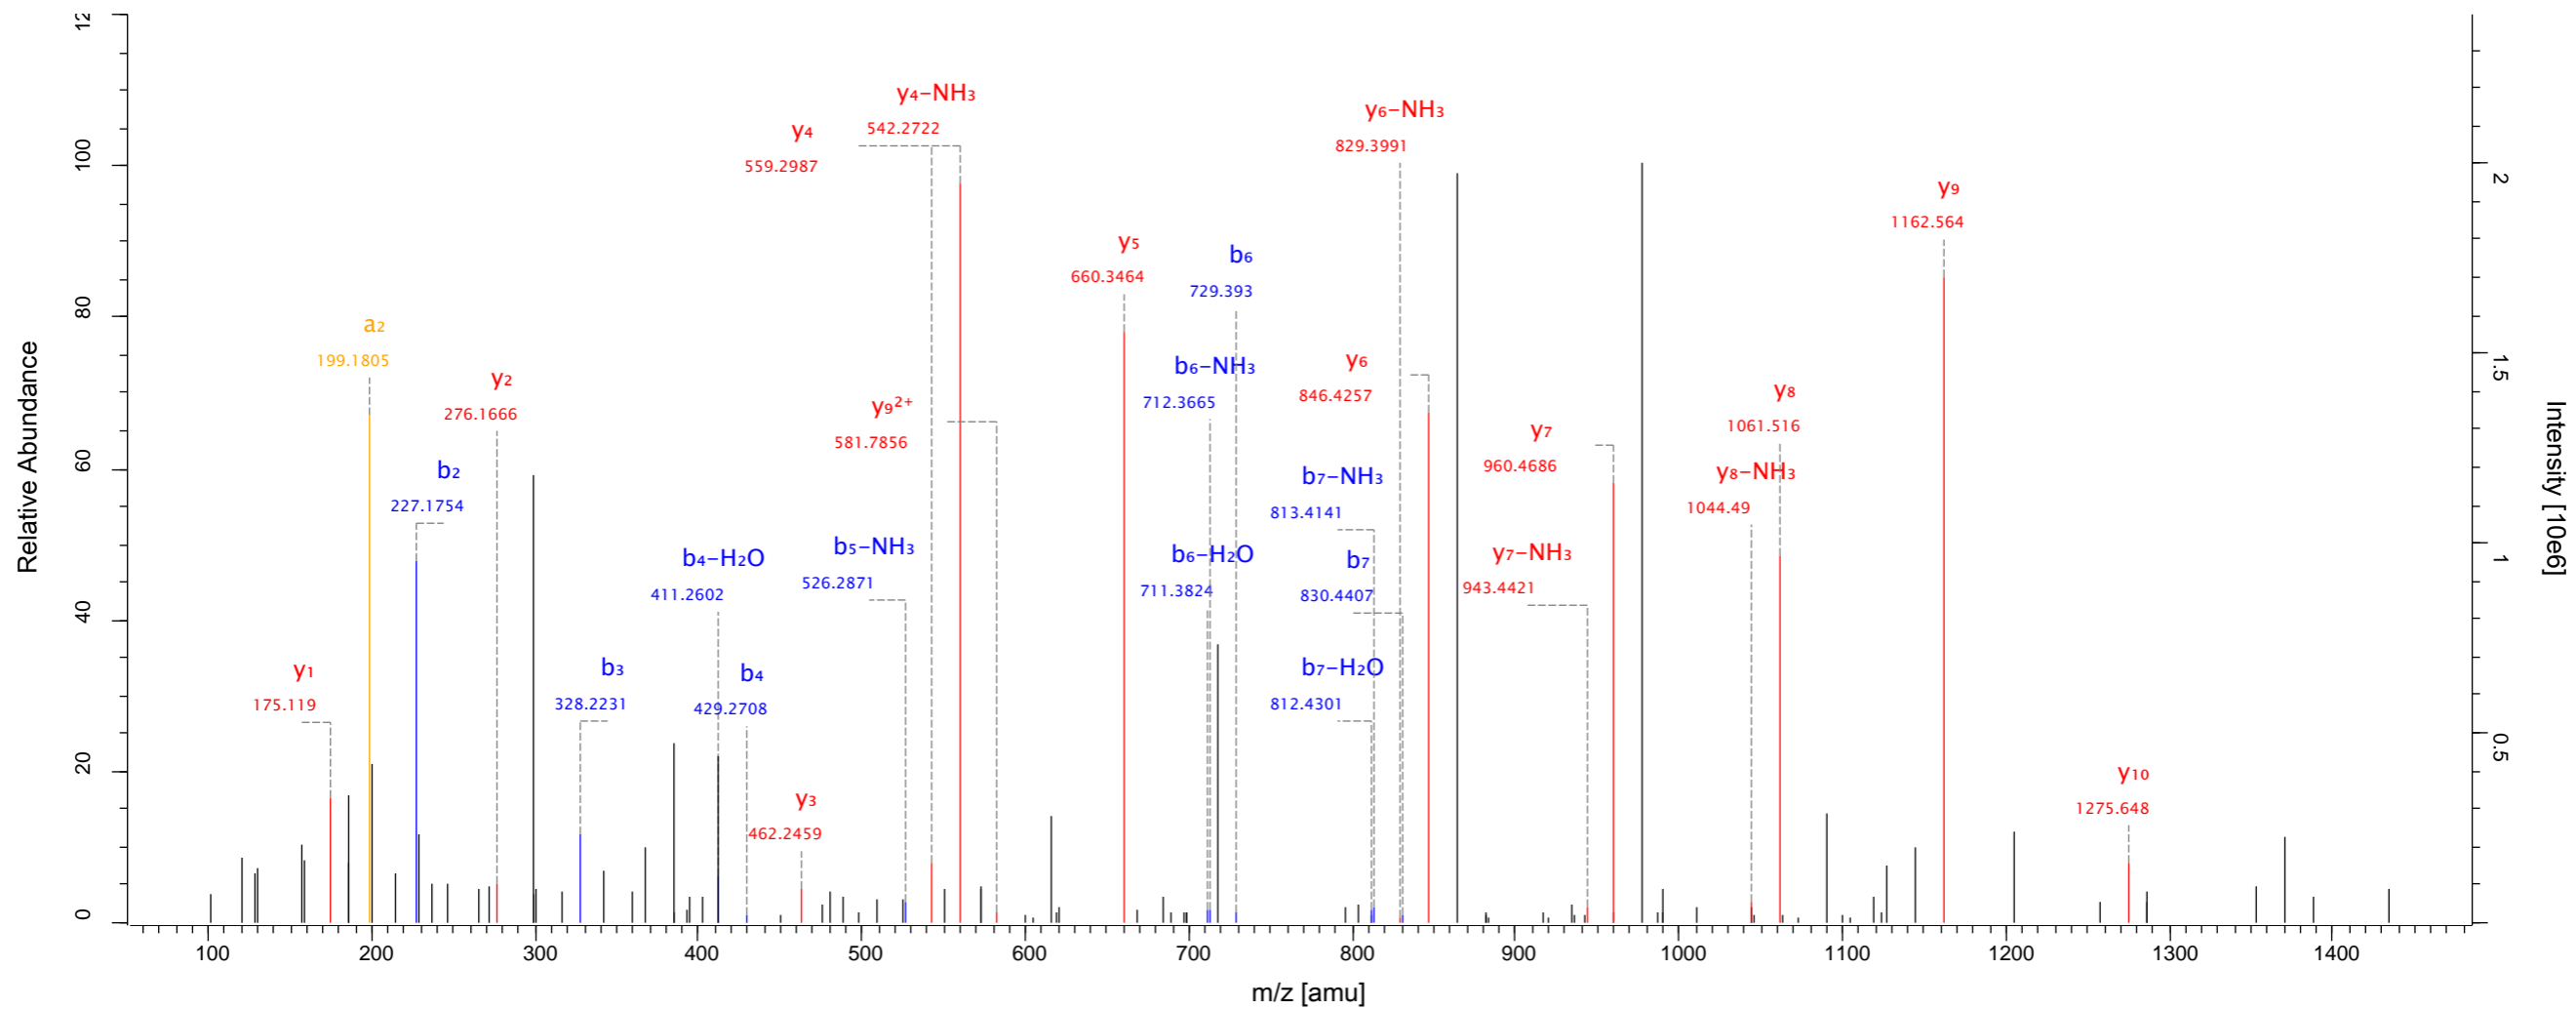



Raw file: 20111212\_EXQ5\_AnMi\_QC\_HCMVp11\_19  
Scan number: 48526  
Protein: ORFL161C.iORF2 - NC\_006273.2[101063,101479]- <unknown description>  
Peptide score: 89.4  
Method: FTMS; HCD

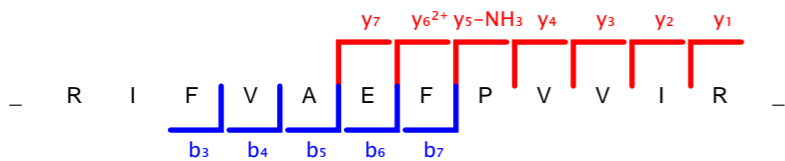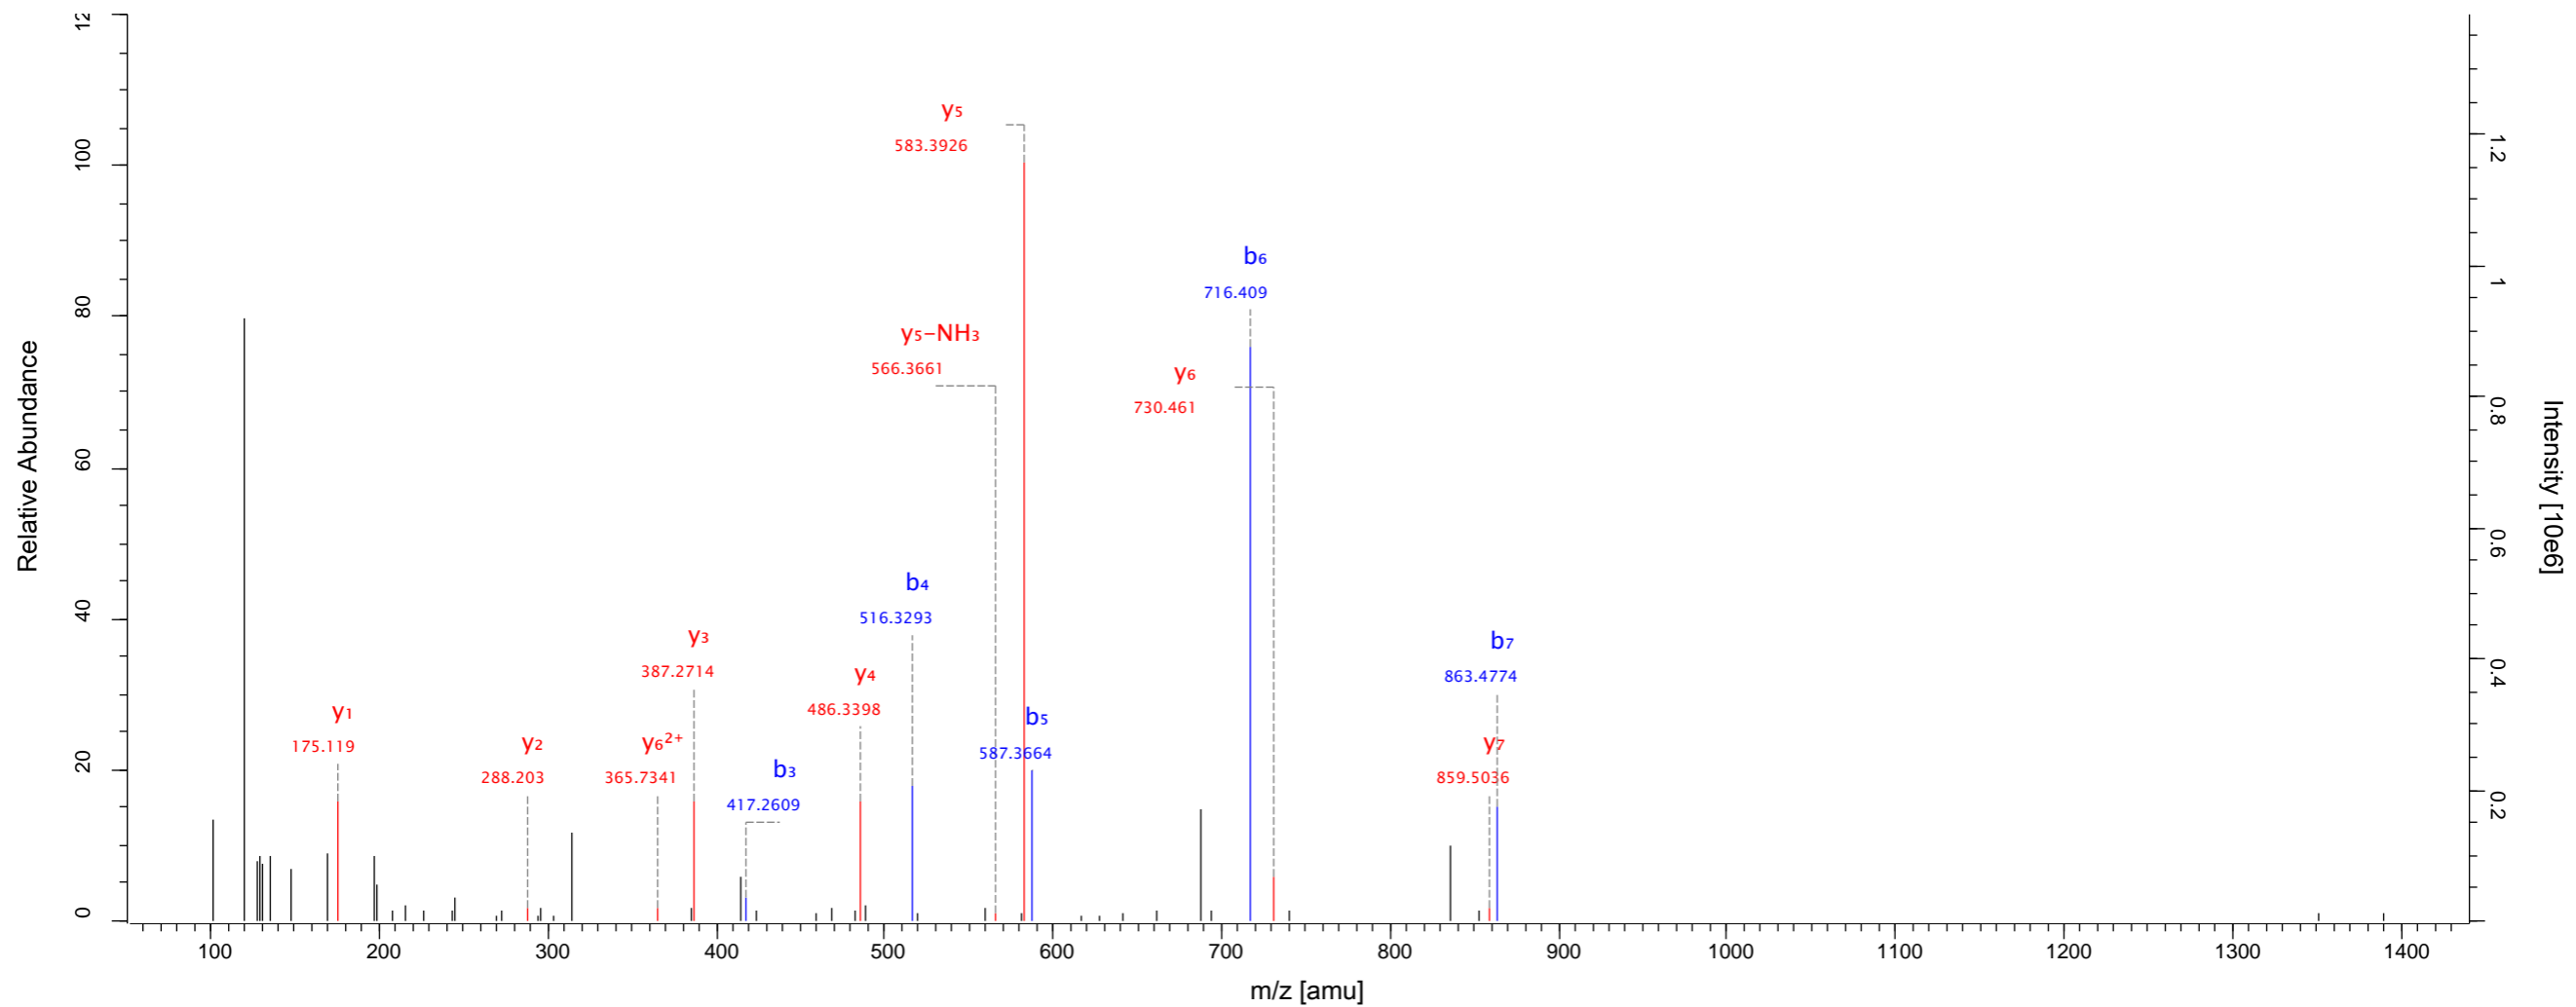

Raw file: 20111212\_EXQ5\_AnMi\_QC\_HCMVp11\_19  
 Scan number: 51974  
 Protein: ORFL234C - NC\_006273.2[148754,149149]- <unknown description>  
 Peptide score: 220.88  
 Method: FTMS; HCD

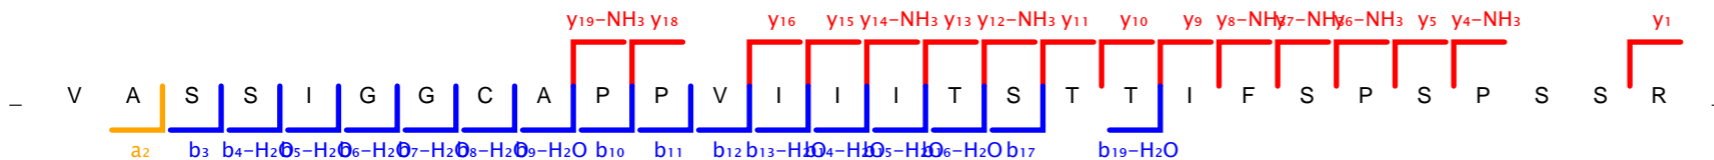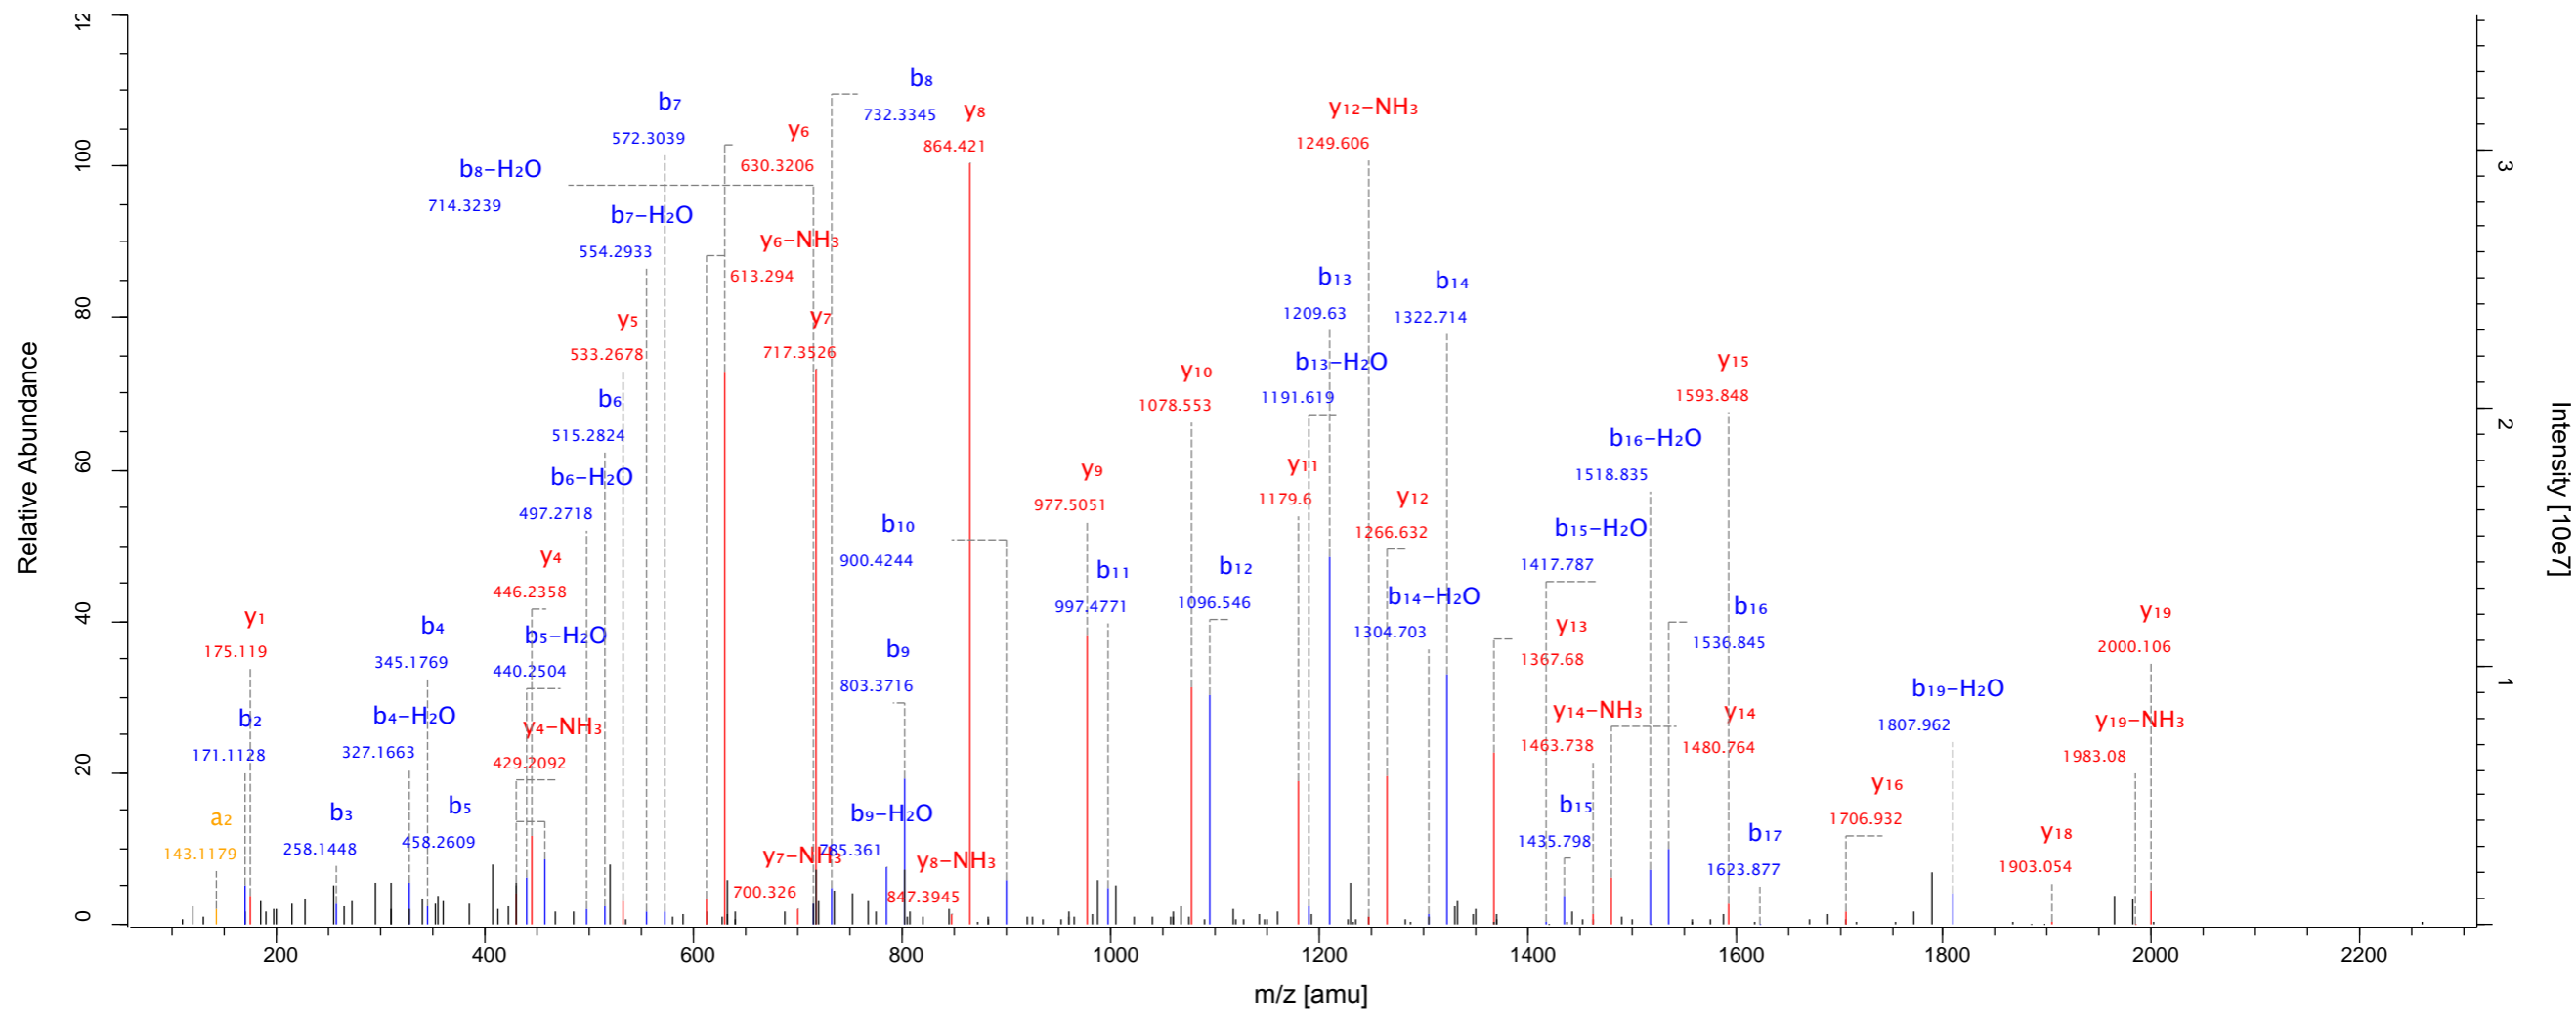

Raw file: 20111212\_EXQ5\_AnMi\_QC\_HCMVp1\_19  
Scan number: 8375  
Protein: ORFL190C - NC\_006273.2[111965,112384]- <unknown description>  
Peptide score: 69.95  
Method: FTMS; HCD

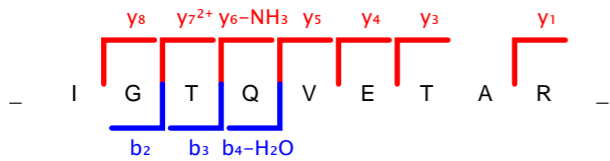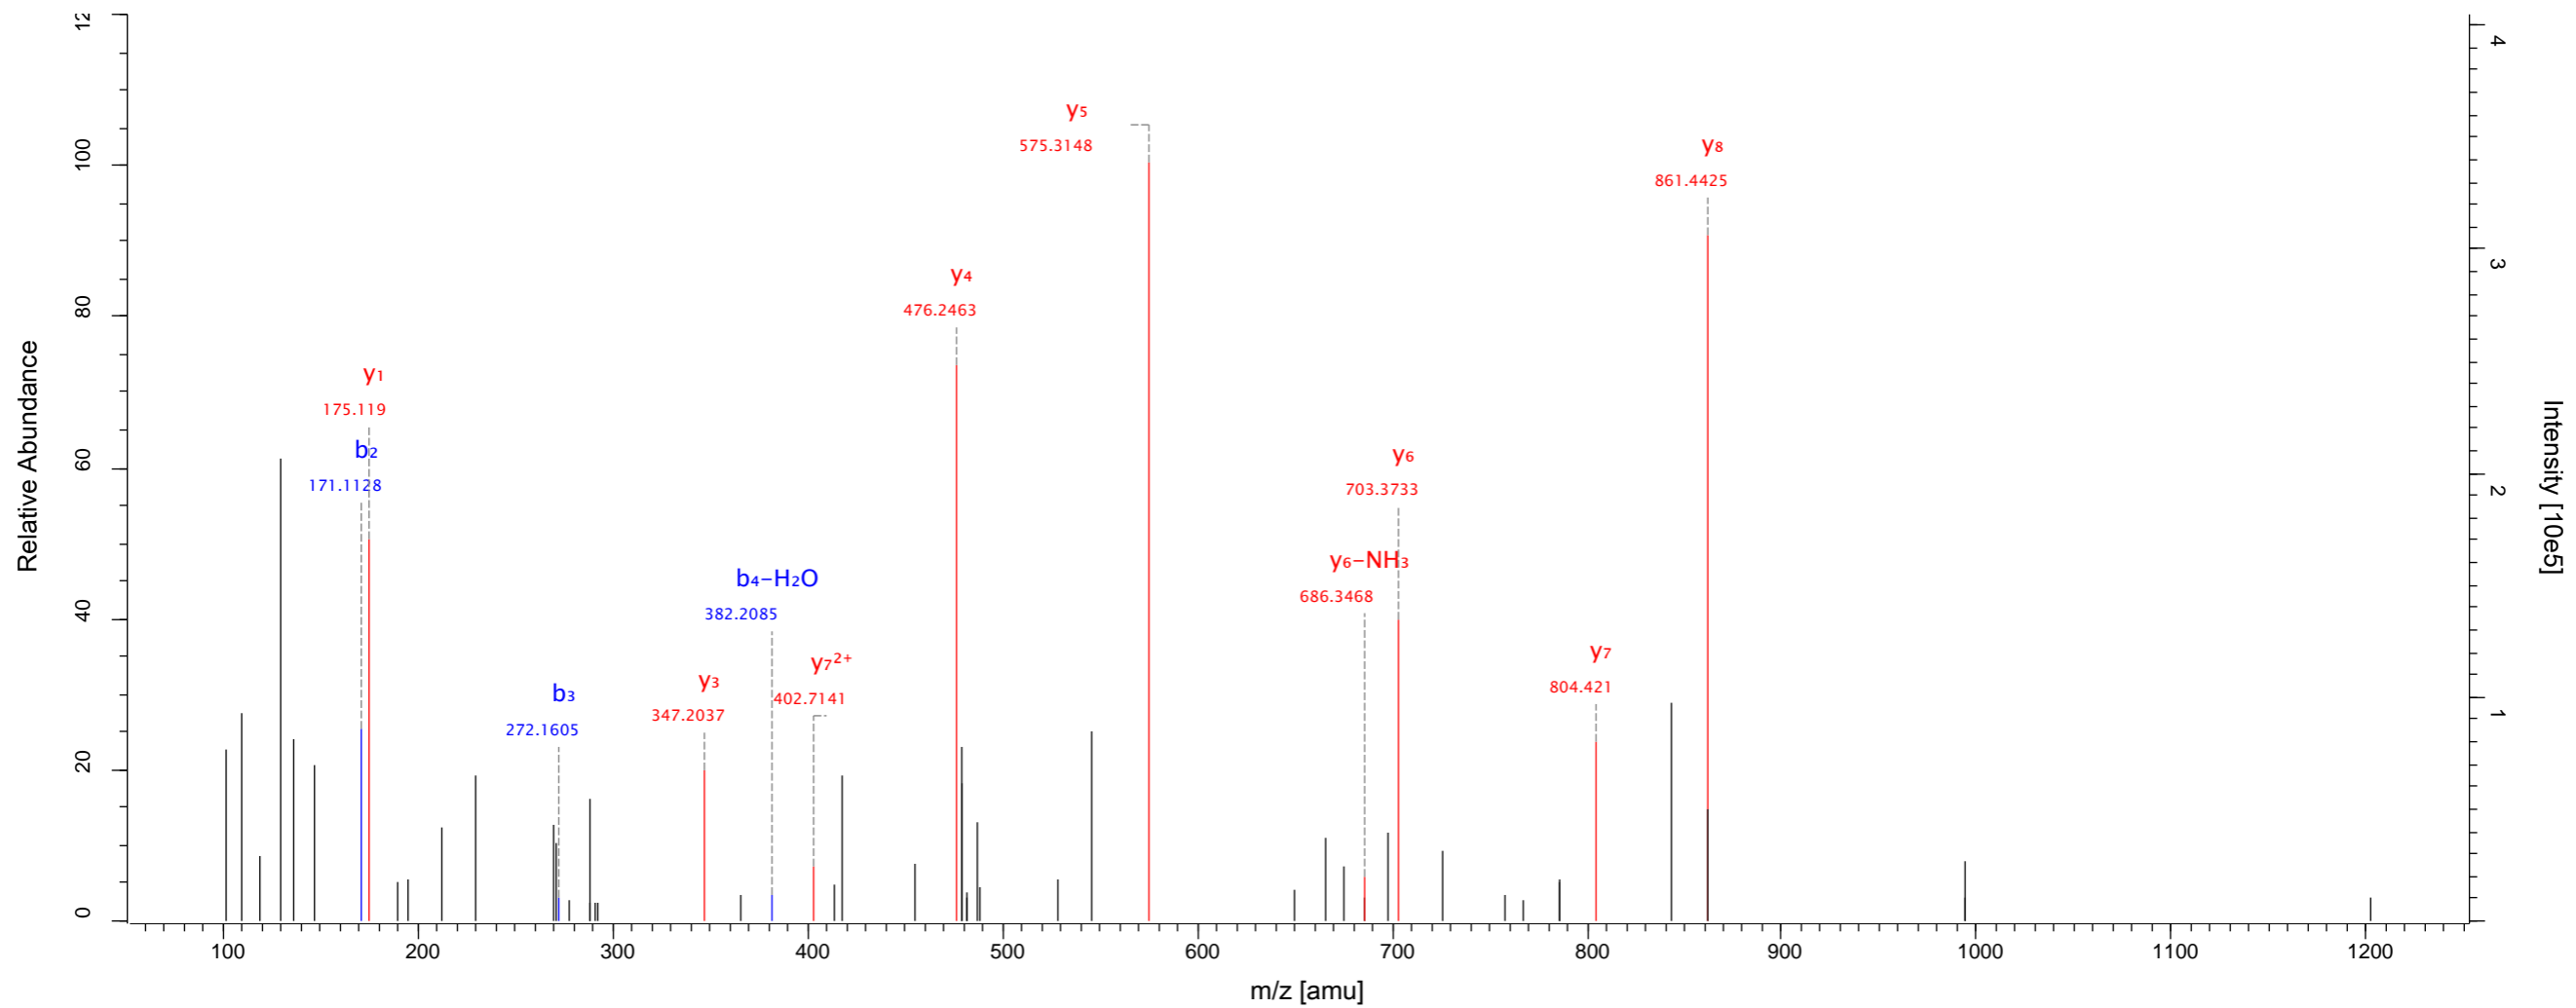

Raw file: 20111212\_EXQ5\_AnMi\_QC\_HCMVp11\_19  
Scan number: 8420  
Protein: ORFL86W + NC\_006273.2[38059,38538]+ <unknown description>  
Peptide score: 50.9  
Method: FTMS; HCD

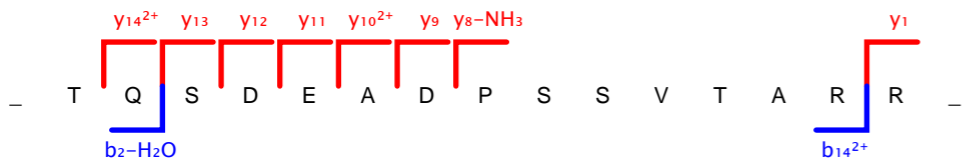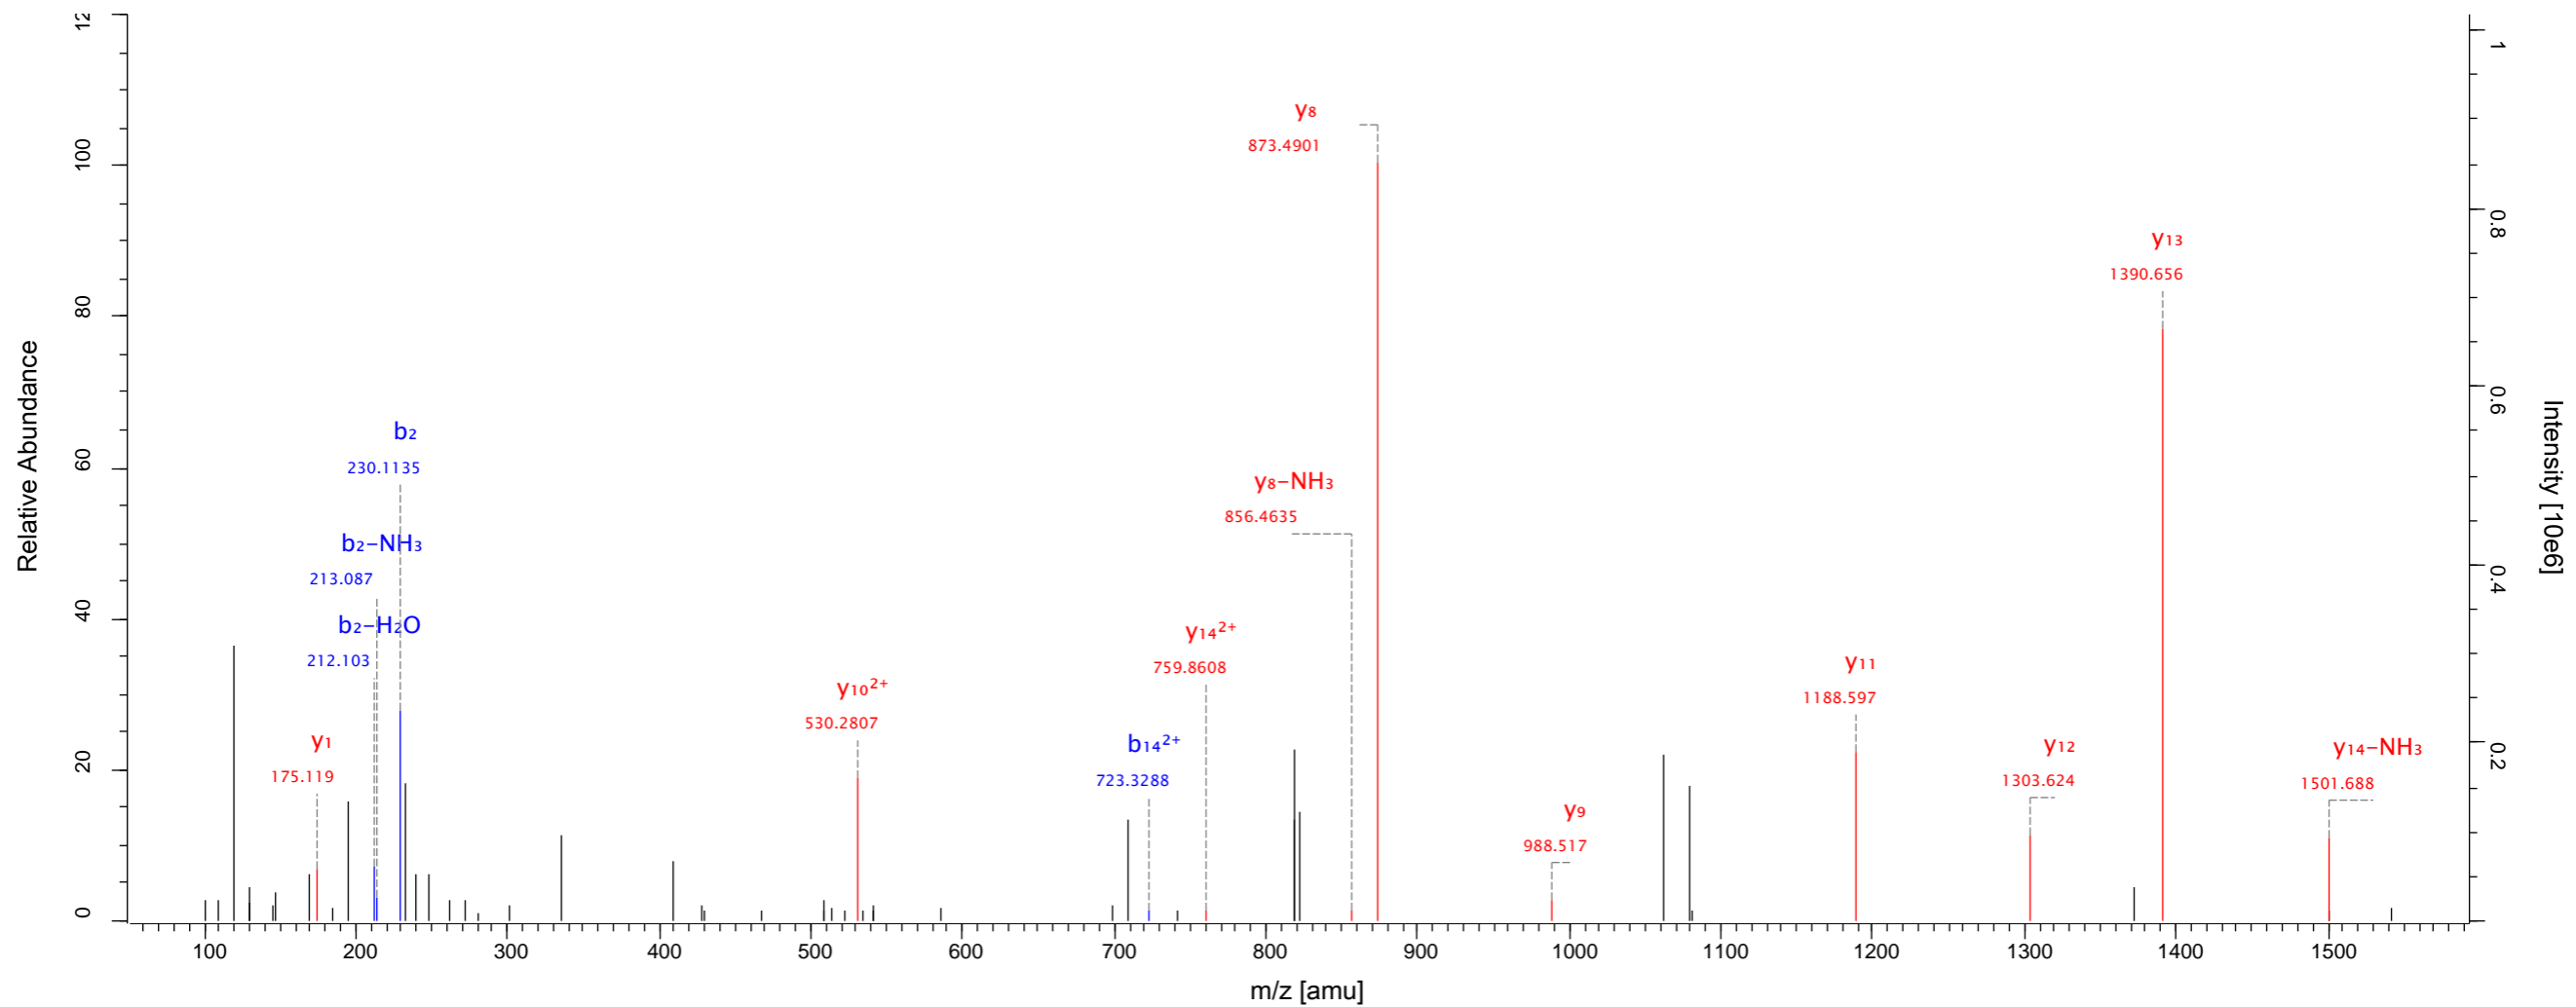

Raw file: 20111212\_EXQ5\_AnMi\_QC\_HCMVp1\_19  
Scan number: 8648  
Protein: ORFL86W + NC\_006273.2[38059,38538]+ <unknown description>  
Peptide score: 117.81  
Method: FTMS; HCD

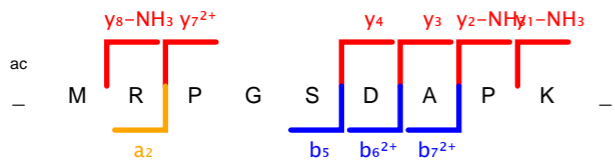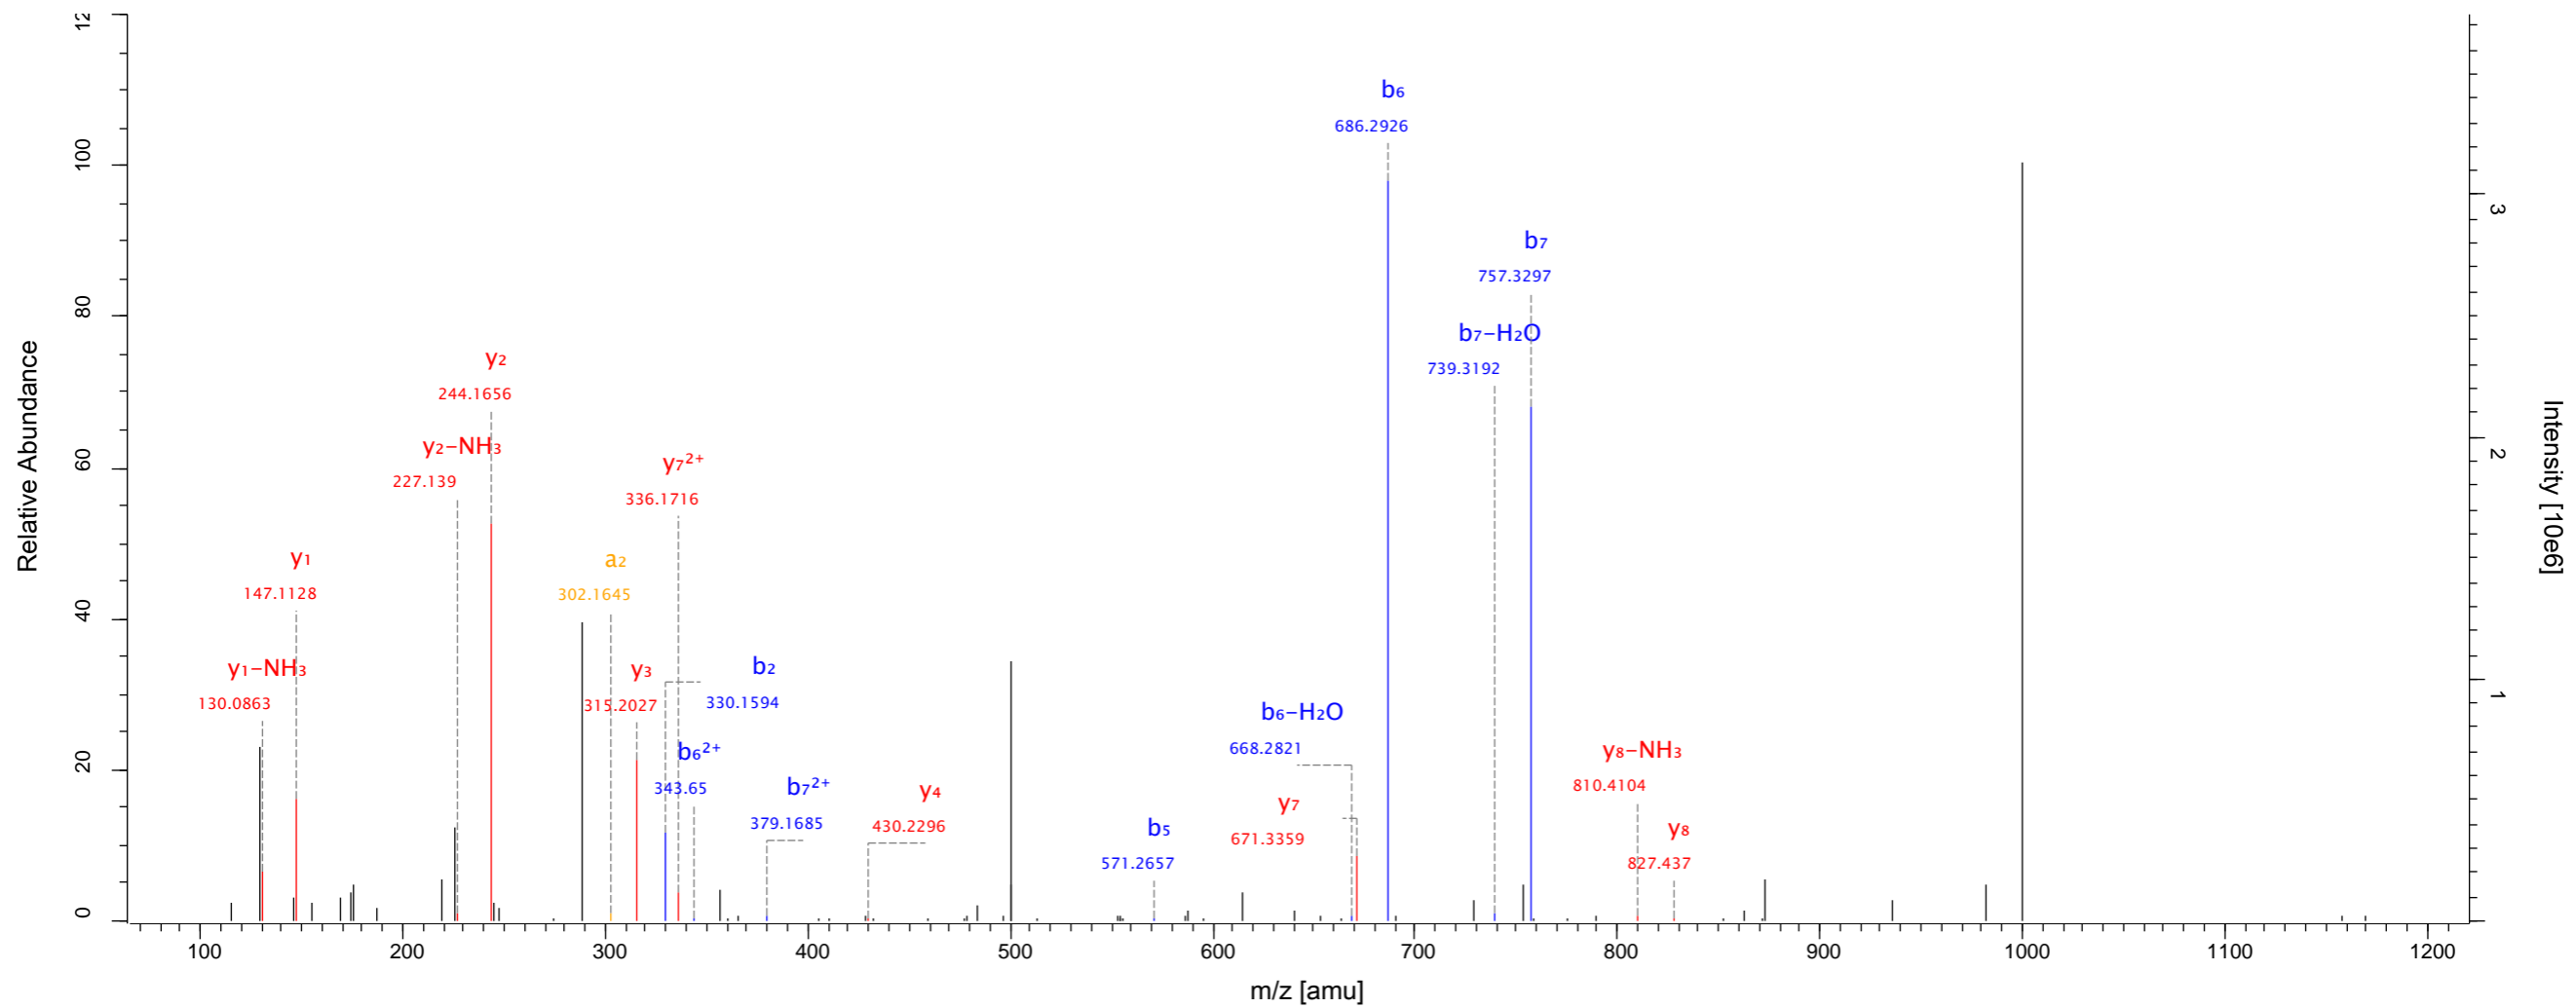

Raw file: 20111212\_EXQ5\_AnMi\_QC\_HCMVp1\_19  
 Scan number: 9070  
 Protein: ORFL86W + NC\_006273.2[38059,38538]+ <unknown description>  
 Peptide score: 179.81  
 Method: FTMS; HCD

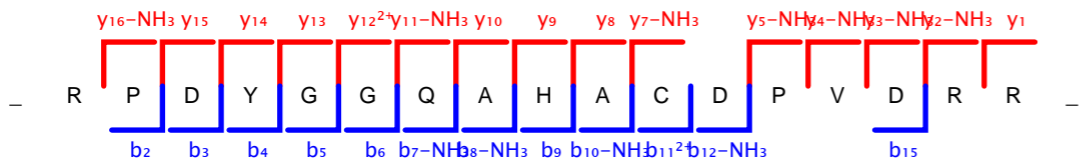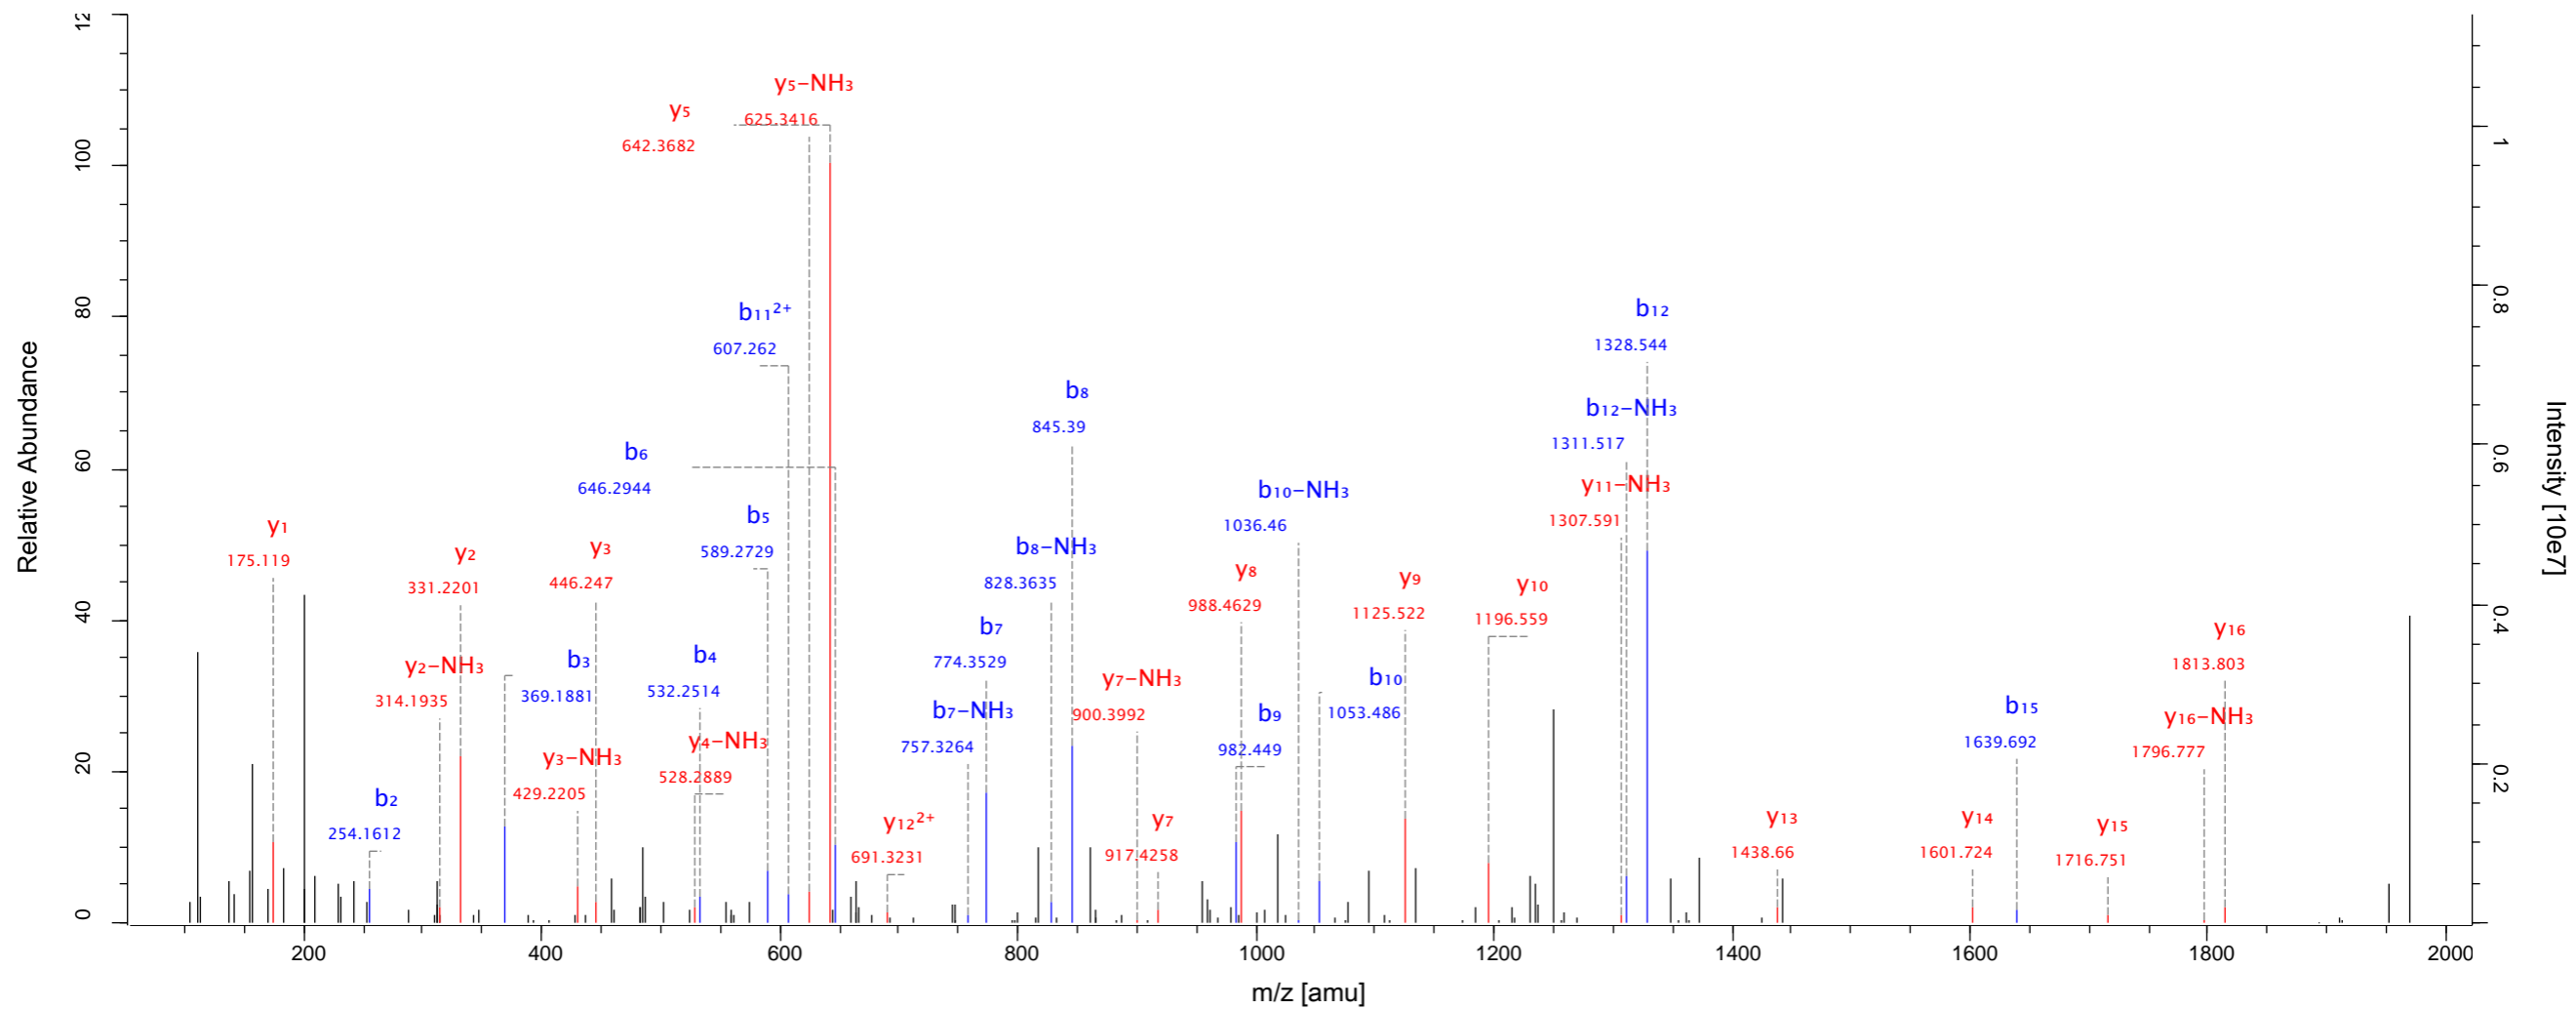

Raw file: 20111212\_EXQ5\_AnMi\_QC\_HCMVp11\_19  
 Scan number: 9862  
 Protein: ORFL86W + NC\_006273.2[38059,38538]+ <unknown description>  
 Peptide score: 185.86  
 Method: FTMS; HCD

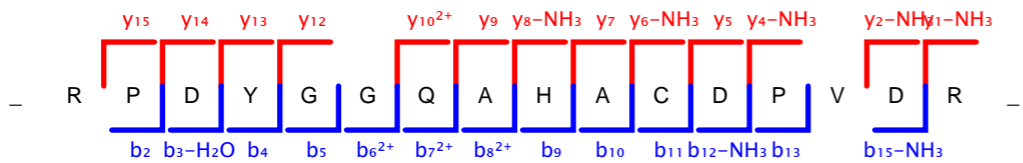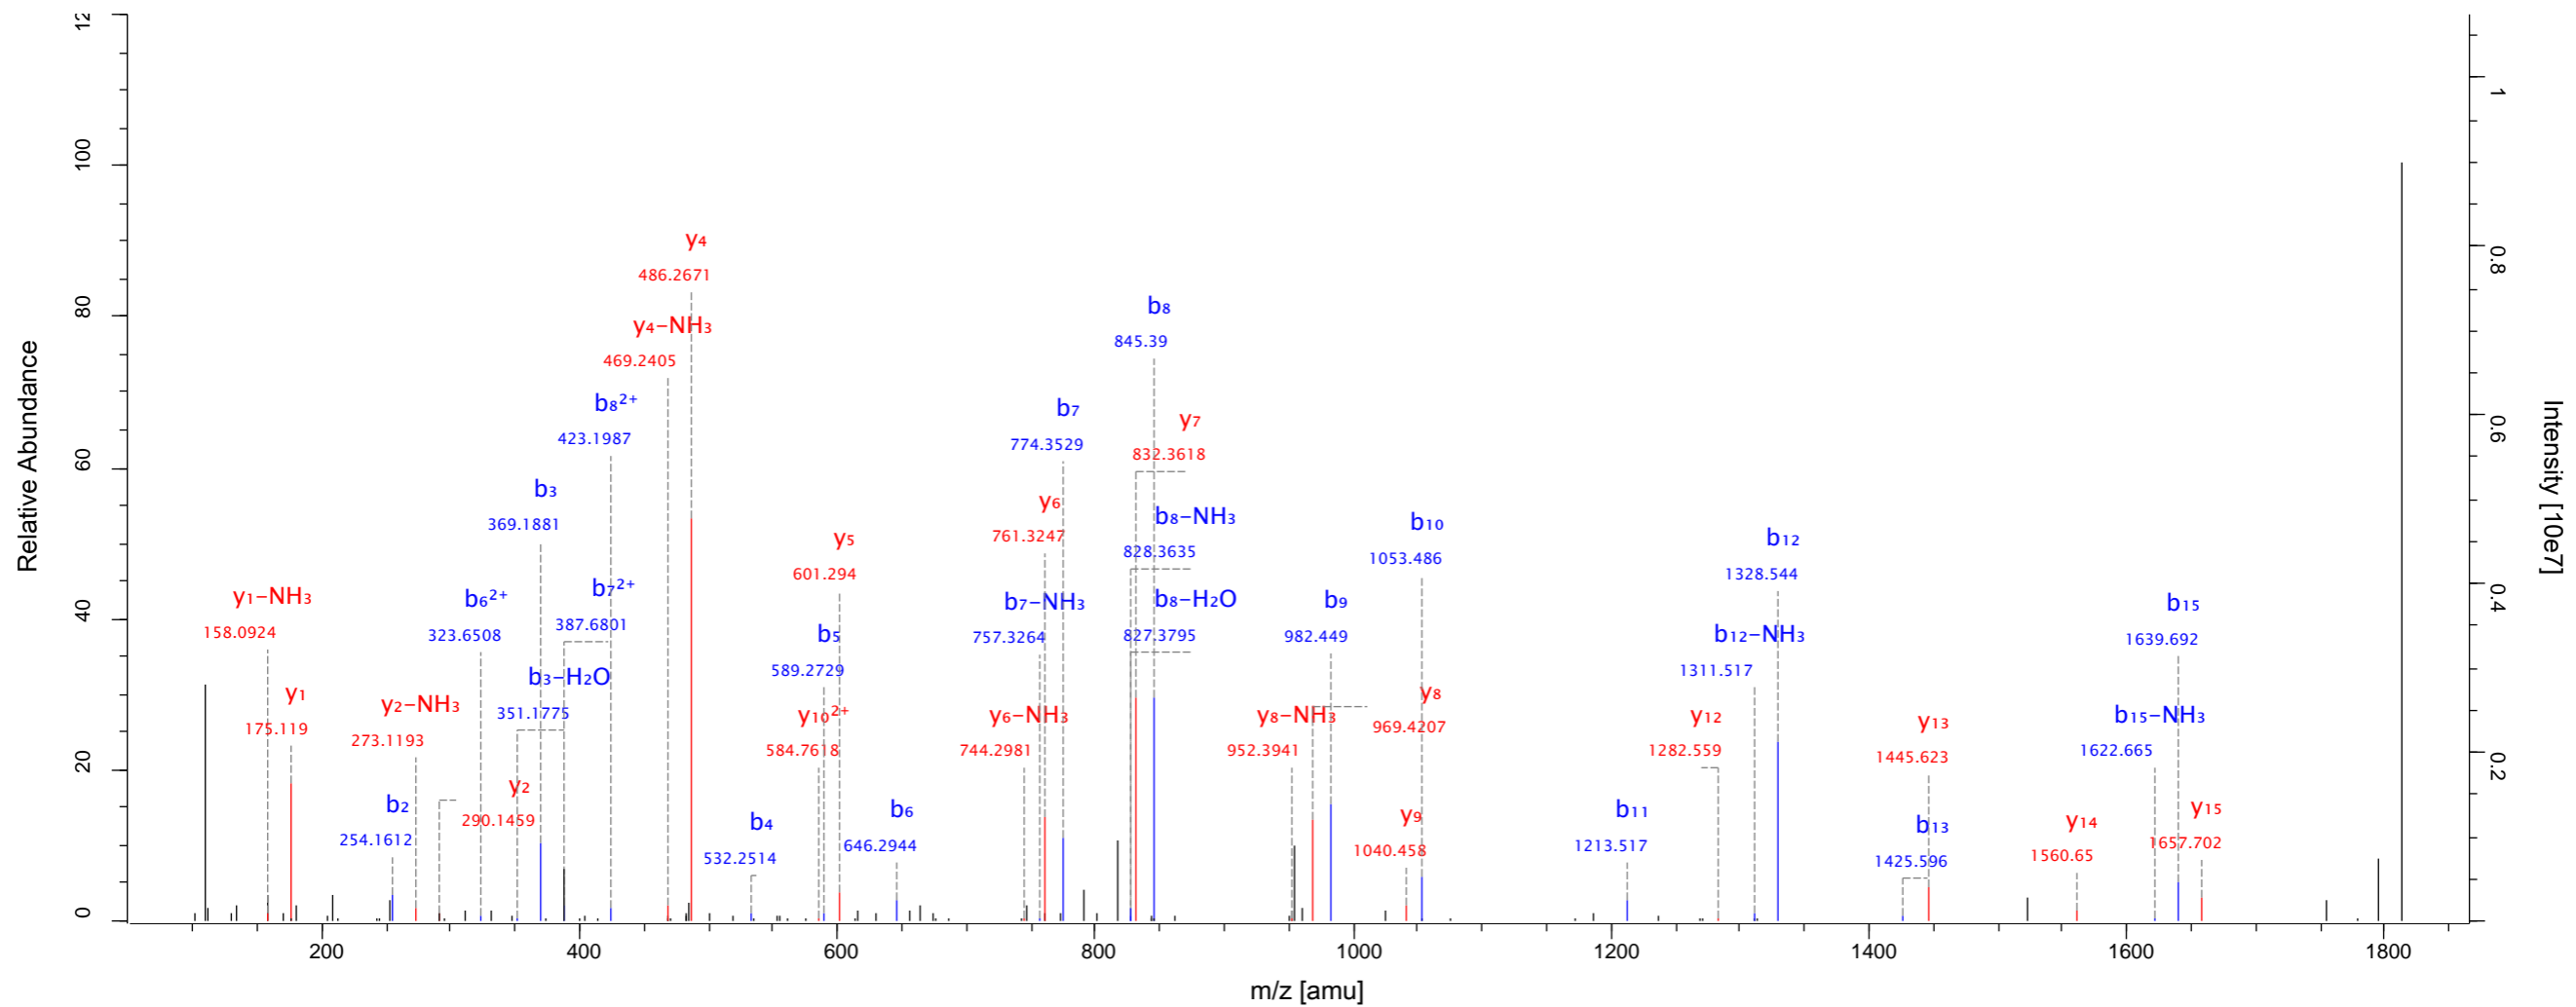

Raw file: 20111212\_EXQ5\_AnMi\_QC\_HCMVp1\_2  
Scan number: 10278  
Protein: ORFL299W + NC\_006273.2[185047,185685]+ <unknown description>  
Peptide score: 103.7  
Method: FTMS; HCD

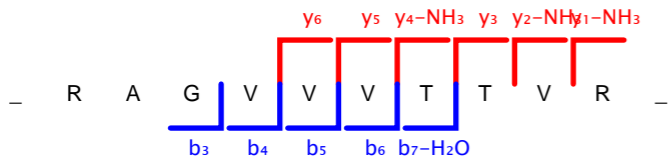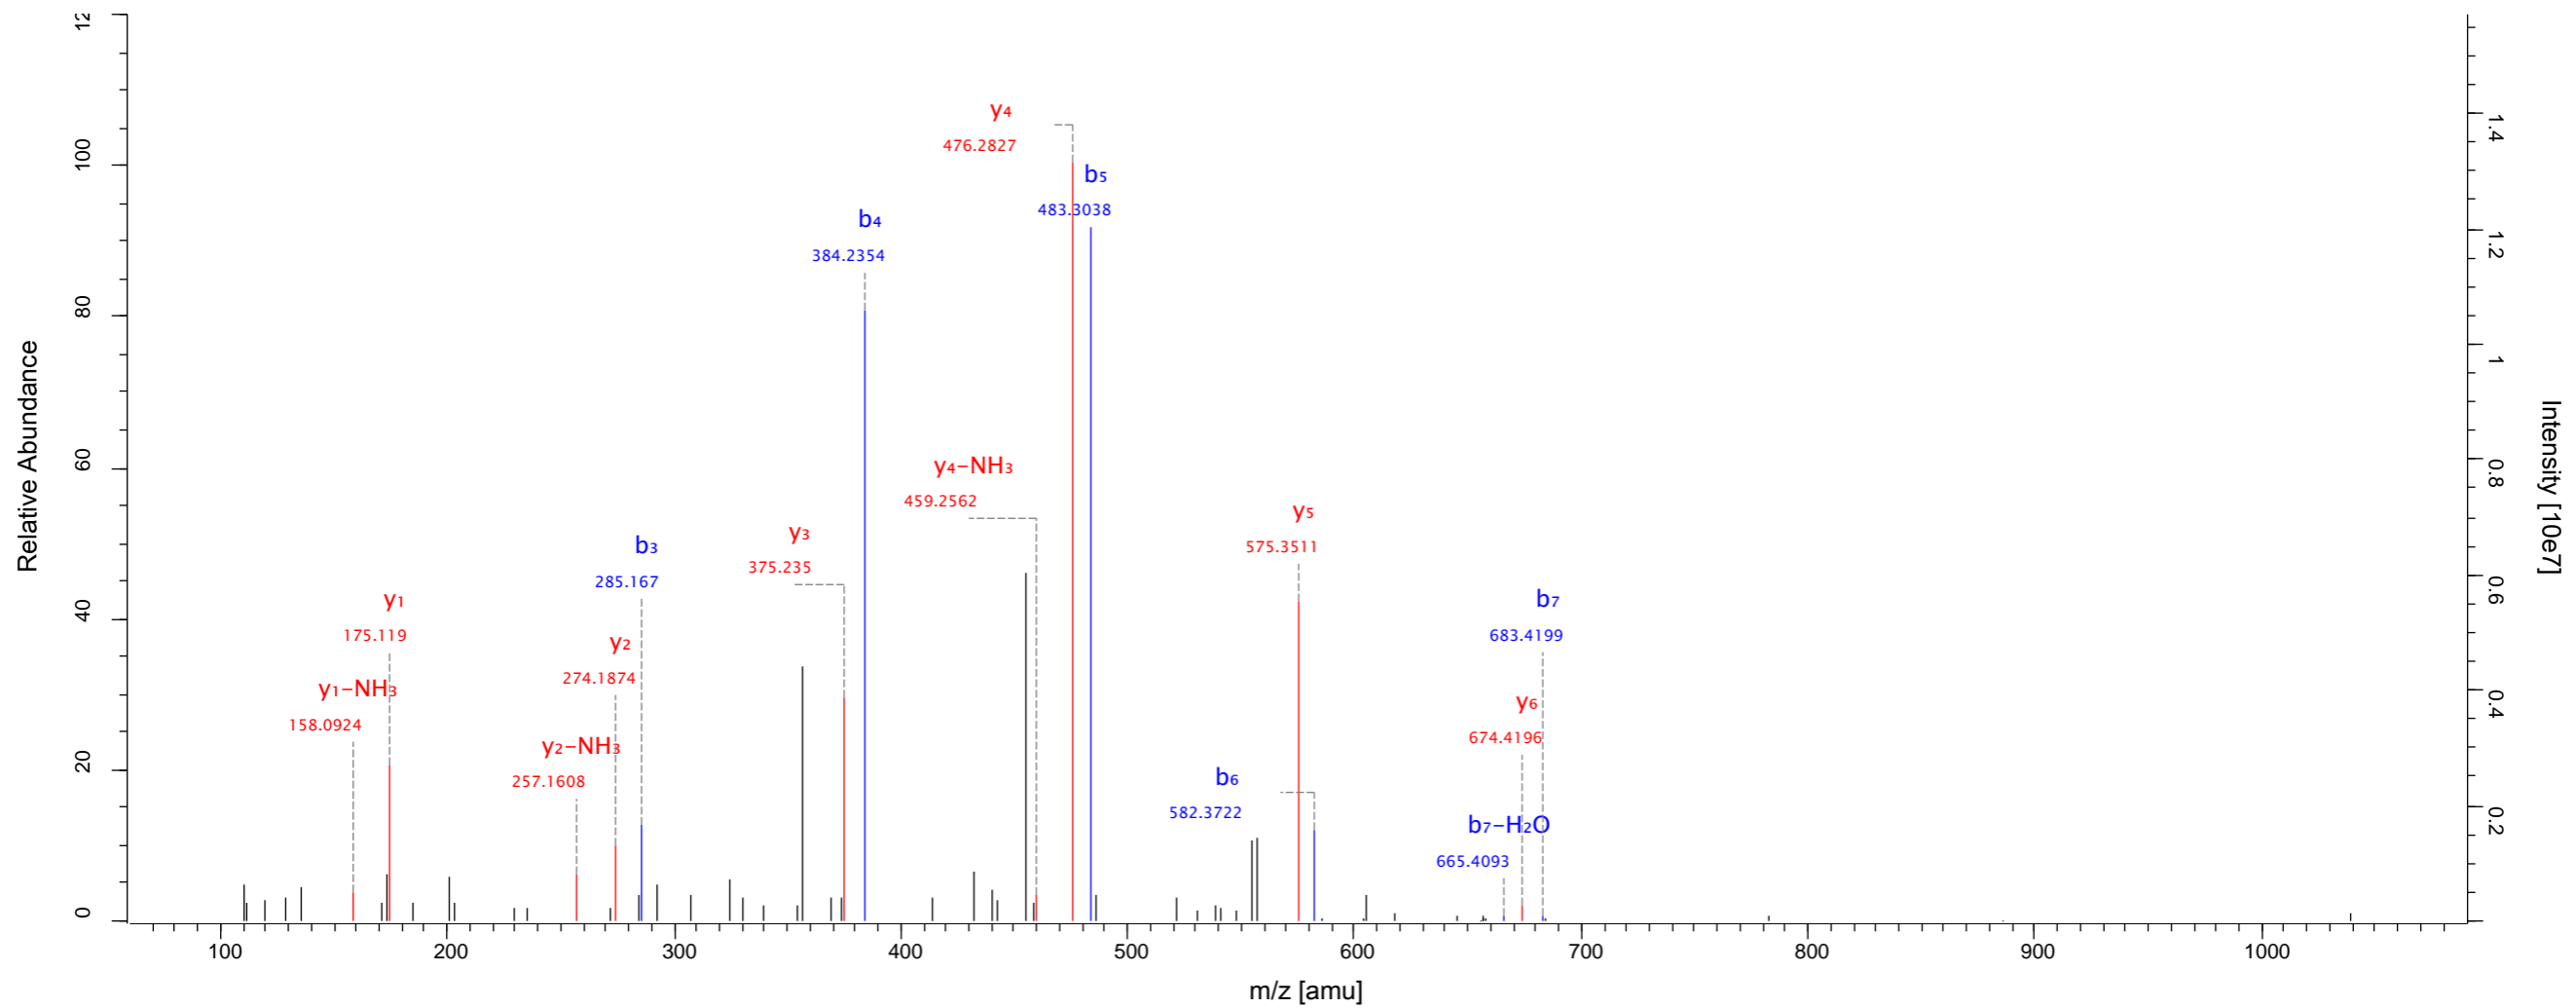



Raw file: 20111212\_EXQ5\_AnMi\_QC\_HCMVp1\_2  
Scan number: 11821  
Protein: ORFL271C.iORF1 - NC\_006273.2[176607,176858]- <unknown description>  
Peptide score: 142.36  
Method: FTMS; HCD

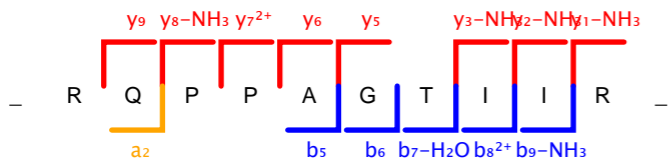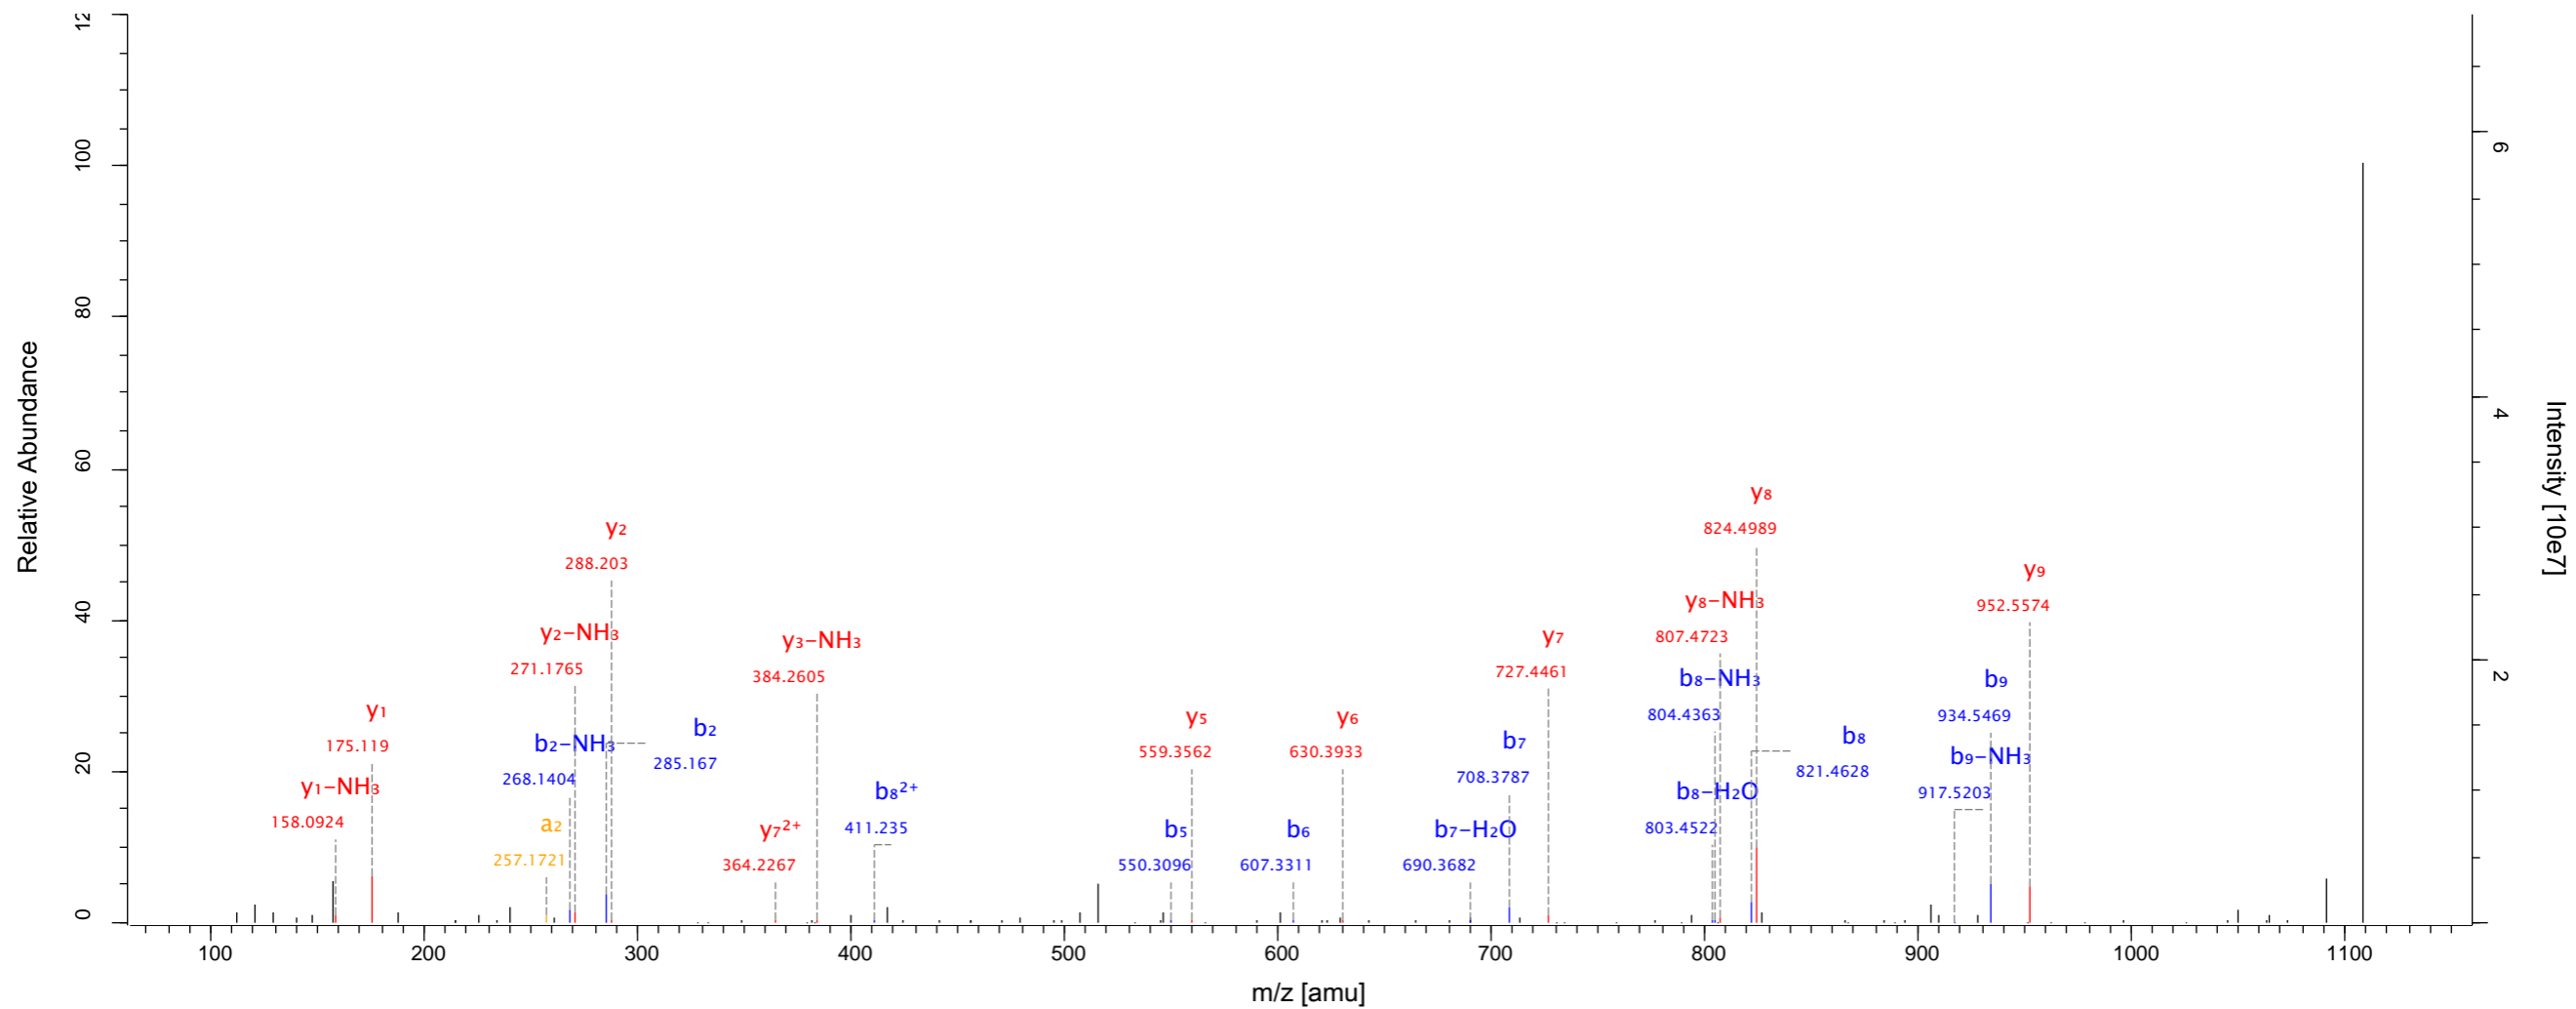

Raw file: 20111212\_EXQ5\_AnMi\_QC\_HCMVp1\_2  
Scan number: 11832  
Protein: ORFL161C.iORF2 - NC\_006273.2[101063,101479]- <unknown description>  
Peptide score: 99.38  
Method: FTMS; HCD

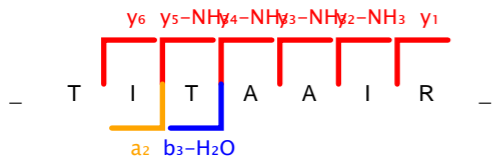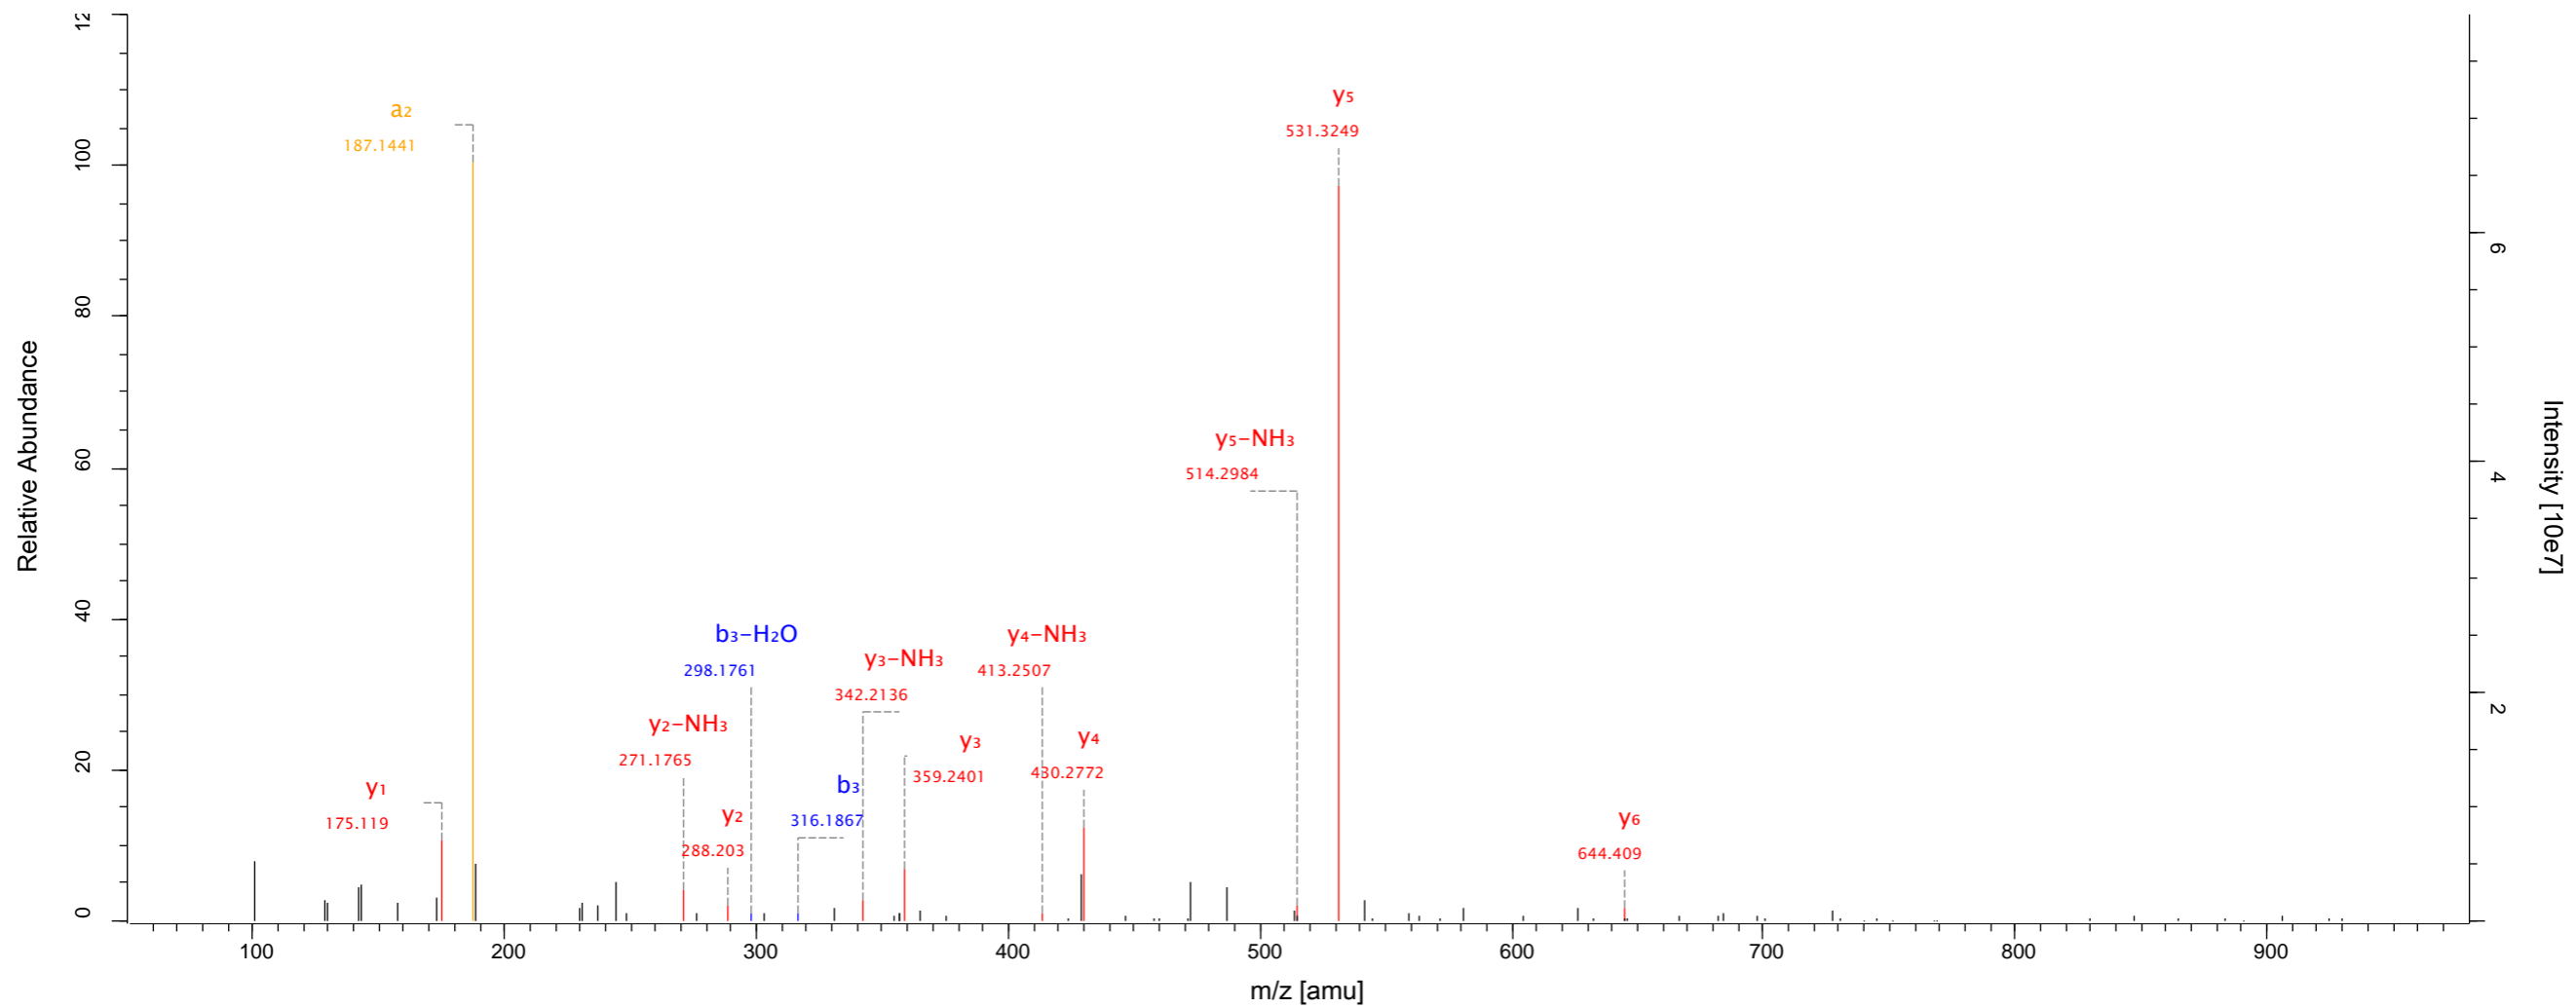

Raw file: 20111212\_EXQ5\_AnMi\_QC\_HCMVp1\_2  
Scan number: 12102  
Protein: ORFL174C.iORF1 - NC\_006273.2[106302,106568]- <unknown description>  
Peptide score: 132.32  
Method: FTMS; HCD

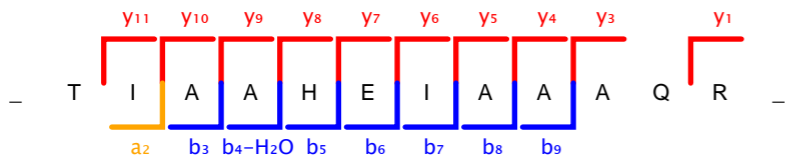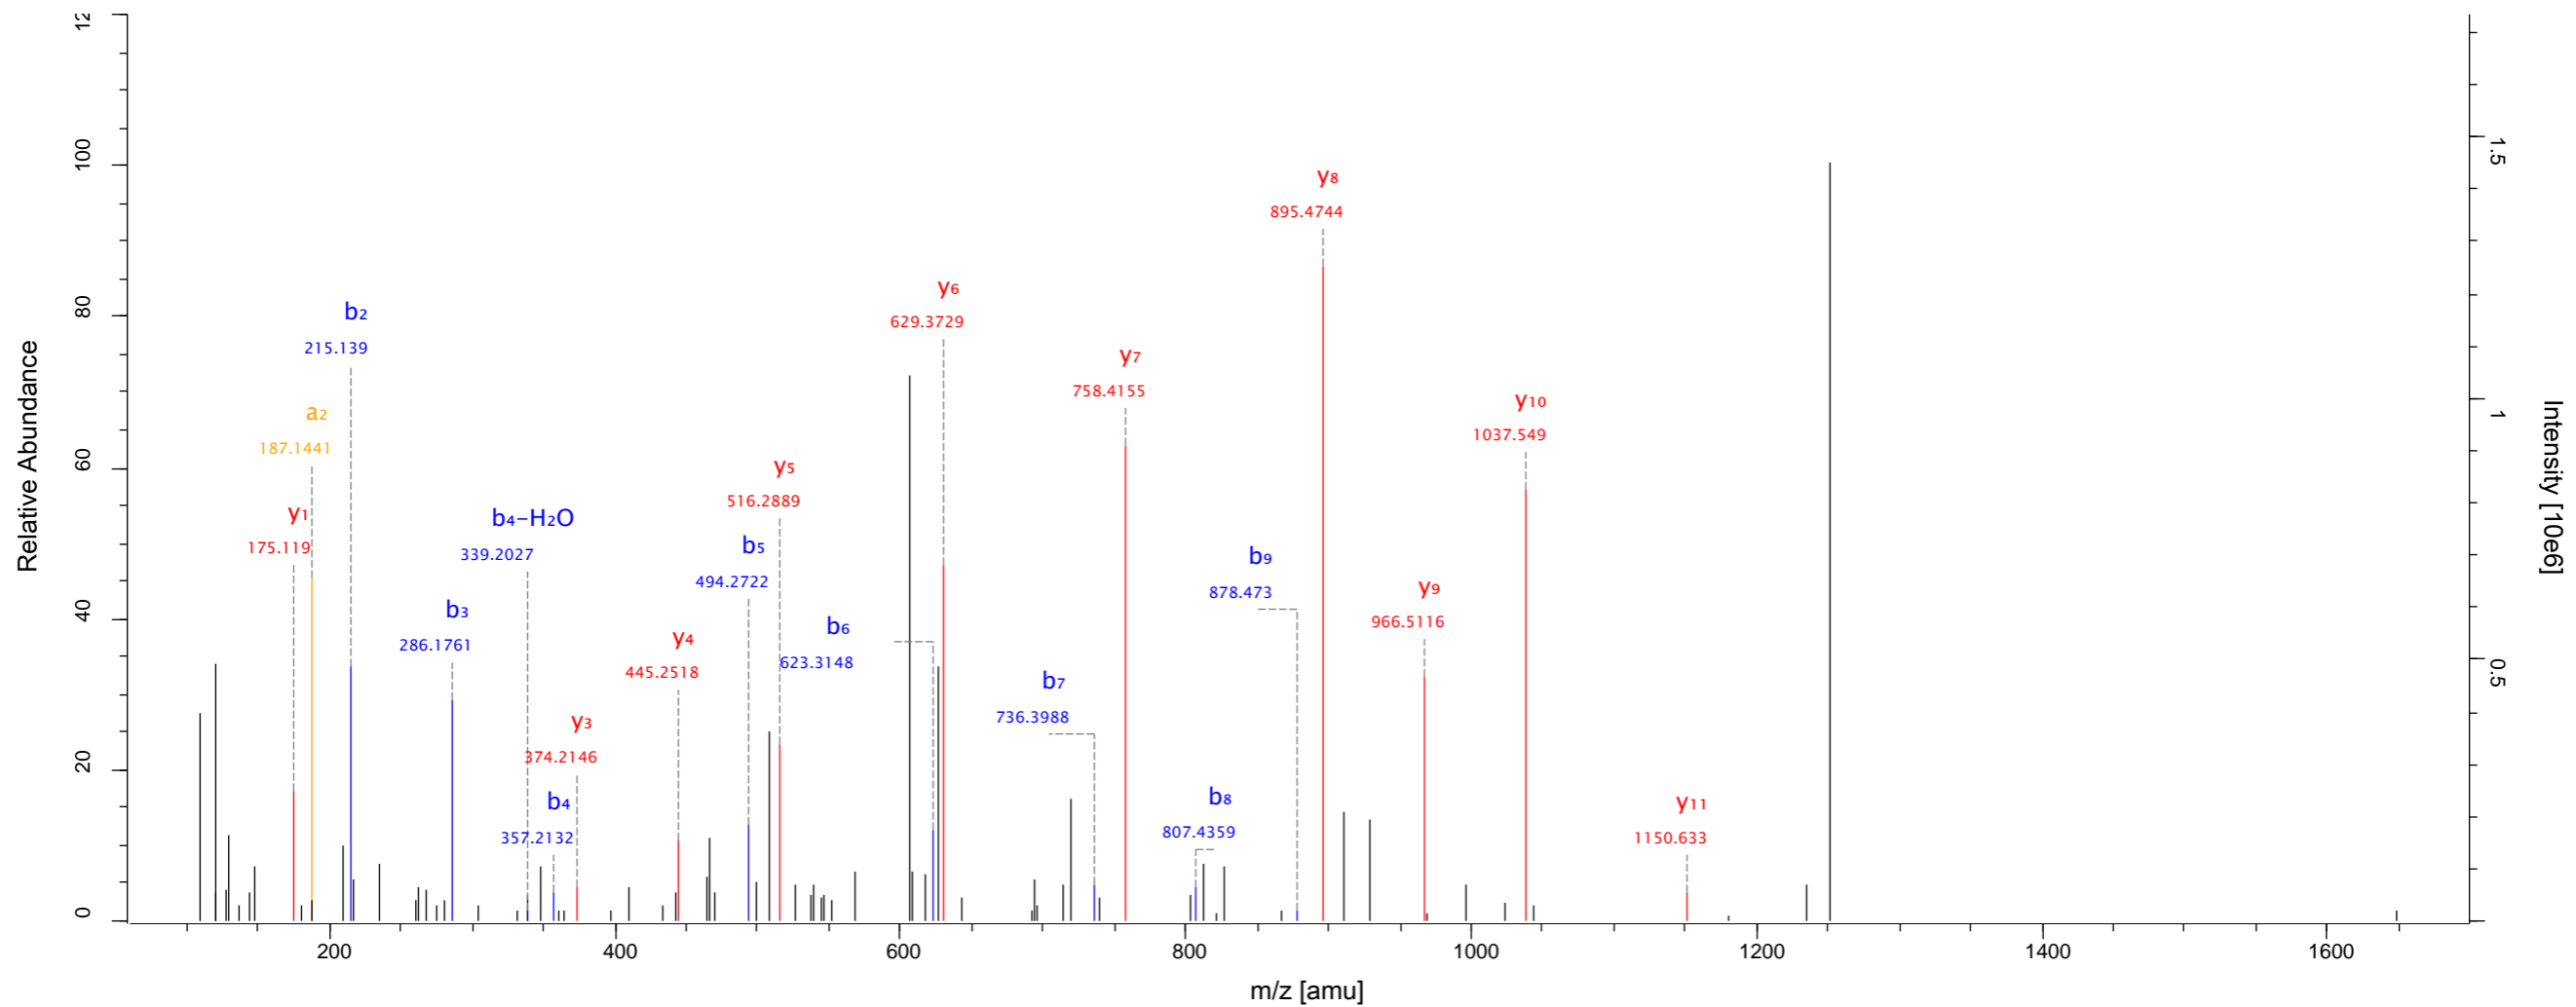

Raw file: 20111212\_EXQ5\_AnMi\_QC\_HCMVp1\_2  
Scan number: 13098  
Protein: ORFL185C - NC\_006273.2[111134,111490]- <unknown description>; ORFL184C.iORF3 - NC\_006273.2[111134,111379]- <unknown description>  
Peptide score: 148.14  
Method: FTMS; HCD

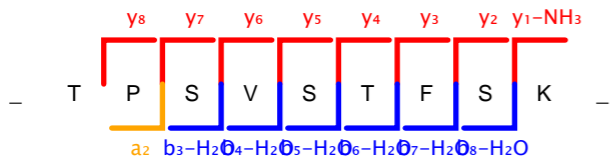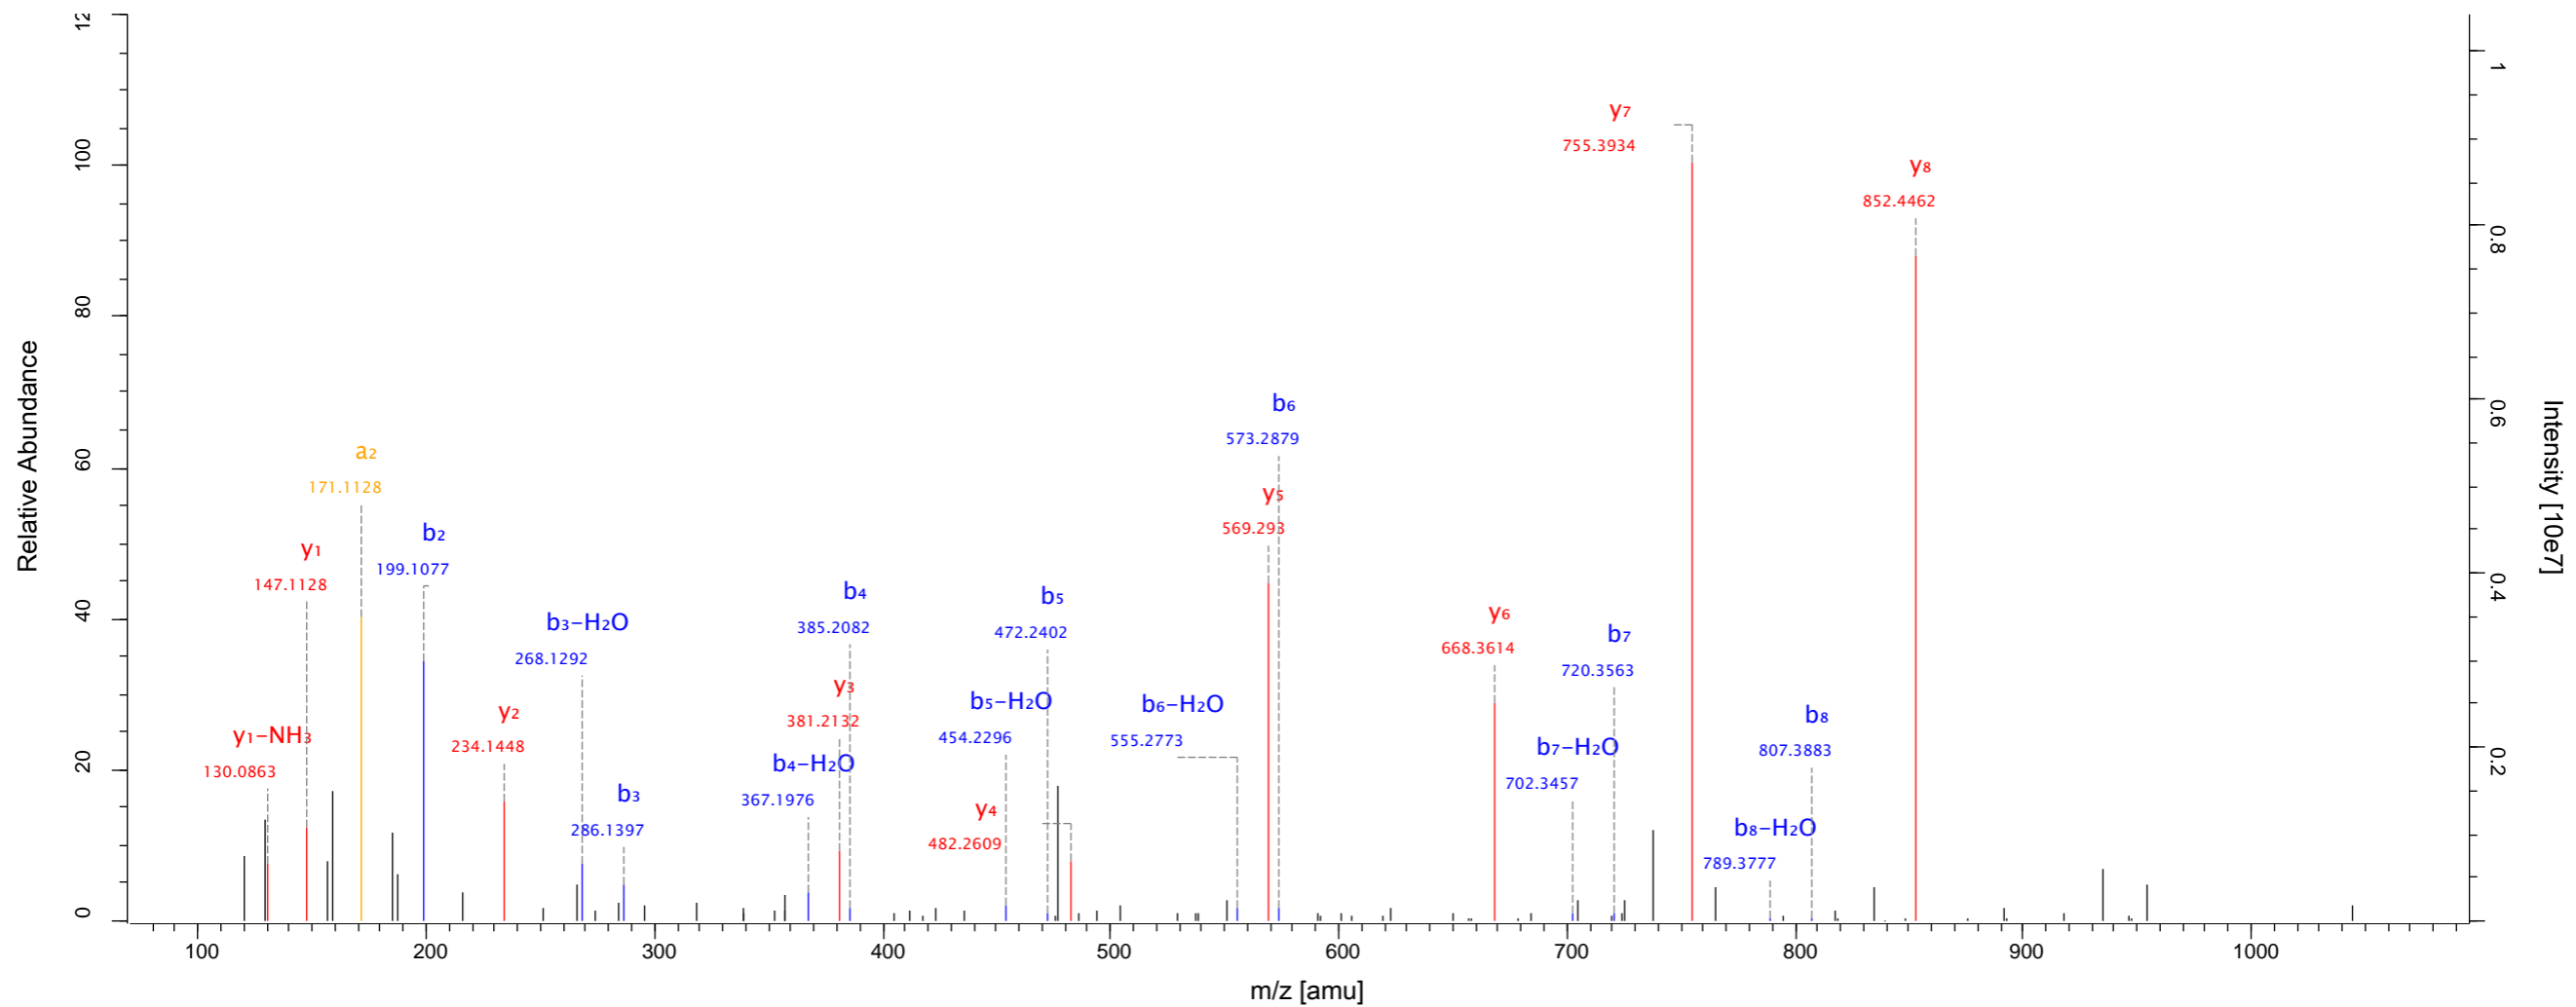

Raw file: 20111212\_EXQ5\_AnMi\_QC\_HCMVp1\_2  
Scan number: 14619  
Protein: ORFL47W.iORF1 + NC\_006273.2[21305,21601]+ <unknown description>  
Peptide score: 59.8  
Method: FTMS; HCD

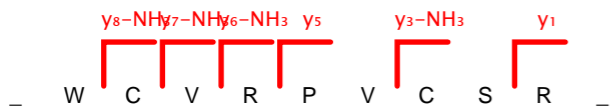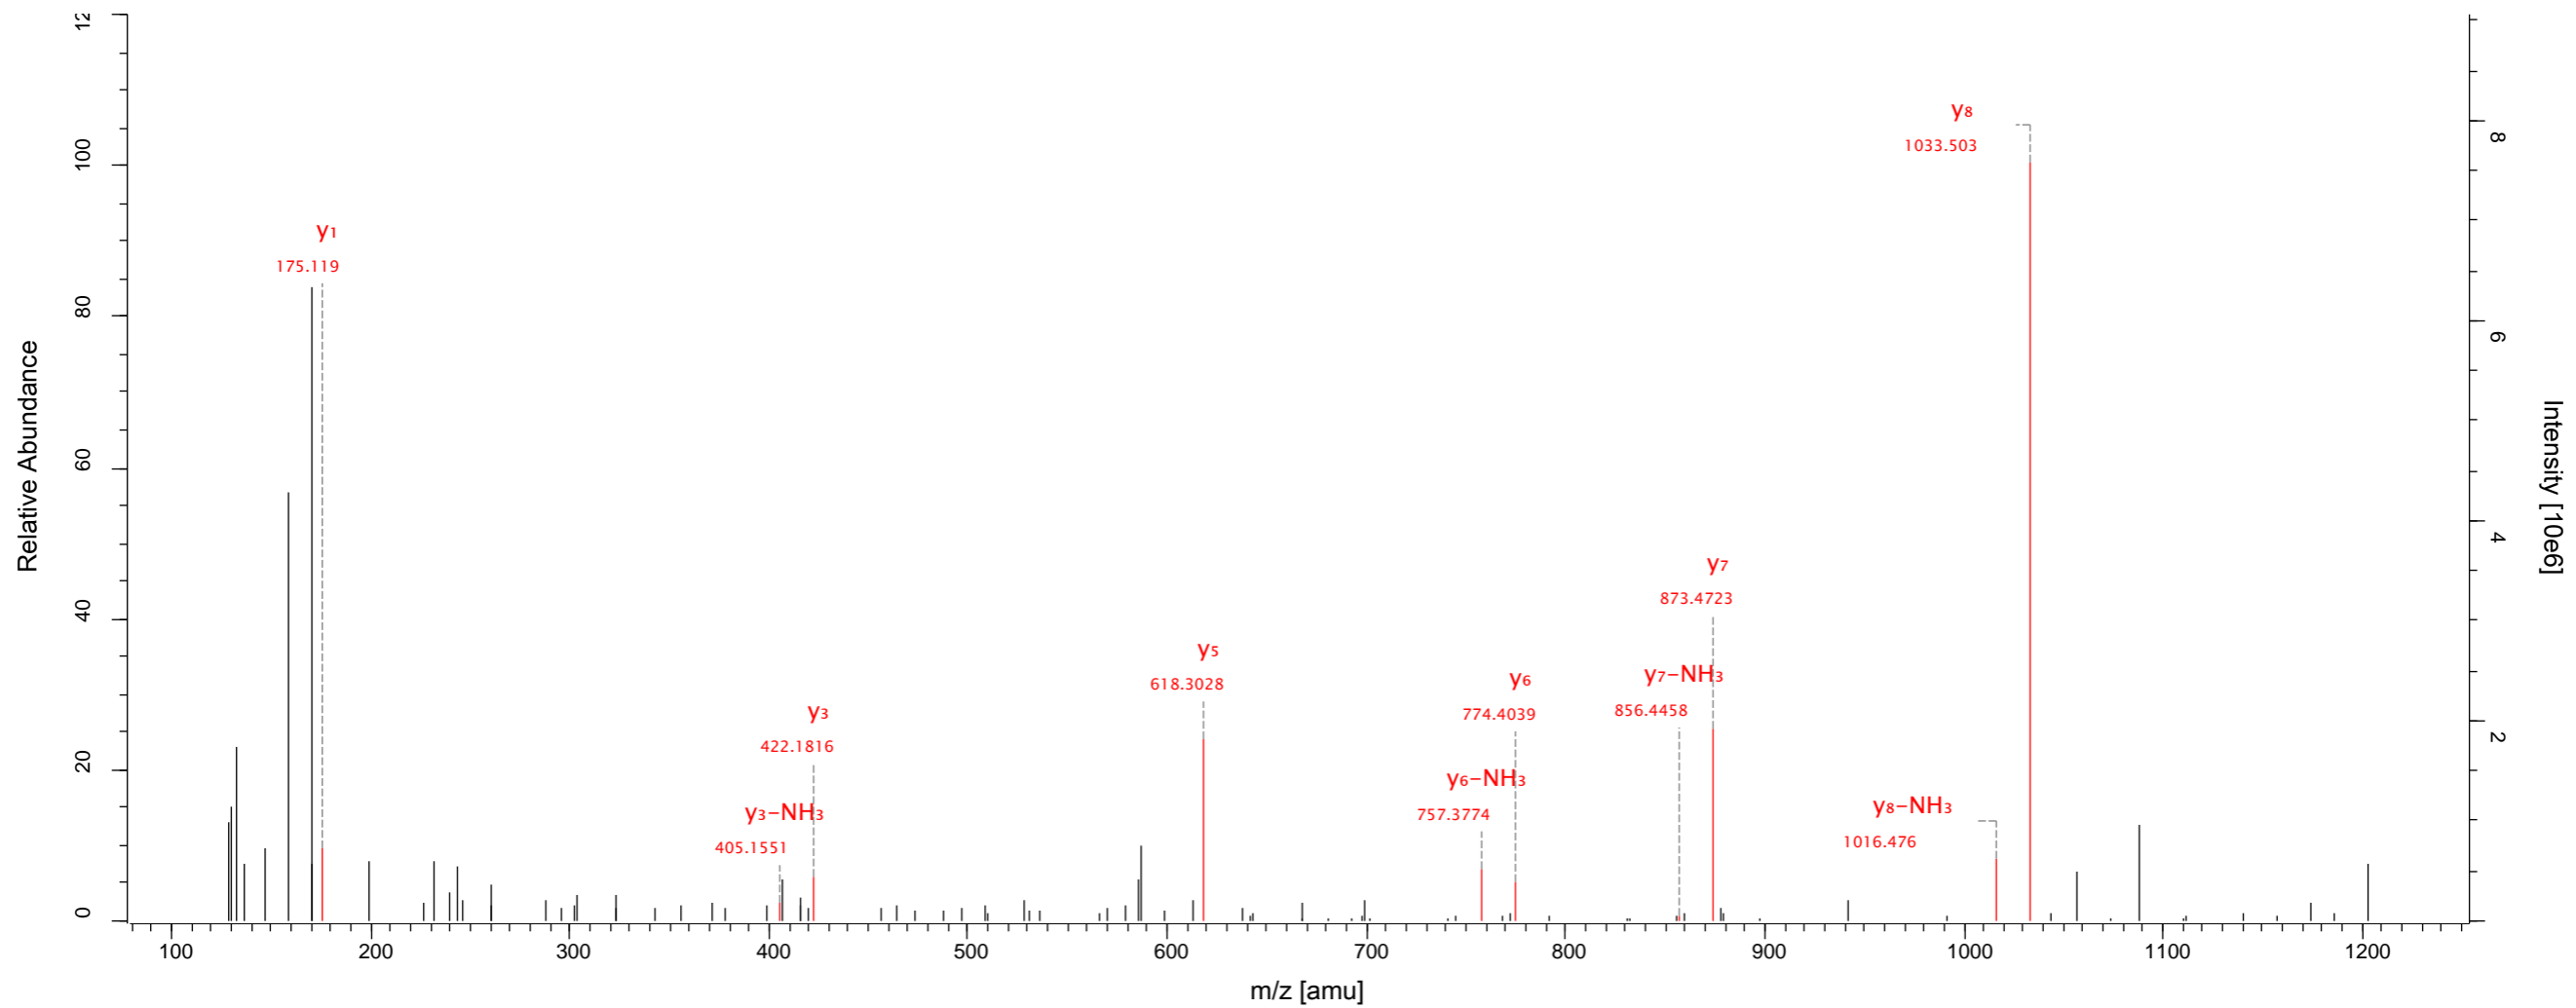

Raw file: 20111212\_EXQ5\_AnMi\_QC\_HCMVp1\_2  
Scan number: 16027  
Protein: ORFS343C.iORF1 - NC\_006273.2[210869,211213]- <unknown description>  
Peptide score: 80.24  
Method: FTMS; HCD

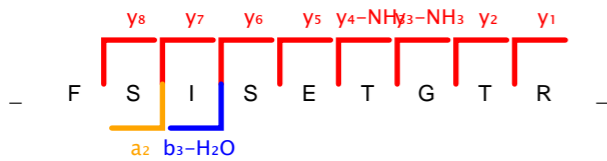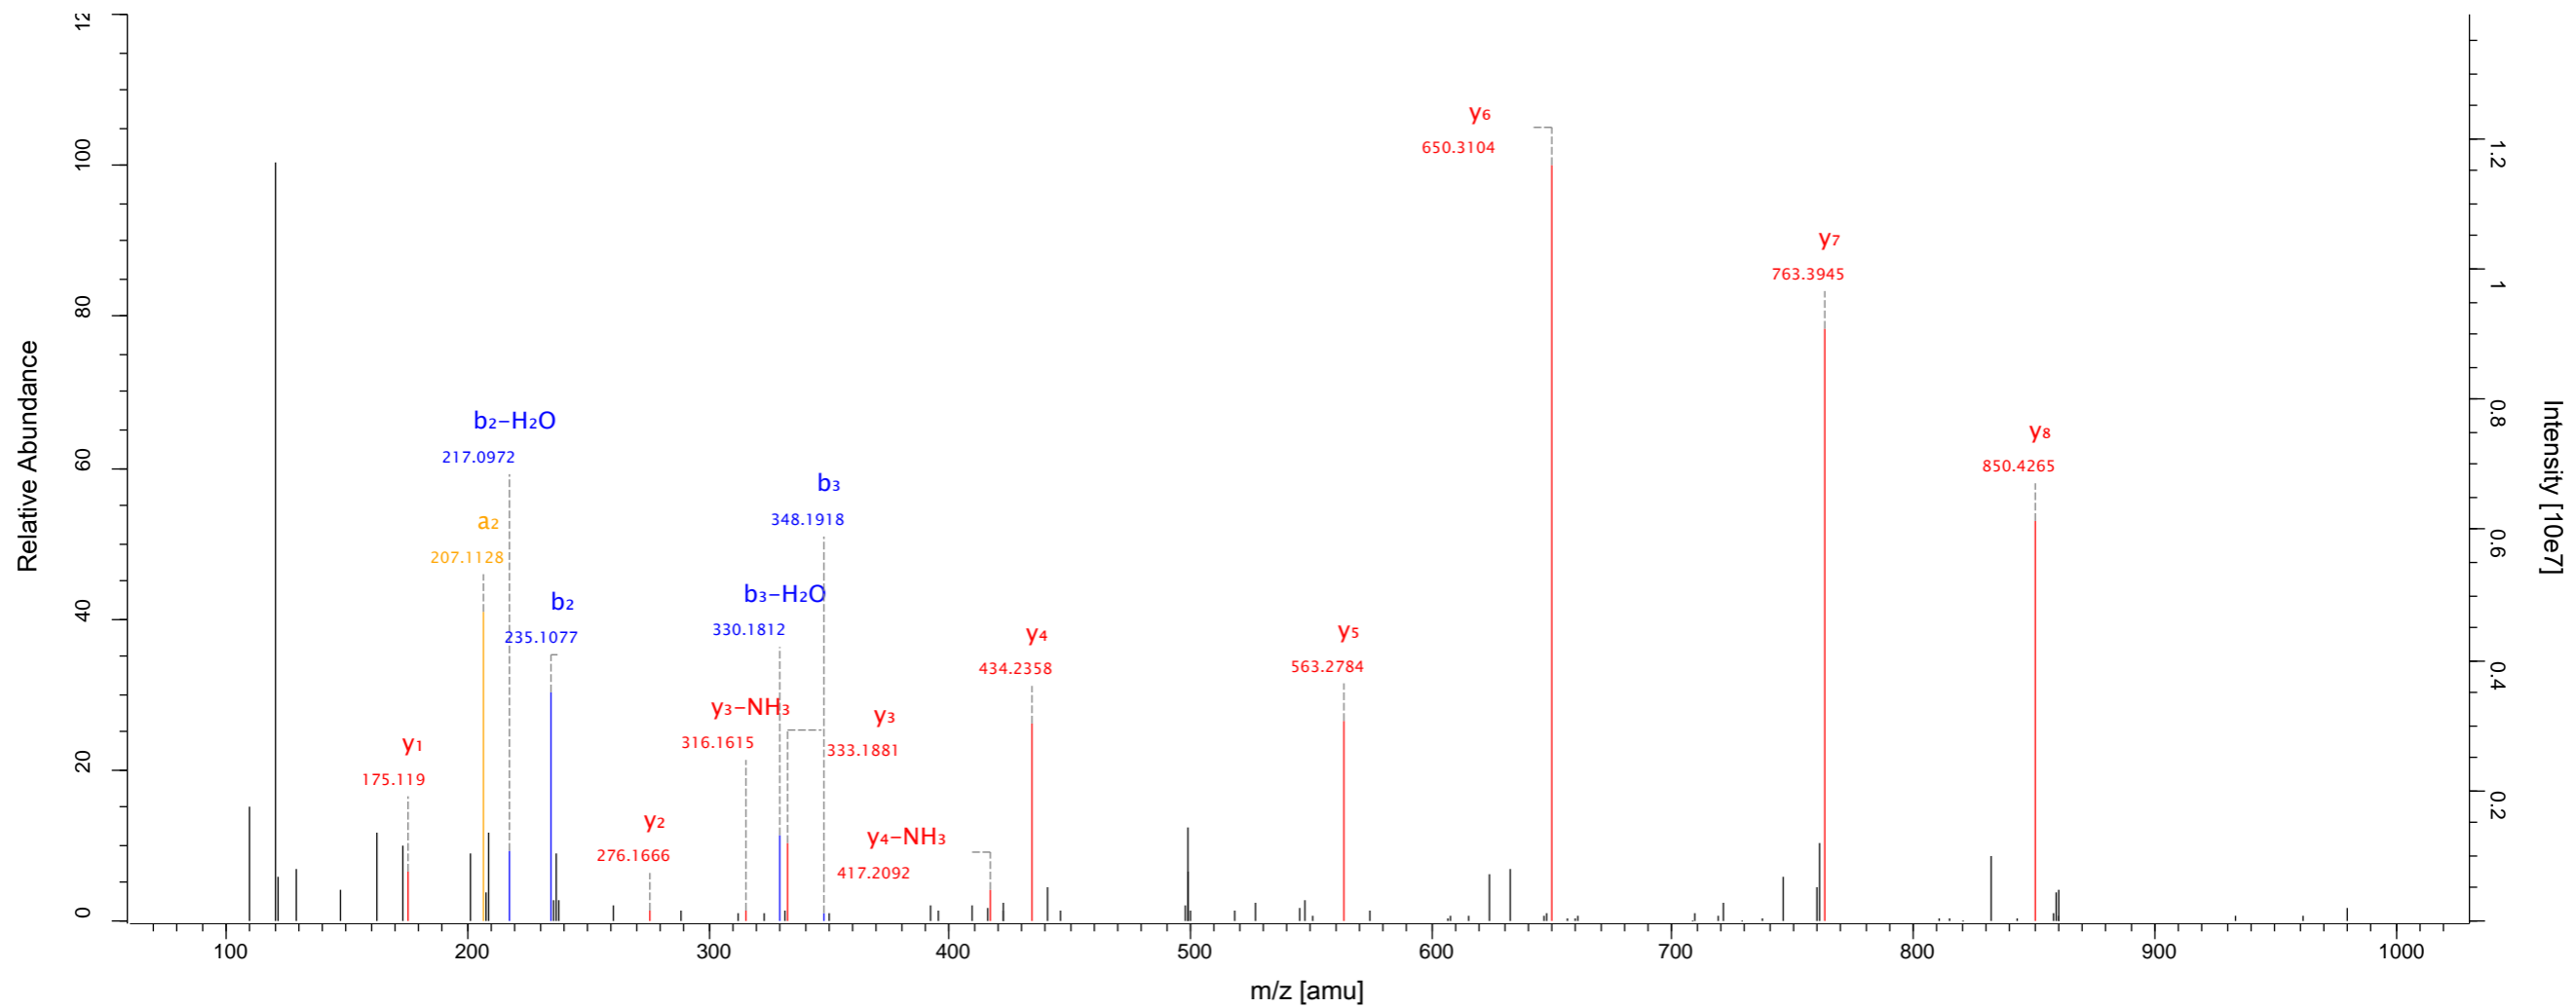

Raw file: 20111212\_EXQ5\_AnMi\_QC\_HCMVp1\_2  
Scan number: 19547  
Protein: ORFL237C - NC\_006273.2[149340,149699]- <unknown description>  
Peptide score: 111.81  
Method: FTMS; HCD

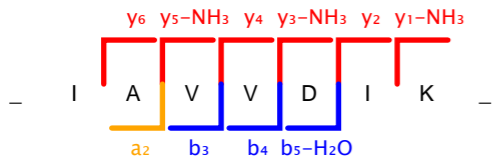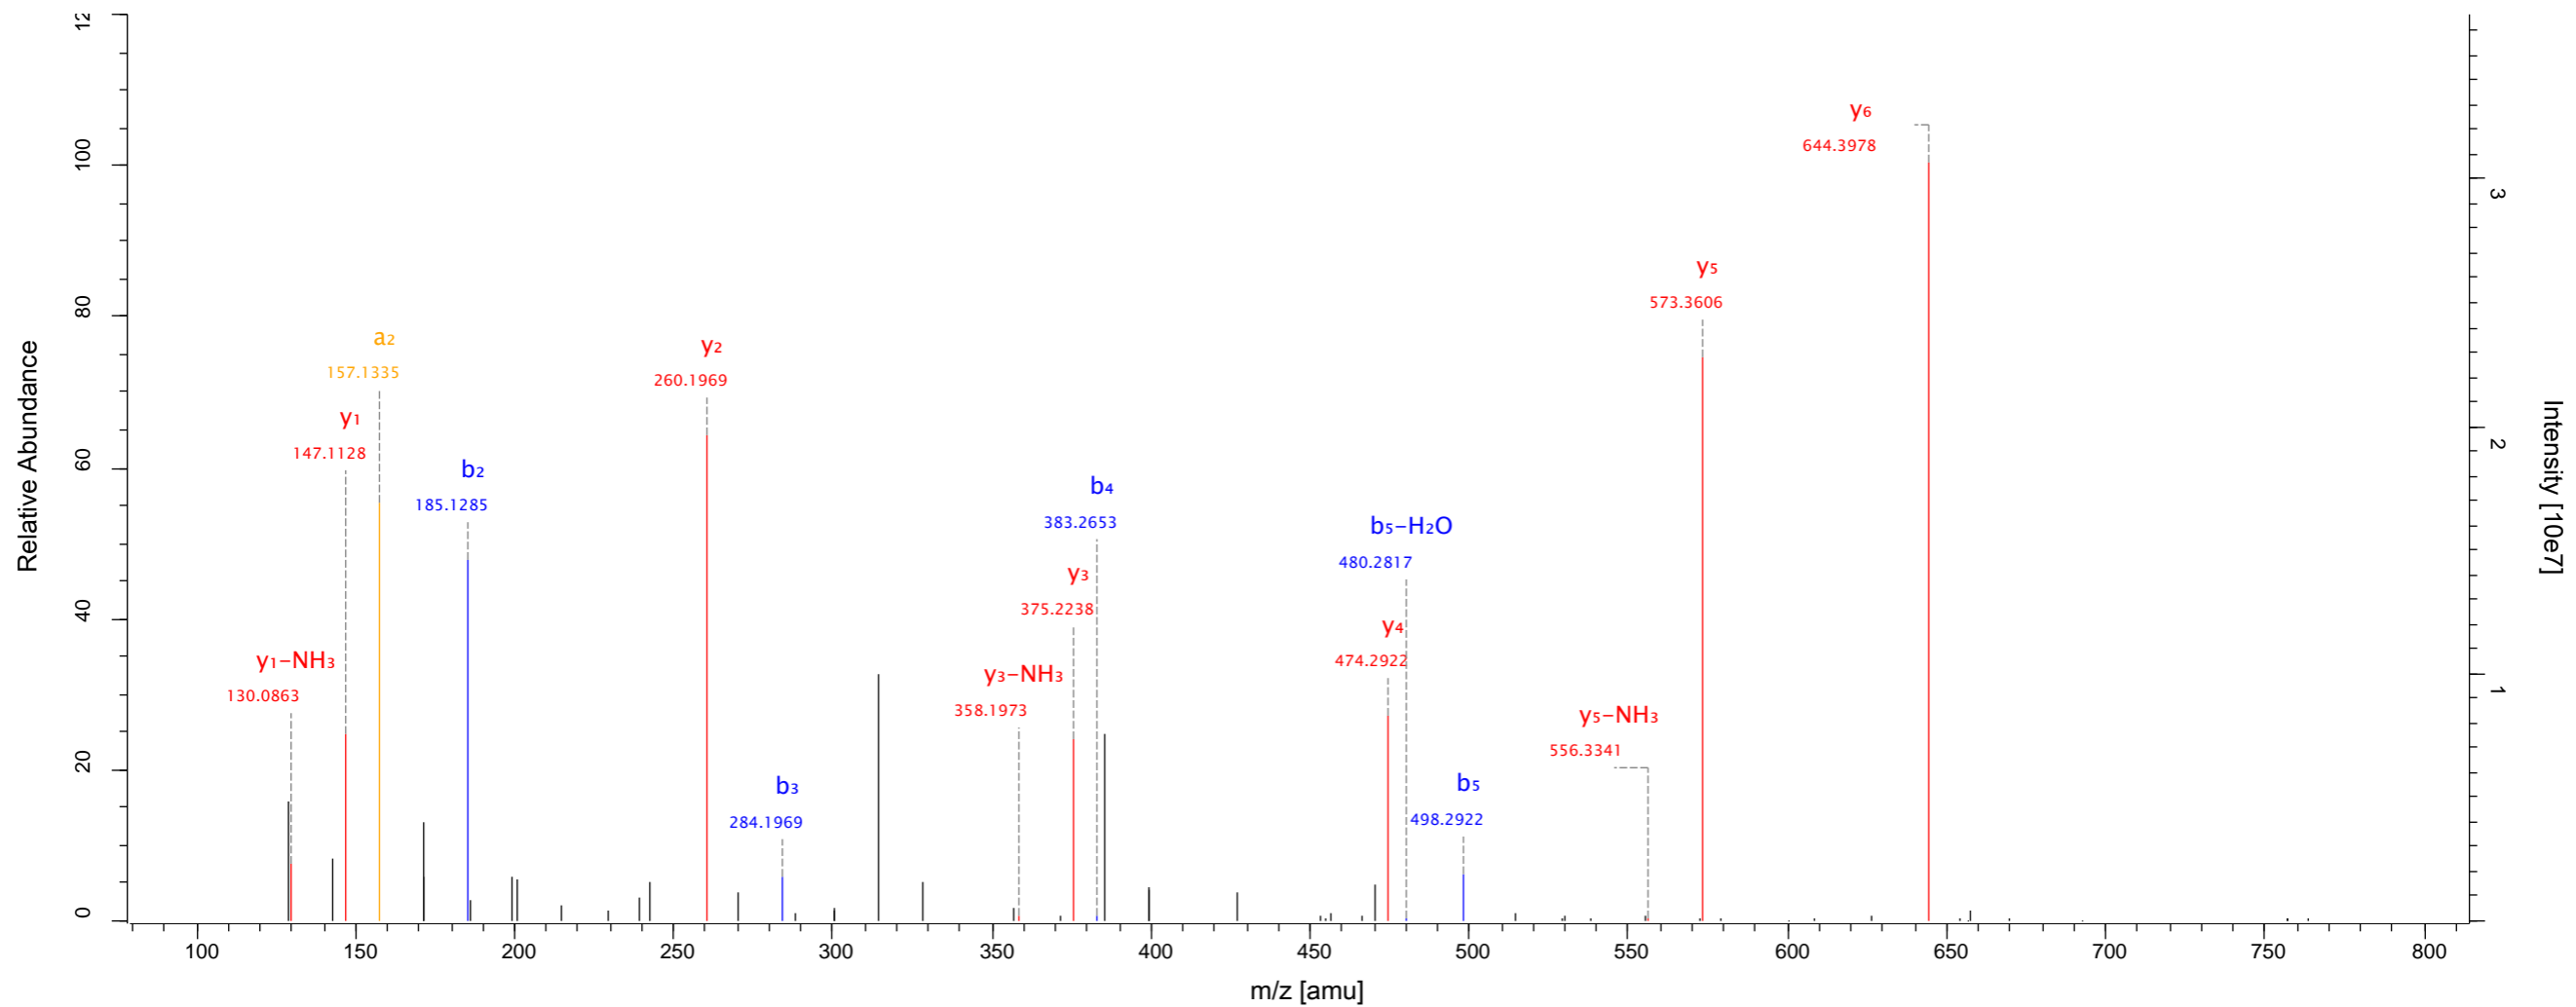

Raw file: 20111212\_EXQ5\_AnMi\_QC\_HCMVp1\_2  
Scan number: 19674  
Protein: ORFL27C - NC\_006273.2[7912,13003]- <unknown description>  
Peptide score: 95.64  
Method: FTMS; HCD

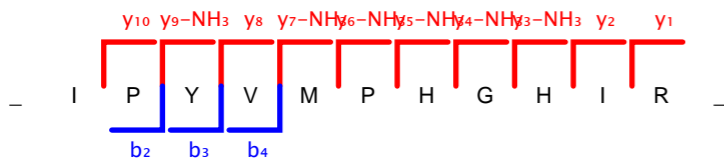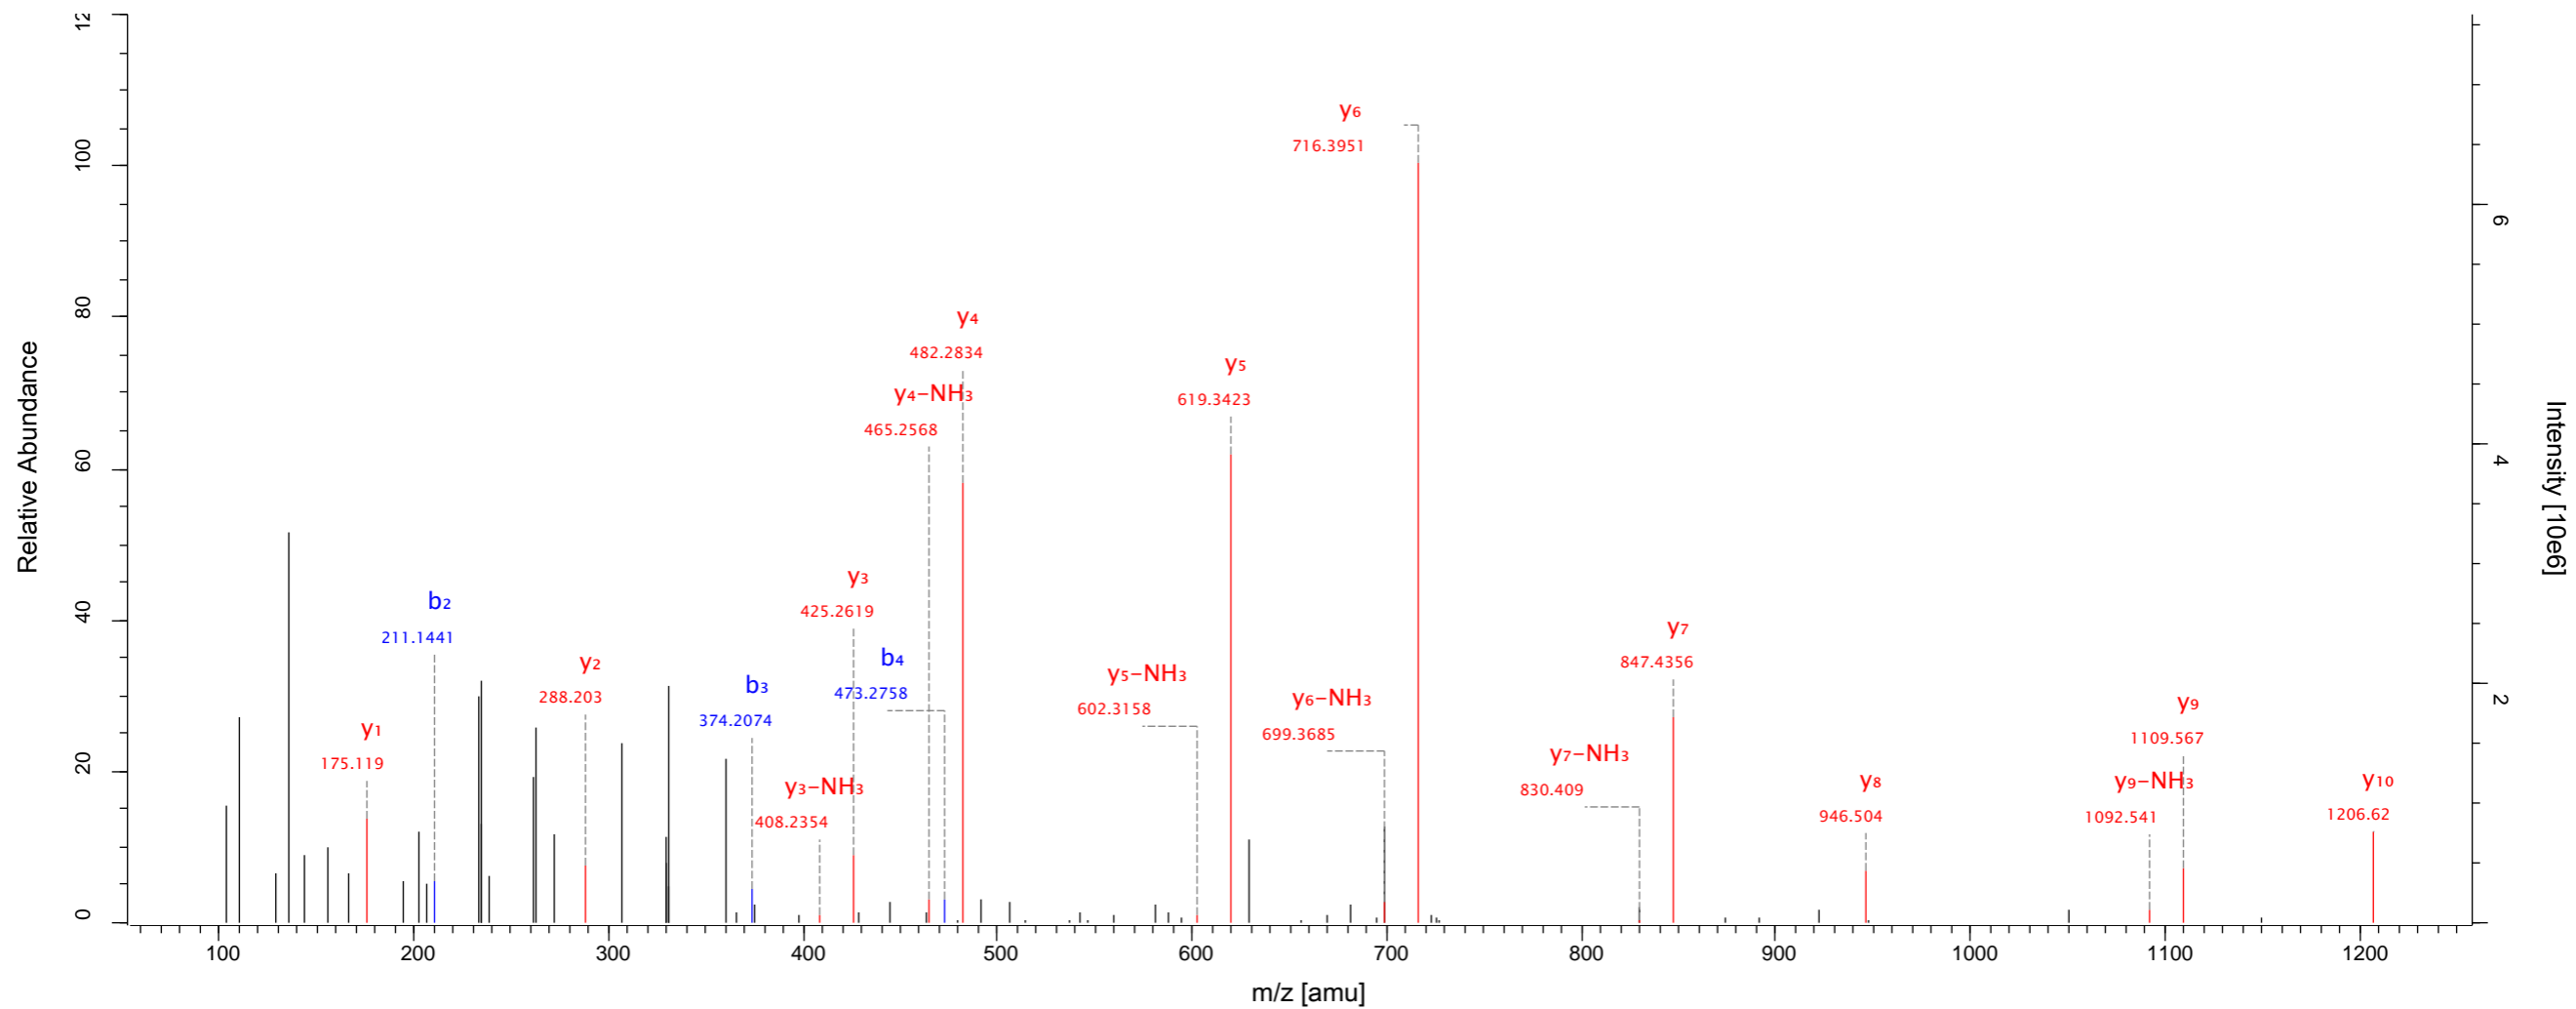



Raw file: 20111212\_EXQ5\_AnMi\_QC\_HCMVp1\_2  
 Scan number: 23697  
 Protein: ORFL142W + NC\_006273.2[78726,79031]+ <unknown description>  
 Peptide score: 107.06  
 Method: FTMS; HCD

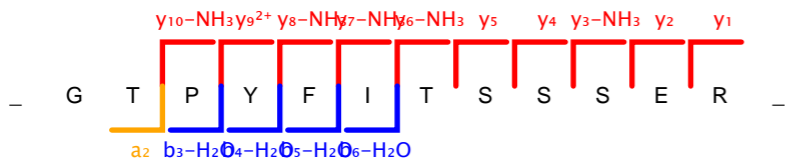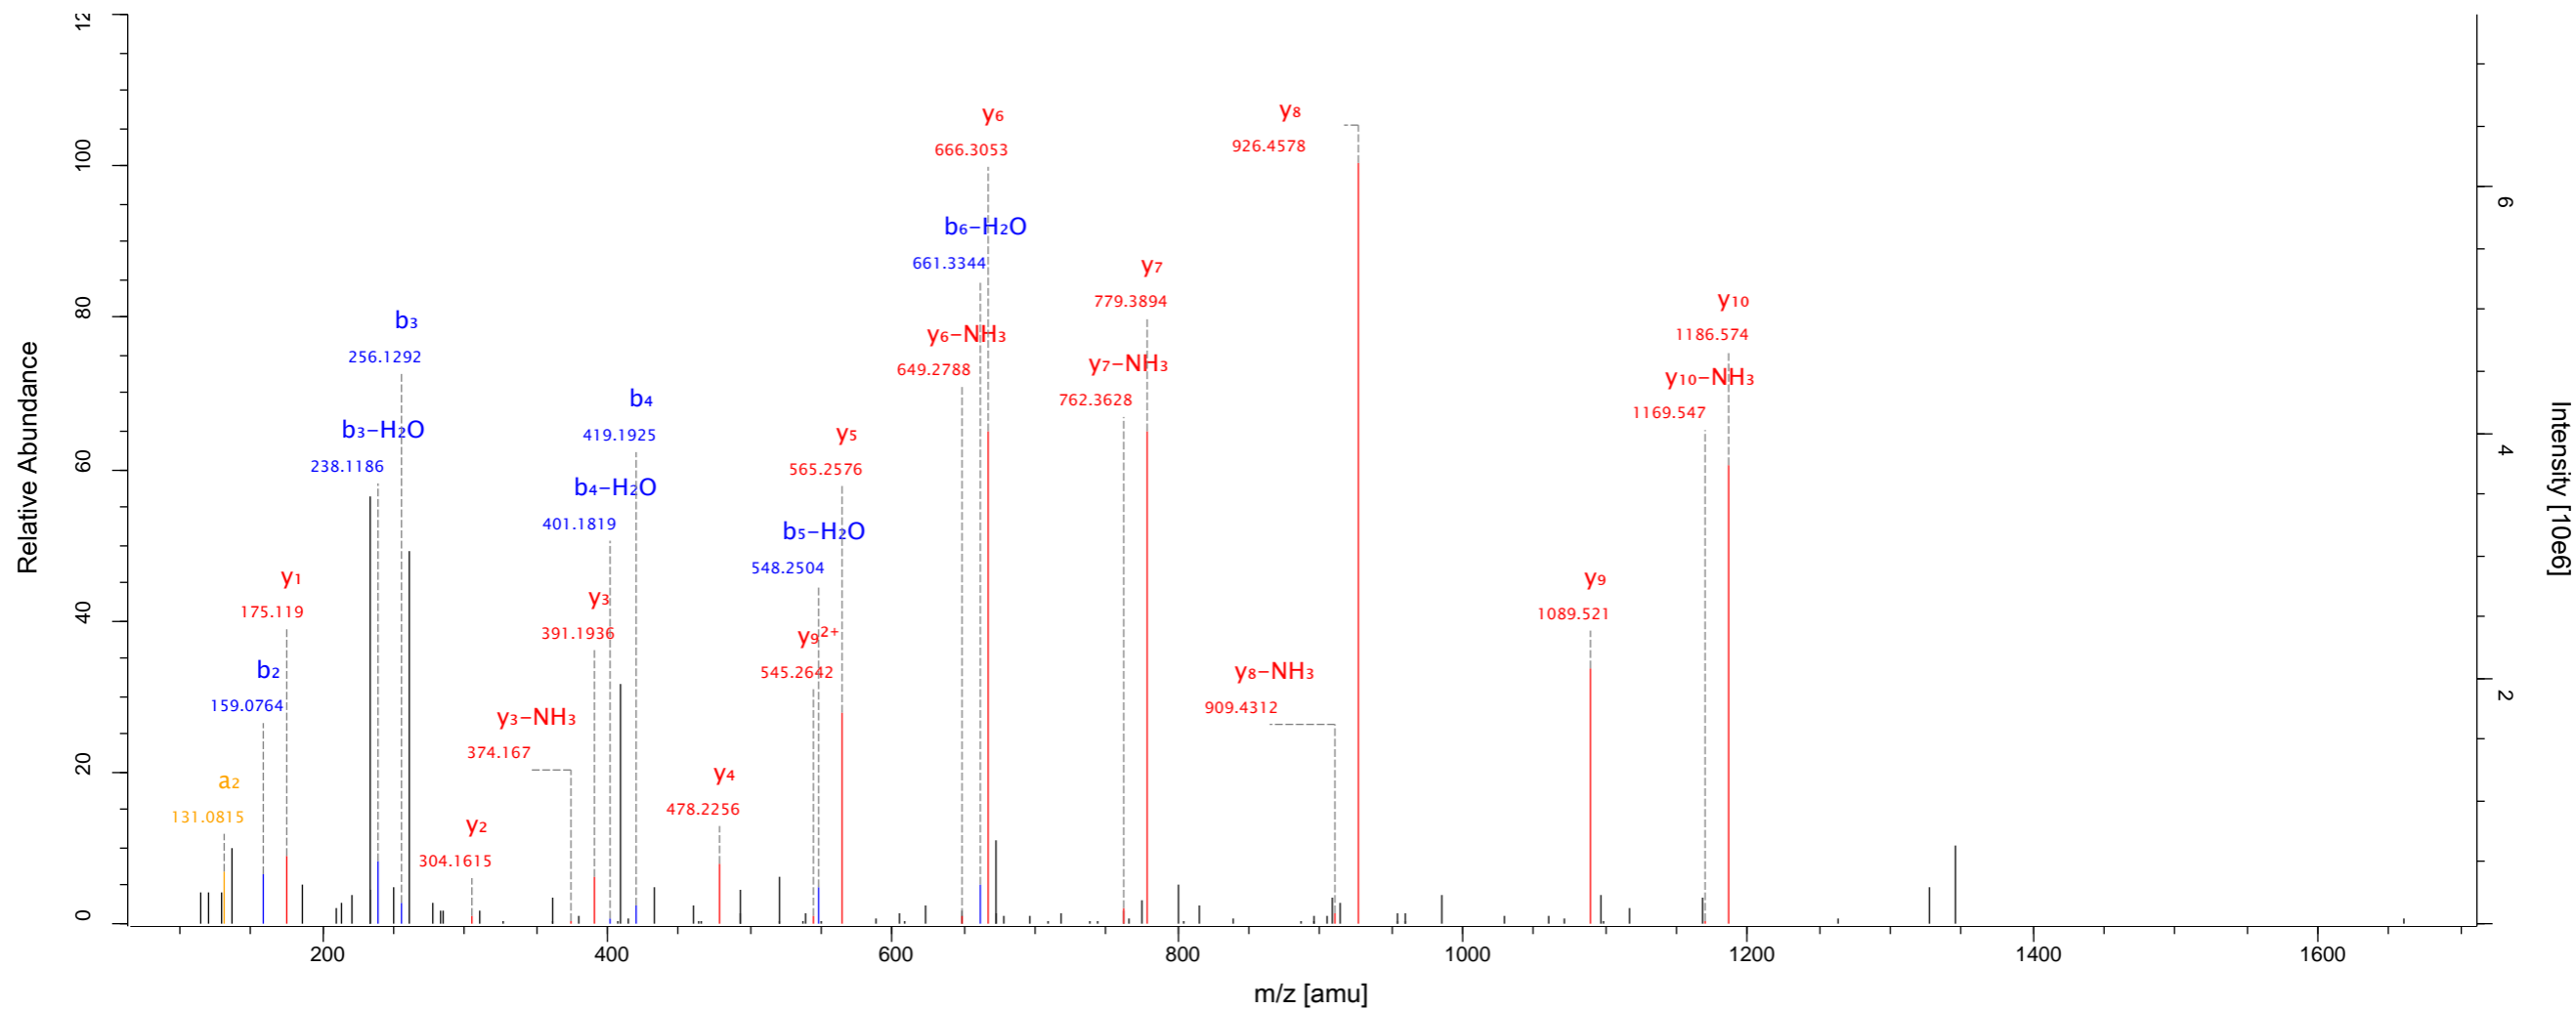

Raw file: 20111212\_EXQ5\_AnMi\_QC\_HCMVp1\_2  
Scan number: 23913  
Protein: ORFL106C - NC\_006273.2[53935,54294]- <unknown description>  
Peptide score: 154.56  
Method: FTMS; HCD

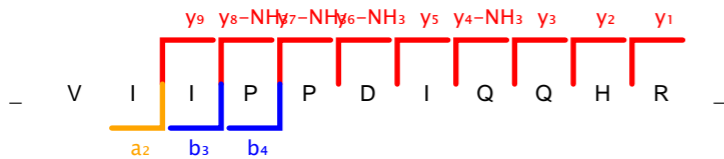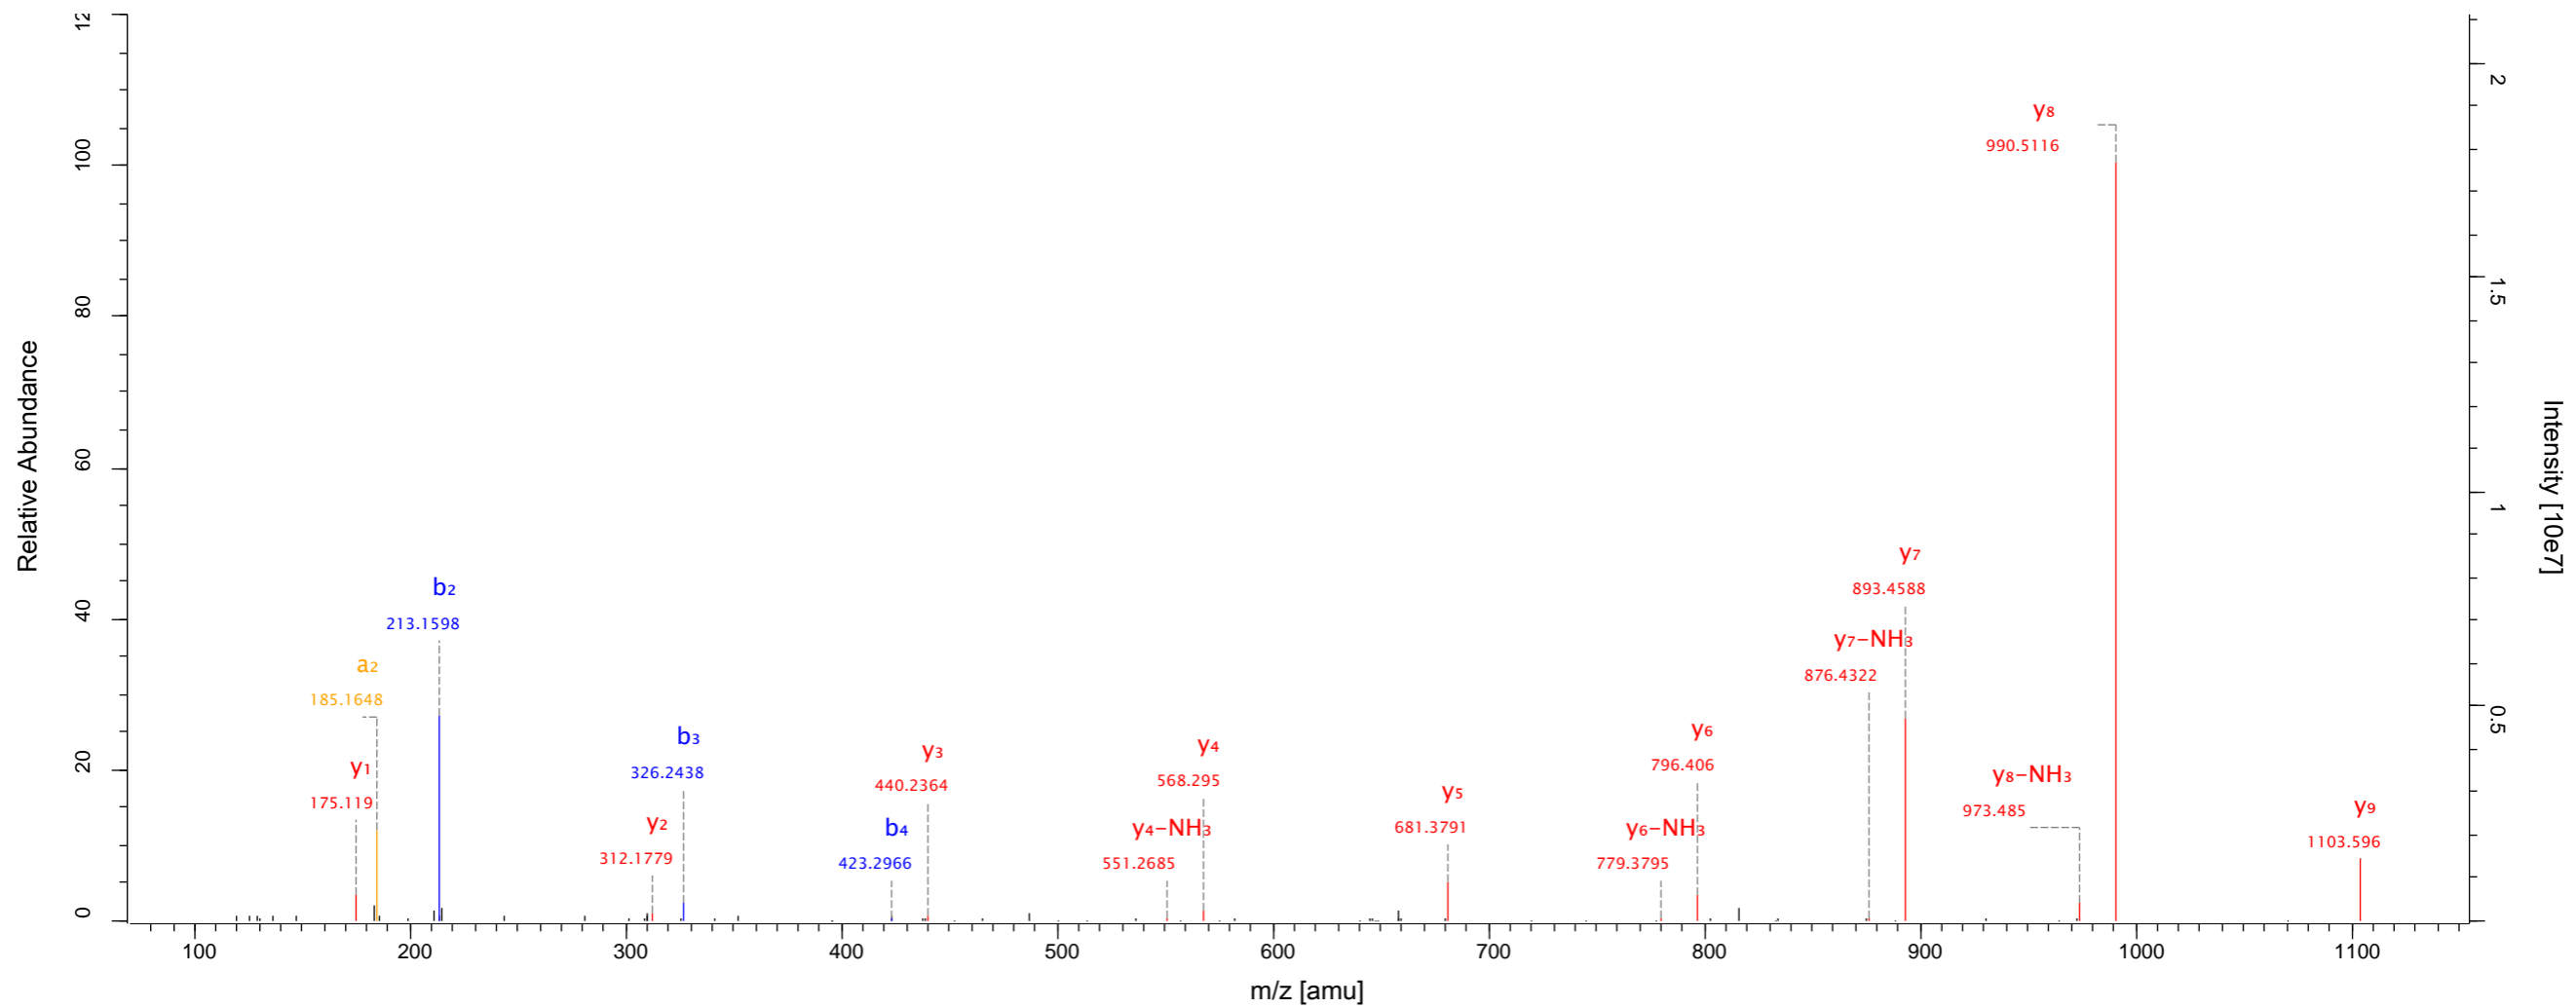

Raw file: 20111212\_EXQ5\_AnMi\_QC\_HCMVp1\_2  
Scan number: 36698  
Protein: ORFS343C.iORF1 - NC\_006273.2[210869,211213]- <unknown description>  
Peptide score: 107.18  
Method: FTMS; HCD

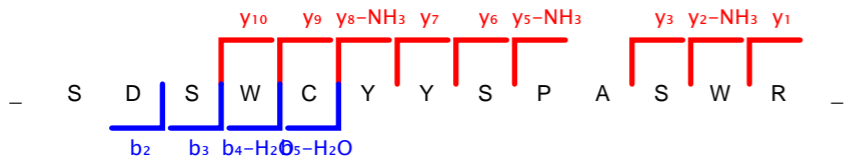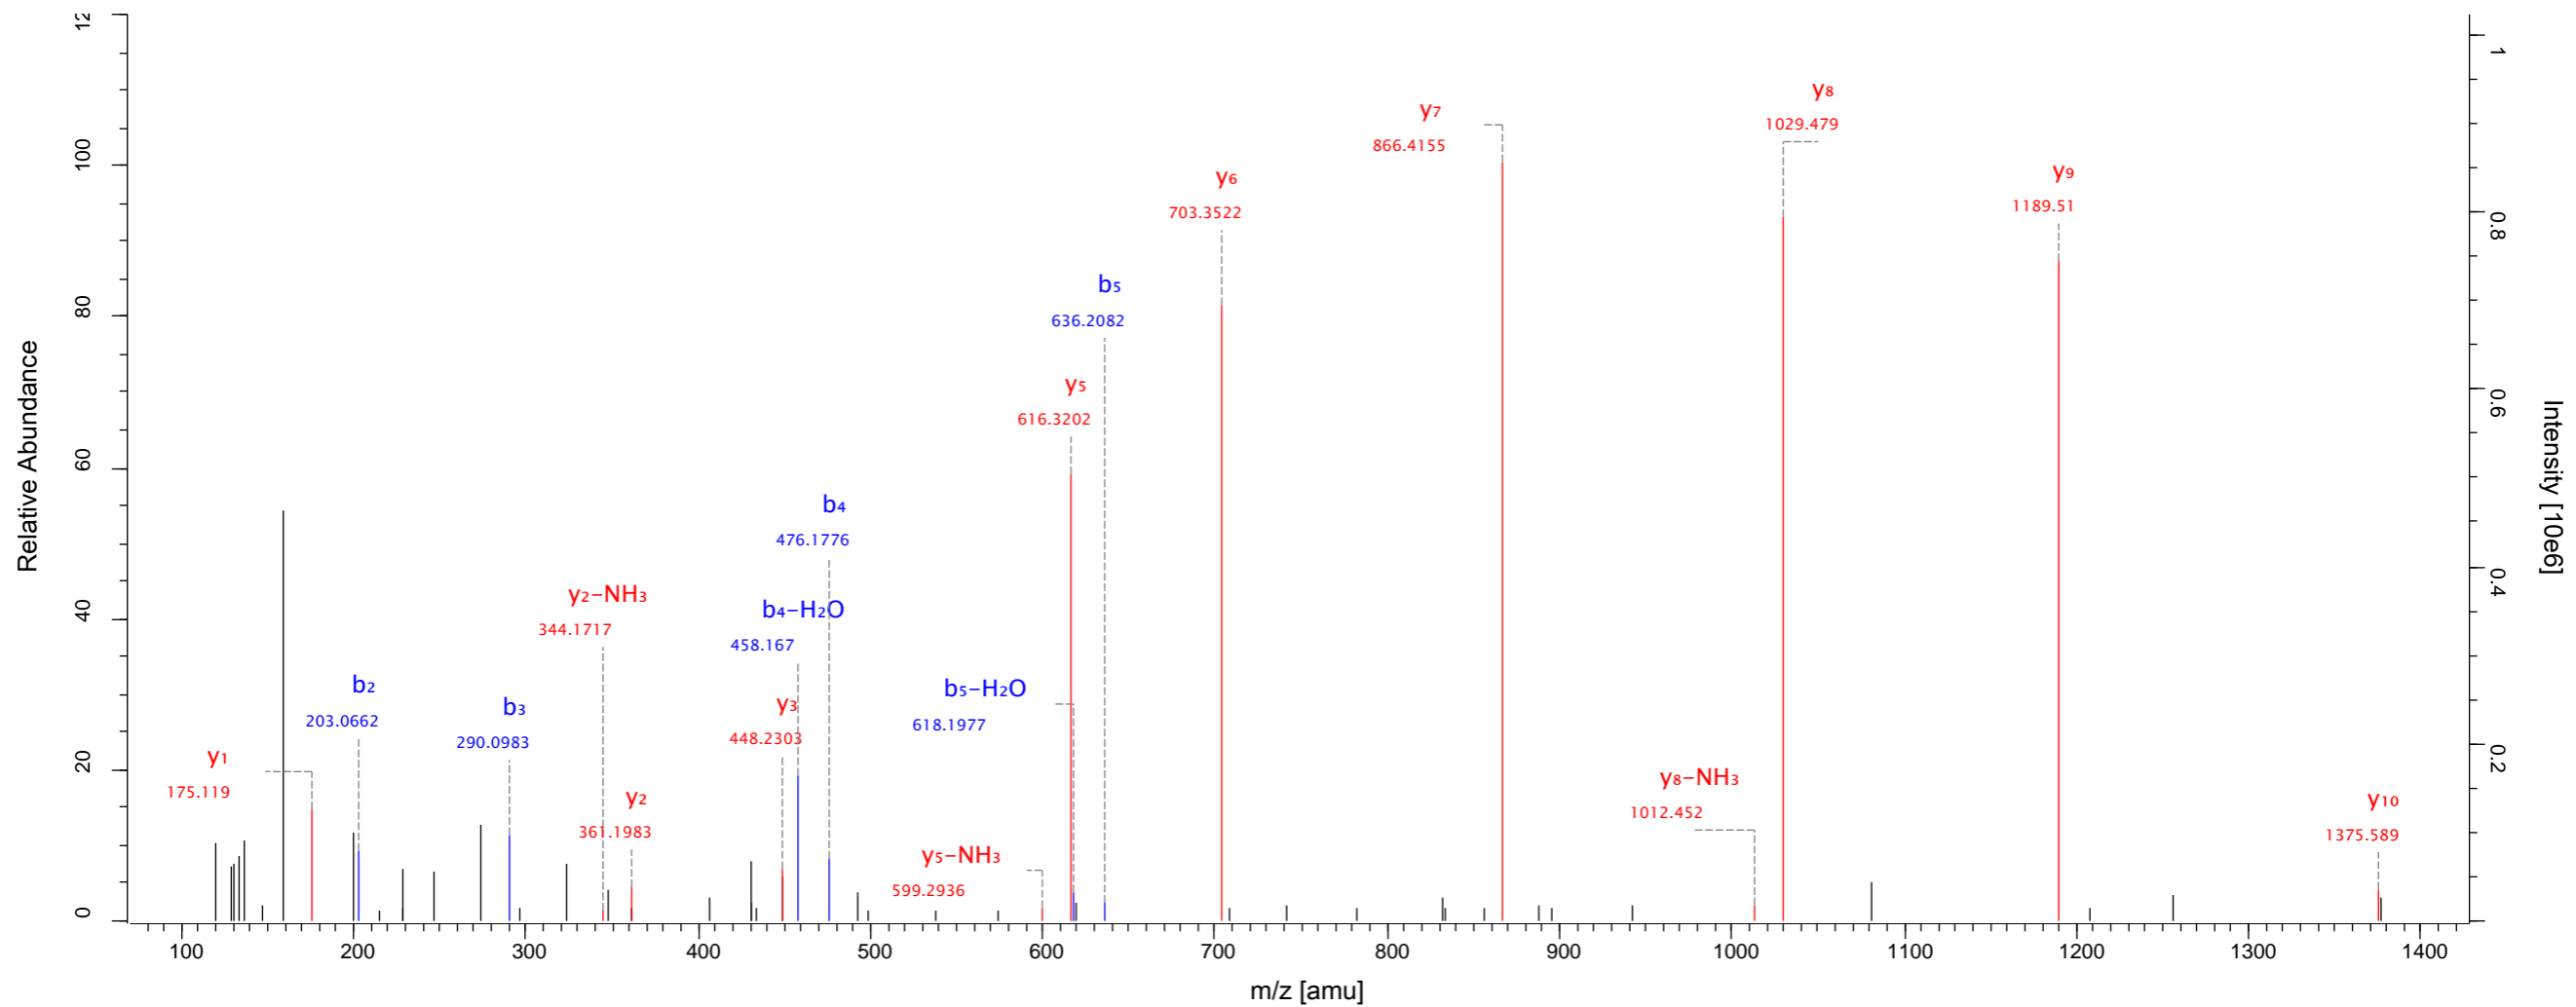

Raw file: 20111212\_EXQ5\_AnMi\_QC\_HCMVp1\_2  
Scan number: 37368  
Protein: ORFS365W + NC\_006273.2[225950,226606]+ <unknown description>  
Peptide score: 104.41  
Method: FTMS; HCD

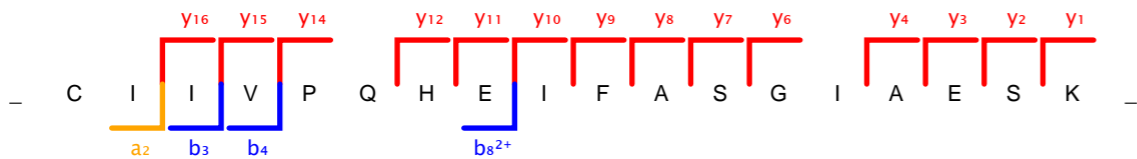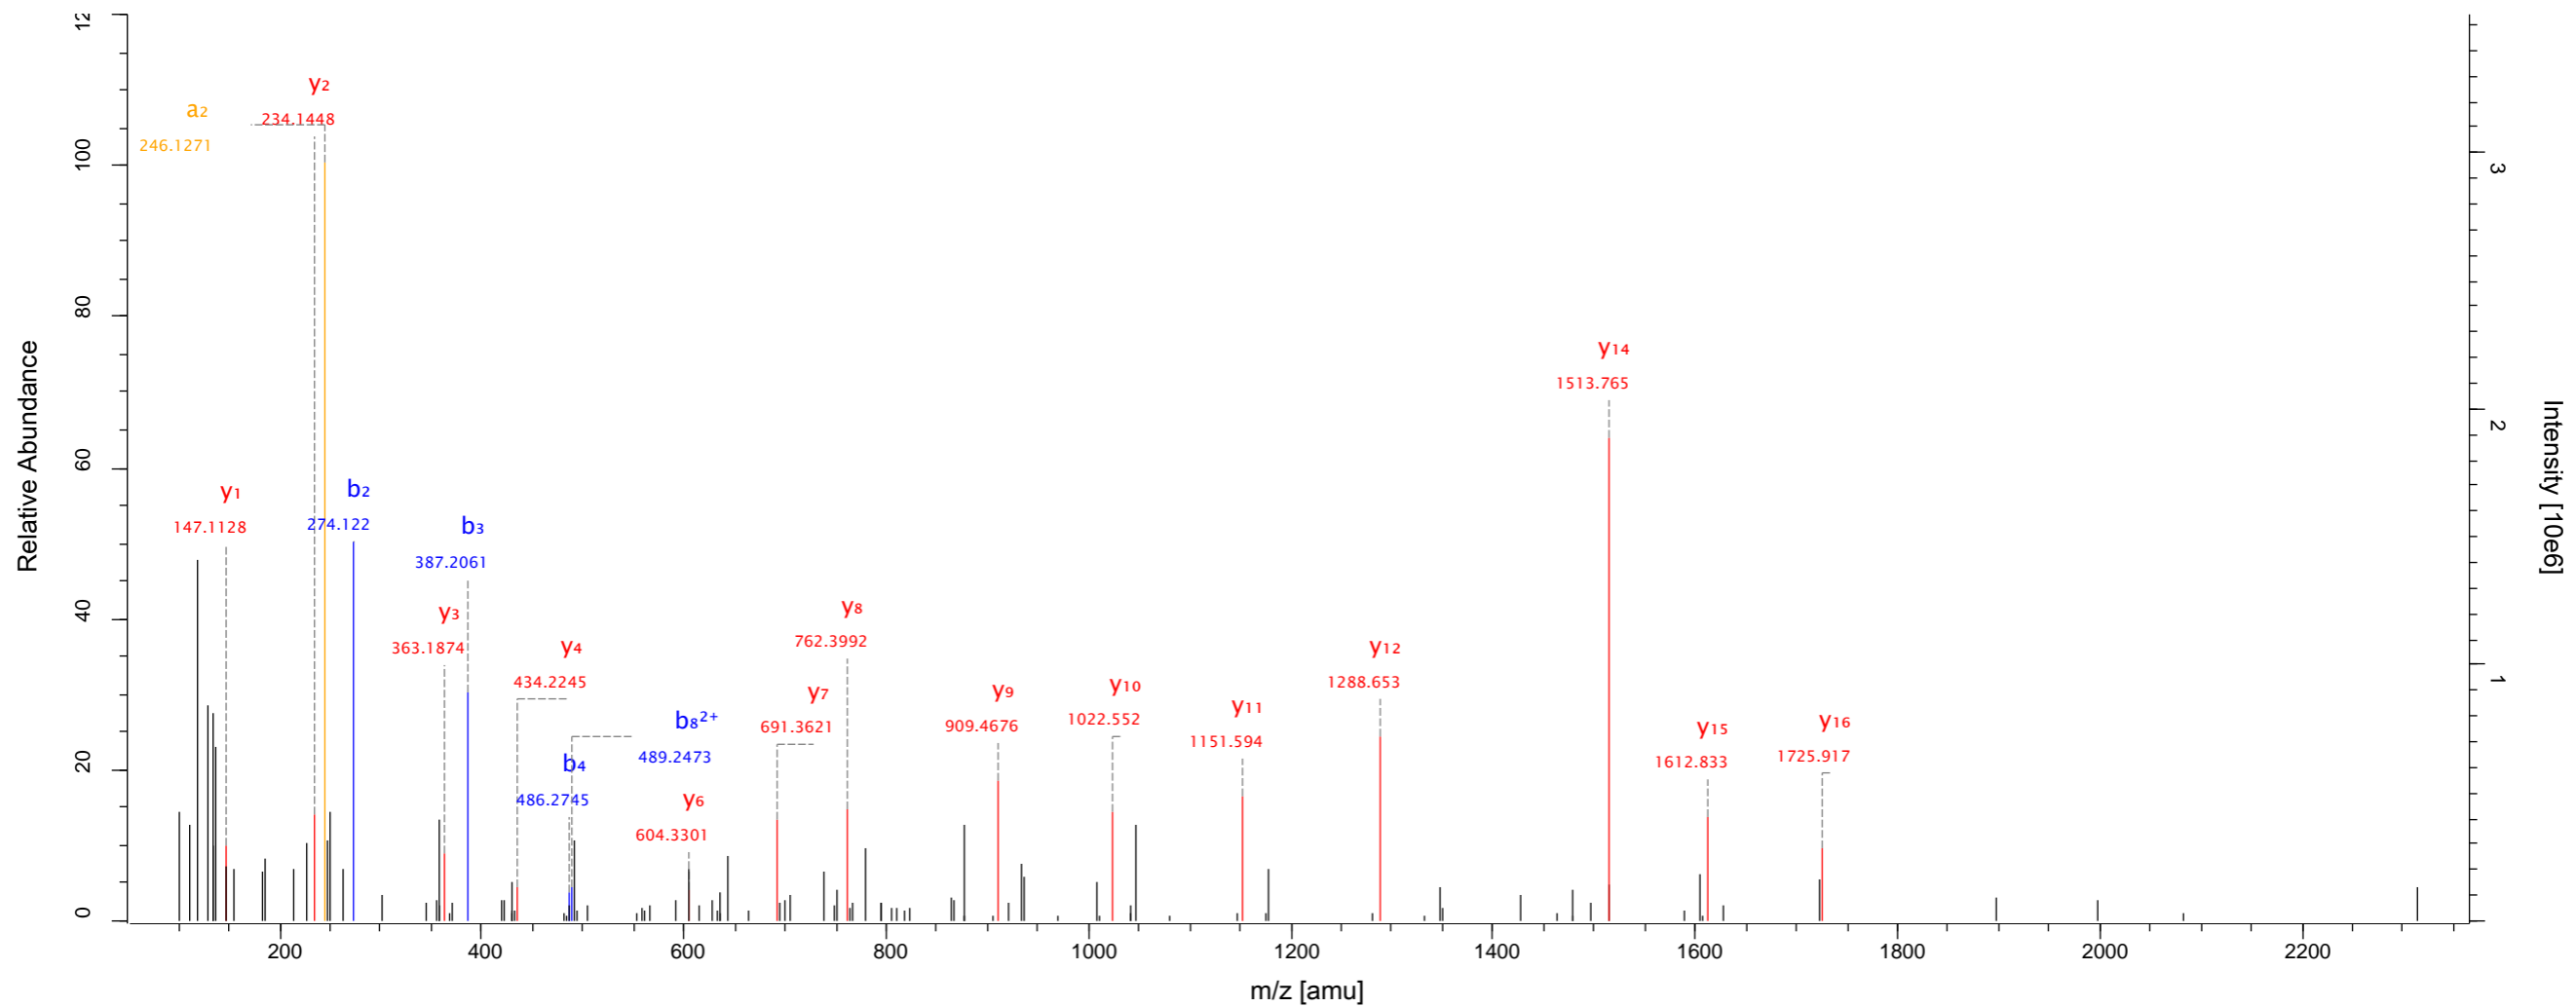

Raw file: 20111212\_EXQ5\_AnMi\_QC\_HCMVp1\_2  
Scan number: 39208  
Protein: ORFS343C.iORF1 - NC\_006273.2[210869,211213]- <unknown description>  
Peptide score: 78.56  
Method: FTMS; HCD

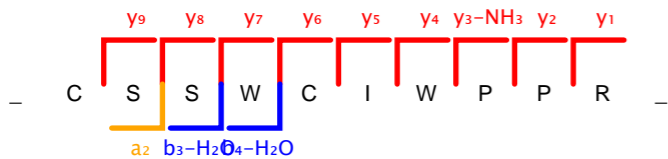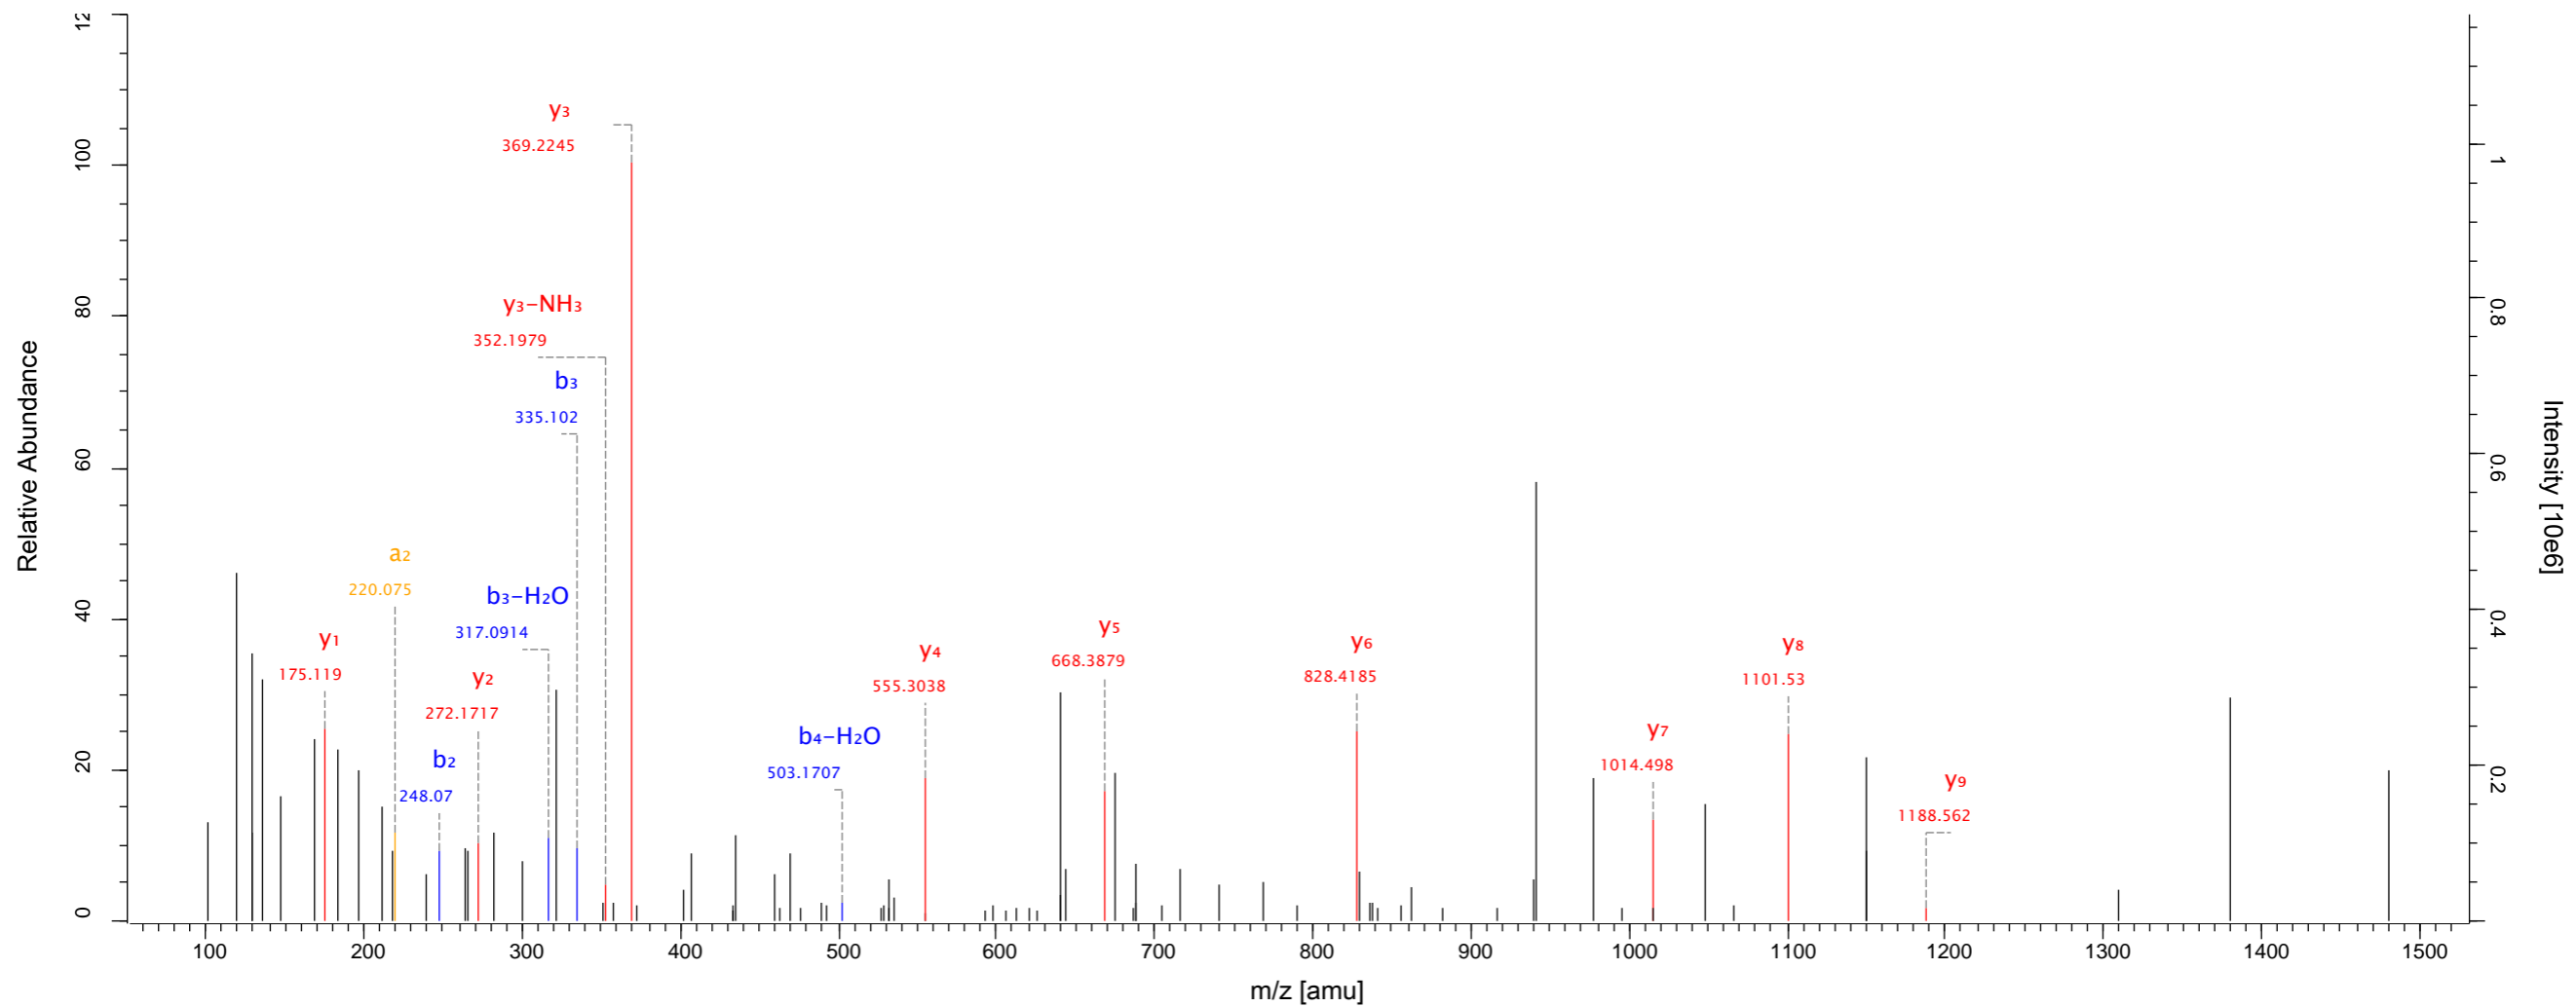

Raw file: 20111212\_EXQ5\_AnMi\_QC\_HCMVp1\_2  
 Scan number: 40151  
 Protein: ORFL151C - NC\_006273.2[92499,92870]- <unknown description>  
 Peptide score: 132.09  
 Method: FTMS; HCD

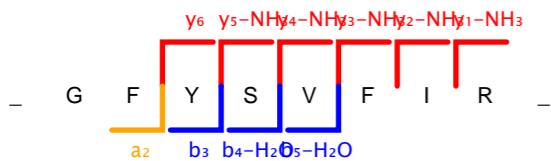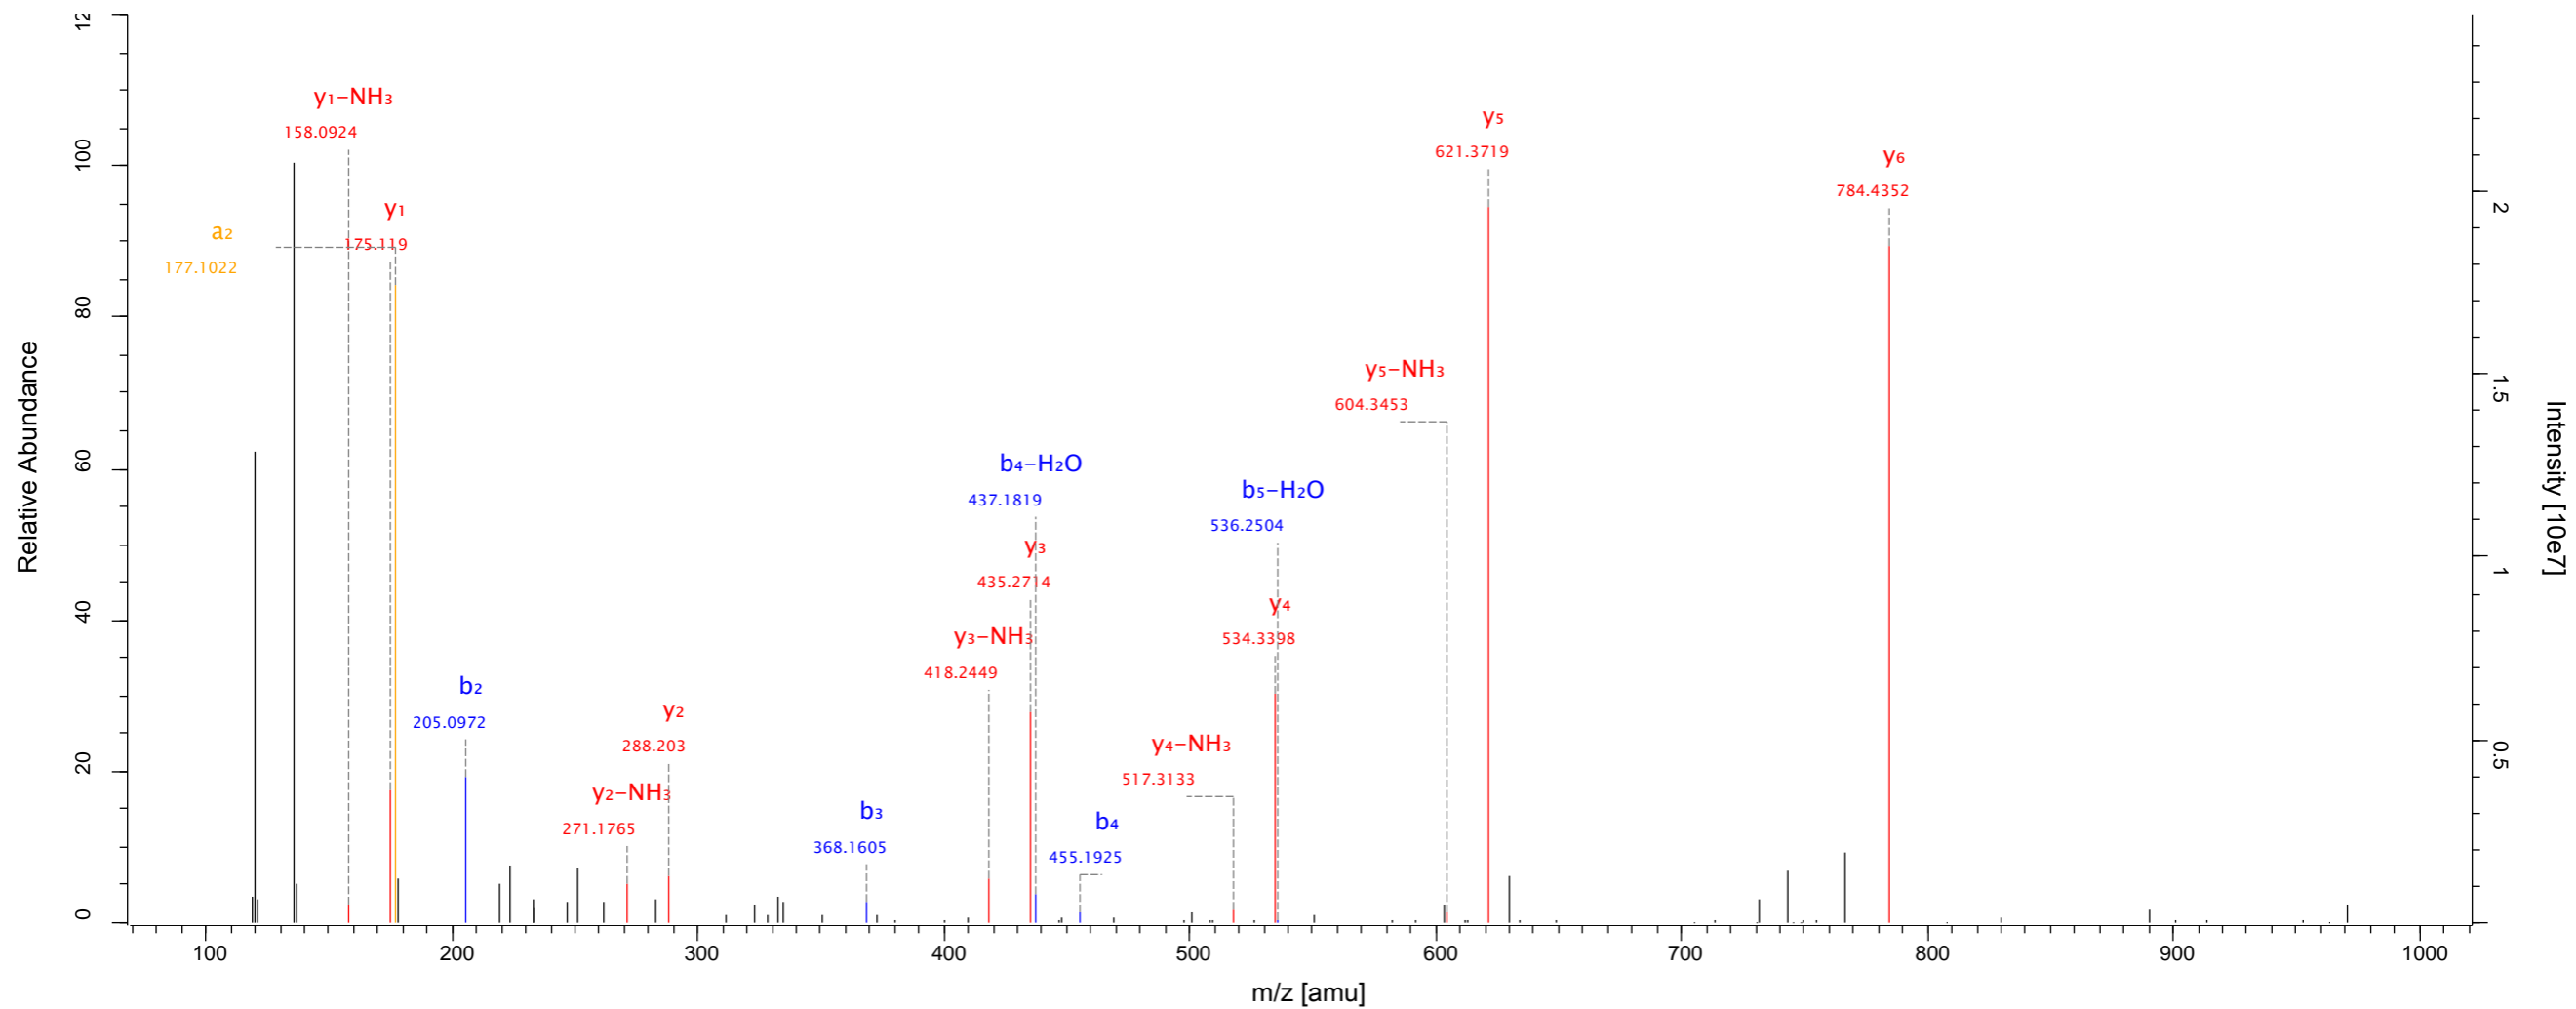

Raw file: 20111212\_EXQ5\_AnMi\_QC\_HCMVp1\_2  
Scan number: 42230  
Protein: ORFS343C.iORF1 - NC\_006273.2[210869,211213]- <unknown description>  
Peptide score: 88.55  
Method: FTMS; HCD

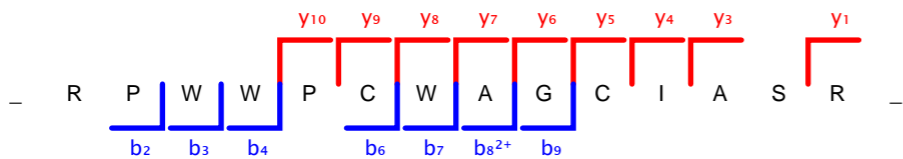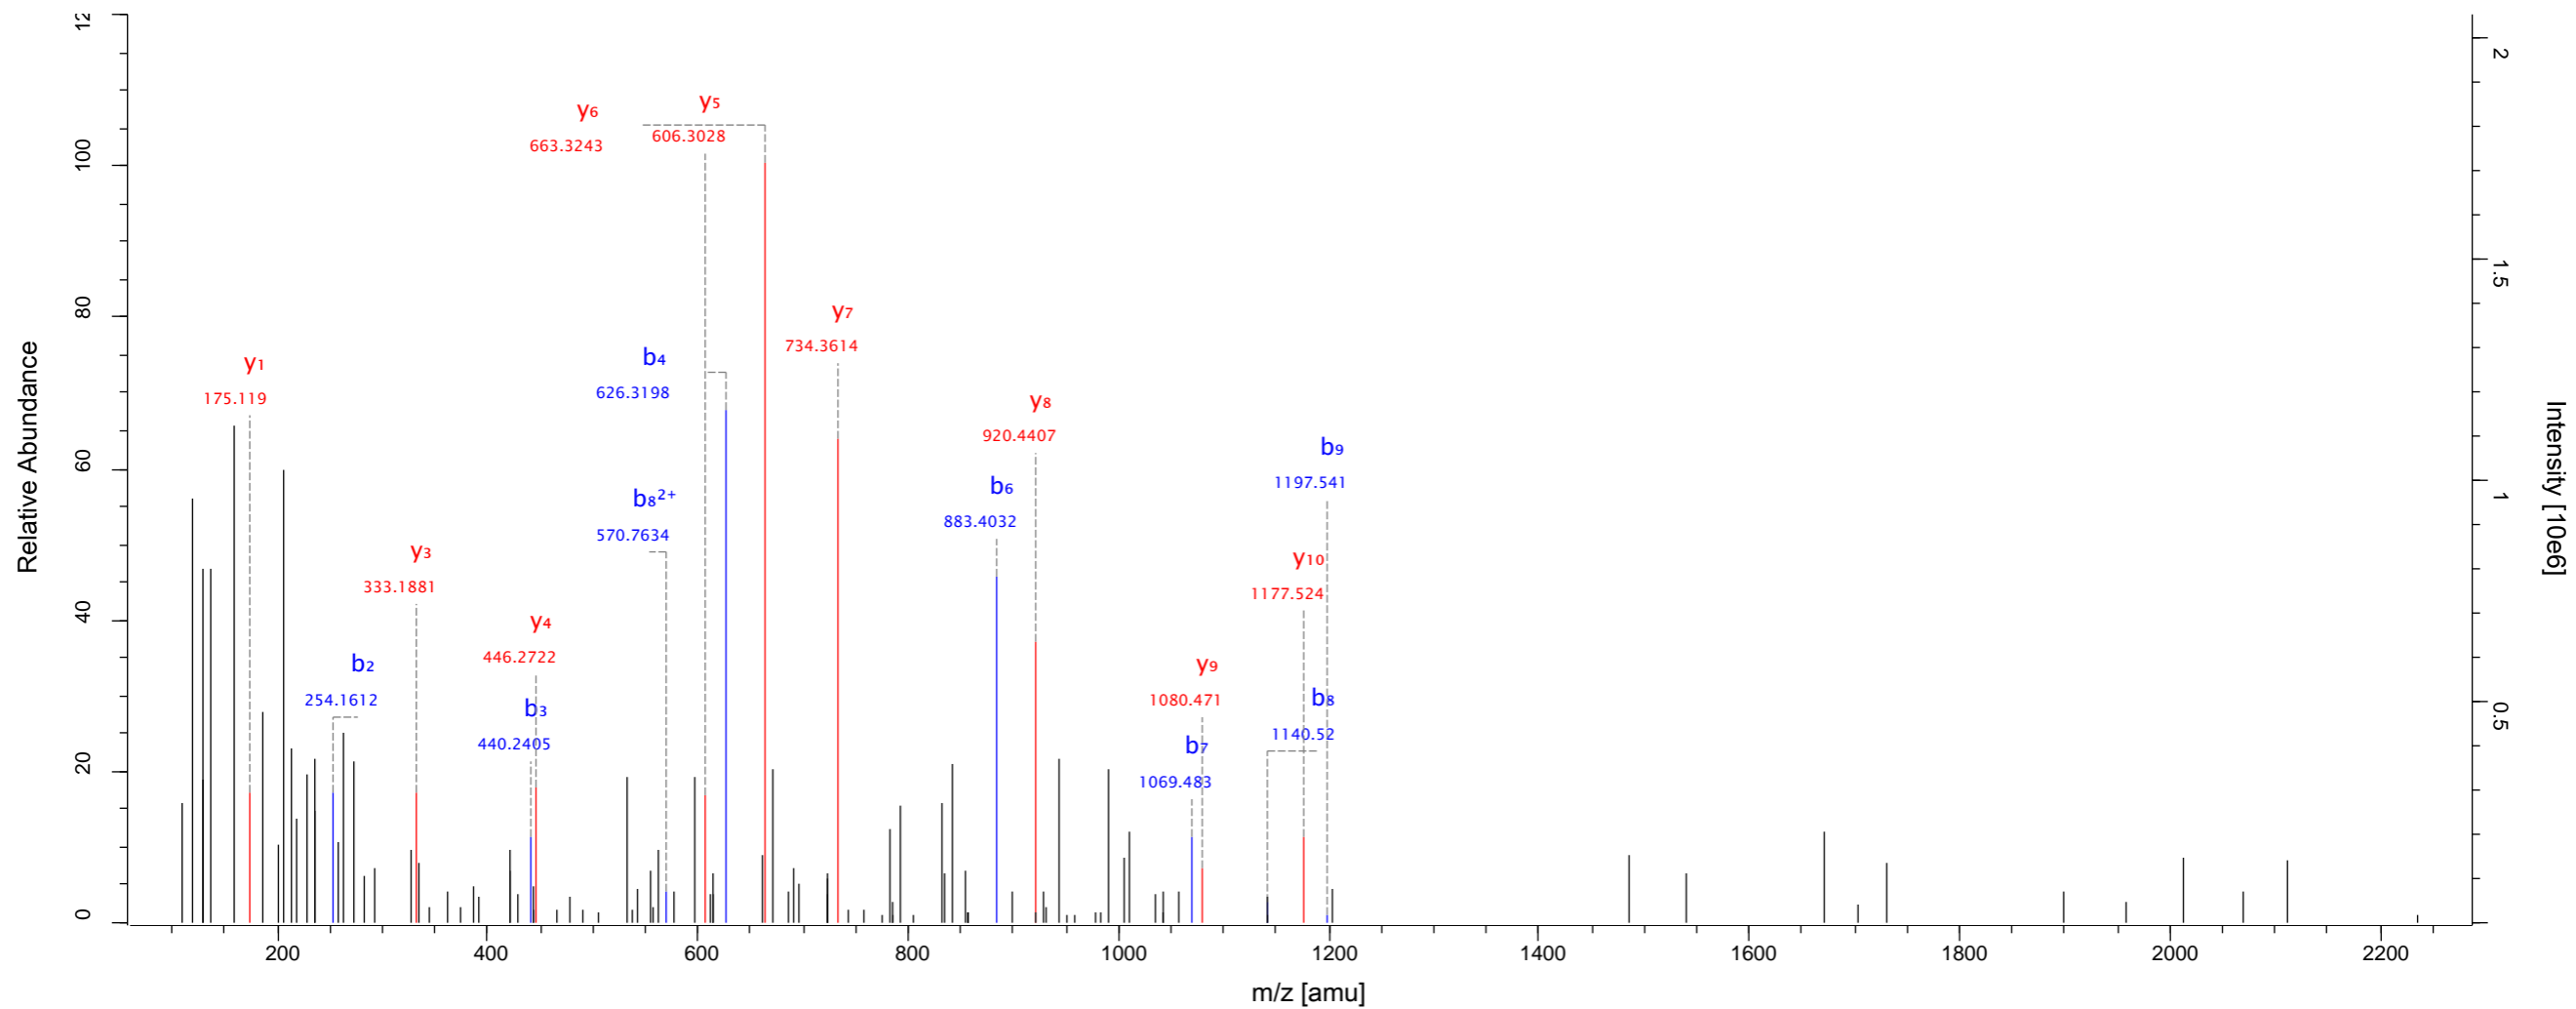

Raw file: 20111212\_EXQ5\_AnMi\_QC\_HCMVp1\_2  
Scan number: 42479  
Protein: ORFL174C.iORF2 - NC\_006273.2[106396,106770]- <unknown description>  
Peptide score: 89.54  
Method: FTMS; HCD

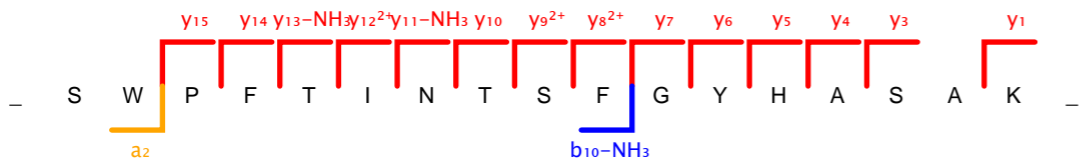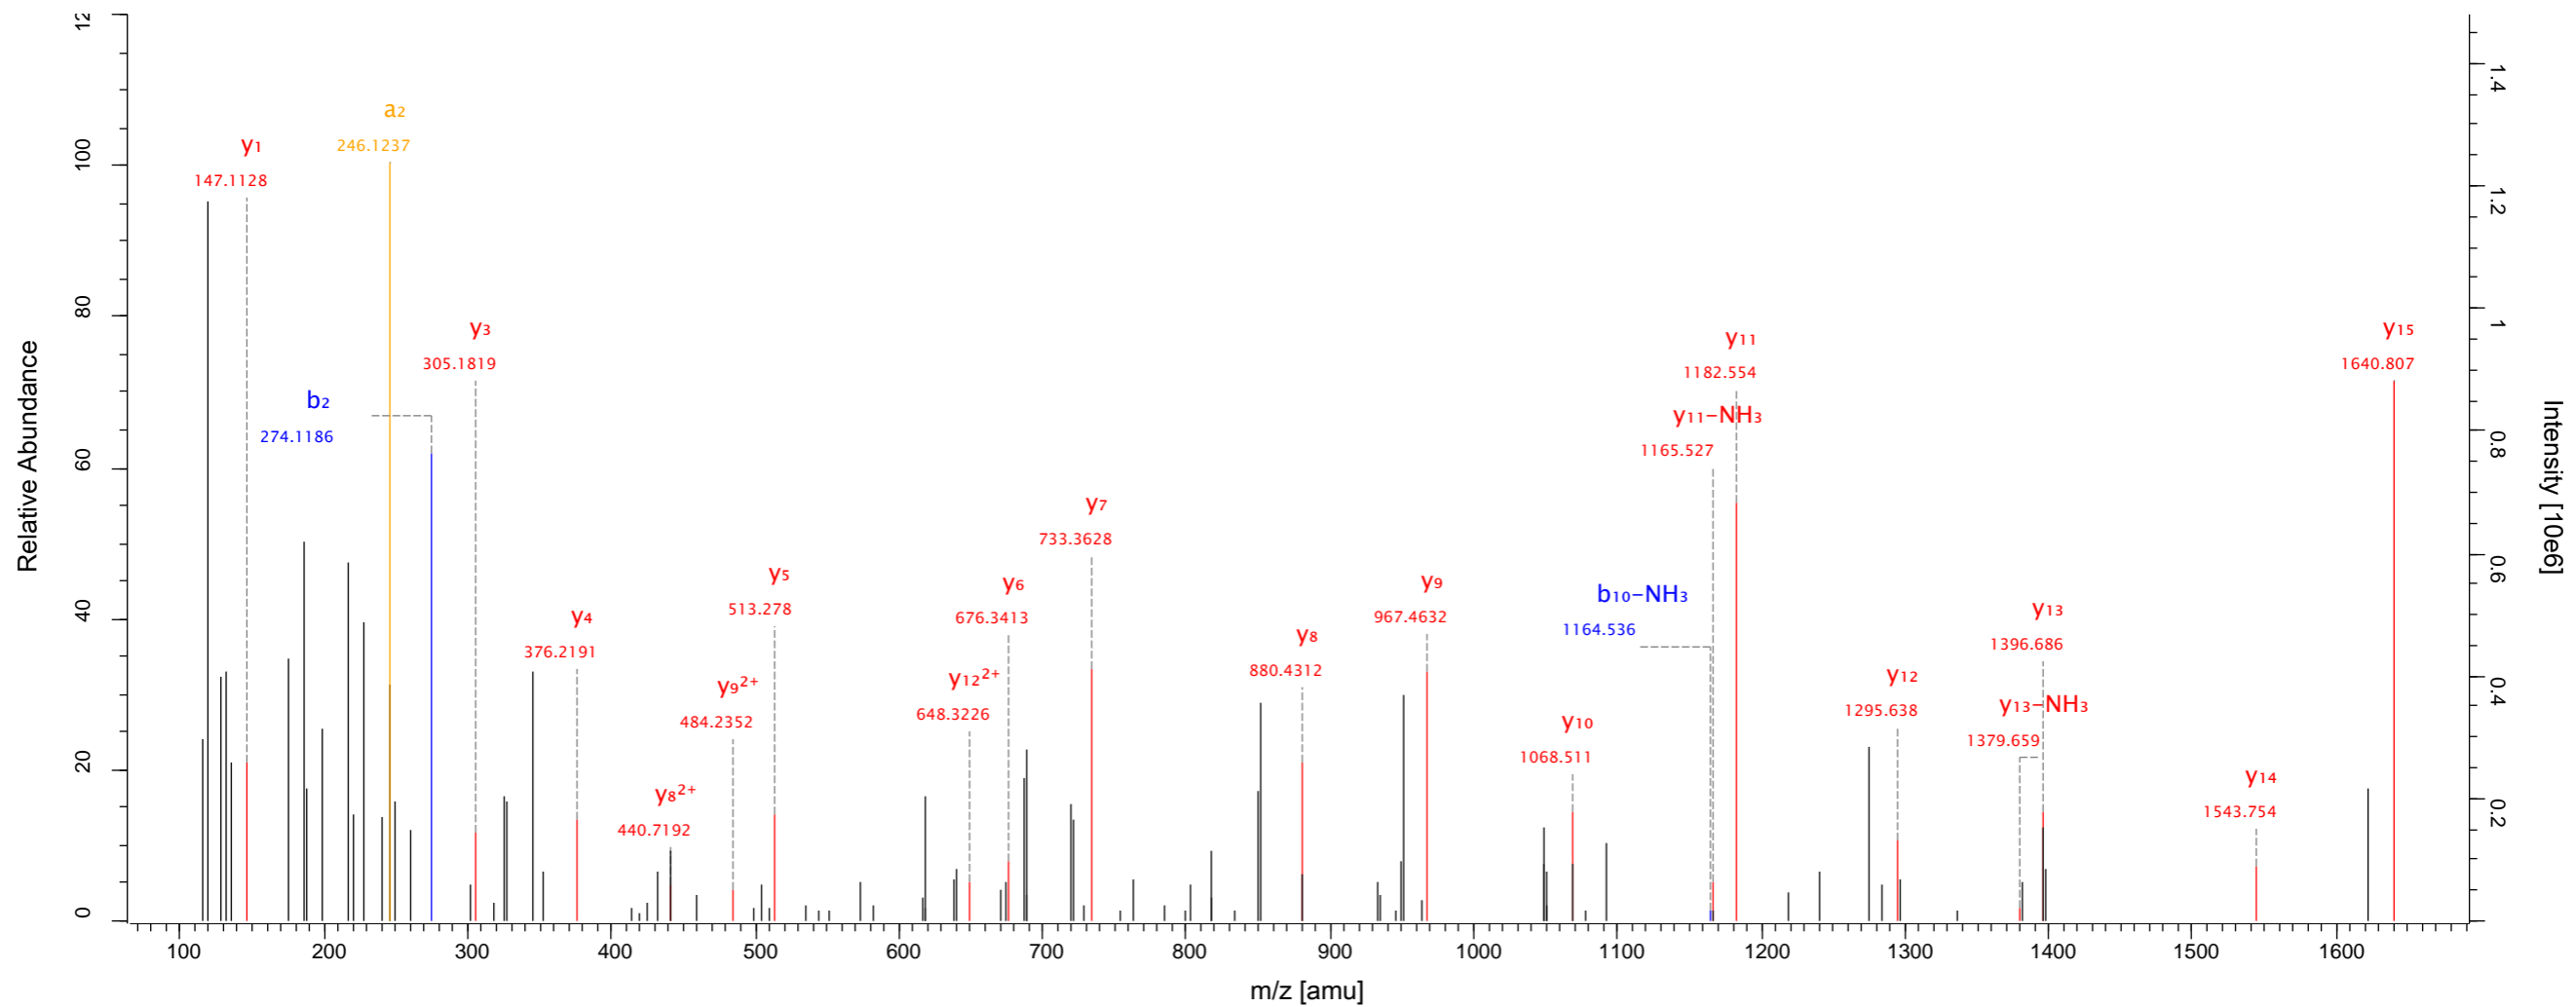



Raw file: 20111212\_EXQ5\_AnMi\_QC\_HCMVp11\_2  
 Scan number: 43488  
 Protein: ORFL161C.iORF2 - NC\_006273.2[101063,101479]- <unknown description>  
 Peptide score: 194.25  
 Method: FTMS; HCD

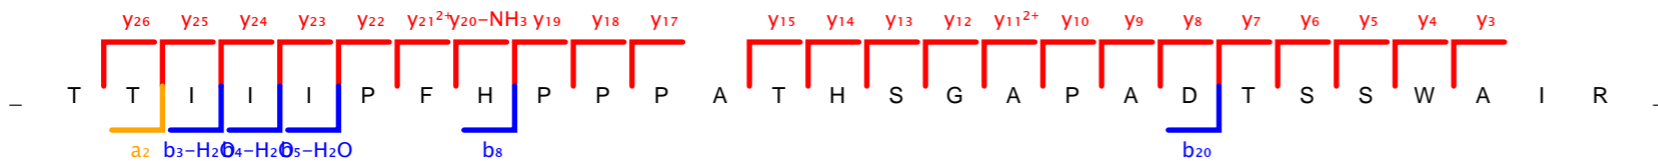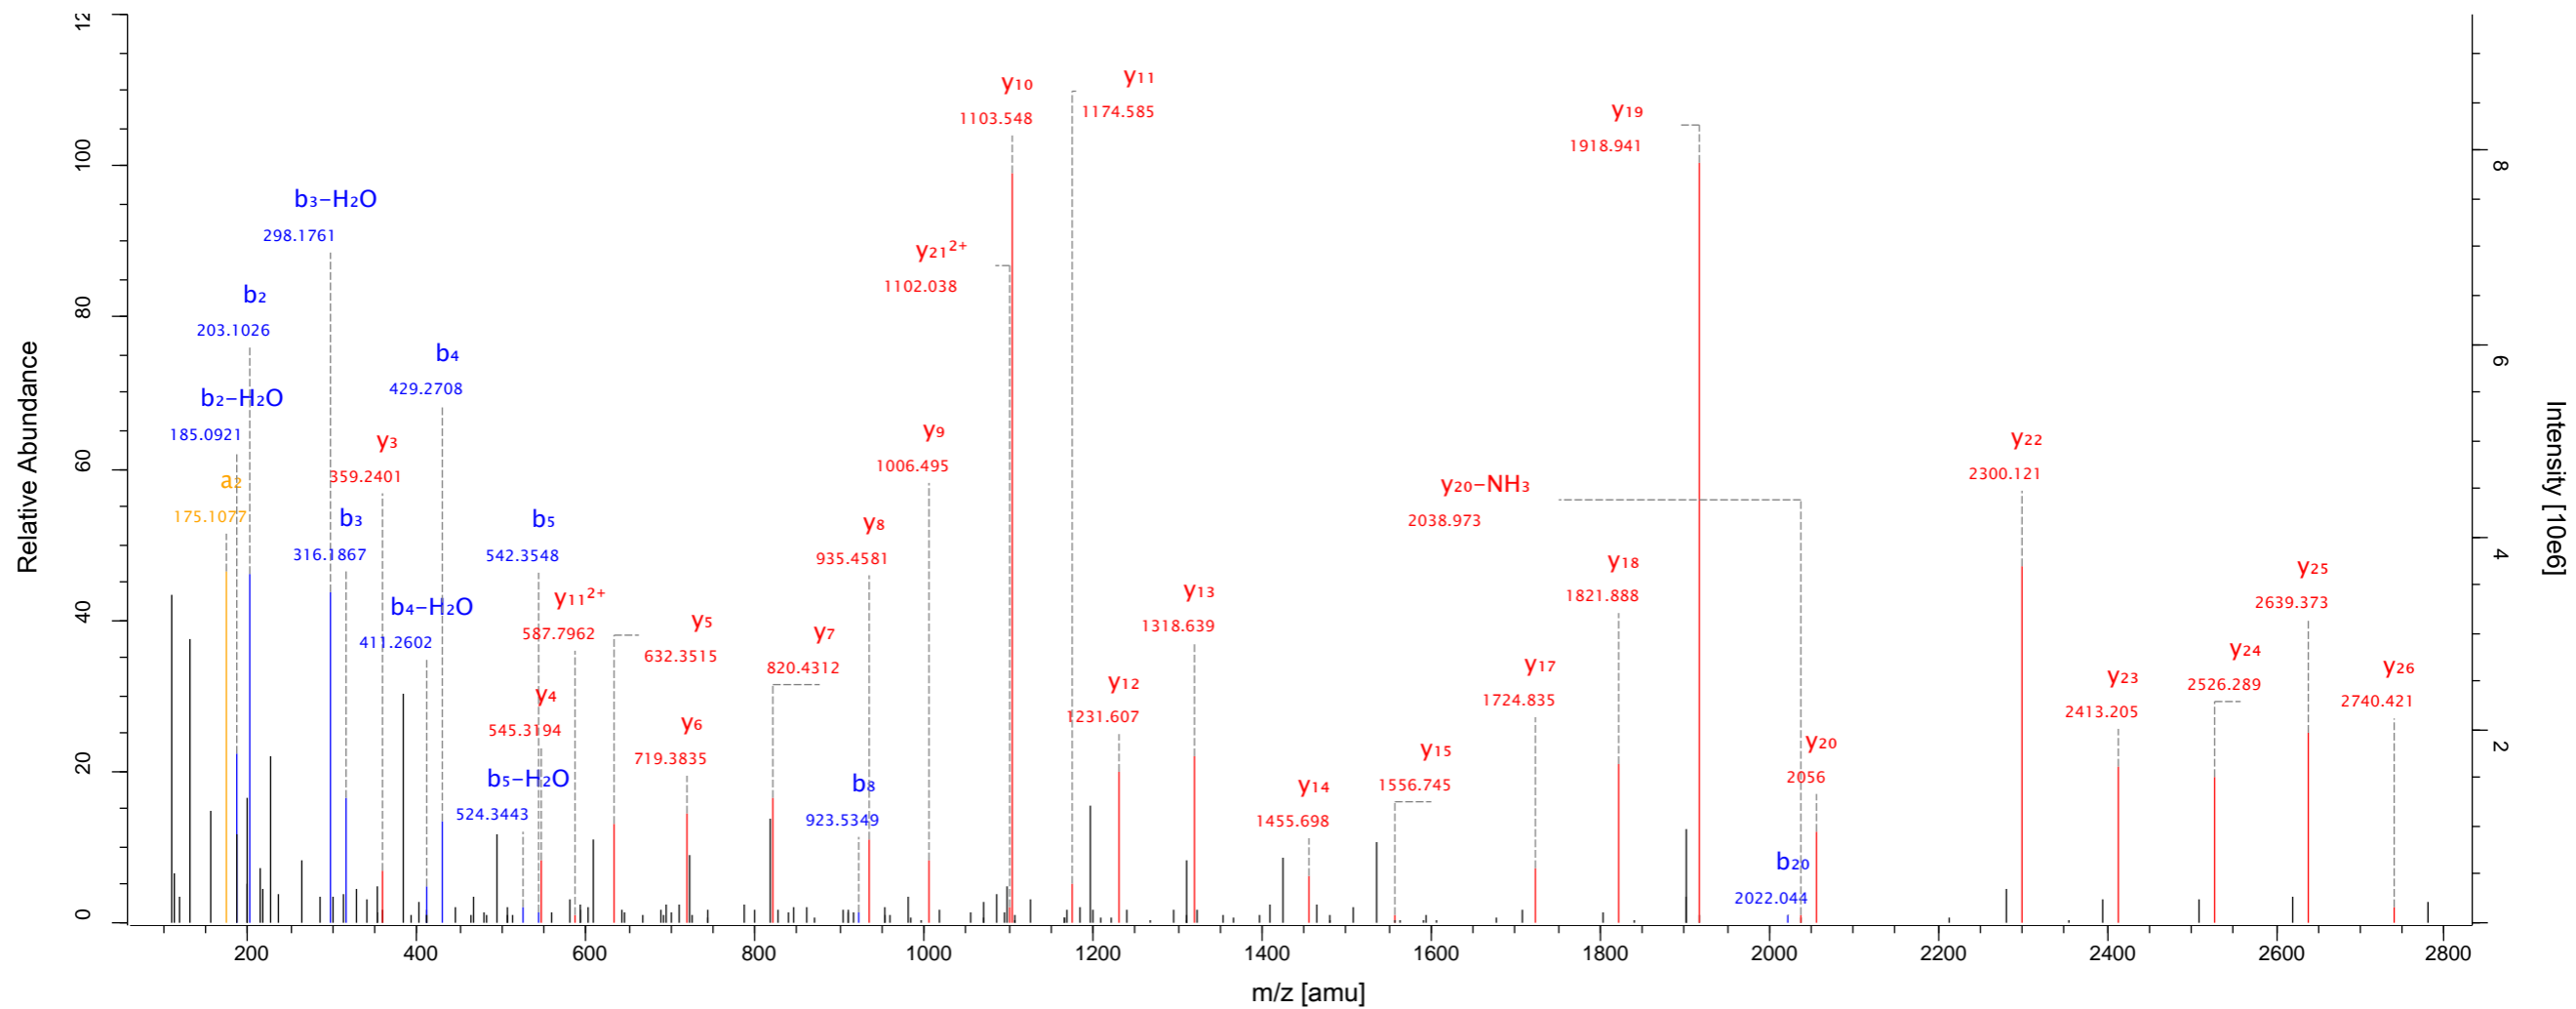

Raw file: 20111212\_EXQ5\_AnMi\_QC\_HCMVp1\_2  
Scan number: 43790  
Protein: ORFL6C - NC\_006273.2[4179,4439]- <unknown description>  
Peptide score: 78.49  
Method: FTMS; HCD

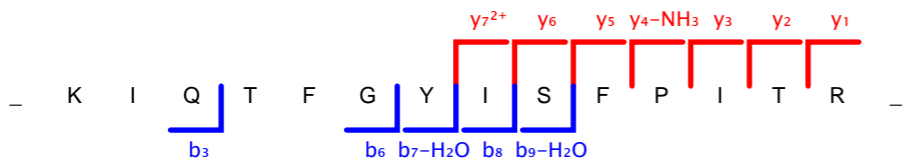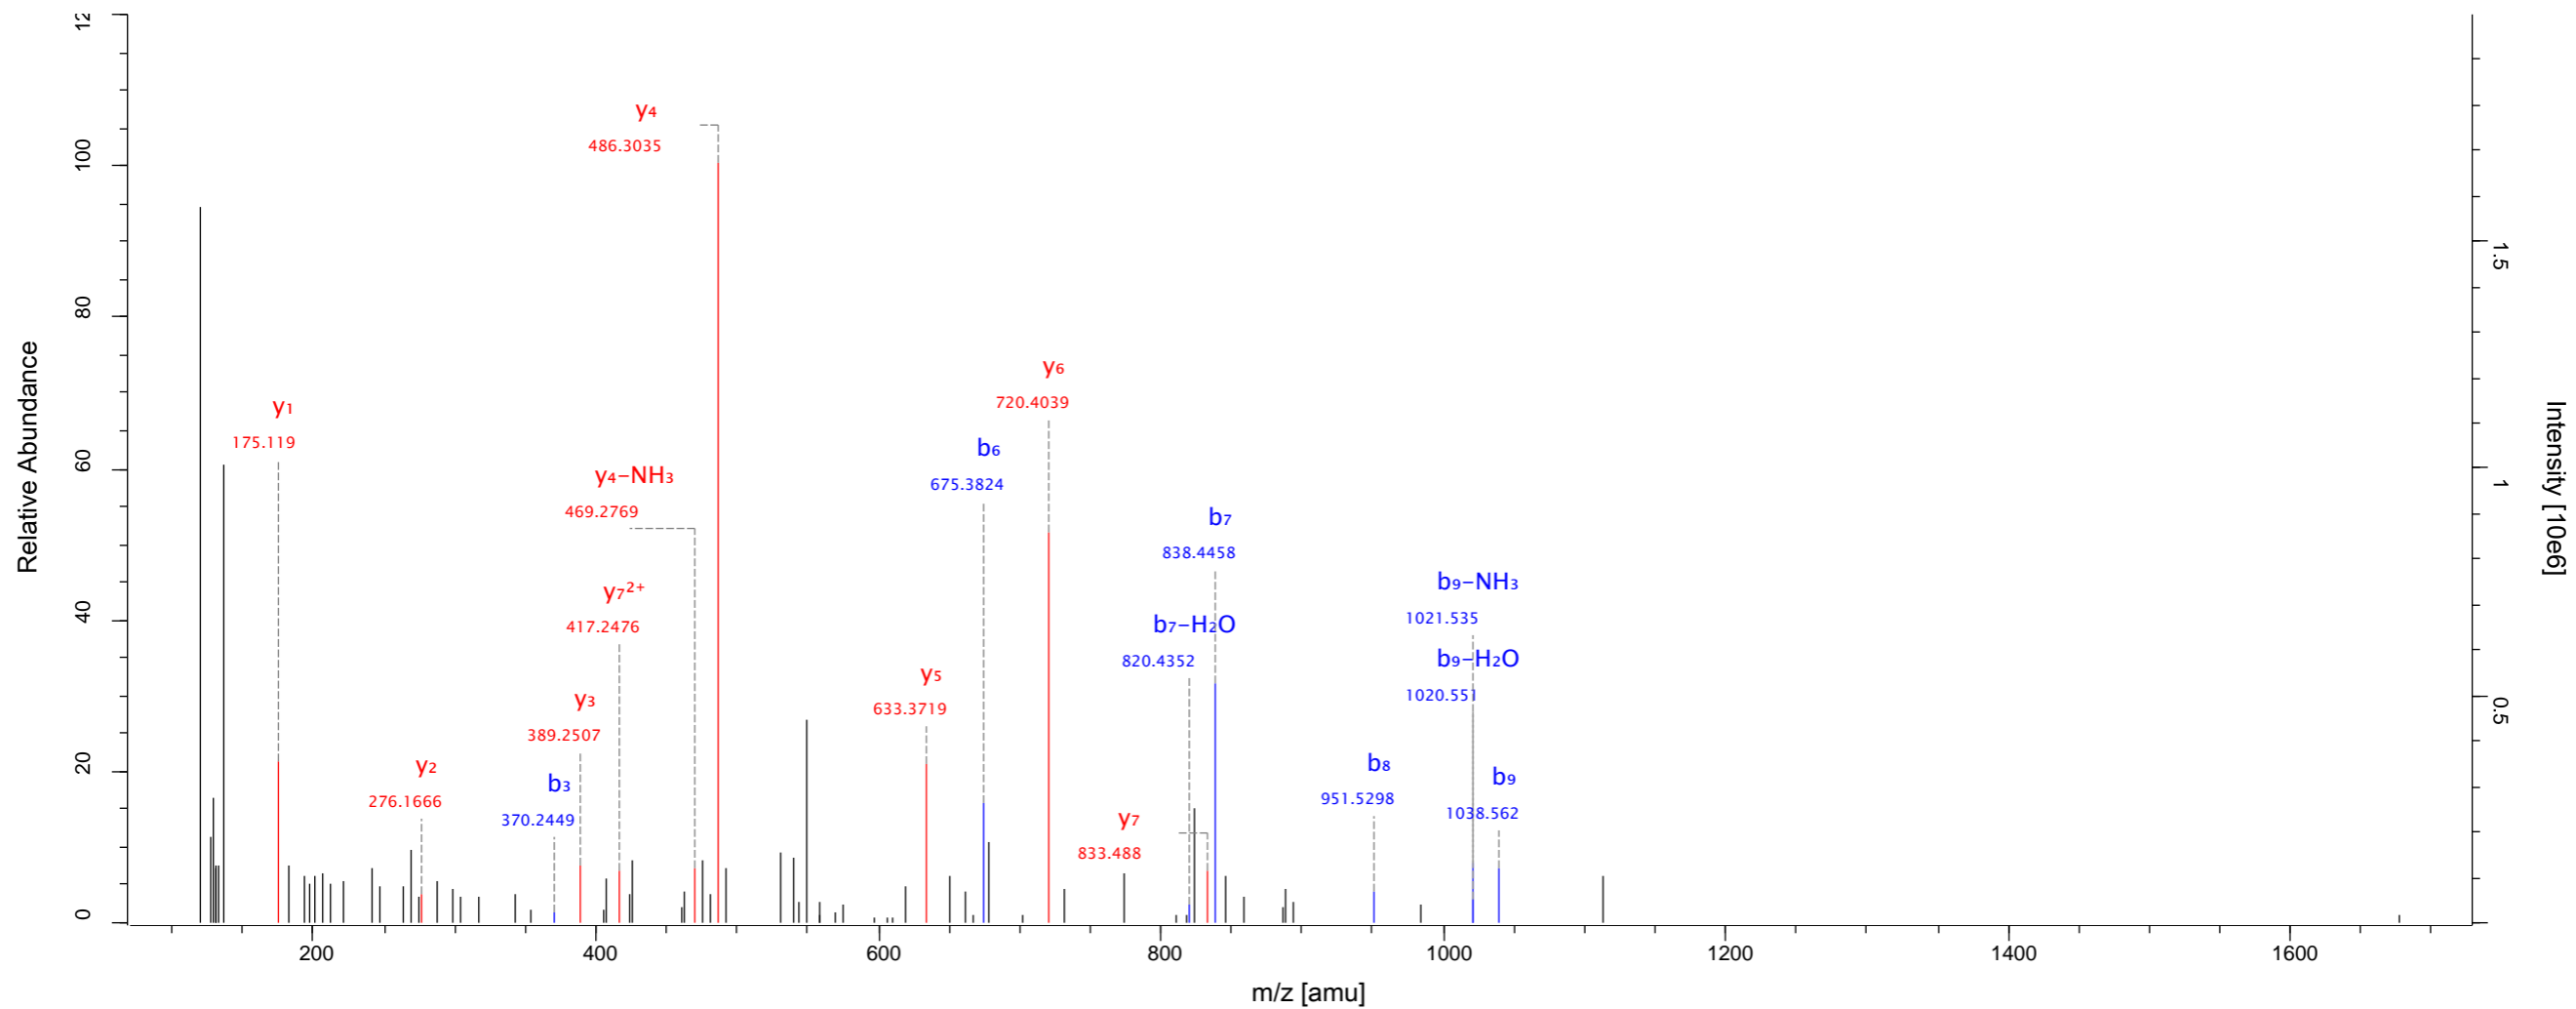

Raw file: 20111212\_EXQ5\_AnMi\_QC\_HCMVp1\_2  
Scan number: 45254  
Protein: ORFL174C.iORF2 - NC\_006273.2[106396,106770]- <unknown description>  
Peptide score: 106.13  
Method: FTMS; HCD

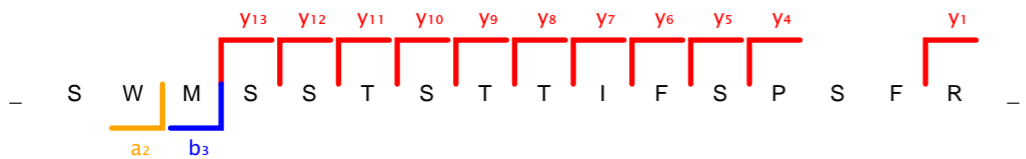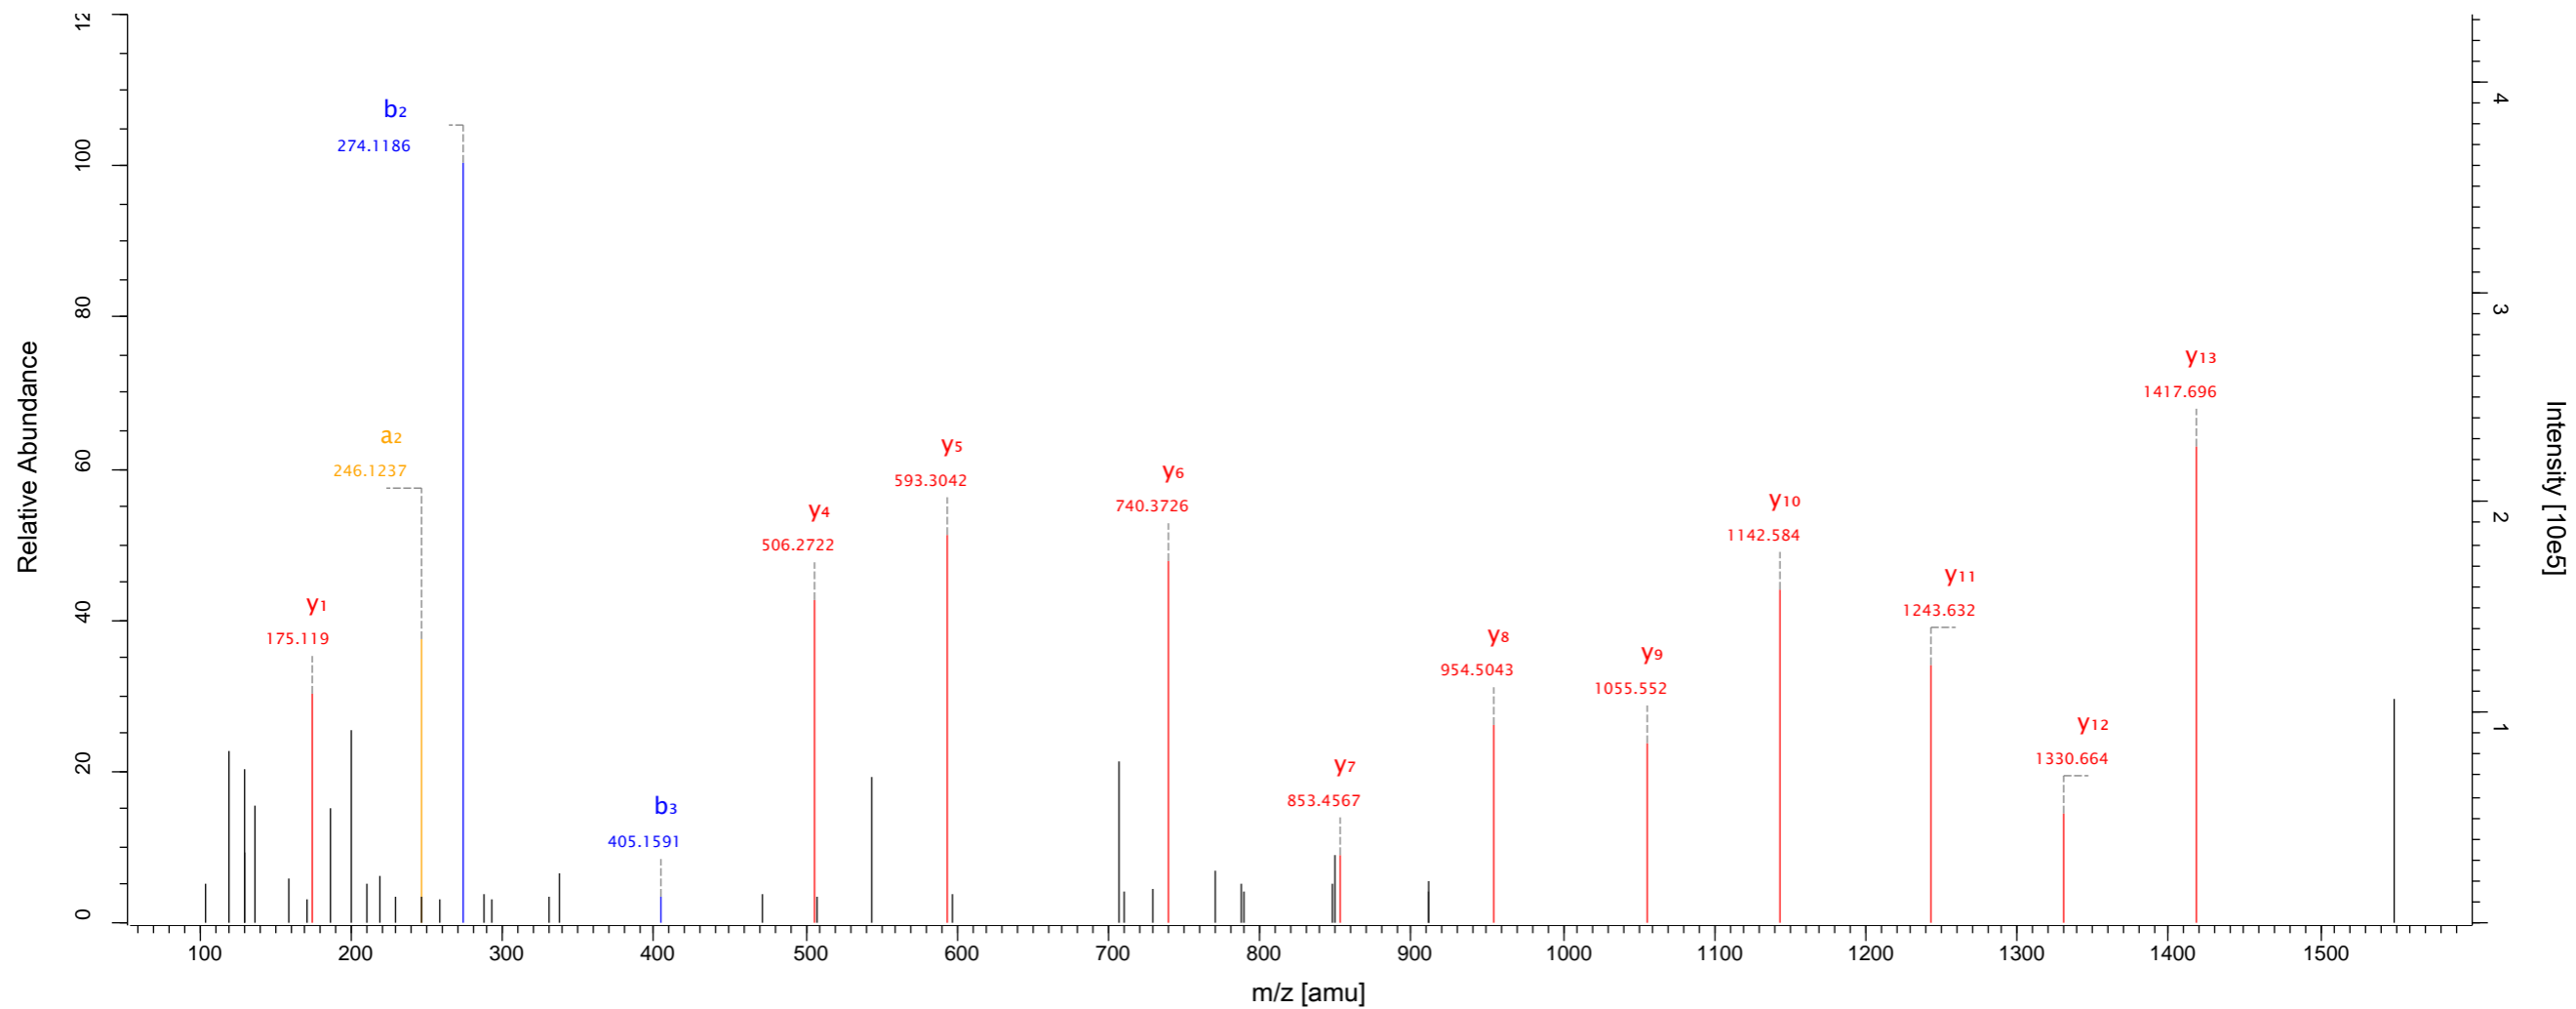

Raw file: 20111212\_EXQ5\_AnMi\_QC\_HCMVp1\_2  
 Scan number: 46790  
 Protein: ORFL174C.iORF2 - NC\_006273.2[106396,106770]- <unknown description>  
 Peptide score: 151.79  
 Method: FTMS; HCD

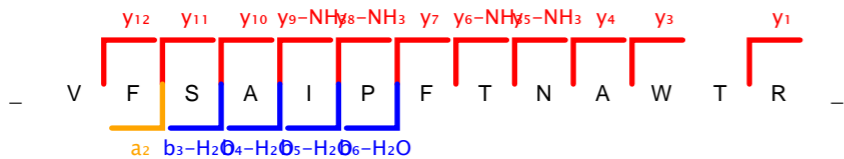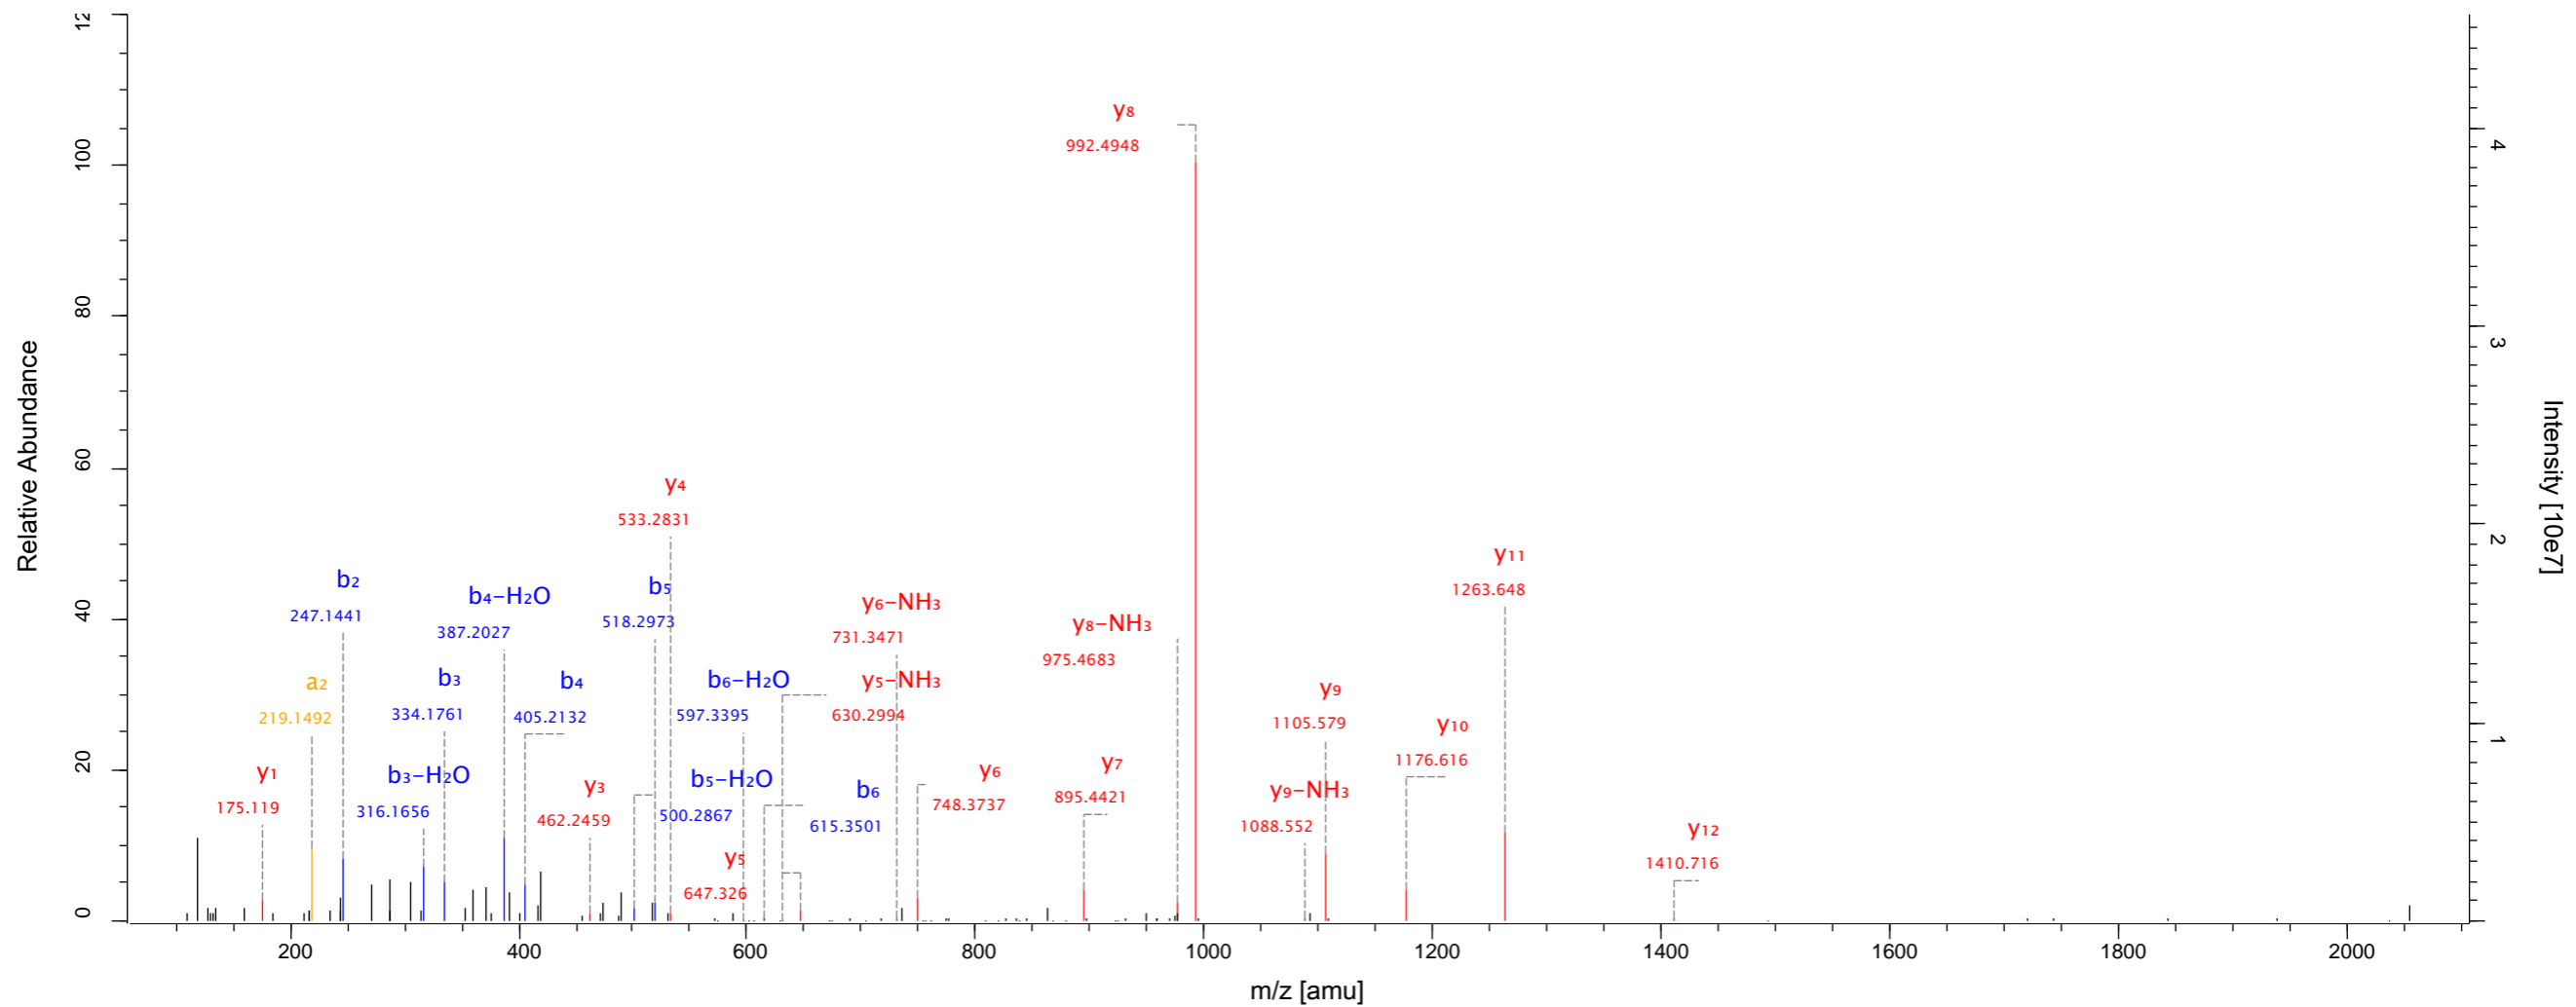

Raw file: 20111212\_EXQ5\_AnMi\_QC\_HCMVp1\_2  
Scan number: 4937  
Protein: ORFL121C - NC\_006273.2[65579,65851]- <unknown description>  
Peptide score: 57.79  
Method: FTMS; HCD

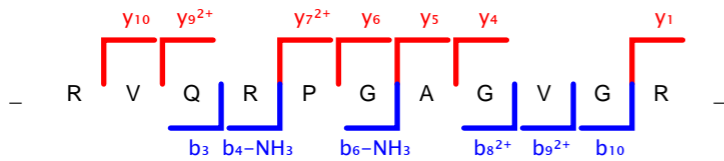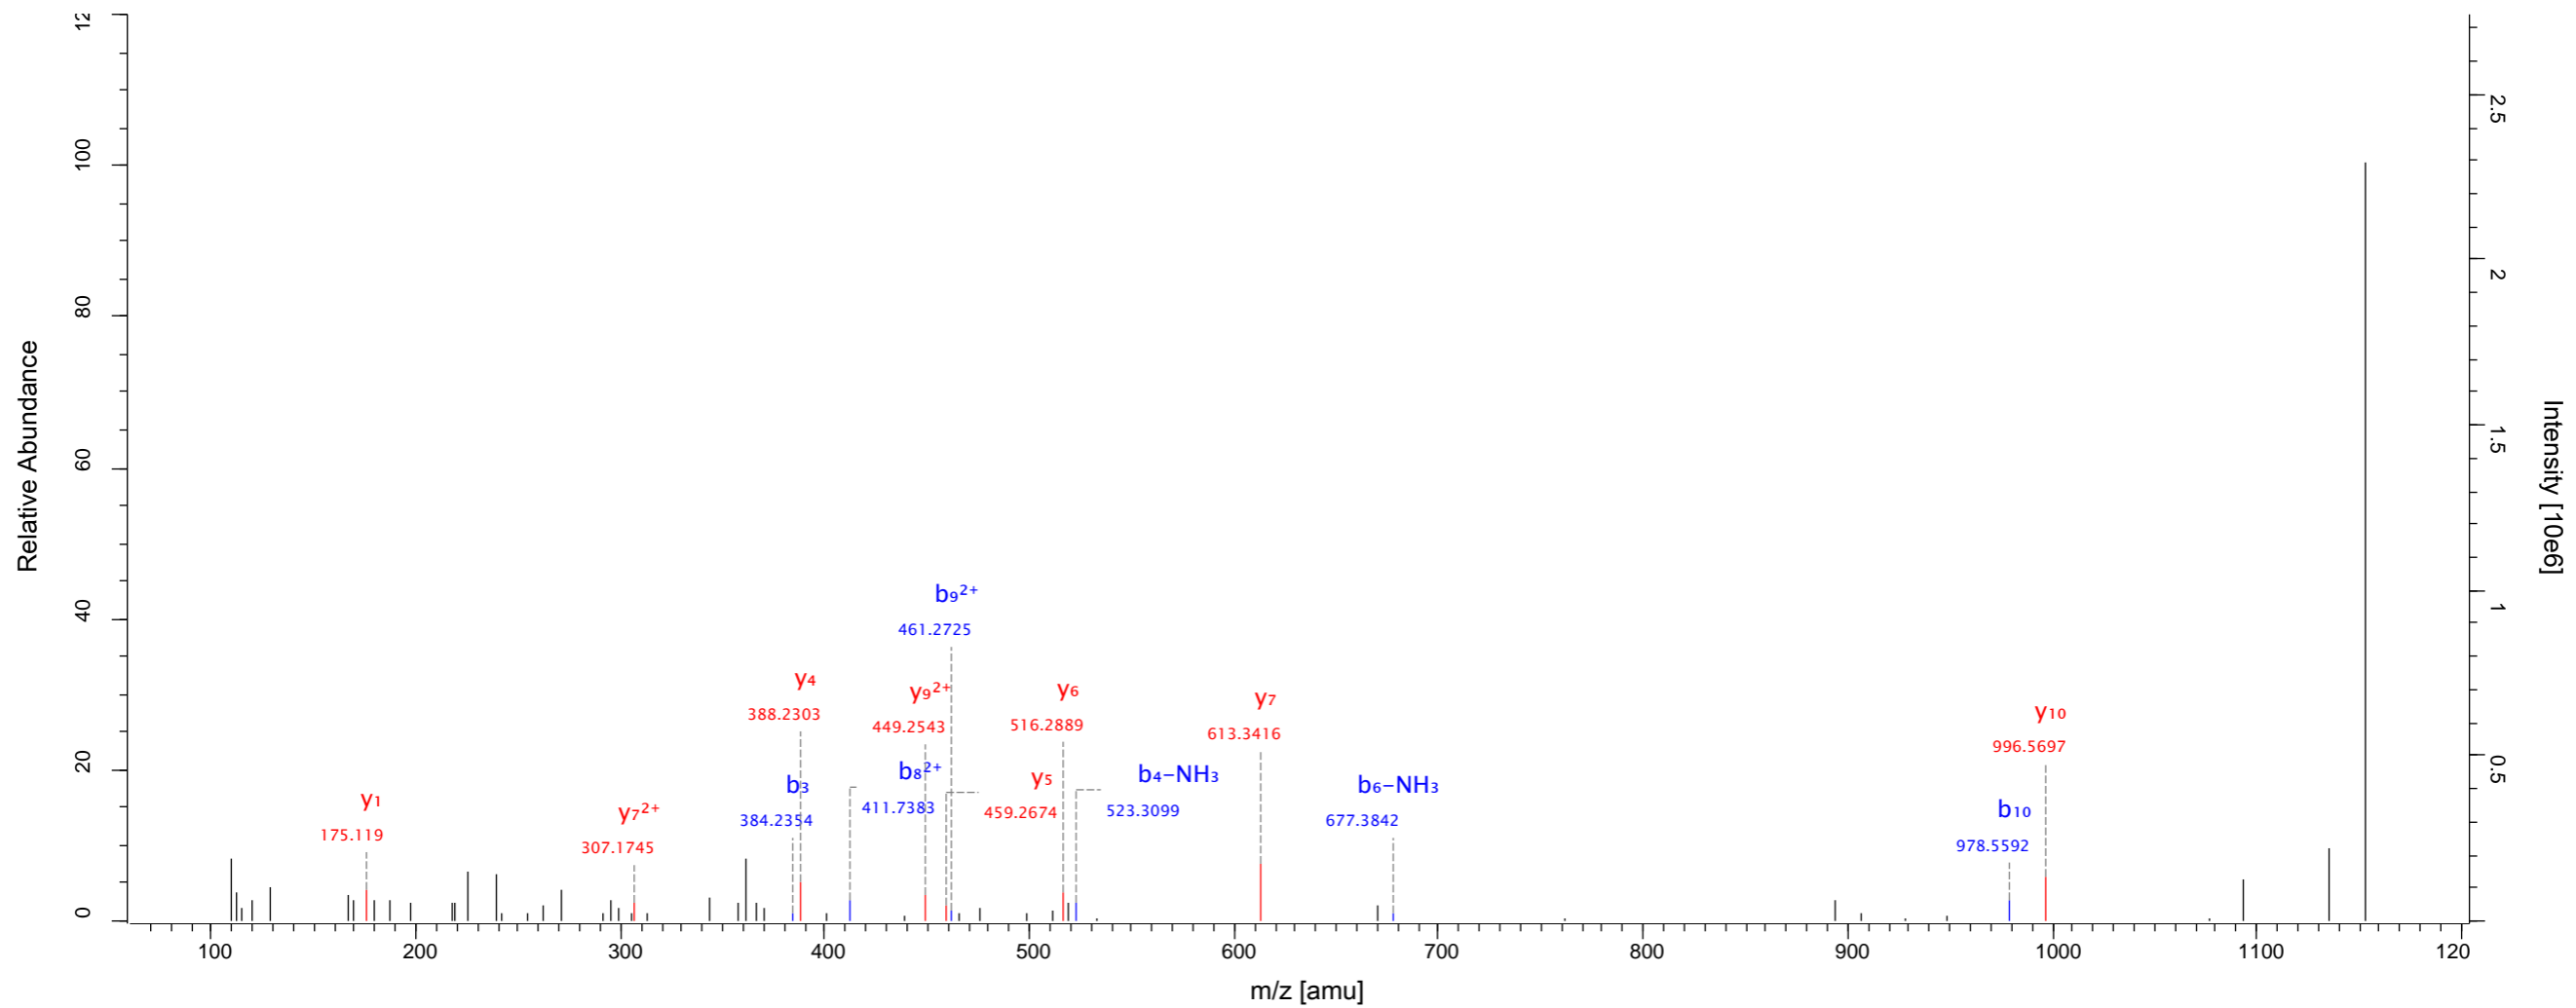

Raw file: 20111212\_EXQ5\_AnMi\_QC\_HCMVp1\_2  
 Scan number: 6061  
 Protein: ORFL106C - NC\_006273.2[53935,54294]- <unknown description>  
 Peptide score: 128.17  
 Method: FTMS; HCD

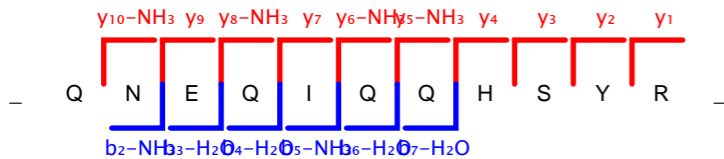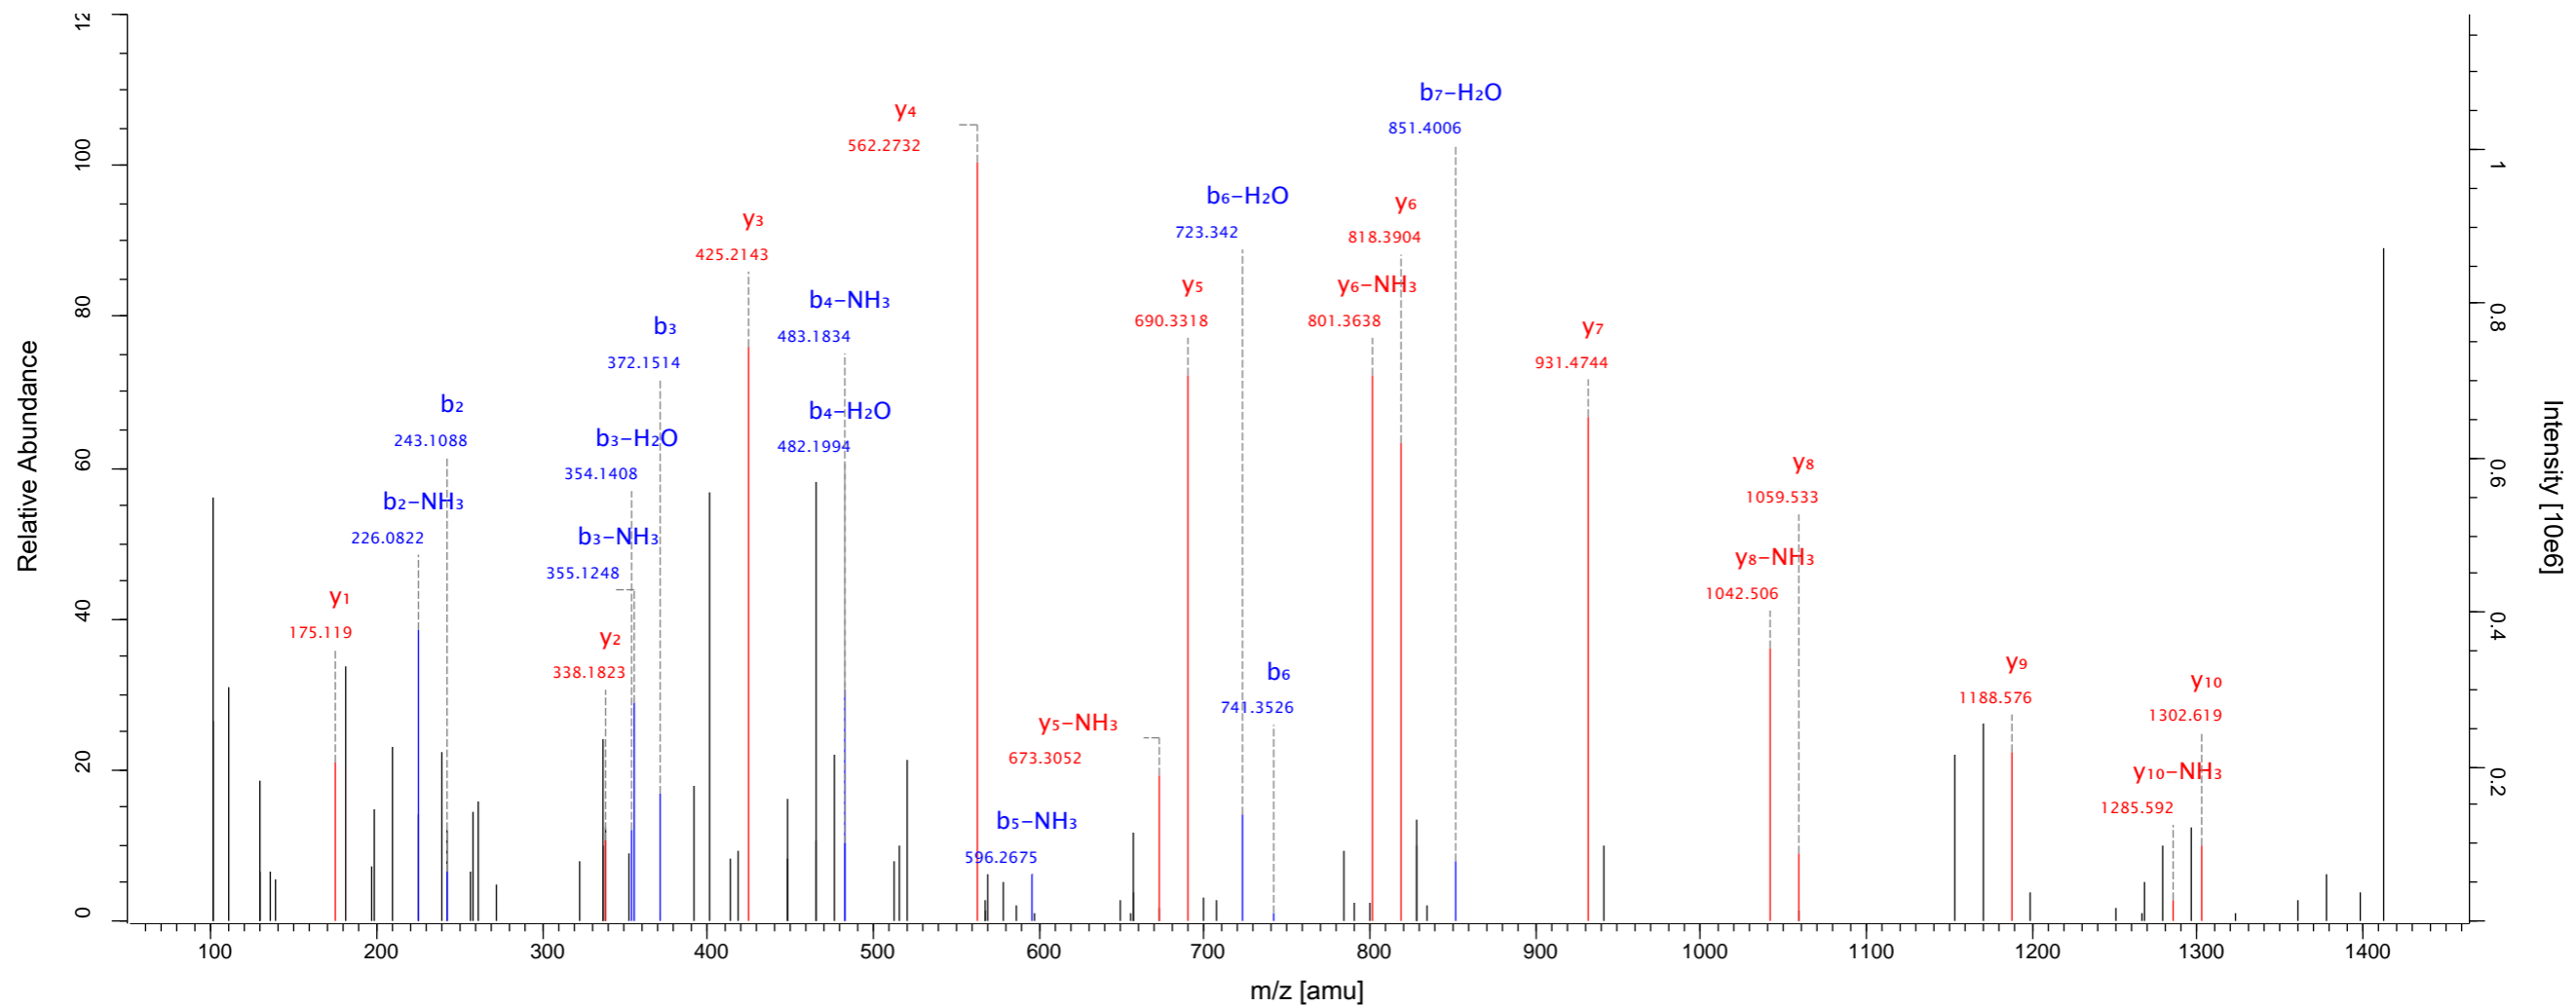

Raw file: 20111212\_EXQ5\_AnMi\_QC\_HCMVp1\_2  
Scan number: 7468  
Protein: ORFL47W.iORF1 + NC\_006273.2[21305,21601]+ <unknown description>  
Peptide score: 101.93  
Method: FTMS; HCD

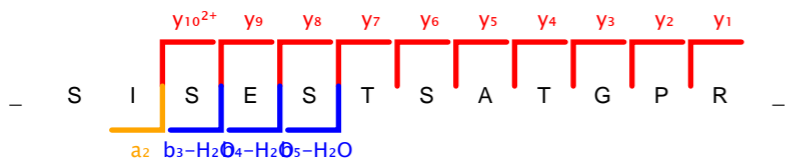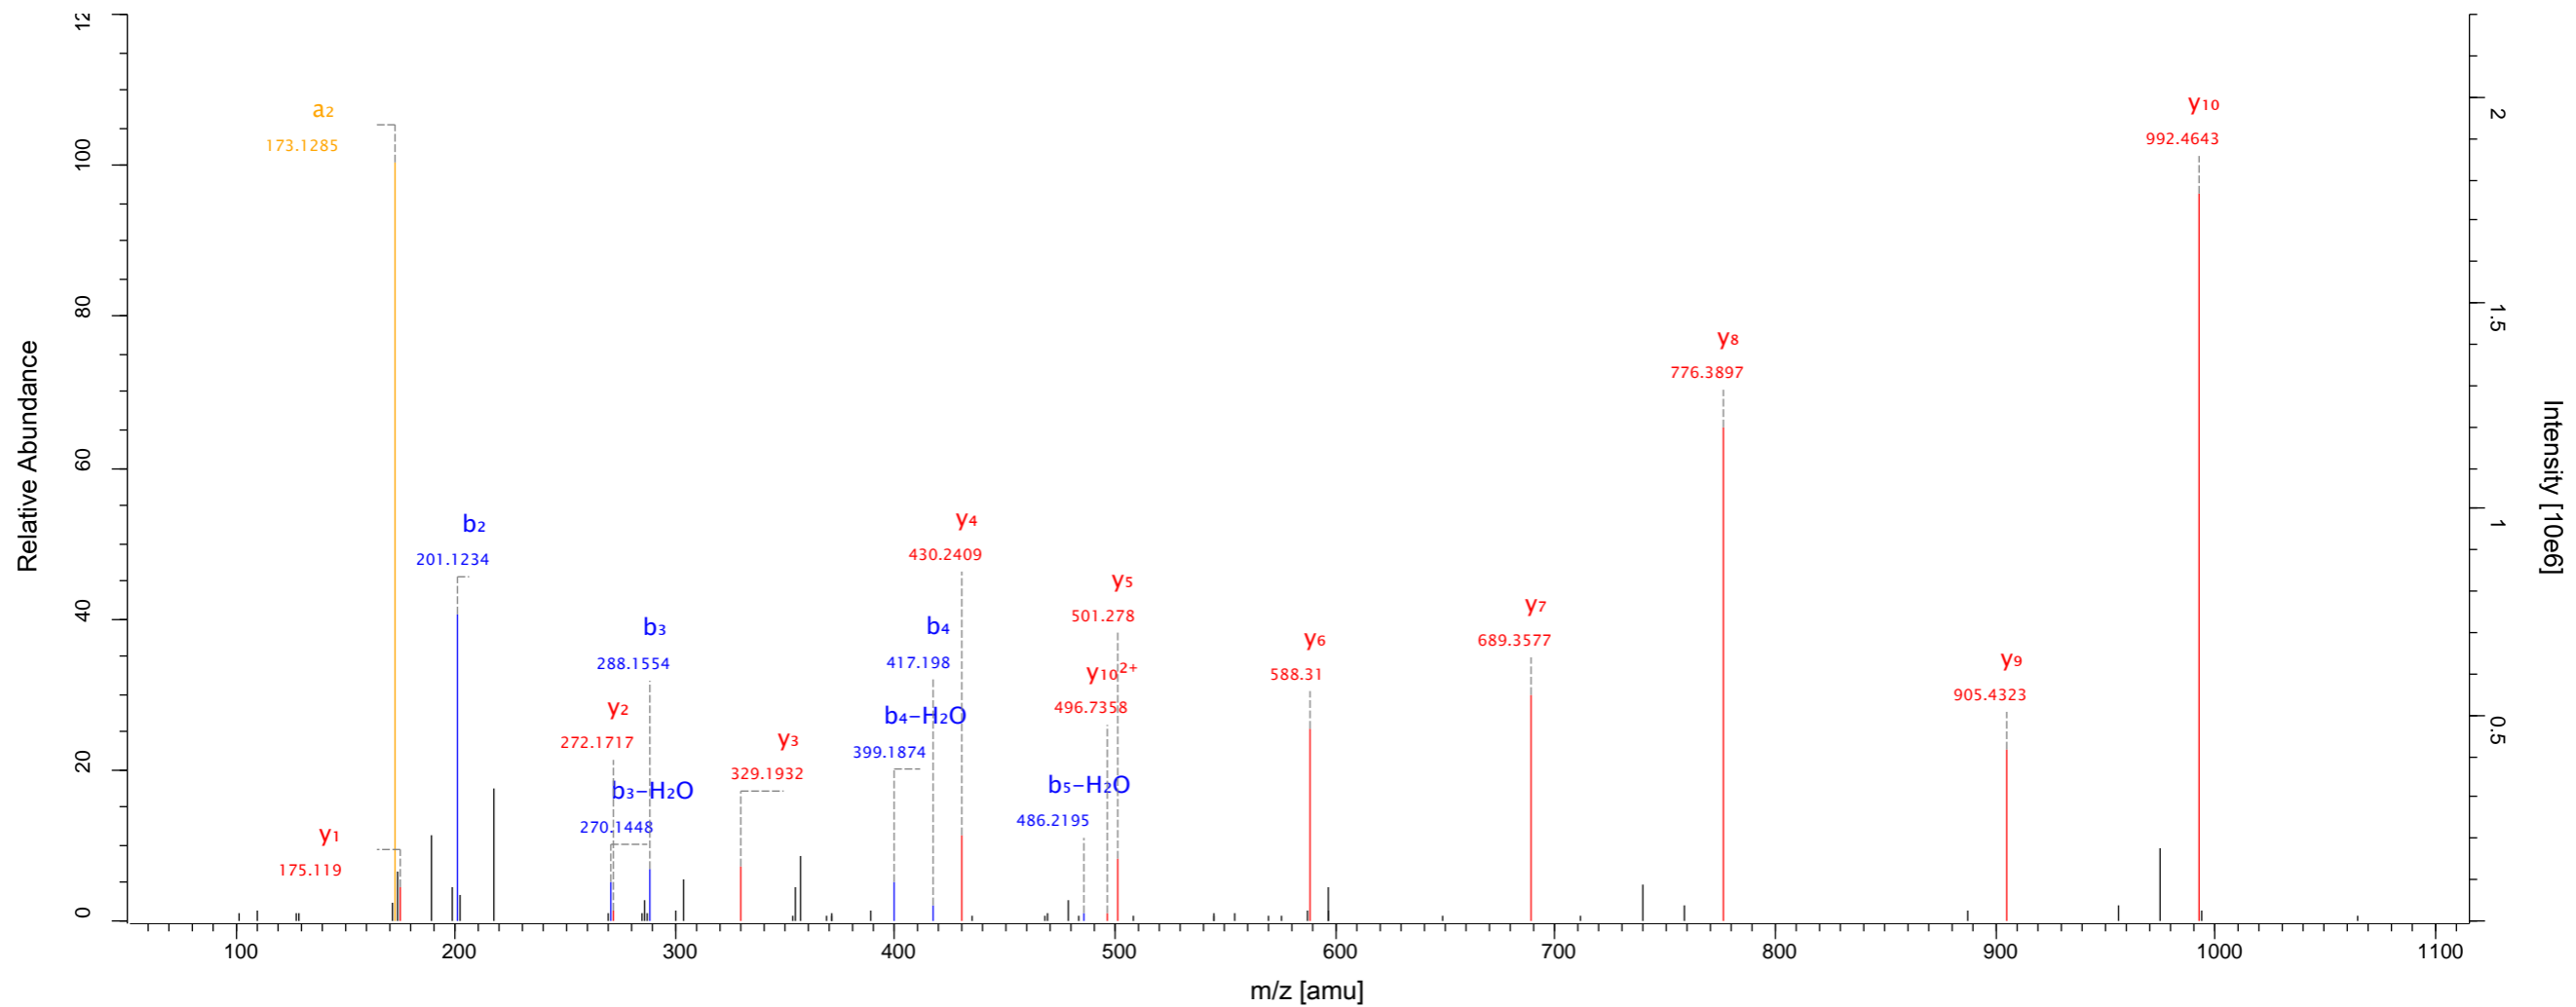

Raw file: 20111212\_EXQ5\_AnMi\_QC\_HCMVp11\_2  
Scan number: 7754  
Protein: ORFL174C.iORF1 - NC\_006273.2[106302,106568]- <unknown description>  
Peptide score: 40.73  
Method: FTMS; HCD

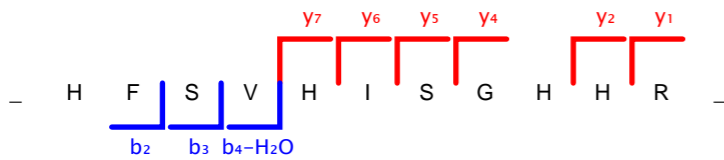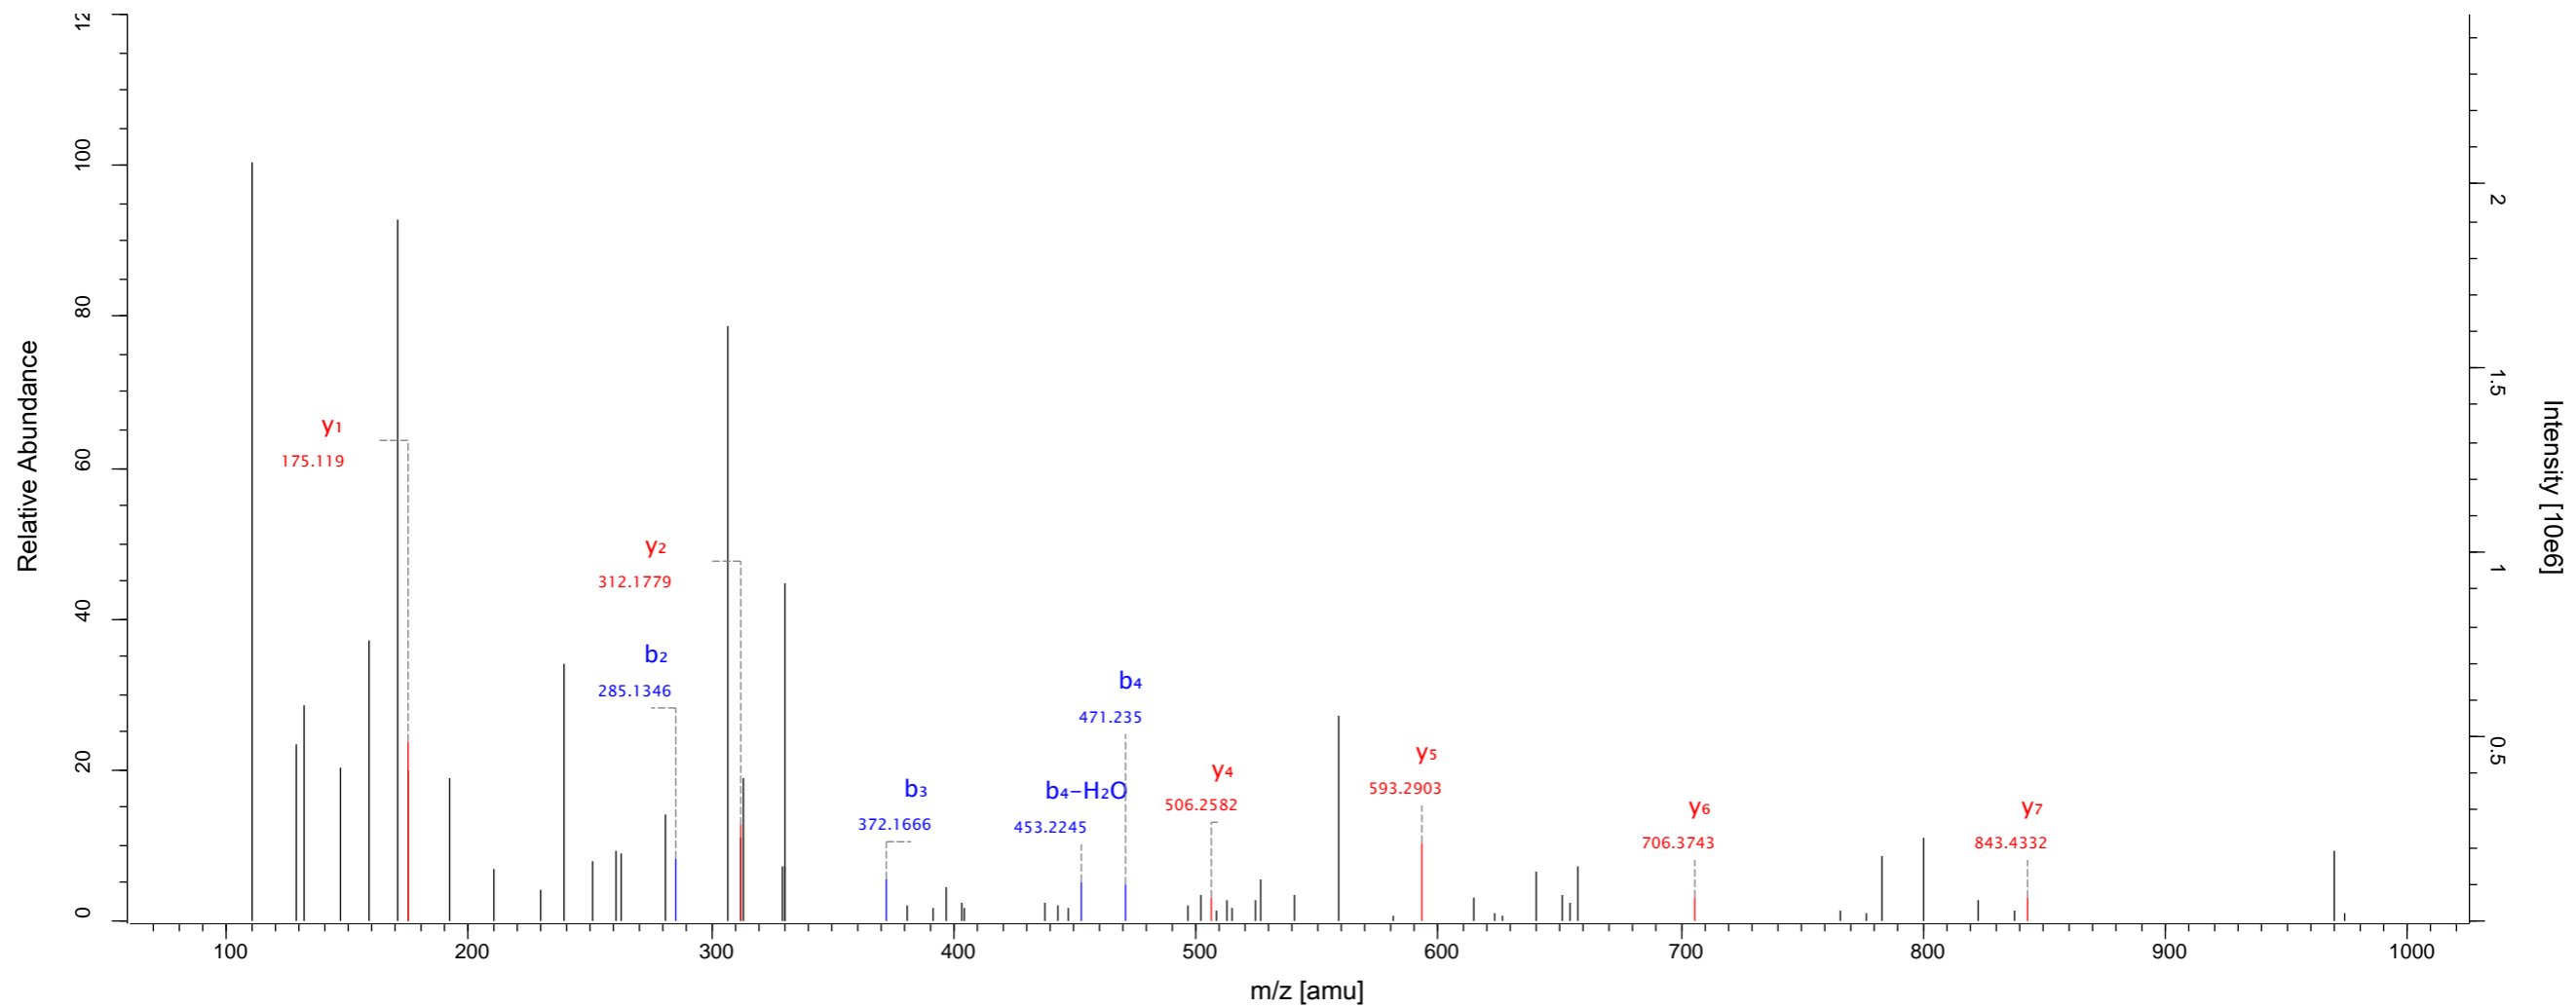



Raw file: 20111212\_EXQ5\_AnMi\_QC\_HCMVp1\_2  
Scan number: 8677  
Protein: ORFL26W + NC\_006273.2[12923,13093]+ <unknown description>  
Peptide score: 142.92  
Method: FTMS; HCD

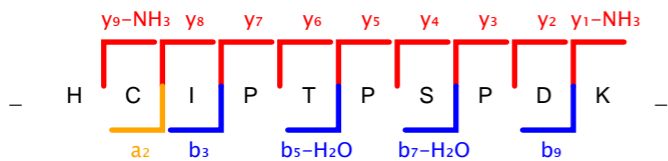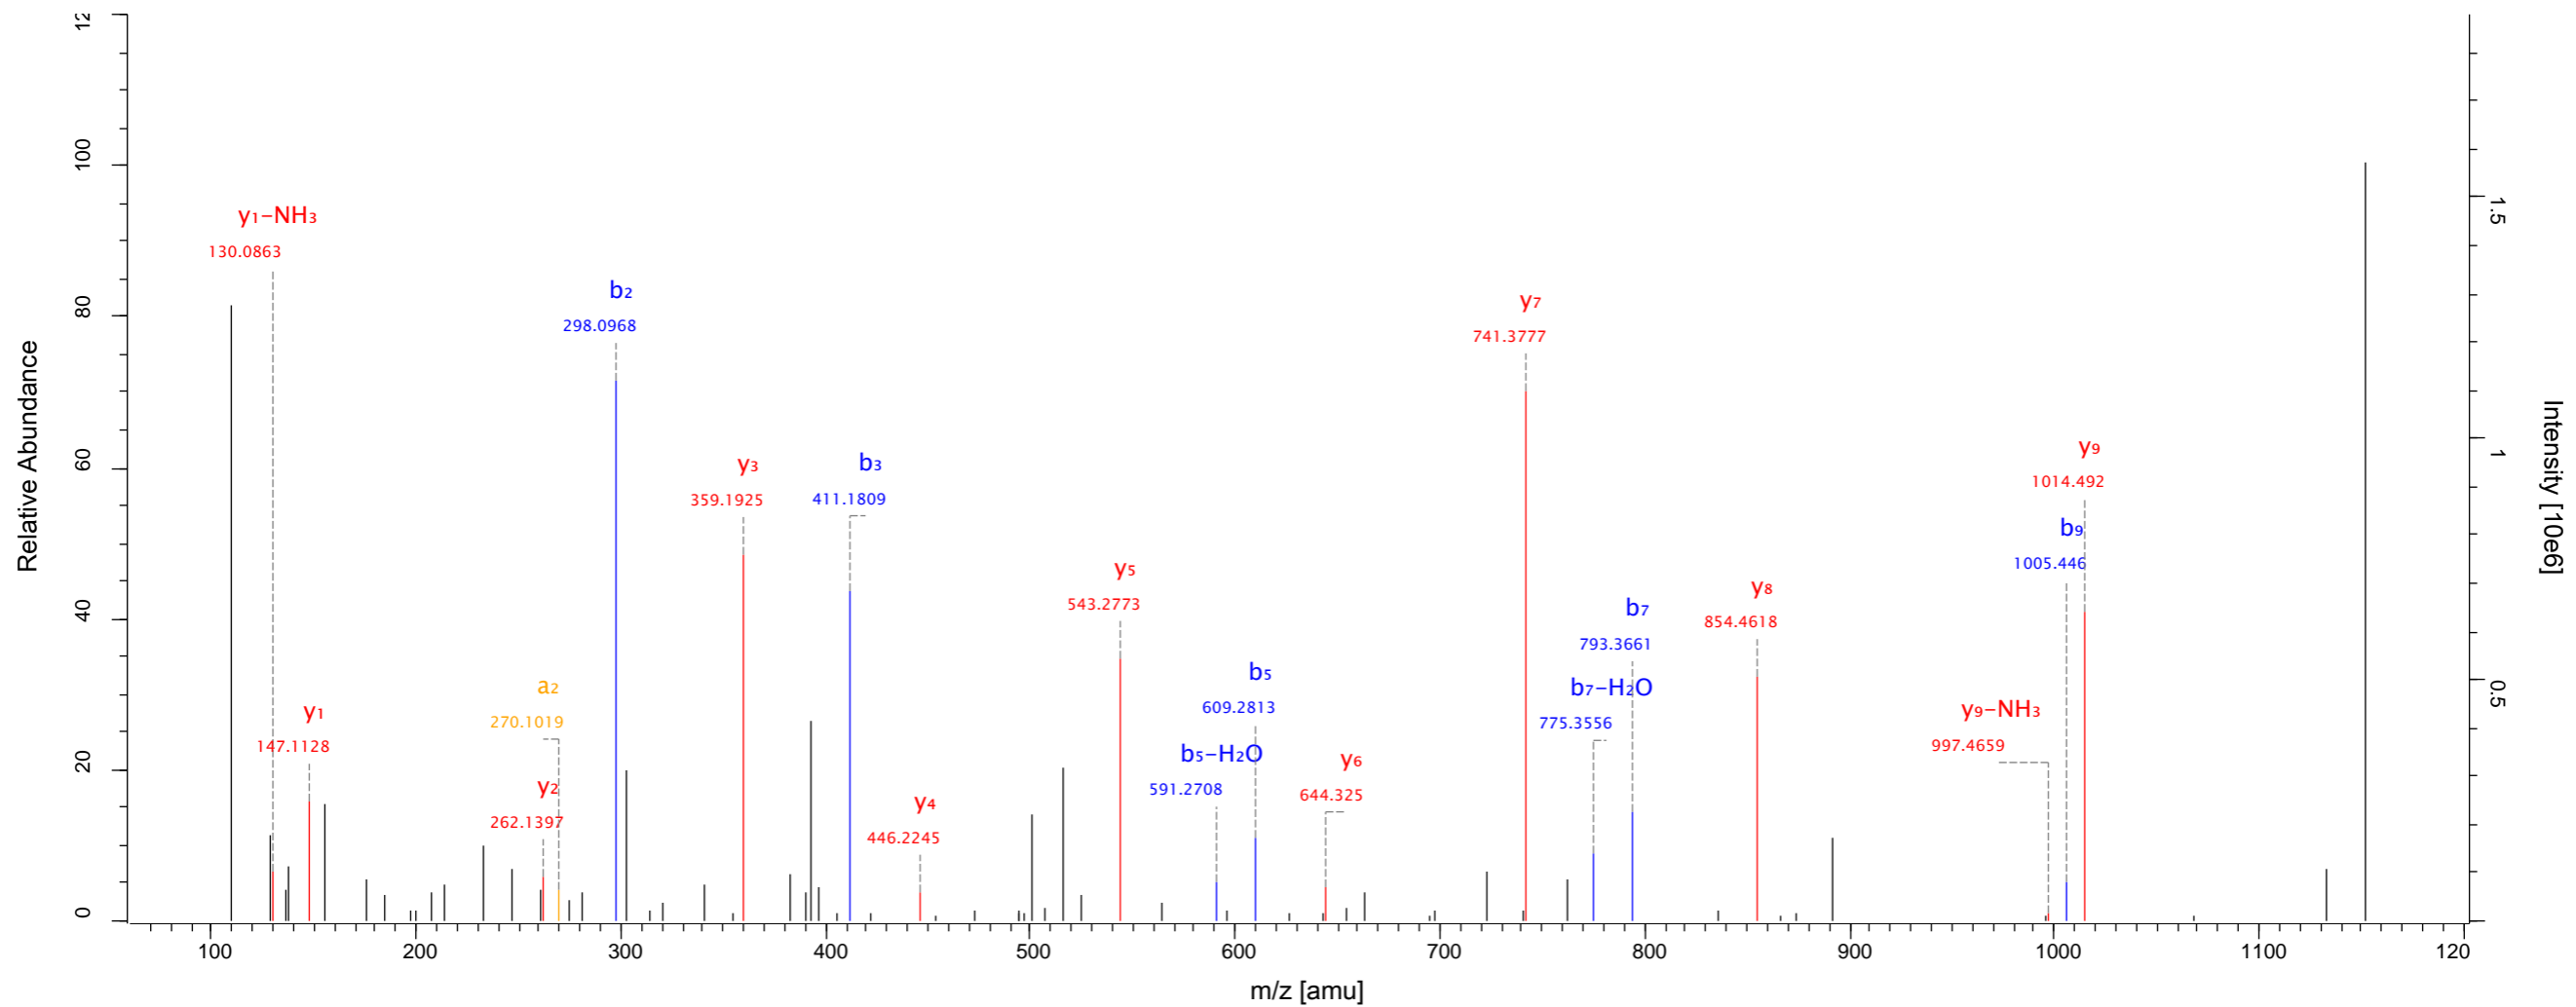

Raw file: 20111212\_EXQ5\_AnMi\_QC\_HCMVp1\_2  
Scan number: 8842  
Protein: ORFL73C - NC\_006273.2[30581,30946]- <unknown description>  
Peptide score: 95.5  
Method: FTMS; HCD

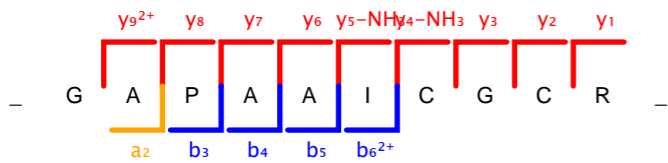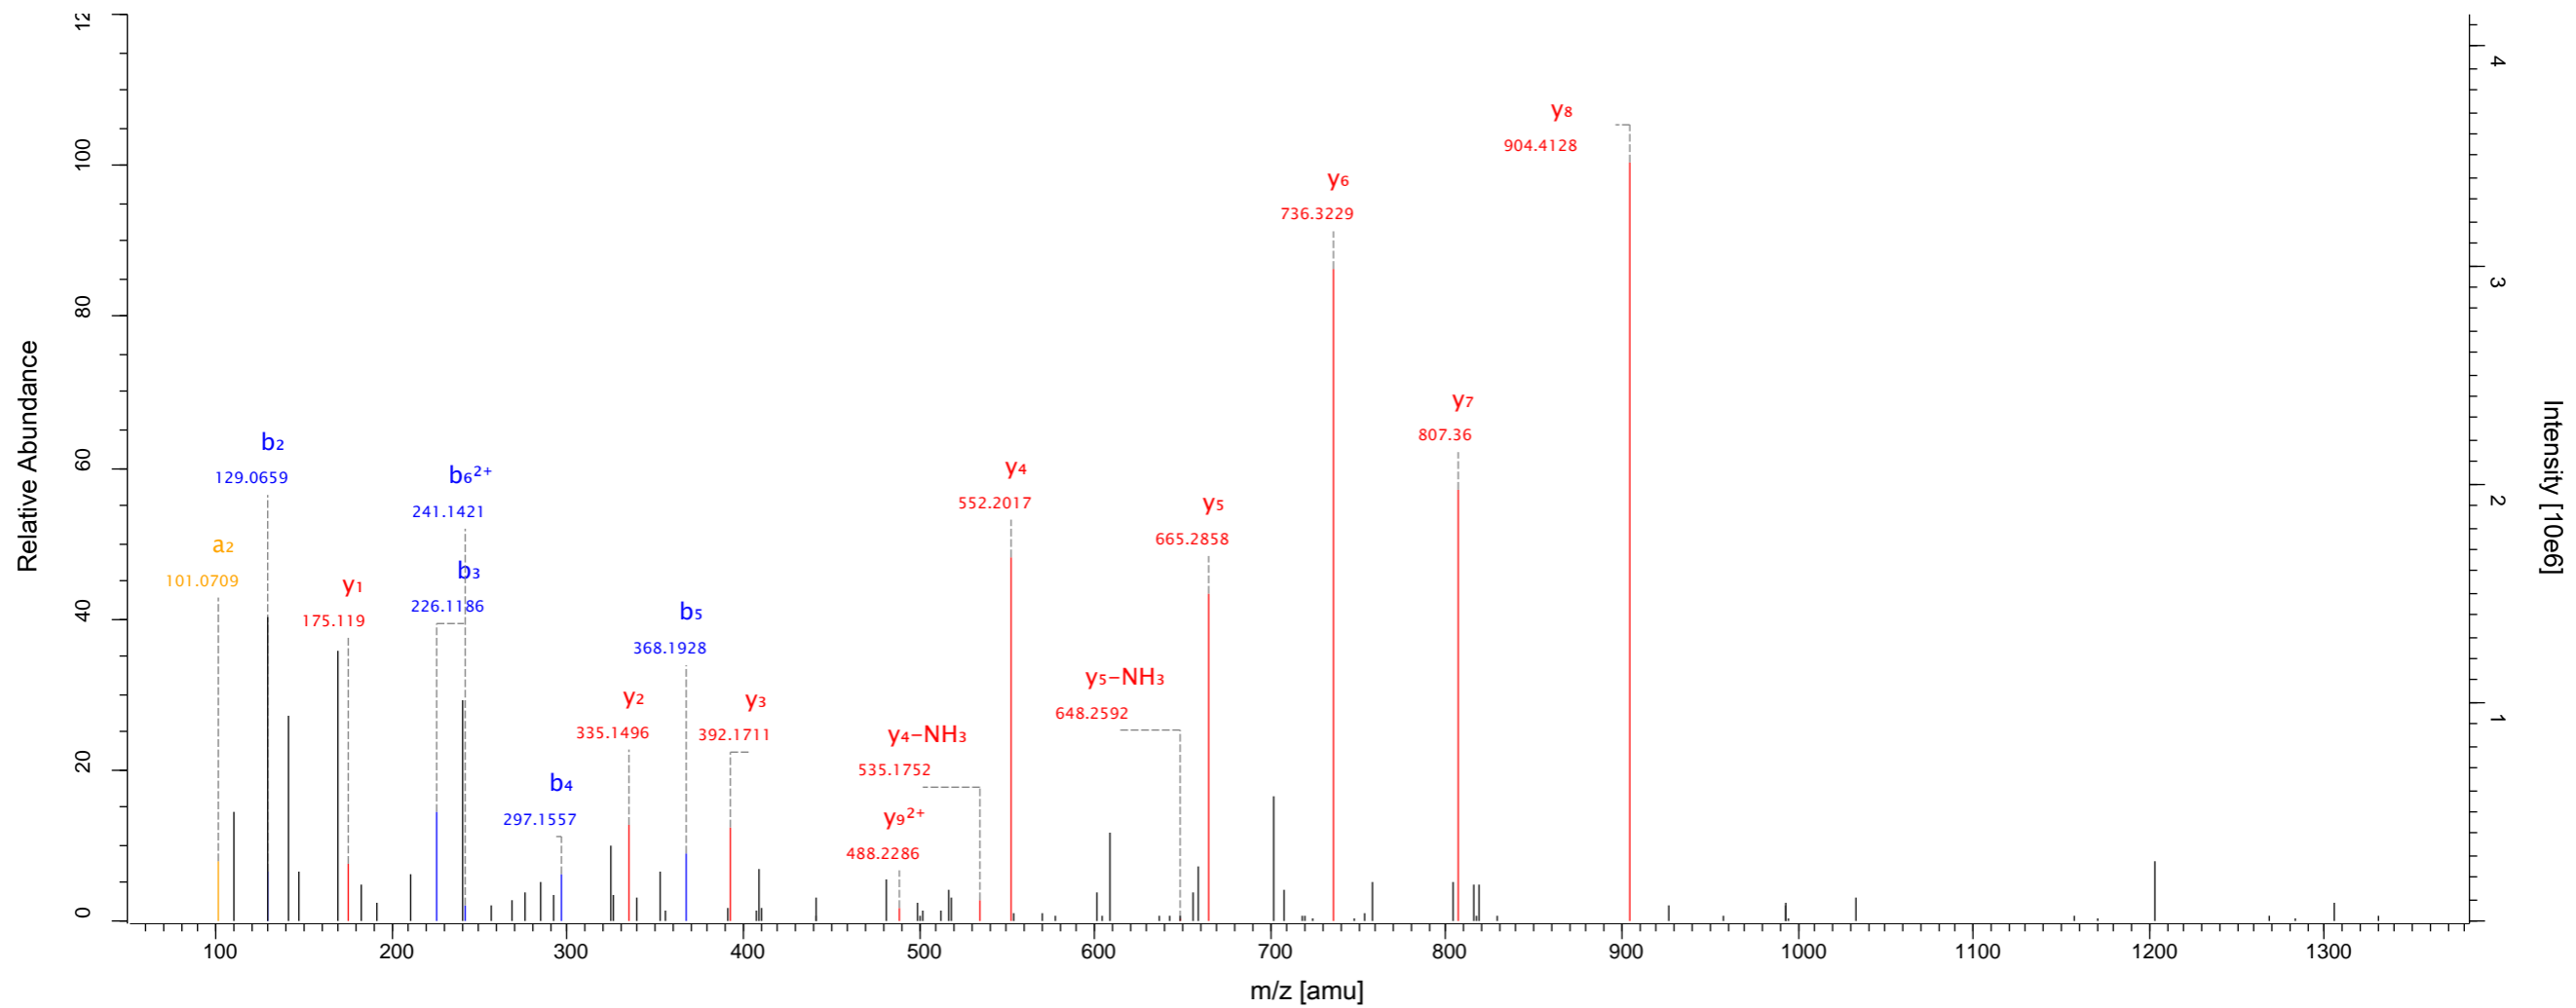

Raw file: 20111212\_EXQ5\_AnMi\_QC\_HCMVp1\_2  
 Scan number: 9249  
 Protein: ORFS359W + NC\_006273.2[221986,222303]+ <unknown description>  
 Peptide score: 175.65  
 Method: FTMS; HCD

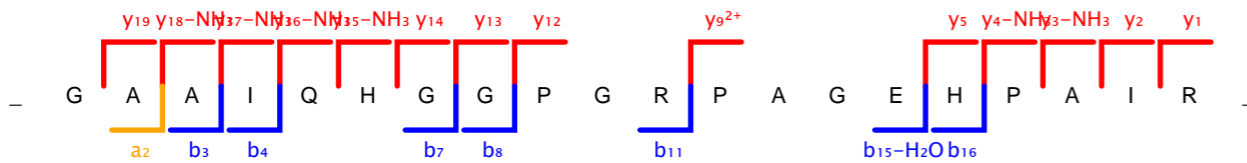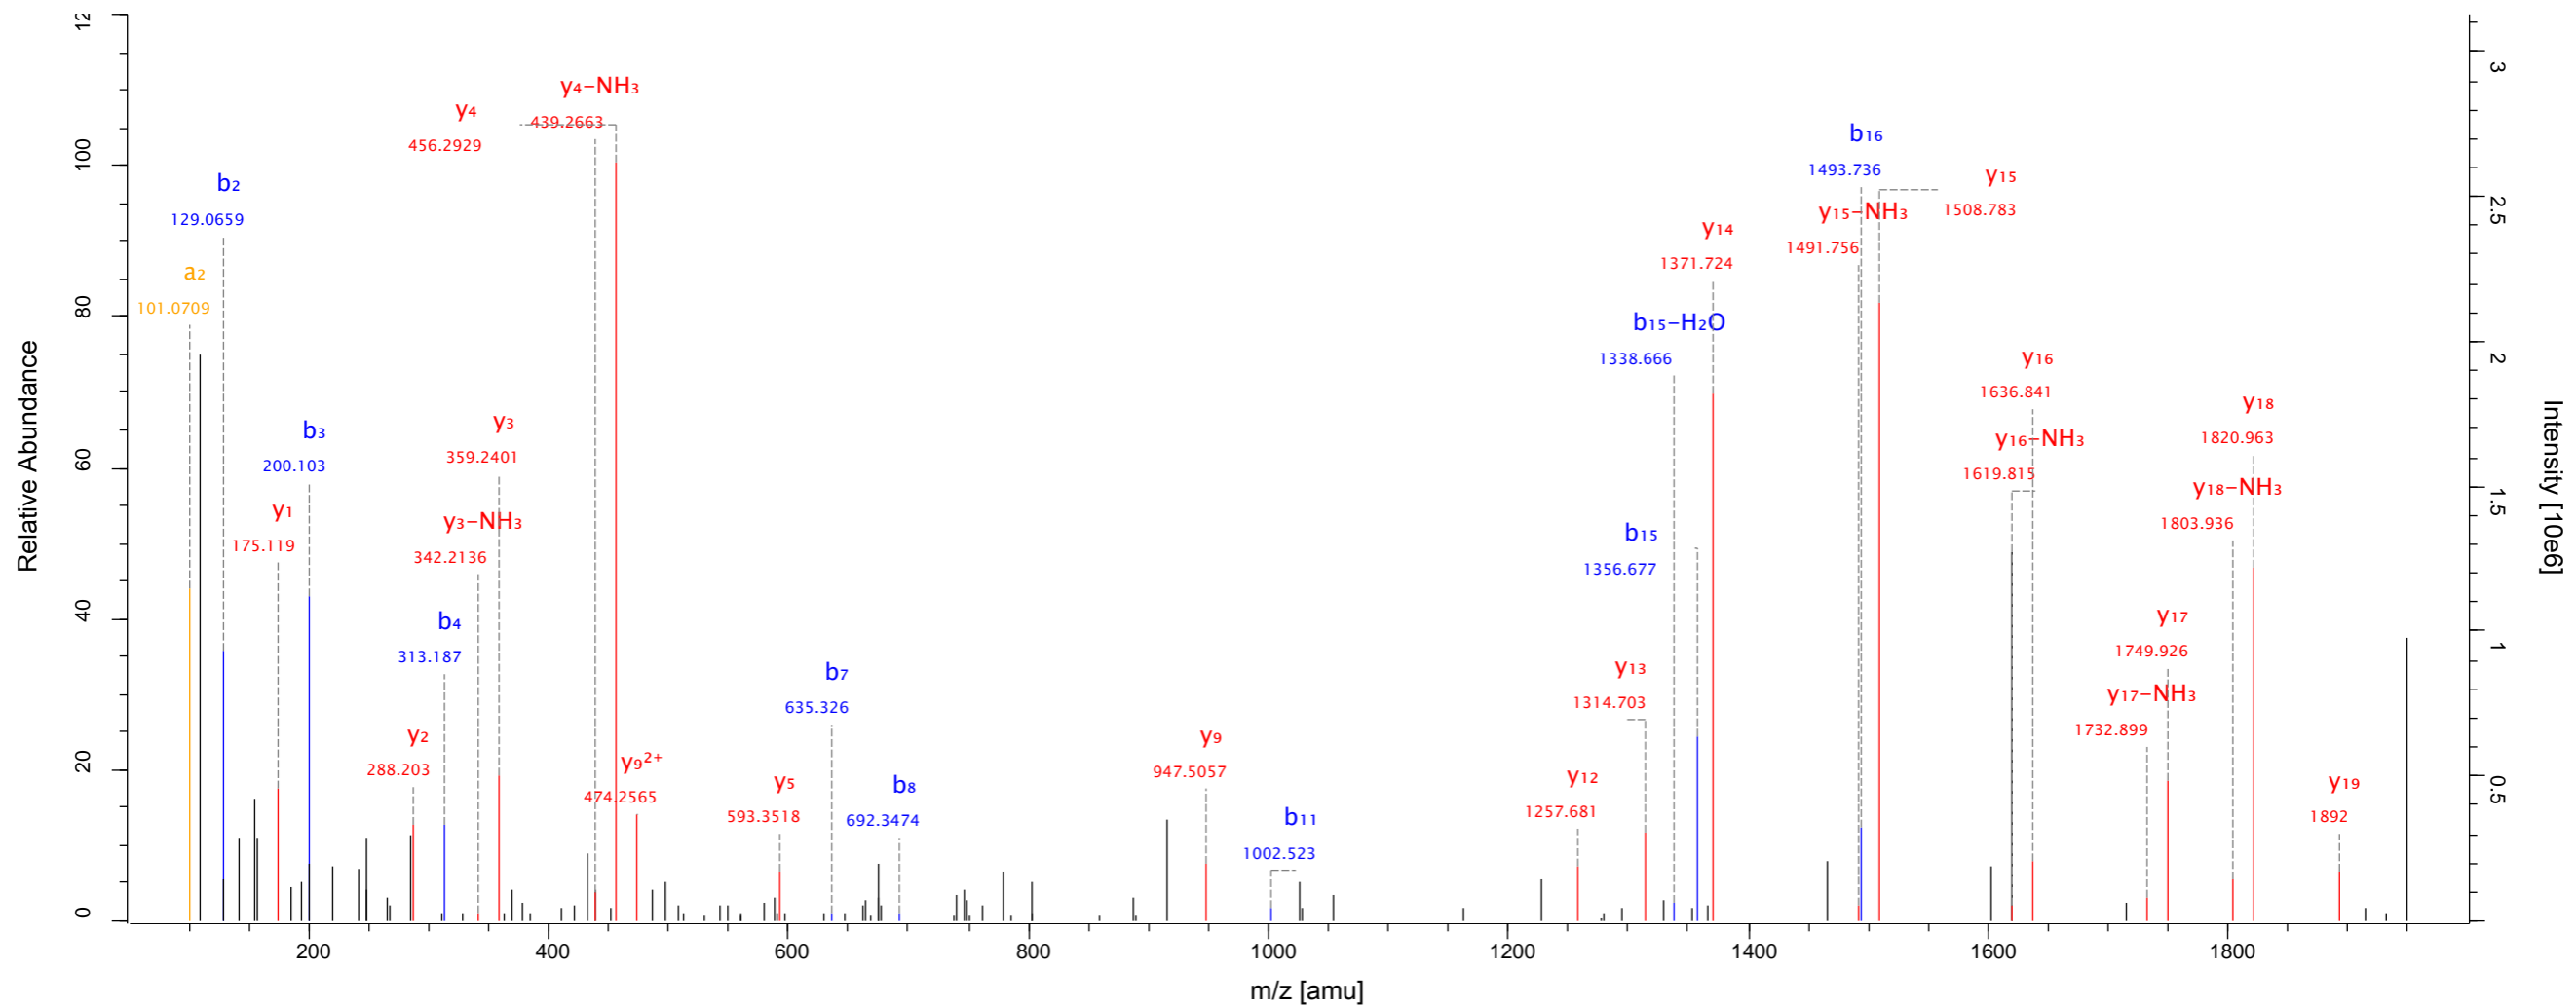

Raw file: 20111212\_EXQ5\_AnMi\_QC\_HCMVp11\_20  
 Scan number: 17814  
 Protein: ORFL299W + NC\_006273.2[185047,185685]+ <unknown description>  
 Peptide score: 195.71  
 Method: FTMS; HCD

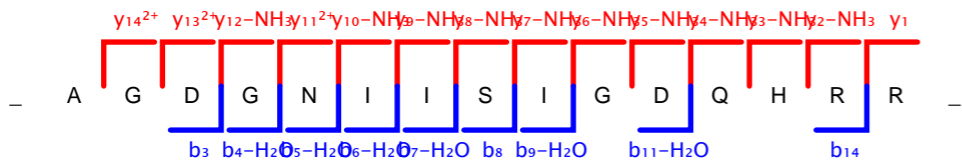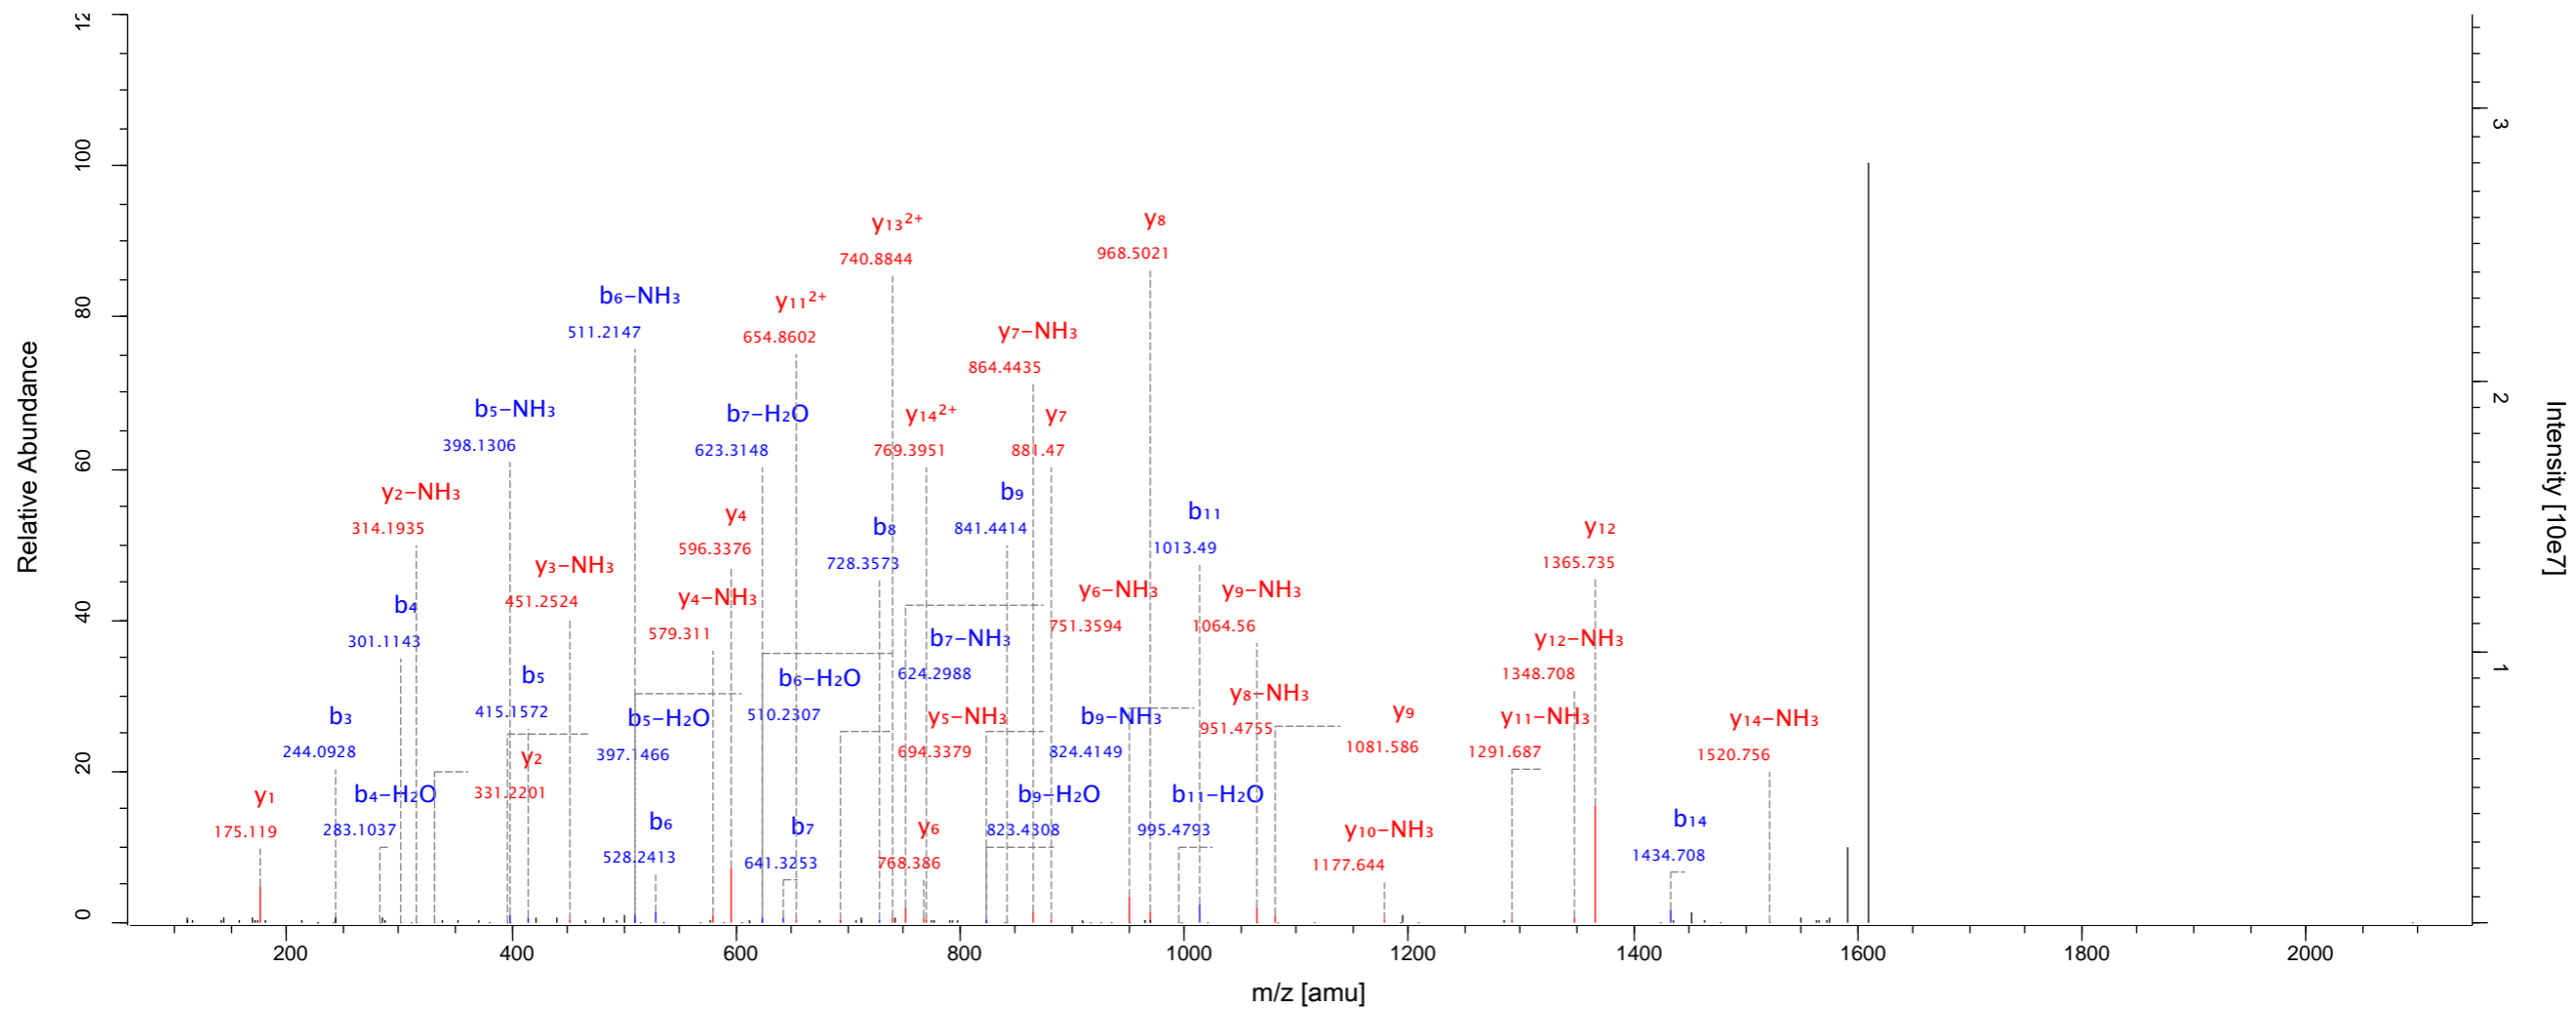

Raw file: 20111212\_EXQ5\_AnMi\_QC\_HCMVp1\_20  
 Scan number: 55496  
 Protein: ORFL299W + NC\_006273.2[185047,185685]+ <unknown description>  
 Peptide score: 158.94  
 Method: FTMS; HCD

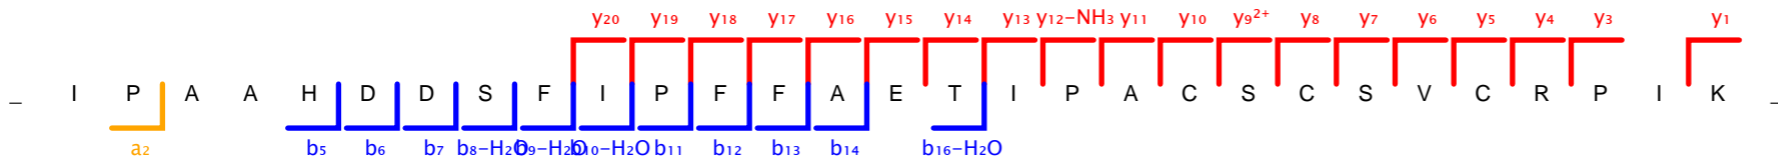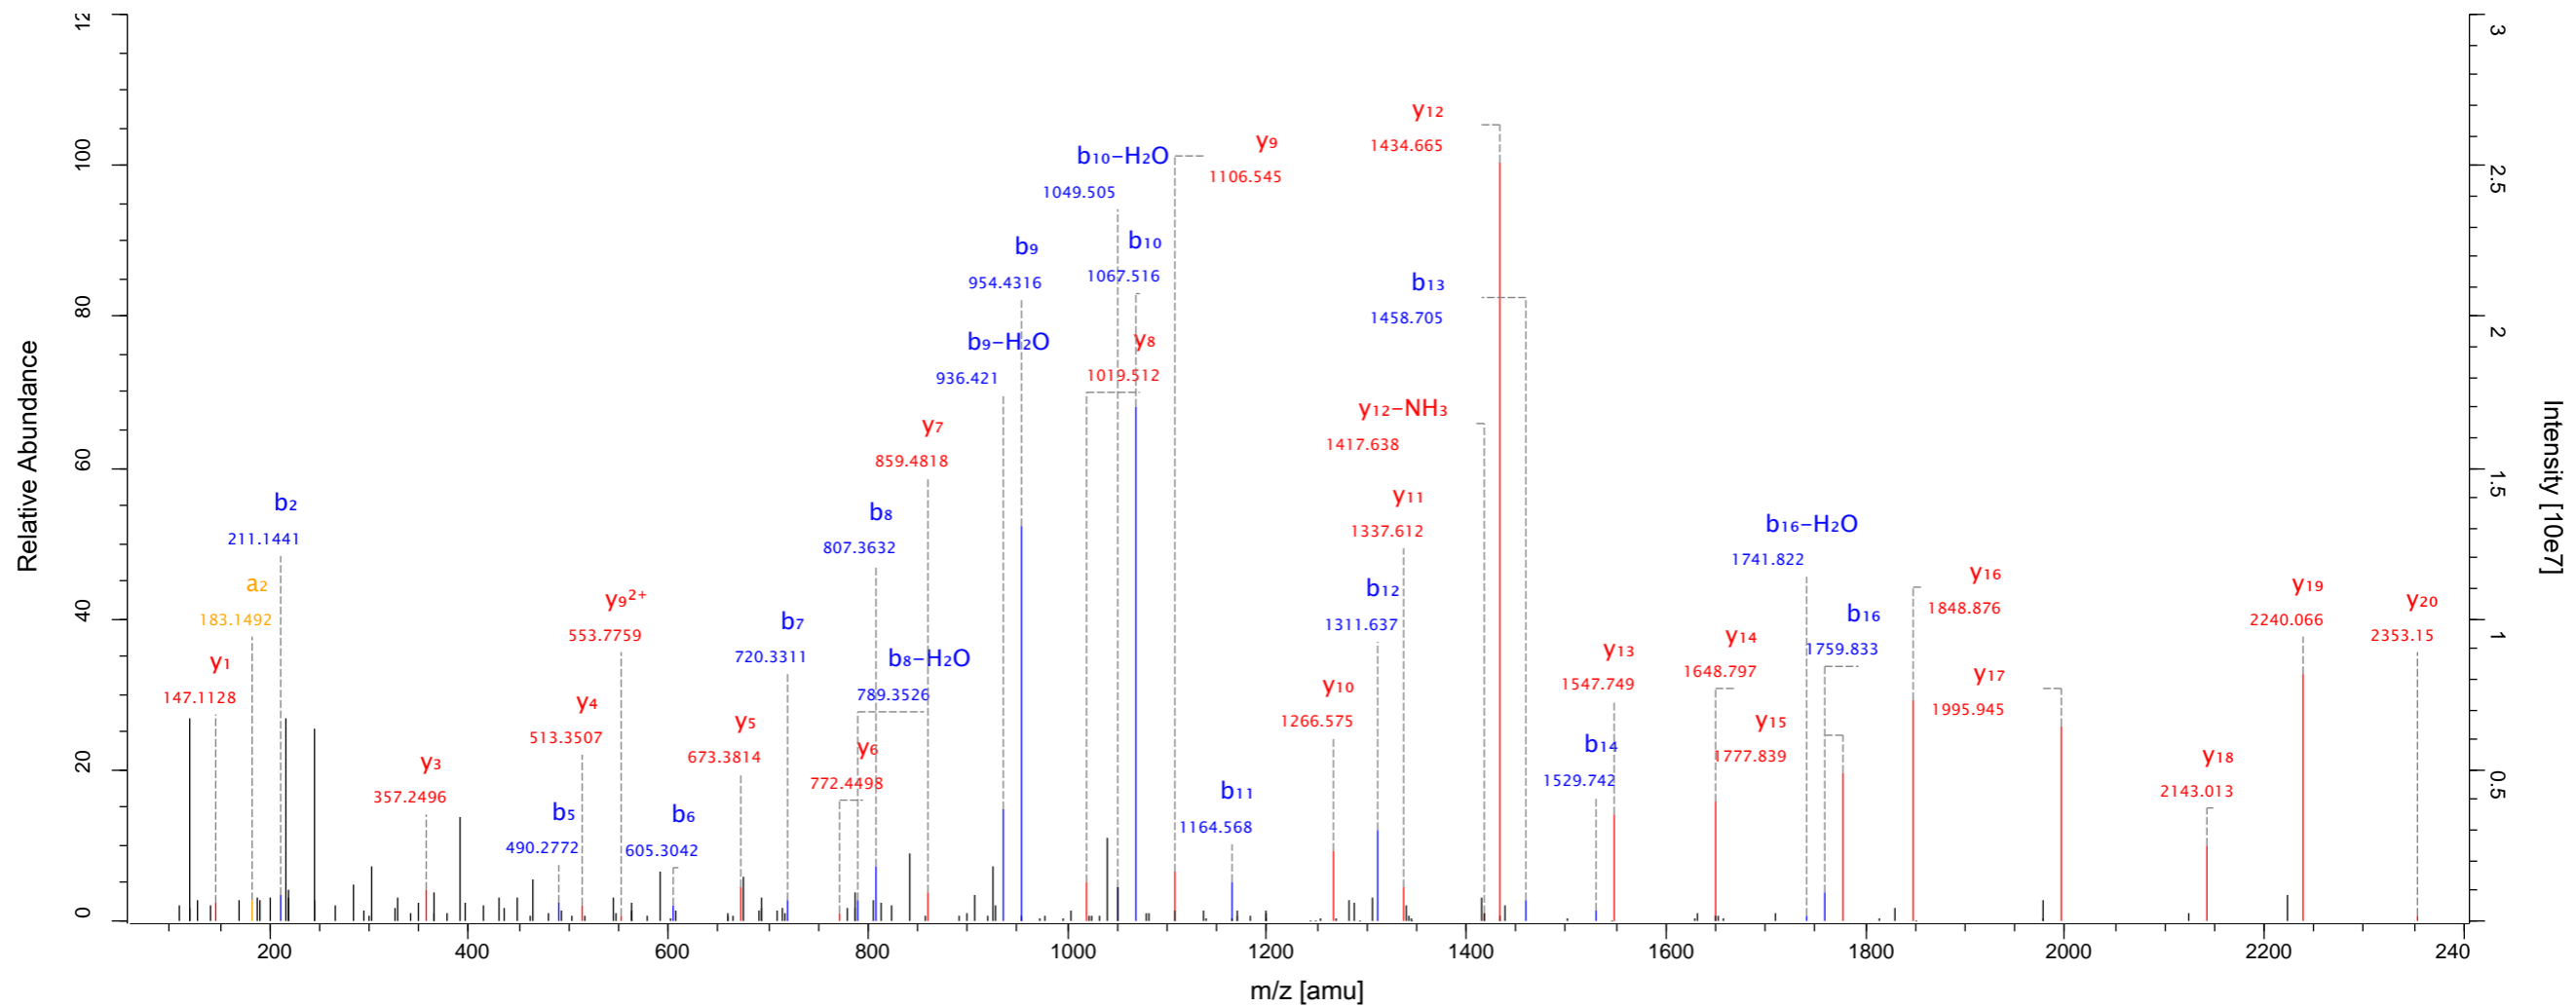

Raw file: 20111212\_EXQ5\_AnMi\_QC\_HCMVp1\_20  
 Scan number: 55519  
 Protein: ORFL299W + NC\_006273.2[185047,185685]+ <unknown description>  
 Peptide score: 162.41  
 Method: FTMS; HCD

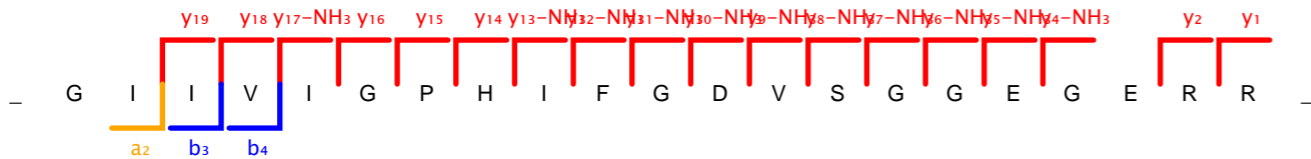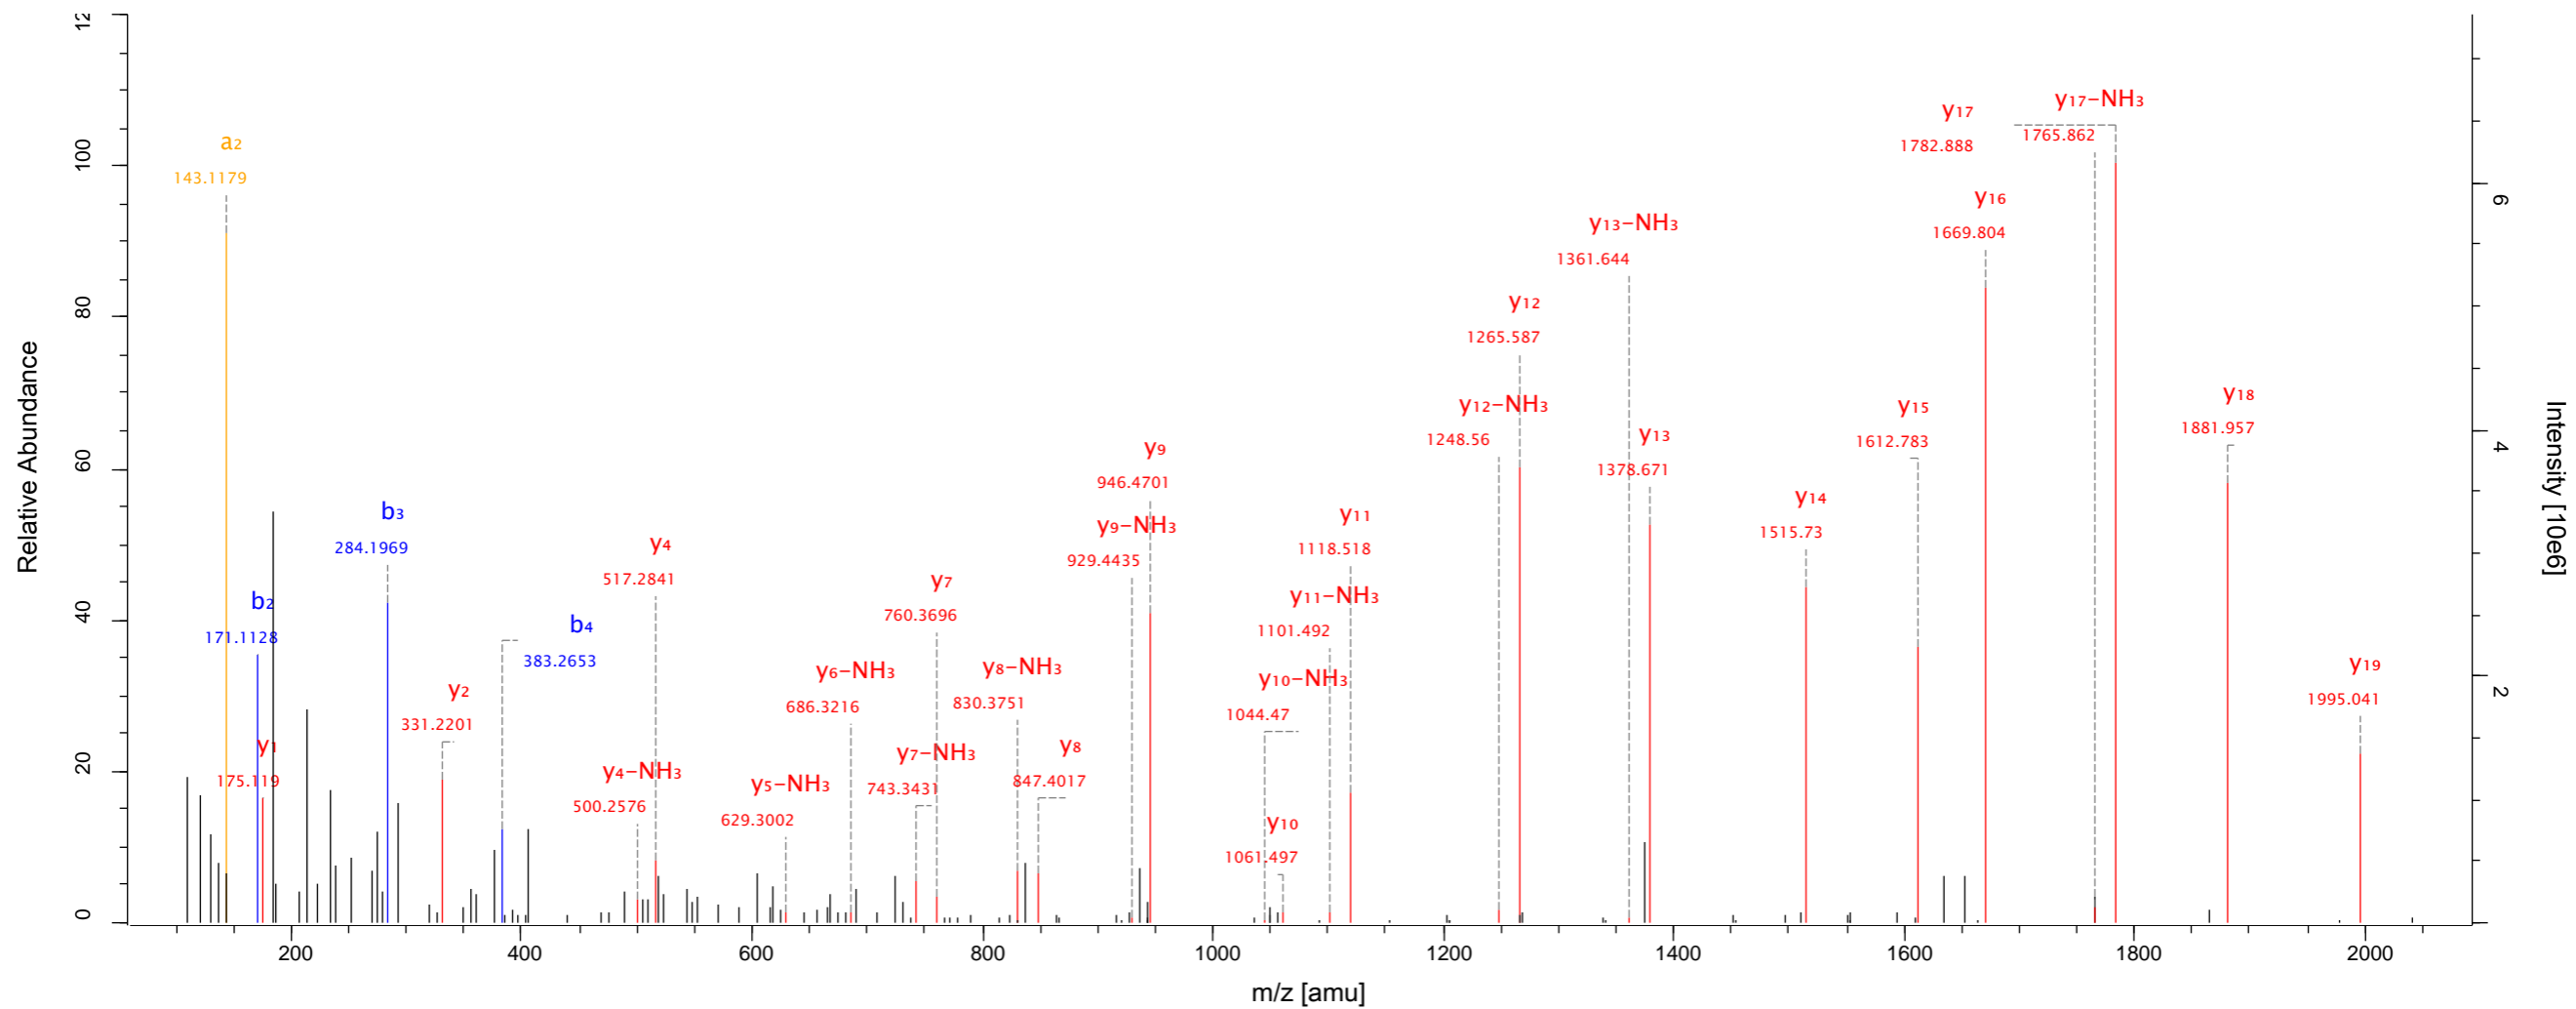

Raw file: 20111212\_EXQ5\_AnMi\_QC\_HCMVp11\_20  
 Scan number: 6903  
 Protein: ORFL114W + NC\_006273.2[60151,60708]+ <unknown description>  
 Peptide score: 160.67  
 Method: FTMS; HCD

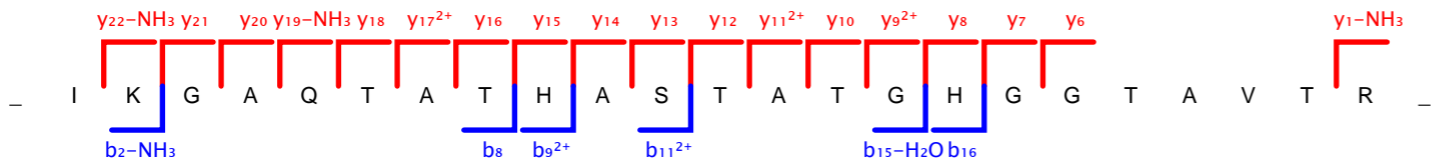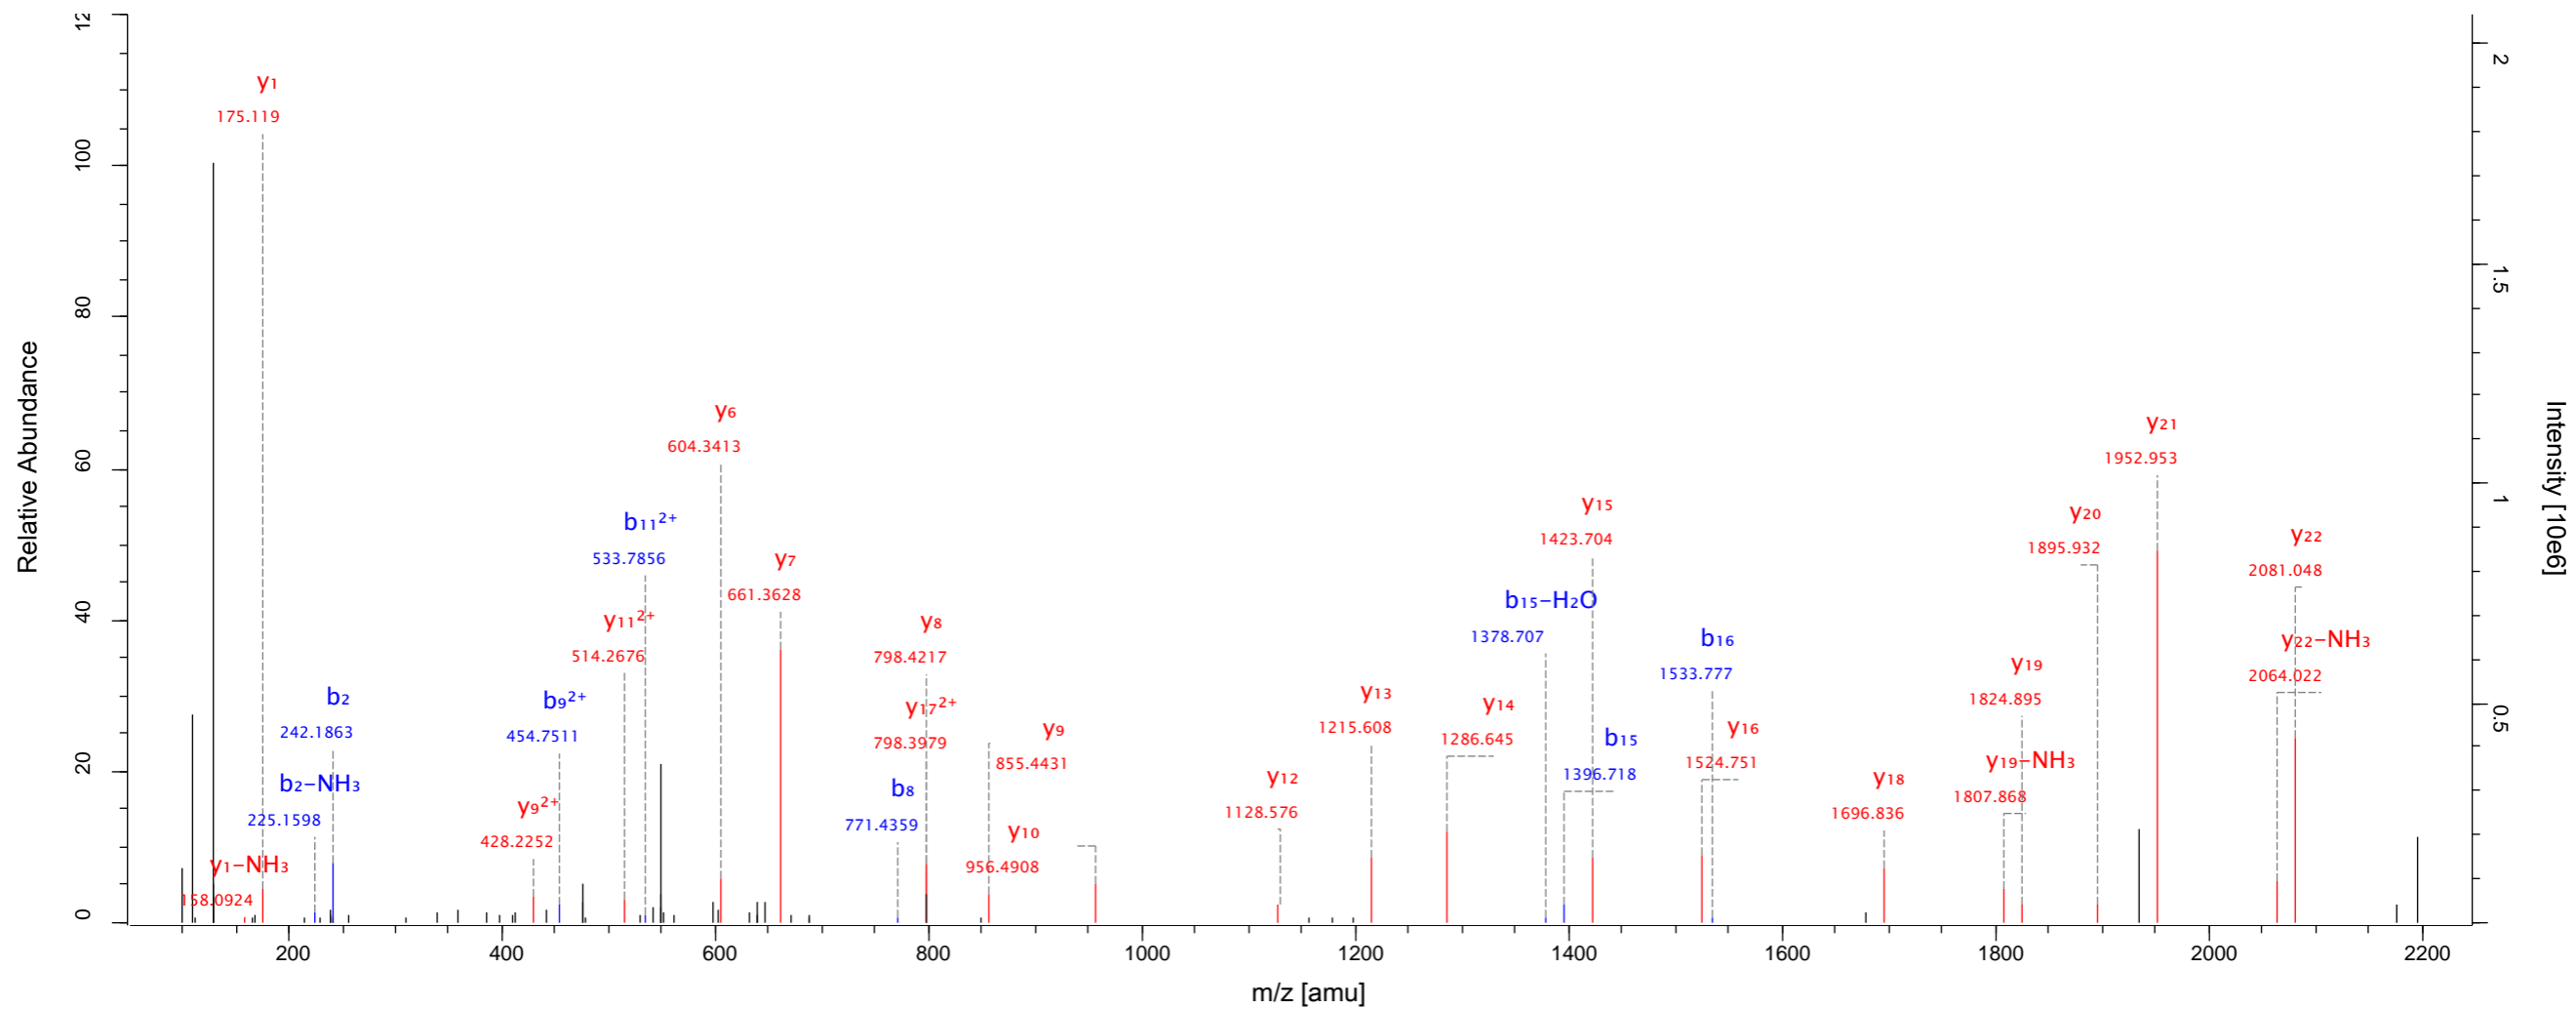

Raw file: 20111212\_EXQ5\_AnMi\_QC\_HCMVp1\_20  
Scan number: 7091  
Protein: ORFL251W + NC\_006273.2[161872,163748]+ <unknown description>; ORFL253W.iORF1 + NC\_006273.2[161917,163748]+ <unknown description>  
Peptide score: 72.65  
Method: FTMS; HCD

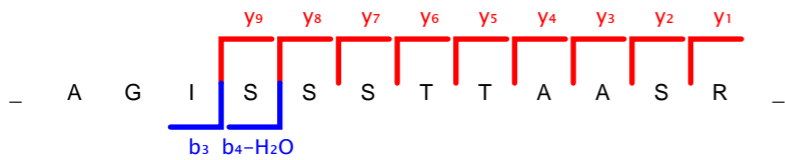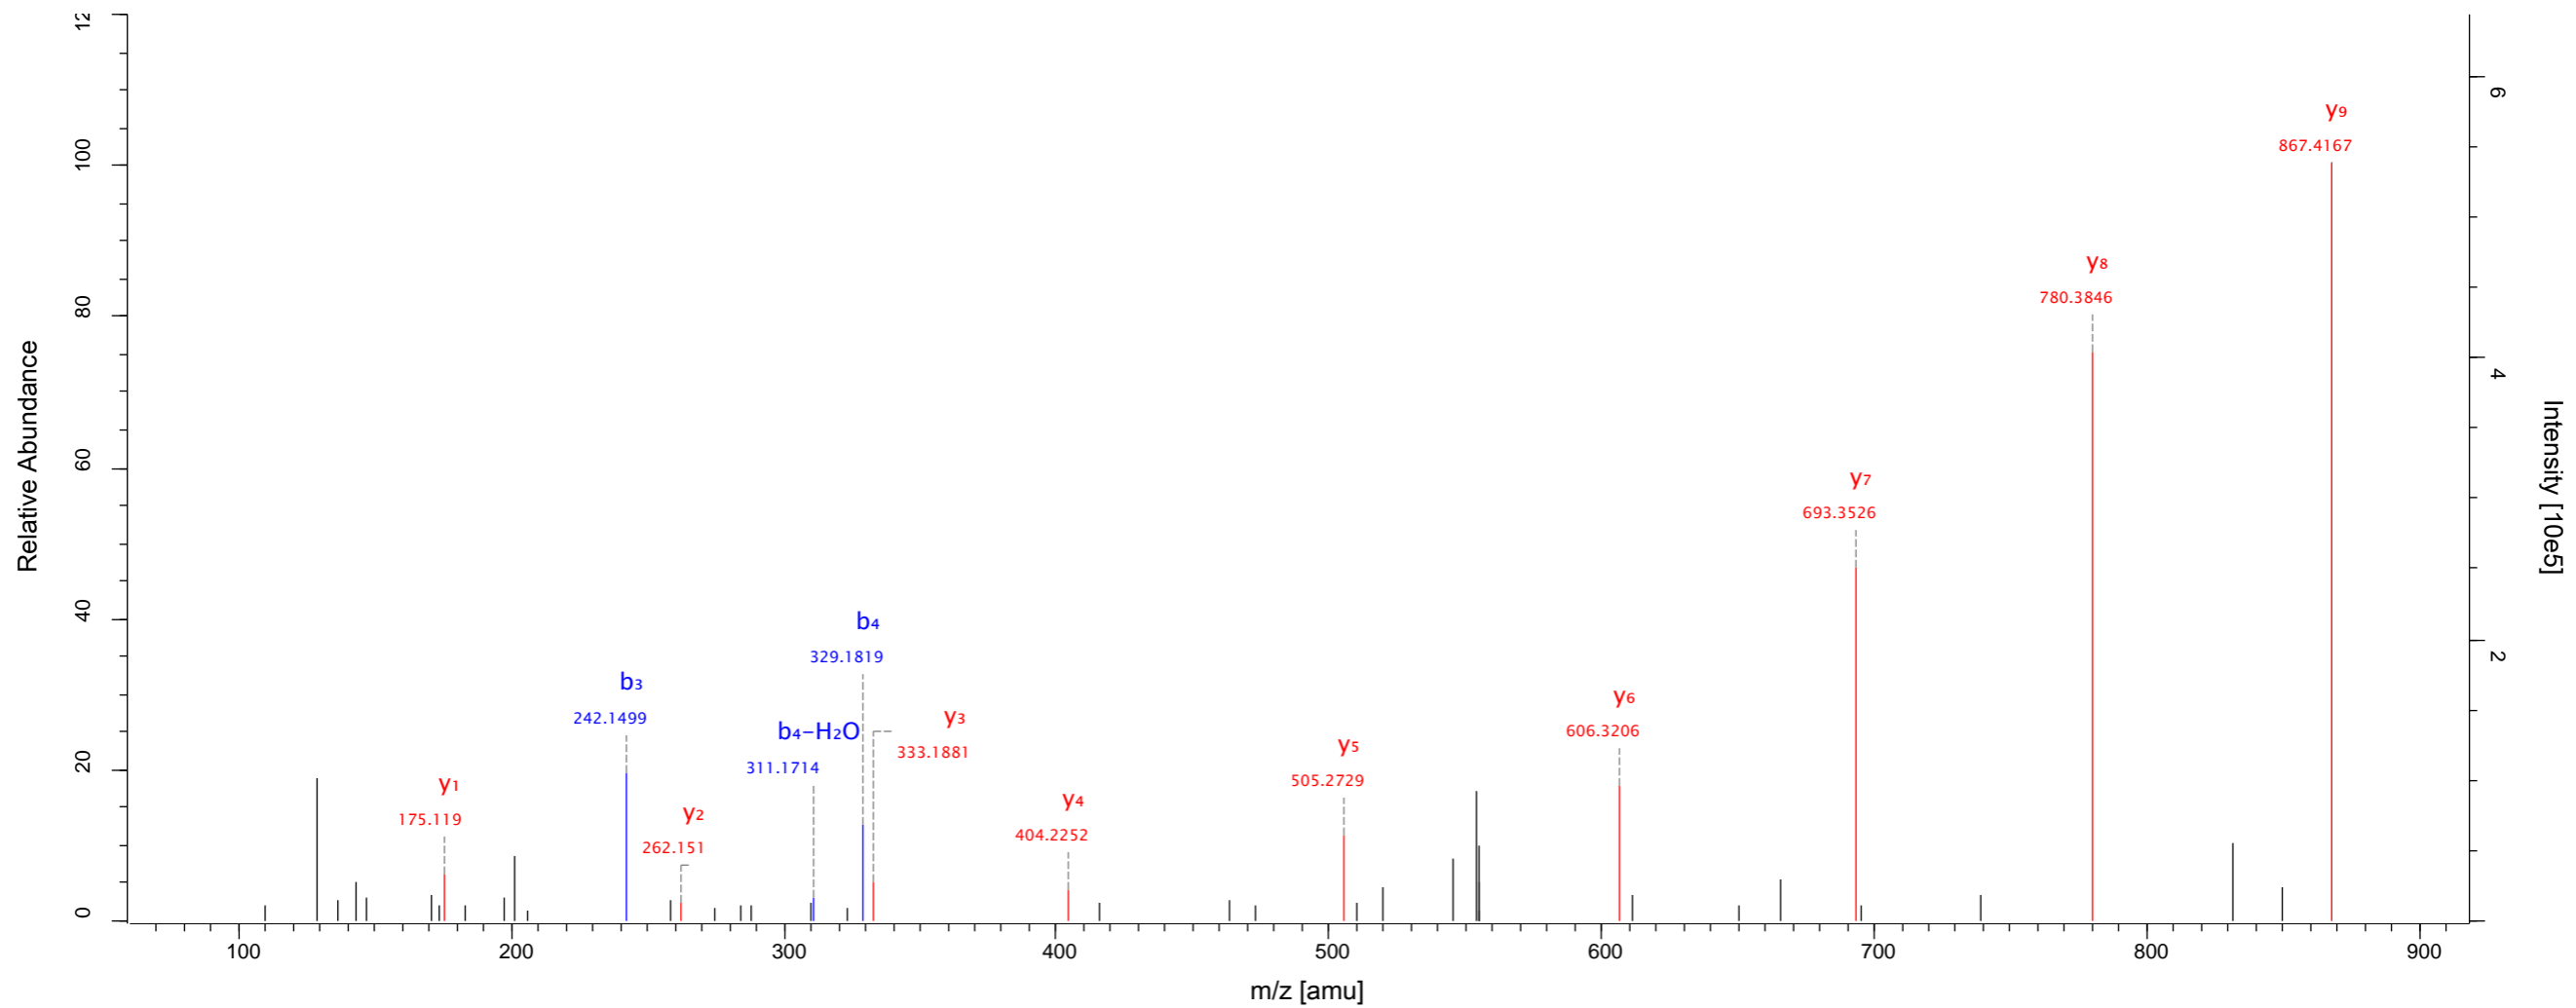



Raw file: 20111212\_EXQ5\_AnMi\_QC\_HCMVp1\_20  
 Scan number: 9061  
 Protein: ORFL299W + NC\_006273.2[185047,185685]+ <unknown description>  
 Peptide score: 145.55  
 Method: FTMS; HCD

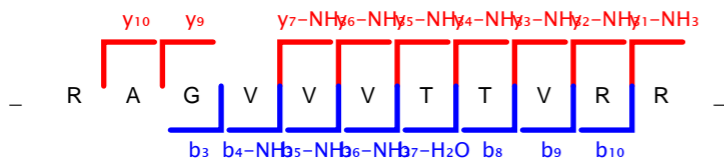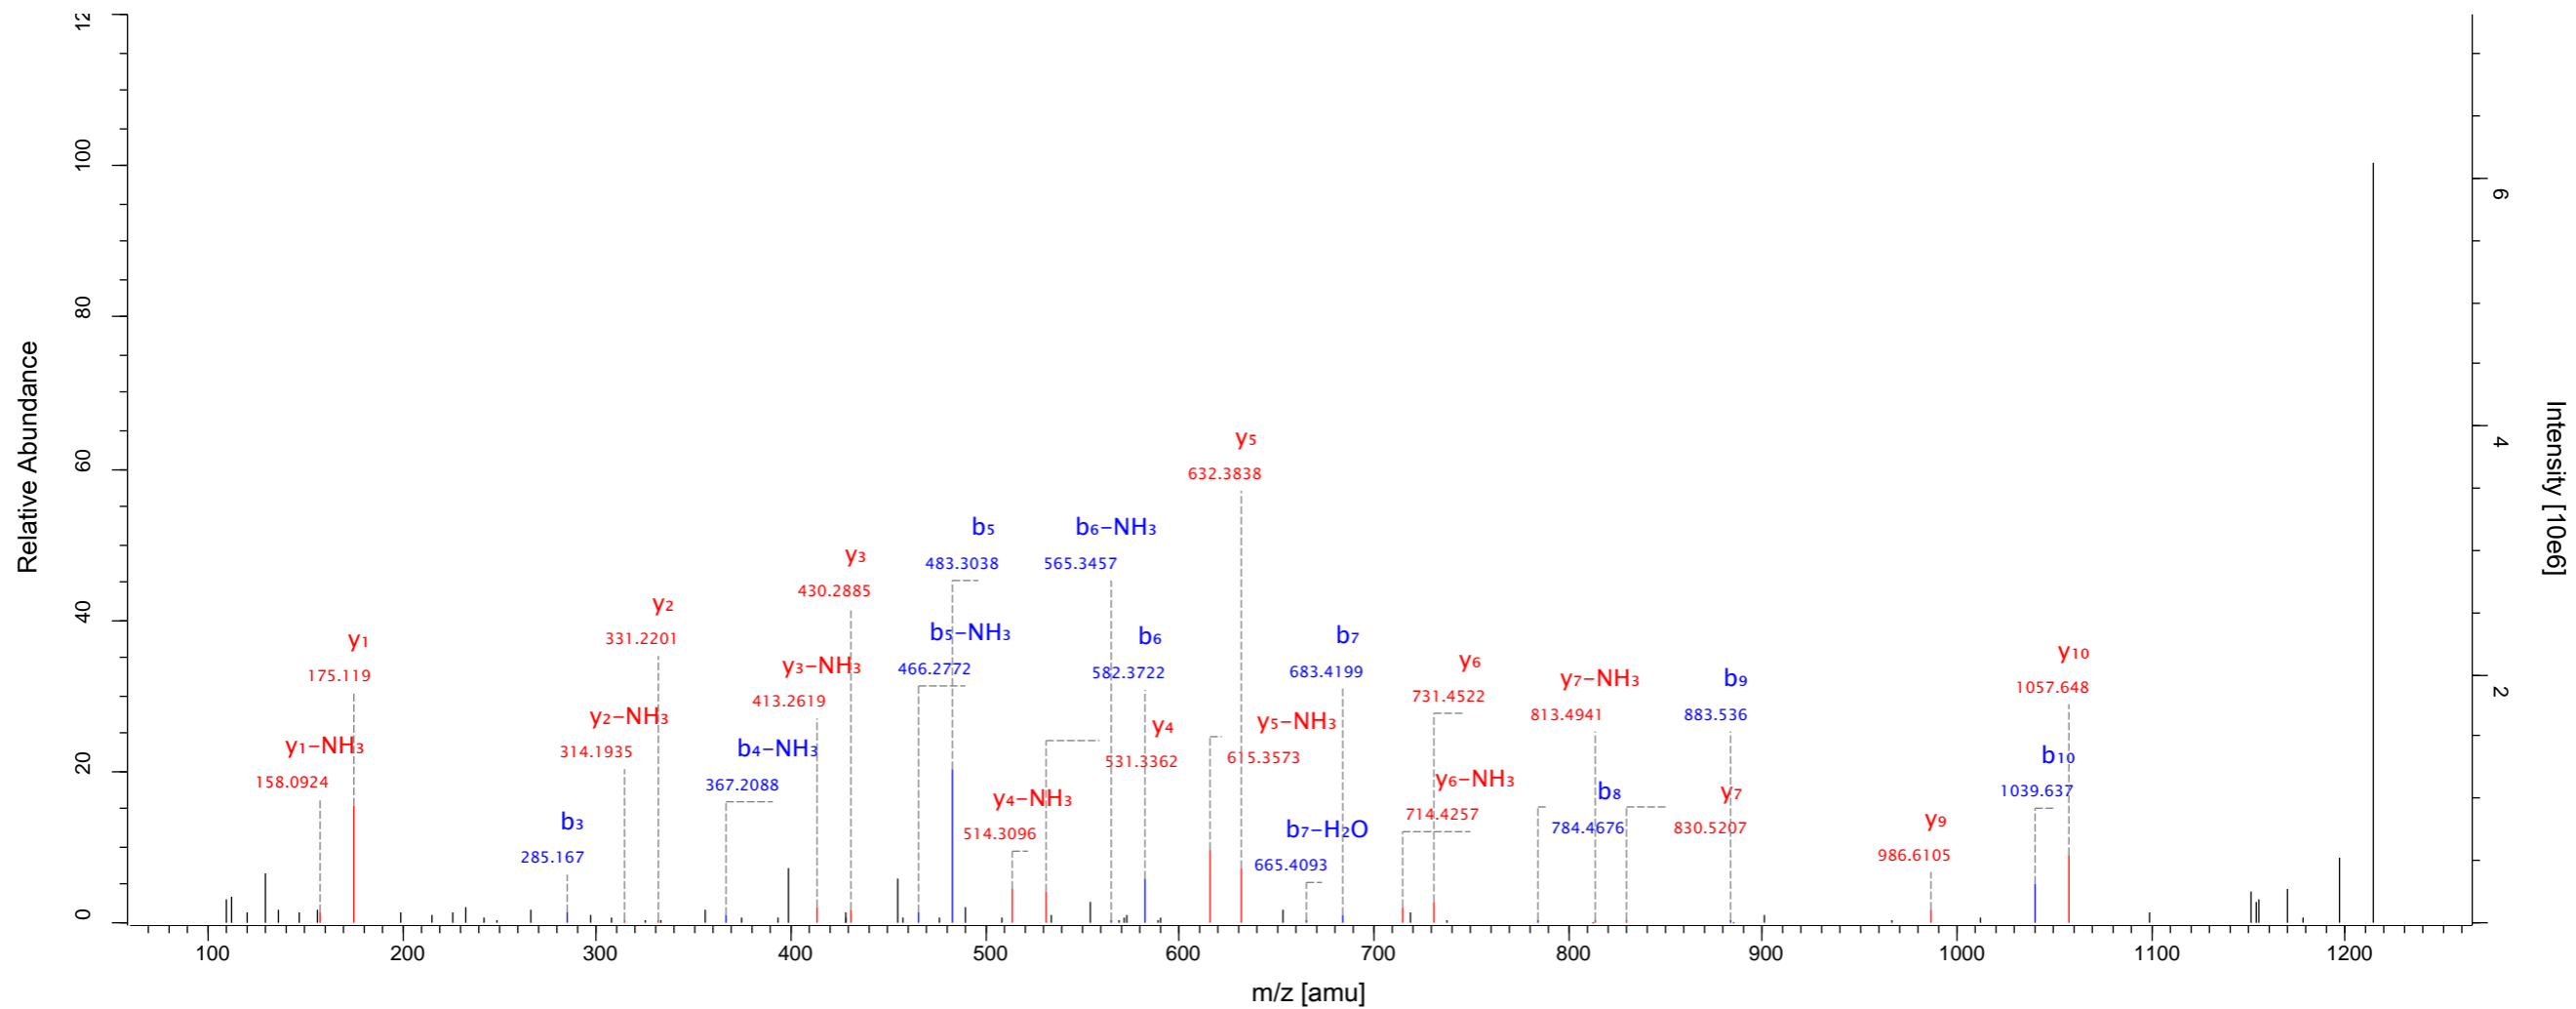

Raw file: 20111212\_EXQ5\_AnMi\_QC\_HCMVp1\_21

Scan number: 10367

Protein: ORFL321W + NC\_006273.2[191968,194126]+ <unknown description>; ORFL321W.iORF1 + NC\_006273.2[191968,194126]+ <unknown description>; ORFL321W.iORF4 + NC\_006273.2[193200,194126]+ <unknown description>

Peptide score: 130.31

Method: FTMS; HCD

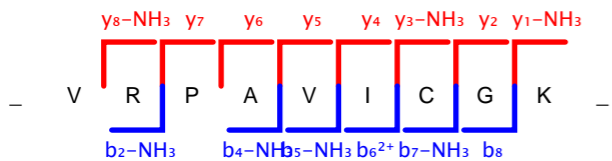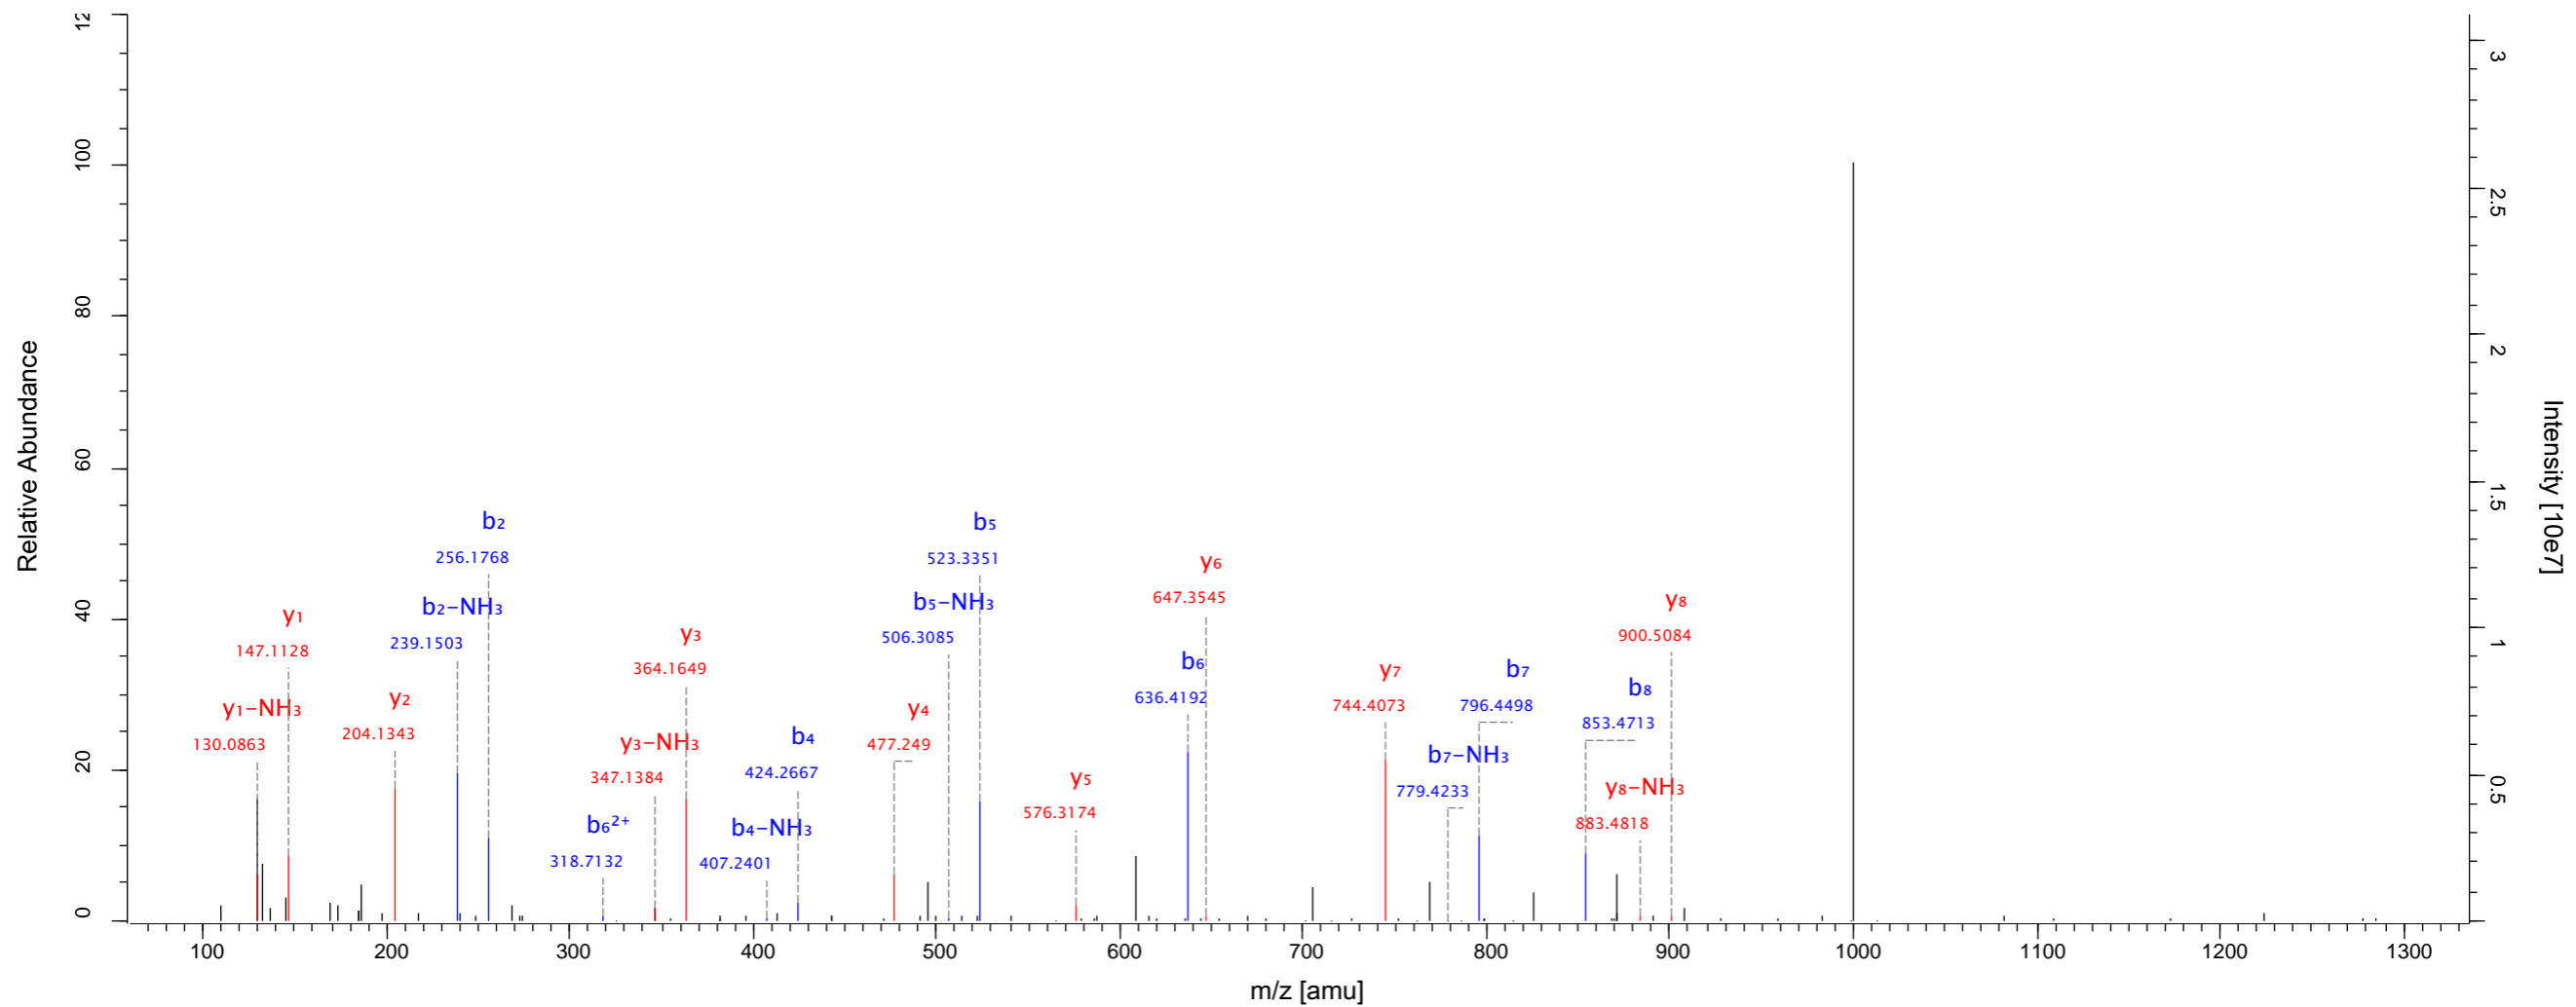

Raw file: 20111212\_EXQ5\_AnMi\_QC\_HCMVp11\_21

Scan number: 19969

Protein: ORFL321W + NC\_006273.2[191968,194126]+ <unknown description>; ORFL321W.iORF1 + NC\_006273.2[191968,194126]+ <unknown description>; ORFL321W.iORF4 + NC\_006273.2[193200,194126]+ <unknown description>

Peptide score: 207.44

Method: FTMS; HCD

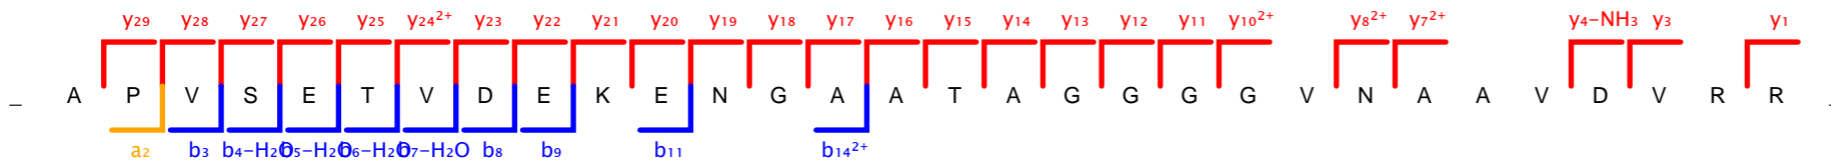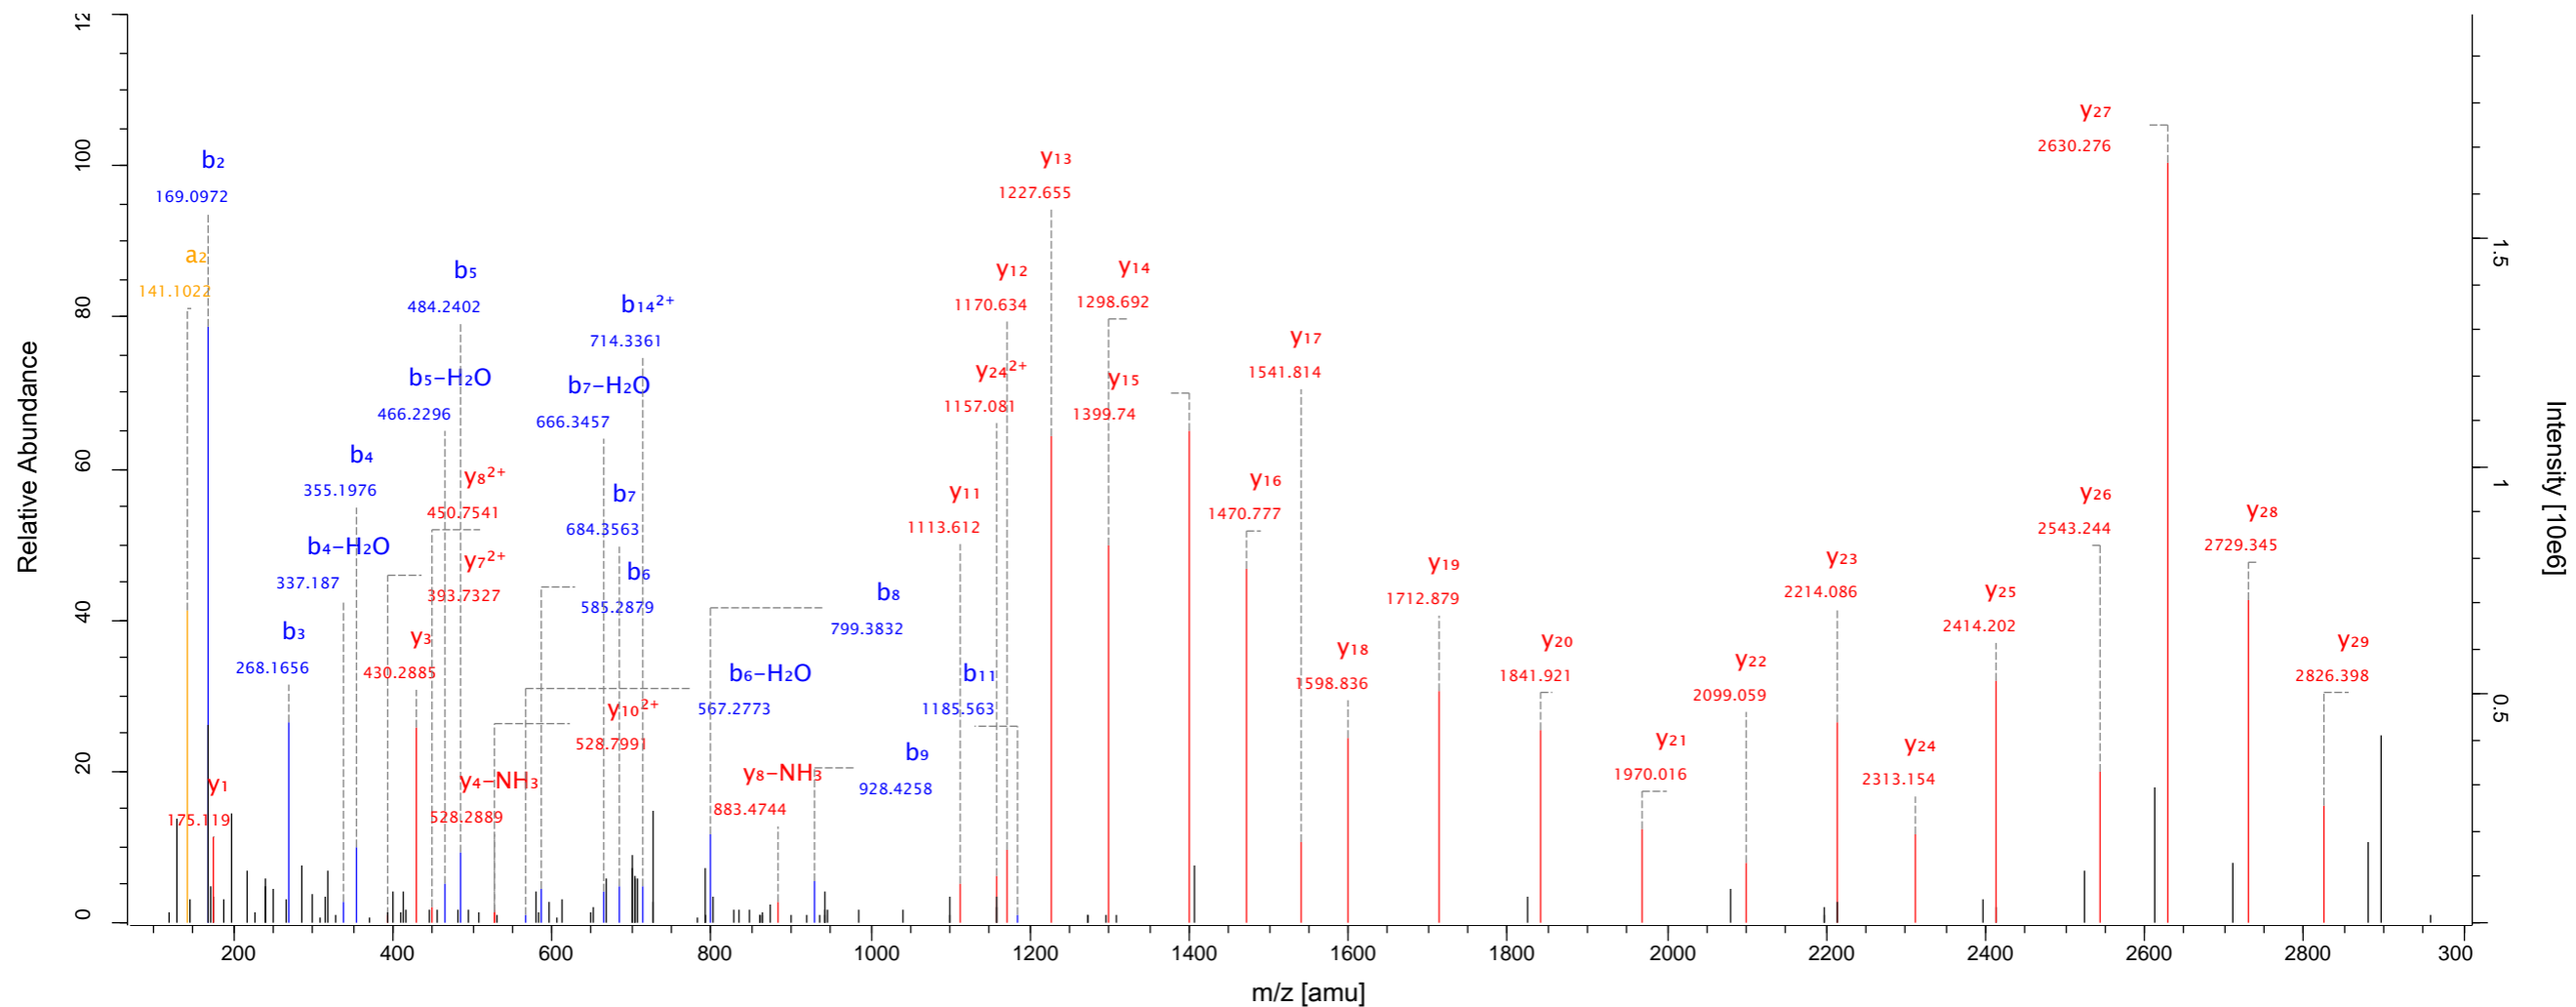

Raw file: 20111212\_EXQ5\_AnMi\_QC\_HCMVp1\_21  
Scan number: 26548  
Protein: ORFS365W + NC\_006273.2[225950,226606]+ <unknown description>  
Peptide score: 121.5  
Method: FTMS; HCD

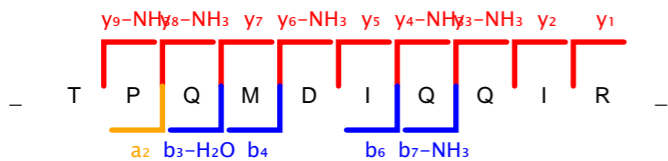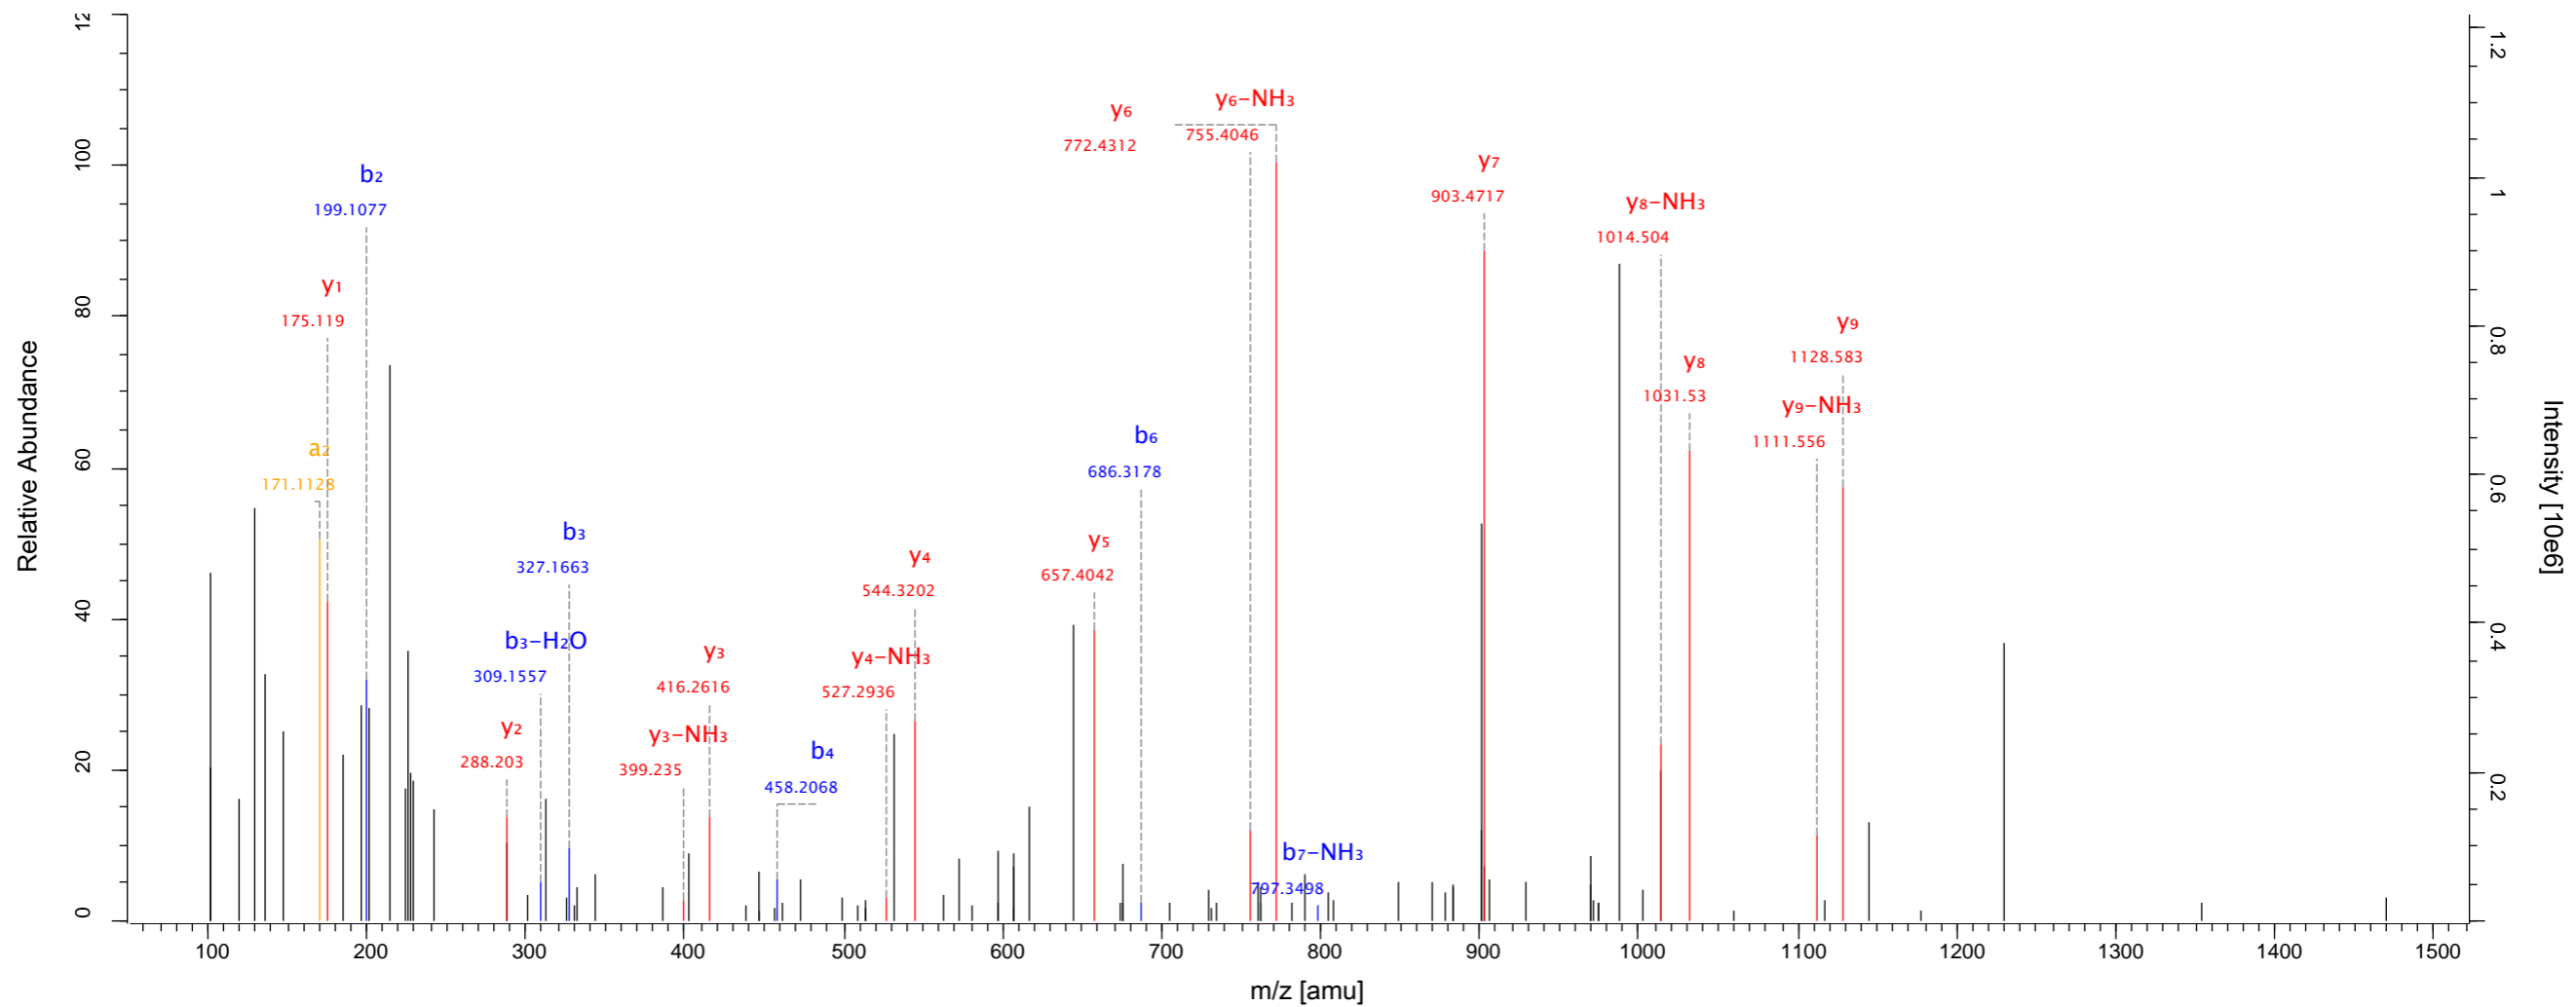

Raw file: 20111212\_EXQ5\_AnMi\_QC\_HCMVp1\_21  
Scan number: 32014  
Protein: ORFL251W + NC\_006273.2[161872,163748]+ <unknown description>  
Peptide score: 89.05  
Method: FTMS; HCD

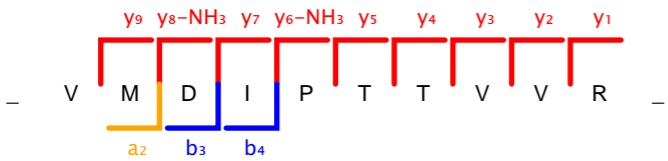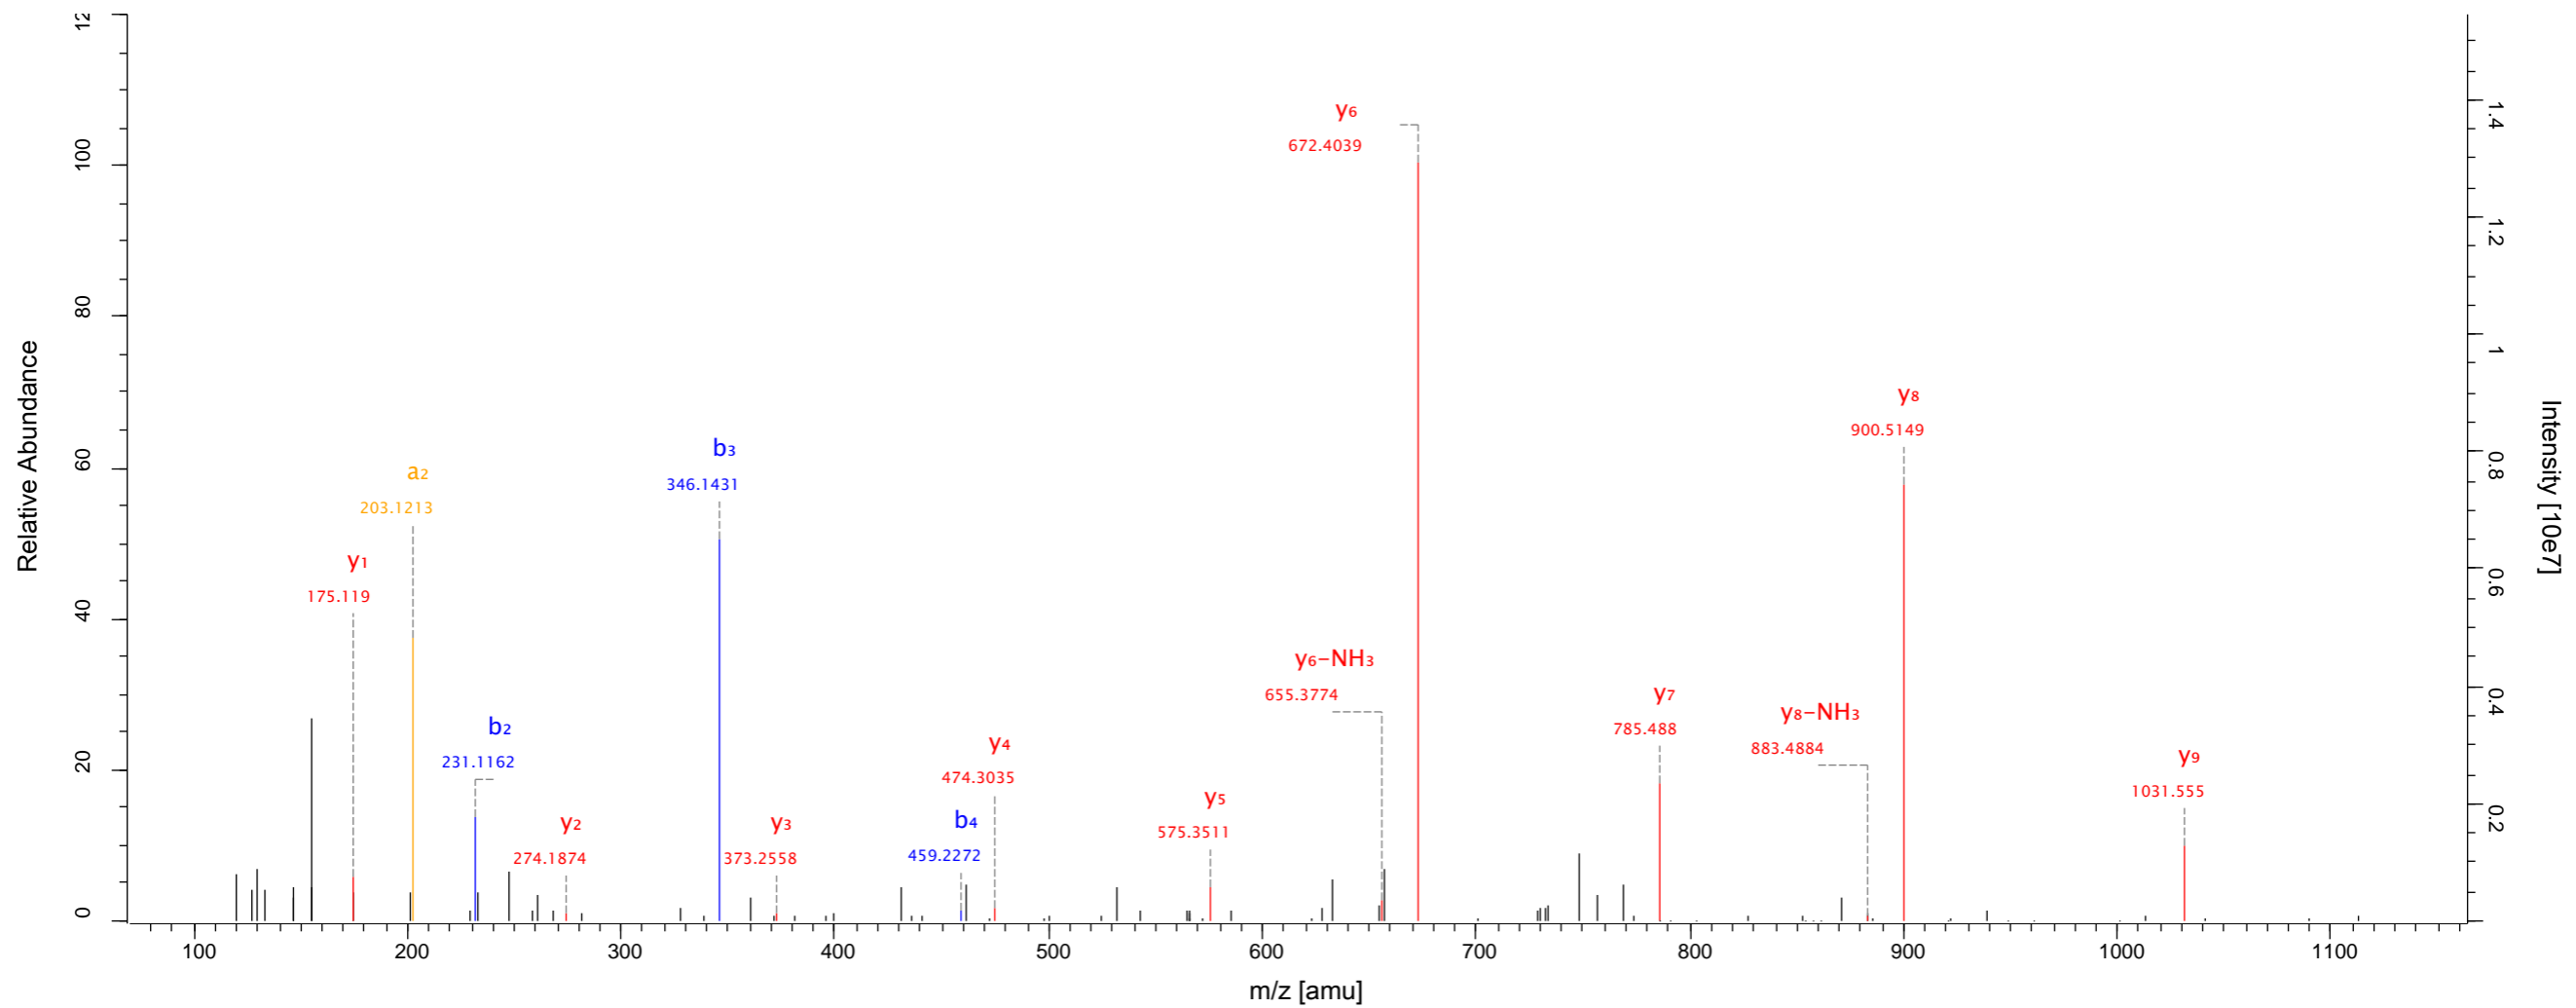

Raw file: 20111212\_EXQ5\_AnMi\_QC\_HCMVp1\_21

Scan number: 32634

Protein: ORFL321W + NC\_006273.2[191968,194126]+ <unknown description>; ORFL321W.iORF1 + NC\_006273.2[191968,194126]+ <unknown description>; ORFL321W.iORF4 + NC\_006273.2[193200,194126]+ <unknown description>

Peptide score: 199.96

Method: FTMS; HCD

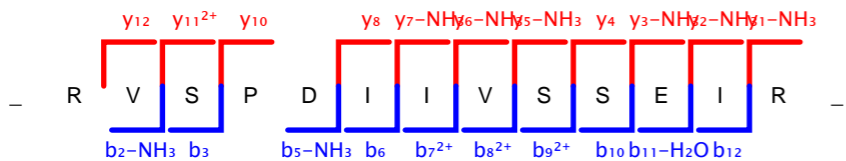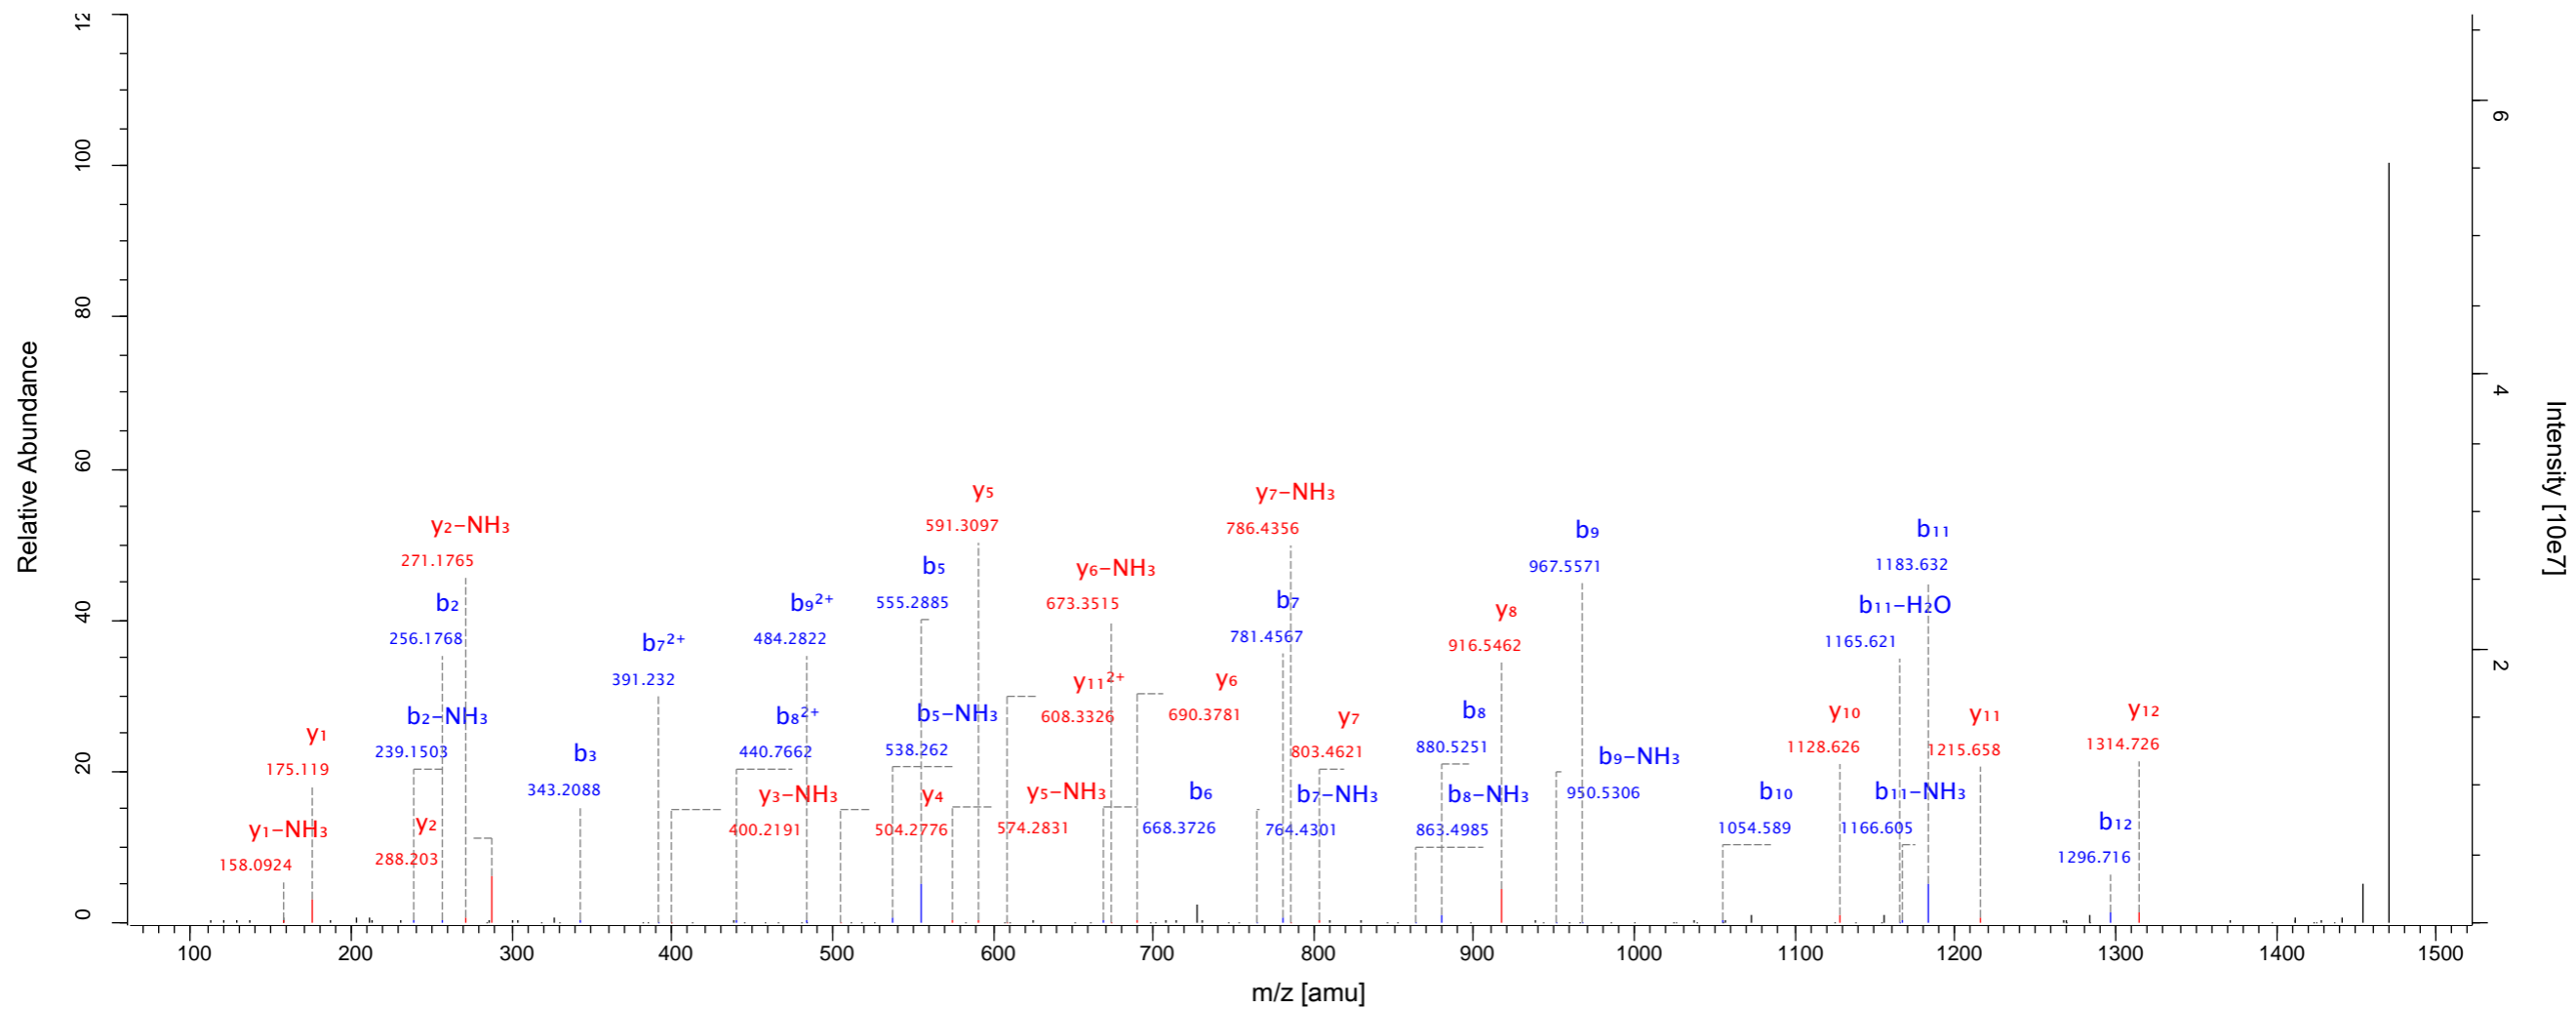

Raw file: 20111212\_EXQ5\_AnMi\_QC\_HCMVp1\_21  
 Scan number: 35256  
 Protein: ORFL147C - NC\_006273.2[85932,87362]- <unknown description>  
 Peptide score: 193.11  
 Method: FTMS; HCD

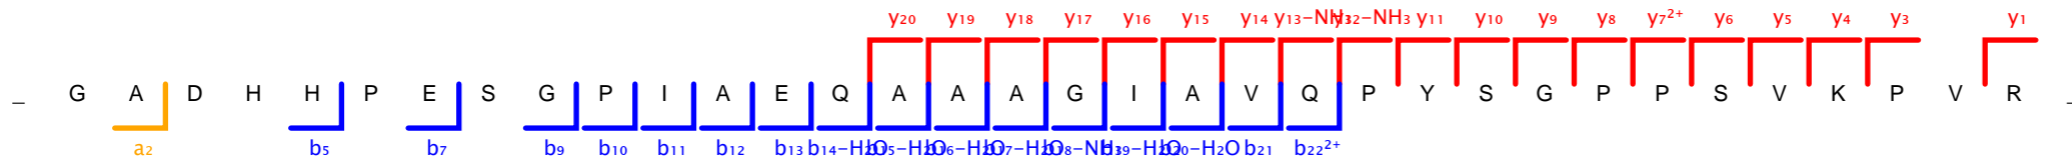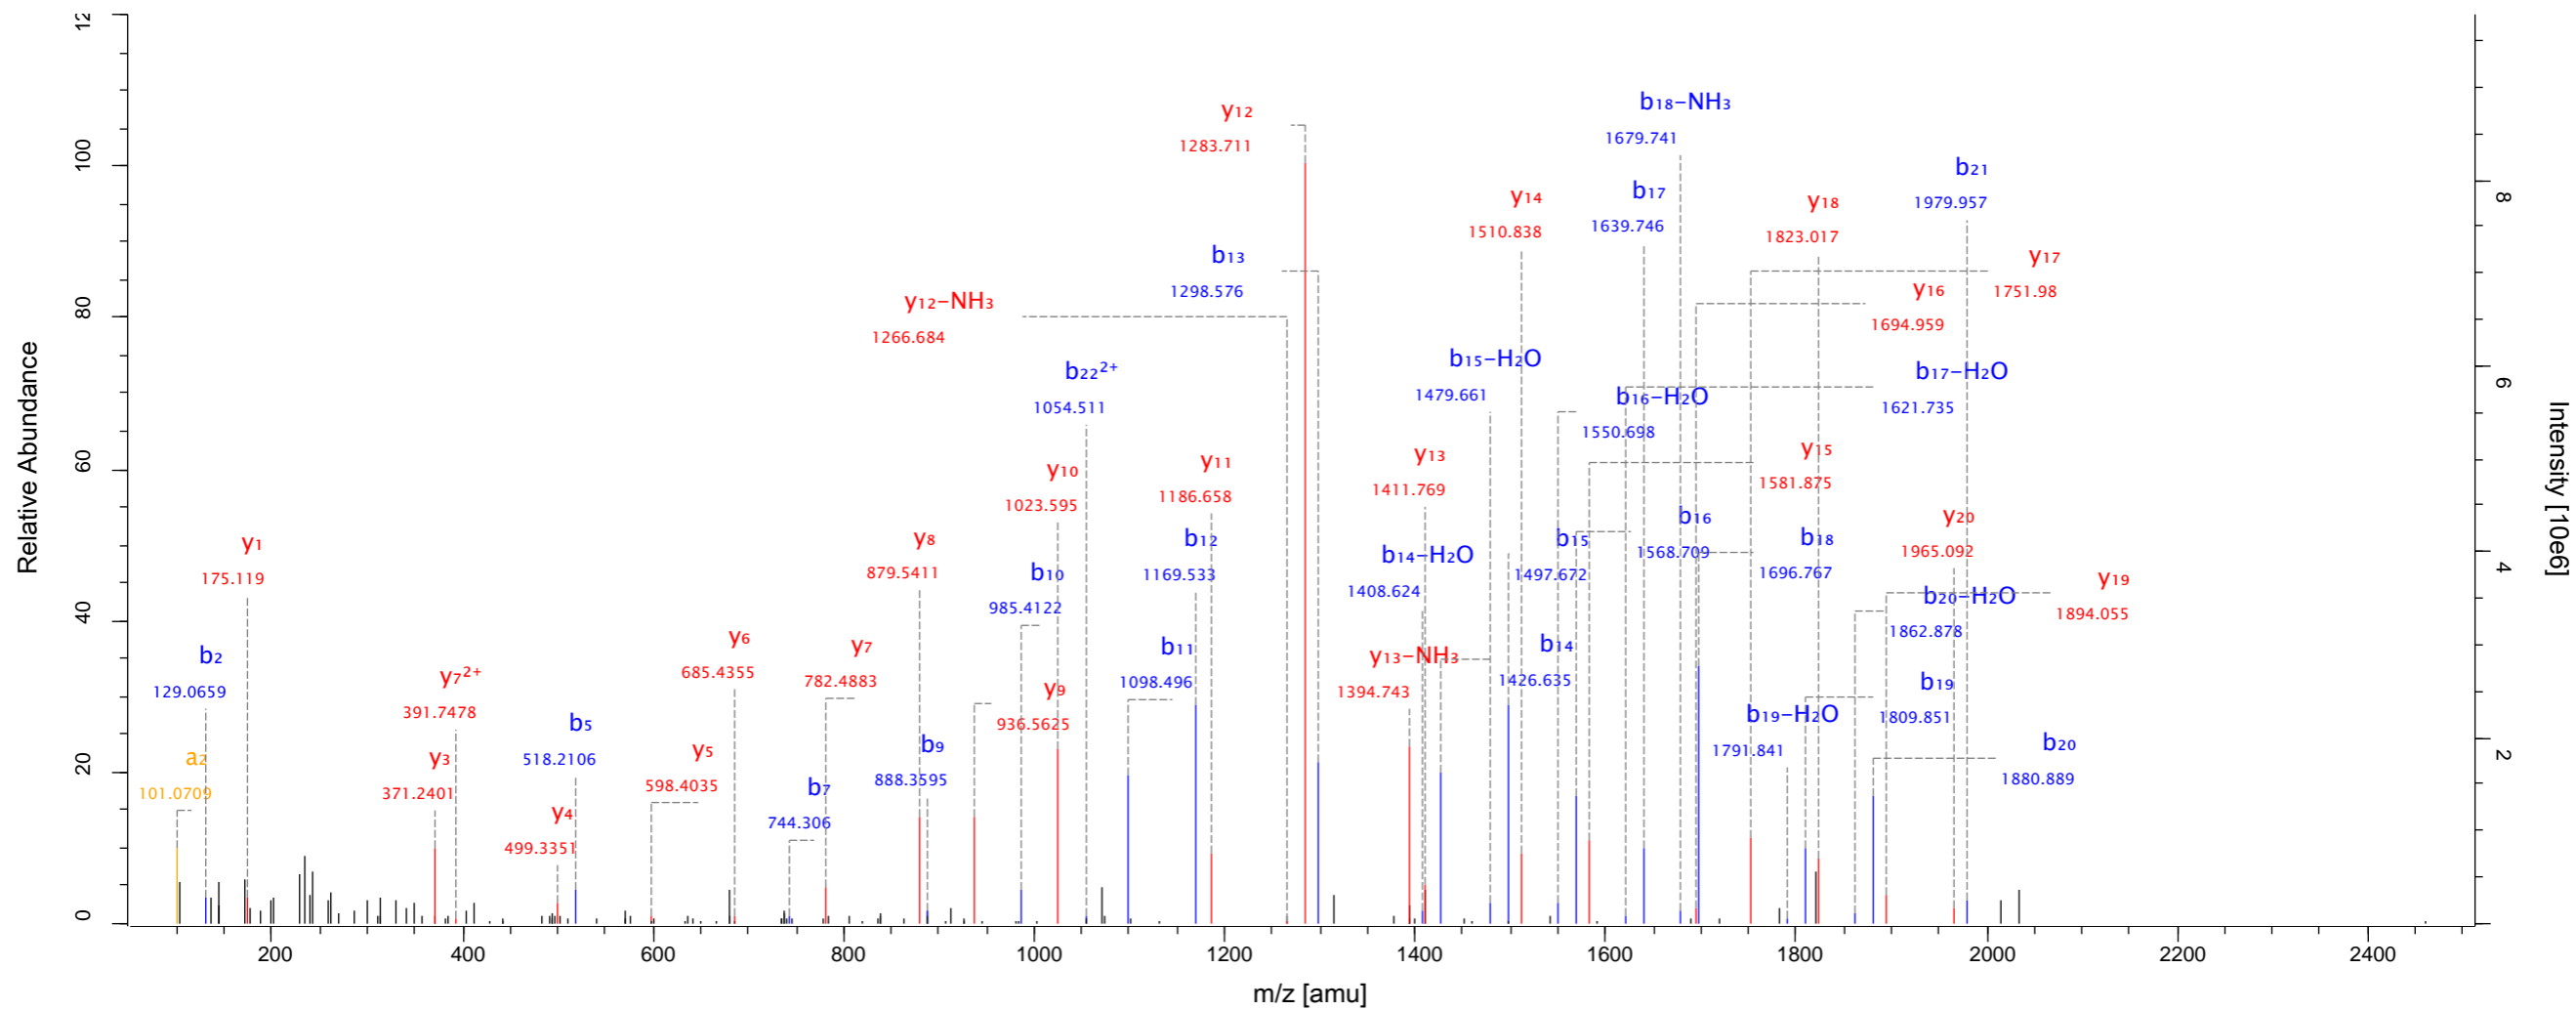

Raw file: 20111212\_EXQ5\_AnMi\_QC\_HCMVp11\_21

Scan number: 38690

Protein: ORFL321W + NC\_006273.2[191968,194126]+ <unknown description>; ORFL321W.iORF1 + NC\_006273.2[191968,194126]+ <unknown description>; ORFL321W.iORF4 + NC\_006273.2[193200,194126]+ <unknown description>

Peptide score: 163.84

Method: FTMS; HCD

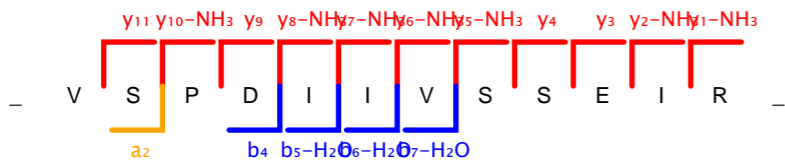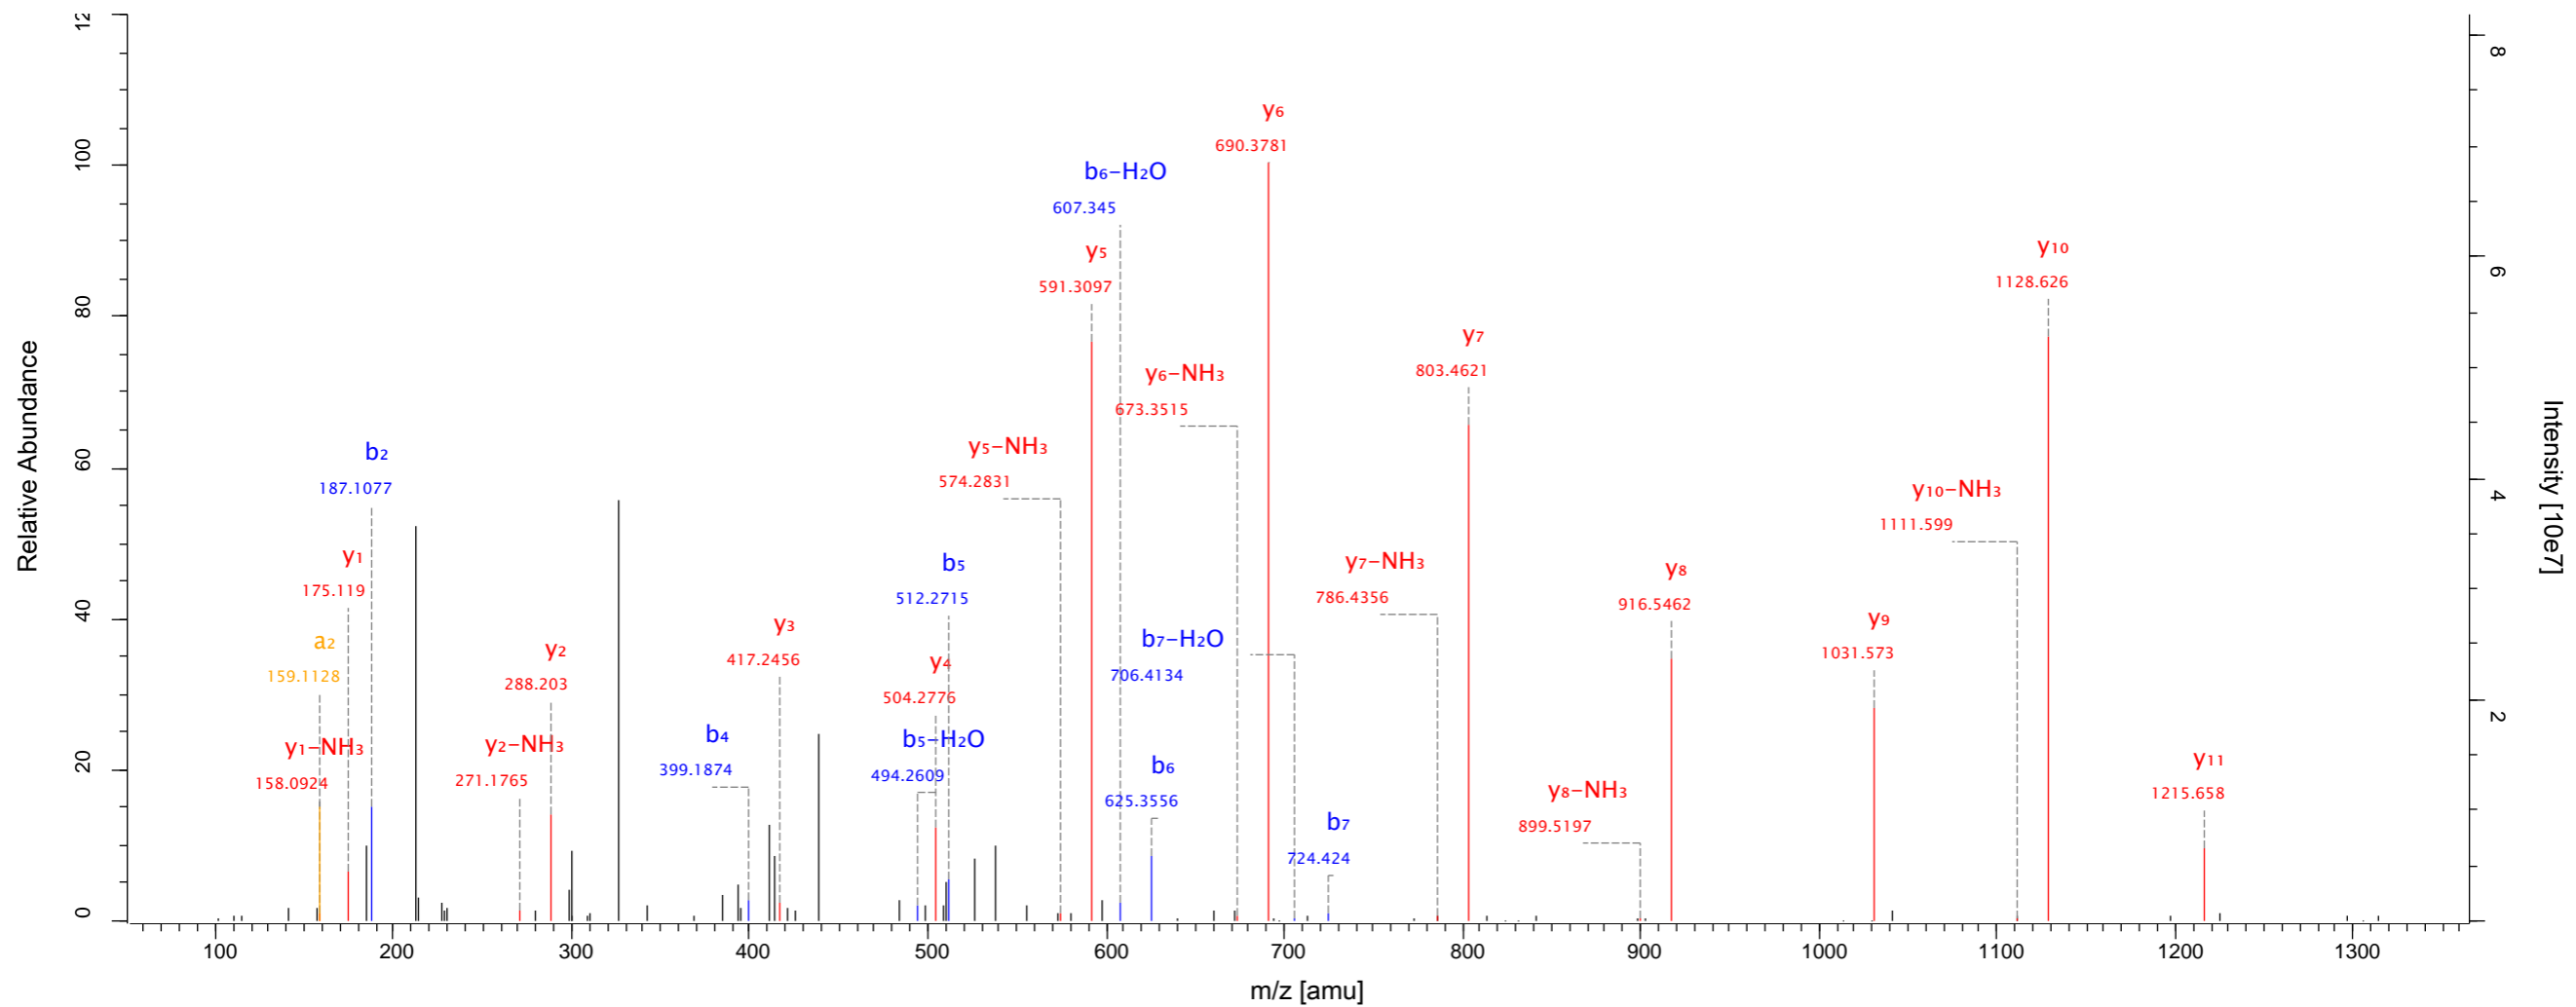



Raw file: 20111212\_EXQ5\_AnMi\_QC\_HCMVp1\_21

Scan number: 56117

Protein: ORFL321W + NC\_006273.2[191968,194126]+ <unknown description>; ORFL321W.iORF1 + NC\_006273.2[191968,194126]+ <unknown description>; ORFL321W.iORF4 + NC\_006273.2[193200,194126]+ <unknown description>

Peptide score: 211.46

Method: FTMS; HCD

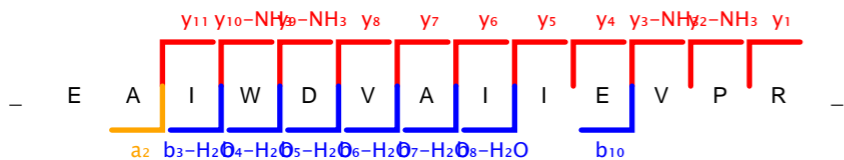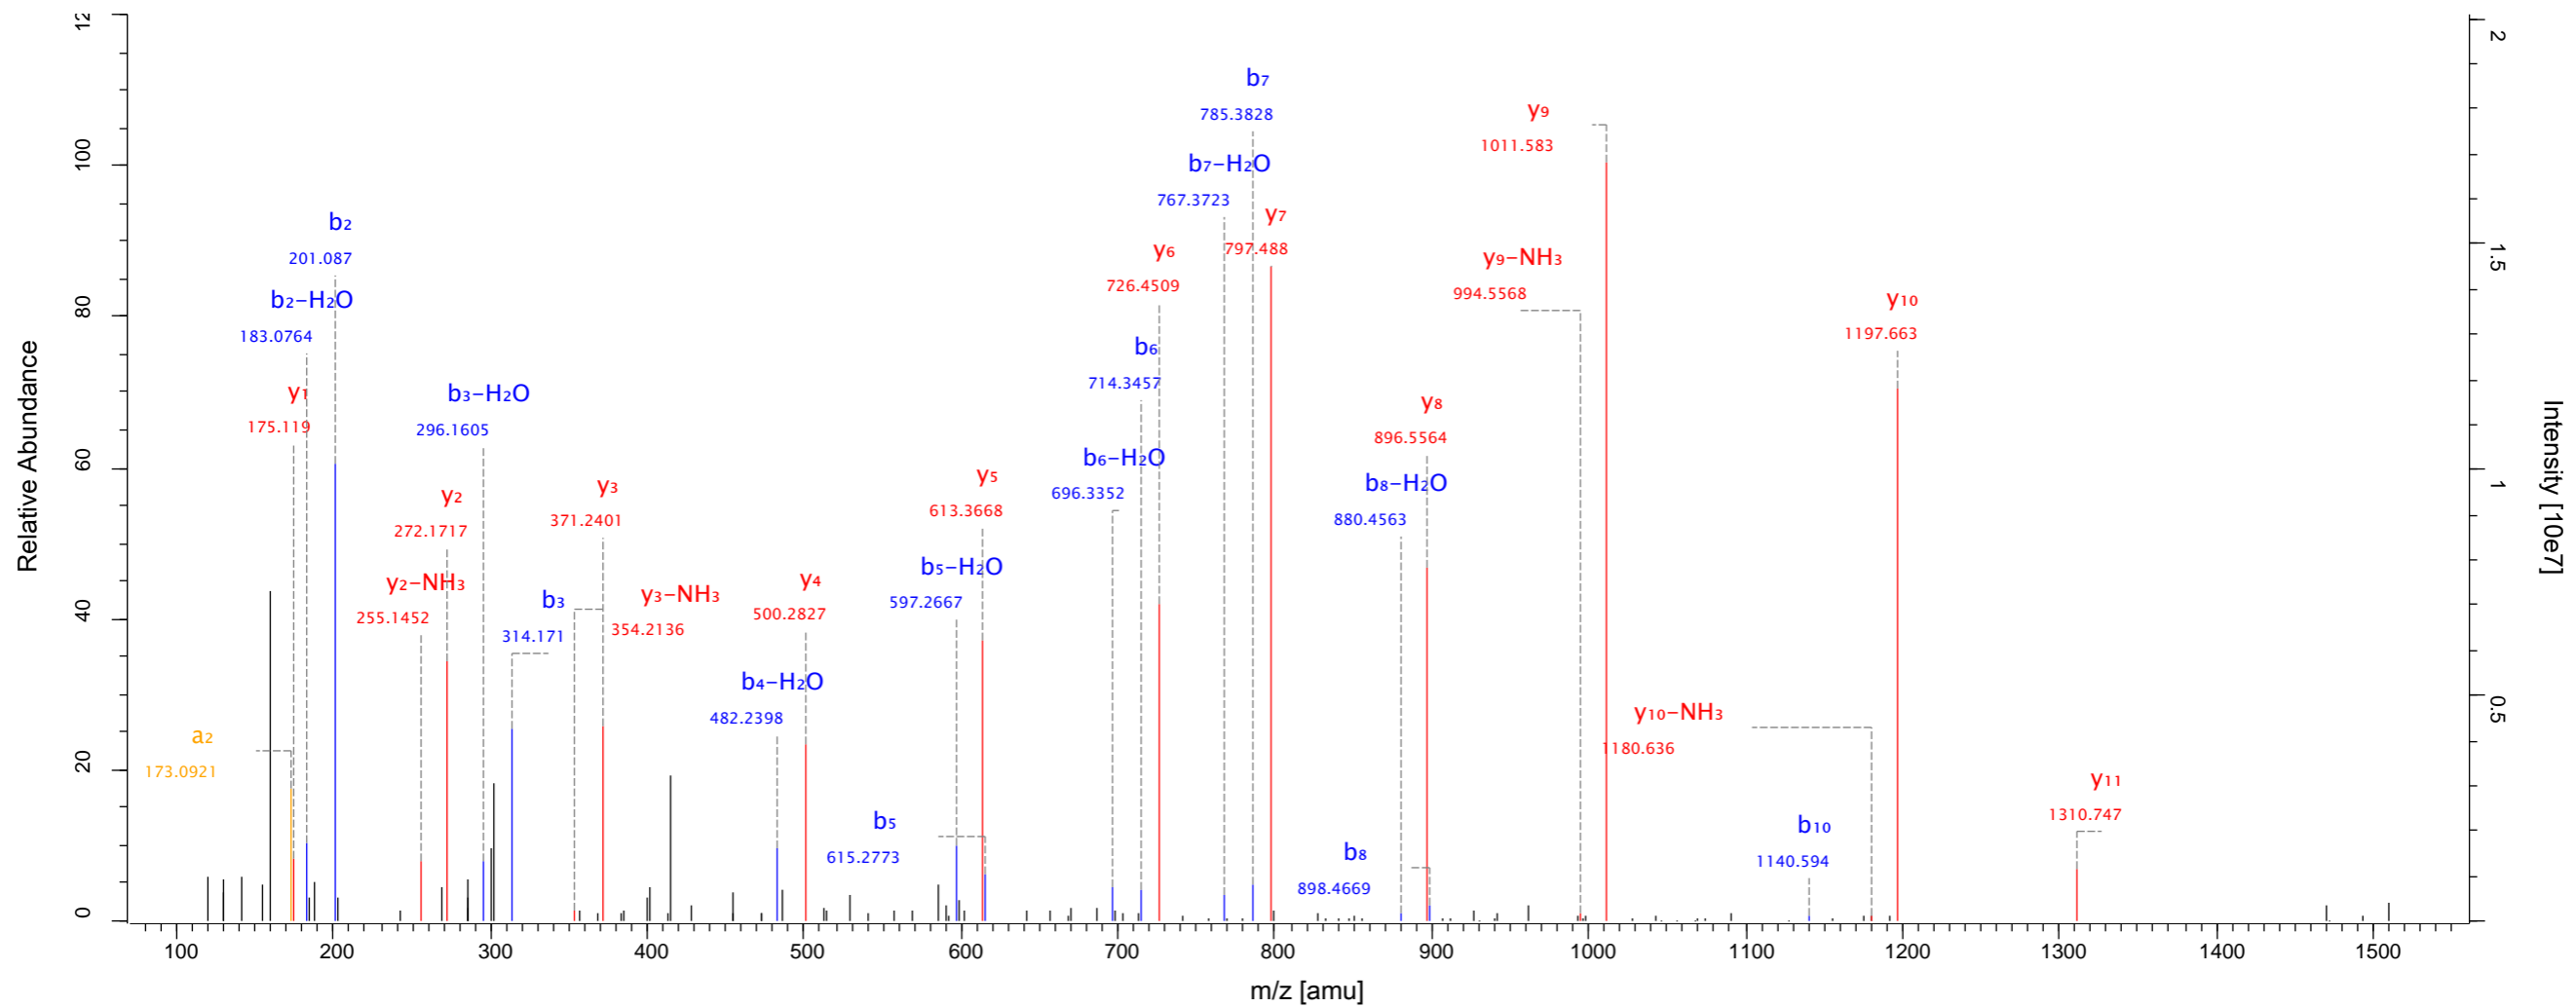

Raw file: 20111212\_EXQ5\_AnMi\_QC\_HCMVp1\_23  
 Scan number: 16410  
 Protein: ORFL147C - NC\_006273.2[85932,87362]- <unknown description>  
 Peptide score: 94.69  
 Method: FTMS; HCD

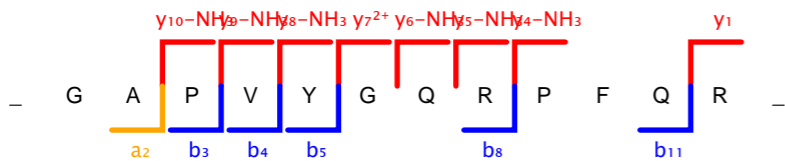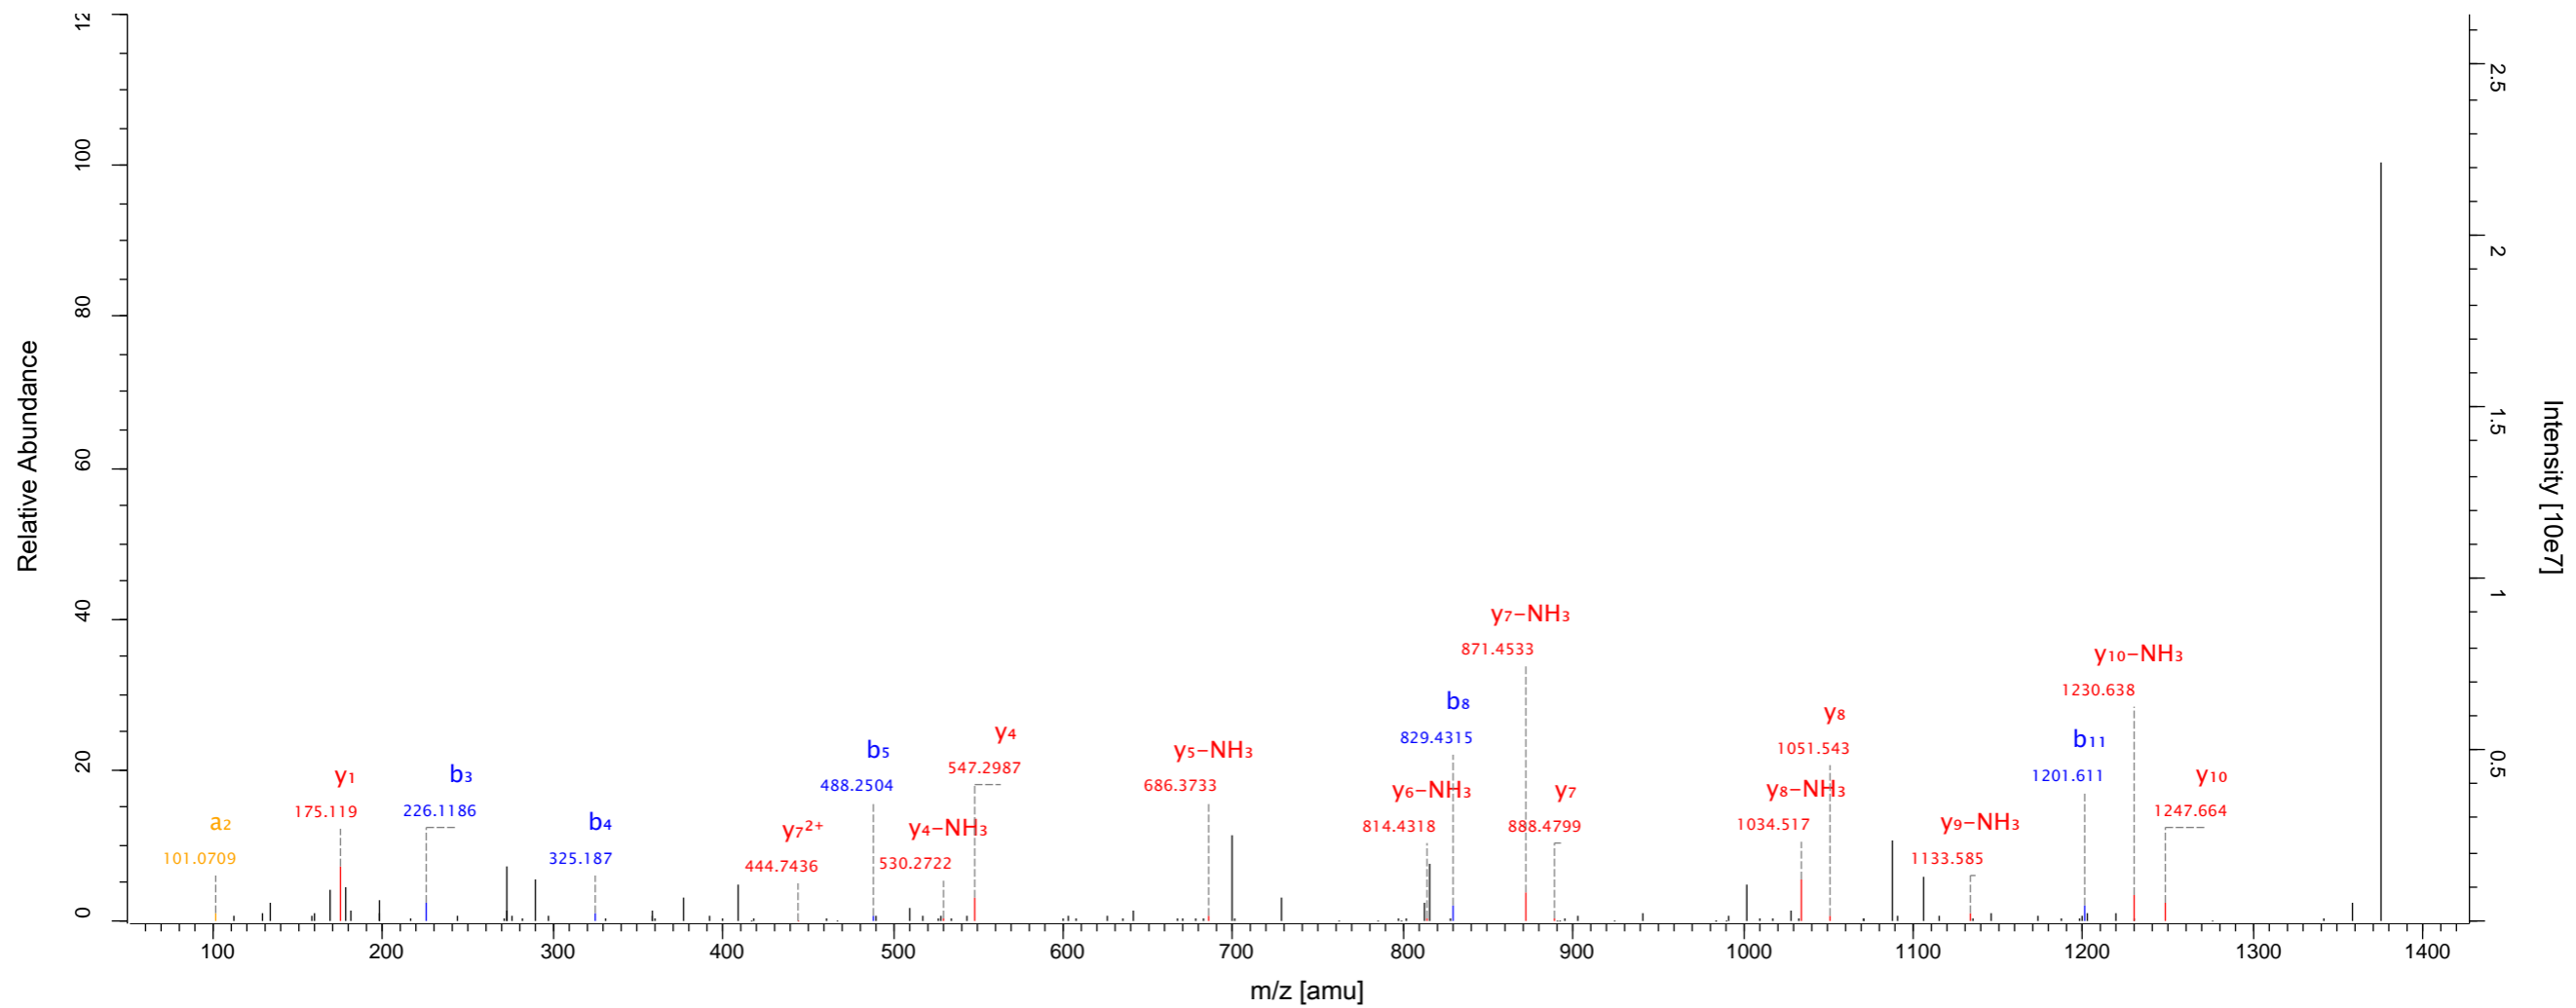

Raw file: 20111212\_EXQ5\_AnMi\_QC\_HCMVp1\_23  
Scan number: 18985  
Protein: ORFL147C - NC\_006273.2[85932,87362]- <unknown description>  
Peptide score: 142.11  
Method: FTMS; HCD

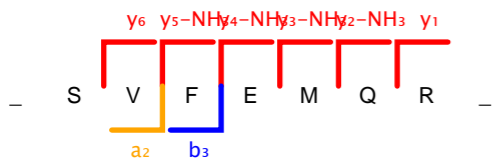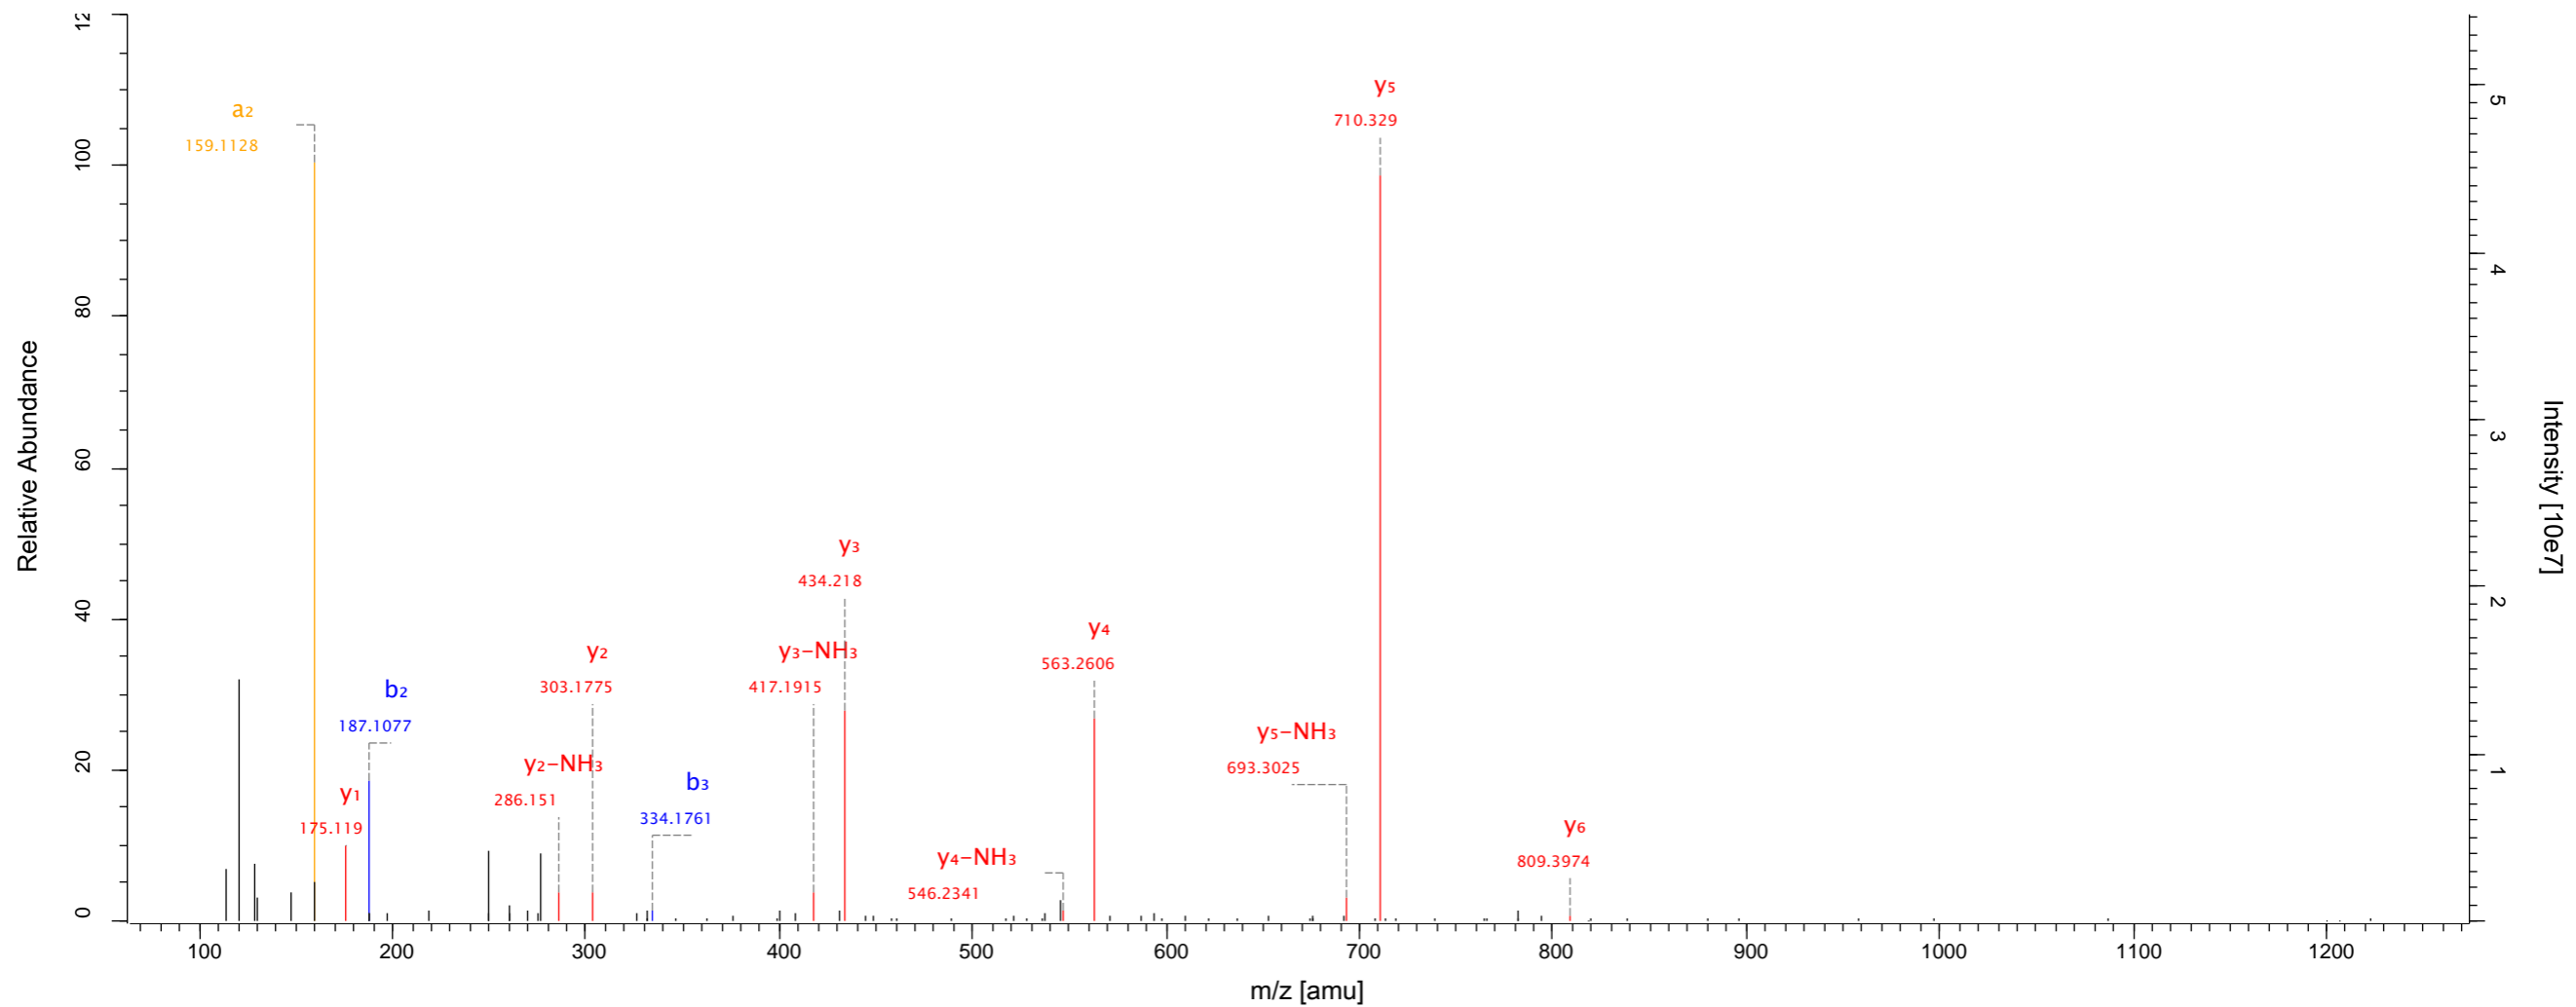

Raw file: 20111212\_EXQ5\_AnMi\_QC\_HCMVp1\_23  
Scan number: 5525  
Protein: ORFL147C - NC\_006273.2[85932,87362]- <unknown description>  
Peptide score: 122.69  
Method: FTMS; HCD

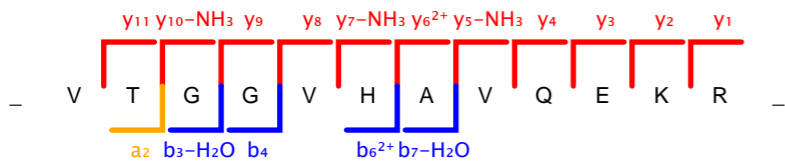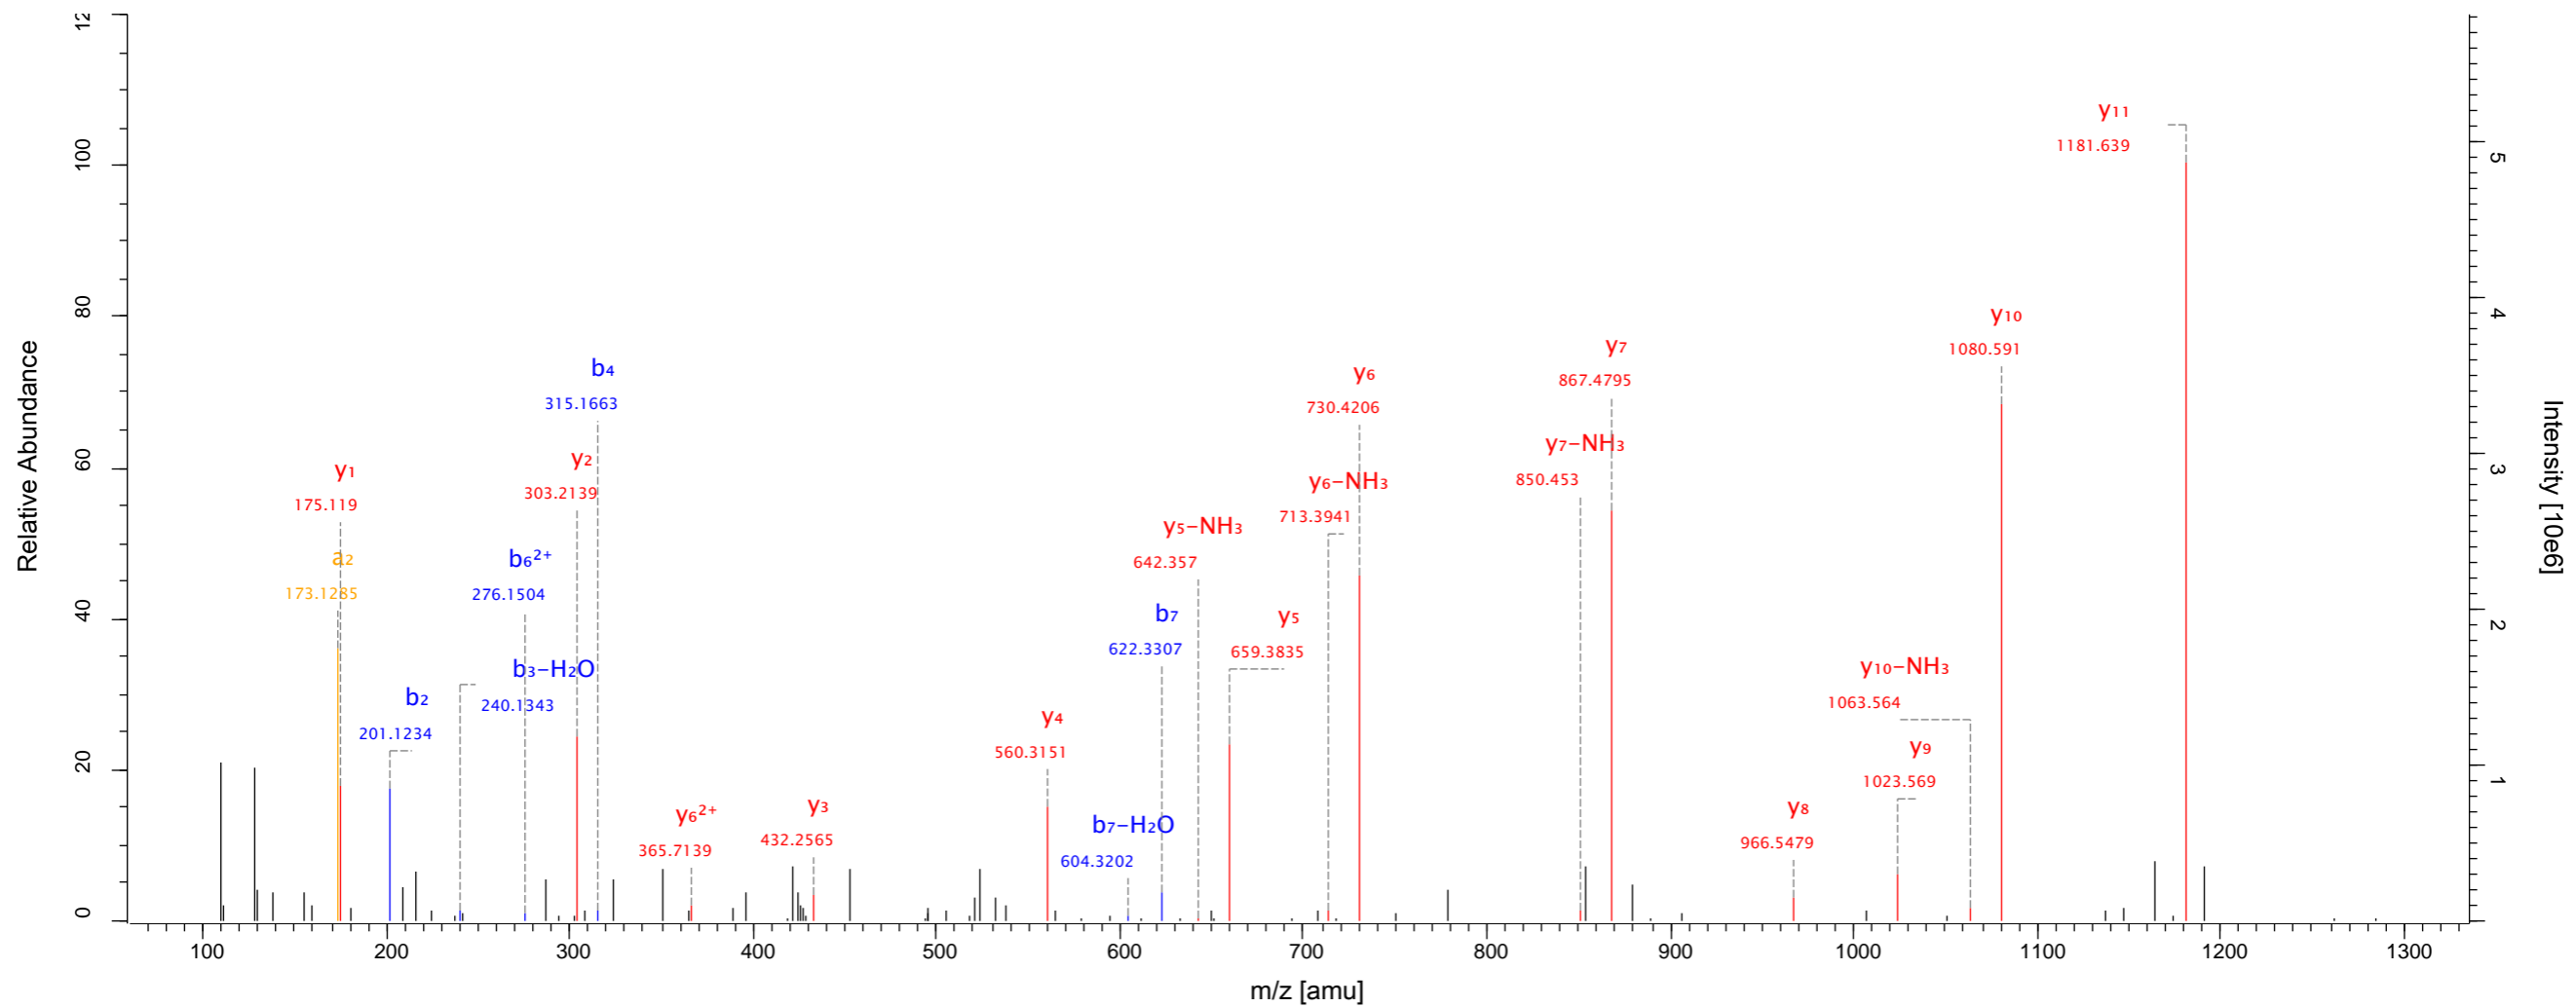

Raw file: 20111212\_EXQ5\_AnMi\_QC\_HCMVp11\_23  
Scan number: 6153  
Protein: ORFL87W + NC\_006273.2[38099,40114]+ <unknown description>  
Peptide score: 159.4  
Method: FTMS; HCD

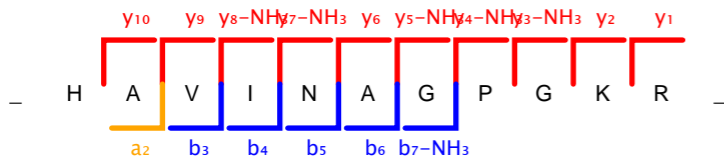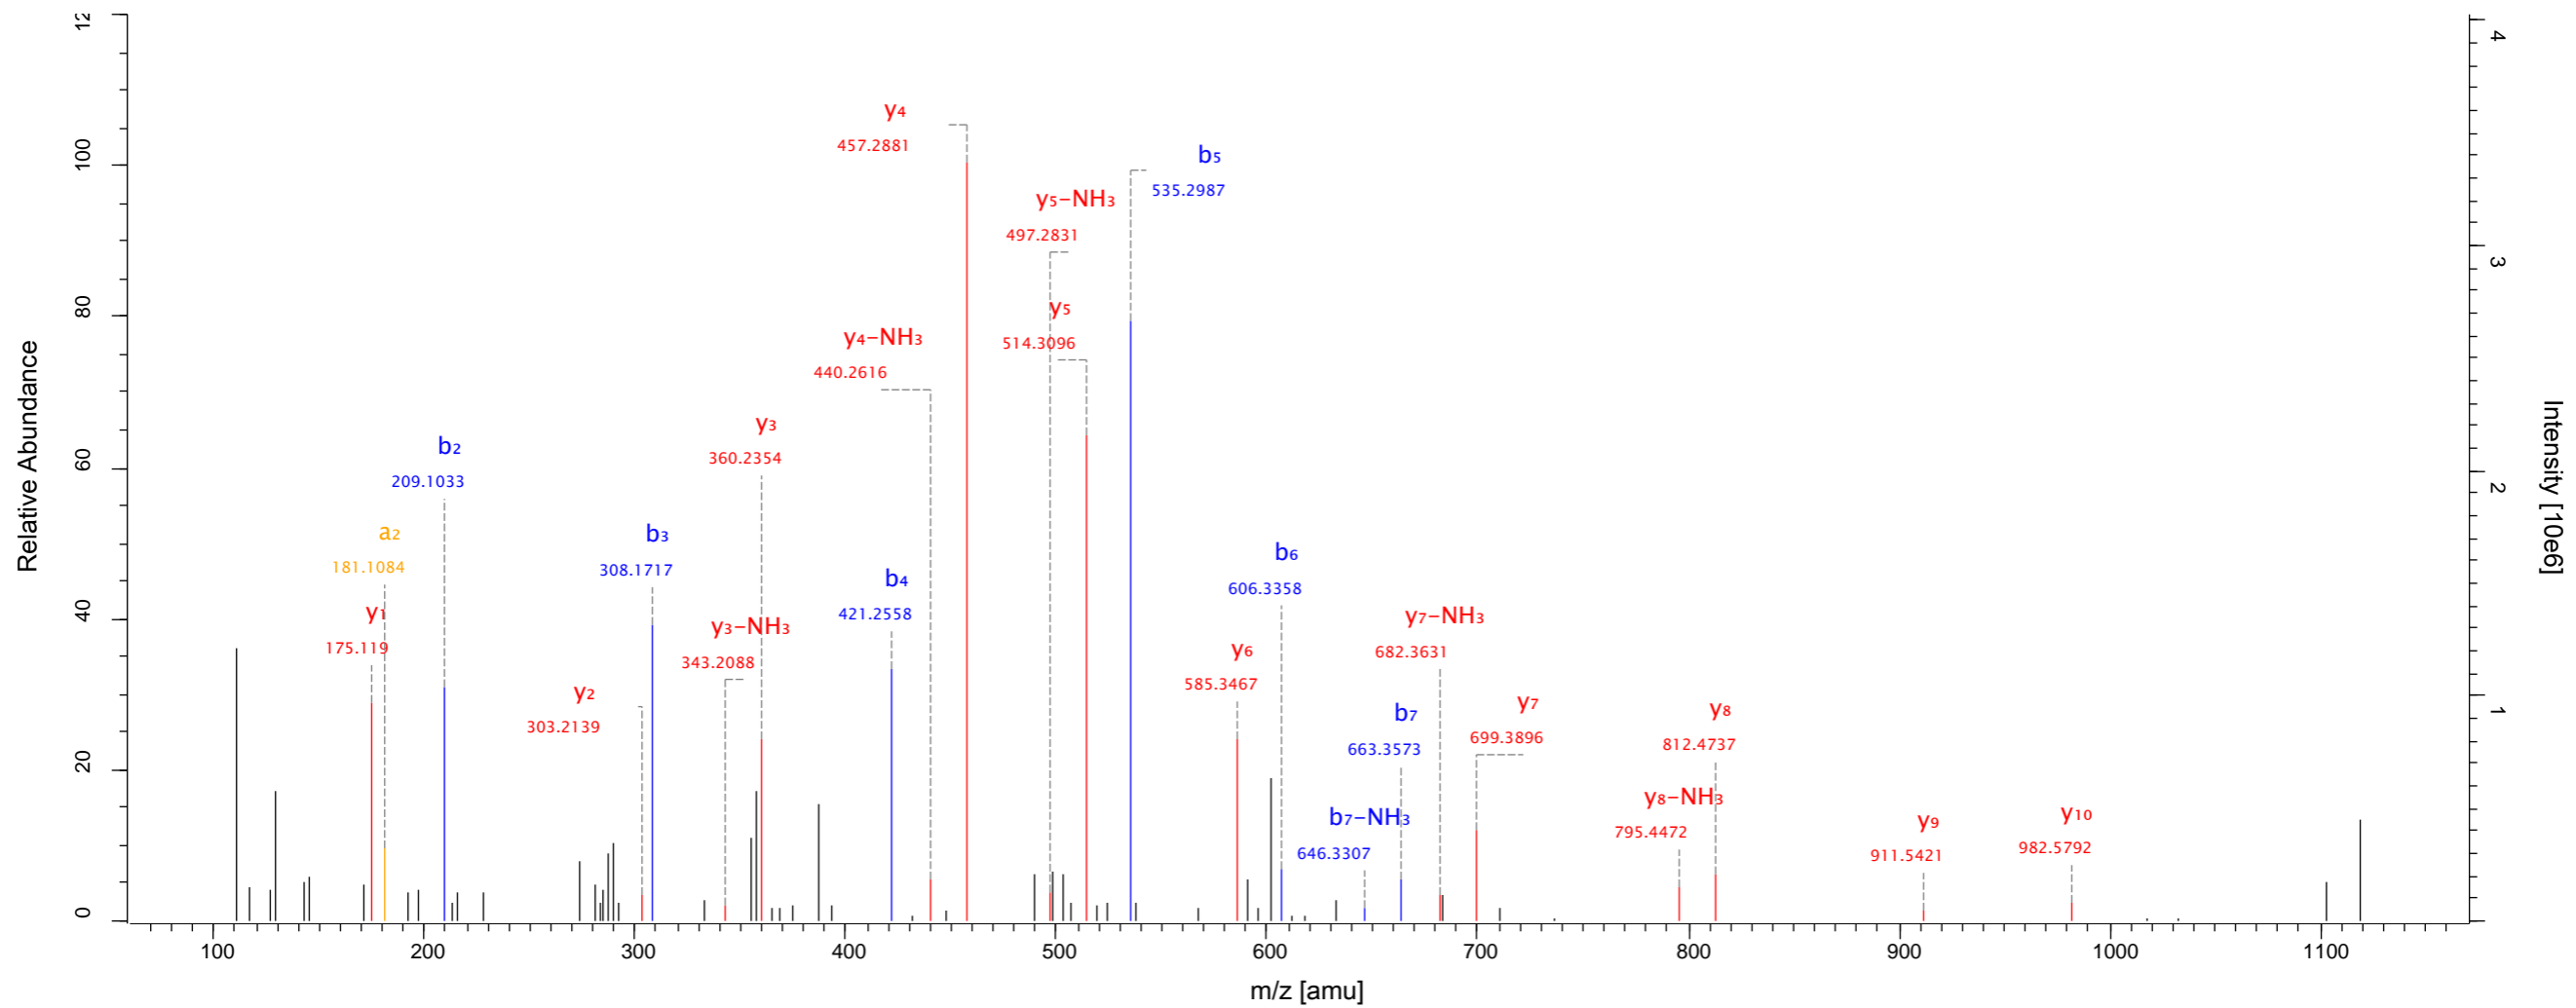

Raw file: 20111212\_EXQ5\_AnMi\_QC\_HCMVp1\_23  
Scan number: 6232  
Protein: ORFL147C - NC\_006273.2[85932,87362]- <unknown description>  
Peptide score: 83.42  
Method: FTMS; HCD

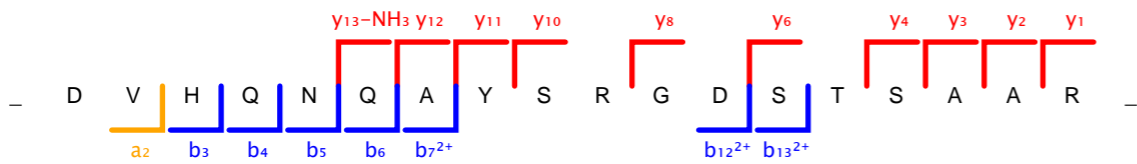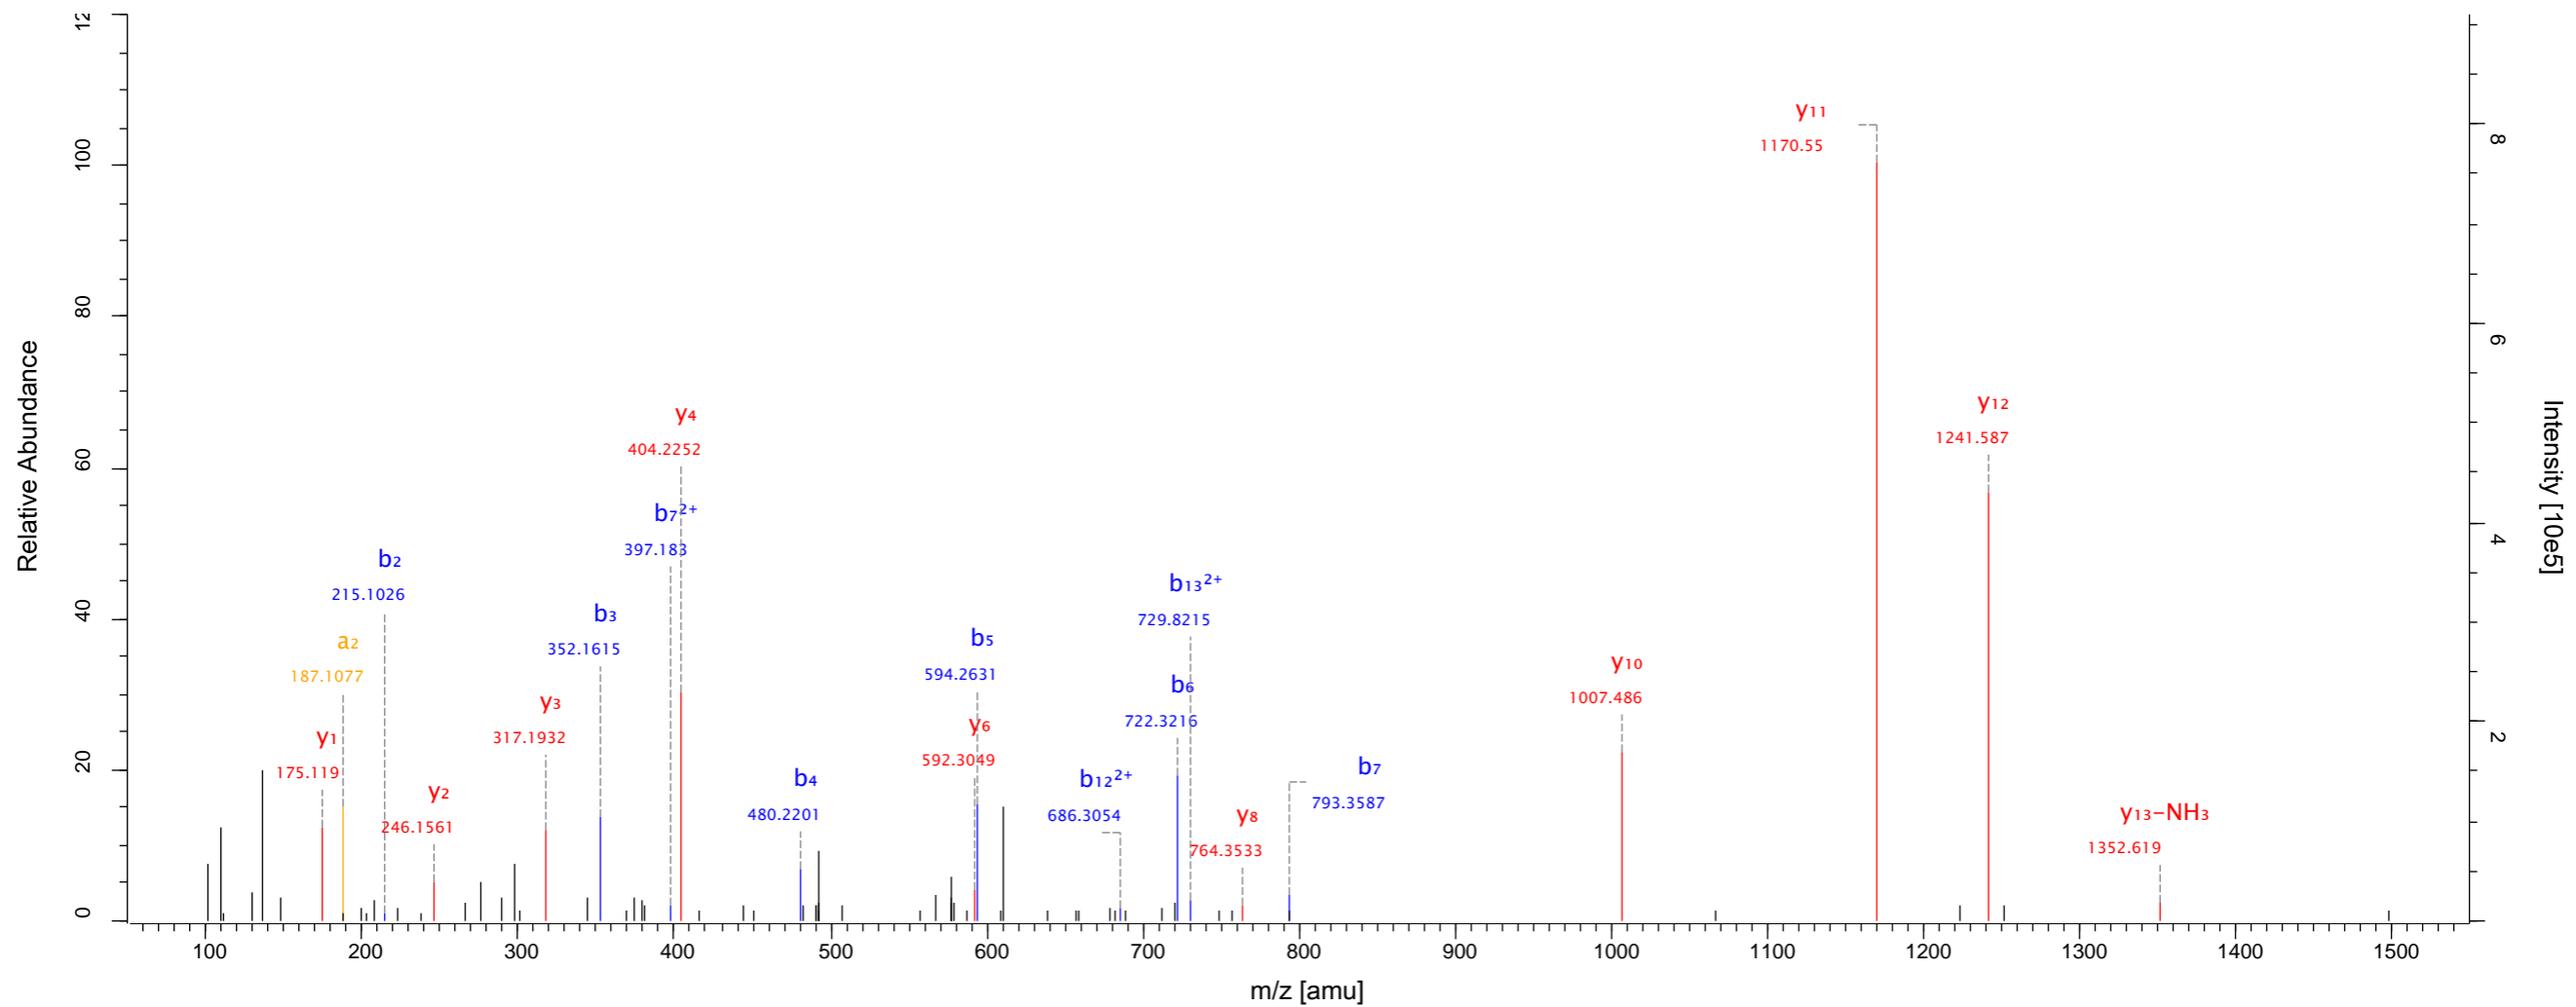

Raw file: 20111212\_EXQ5\_AnMi\_QC\_HCMVp11\_23  
 Scan number: 7014  
 Protein: ORFL147C - NC\_006273.2[85932,87362]- <unknown description>  
 Peptide score: 131.35  
 Method: FTMS; HCD

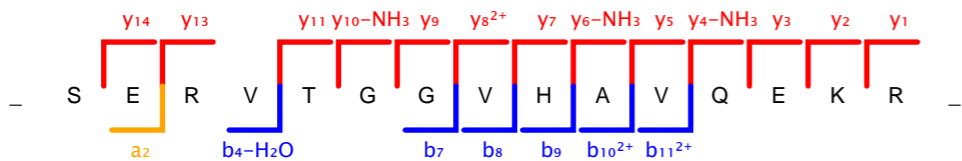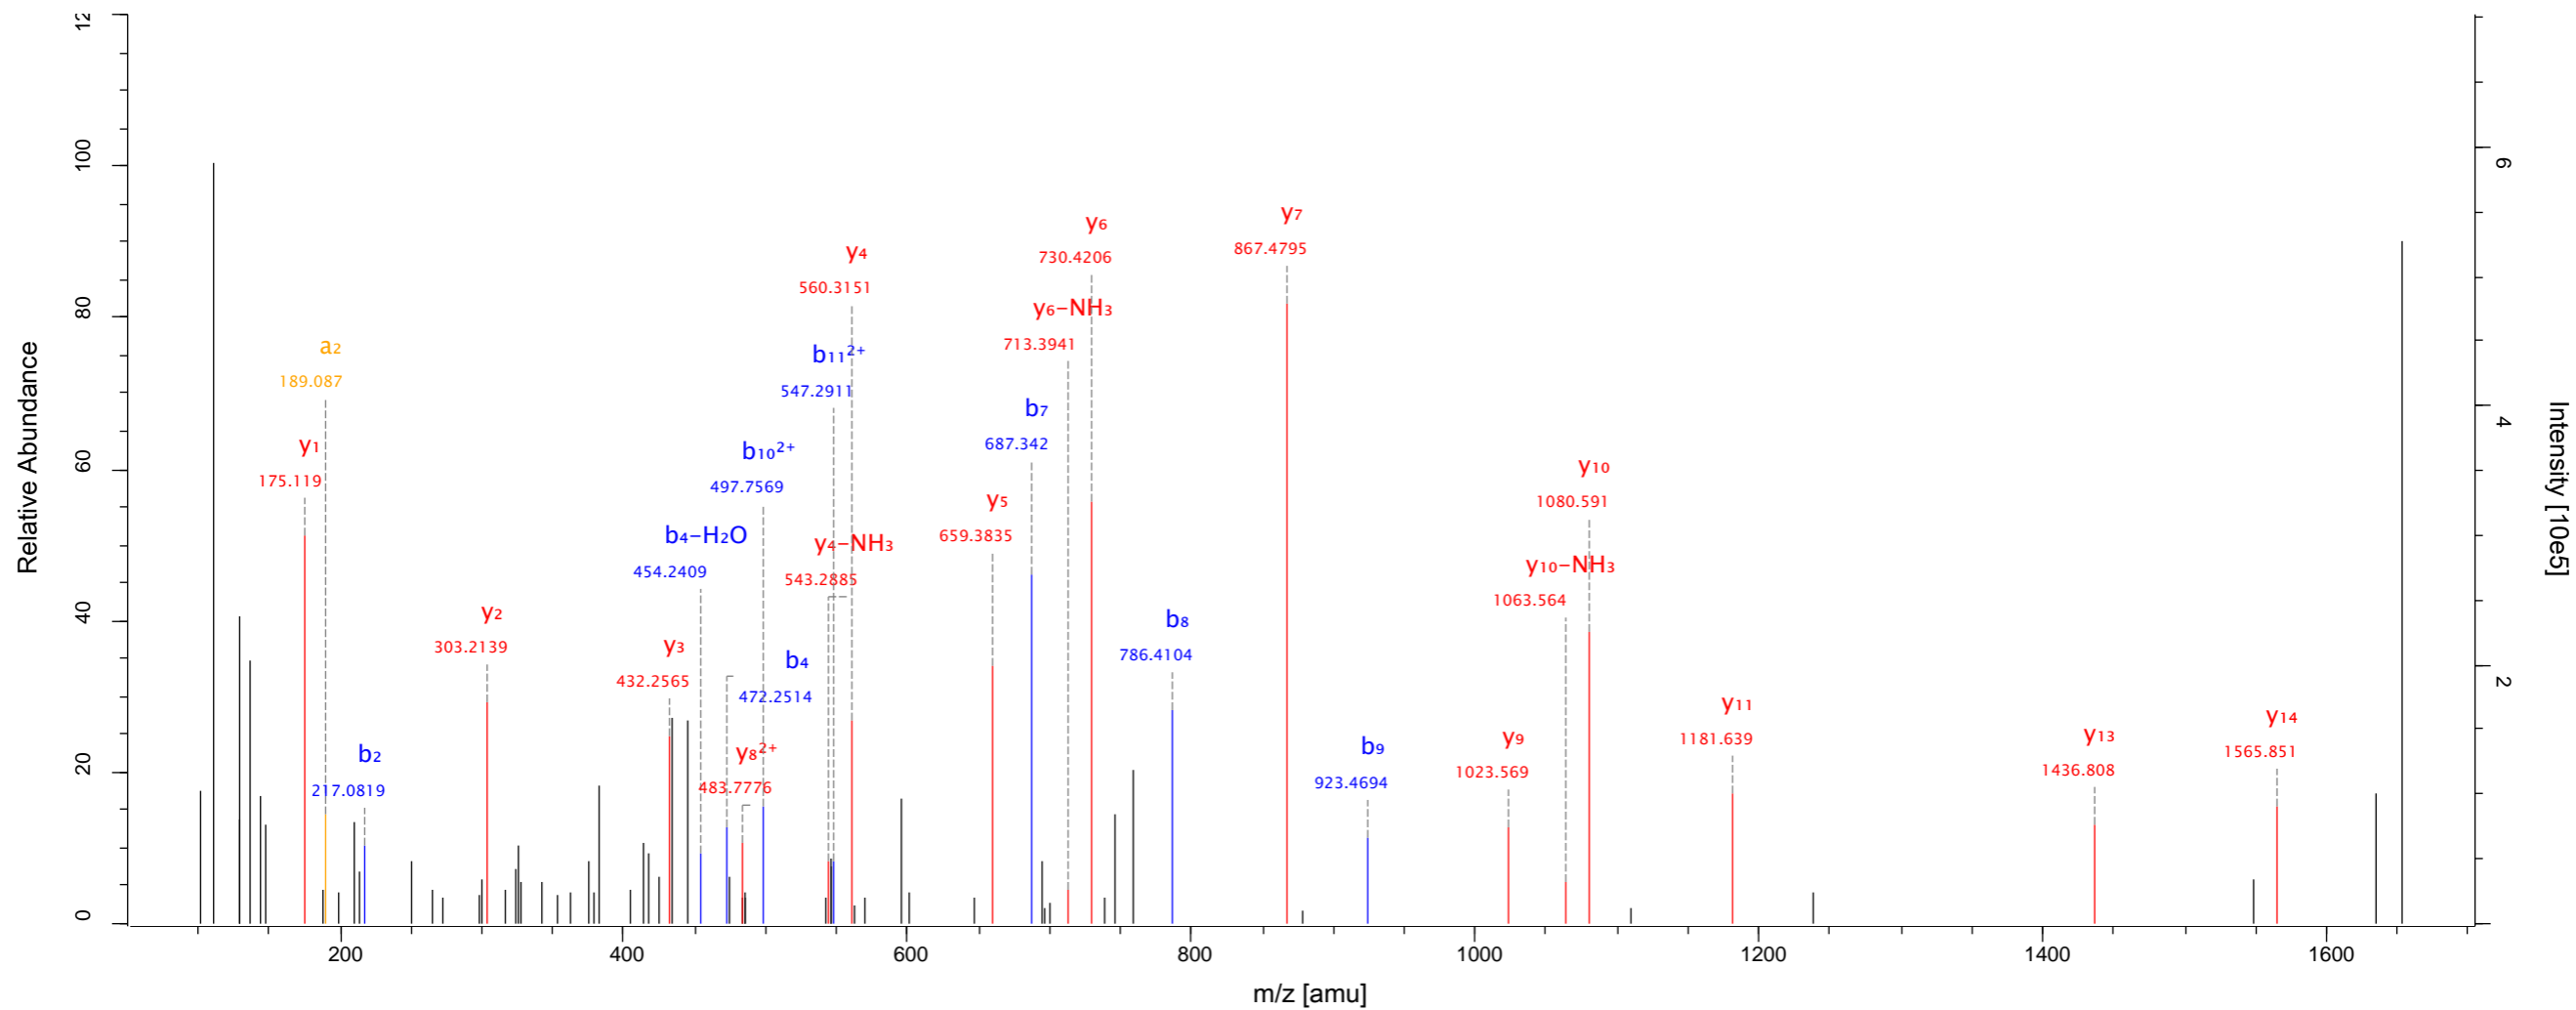

Raw file: 20111212\_EXQ5\_AnMi\_QC\_HCMVp11\_23  
 Scan number: 7564  
 Protein: ORFL147C - NC\_006273.2[85932,87362]- <unknown description>  
 Peptide score: 114.89  
 Method: FTMS; HCD

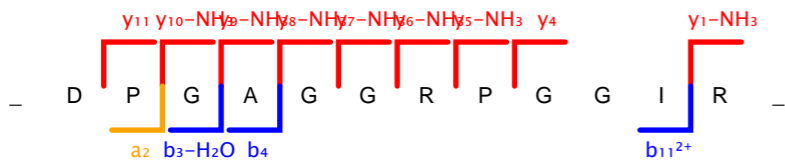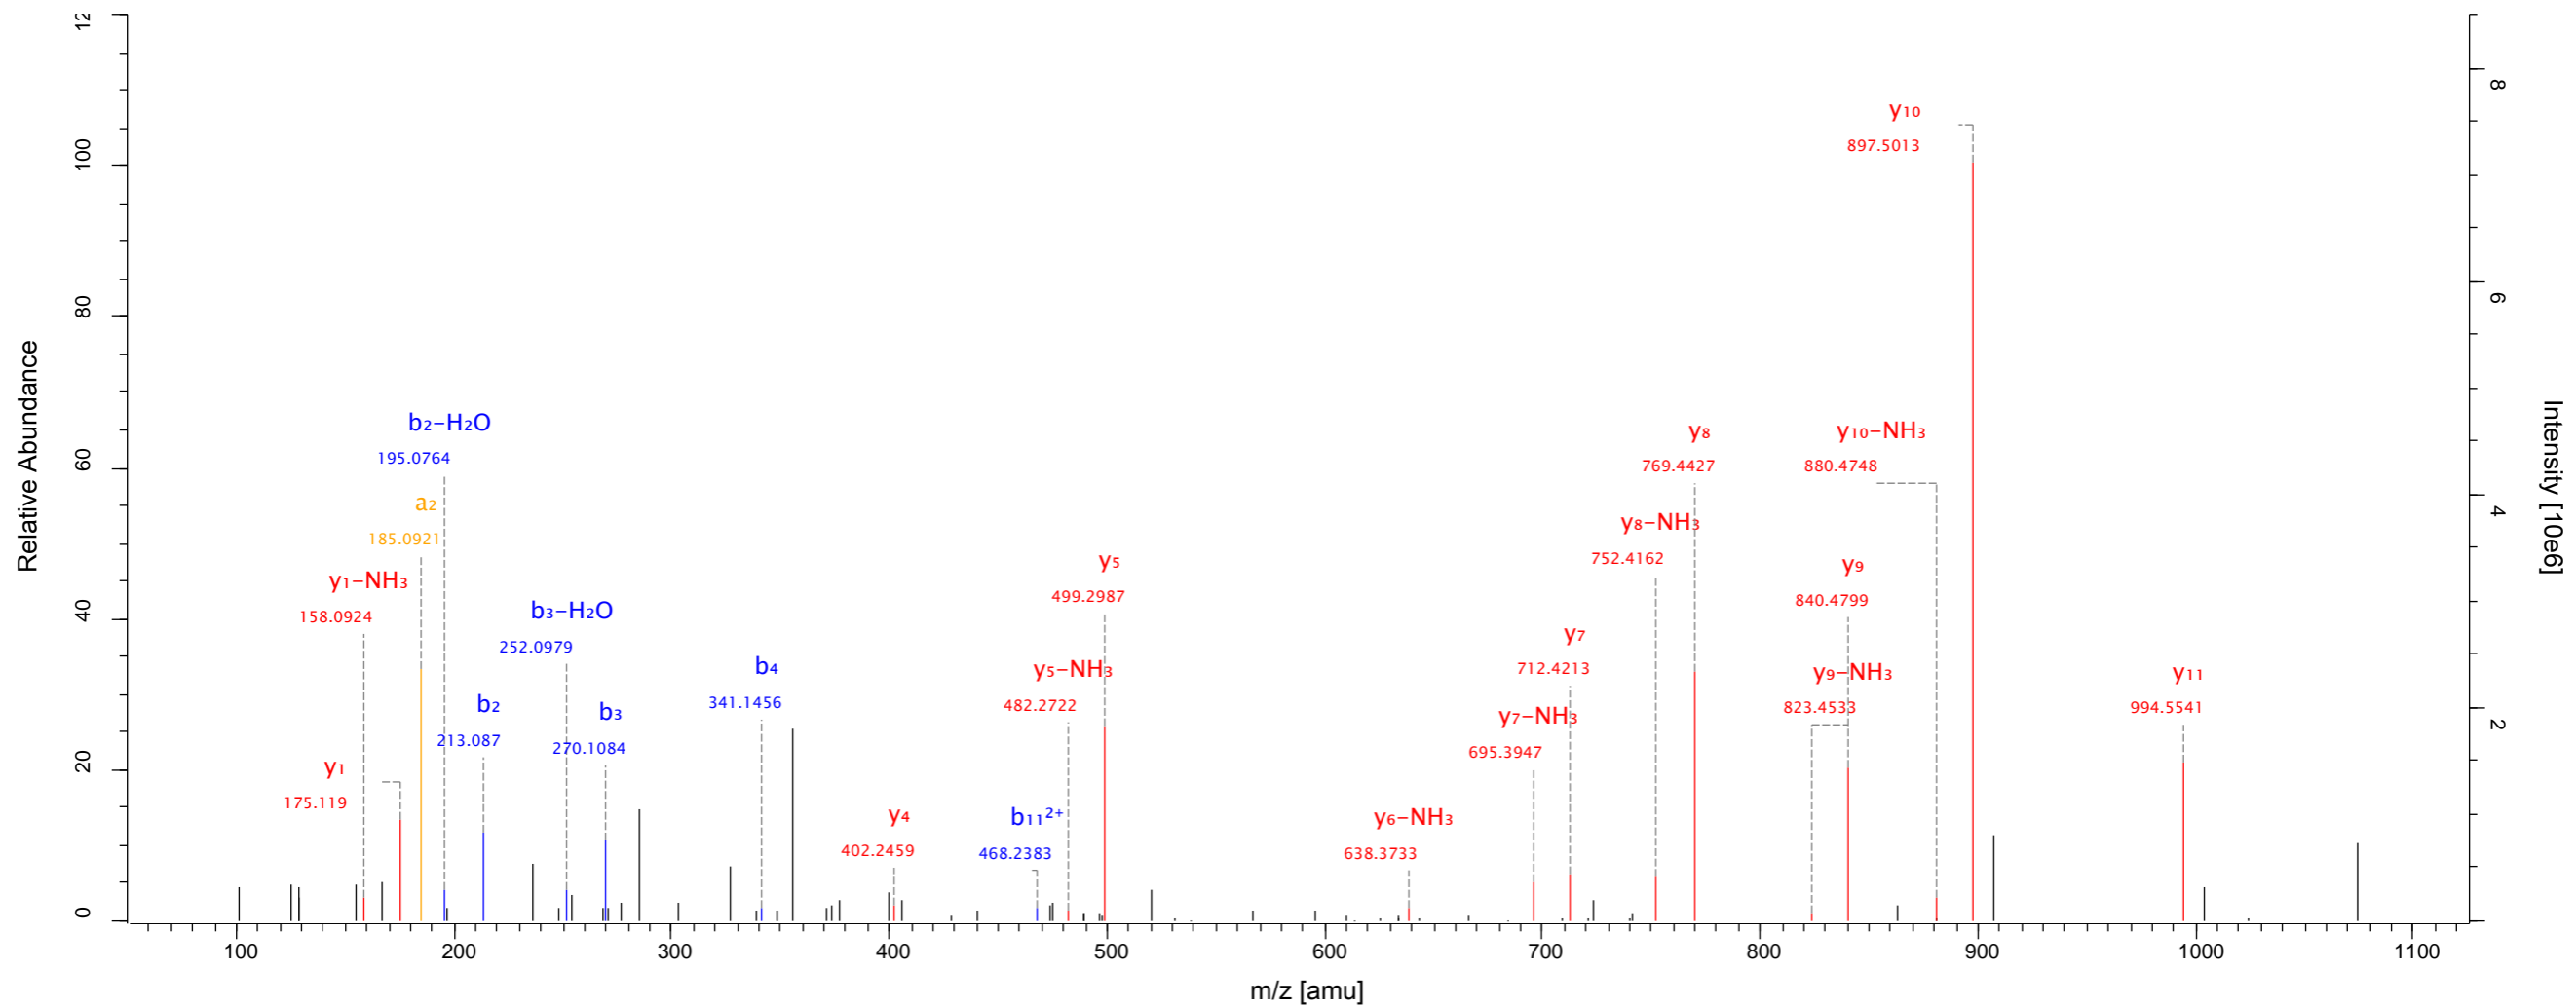



Raw file: 20111212\_EXQ5\_AnMi\_QC\_HCMVp11\_23  
Scan number: 9504  
Protein: ORFL87W + NC\_006273.2[38099,40114]+ <unknown description>  
Peptide score: 67.17  
Method: FTMS; HCD

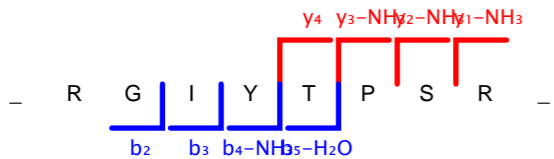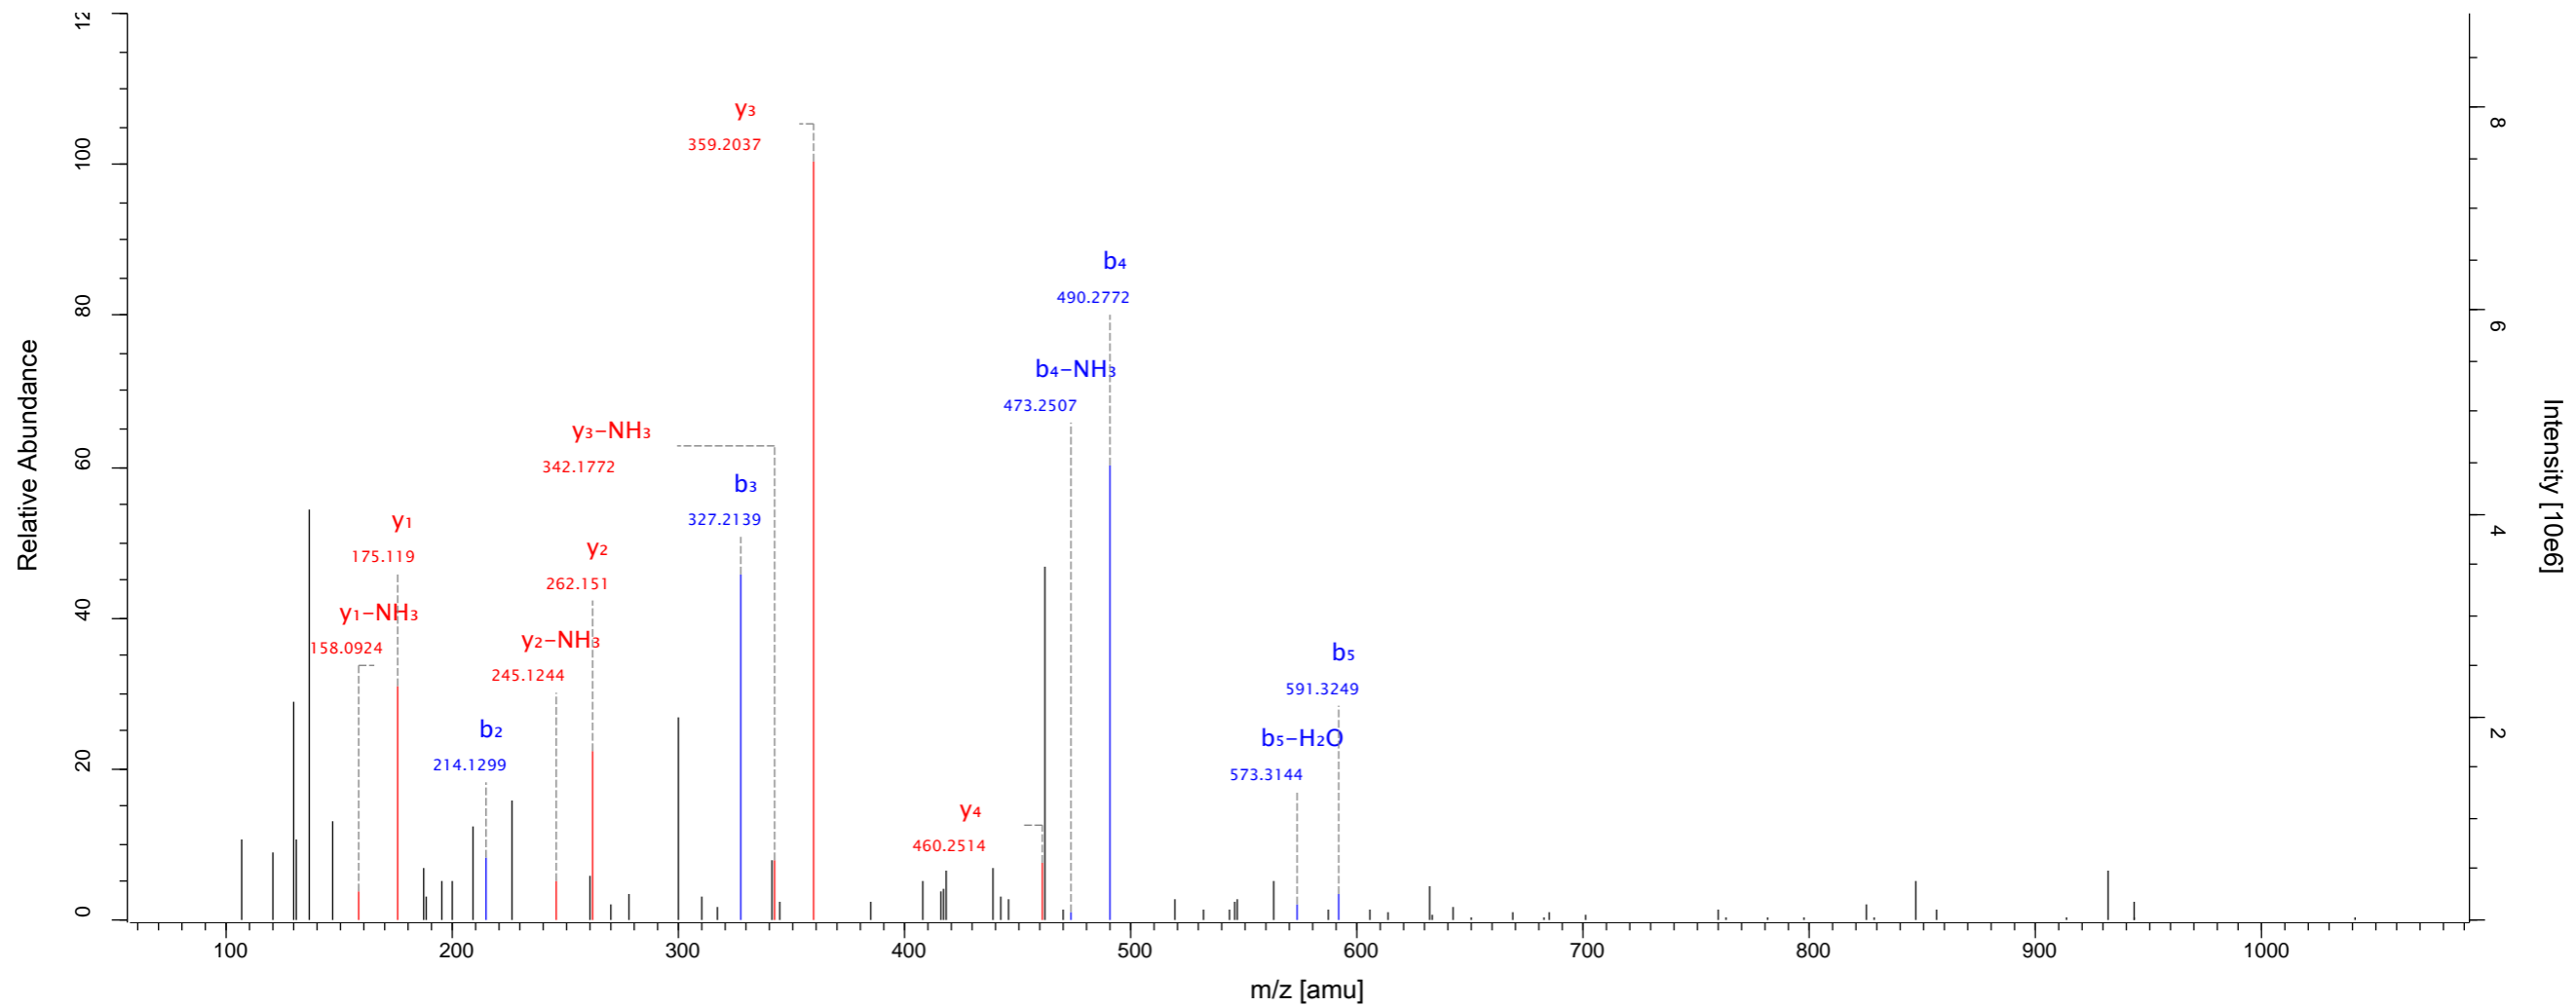

Raw file: 20111212\_EXQ5\_AnMi\_QC\_HCMVp1\_3  
 Scan number: 10699  
 Protein: ORFL130W + NC\_006273.2[72313,72744]+ <unknown description>  
 Peptide score: 208.25  
 Method: FTMS; HCD

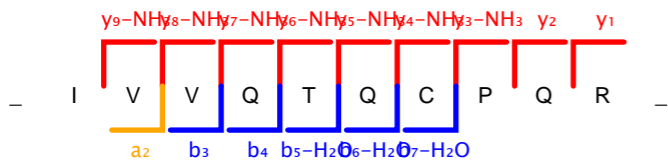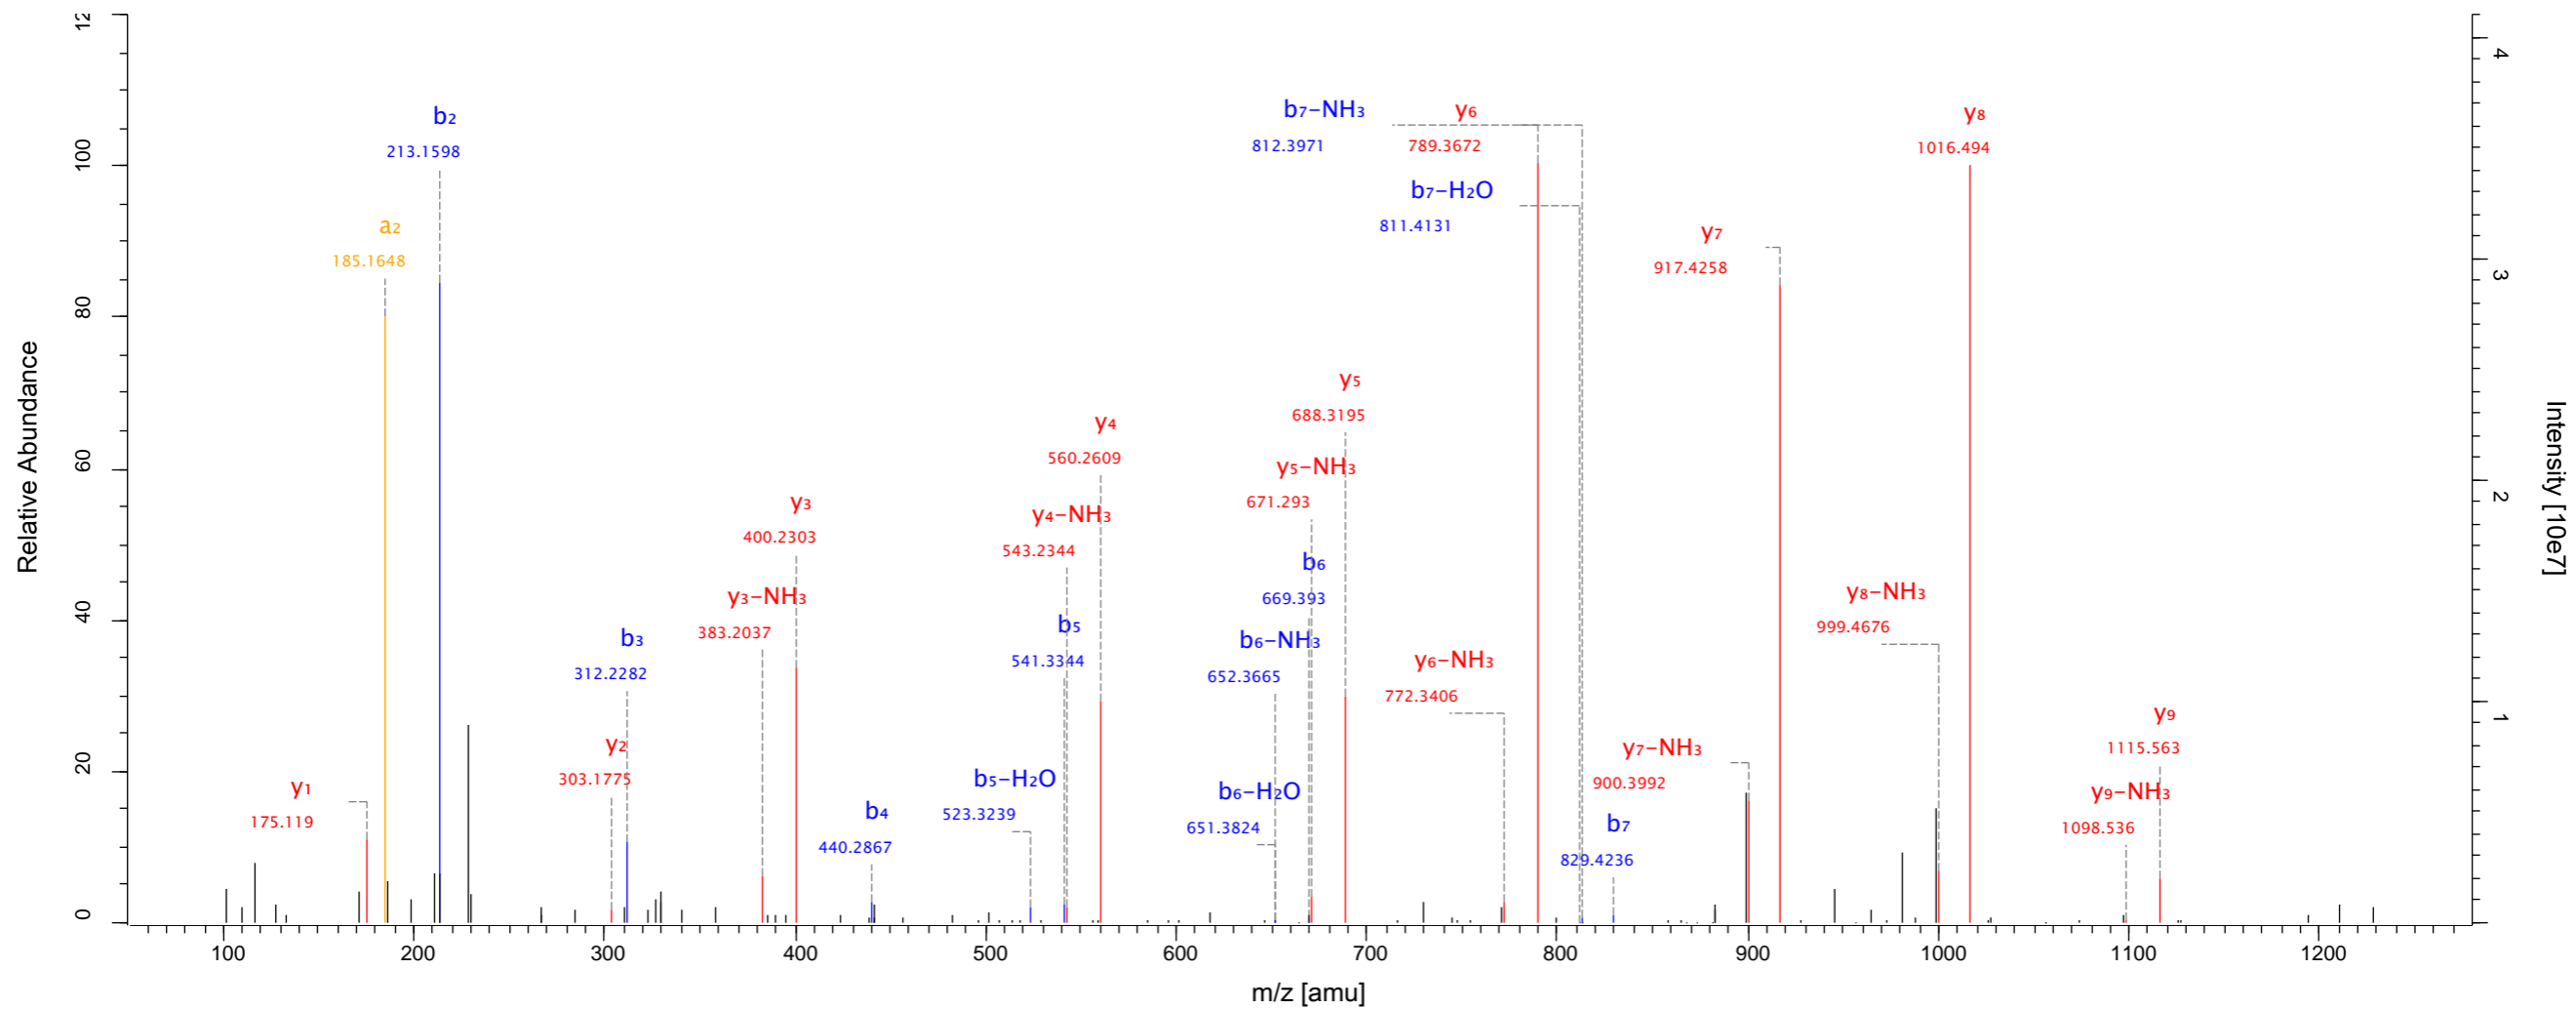

Raw file: 20111212\_EXQ5\_AnMi\_QC\_HCMVp1\_3  
 Scan number: 11917  
 Protein: ORFL119C - NC\_006273.2[63363,63800]- <unknown description>  
 Peptide score: 168.26  
 Method: FTMS; HCD

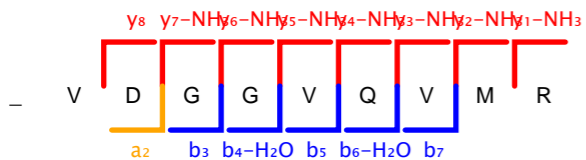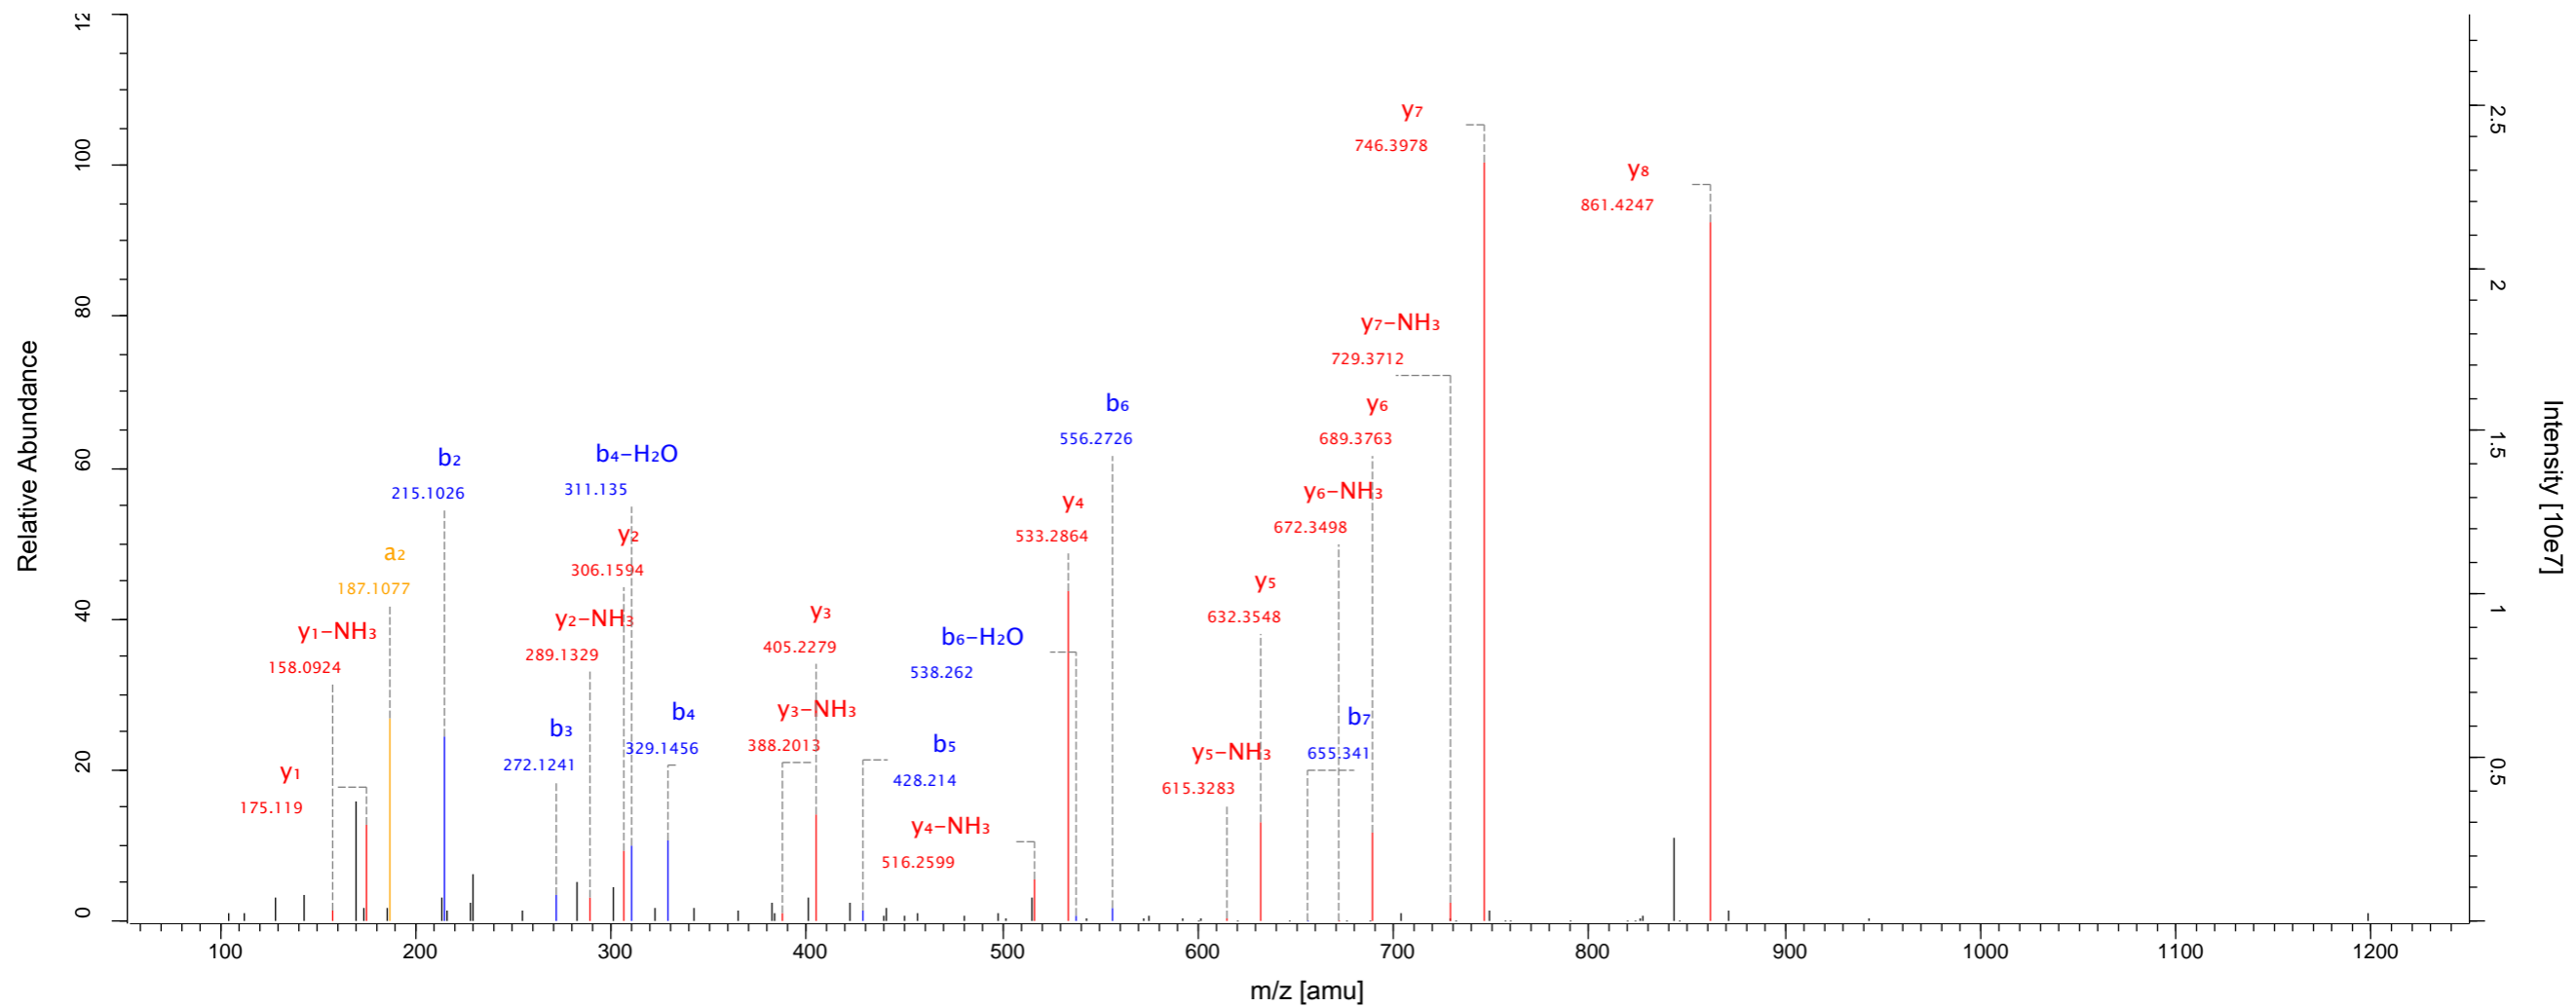

Raw file: 20111212\_EXQ5\_AnMi\_QC\_HCMVp1\_3  
 Scan number: 14877  
 Protein: ORFL149C.iORF2 - NC\_006273.2[91004,91471]- <unknown description>  
 Peptide score: 142.91  
 Method: FTMS; HCD

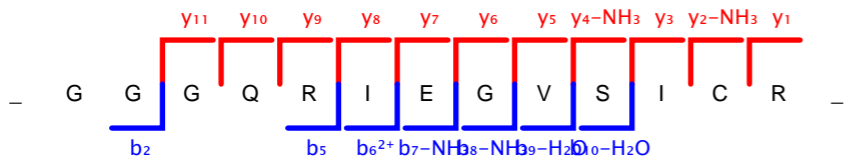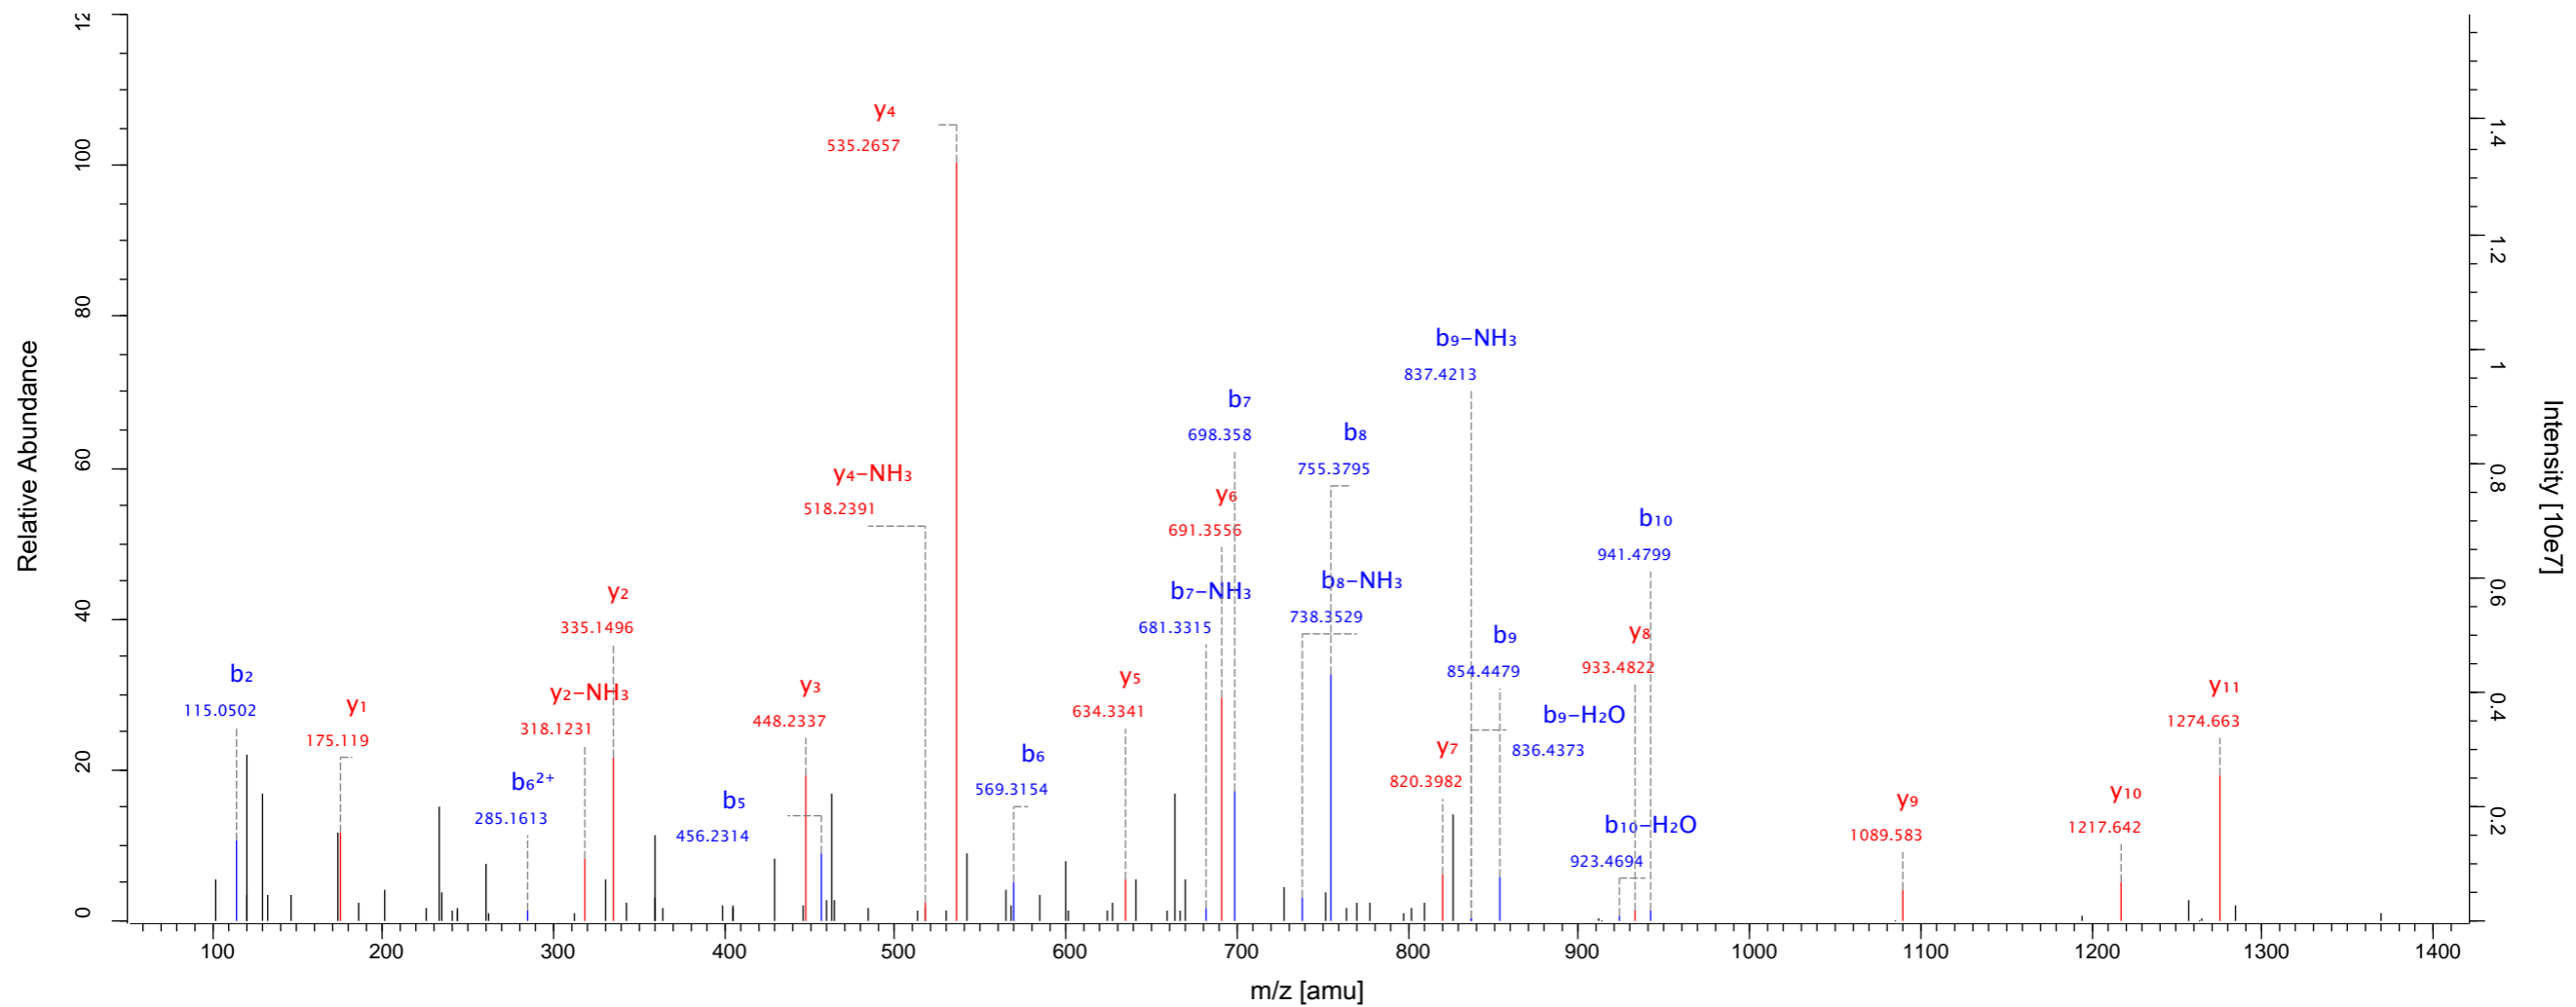

Raw file: 20111212\_EXQ5\_AnMi\_QC\_HCMVp1\_3  
 Scan number: 20296  
 Protein: ORFL86W + NC\_006273.2[38059,38538]+ <unknown description>  
 Peptide score: 138.25  
 Method: FTMS; HCD

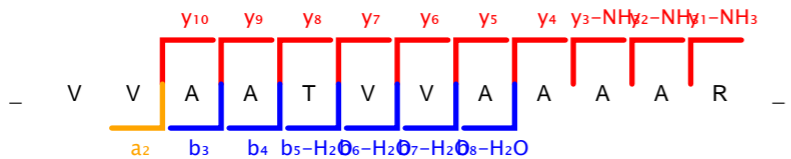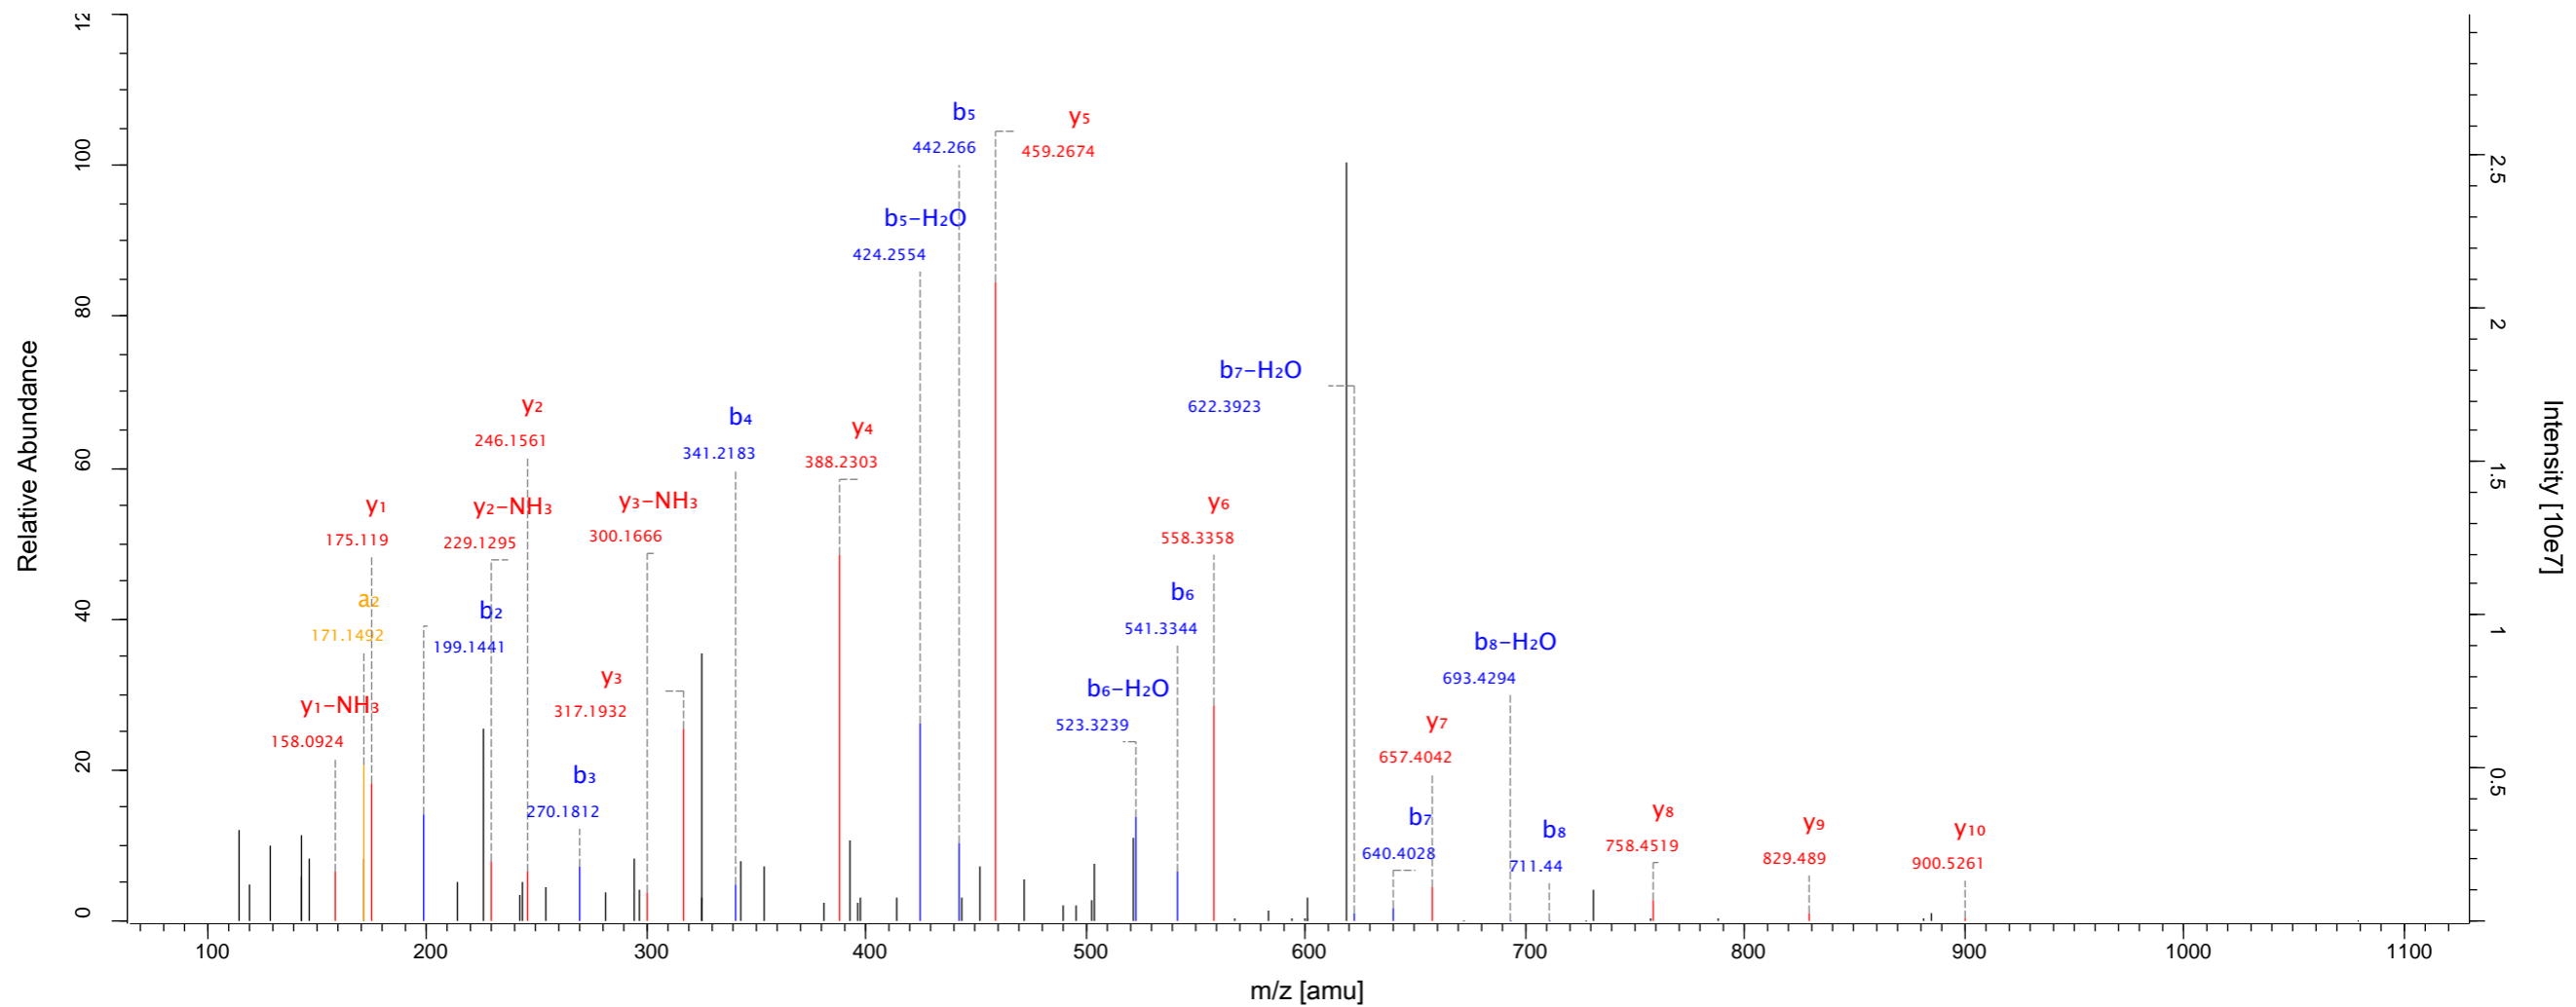

Raw file: 20111212\_EXQ5\_AnMi\_QC\_HCMVpl1\_3  
 Scan number: 21348  
 Protein: ORFL119C - NC\_006273.2[63363,63800]- <unknown description>  
 Peptide score: 181.76  
 Method: FTMS; HCD

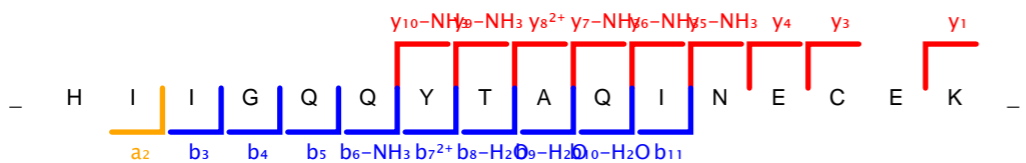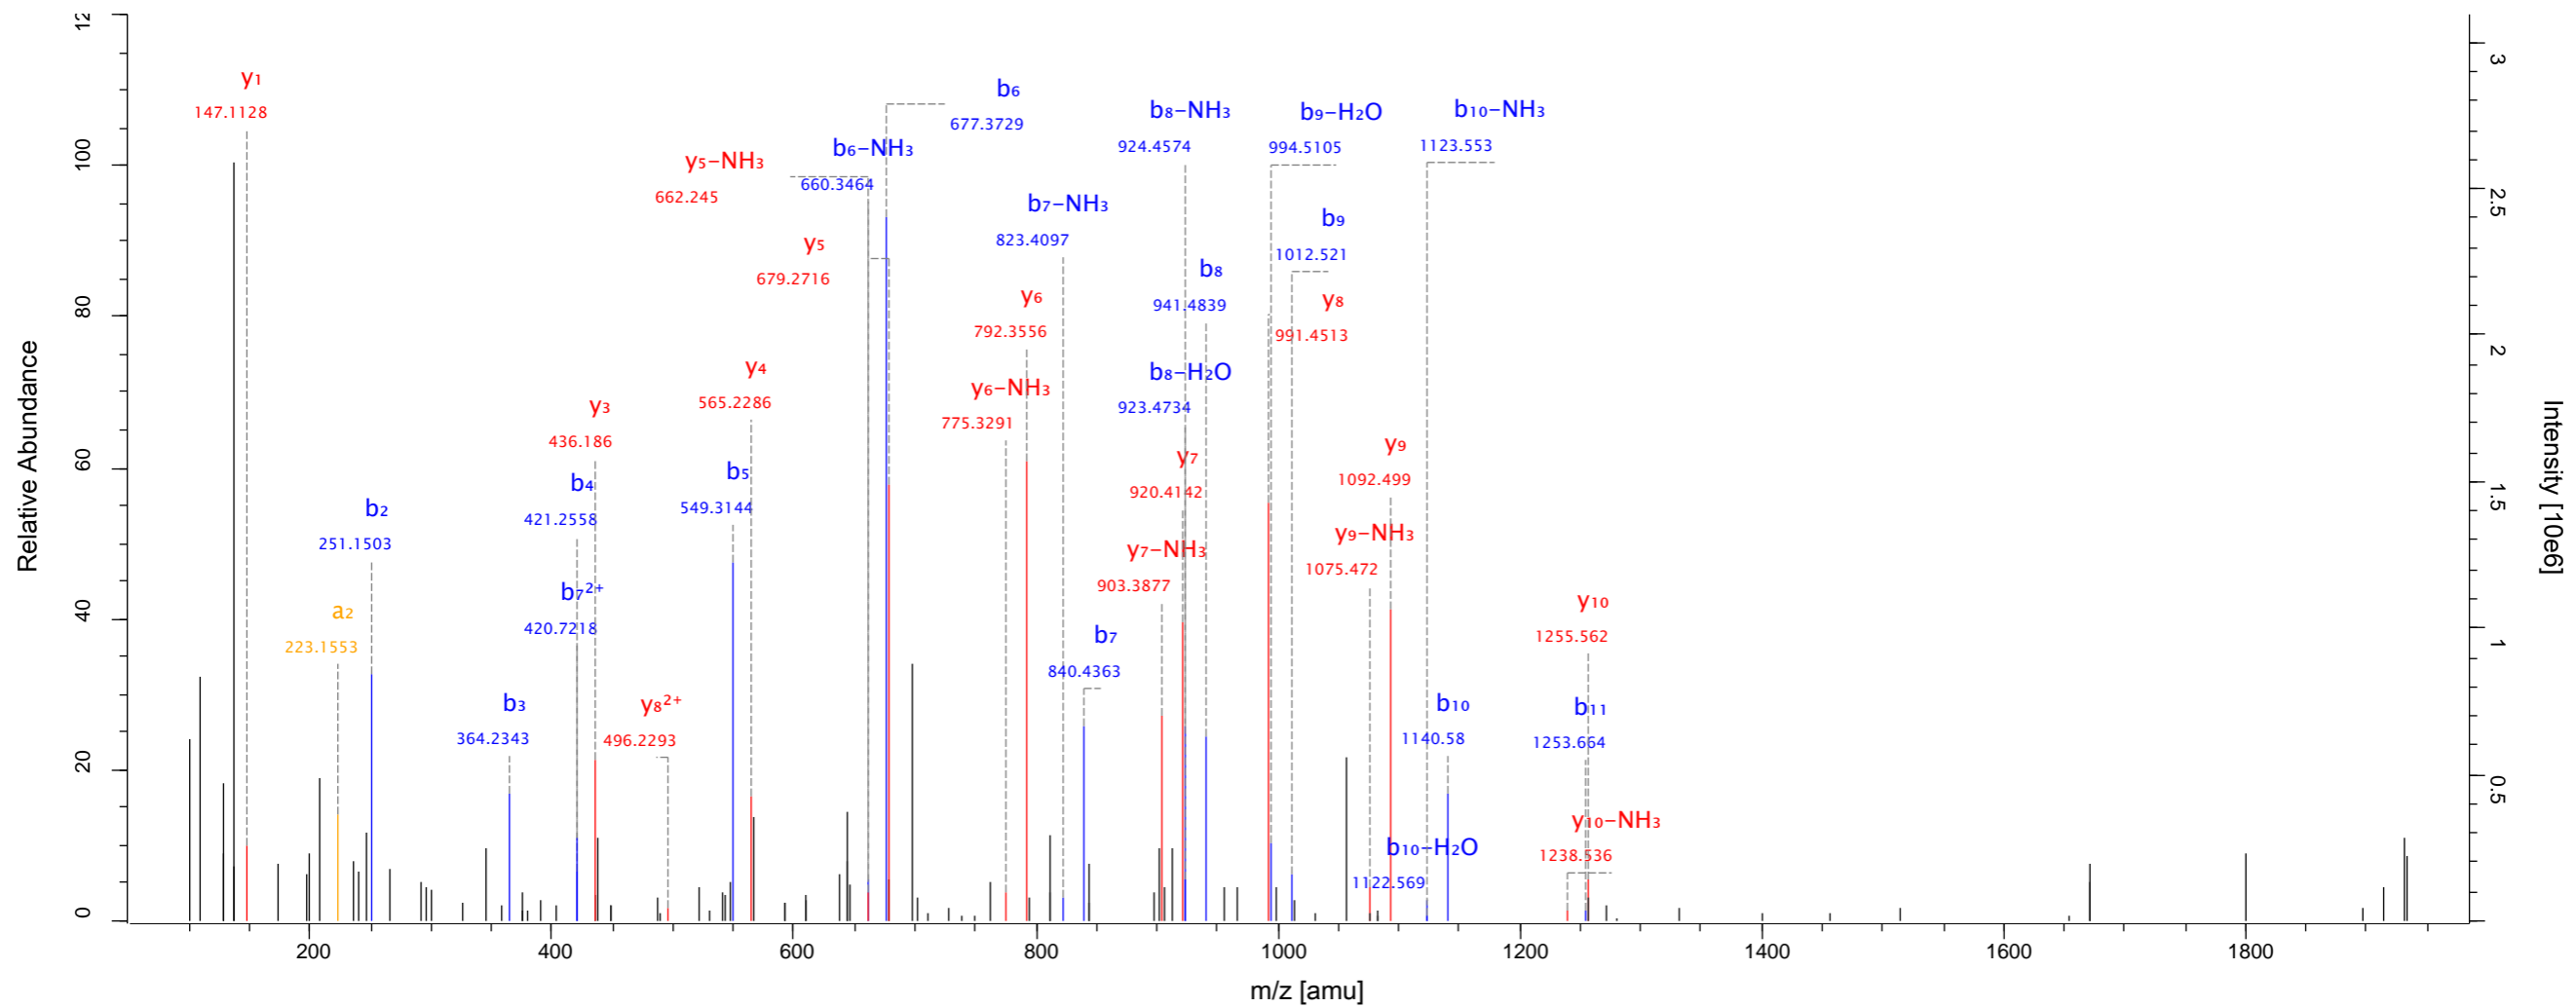

Raw file: 20111212\_EXQ5\_AnMi\_QC\_HCMVp1\_3  
Scan number: 25112  
Protein: ORFL224C.iORF1 - NC\_006273.2[134354,134734]- <unknown description>  
Peptide score: 76.85  
Method: FTMS; HCD

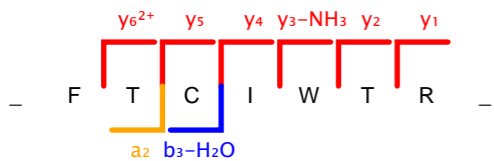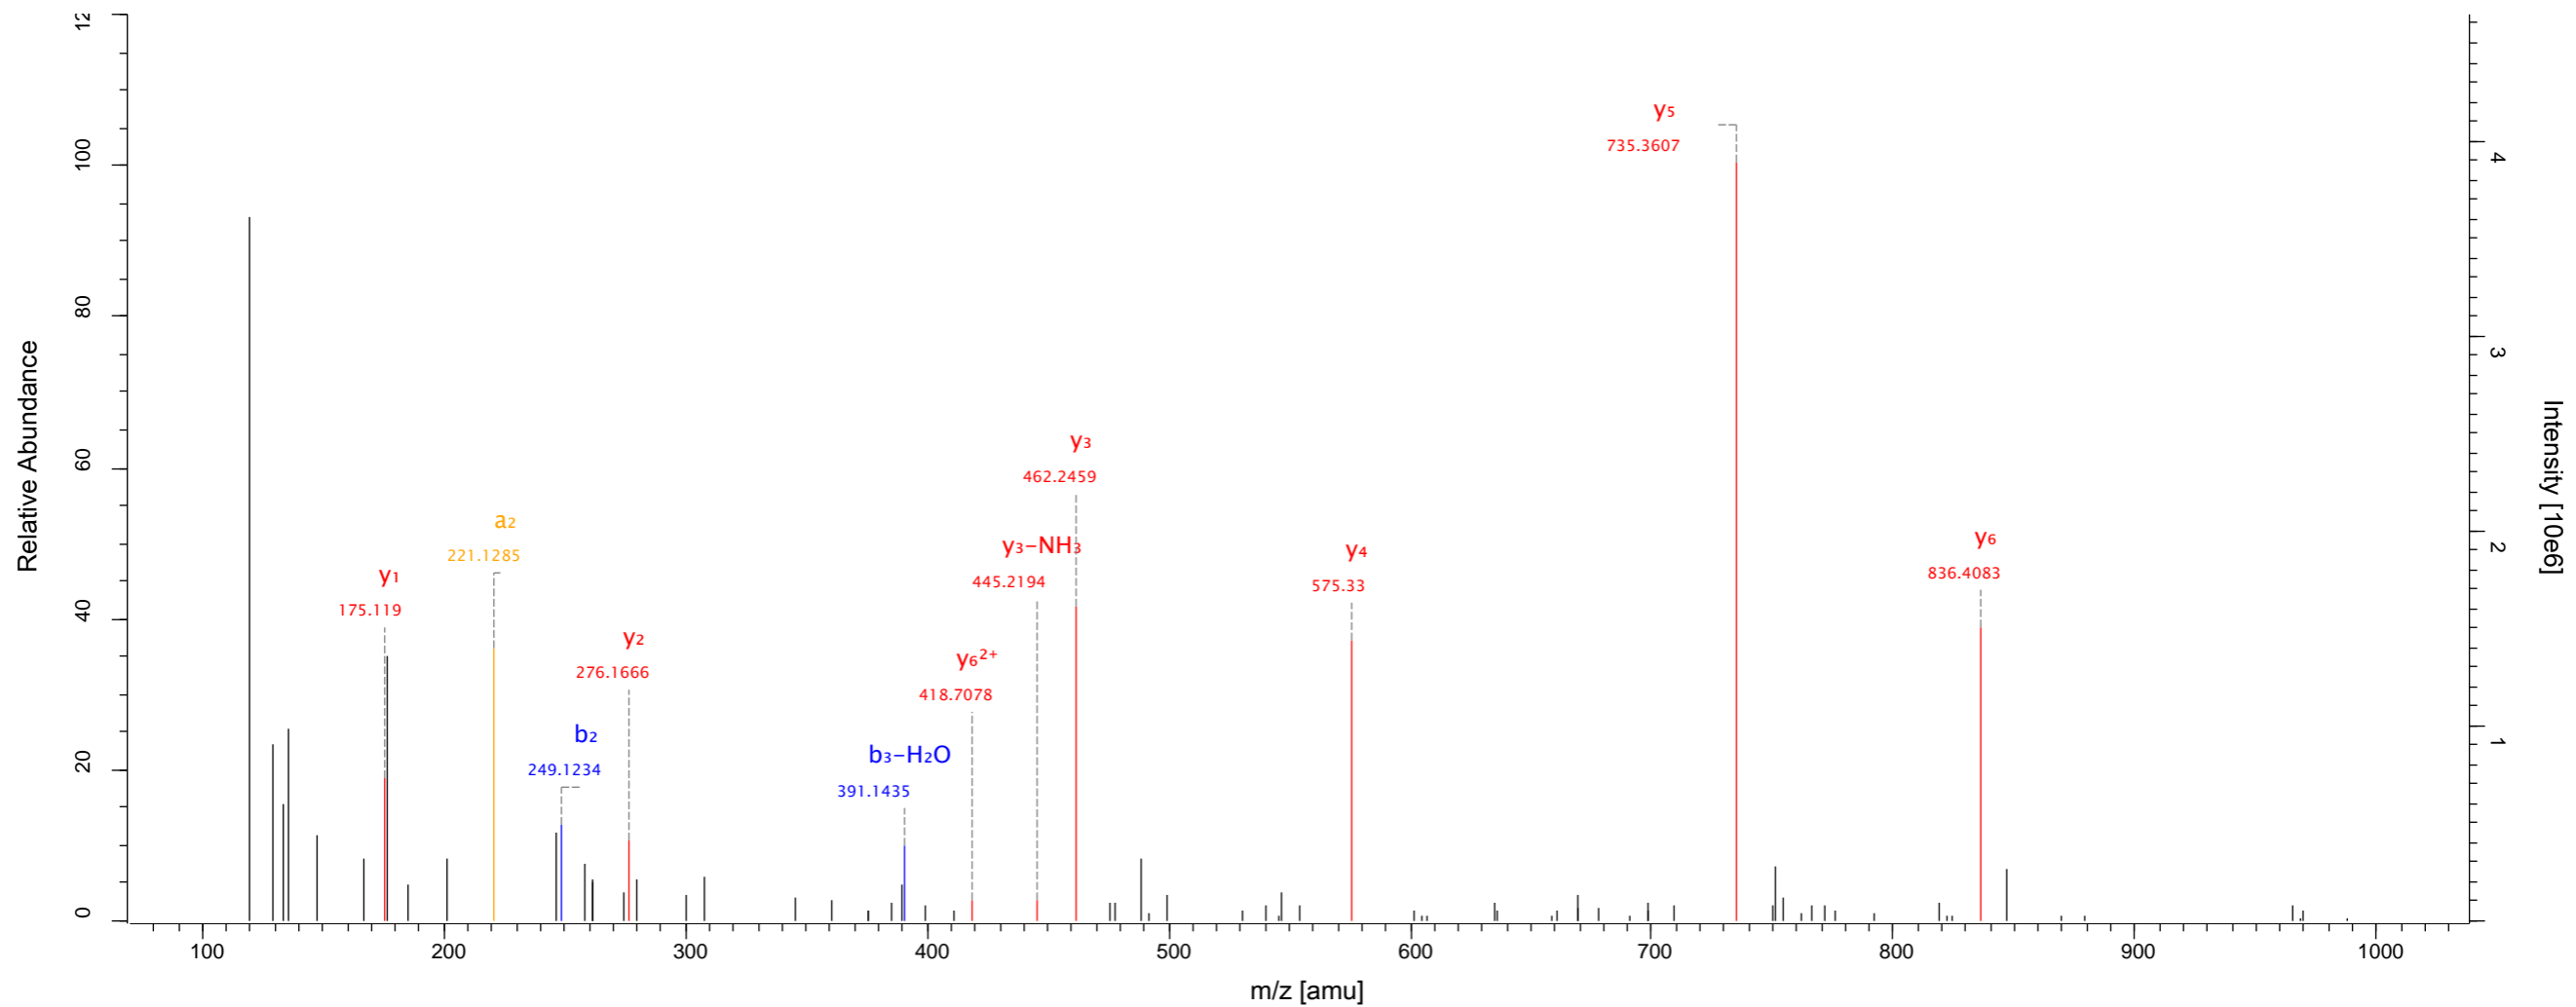

Raw file: 20111212\_EXQ5\_AnMi\_QC\_HCMVp11\_3  
 Scan number: 29132  
 Protein: ORFL224C.iORF1 - NC\_006273.2[134354,134734]- <unknown description>  
 Peptide score: 109.83  
 Method: FTMS; HCD

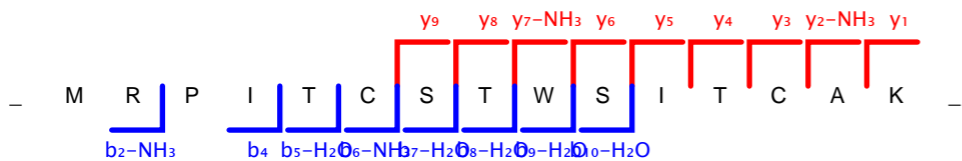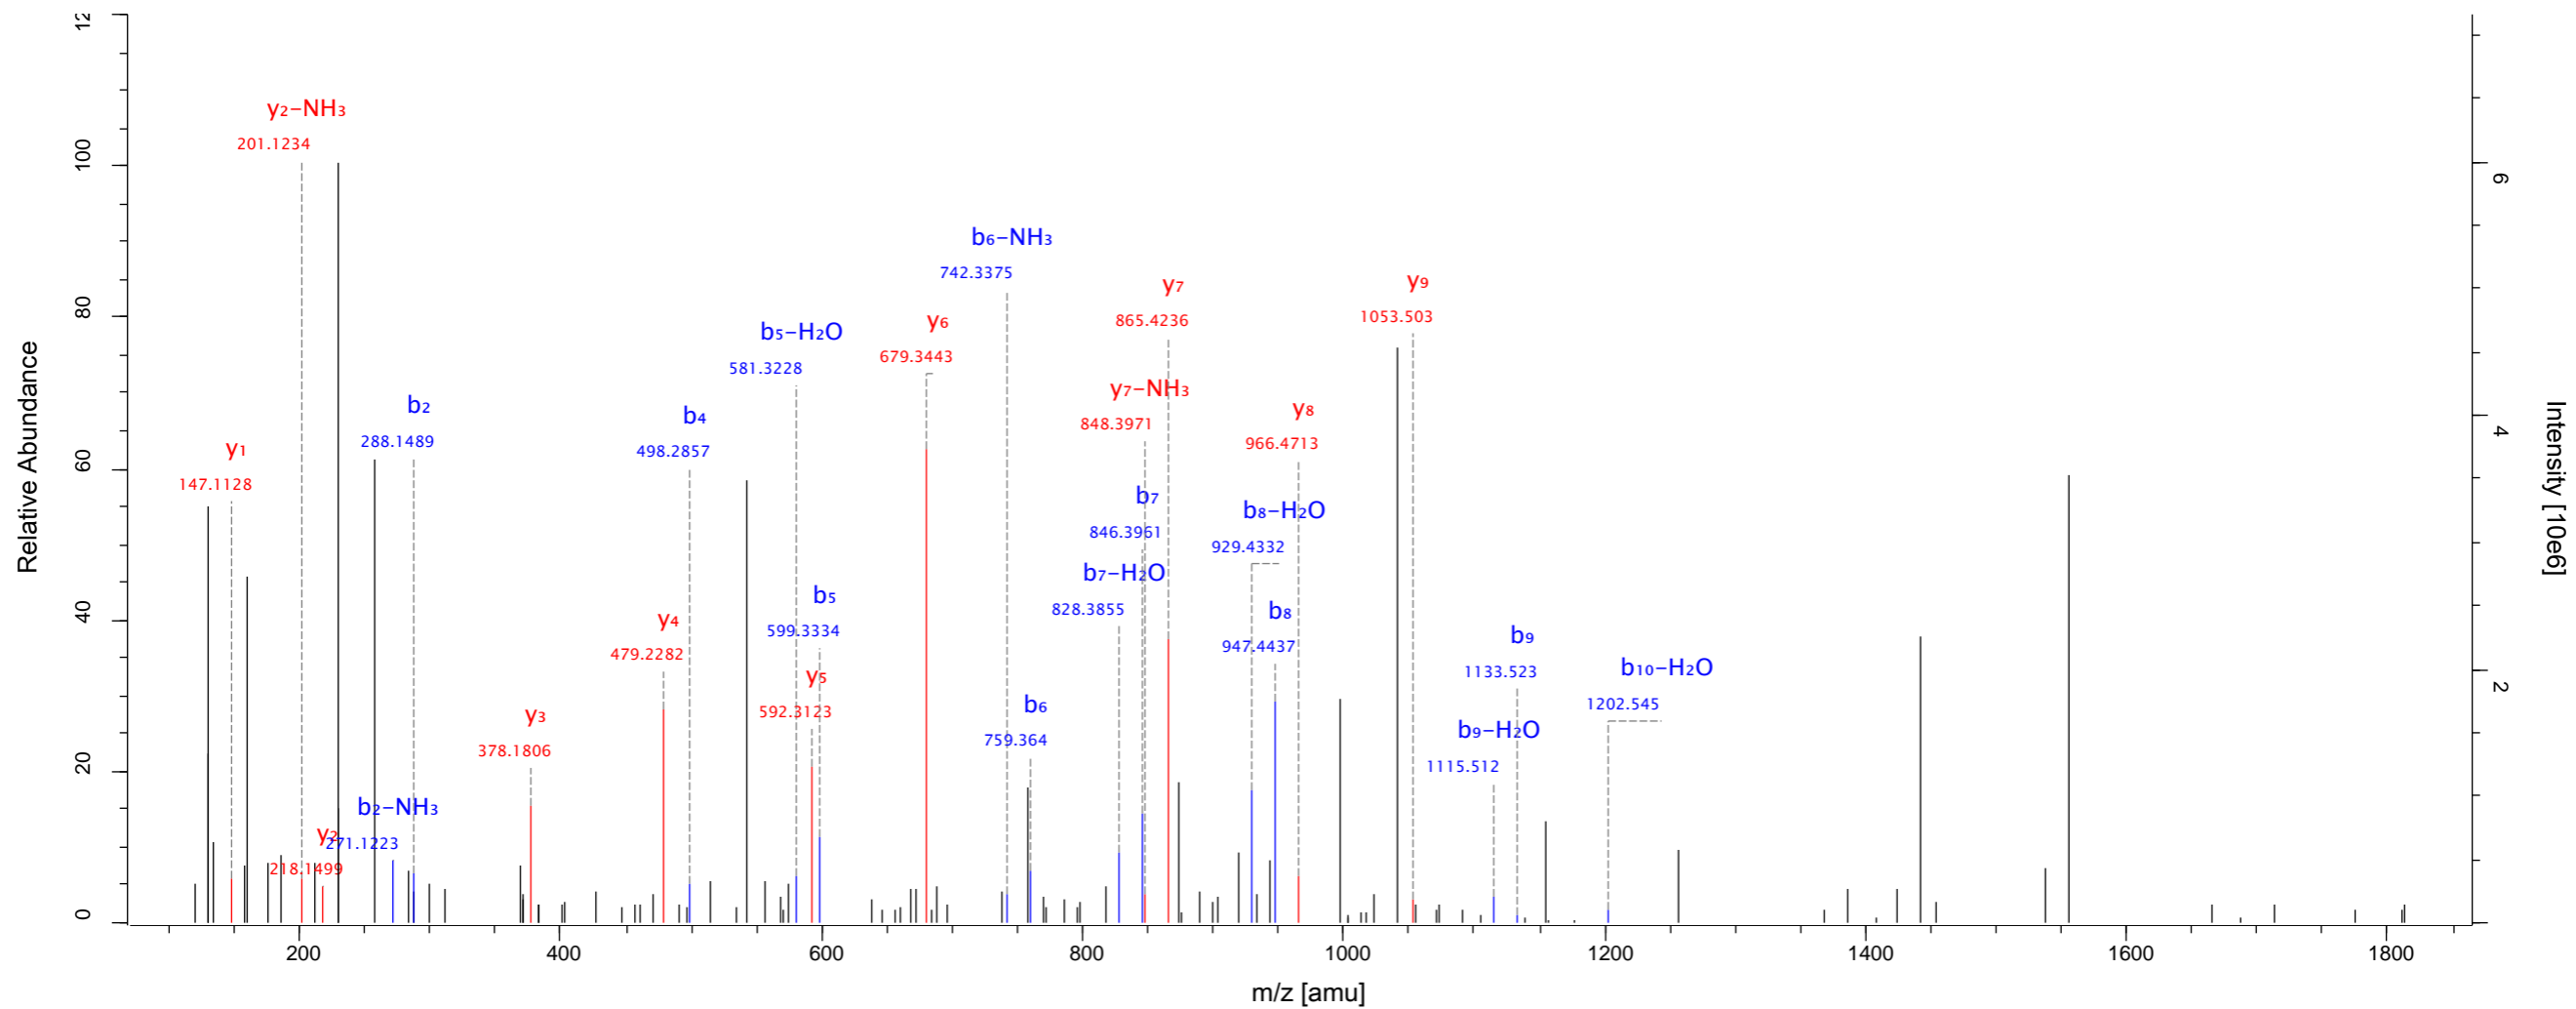



Raw file: 20111212\_EXQ5\_AnMi\_QC\_HCMVp1\_3  
Scan number: 29169  
Protein: ORFS365W + NC\_006273.2[225950,226606]+ <unknown description>  
Peptide score: 62.58  
Method: FTMS; HCD

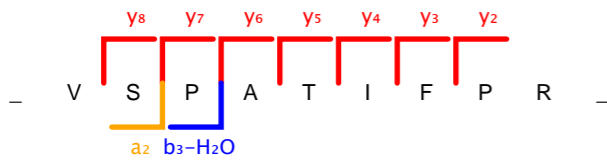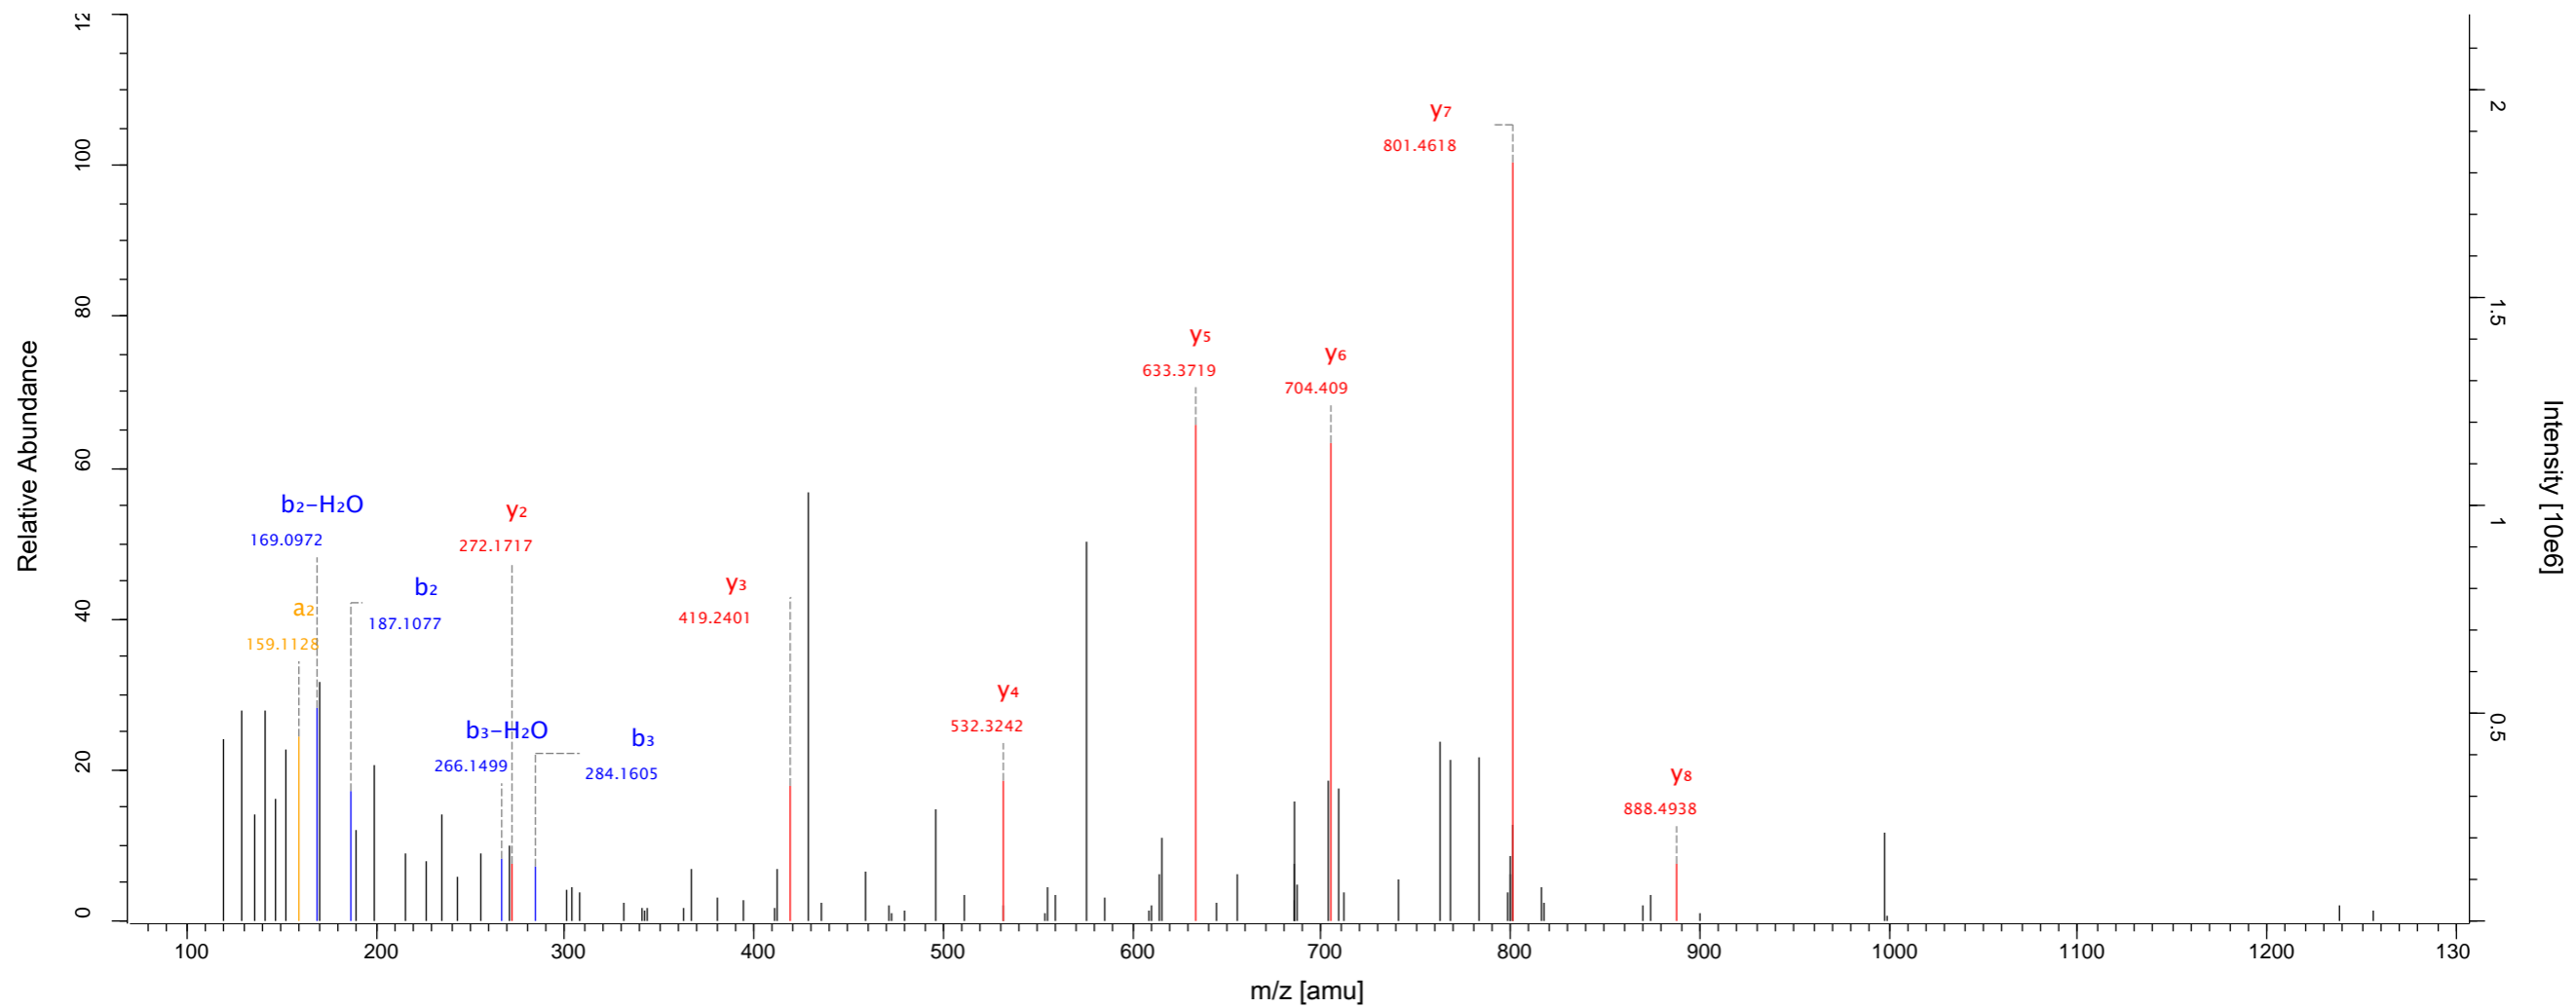

Raw file: 20111212\_EXQ5\_AnMi\_QC\_HCMVp1\_3  
Scan number: 29871  
Protein: ORFL321W + NC\_006273.2[191968,194126]+ <unknown description>; ORFL321W.iORF1 + NC\_006273.2[191968,194126]+ <unknown description>  
Peptide score: 44.81  
Method: FTMS; HCD

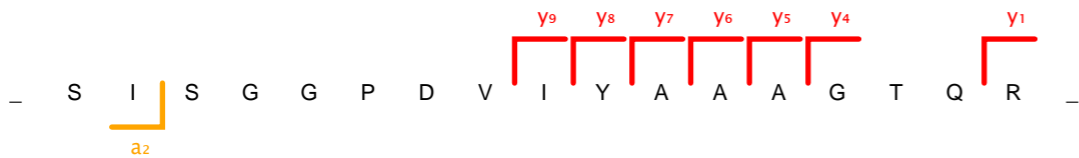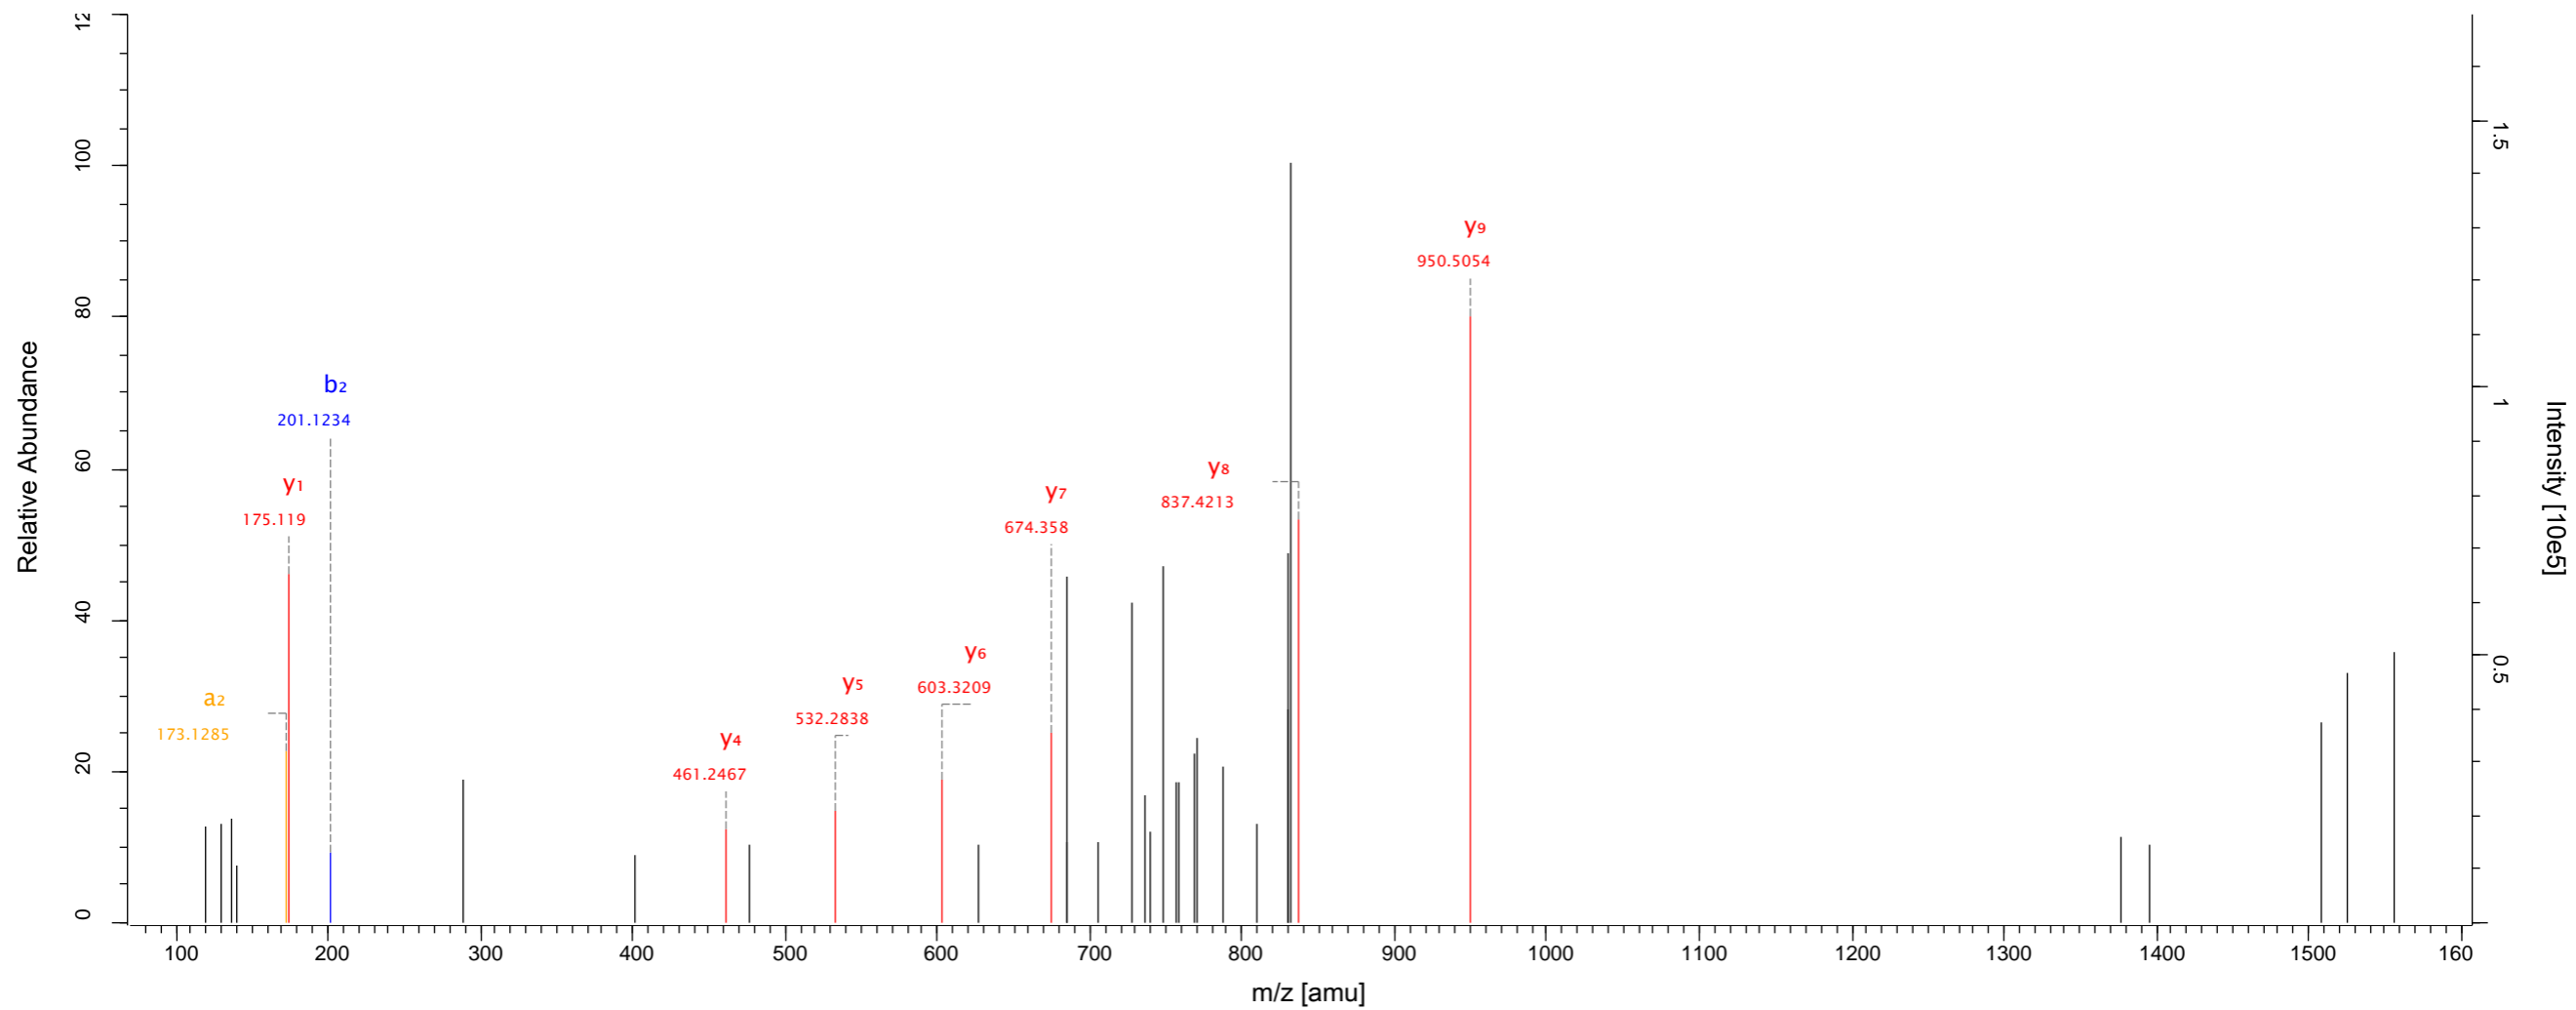

Raw file: 20111212\_EXQ5\_AnMi\_QC\_HCMVp1\_3  
Scan number: 33826  
Protein: ORFL190C - NC\_006273.2[111965,112384]- <unknown description>  
Peptide score: 114.83  
Method: FTMS; HCD

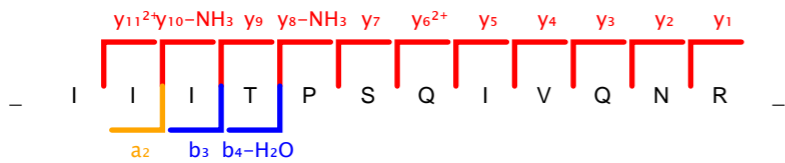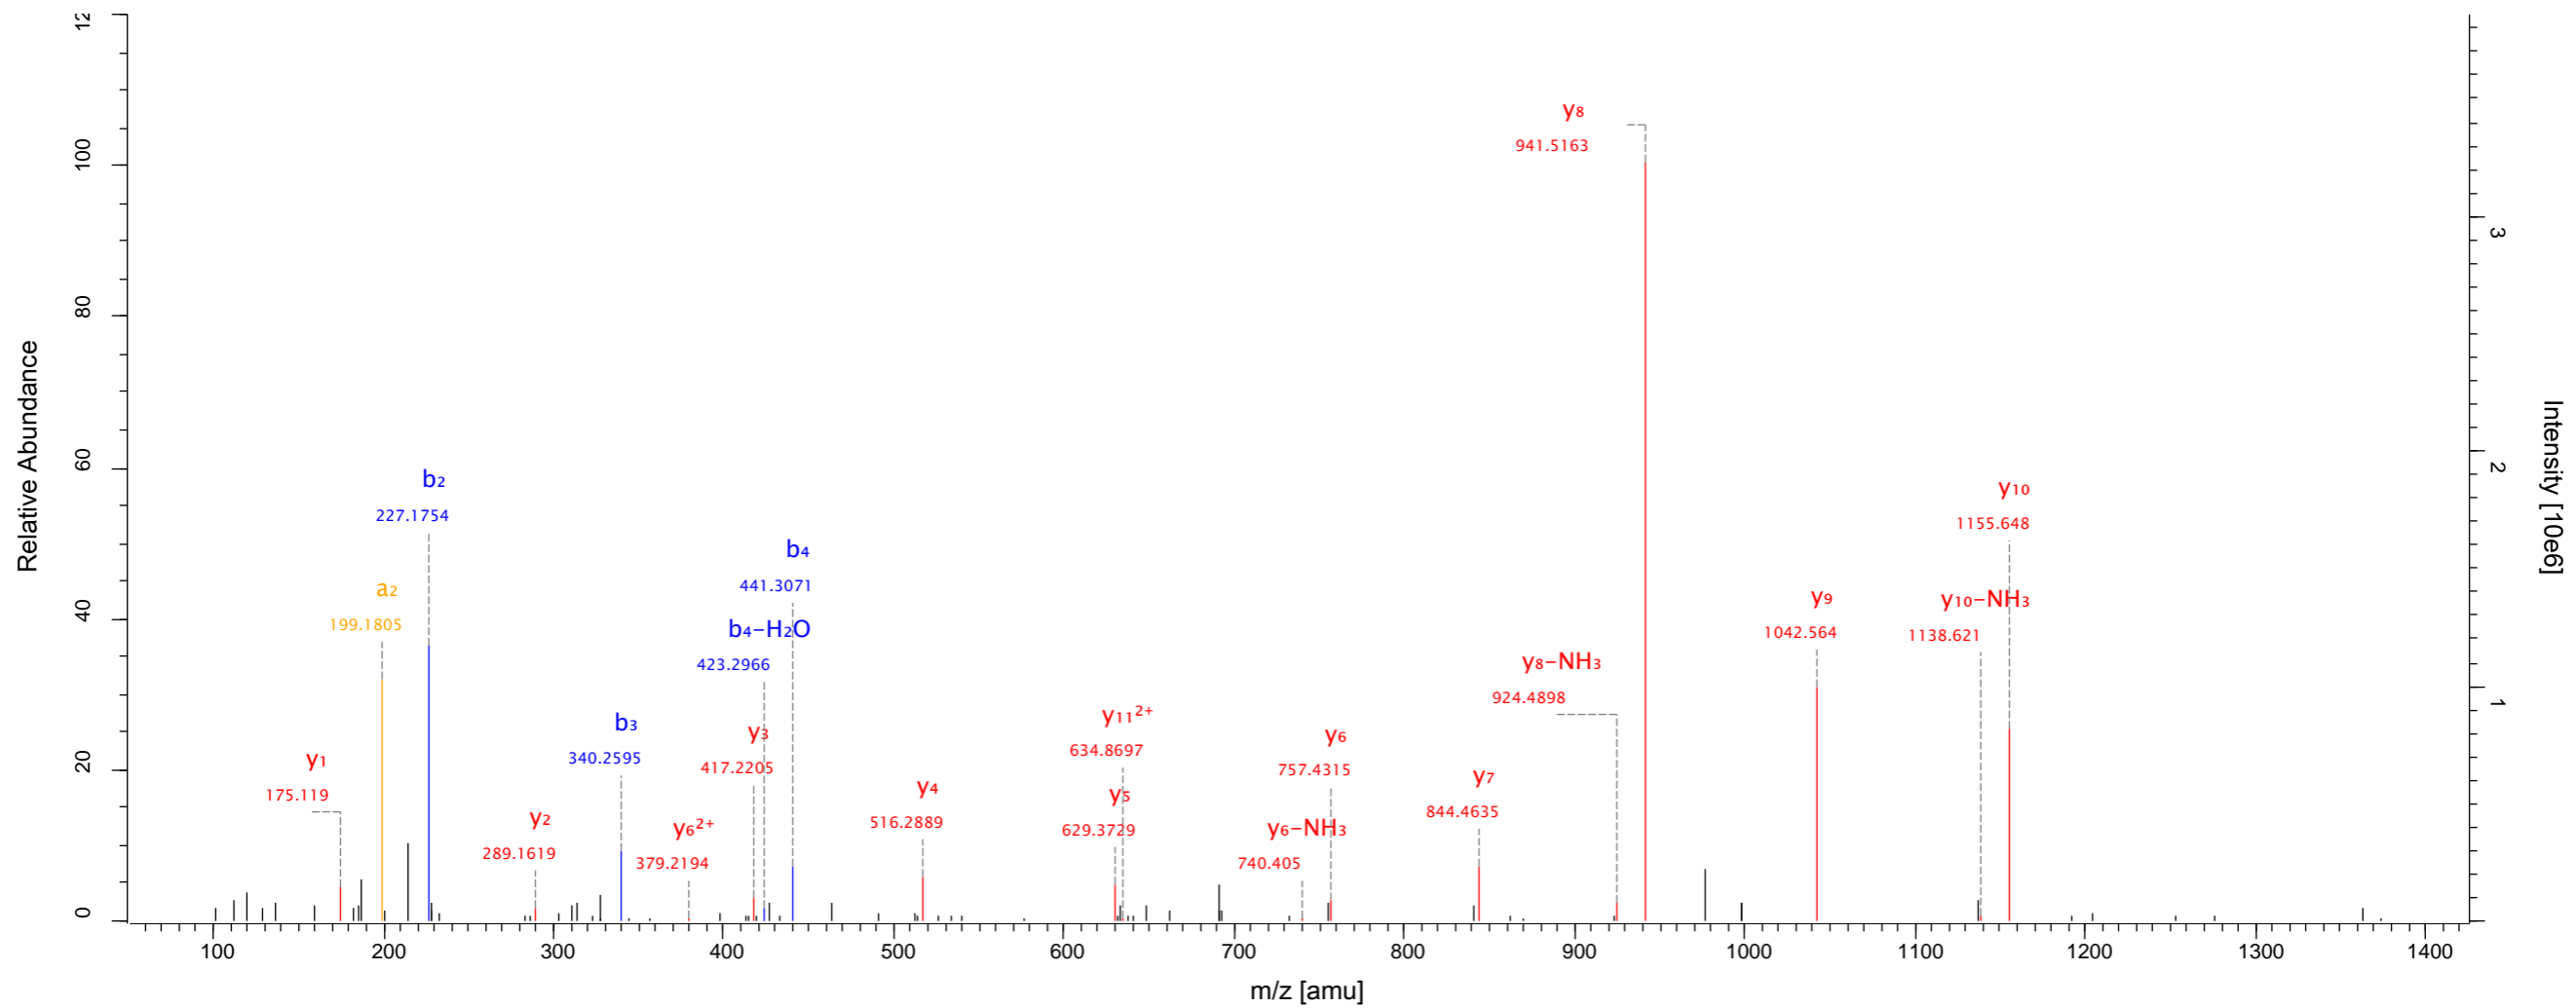

Raw file: 20111212\_EXQ5\_AnMi\_QC\_HCMVp1\_3  
Scan number: 36993  
Protein: ORFL86W + NC\_006273.2[38059,38538]+ <unknown description>  
Peptide score: 97.91  
Method: FTMS; HCD

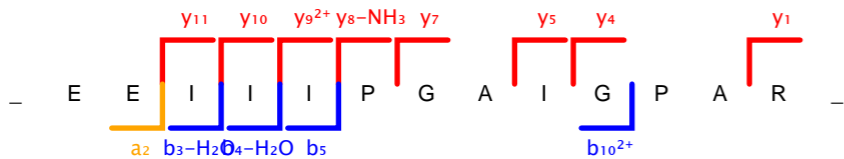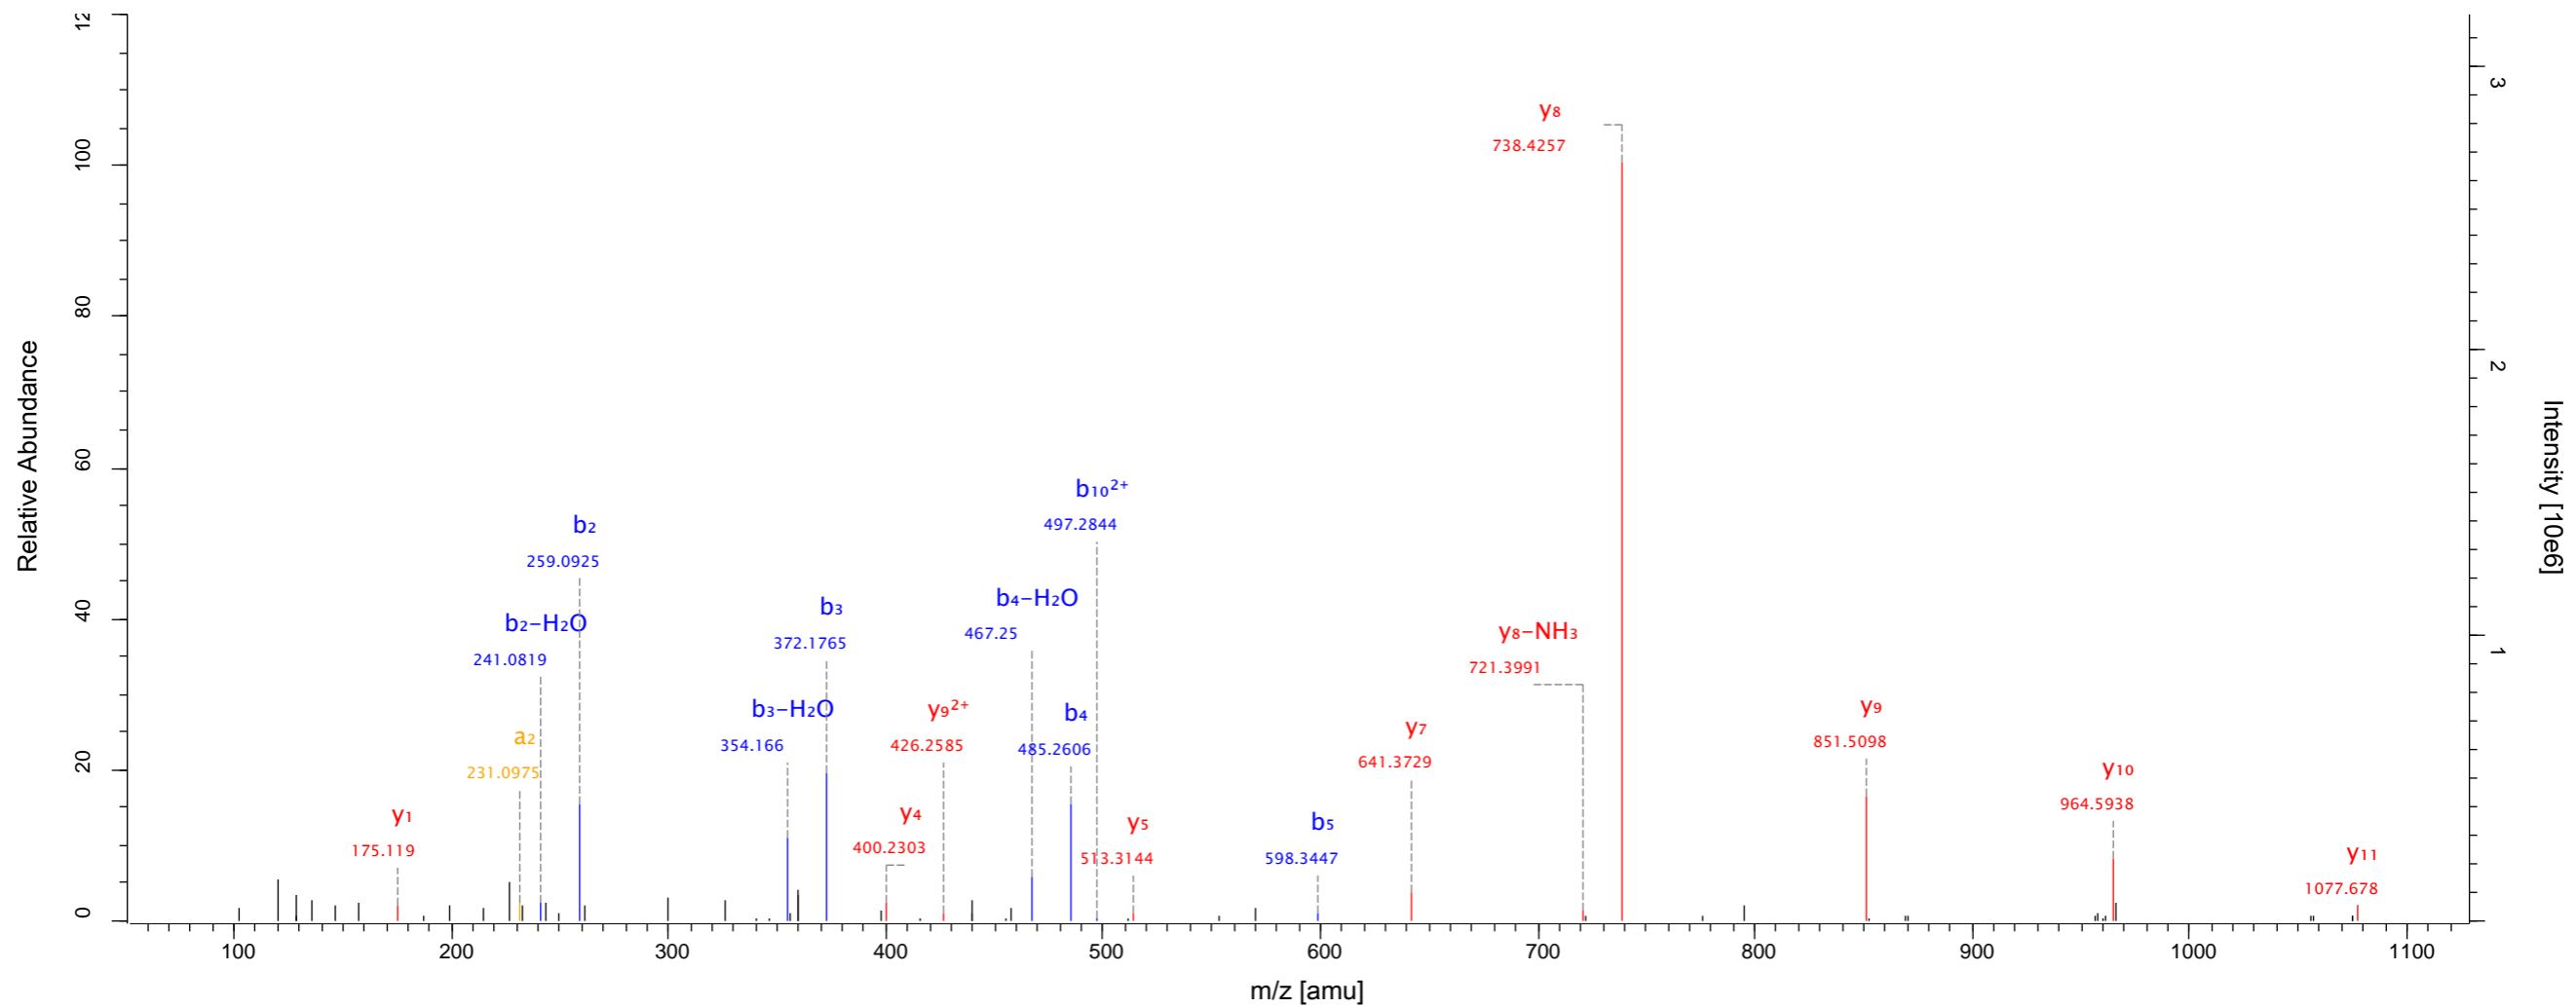

Raw file: 20111212\_EXQ5\_AnMi\_QC\_HCMVp1\_3  
Scan number: 44705  
Protein: ORFL149C.iORF2 - NC\_006273.2[91004,91471]- <unknown description>  
Peptide score: 65.35  
Method: FTMS; HCD

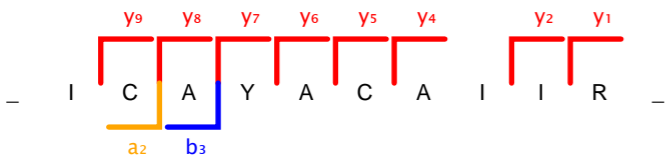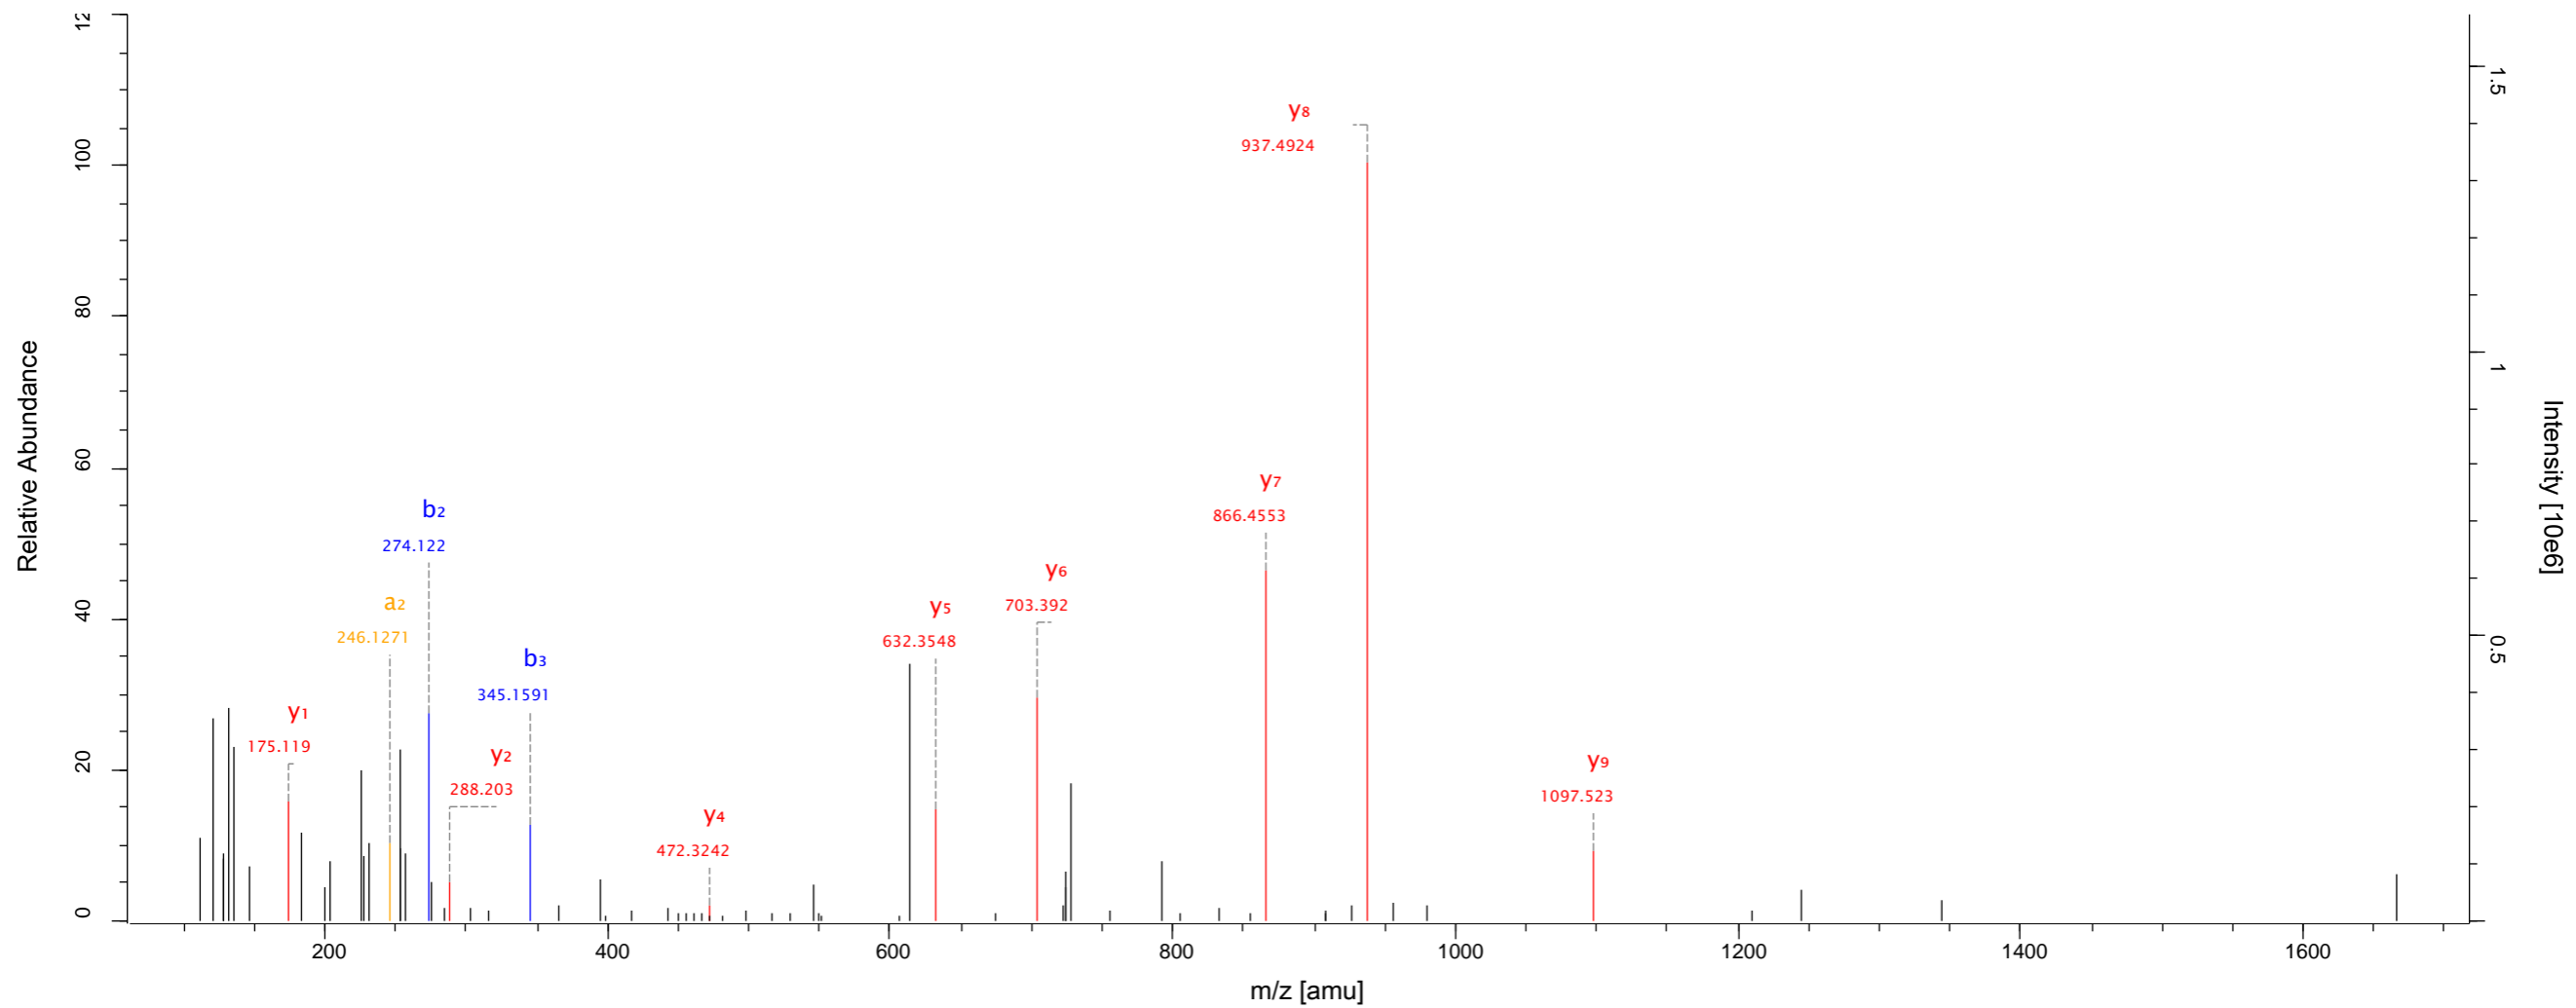

Raw file: 20111212\_EXQ5\_AnMi\_QC\_HCMVp1\_3  
 Scan number: 6988  
 Protein: ORFL86W + NC\_006273.2[38059,38538]+ <unknown description>  
 Peptide score: 98.58  
 Method: FTMS; HCD

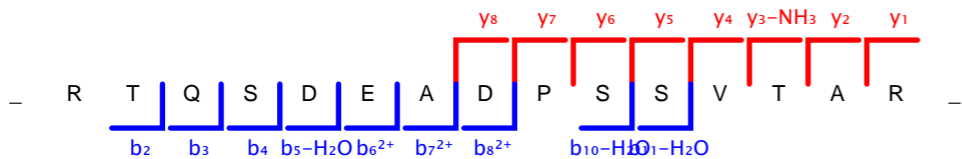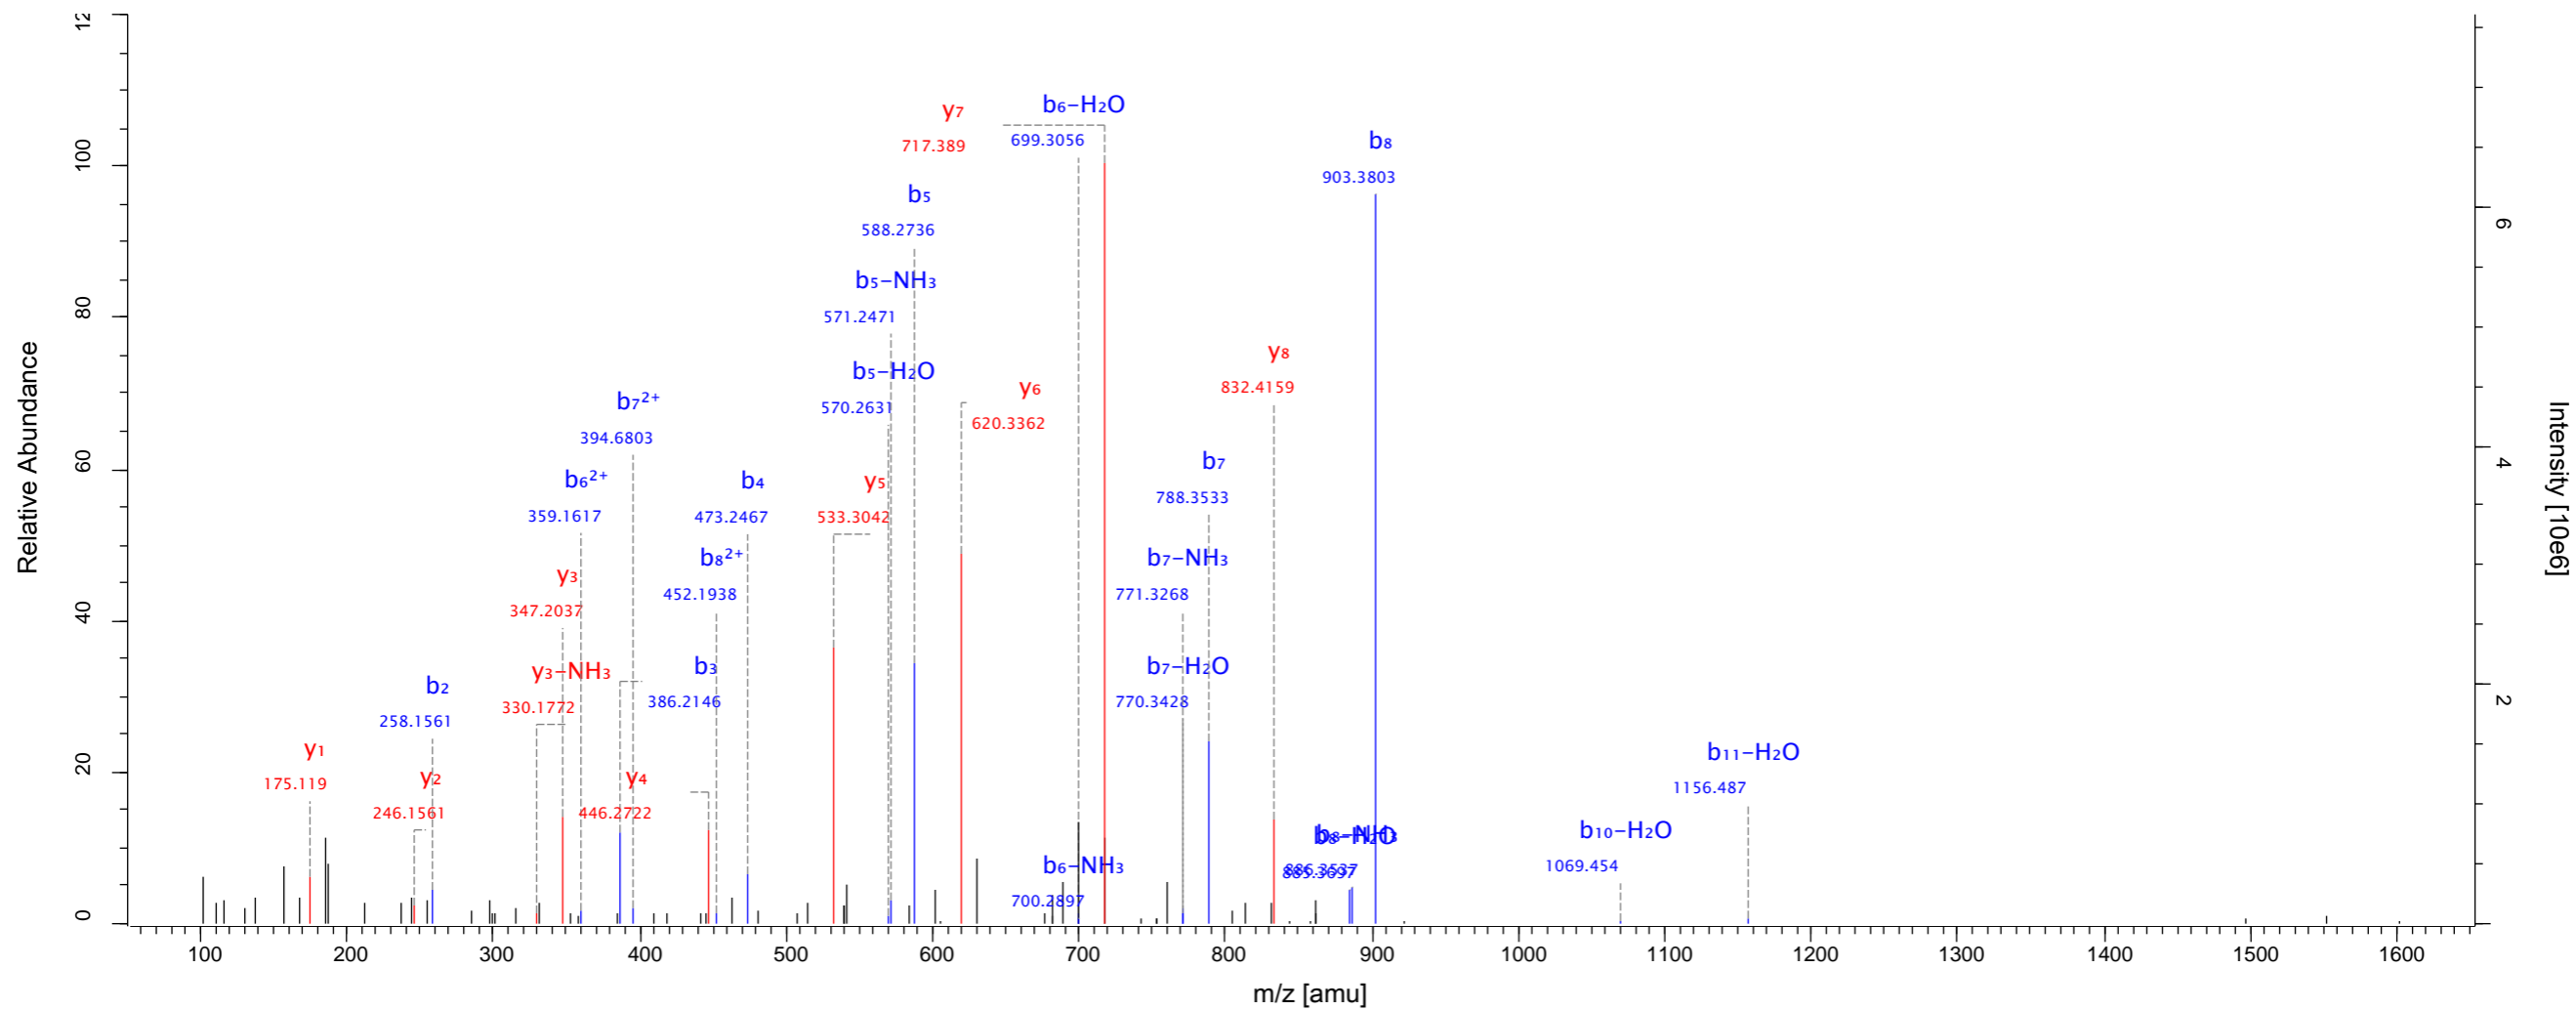

Raw file: 20111212\_EXQ5\_AnMi\_QC\_HCMVp11\_3  
Scan number: 8334  
Protein: ORFL86W + NC\_006273.2[38059,38538]+ <unknown description>  
Peptide score: 95.65  
Method: FTMS; HCD

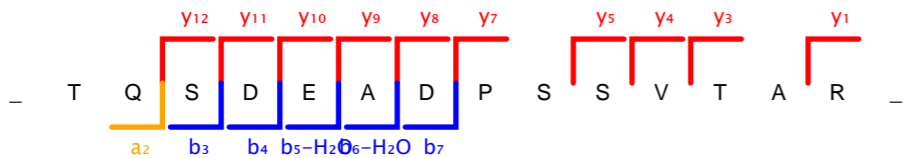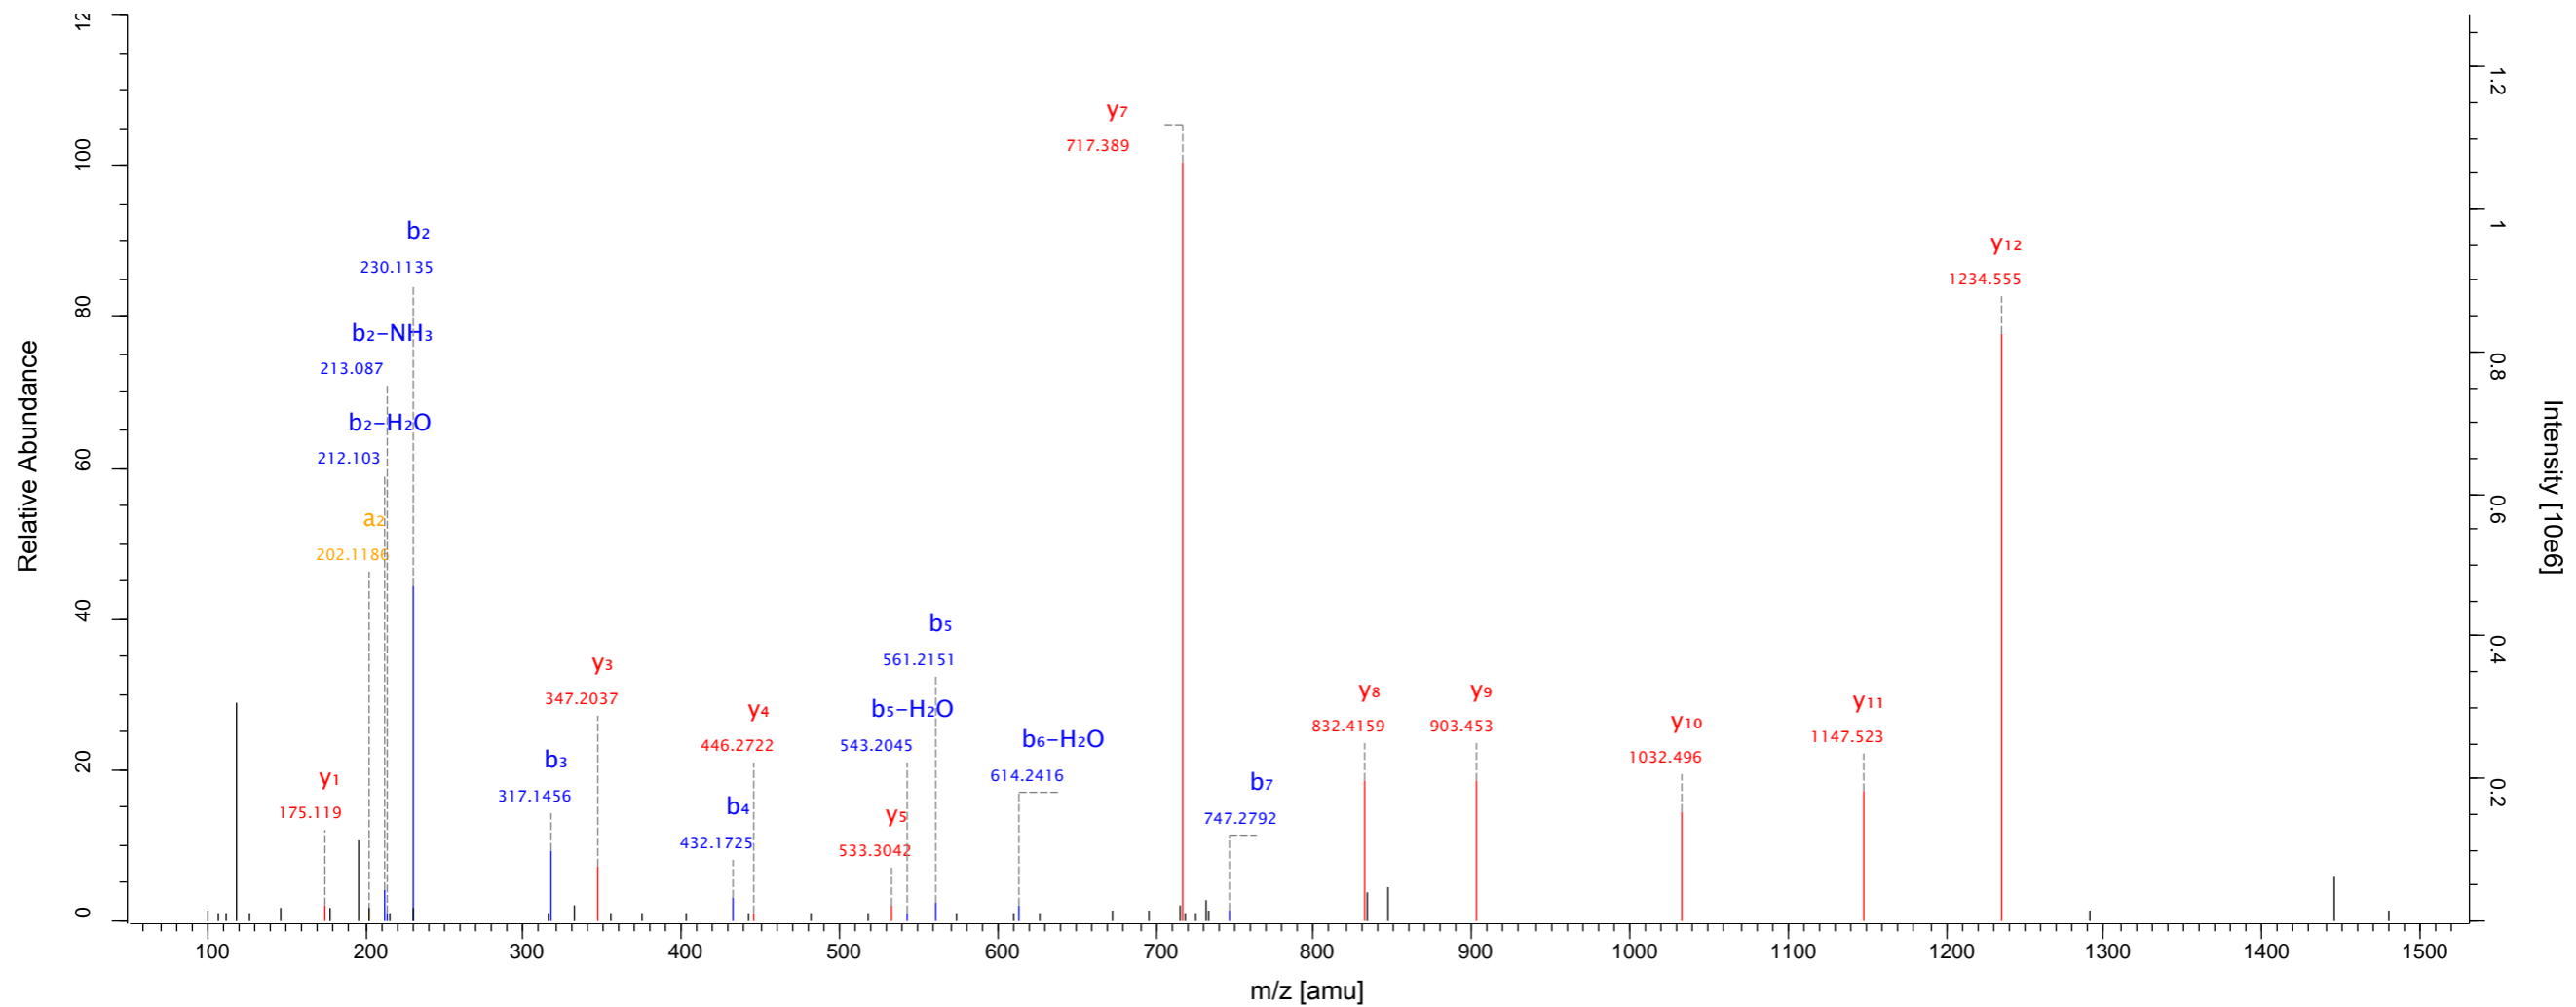

Raw file: 20111212\_EXQ5\_AnMi\_QC\_HCMVp1\_4  
Scan number: 16357  
Protein: ORFS365W + NC\_006273.2[225950,226606]+ <unknown description>  
Peptide score: 145.72  
Method: FTMS; HCD

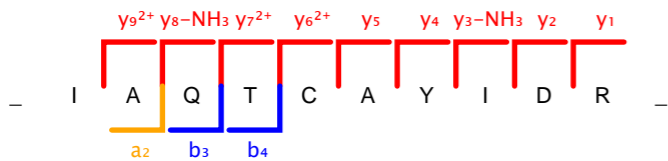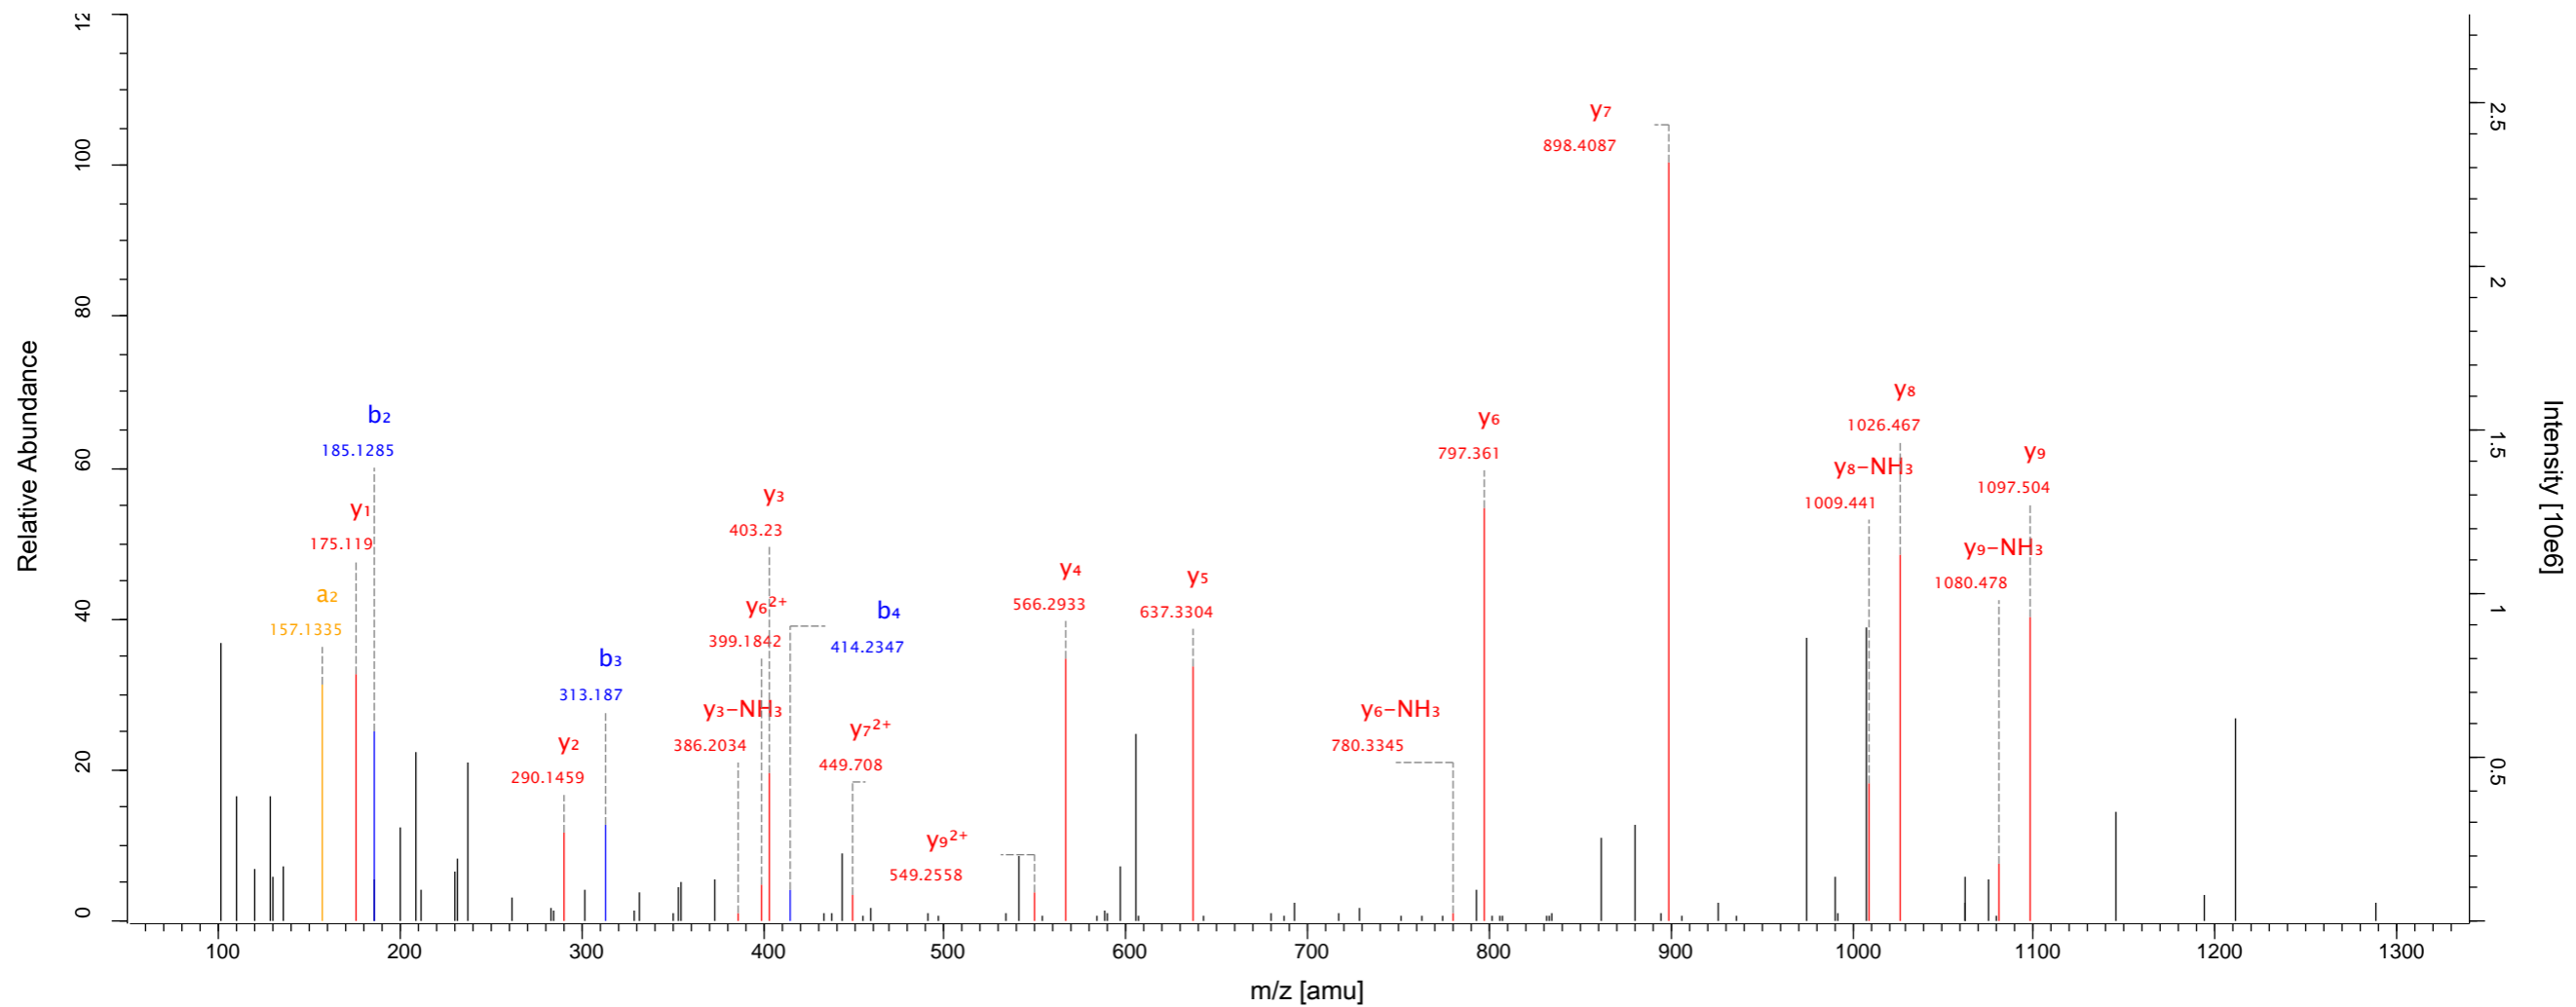



Raw file: 20111212\_EXQ5\_AnMi\_QC\_HCMVp11\_4  
Scan number: 17002  
Protein: ORFL82W + NC\_006273.2[36796,37488]+ <unknown description>  
Peptide score: 97.46  
Method: FTMS; HCD

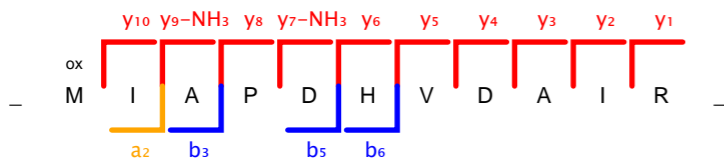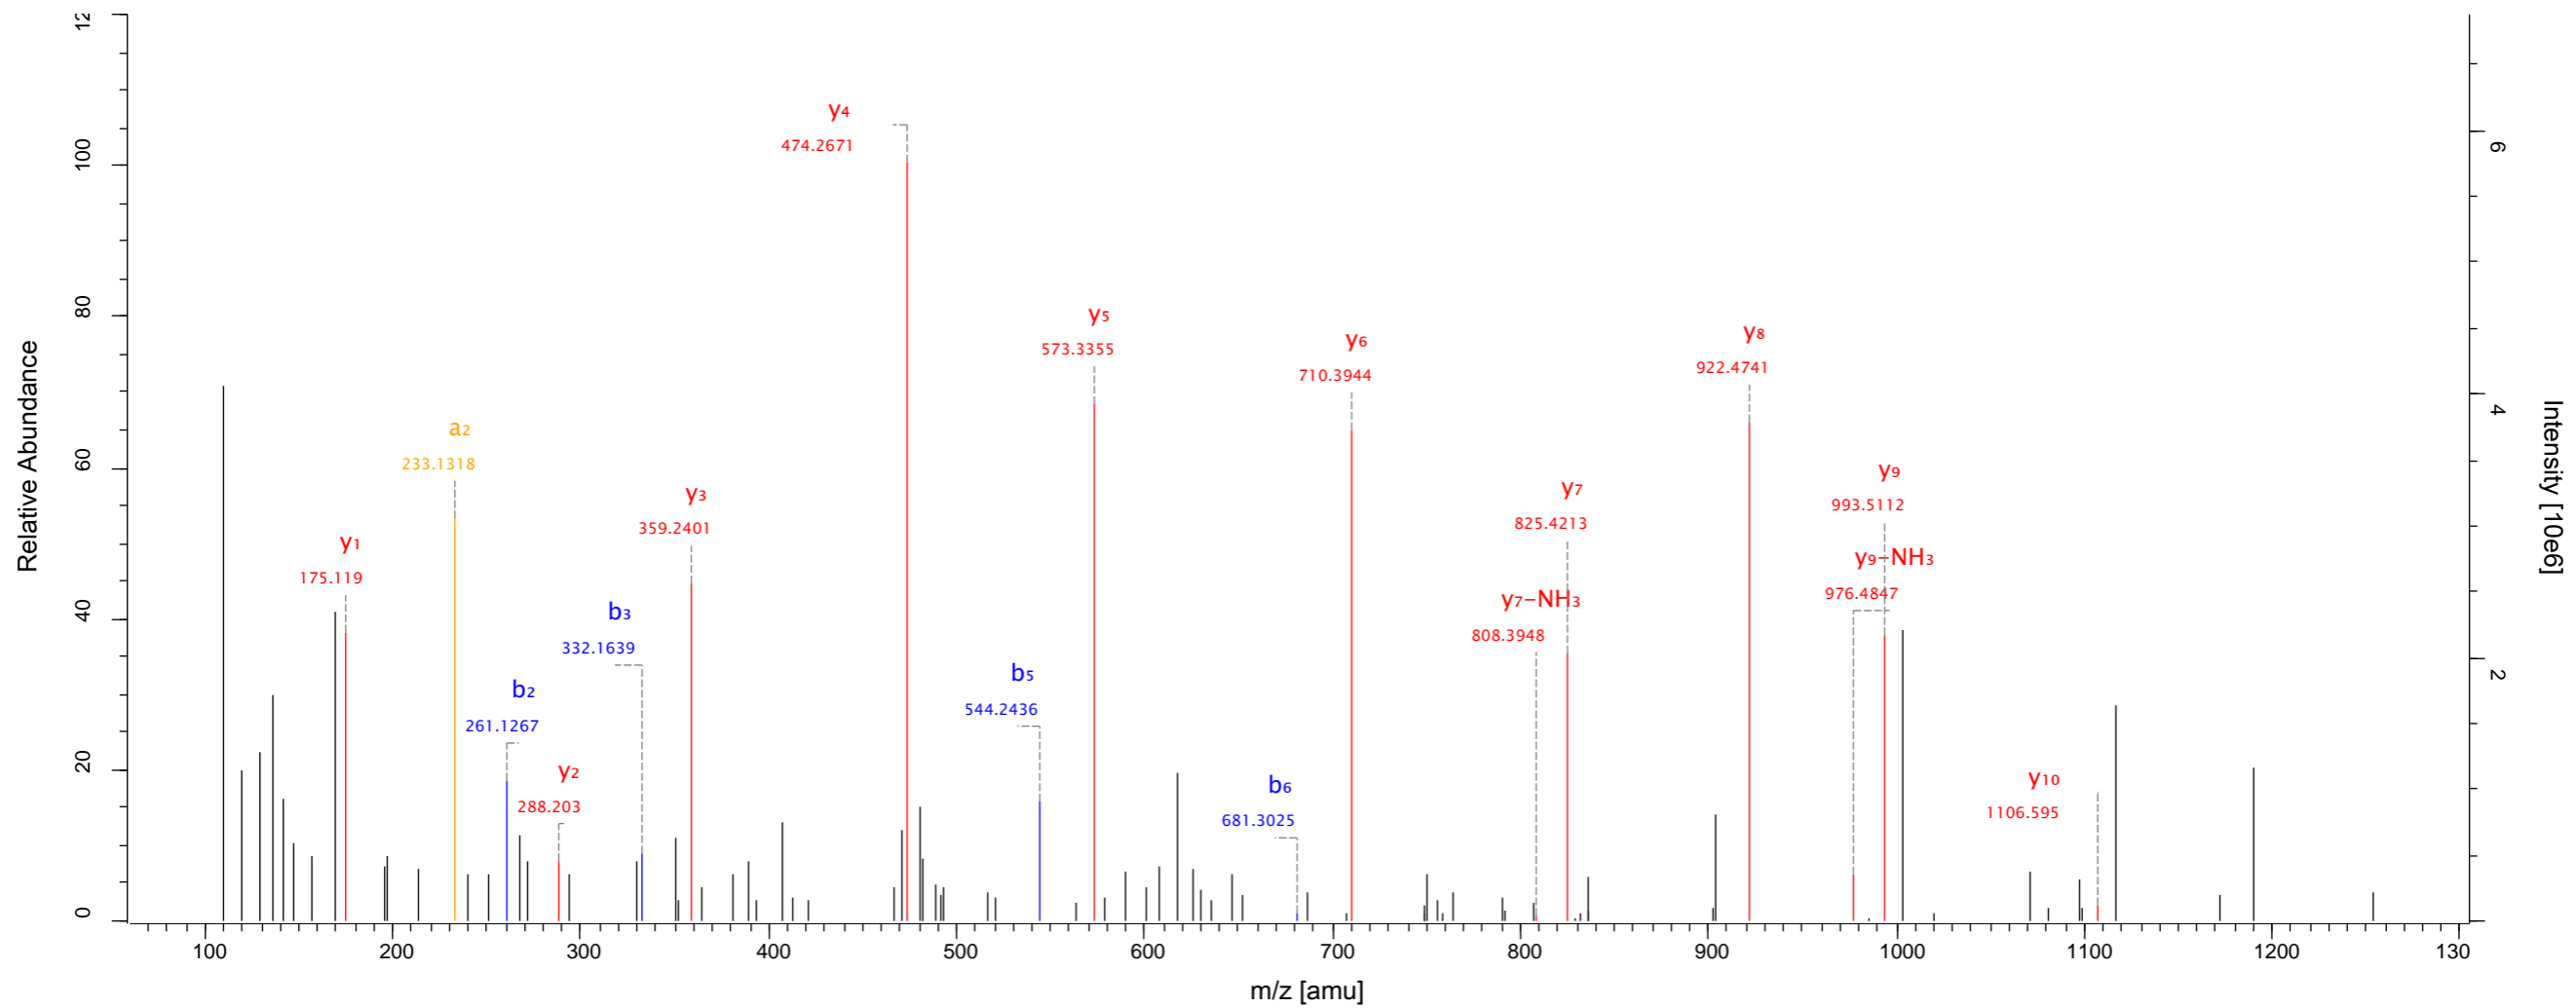

Raw file: 20111212\_EXQ5\_AnMi\_QC\_HCMVp1\_4  
 Scan number: 22333  
 Protein: ORFL299W + NC\_006273.2[185047,185685]+ <unknown description>  
 Peptide score: 145  
 Method: FTMS; HCD

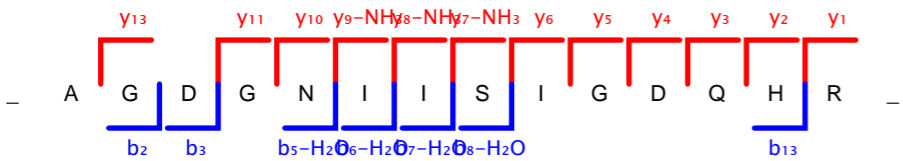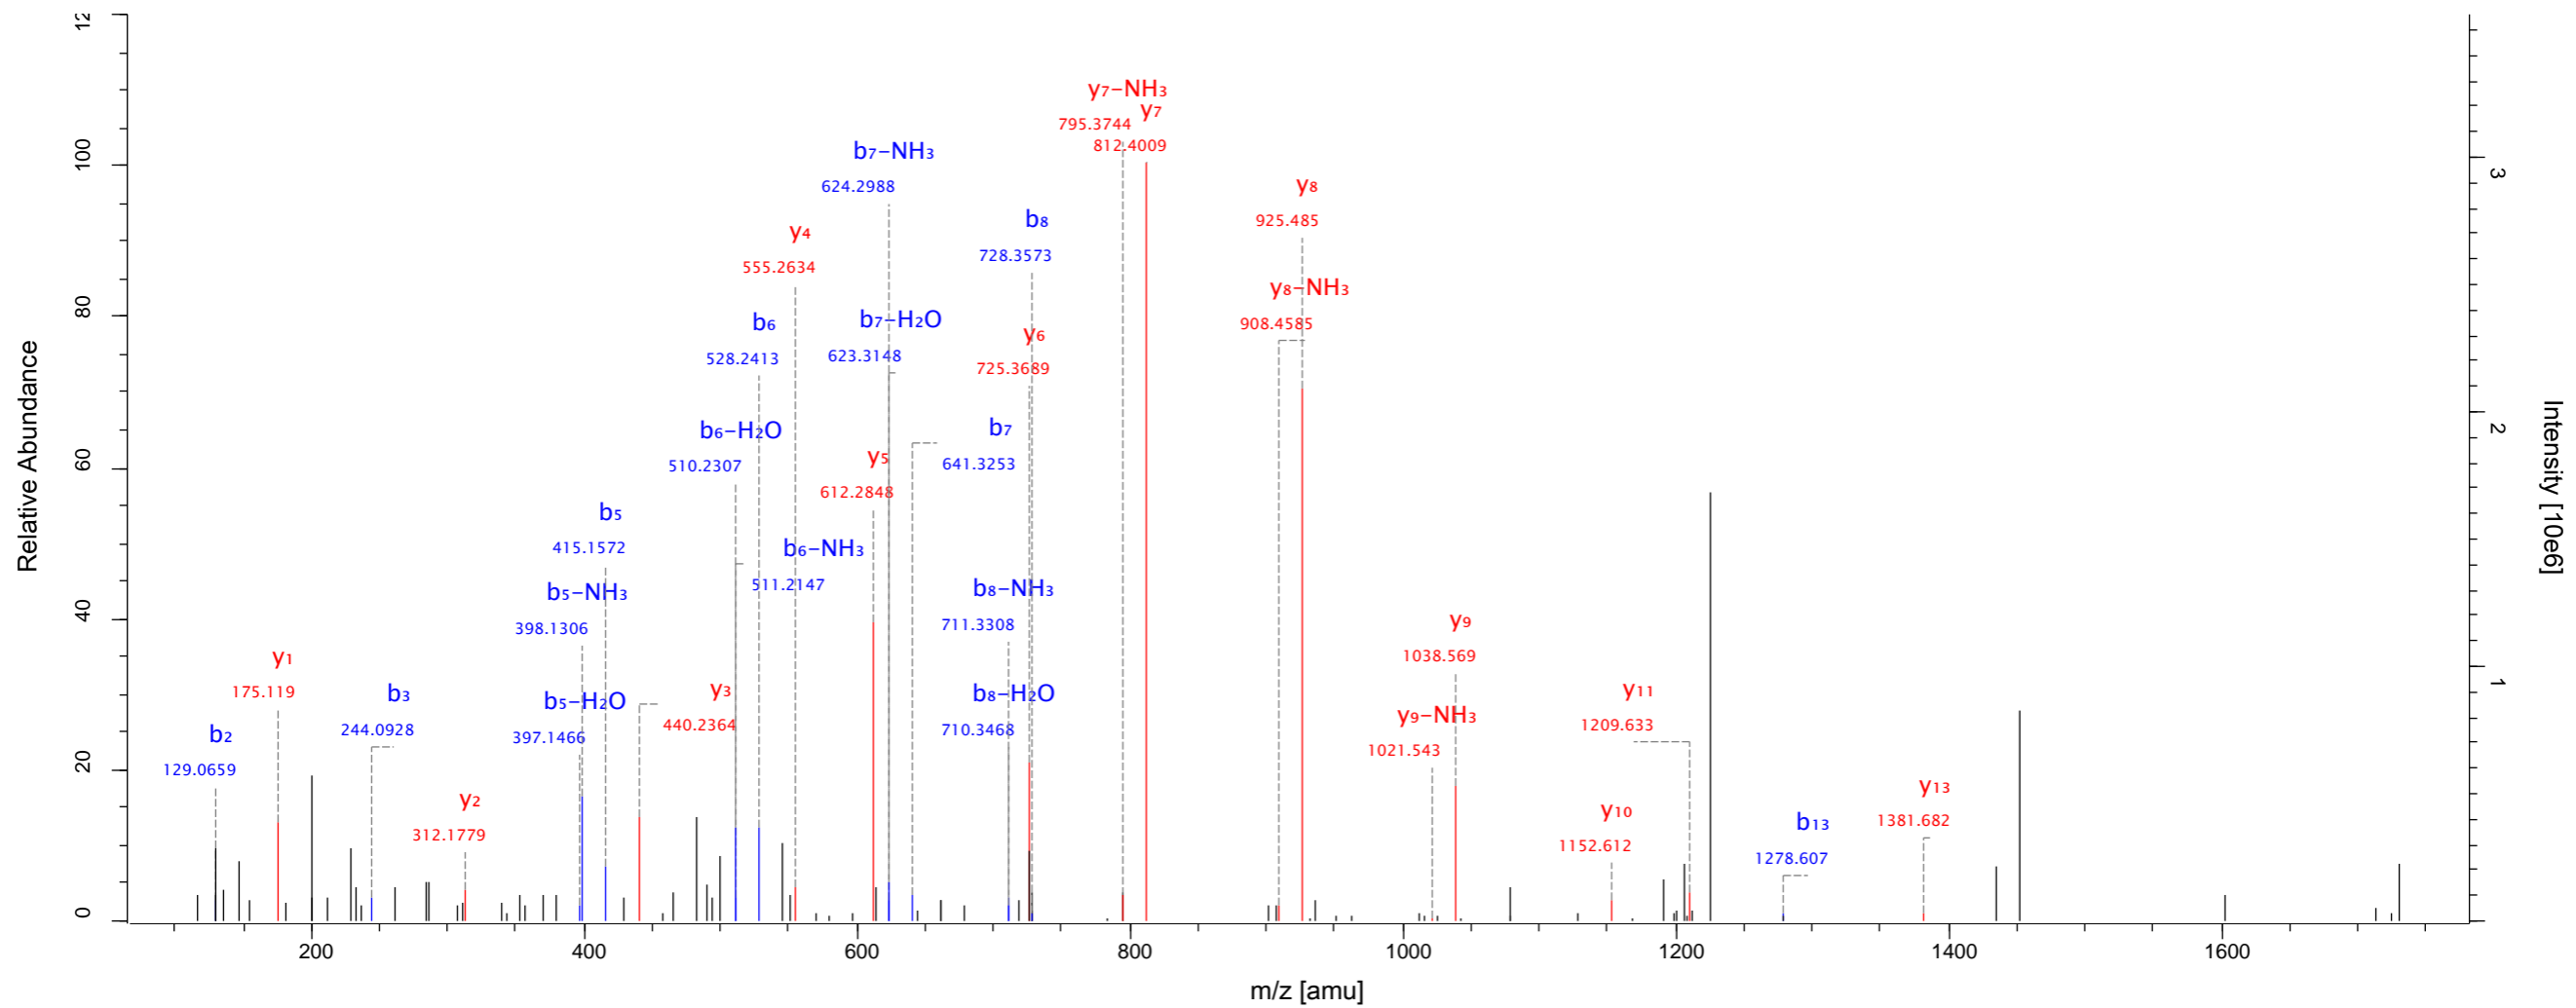

Raw file: 20111212\_EXQ5\_AnMi\_QC\_HCMVp1\_4  
Scan number: 29515  
Protein: ORFL299W + NC\_006273.2[185047,185685]+ <unknown description>  
Peptide score: 89.4  
Method: FTMS; HCD

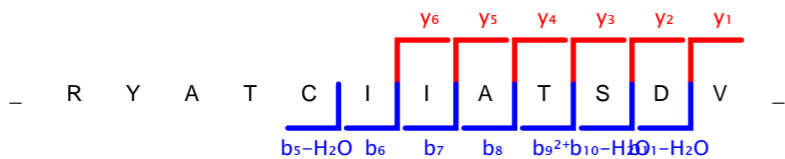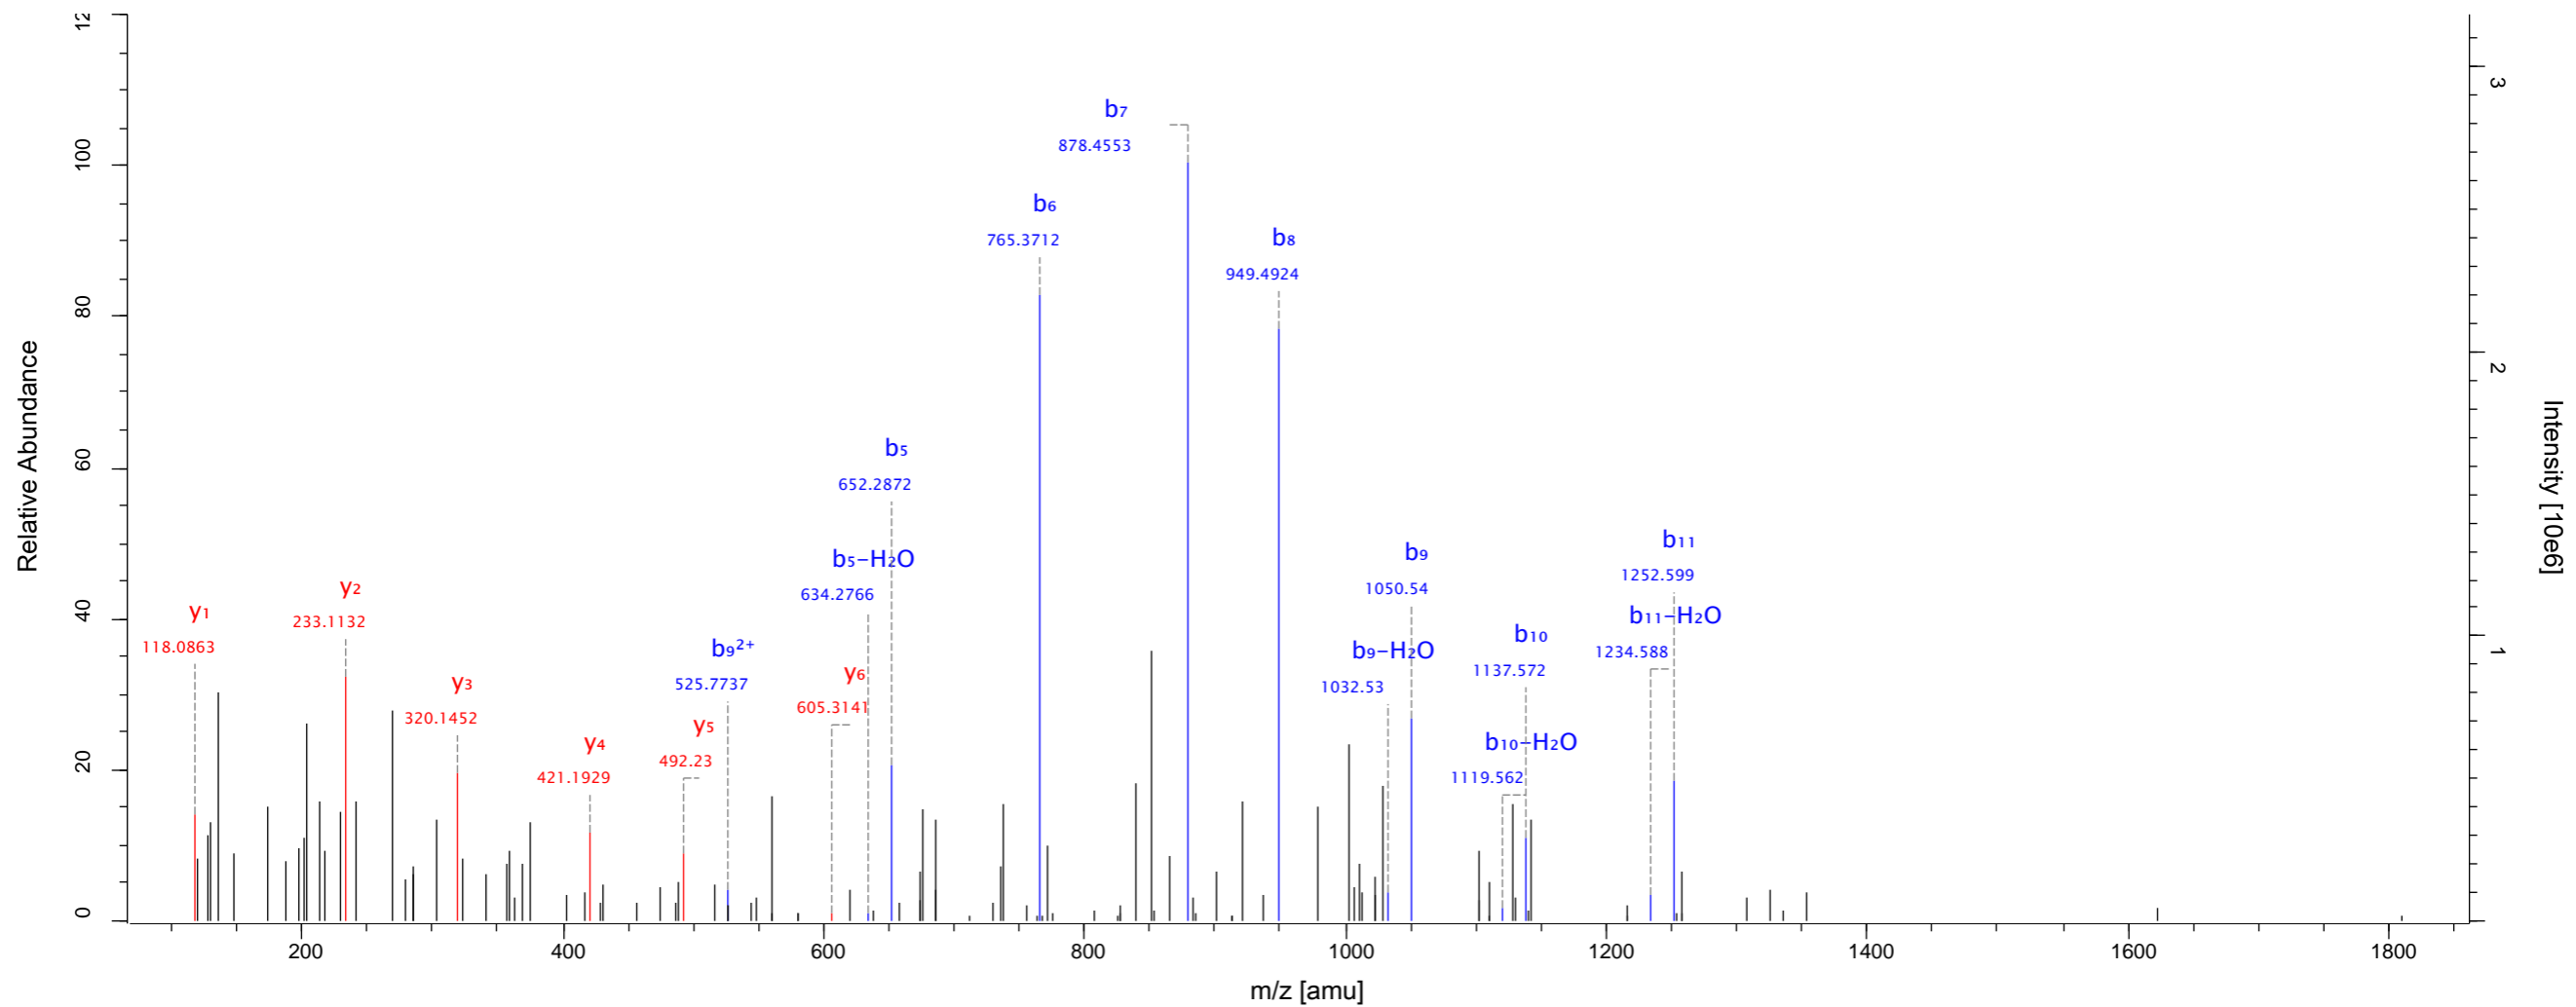

Raw file: 20111212\_EXQ5\_AnMi\_QC\_HCMVp1\_4  
 Scan number: 34633  
 Protein: ORFL299W + NC\_006273.2[185047,185685]+ <unknown description>  
 Peptide score: 123.35  
 Method: FTMS; HCD

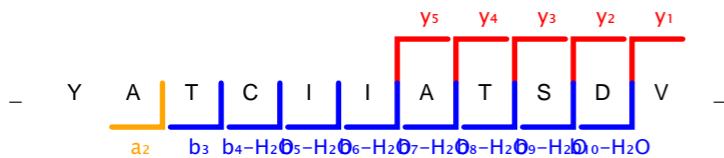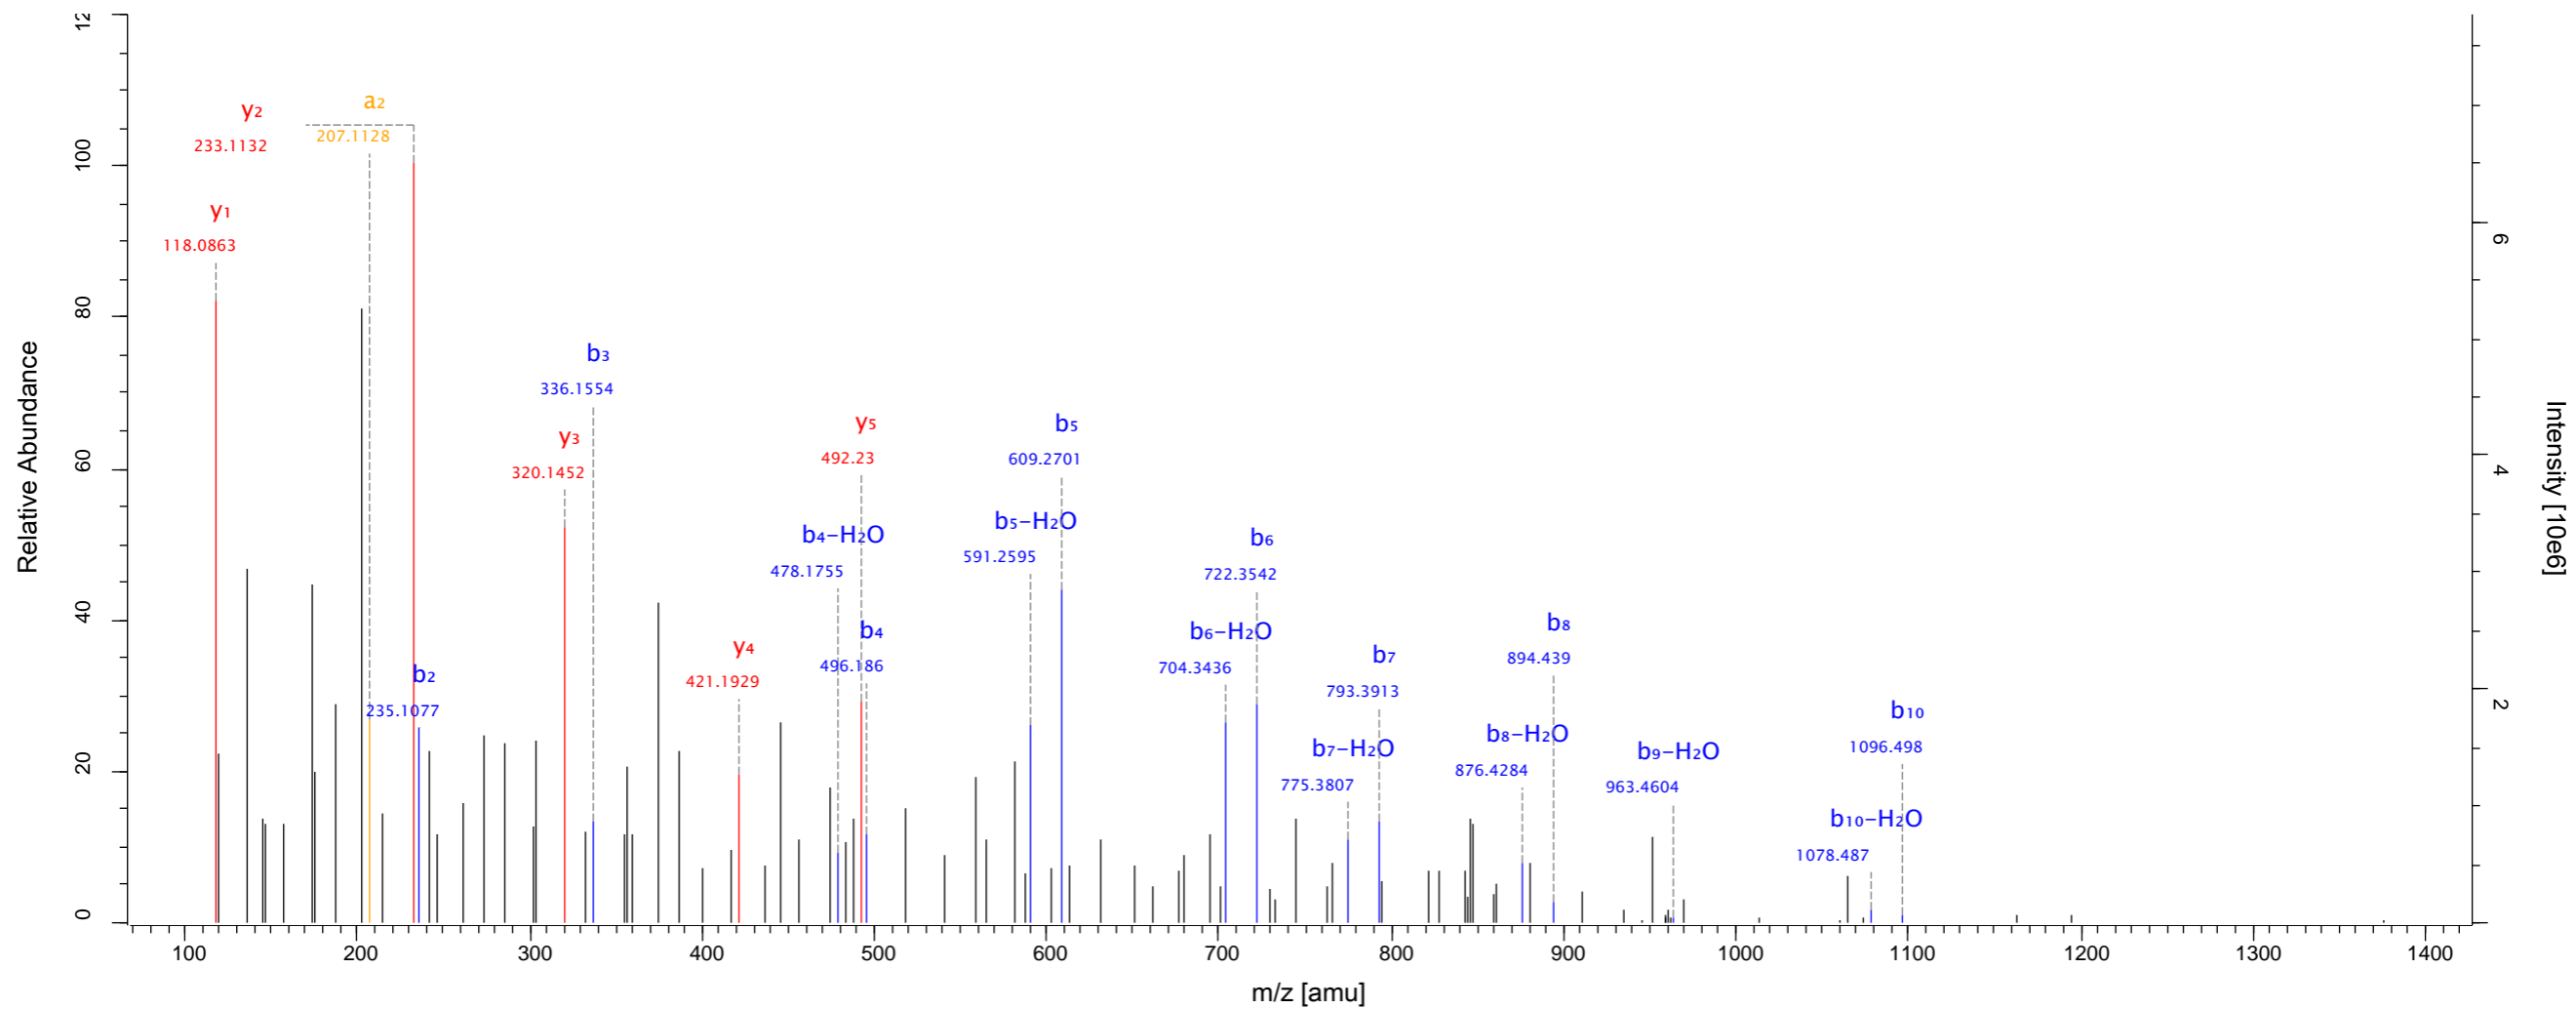

Raw file: 20111212\_EXQ5\_AnMi\_QC\_HCMVp1\_4  
 Scan number: 36278  
 Protein: ORFL82W + NC\_006273.2[36796,37488]+ <unknown description>  
 Peptide score: 121.64  
 Method: FTMS; HCD

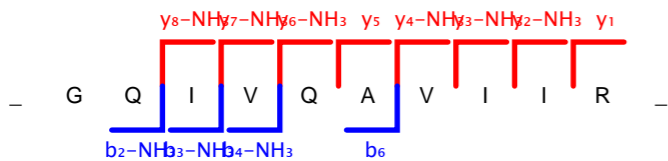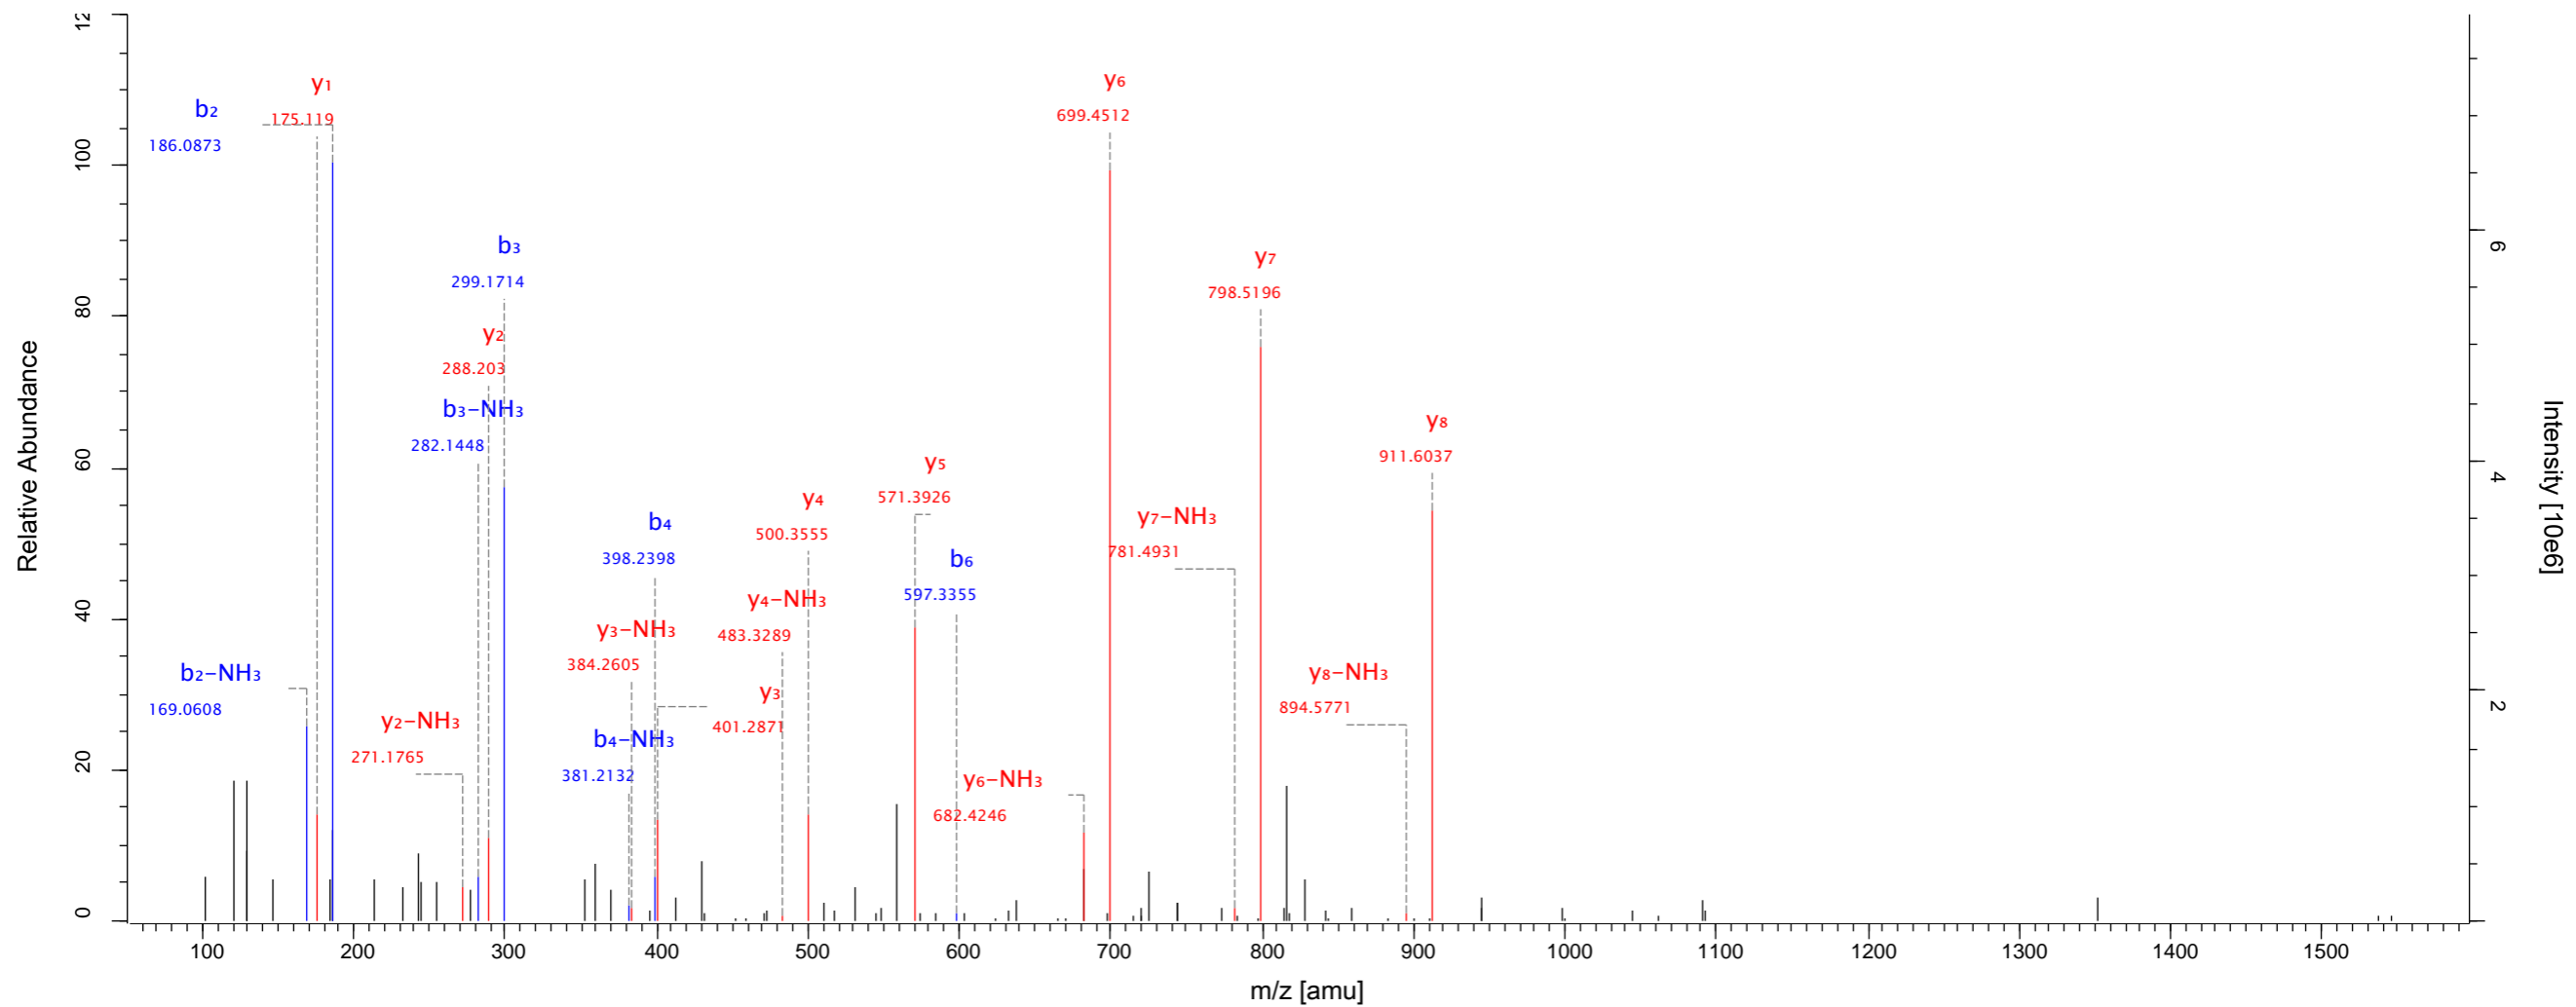

Raw file: 20111212\_EXQ5\_AnMi\_QC\_HCMVp1\_4  
Scan number: 5453  
Protein: ORFL103C - NC\_006273.2[52569,53060]- <unknown description>  
Peptide score: 220.94  
Method: FTMS; HCD

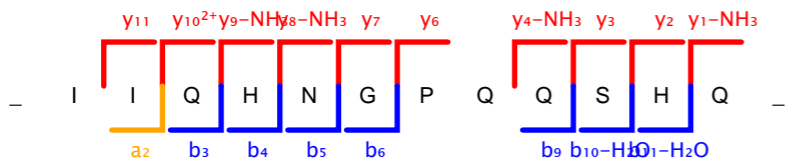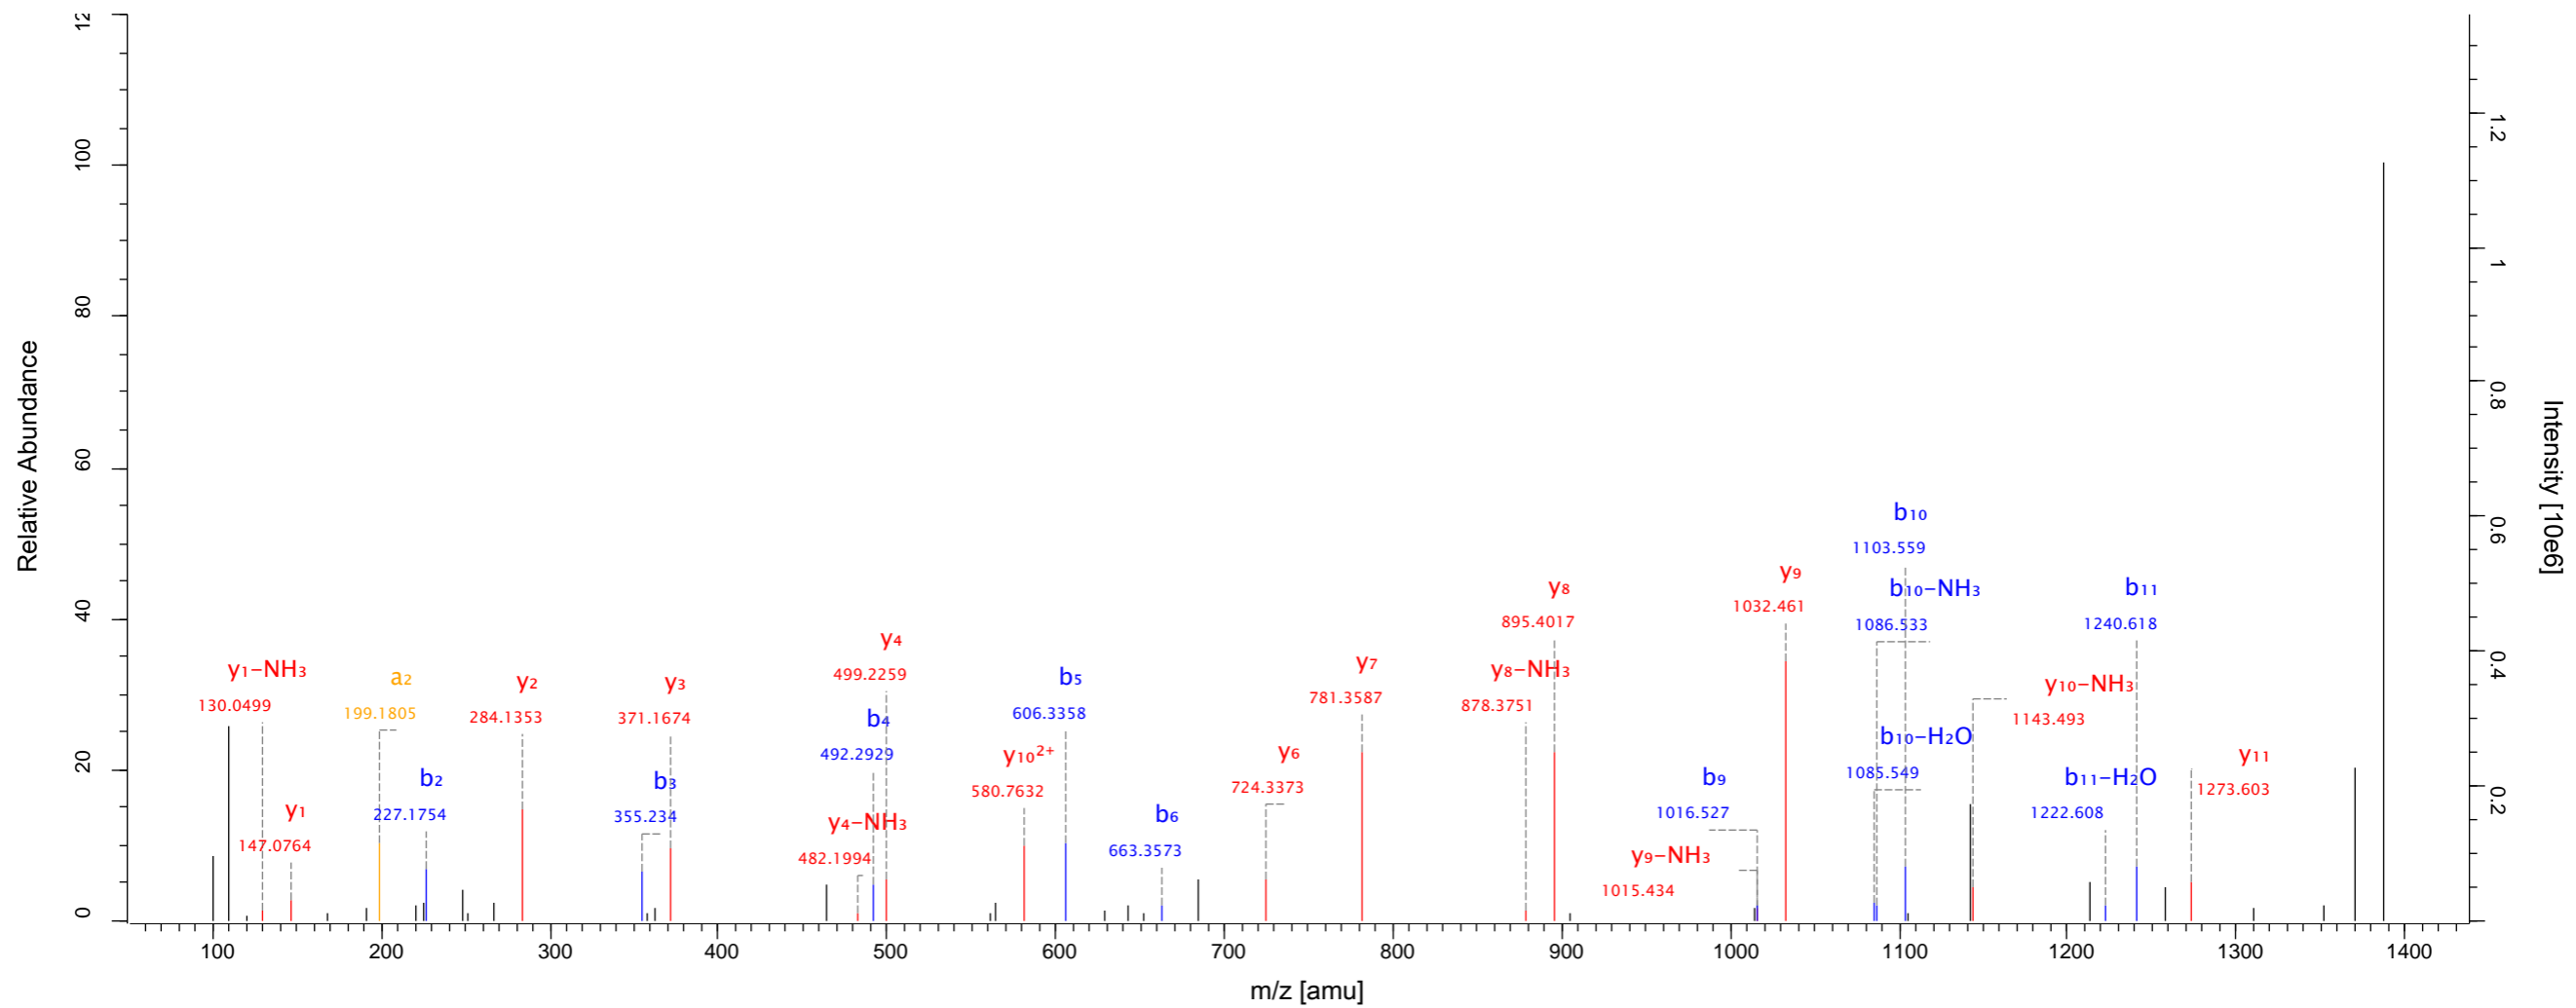

Raw file: 20111212\_EXQ5\_AnMi\_QC\_HCMVp1\_4  
Scan number: 6287  
Protein: ORFL103C - NC\_006273.2[52569,53060]- <unknown description>  
Peptide score: 76.73  
Method: FTMS; HCD

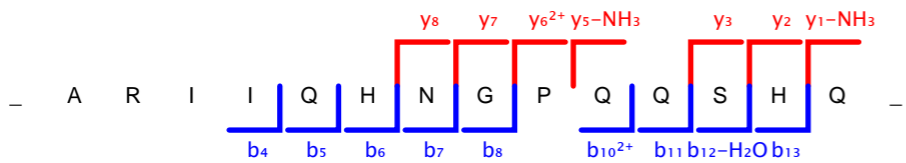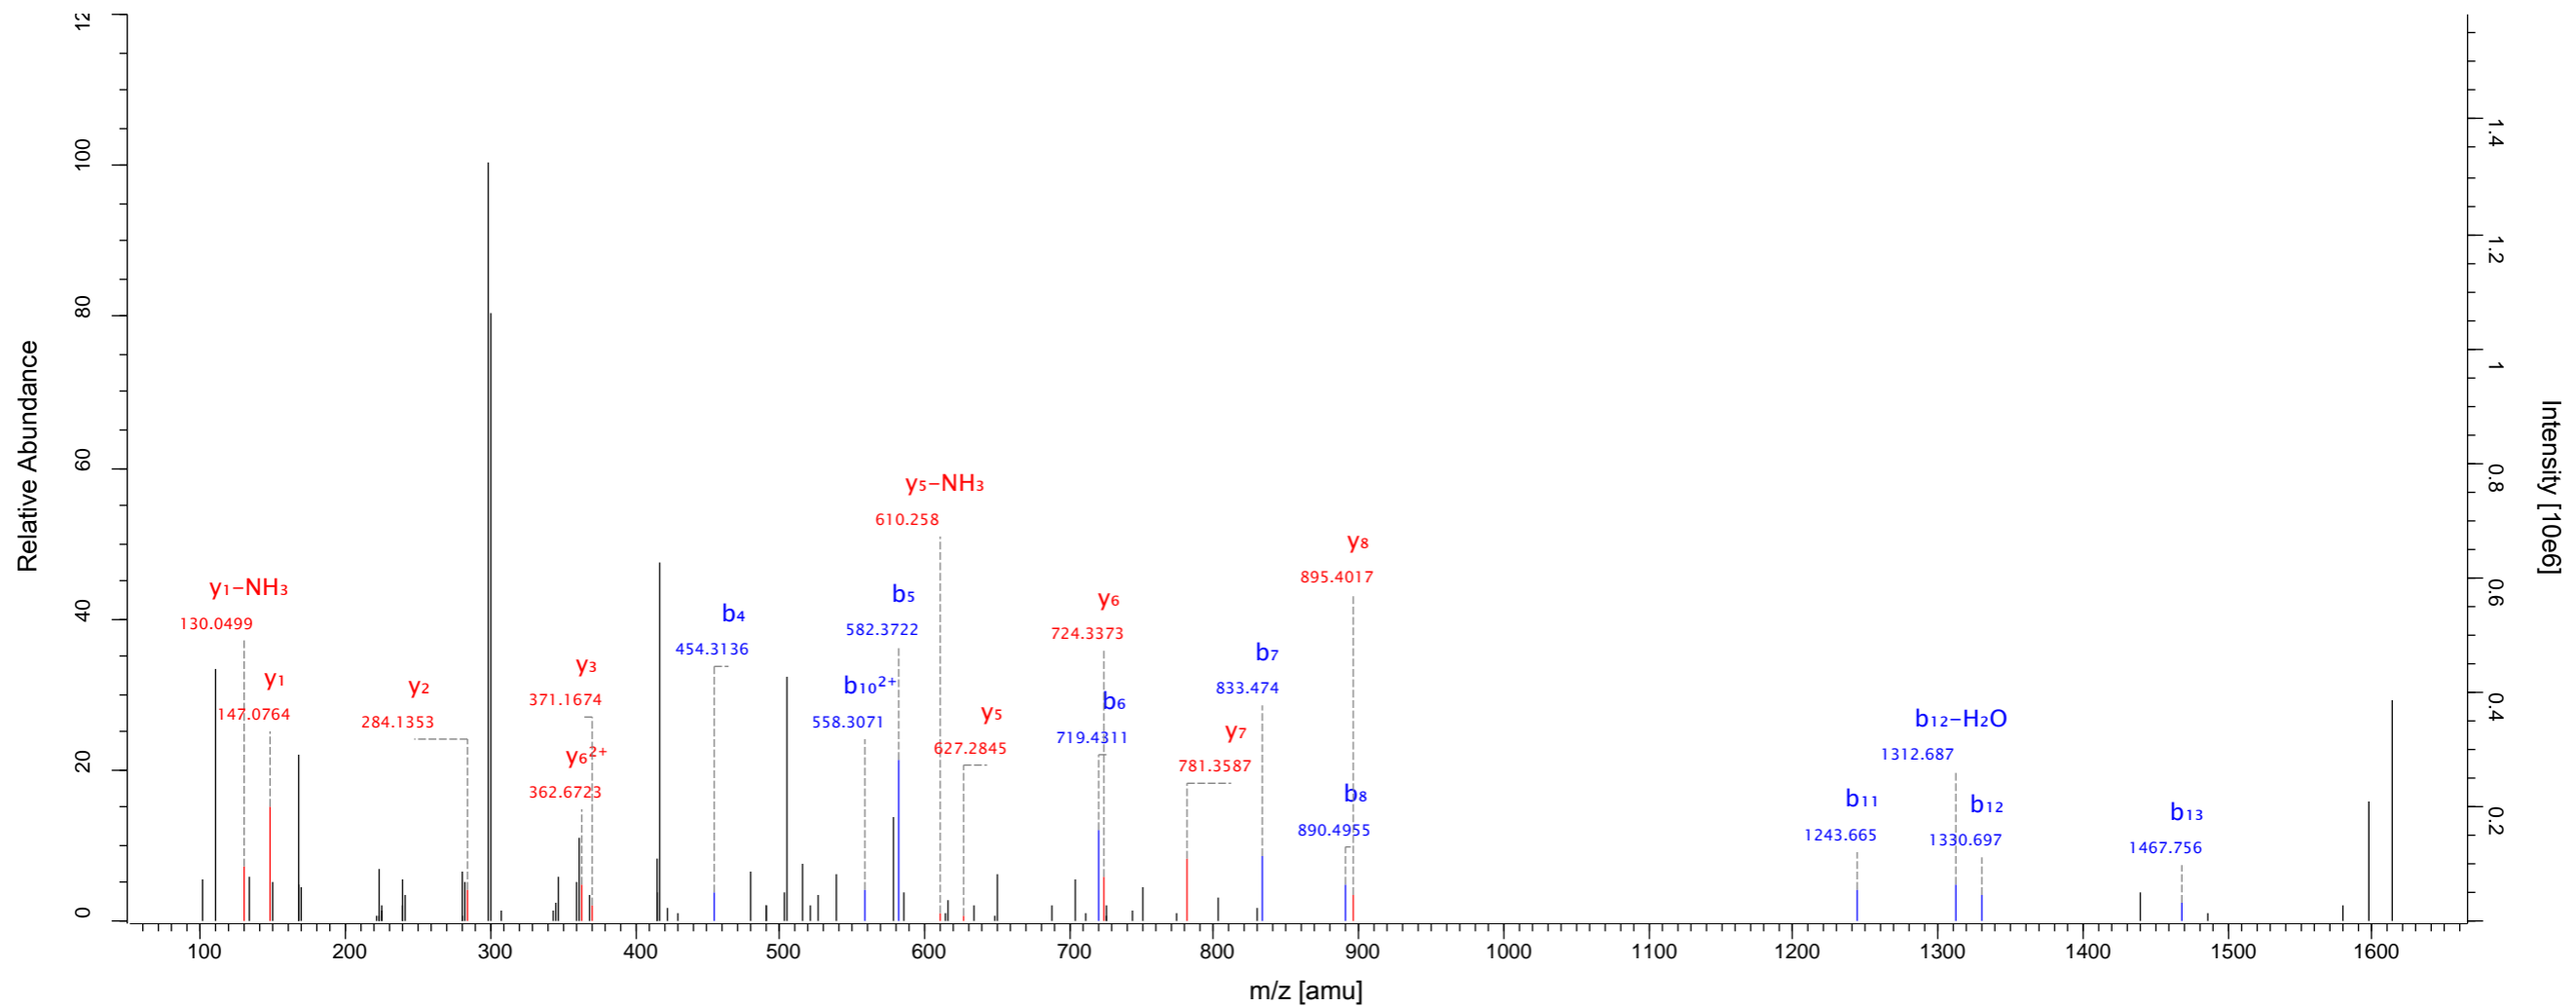

Raw file: 20111212\_EXQ5\_AnMi\_QC\_HCMVp1\_4  
Scan number: 8977  
Protein: ORFL82W + NC\_006273.2[36796,37488]+ <unknown description>  
Peptide score: 143.79  
Method: FTMS; HCD

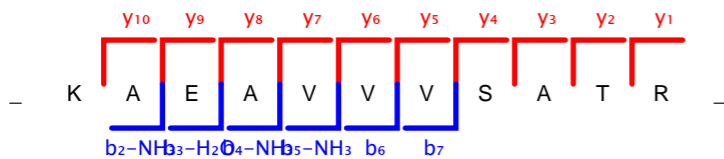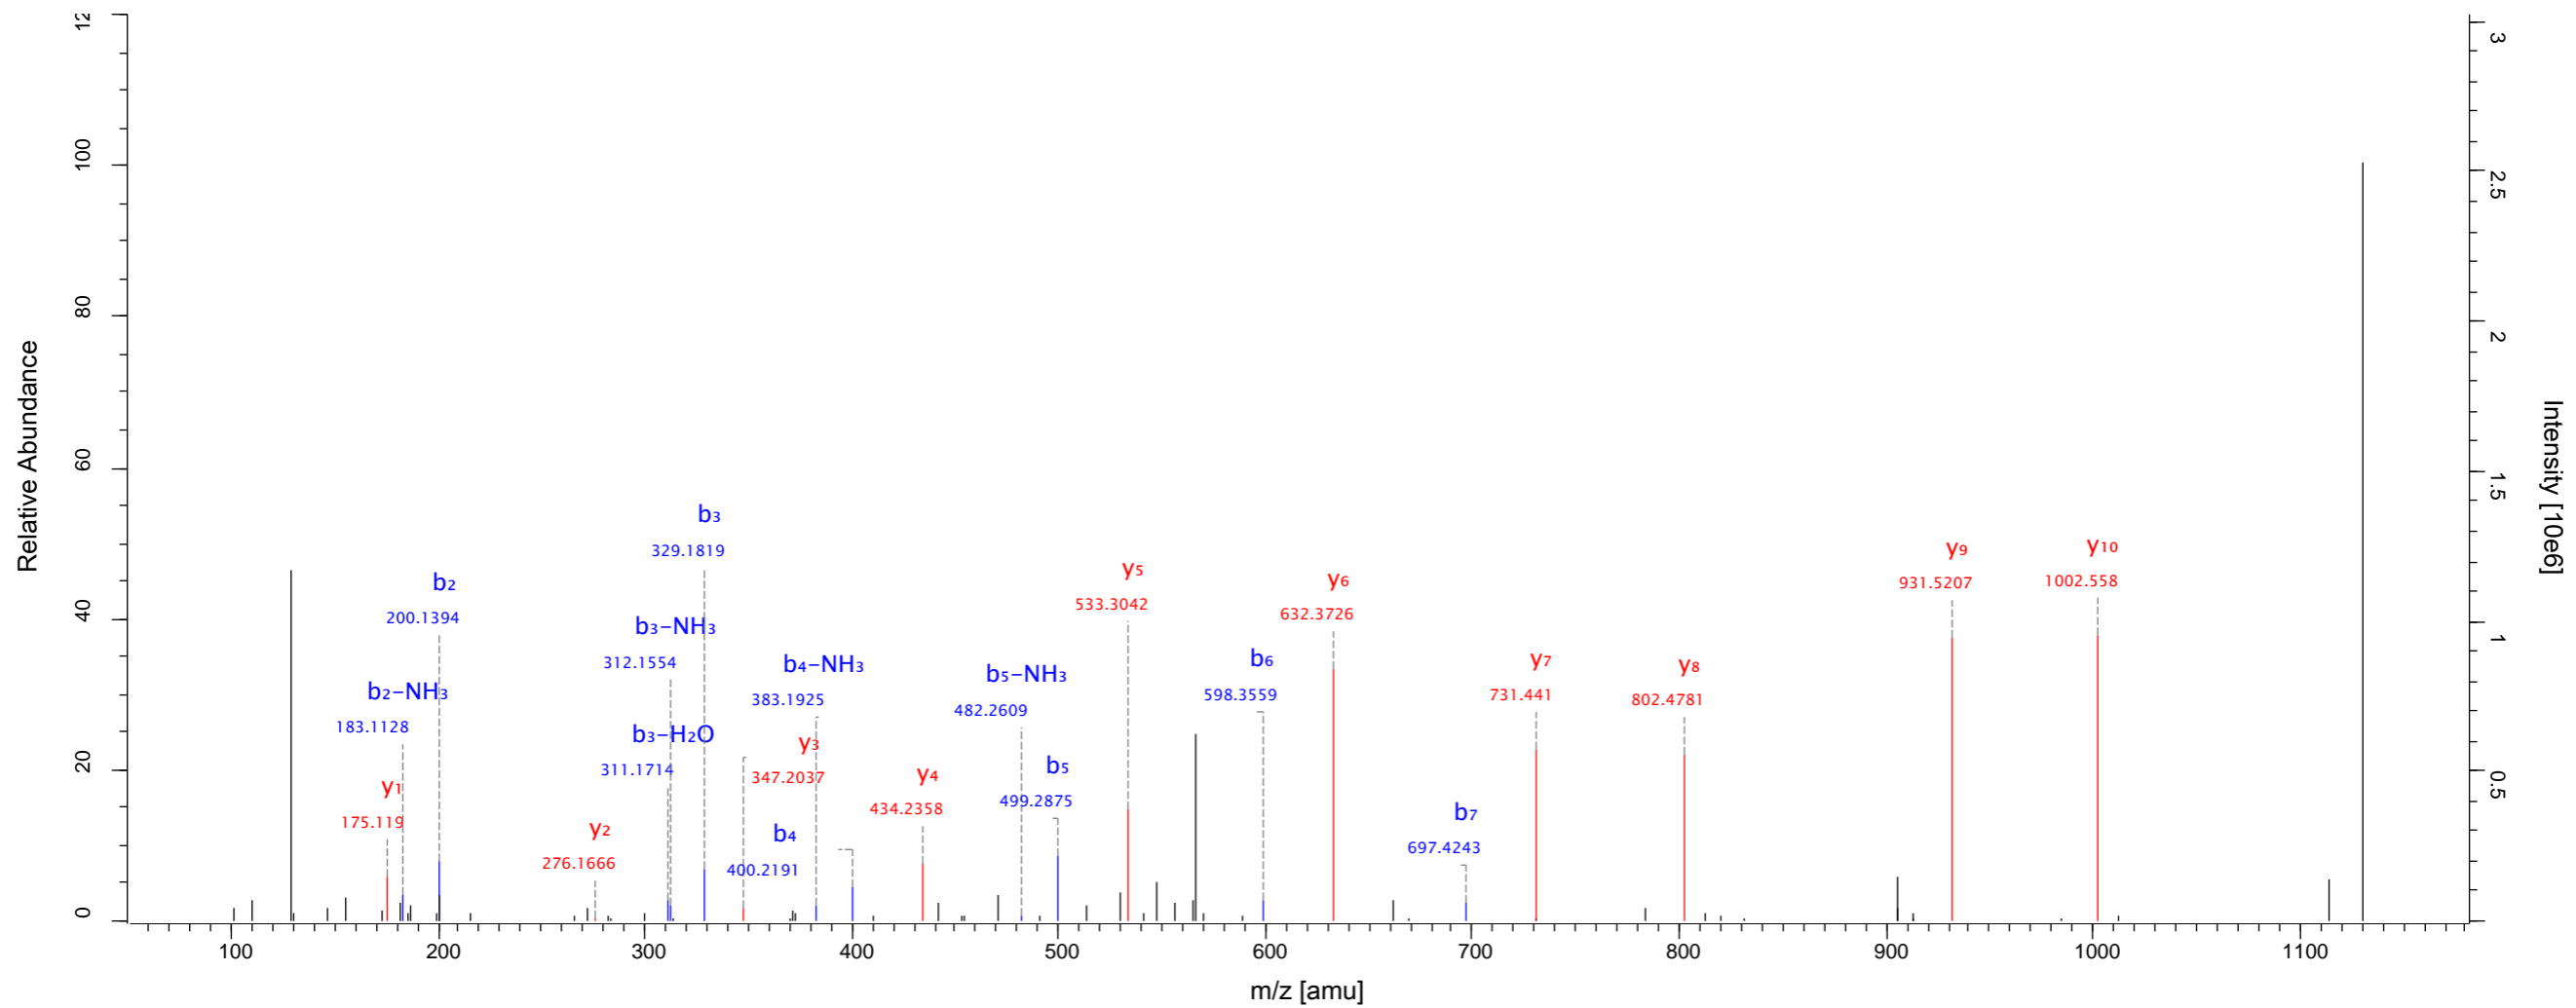



Raw file: 20111212\_EXQ5\_AnMi\_QC\_HCMVp1\_5

Scan number: 17119

Protein: ORFL321W + NC\_006273.2[191968,194126]+ <unknown description>; ORFL321W.iORF1 + NC\_006273.2[191968,194126]+ <unknown description>; ORFL321W.iORF4 + NC\_006273.2[193200,194126]+ <unknown description>

Peptide score: 94.01

Method: FTMS; HCD

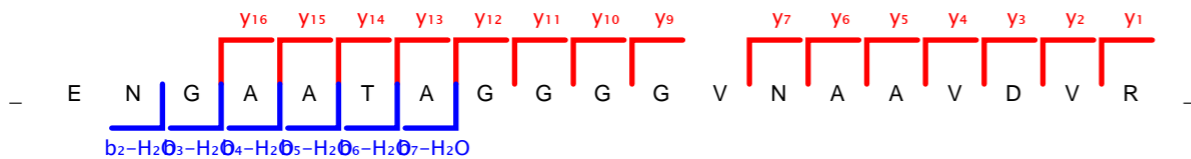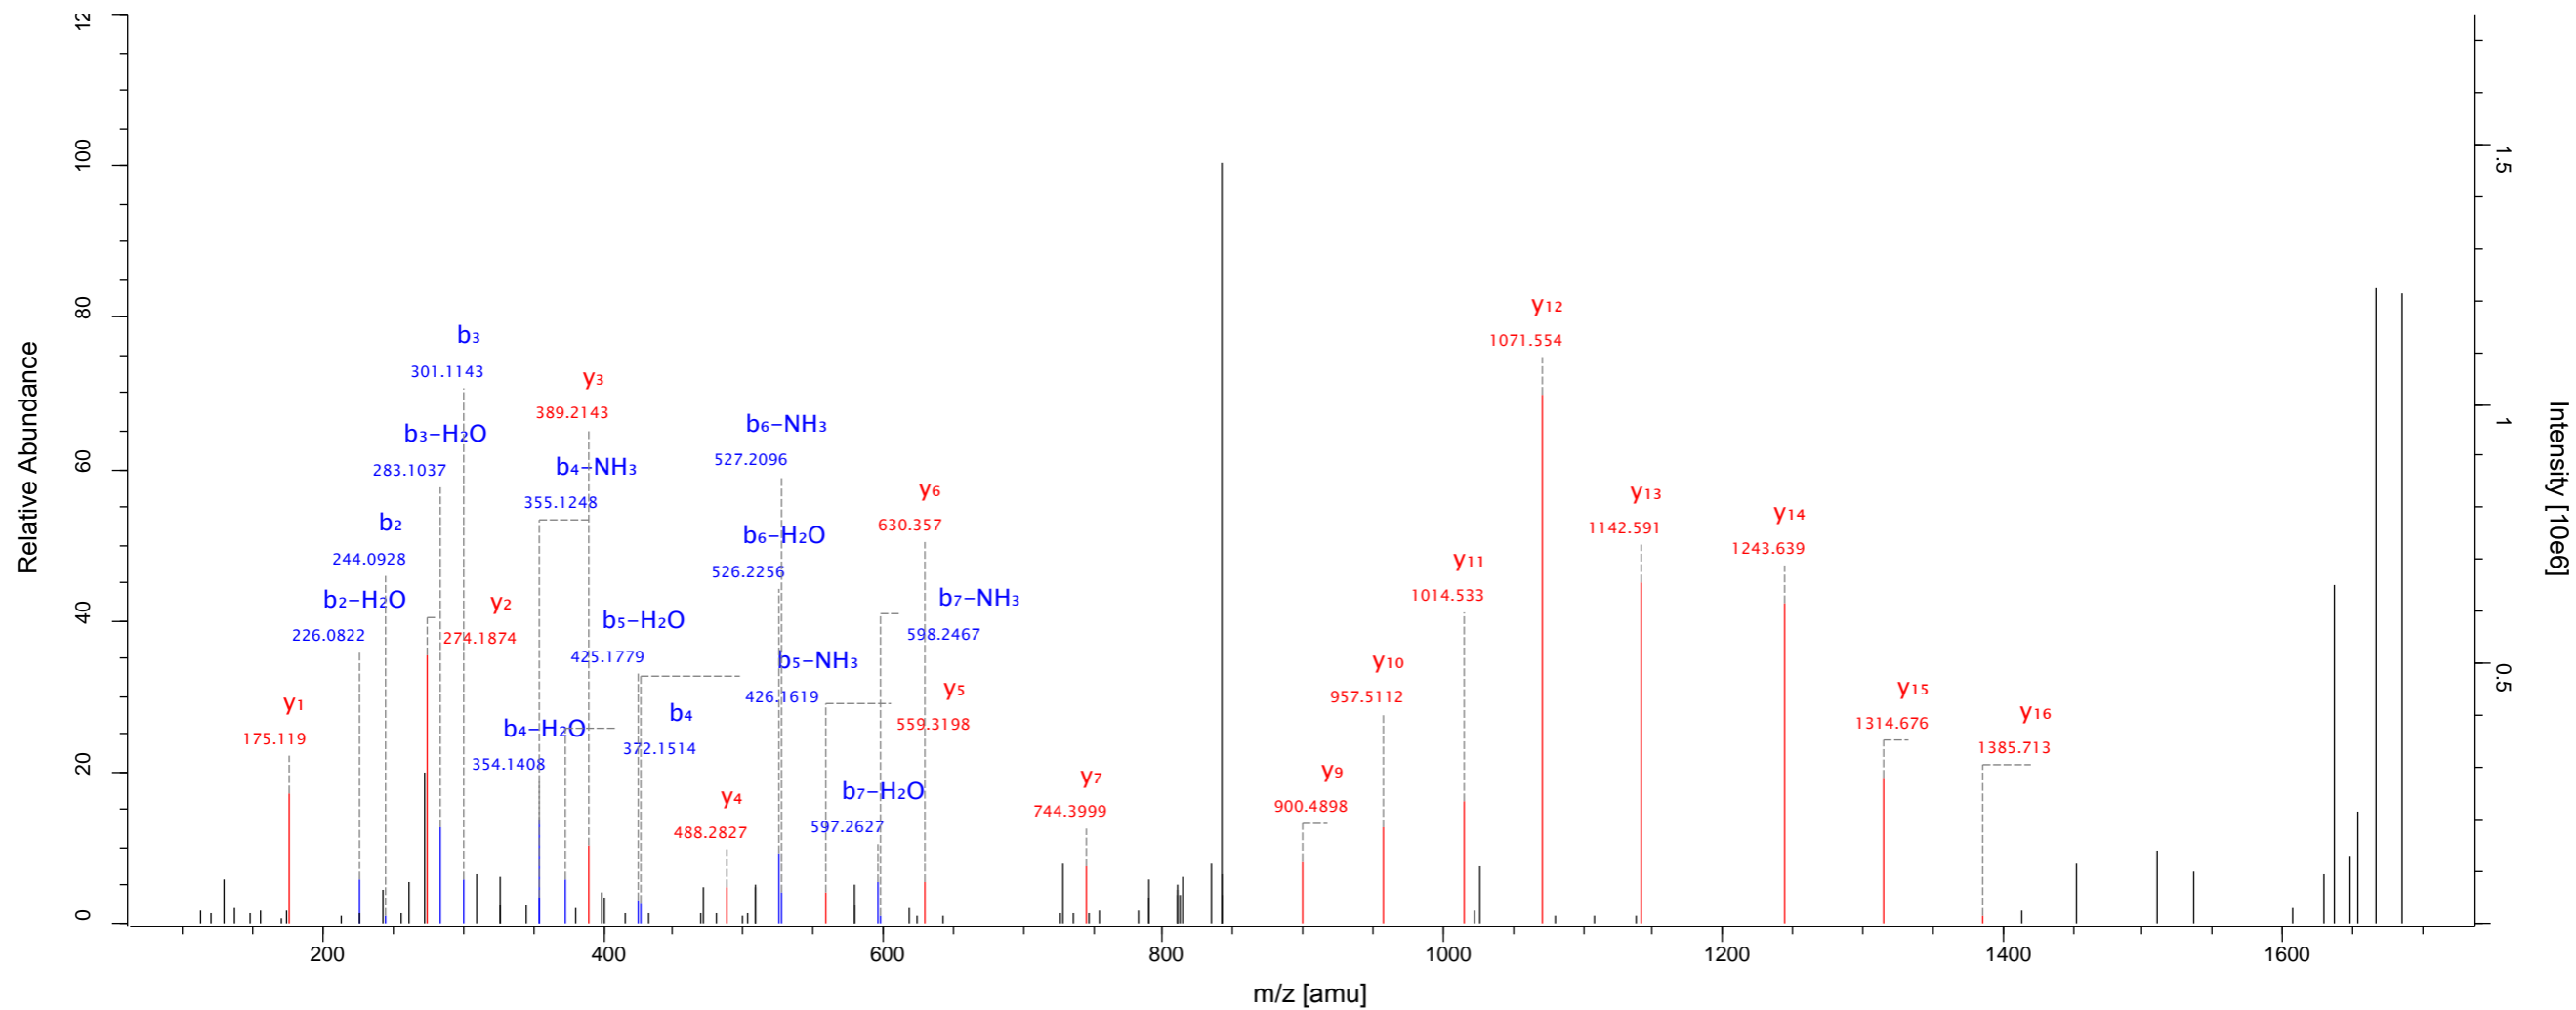

Raw file: 20111212\_EXQ5\_AnMi\_QC\_HCMVp1\_5  
 Scan number: 8082  
 Protein: ORFL321W + NC\_006273.2[191968,194126]+ <unknown description>; ORFL321W.iORF1 + NC\_006273.2[191968,194126]+ <unknown description>; ORFL321W.iORF4 + NC\_006273.2[193200,194126]+ <unknown description>  
 Peptide score: 132.78  
 Method: FTMS; HCD

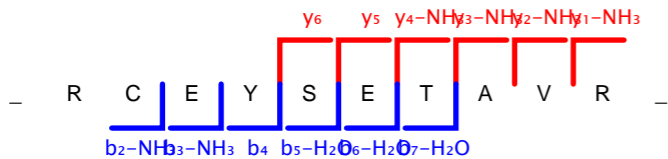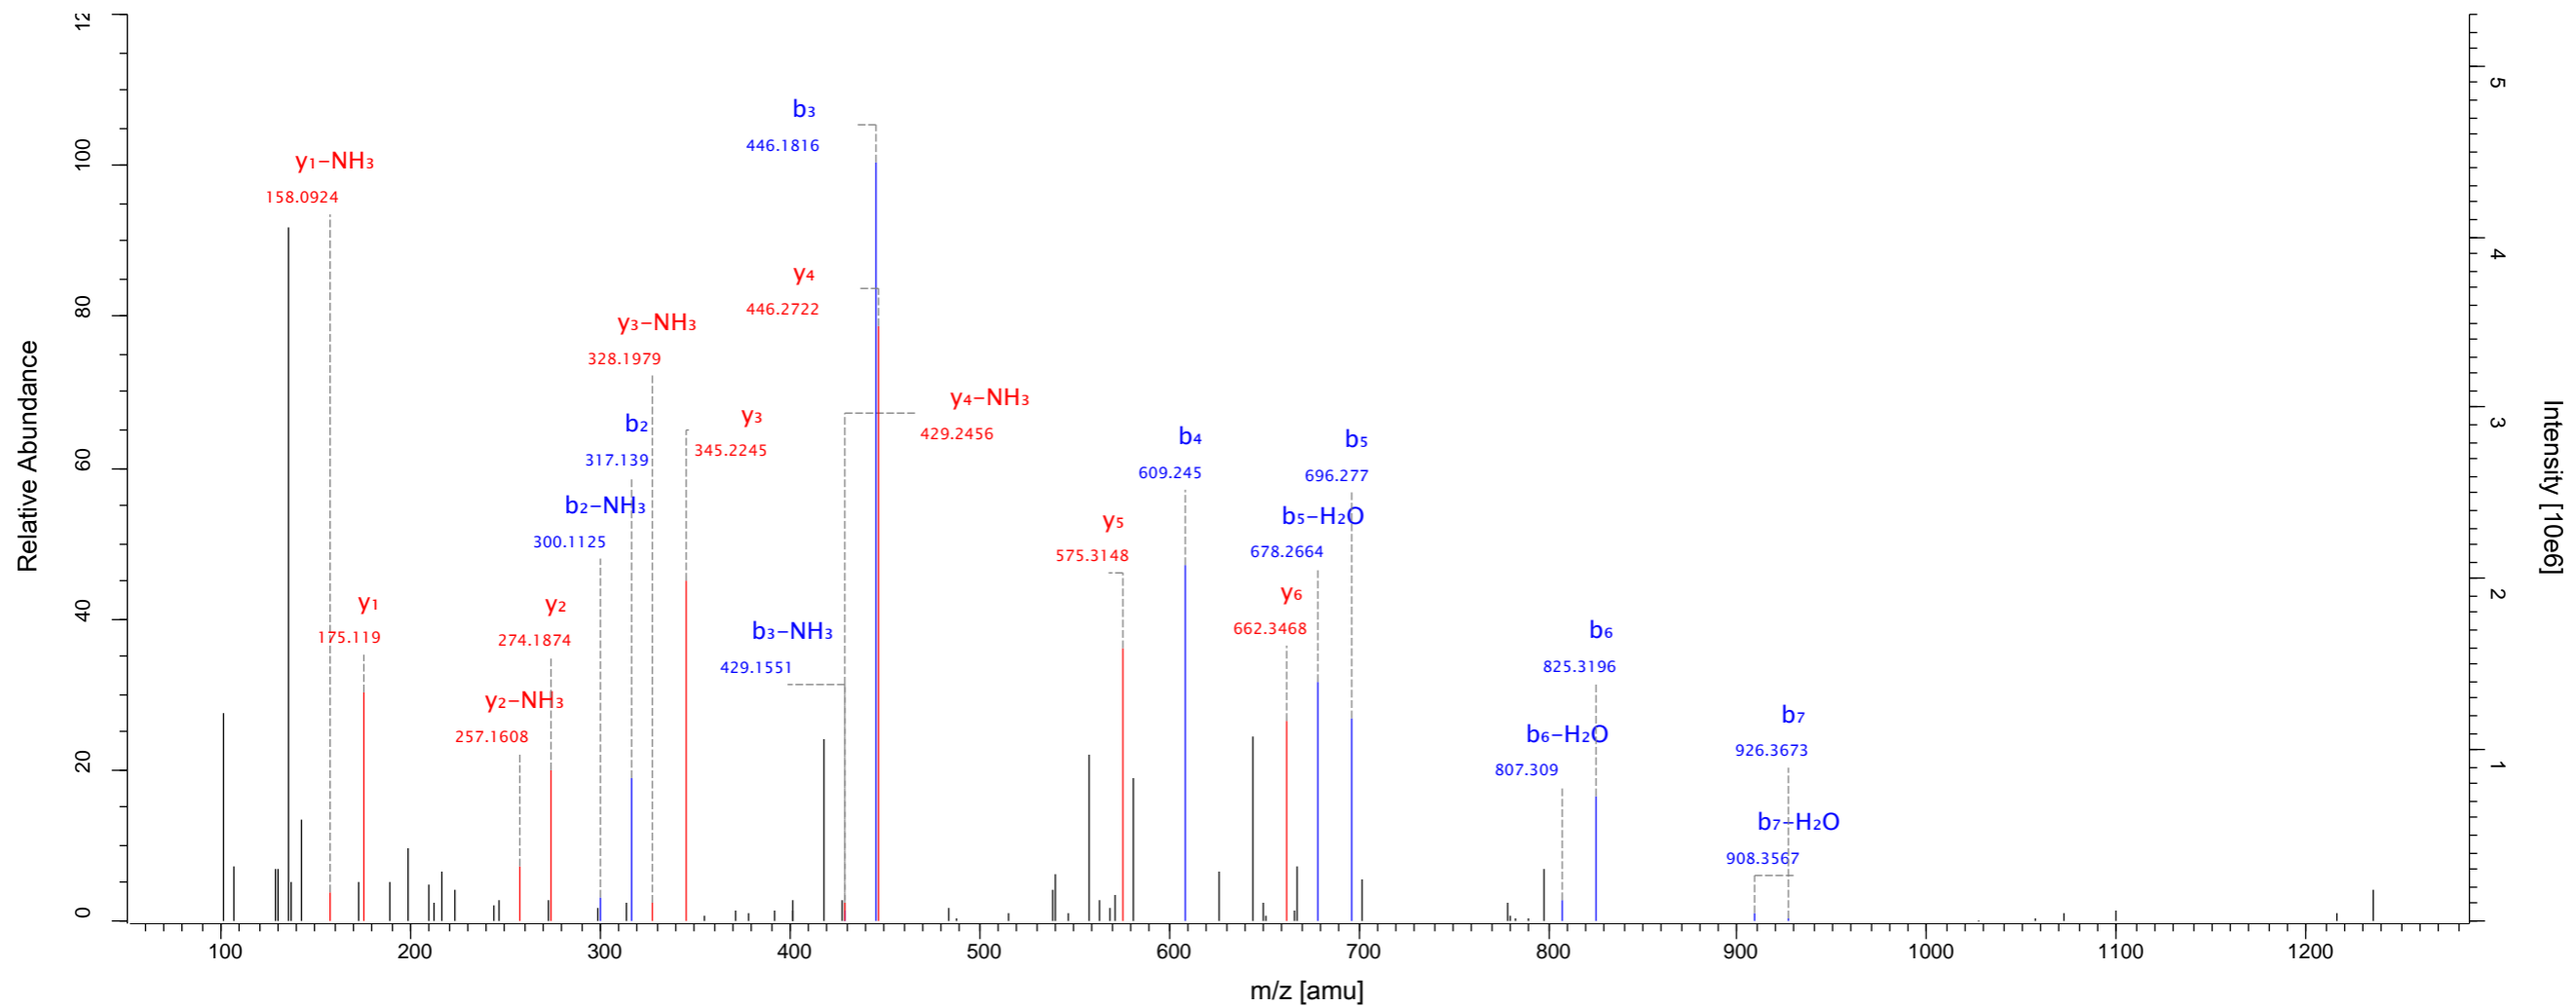

Raw file: 20111212\_EXQ5\_AnMi\_QC\_HCMVp1\_6  
Scan number: 10225  
Protein: ORFL253W.iORF2 + NC\_006273.2[161917,163431]+ <unknown description>  
Peptide score: 59.25  
Method: FTMS; HCD

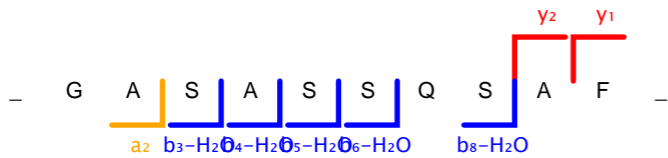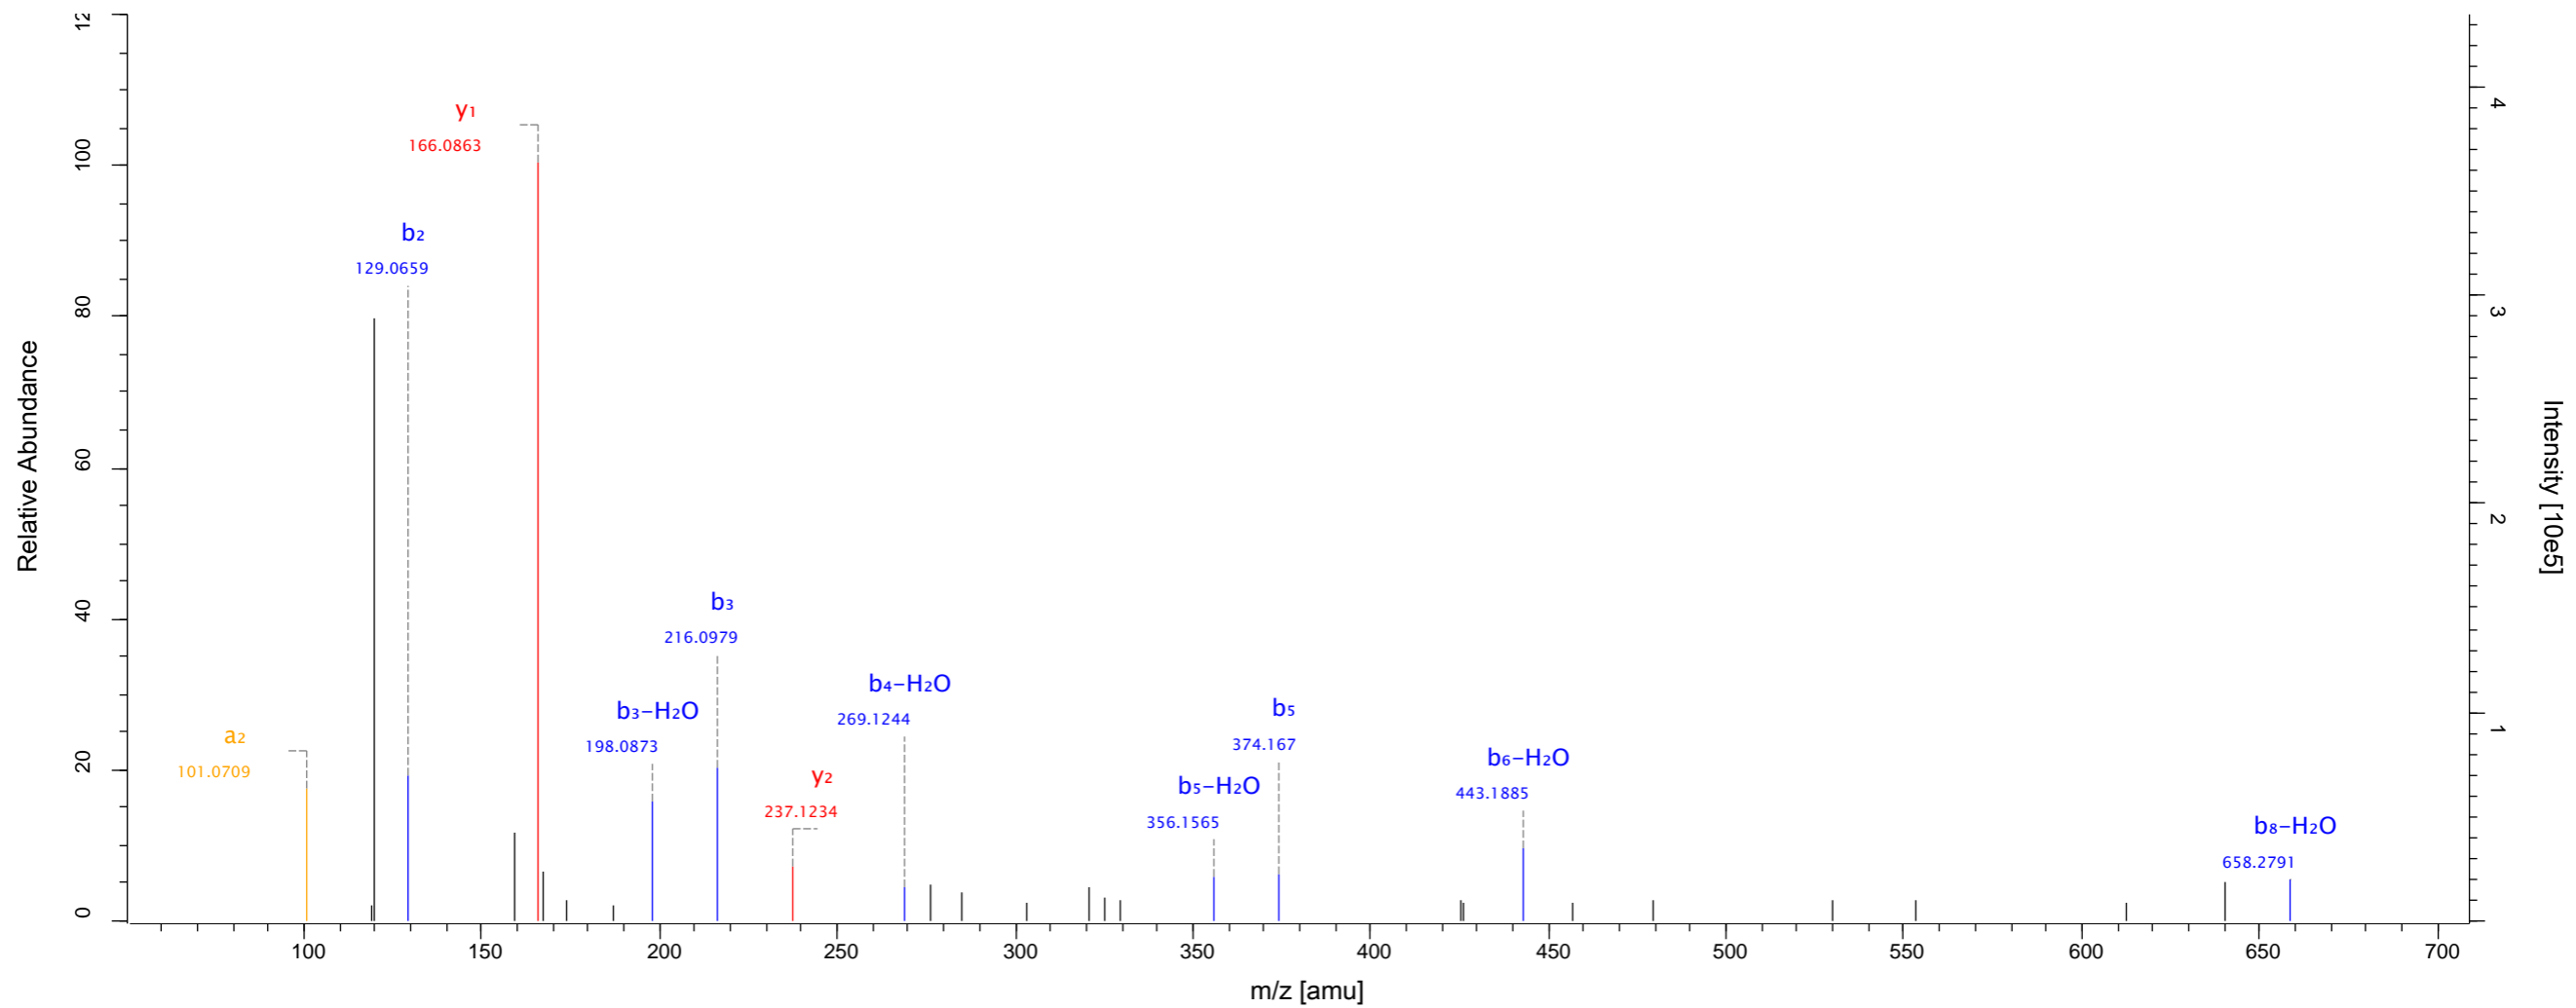

Raw file: 20111212\_EXQ5\_AnMi\_QC\_HCMVp1\_6

Scan number: 30601

Protein: ORFL321W + NC\_006273.2[191968,194126]+ <unknown description>; ORFL321W.iORF1 + NC\_006273.2[191968,194126]+ <unknown description>; ORFL321W.iORF4 + NC\_006273.2[193200,194126]+ <unknown description>

Peptide score: 147.26

Method: FTMS; HCD

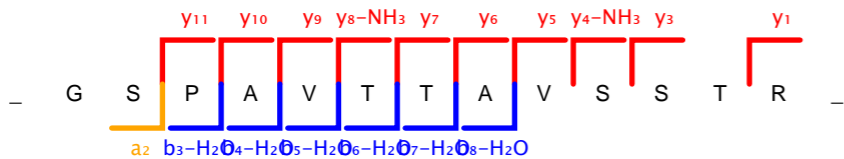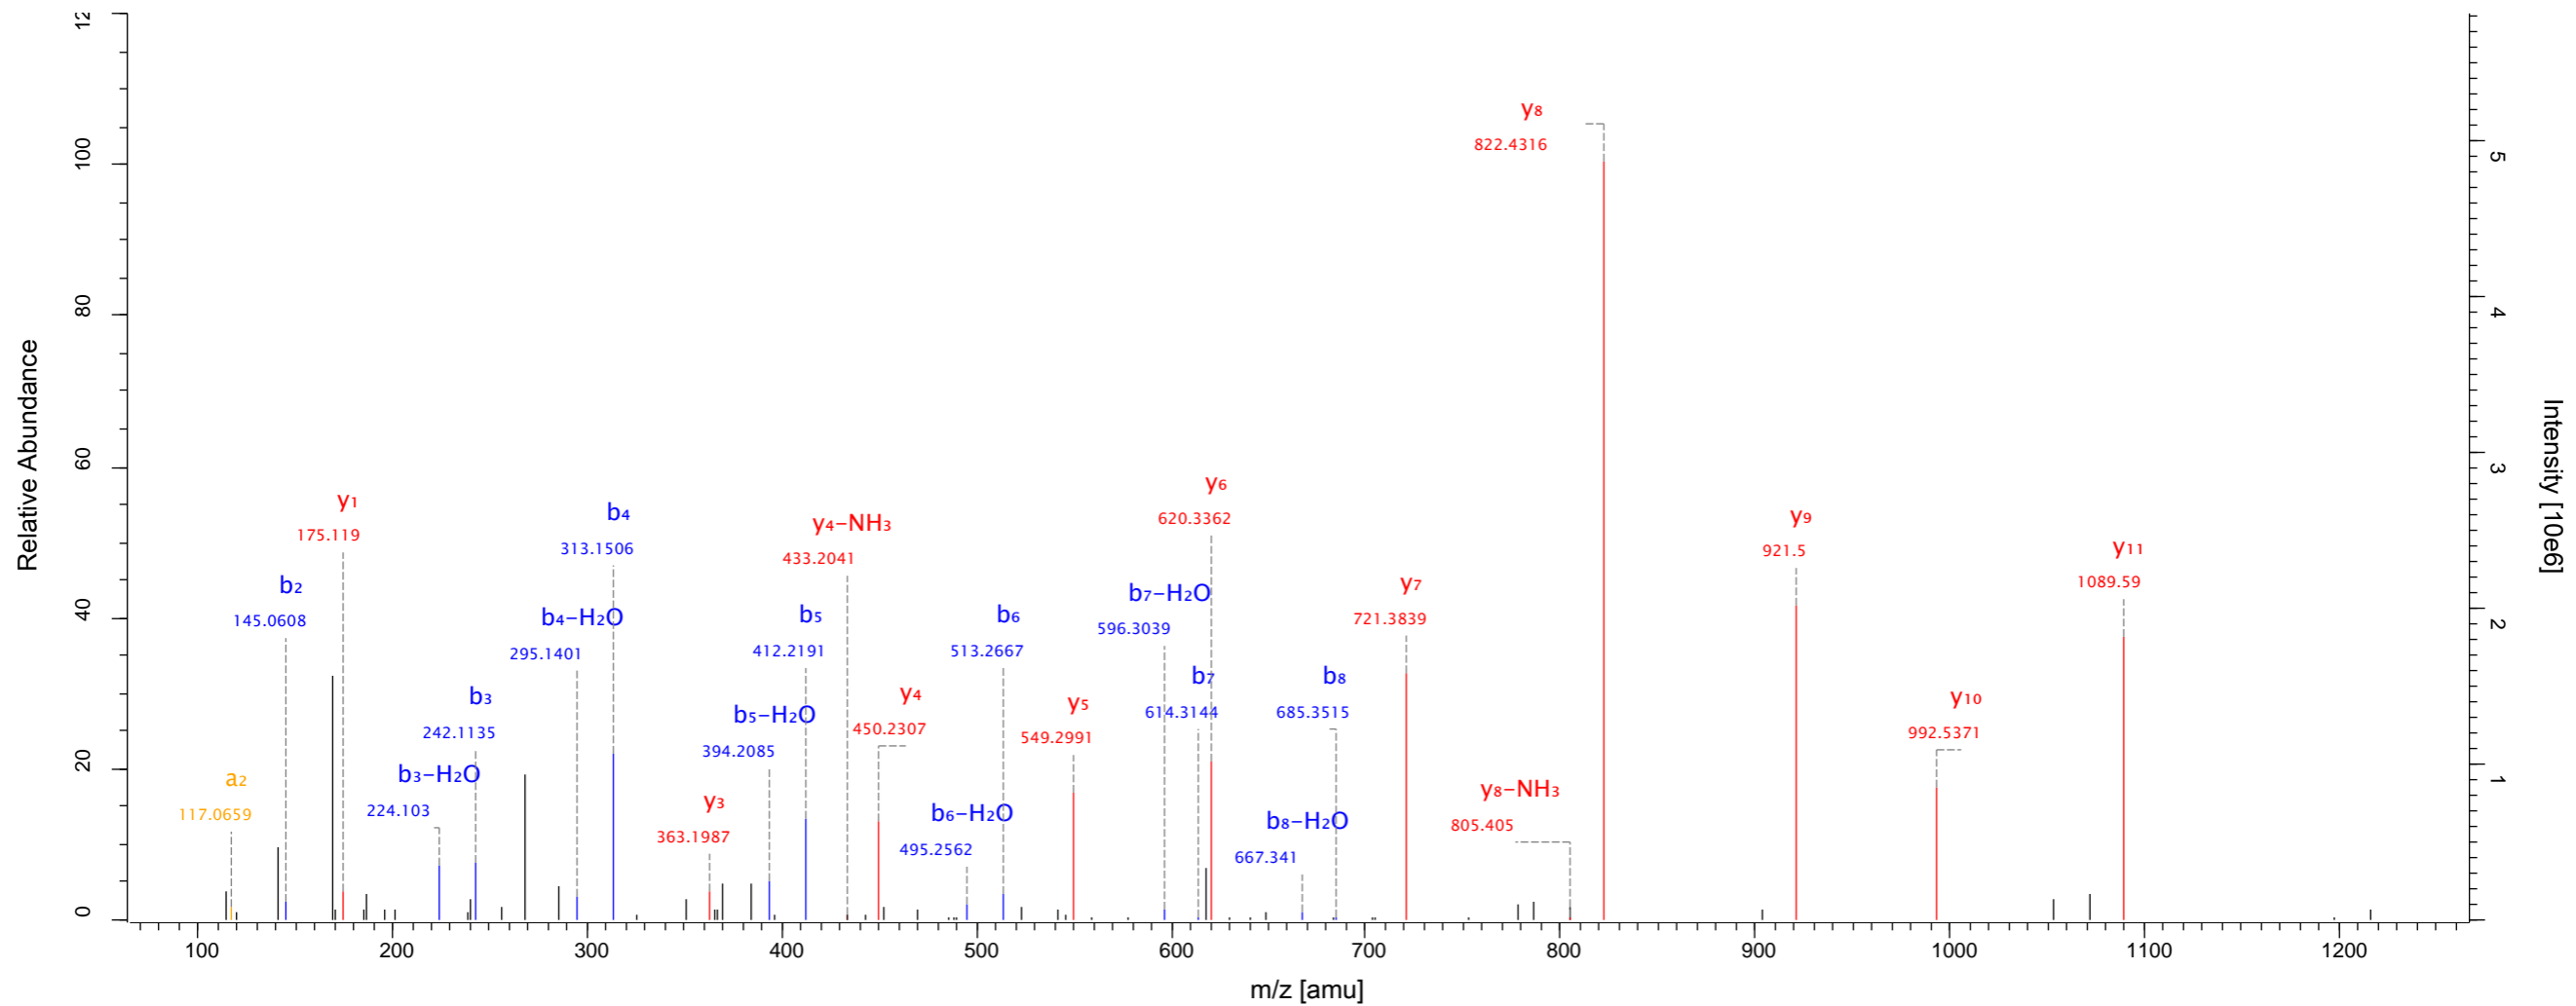

Raw file: 20111212\_EXQ5\_AnMi\_QC\_HCMVp1\_8  
Scan number: 6529  
Protein: ORFL87W + NC\_006273.2[38099,40114]+ <unknown description>  
Peptide score: 149.72  
Method: FTMS; HCD

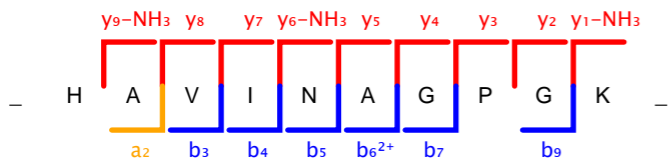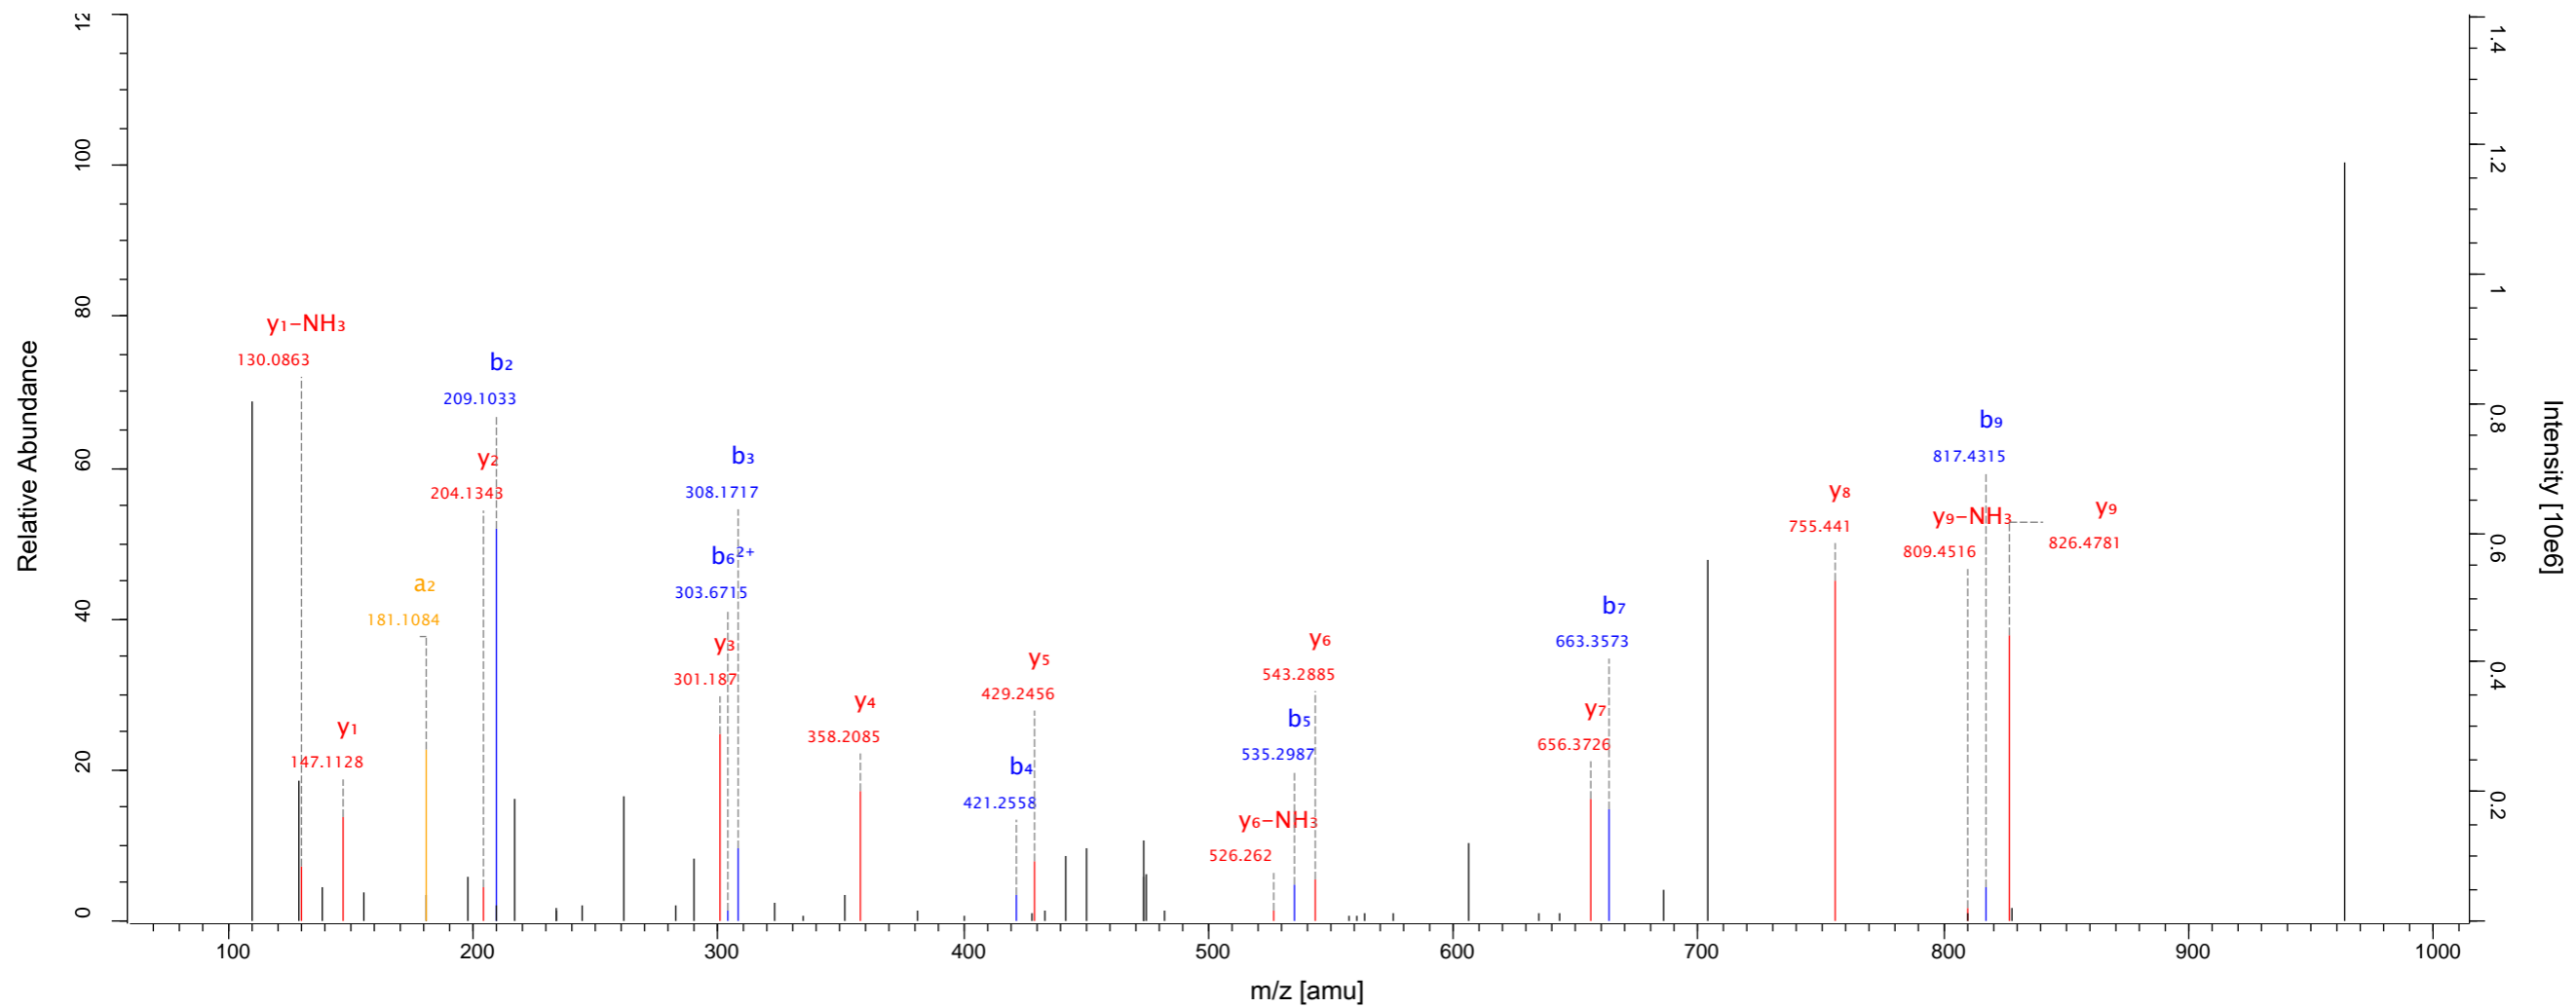

Raw file: 20111212\_EXQ5\_AnMi\_QC\_HCMVp11\_9  
 Scan number: 28063  
 Protein: ORFS366W + NC\_006273.2[227254,227469]+ <unknown description>  
 Peptide score: 181.32  
 Method: FTMS; HCD

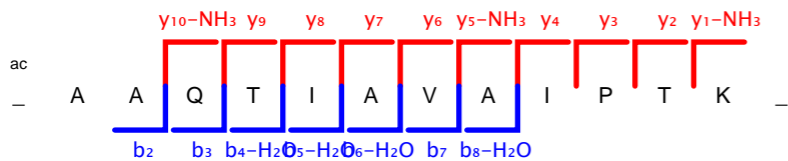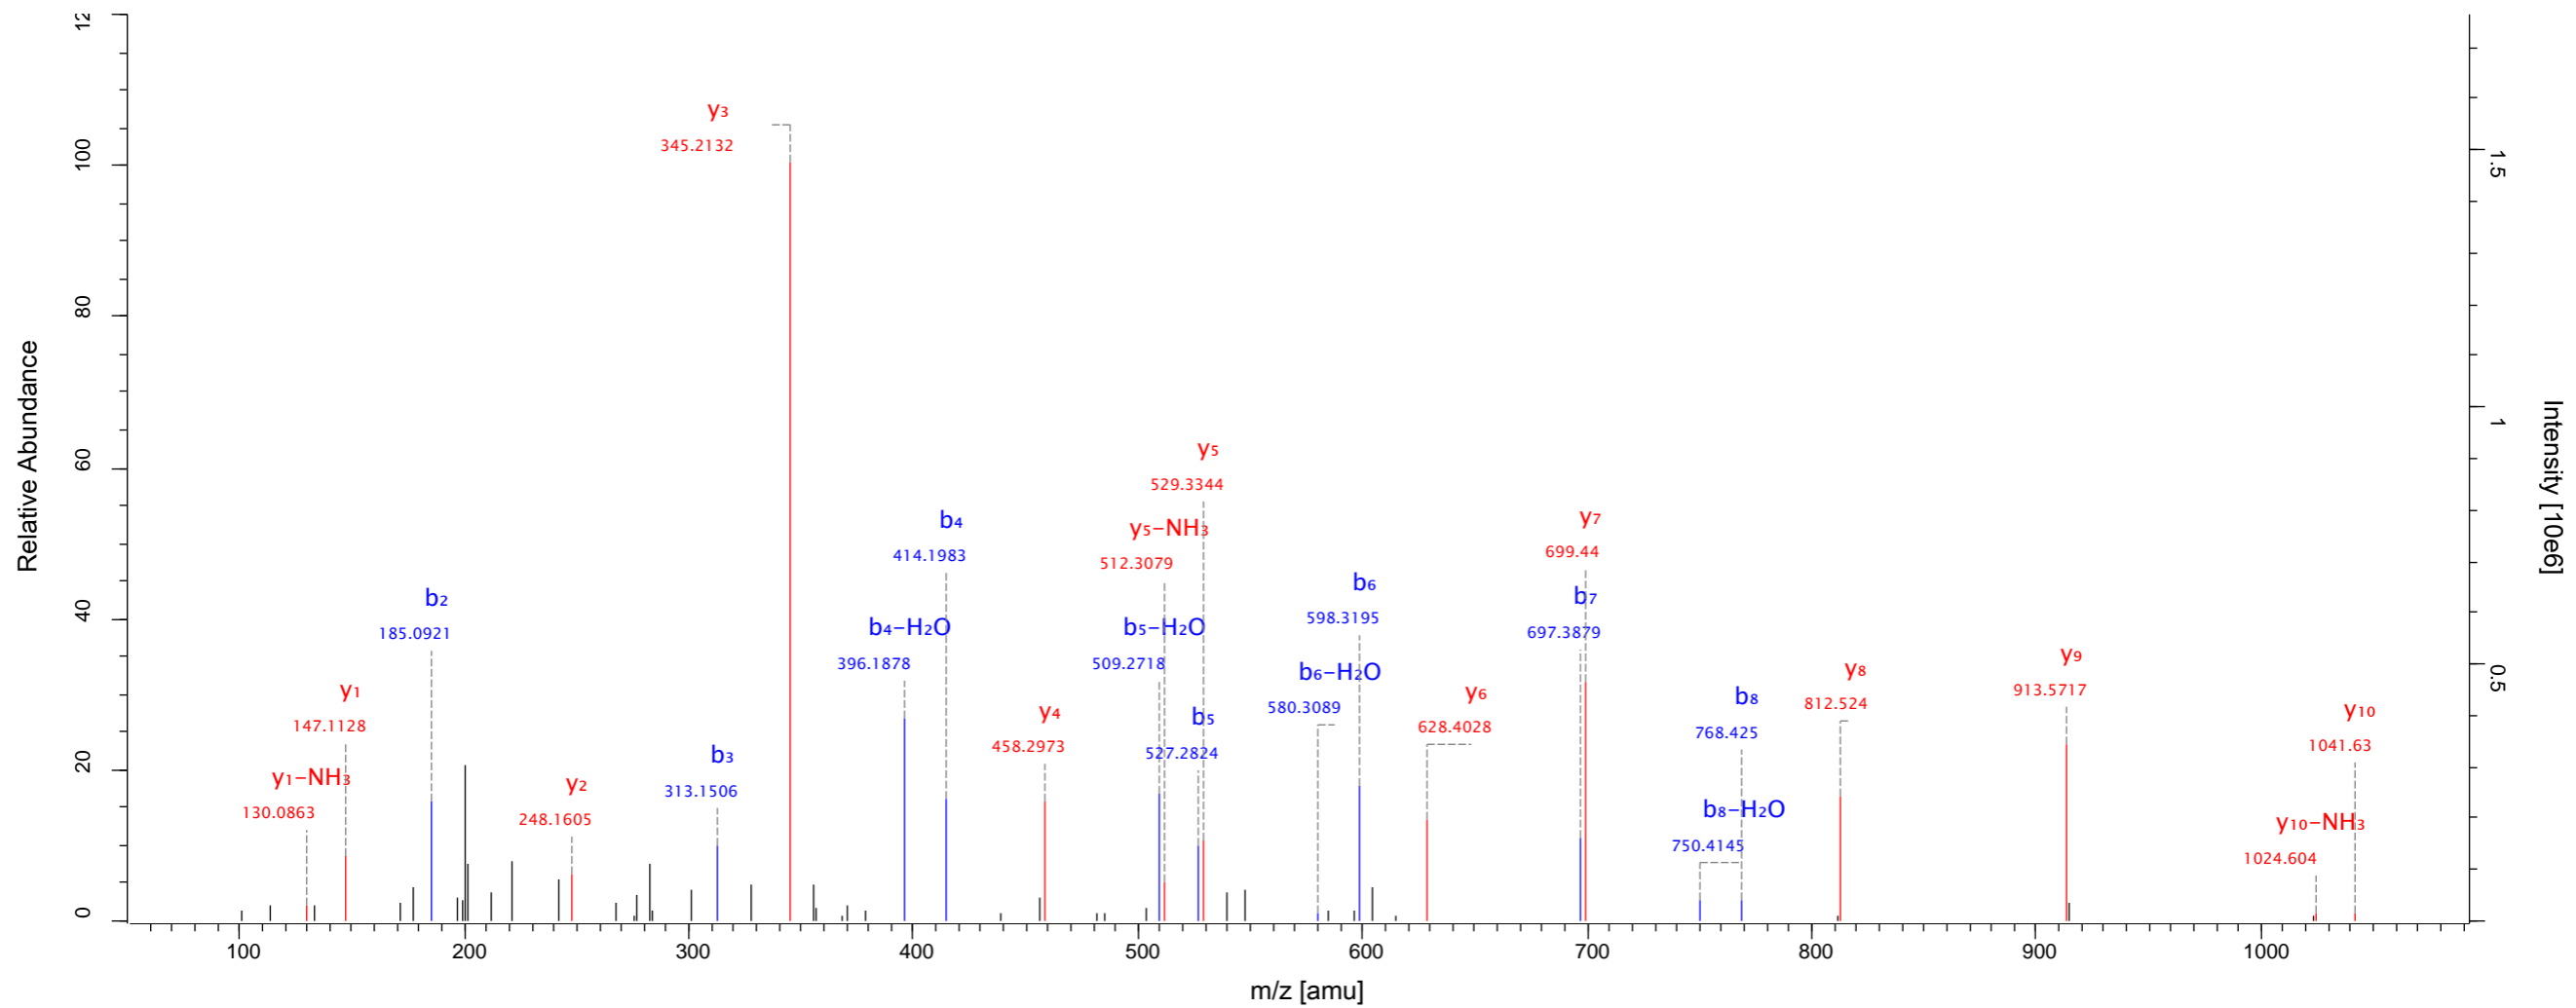

Raw file: 20111212\_EXQ5\_AnMi\_QC\_HCMVp1\_13  
 Scan number: 14848  
 Protein: ORFL131W + NC\_006273.2[73147,73947]+ <unknown description>; ORFL131W.iORF1 + NC\_006273.2[73294,73947]+ <unknown description>  
 Peptide score: 177.04  
 Method: FTMS; HCD

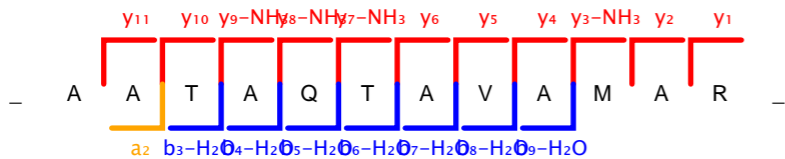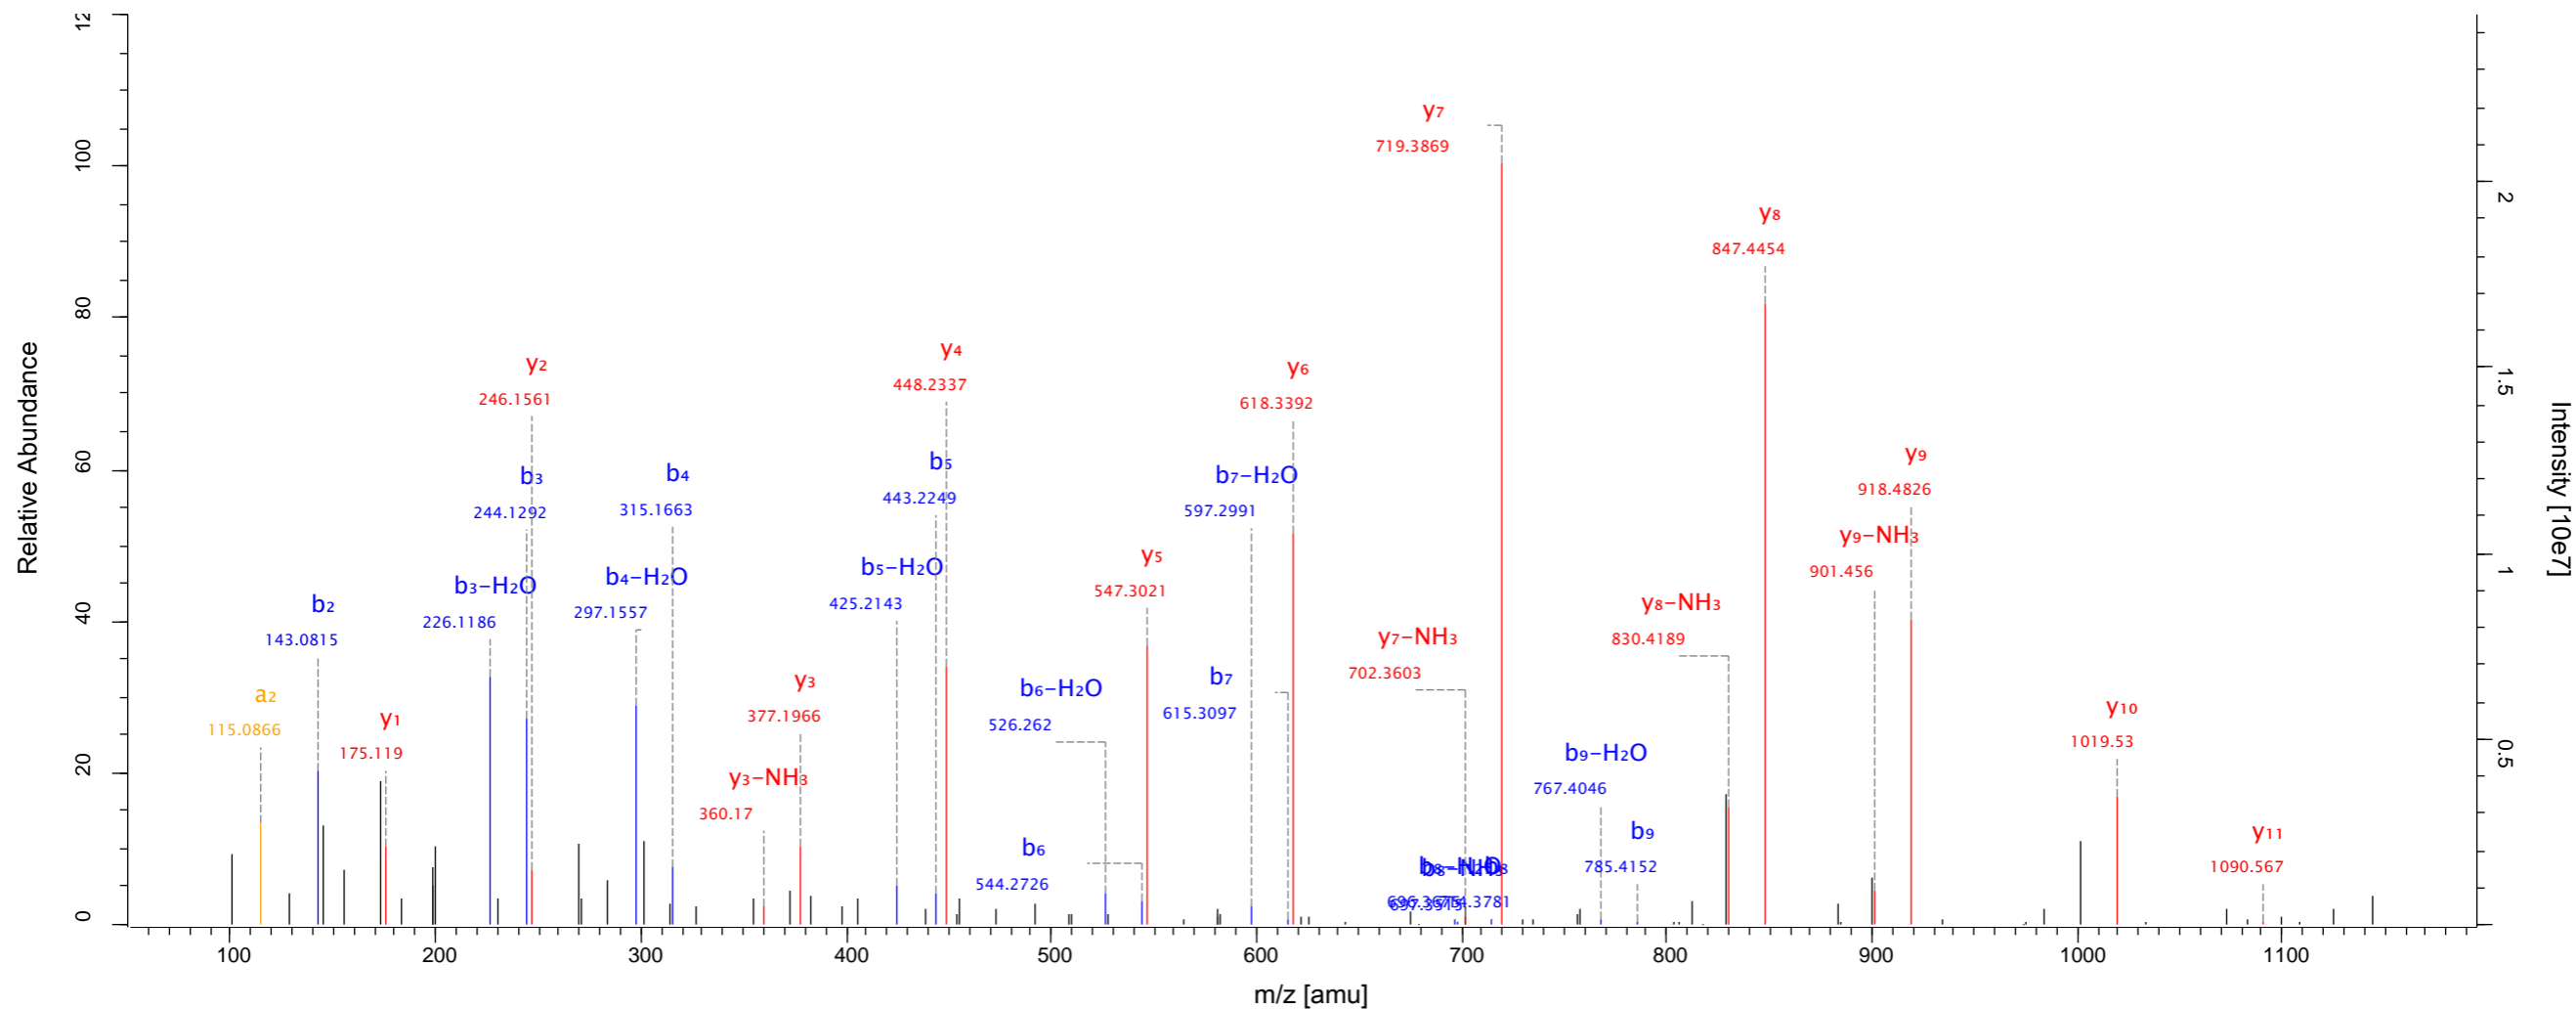

Raw file: 20111212\_EXQ5\_AnMi\_QC\_HCMVp11\_13

Scan number: 16148

Protein: ORFL131W + NC\_006273.2[73147,73947]+ <unknown description>; ORFL131W.iORF1 + NC\_006273.2[73294,73947]+ <unknown description>; ORFL131W.iORF2 + NC\_006273.2[73501,73947]+ <unknown description>

Peptide score: 199.76

Method: FTMS; HCD

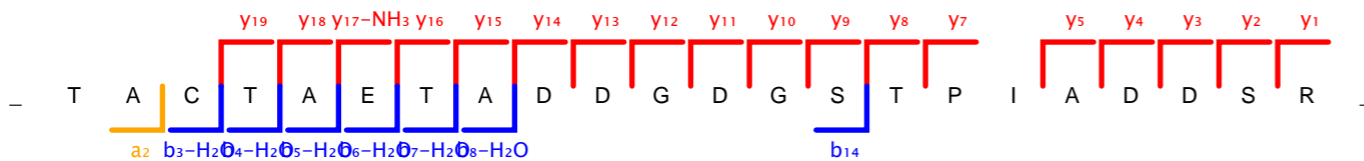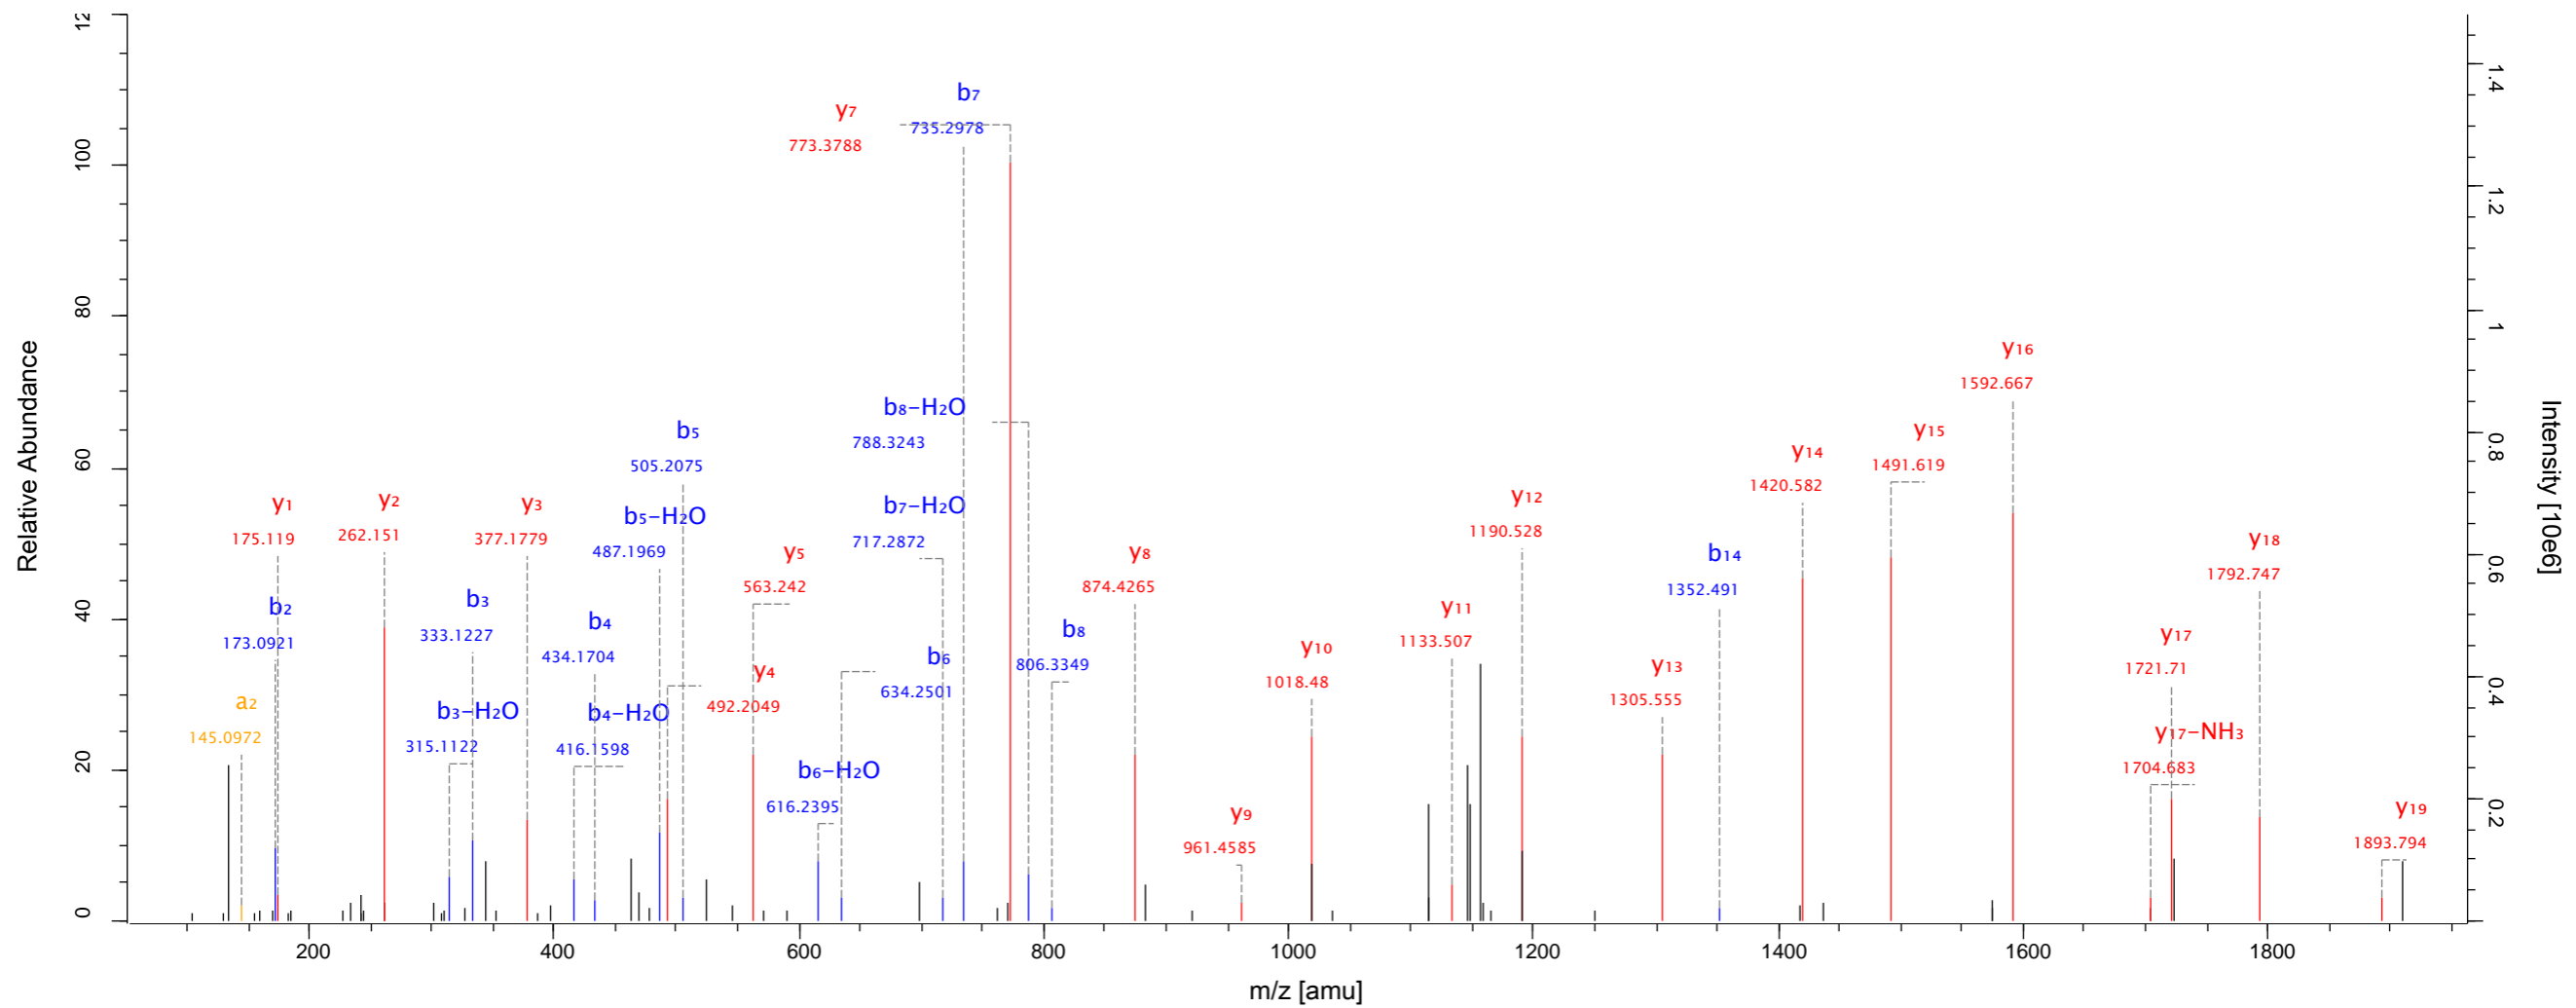



Raw file: 20111212\_EXQ5\_AnMi\_QC\_HCMVp1\_13

Scan number: 19970

Protein: ORFL131W + NC\_006273.2[73147,73947]+ <unknown description>; ORFL131W.iORF1 + NC\_006273.2[73294,73947]+ <unknown description>; ORFL131W.iORF2 + NC\_006273.2[73501,73947]+ <unknown description>

Peptide score: 192.47

Method: FTMS; HCD

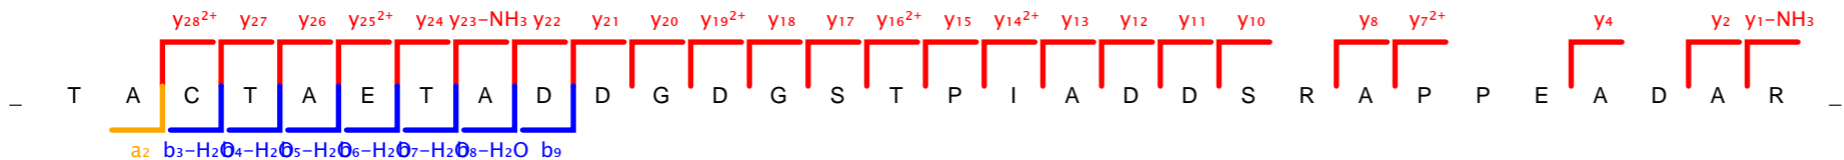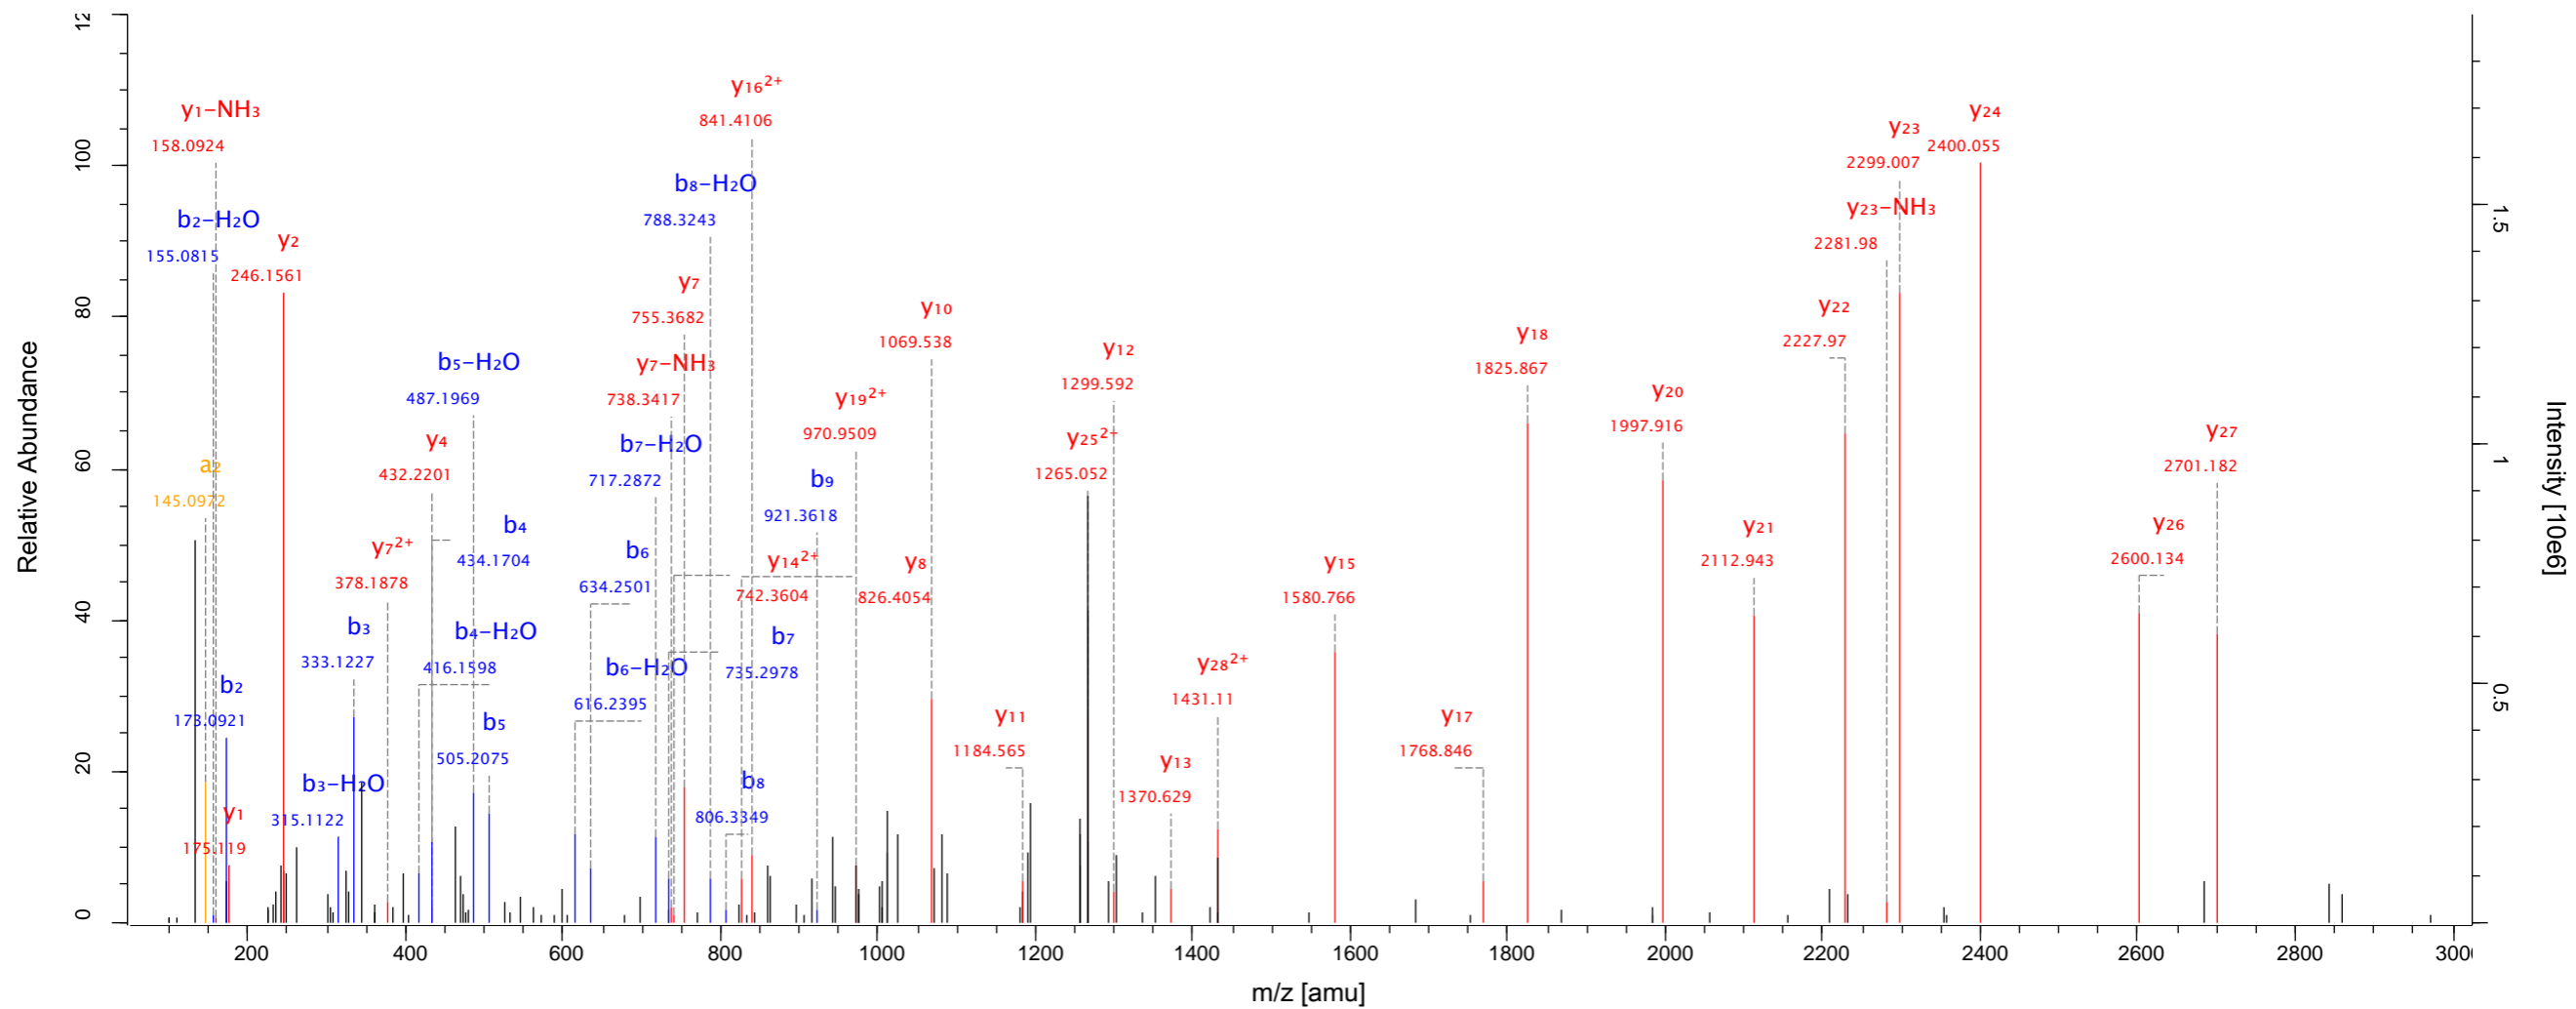

Raw file: 20111212\_EXQ5\_AnMi\_QC\_HCMVpl1\_13

Scan number: 24694

Protein: ORFL131W + NC\_006273.2[73147,73947]+ <unknown description>; ORFL131W.iORF1 + NC\_006273.2[73294,73947]+ <unknown description>; ORFL131W.iORF2 + NC\_006273.2[73501,73947]+ <unknown description>

Peptide score: 213.34

Method: FTMS; HCD

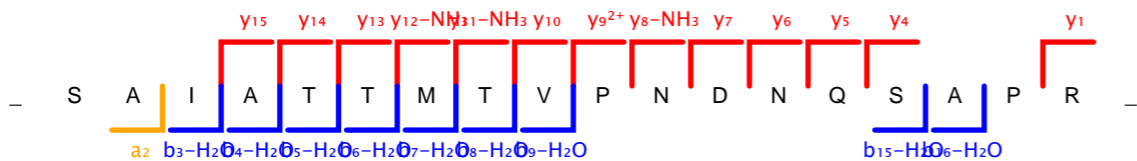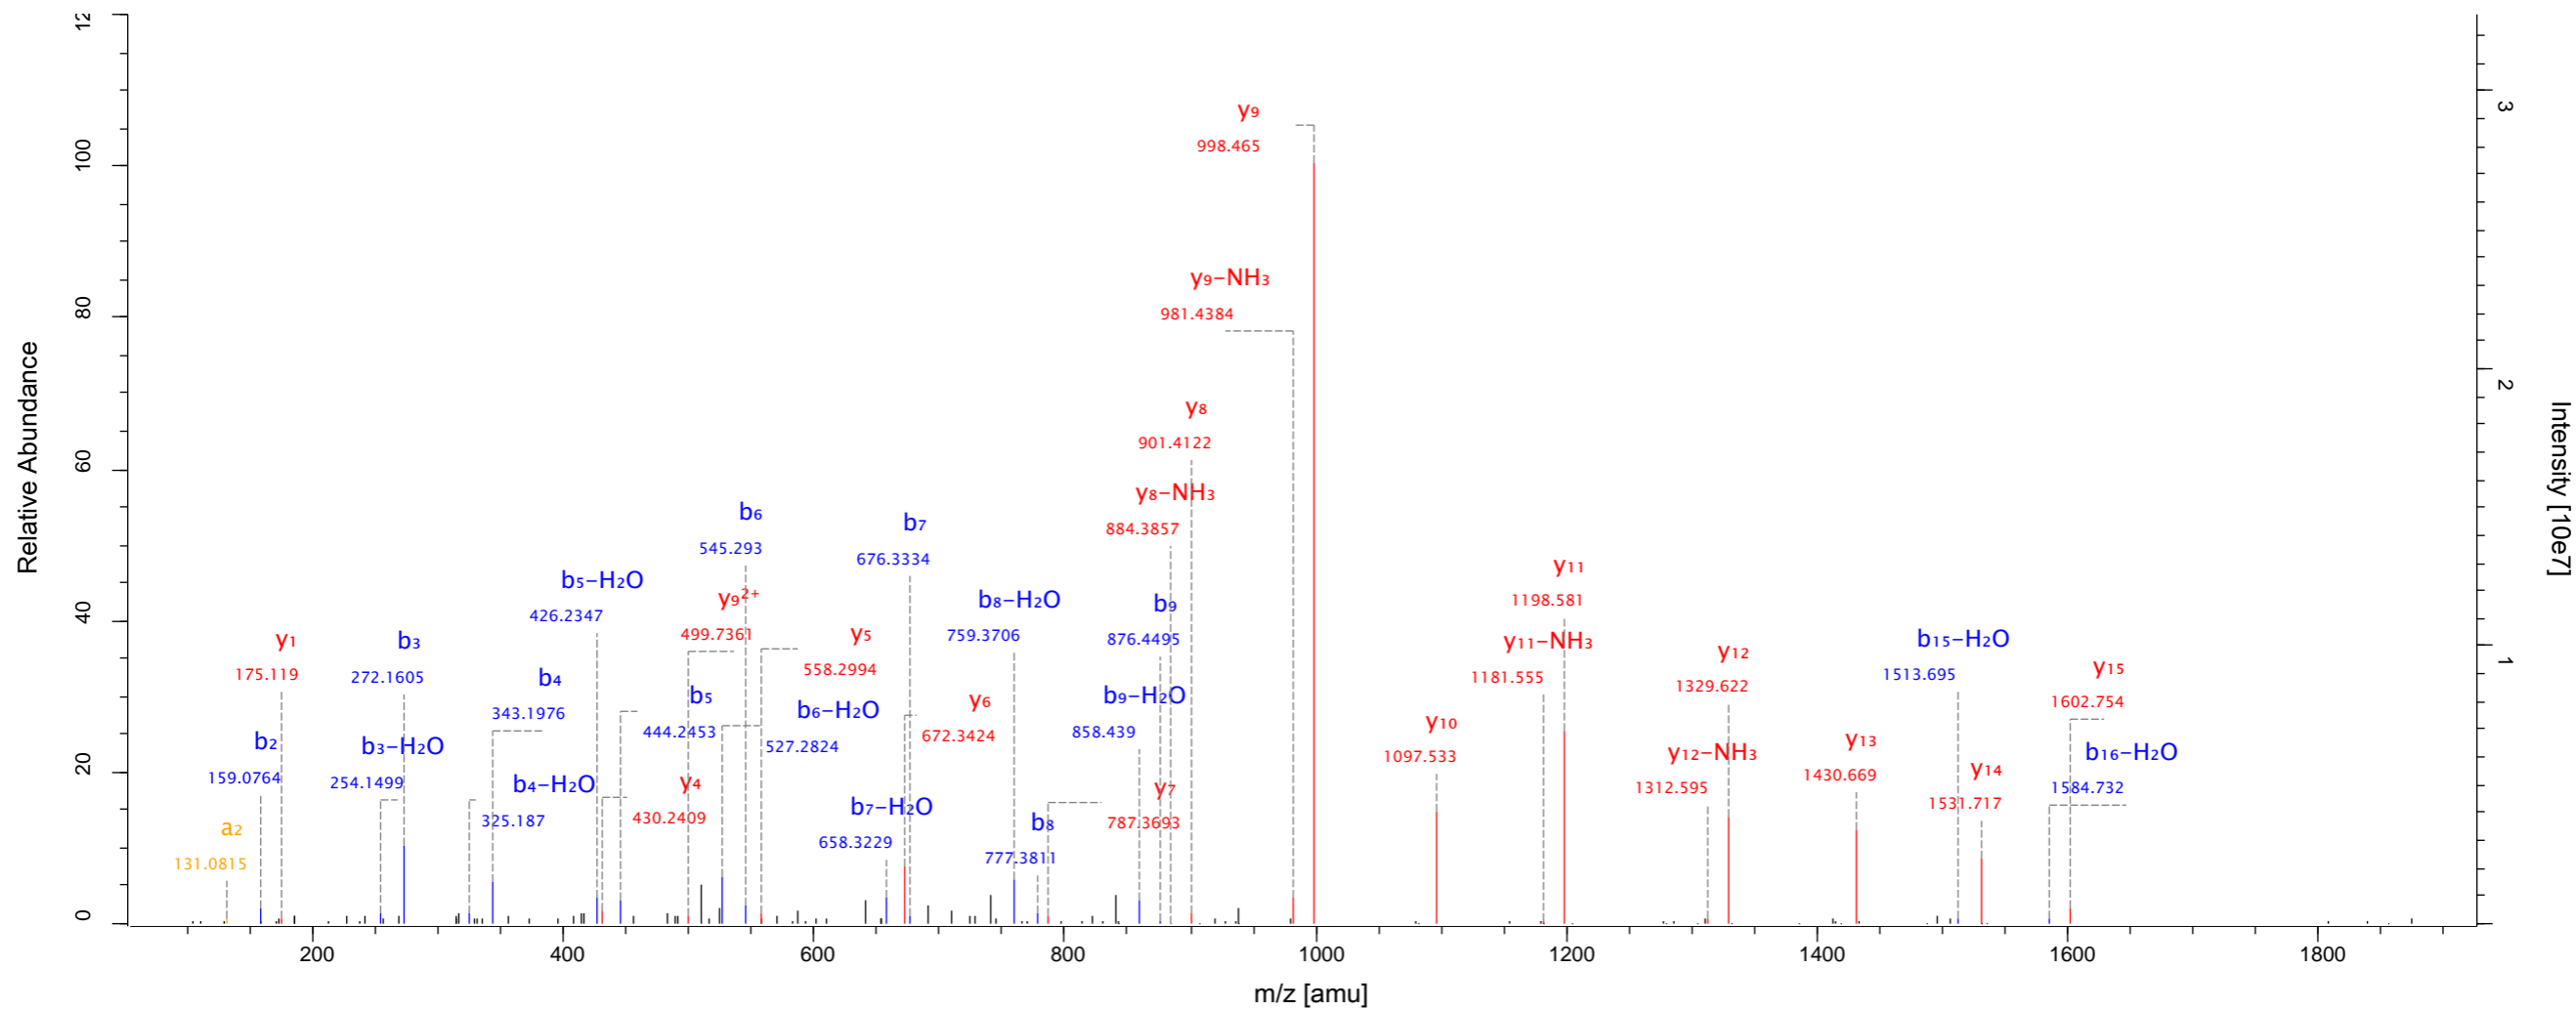

Raw file: 20111212\_EXQ5\_AnMi\_QC\_HCMVp1\_13

Scan number: 37446

Protein: ORFL131W + NC\_006273.2[73147,73947]+ <unknown description>; ORFL131W.iORF1 + NC\_006273.2[73294,73947]+ <unknown description>; ORFL131W.iORF2 + NC\_006273.2[73501,73947]+ <unknown description>

Peptide score: 129.23

Method: FTMS; HCD

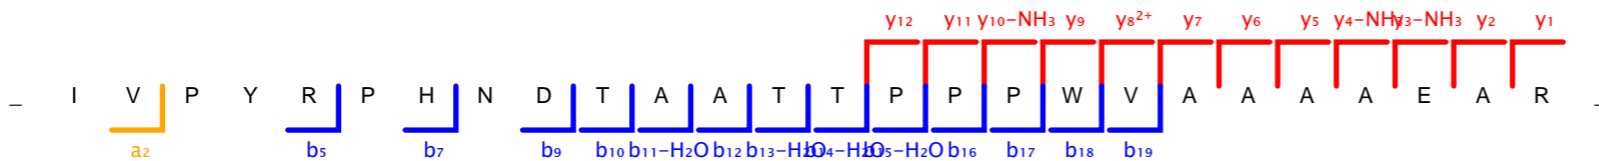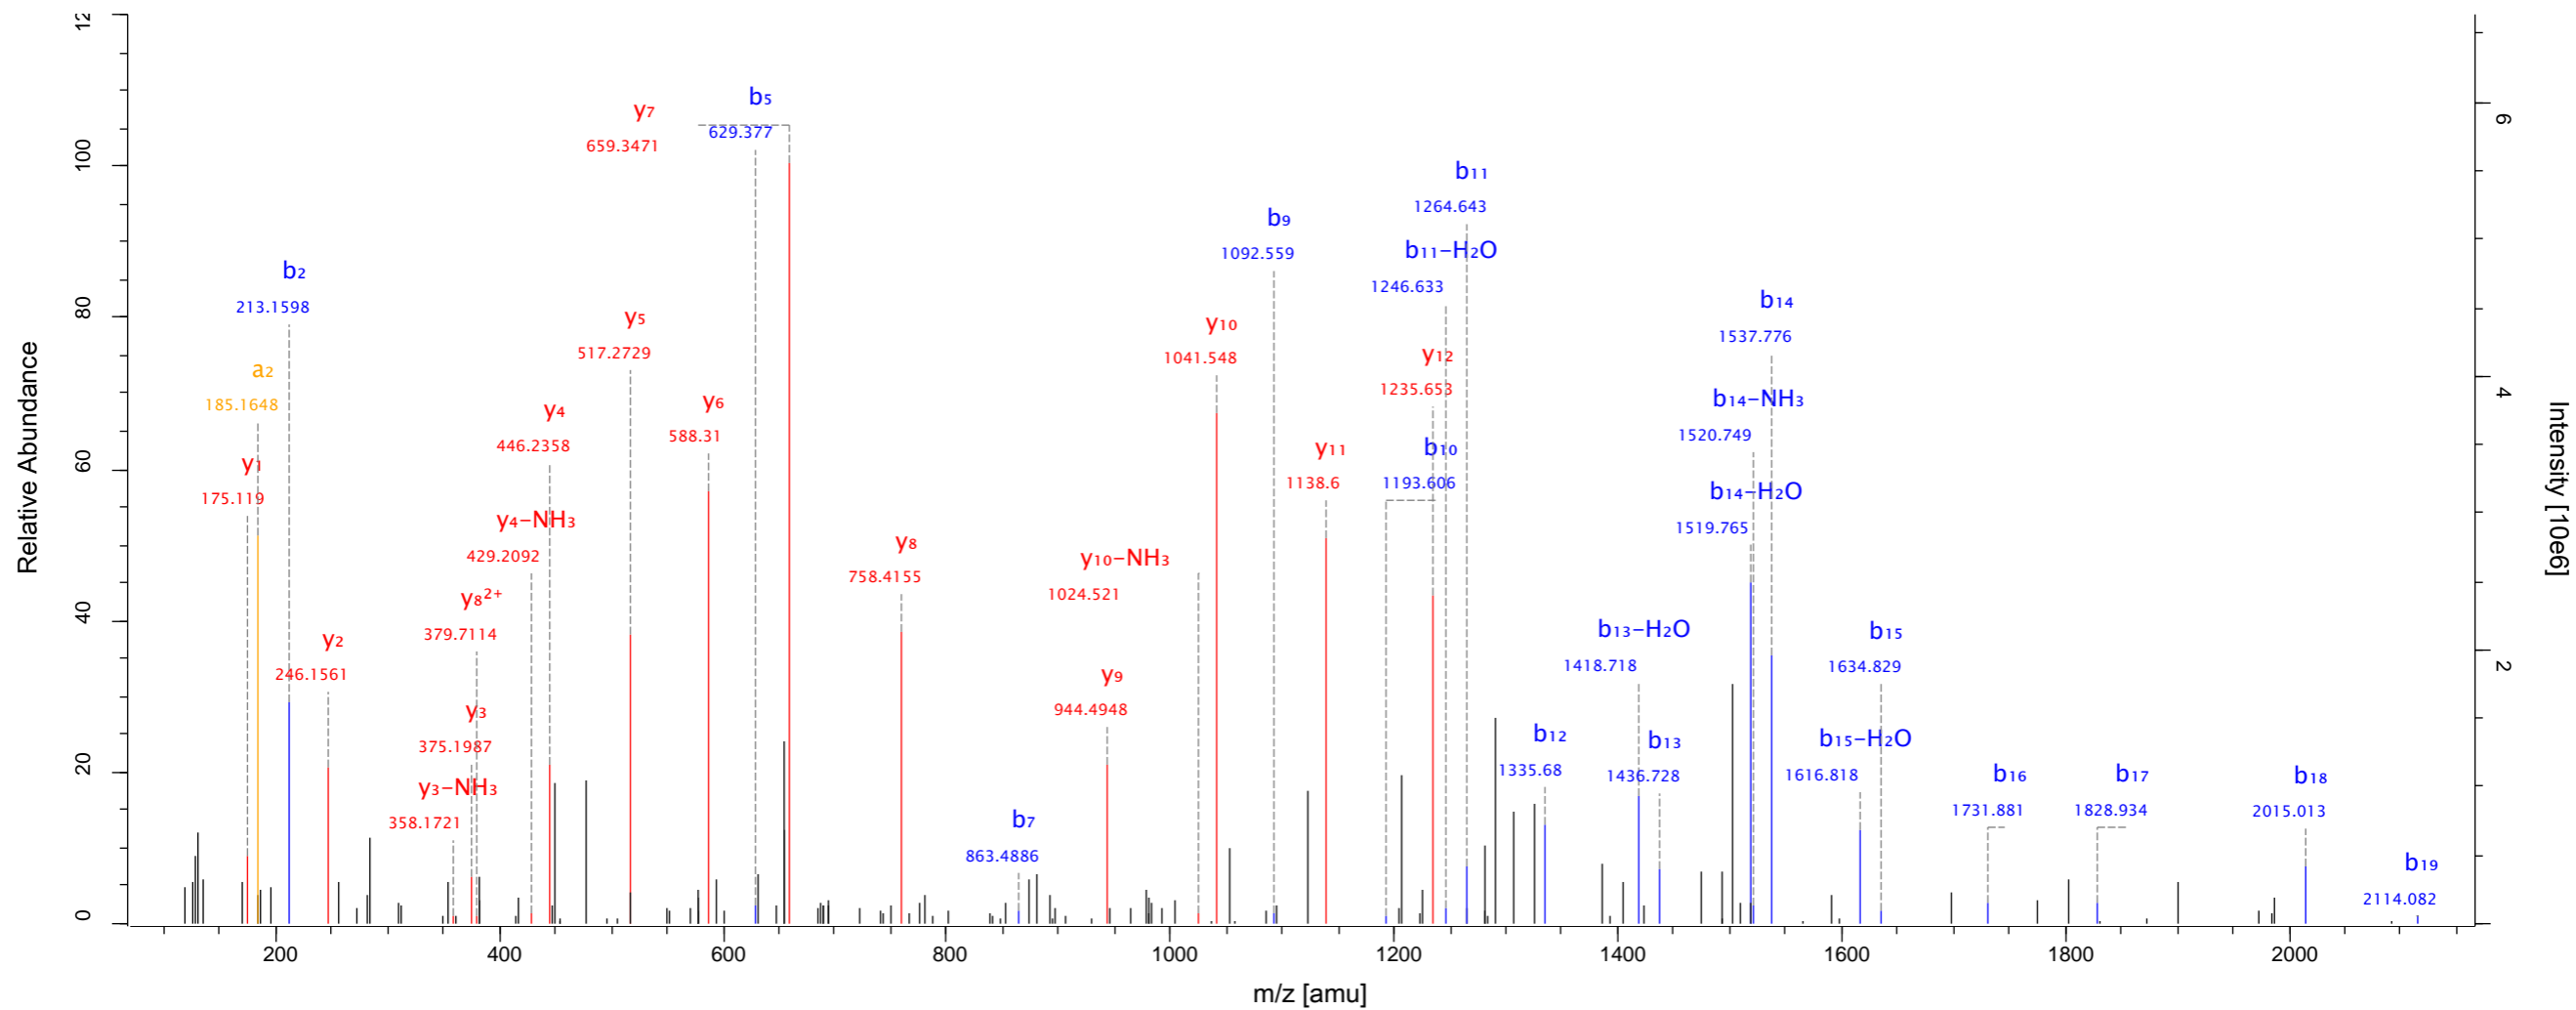

Raw file: 20111212\_EXQ5\_AnMi\_QC\_HCMVp1\_13  
 Scan number: 51068  
 Protein: ORFL131W + NC\_006273.2[73147,73947]+ <unknown description>; ORFL131W.iORF1 + NC\_006273.2[73294,73947]+ <unknown description>  
 Peptide score: 111.39  
 Method: FTMS; HCD

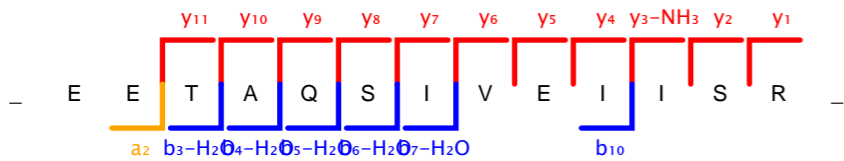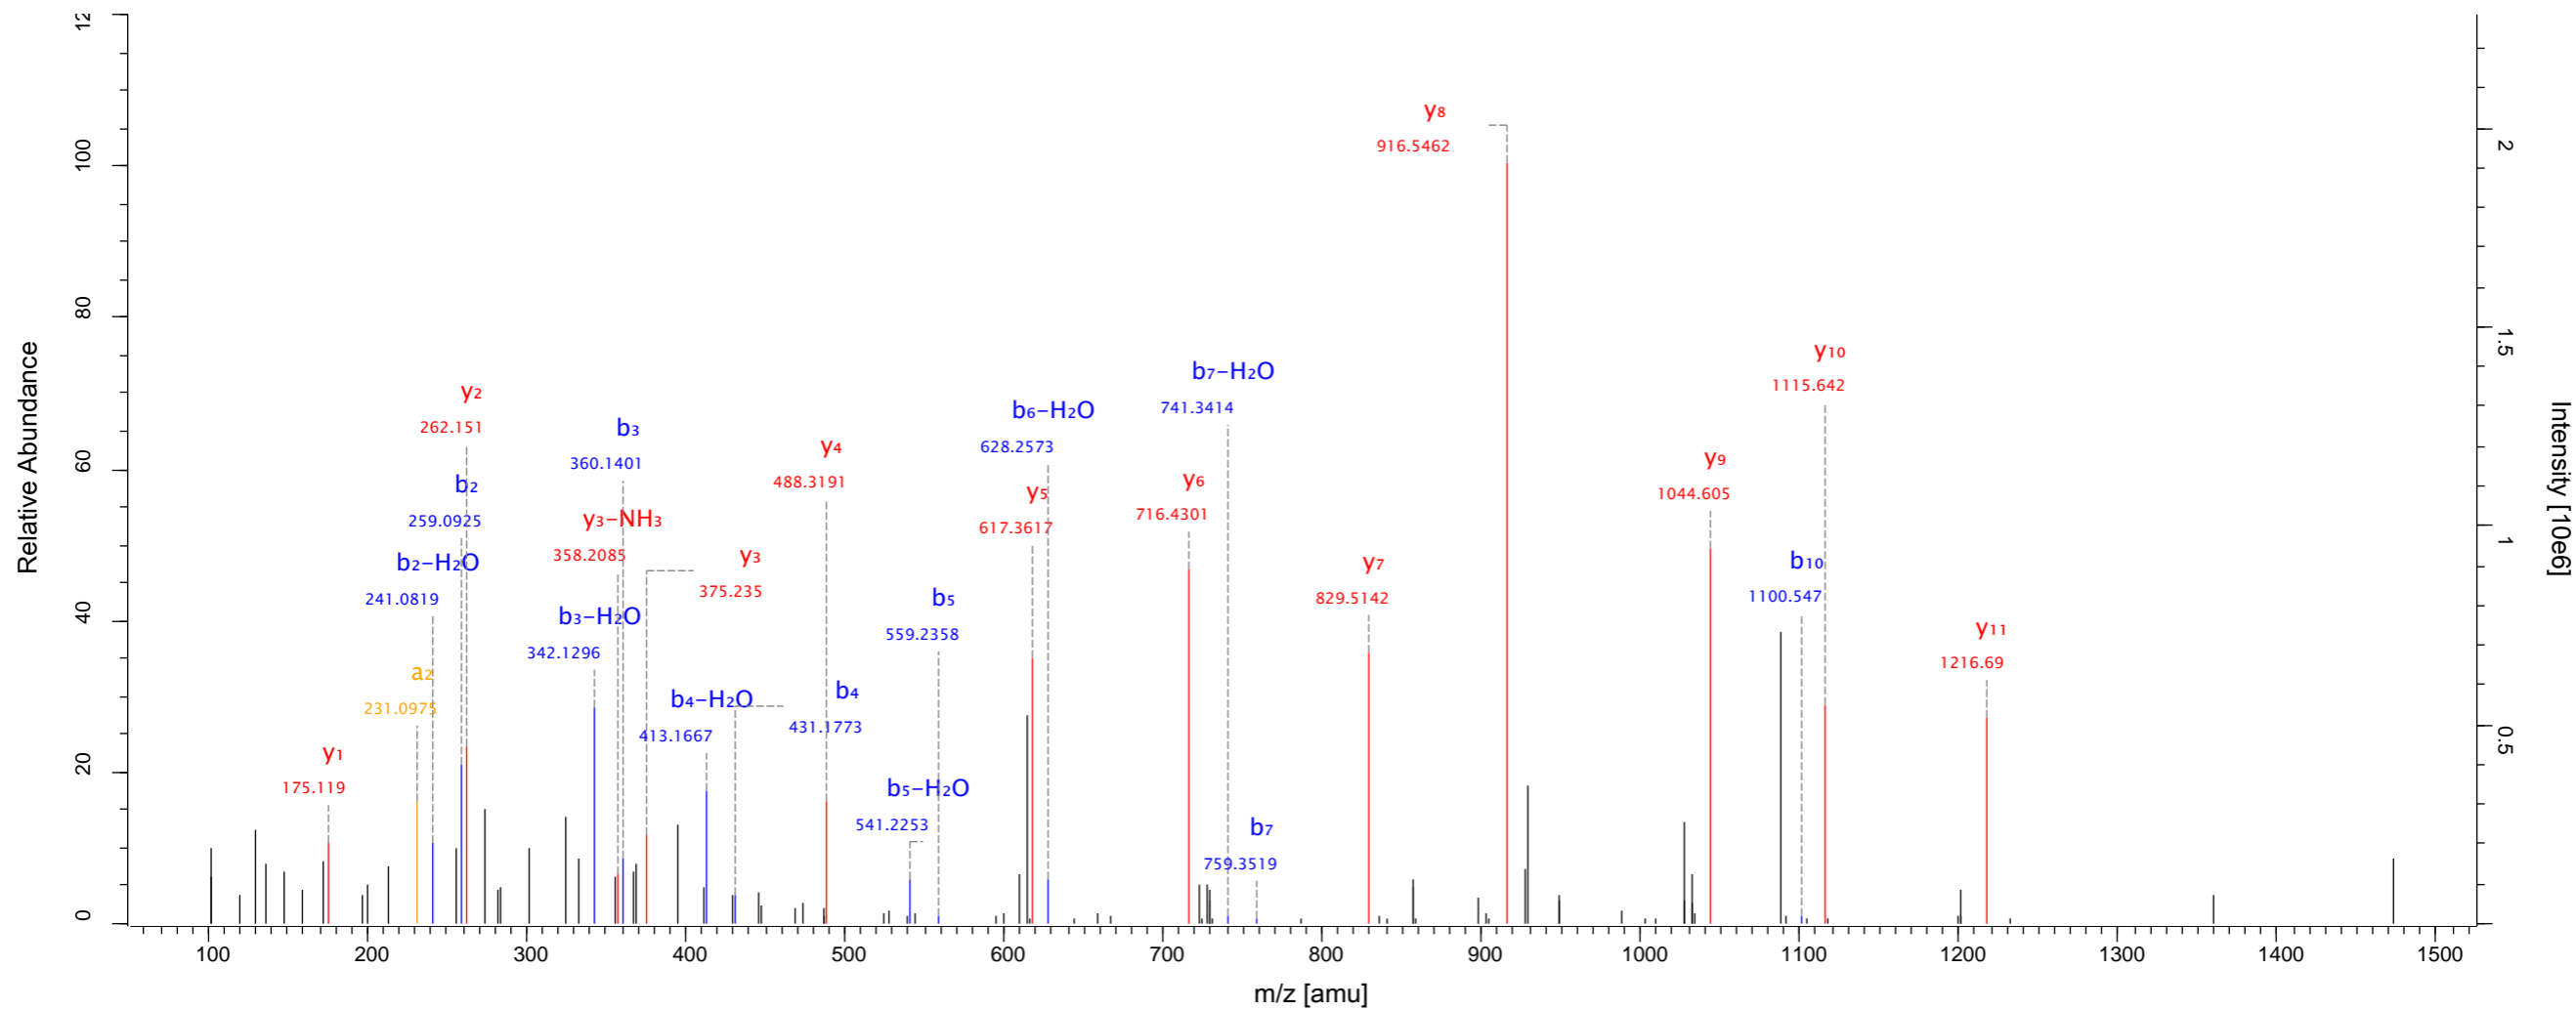

Raw file: 20111212\_EXQ5\_AnMi\_QC\_HCMVp1\_13

Scan number: 57325

Protein: ORFL131W + NC\_006273.2[73147,73947]+ <unknown description>; ORFL131W.iORF1 + NC\_006273.2[73294,73947]+ <unknown description>; ORFL131W.iORF2 + NC\_006273.2[73501,73947]+ <unknown description>

Peptide score: 84.57

Method: FTMS; HCD

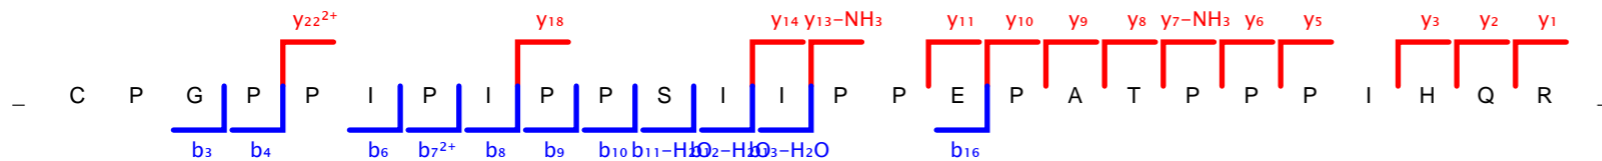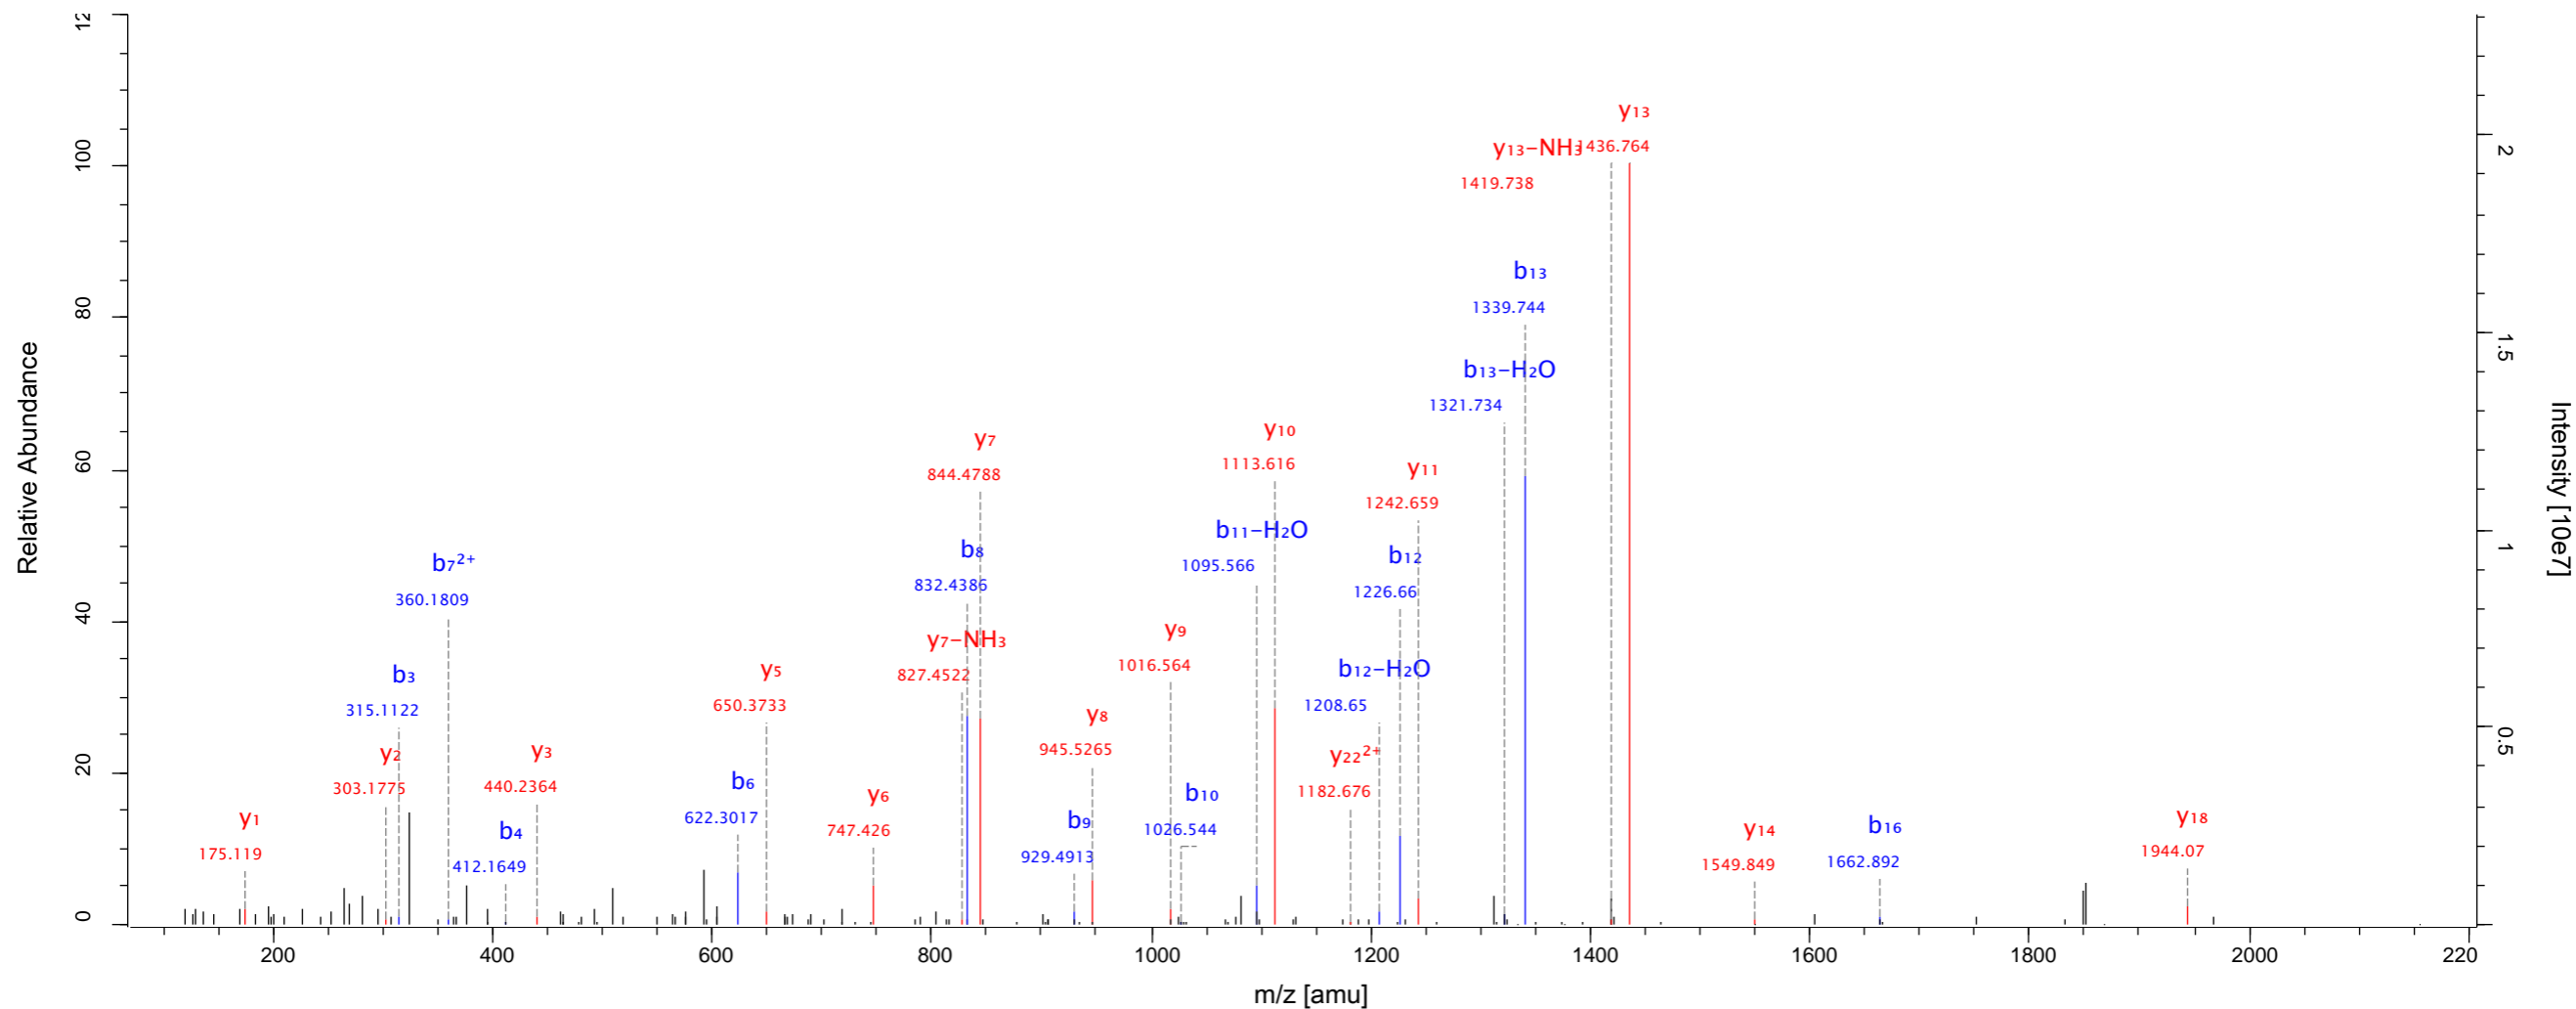

Raw file: 20111212\_EXQ5\_AnMi\_QC\_HCMVp11\_13  
Scan number: 8060  
Protein: ORFL131W + NC\_006273.2[73147,73947]+ <unknown description>; ORFL131W.iORF1 + NC\_006273.2[73294,73947]+ <unknown description>  
Peptide score: 92.54  
Method: FTMS; HCD

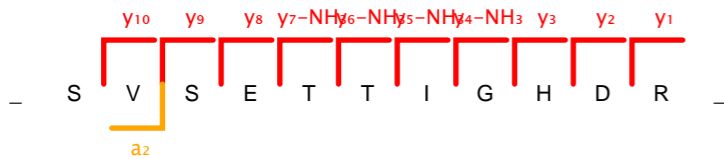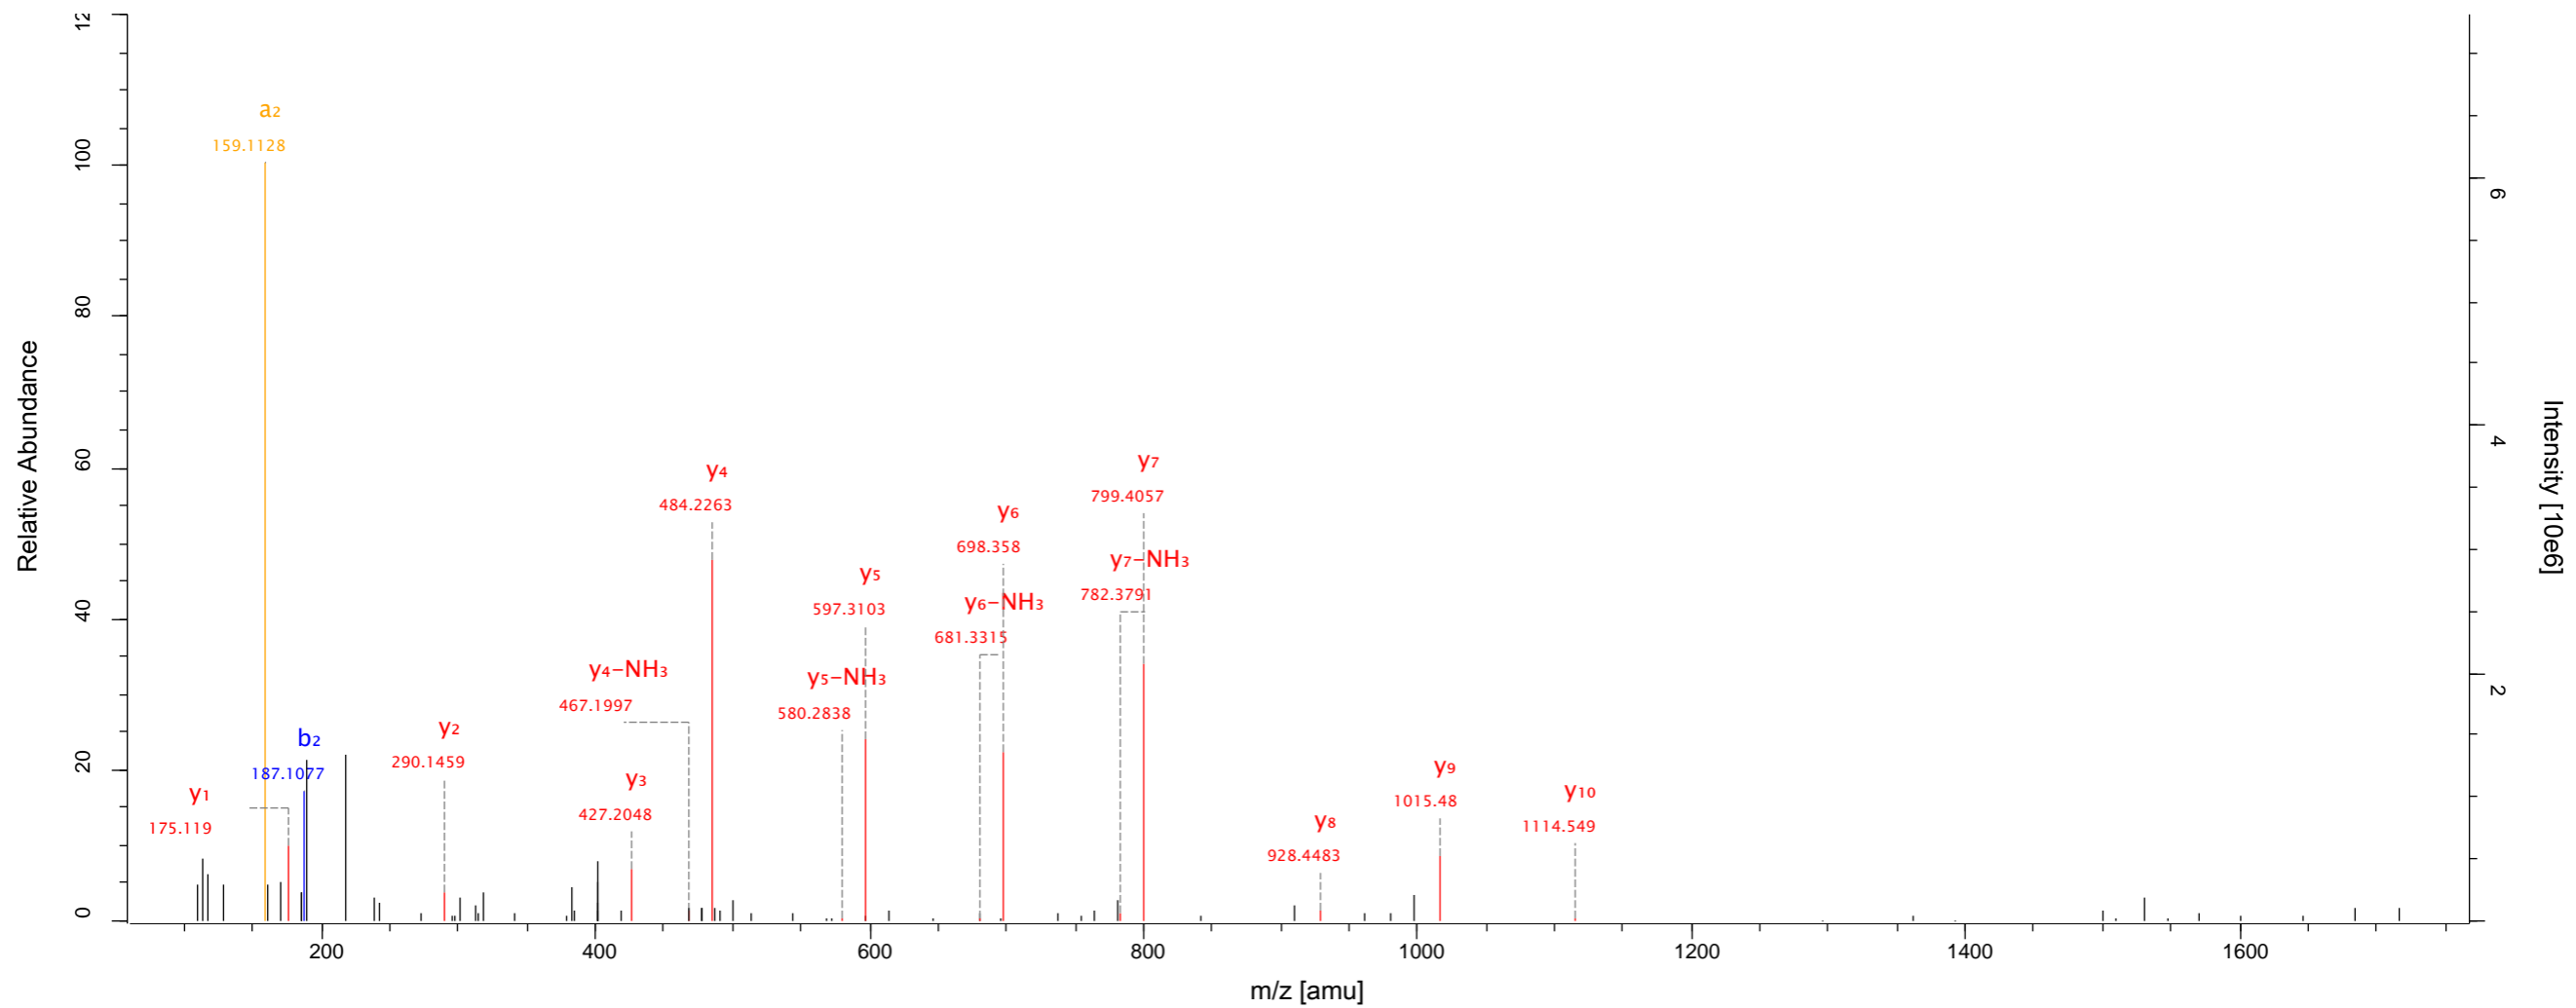

Raw file: 20111212\_EXQ5\_AnMi\_QC\_HCMVpl1\_5  
 Scan number: 14960  
 Protein: ORFL131W + NC\_006273.2[73147,73947]+ <unknown description>; ORFL131W.iORF1 + NC\_006273.2[73294,73947]+ <unknown description>  
 Peptide score: 252.51  
 Method: FTMS; HCD

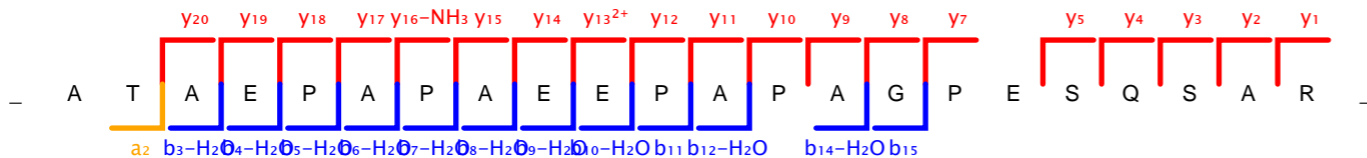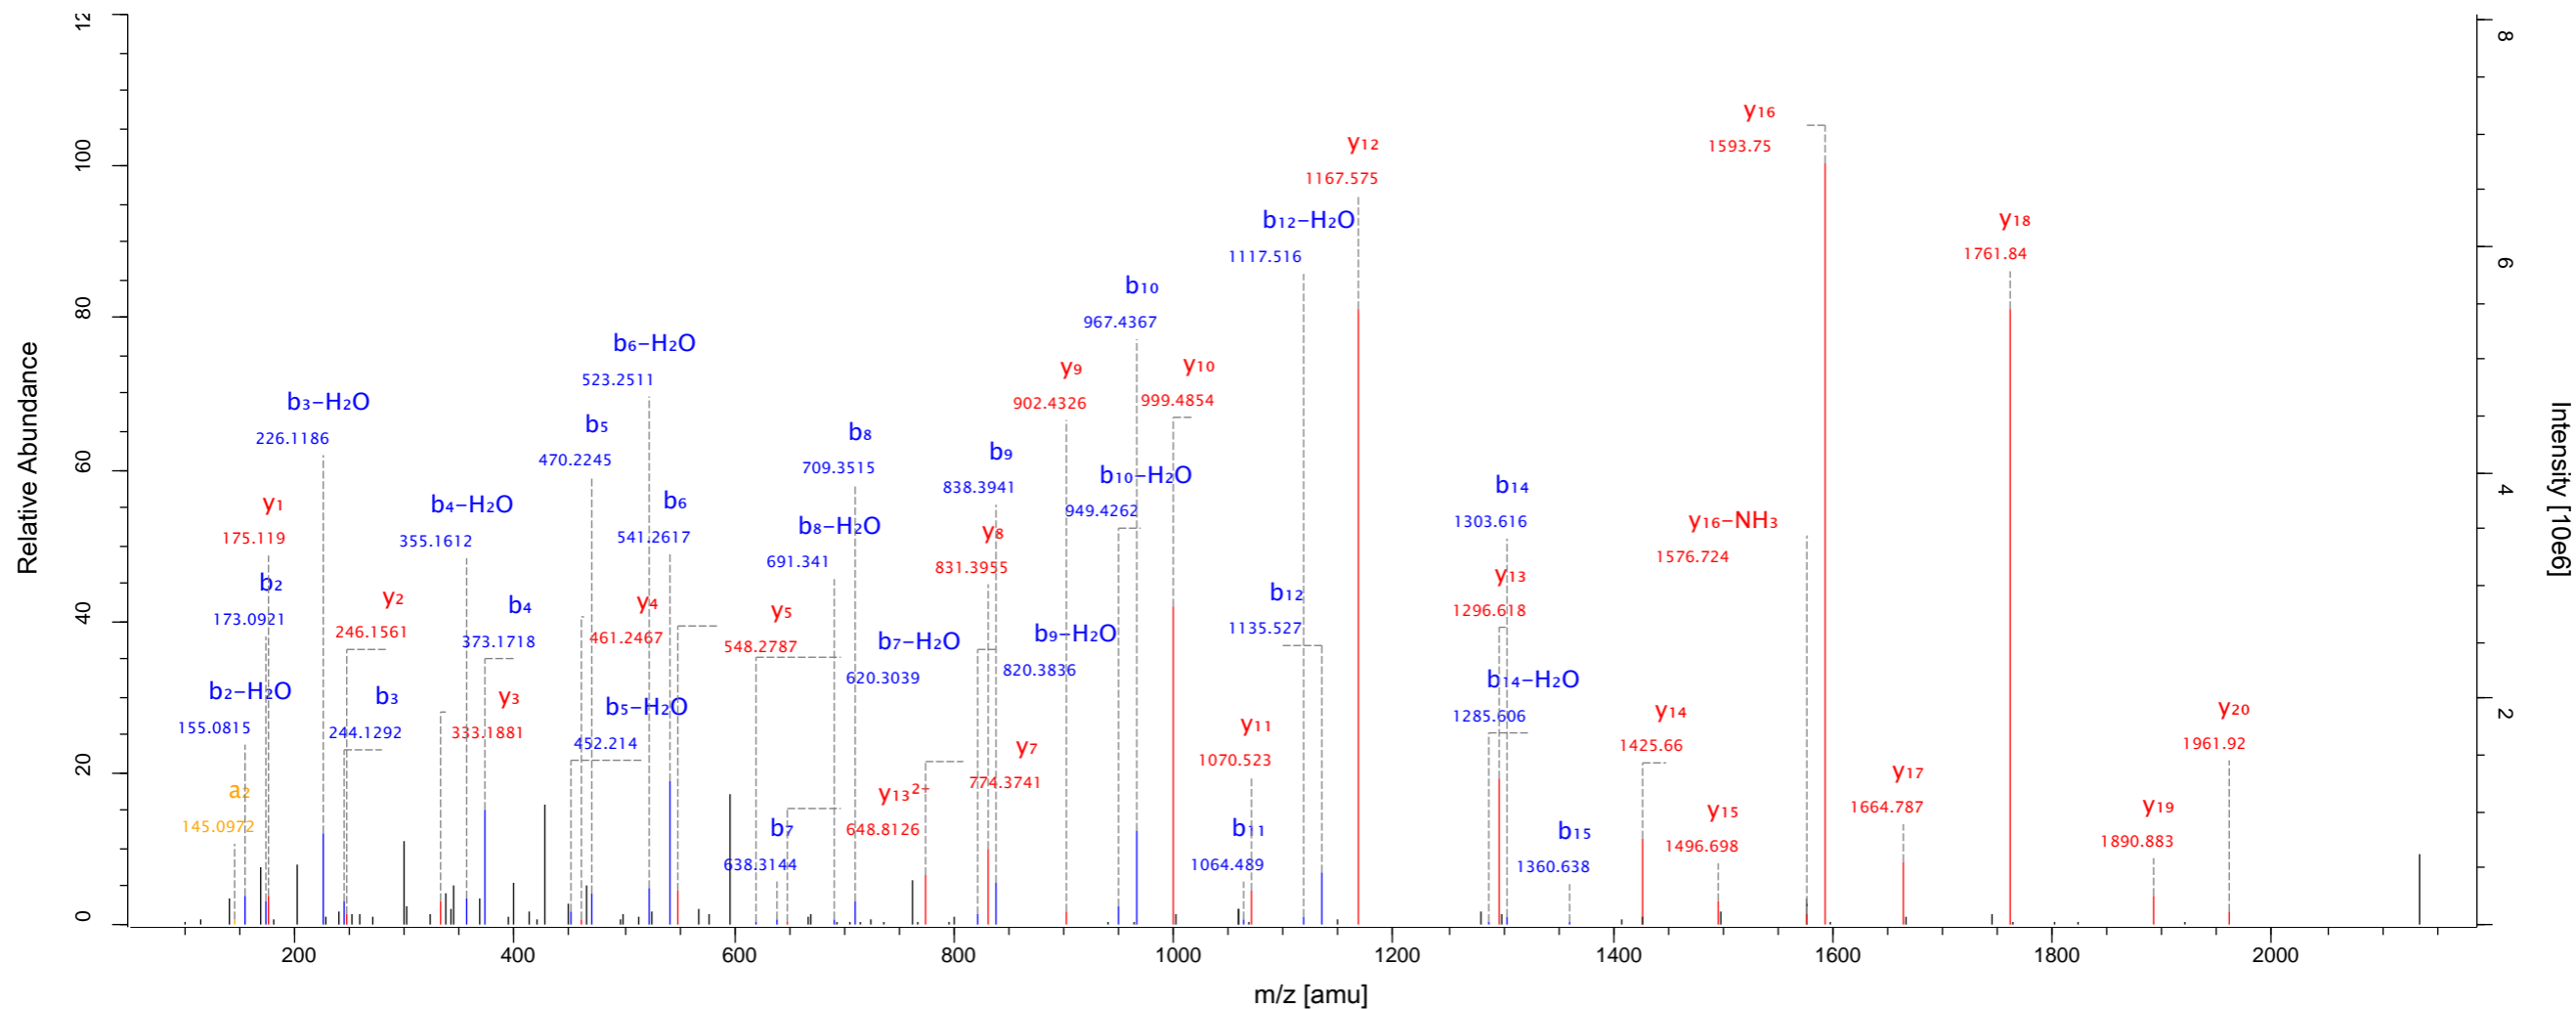

Raw file: 20111212\_EXQ5\_AnMi\_QC\_HCMVp1\_5

Scan number: 42435

Protein: ORFL131W + NC\_006273.2[73147,73947]+ <unknown description>; ORFL131W.iORF1 + NC\_006273.2[73294,73947]+ <unknown description>; ORFL131W.iORF2 + NC\_006273.2[73501,73947]+ <unknown description>

Peptide score: 67.9

Method: FTMS; HCD

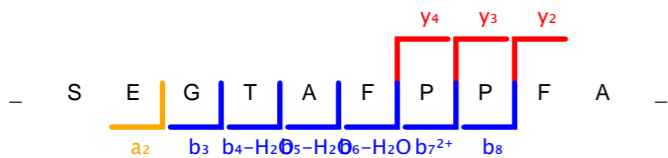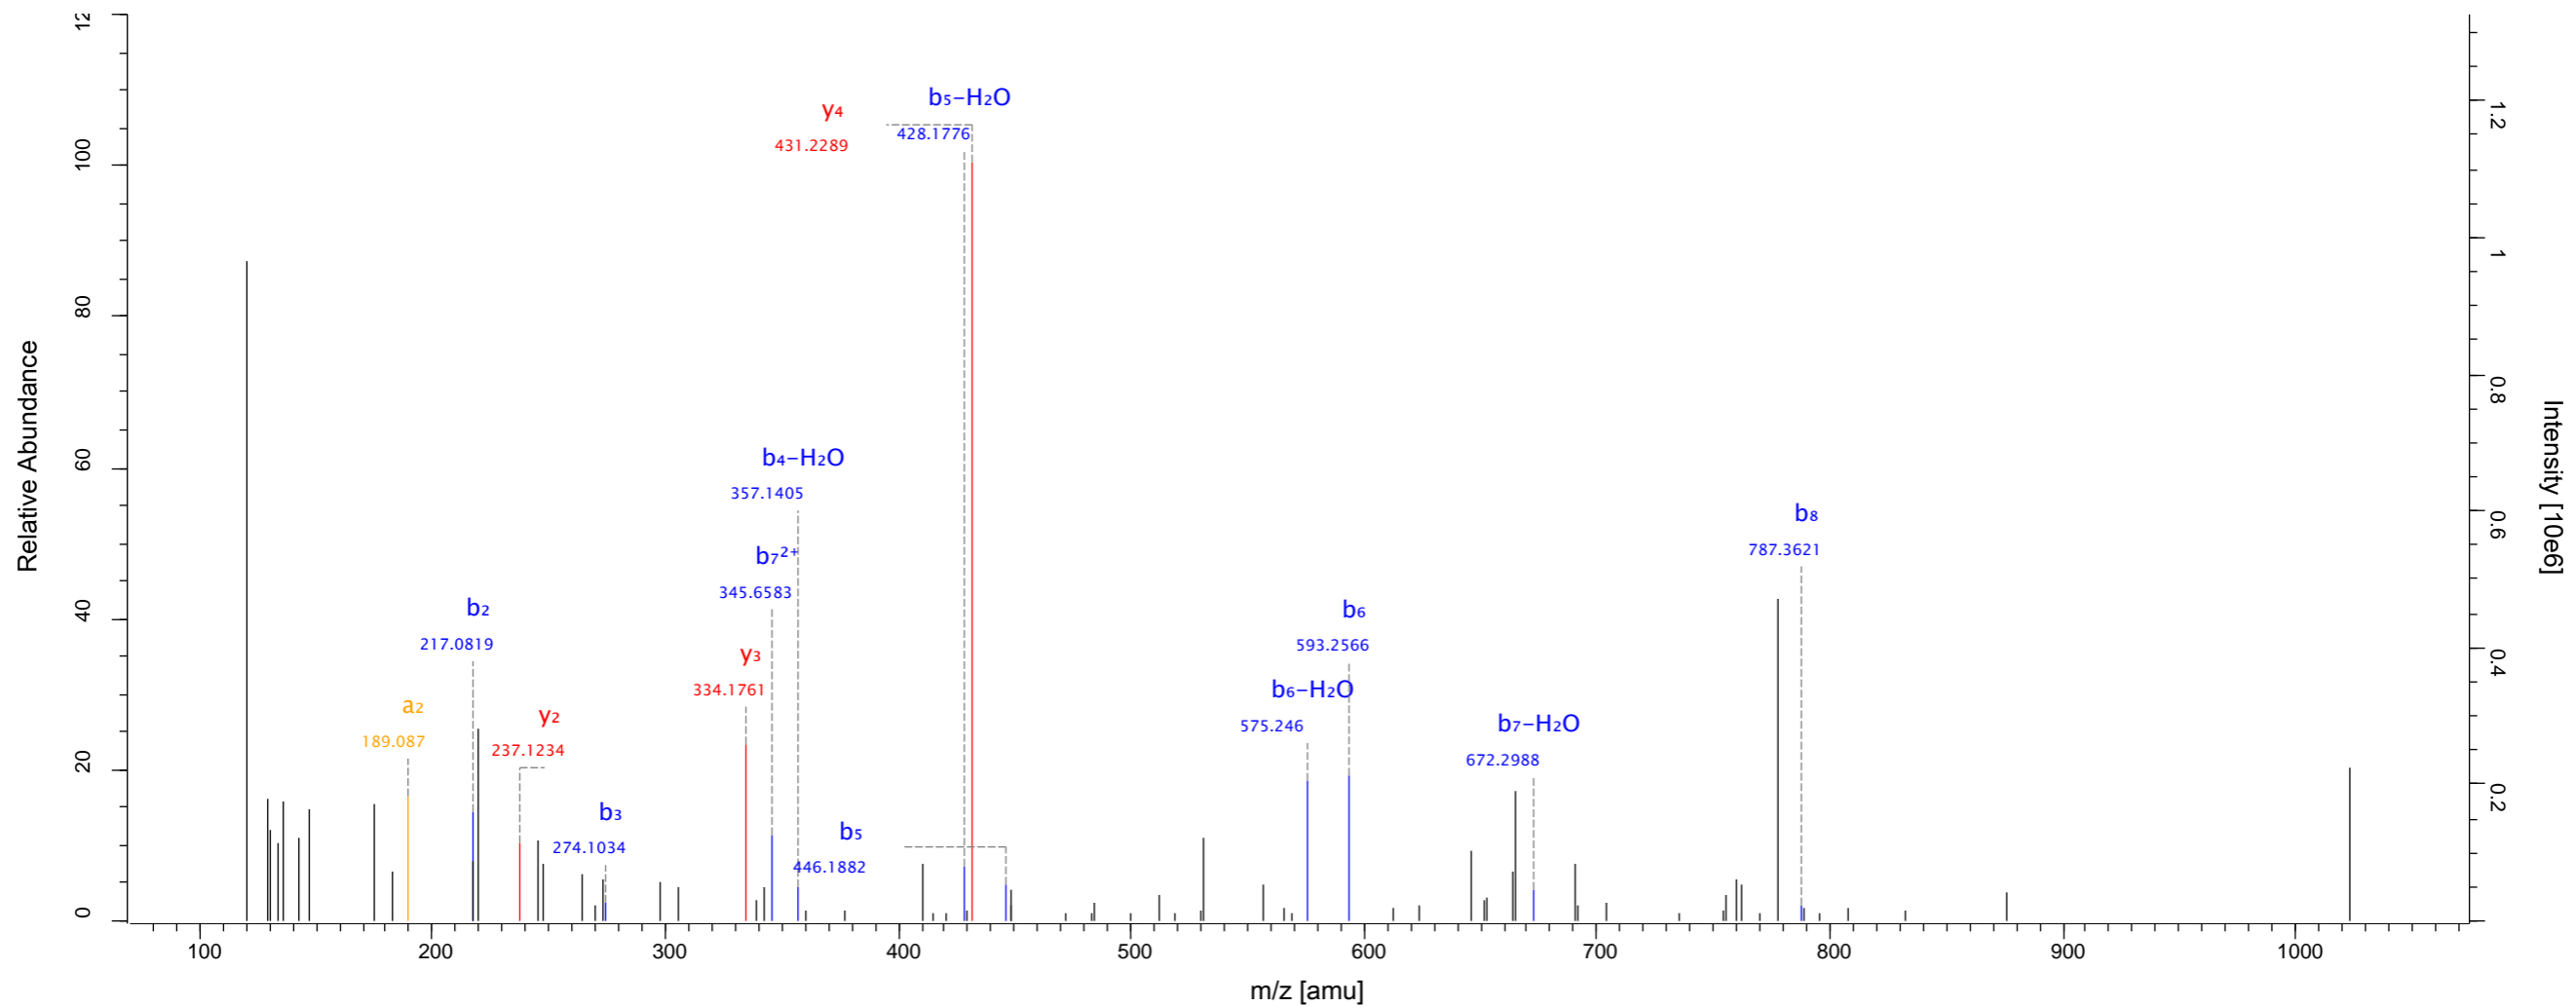



Raw file: 20111212\_EXQ5\_AnMi\_QC\_HCMVp11\_25  
Scan number: 27270  
Protein: ORFS366W + NC\_006273.2[227254,227469]+ <unknown description>  
Peptide score: 174.84  
Method: FTMS; HCD

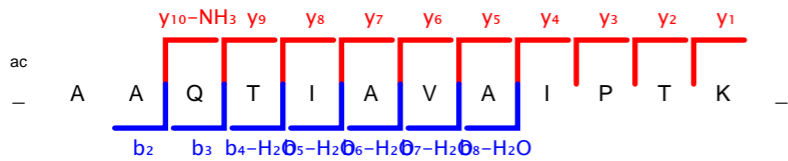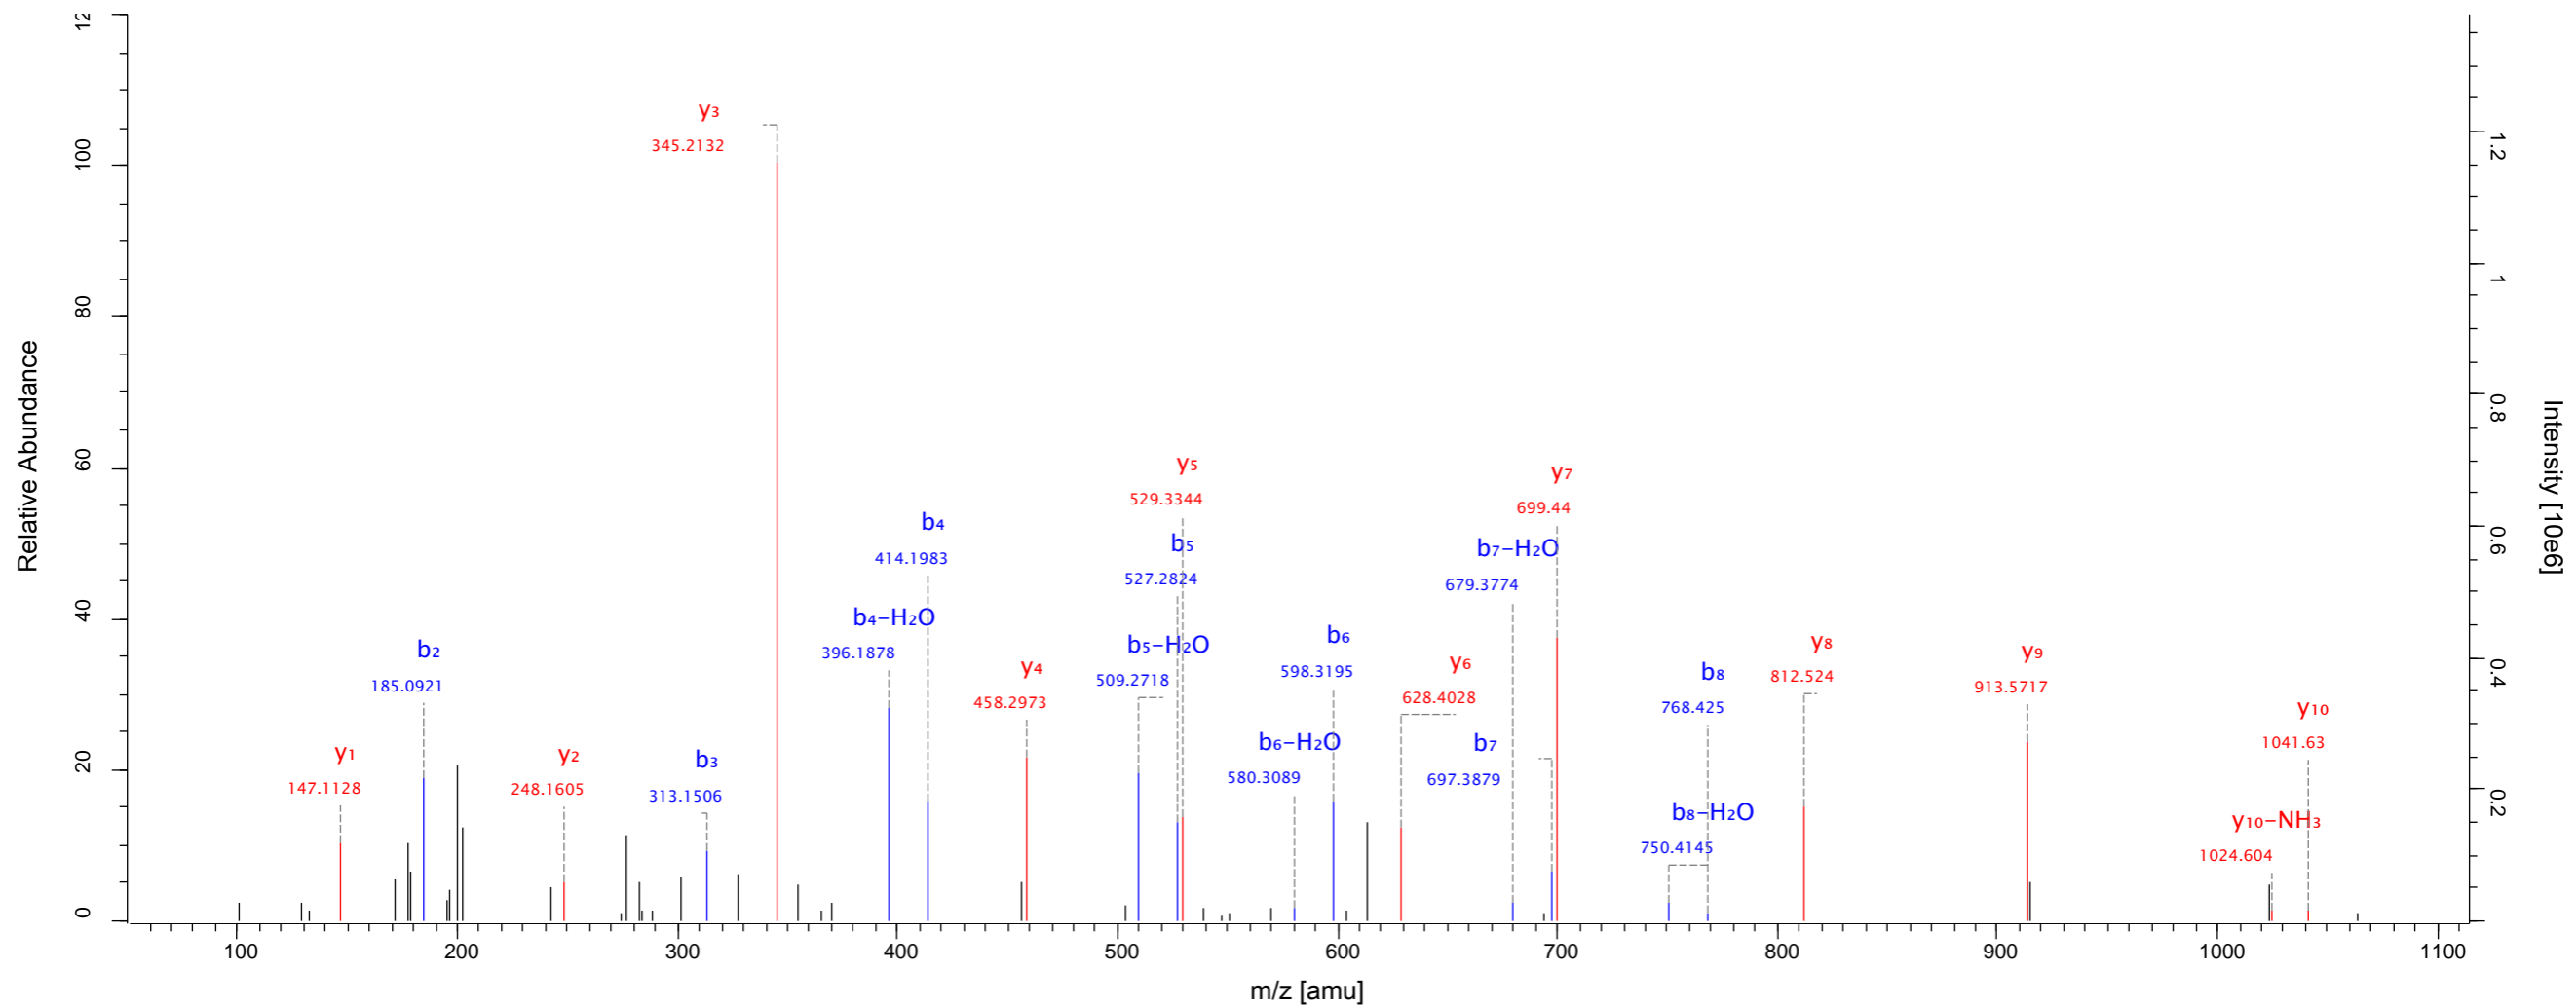

Raw file: 20111212\_EXQ5\_AnMi\_QC\_HCMVp1\_26  
Scan number: 10081  
Protein: ORFL121C - NC\_006273.2[65579,65851]- <unknown description>  
Peptide score: 136.11  
Method: FTMS; HCD

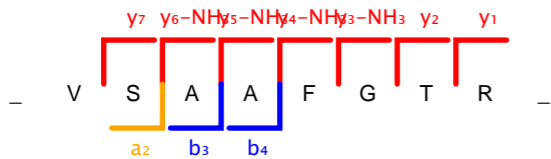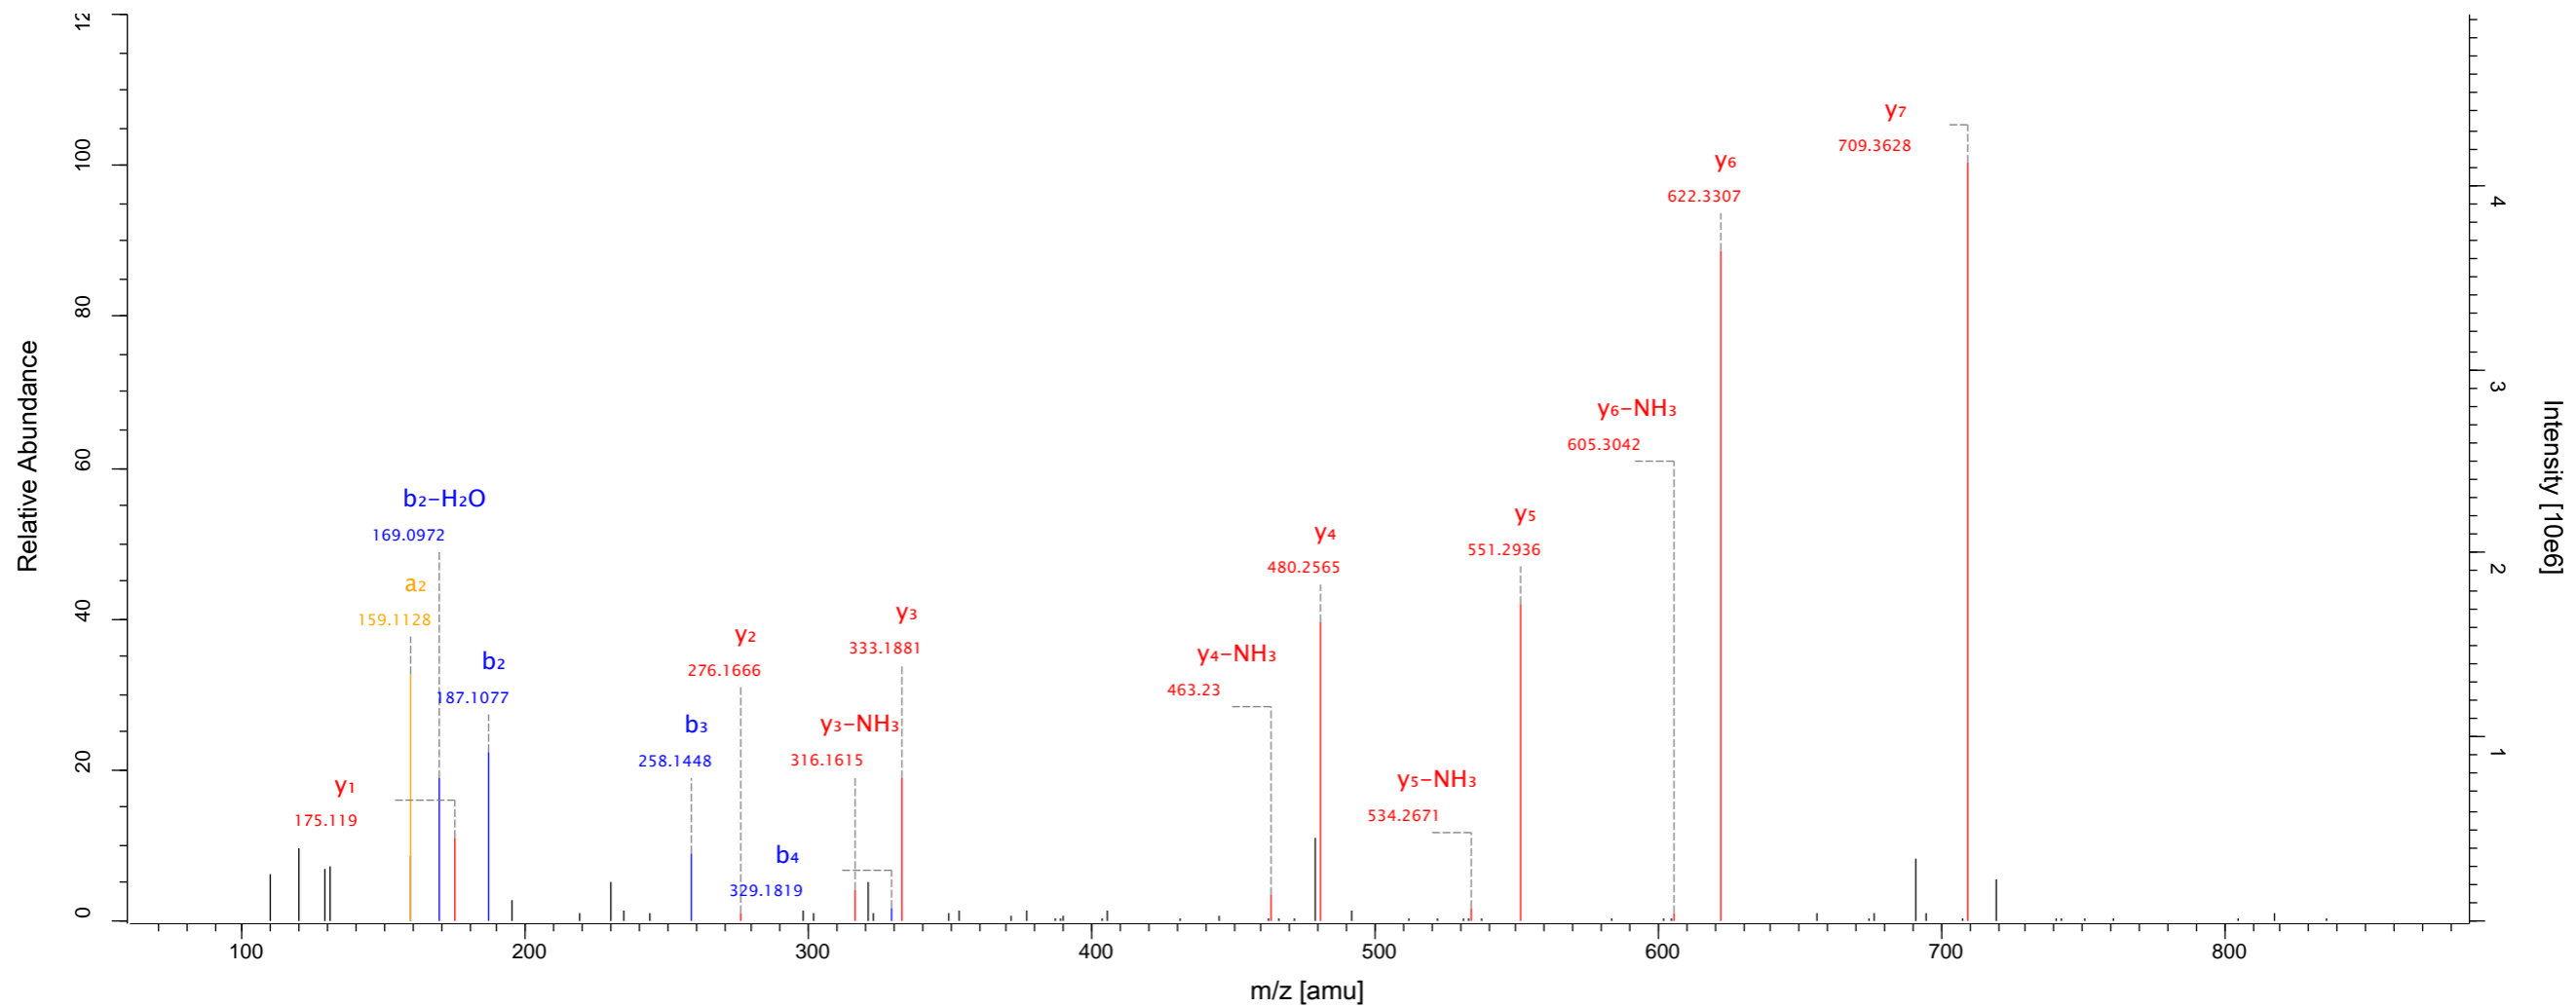

Raw file: 20111212\_EXQ5\_AnMi\_QC\_HCMVp1\_26  
Scan number: 10537  
Protein: ORFL137W.iORF1 + NC\_006273.2[75299,75529]+ <unknown description>  
Peptide score: 56.01  
Method: FTMS; HCD

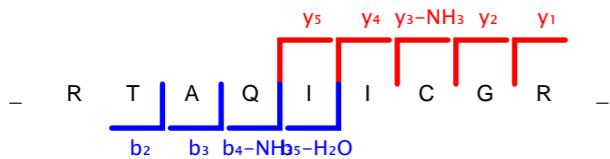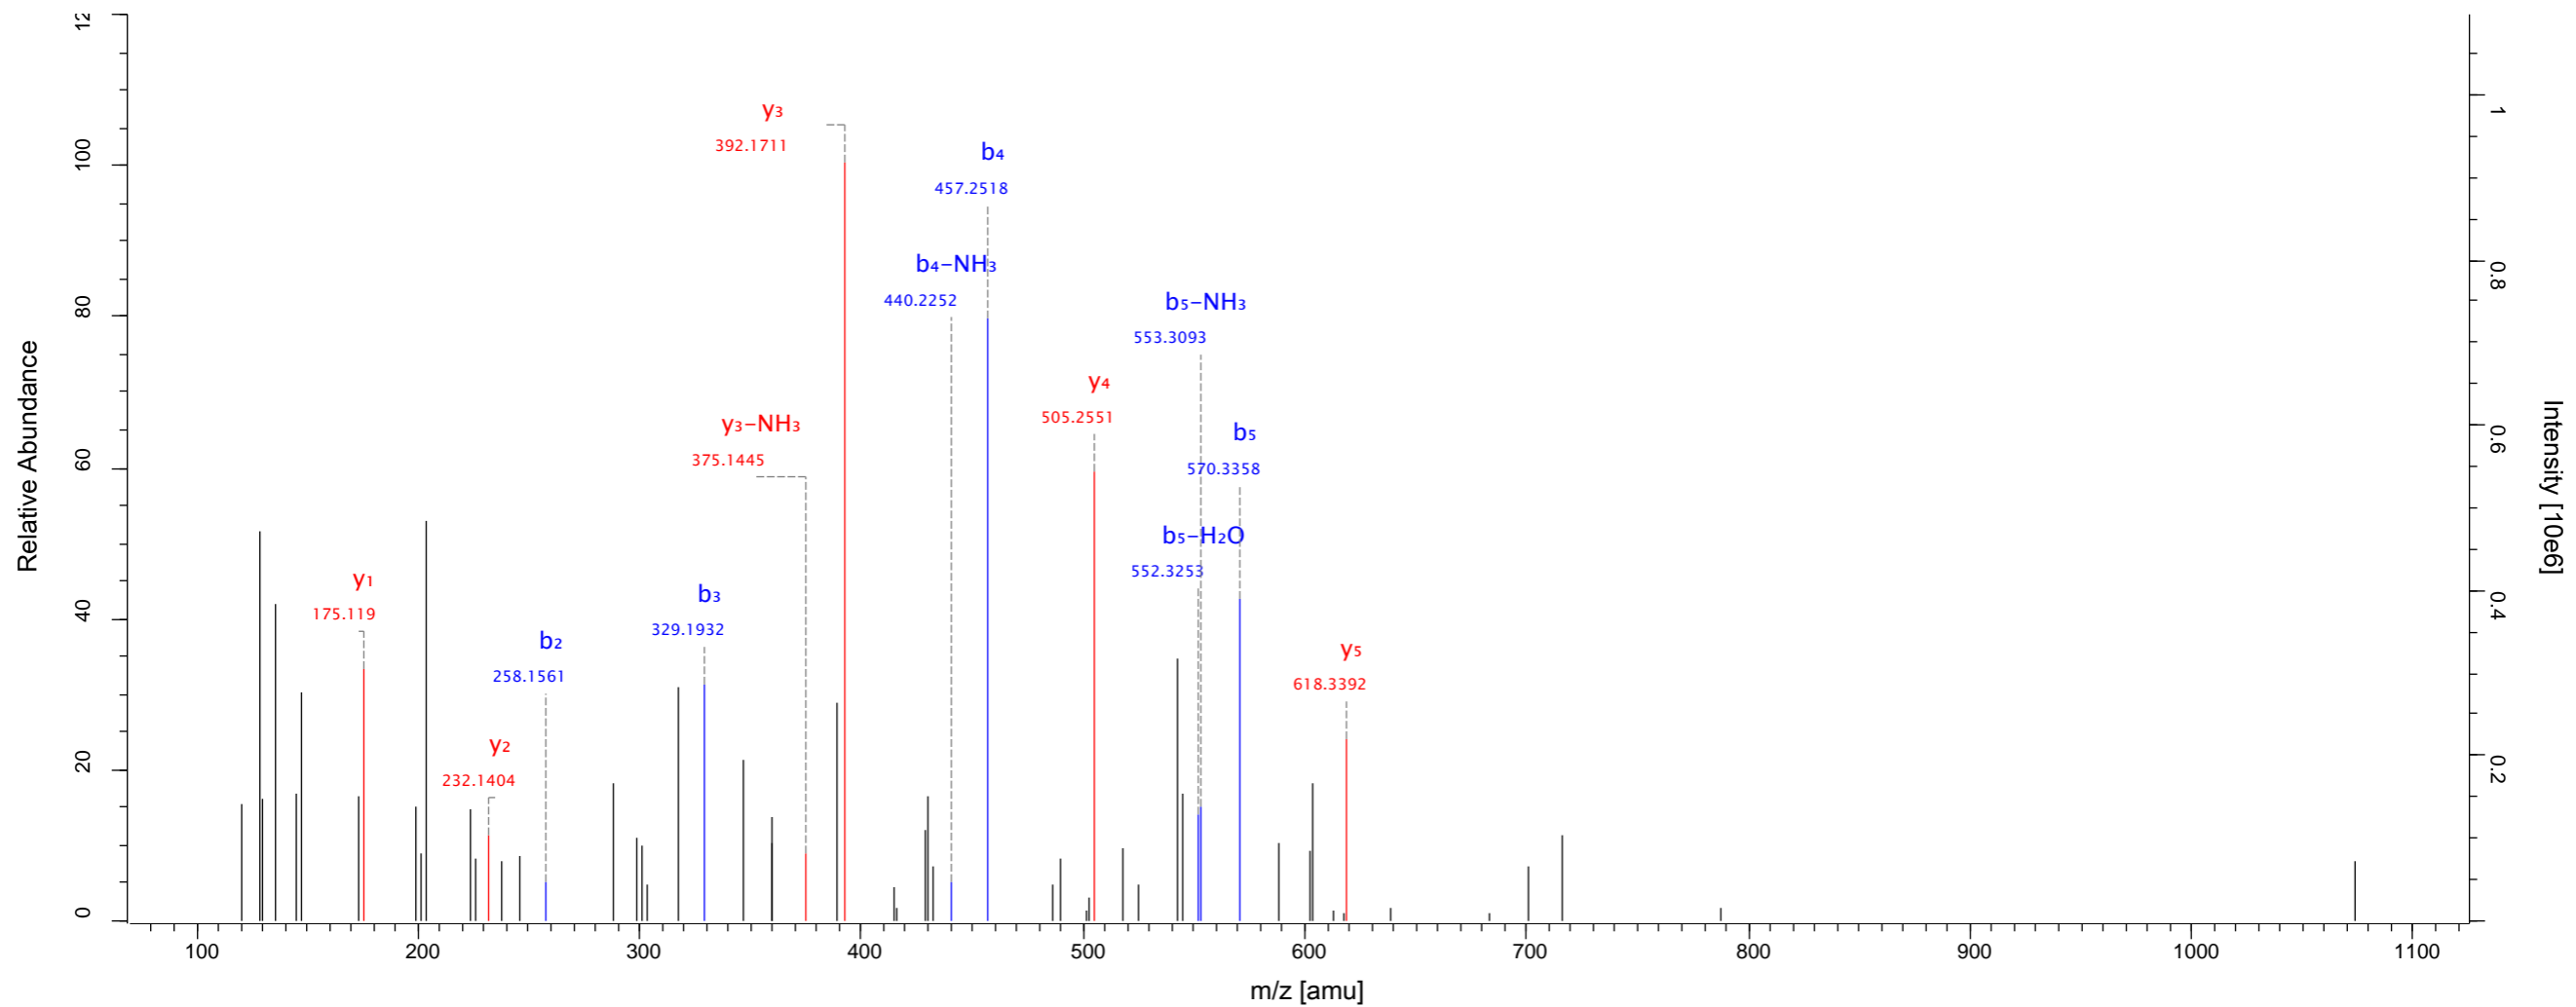

Raw file: 20111212\_EXQ5\_AnMi\_QC\_HCMVp1\_26  
Scan number: 10806  
Protein: ORFL235W + NC\_006273.2[149239,150022]+ <unknown description>  
Peptide score: 68.81  
Method: FTMS; HCD

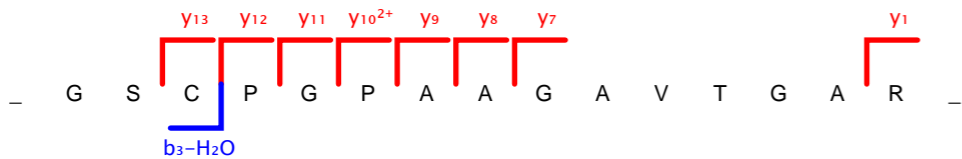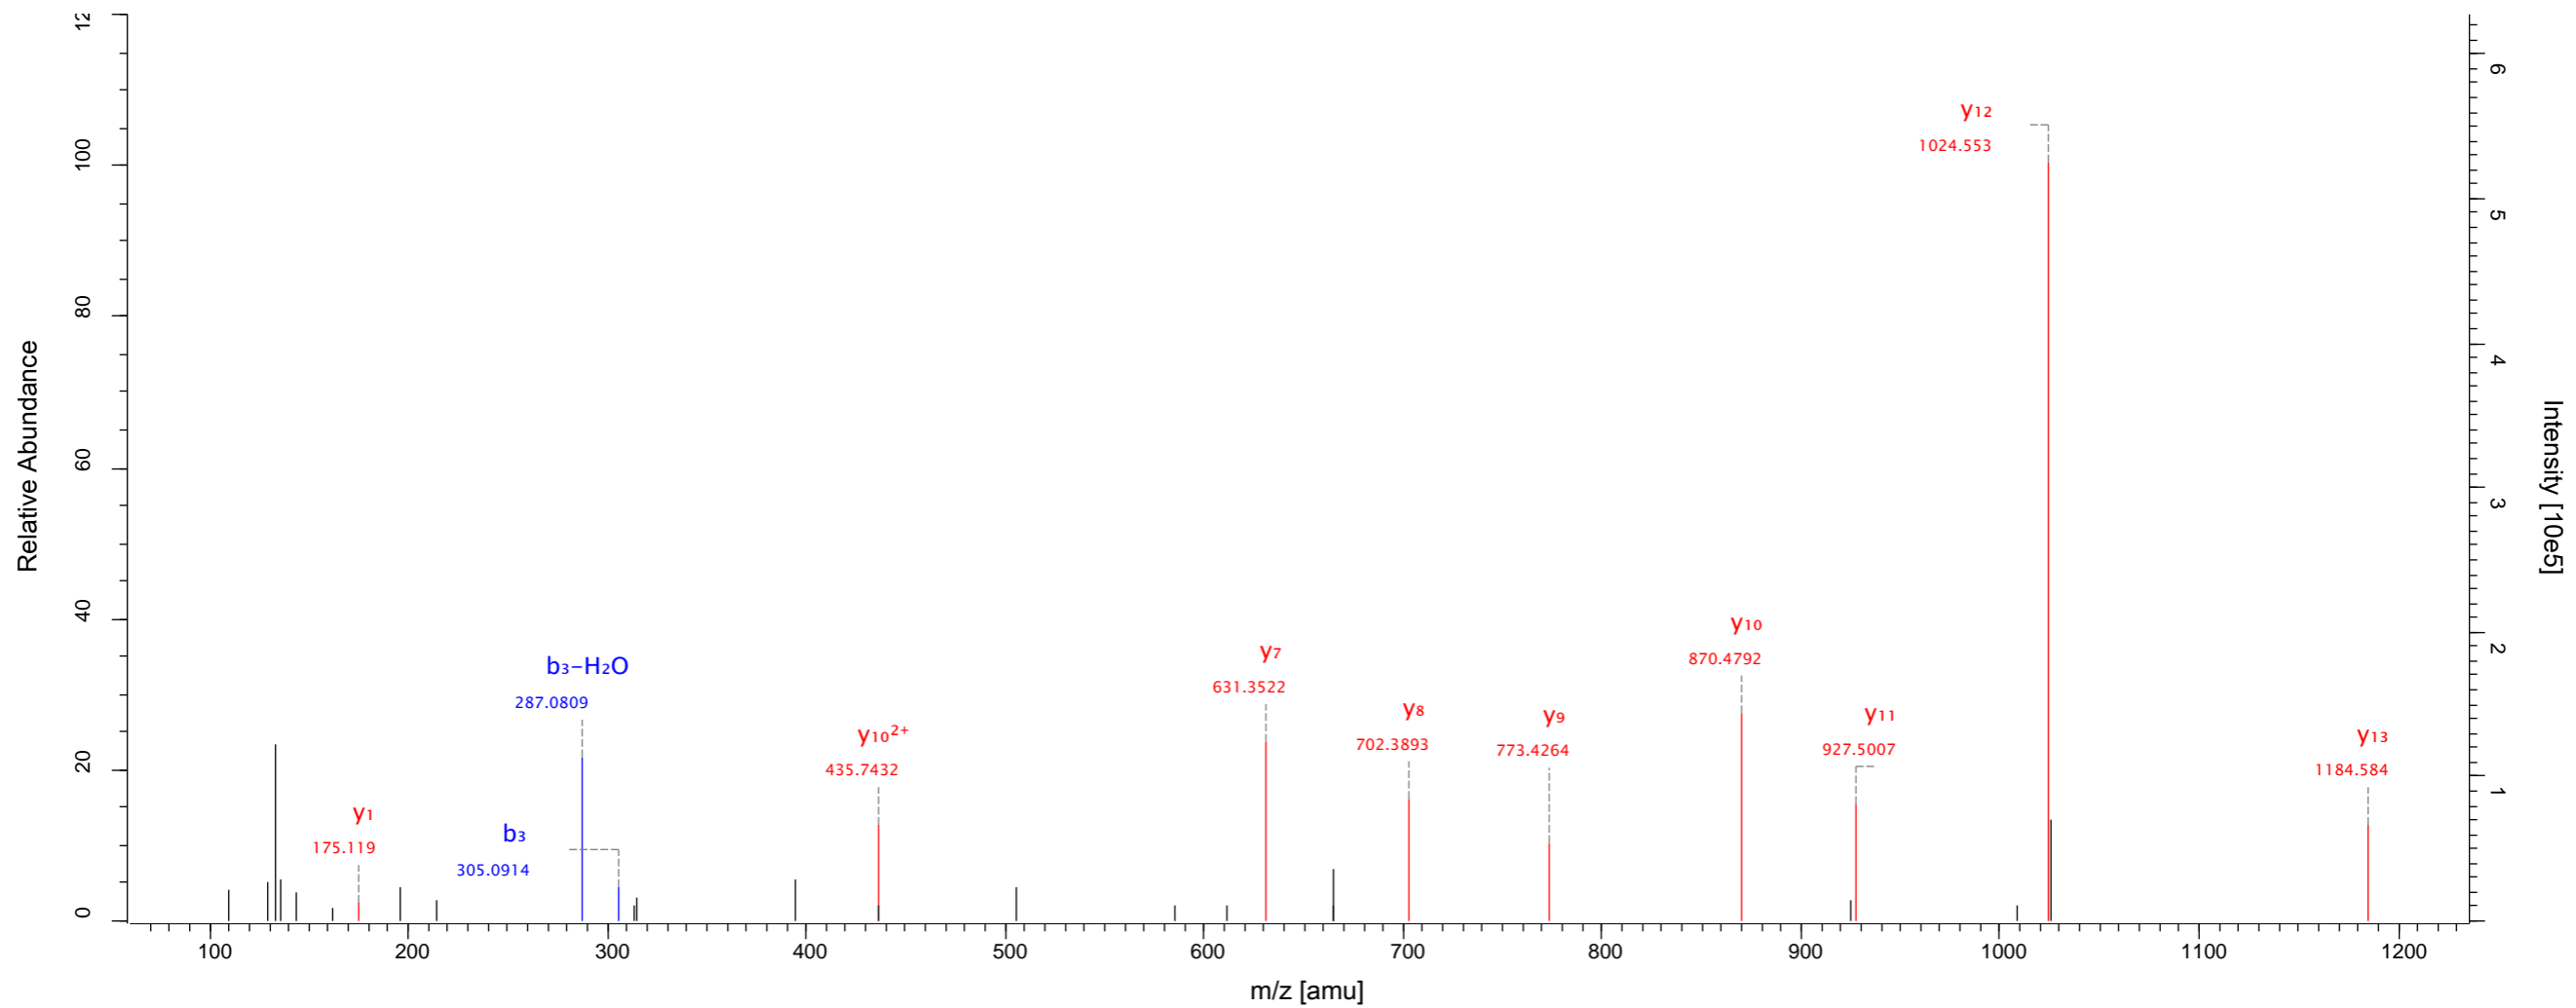

Raw file: 20111212\_EXQ5\_AnMi\_QC\_HCMVp1\_26  
Scan number: 10866  
Protein: ORFL299W + NC\_006273.2[185047,185685]+ <unknown description>  
Peptide score: 120.12  
Method: FTMS; HCD

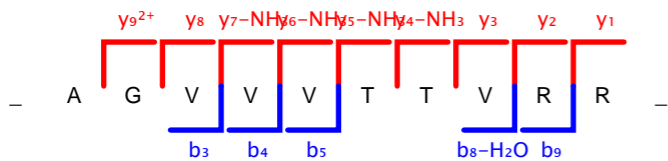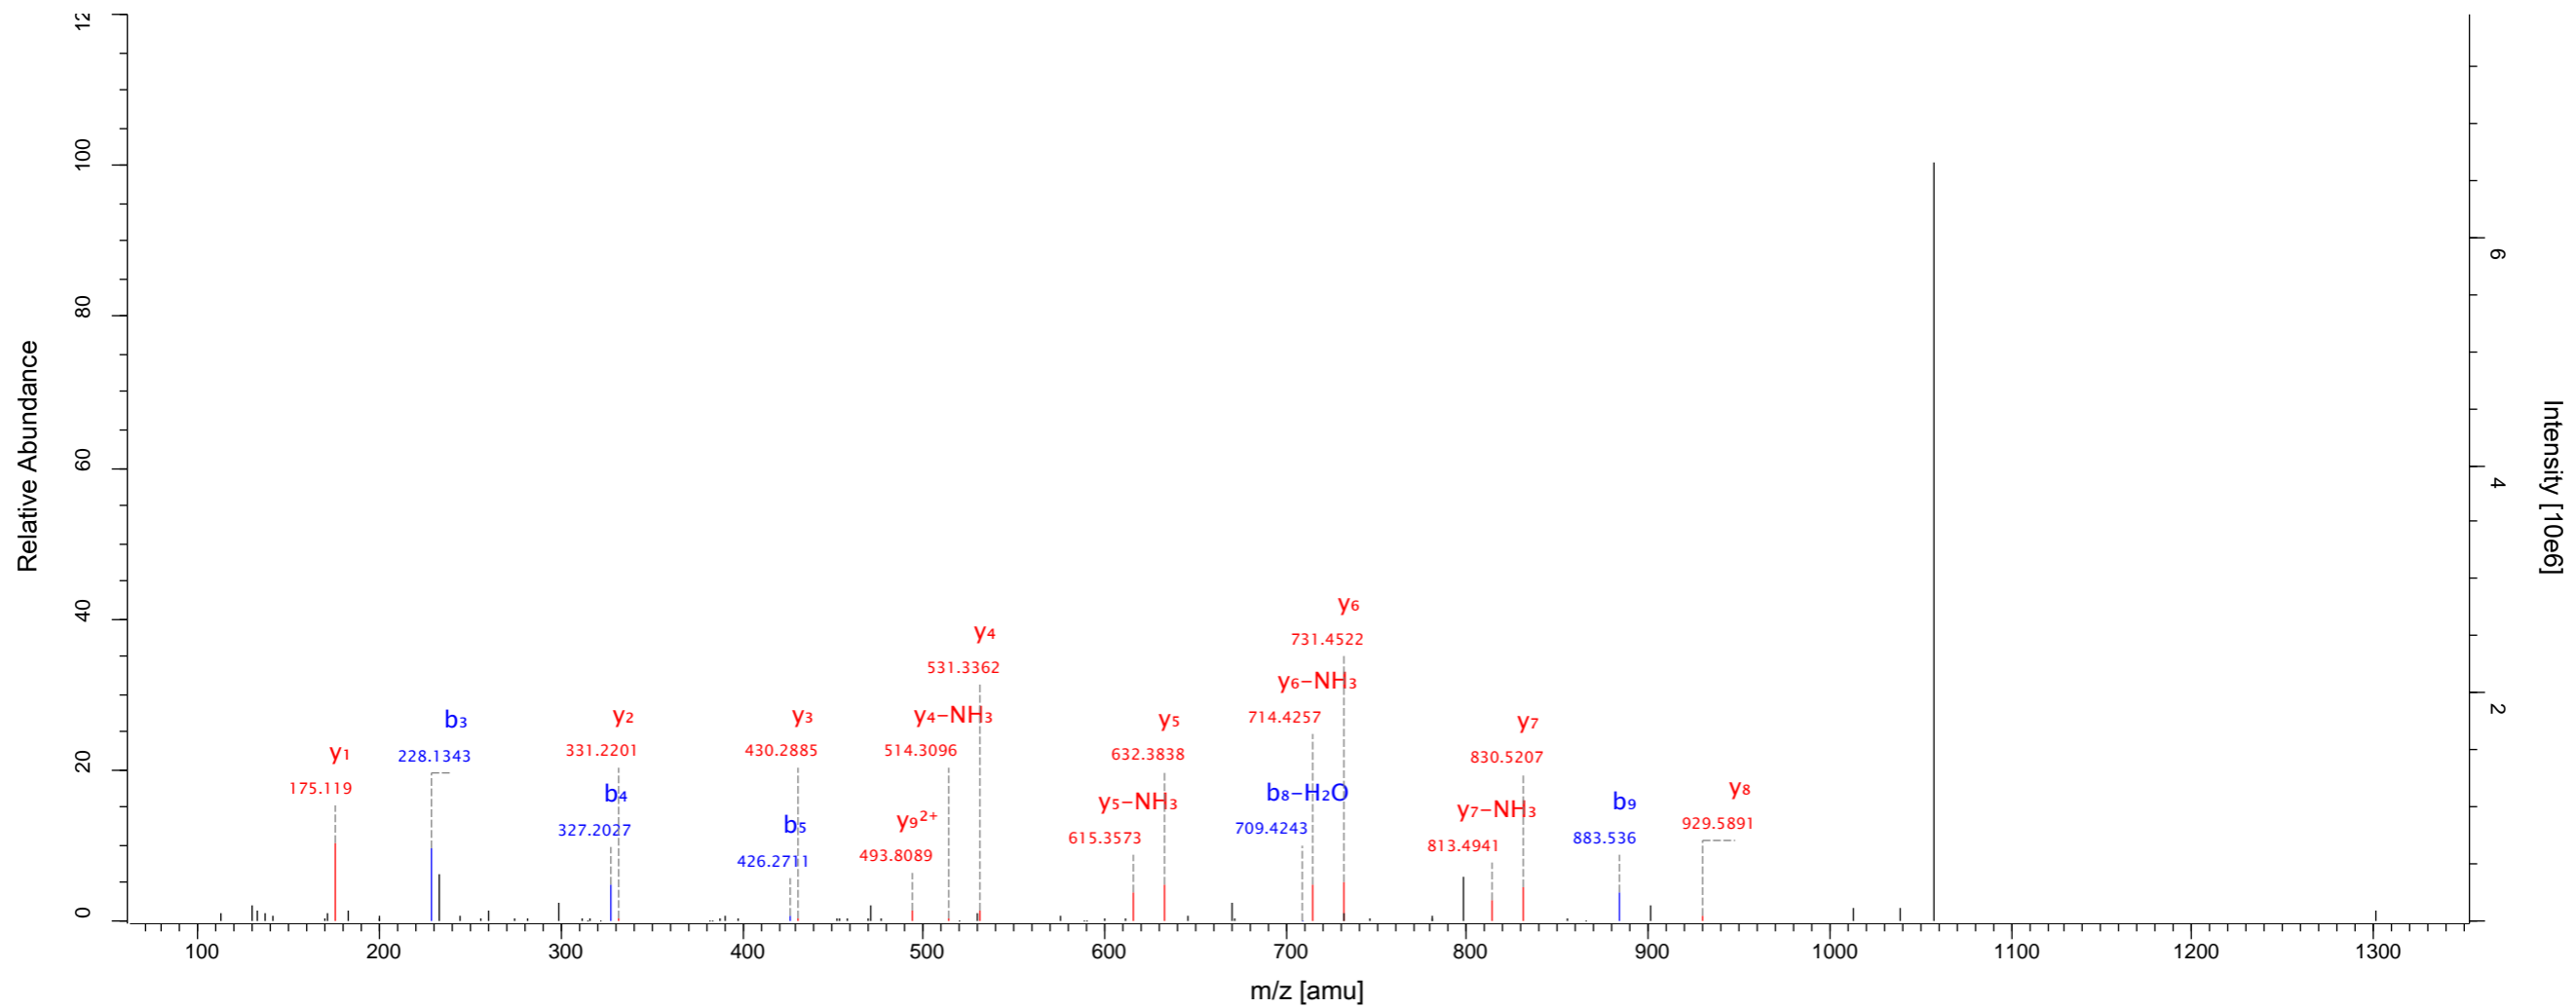

Raw file: 20111212\_EXQ5\_AnMi\_QC\_HCMVp11\_26  
 Scan number: 11246  
 Protein: ORFL271C.iORF1 - NC\_006273.2[176607,176858]- <unknown description>  
 Peptide score: 174.16  
 Method: FTMS; HCD

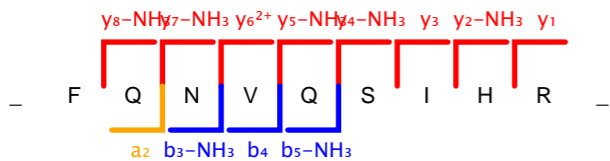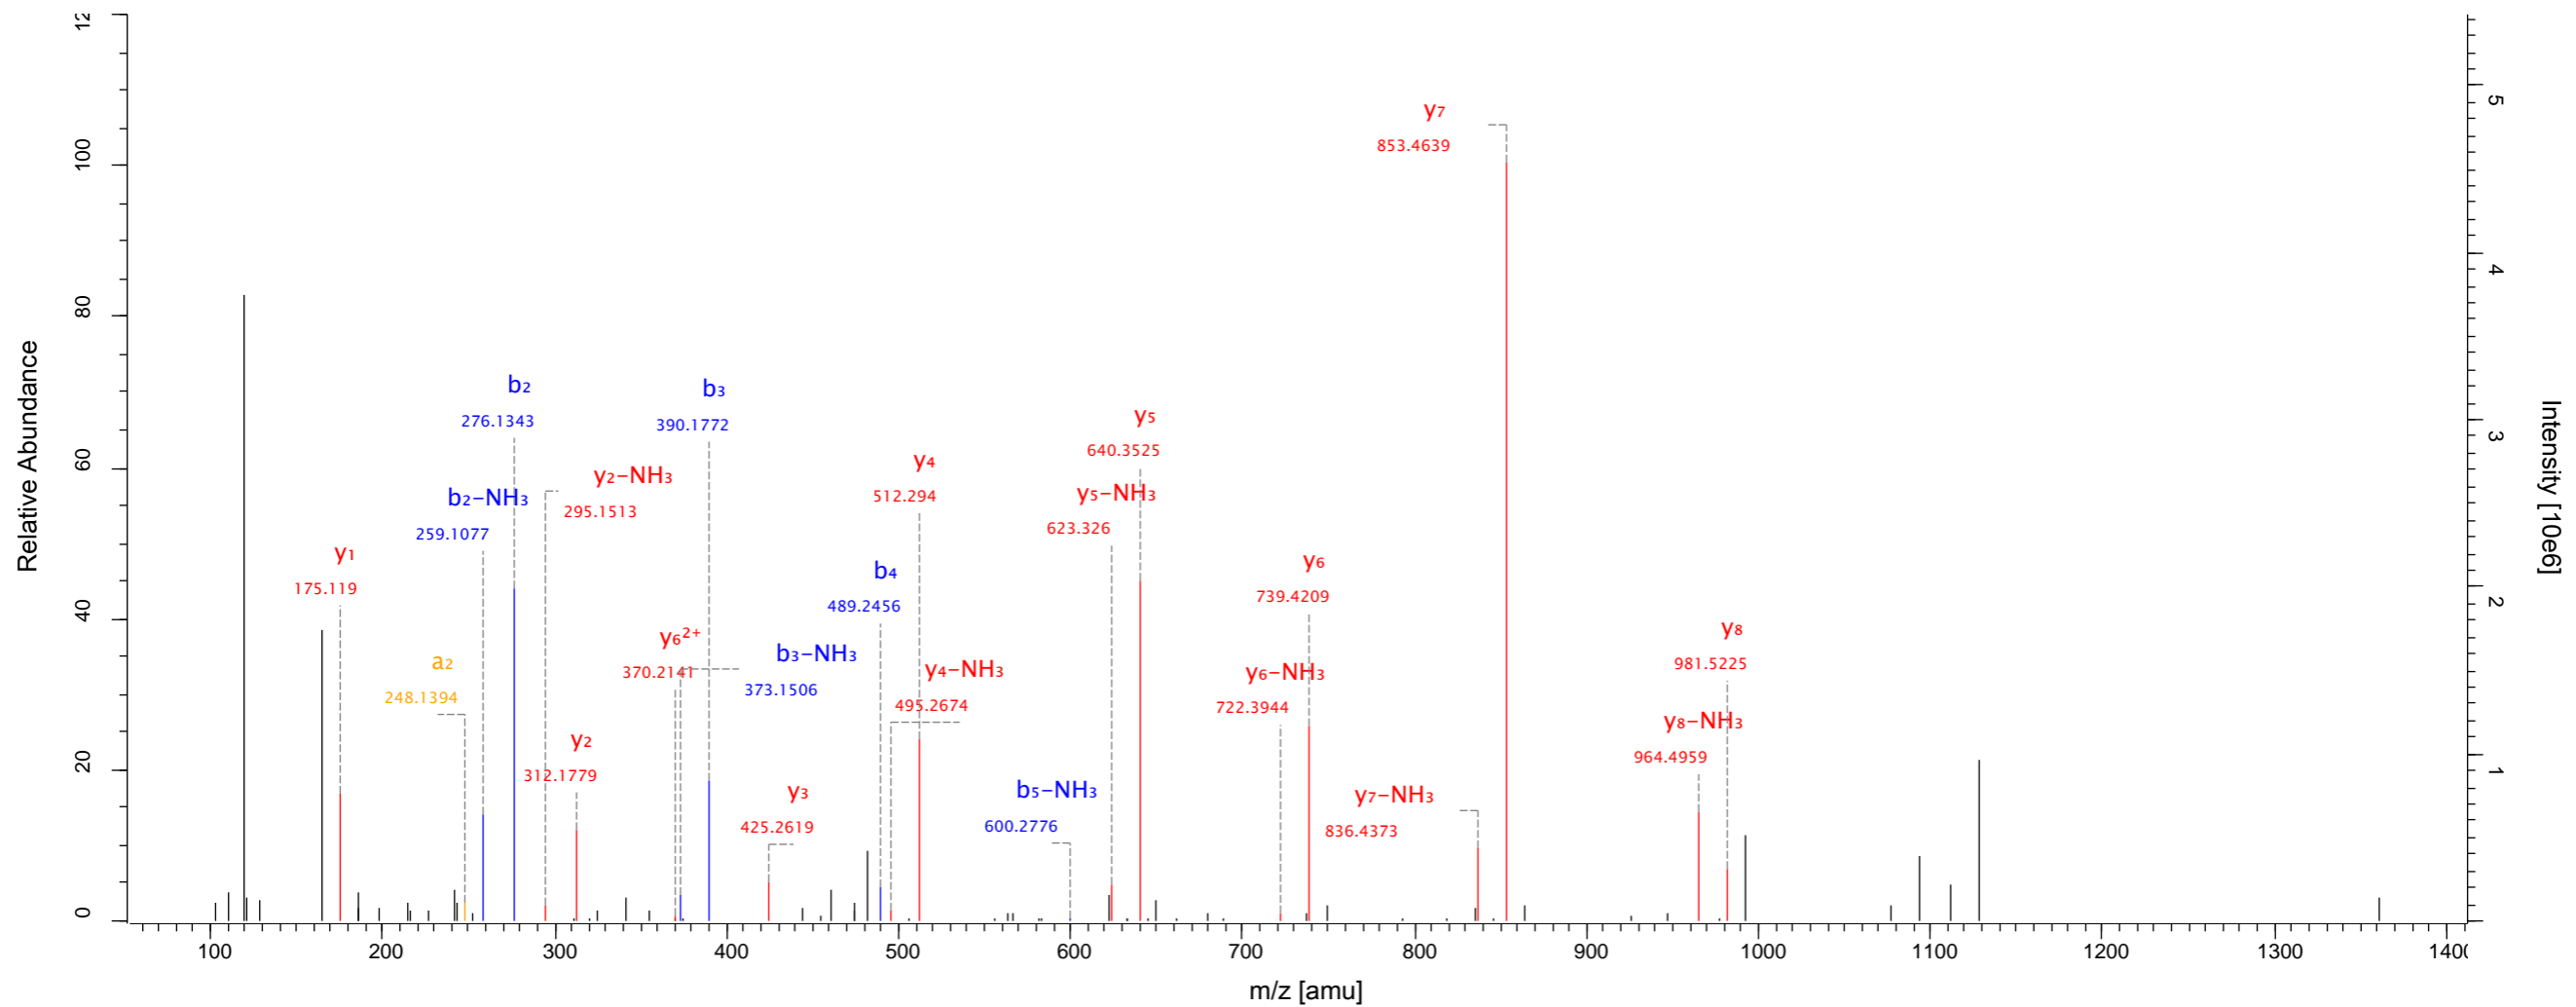

Raw file: 20111212\_EXQ5\_AnMi\_QC\_HCMVp1\_26  
Scan number: 11864  
Protein: ORFL301C - NC\_006273.2[185358,185666]- <unknown description>  
Peptide score: 112.13  
Method: FTMS; HCD

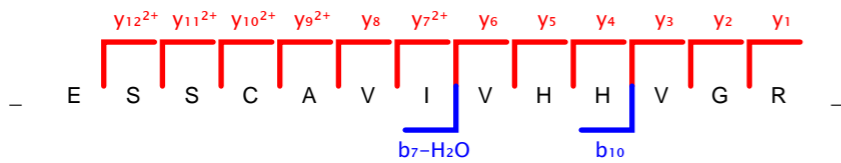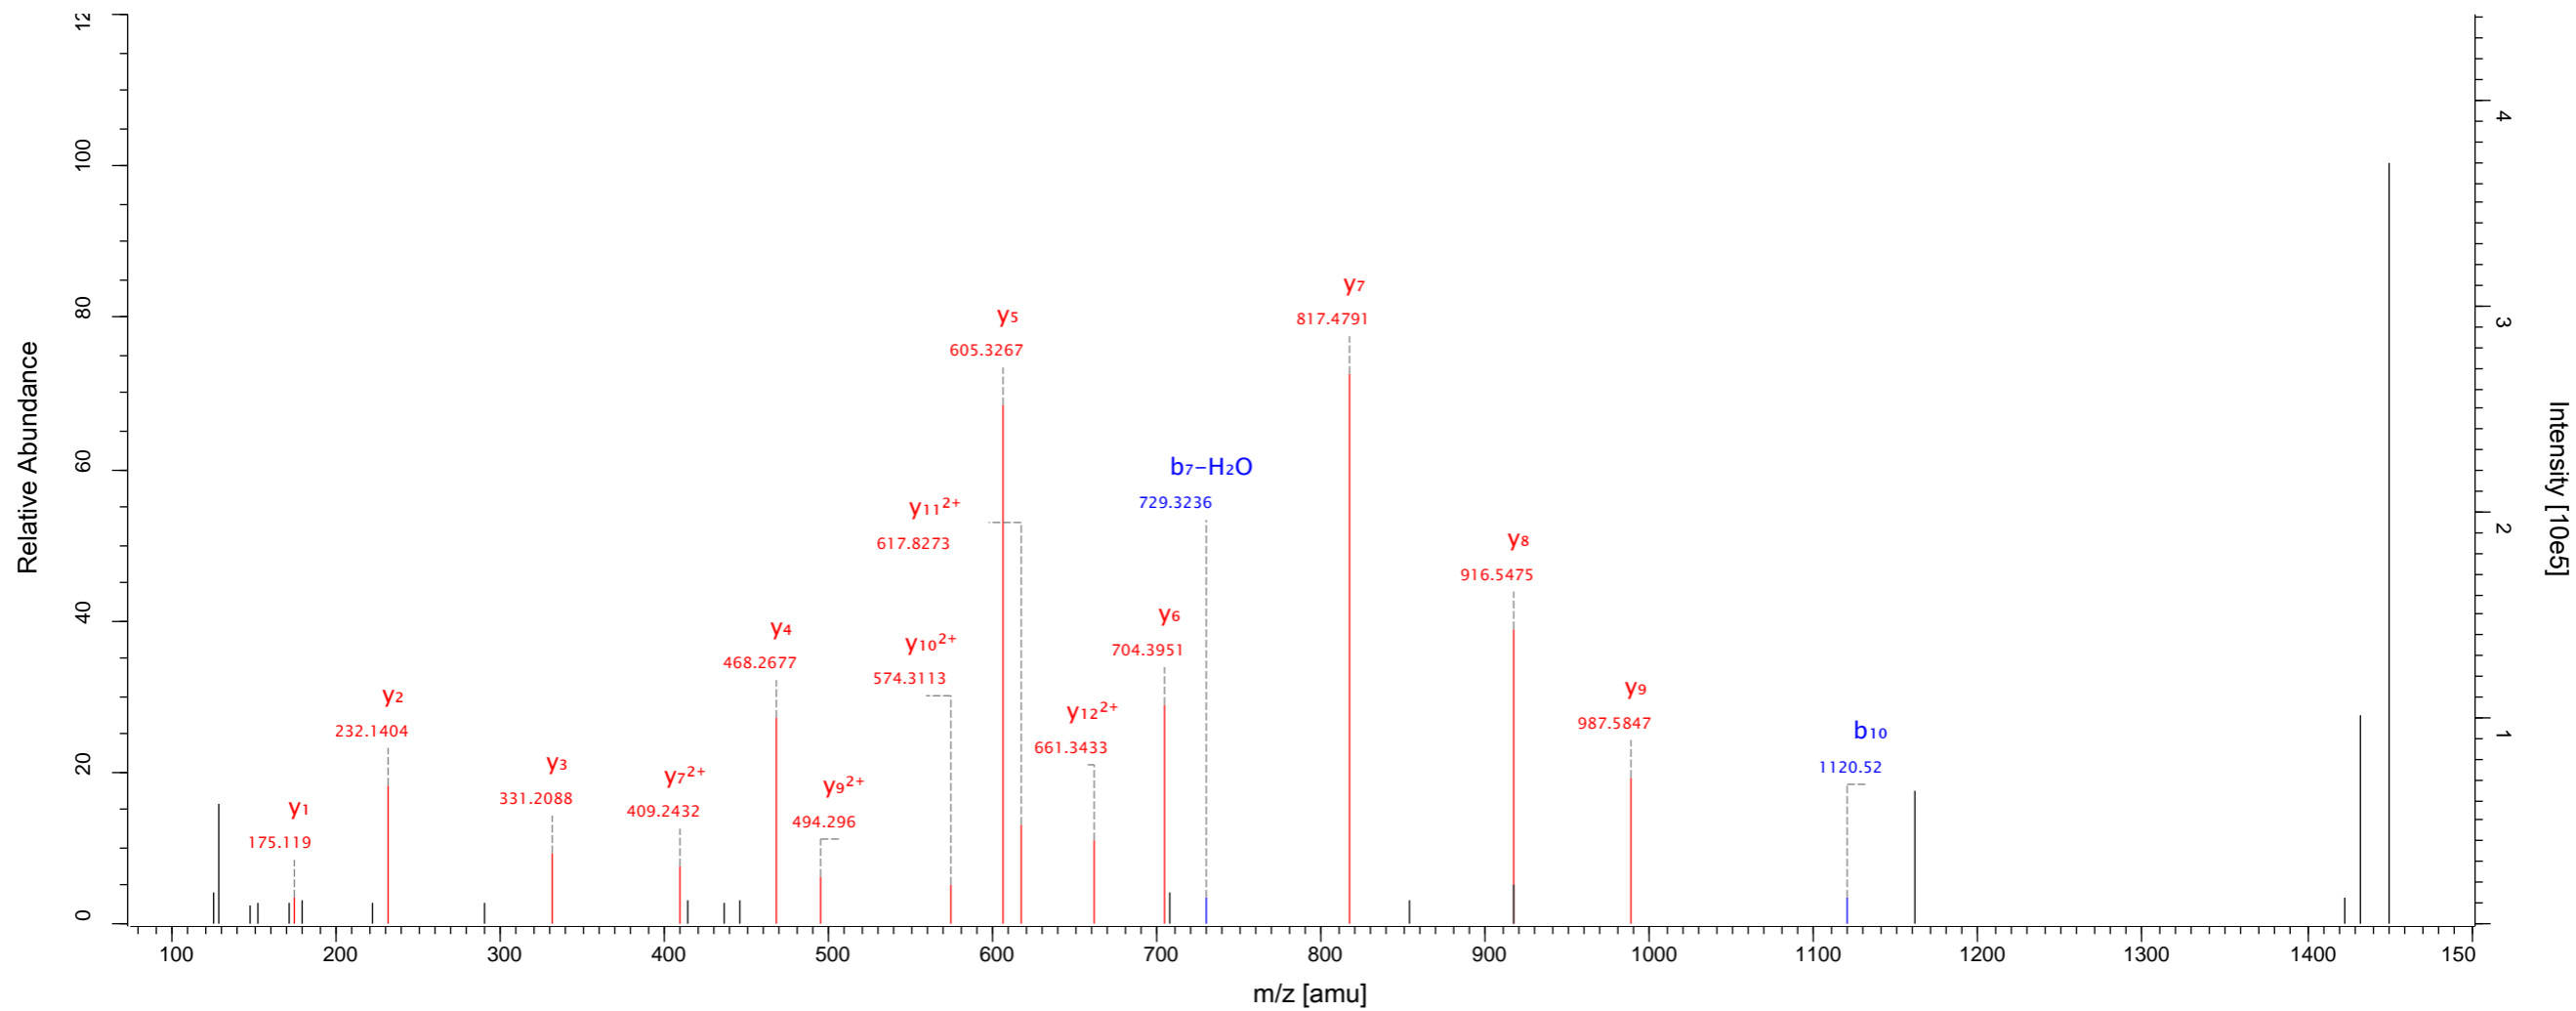

Raw file: 20111212\_EXQ5\_AnMi\_QC\_HCMVp1\_26  
Scan number: 11968  
Protein: ORFL301C - NC\_006273.2[185358,185666]- <unknown description>  
Peptide score: 44.38  
Method: FTMS; HCD

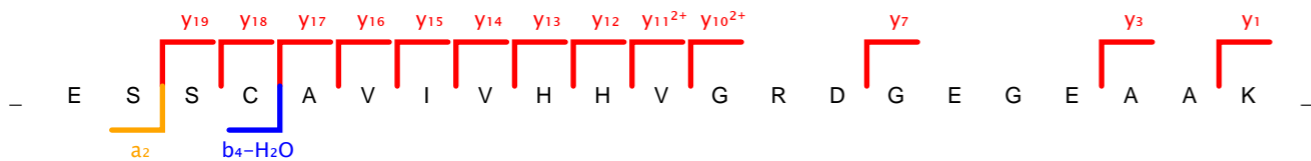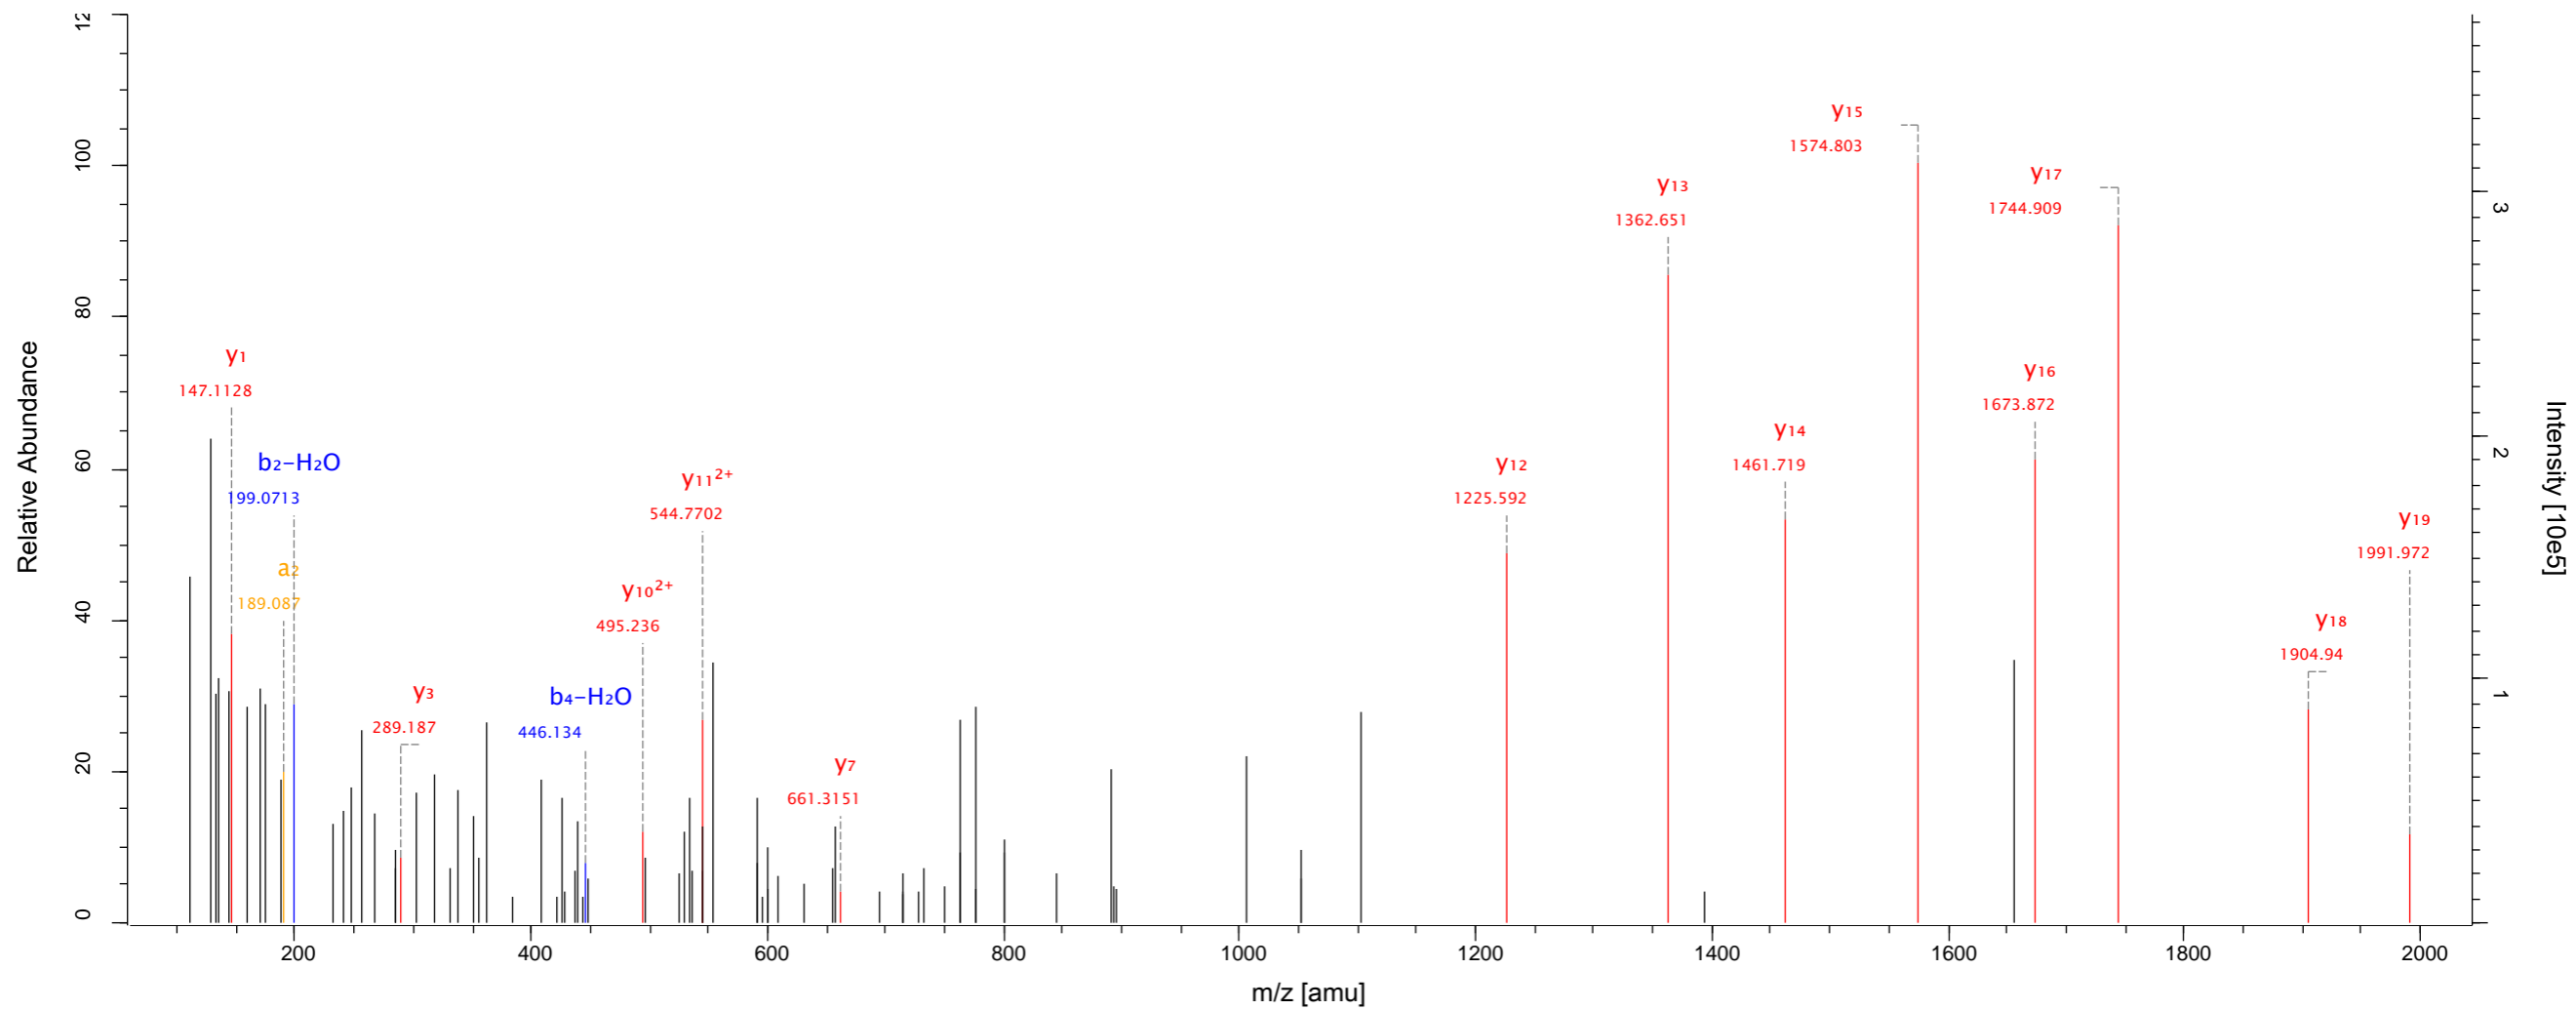



Raw file: 20111212\_EXQ5\_AnMi\_QC\_HCMVp1\_26  
Scan number: 12344  
Protein: ORFL137W.iORF1 + NC\_006273.2[75299,75529]+ <unknown description>  
Peptide score: 66.96  
Method: FTMS; HCD

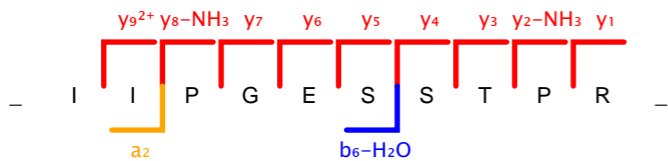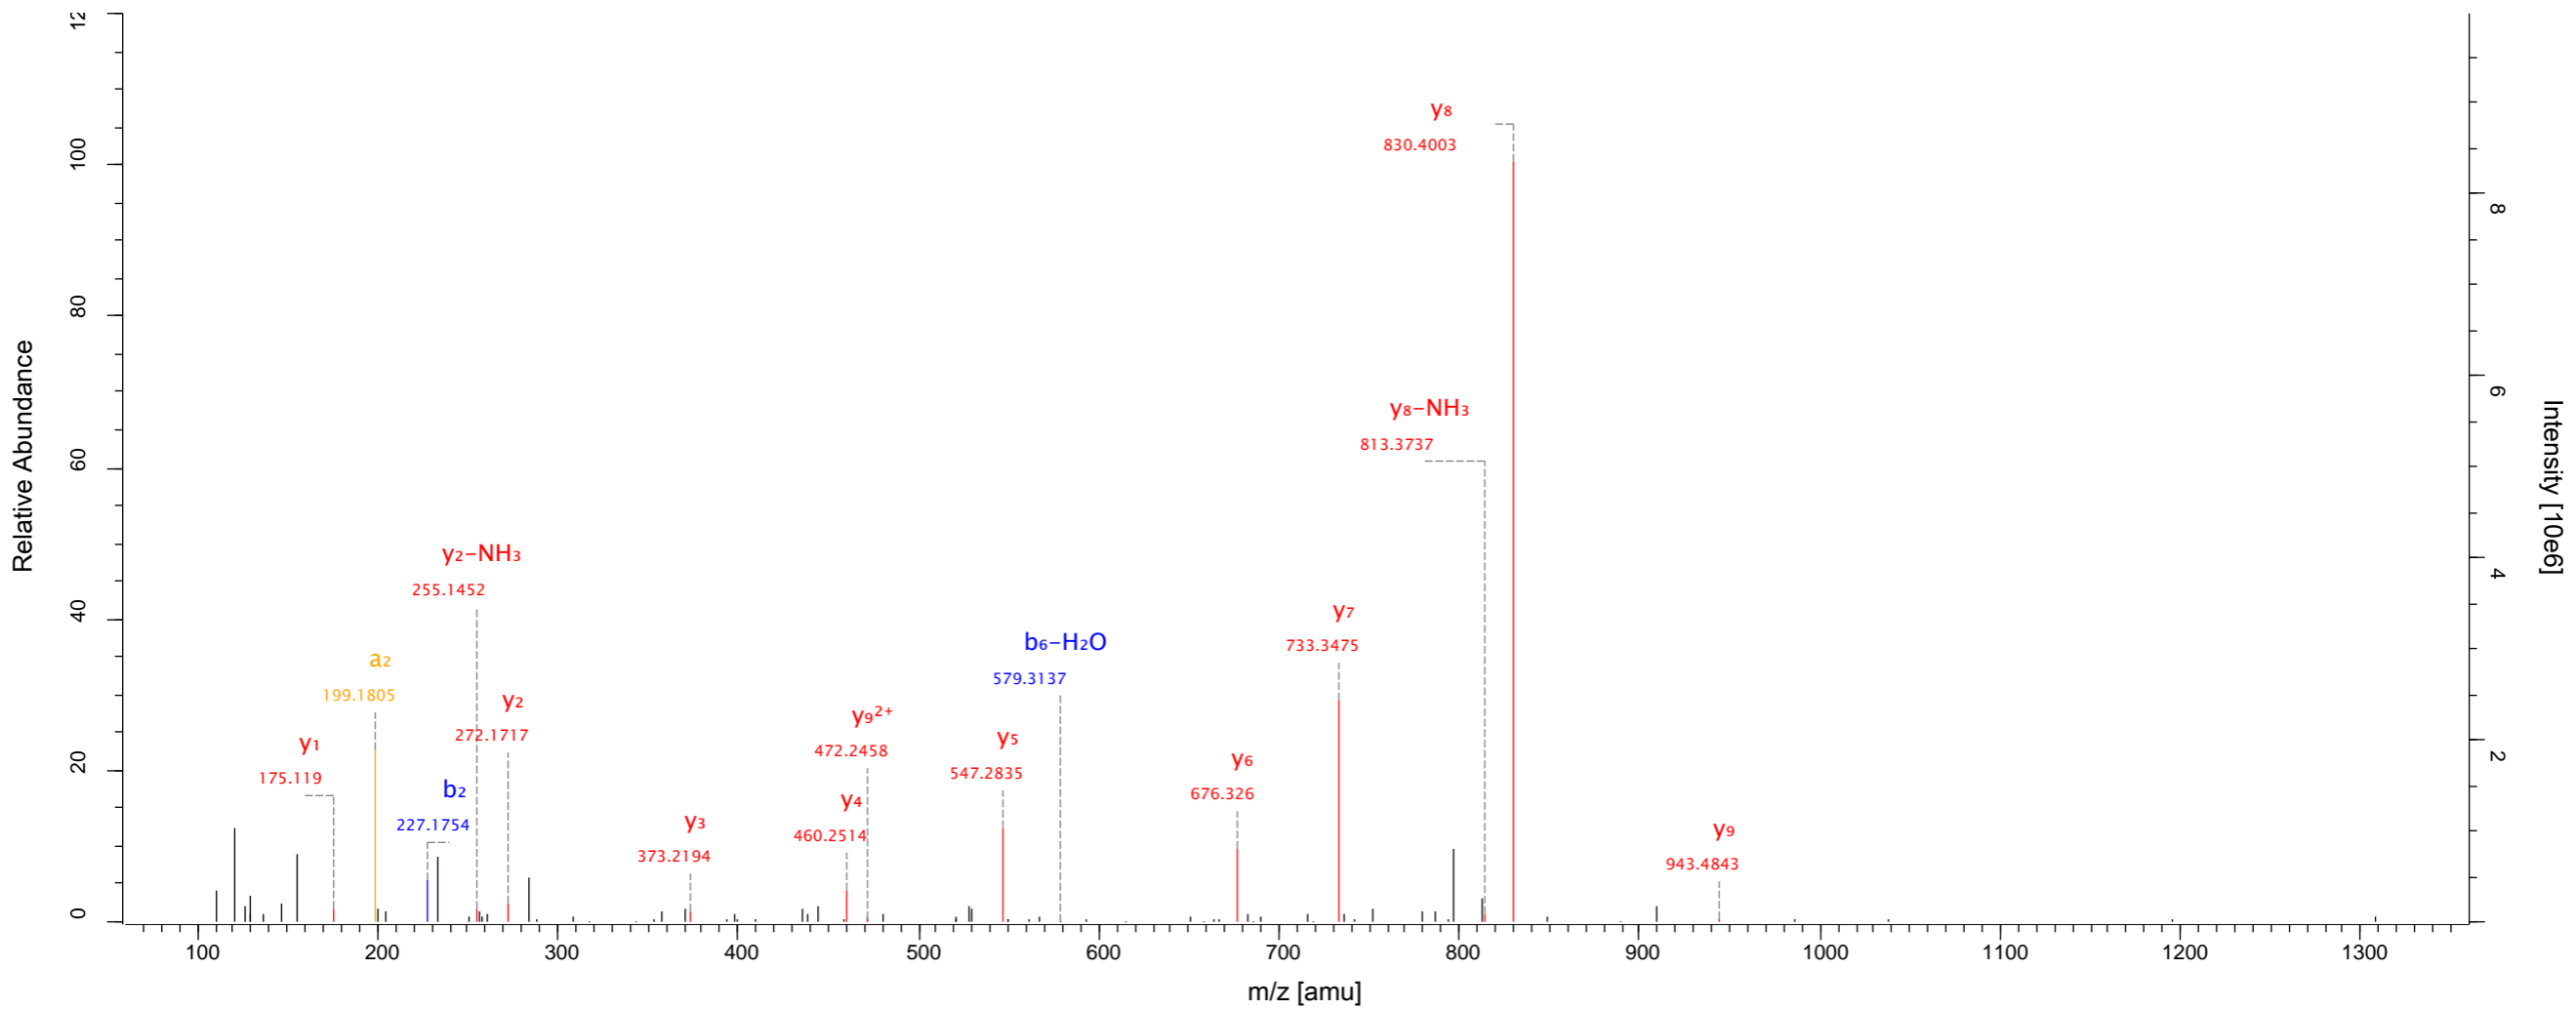

Raw file: 20111212\_EXQ5\_AnMi\_QC\_HCMVp1\_26  
Scan number: 12581  
Protein: ORFL27C - NC\_006273.2[7912,13003]- <unknown description>; ORFL27C.iORF1 - NC\_006273.2[7912,8184]- <unknown description>  
Peptide score: 55.46  
Method: FTMS; HCD

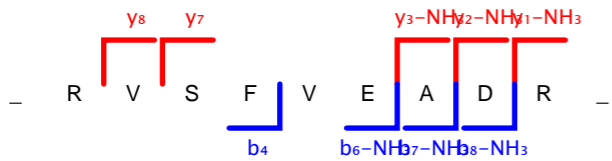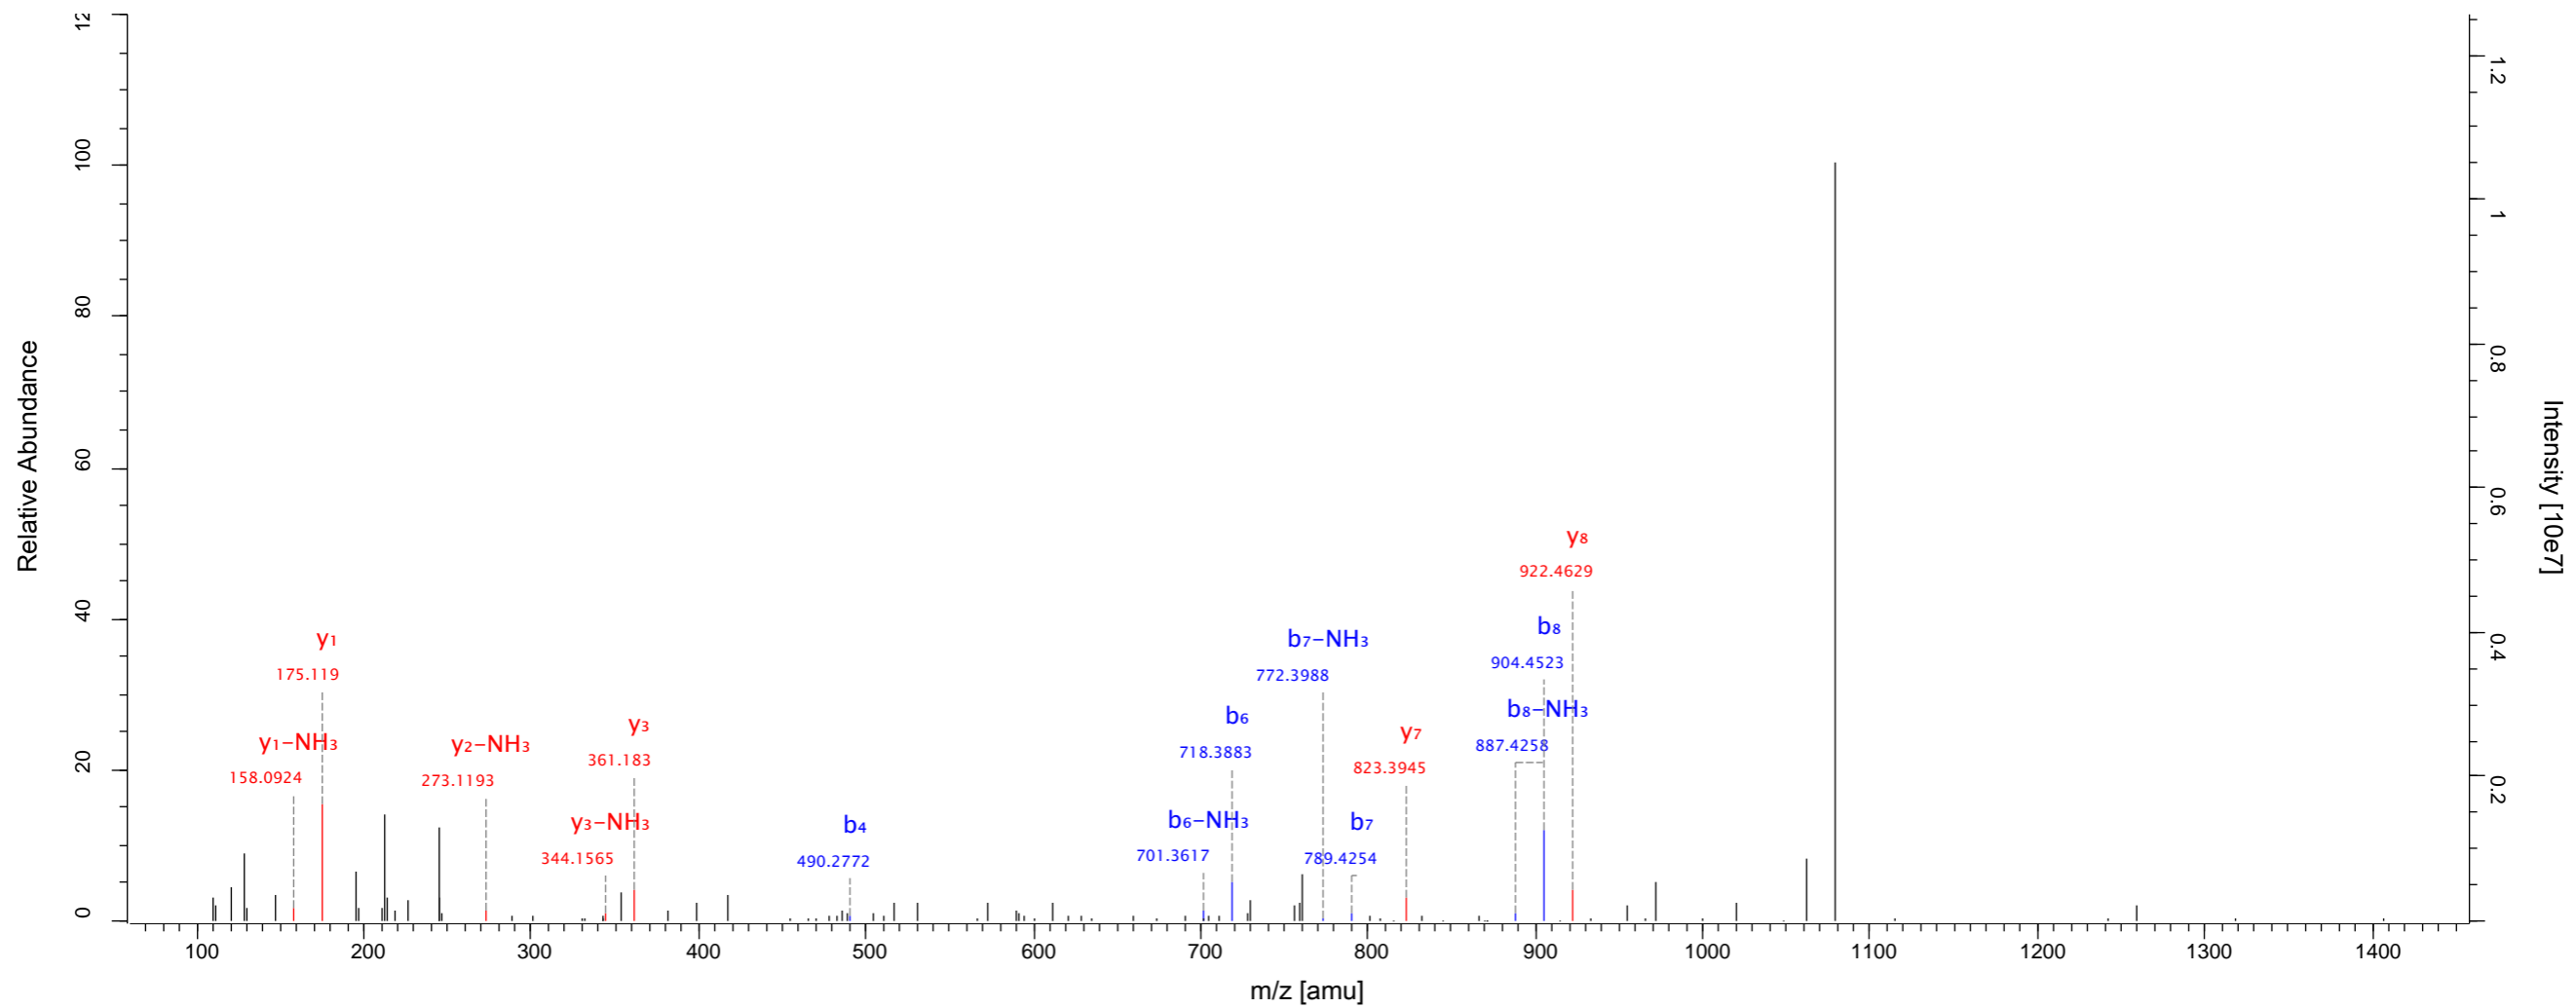

Raw file: 20111212\_EXQ5\_AnMi\_QC\_HCMVp1\_26  
Scan number: 13004  
Protein: ORFL174C.iORF1 - NC\_006273.2[106302,106568]- <unknown description>  
Peptide score: 118.87  
Method: FTMS; HCD

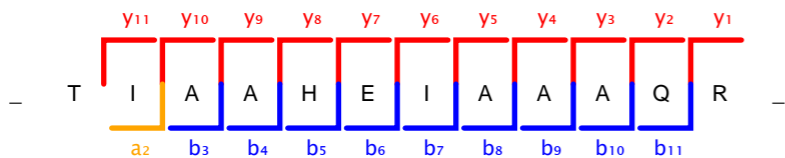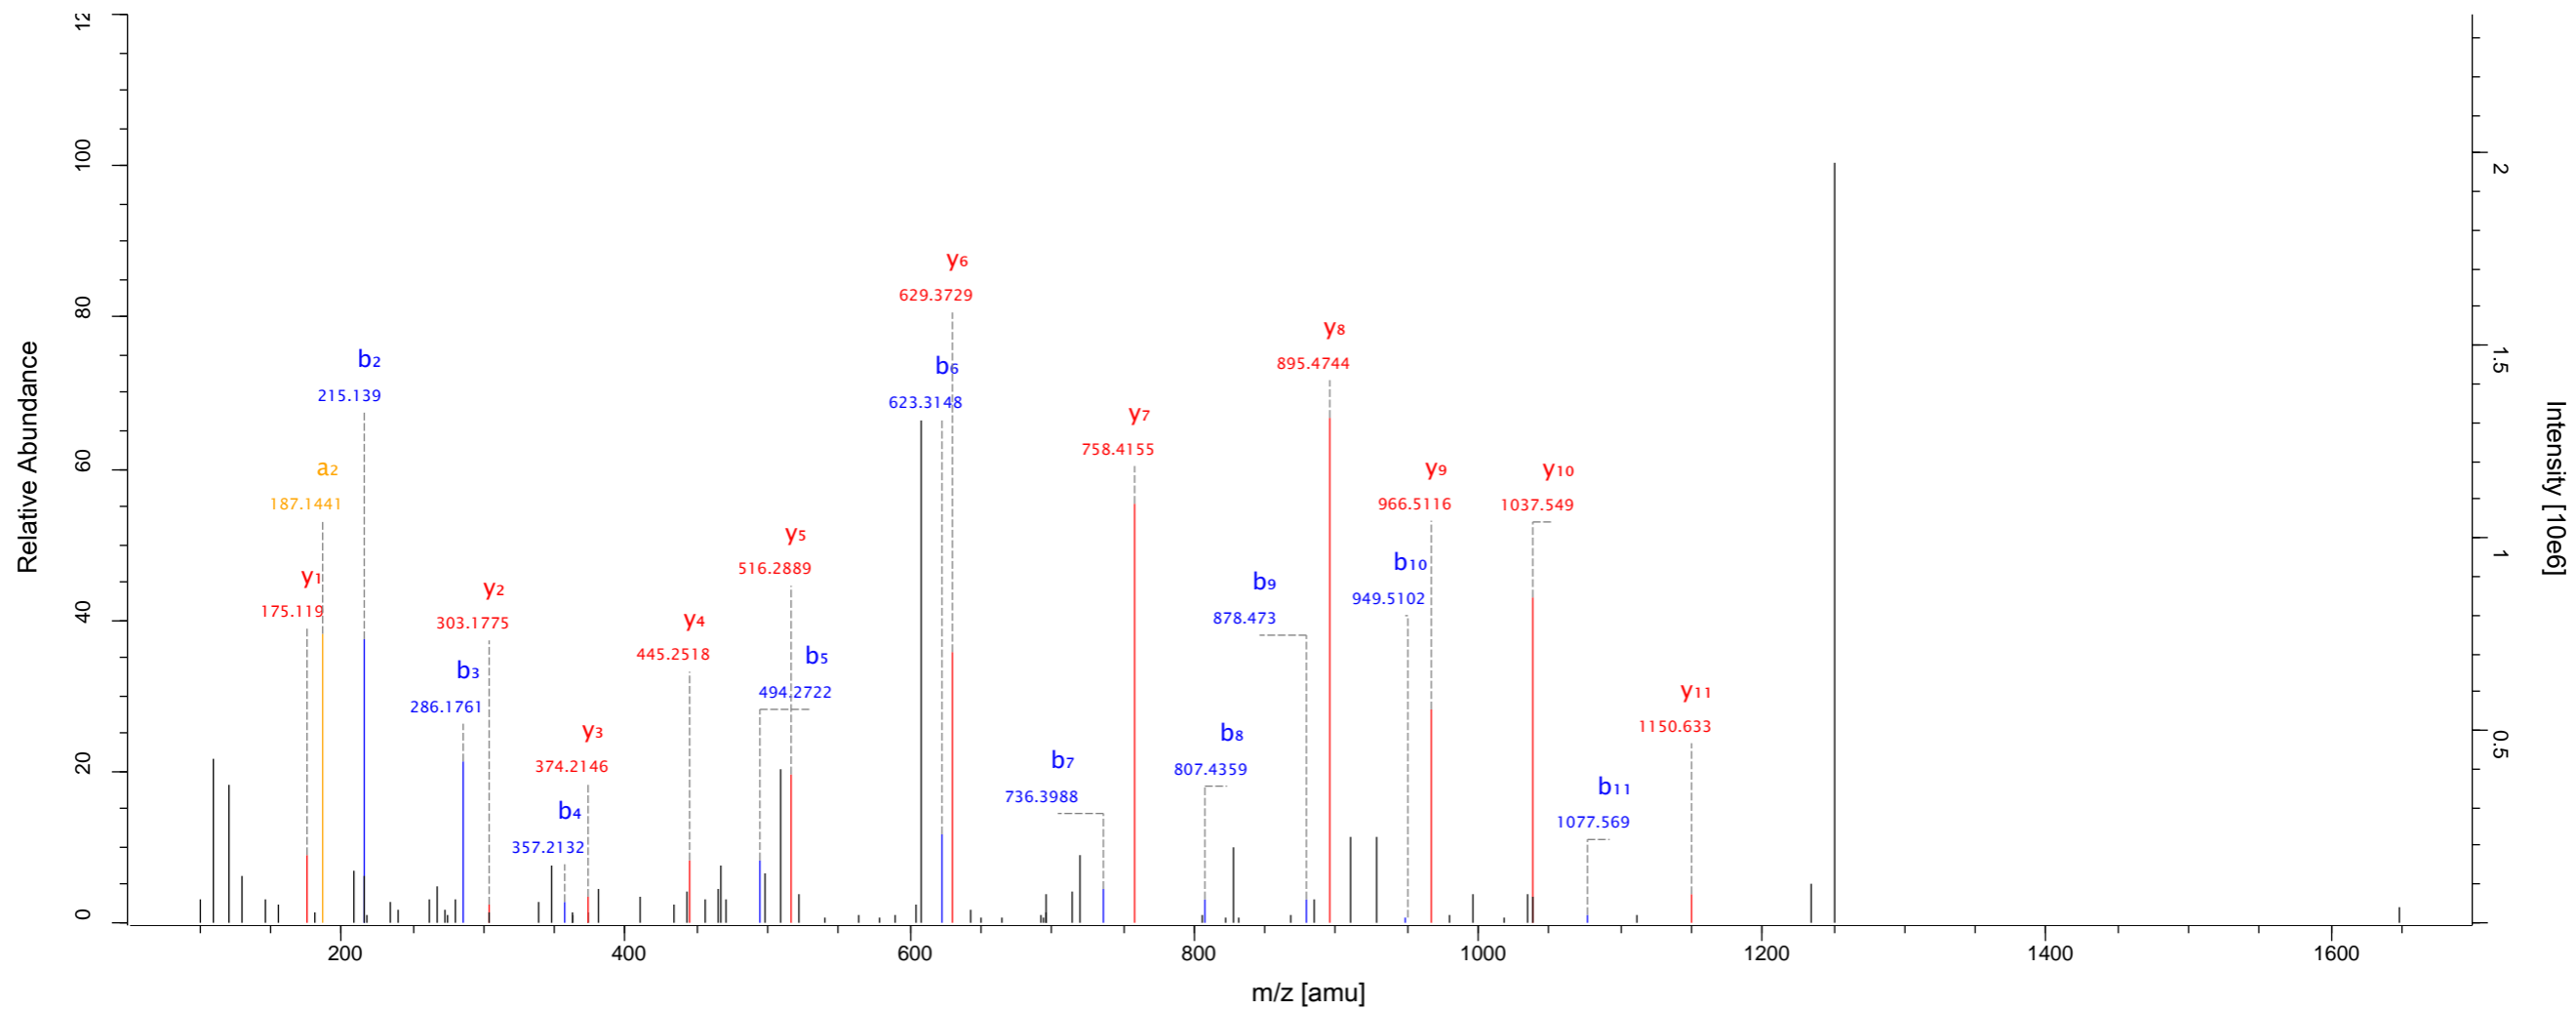

Raw file: 20111212\_EXQ5\_AnMi\_QC\_HCMVp1\_26  
Scan number: 14551  
Protein: ORFL106C - NC\_006273.2[53935,54294]- <unknown description>  
Peptide score: 166.66  
Method: FTMS; HCD

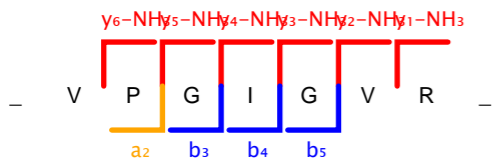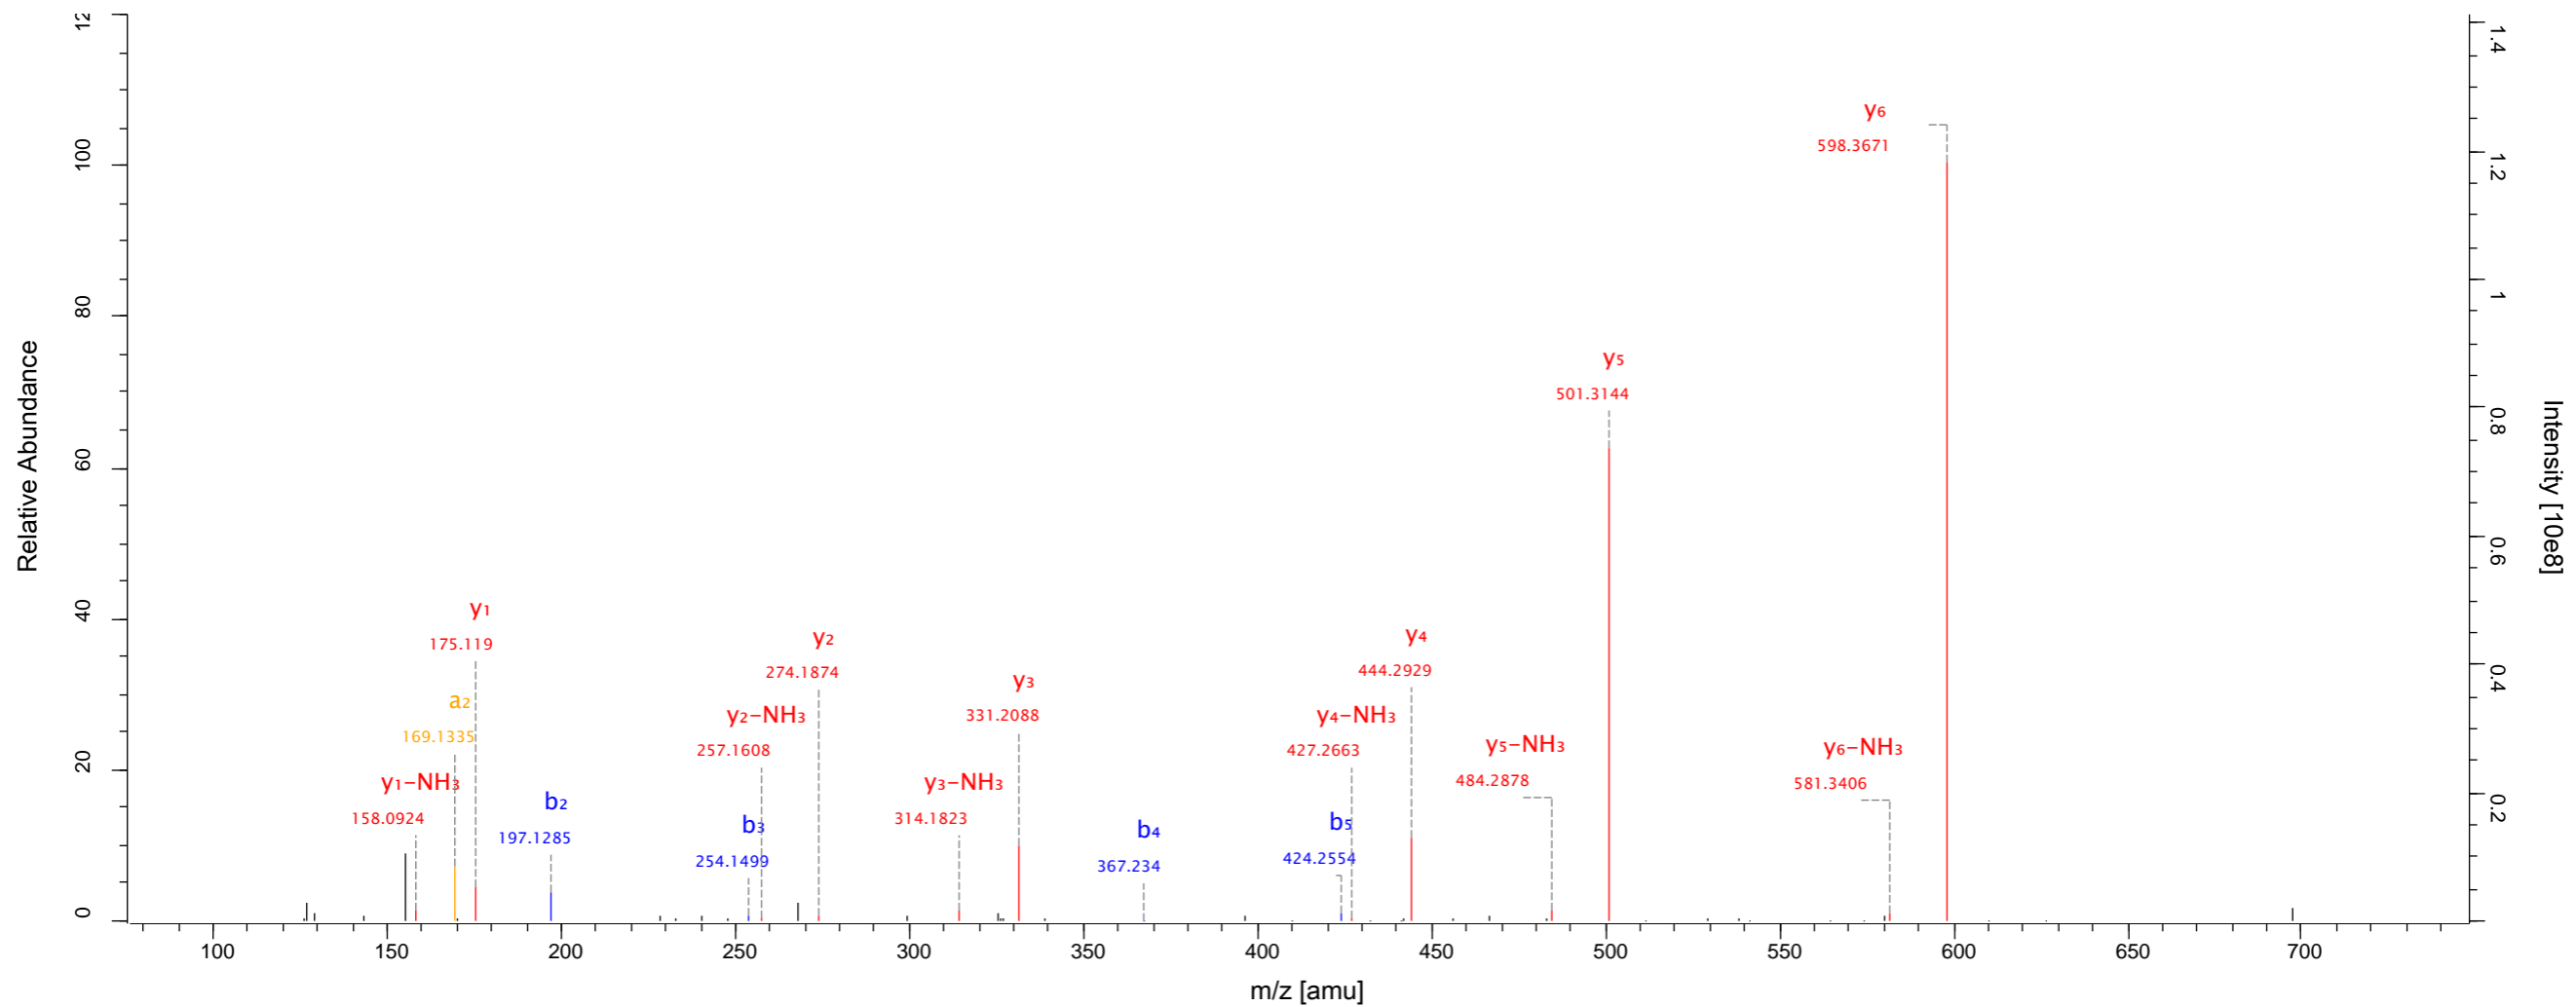

Raw file: 20111212\_EXQ5\_AnMi\_QC\_HCMVp11\_26  
Scan number: 14782  
Protein: ORFL223W + NC\_006273.2[139458,139730]+ <unknown description>  
Peptide score: 164.65  
Method: FTMS; HCD

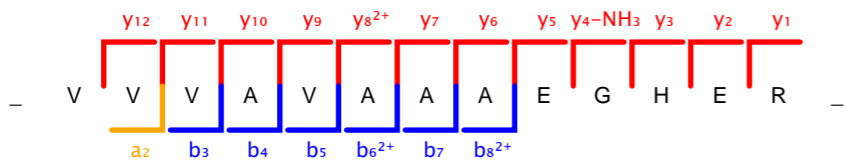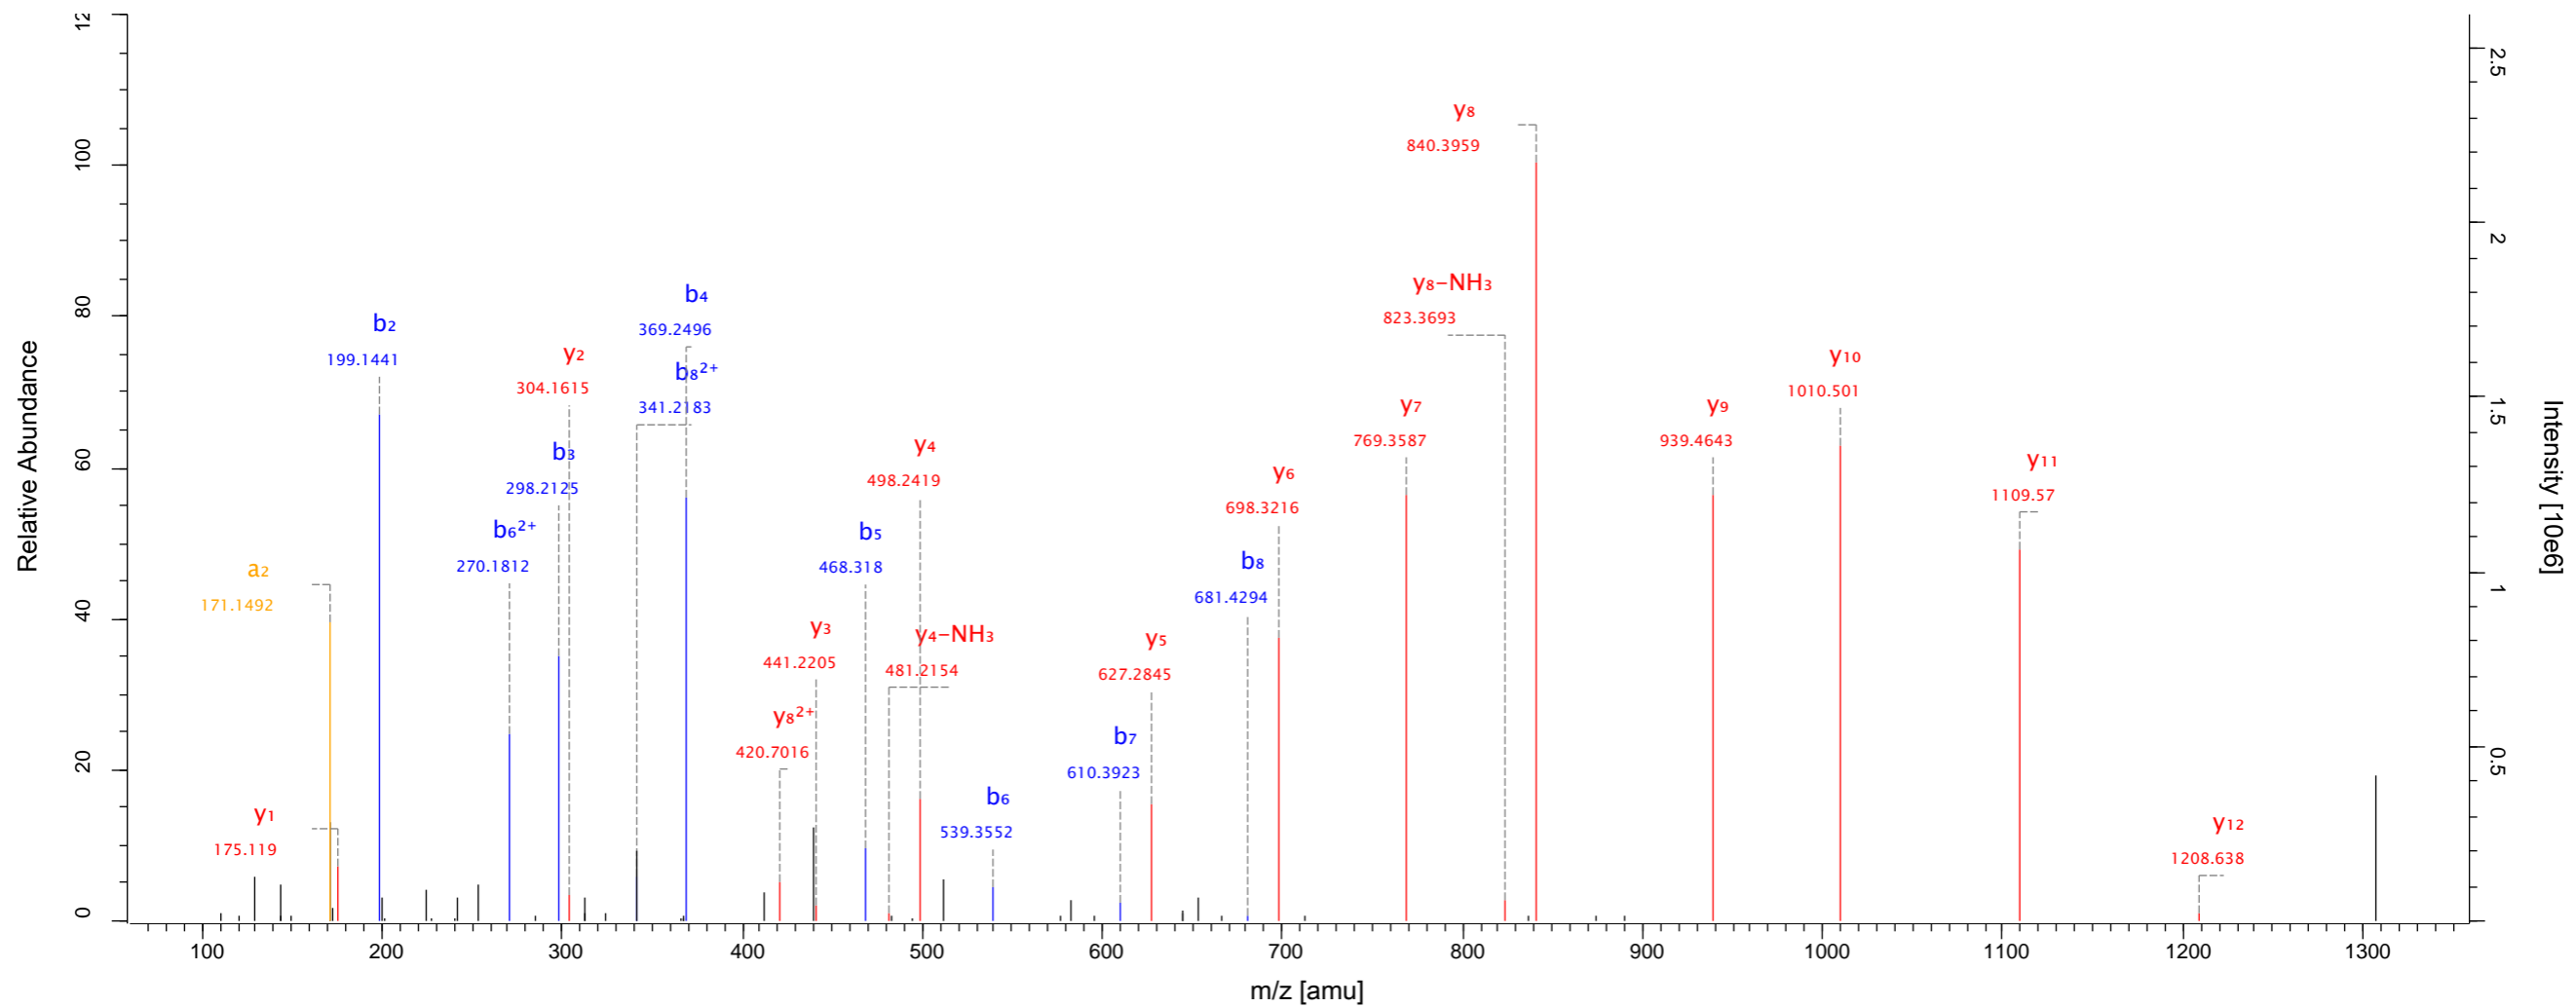

Raw file: 20111212\_EXQ5\_AnMi\_QC\_HCMVp1\_26  
Scan number: 15914  
Protein: ORFL159W + NC\_006273.2[101475,109052]+ <unknown description>; ORFL159W.iORF1 + NC\_006273.2[101526,109052]+ <unknown description>  
Peptide score: 101.64  
Method: FTMS; HCD

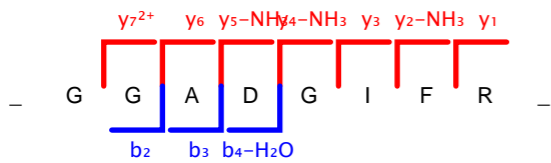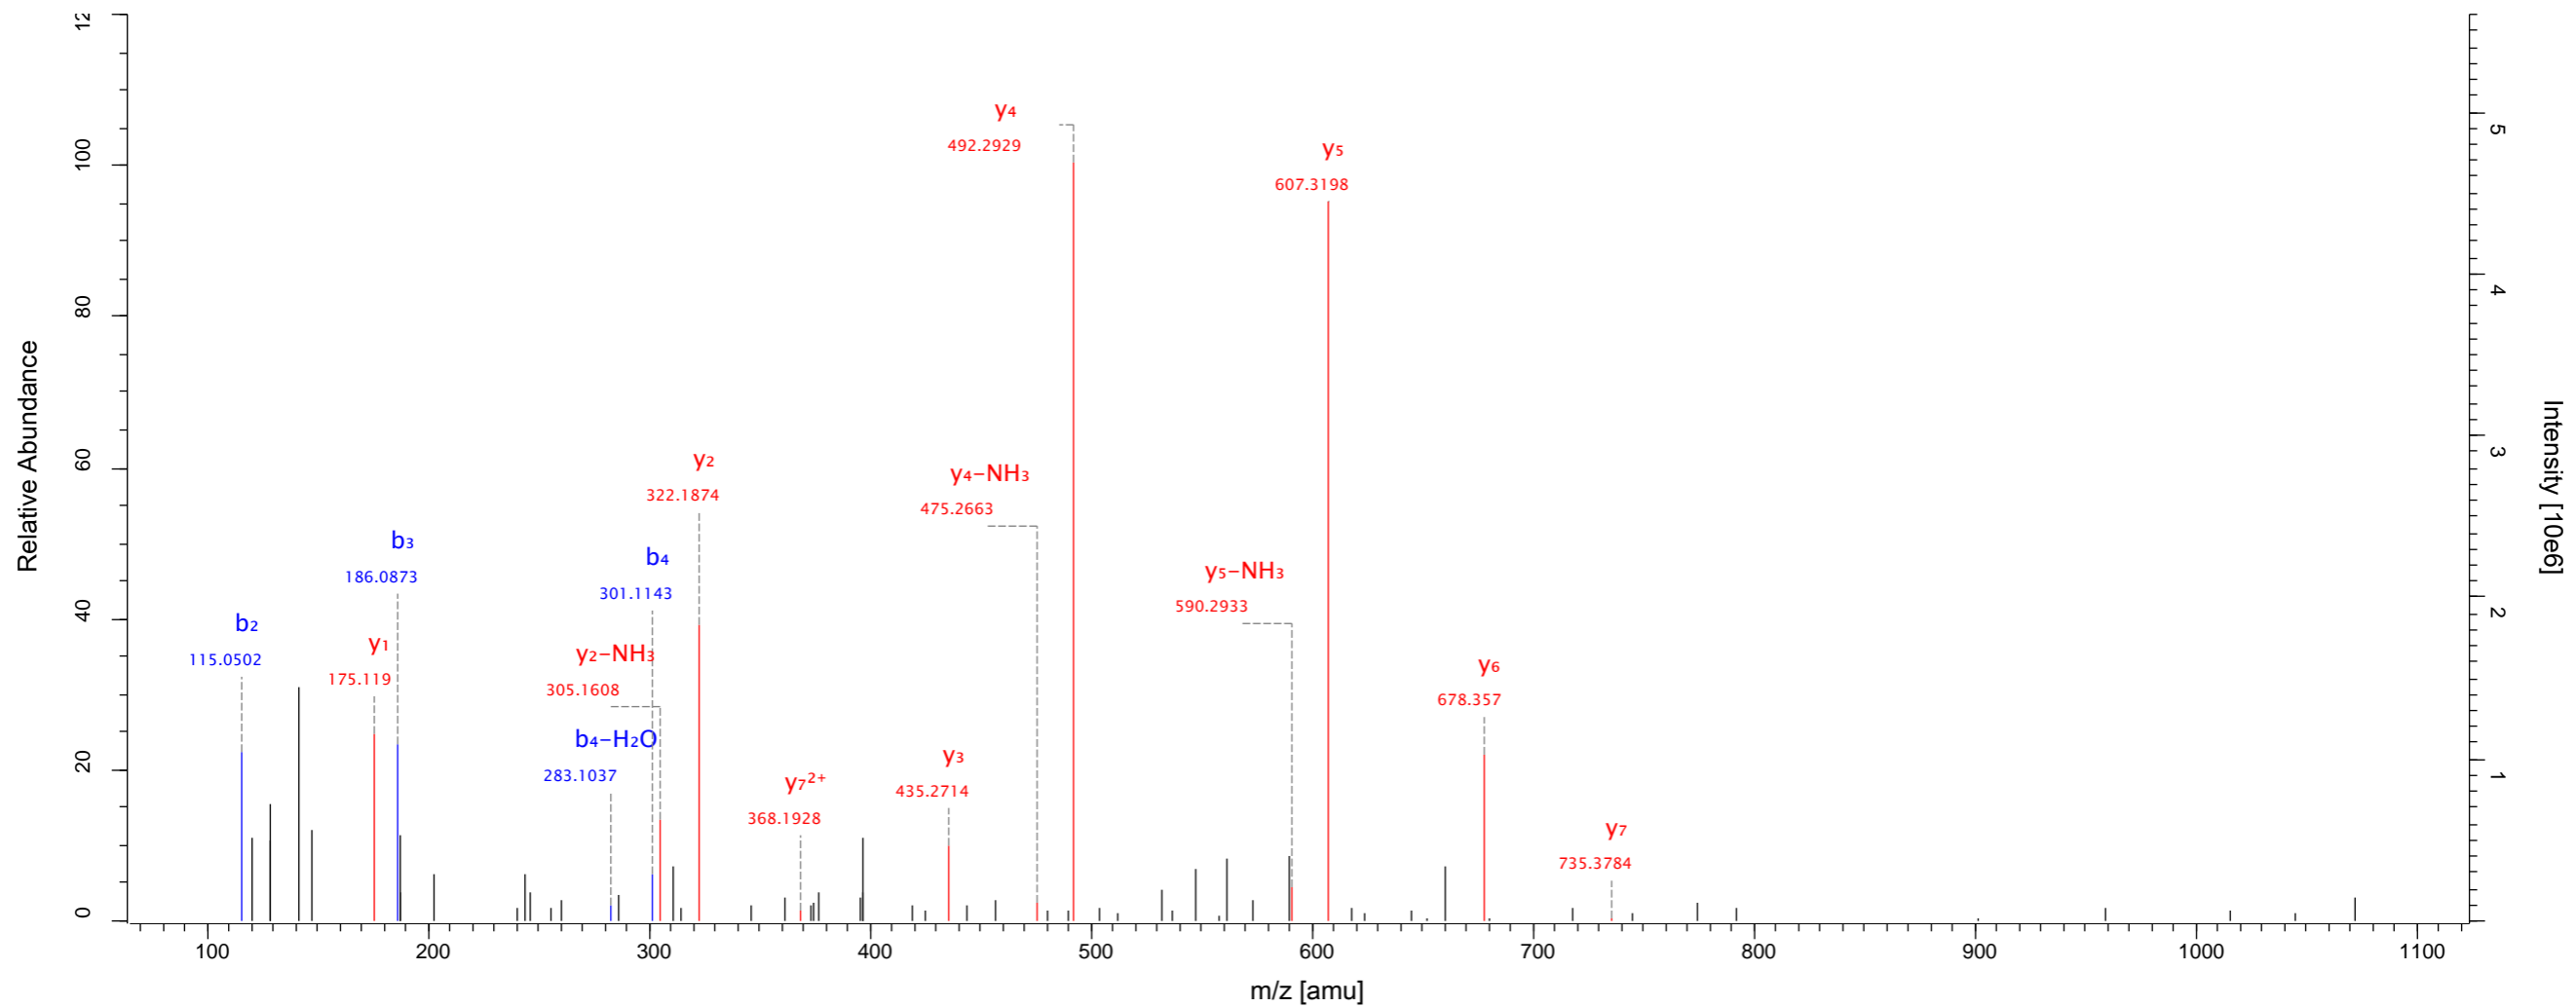

Raw file: 20111212\_EXQ5\_AnMi\_QC\_HCMVp1\_26  
Scan number: 15937  
Protein: ORFL47W.iORF1 + NC\_006273.2[21305,21601]+ <unknown description>  
Peptide score: 61.58  
Method: FTMS; HCD

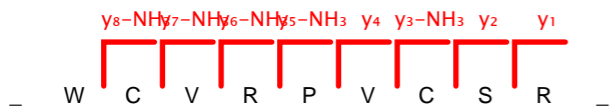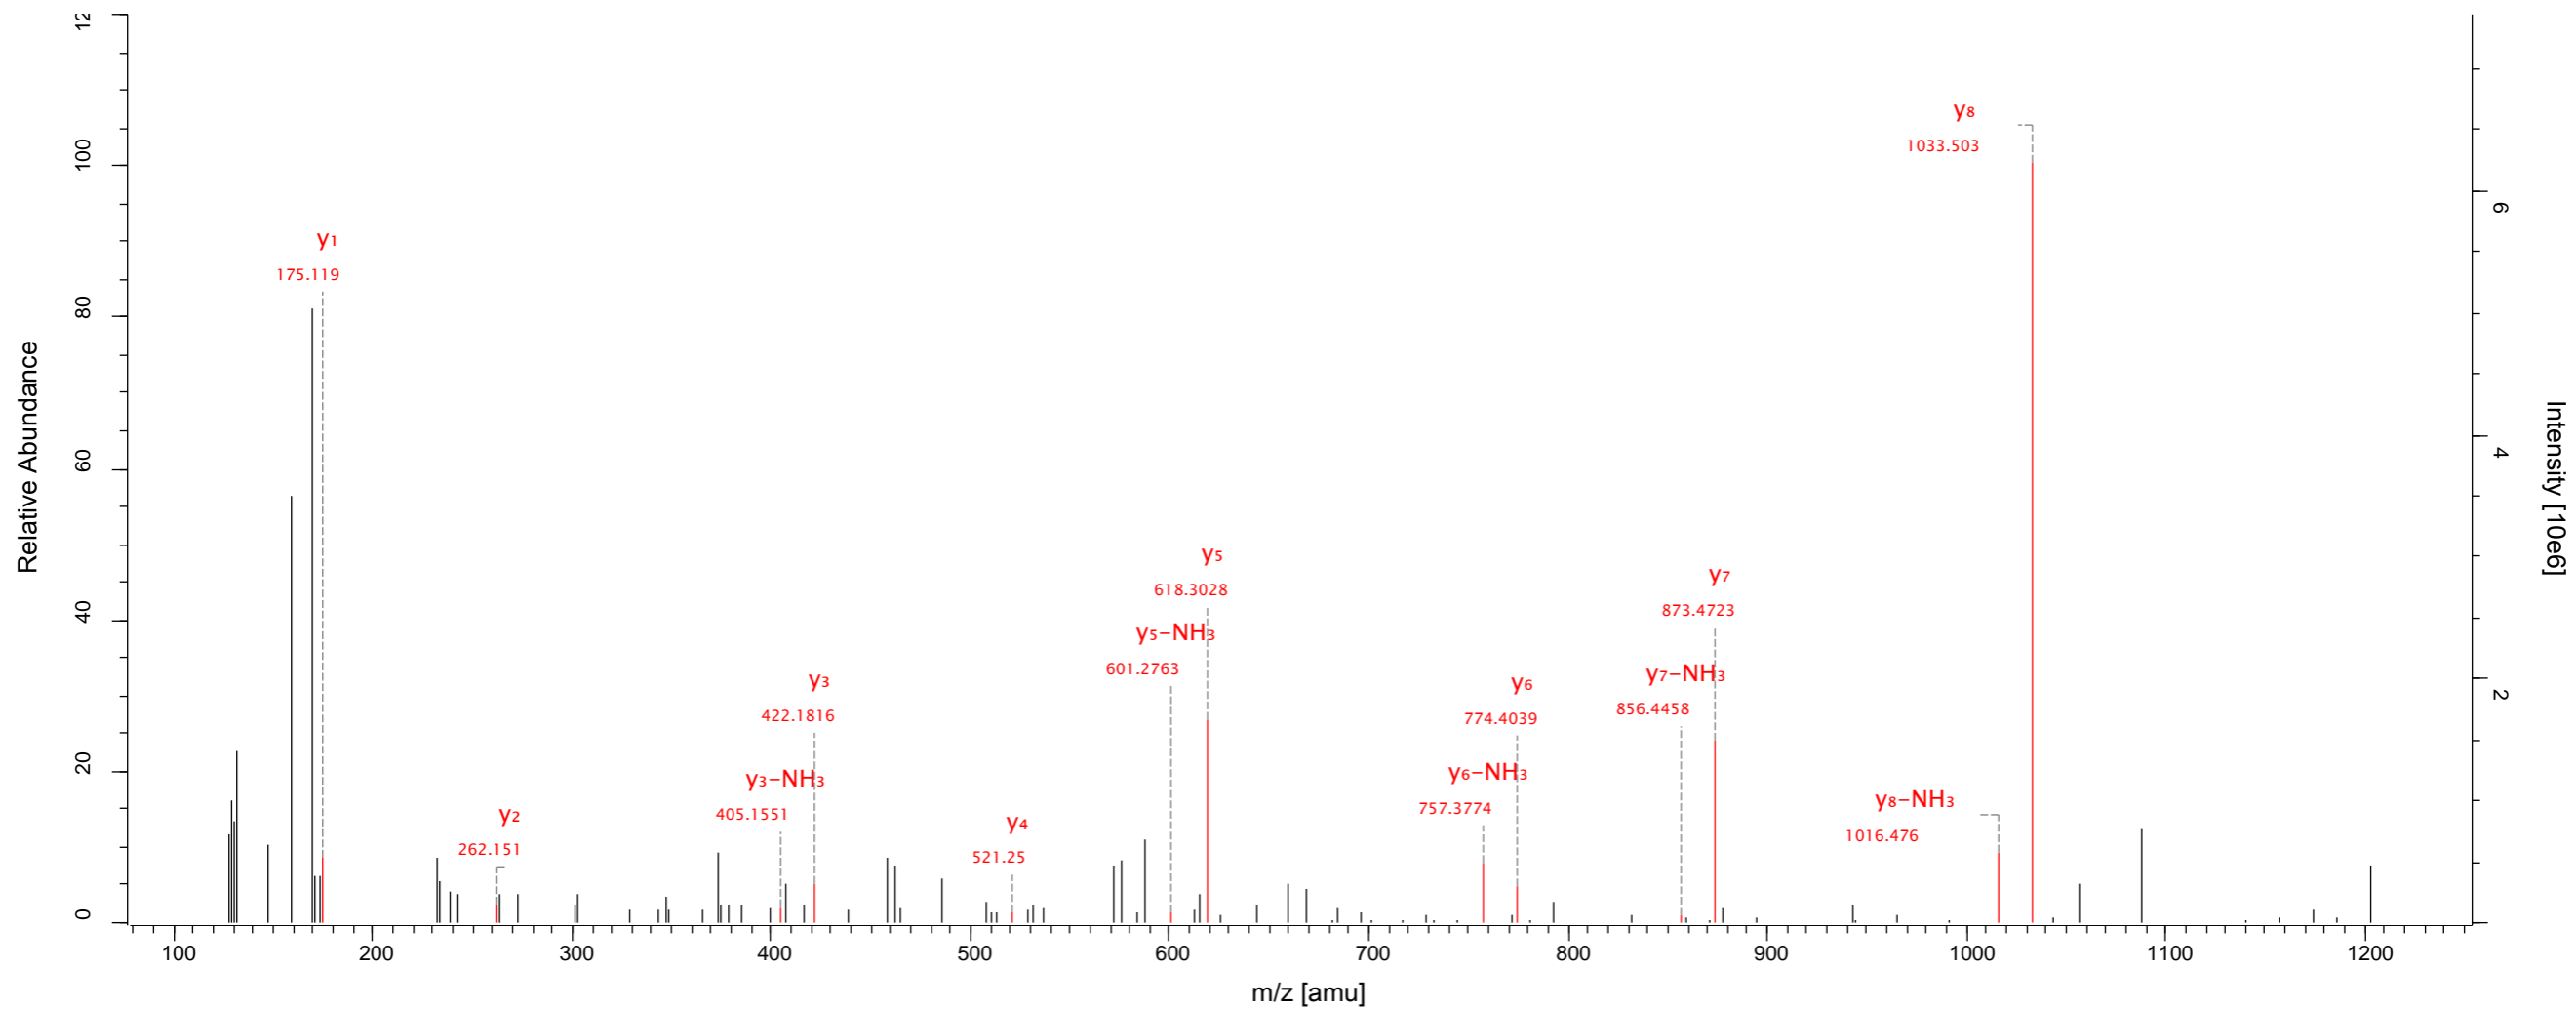

Raw file: 20111212\_EXQ5\_AnMi\_QC\_HCMVp1\_26  
Scan number: 16732  
Protein: ORFL271C.iORF1 - NC\_006273.2[176607,176858]- <unknown description>  
Peptide score: 101.25  
Method: FTMS; HCD

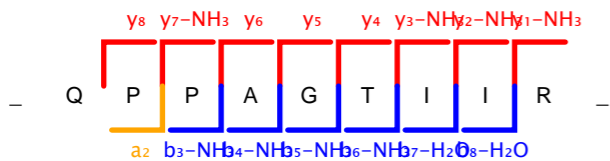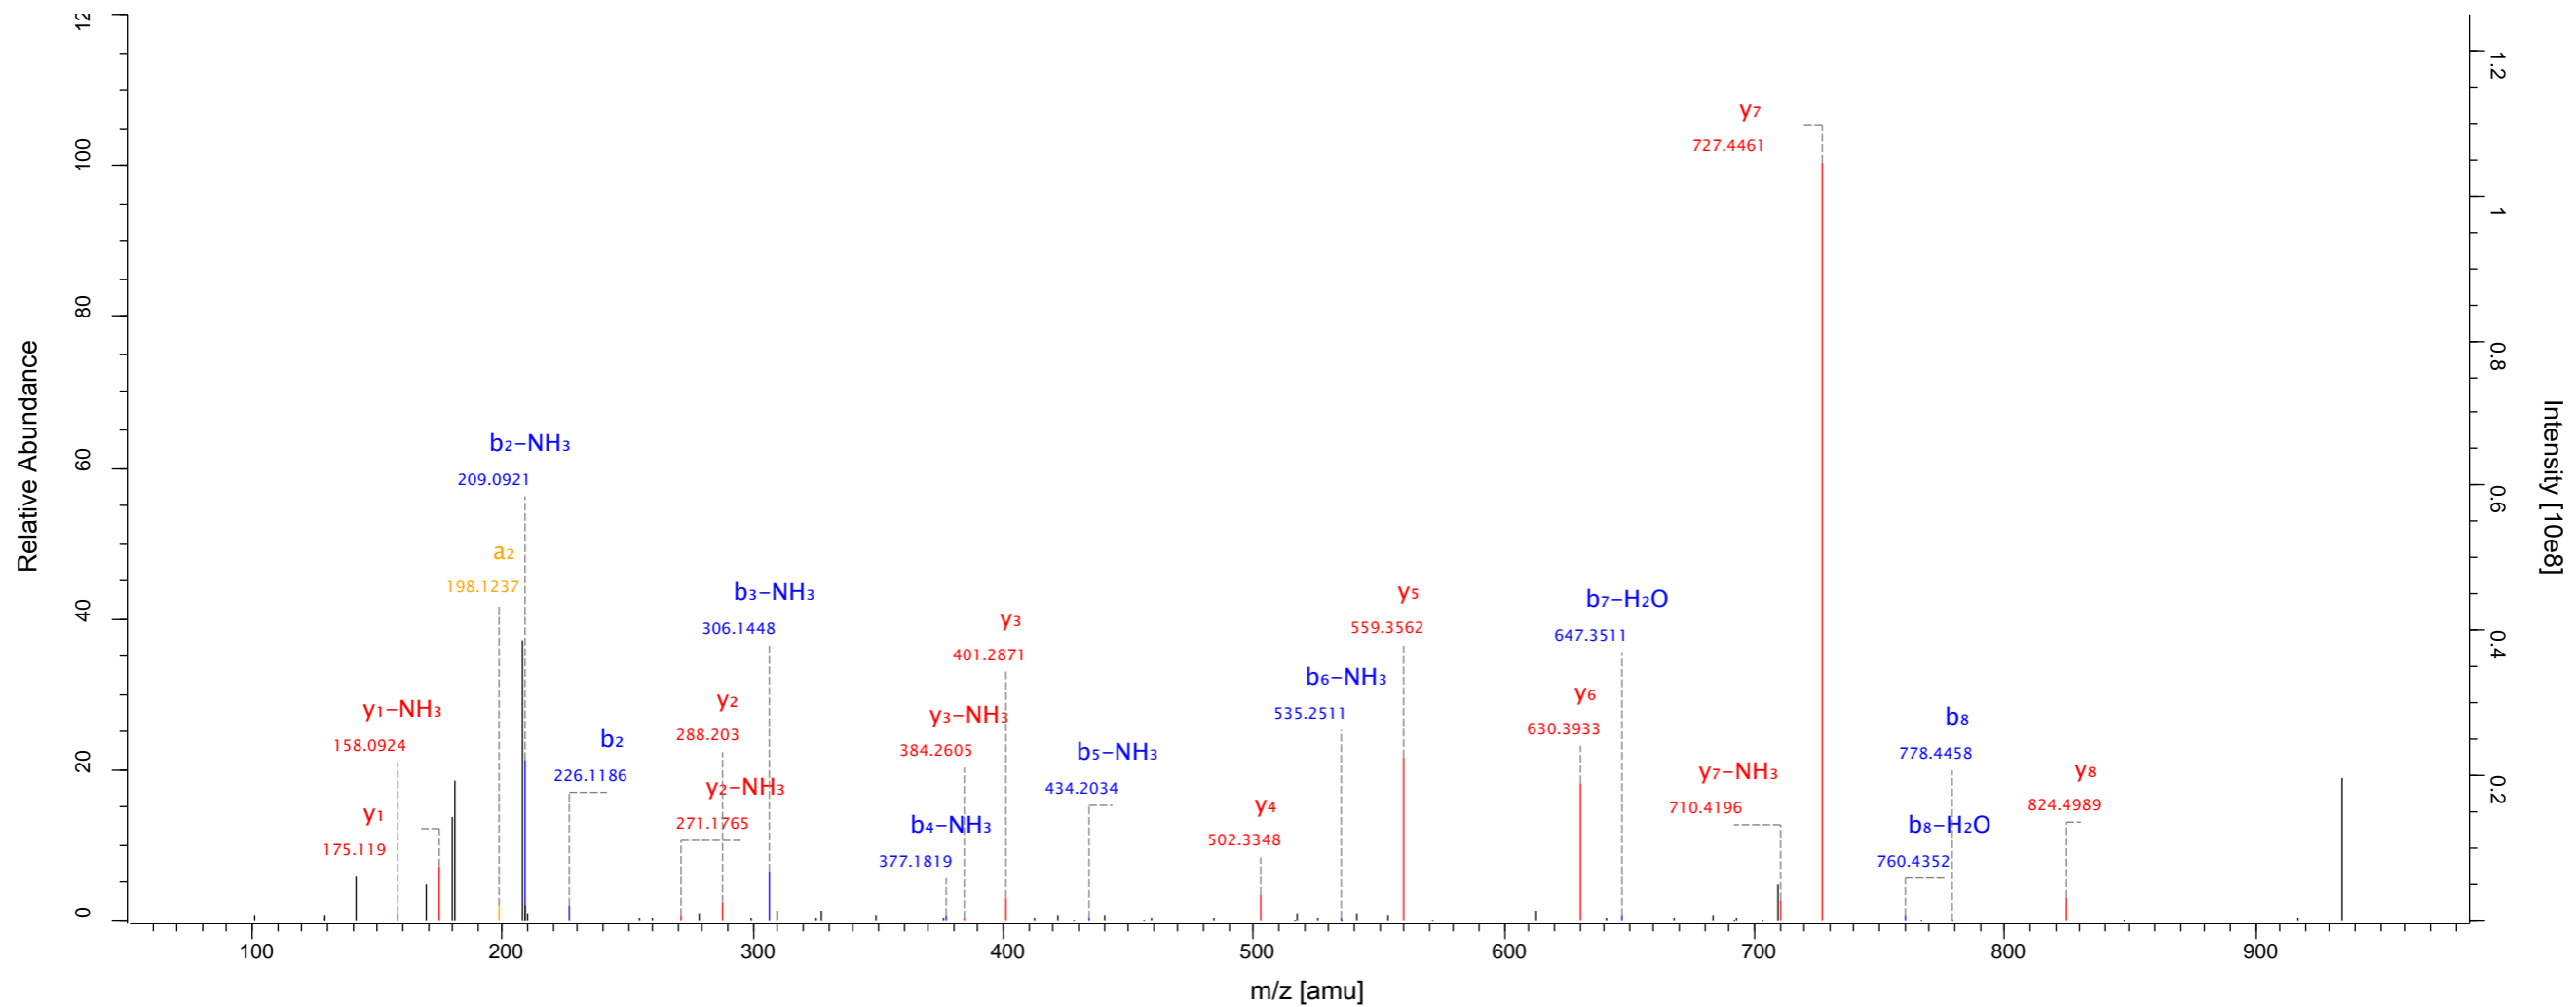



Raw file: 20111212\_EXQ5\_AnMi\_QC\_HCMVp1\_26  
Scan number: 16867  
Protein: ORFS343C.iORF1 - NC\_006273.2[210869,211213]- <unknown description>  
Peptide score: 71.22  
Method: FTMS; HCD

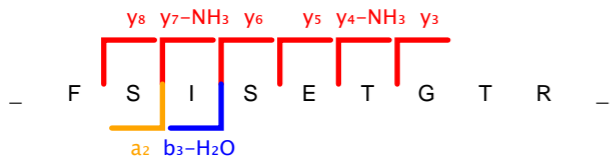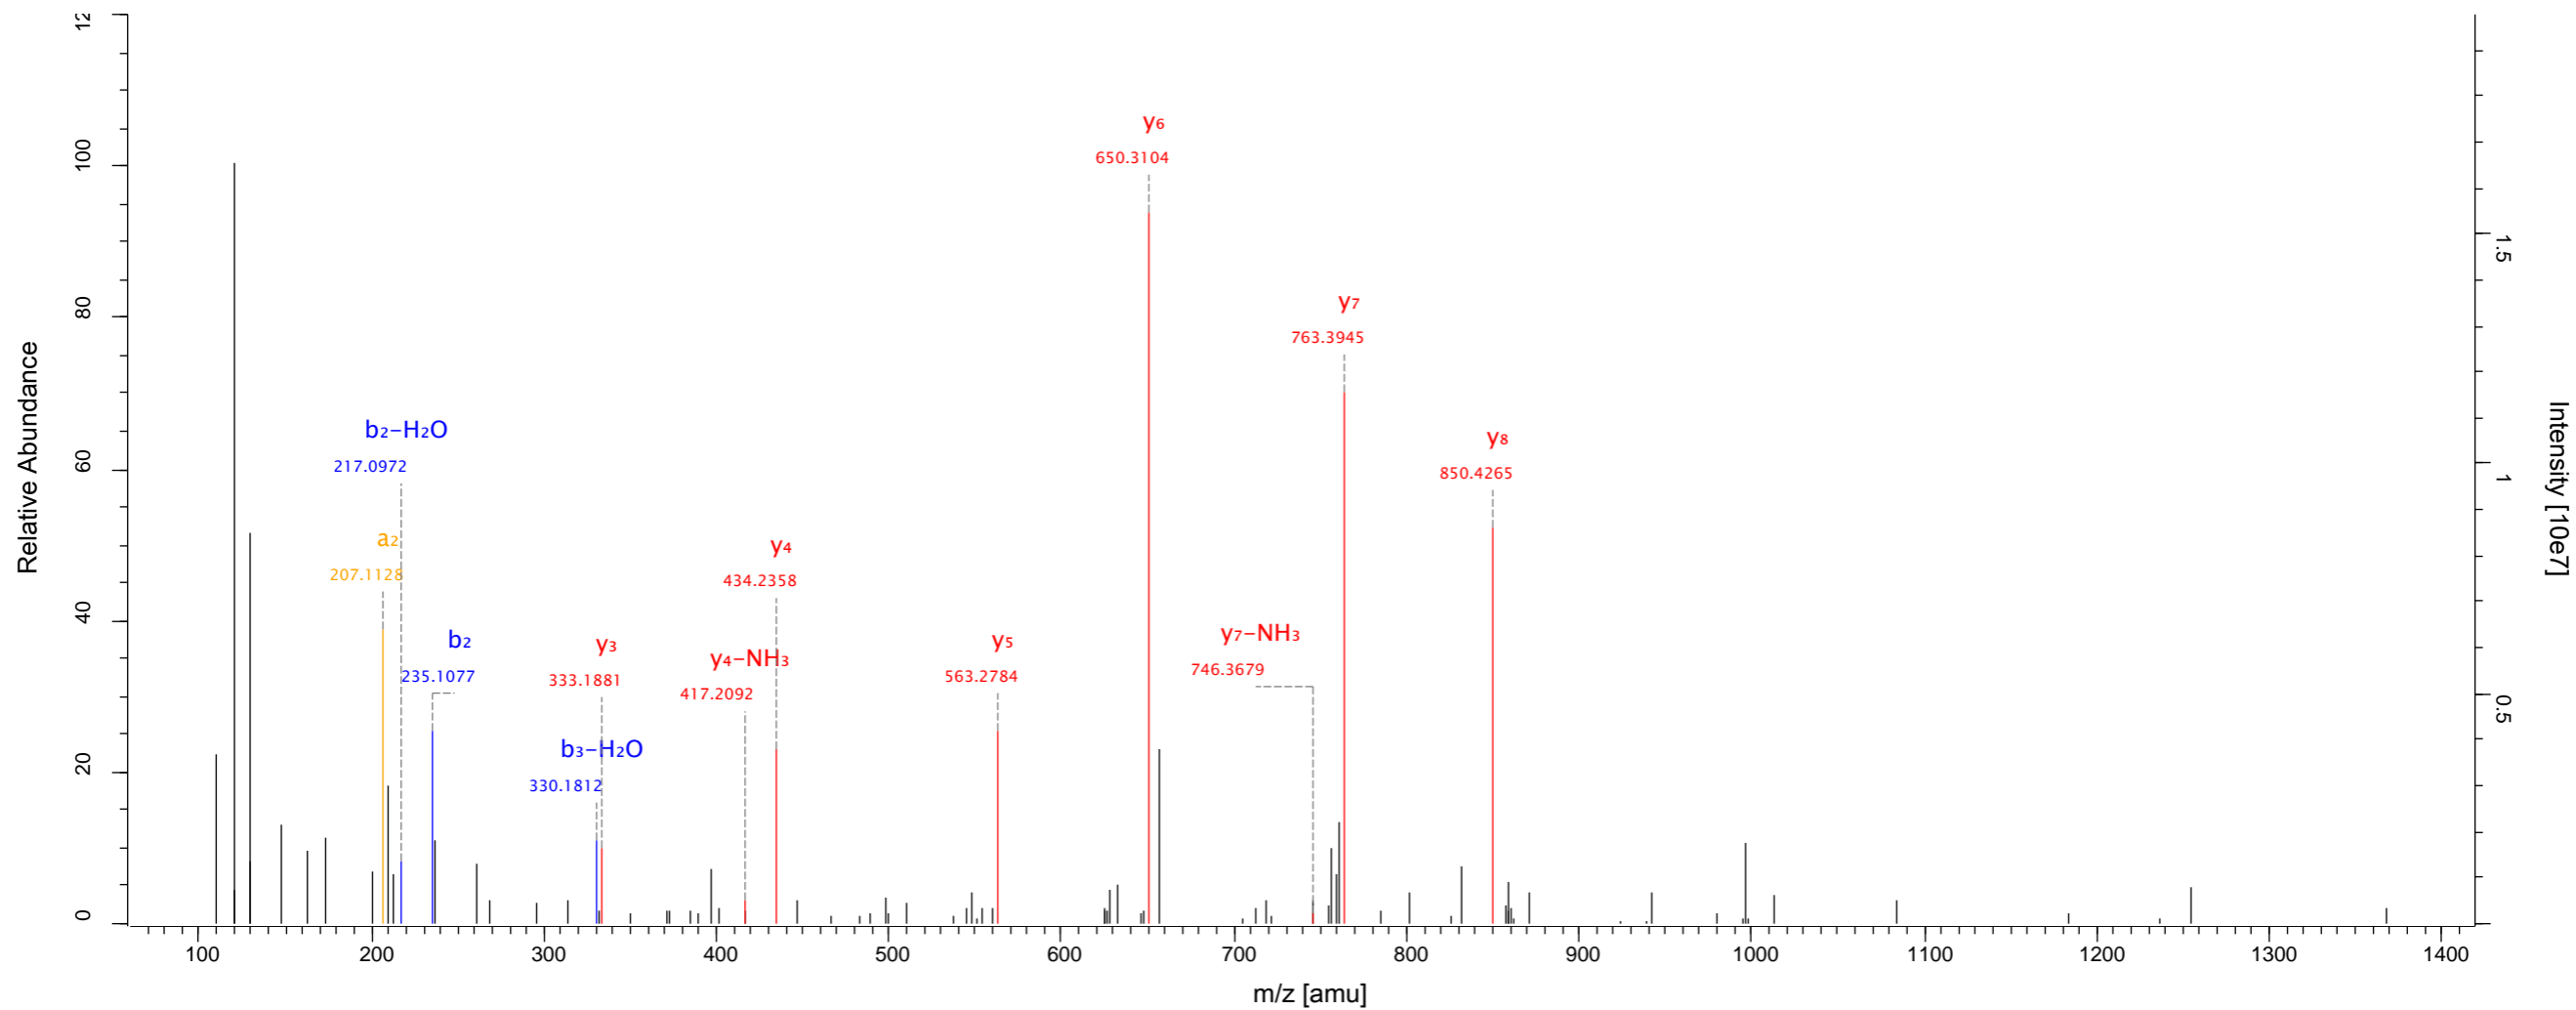

Raw file: 20111212\_EXQ5\_AnMi\_QC\_HCMVp11\_26  
 Scan number: 17553  
 Protein: ORFL185C - NC\_006273.2[111134,111490]- <unknown description>; ORFL184C.iORF3 - NC\_006273.2[111134,111379]- <unknown description>  
 Peptide score: 85.64  
 Method: FTMS; HCD

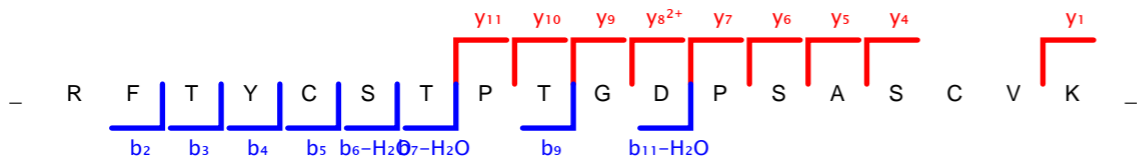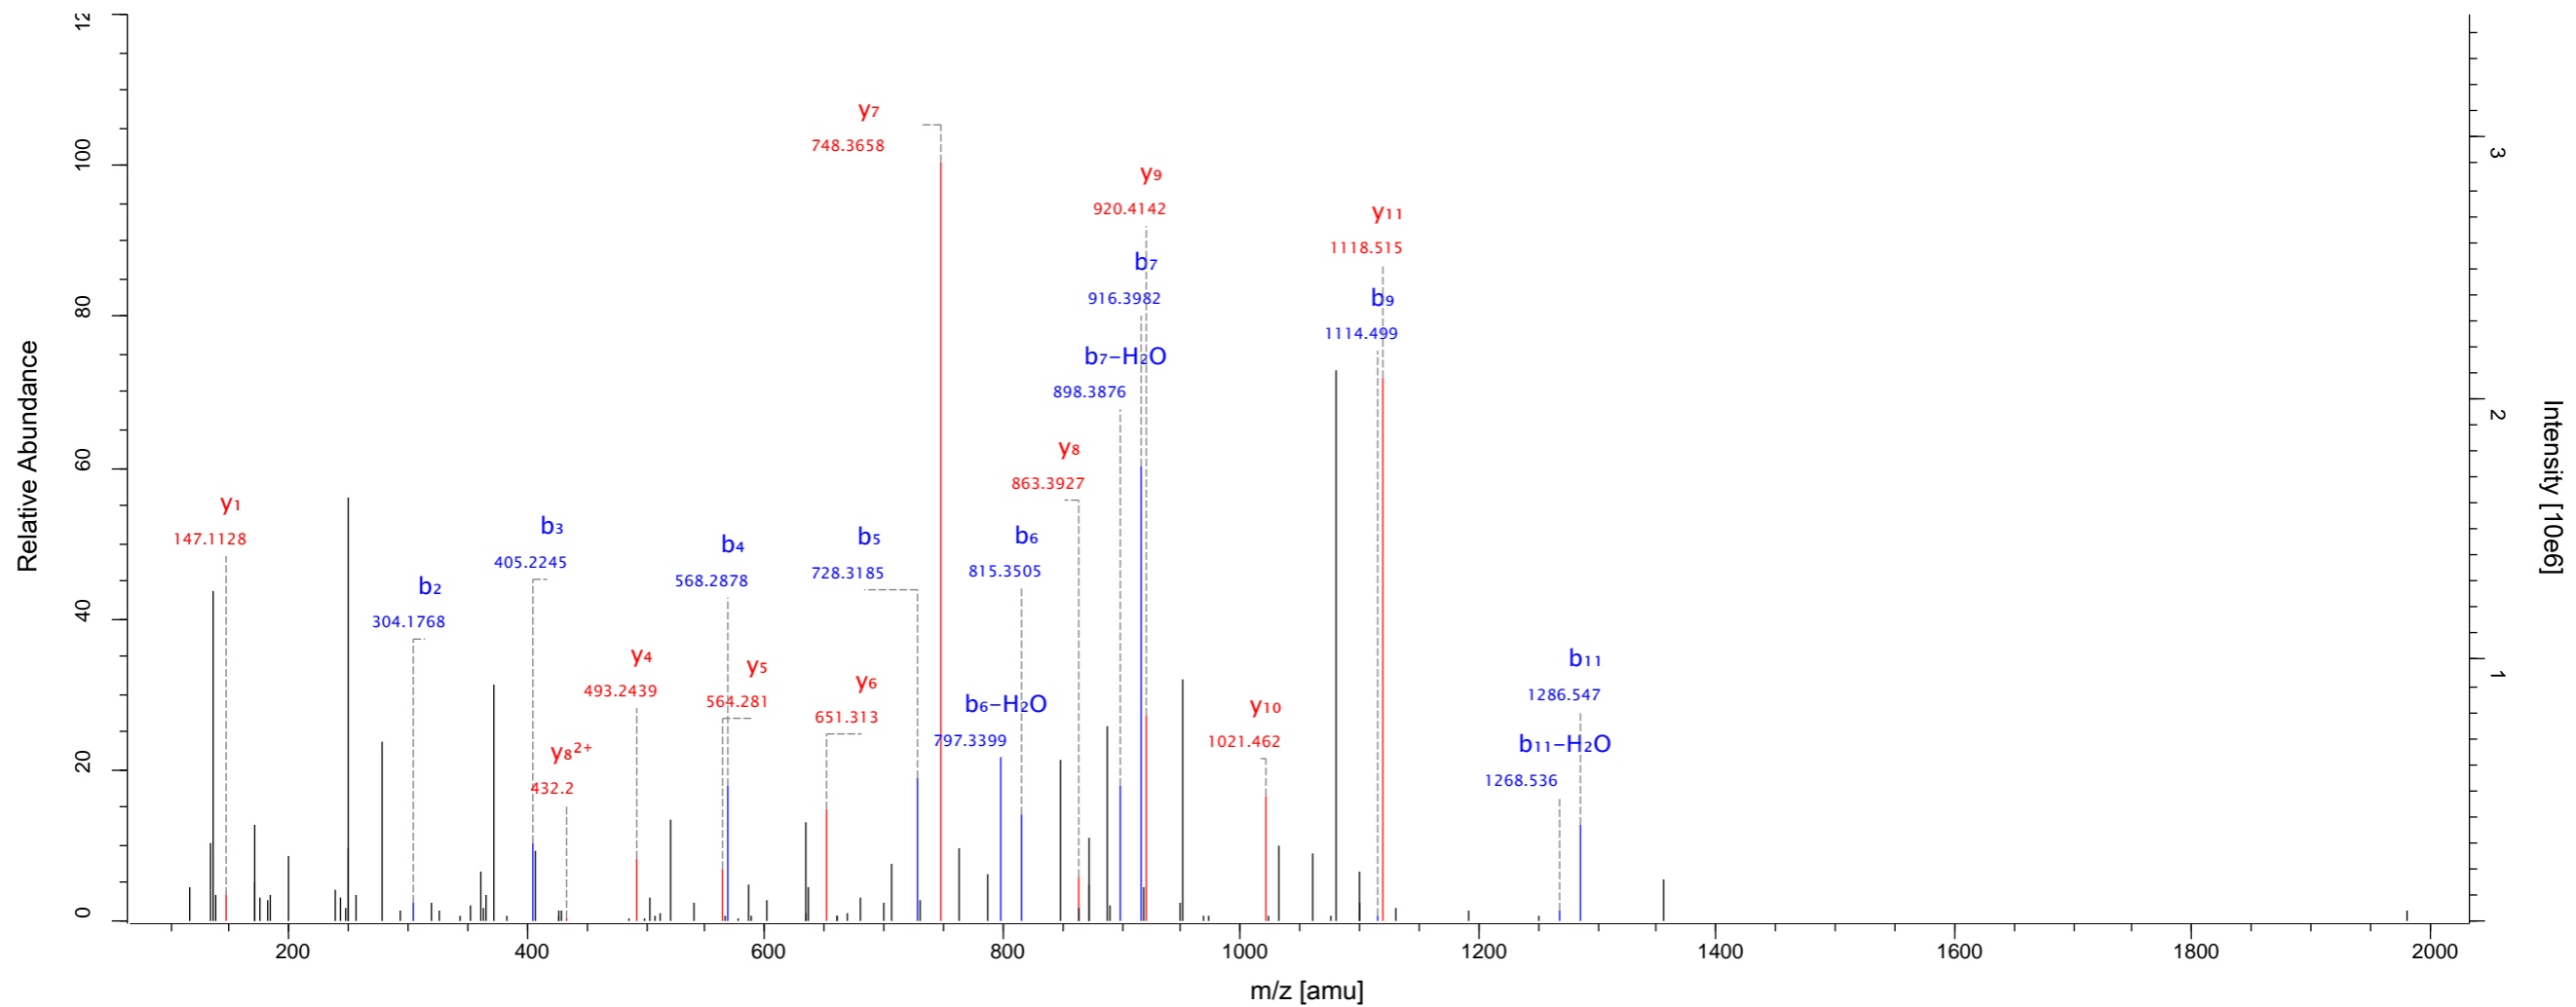

Raw file: 20111212\_EXQ5\_AnMi\_QC\_HCMVp1\_26  
Scan number: 17637  
Protein: ORFL137W.IORF1 + NC\_006273.2[75299,75529]+ <unknown description>  
Peptide score: 90.71  
Method: FTMS; HCD

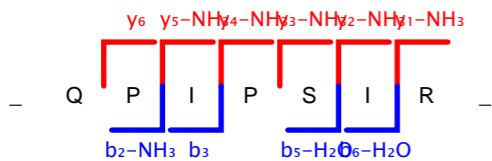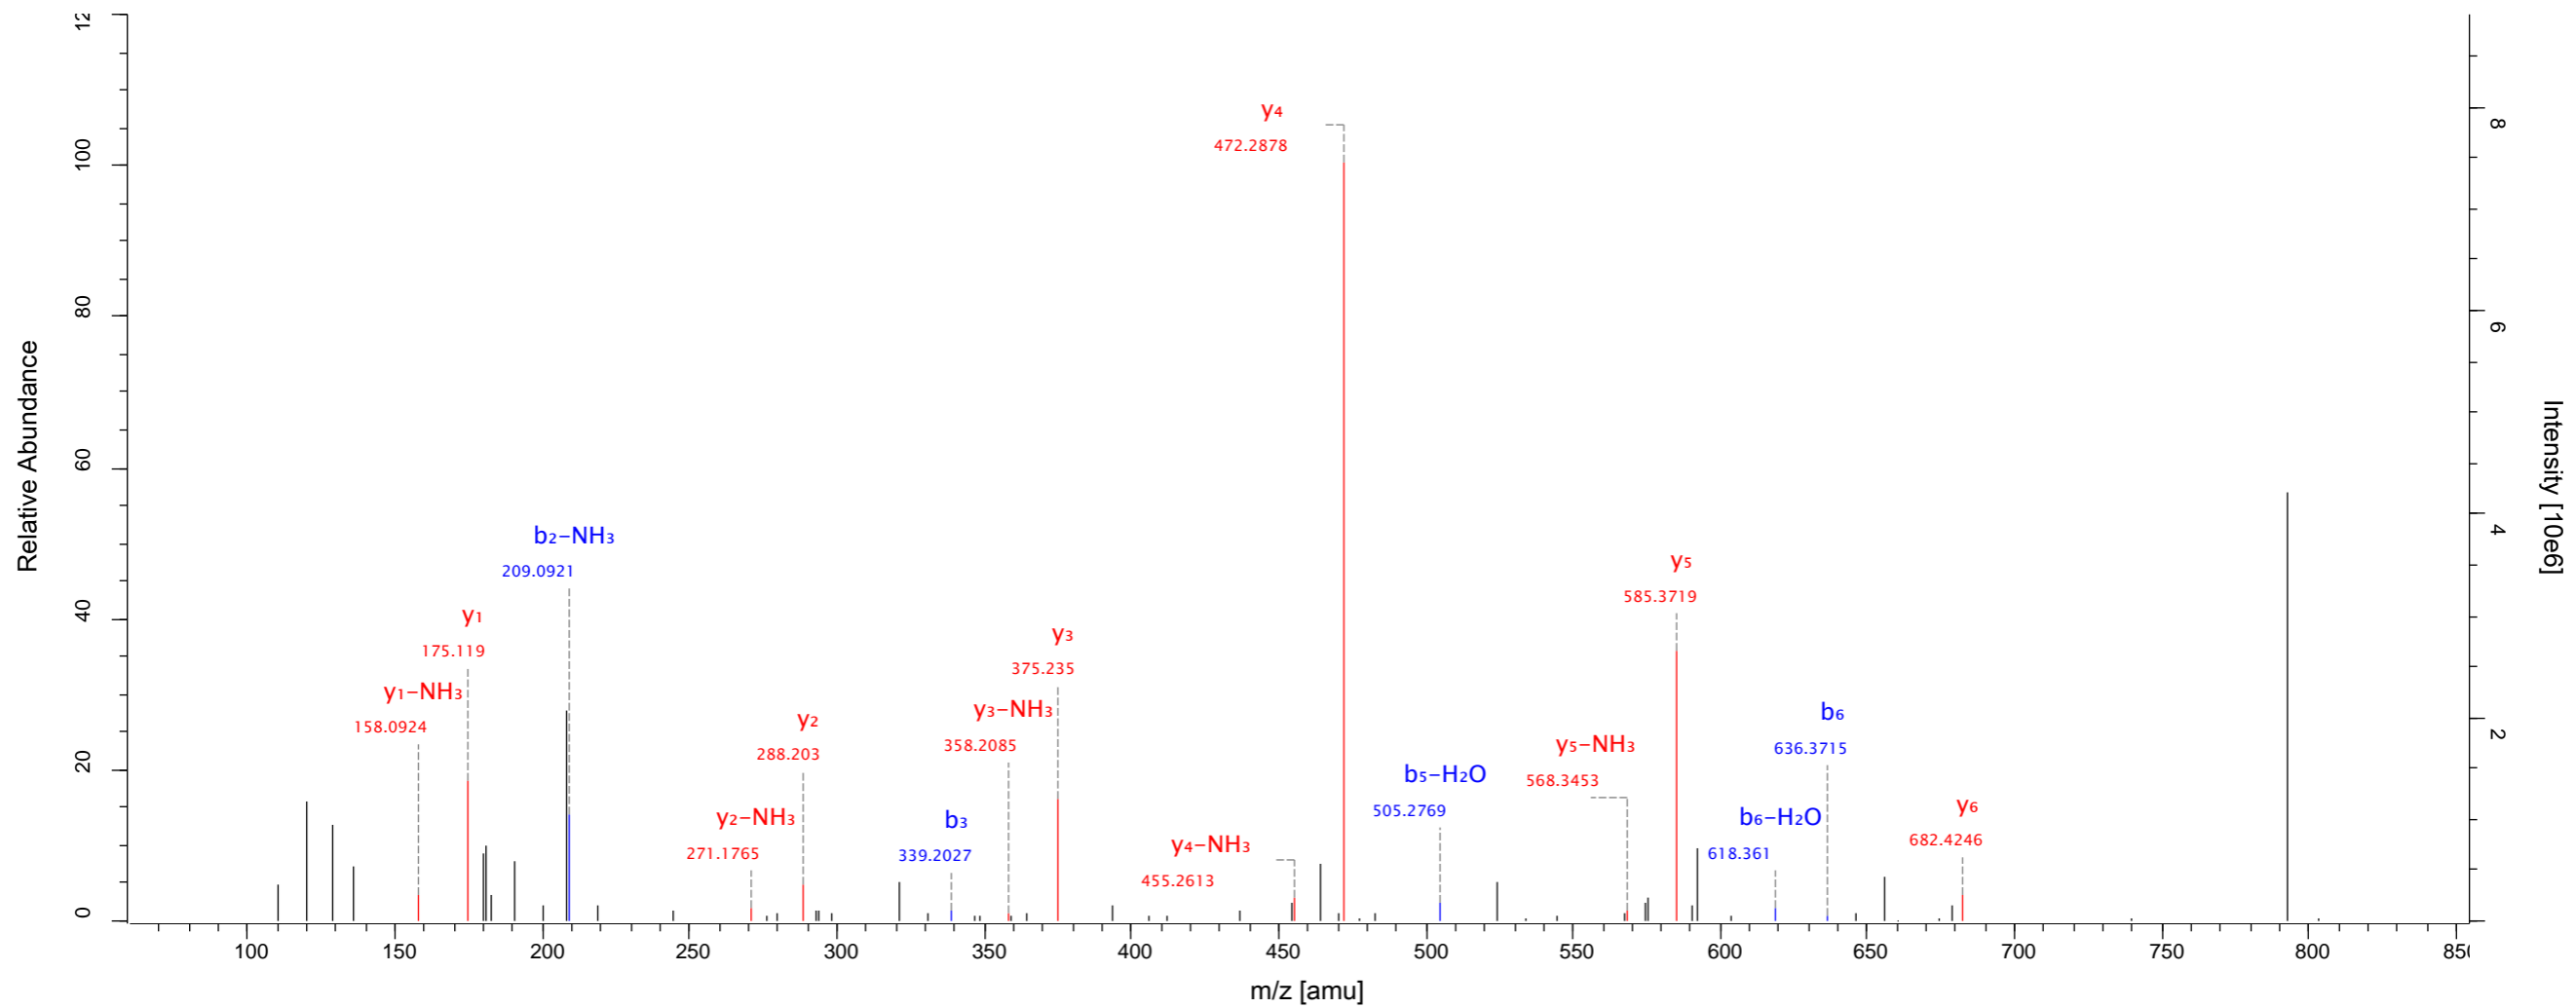

Raw file: 20111212\_EXQ5\_AnMi\_QC\_HCMVp1\_26  
 Scan number: 18964  
 Protein: ORFL294W.iORF1 + NC\_006273.2[183230,193441]+ <unknown description>; ORFL294W + NC\_006273.2[183230,193441]+ <unknown description>  
 Peptide score: 180.14  
 Method: FTMS; HCD

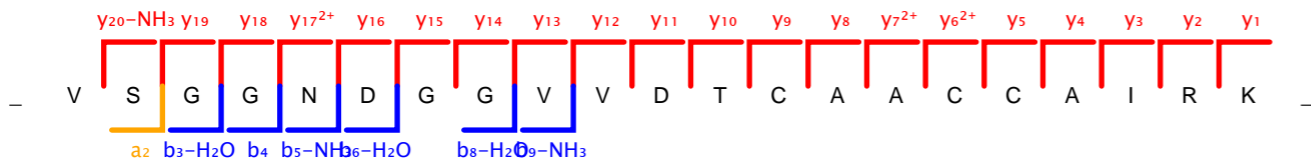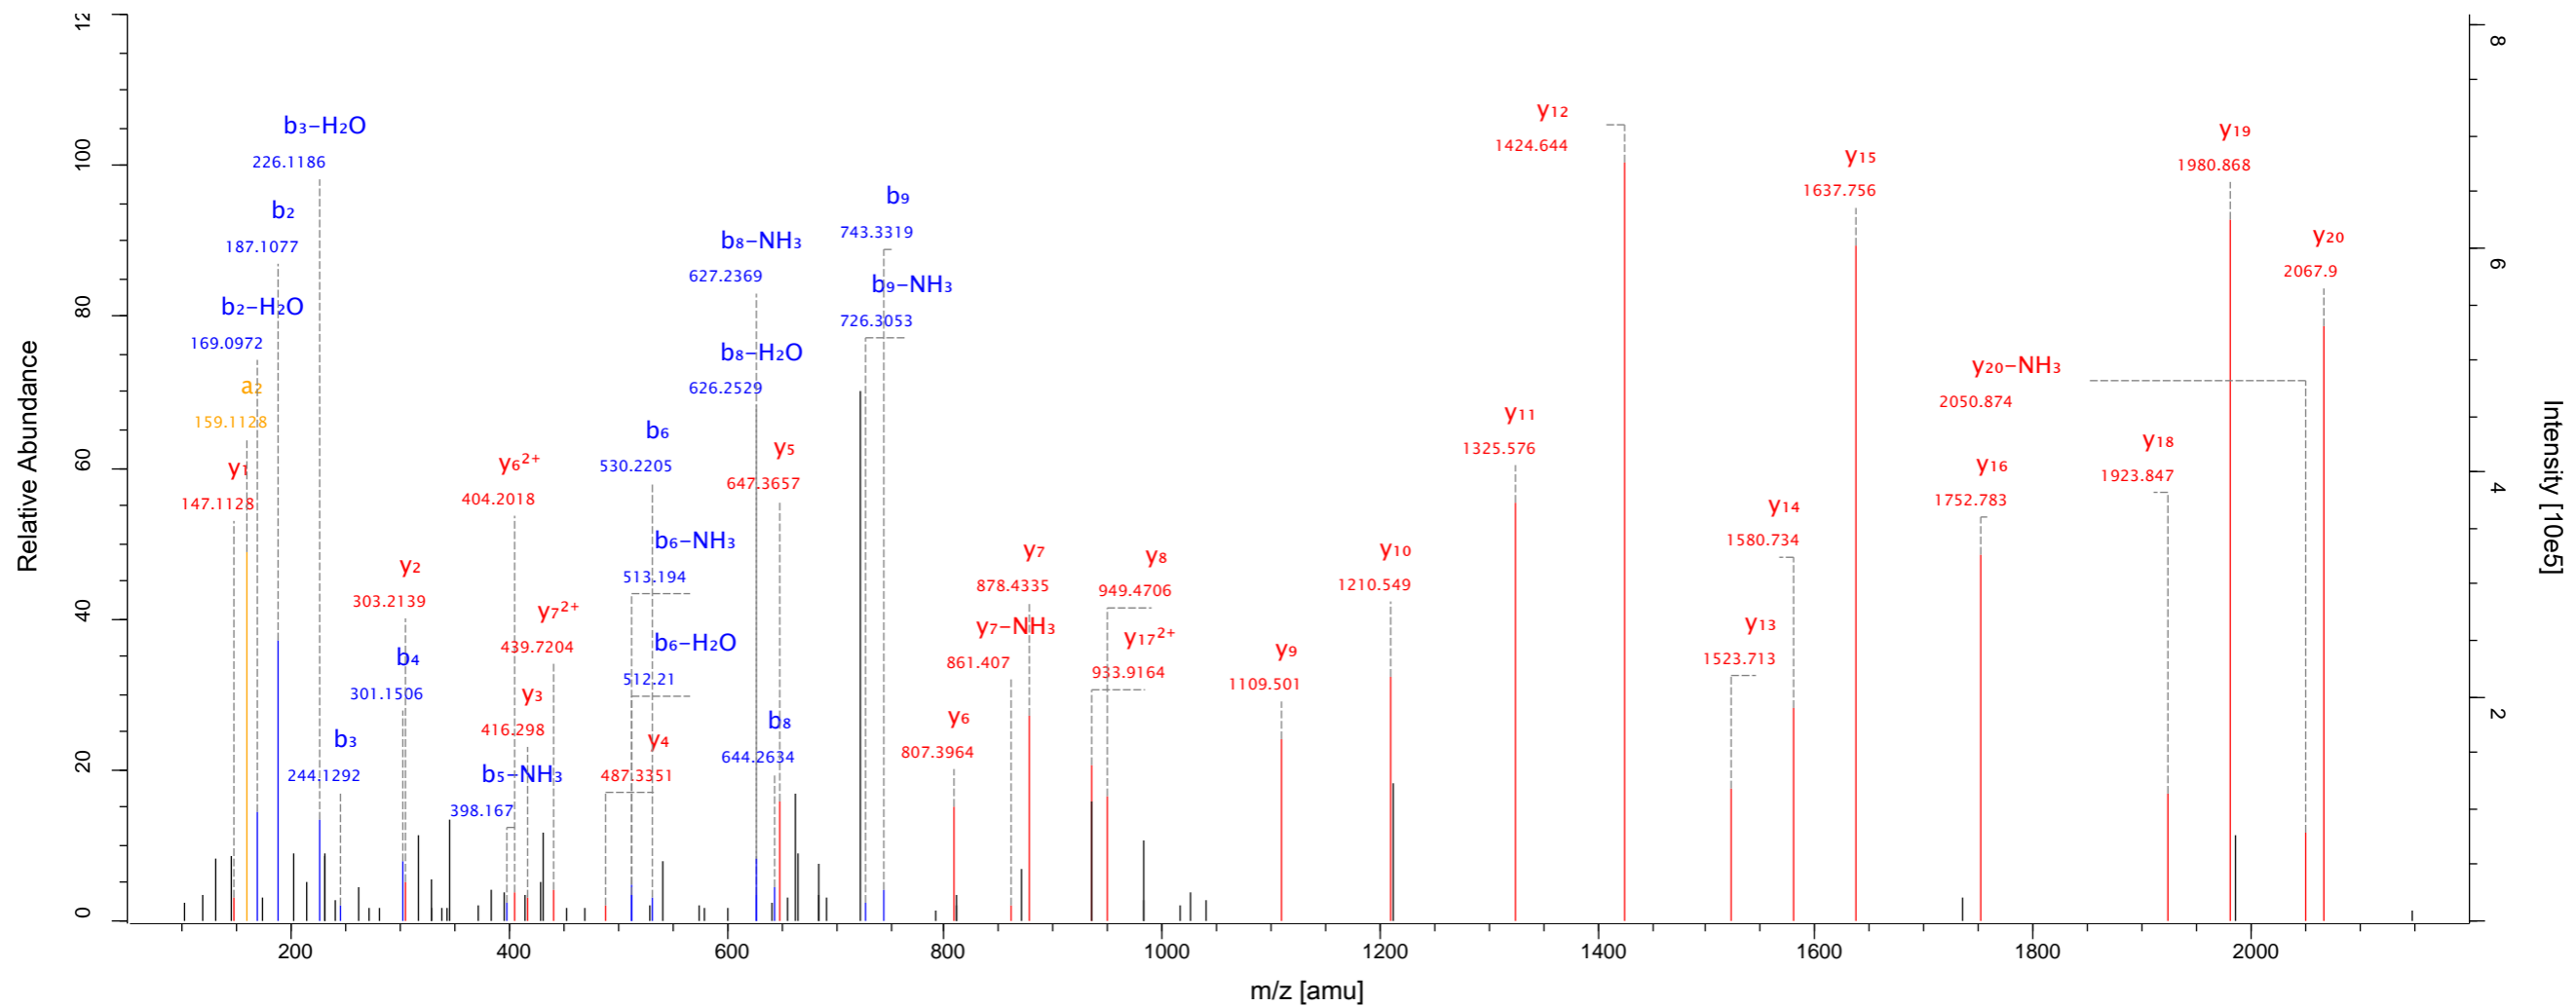

Raw file: 20111212\_EXQ5\_AnMi\_QC\_HCMVp1\_26  
Scan number: 19350  
Protein: ORFL47W.iORF1 + NC\_006273.2[21305,21601]+ <unknown description>  
Peptide score: 122.34  
Method: FTMS; HCD

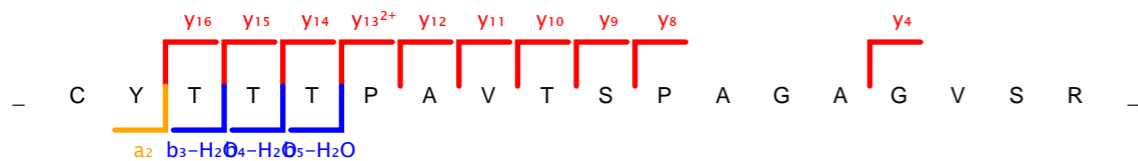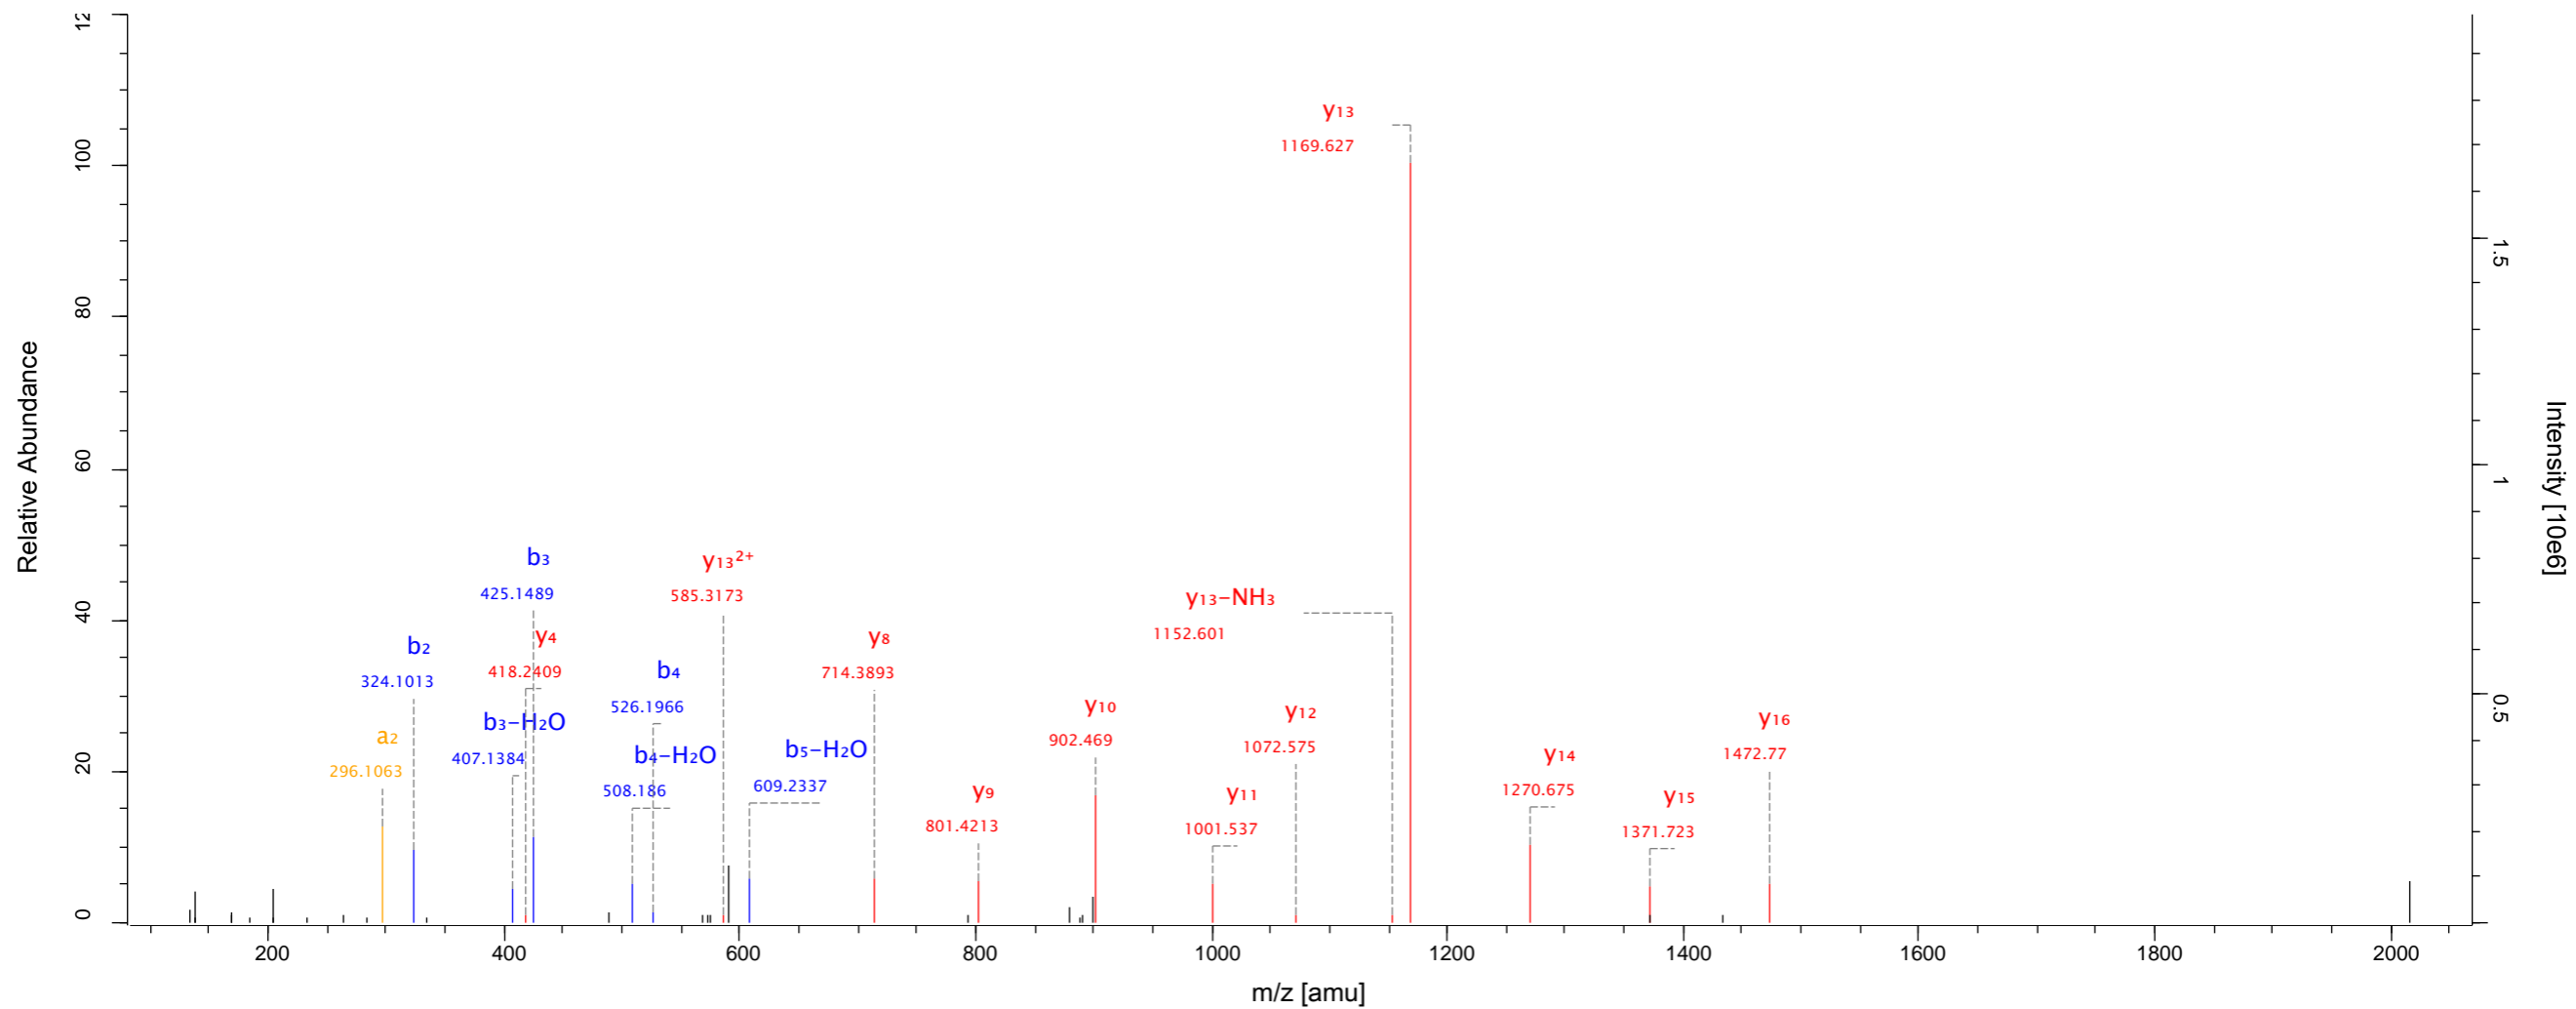

Raw file: 20111212\_EXQ5\_AnMi\_QC\_HCMVp1\_26  
 Scan number: 19625  
 Protein: ORFL185C - NC\_006273.2[111134,111490]- <unknown description>; ORFL184C.iORF3 - NC\_006273.2[111134,111379]- <unknown description>  
 Peptide score: 109.83  
 Method: FTMS; HCD

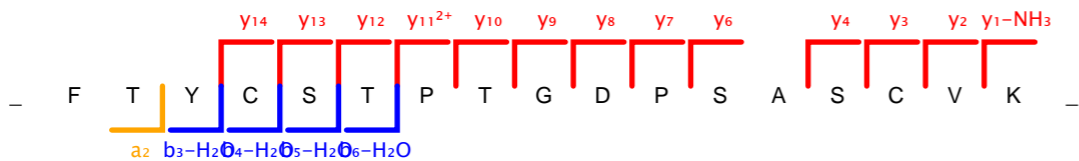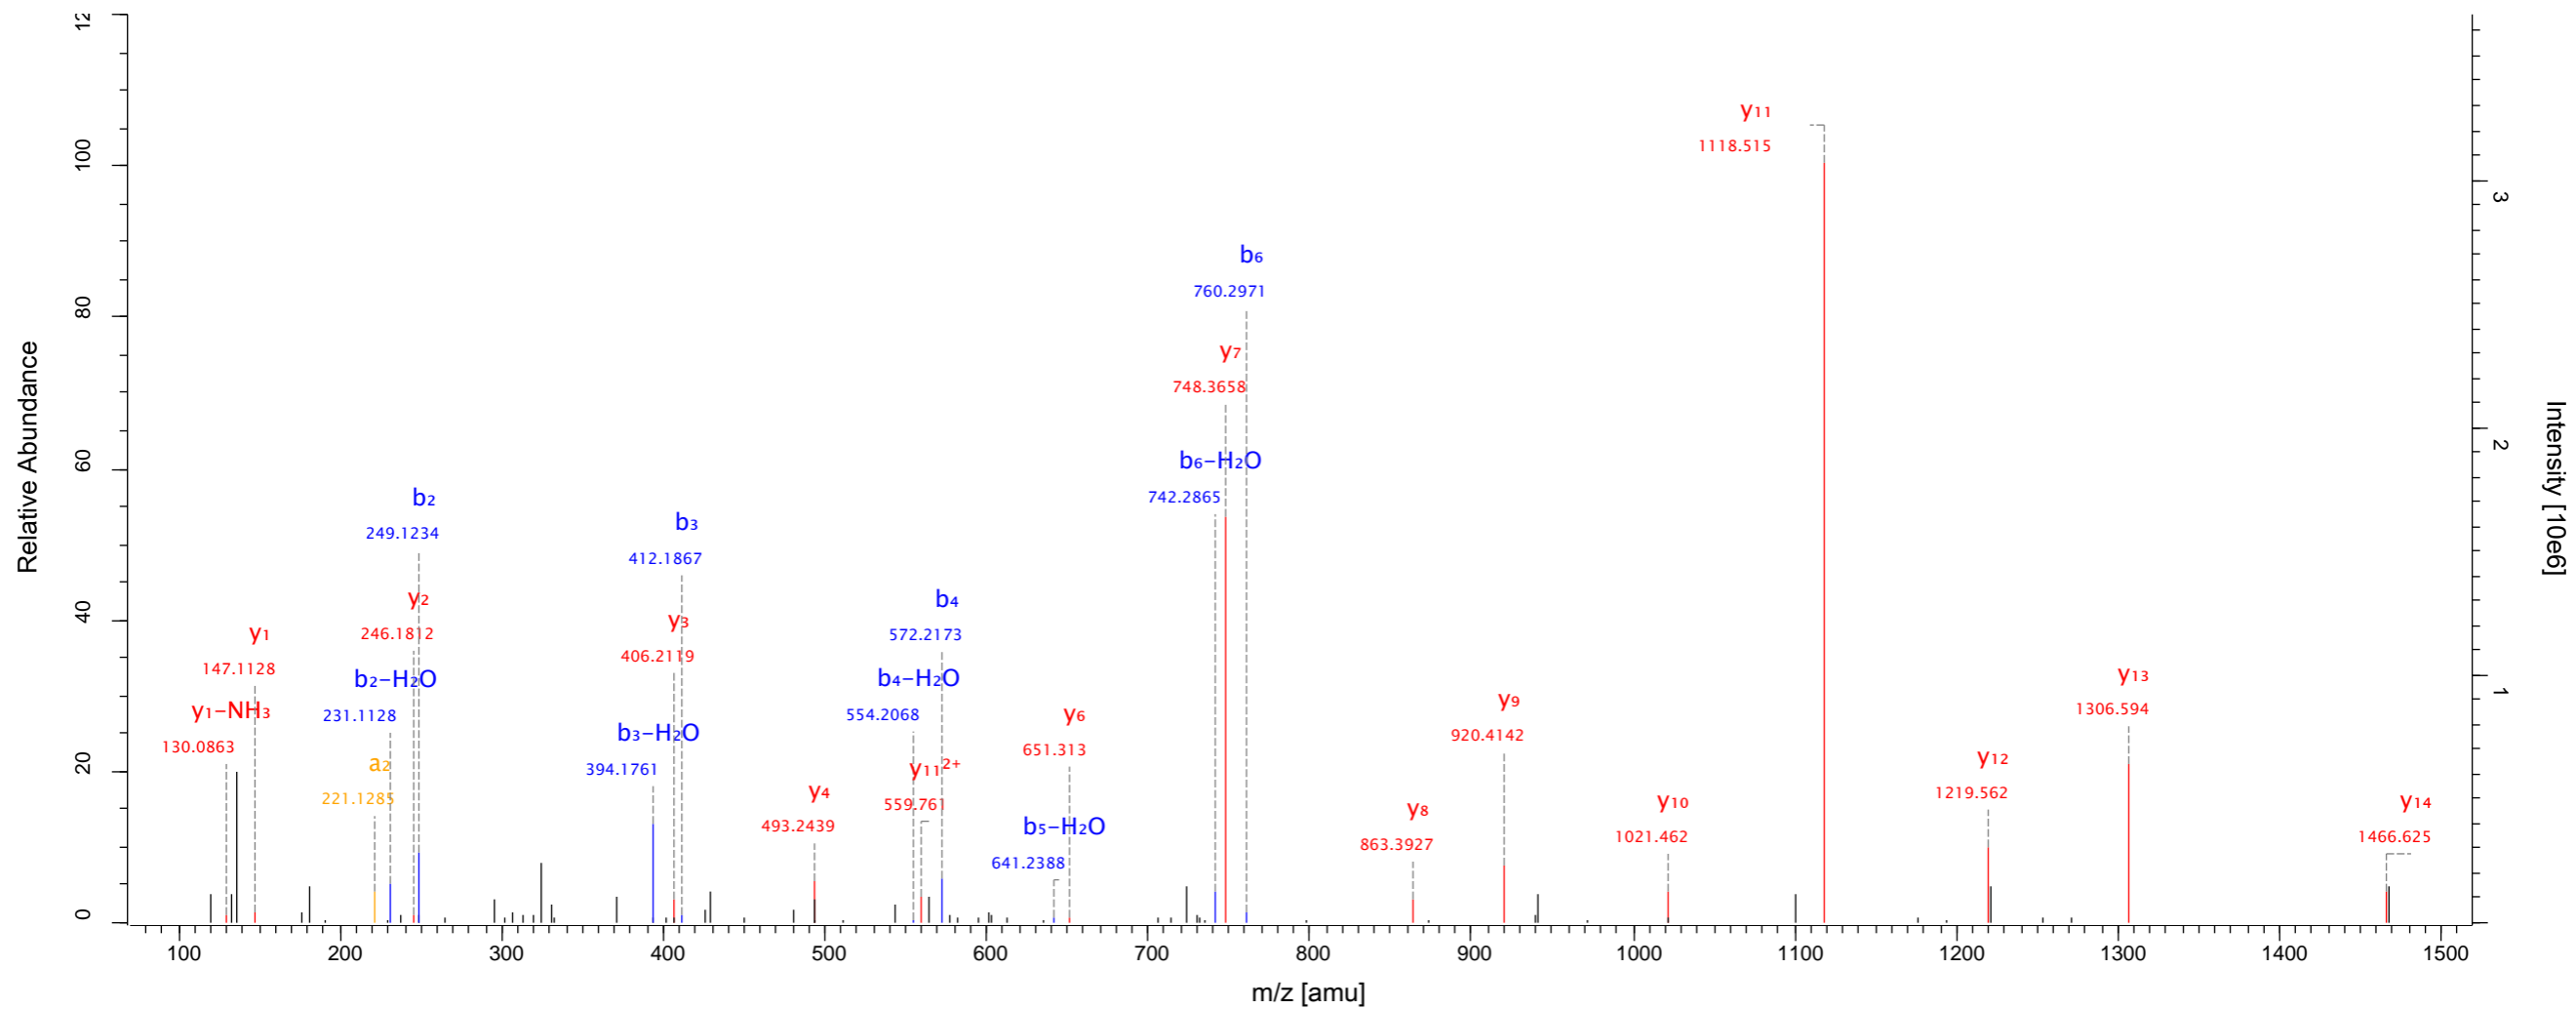

Raw file: 20111212\_EXQ5\_AnMi\_QC\_HCMVp11\_26  
 Scan number: 19739  
 Protein: ORFL294W.iORF1 + NC\_006273.2[183230,193441]+ <unknown description>; ORFL294W + NC\_006273.2[183230,193441]+ <unknown description>  
 Peptide score: 121.31  
 Method: FTMS; HCD

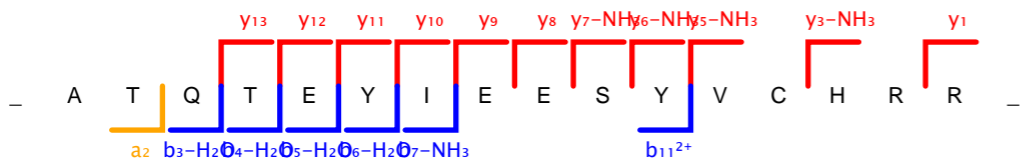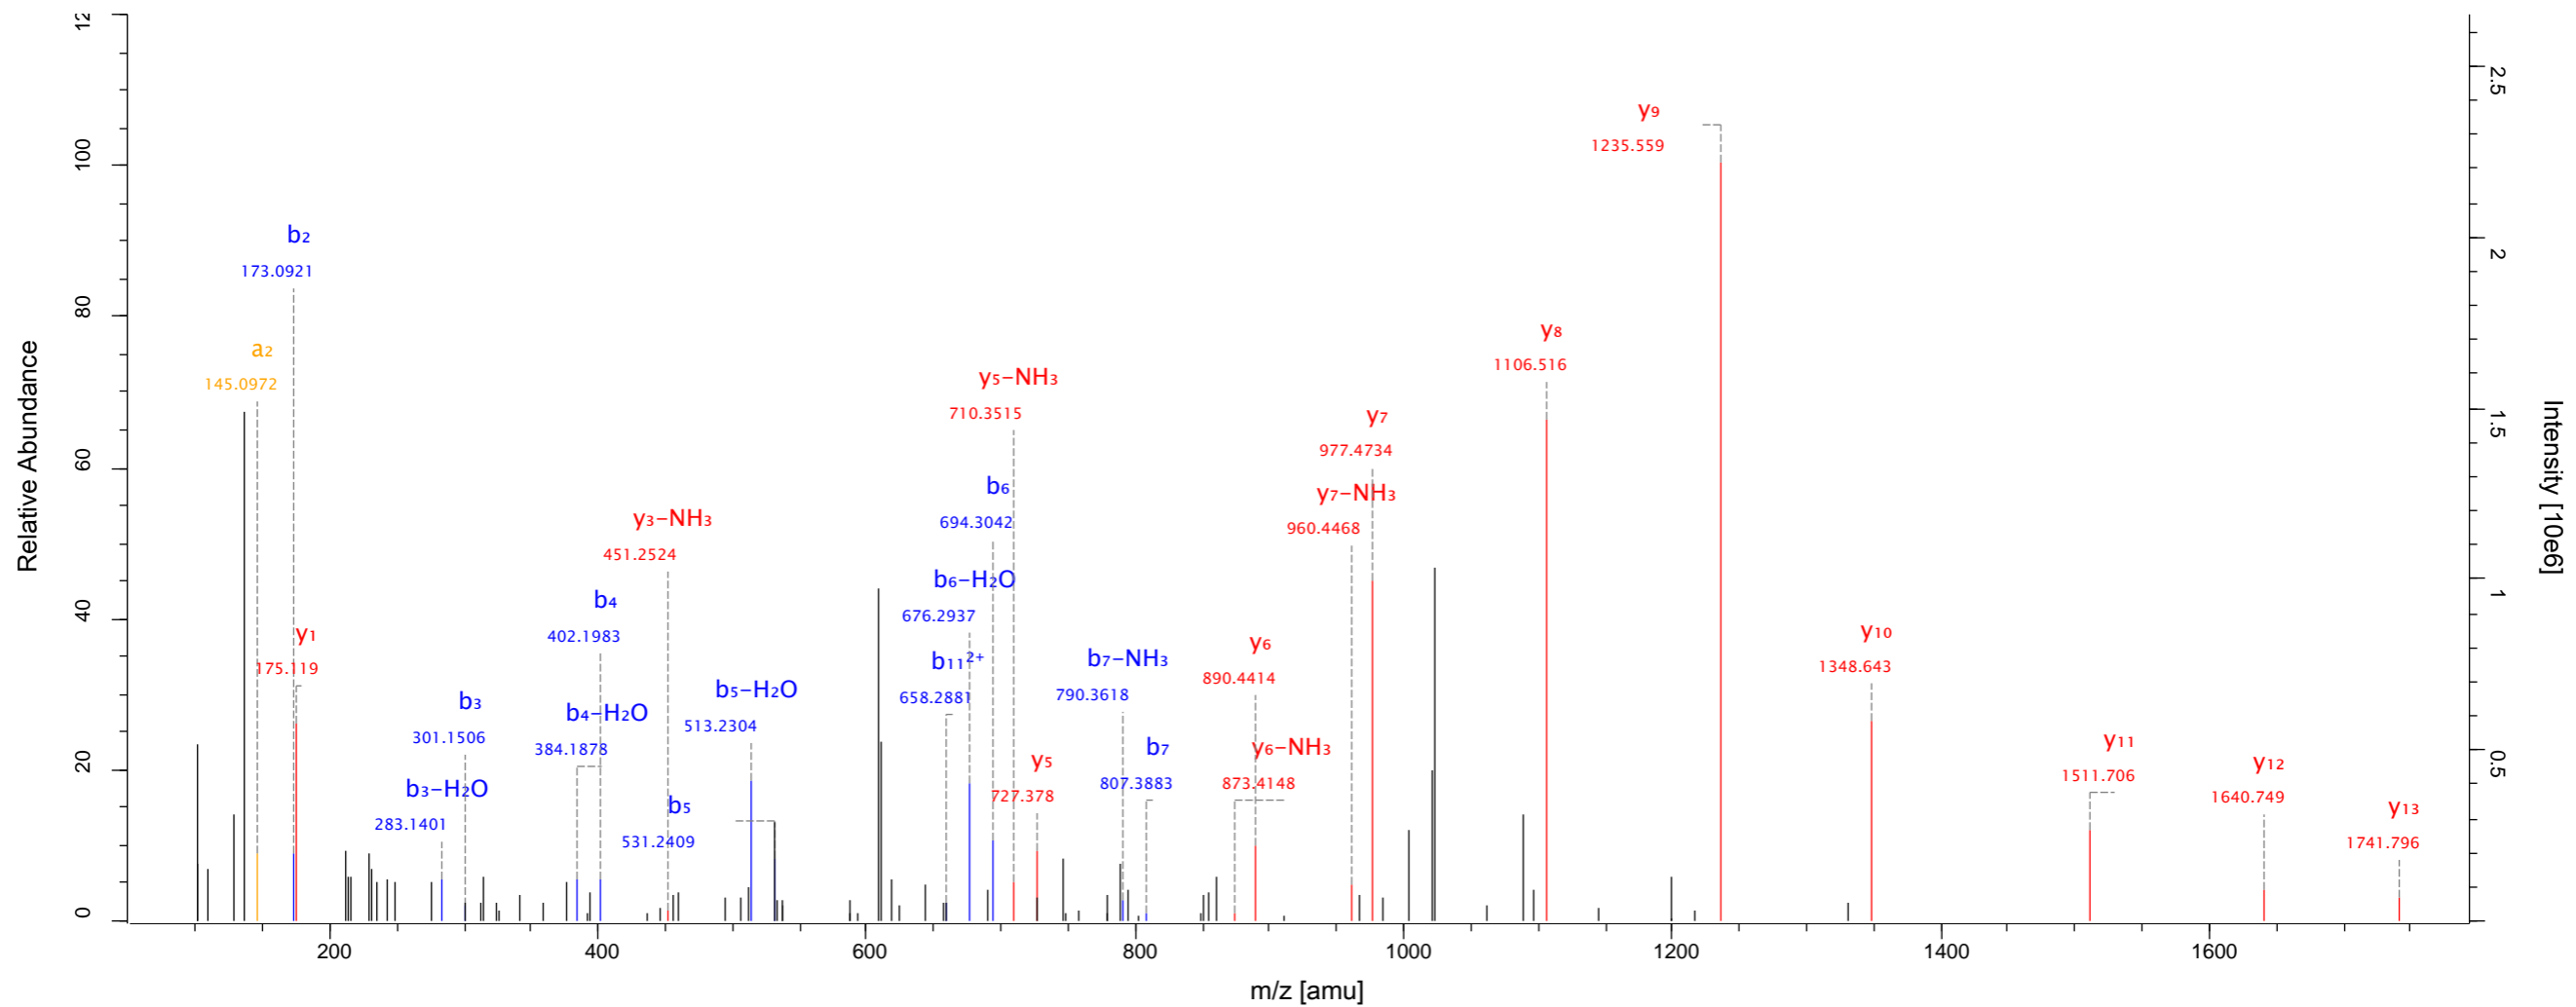

Raw file: 20111212\_EXQ5\_AnMi\_QC\_HCMVp1\_26  
 Scan number: 20243  
 Protein: ORFL159W + NC\_006273.2[101475,109052]+ <unknown description>; ORFL159W.iORF1 + NC\_006273.2[101526,109052]+ <unknown description>  
 Peptide score: 71.24  
 Method: FTMS; HCD

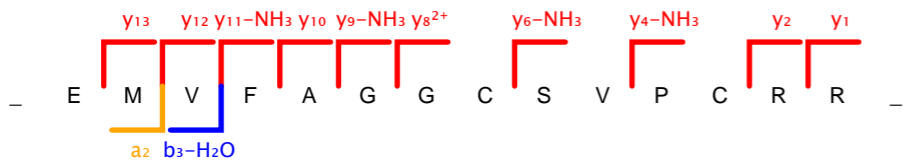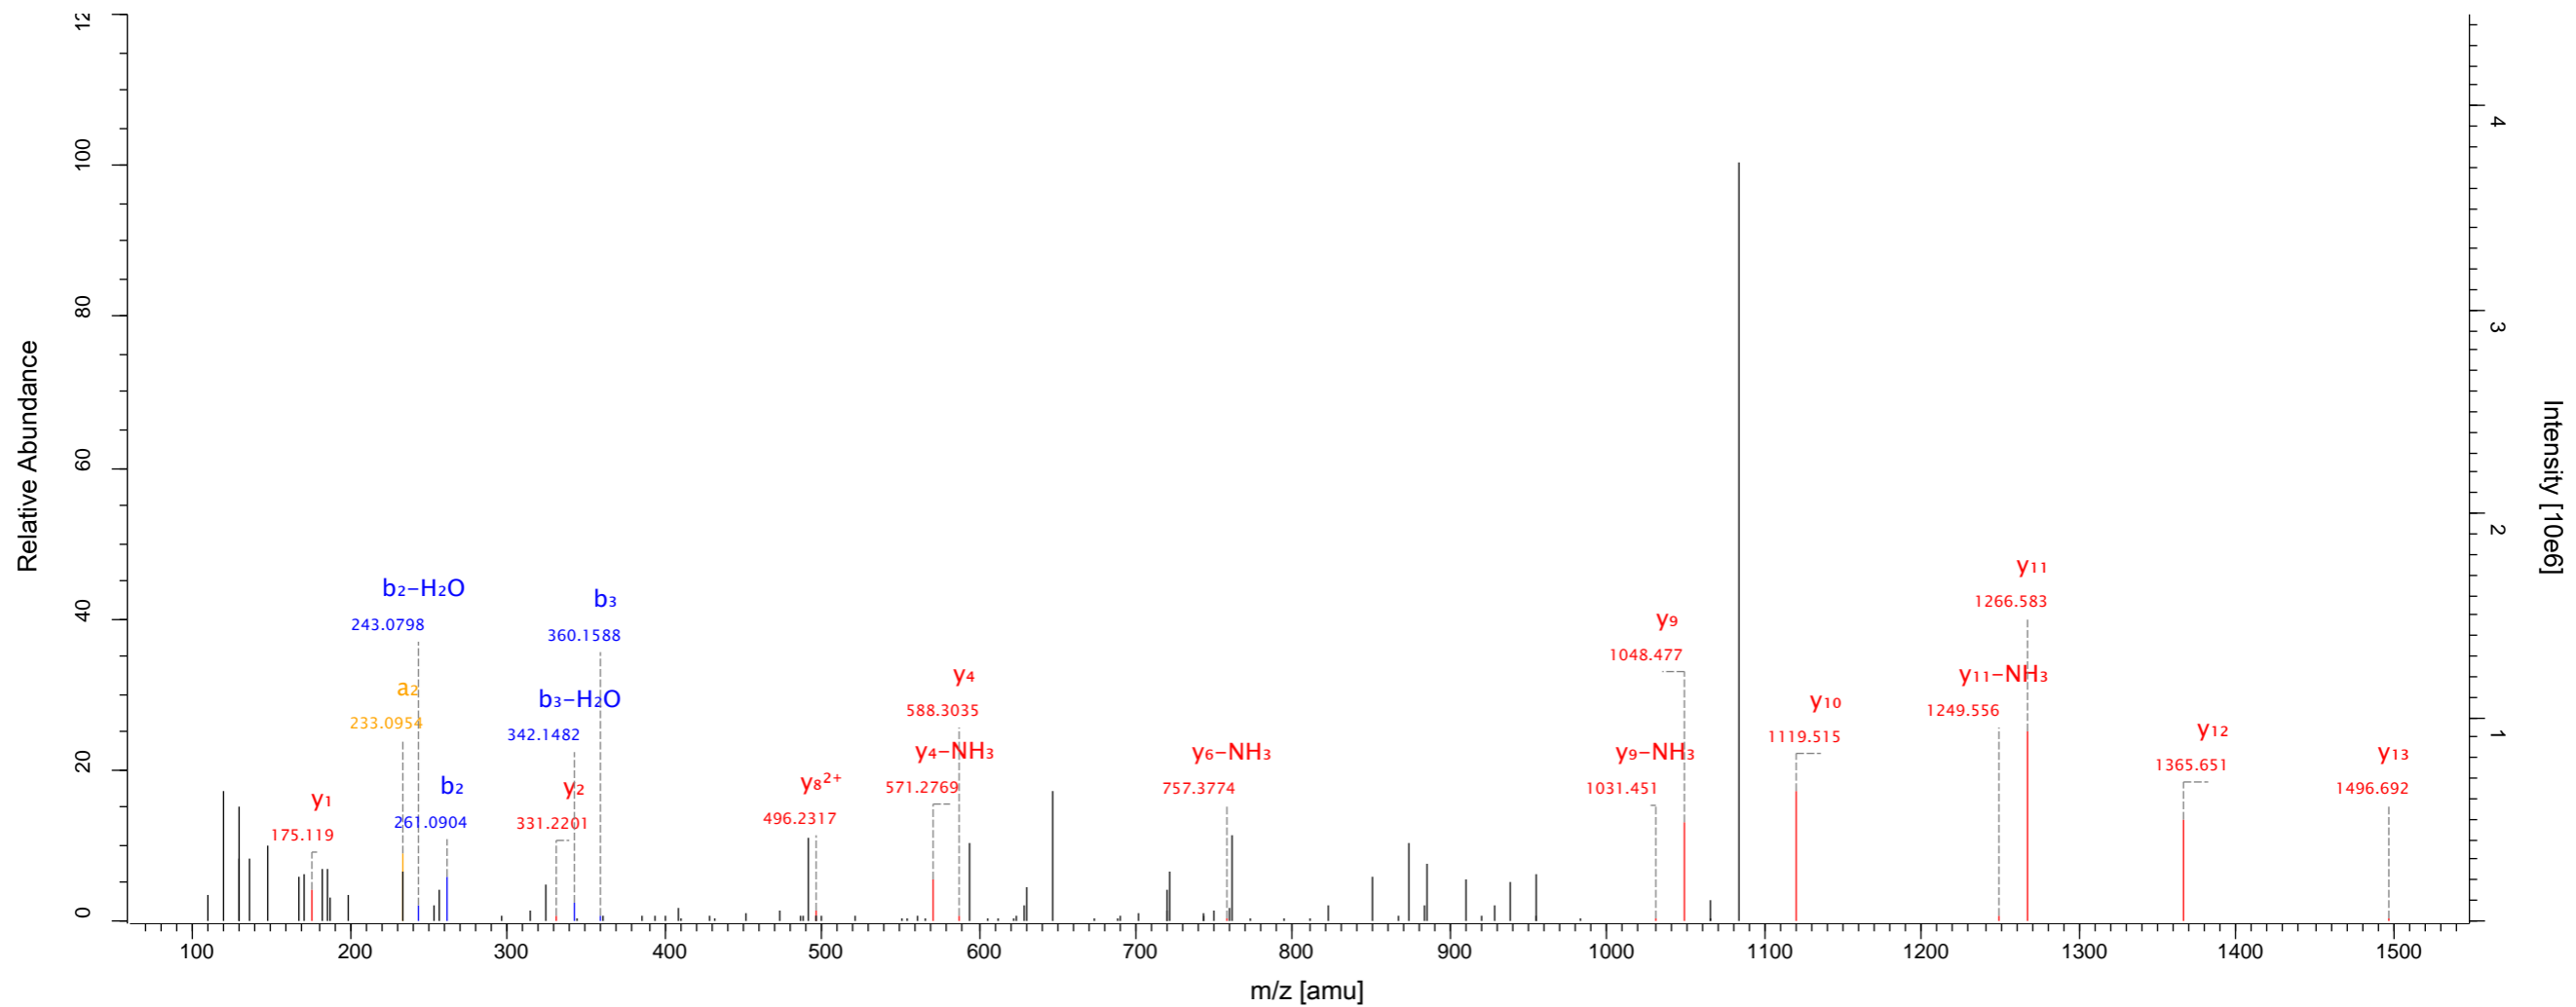



Raw file: 20111212\_EXQ5\_AnMi\_QC\_HCMVp11\_26  
Scan number: 20338  
Protein: ORFL88C - NC\_006273.2[37894,38133]- <unknown description>  
Peptide score: 127.84  
Method: FTMS; HCD

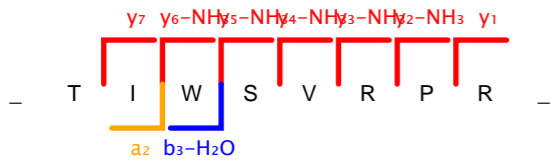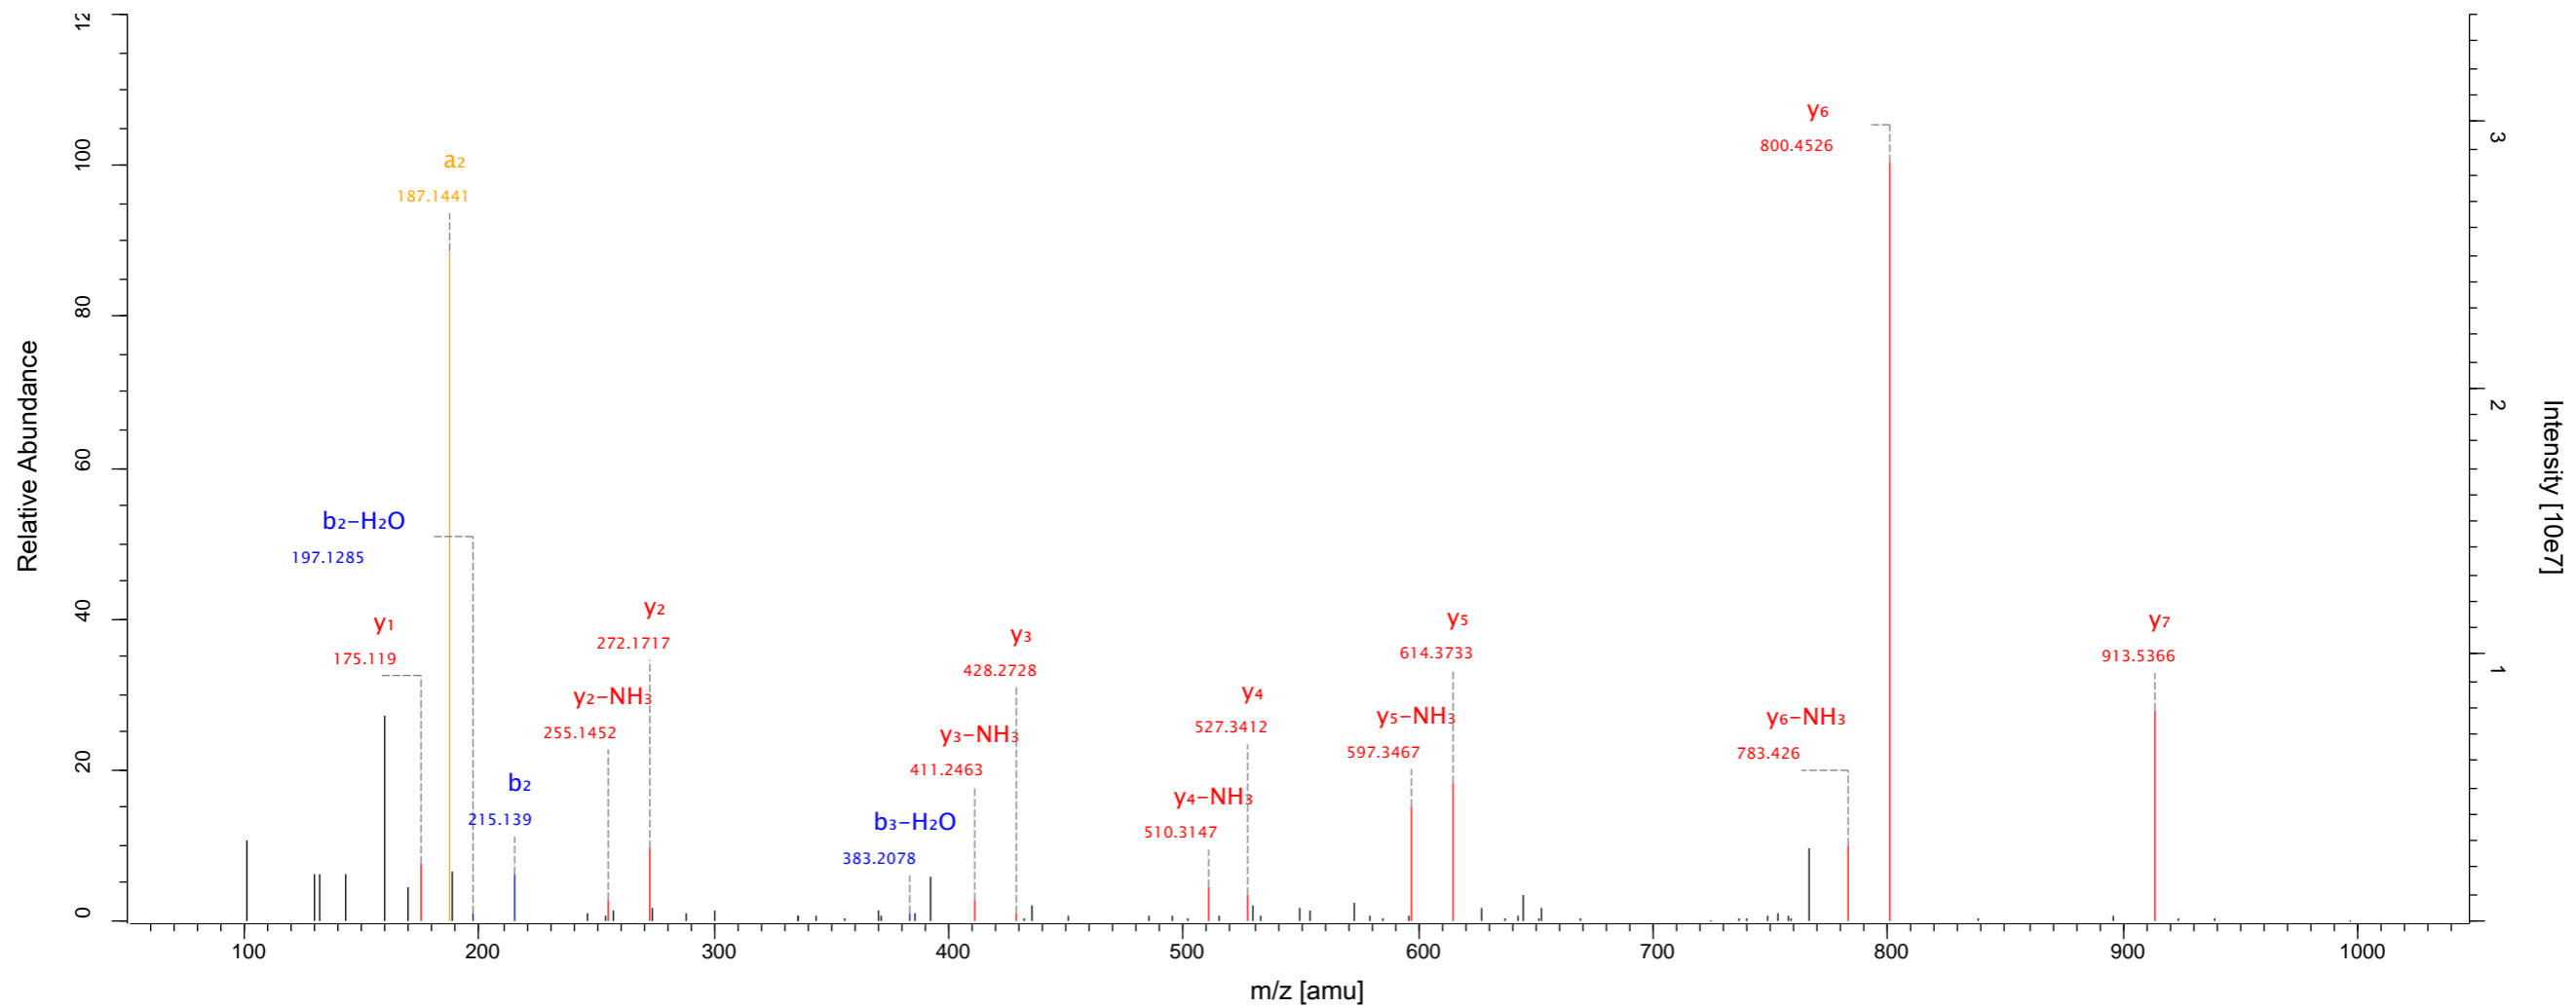

Raw file: 20111212\_EXQ5\_AnMi\_QC\_HCMVp11\_26  
Scan number: 21294  
Protein: ORFL27C - NC\_006273.2[7912,13003]- <unknown description>  
Peptide score: 83  
Method: FTMS; HCD

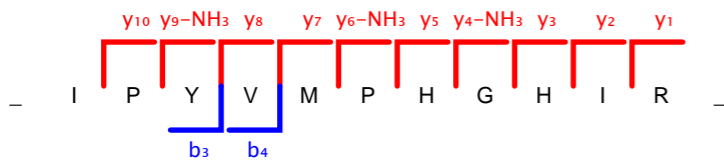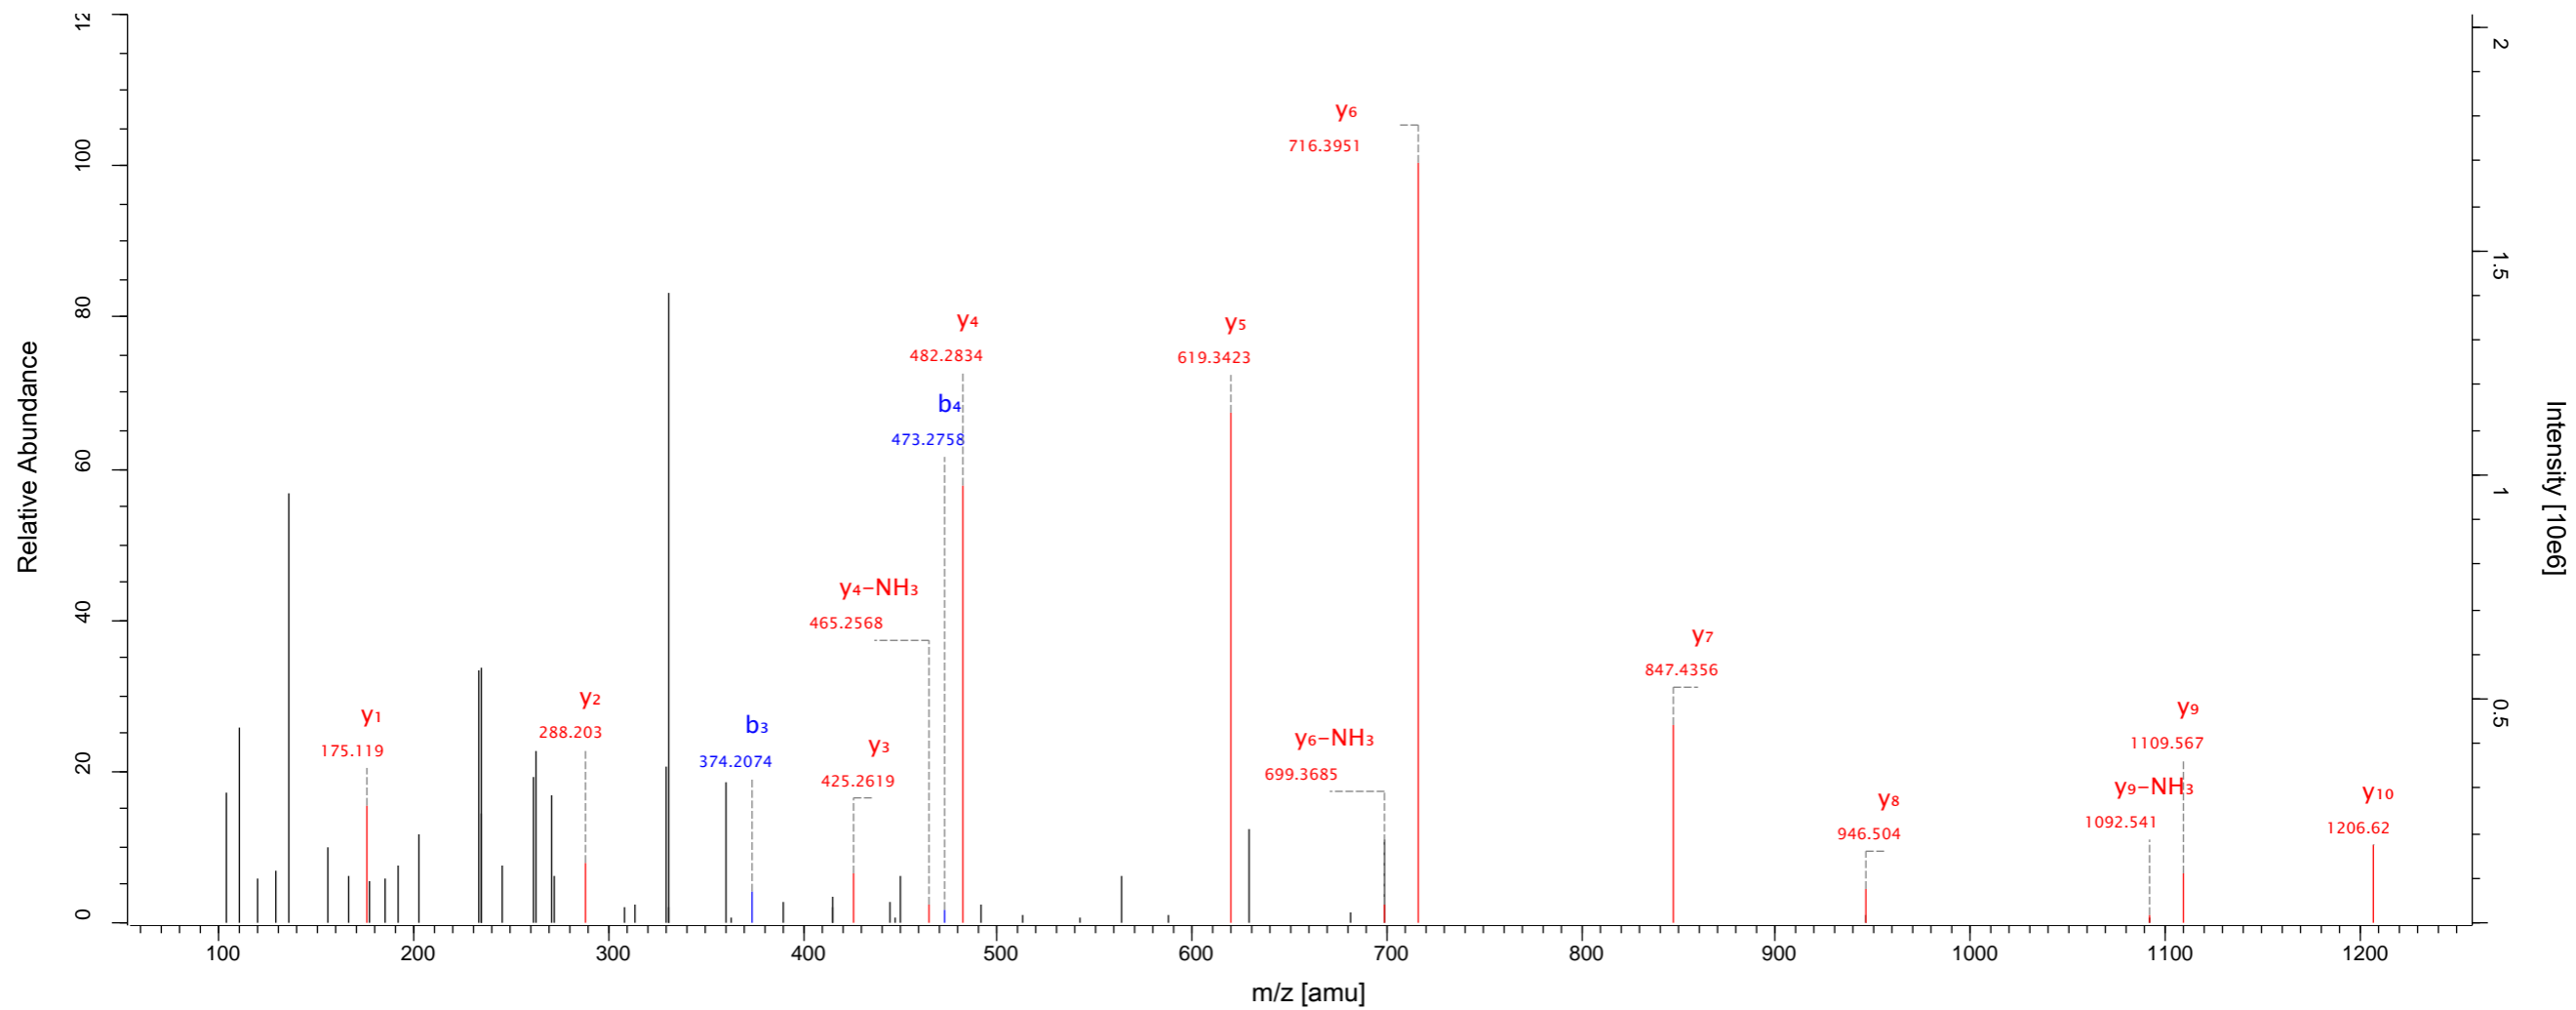

Raw file: 20111212\_EXQ5\_AnMi\_QC\_HCMVp1\_26  
Scan number: 21409  
Protein: ORFL154W + NC\_006273.2[96843,97115]+ <unknown description>; ORFL154W.iORF1 + NC\_006273.2[96972,97115]+ <unknown description>  
Peptide score: 89.25  
Method: FTMS; HCD

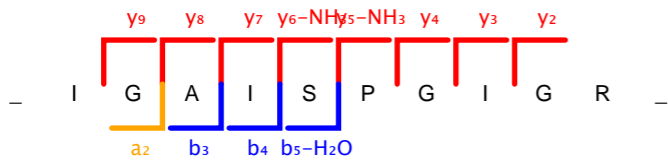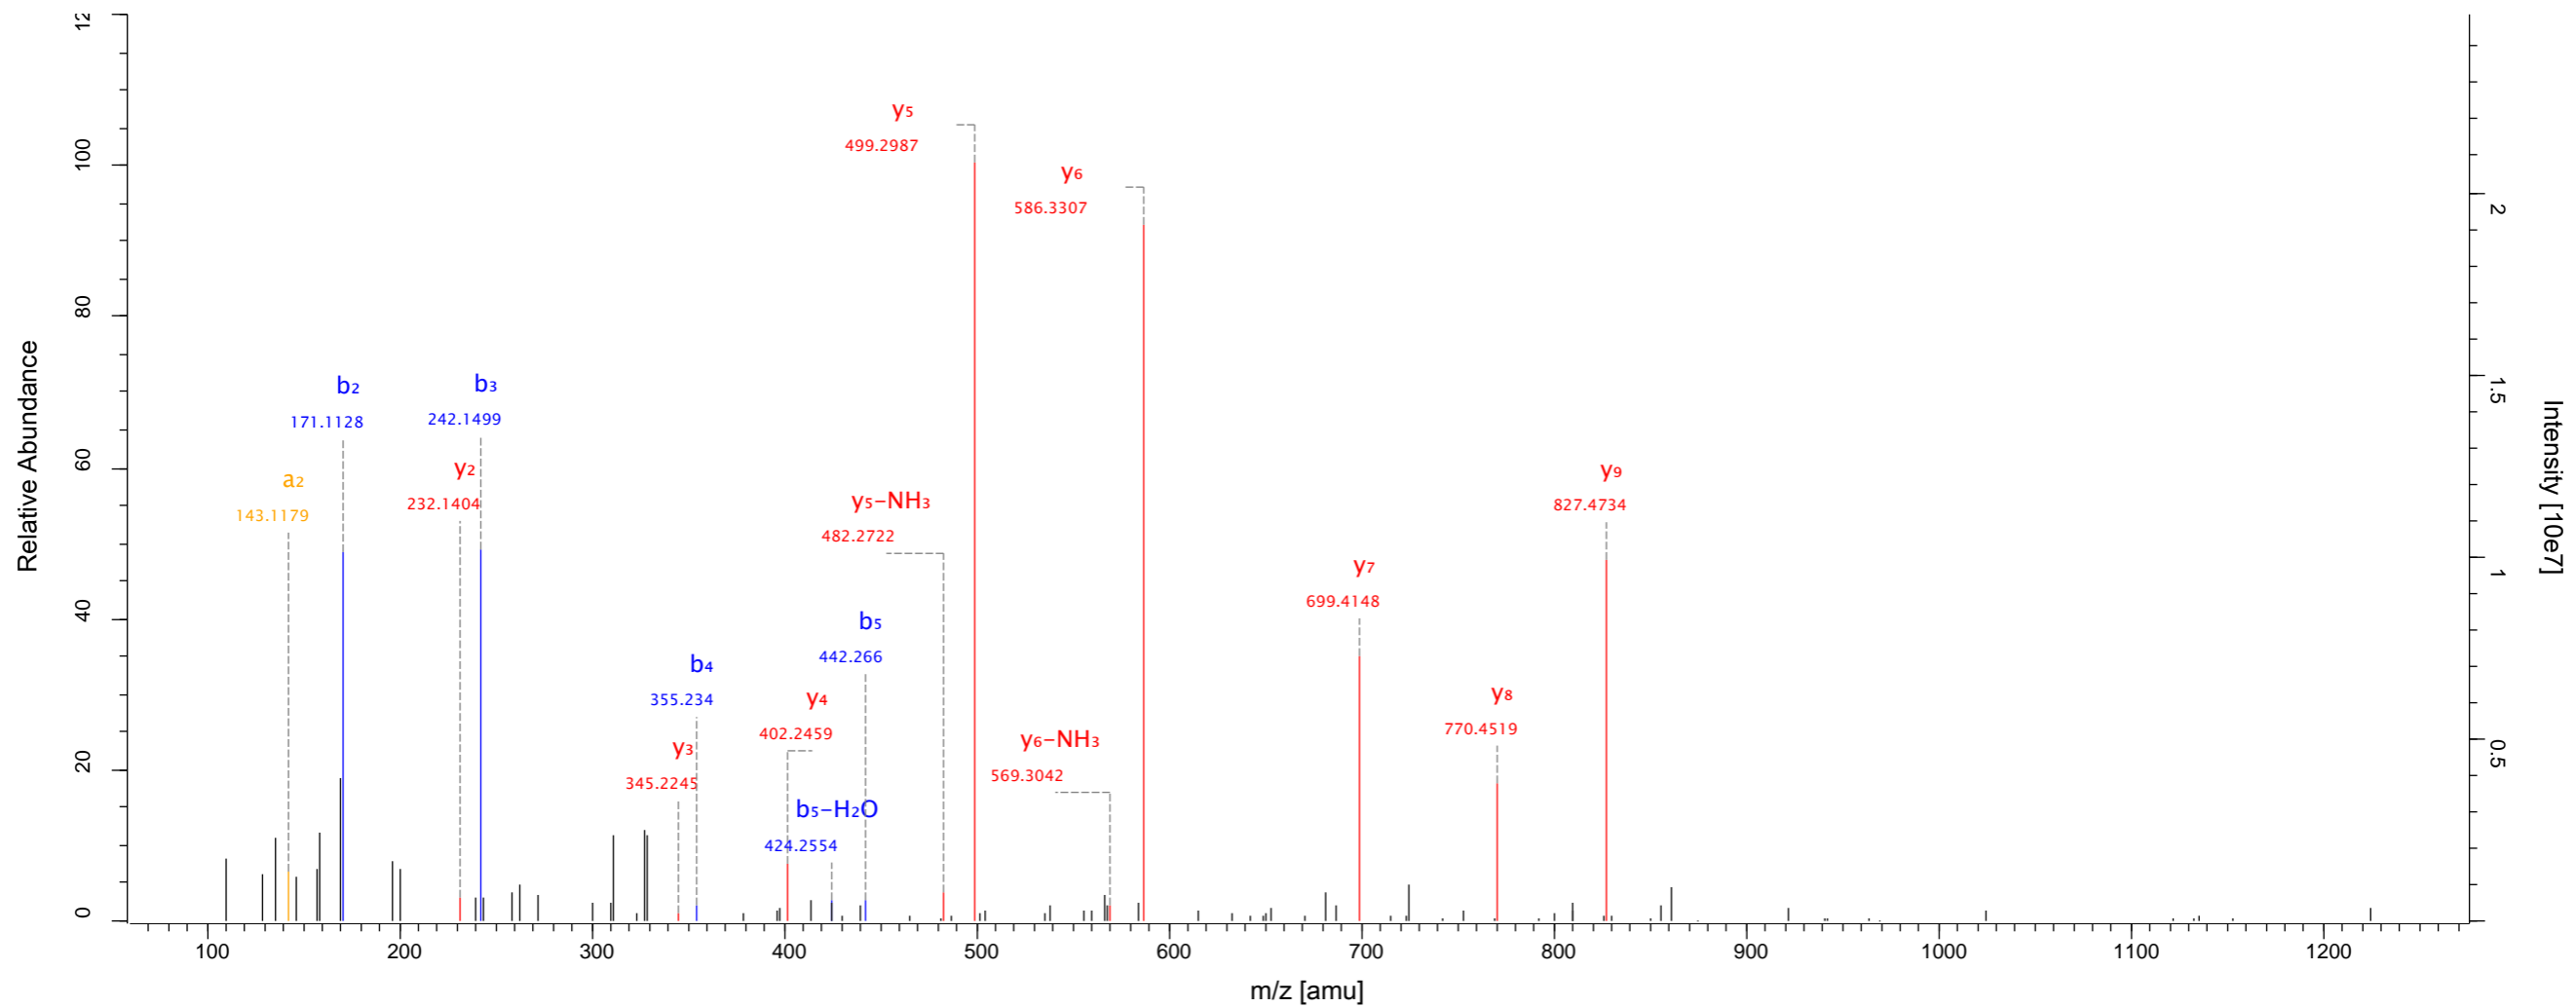

Raw file: 20111212\_EXQ5\_AnMi\_QC\_HCMVp1\_26  
 Scan number: 22393  
 Protein: ORFL223W + NC\_006273.2[139458,139730]+ <unknown description>  
 Peptide score: 84.87  
 Method: FTMS; HCD

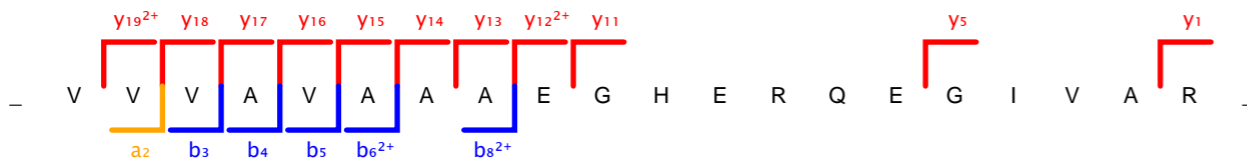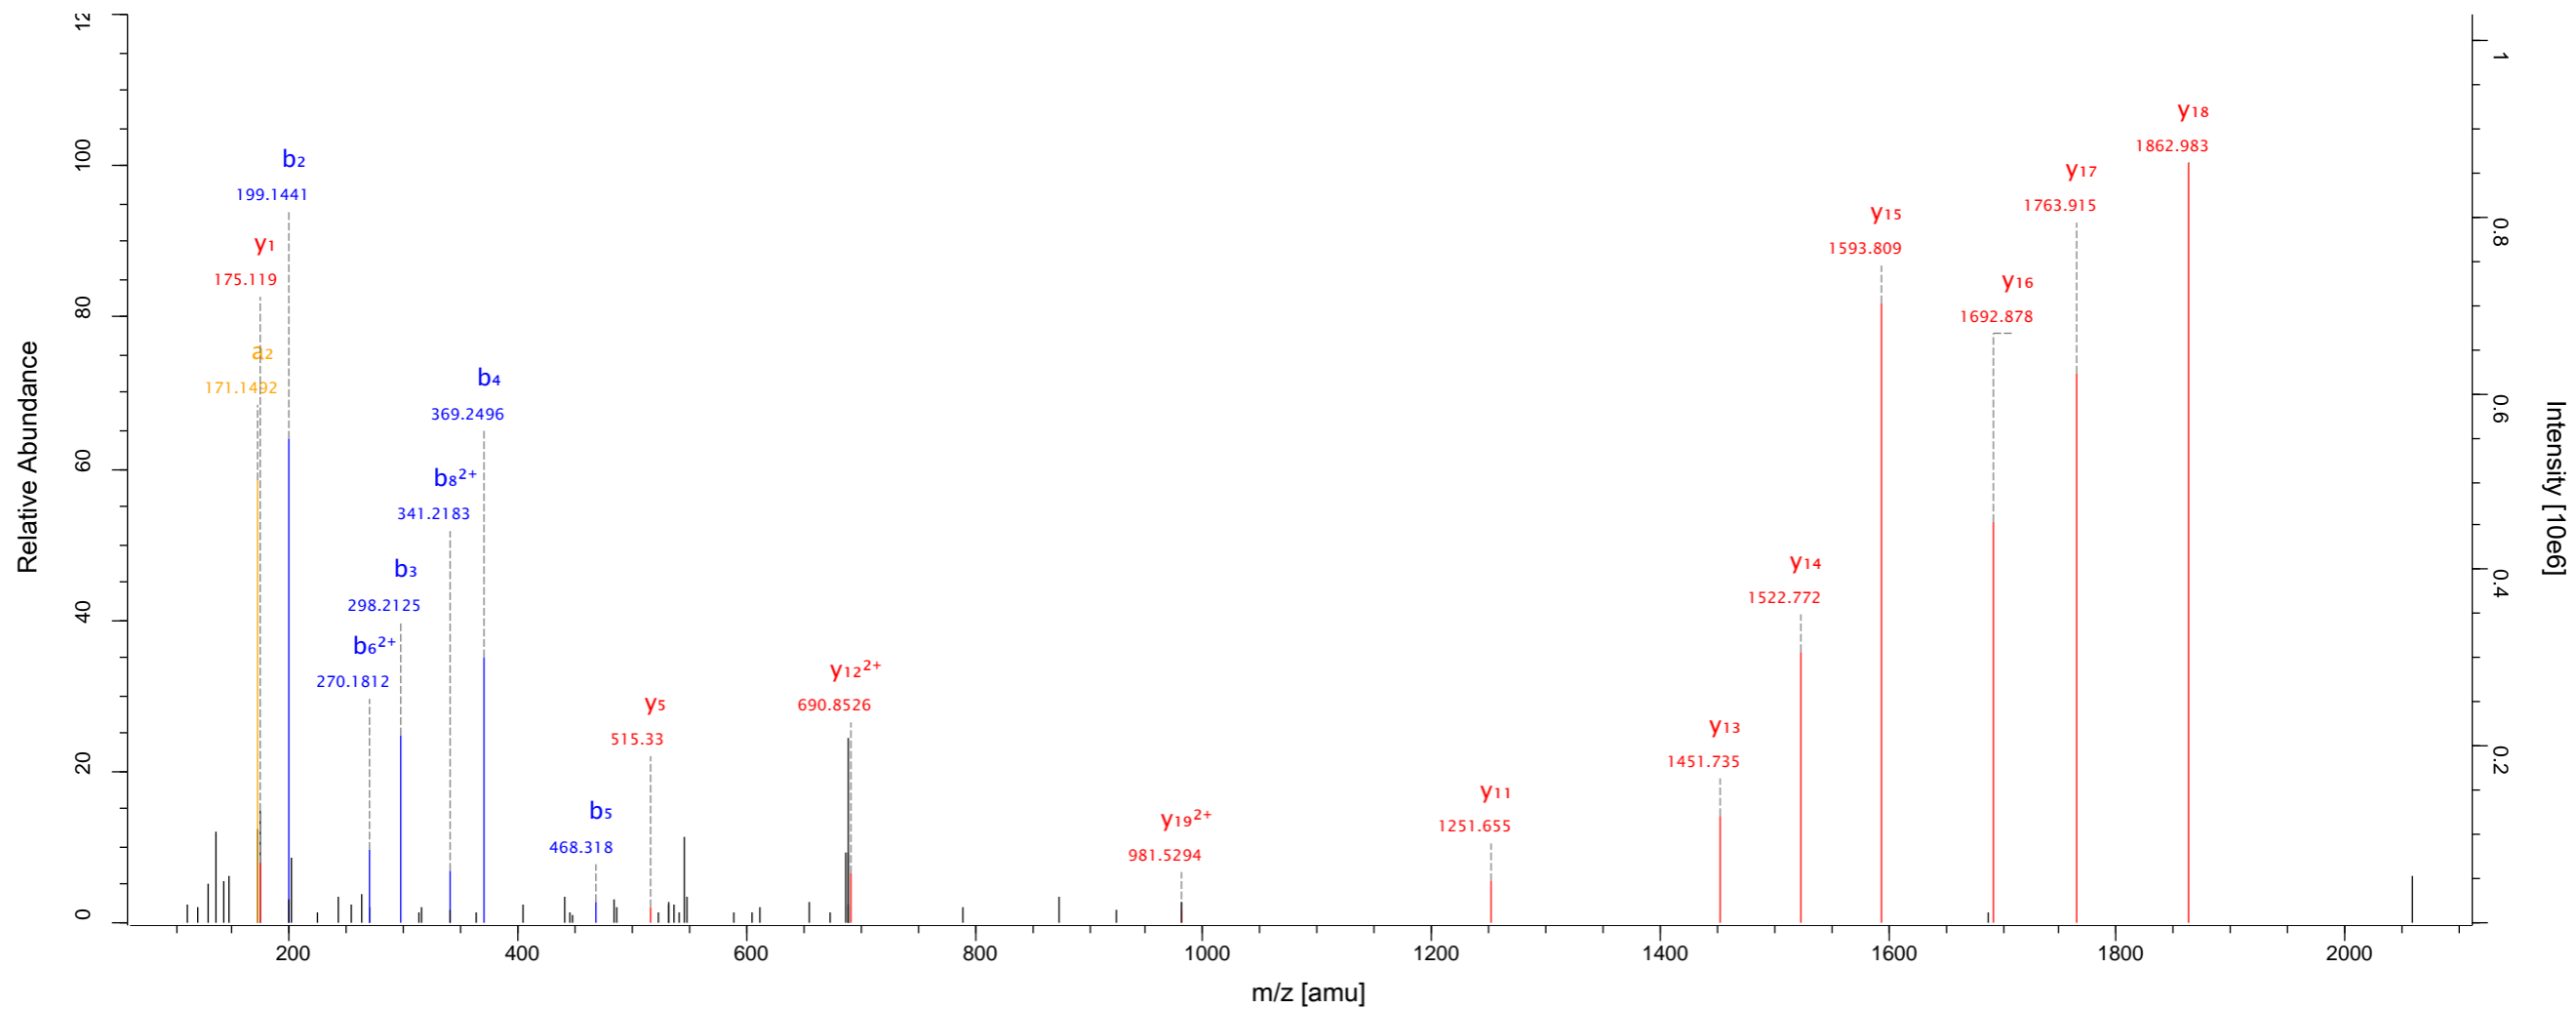

Raw file: 20111212\_EXQ5\_AnMi\_QC\_HCMVp1\_26  
 Scan number: 23131  
 Protein: ORFL185C - NC\_006273.2[111134,111490]- <unknown description>; ORFL184C.iORF3 - NC\_006273.2[111134,111379]- <unknown description>  
 Peptide score: 138.02  
 Method: FTMS; HCD

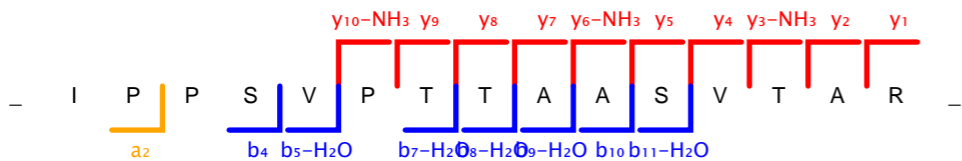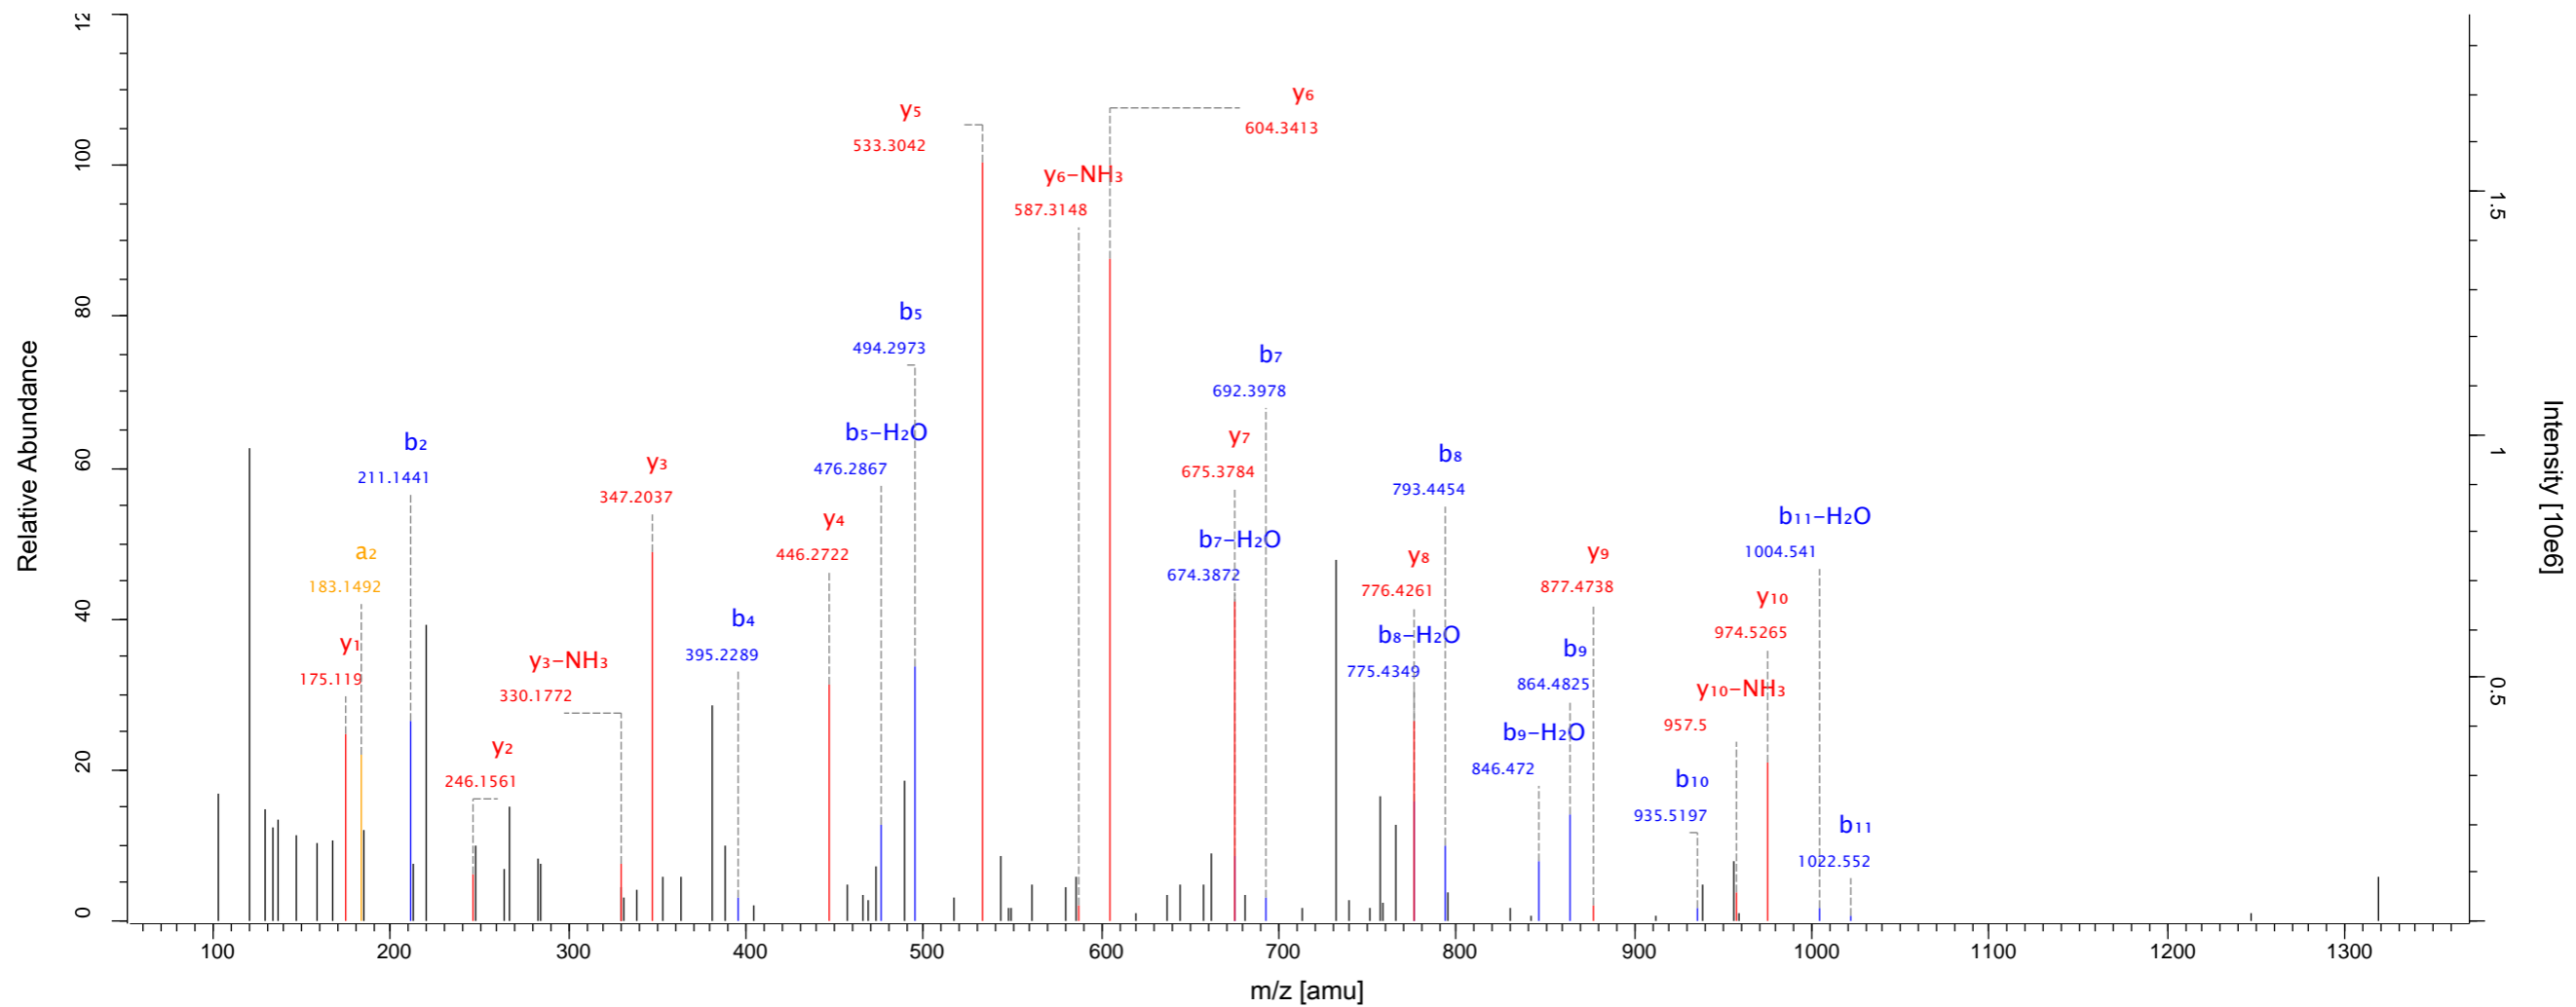

Raw file: 20111212\_EXQ5\_AnMi\_QC\_HCMVp1\_26  
Scan number: 25309  
Protein: ORFL106C - NC\_006273.2[53935,54294]- <unknown description>  
Peptide score: 147.2  
Method: FTMS; HCD

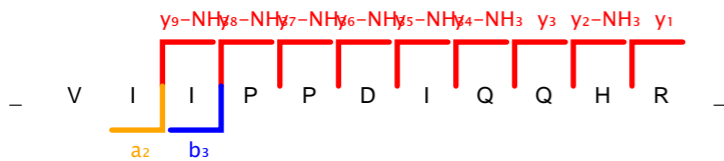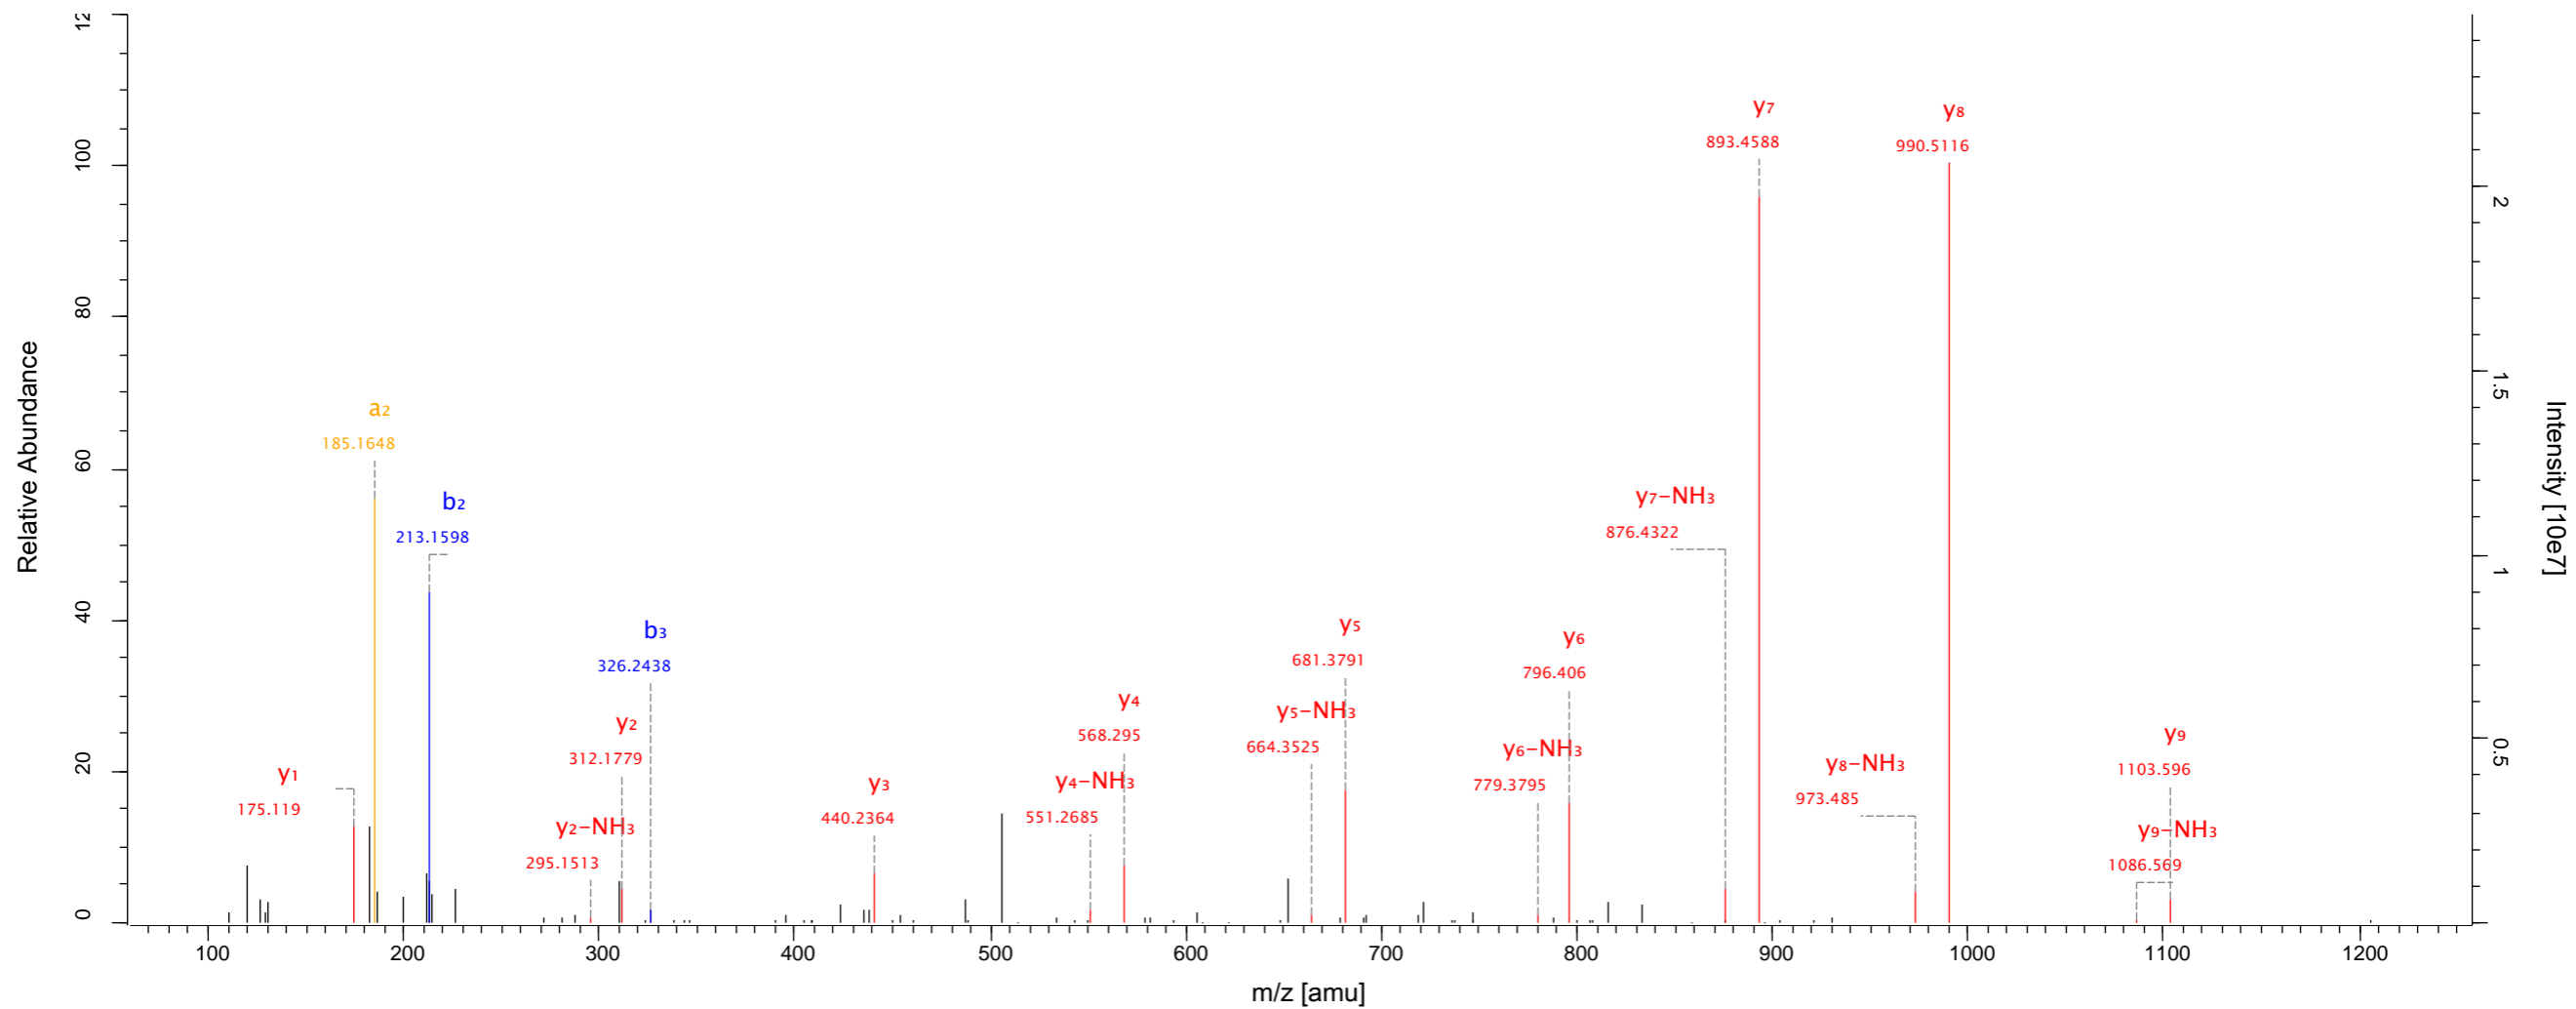

Raw file: 20111212\_EXQ5\_AnMi\_QC\_HCMVp11\_26  
Scan number: 27594  
Protein: ORFL151C - NC\_006273.2[92499,92870]- <unknown description>  
Peptide score: 133.13  
Method: FTMS; HCD

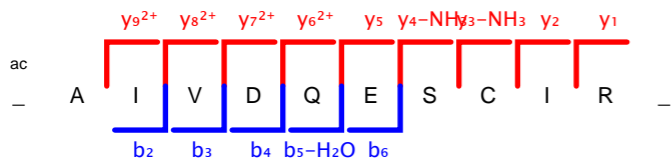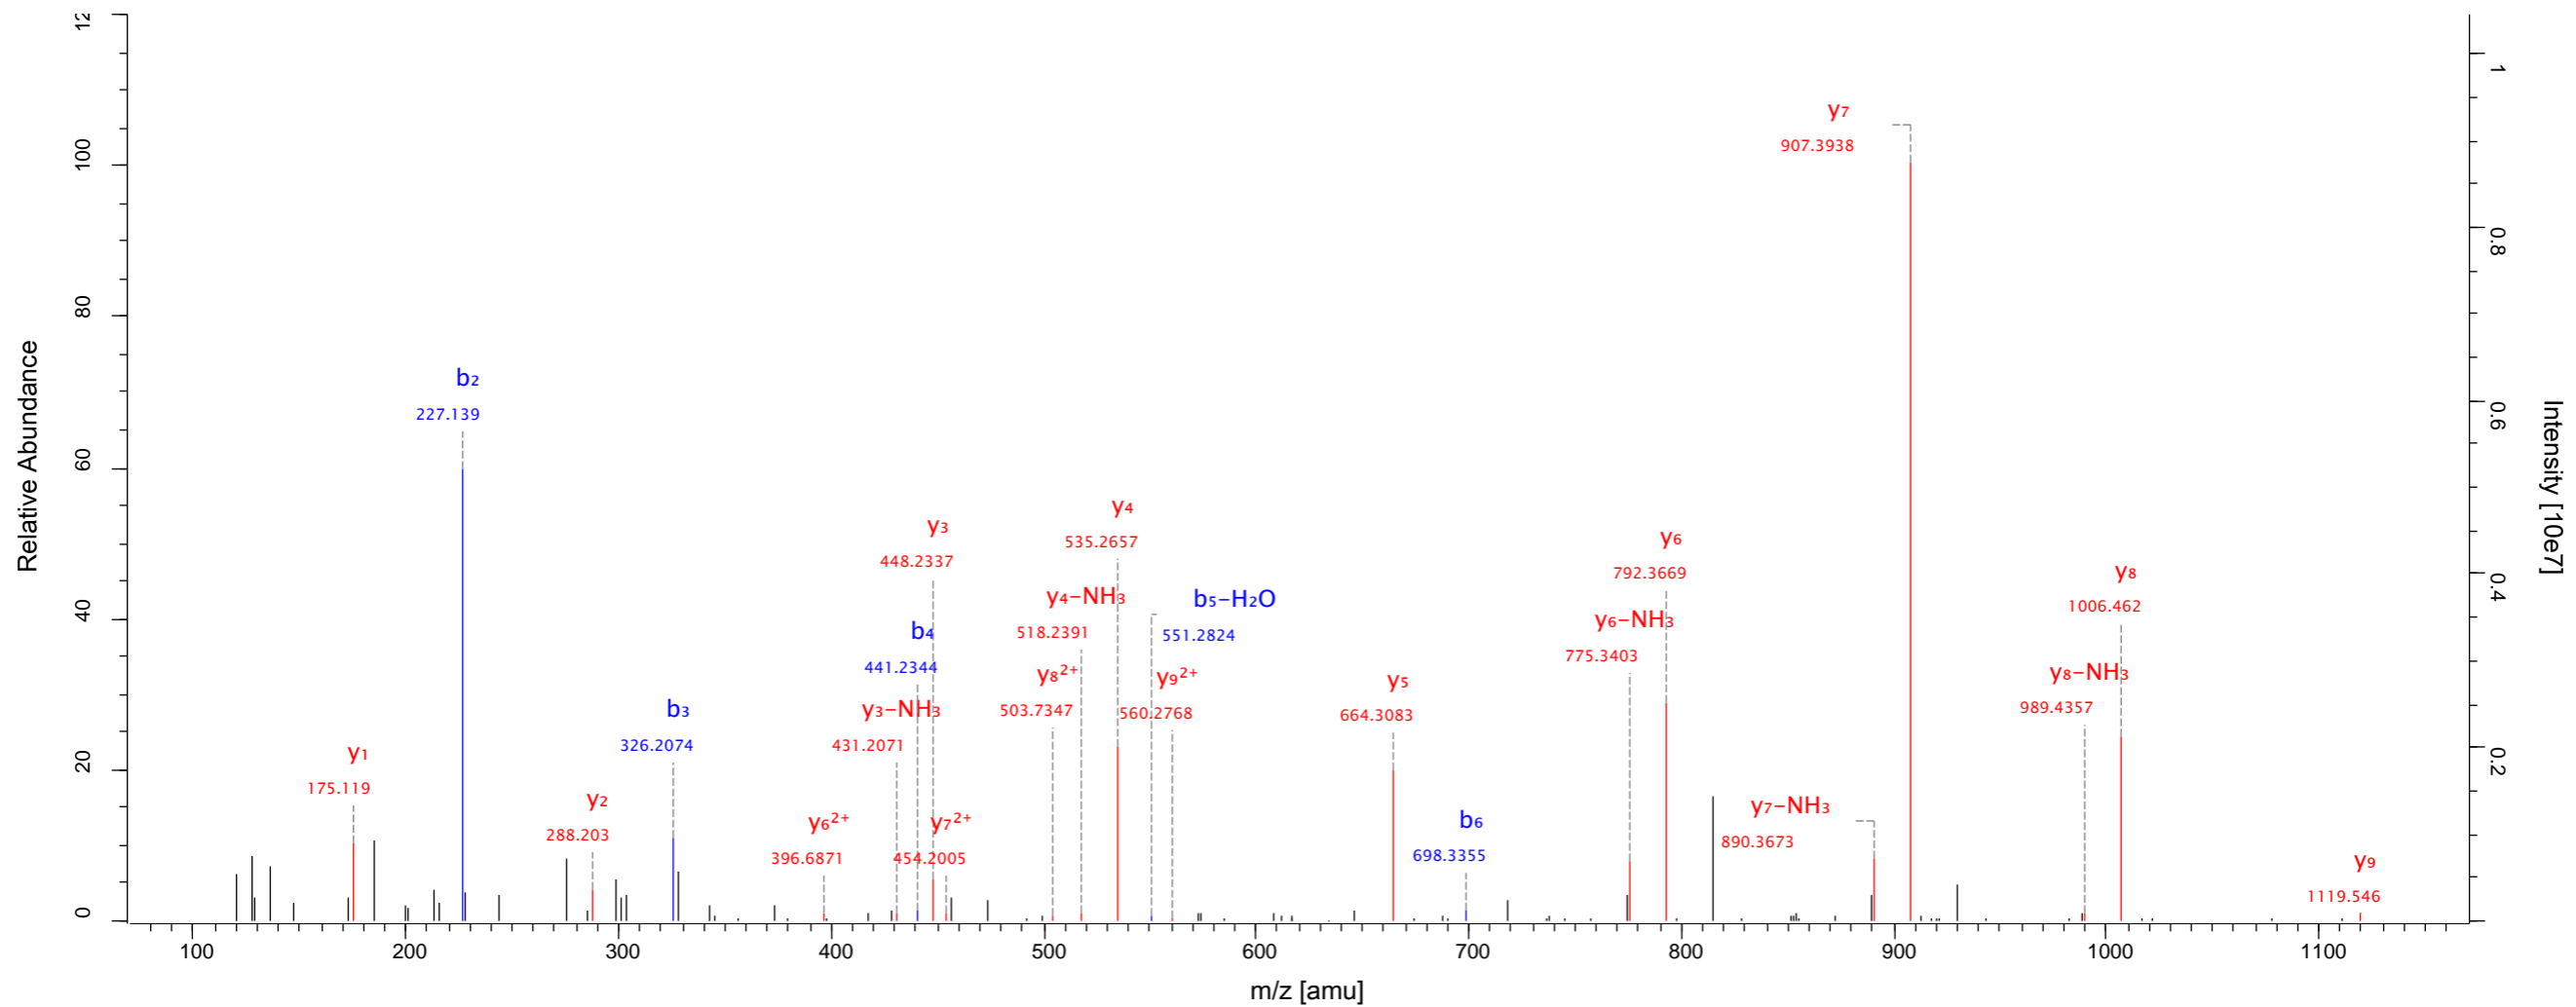

Raw file: 20111212\_EXQ5\_AnMi\_QC\_HCMVp11\_26  
Scan number: 28094  
Protein: ORFS343C.iORF1 - NC\_006273.2[210869,211213]- <unknown description>  
Peptide score: 137.95  
Method: FTMS; HCD

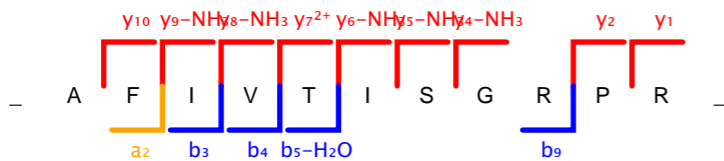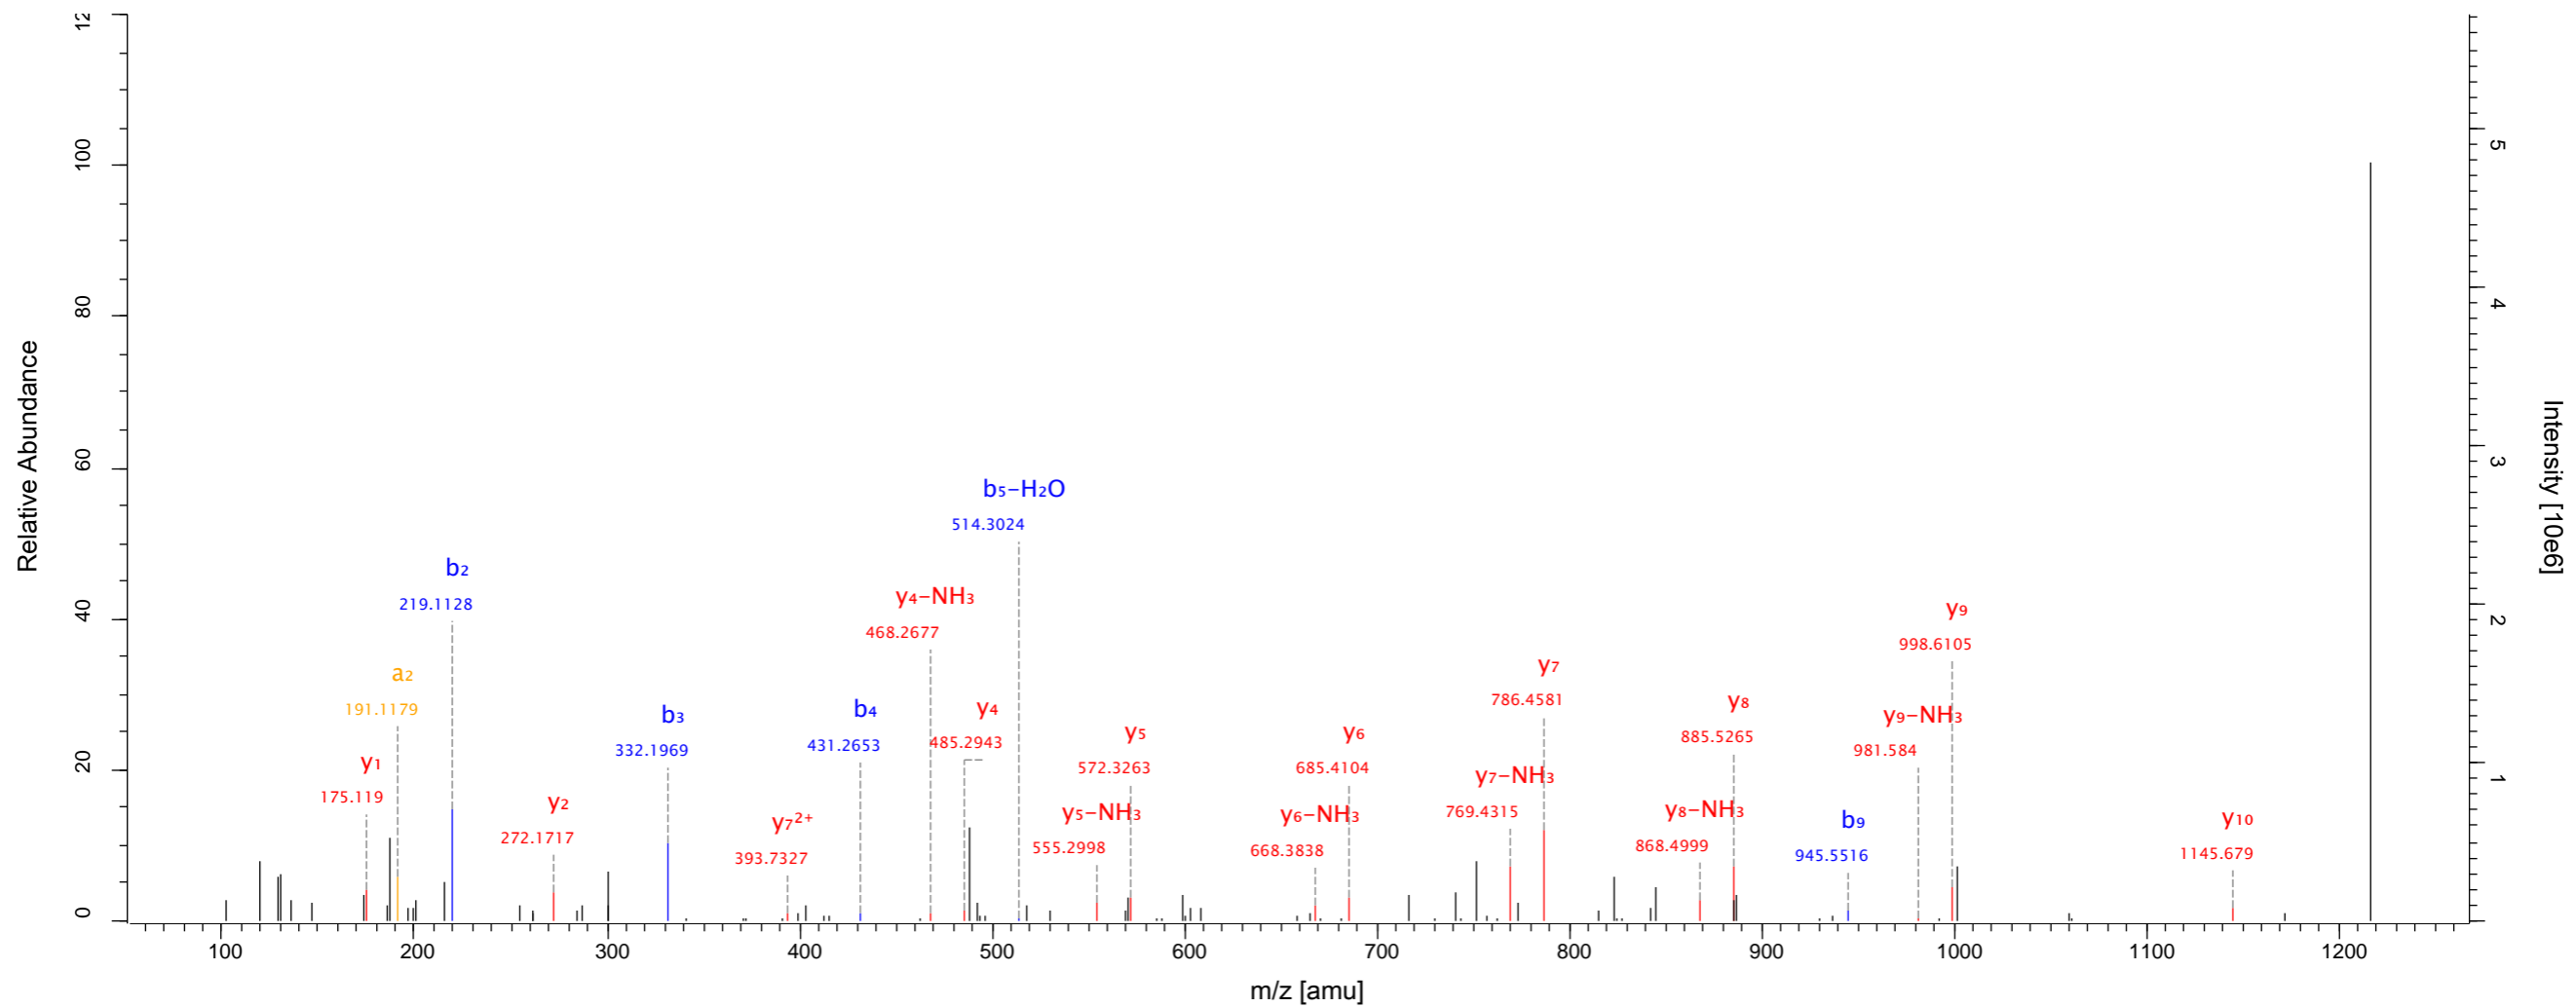



Raw file: 20111212\_EXQ5\_AnMi\_QC\_HCMVp1\_26  
Scan number: 32927  
Protein: ORFL223W + NC\_006273.2[139458,139730]+ <unknown description>  
Peptide score: 143.89  
Method: FTMS; HCD

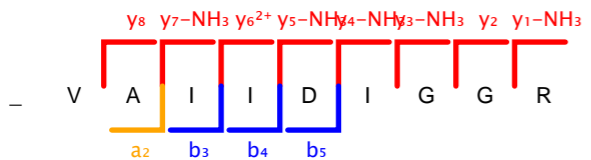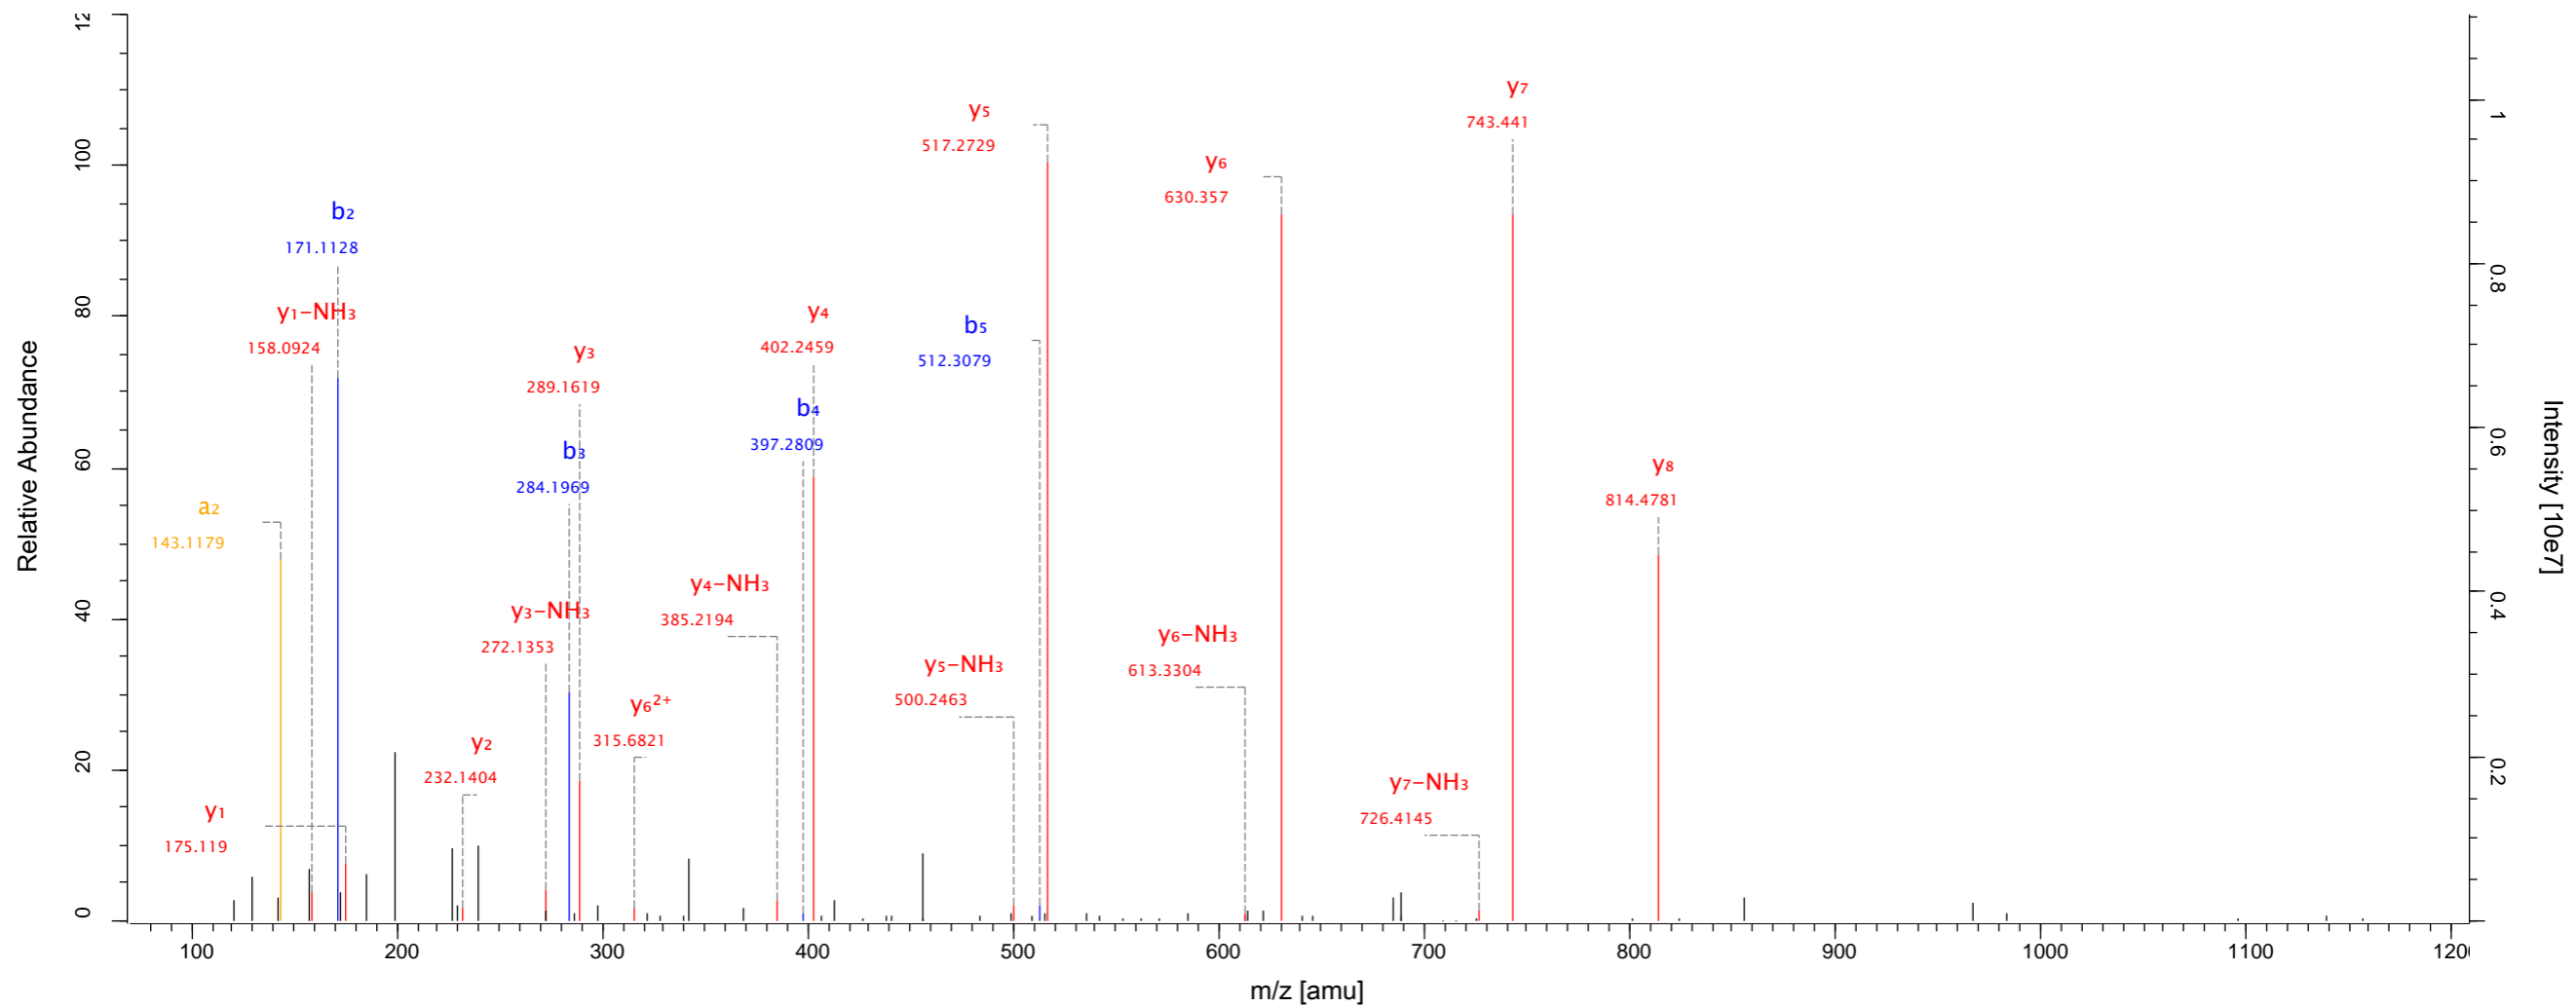

Raw file: 20111212\_EXQ5\_AnMi\_QC\_HCMVp1\_26  
Scan number: 33368  
Protein: ORFL174C.iORF1 - NC\_006273.2[106302,106568]- <unknown description>  
Peptide score: 74.72  
Method: FTMS; HCD

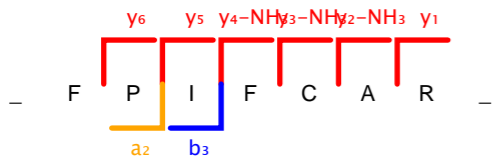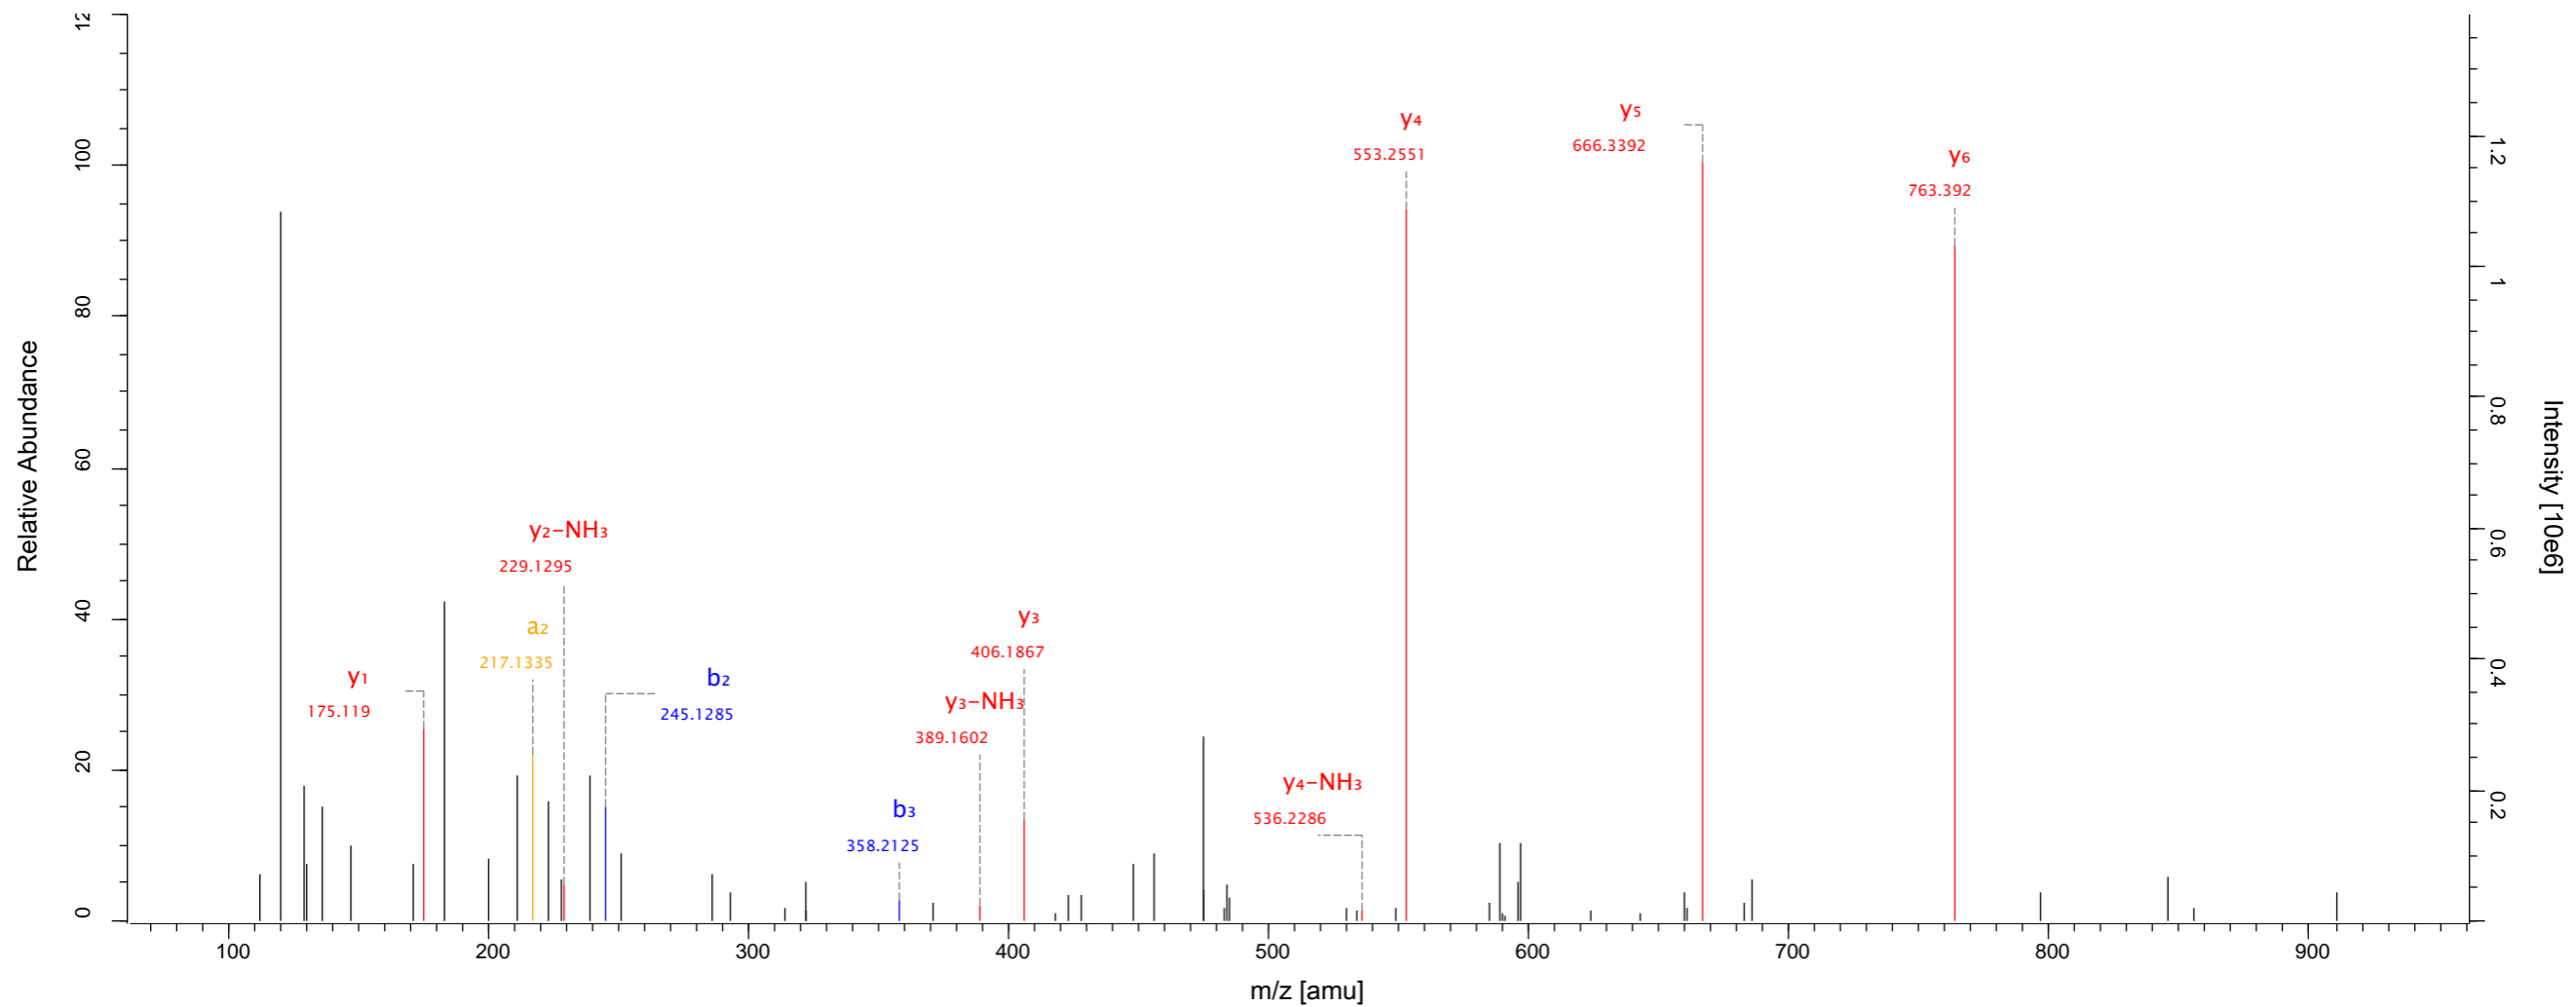

Raw file: 20111212\_EXQ5\_AnMi\_QC\_HCMVp1\_26  
Scan number: 34748  
Protein: ORFL223W + NC\_006273.2[139458,139730]+ <unknown description>  
Peptide score: 113.69  
Method: FTMS; HCD

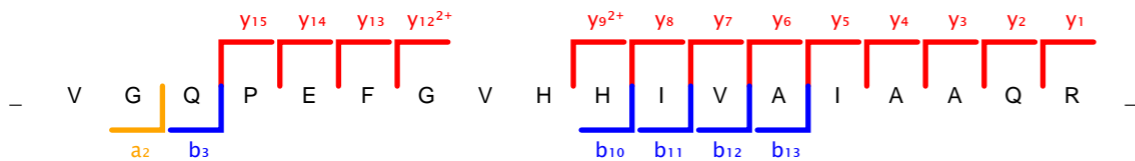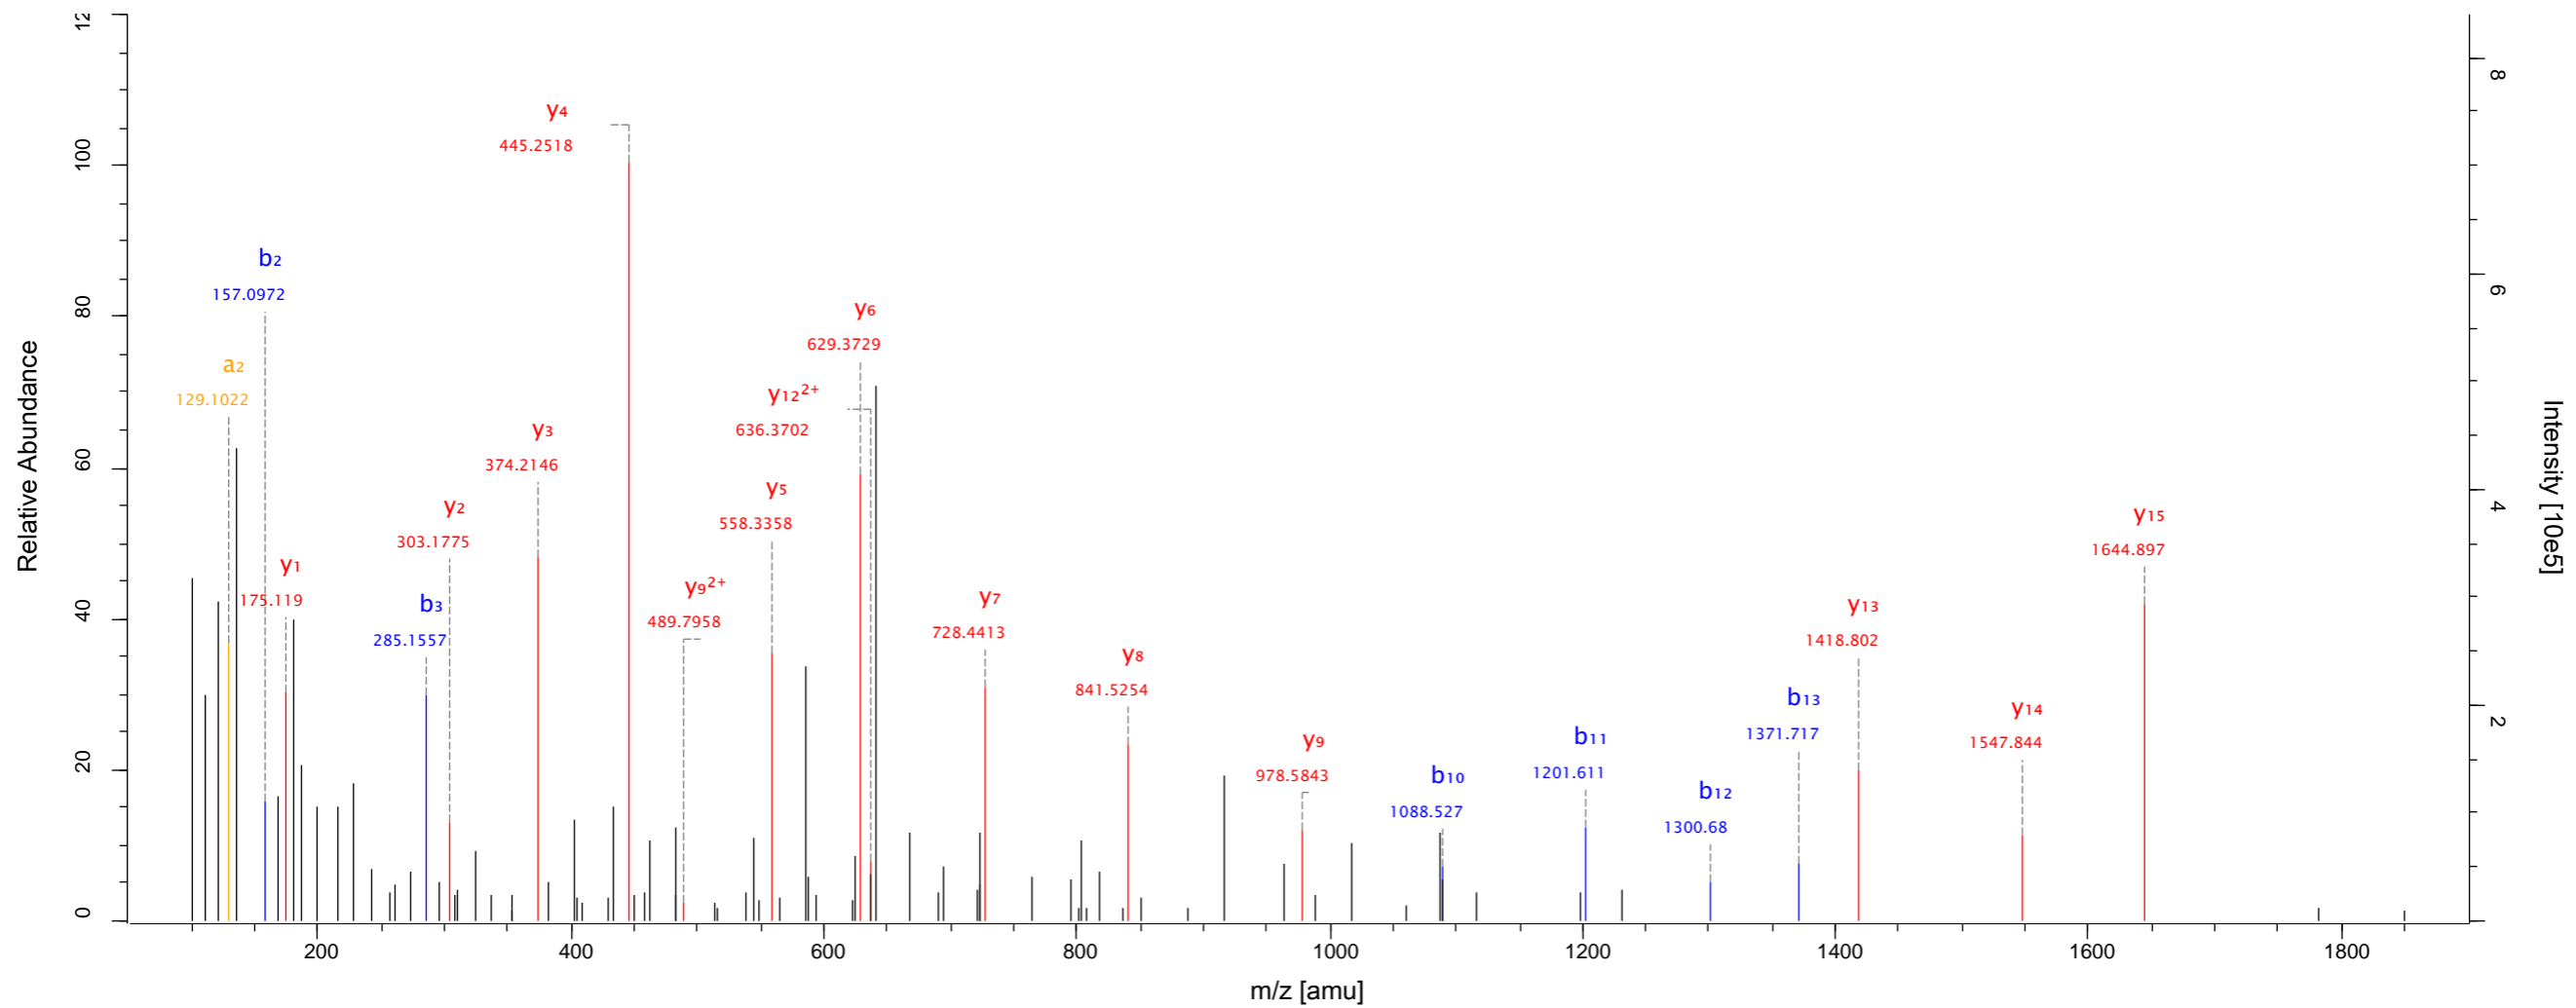

Raw file: 20111212\_EXQ5\_AnMi\_QC\_HCMVp1\_26  
Scan number: 35064  
Protein: ORFL253W.iORF3 + NC\_006273.2[162059,162286]+ <unknown description>  
Peptide score: 56.81  
Method: FTMS; HCD

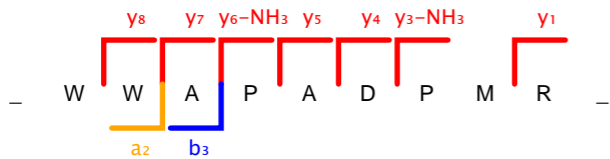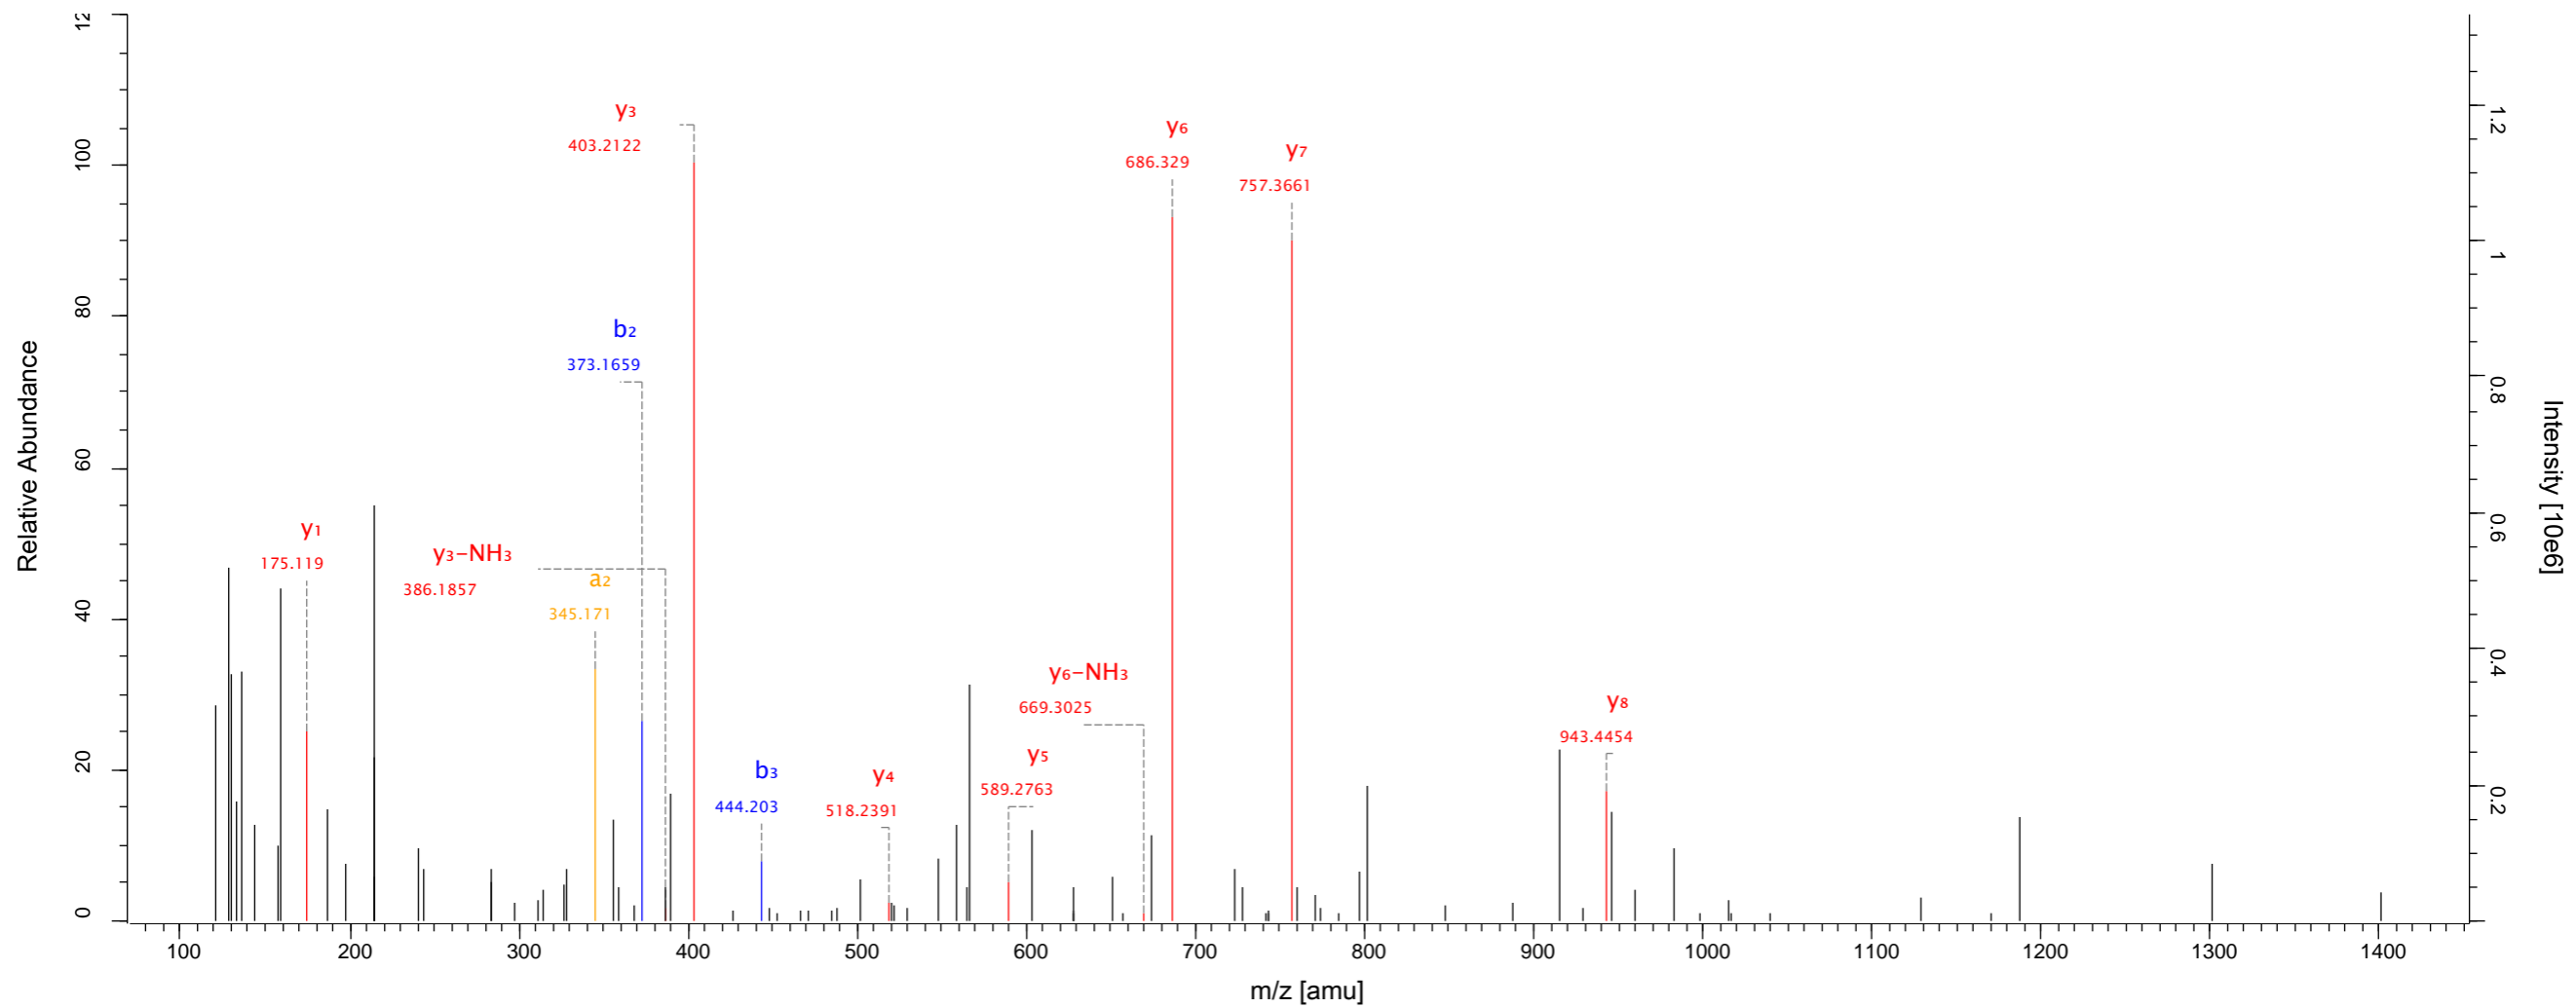

Raw file: 20111212\_EXQ5\_AnMi\_QC\_HCMVp1\_26  
 Scan number: 36428  
 Protein: ORFL88C - NC\_006273.2[37894,38133]- <unknown description>  
 Peptide score: 63.69  
 Method: FTMS; HCD

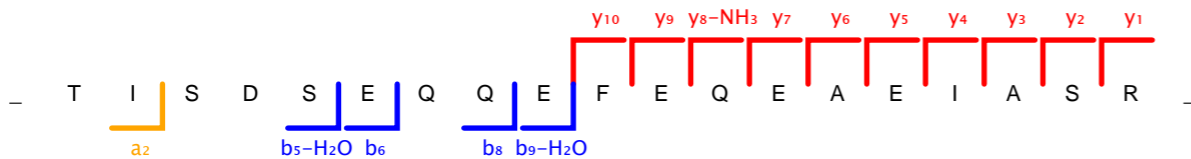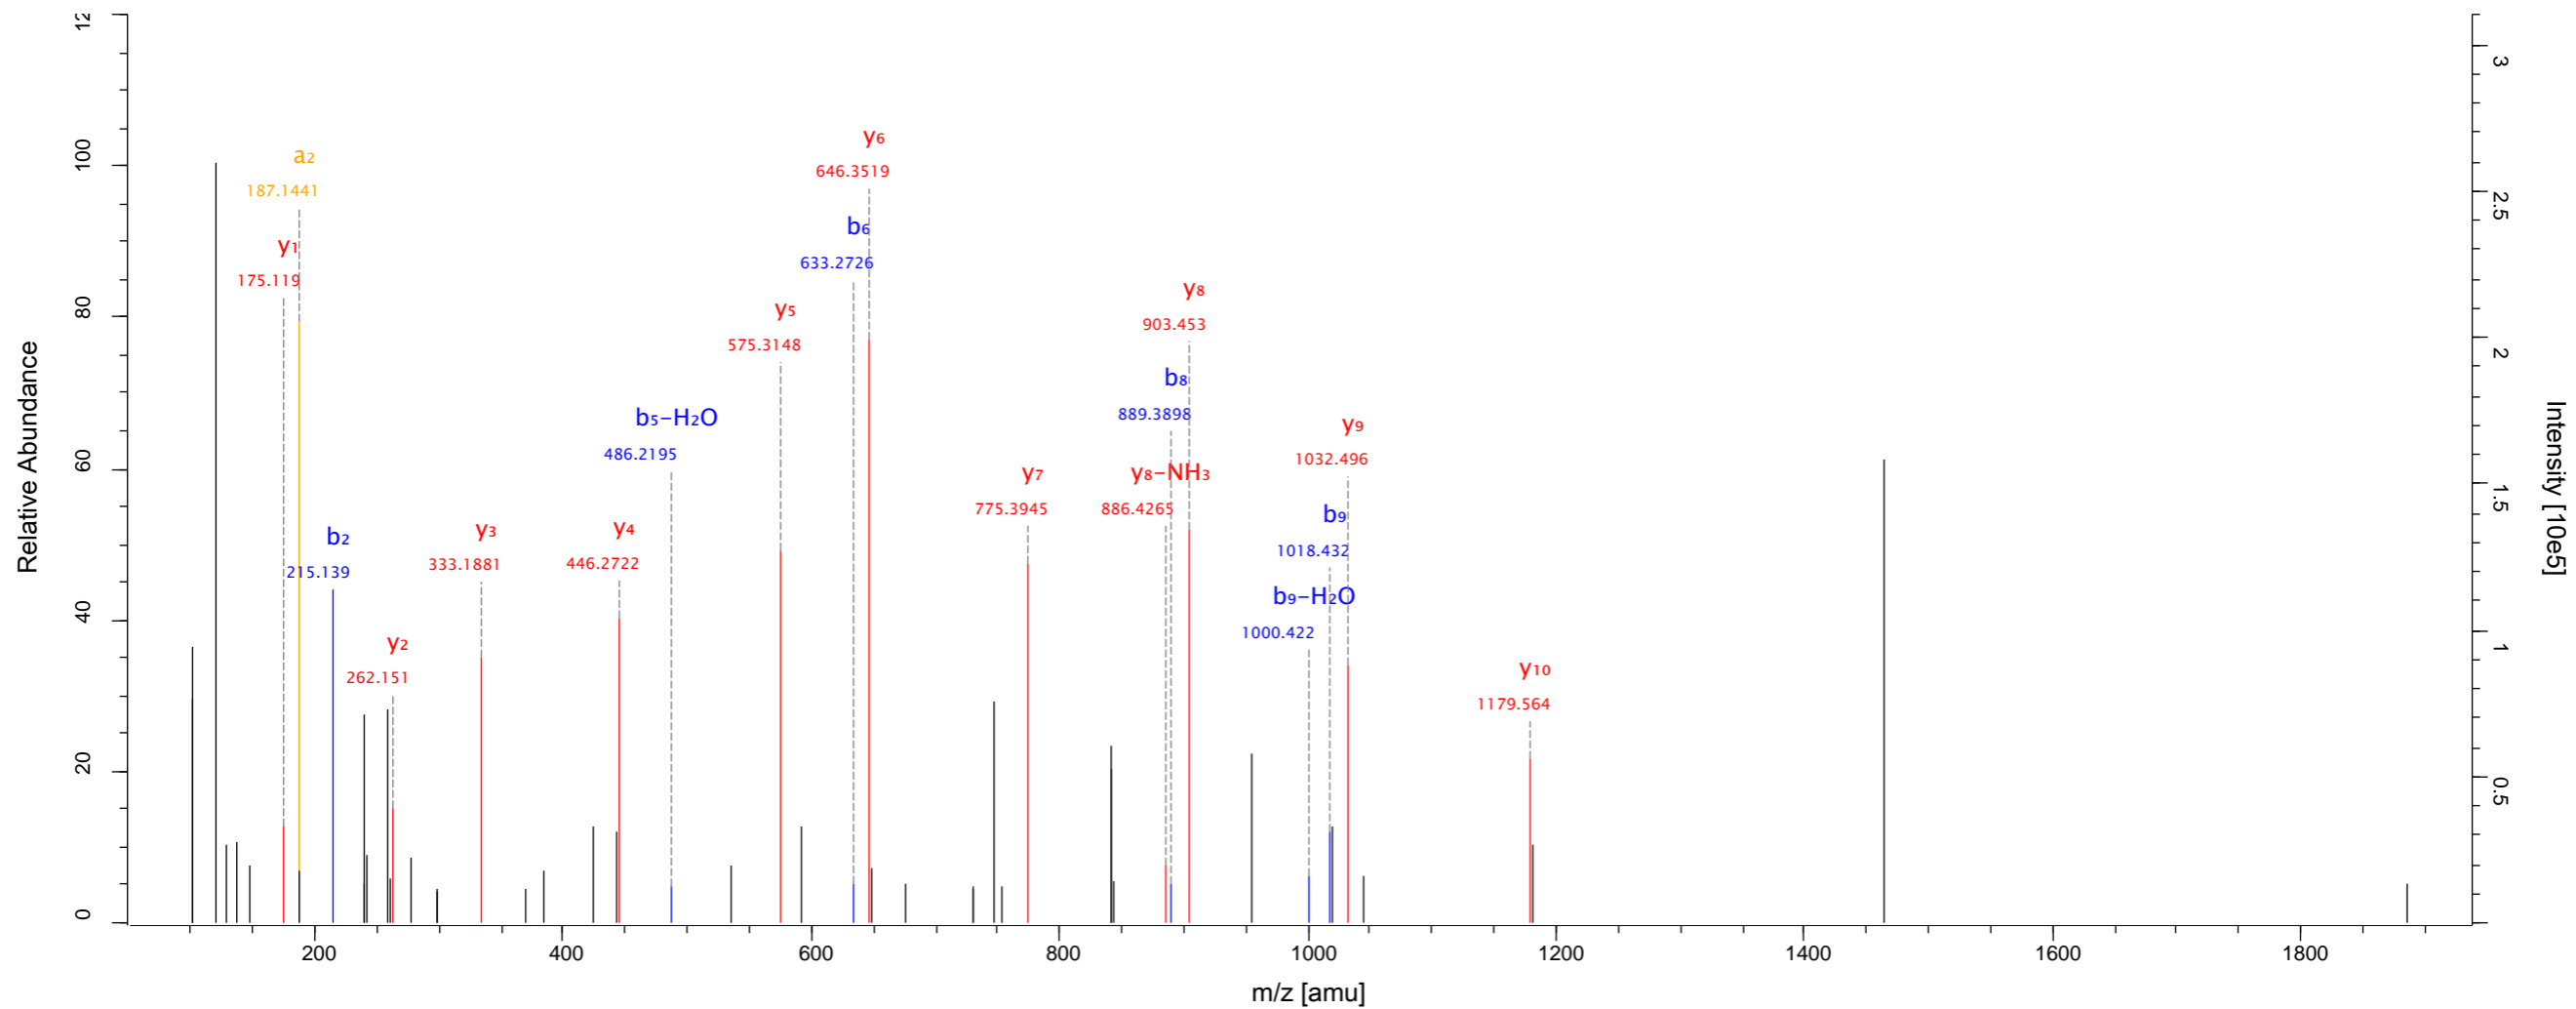

Raw file: 20111212\_EXQ5\_AnMi\_QC\_HCMVp1\_26  
 Scan number: 38904  
 Protein: ORFL27C - NC\_006273.2[7912,13003]- <unknown description>; ORFL27C.iORF1 - NC\_006273.2[7912,8184]- <unknown description>  
 Peptide score: 166.34  
 Method: FTMS; HCD

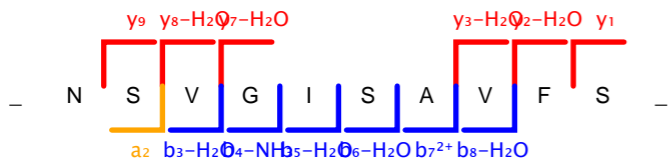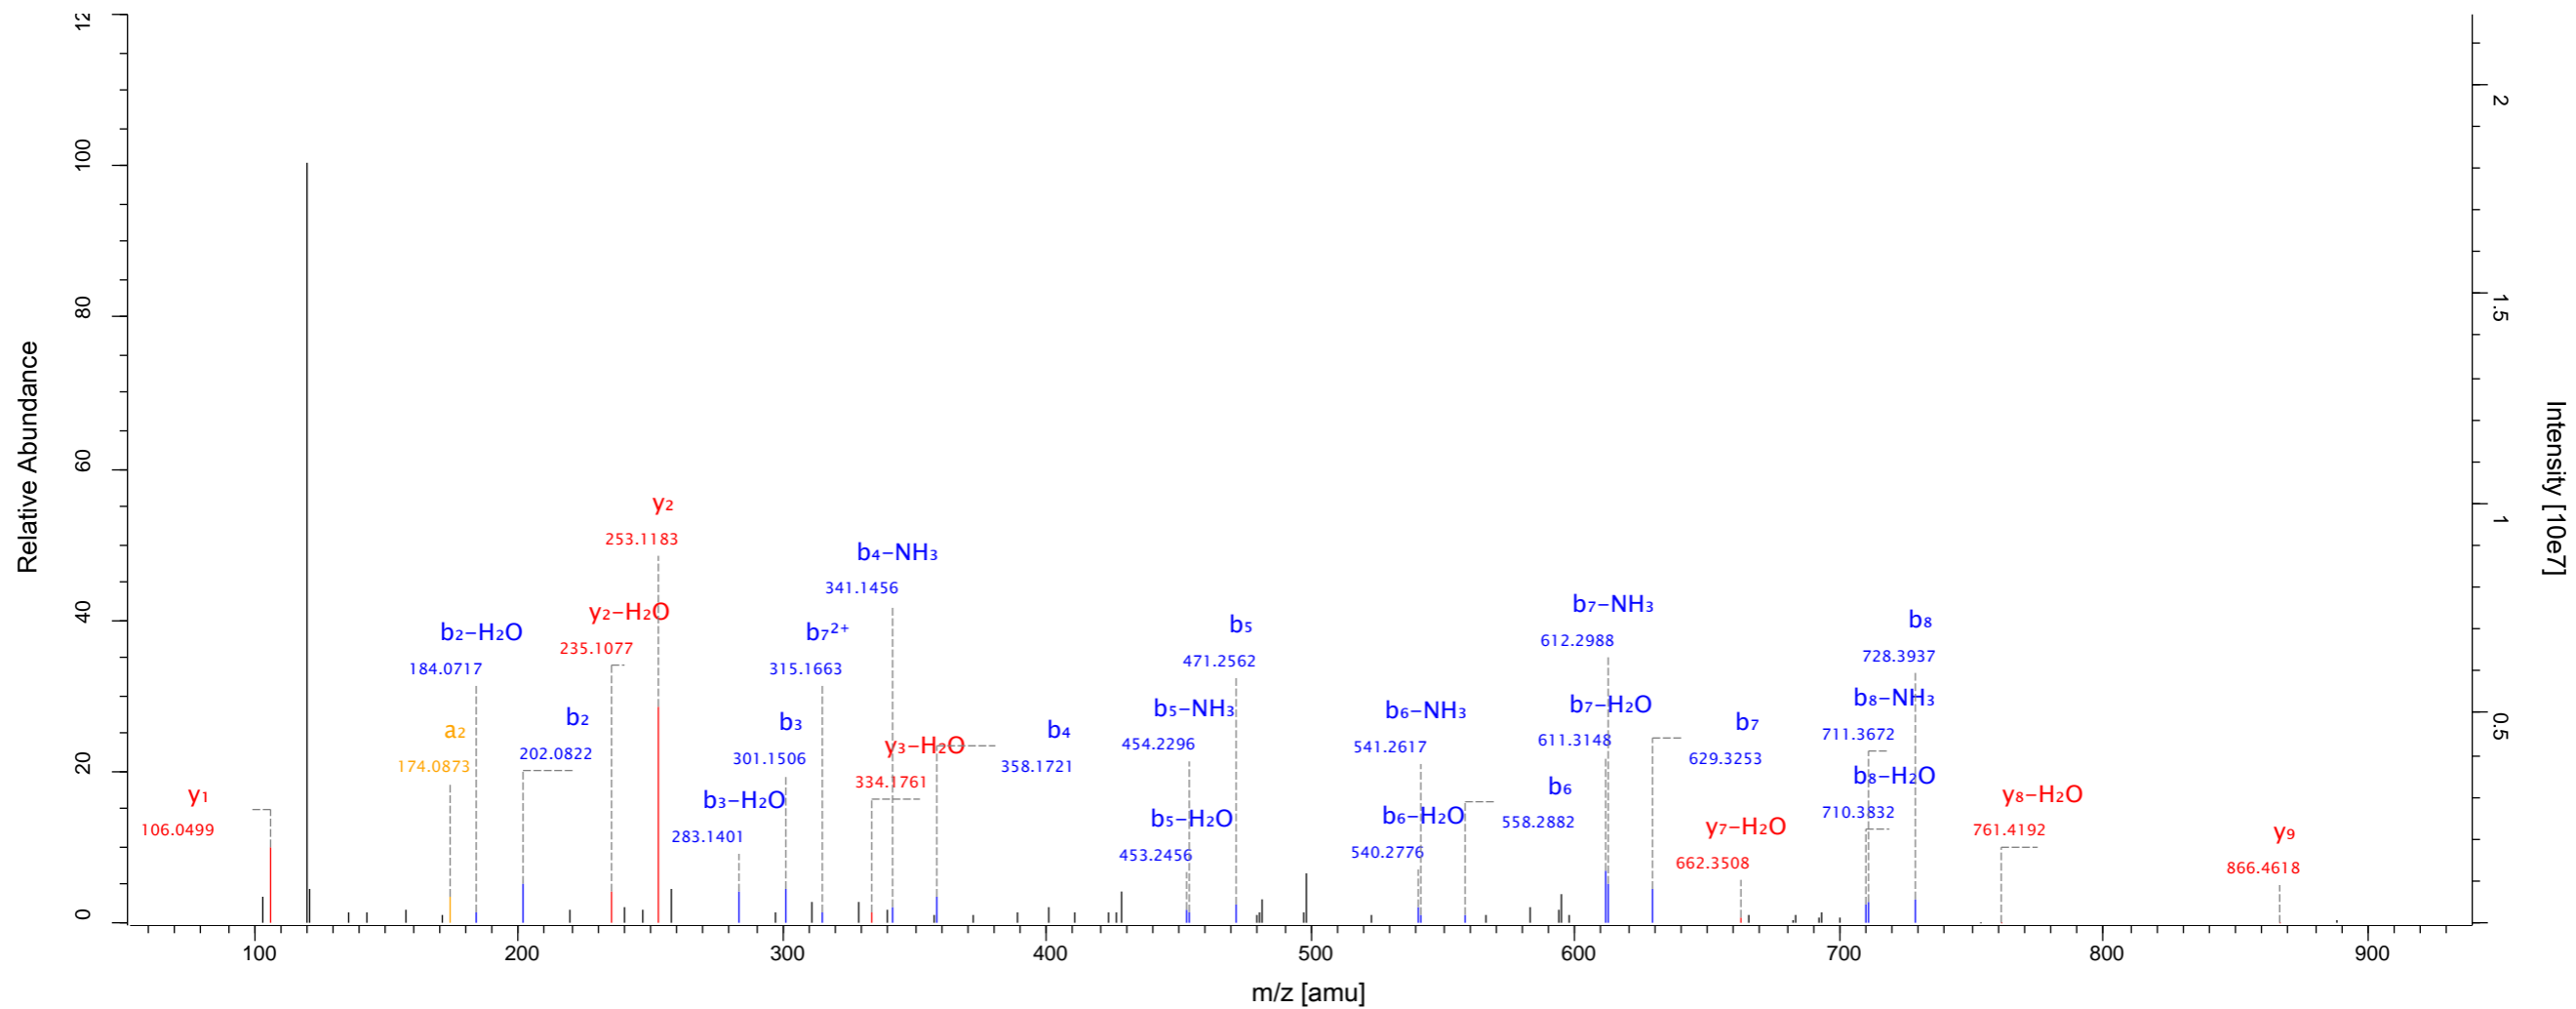

Raw file: 20111212\_EXQ5\_AnMi\_QC\_HCMVp1\_26  
Scan number: 42885  
Protein: ORFL151C - NC\_006273.2[92499,92870]- <unknown description>  
Peptide score: 107.67  
Method: FTMS; HCD

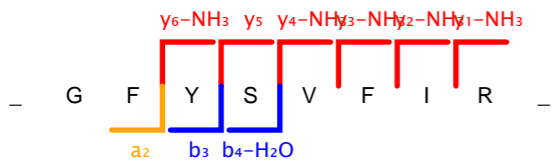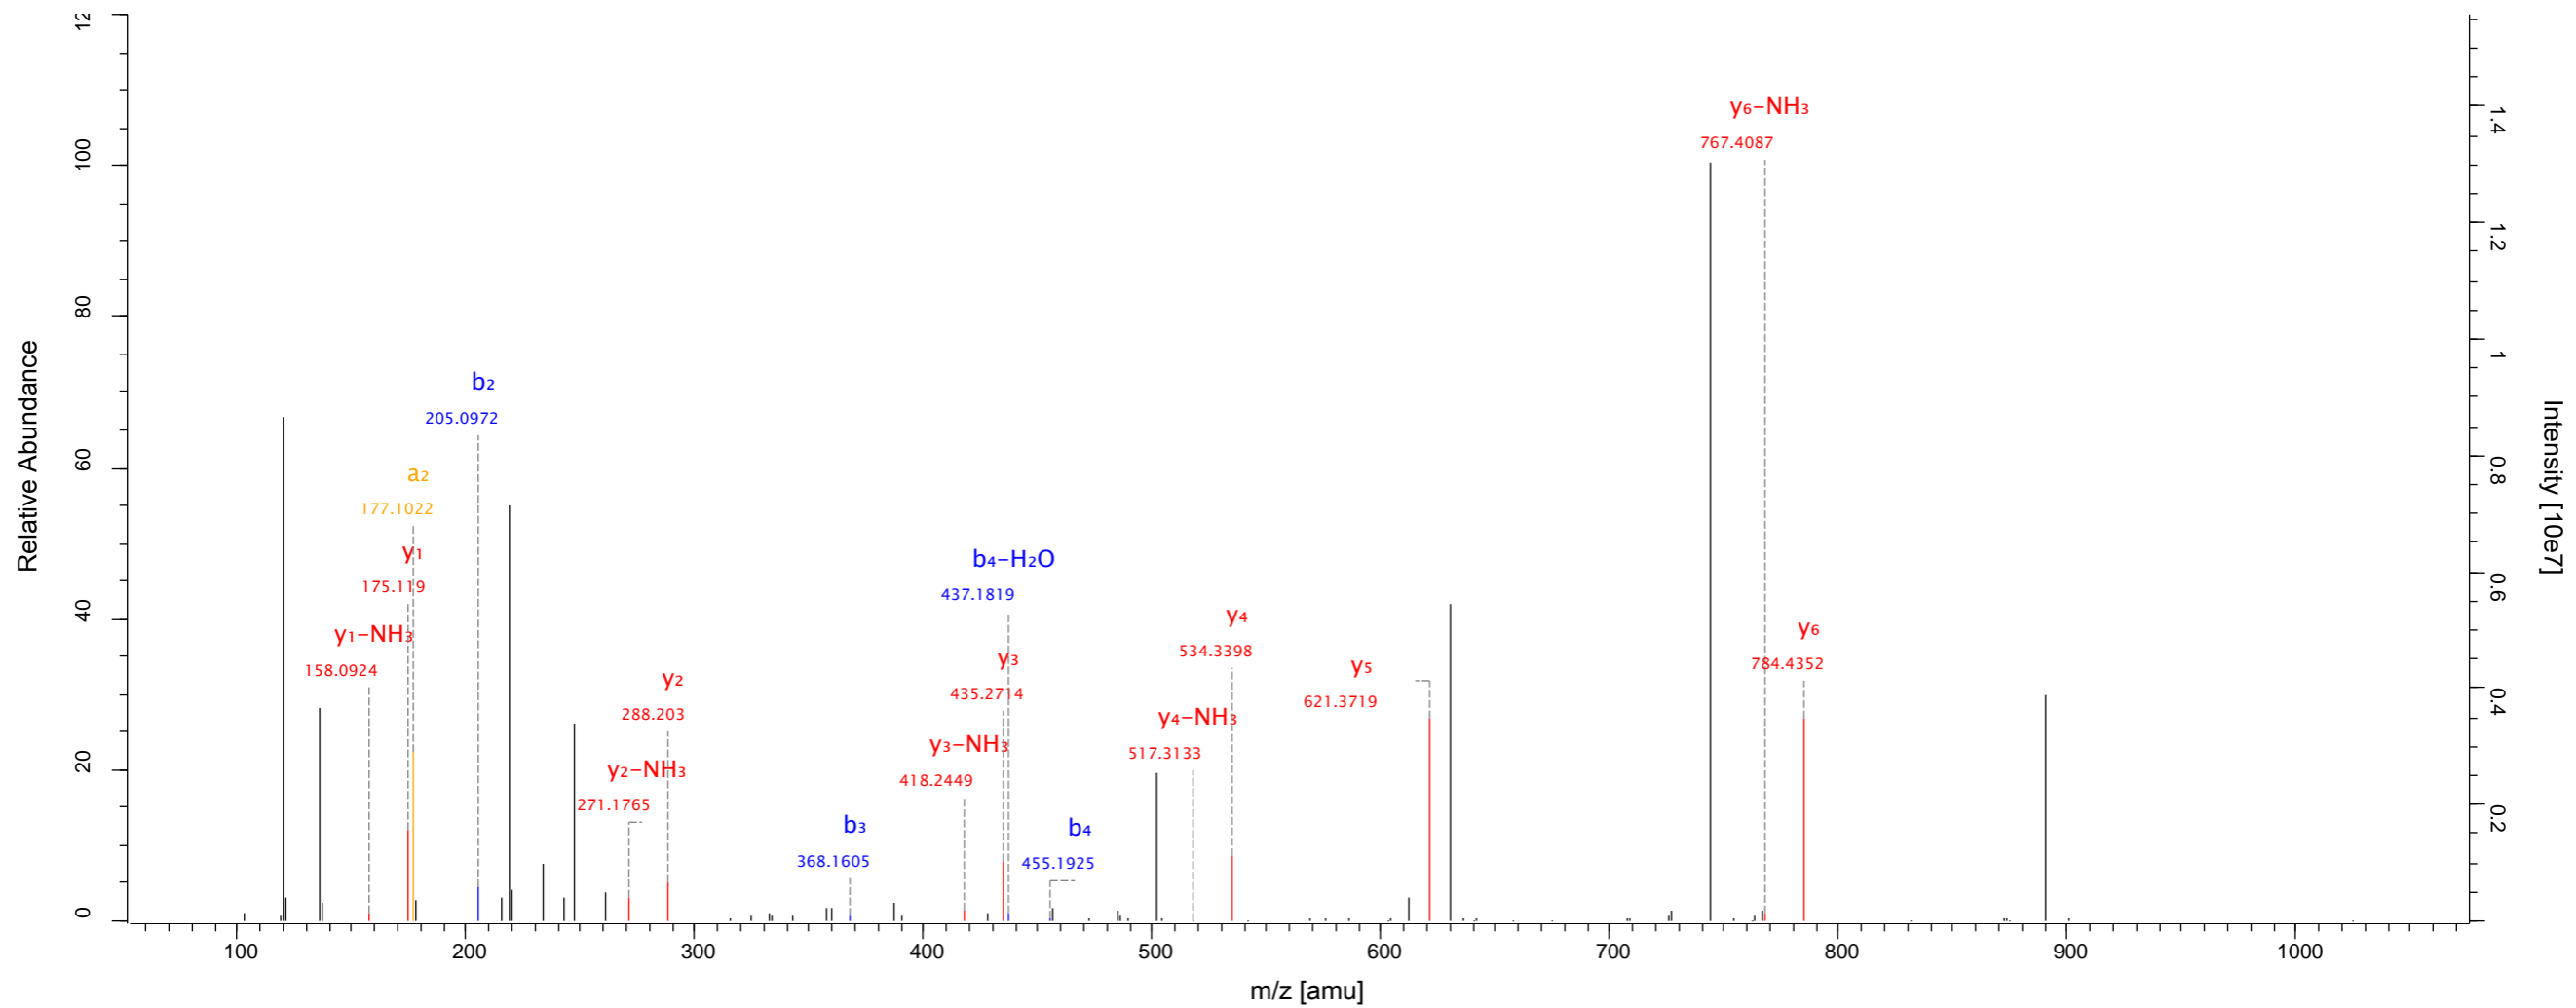

Raw file: 20111212\_EXQ5\_AnMi\_QC\_HCMVp11\_26  
Scan number: 43214  
Protein: ORFS343C.iORF1 - NC\_006273.2[210869,211213]- <unknown description>  
Peptide score: 62.92  
Method: FTMS; HCD

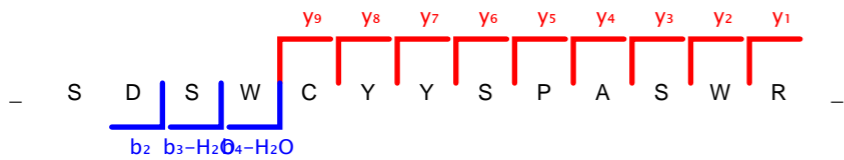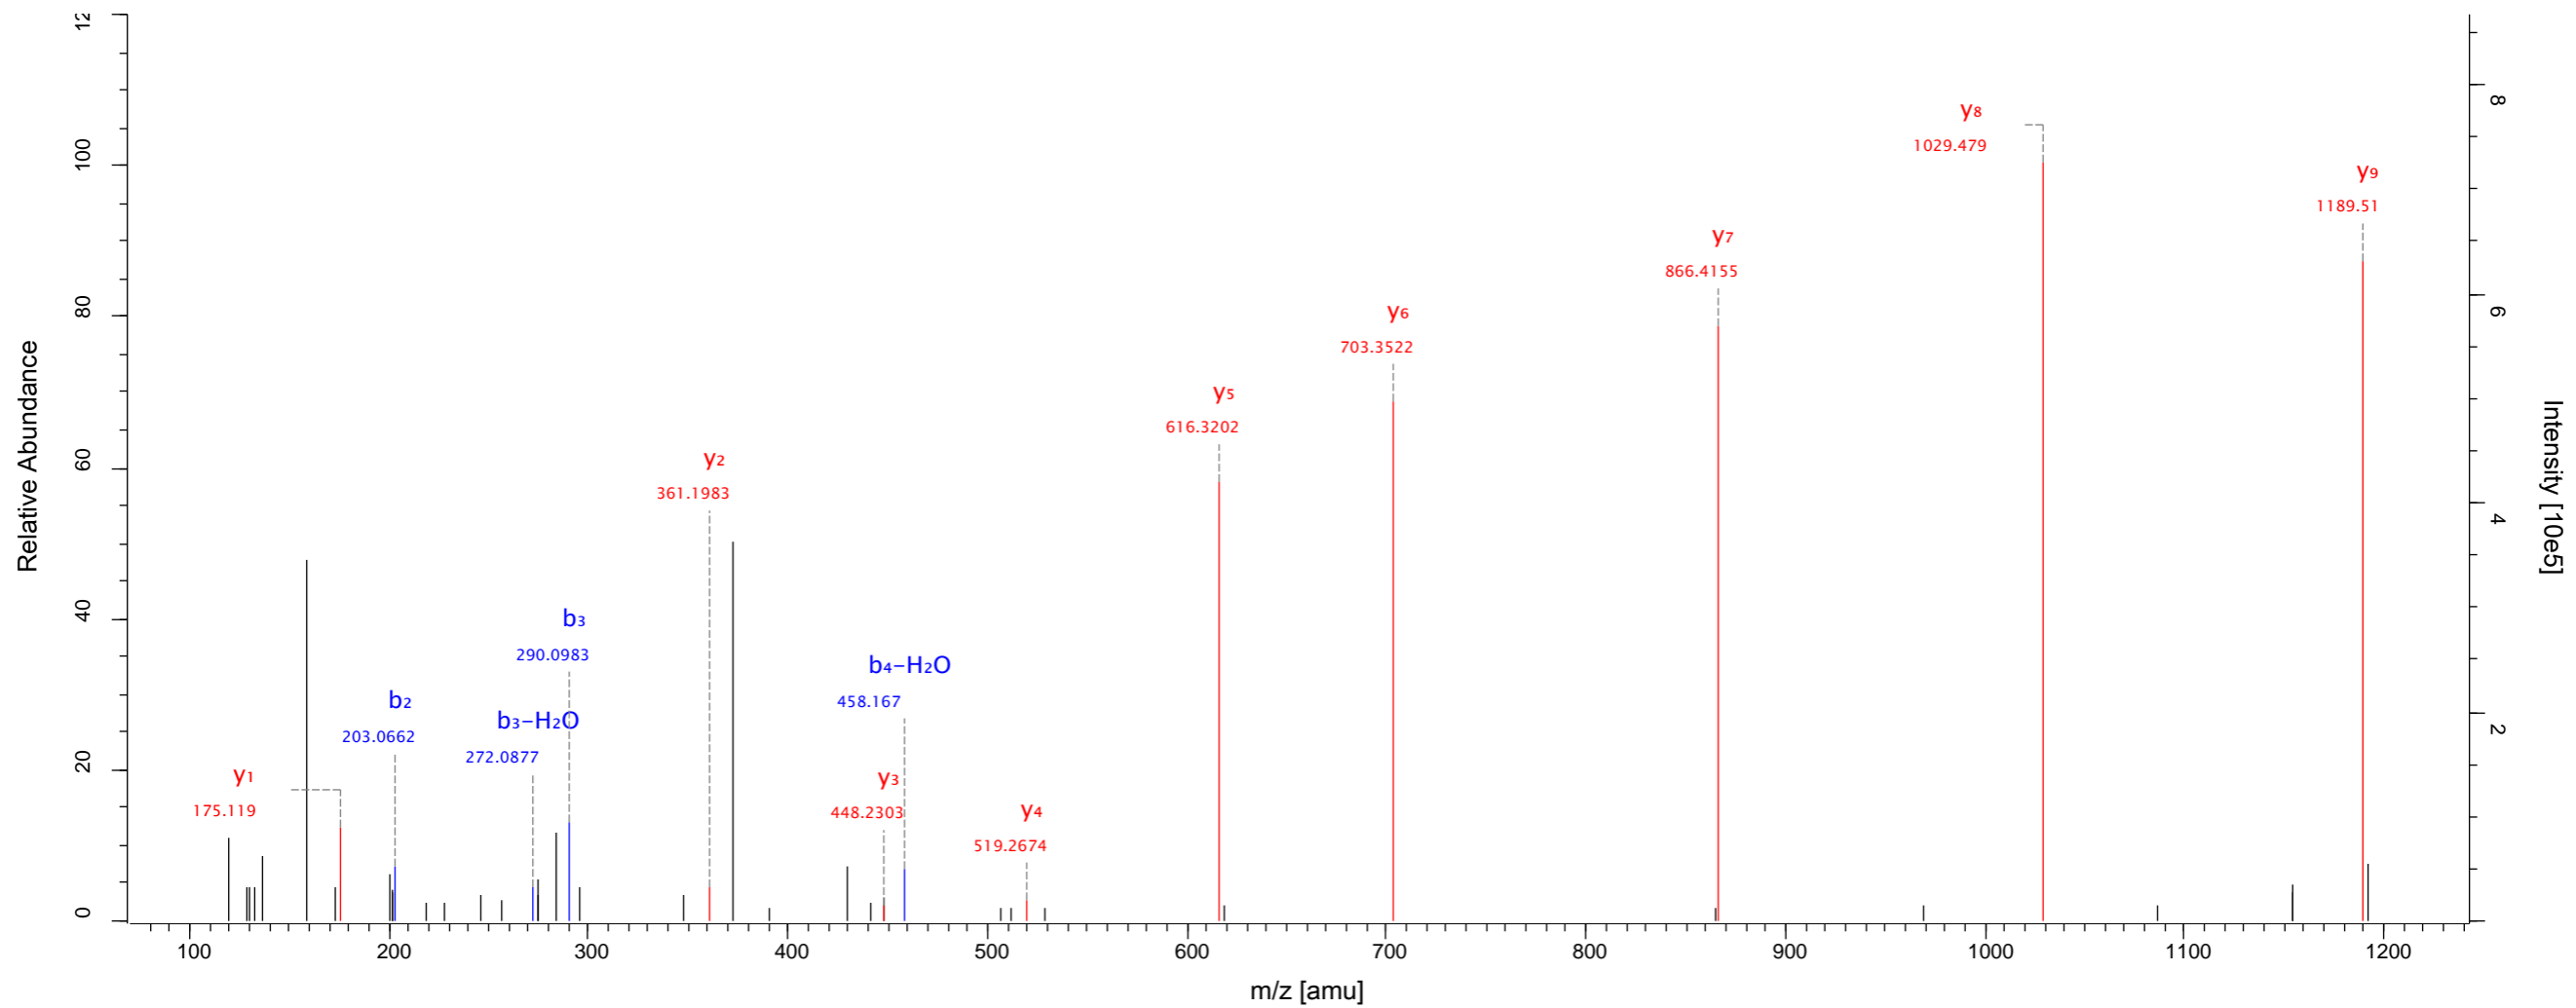



Raw file: 20111212\_EXQ5\_AnMi\_QC\_HCMVpI1\_26  
Scan number: 49562  
Protein: ORFL26W + NC\_006273.2[12923,13093]+ <unknown description>  
Peptide score: 59.23  
Method: FTMS; HCD

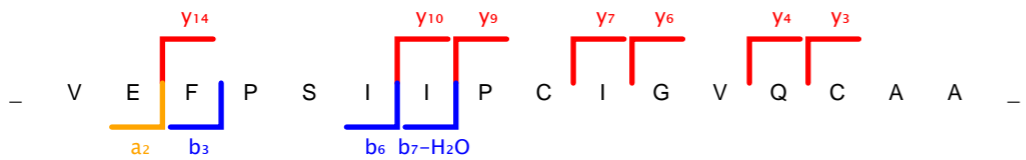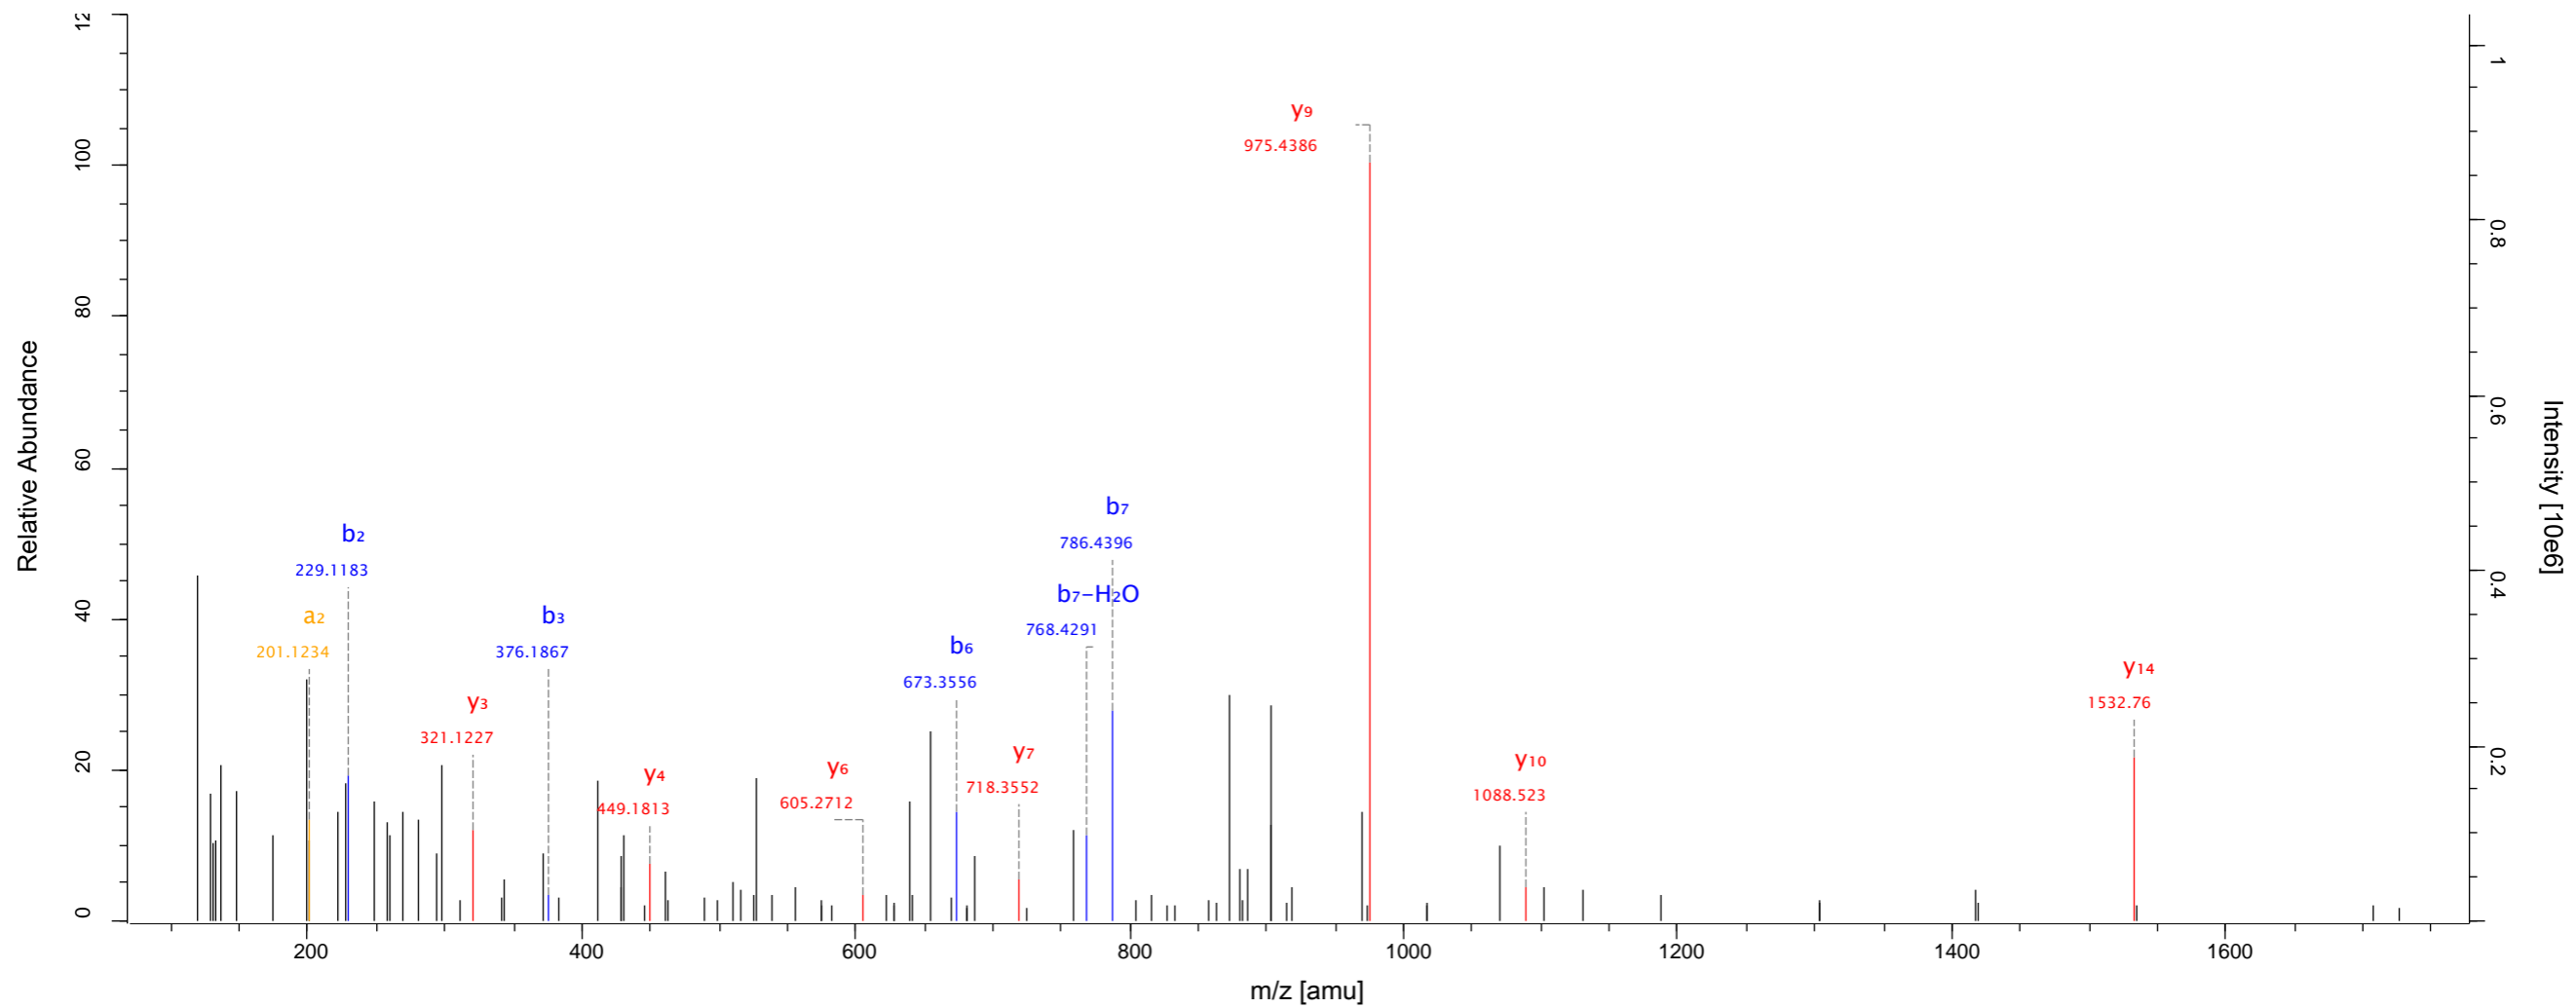

Raw file: 20111212\_EXQ5\_AnMi\_QC\_HCMVp1\_26  
 Scan number: 50039  
 Protein: ORFL223W + NC\_006273.2[139458,139730]+ <unknown description>  
 Peptide score: 178.84  
 Method: FTMS; HCD

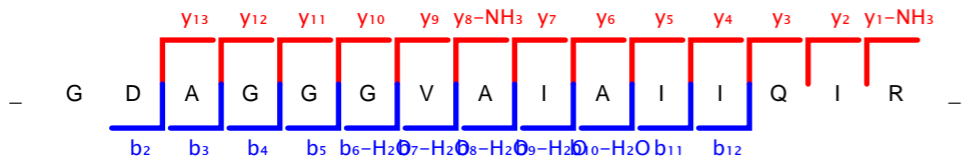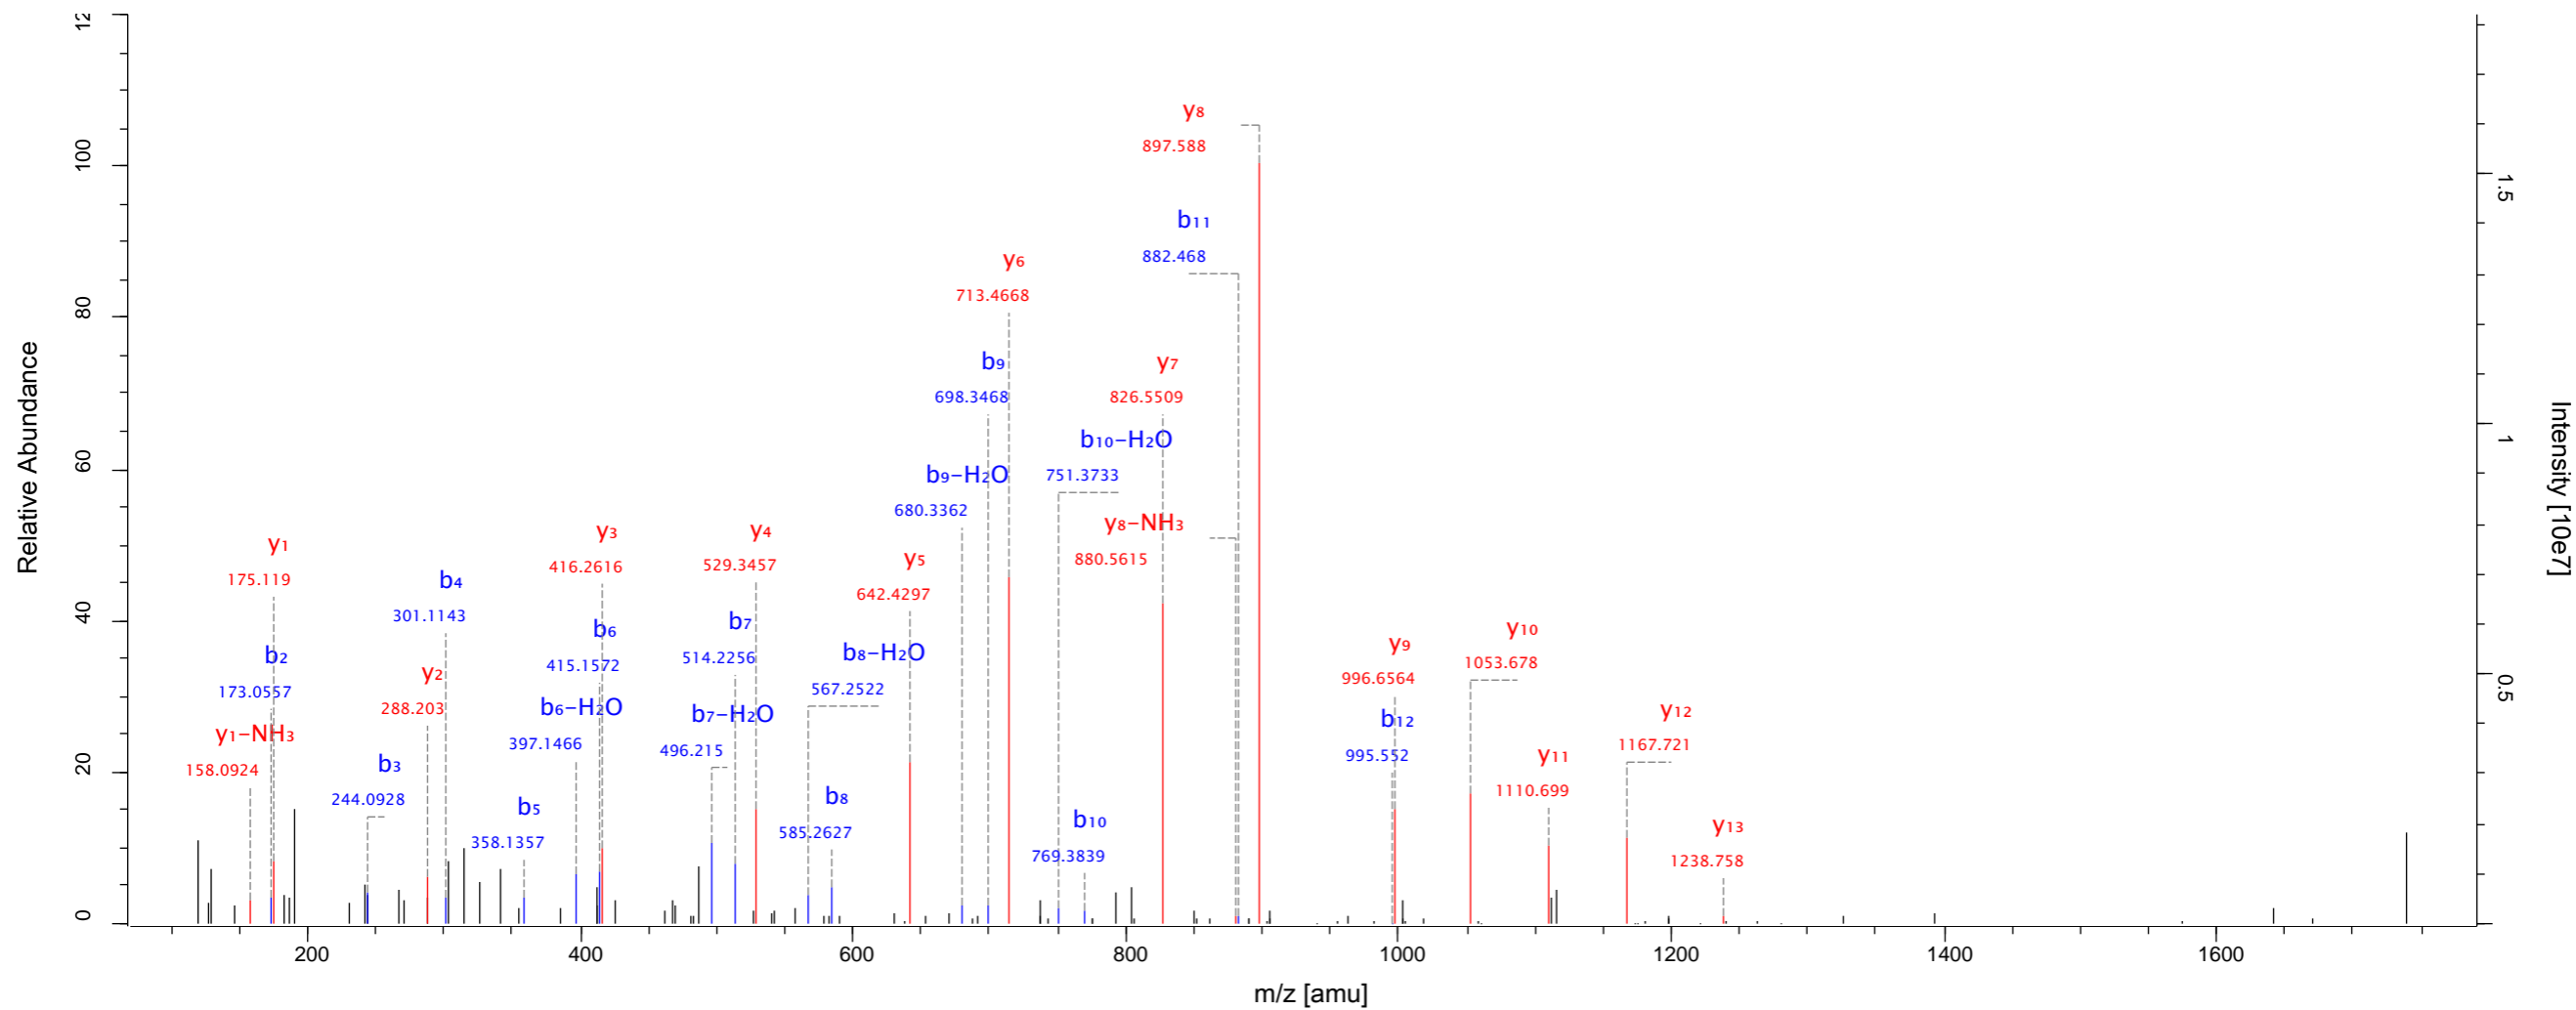

Raw file: 20111212\_EXQ5\_AnMi\_QC\_HCMVp11\_26  
 Scan number: 50423  
 Protein: ORFL88C - NC\_006273.2[37894,38133]- <unknown description>  
 Peptide score: 150.68  
 Method: FTMS; HCD

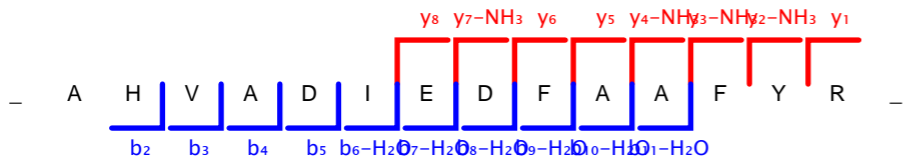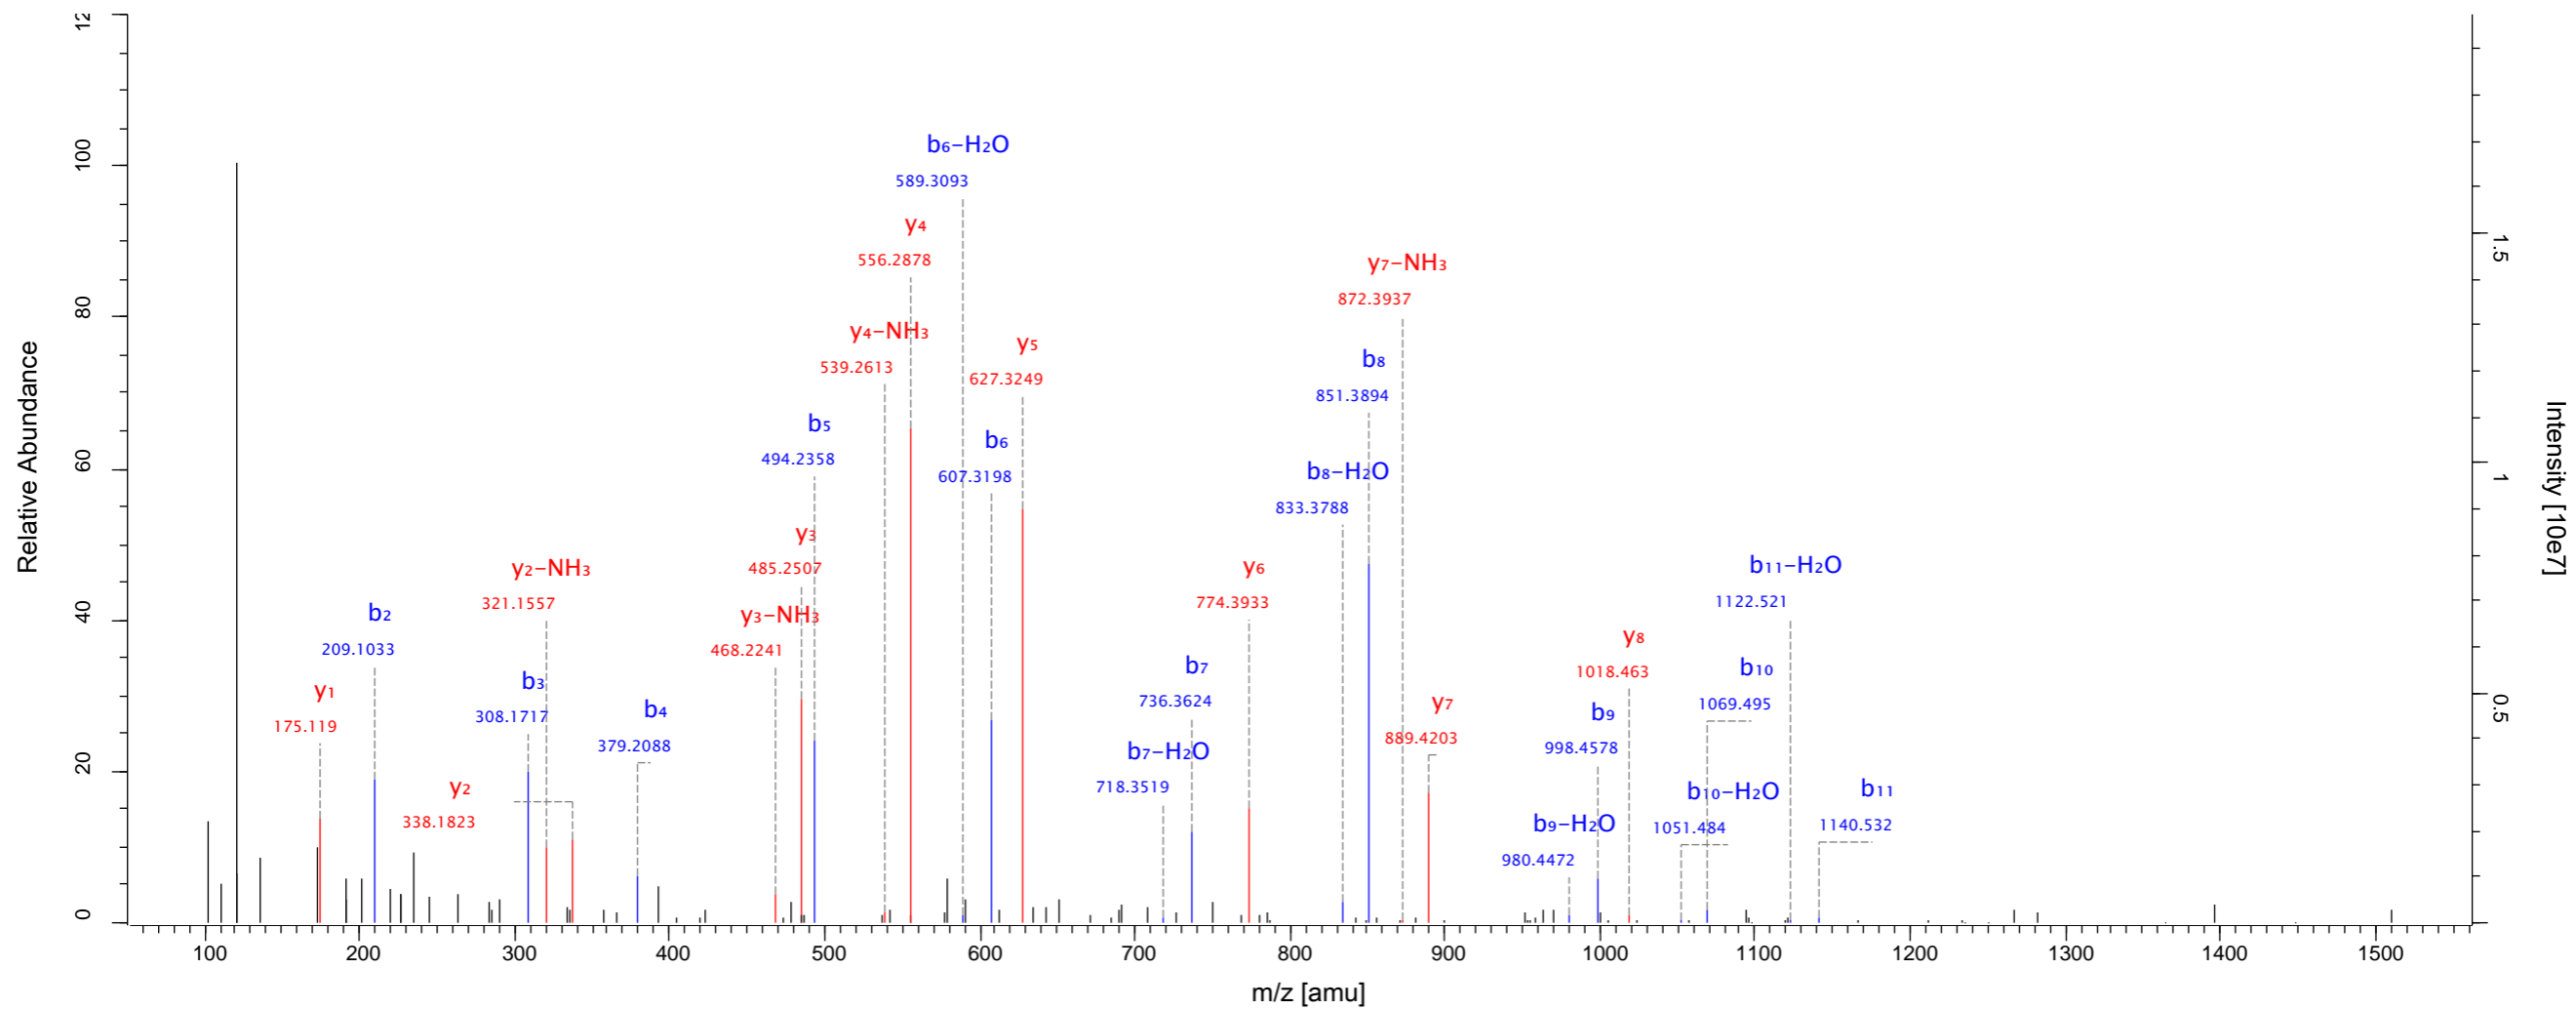

Raw file: 20111212\_EXQ5\_AnMi\_QC\_HCMVp11\_26  
Scan number: 6247  
Protein: ORFL301C - NC\_006273.2[185358,185666]- <unknown description>  
Peptide score: 110.87  
Method: FTMS; HCD

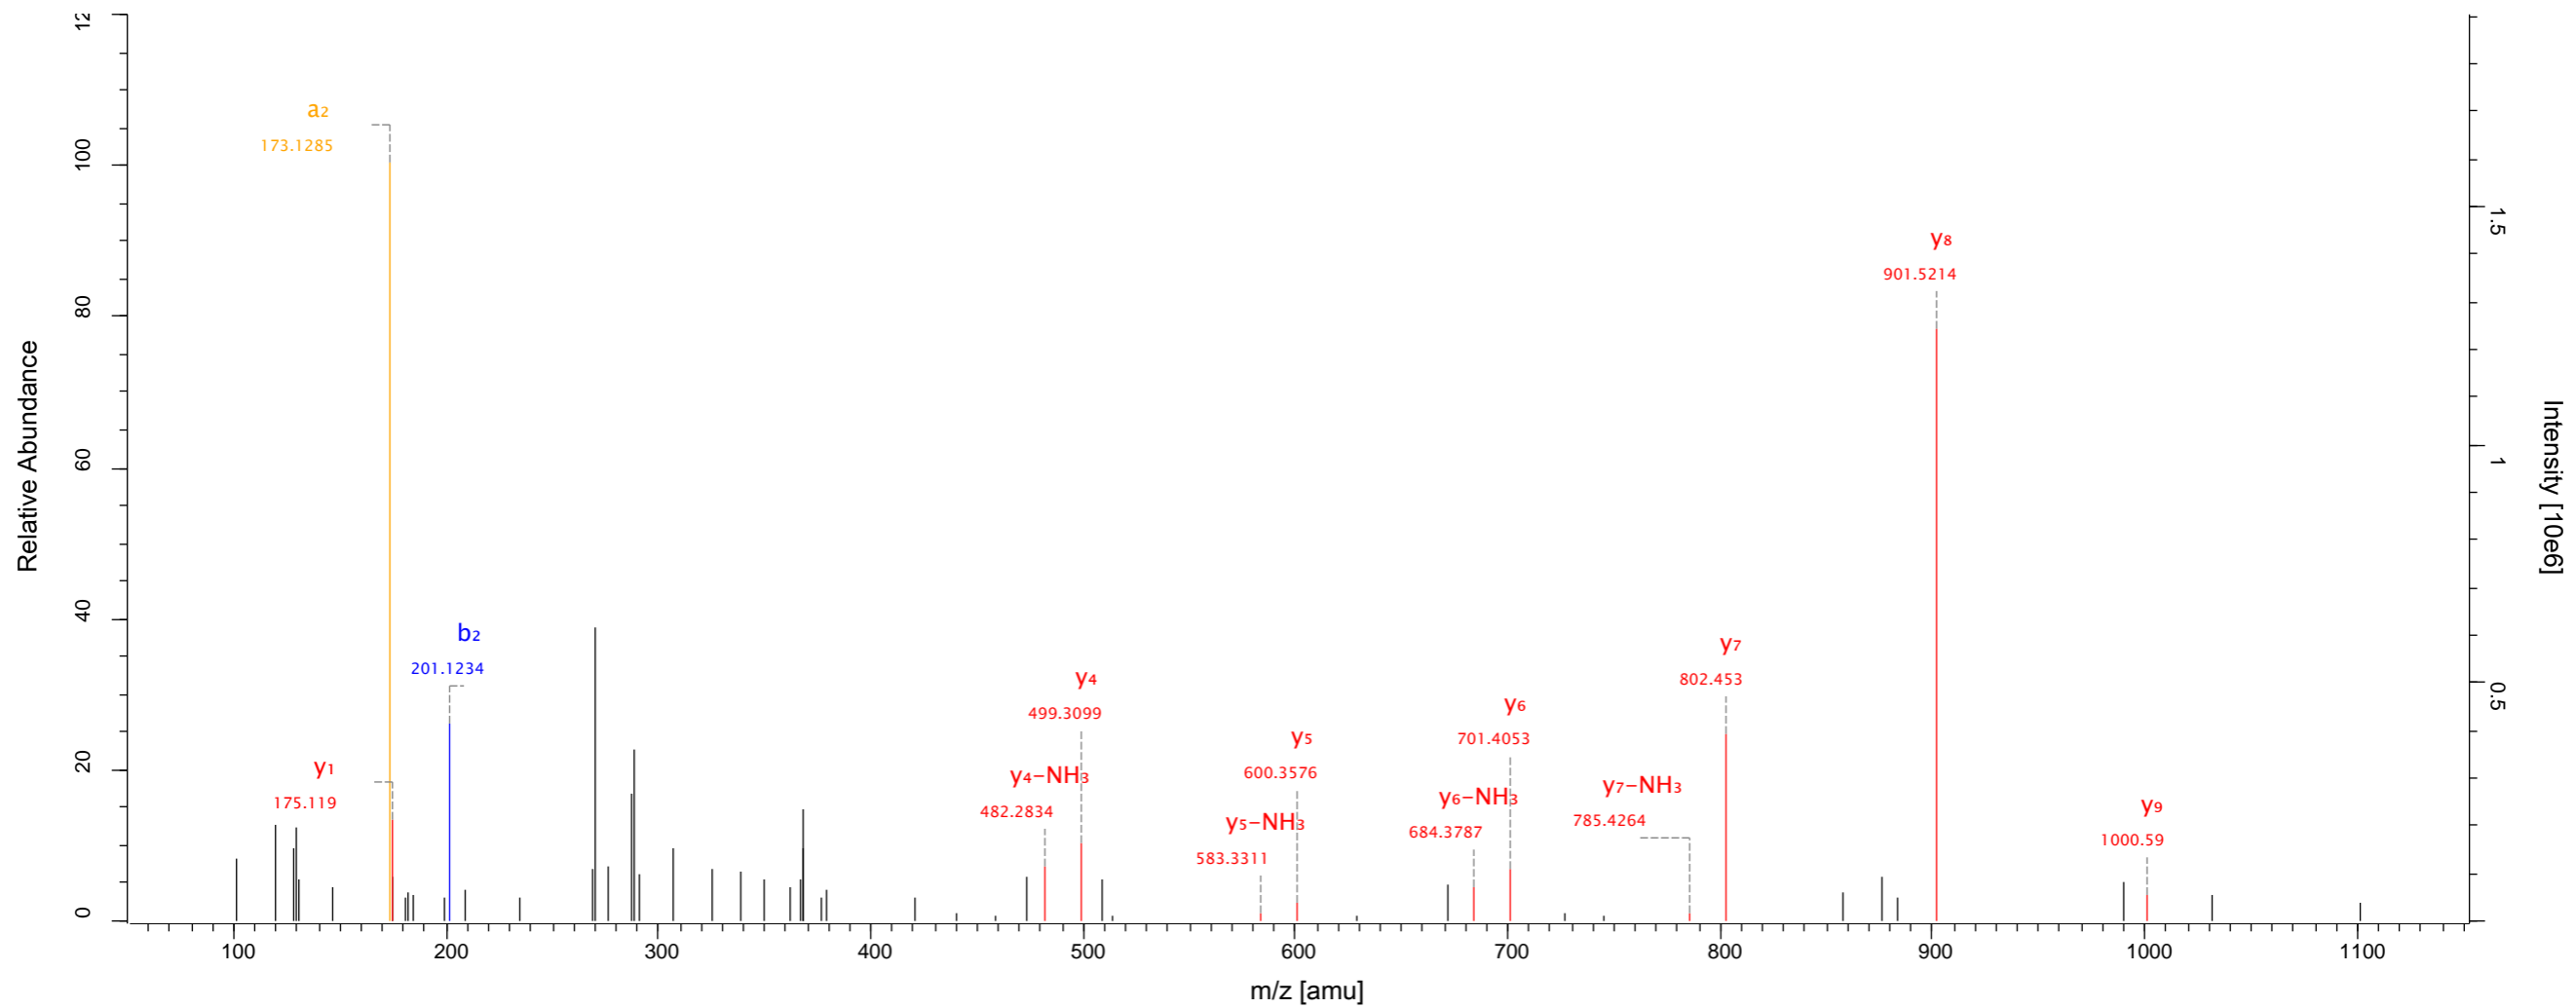

Raw file: 20111212\_EXQ5\_AnMi\_QC\_HCMVp1\_26  
Scan number: 7508  
Protein: ORFL47W.iORF1 + NC\_006273.2[21305,21601]+ <unknown description>  
Peptide score: 101.95  
Method: FTMS; HCD

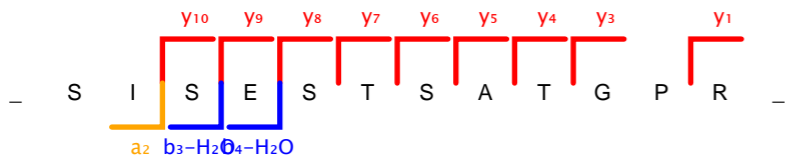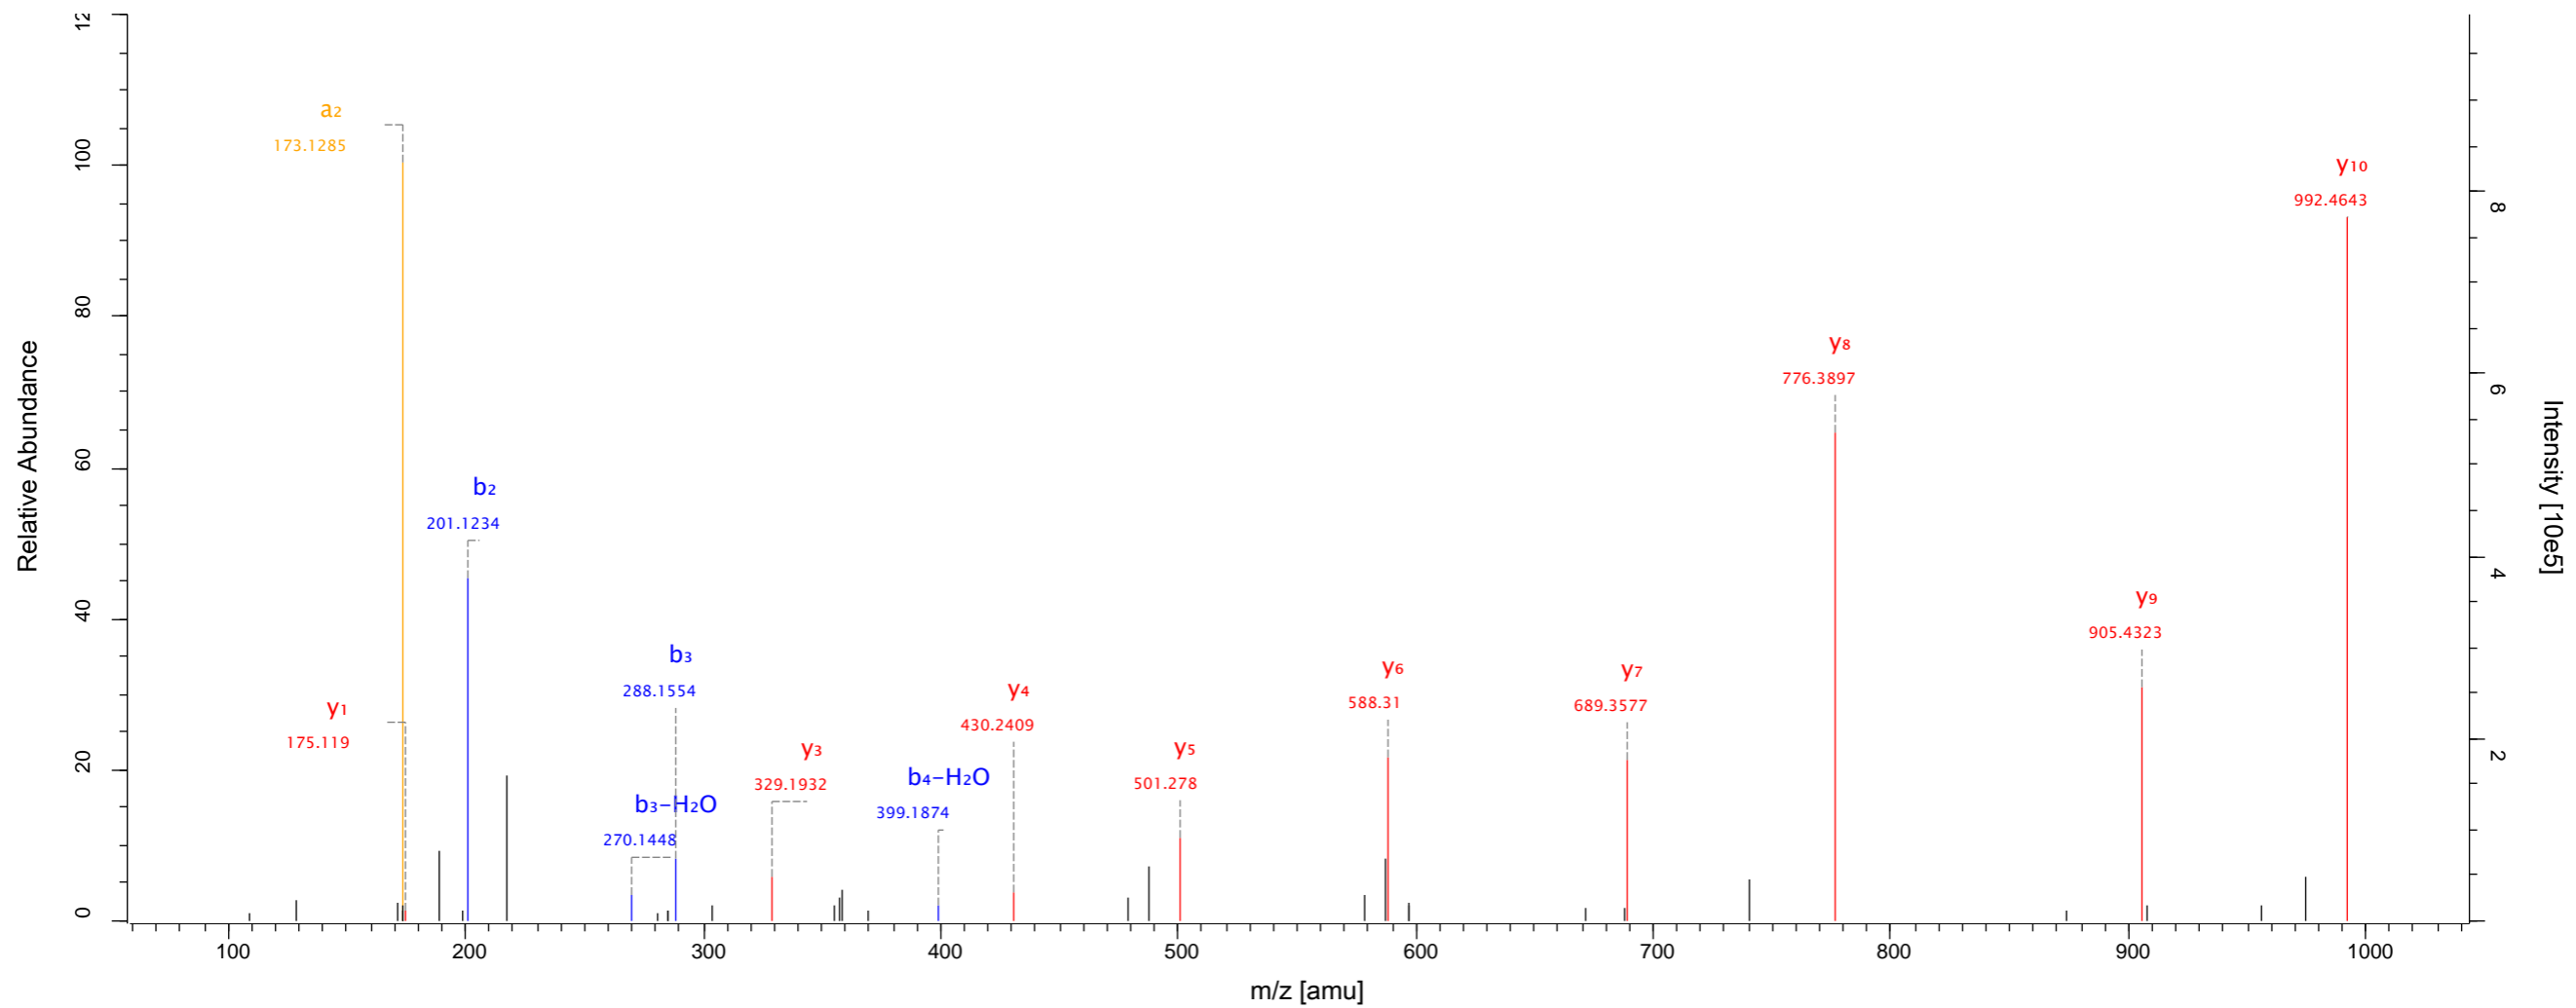

Raw file: 20111212\_EXQ5\_AnMi\_QC\_HCMVp1\_26  
Scan number: 8446  
Protein: ORFL271C.iORF1 - NC\_006273.2[176607,176858]- <unknown description>  
Peptide score: 116.52  
Method: FTMS; HCD

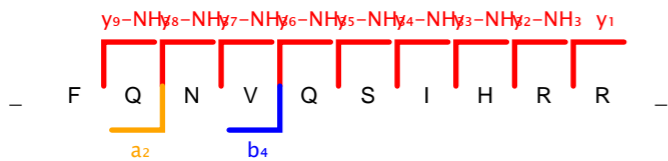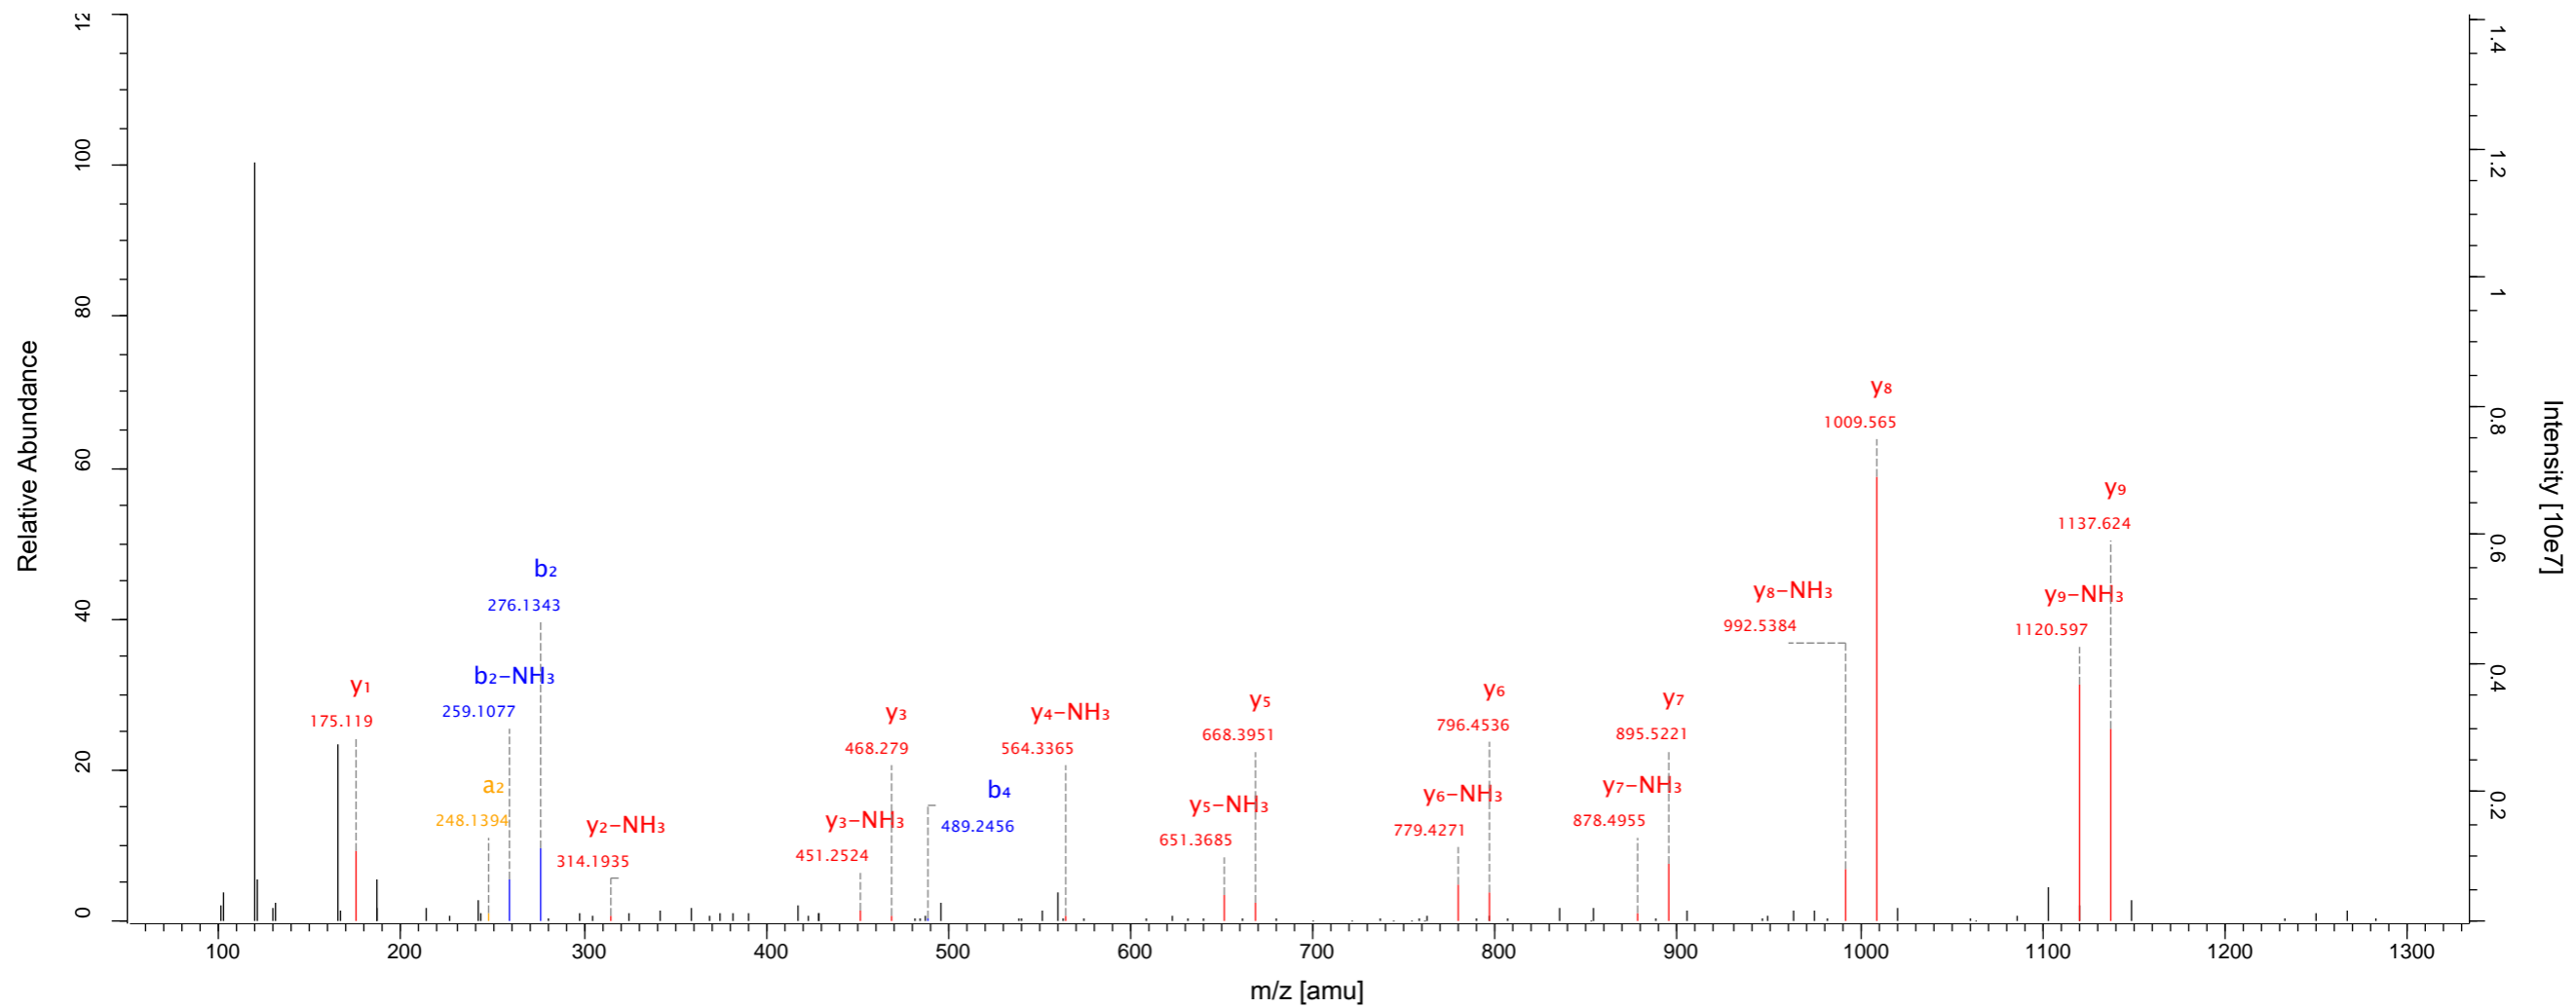

Raw file: 20111212\_EXQ5\_AnMi\_QC\_HCMVp11\_26  
Scan number: 8766  
Protein: ORFL88C - NC\_006273.2[37894,38133]- <unknown description>; rORF58 - NC\_006273.2[37894,37920]- <unknown description>  
Peptide score: 85.85  
Method: FTMS; HCD

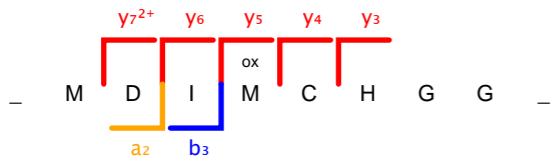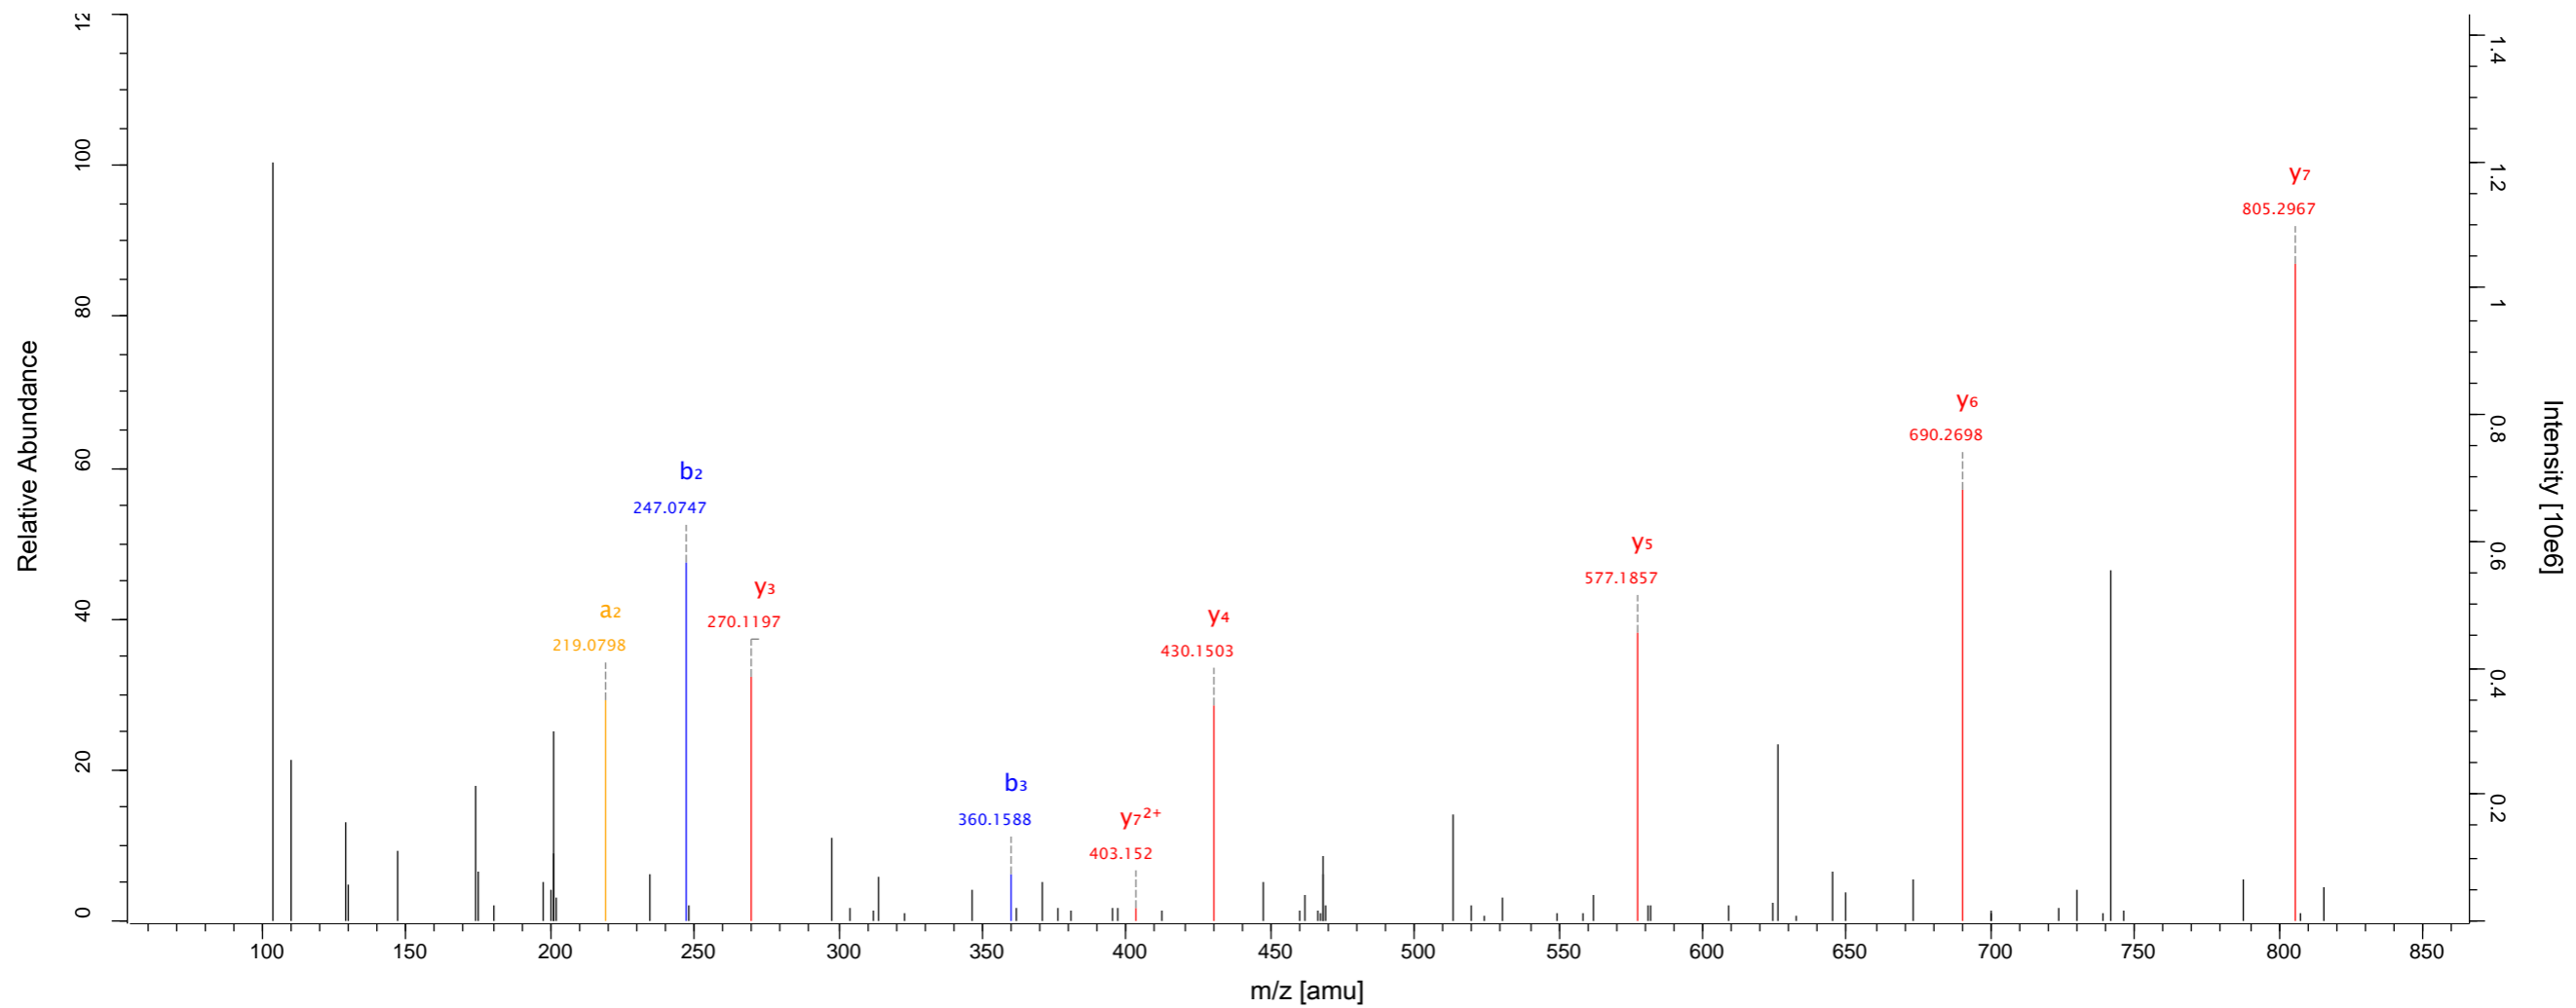

Raw file: 20111212\_EXQ5\_AnMi\_QC\_HCMVp1\_26  
Scan number: 8954  
Protein: ORFL26W + NC\_006273.2[12923,13093]+ <unknown description>  
Peptide score: 158.76  
Method: FTMS; HCD

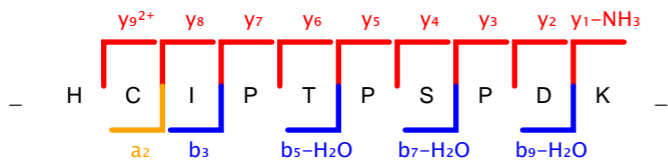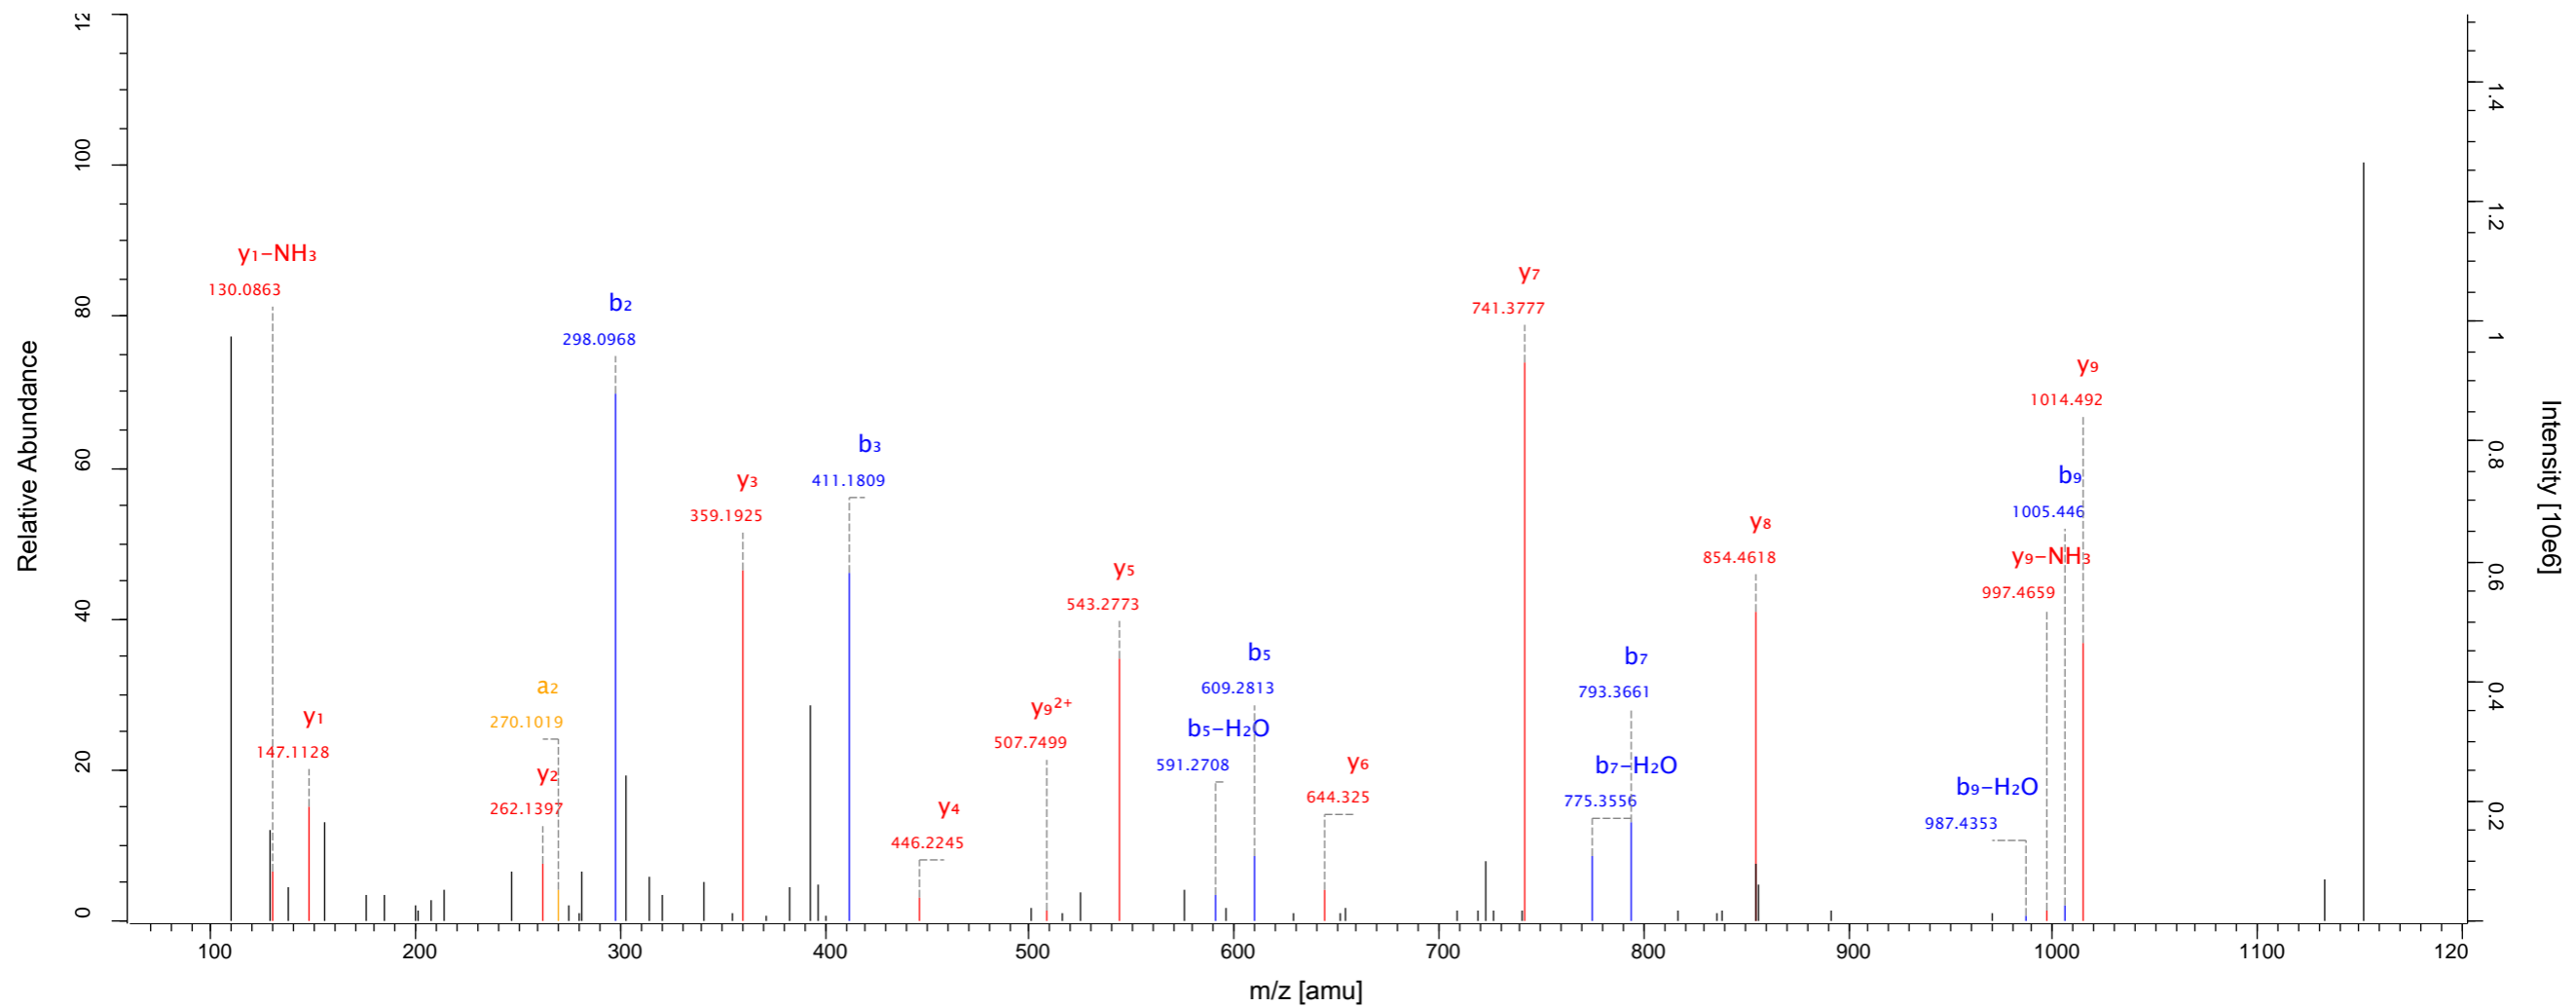



Raw file: 20111212\_EXQ5\_AnMi\_QC\_HCMVp1\_27\_111216192808  
 Scan number: 10302  
 Protein: ORFL147C - NC\_006273.2[85932,87362]- <unknown description>  
 Peptide score: 147.74  
 Method: FTMS; HCD

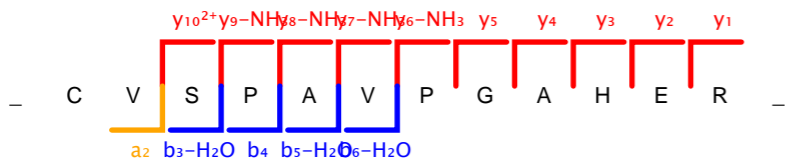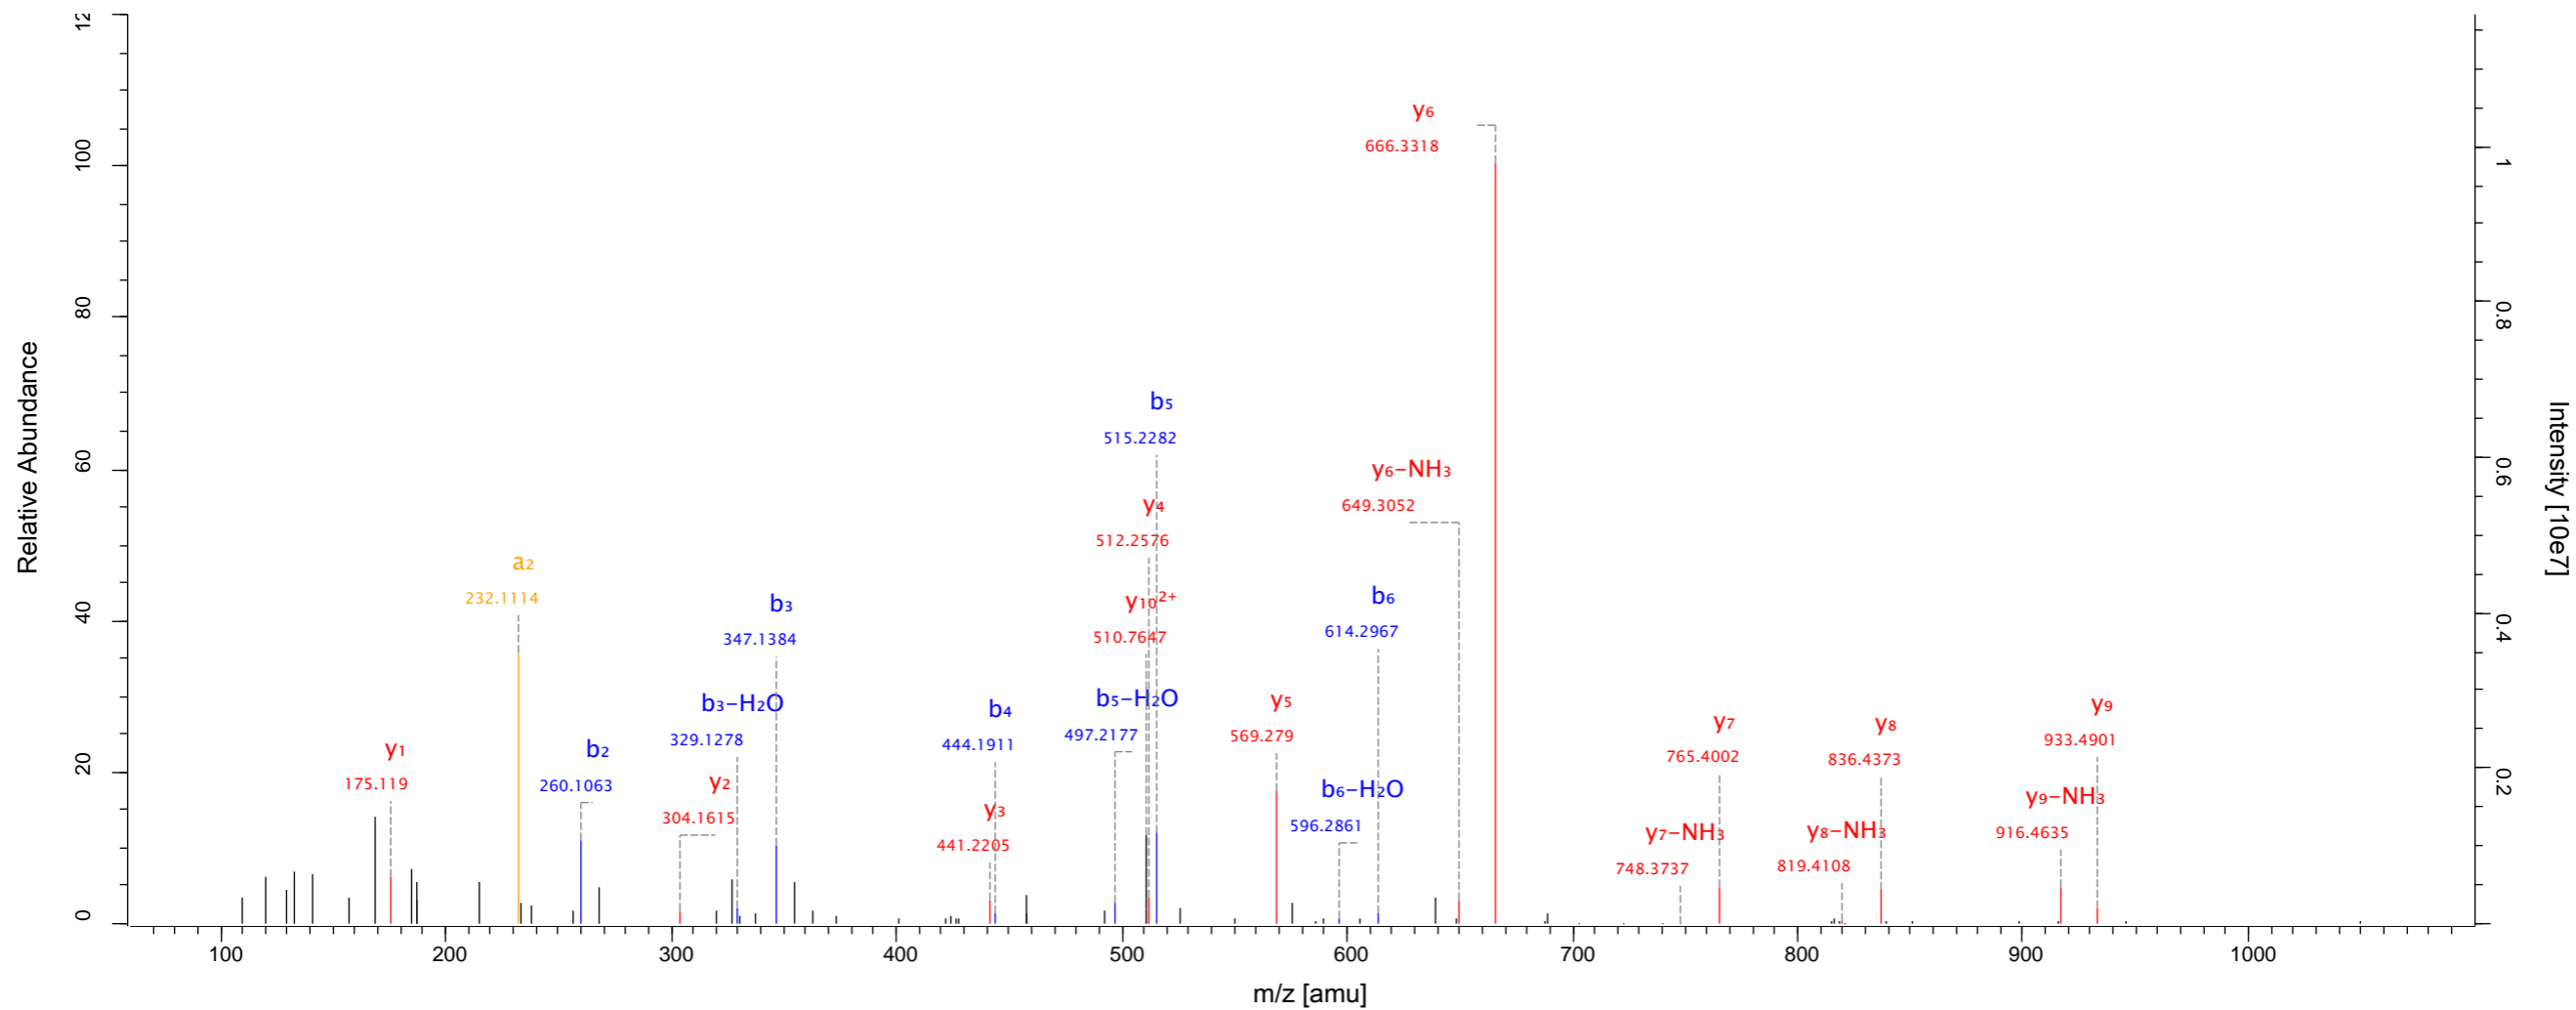

Raw file: 20111212\_EXQ5\_AnMi\_QC\_HCMVp11\_27\_111216192808  
 Scan number: 22630  
 Protein: ORFL253W.iORF1 + NC\_006273.2[161917,163748]+ <unknown description>; ORFL251W + NC\_006273.2[161872,163748]+ <unknown description>  
 Peptide score: 183.36  
 Method: FTMS; HCD

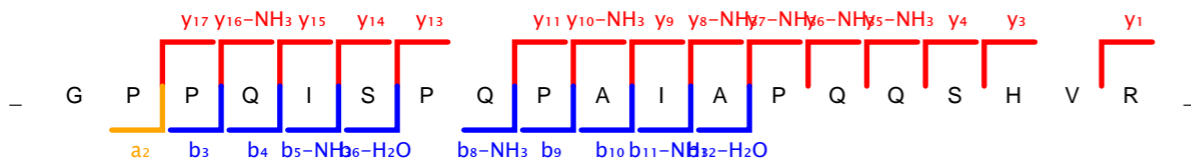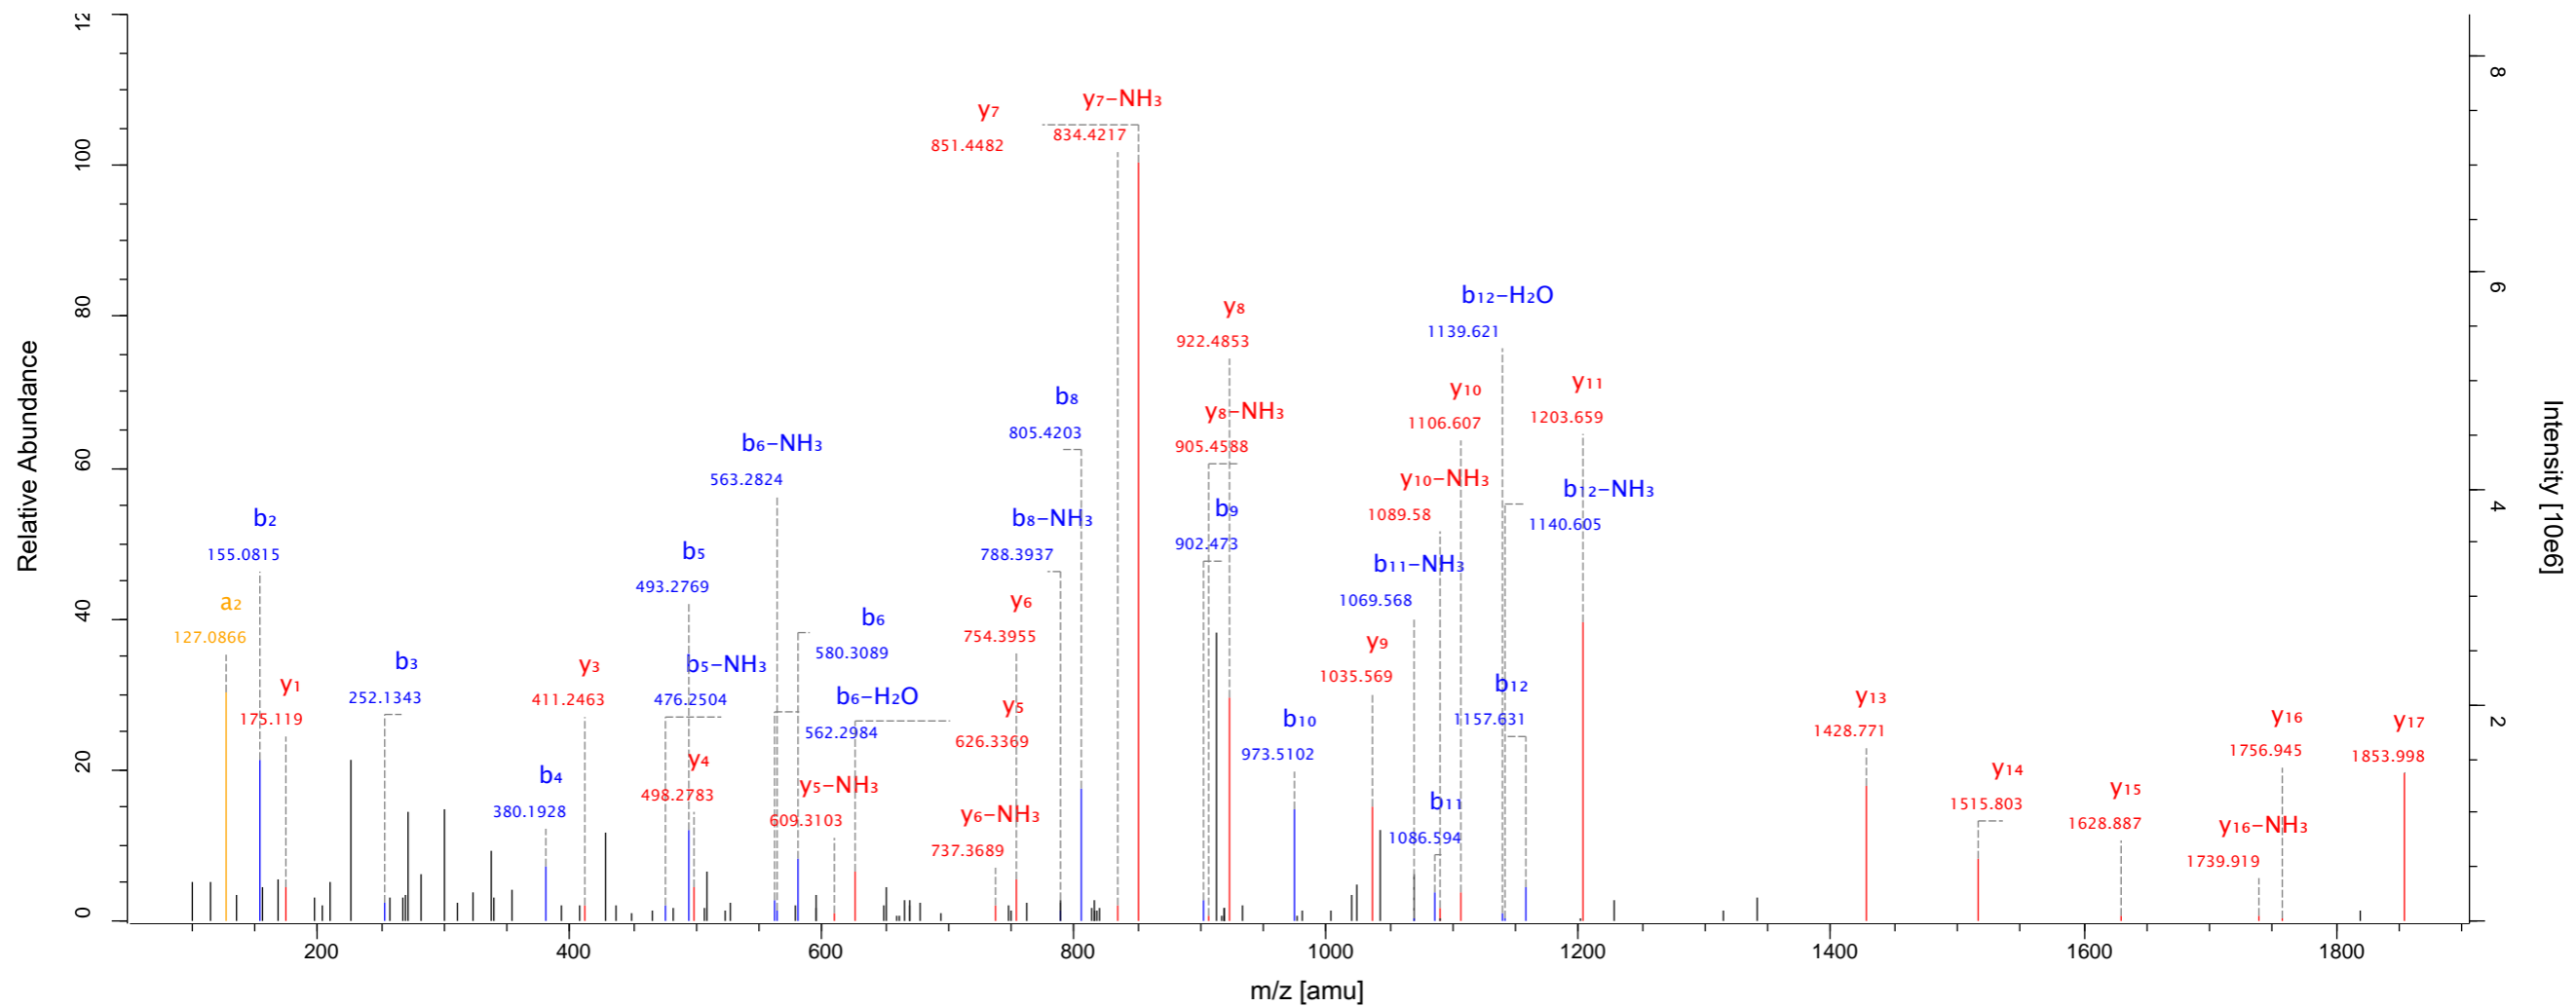

Raw file: 20111212\_EXQ5\_AnMi\_QC\_HCMVp1\_27\_111216192808  
 Scan number: 25420  
 Protein: ORFL86W + NC\_006273.2[38059,38538]+ <unknown description>  
 Peptide score: 135.1  
 Method: FTMS; HCD

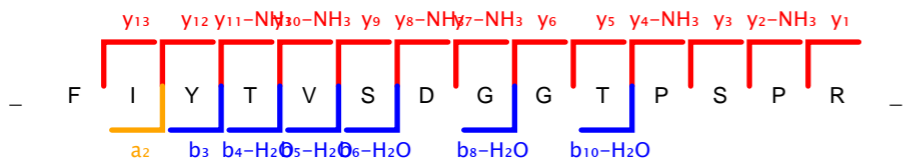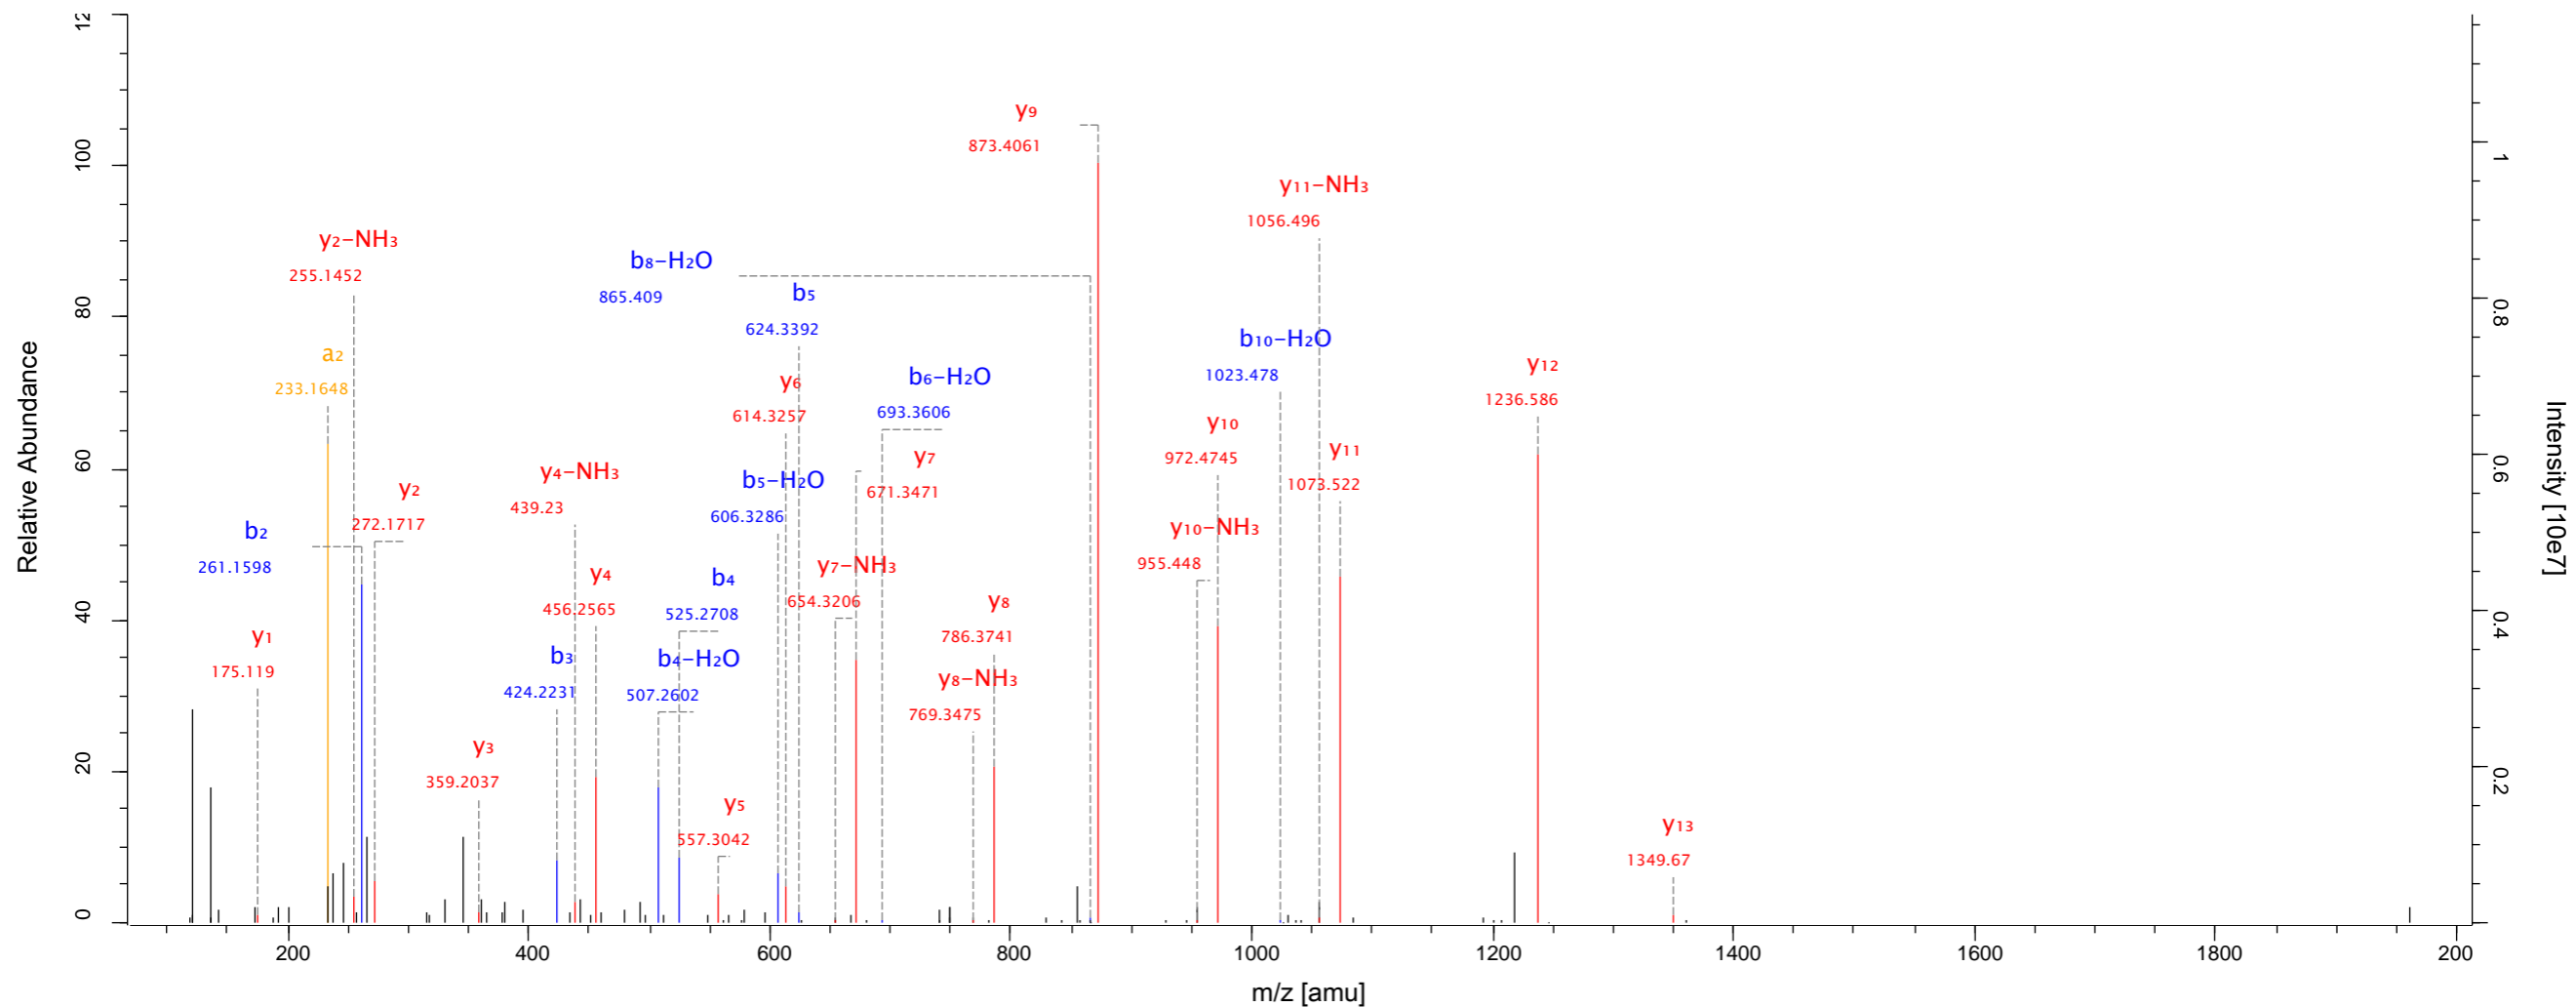

Raw file: 20111212\_EXQ5\_AnMi\_QC\_HCMVpl1\_27\_111216192808  
Scan number: 26124  
Protein: ORFS365W + NC\_006273.2[225950,226606]+ <unknown description>  
Peptide score: 119.53  
Method: FTMS; HCD

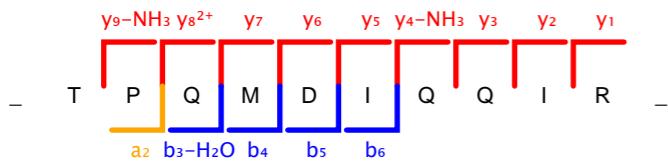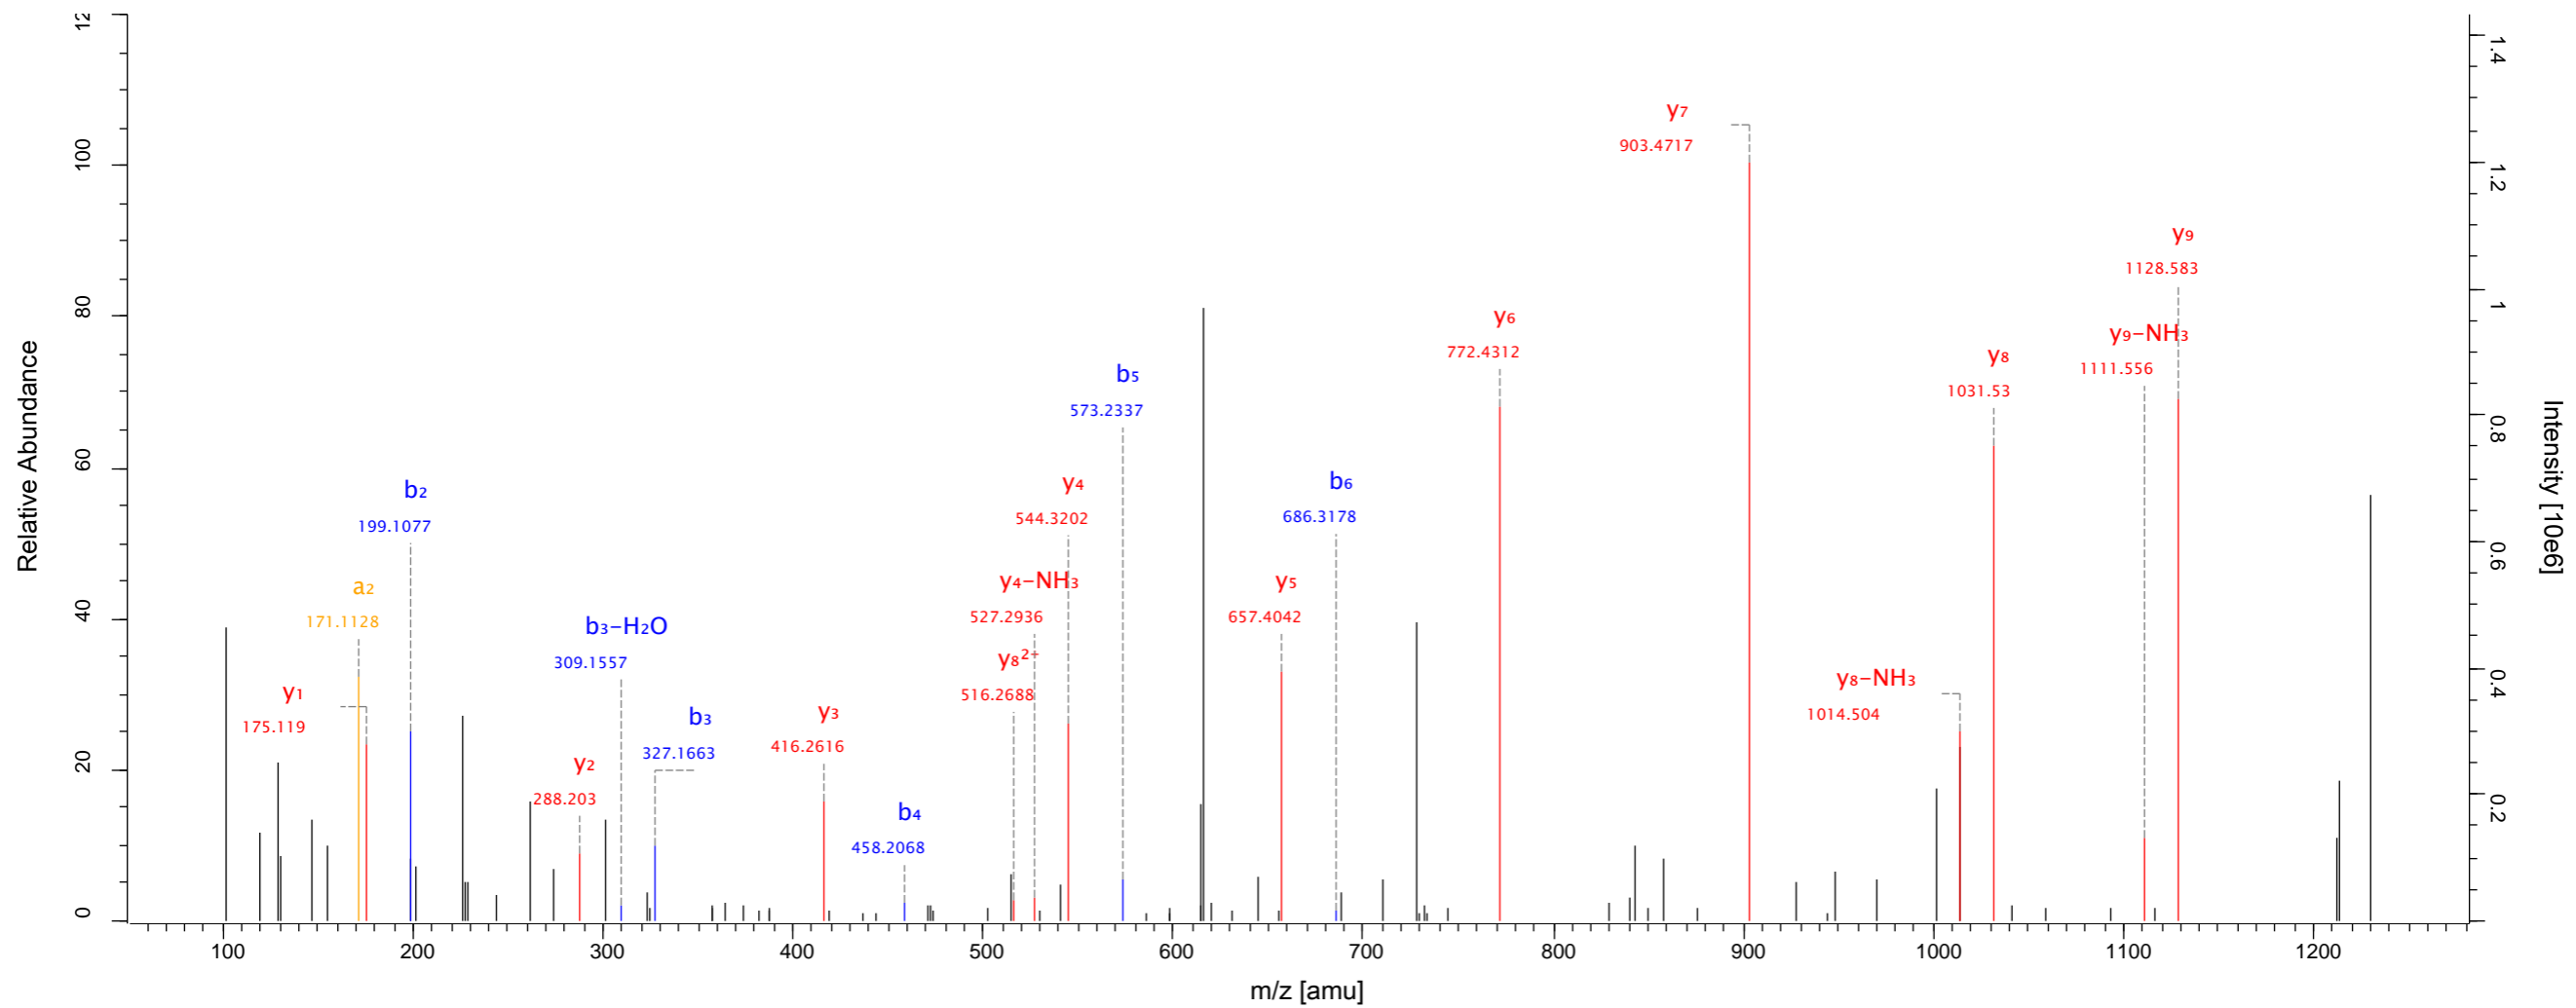

Raw file: 20111212\_EXQ5\_AnMi\_QC\_HCMVp1\_27\_111216192808  
Scan number: 30921  
Protein: ORFS365W + NC\_006273.2[225950,226606]+ <unknown description>  
Peptide score: 99.44  
Method: FTMS; HCD

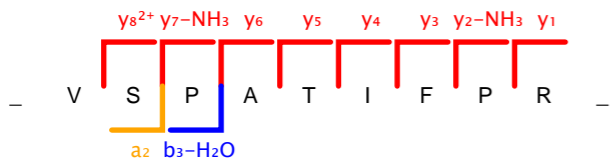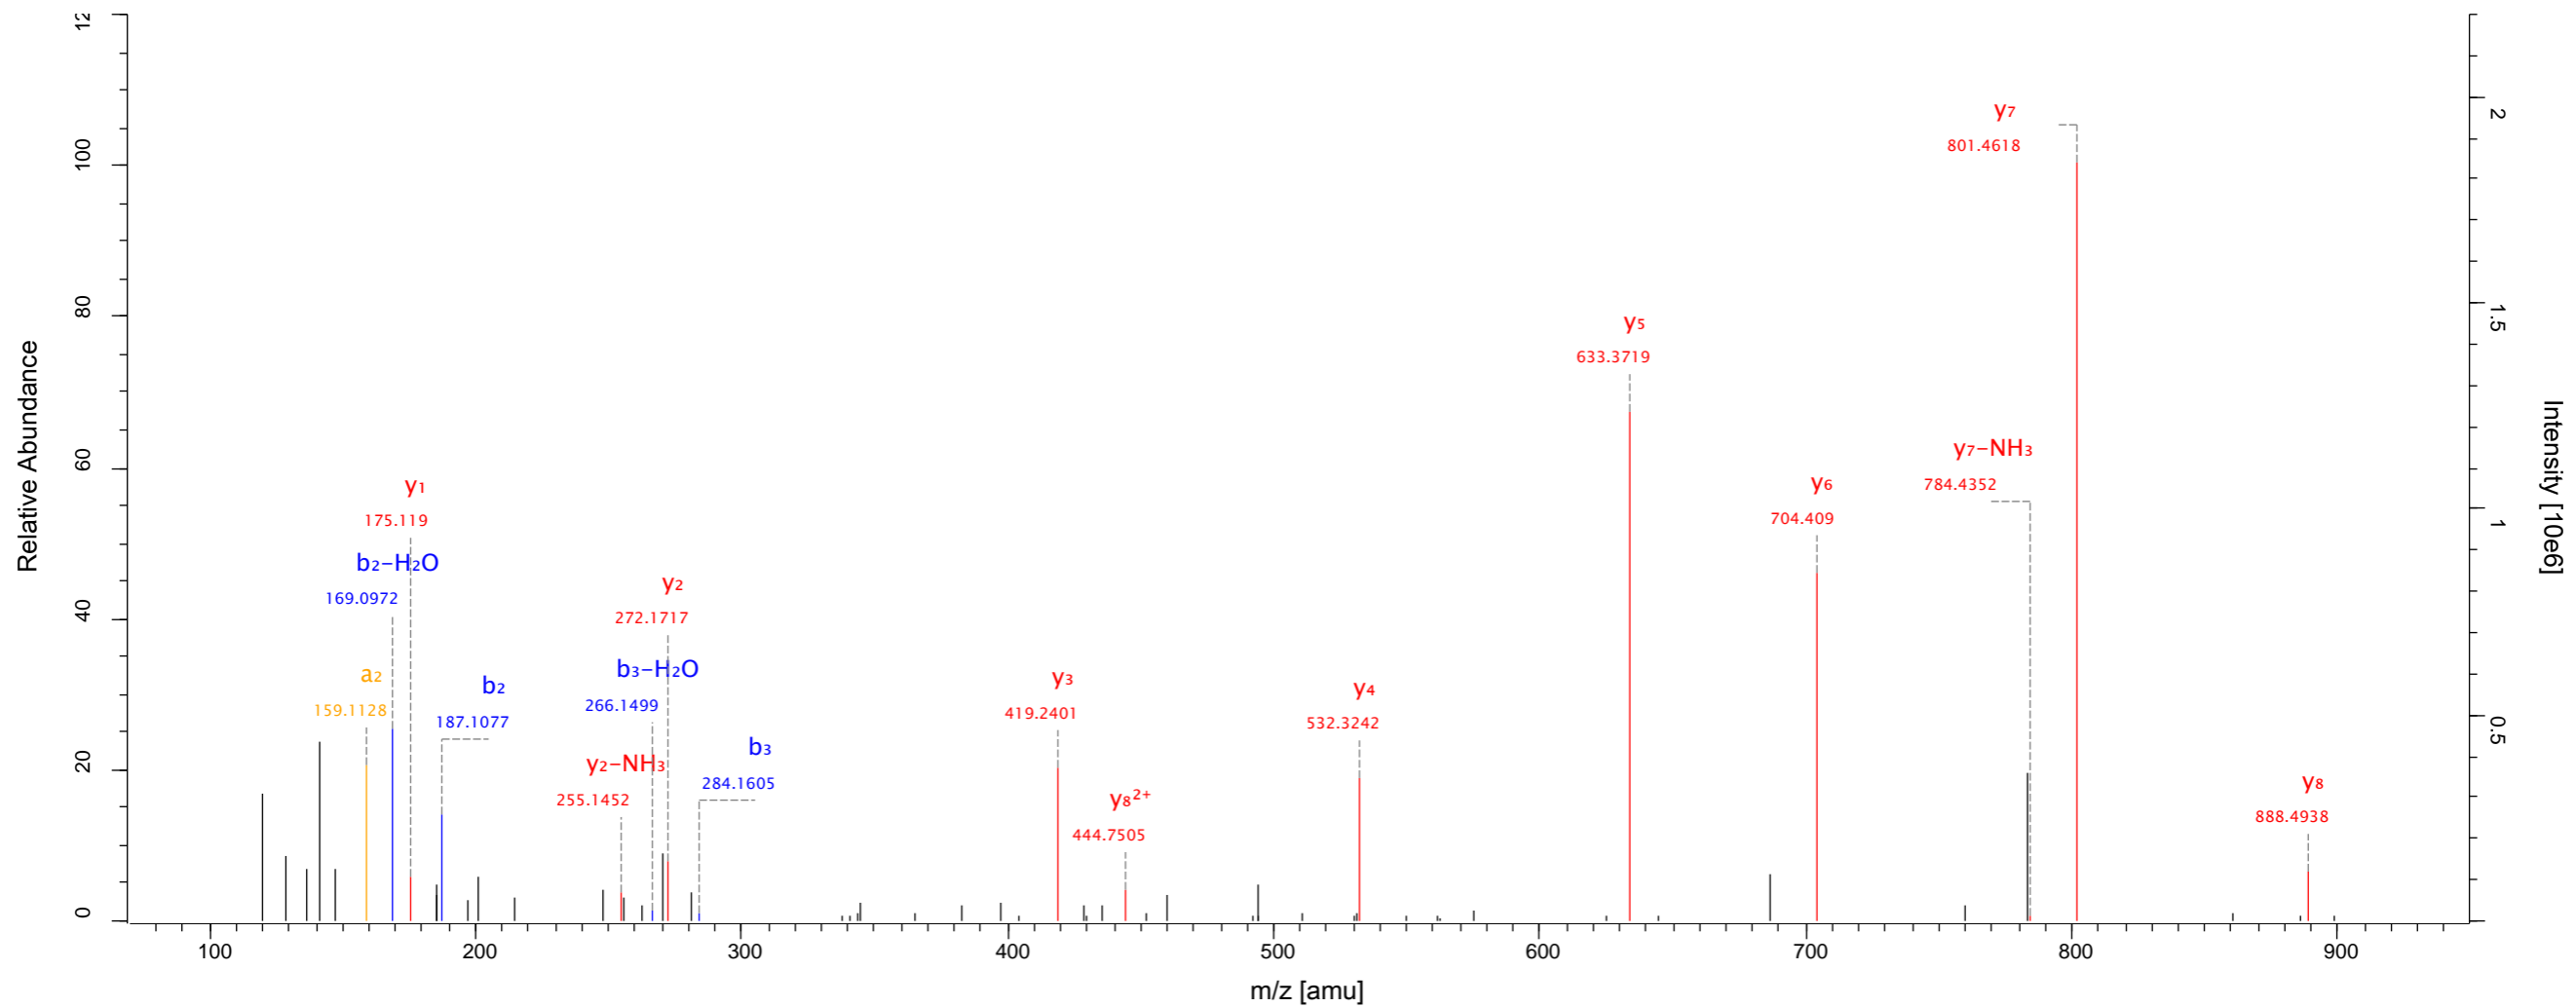

Raw file: 20111212\_EXQ5\_AnMi\_QC\_HCMVp1\_27\_111216192808  
Scan number: 31053  
Protein: ORFL251W + NC\_006273.2[161872,163748]+ <unknown description>  
Peptide score: 62.82  
Method: FTMS; HCD

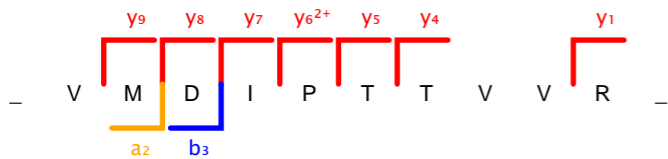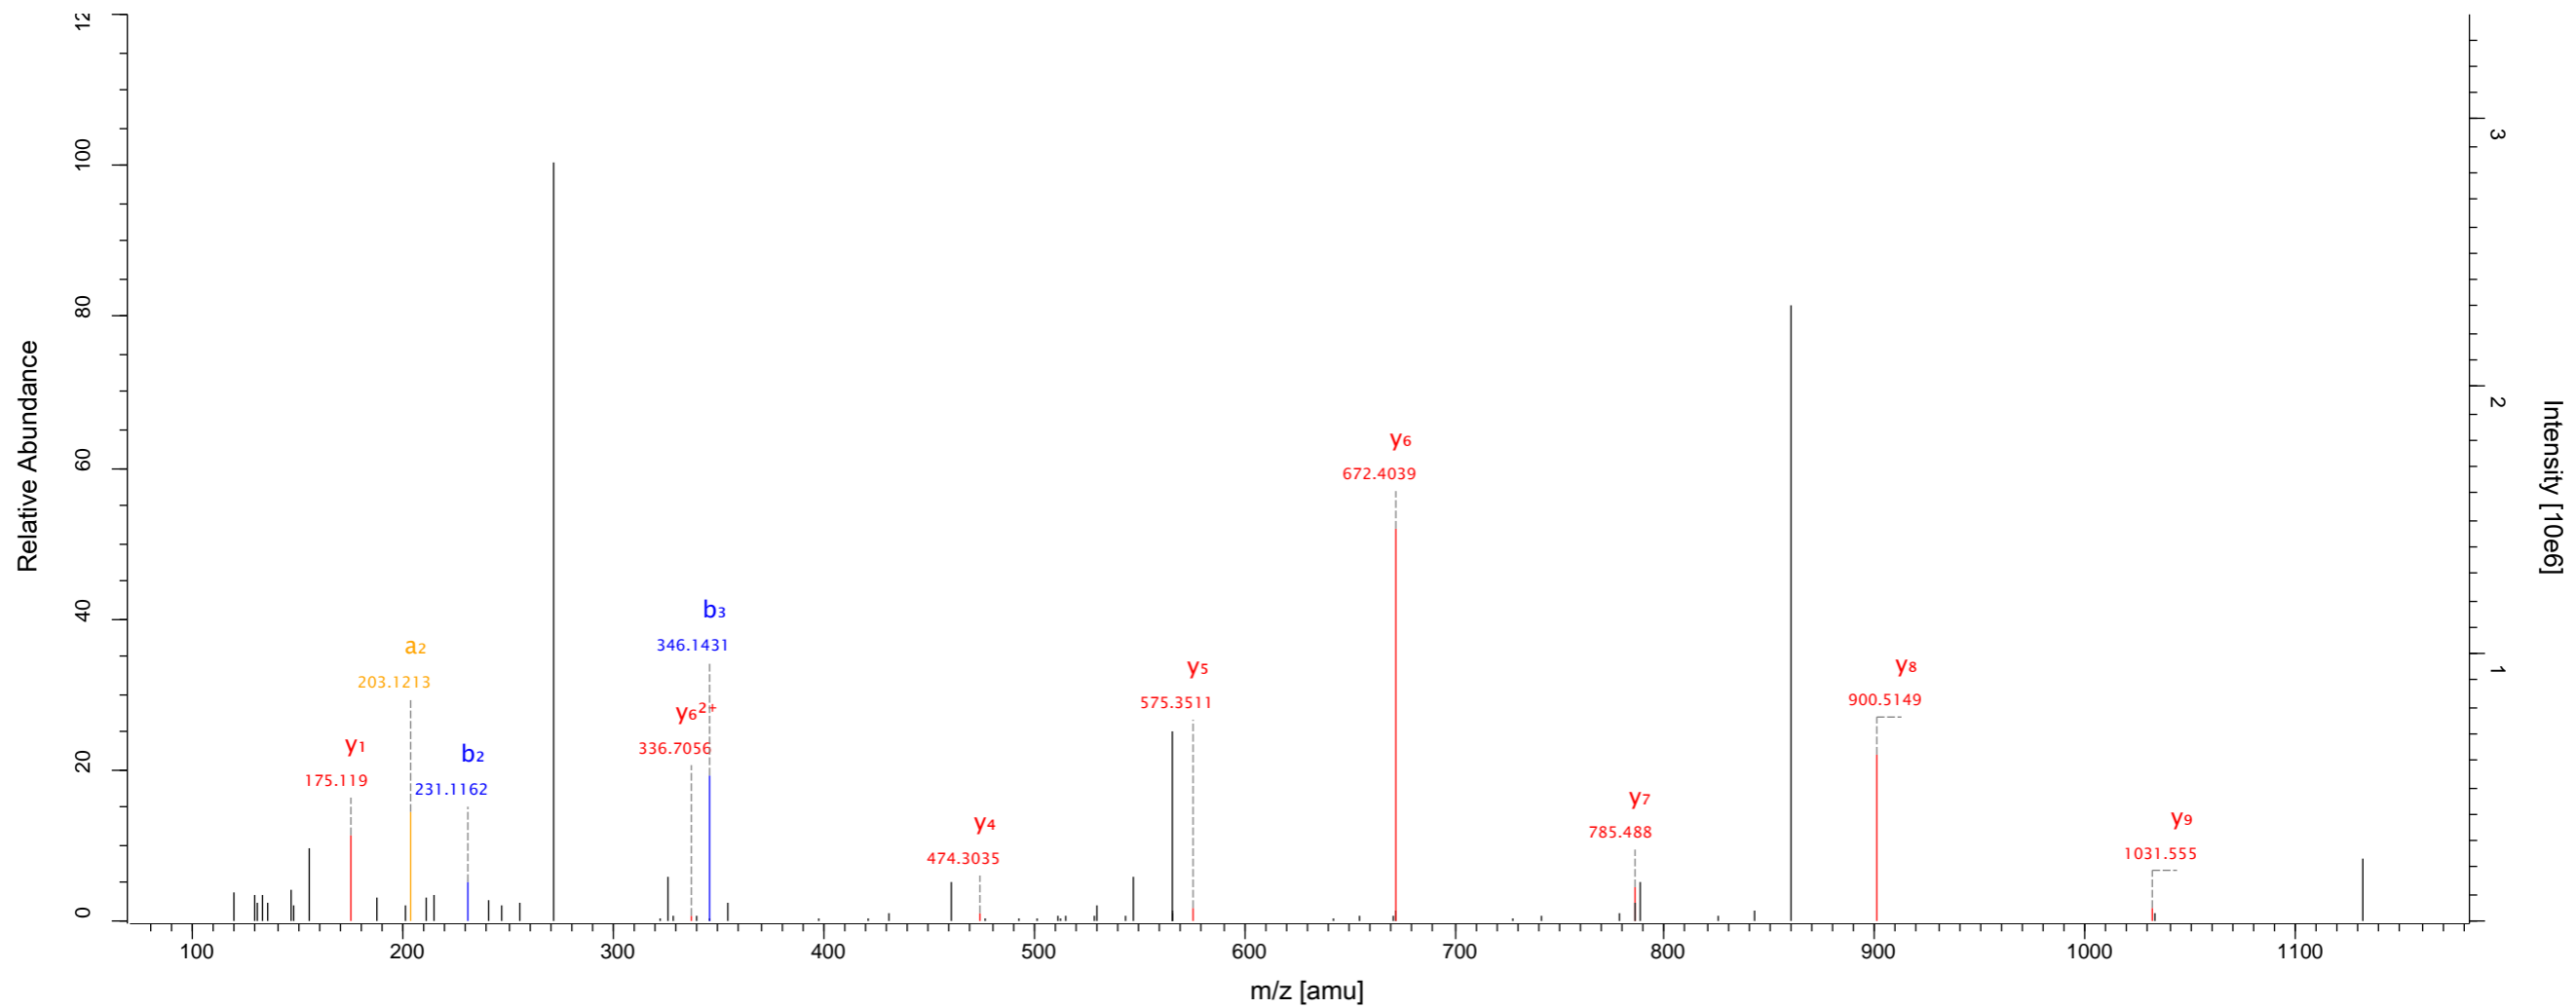

Raw file: 20111212\_EXQ5\_AnMi\_QC\_HCMVp1\_27\_111216192808  
Scan number: 33768  
Protein: ORFL118C - NC\_006273.2[61896,62396]- <unknown description>  
Peptide score: 107.21  
Method: FTMS; HCD

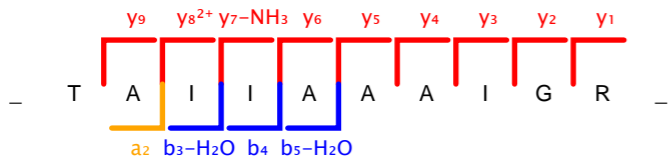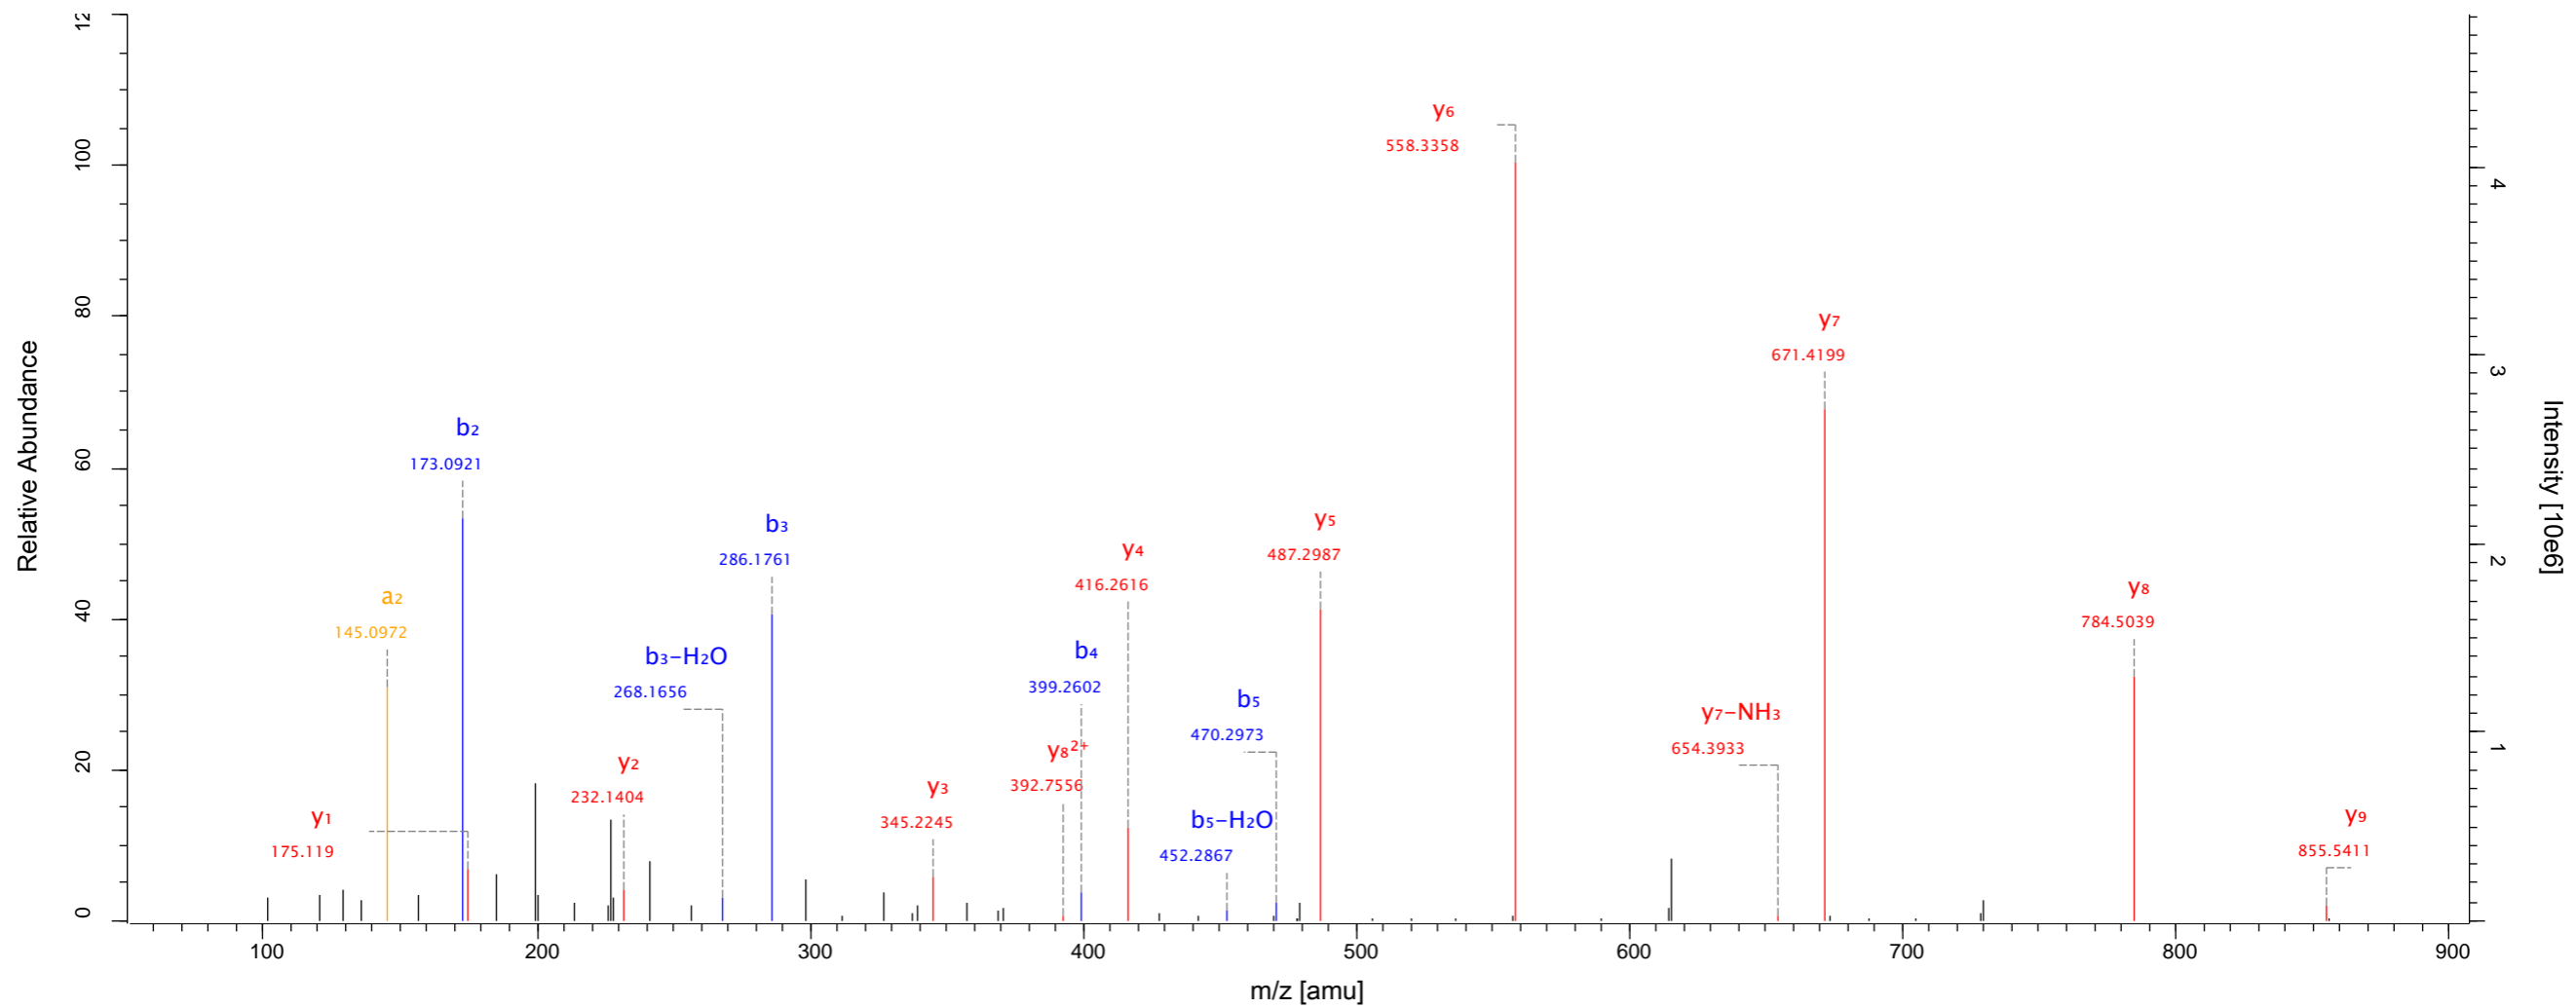

Raw file: 20111212\_EXQ5\_AnMi\_QC\_HCMVp1\_27\_111216192808  
 Scan number: 43262  
 Protein: ORFL130W + NC\_006273.2[72313,72744]+ <unknown description>  
 Peptide score: 132.13  
 Method: FTMS; HCD

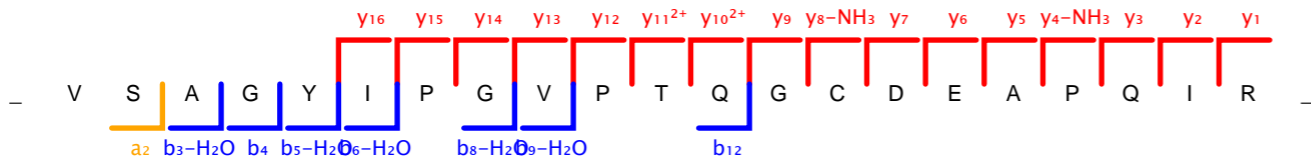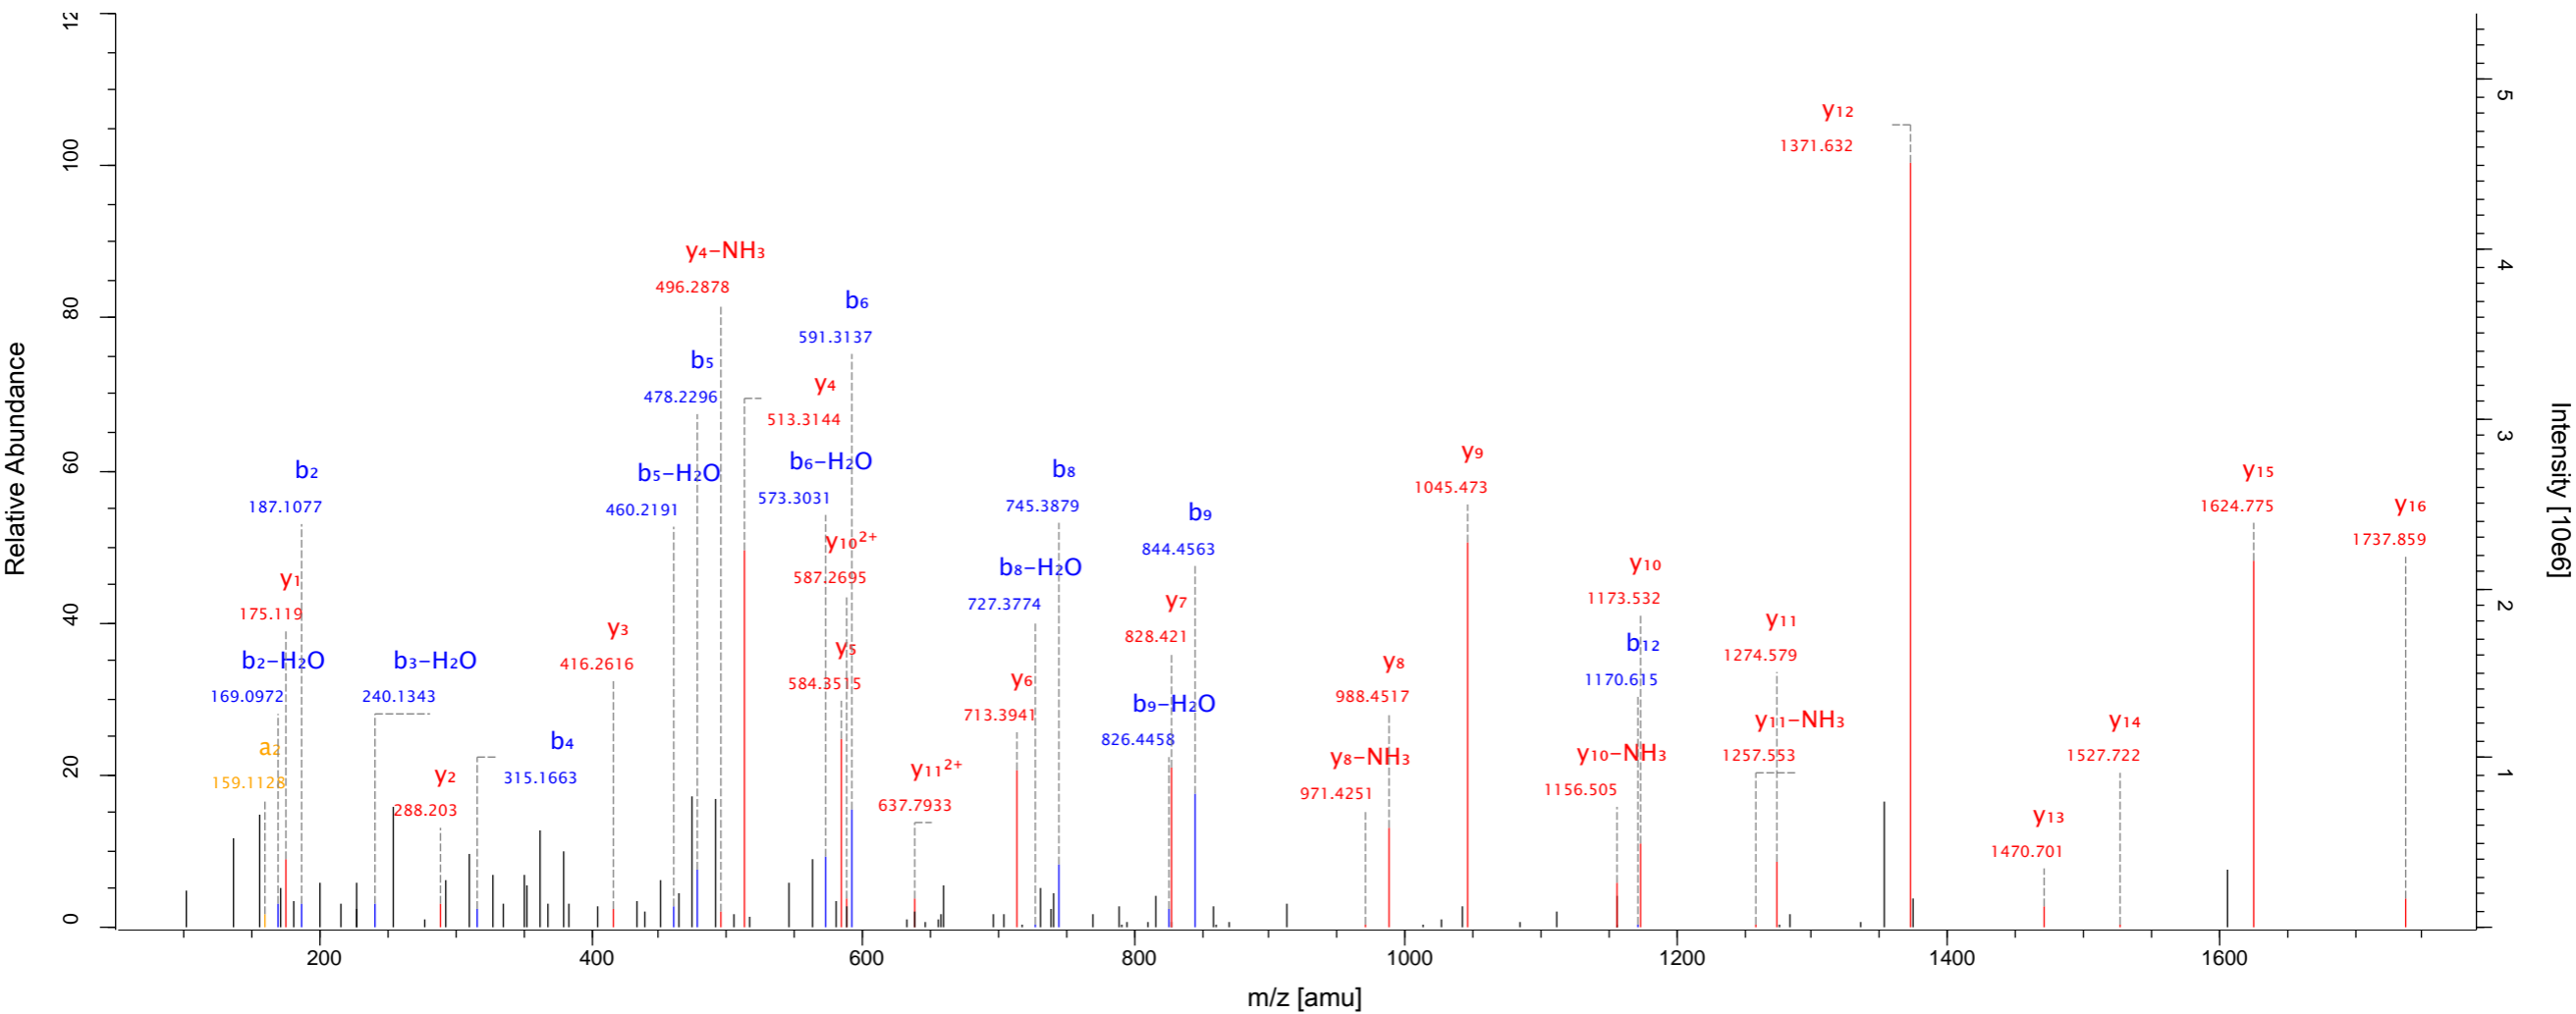



Raw file: 20111212\_EXQ5\_AnMi\_QC\_HCMVp1\_27\_111216192808  
 Scan number: 43454  
 Protein: ORFL130W + NC\_006273.2[72313,72744]+ <unknown description>  
 Peptide score: 235.9  
 Method: FTMS; HCD

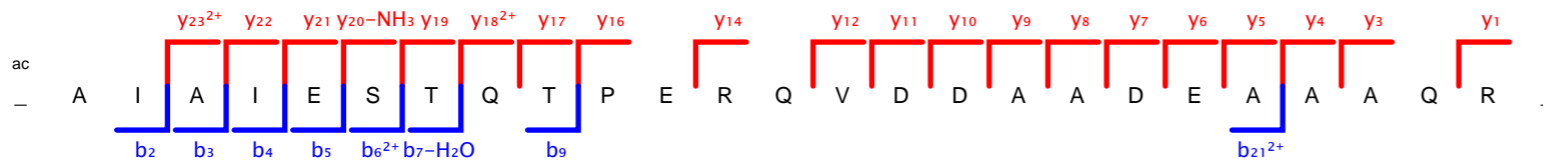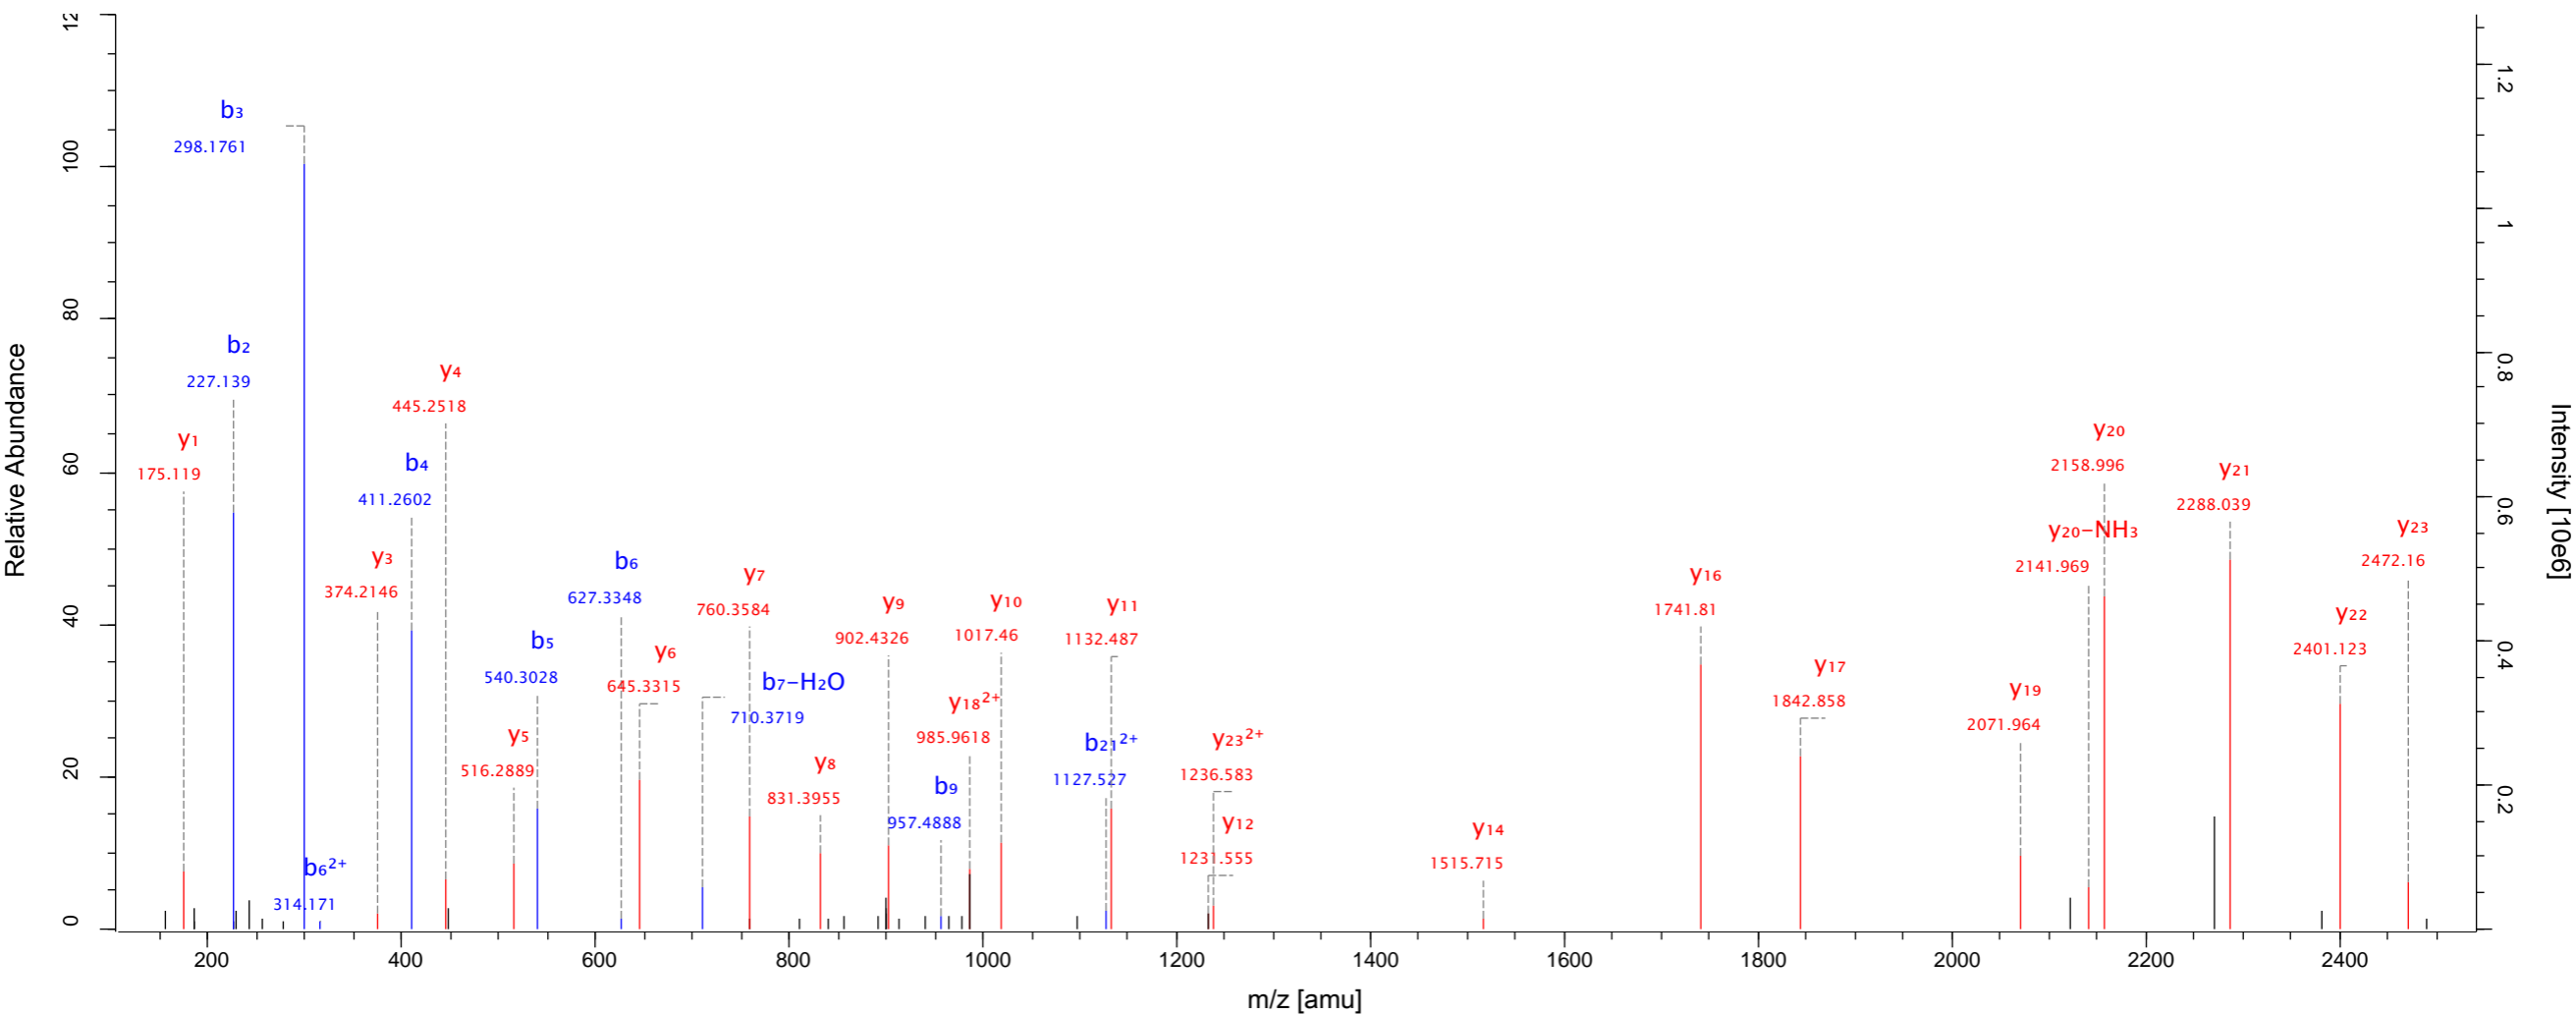

Raw file: 20111212\_EXQ5\_AnMi\_QC\_HCMVp1\_27\_111216192808  
Scan number: 43848  
Protein: ORFL86W + NC\_006273.2[38059,38538]+ <unknown description>  
Peptide score: 137.19  
Method: FTMS; HCD

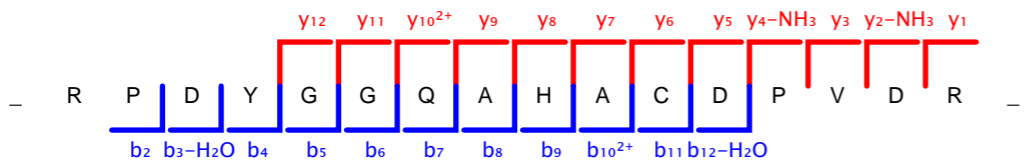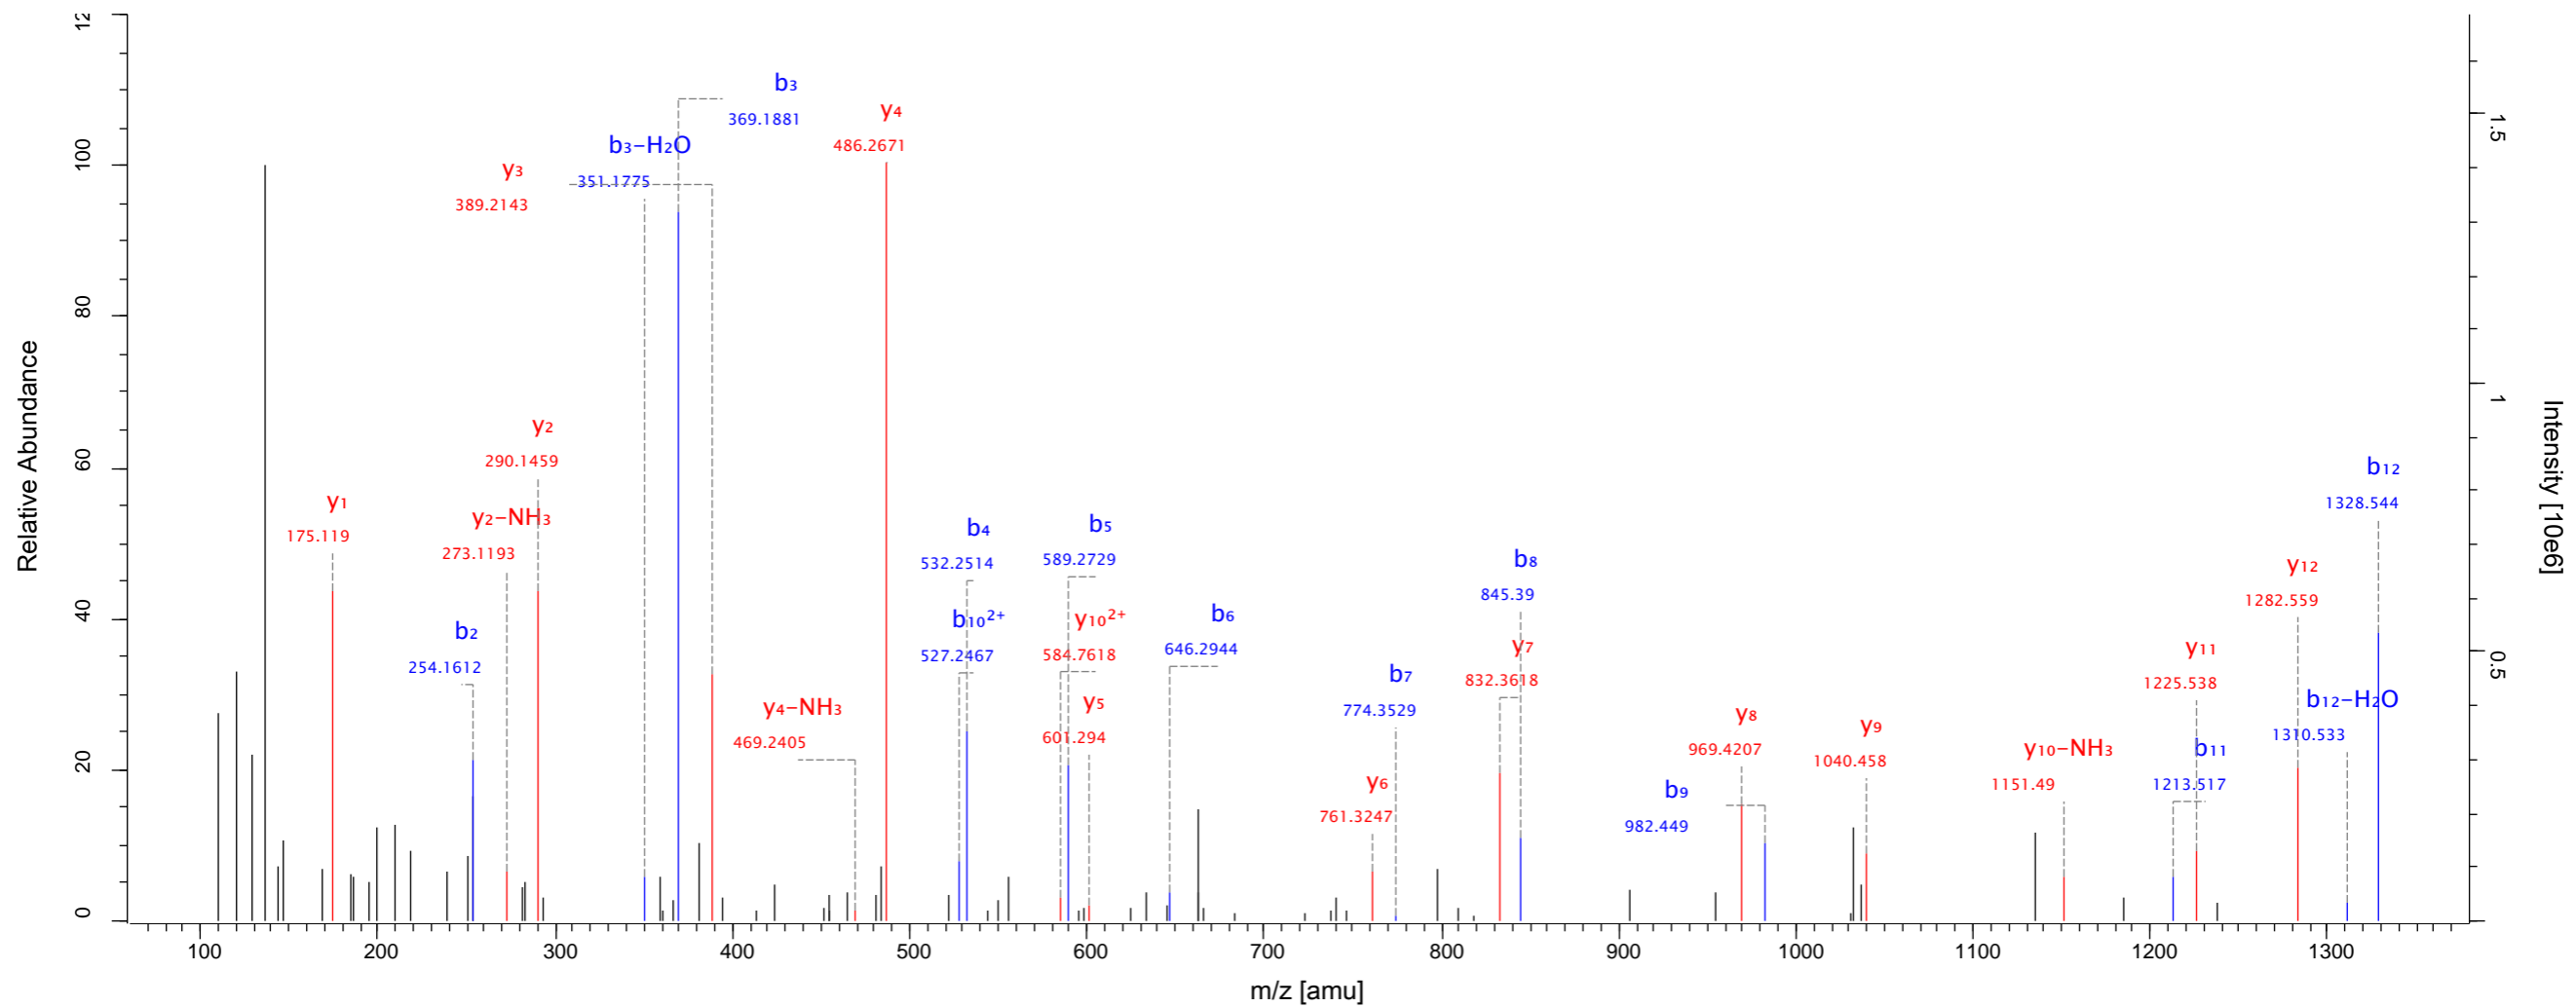

Raw file: 20111212\_EXQ5\_AnMi\_QC\_HCMVp1\_27\_111216192808  
 Scan number: 6782  
 Protein: ORFL114W + NC\_006273.2[60151,60708]+ <unknown description>  
 Peptide score: 101.64  
 Method: FTMS; HCD

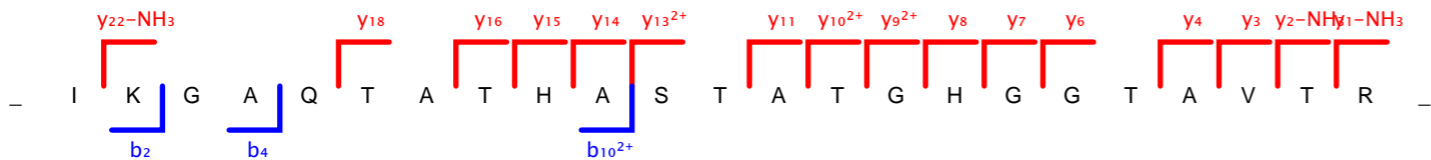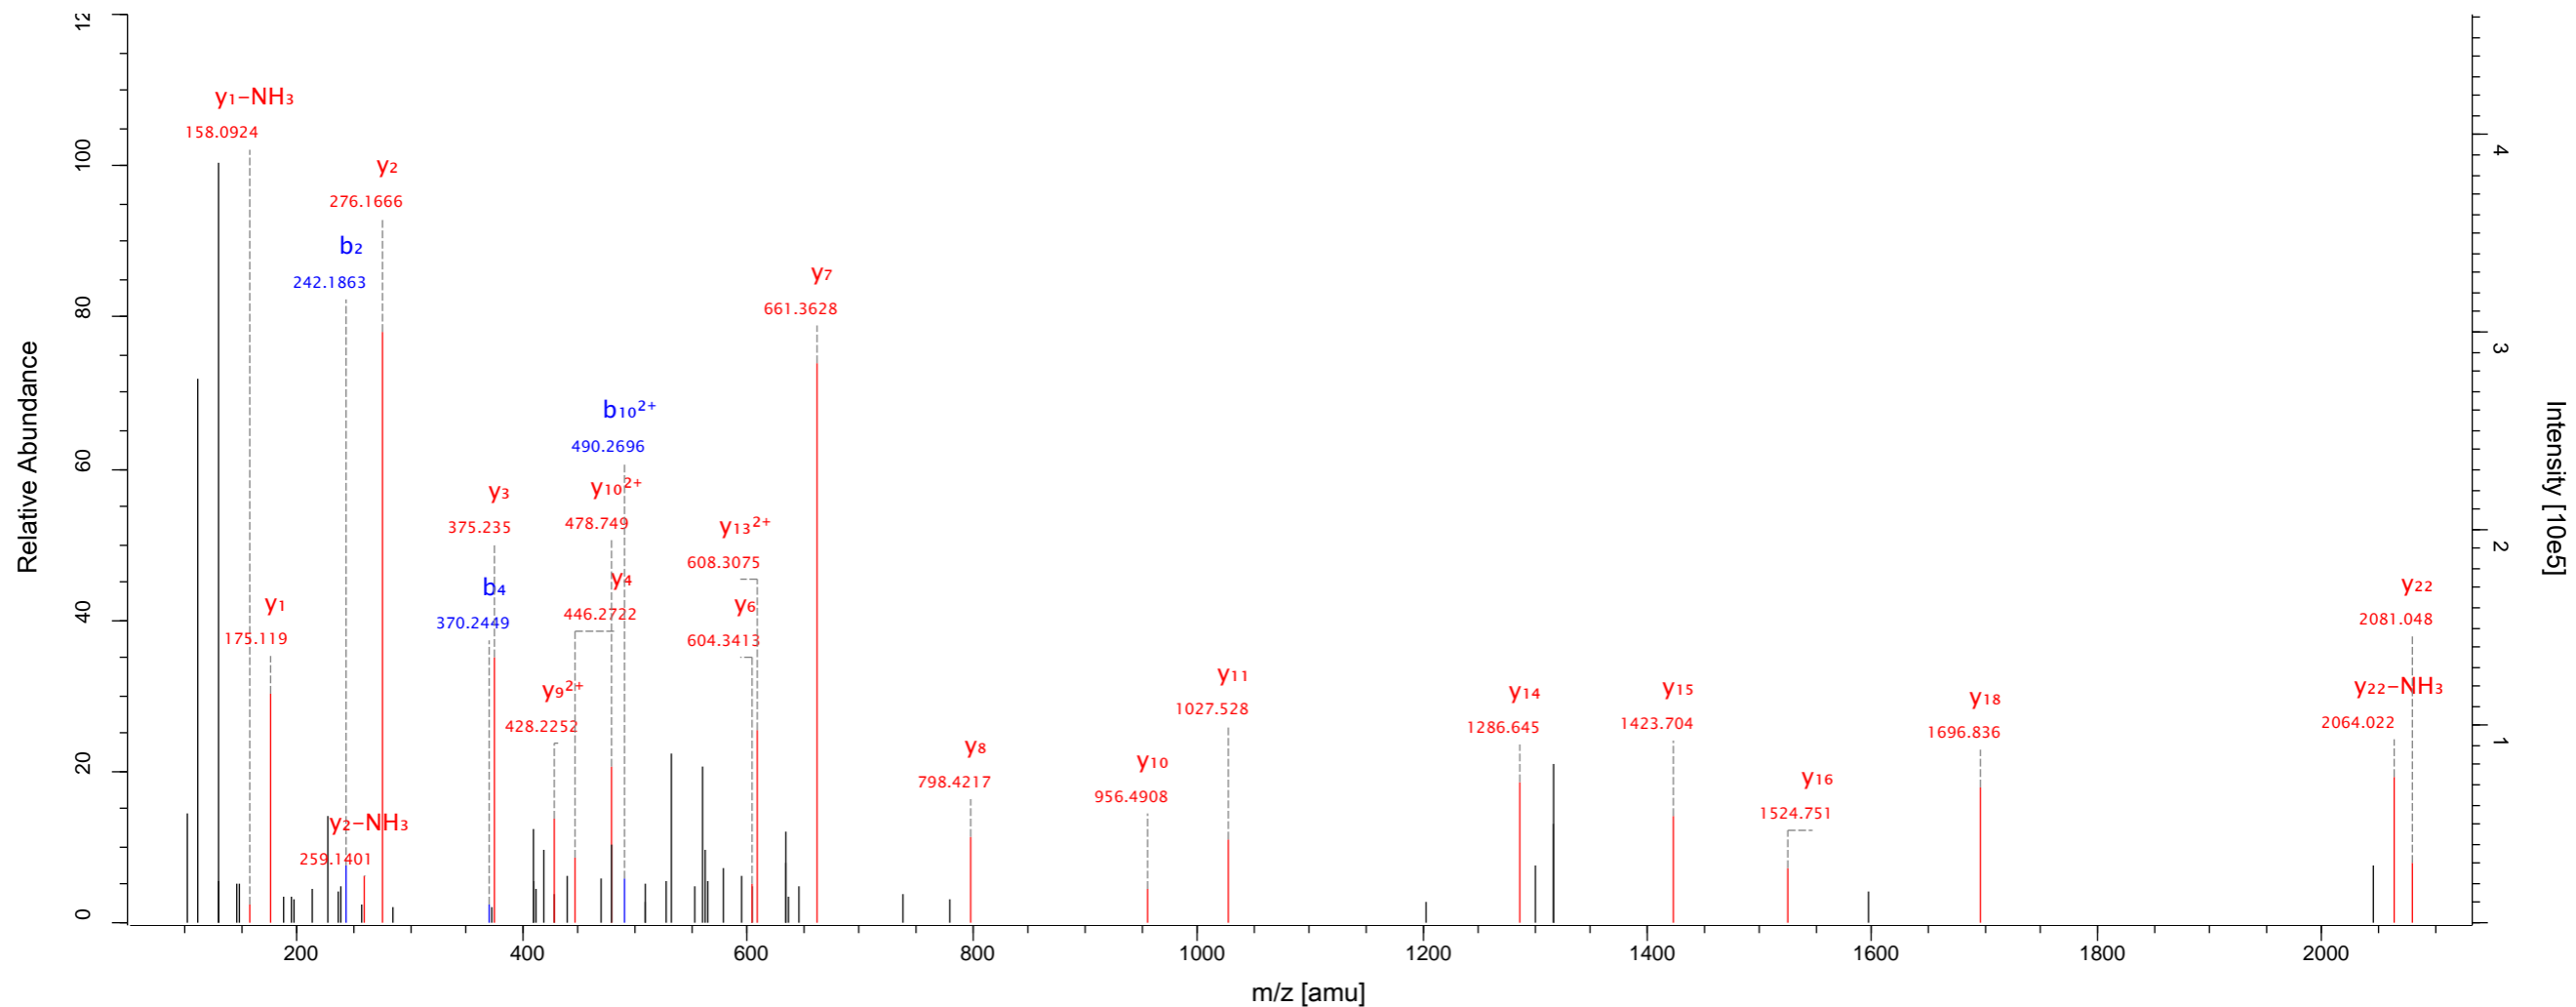

Raw file: 20111212\_EXQ5\_AnMi\_QC\_HCMVp11\_27\_111216192808  
Scan number: 7426  
Protein: ORFL86W + NC\_006273.2[38059,38538]+ <unknown description>  
Peptide score: 83.69  
Method: FTMS; HCD

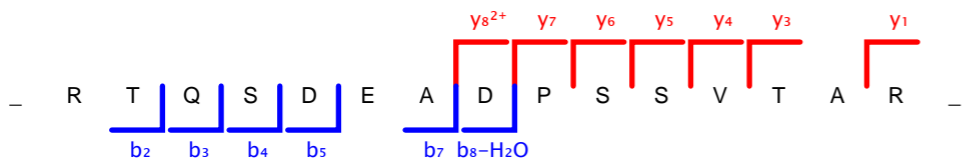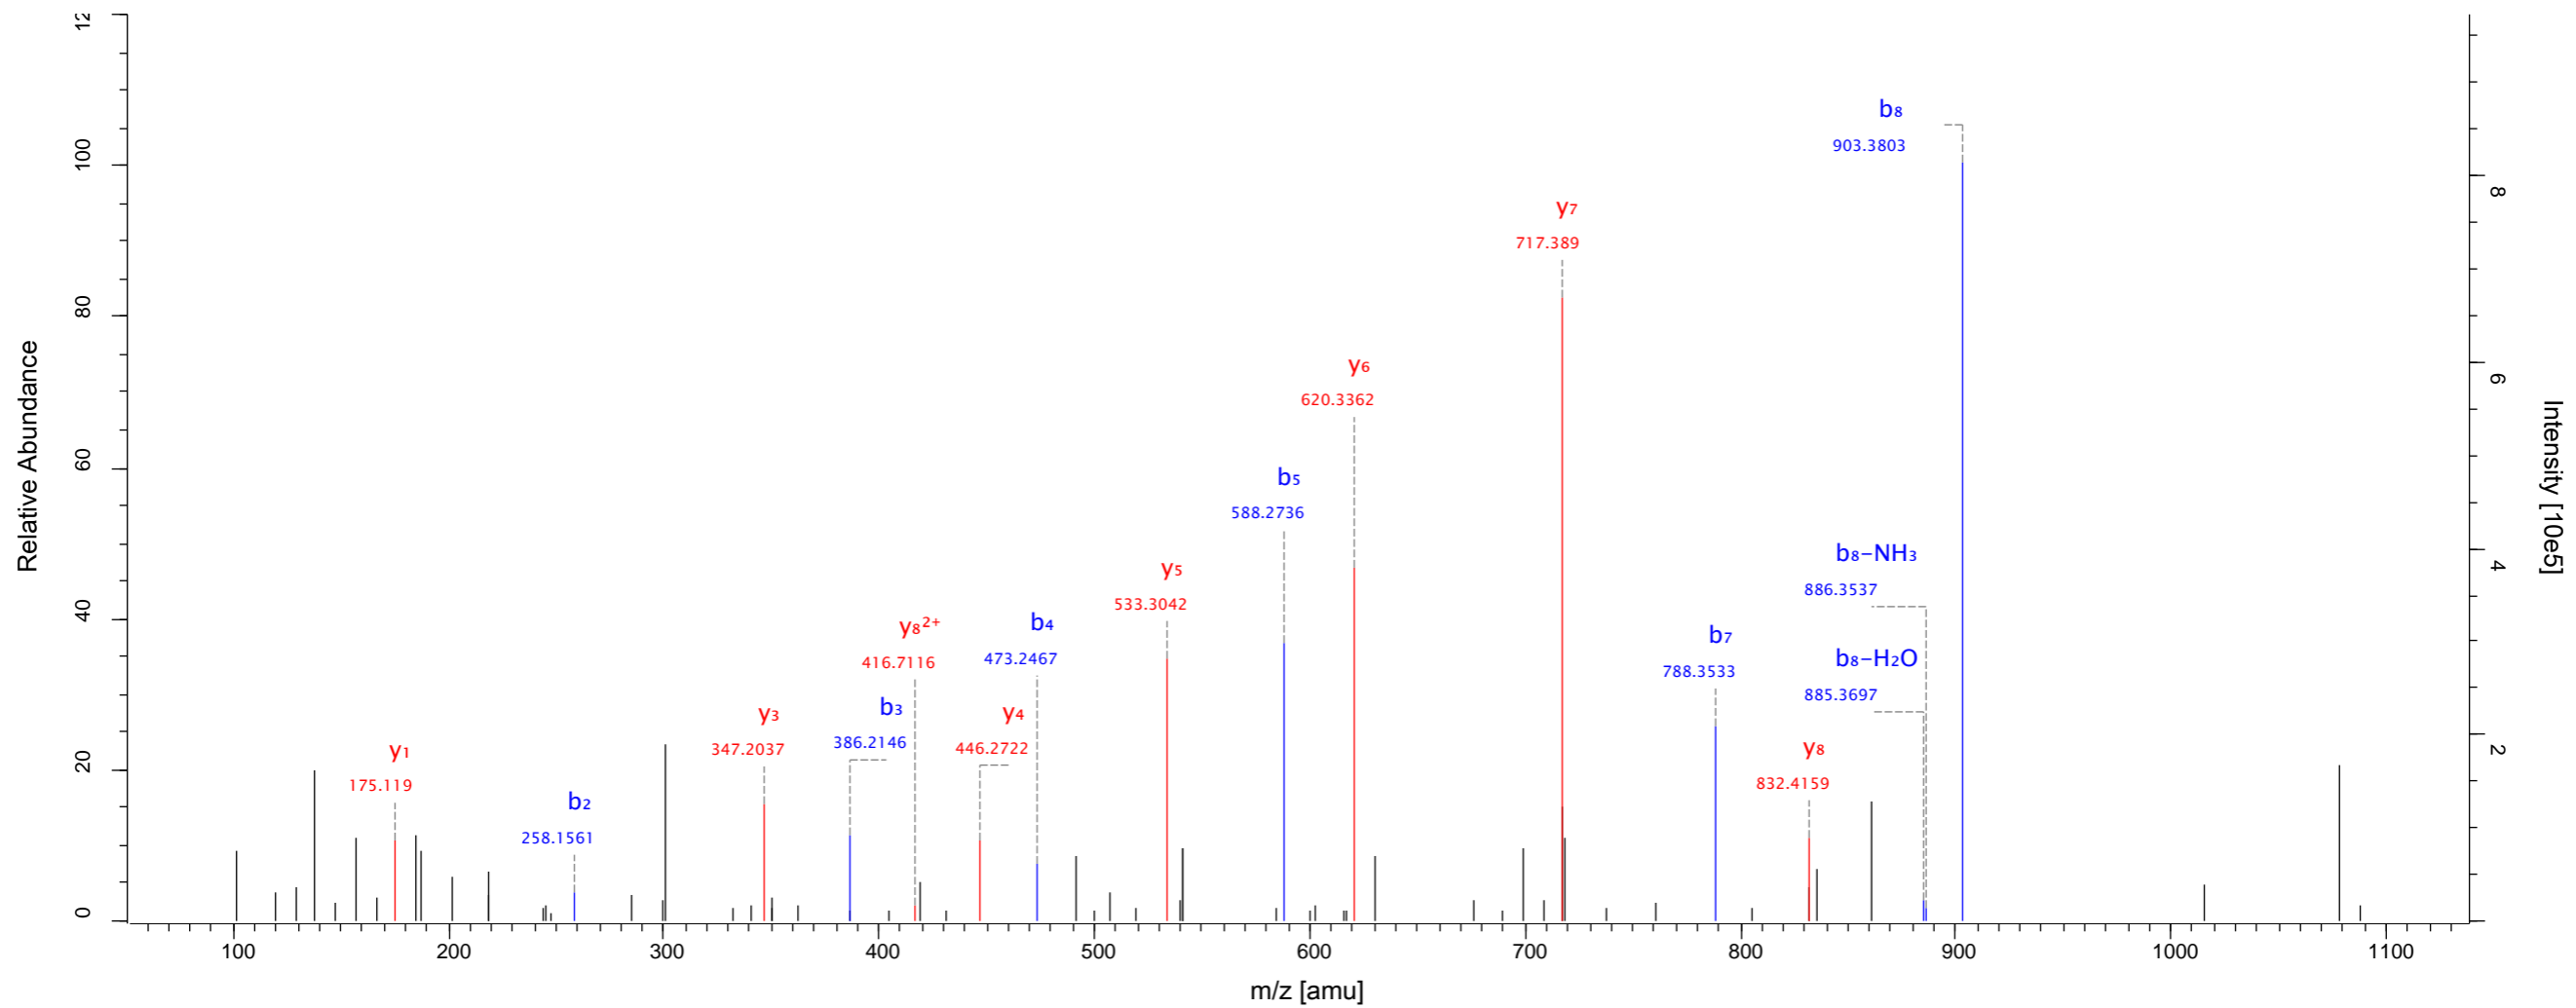

Raw file: 20111212\_EXQ5\_AnMi\_QC\_HCMVp1\_27\_111216192808  
 Scan number: 8745  
 Protein: ORFL130W + NC\_006273.2[72313,72744]+ <unknown description>  
 Peptide score: 149.23  
 Method: FTMS; HCD

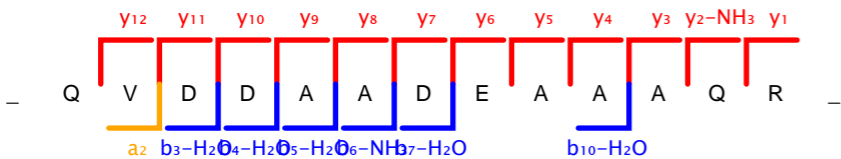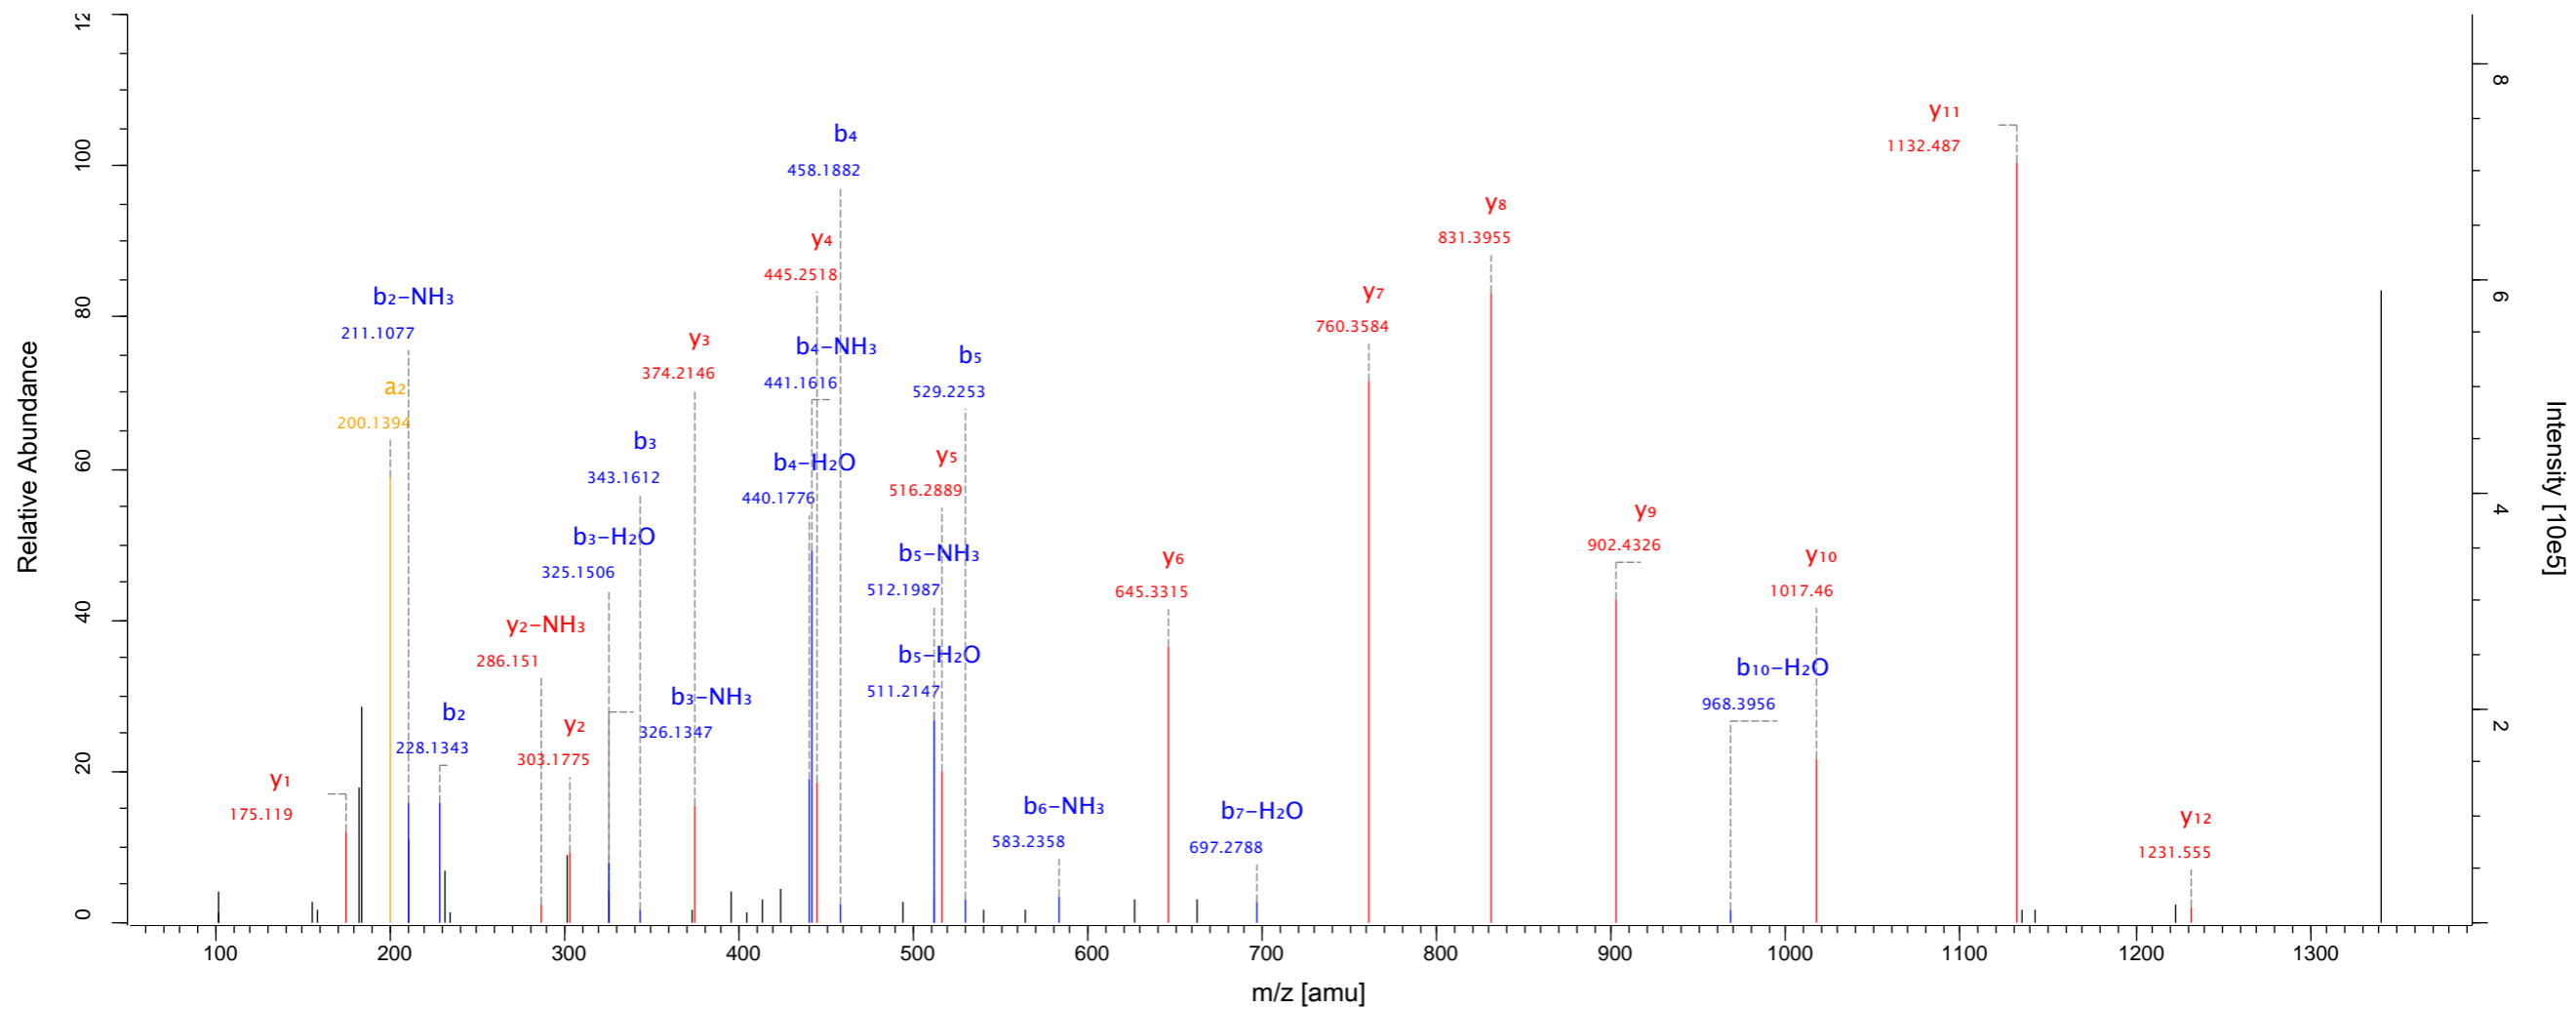

Raw file: 20111212\_EXQ5\_AnMi\_QC\_HCMVp11\_27

Scan number: 10080

Protein: ORFL321W + NC\_006273.2[191968,194126]+ <unknown description>; ORFL321W.iORF1 + NC\_006273.2[191968,194126]+ <unknown description>; ORFL321W.iORF4 + NC\_006273.2[193200,194126]+ <unknown description>

Peptide score: 118.26

Method: FTMS; HCD

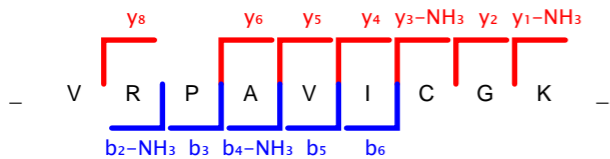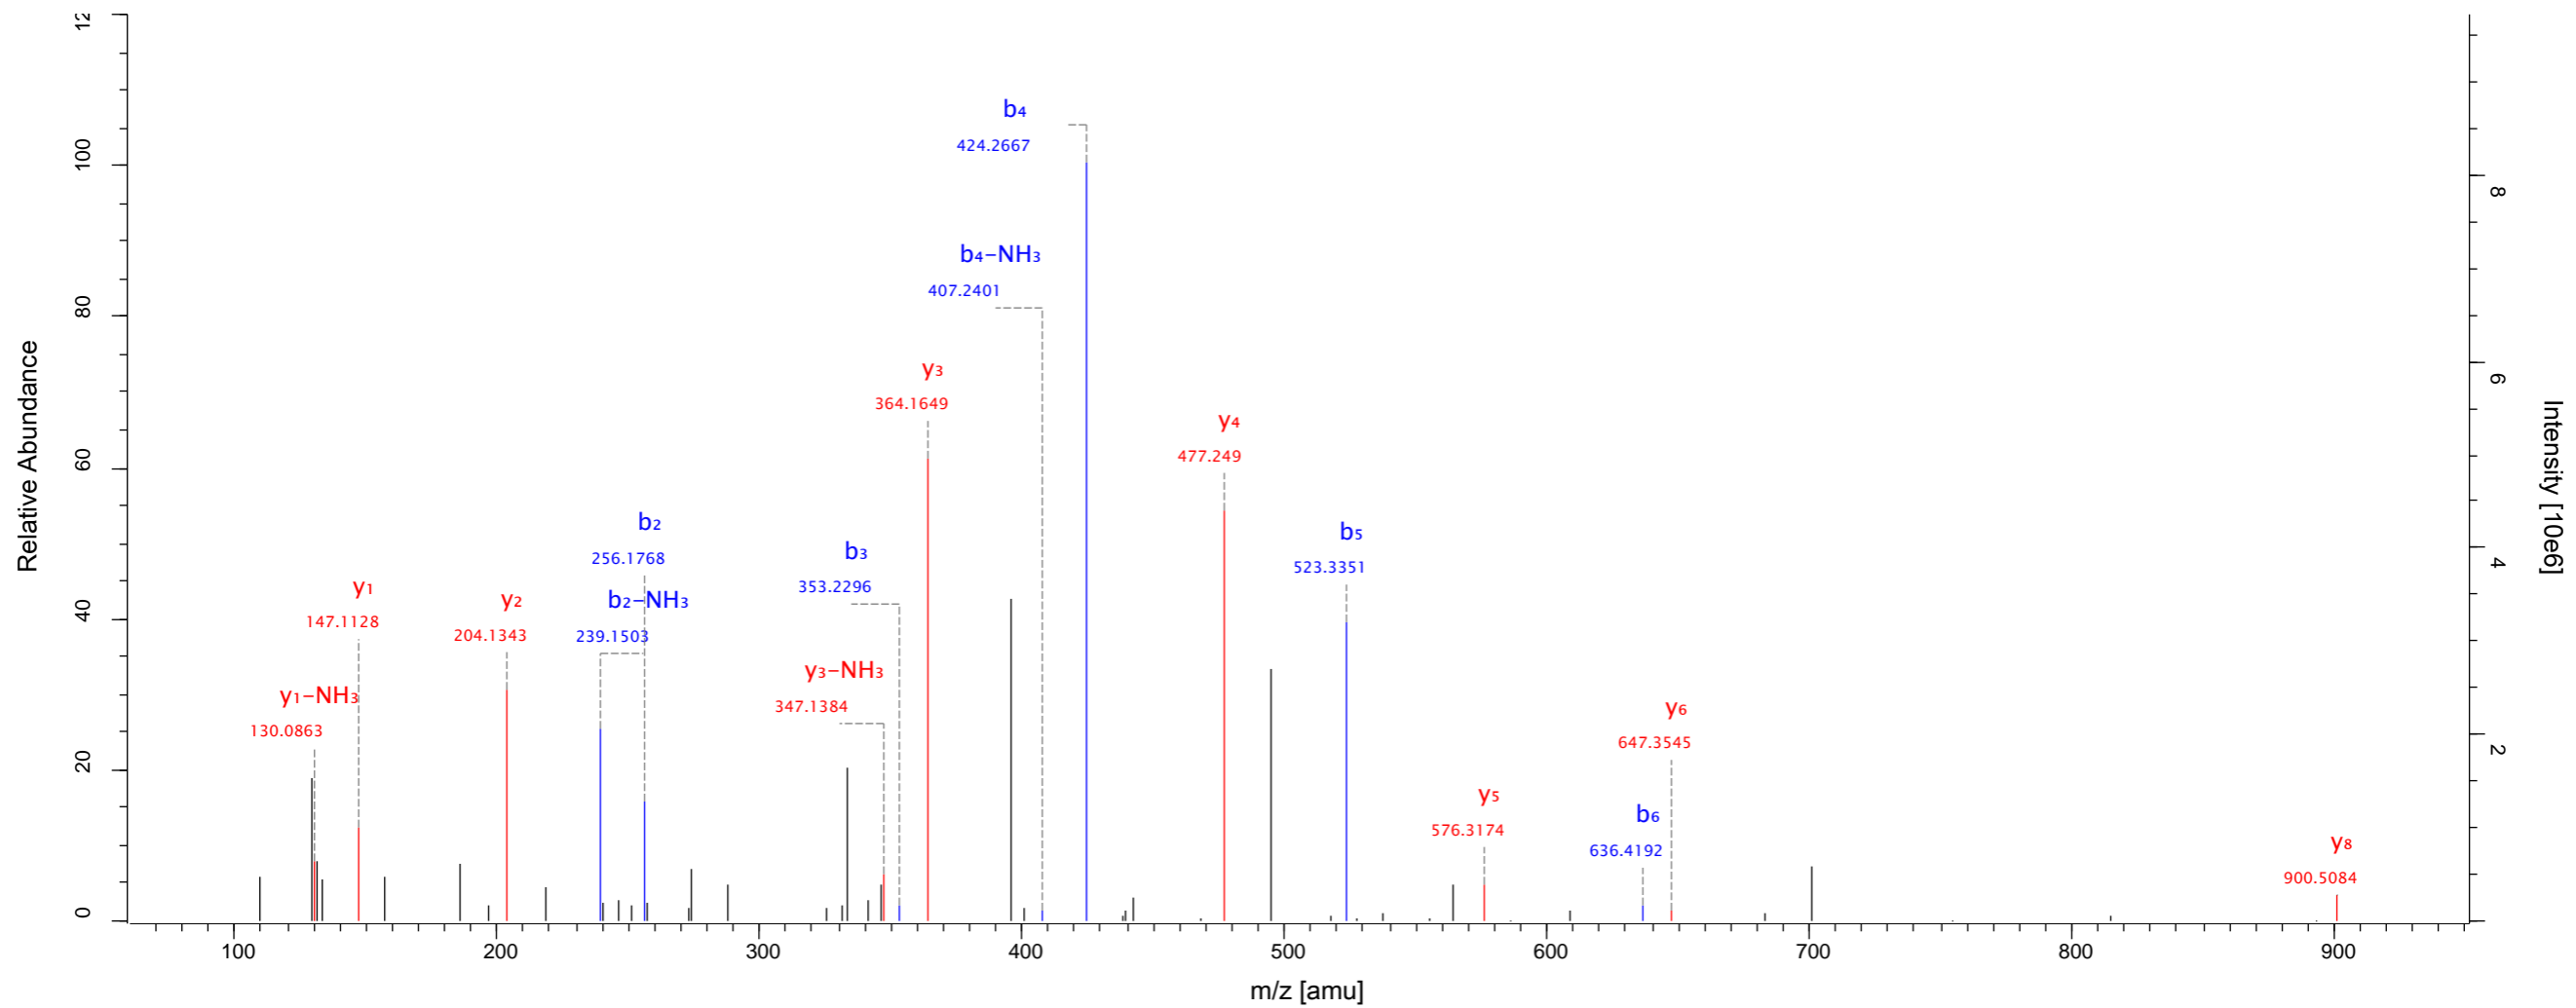

Raw file: 20111212\_EXQ5\_AnMi\_QC\_HCMVp1\_27  
 Scan number: 11445  
 Protein: ORFL130W + NC\_006273.2[72313,72744]+ <unknown description>  
 Peptide score: 209.6  
 Method: FTMS; HCD

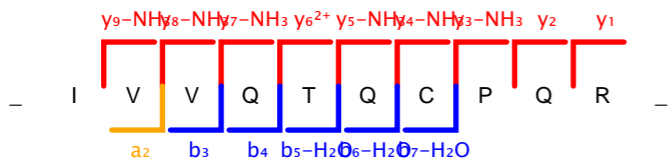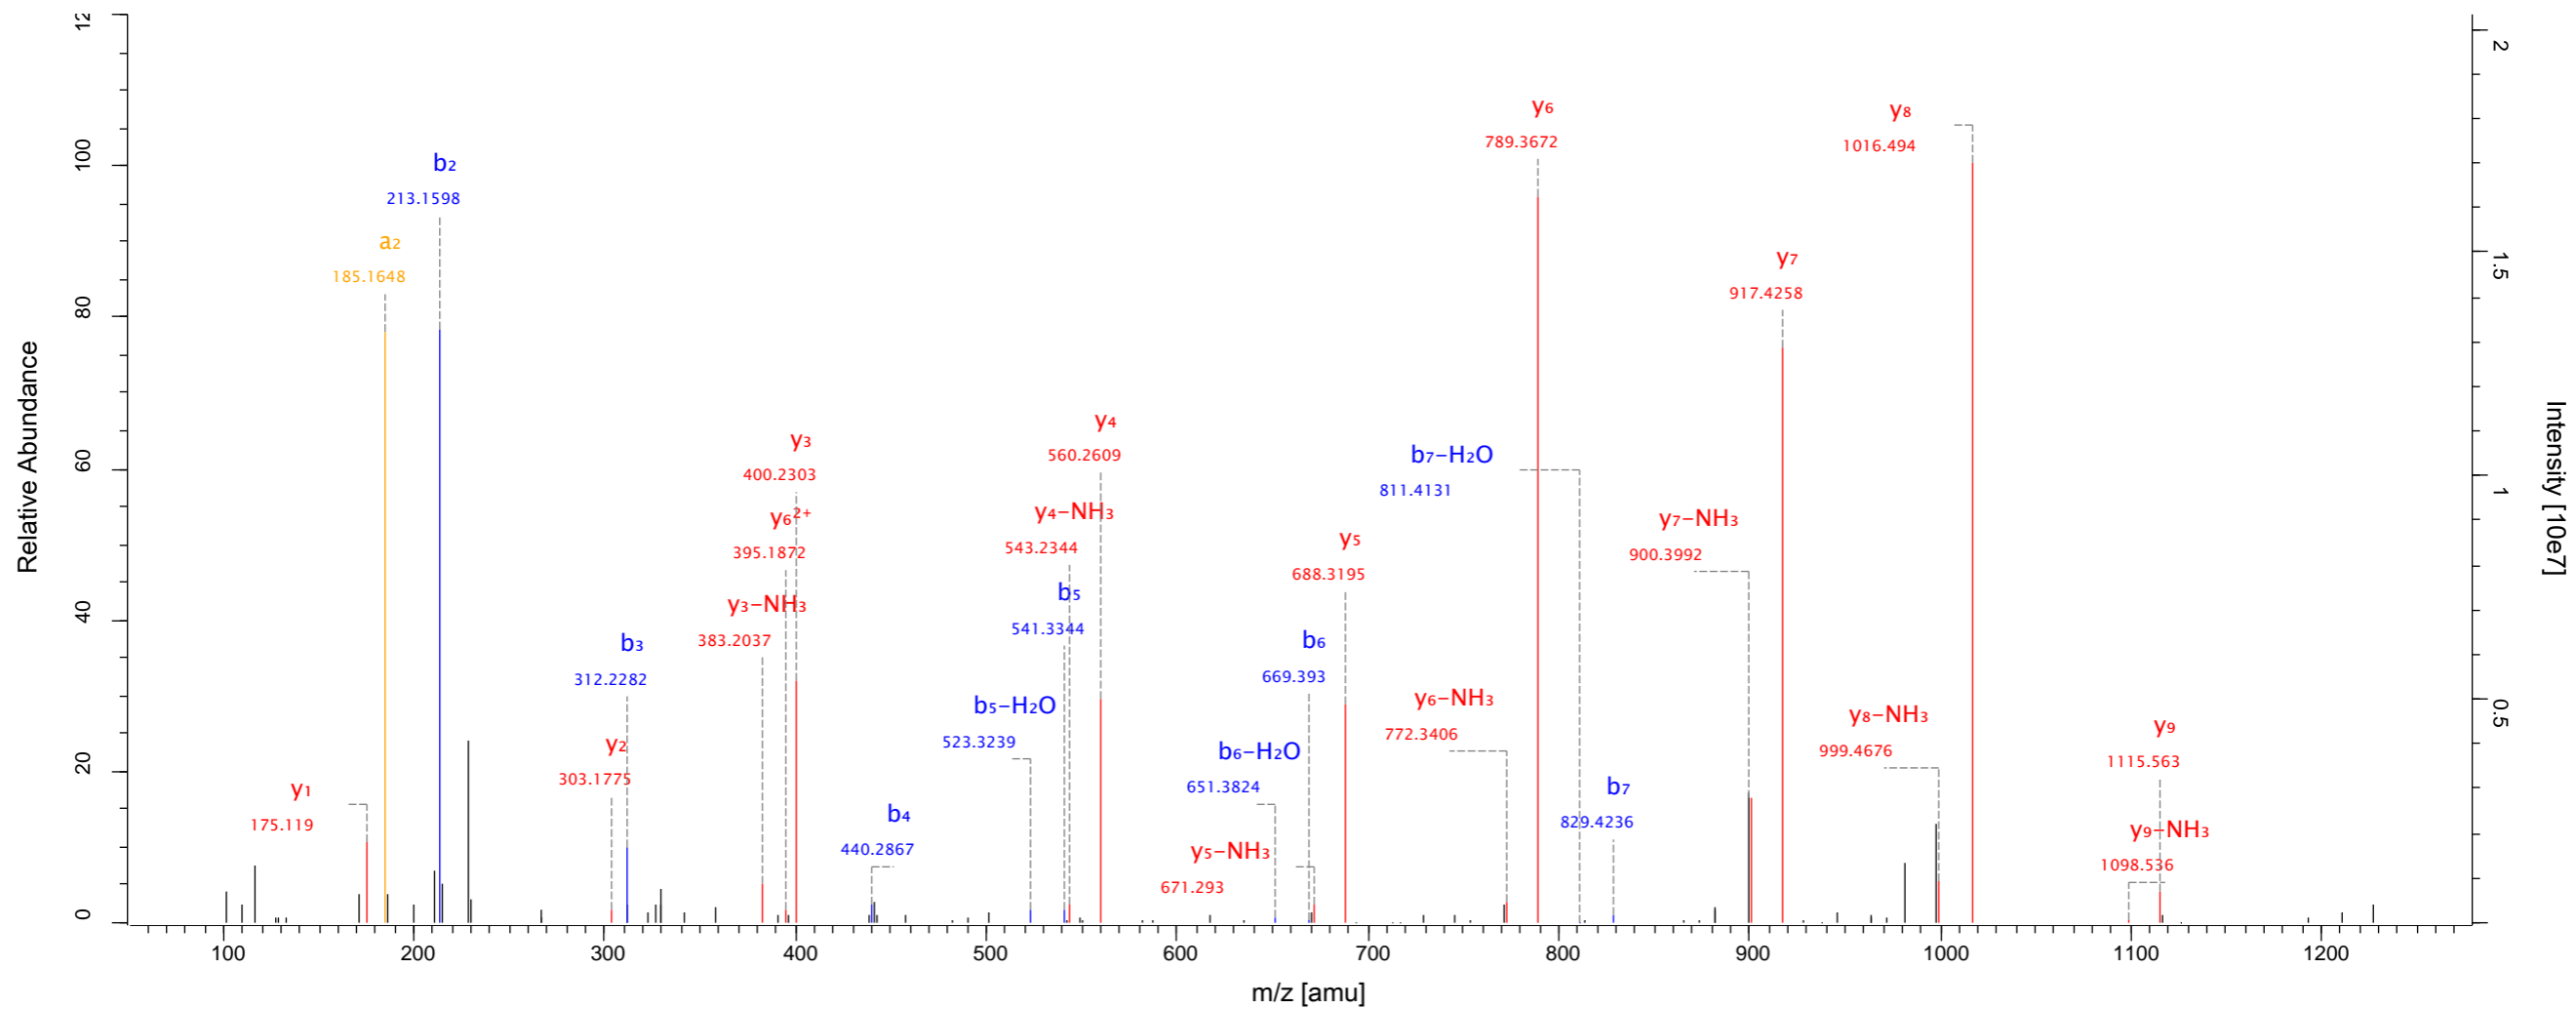

Raw file: 20111212\_EXQ5\_AnMi\_QC\_HCMVp1\_27  
 Scan number: 11506  
 Protein: ORFL86W + NC\_006273.2[38059,38538]+ <unknown description>  
 Peptide score: 196.44  
 Method: FTMS; HCD

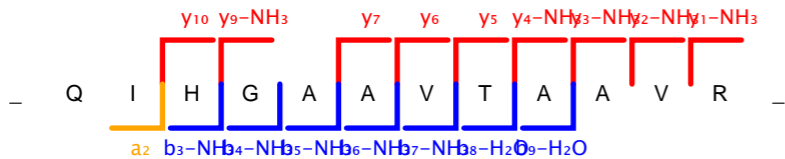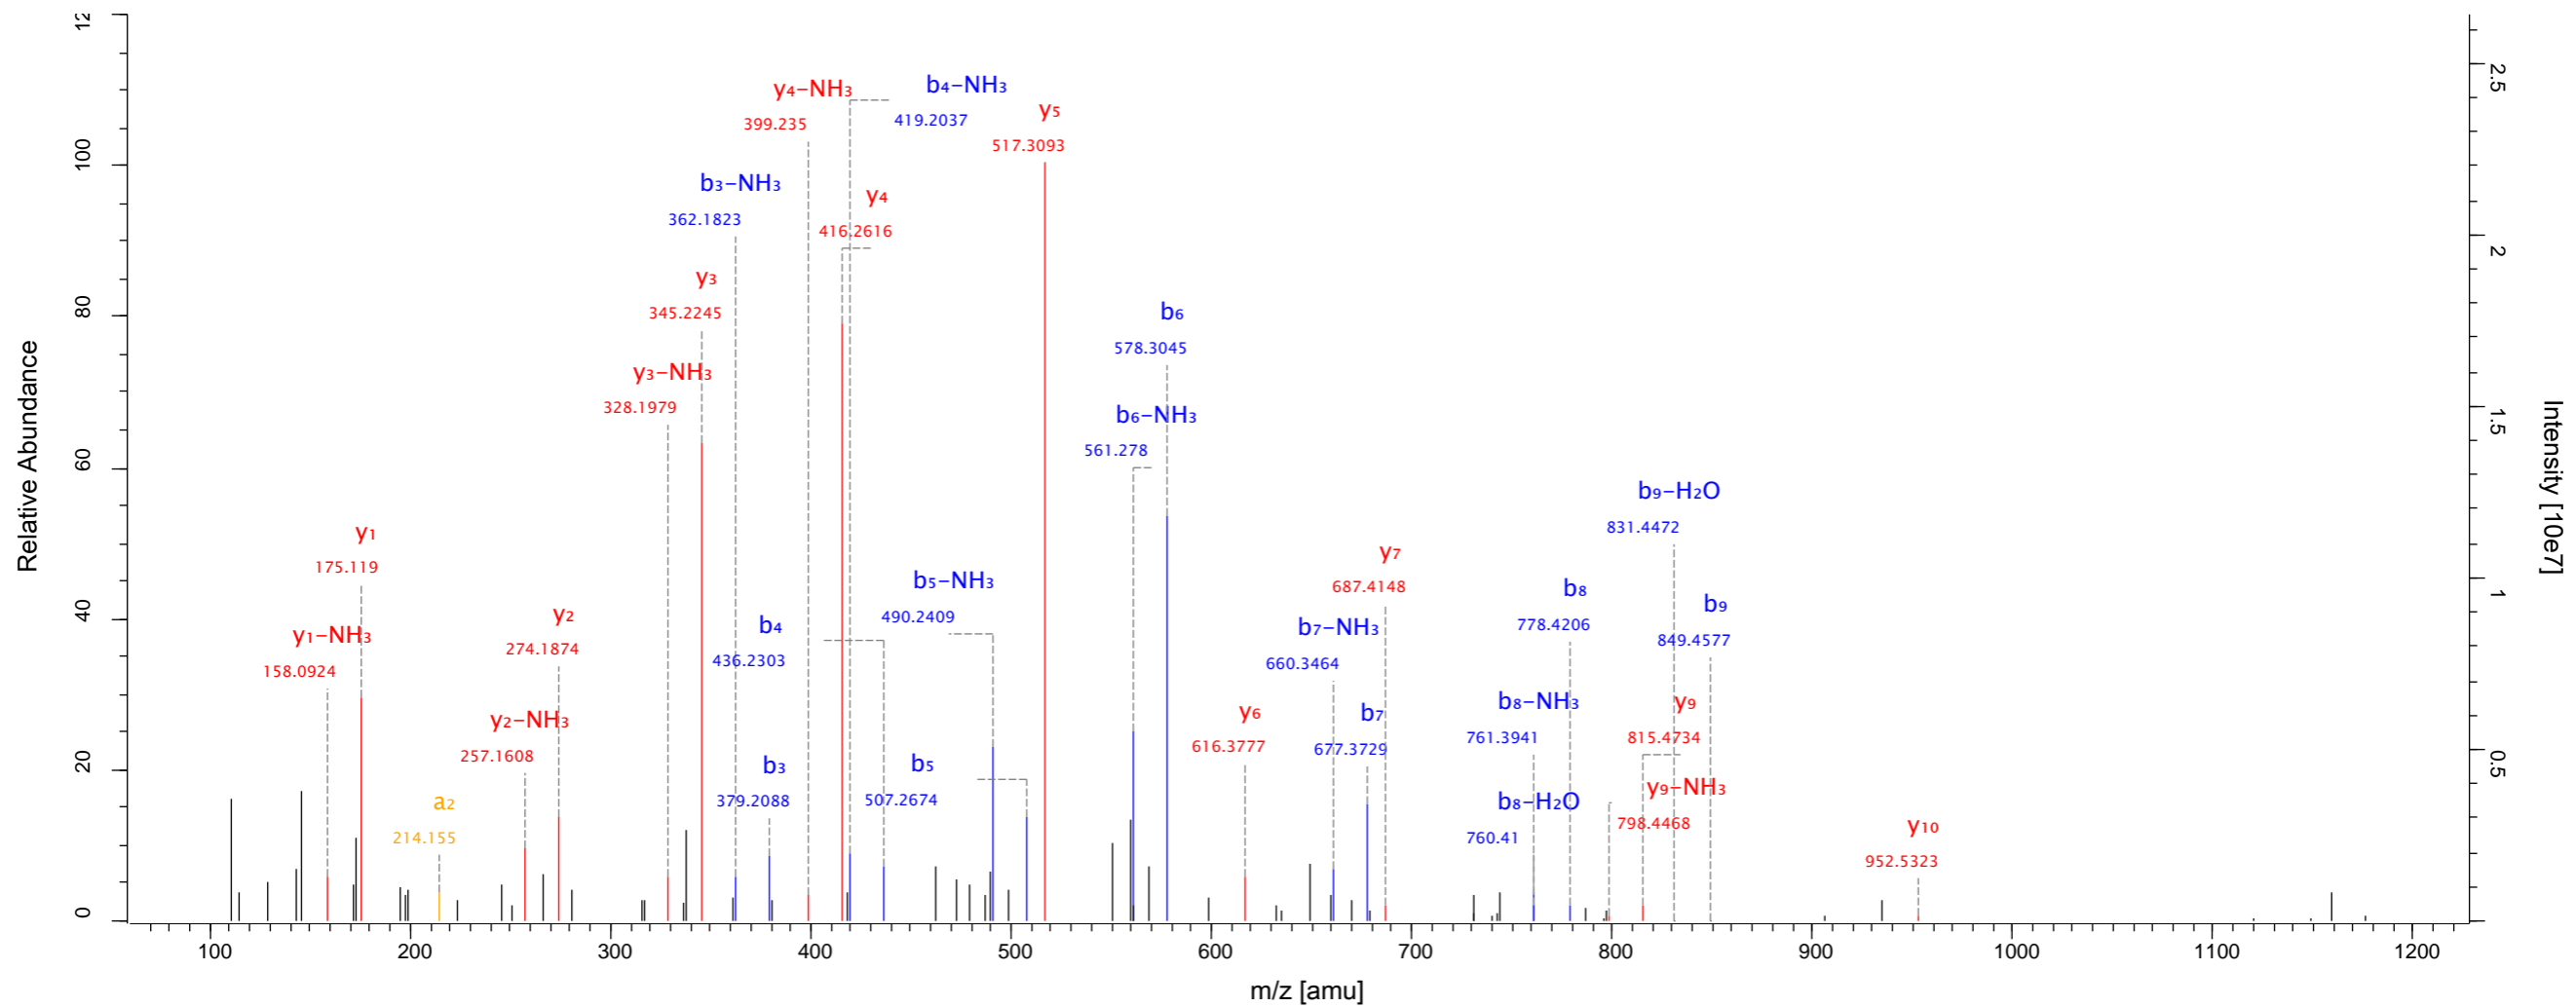



Raw file: 20111212\_EXQ5\_AnMi\_QC\_HCMVp1\_27  
 Scan number: 11789  
 Protein: ORFL237C - NC\_006273.2[149340,149699]- <unknown description>  
 Peptide score: 146.27  
 Method: FTMS; HCD

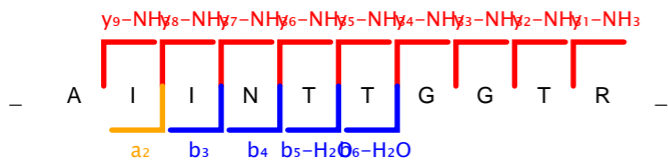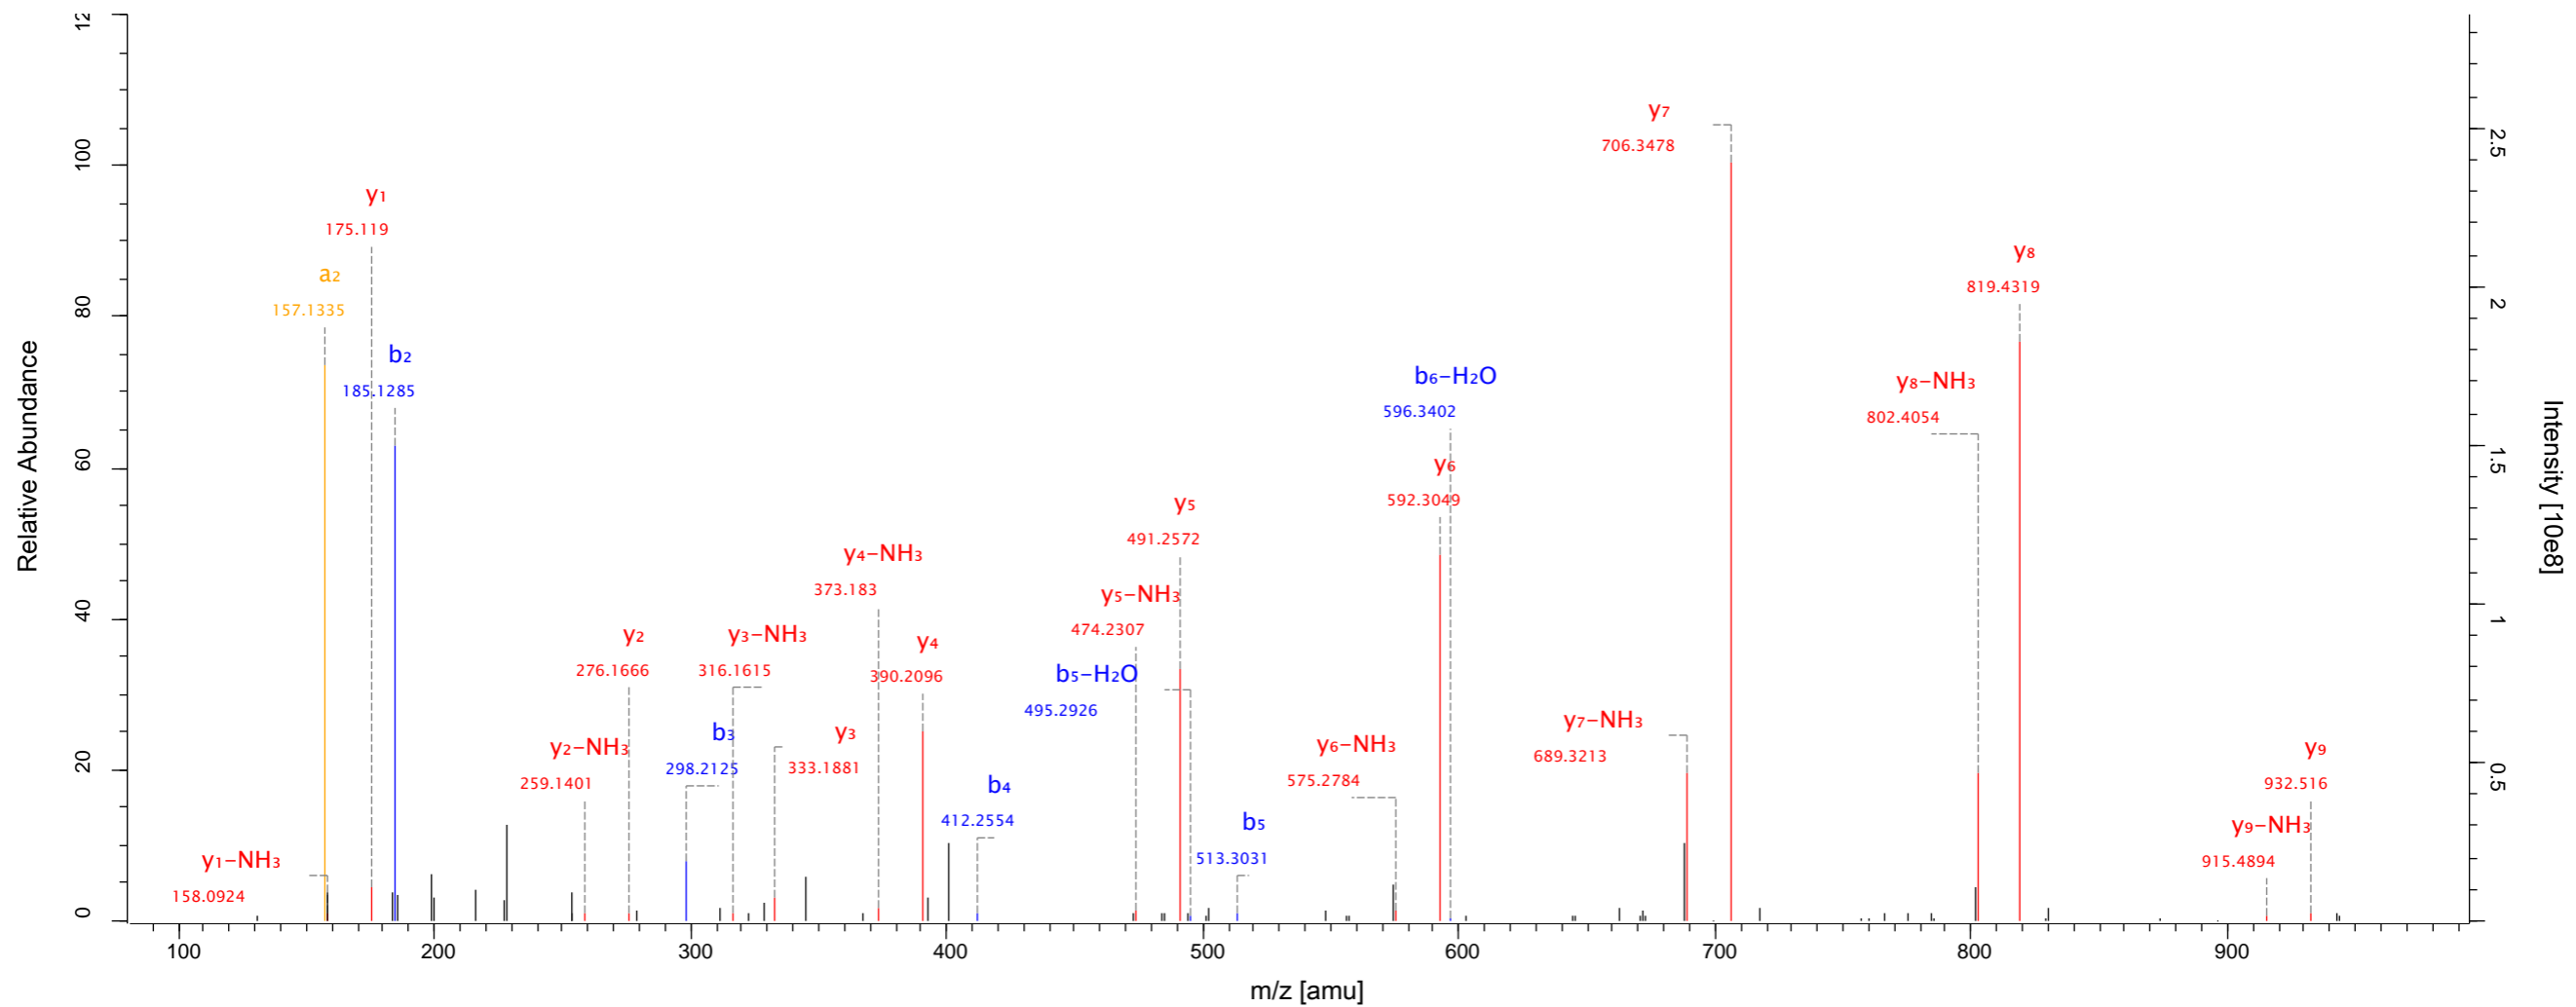

Raw file: 20111212\_EXQ5\_AnMi\_QC\_HCMVpl1\_27  
Scan number: 12291  
Protein: ORFL224C.iORF1 - NC\_006273.2[134354,134734]- <unknown description>  
Peptide score: 131.26  
Method: FTMS; HCD

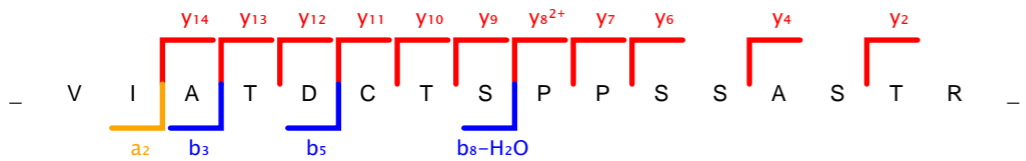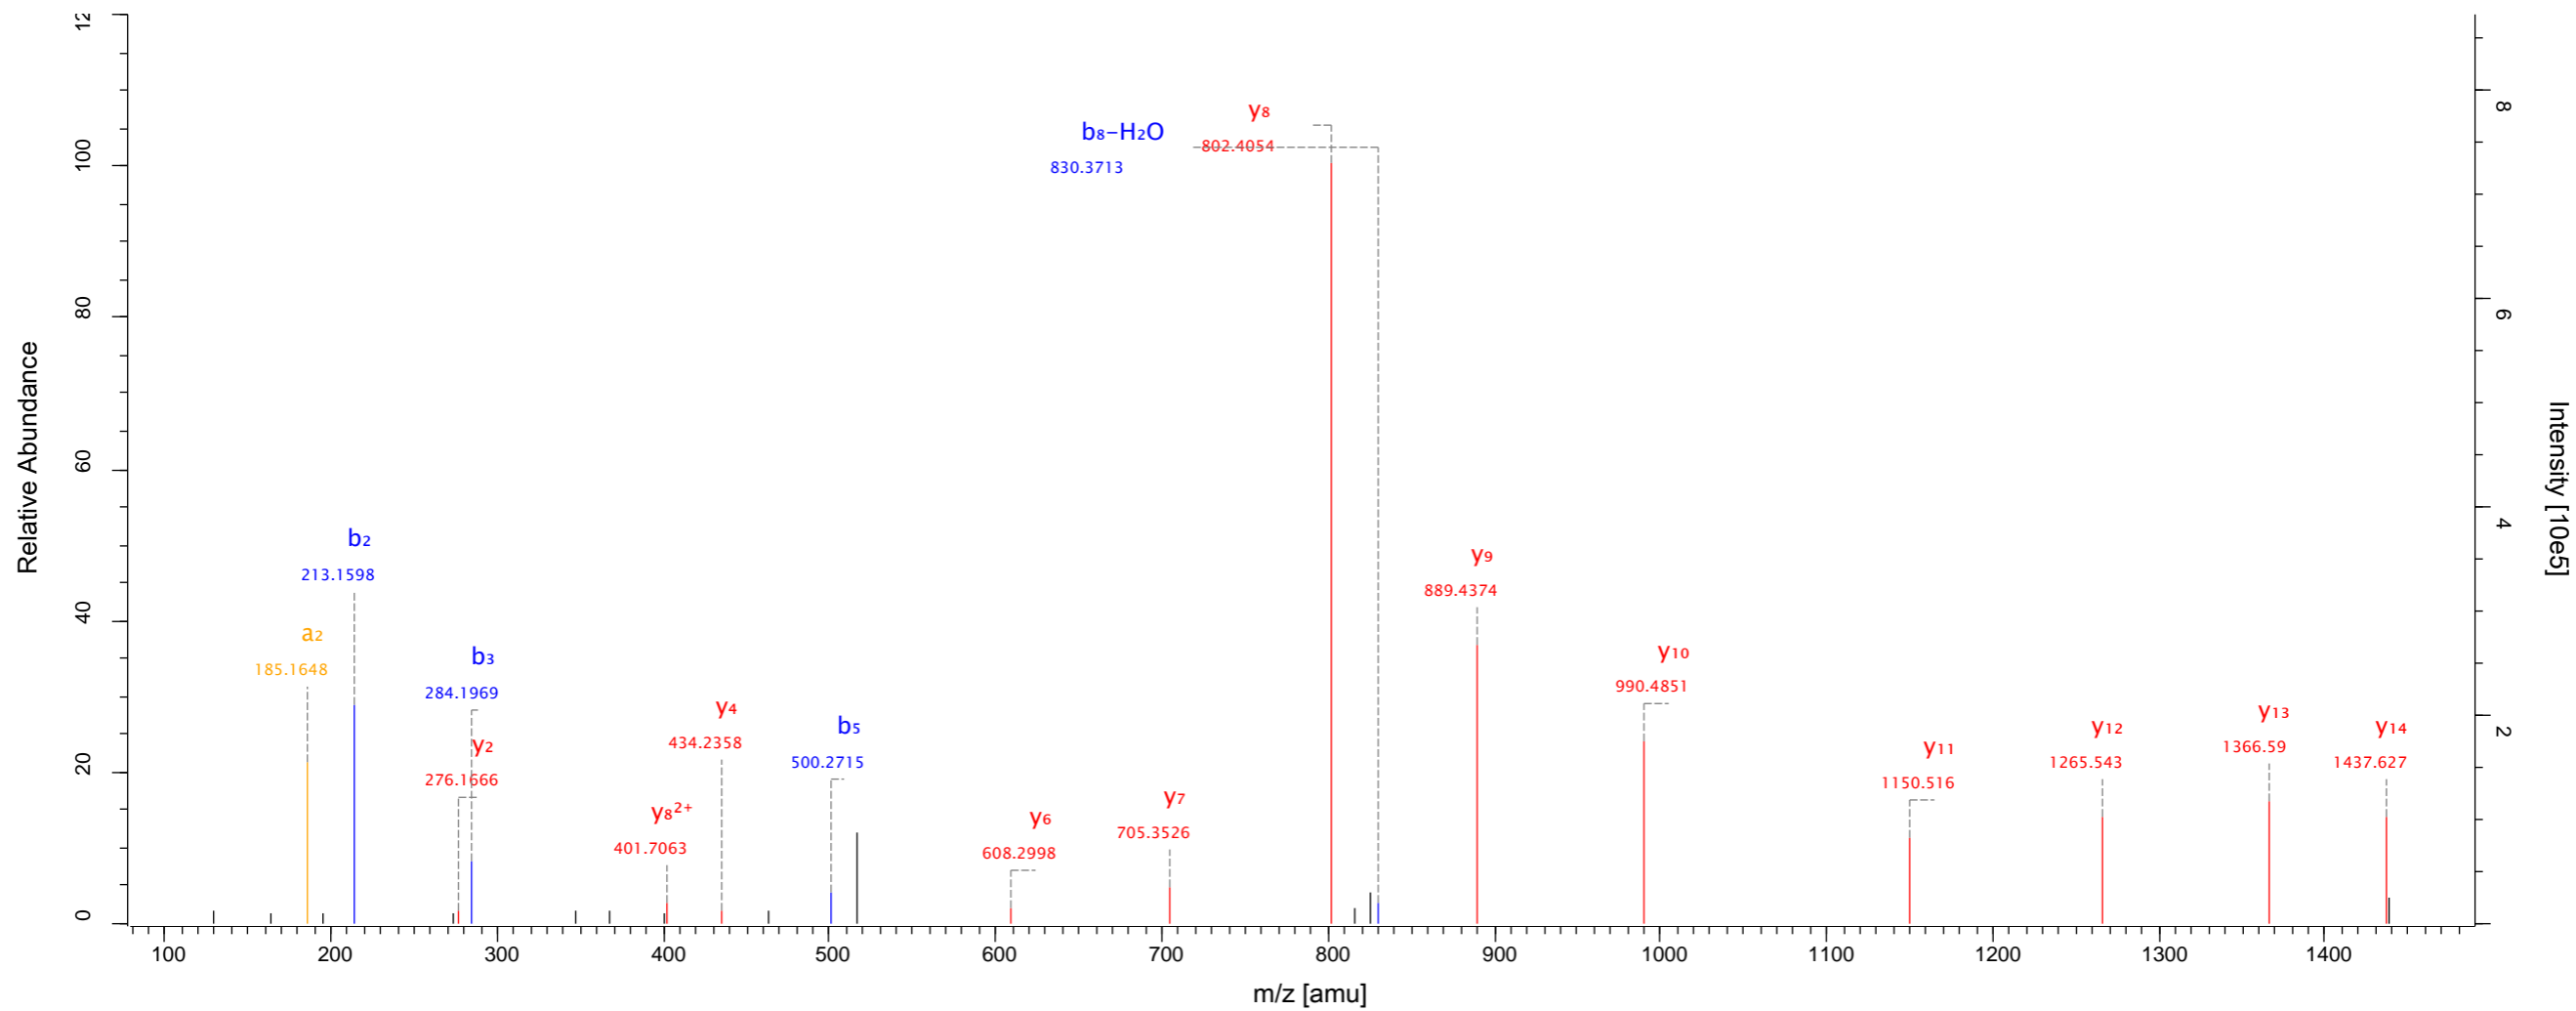

Raw file: 20111212\_EXQ5\_AnMi\_QC\_HCMVp1\_27  
 Scan number: 13569  
 Protein: ORFL190C - NC\_006273.2[111965,112384]- <unknown description>  
 Peptide score: 162.64  
 Method: FTMS; HCD

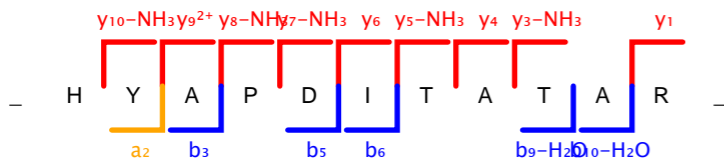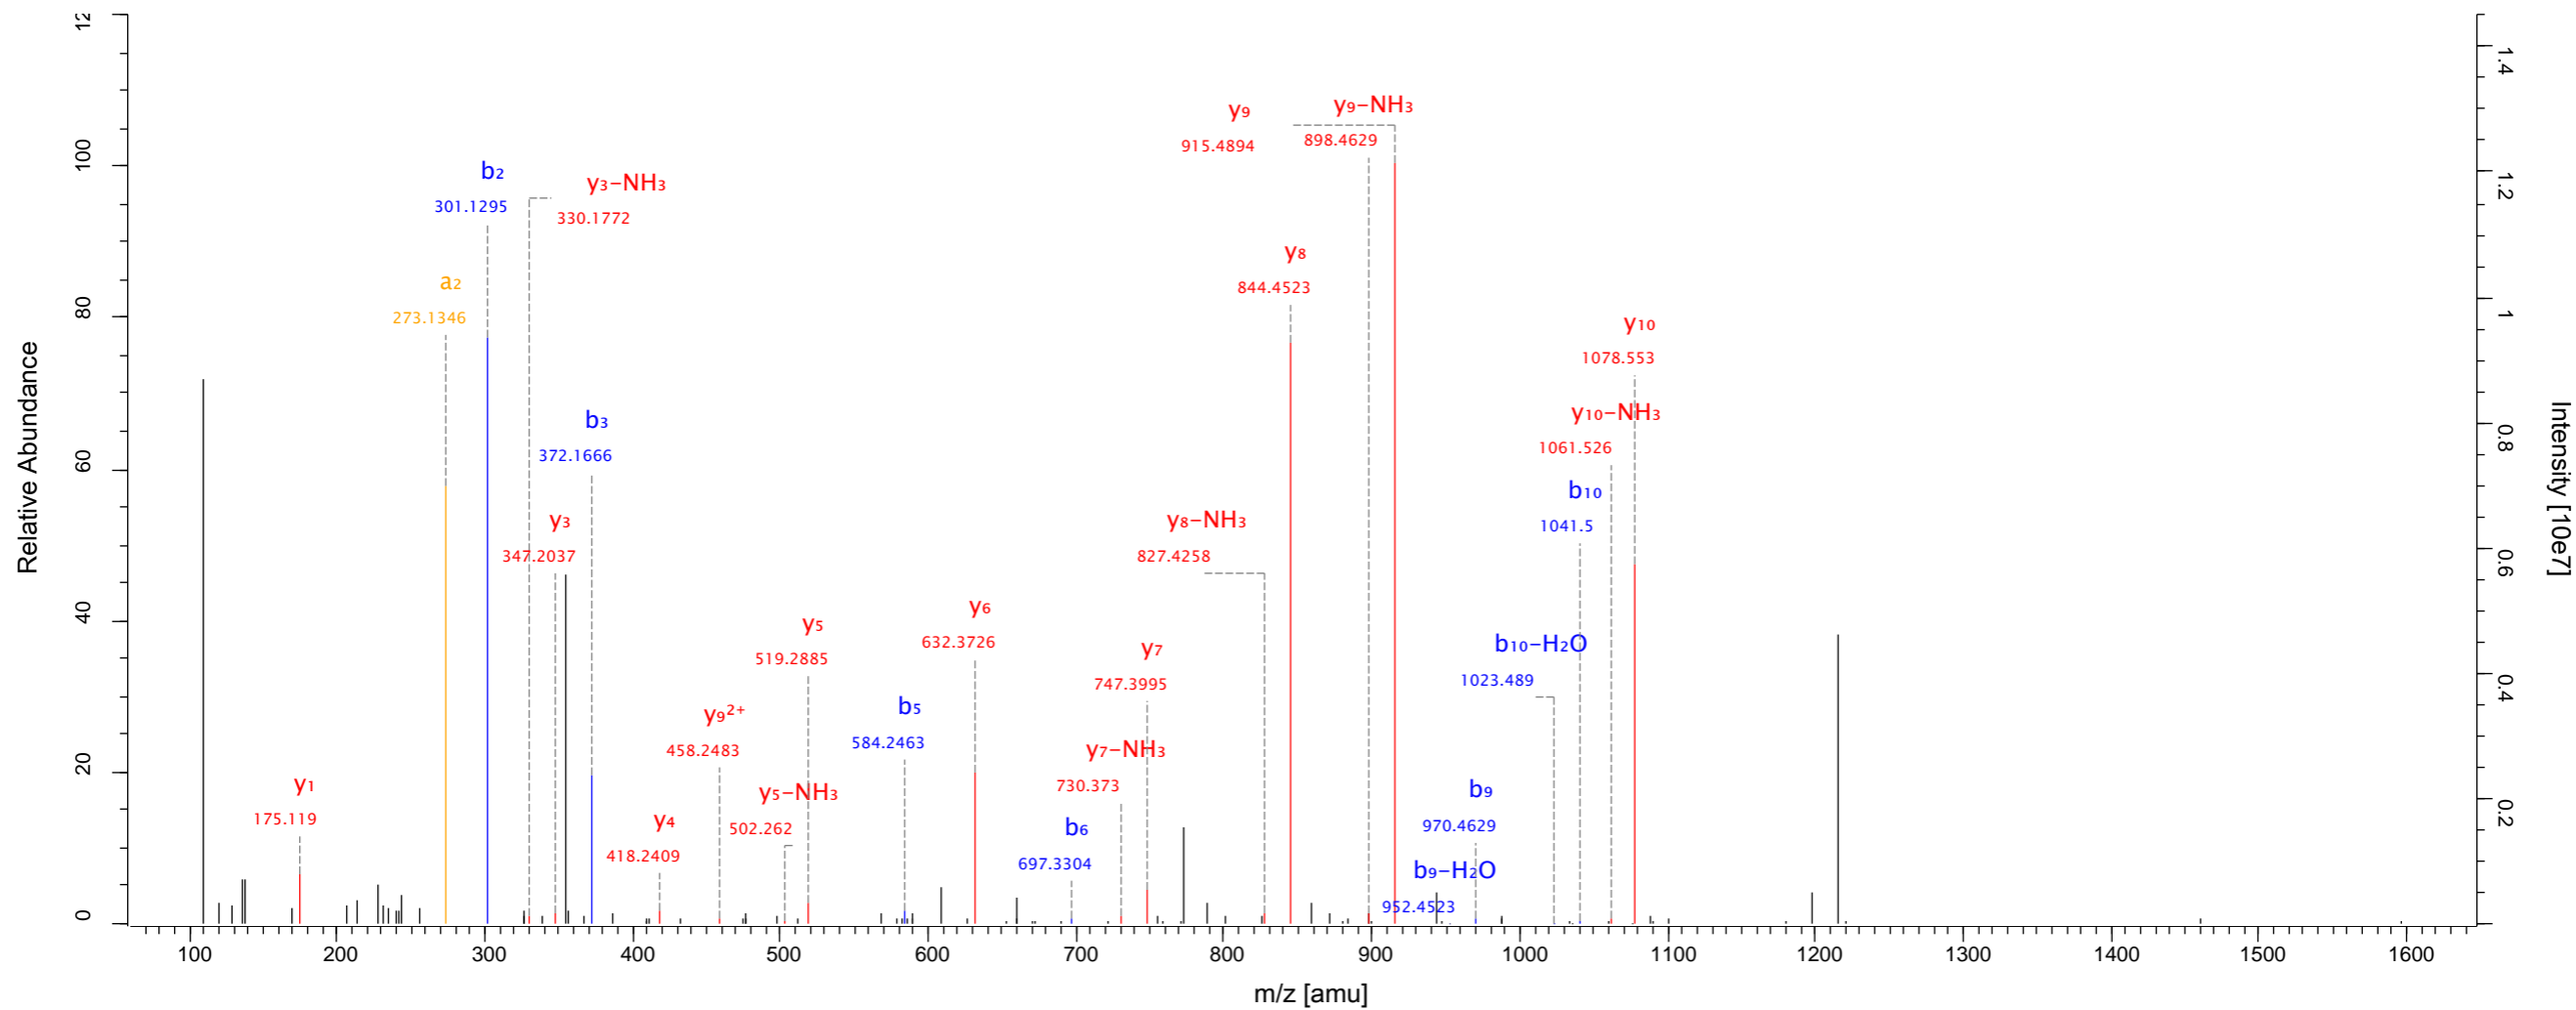

Raw file: 20111212\_EXQ5\_AnMi\_QC\_HCMVp11\_27  
 Scan number: 13591  
 Protein: ORFL185C - NC\_006273.2[111134,111490]- <unknown description>; ORFL184C.iORF3 - NC\_006273.2[111134,111379]- <unknown description>  
 Peptide score: 130.31  
 Method: FTMS; HCD

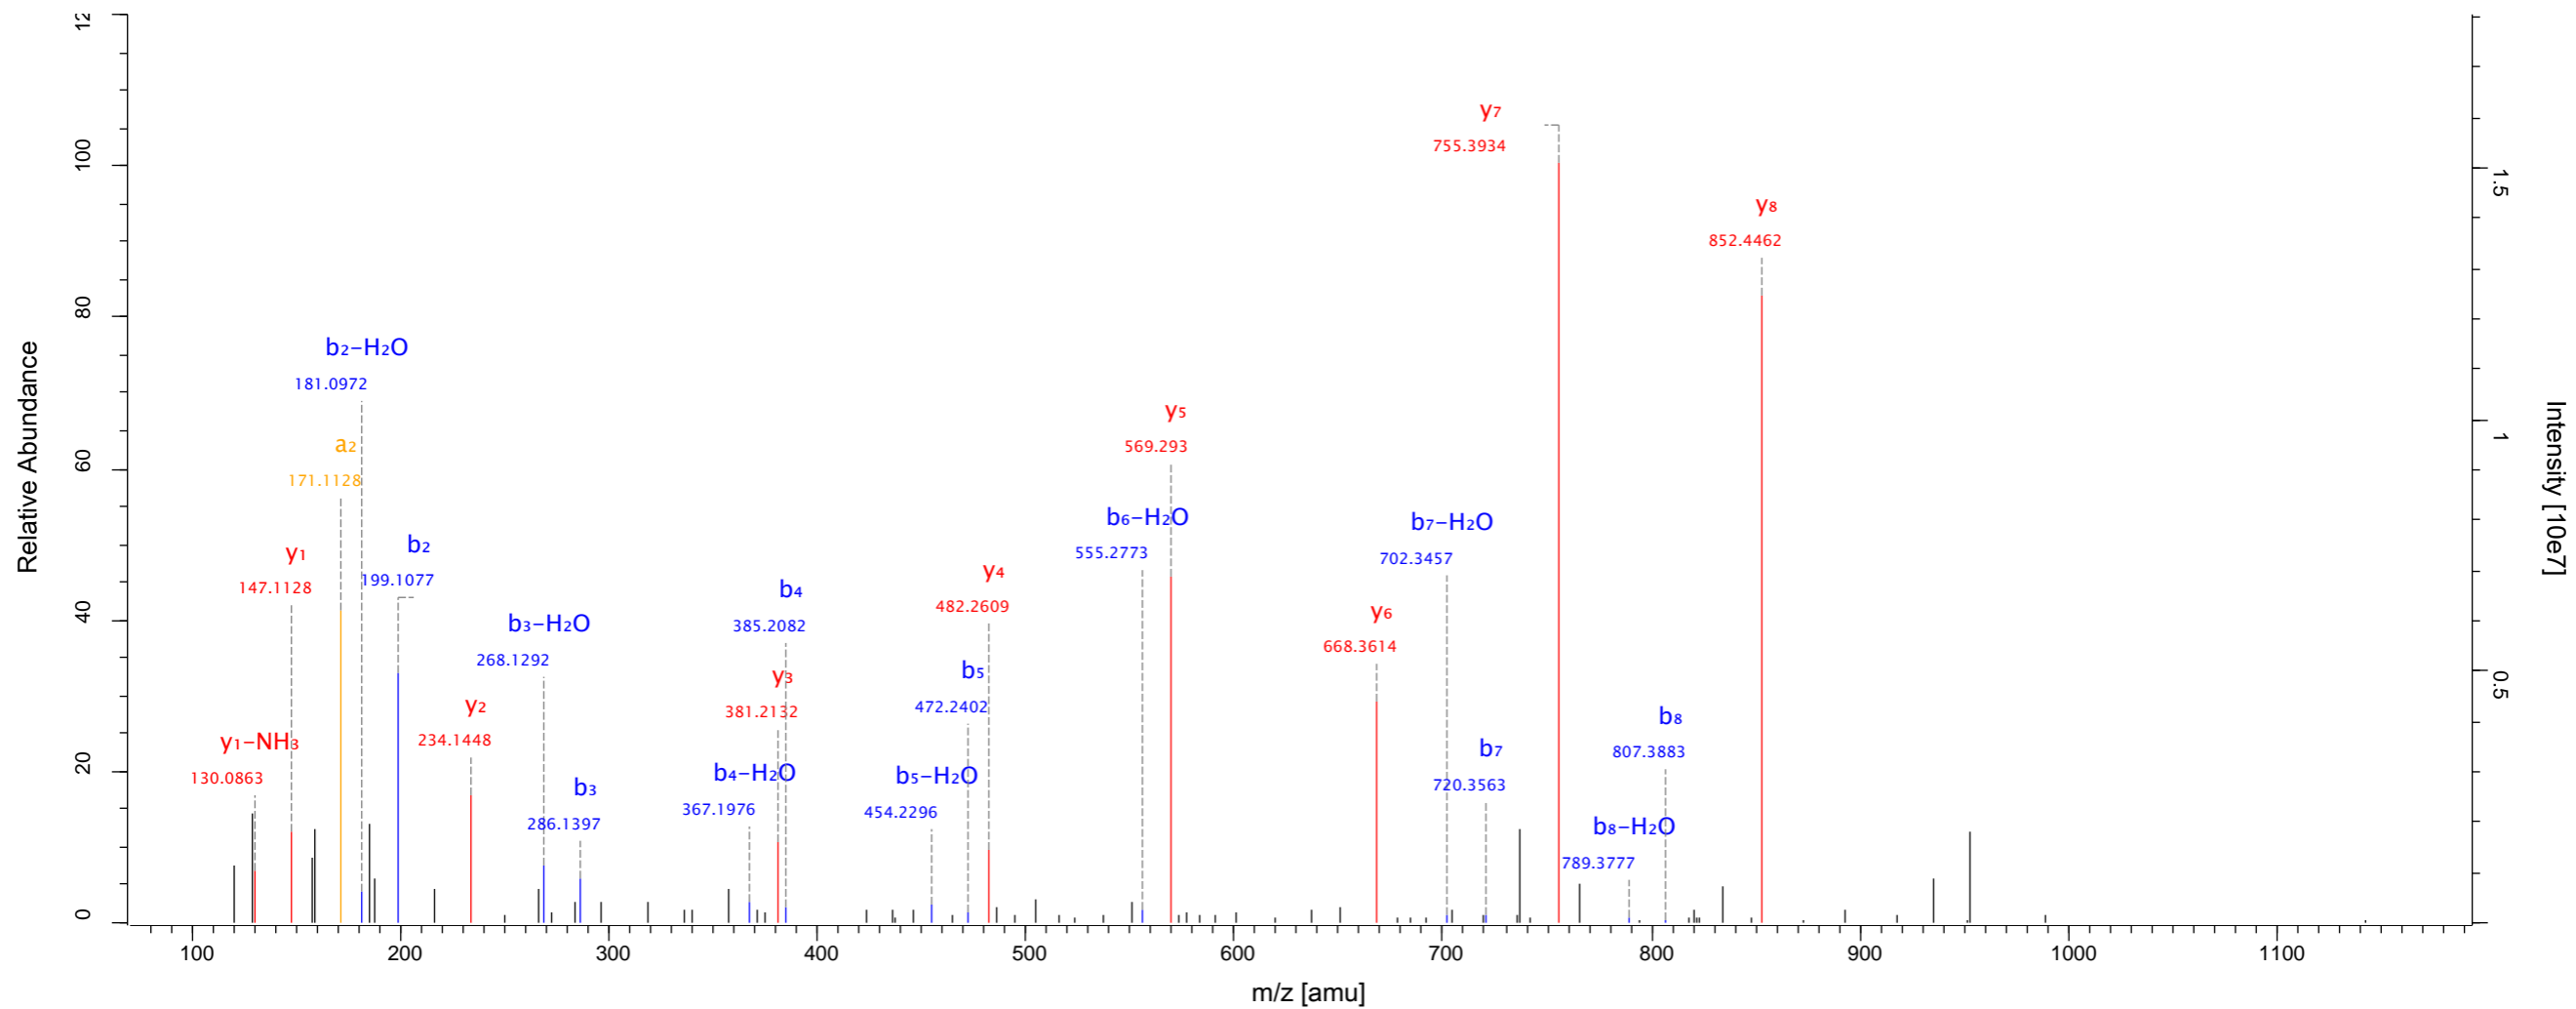

Raw file: 20111212\_EXQ5\_AnMi\_QC\_HCMVp11\_27  
Scan number: 15863  
Protein: ORFS365W + NC\_006273.2[225950,226606]+ <unknown description>  
Peptide score: 116.3  
Method: FTMS; HCD

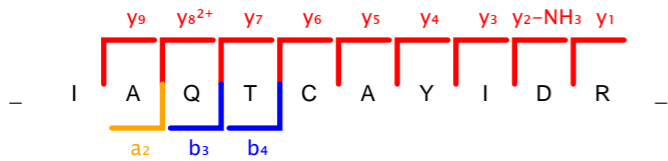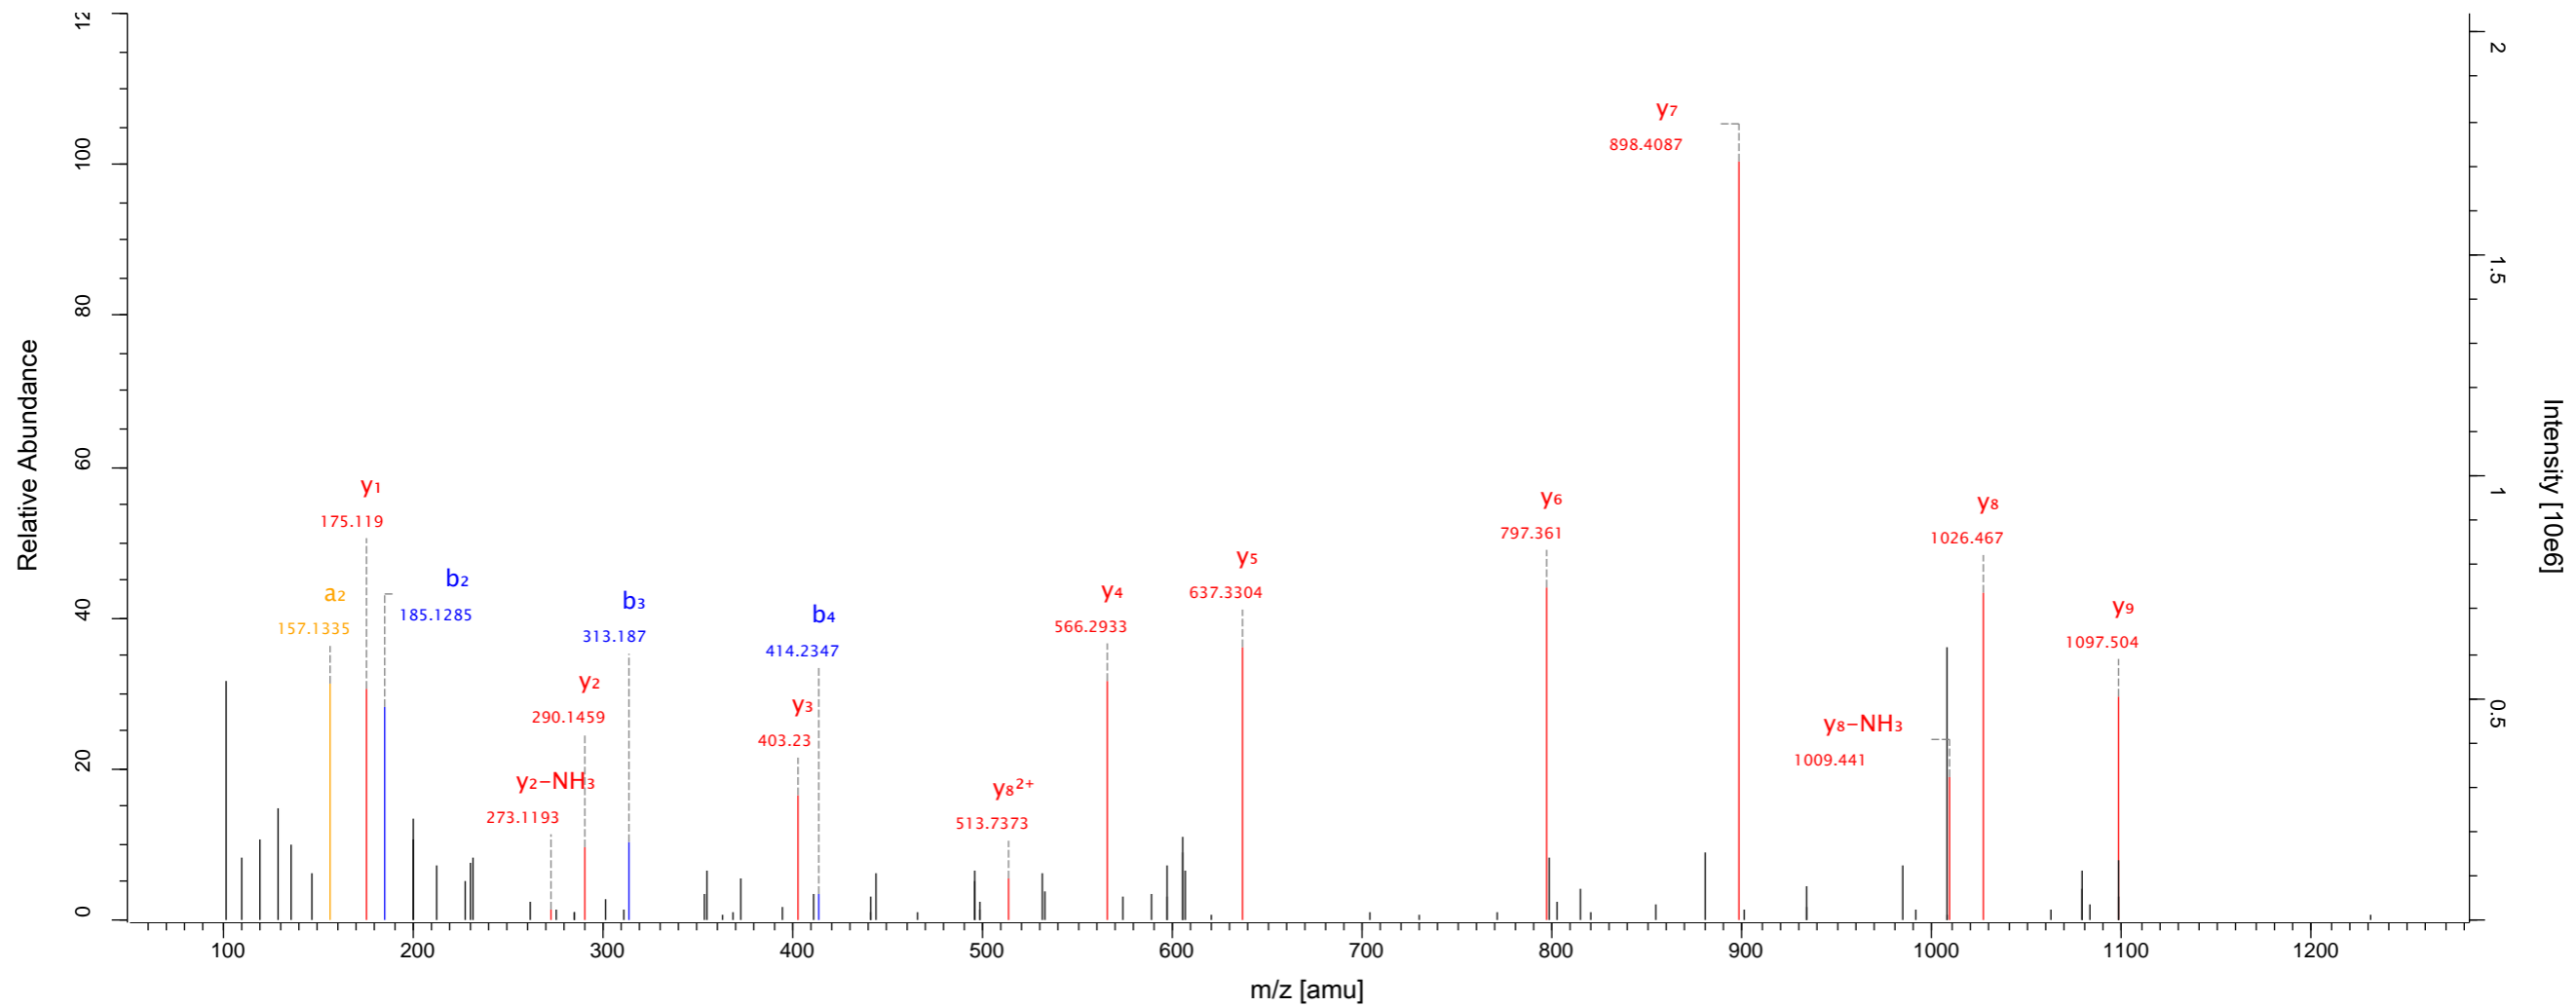

Raw file: 20111212\_EXQ5\_AnMi\_QC\_HCMVp11\_27  
 Scan number: 15934  
 Protein: ORFL321W + NC\_006273.2[191968,194126]+ <unknown description>; ORFL321W.iORF1 + NC\_006273.2[191968,194126]+ <unknown description>  
 Peptide score: 32.08  
 Method: FTMS; HCD

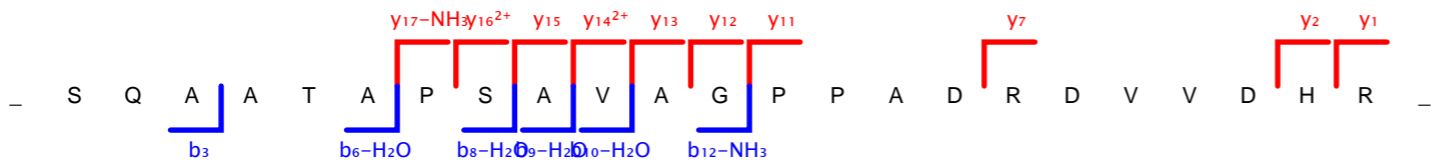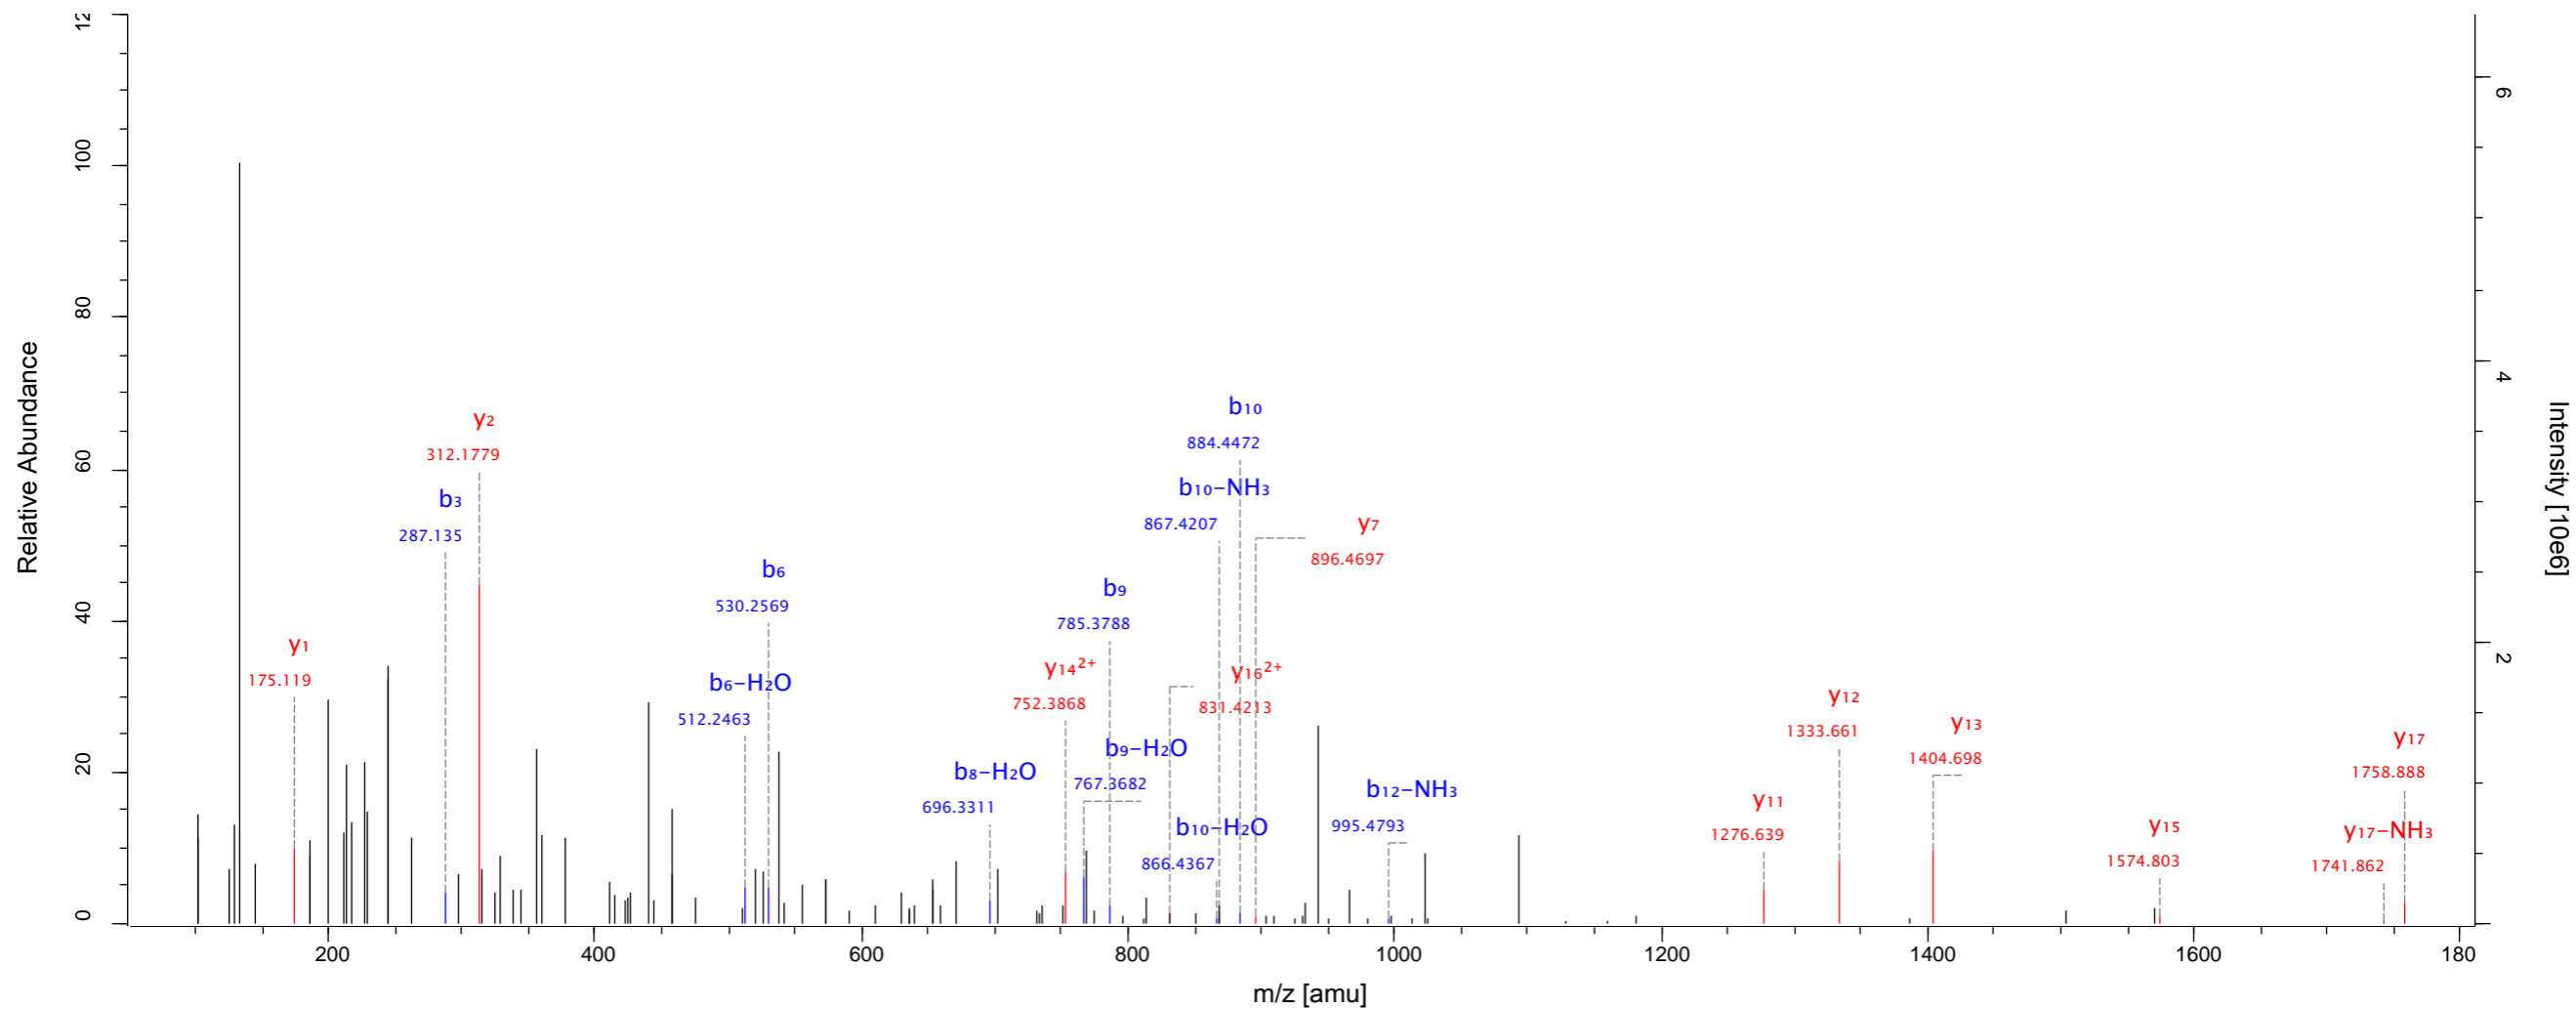

Raw file: 20111212\_EXQ5\_AnMi\_QC\_HCMVp1\_27  
Scan number: 17229  
Protein: ORFS365W + NC\_006273.2[225950,226606]+ <unknown description>  
Peptide score: 66.43  
Method: FTMS; HCD

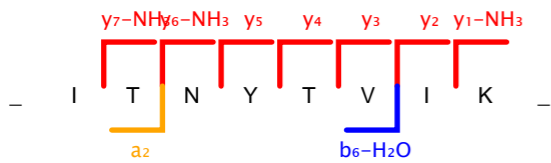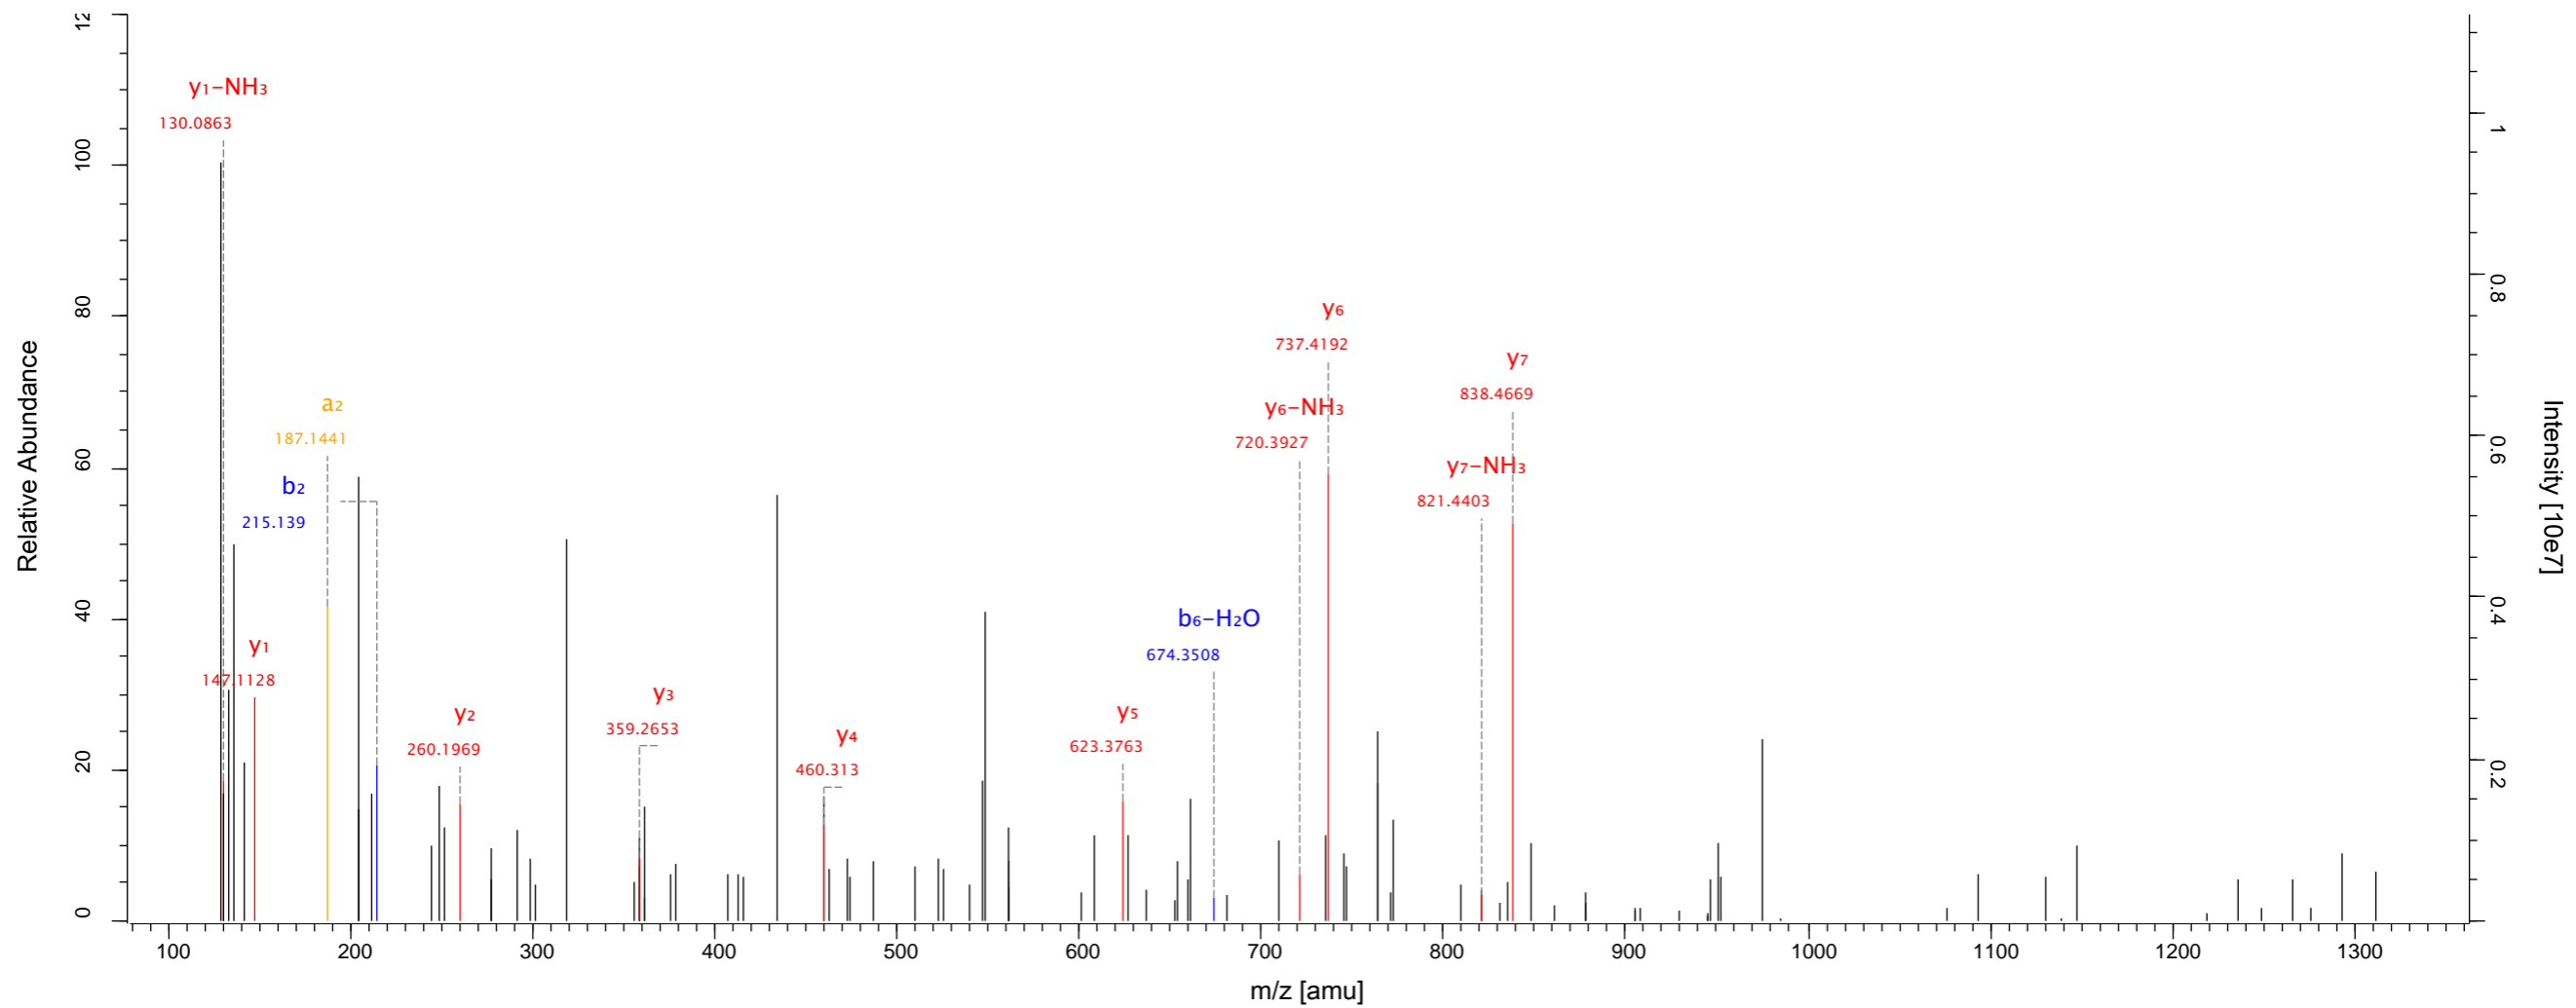

Raw file: 20111212\_EXQ5\_AnMi\_QC\_HCMVp1\_27  
 Scan number: 17558  
 Protein: ORFL234C - NC\_006273.2[148754,149149]- <unknown description>  
 Peptide score: 92.15  
 Method: FTMS; HCD

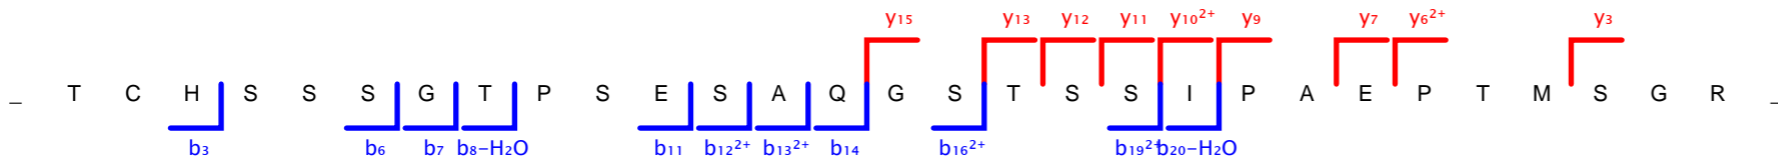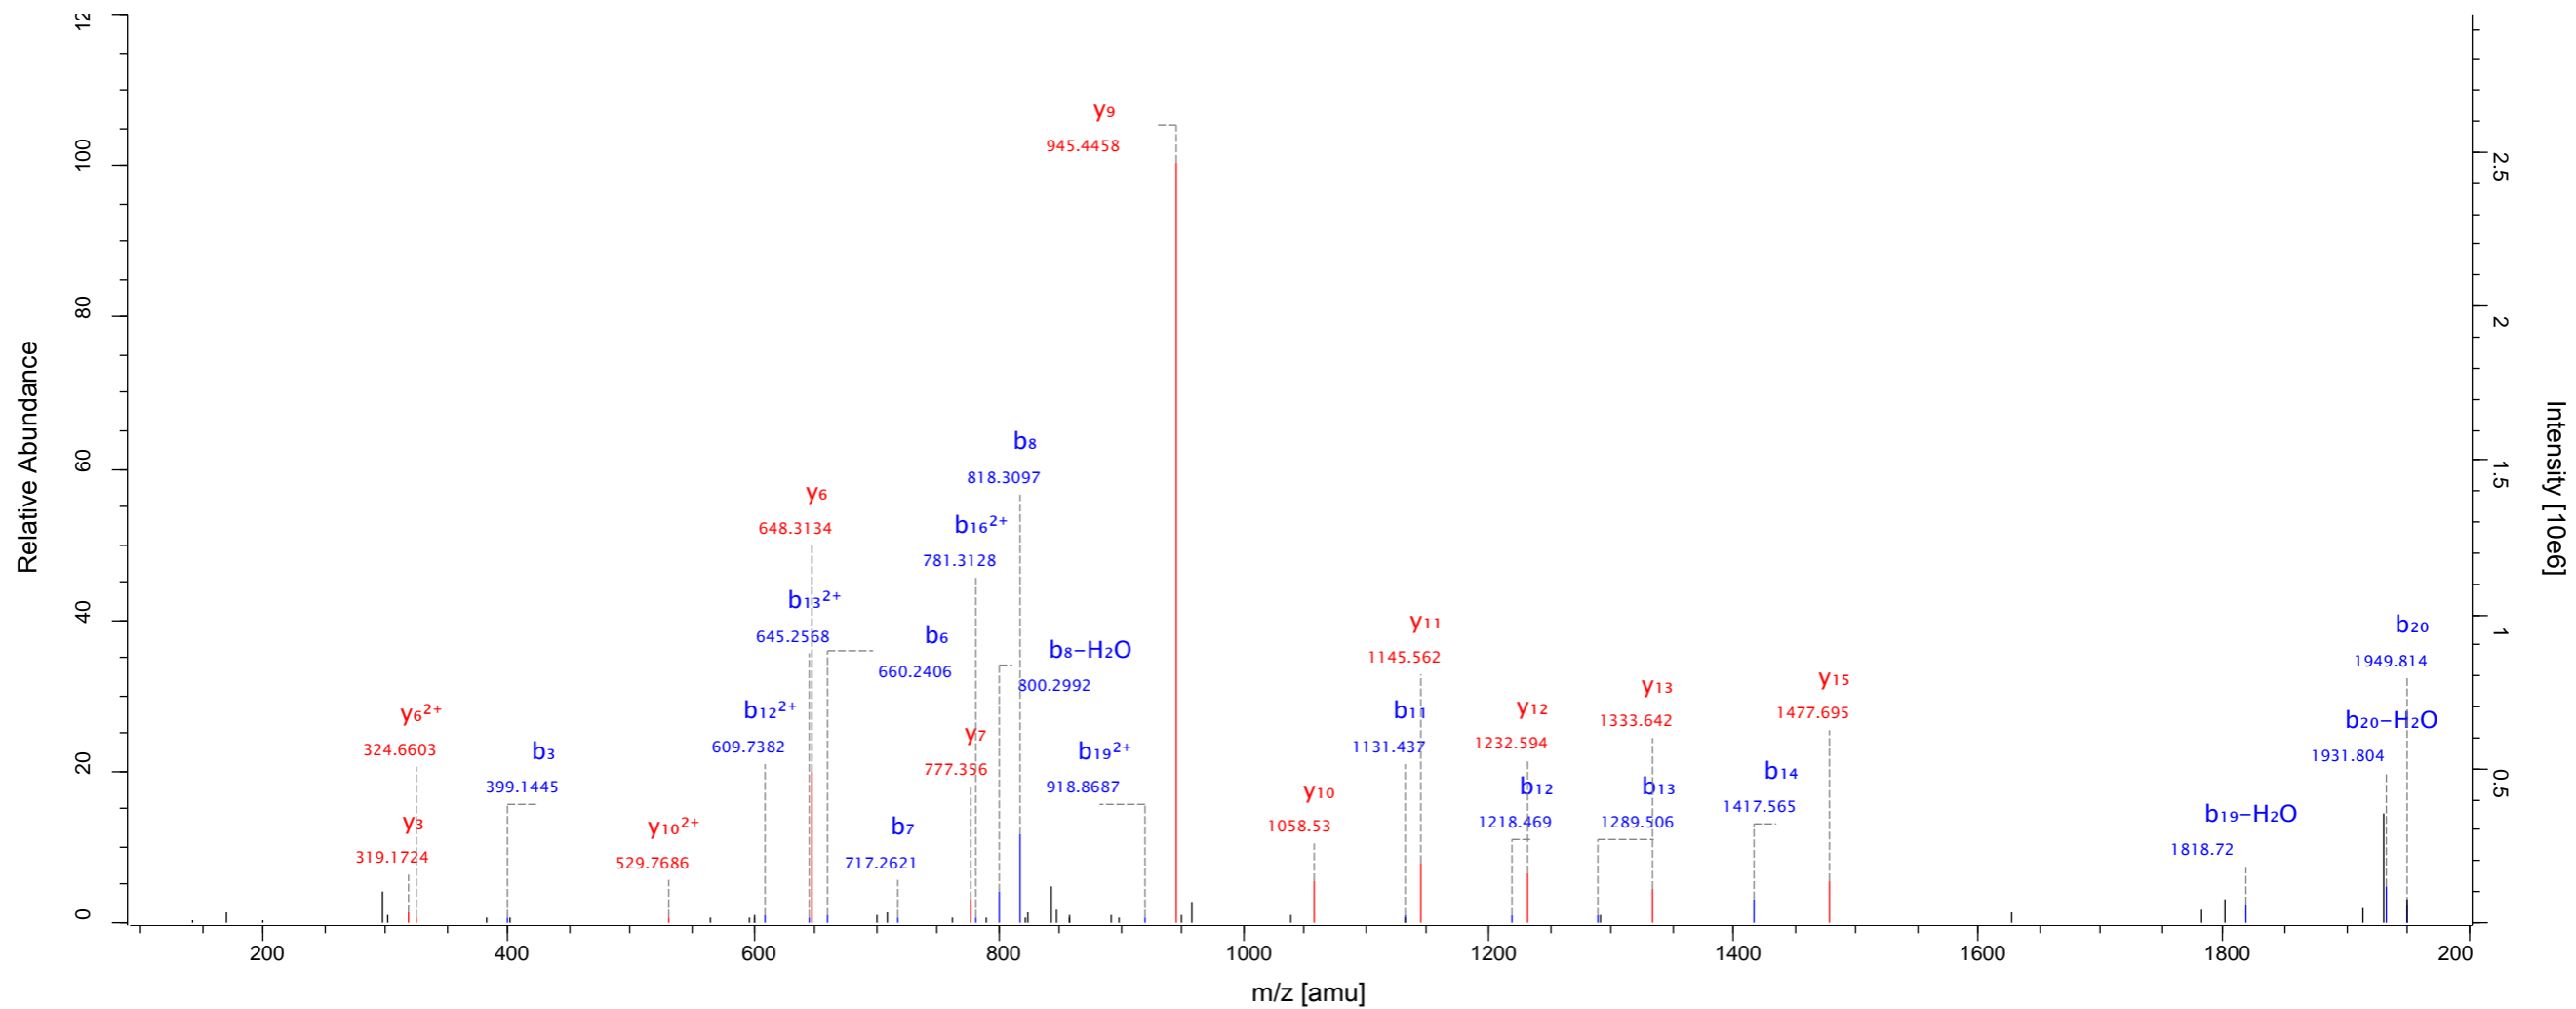



Raw file: 20111212\_EXQ5\_AnMi\_QC\_HCMVp11\_27  
 Scan number: 18282  
 Protein: ORFL237C - NC\_006273.2[149340,149699]- <unknown description>  
 Peptide score: 79.02  
 Method: FTMS; HCD

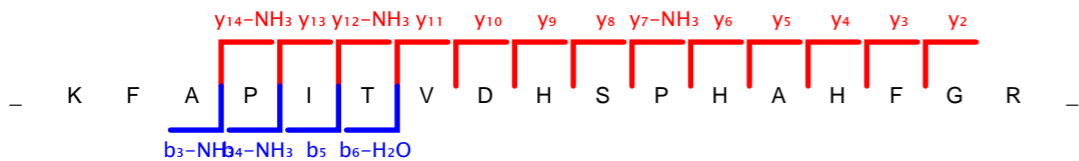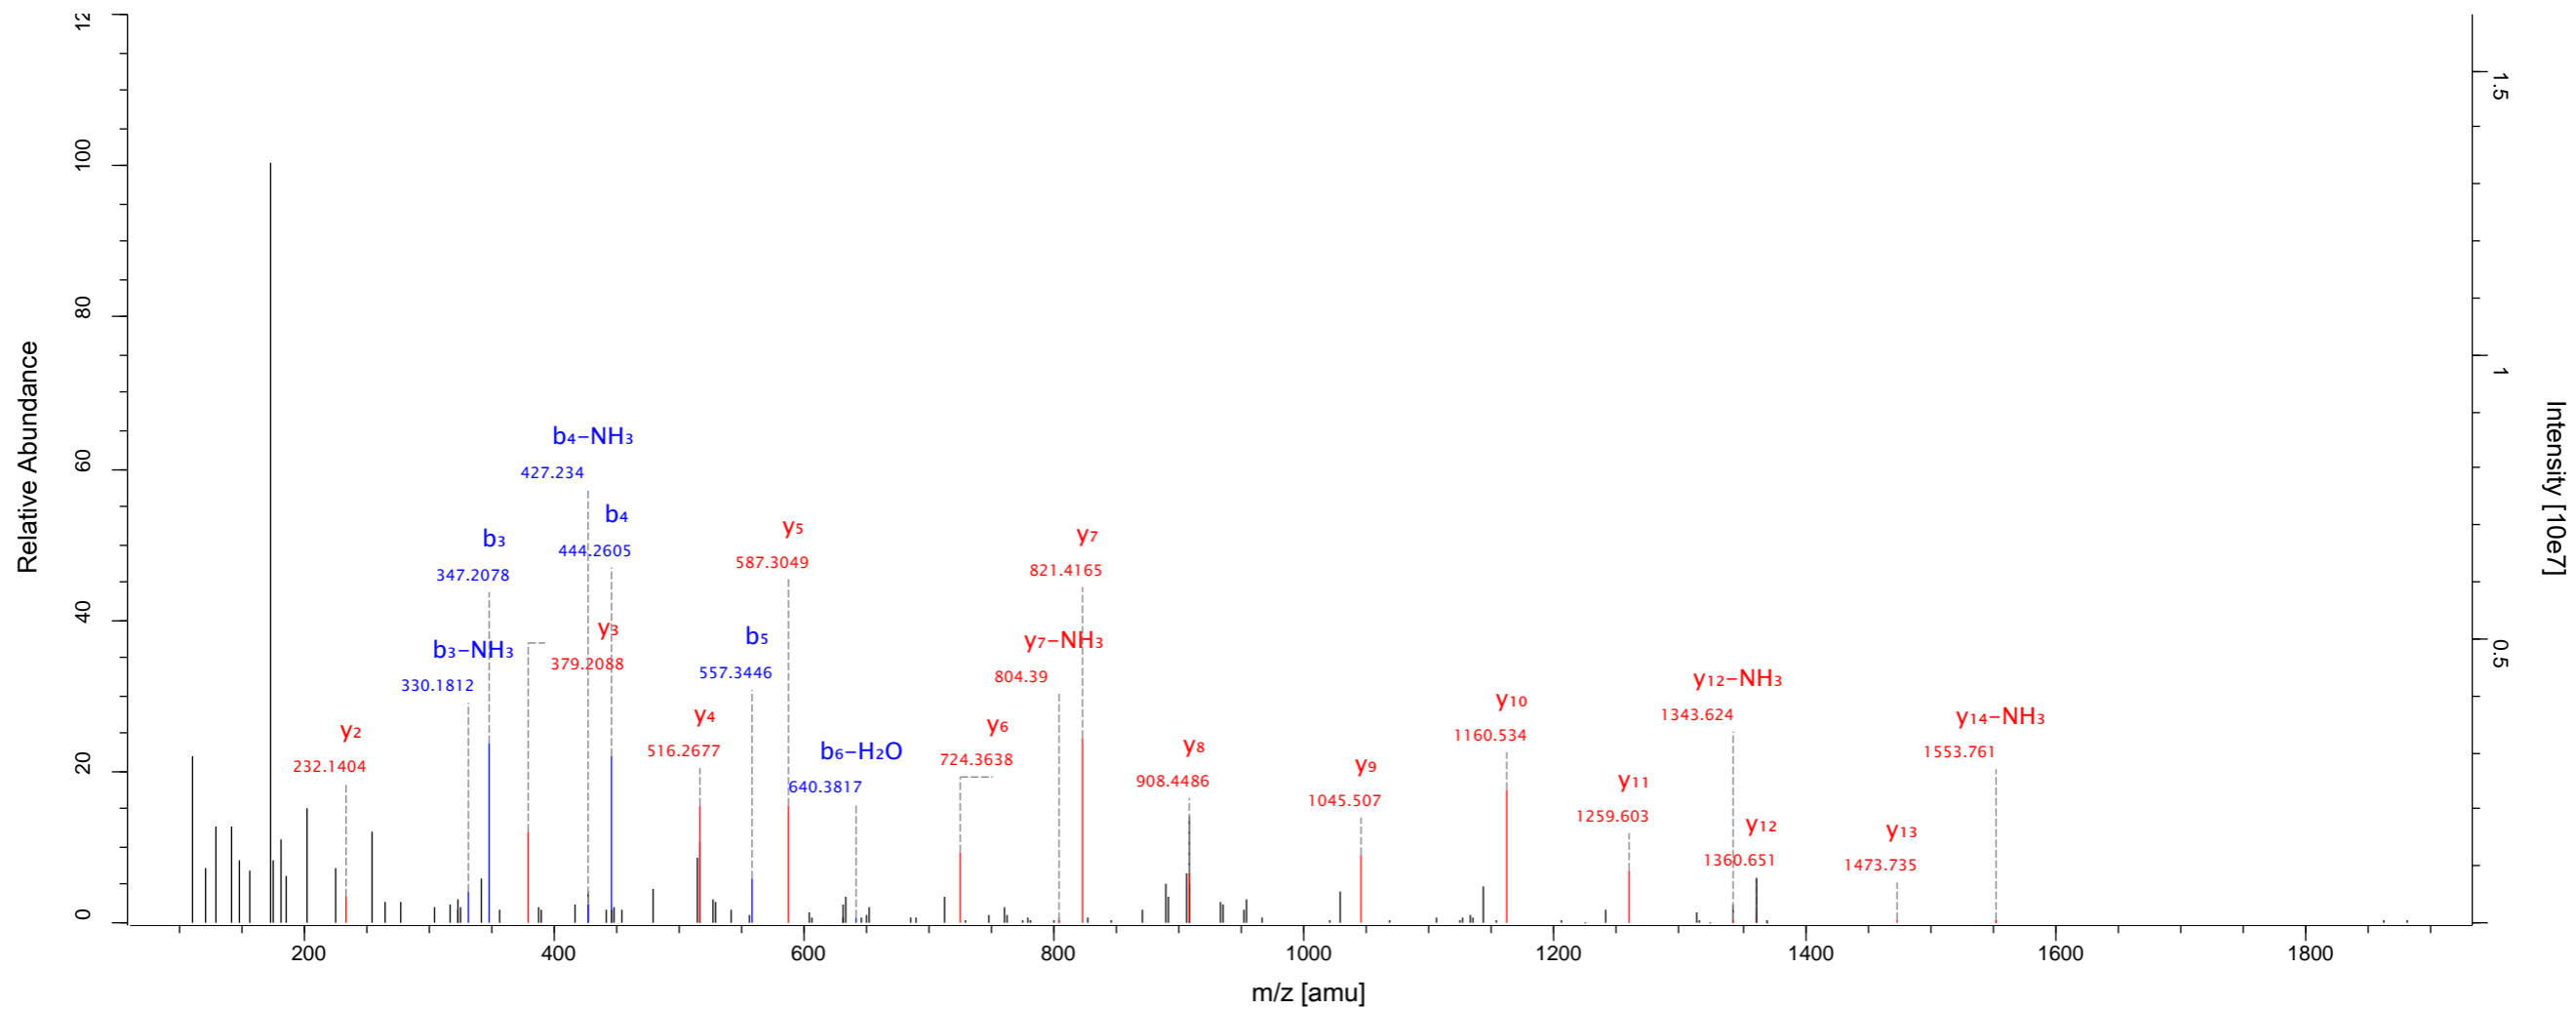

Raw file: 20111212\_EXQ5\_AnMi\_QC\_HCMVp1\_27  
Scan number: 19577  
Protein: ORFL224C.iORF1 - NC\_006273.2[134354,134734]- <unknown description>  
Peptide score: 80.76  
Method: FTMS; HCD

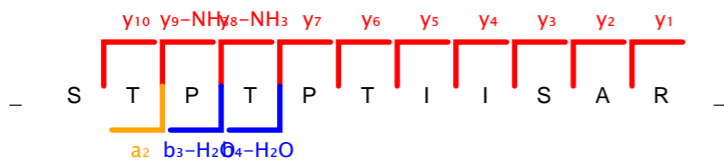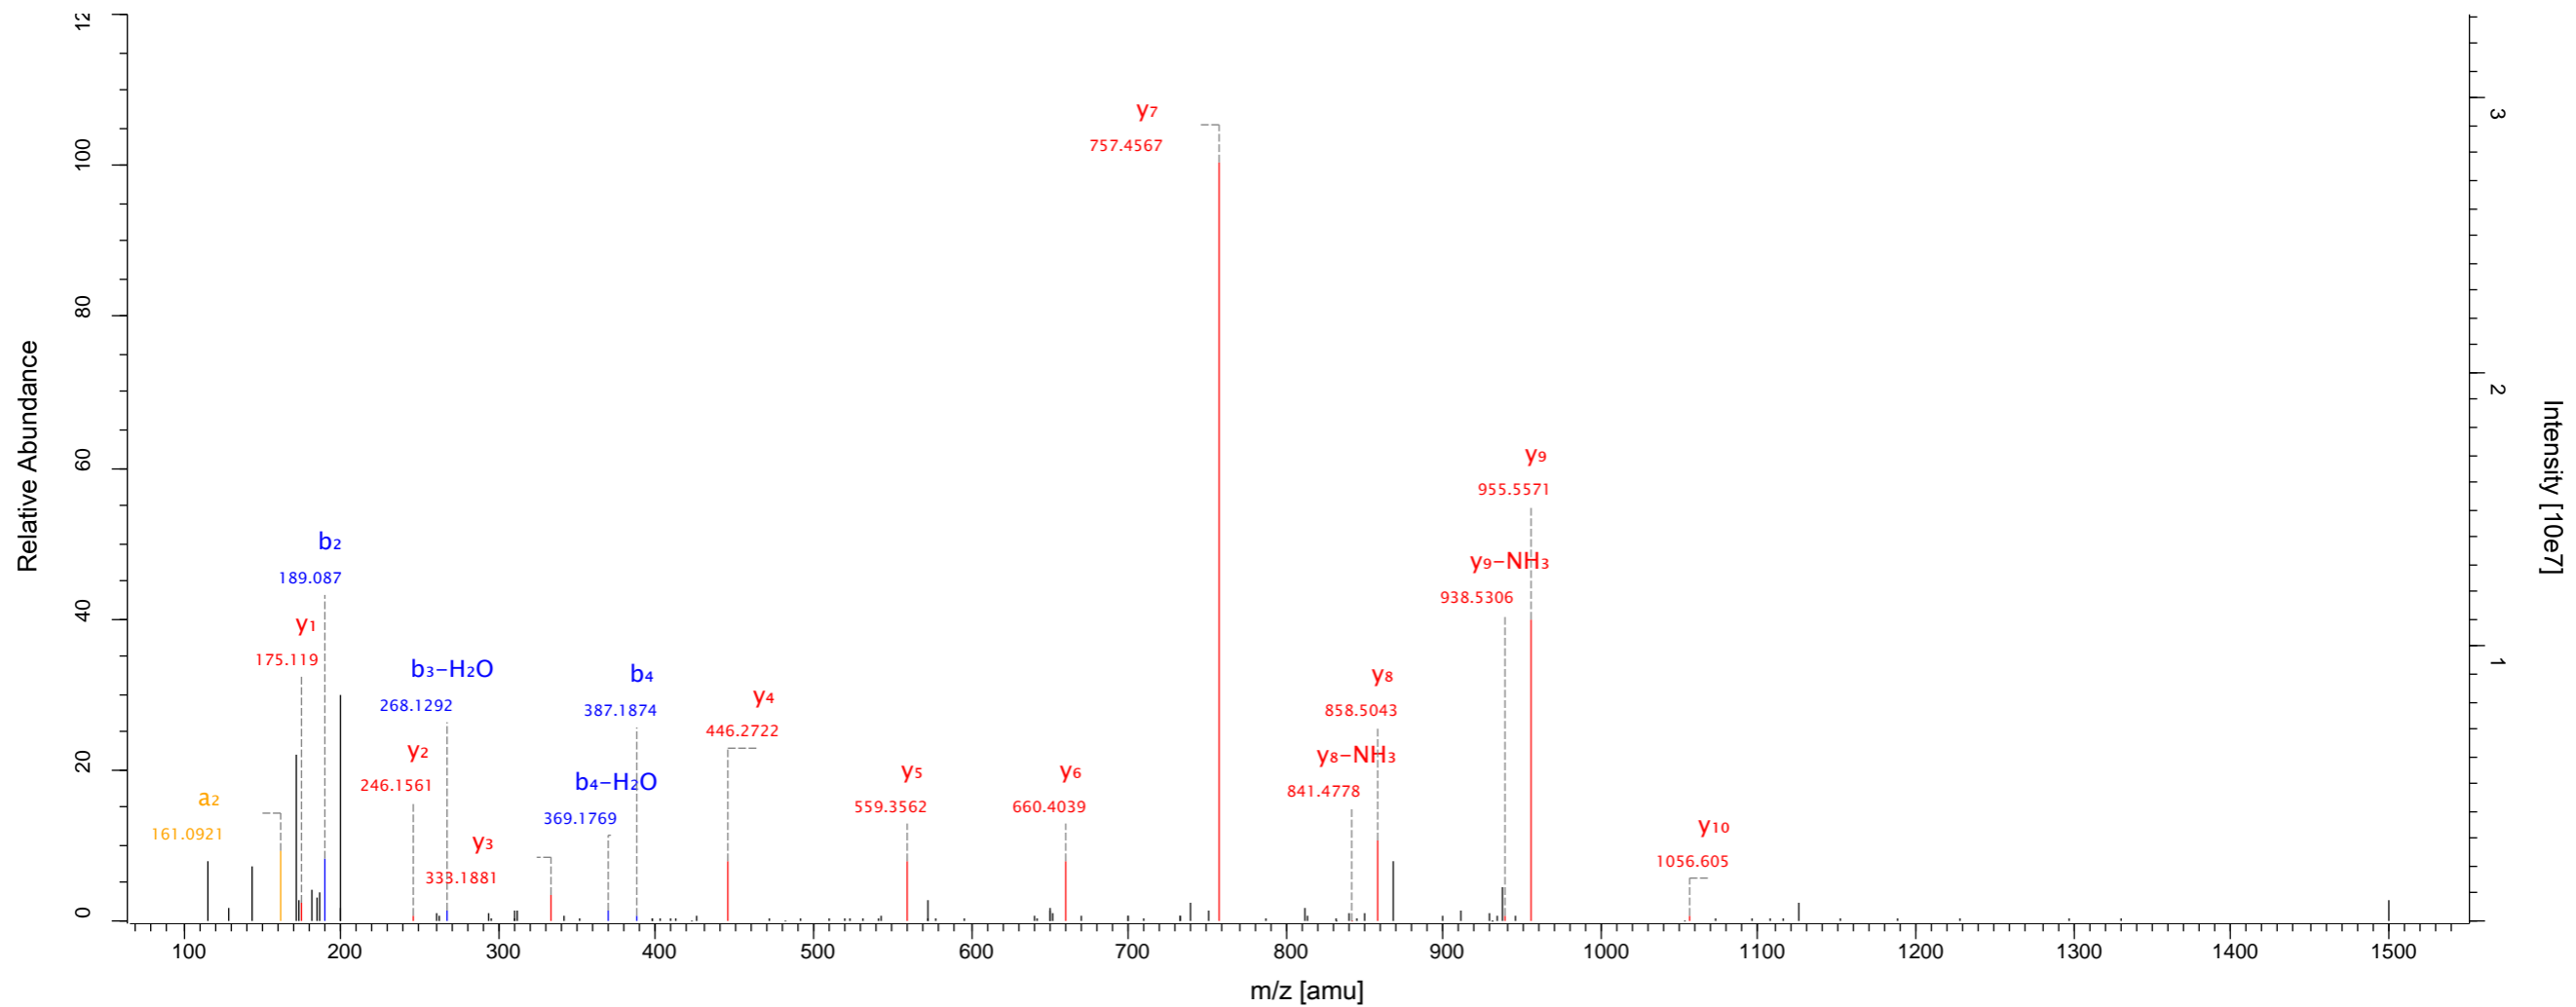

Raw file: 20111212\_EXQ5\_AnMi\_QC\_HCMVp11\_27  
Scan number: 19955  
Protein: ORFL237C - NC\_006273.2[149340,149699]- <unknown description>  
Peptide score: 99.92  
Method: FTMS; HCD

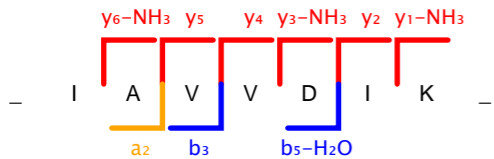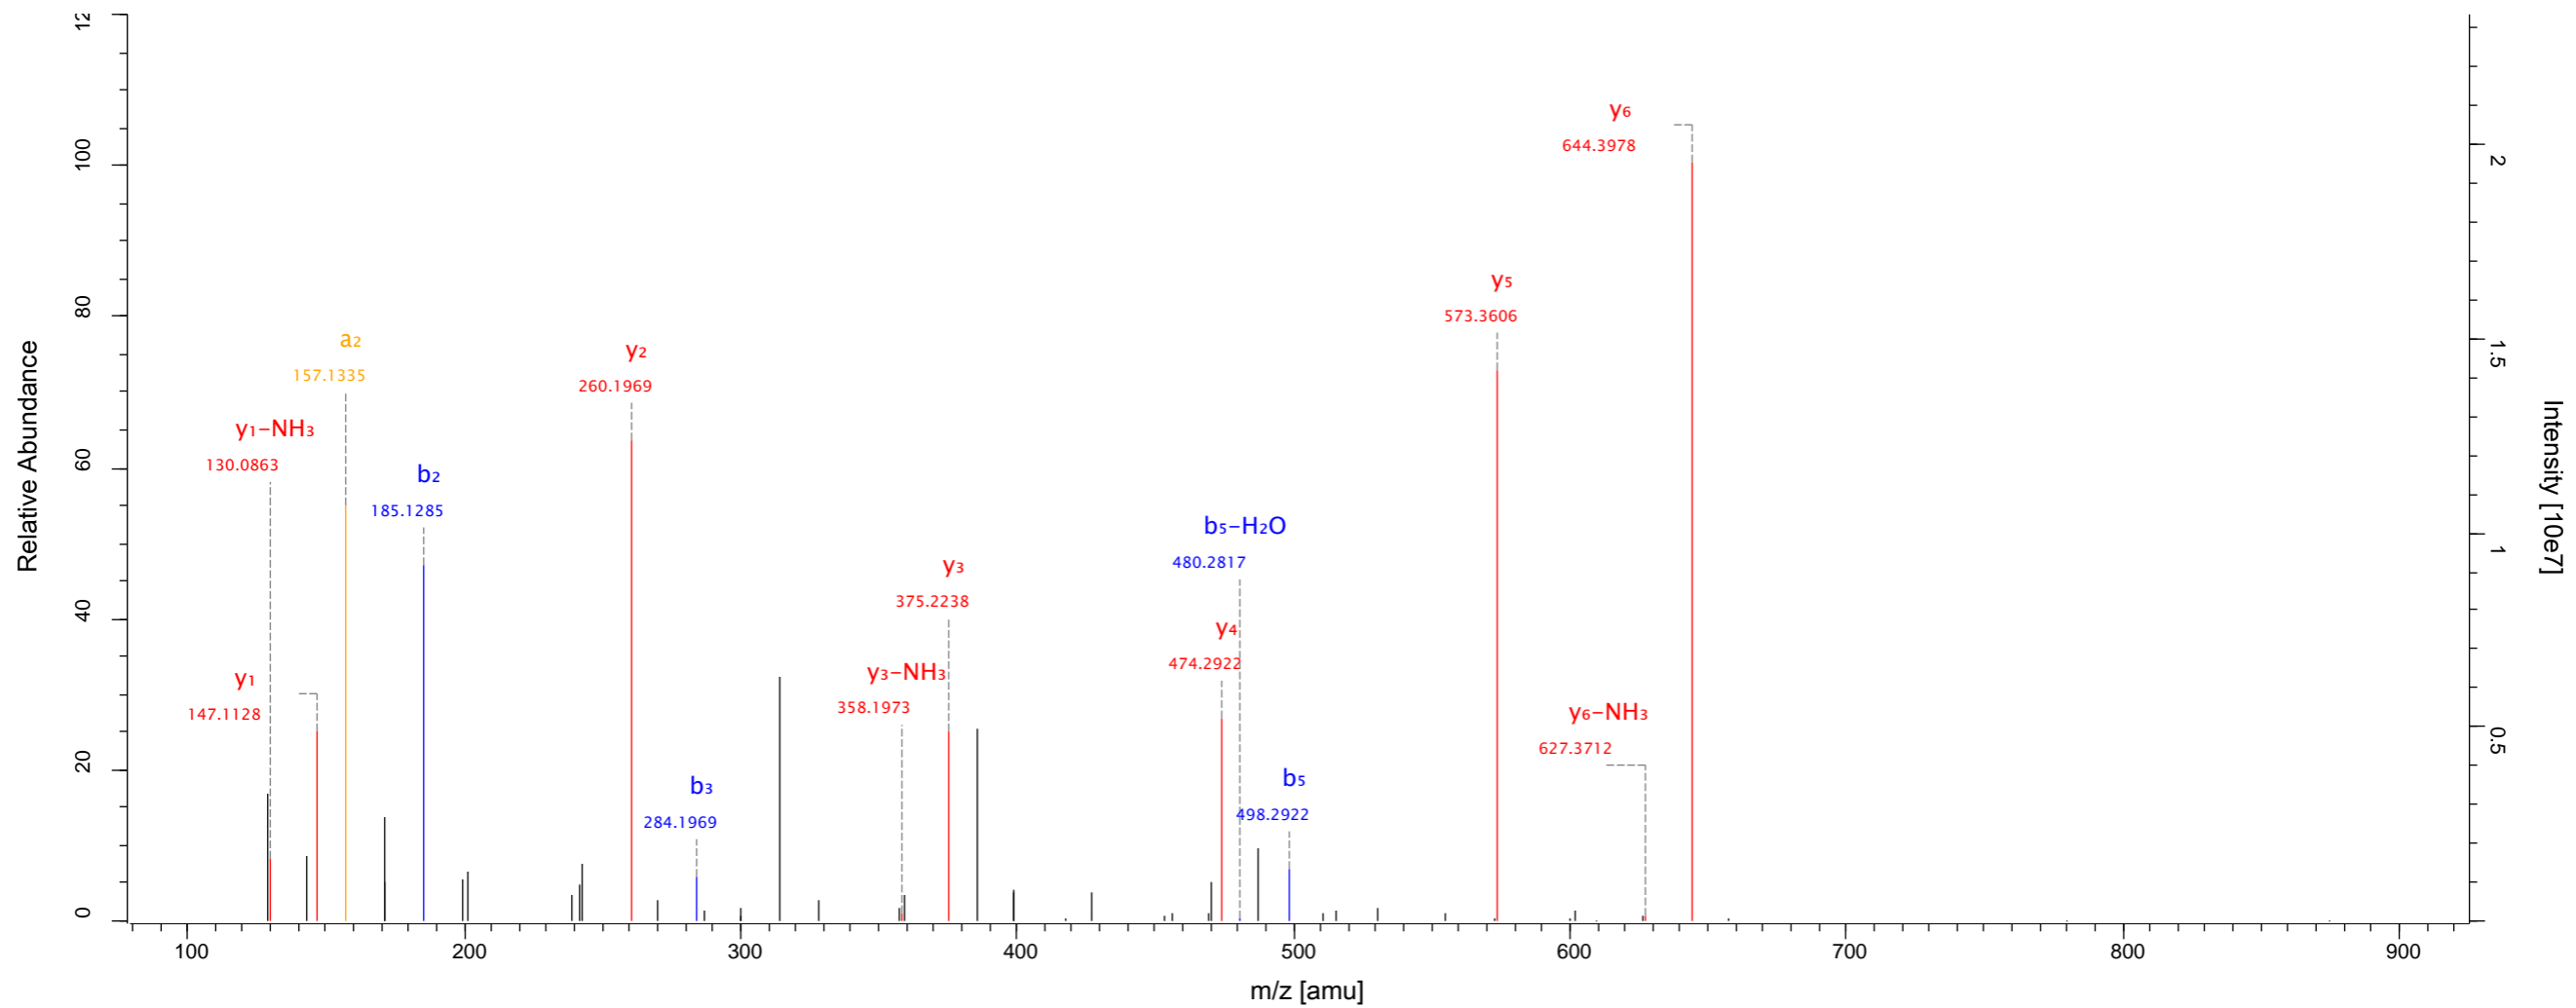

Raw file: 20111212\_EXQ5\_AnMi\_QC\_HCMVp1\_27  
Scan number: 20020  
Protein: ORFL119C - NC\_006273.2[63363,63800]- <unknown description>  
Peptide score: 111.61  
Method: FTMS; HCD

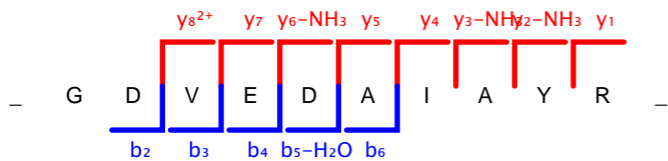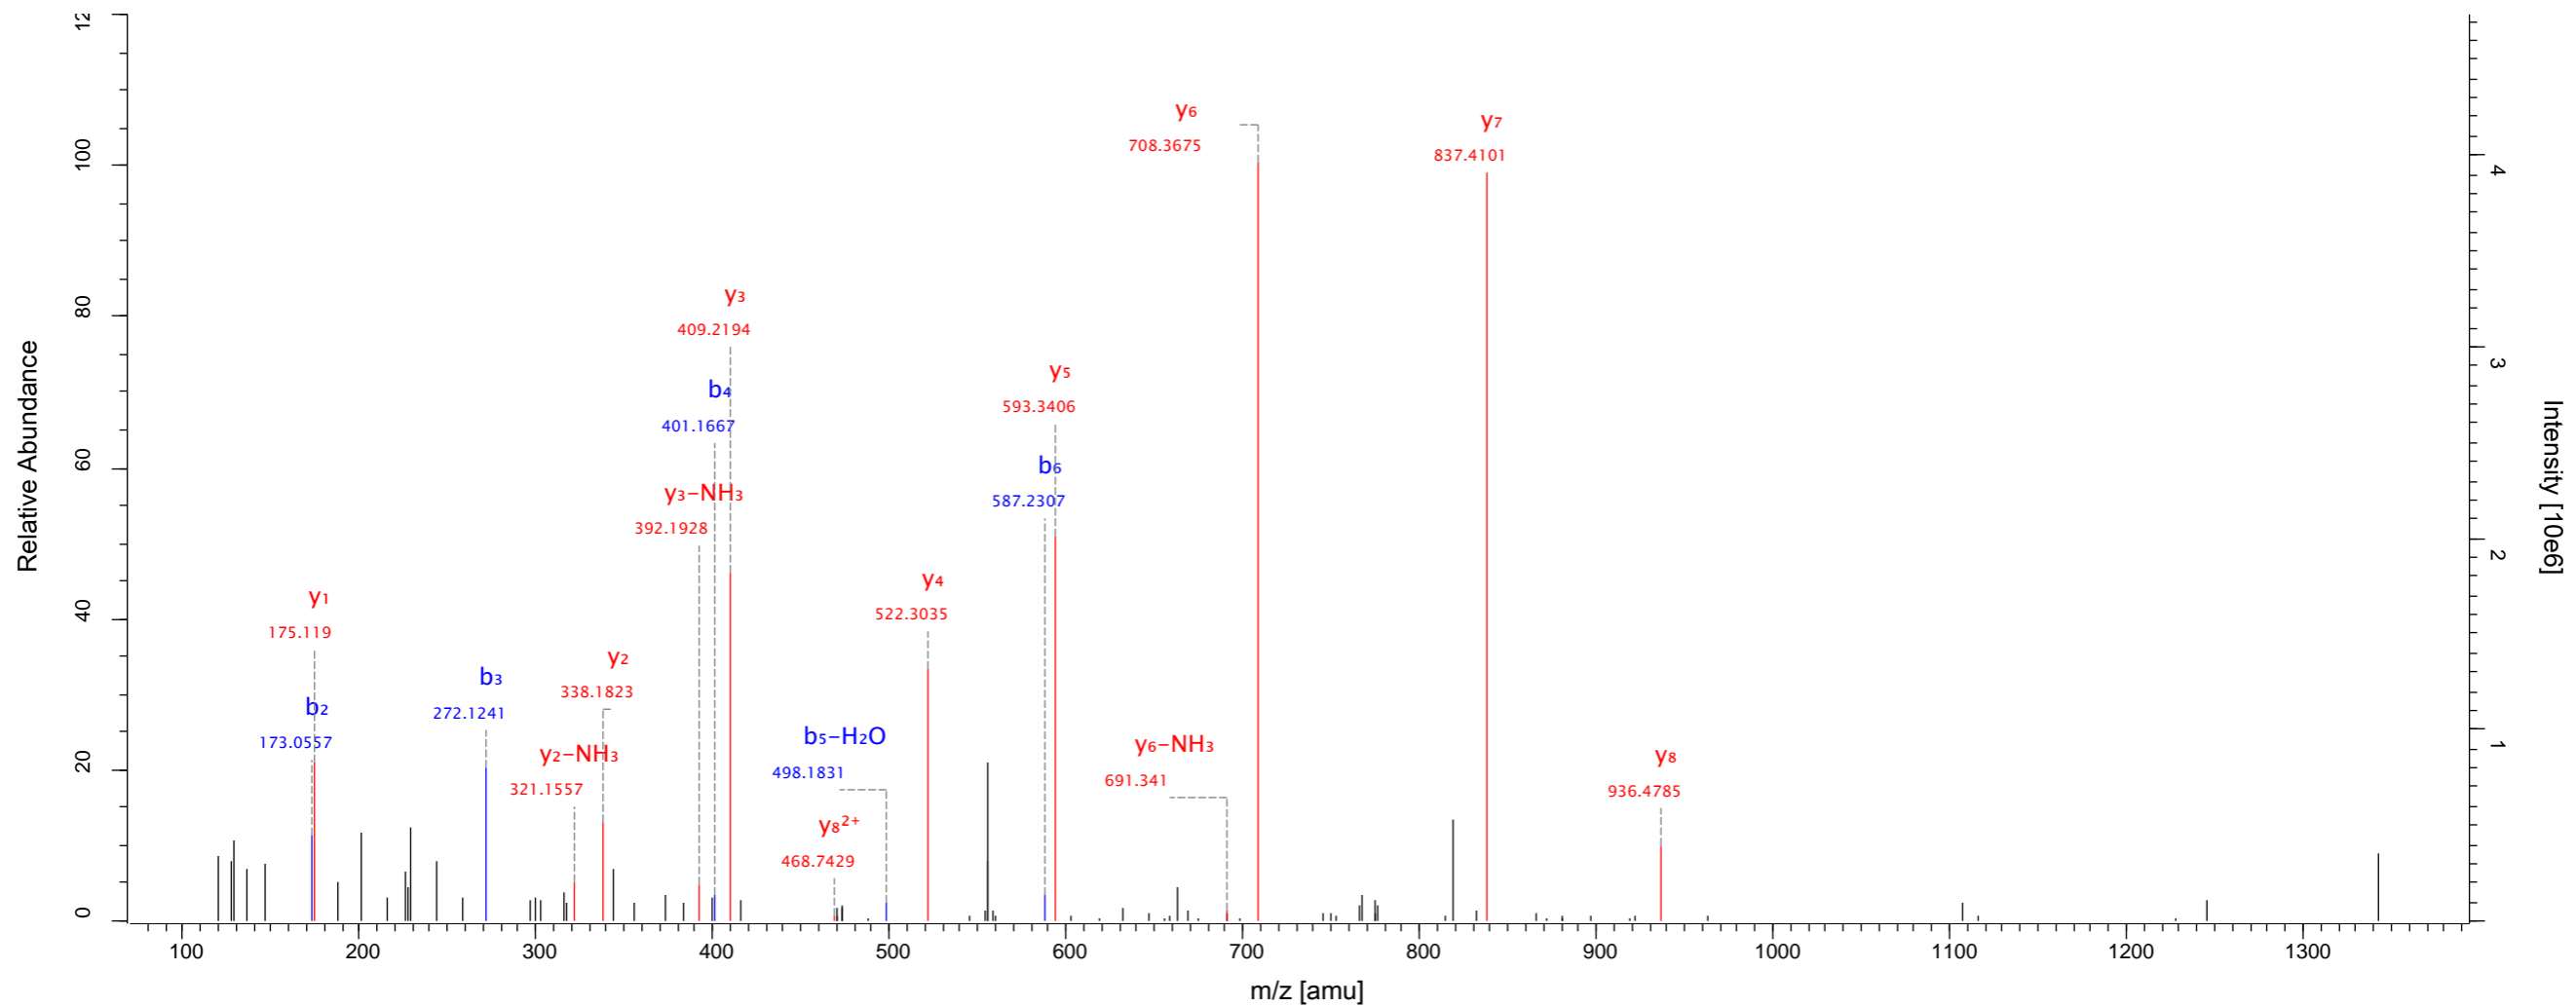

Raw file: 20111212\_EXQ5\_AnMi\_QC\_HCMVp1\_27  
 Scan number: 22703  
 Protein: ORFL142W + NC\_006273.2[78726,79031]+ <unknown description>  
 Peptide score: 125.23  
 Method: FTMS; HCD

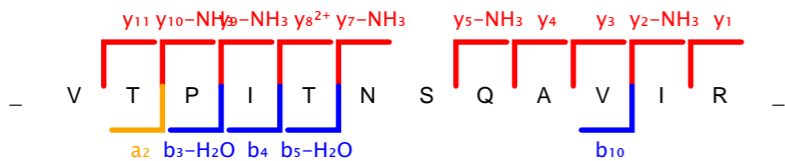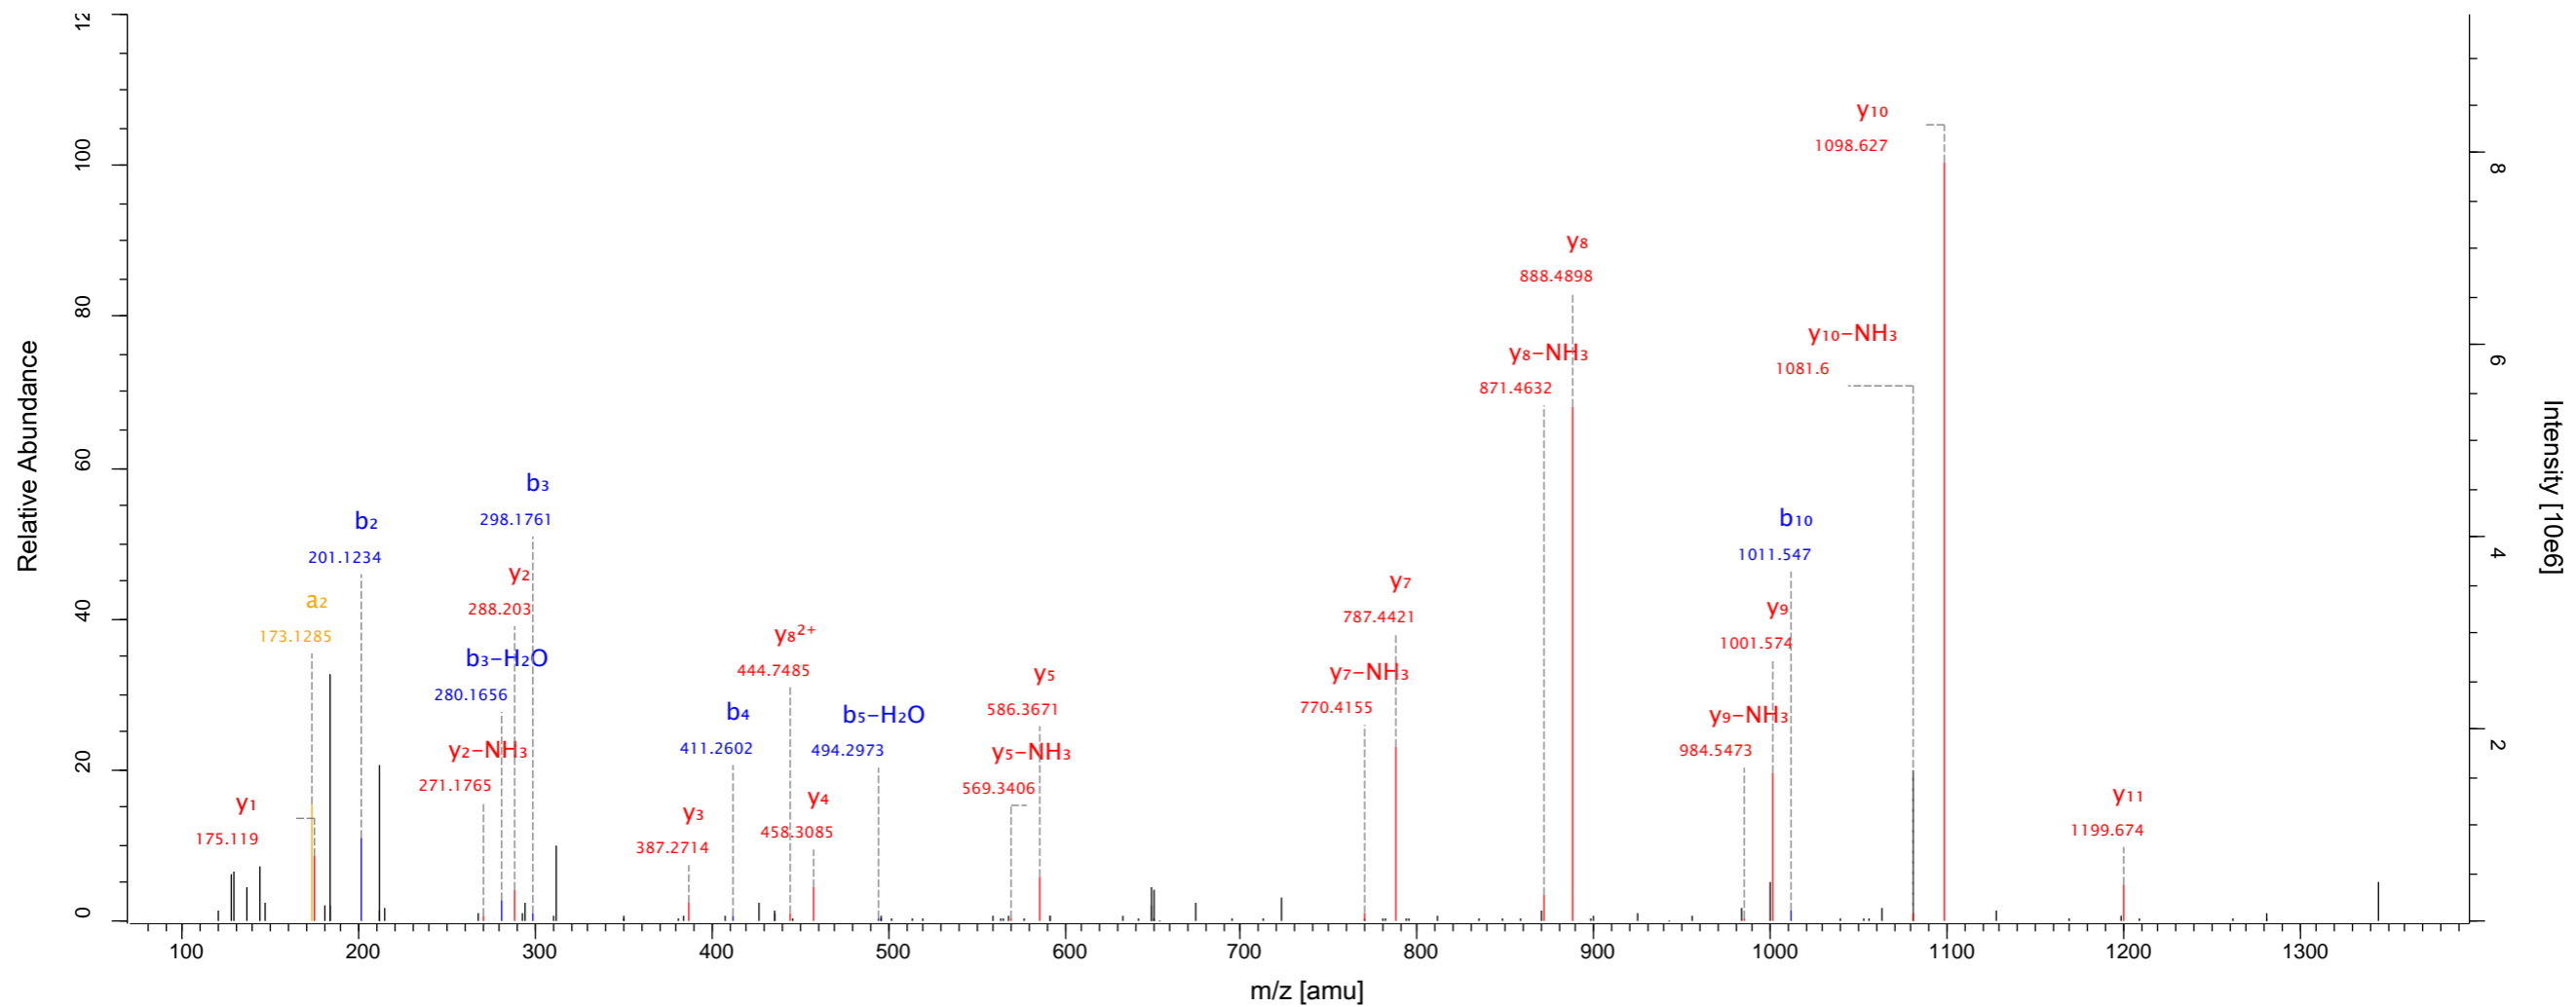

Raw file: 20111212\_EXQ5\_AnMi\_QC\_HCMVp1\_27  
Scan number: 22902  
Protein: ORFL119C - NC\_006273.2[63363,63800]- <unknown description>  
Peptide score: 233.42  
Method: FTMS; HCD

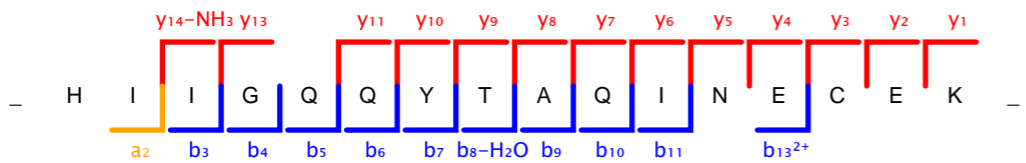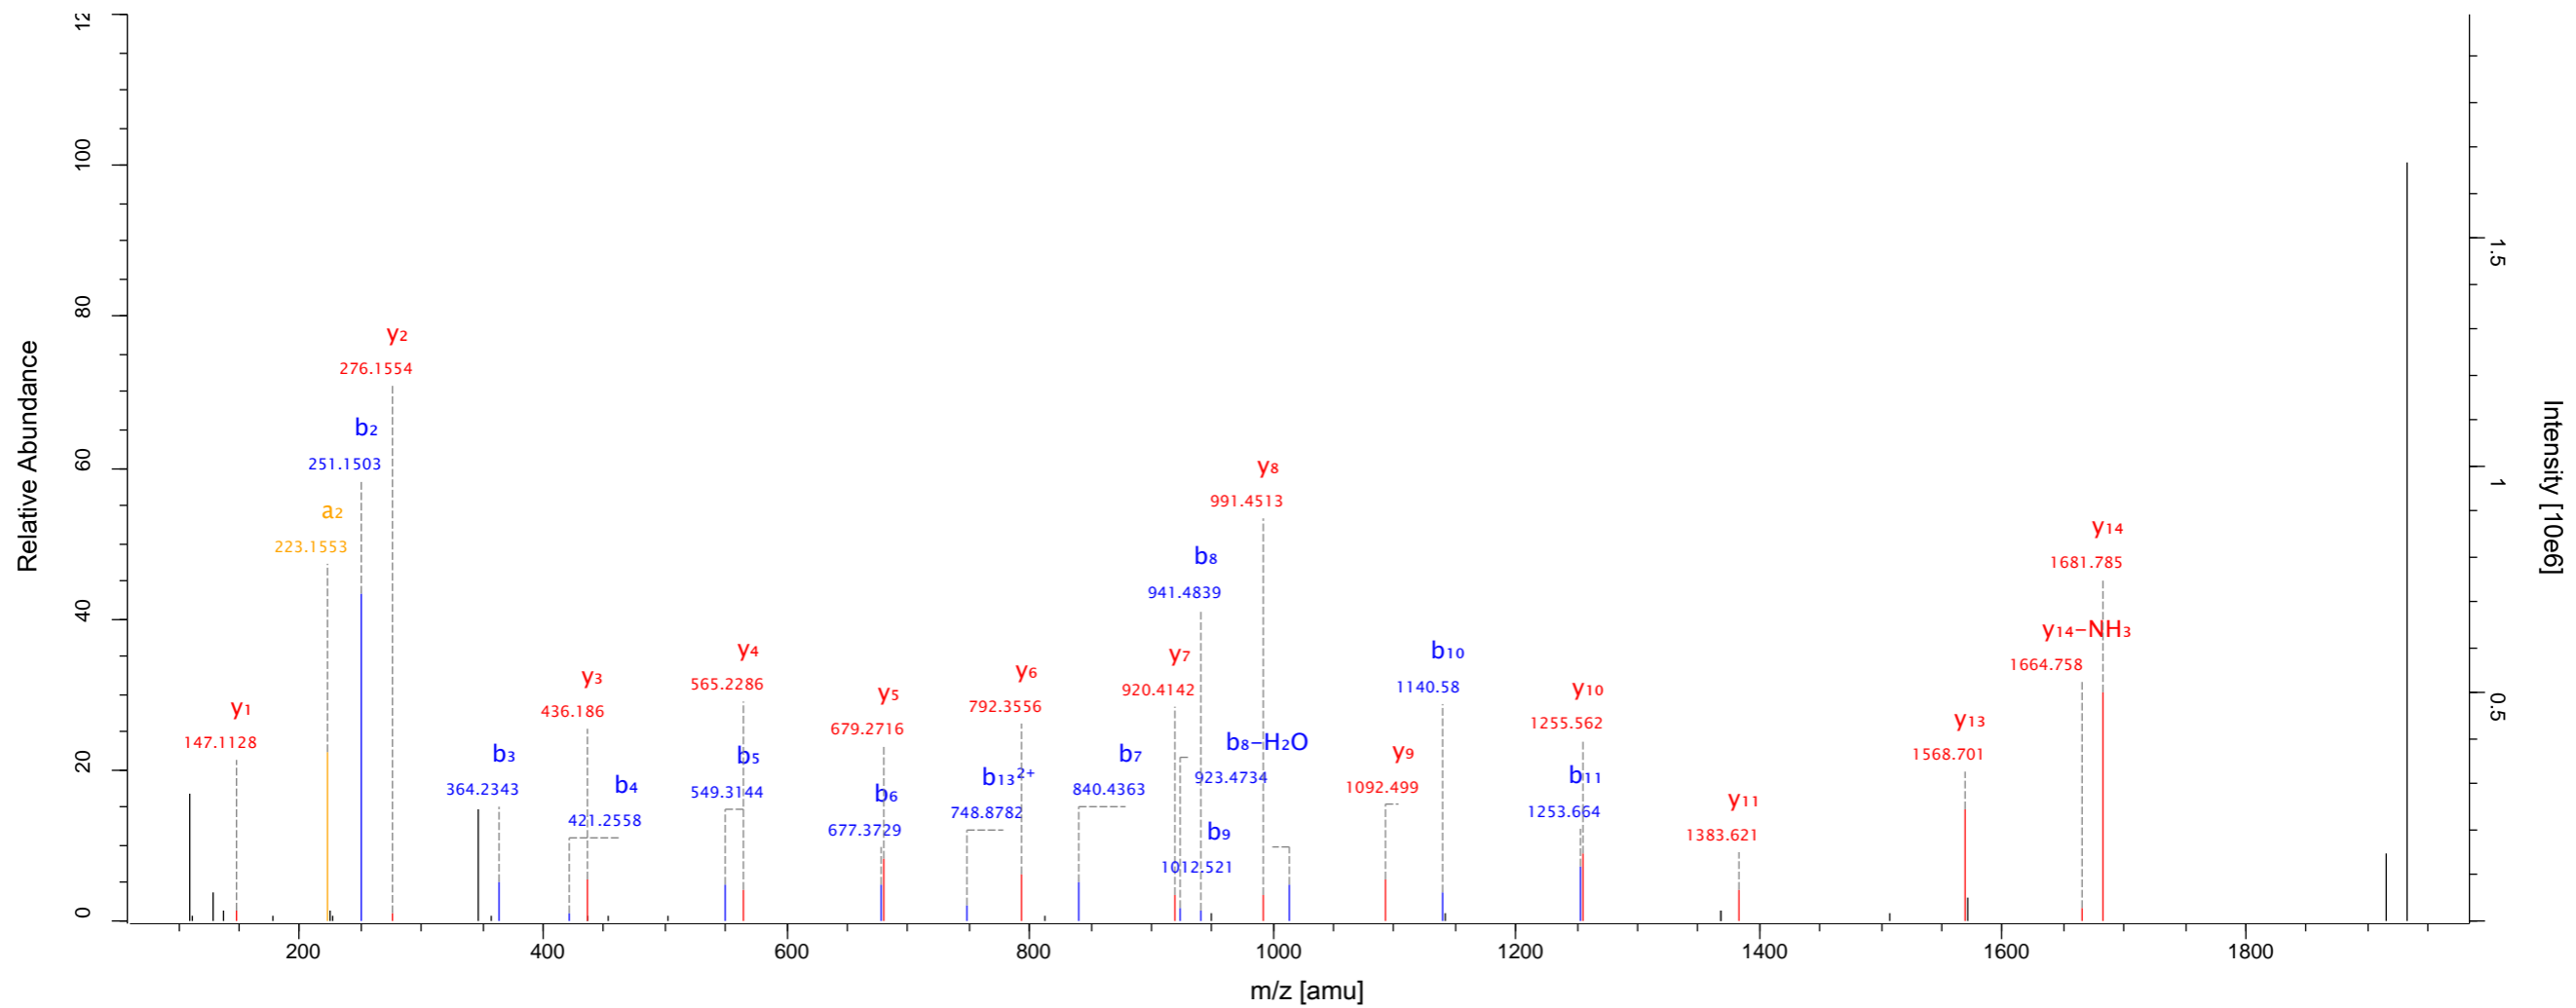

Raw file: 20111212\_EXQ5\_AnMi\_QC\_HCMVp11\_27  
Scan number: 24869  
Protein: ORFL224C.iORF1 - NC\_006273.2[134354,134734]- <unknown description>  
Peptide score: 126.62  
Method: FTMS; HCD

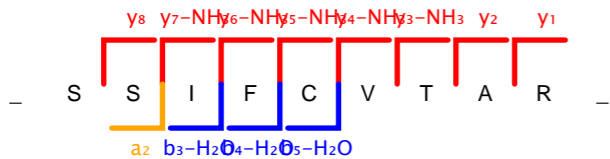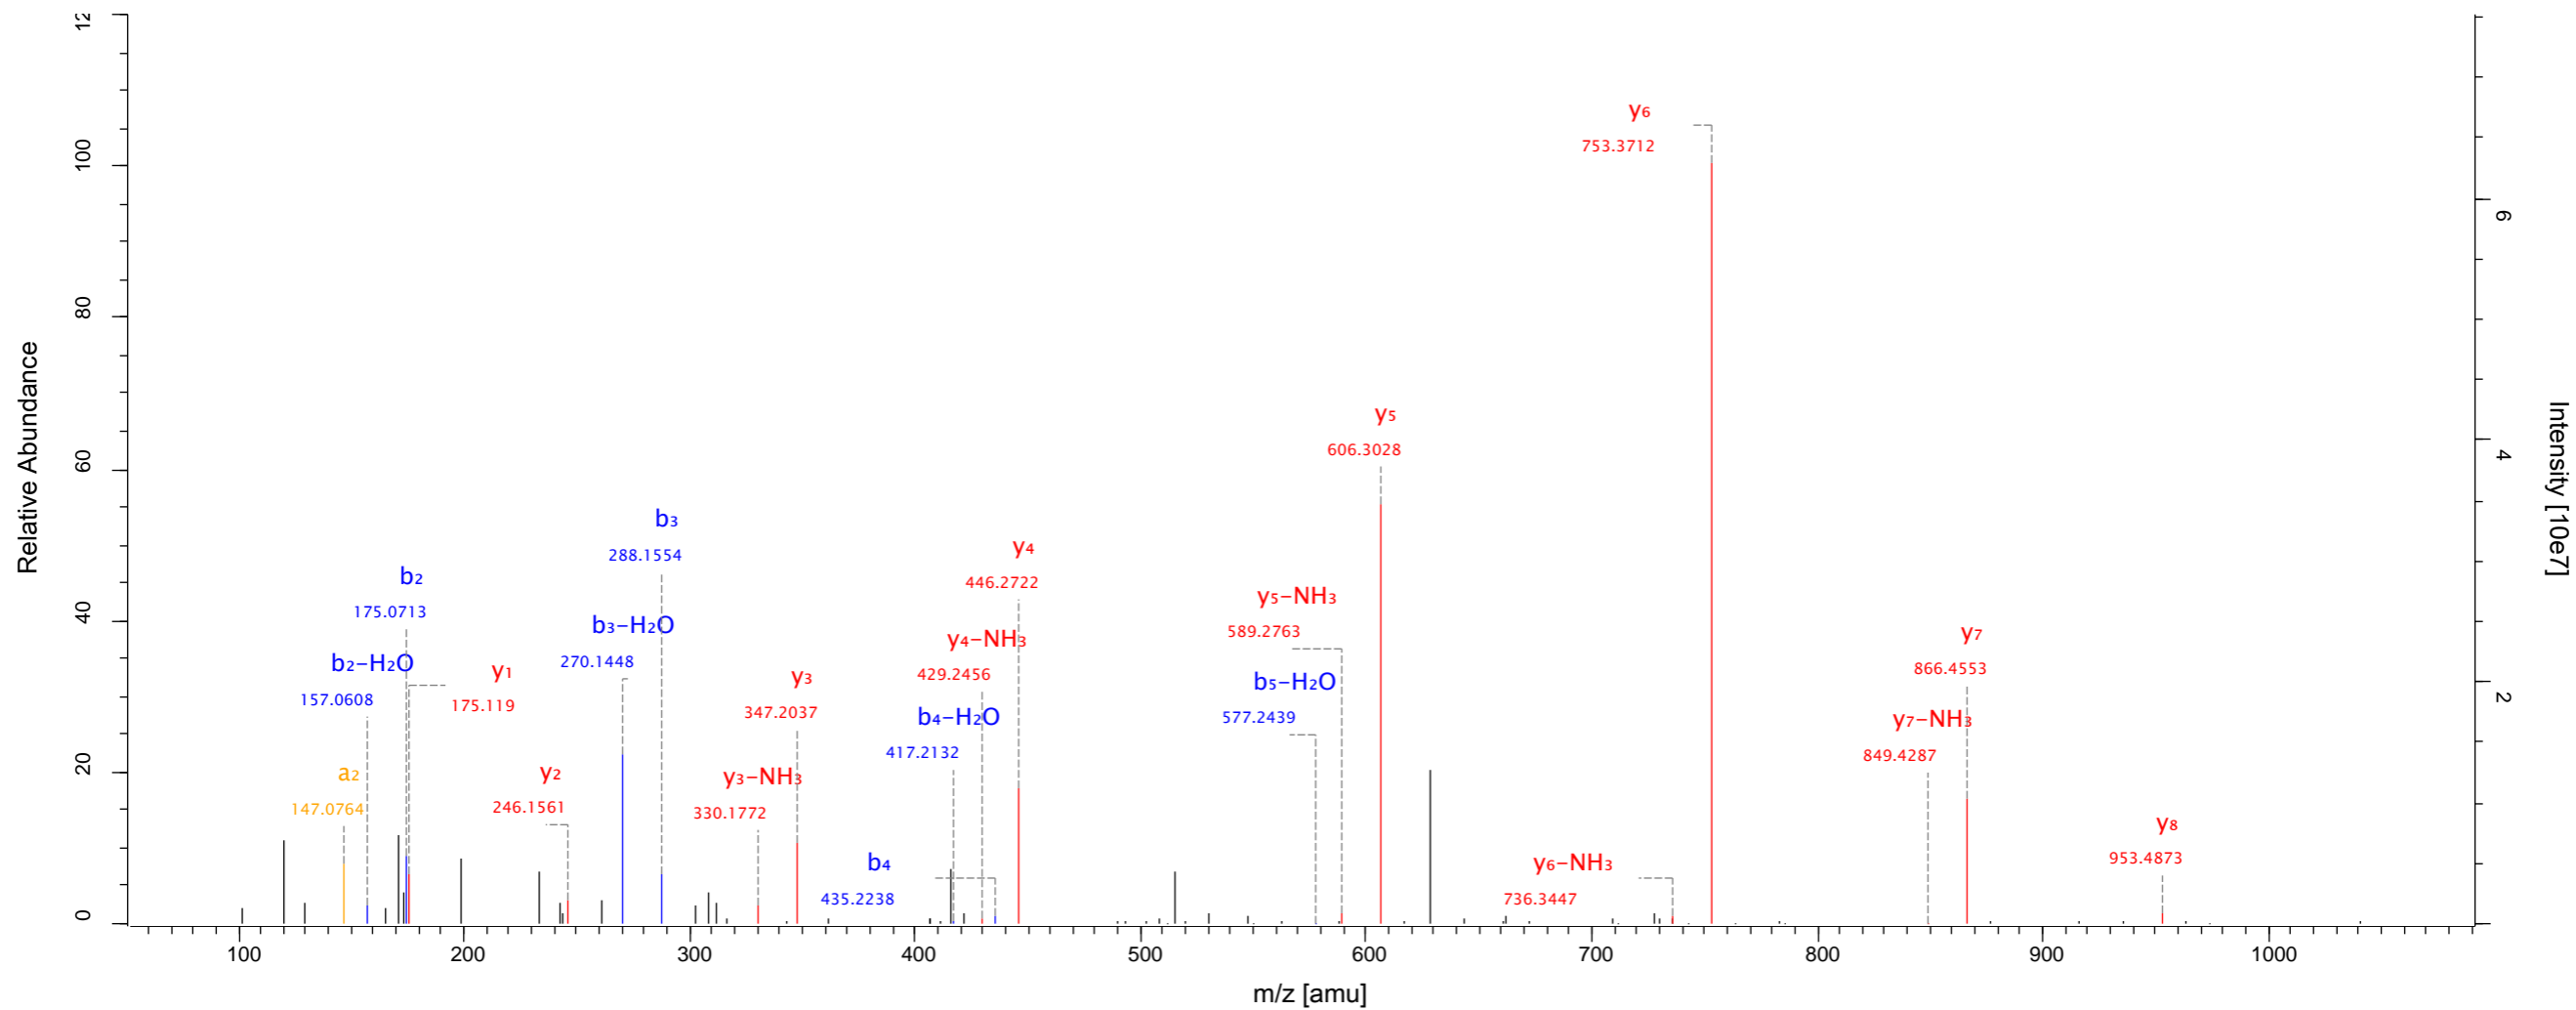

Raw file: 20111212\_EXQ5\_AnMi\_QC\_HCMVp1\_27  
 Scan number: 25343  
 Protein: ORFL174C.iORF2 - NC\_006273.2[106396,106770]- <unknown description>  
 Peptide score: 128.31  
 Method: FTMS; HCD

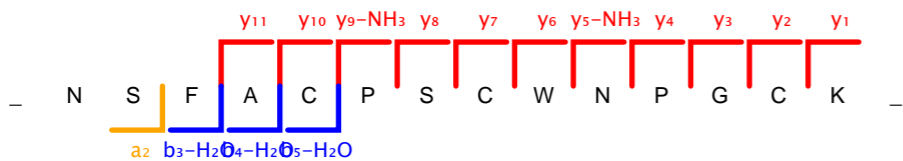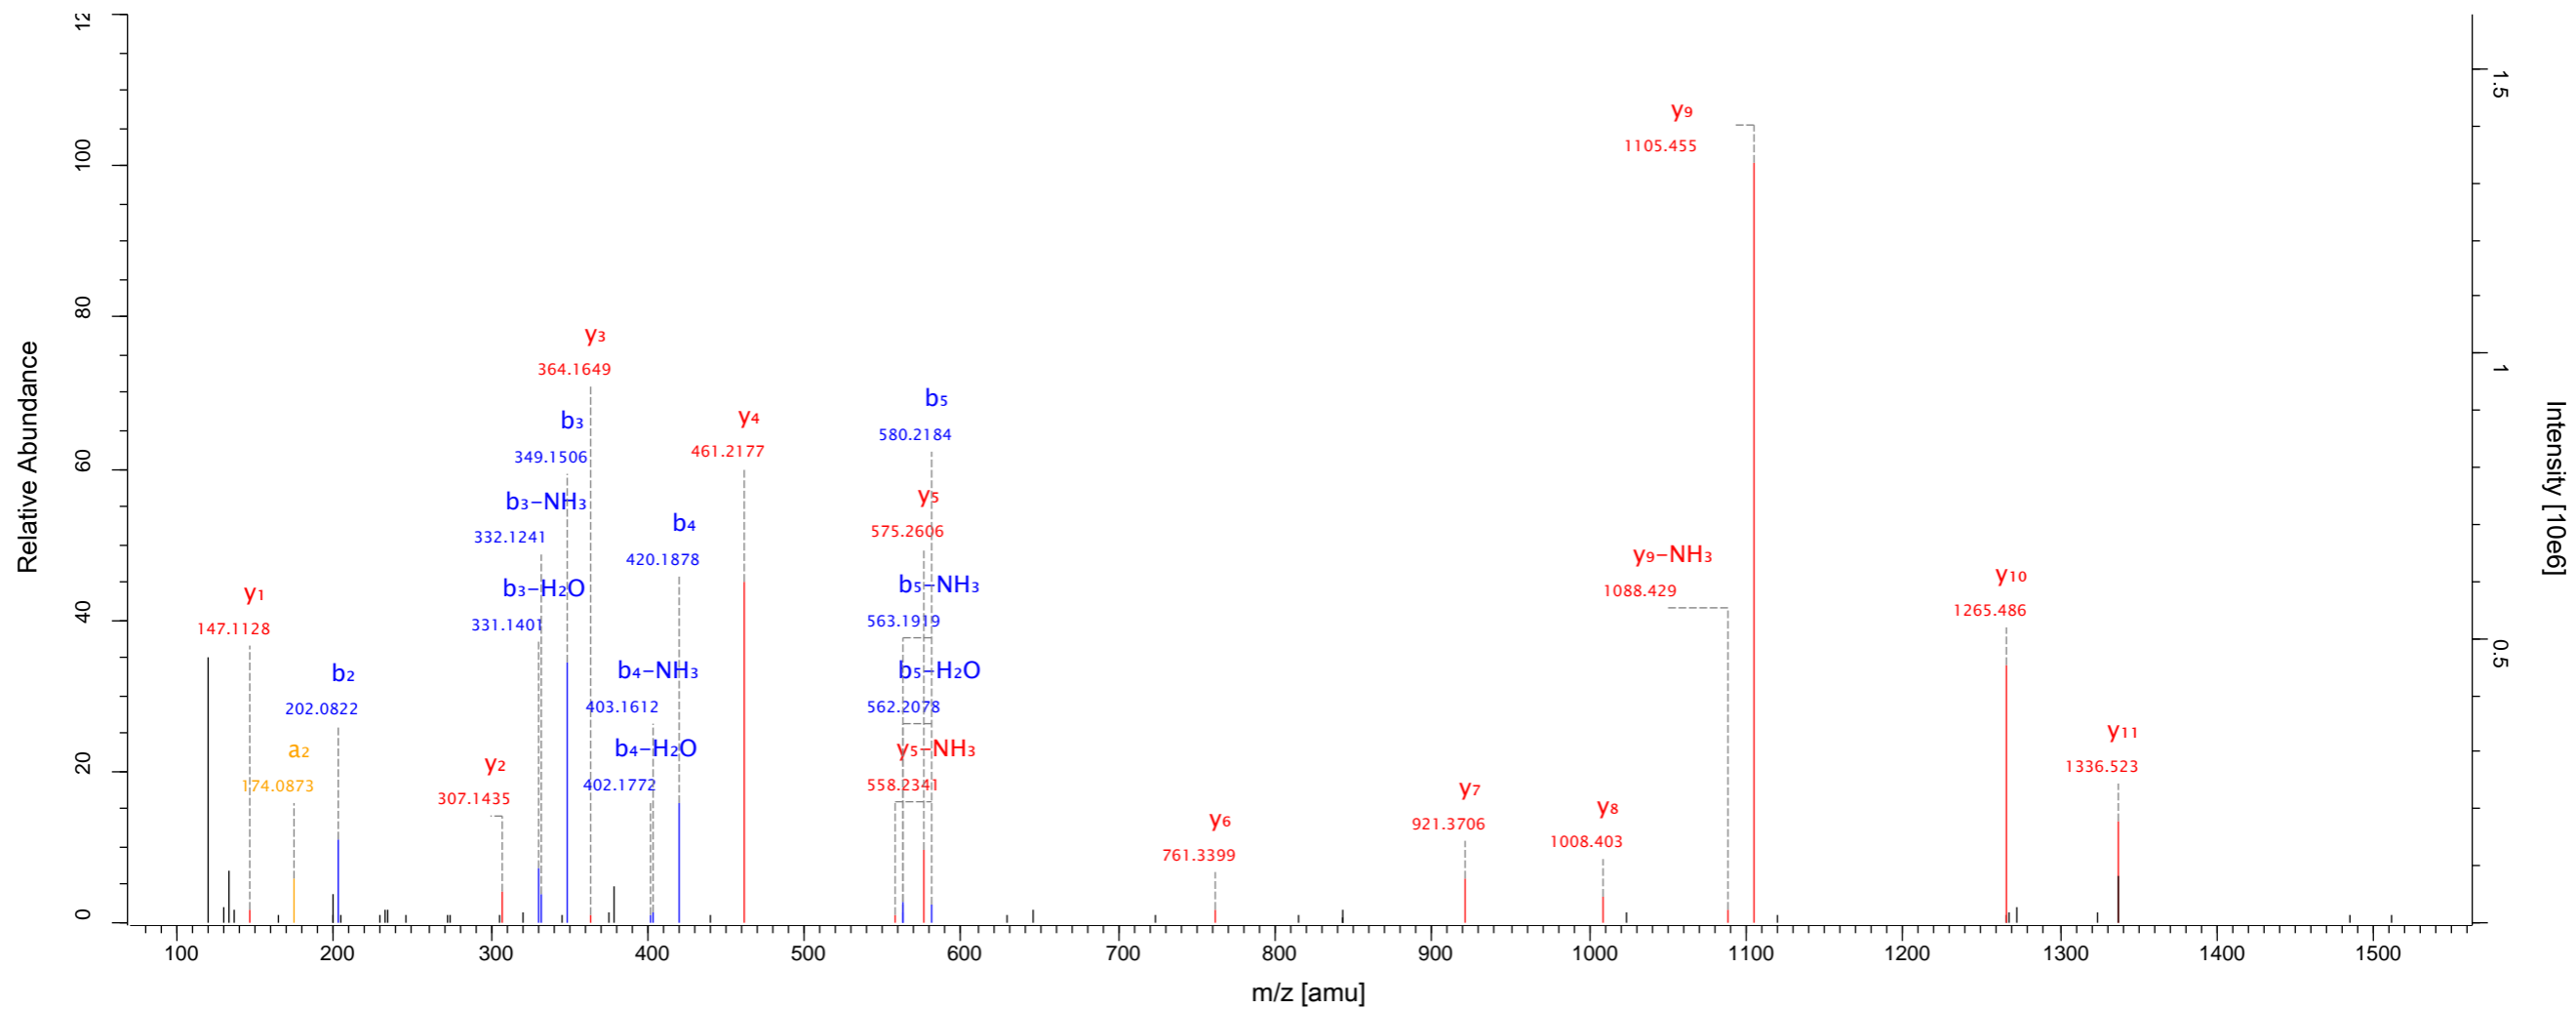



Raw file: 20111212\_EXQ5\_AnMi\_QC\_HCMVp11\_27  
Scan number: 25887  
Protein: ORFL234C - NC\_006273.2[148754,149149]- <unknown description>  
Peptide score: 125.81  
Method: FTMS; HCD

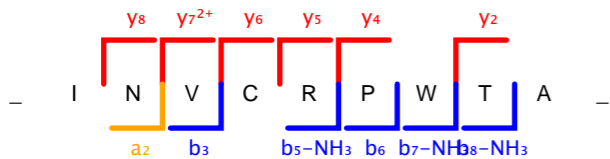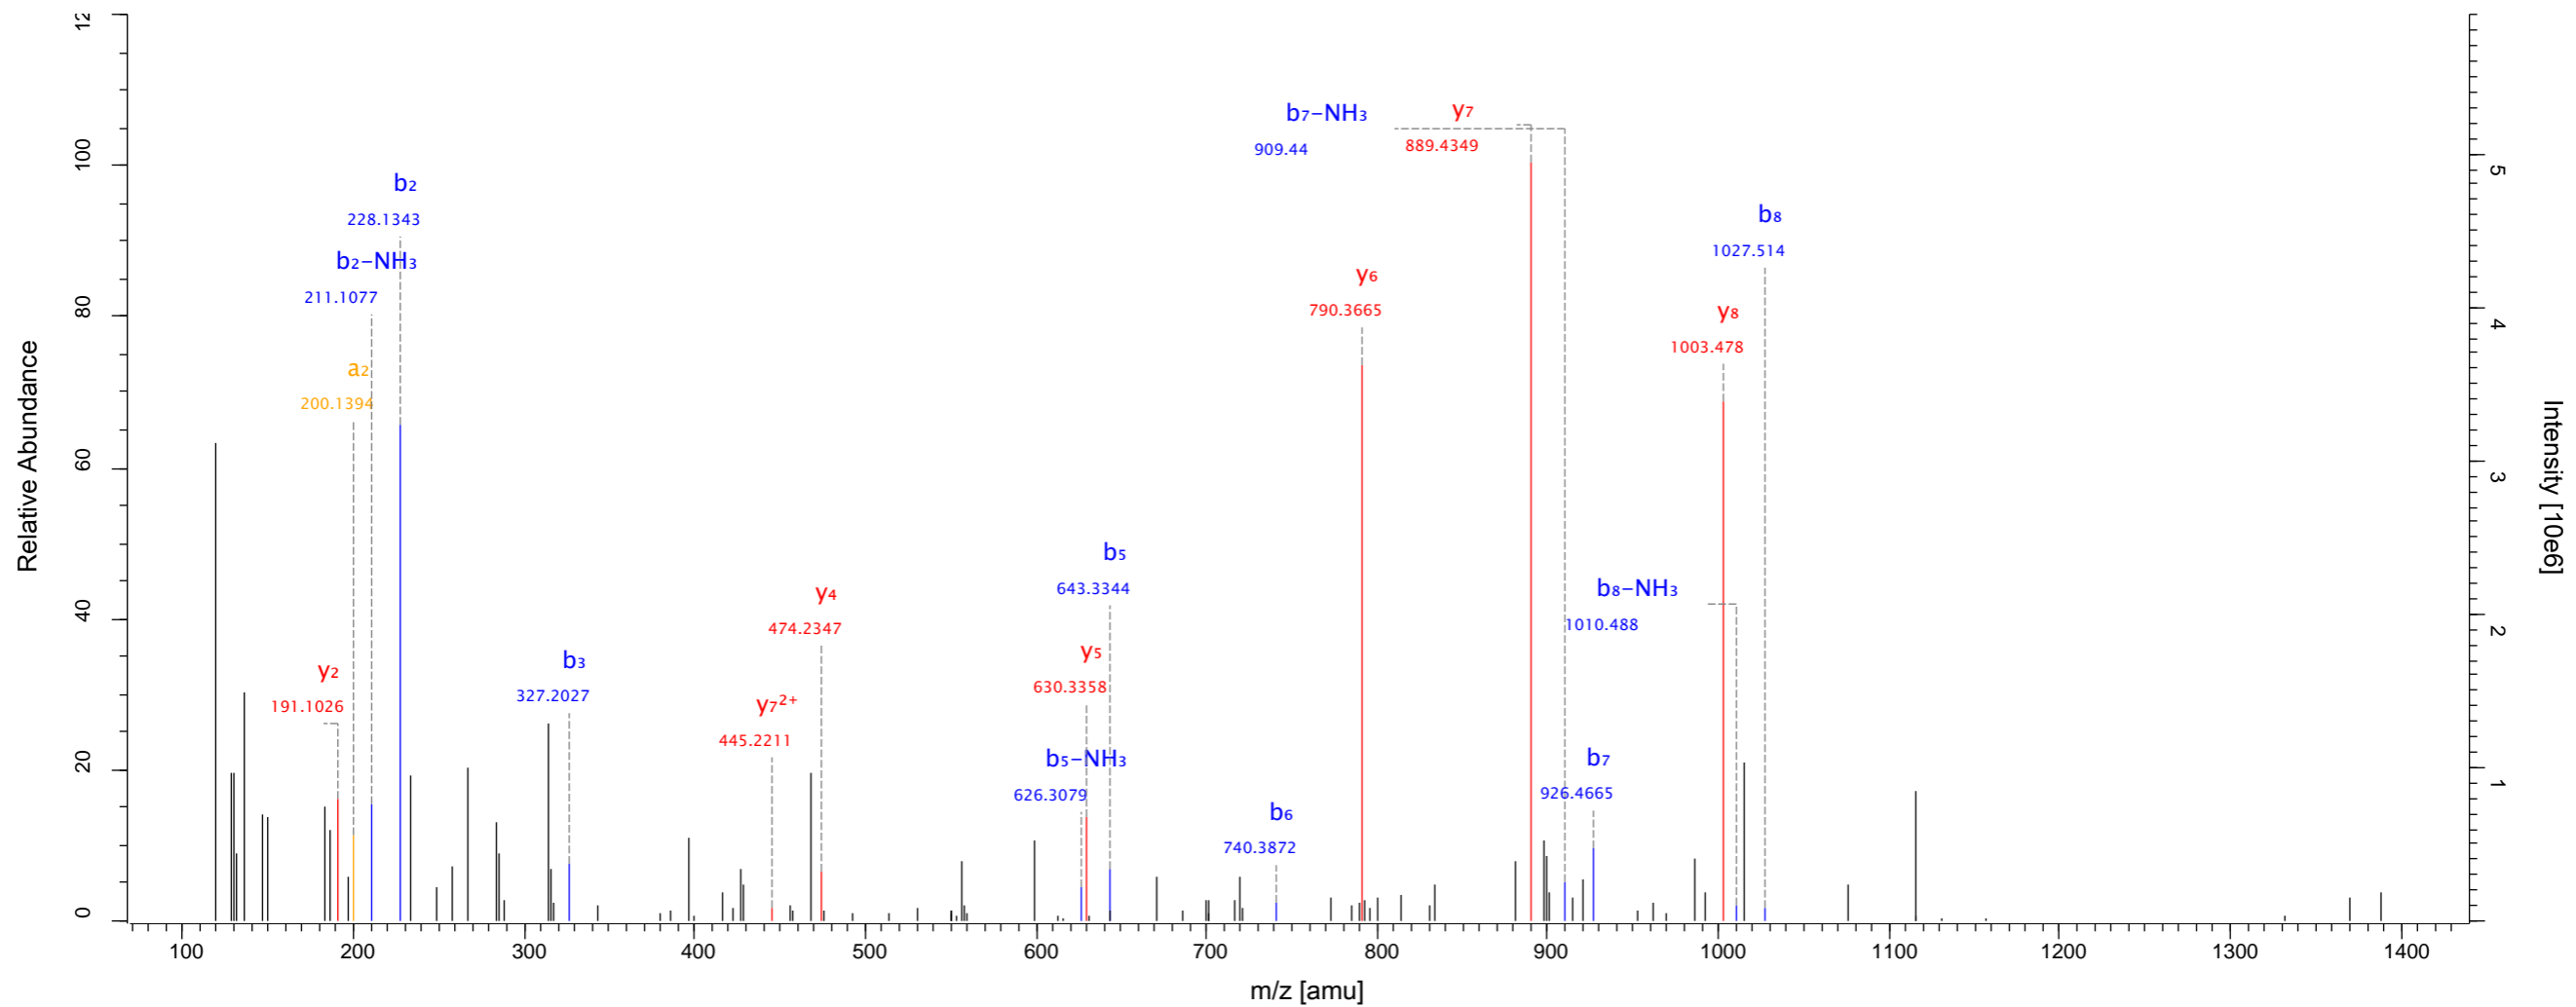

Raw file: 20111212\_EXQ5\_AnMi\_QC\_HCMVp1\_27  
Scan number: 26027  
Protein: ORFL224C.iORF1 - NC\_006273.2[134354,134734]- <unknown description>  
Peptide score: 100.07  
Method: FTMS; HCD

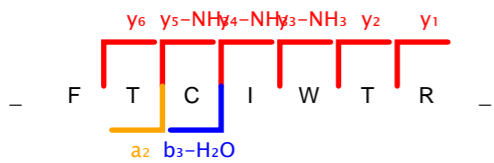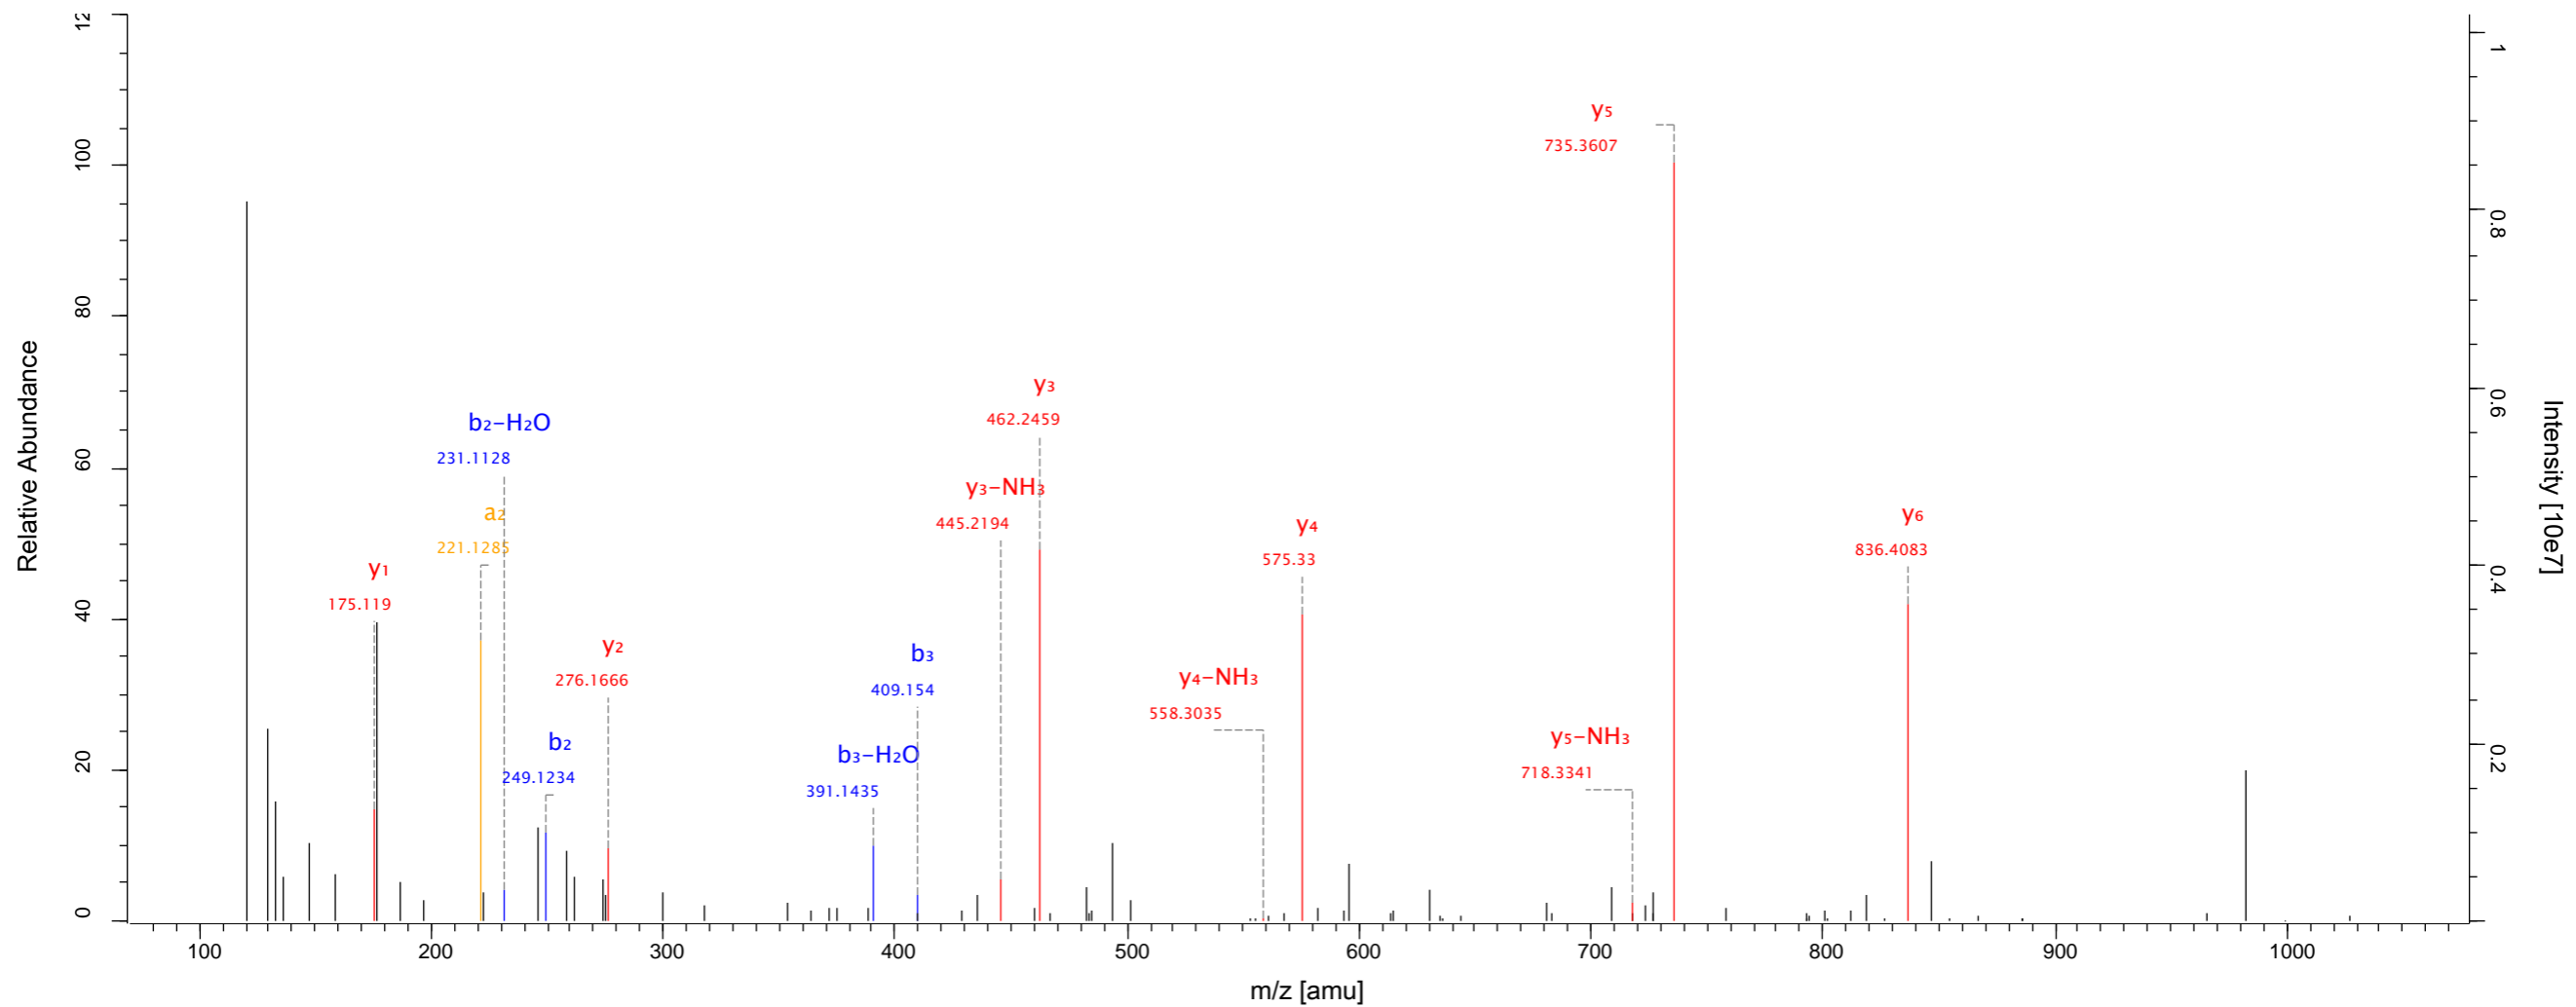

Raw file: 20111212\_EXQ5\_AnMi\_QC\_HCMVp11\_27  
Scan number: 27227  
Protein: ORFL47W.iORF1 + NC\_006273.2[21305,21601]+ <unknown description>  
Peptide score: 71.35  
Method: FTMS; HCD

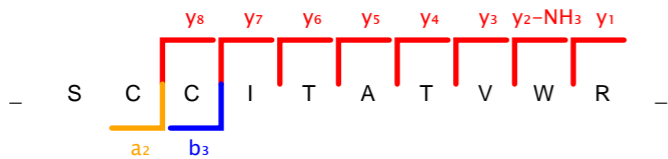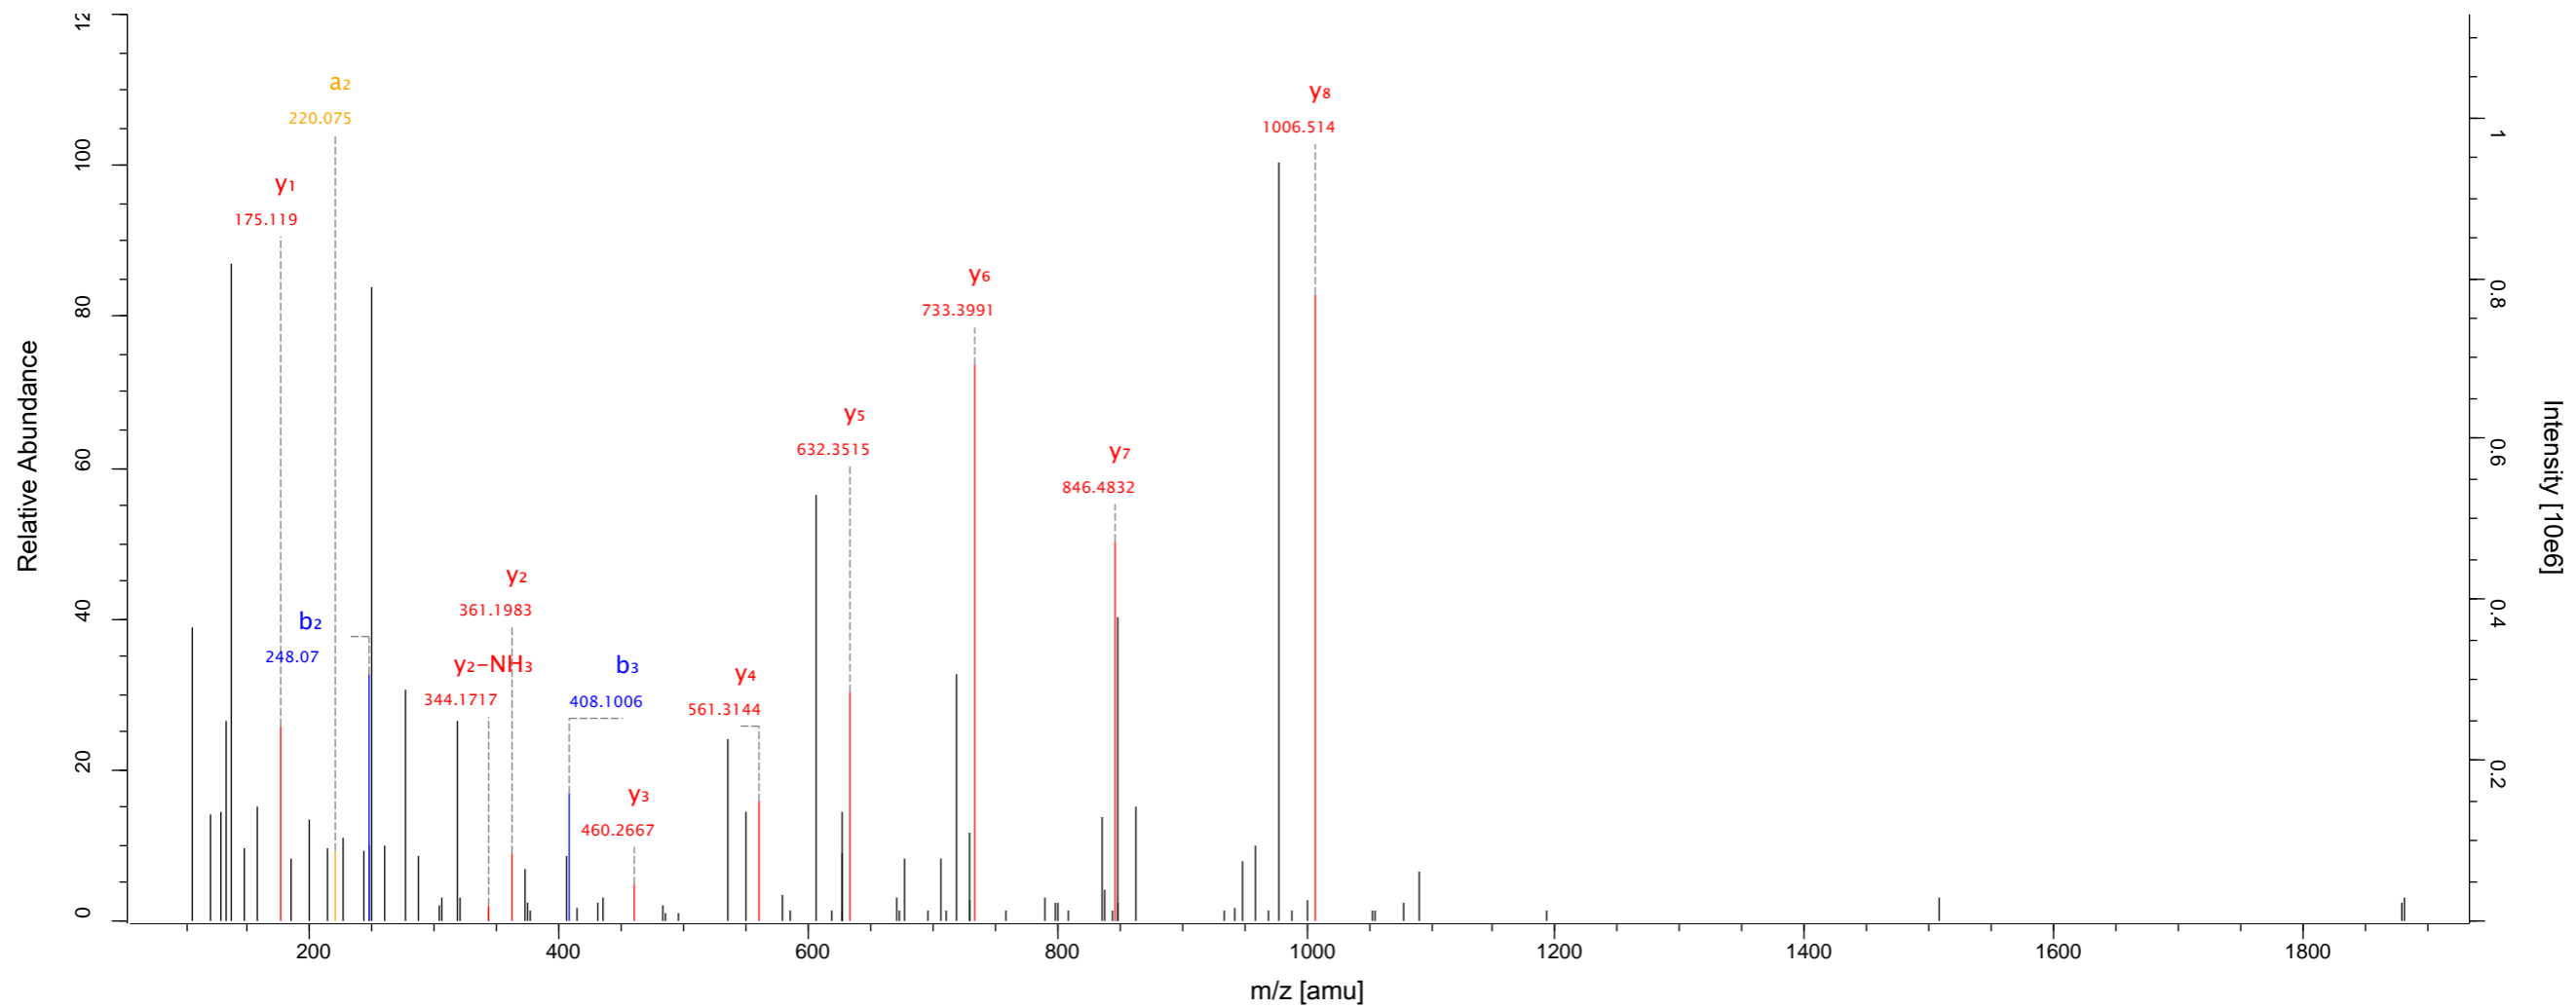

Raw file: 20111212\_EXQ5\_AnMi\_QC\_HCMVp11\_27  
 Scan number: 29928  
 Protein: ORFL86W + NC\_006273.2[38059,38538]+ <unknown description>  
 Peptide score: 103.67  
 Method: FTMS; HCD

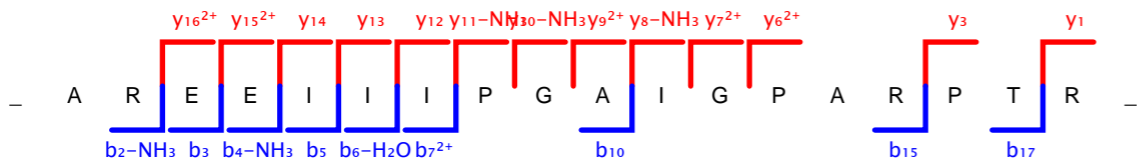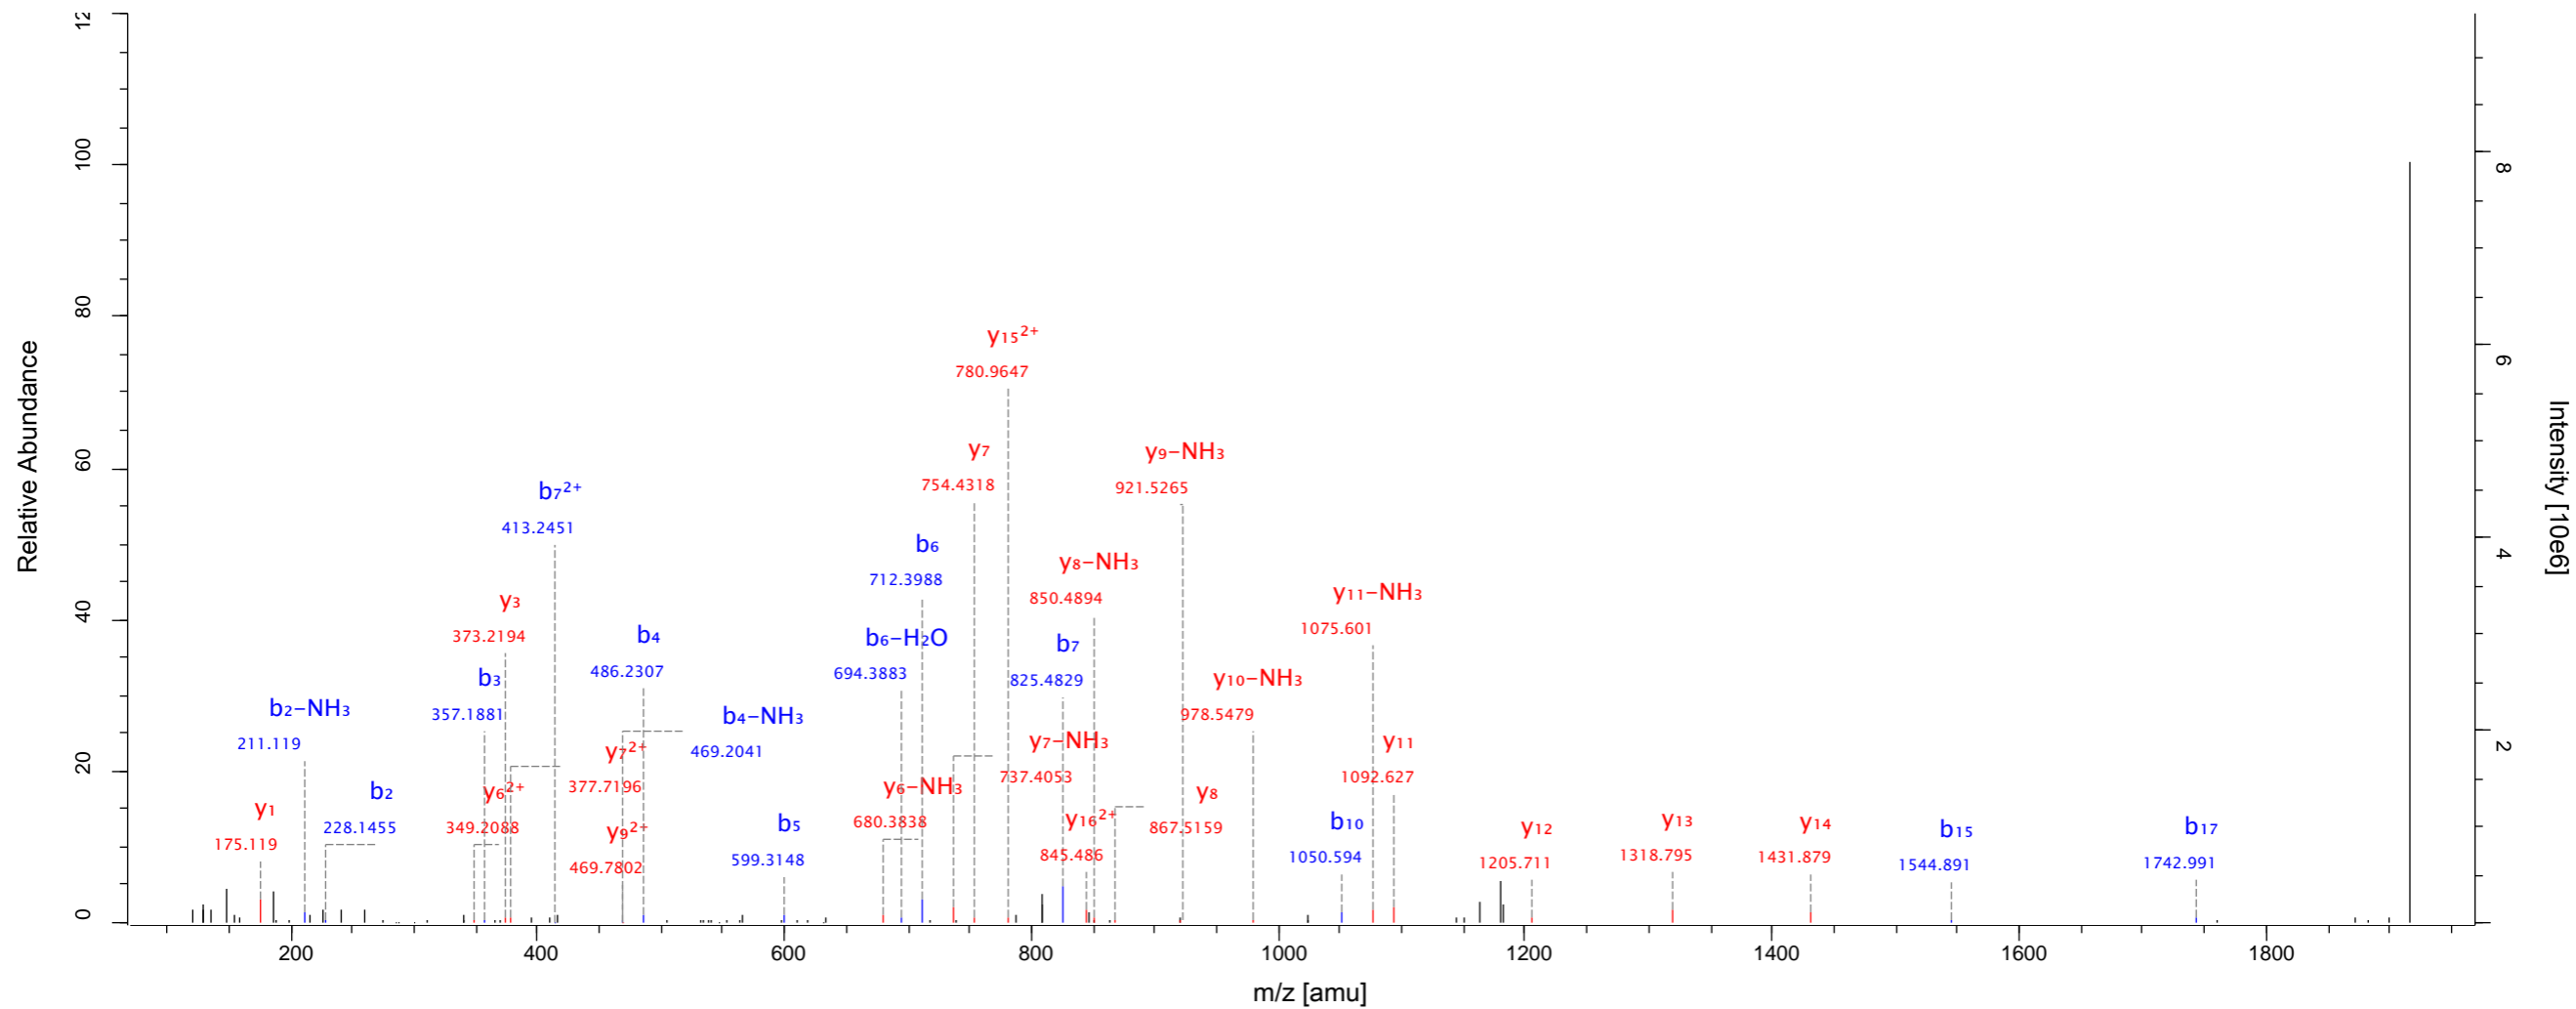

Raw file: 20111212\_EXQ5\_AnMi\_QC\_HCMVp1\_27  
 Scan number: 29980  
 Protein: ORFL237C - NC\_006273.2[149340,149699]- <unknown description>  
 Peptide score: 201.15  
 Method: FTMS; HCD

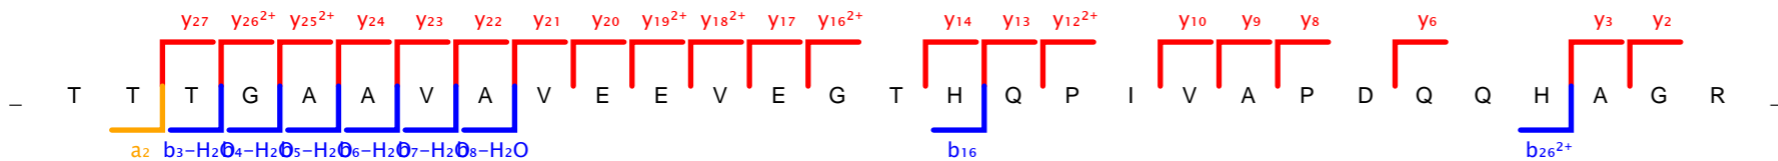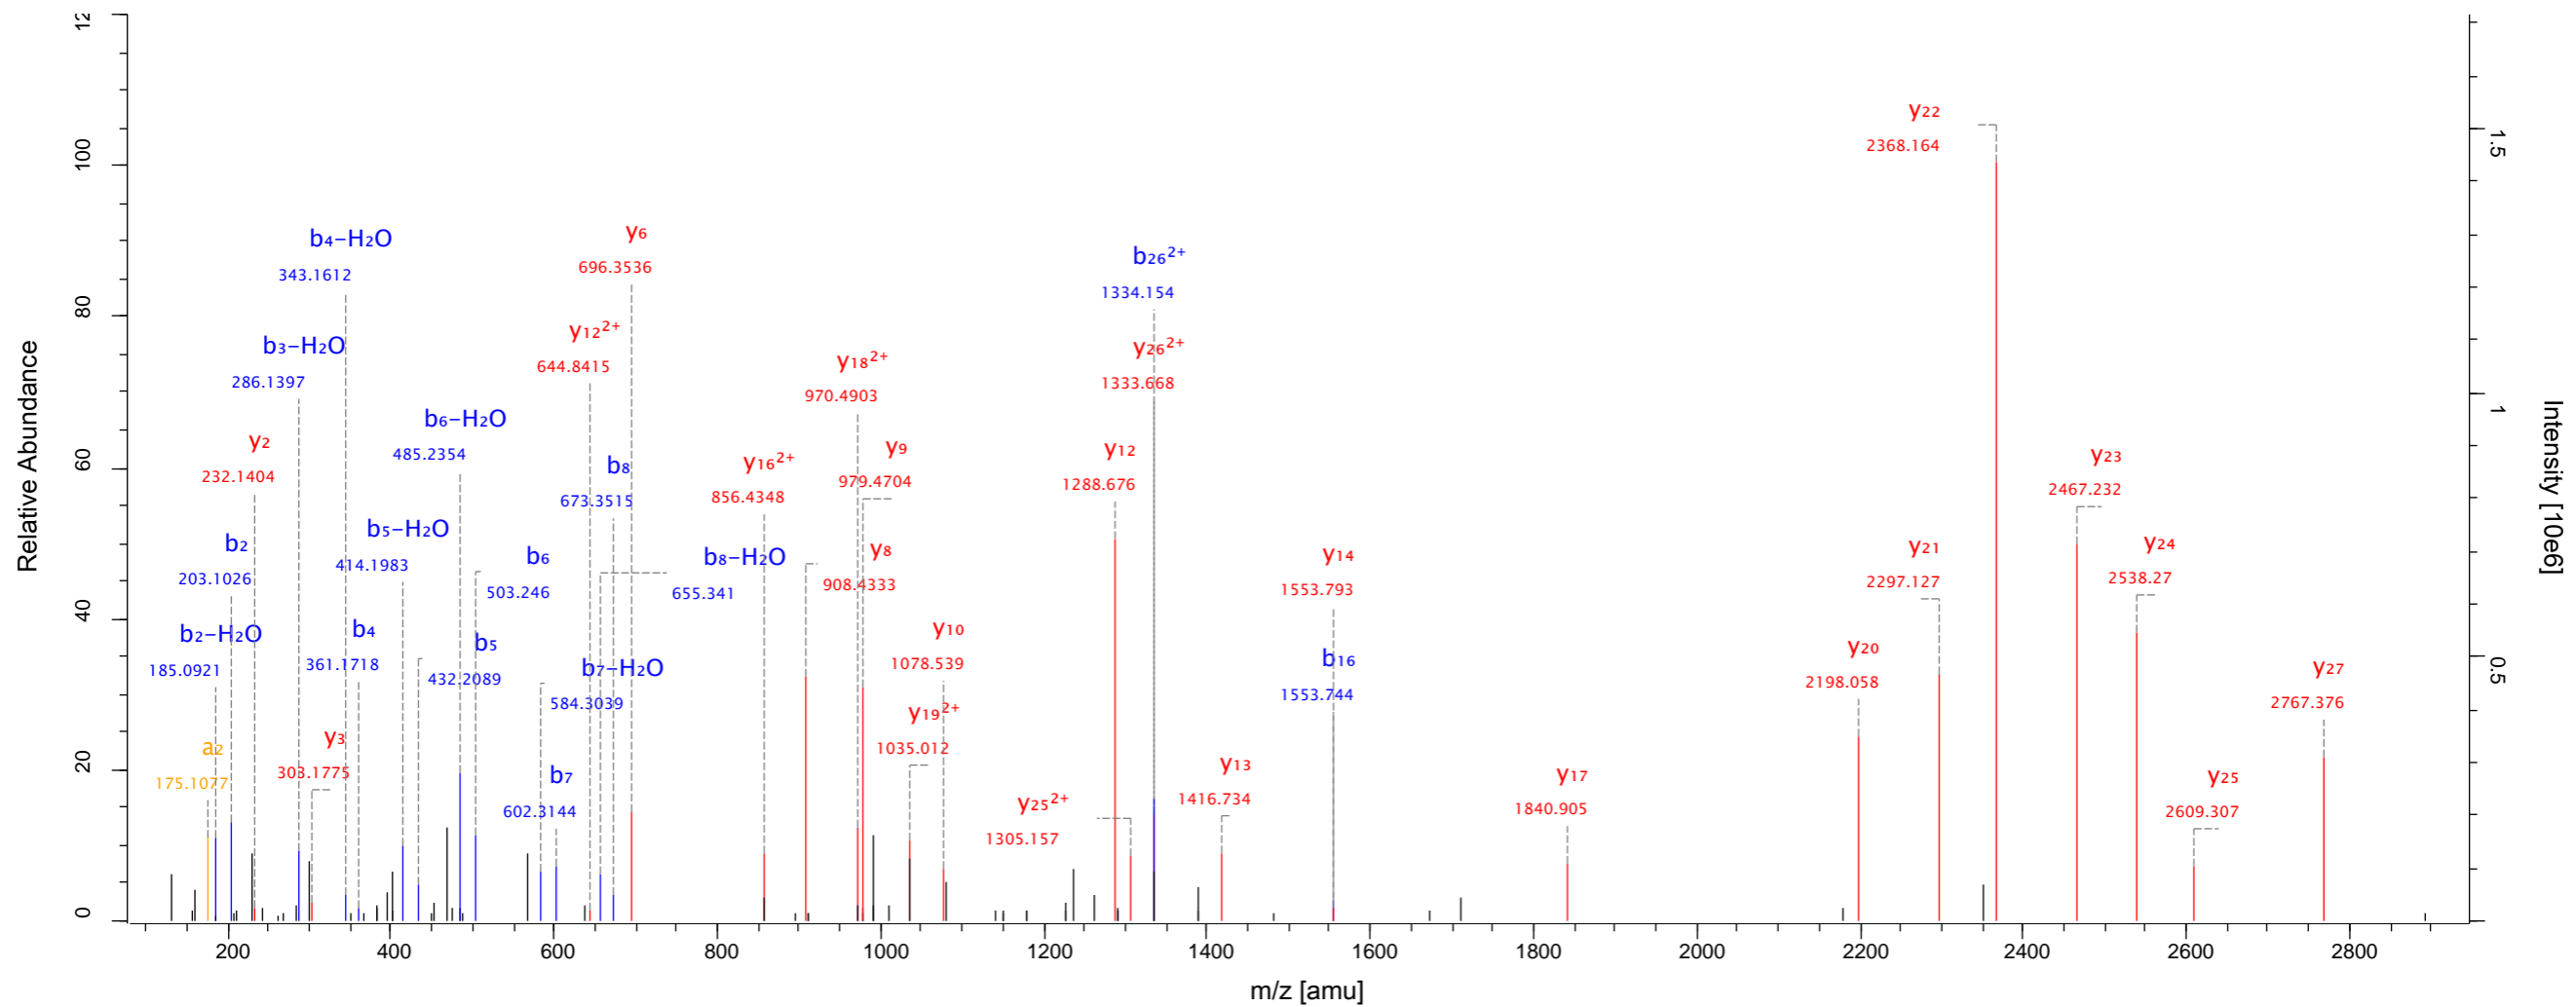

Raw file: 20111212\_EXQ5\_AnMi\_QC\_HCMVp11\_27  
Scan number: 30520  
Protein: ORFL224C.iORF1 - NC\_006273.2[134354,134734]- <unknown description>  
Peptide score: 169.19  
Method: FTMS; HCD

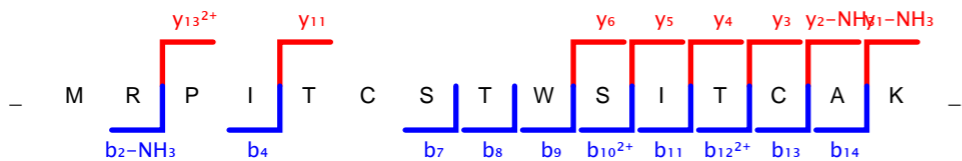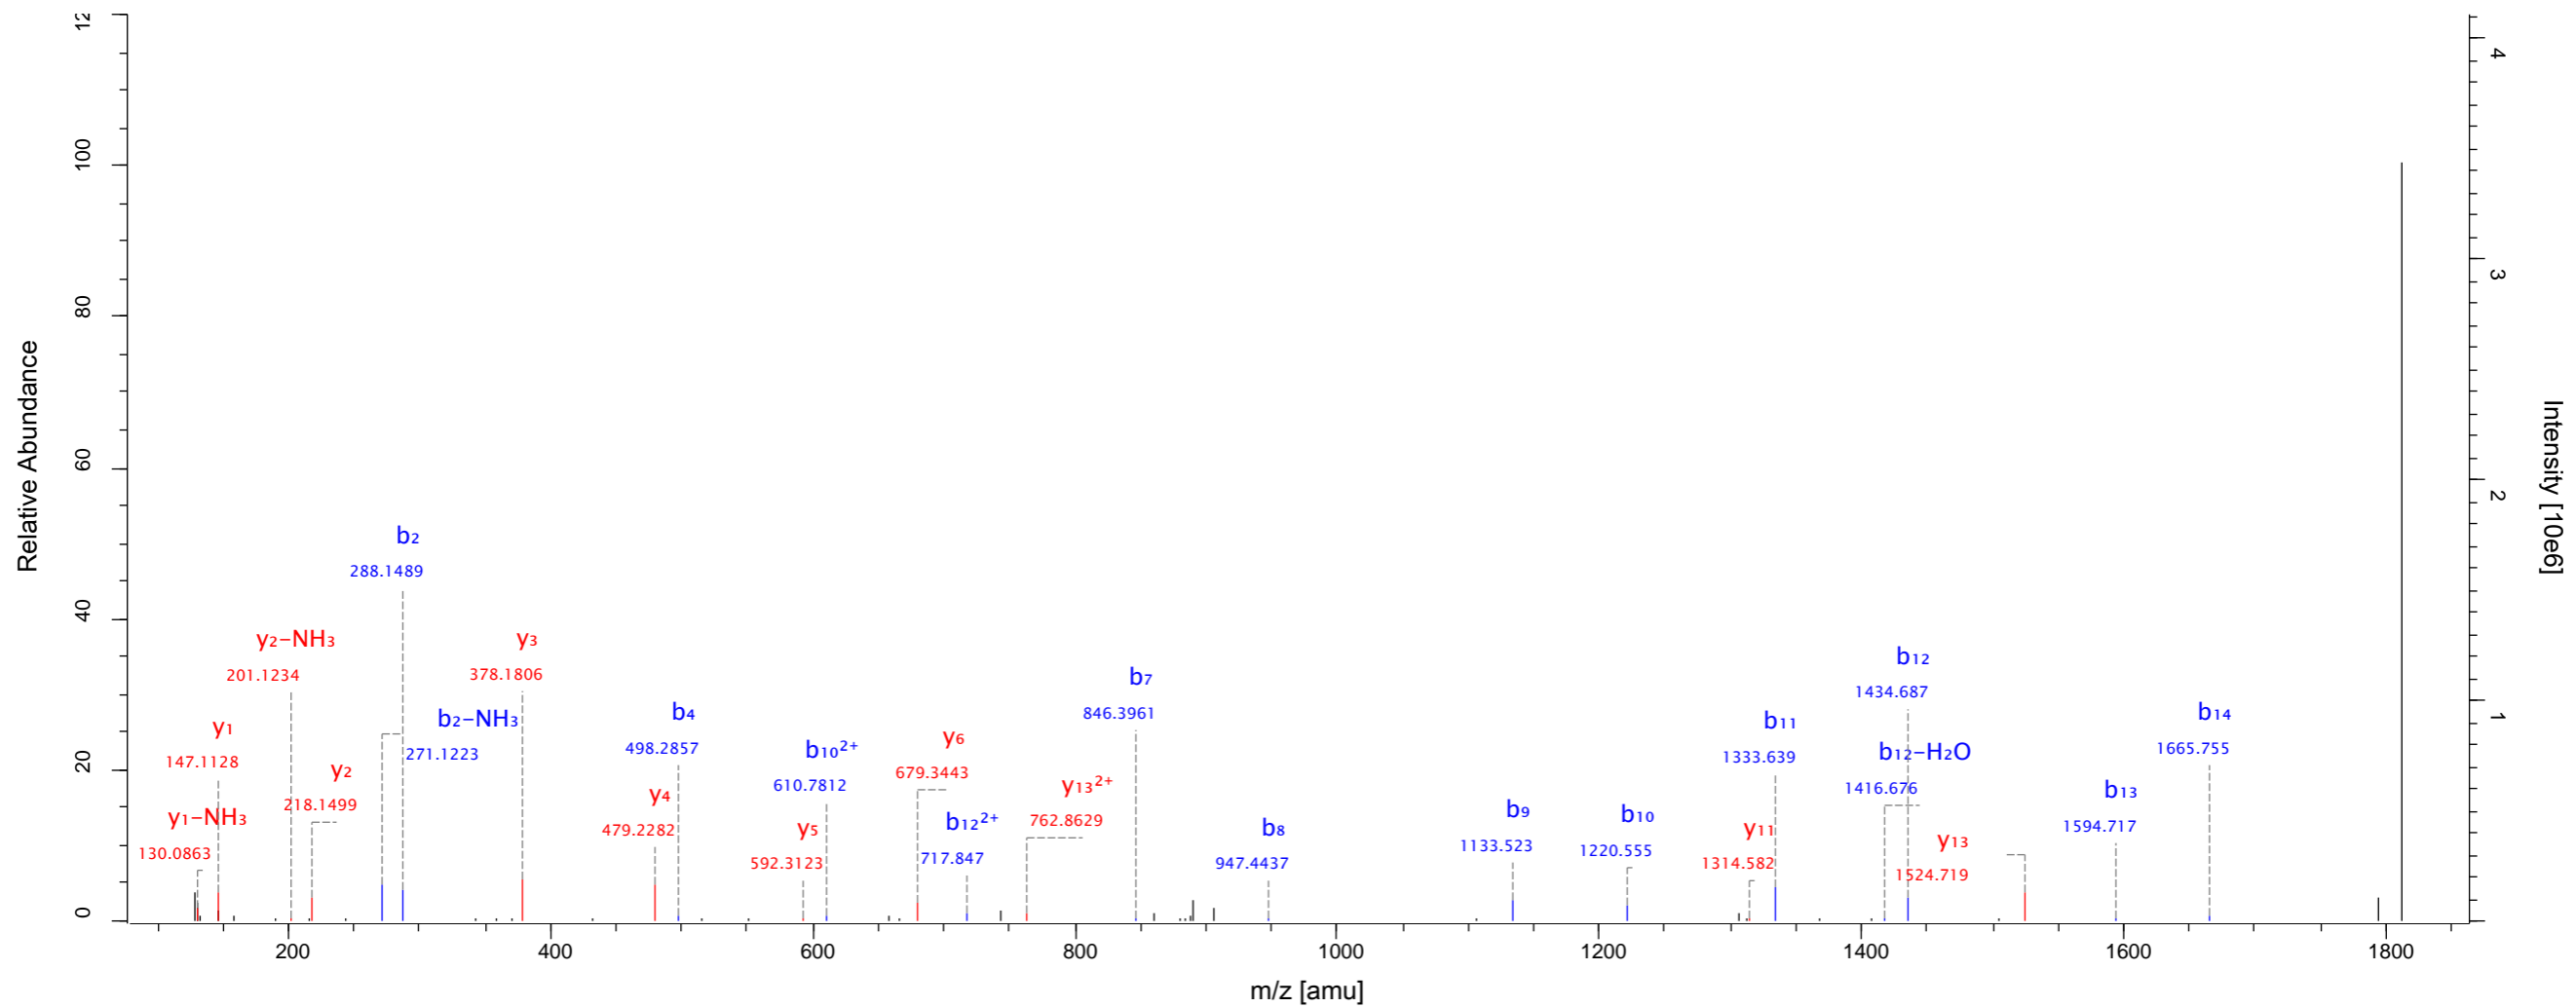

Raw file: 20111212\_EXQ5\_AnMi\_QC\_HCMVp1\_27

Scan number: 30970

Protein: ORFL321W + NC\_006273.2[191968,194126]+ <unknown description>; ORFL321W.iORF1 + NC\_006273.2[191968,194126]+ <unknown description>; ORFL321W.iORF4 + NC\_006273.2[193200,194126]+ <unknown description>

Peptide score: 113.65

Method: FTMS; HCD

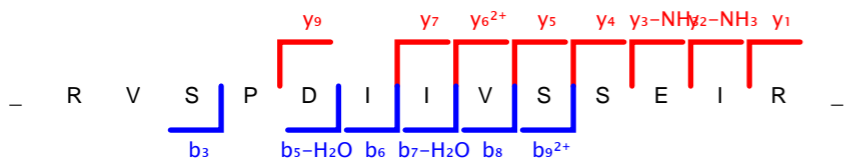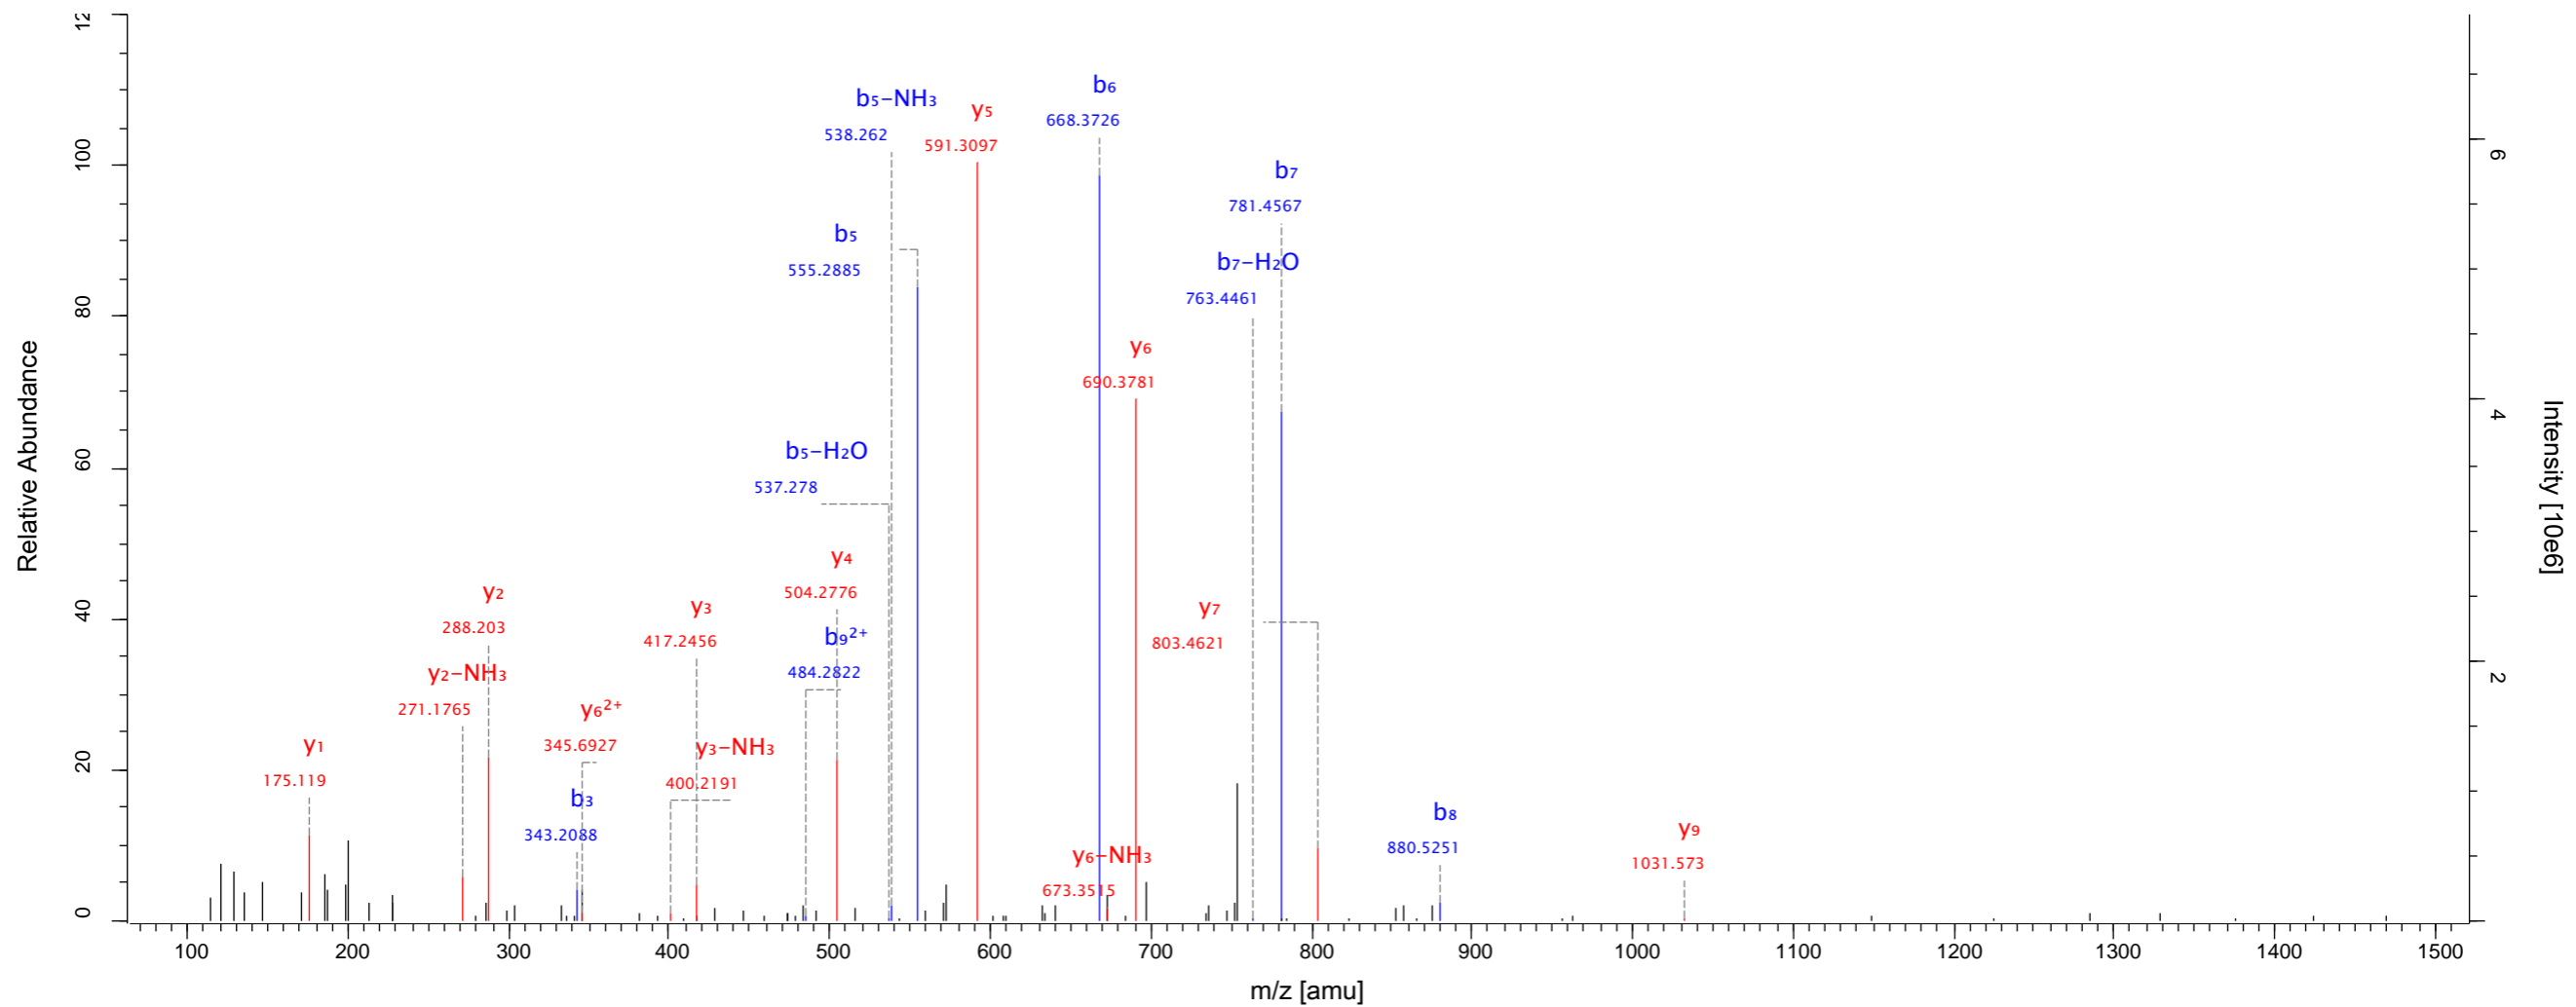

Raw file: 20111212\_EXQ5\_AnMi\_QC\_HCMVp1\_27  
Scan number: 33014  
Protein: ORFL86W + NC\_006273.2[38059,38538]+ <unknown description>  
Peptide score: 92.06  
Method: FTMS; HCD

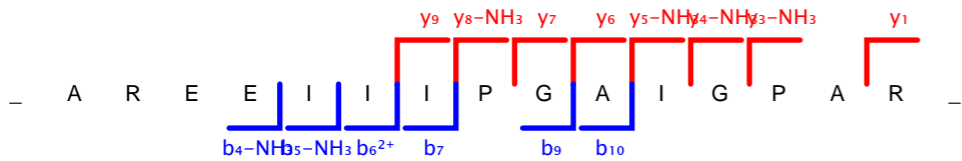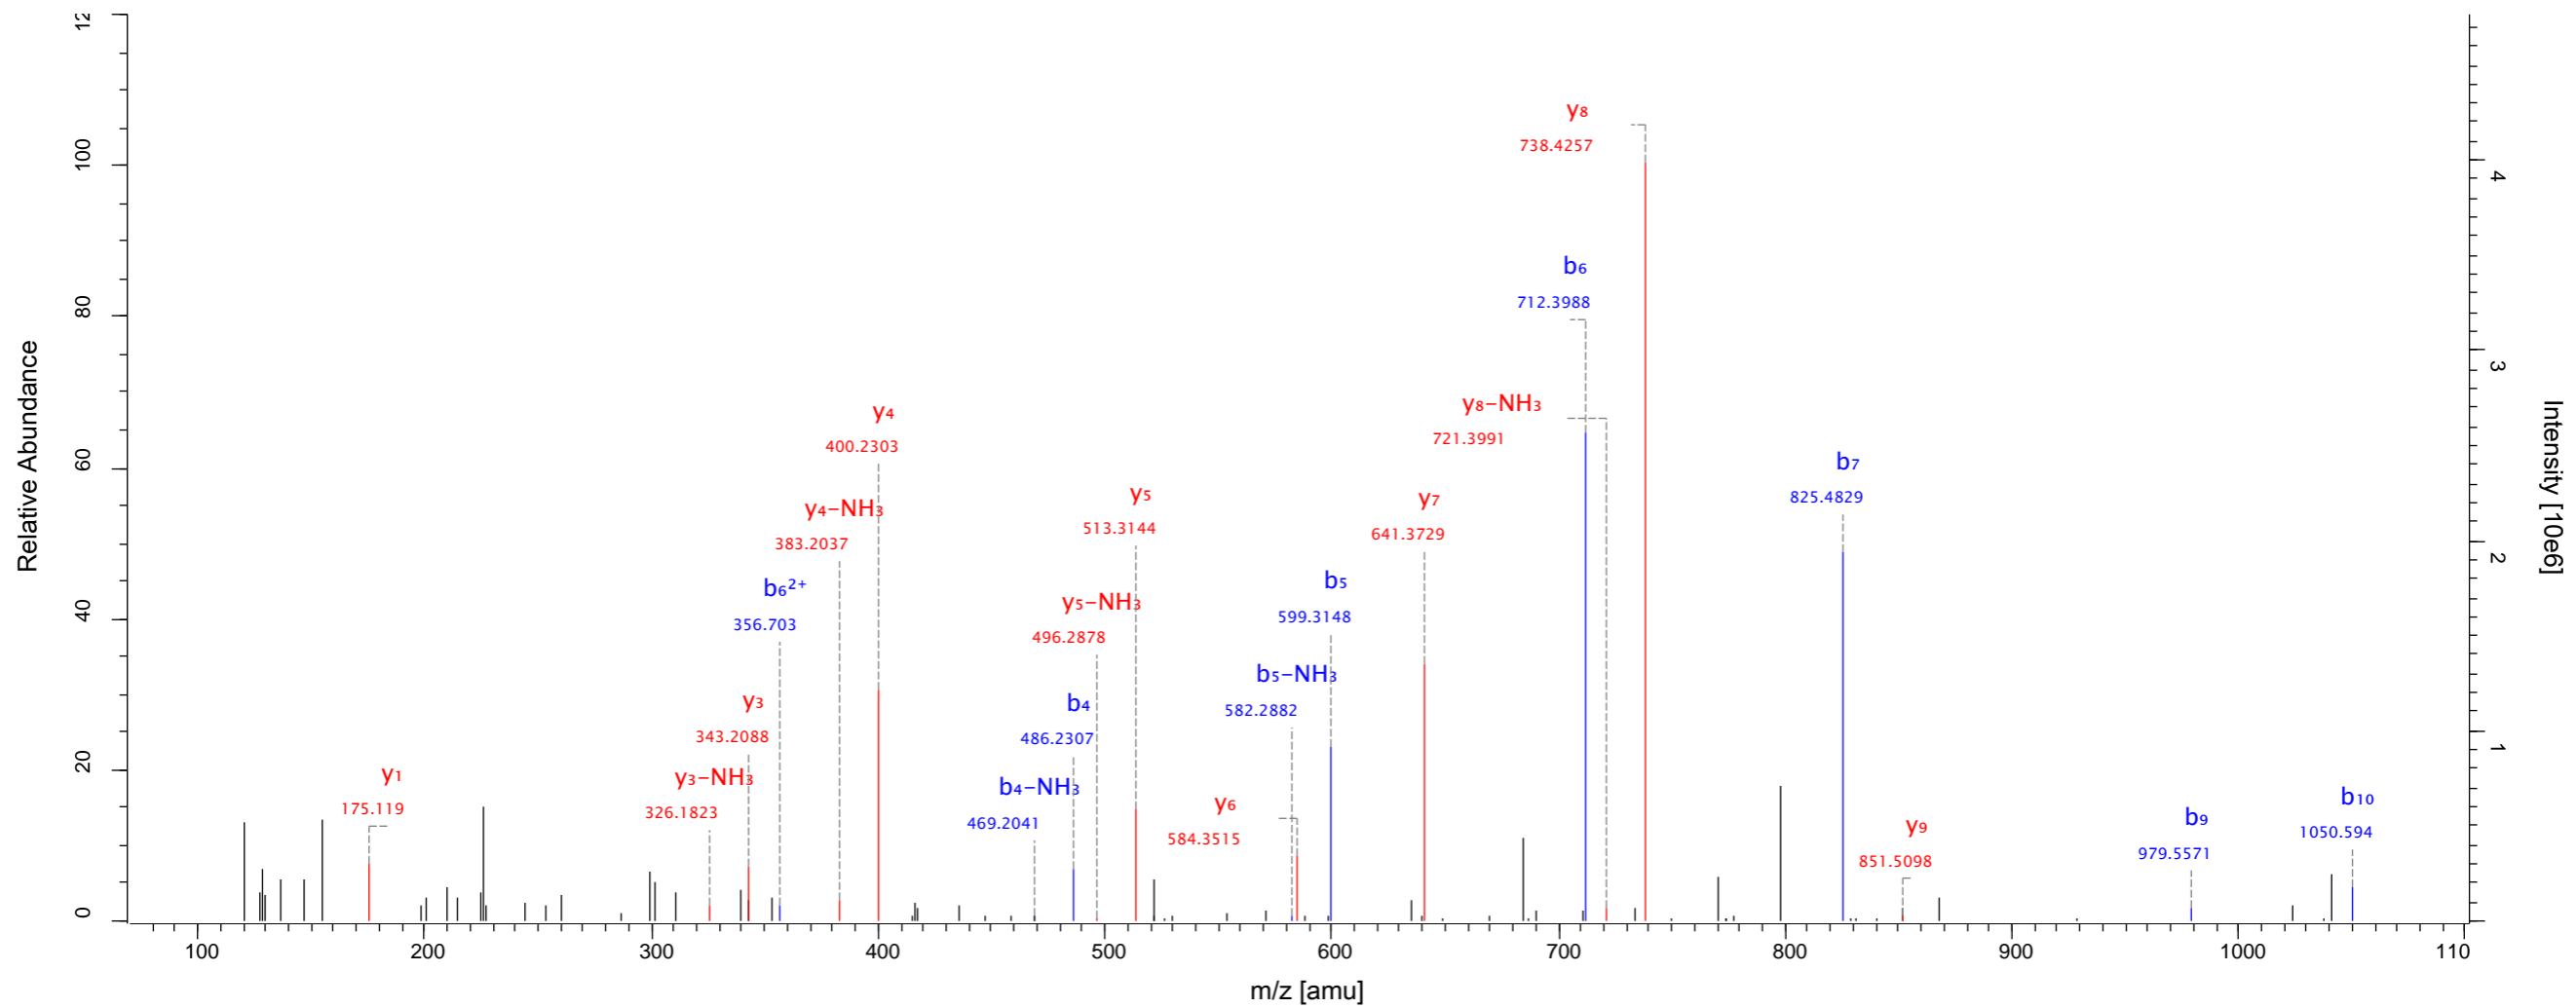



Raw file: 20111212\_EXQ5\_AnMi\_QC\_HCMVp1\_27  
 Scan number: 34075  
 Protein: ORFL161C.iORF2 - NC\_006273.2[101063,101479]- <unknown description>  
 Peptide score: 195.27  
 Method: FTMS; HCD

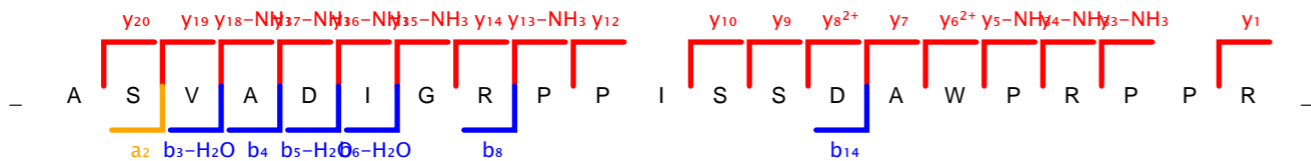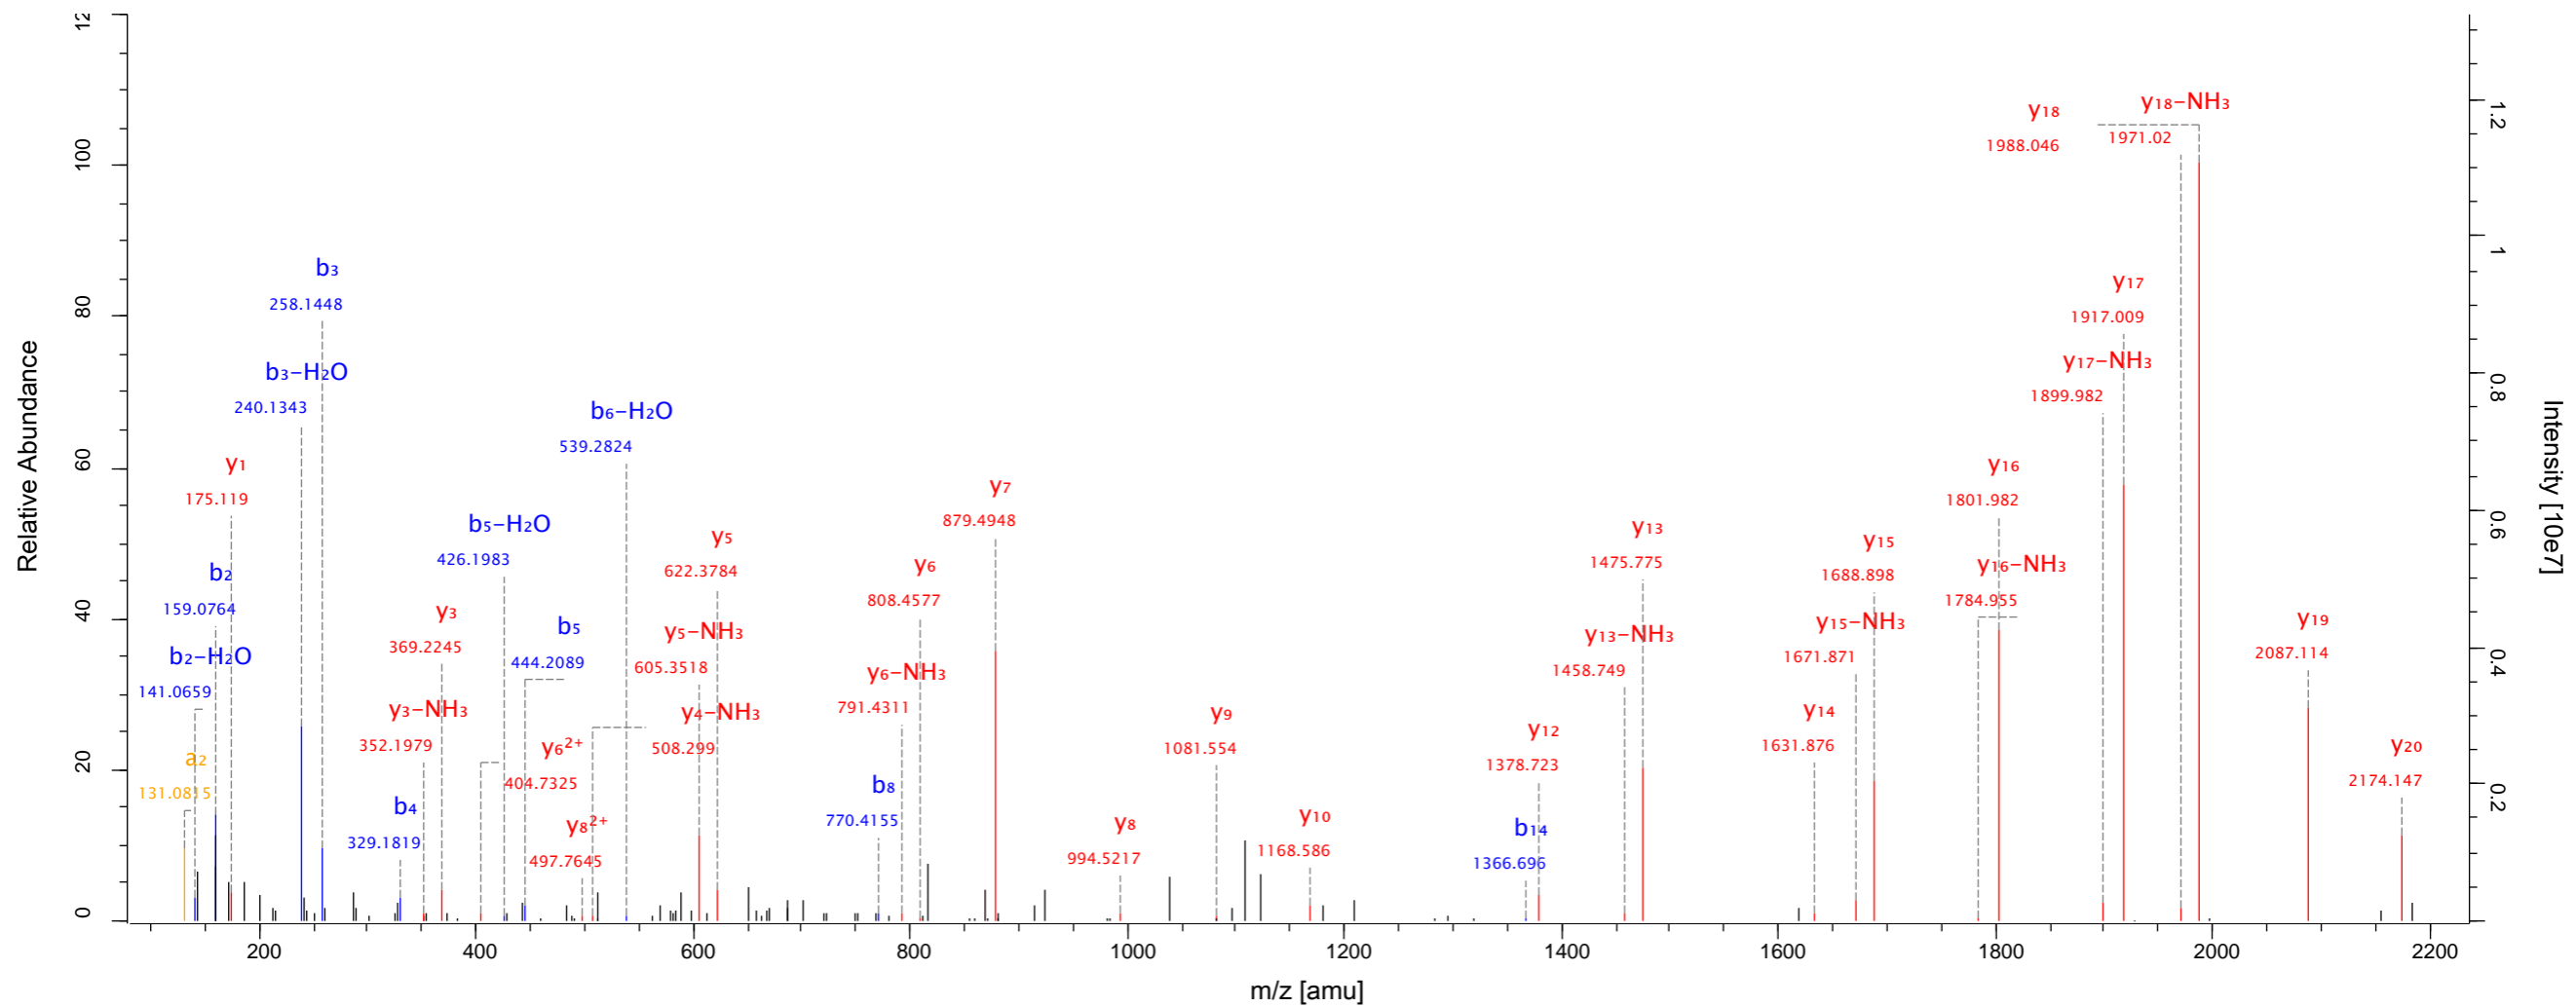

Raw file: 20111212\_EXQ5\_AnMi\_QC\_HCMVp1\_27  
Scan number: 34177  
Protein: ORFL130W + NC\_006273.2[72313,72744]+ <unknown description>  
Peptide score: 84.66  
Method: FTMS; HCD

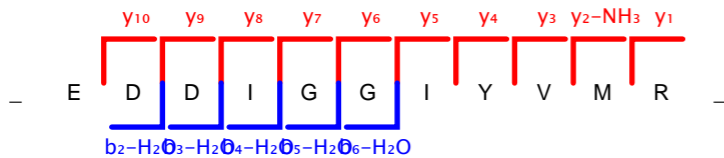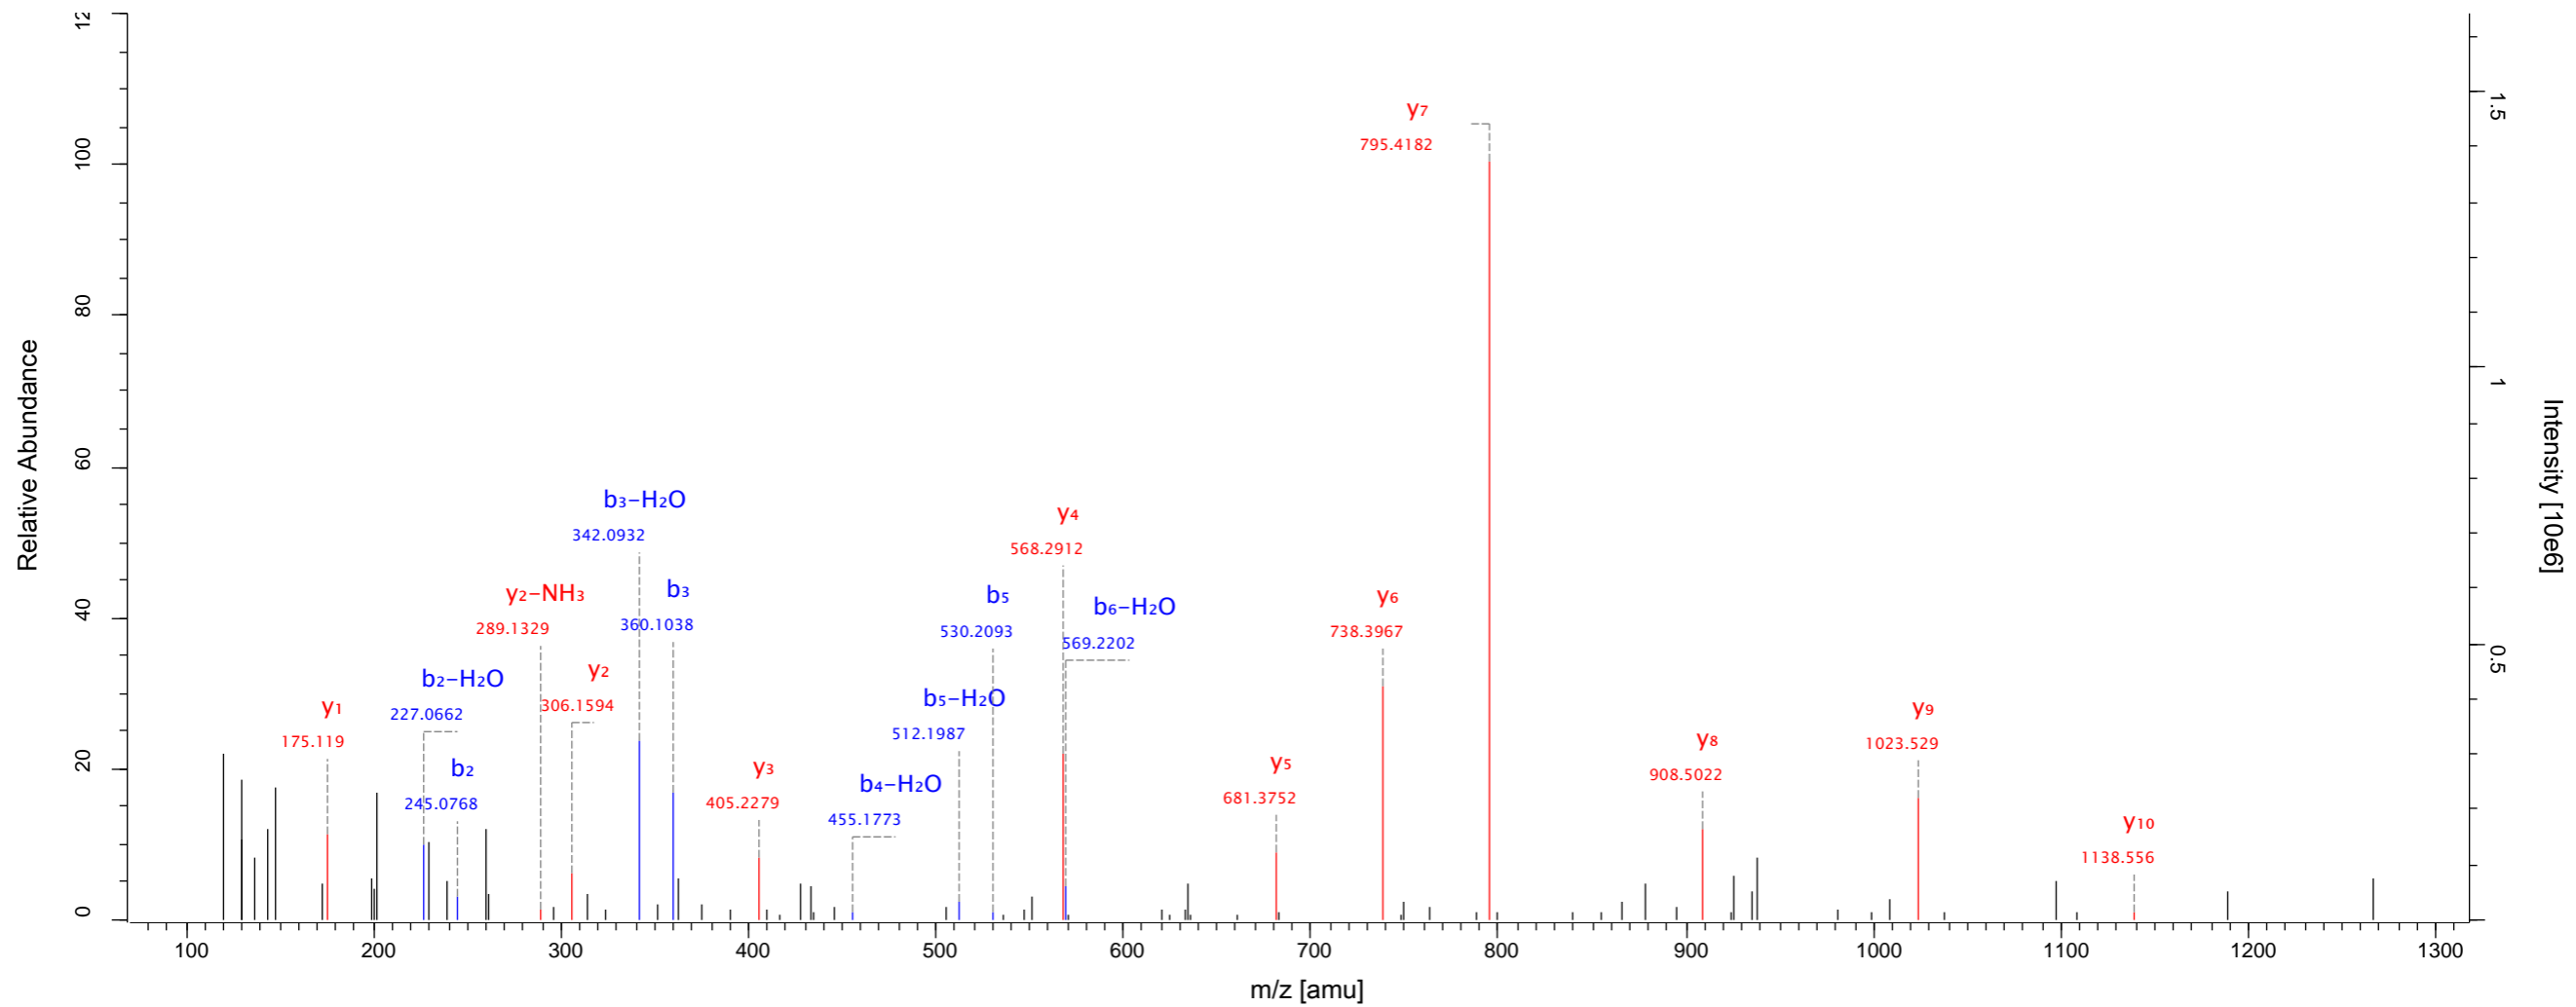

Raw file: 20111212\_EXQ5\_AnMi\_QC\_HCMVpI1\_27  
Scan number: 34920  
Protein: ORFL190C - NC\_006273.2[111965,112384]- <unknown description>  
Peptide score: 104.79  
Method: FTMS; HCD

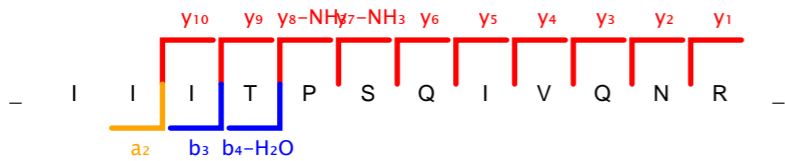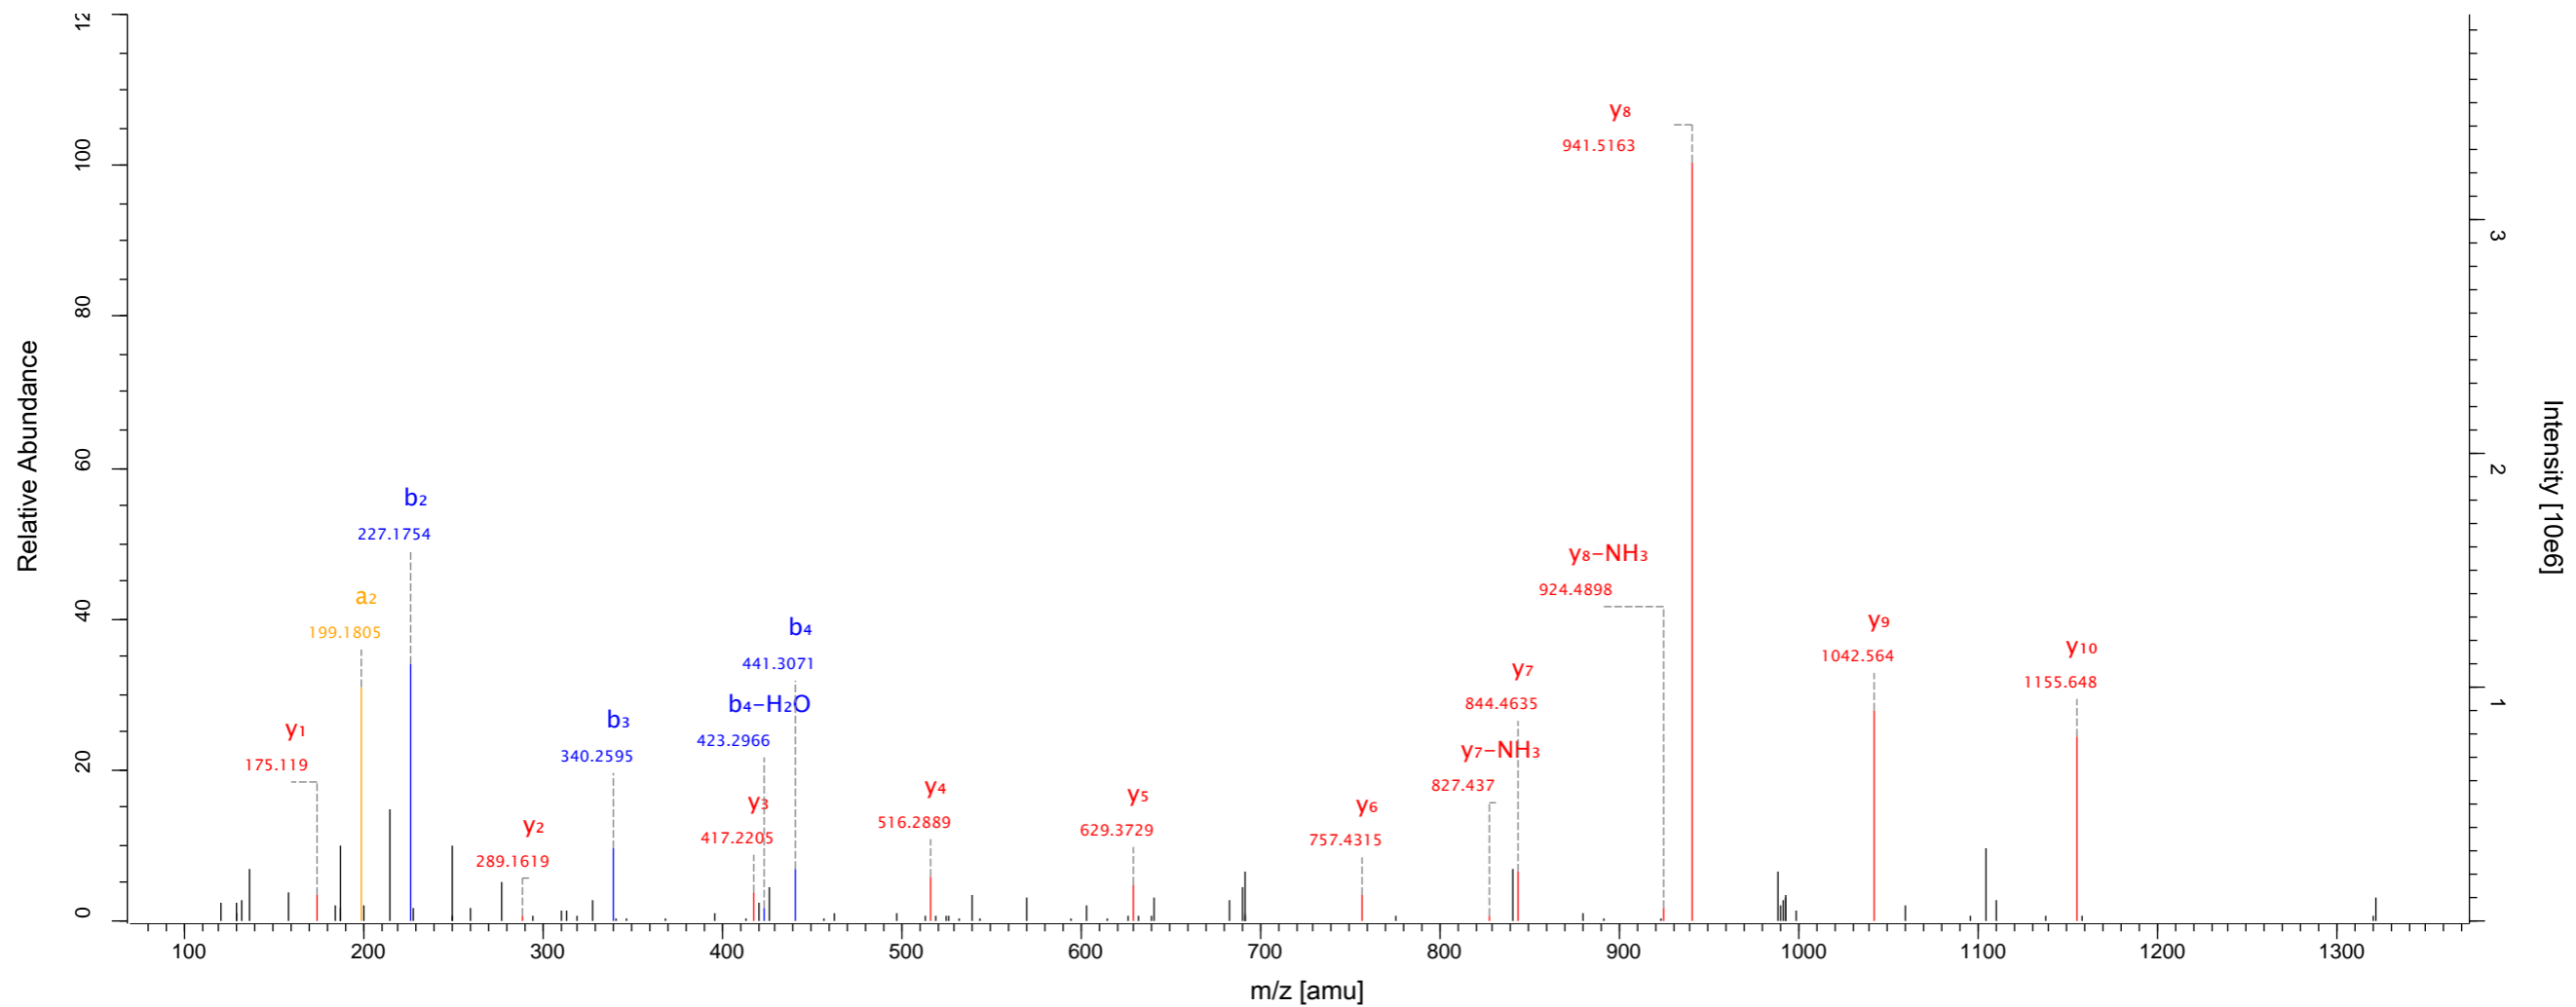

Raw file: 20111212\_EXQ5\_AnMi\_QC\_HCMVp1\_27

Scan number: 35182

Protein: ORFL321W + NC\_006273.2[191968,194126]+ <unknown description>; ORFL321W.iORF1 + NC\_006273.2[191968,194126]+ <unknown description>; ORFL321W.iORF4 + NC\_006273.2[193200,194126]+ <unknown description>

Peptide score: 124.45

Method: FTMS; HCD

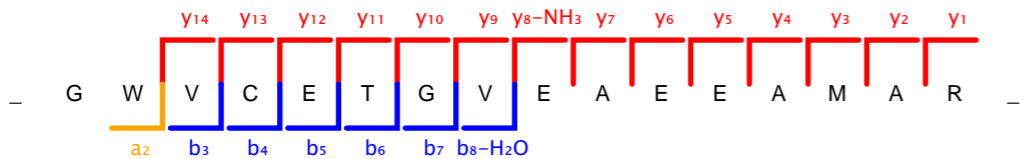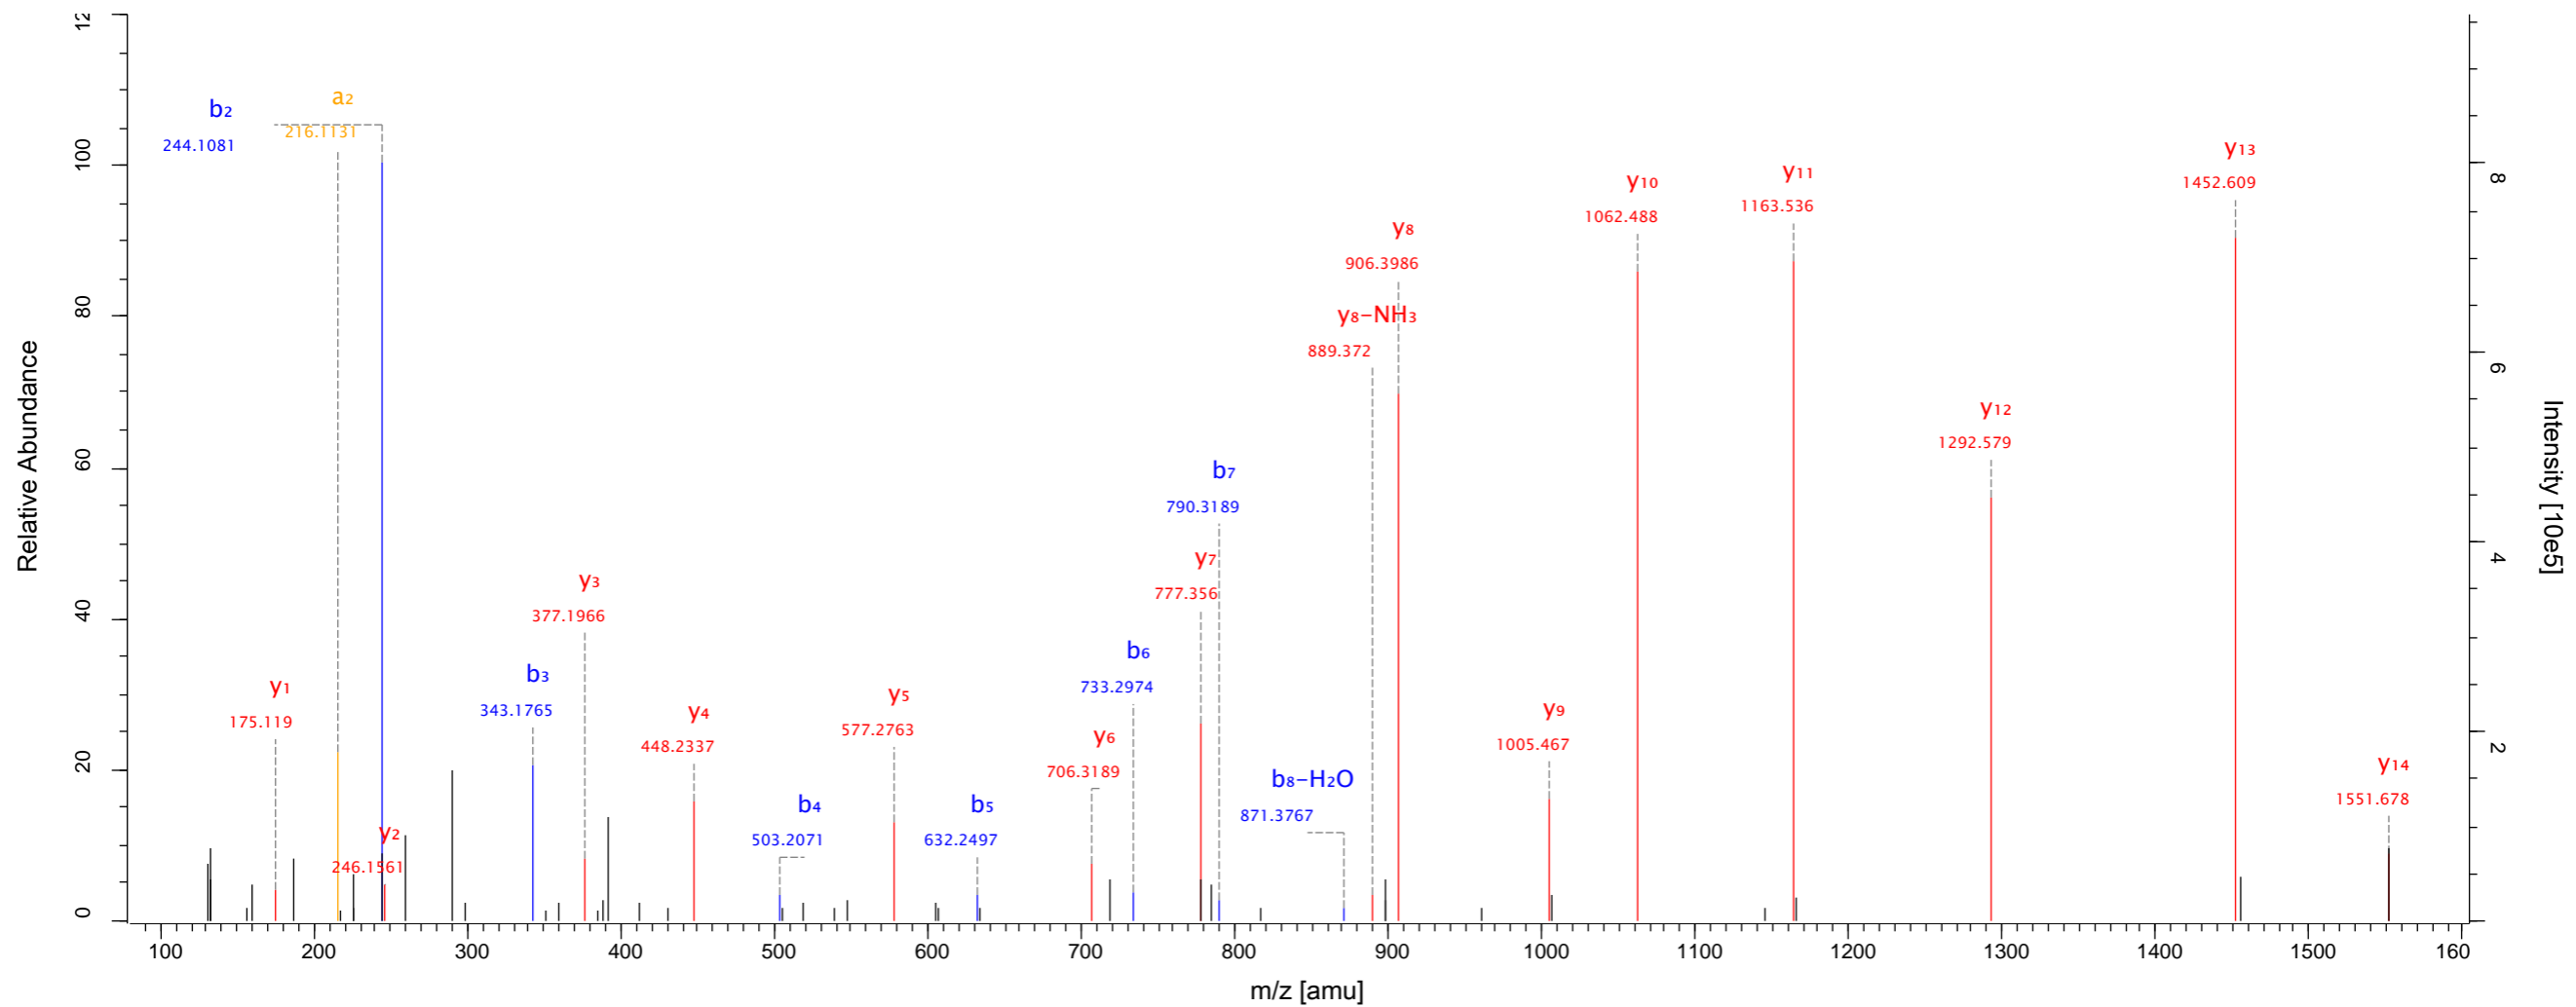

Raw file: 20111212\_EXQ5\_AnMi\_QC\_HCMVp11\_27  
 Scan number: 38592  
 Protein: ORFL119C - NC\_006273.2[63363,63800]- <unknown description>  
 Peptide score: 171.56  
 Method: FTMS; HCD

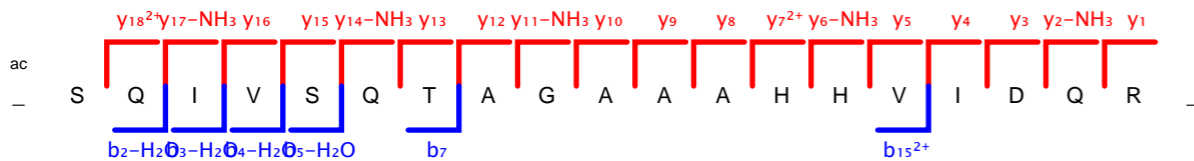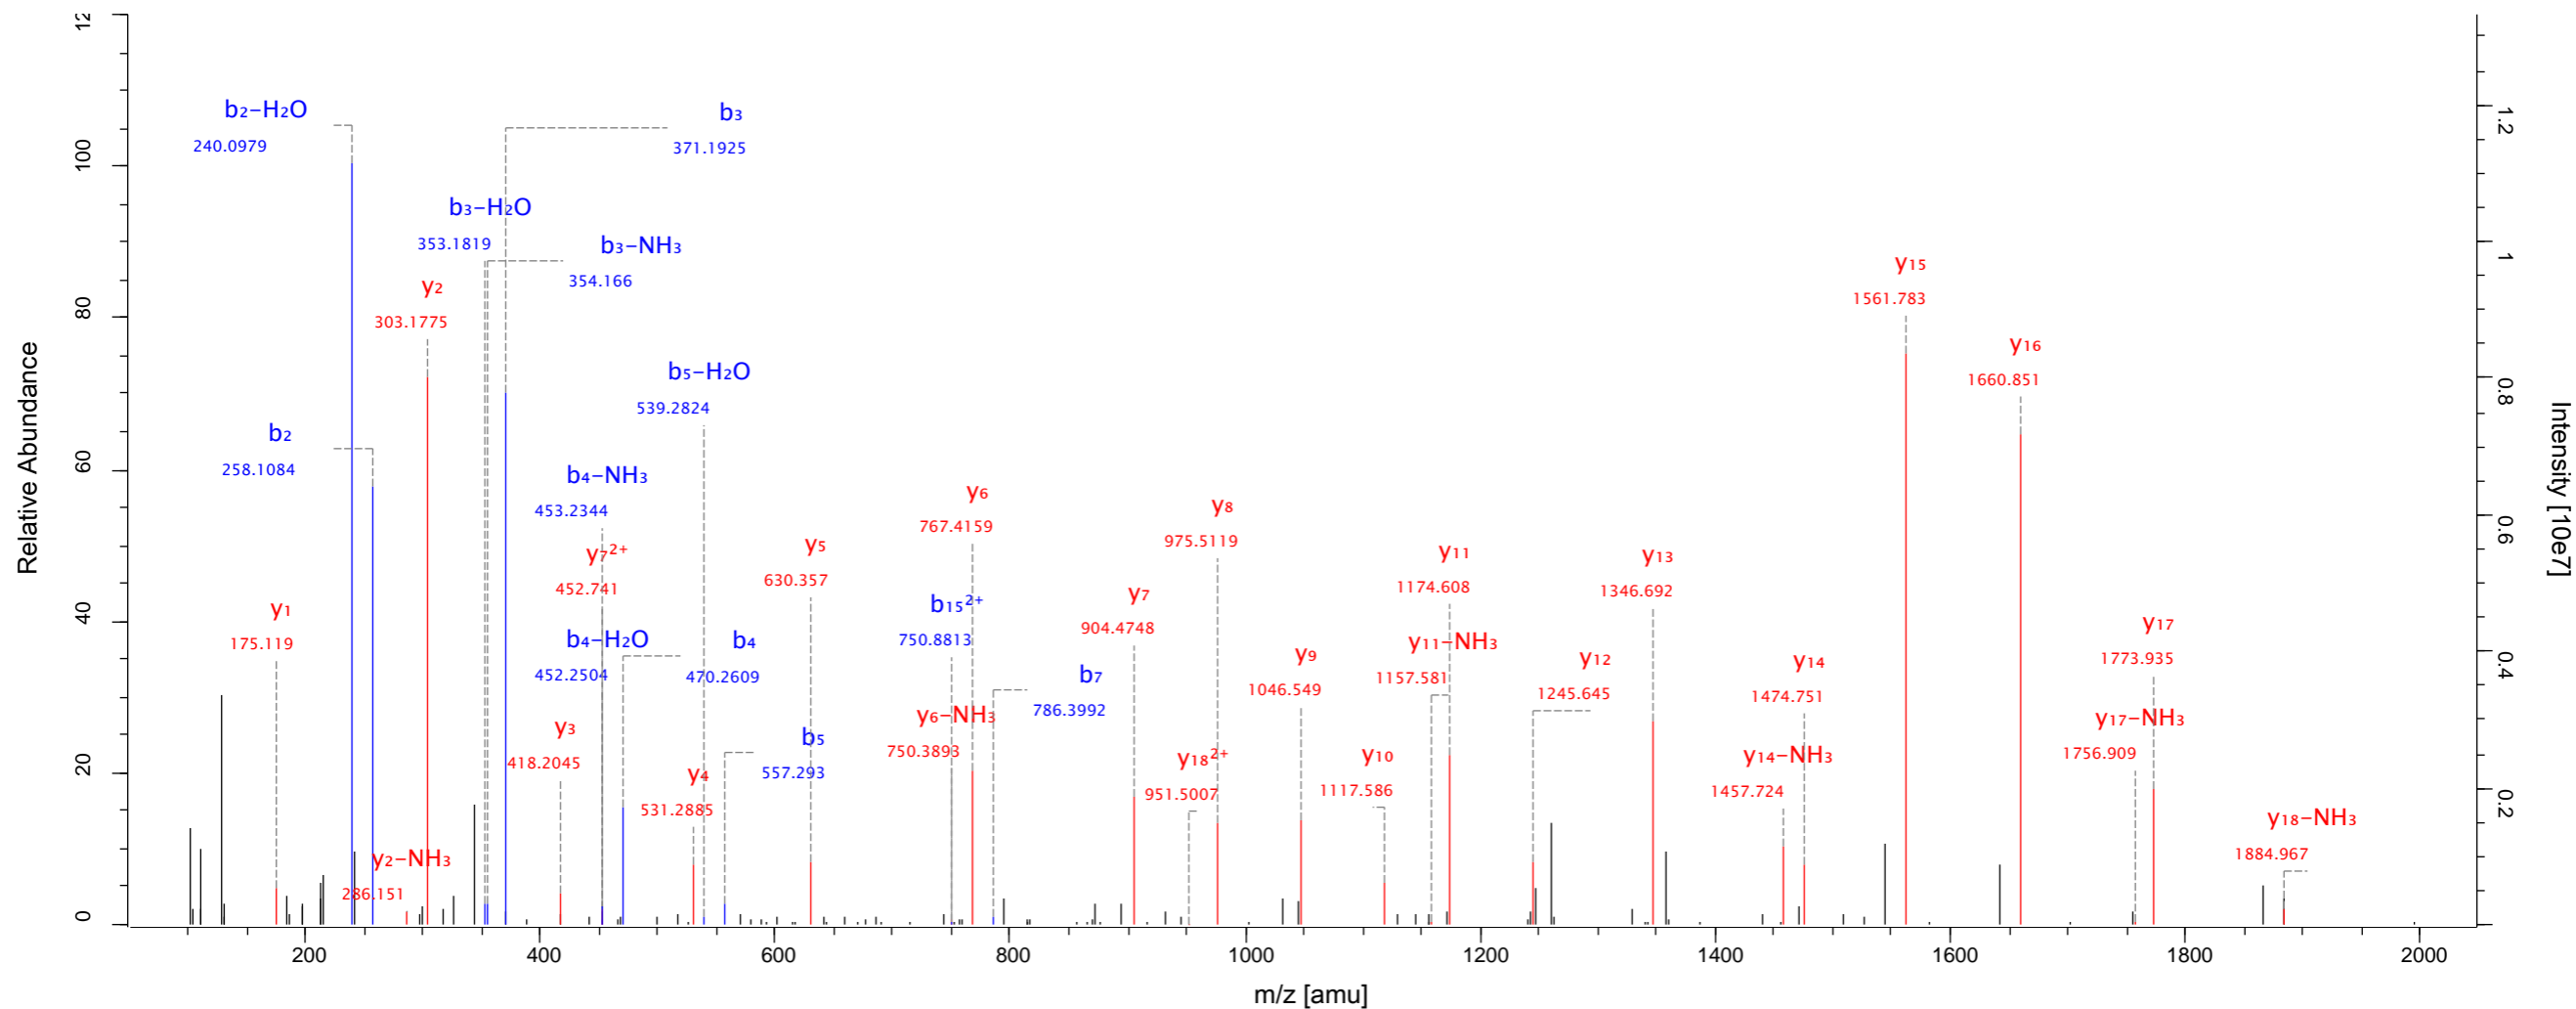

Raw file: 20111212\_EXQ5\_AnMi\_QC\_HCMVp1\_27  
Scan number: 39244  
Protein: ORFS365W + NC\_006273.2[225950,226606]+ <unknown description>  
Peptide score: 94.49  
Method: FTMS; HCD

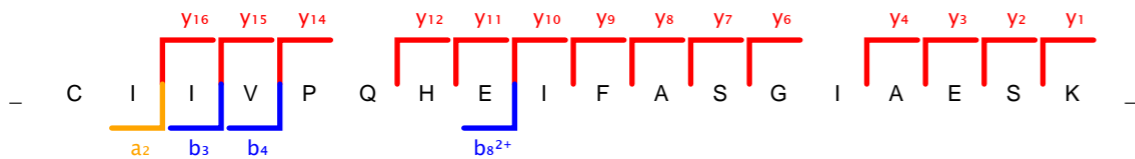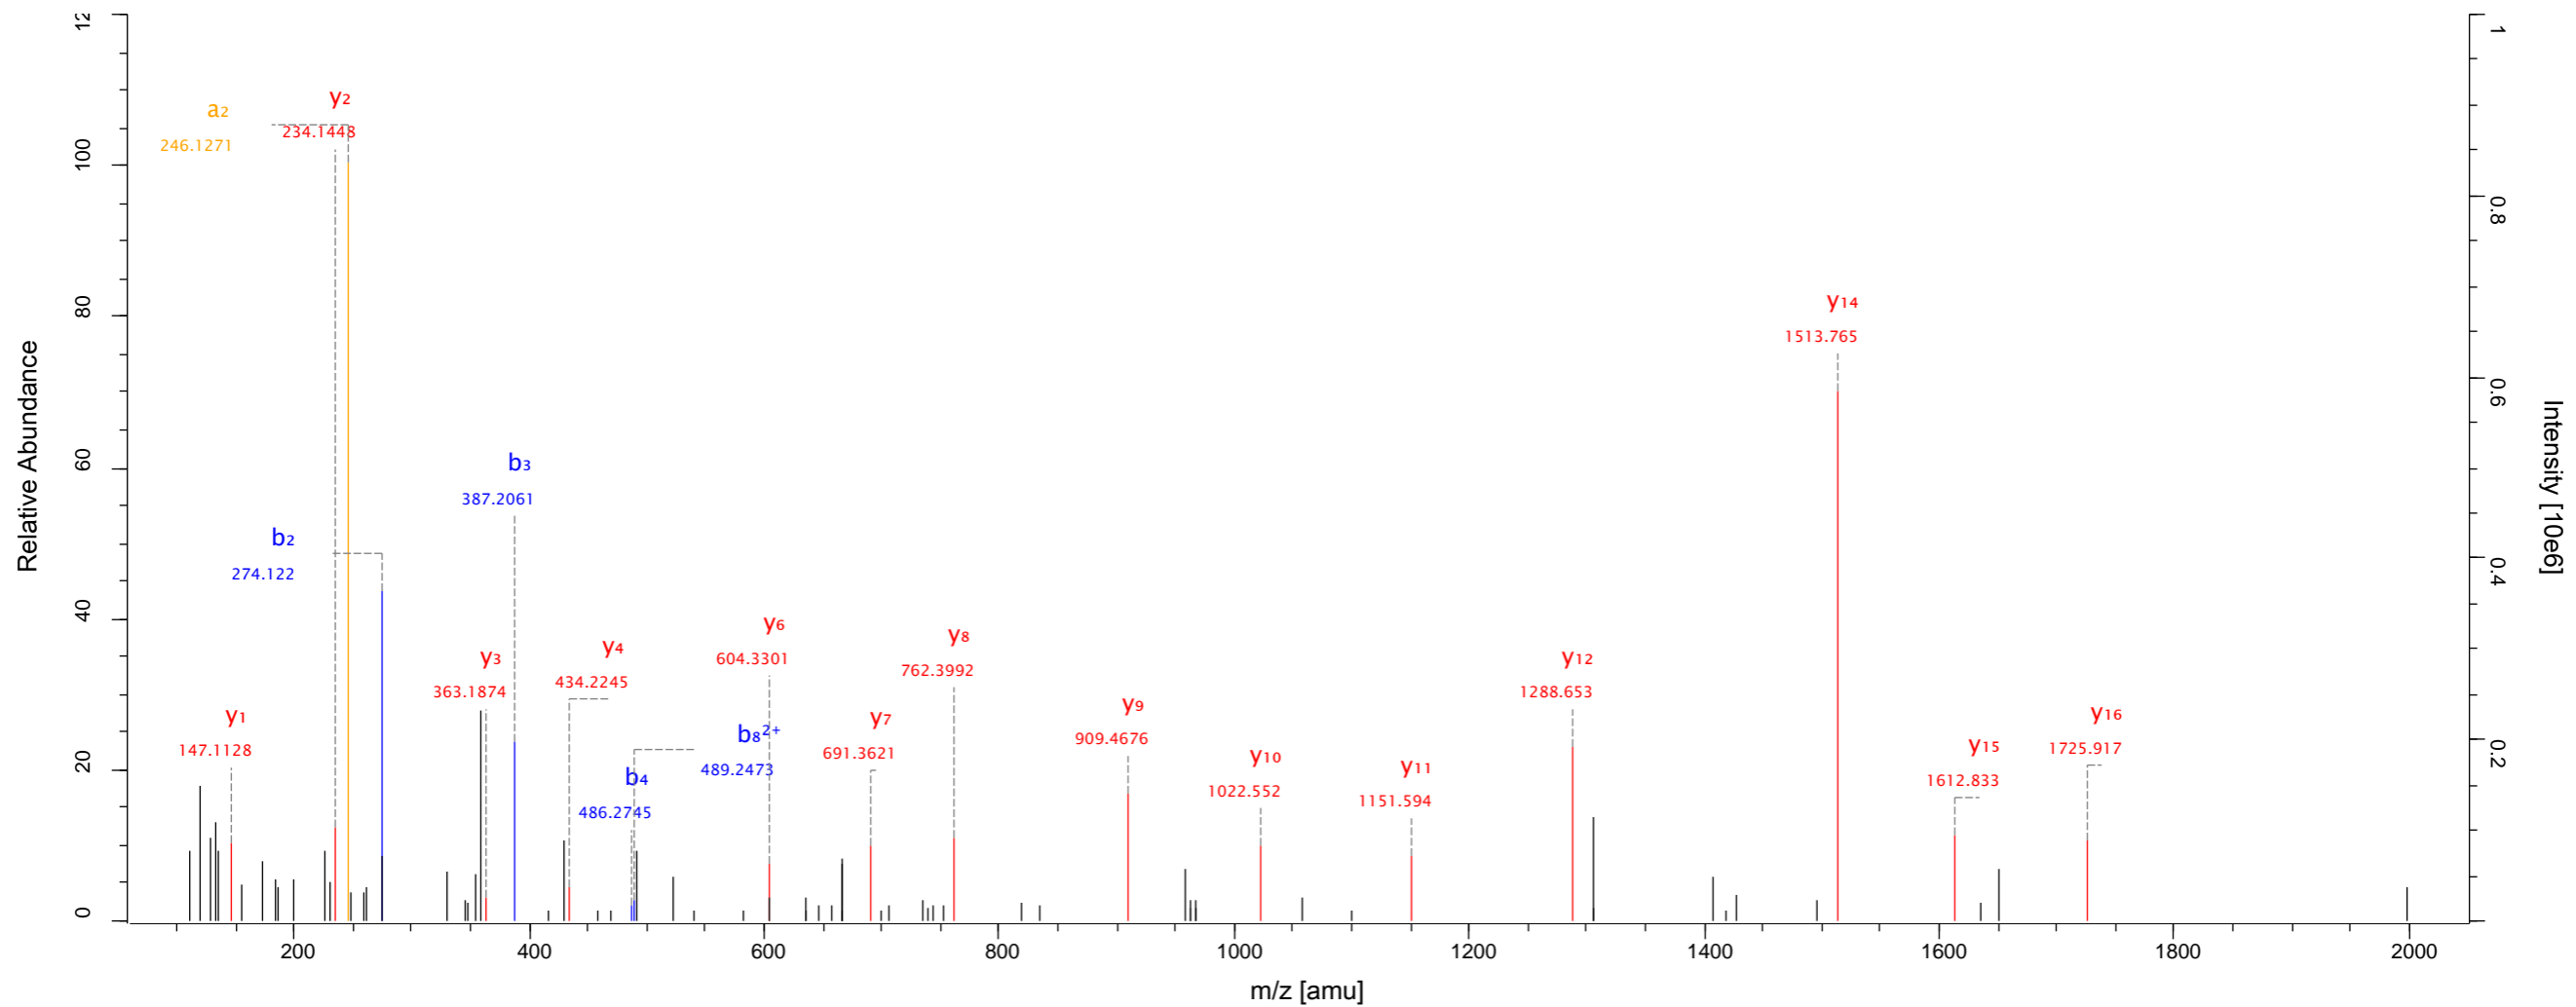

Raw file: 20111212\_EXQ5\_AnMi\_QC\_HCMVp1\_27  
 Scan number: 40618  
 Protein: ORFL119C - NC\_006273.2[63363,63800]- <unknown description>  
 Peptide score: 125.12  
 Method: FTMS; HCD

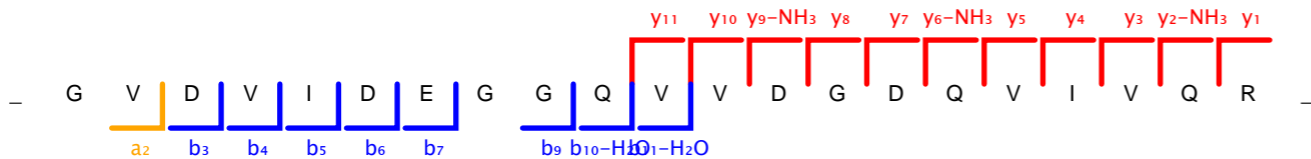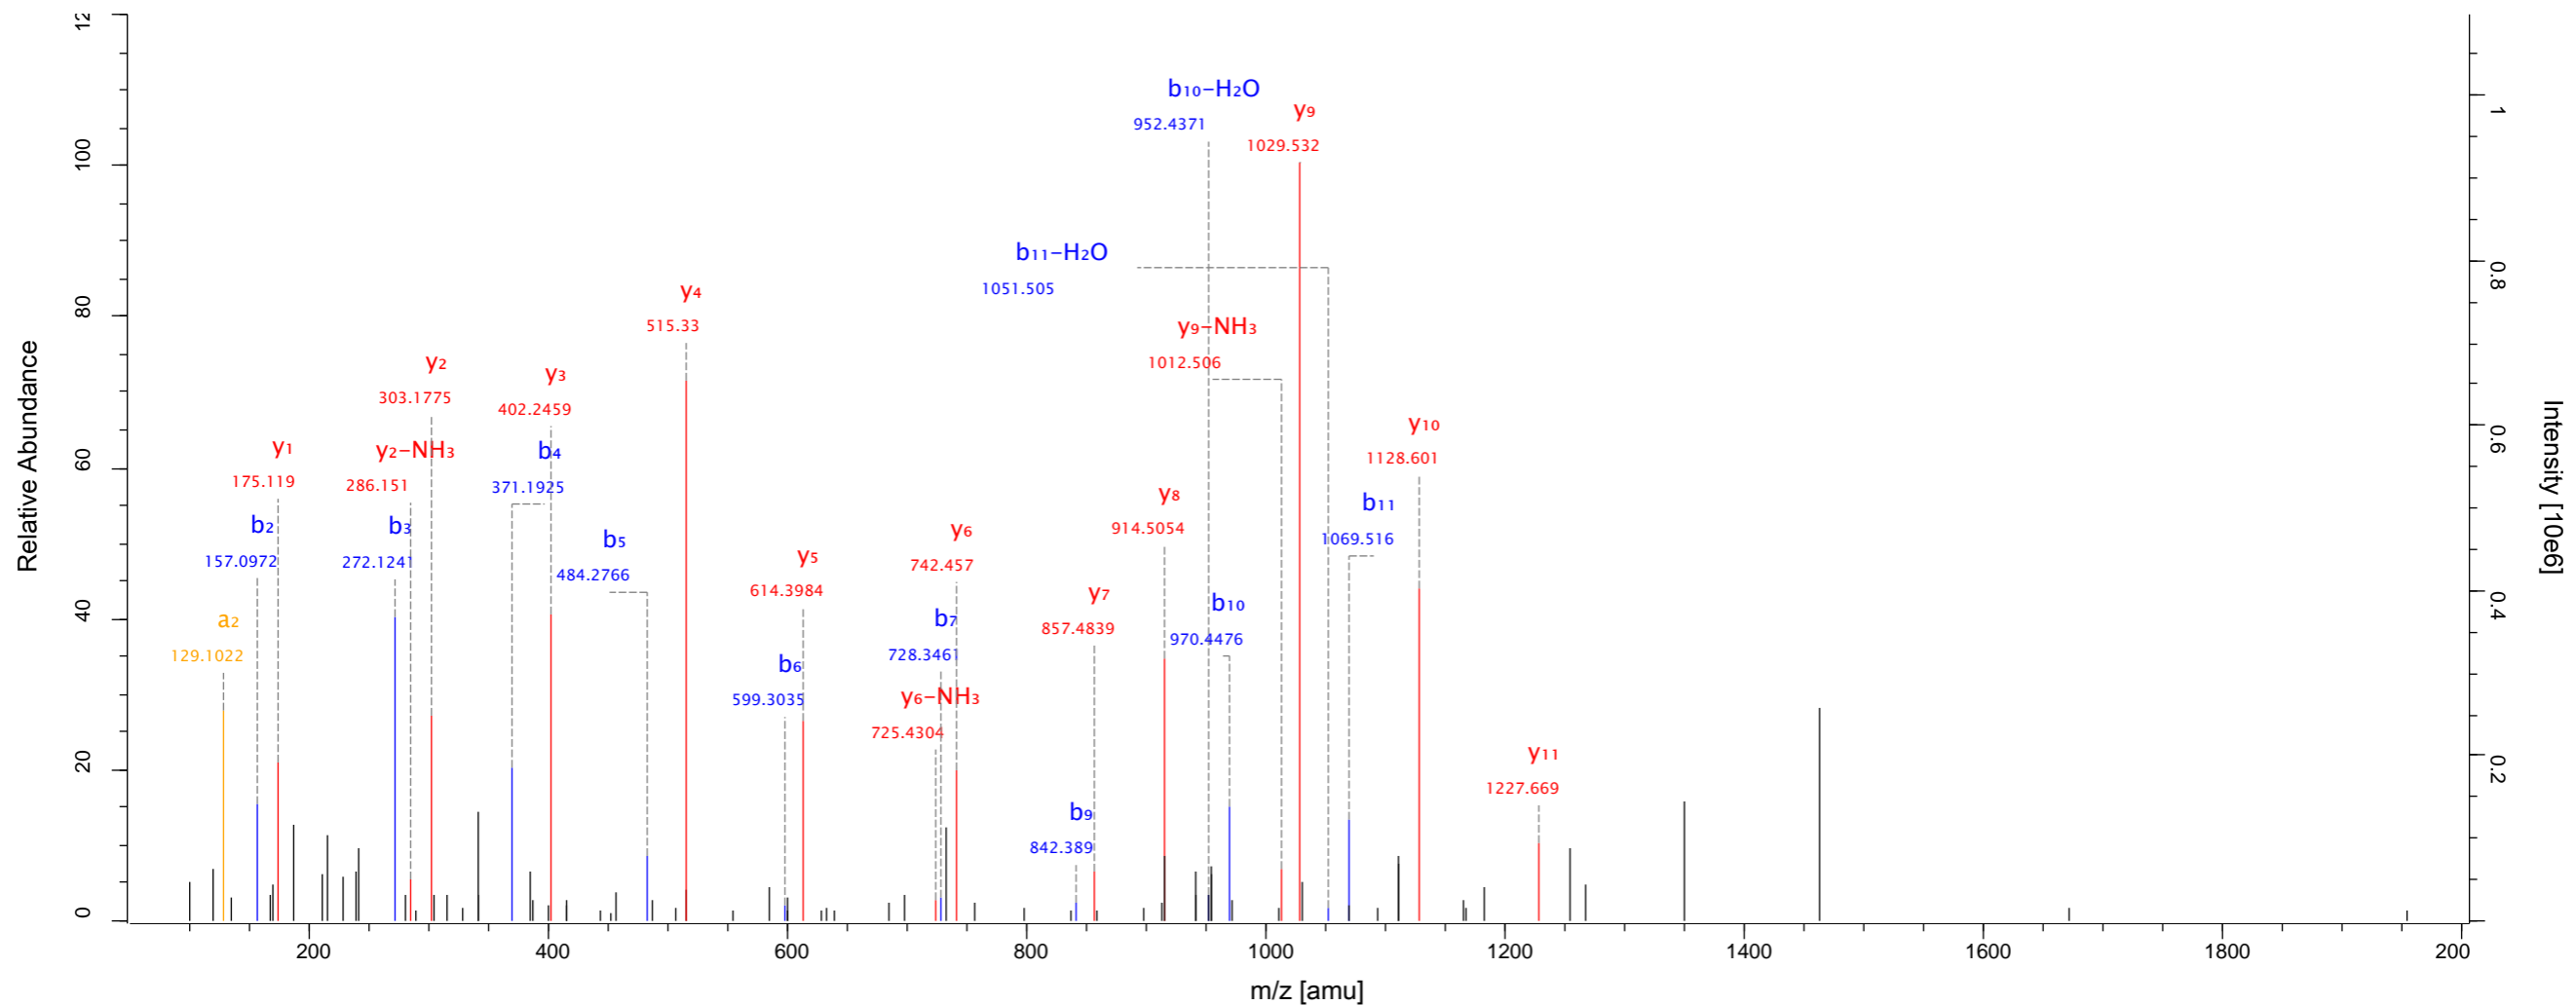

Raw file: 20111212\_EXQ5\_AnMi\_QC\_HCMVp11\_27  
Scan number: 43241  
Protein: ORFL161C.iORF2 - NC\_006273.2[101063,101479]- <unknown description>  
Peptide score: 134.59  
Method: FTMS; HCD

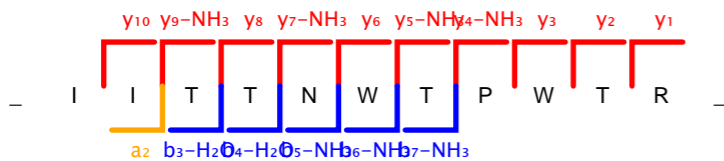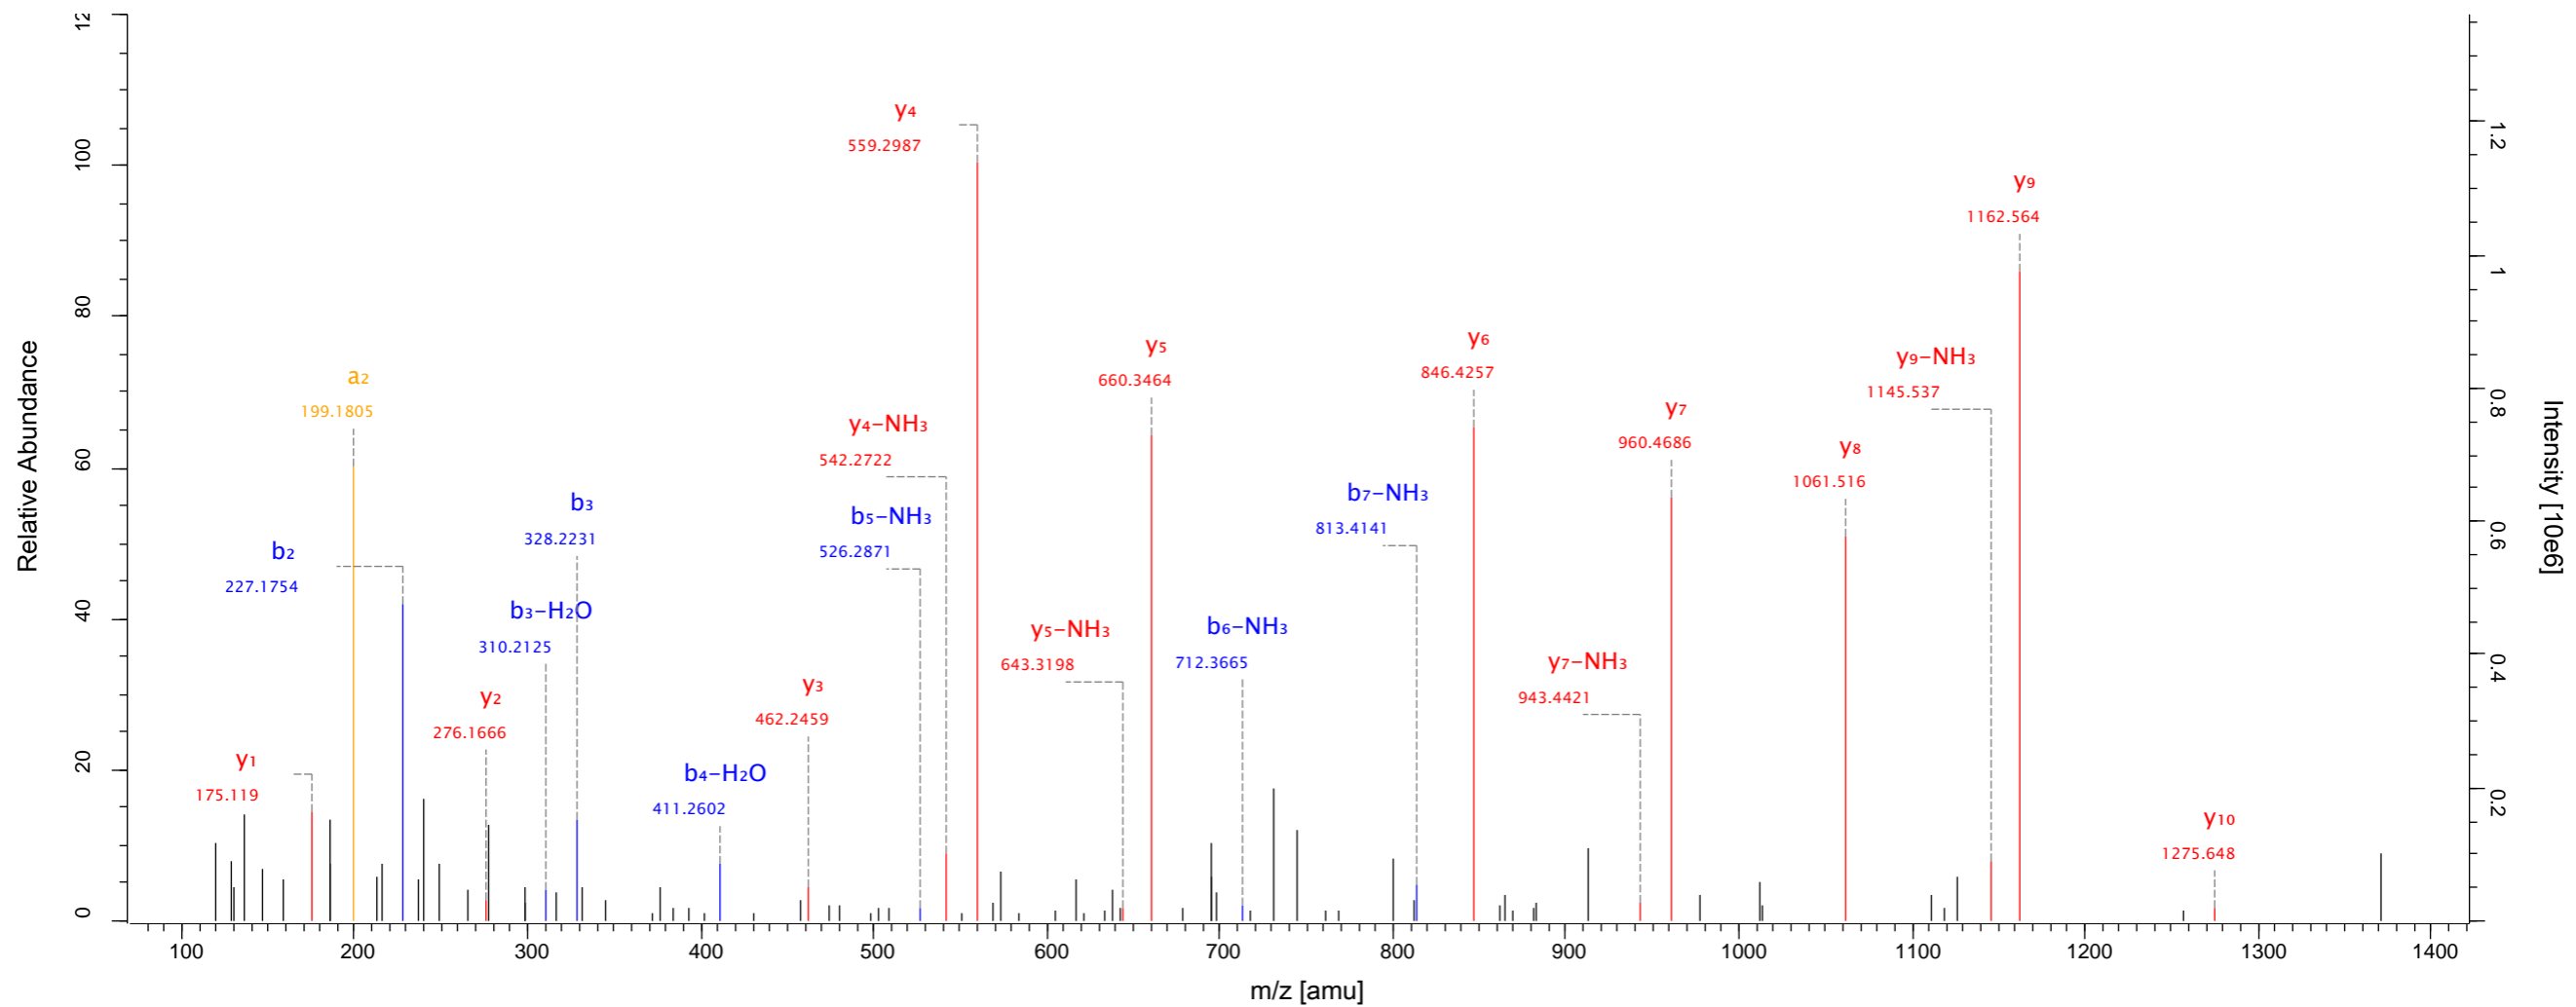



Raw file: 20111212\_EXQ5\_AnMi\_QC\_HCMVp11\_27  
Scan number: 47239  
Protein: ORFL161C.iORF2 - NC\_006273.2[101063,101479]- <unknown description>  
Peptide score: 84.48  
Method: FTMS; HCD

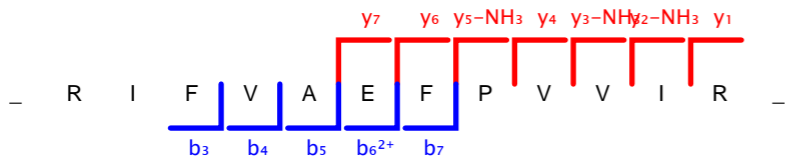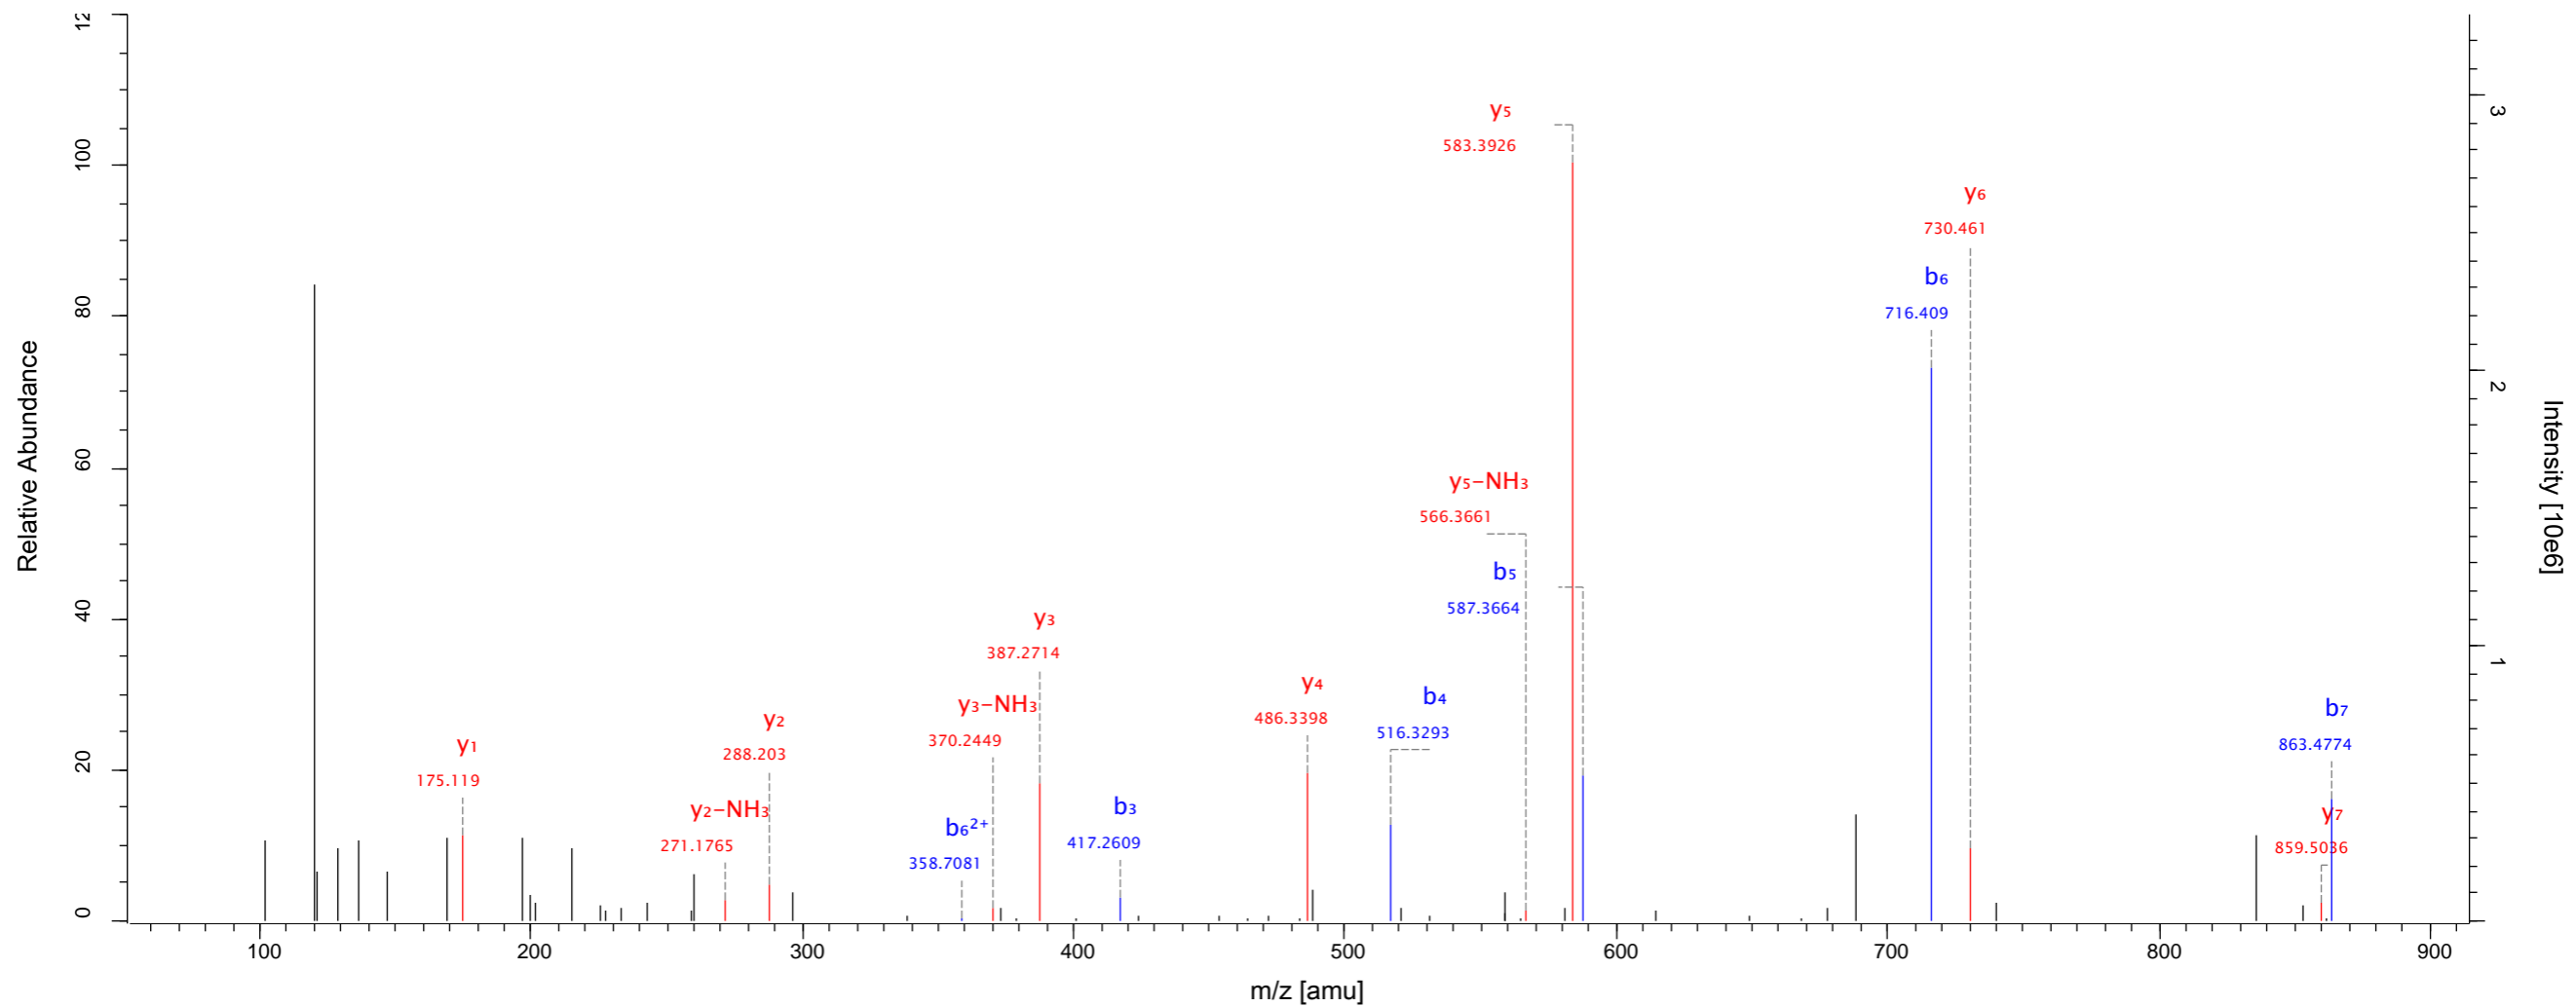

Raw file: 20111212\_EXQ5\_AnMi\_QC\_HCMVp11\_27  
Scan number: 48108  
Protein: ORFL237C - NC\_006273.2[149340,149699]- <unknown description>  
Peptide score: 68.44  
Method: FTMS; HCD

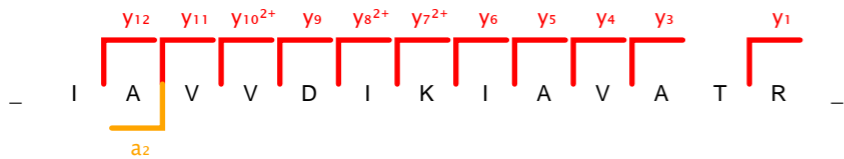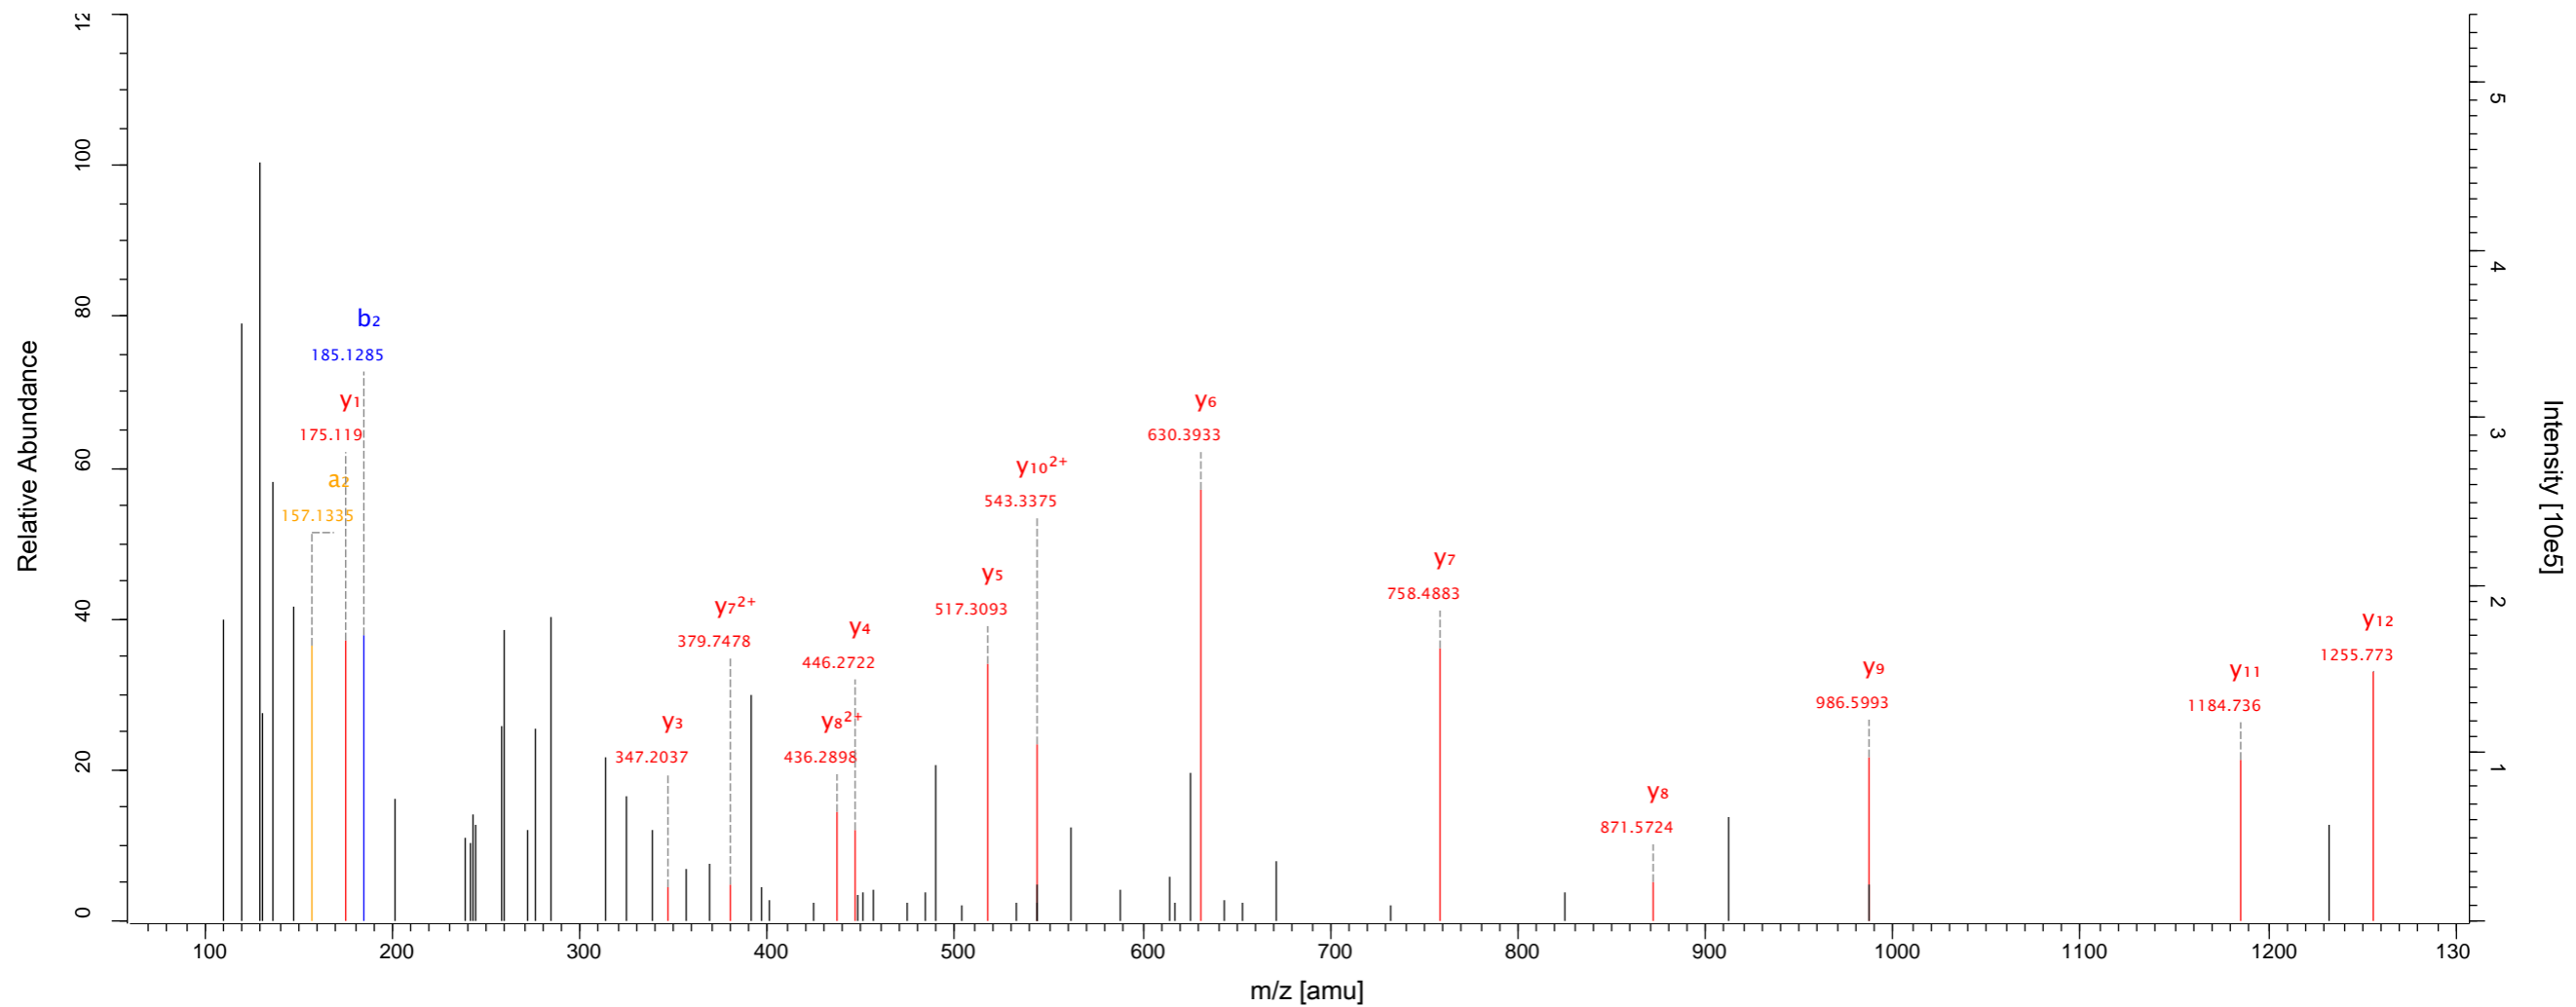

Raw file: 20111212\_EXQ5\_AnMi\_QC\_HCMVp1\_27  
 Scan number: 48331  
 Protein: ORFL237C - NC\_006273.2[149340,149699]- <unknown description>  
 Peptide score: 106.13  
 Method: FTMS; HCD

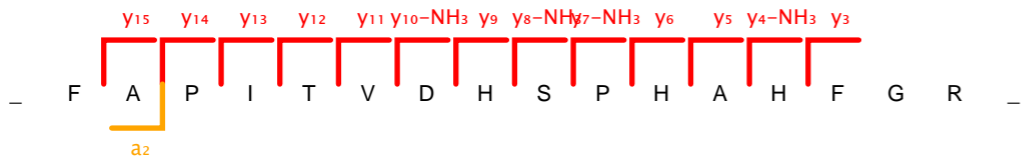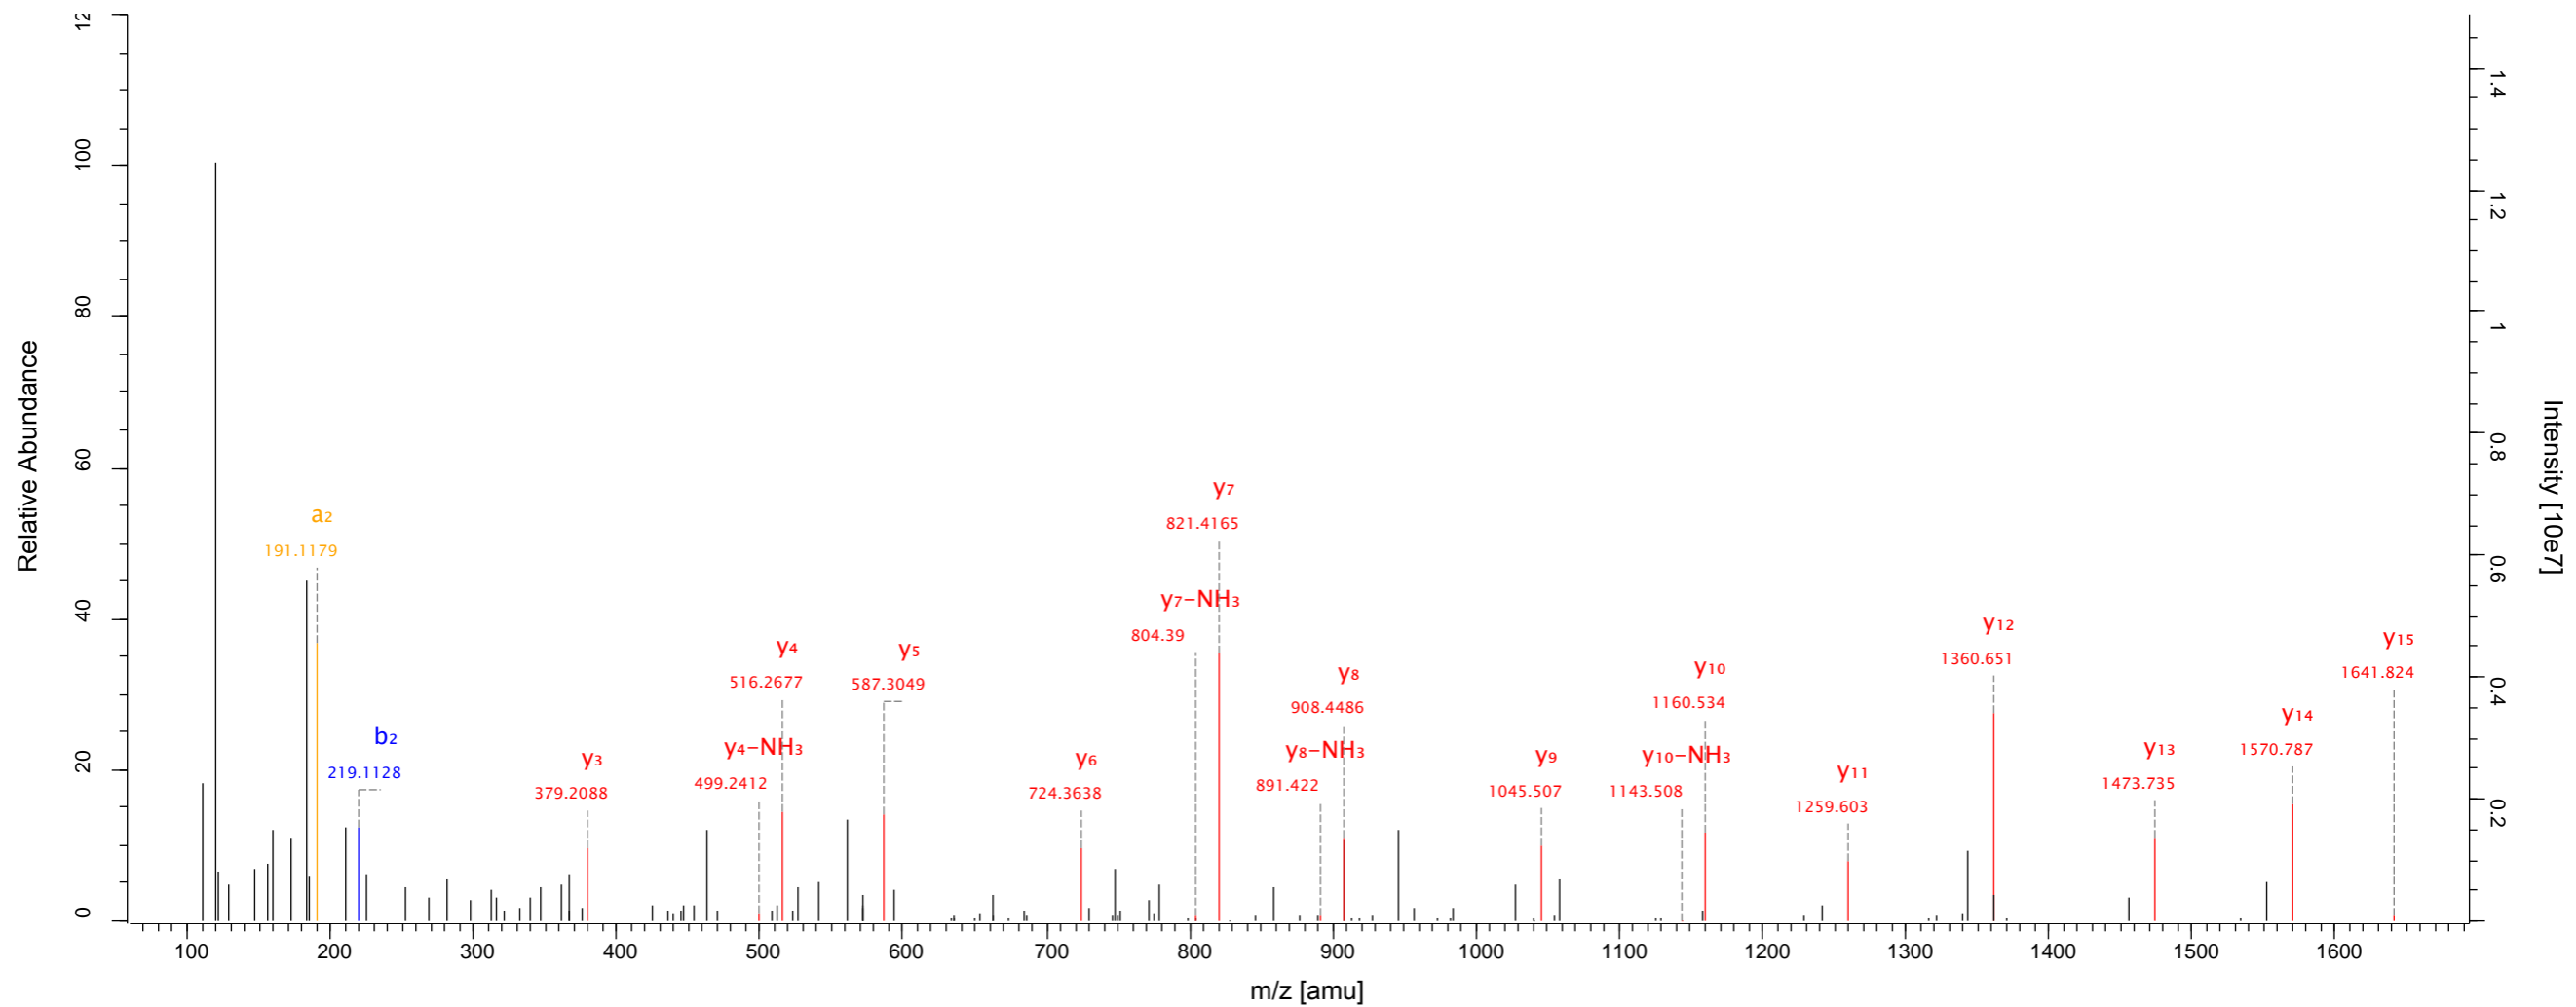

Raw file: 20111212\_EXQ5\_AnMi\_QC\_HCMVp1\_27  
 Scan number: 48783  
 Protein: ORFL142W + NC\_006273.2[78726,79031]+ <unknown description>  
 Peptide score: 117.77  
 Method: FTMS; HCD

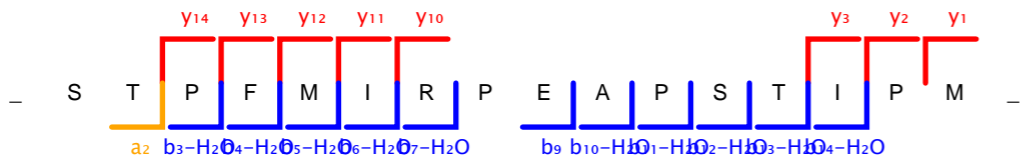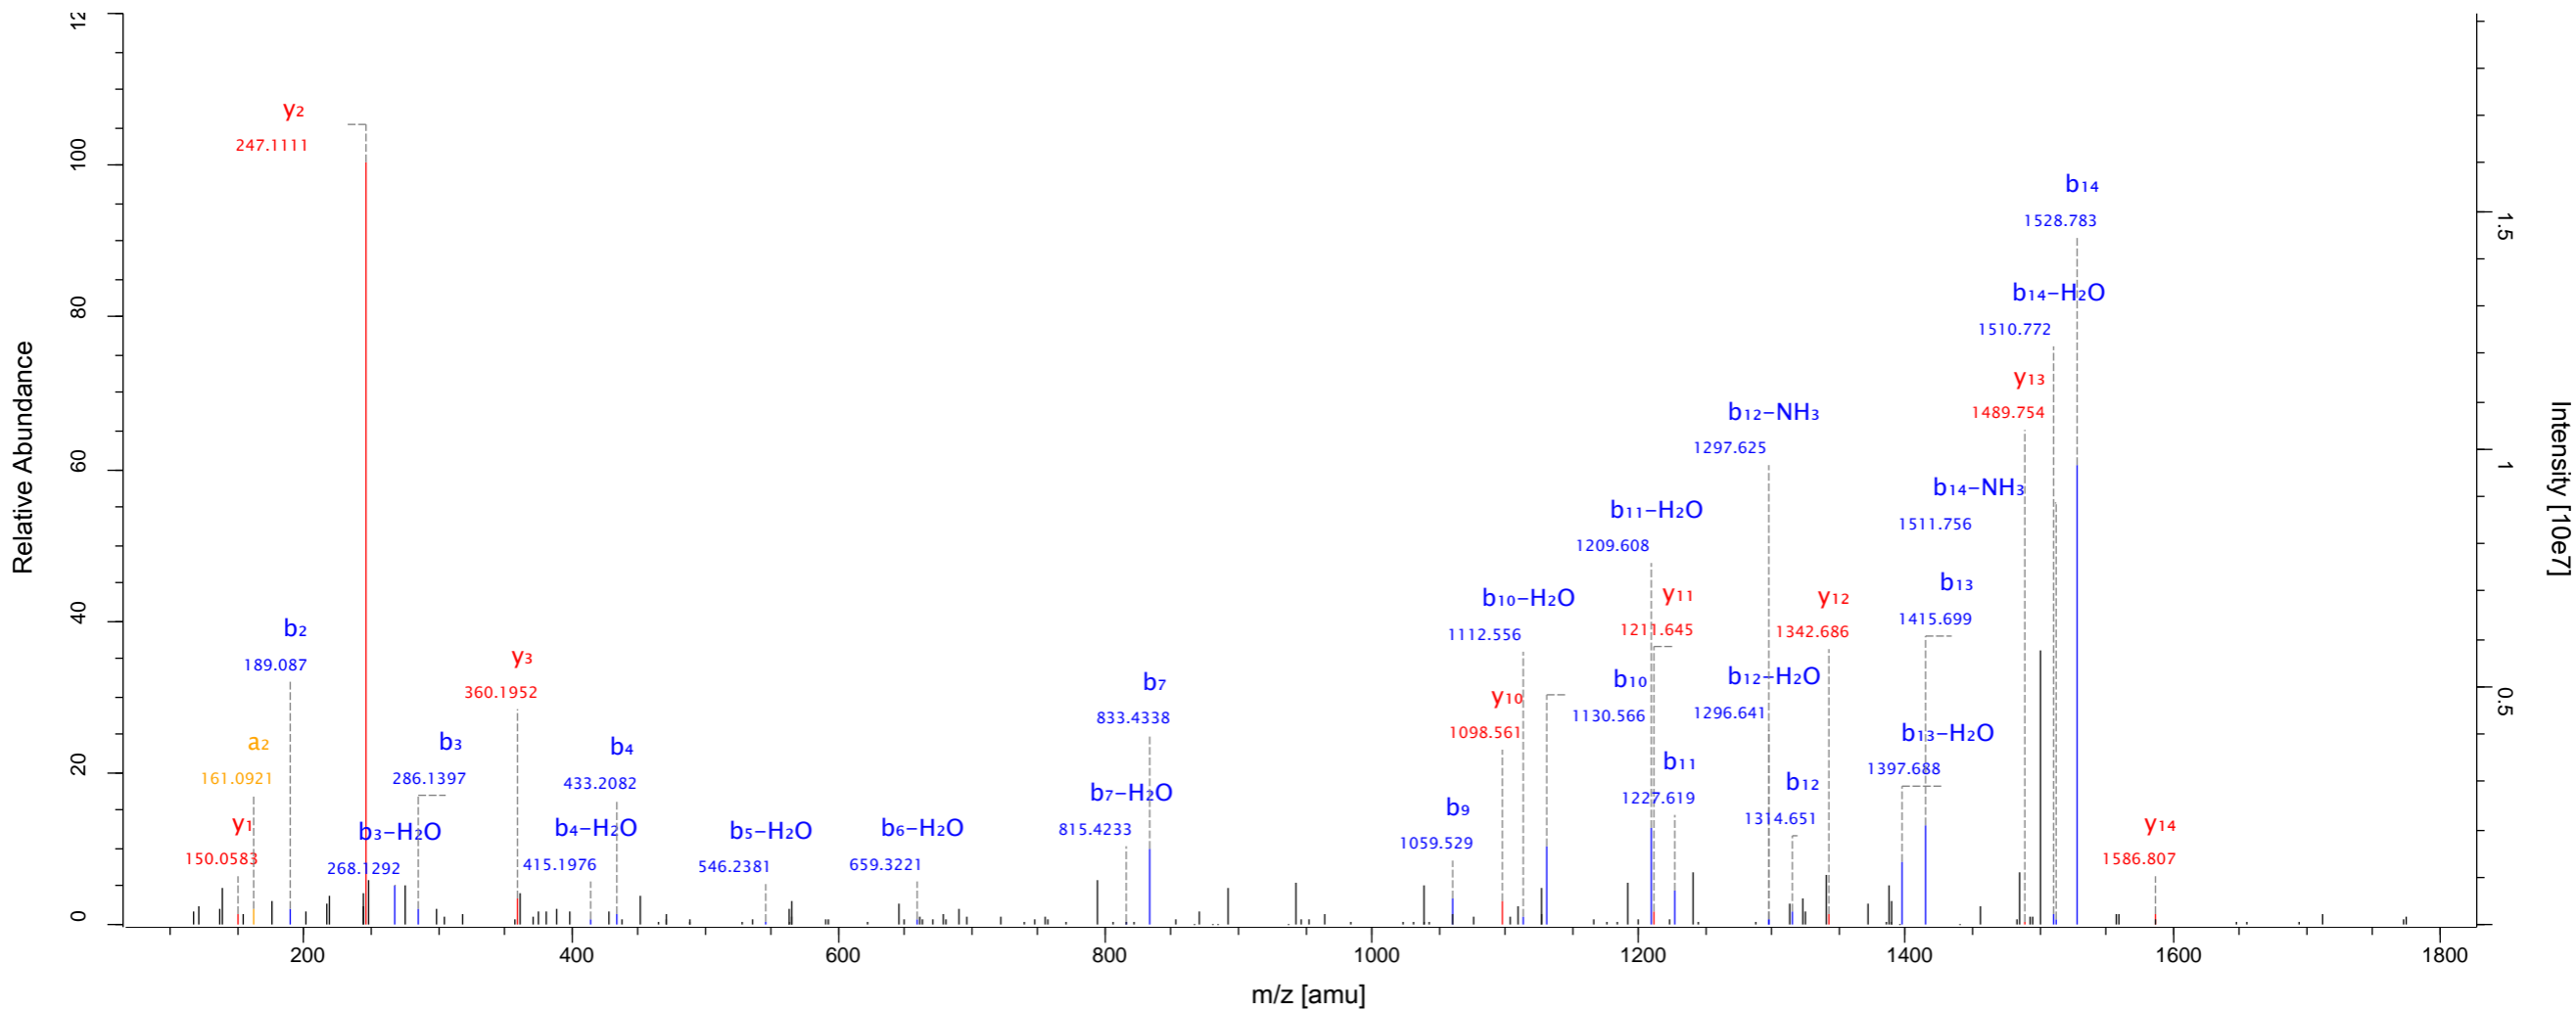

Raw file: 20111212\_EXQ5\_AnMi\_QC\_HCMVp1\_27  
 Scan number: 48877  
 Protein: ORFL174C.iORF2 - NC\_006273.2[106396,106770]- <unknown description>  
 Peptide score: 113.72  
 Method: FTMS; HCD

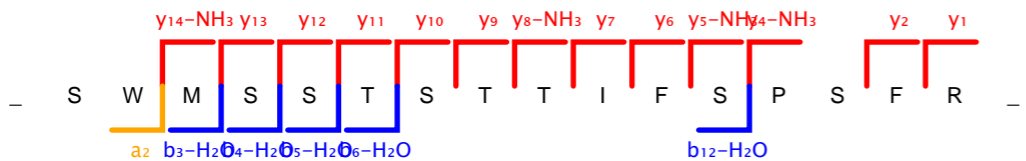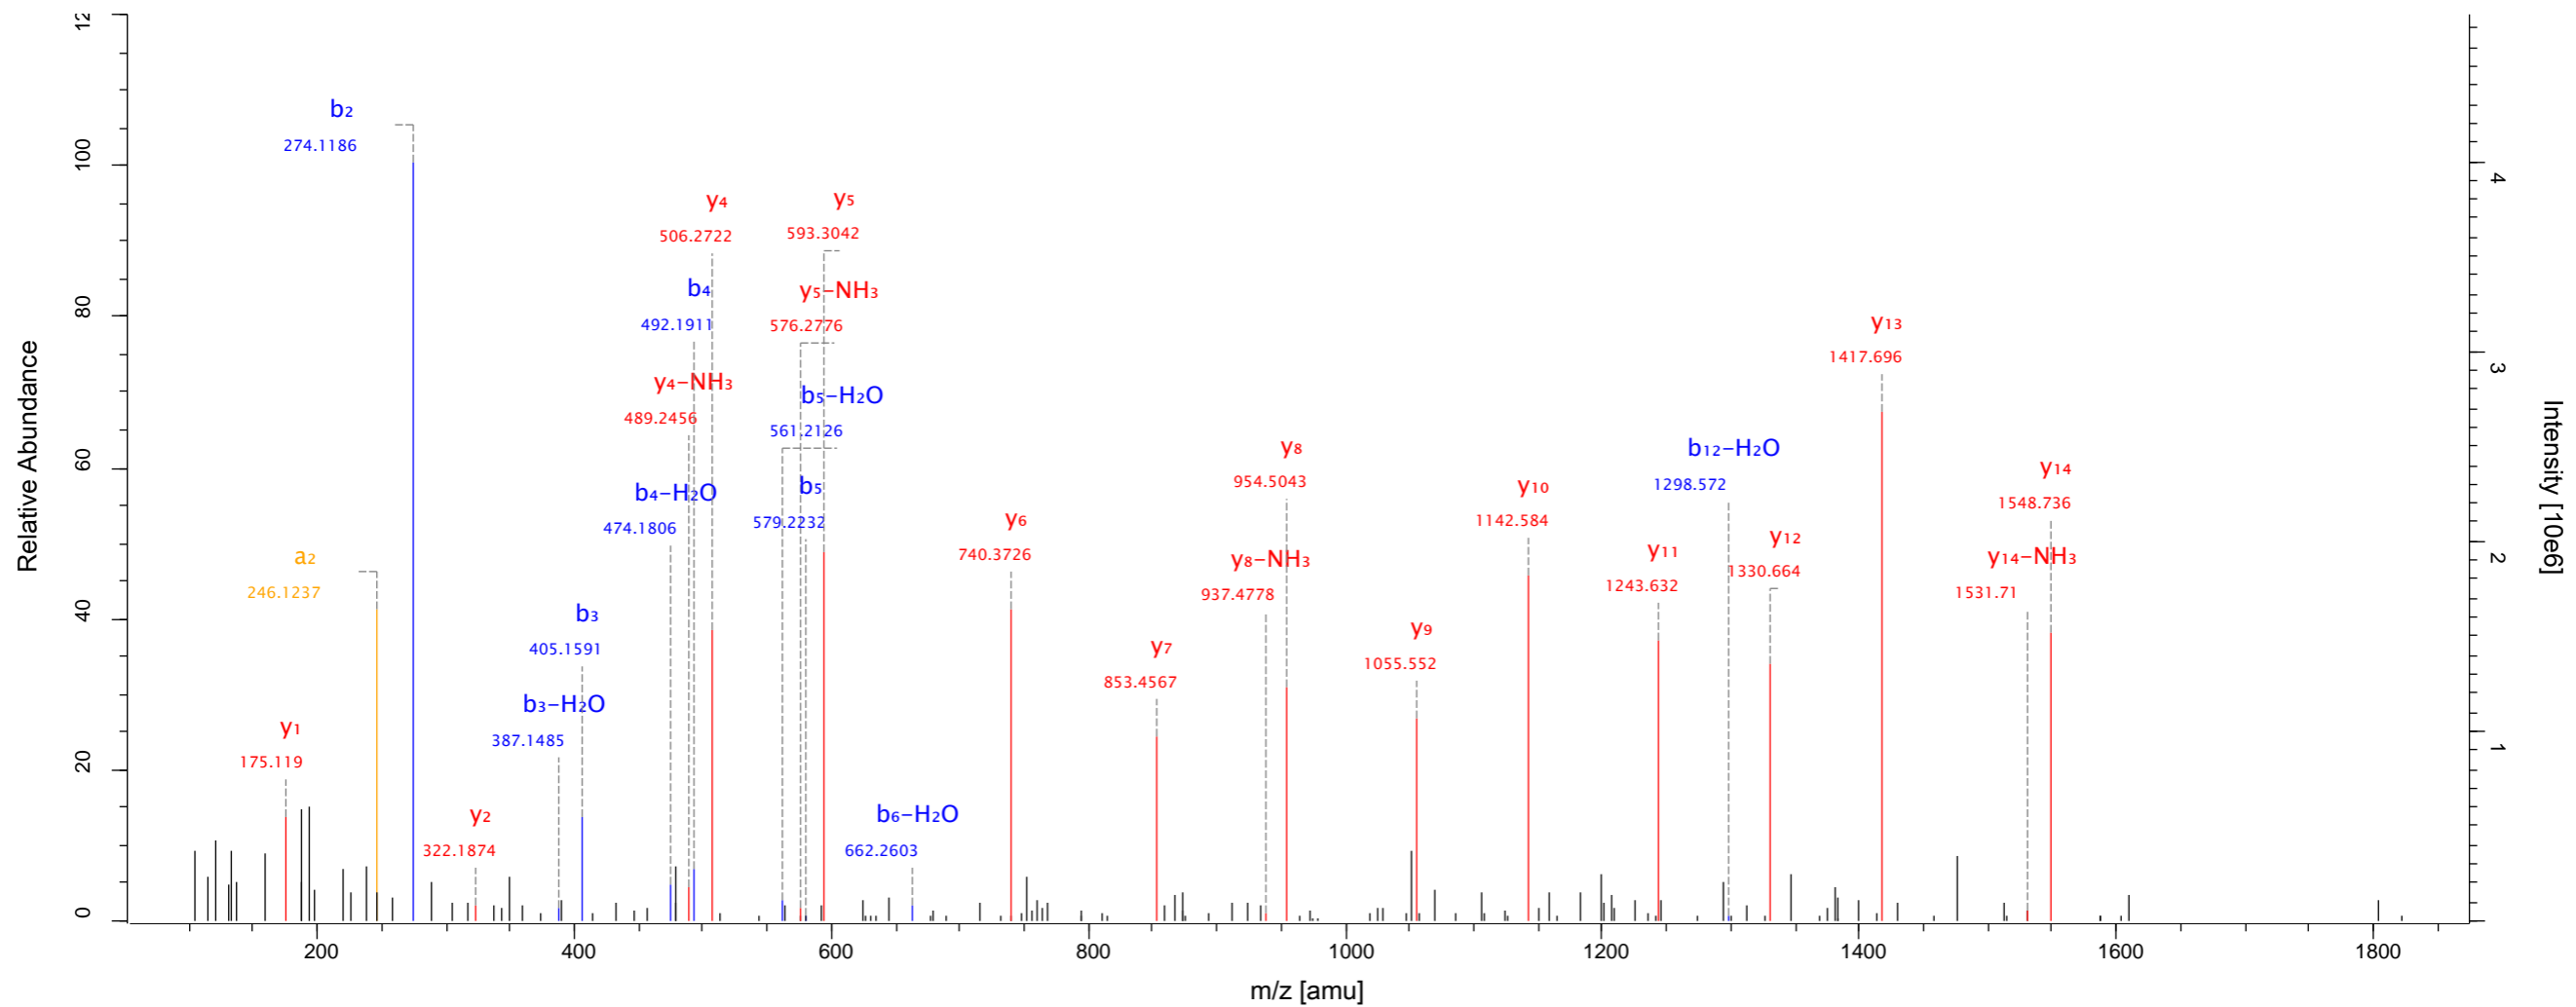

Raw file: 20111212\_EXQ5\_AnMi\_QC\_HCMVp1\_27  
 Scan number: 49026  
 Protein: ORFL294W.iORF1 + NC\_006273.2[183230,193441]+ <unknown description>; ORFL294W + NC\_006273.2[183230,193441]+ <unknown description>  
 Peptide score: 269.26  
 Method: FTMS; HCD

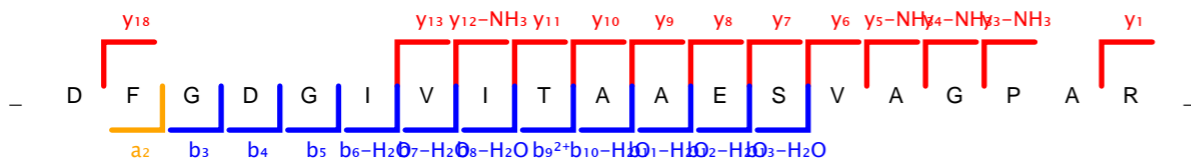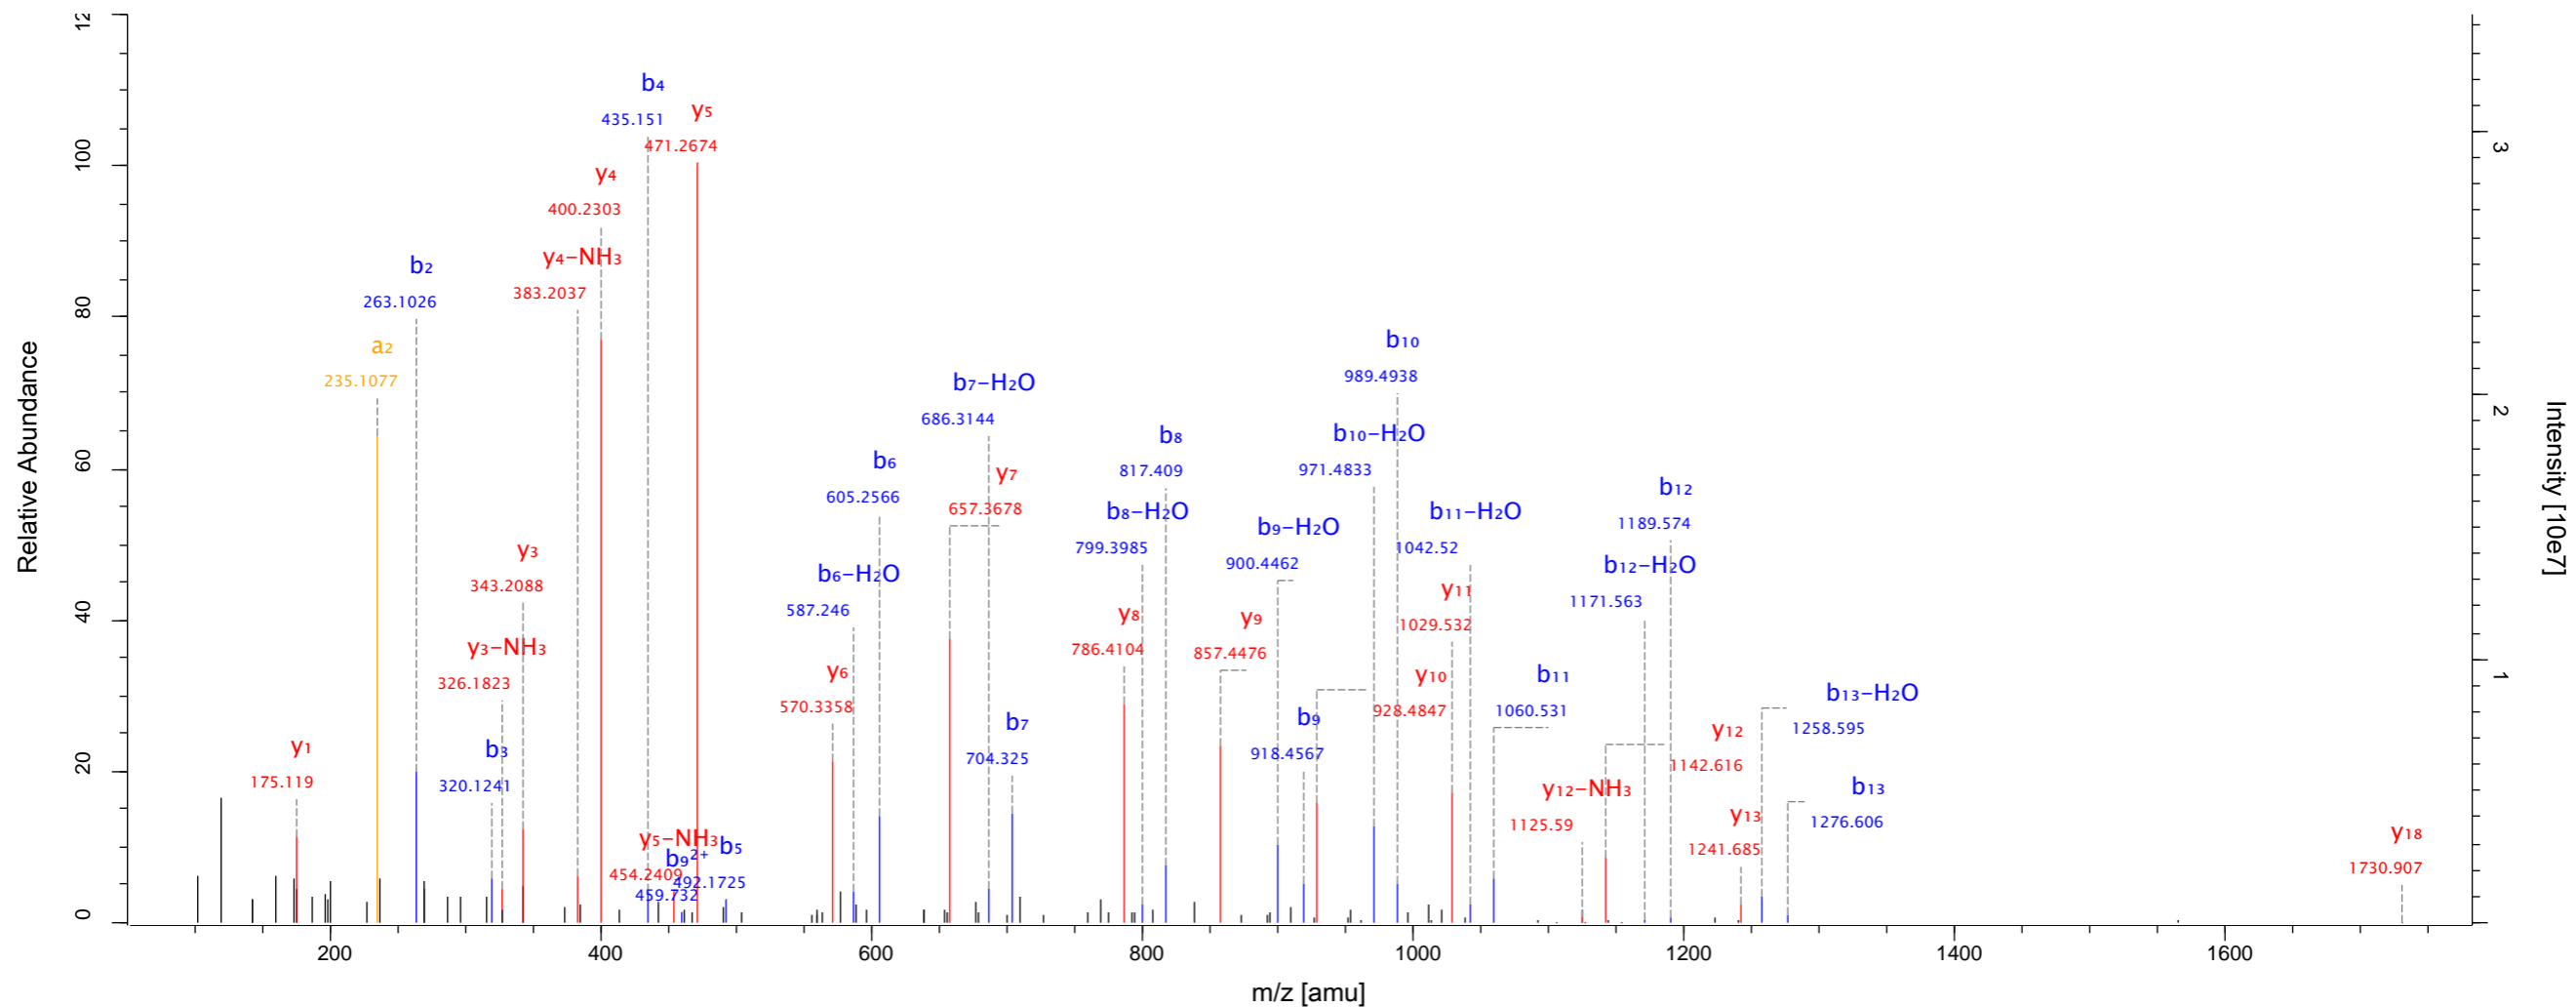

Raw file: 20111212\_EXQ5\_AnMi\_QC\_HCMVp1\_27  
 Scan number: 49212  
 Protein: ORFL294W.iORF1 + NC\_006273.2[183230,193441]+ <unknown description>; ORFL294W + NC\_006273.2[183230,193441]+ <unknown description>  
 Peptide score: 181.41  
 Method: FTMS; HCD

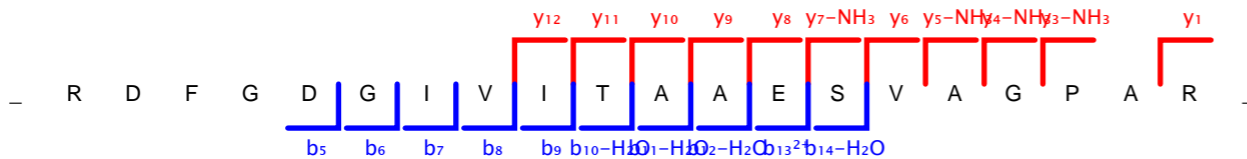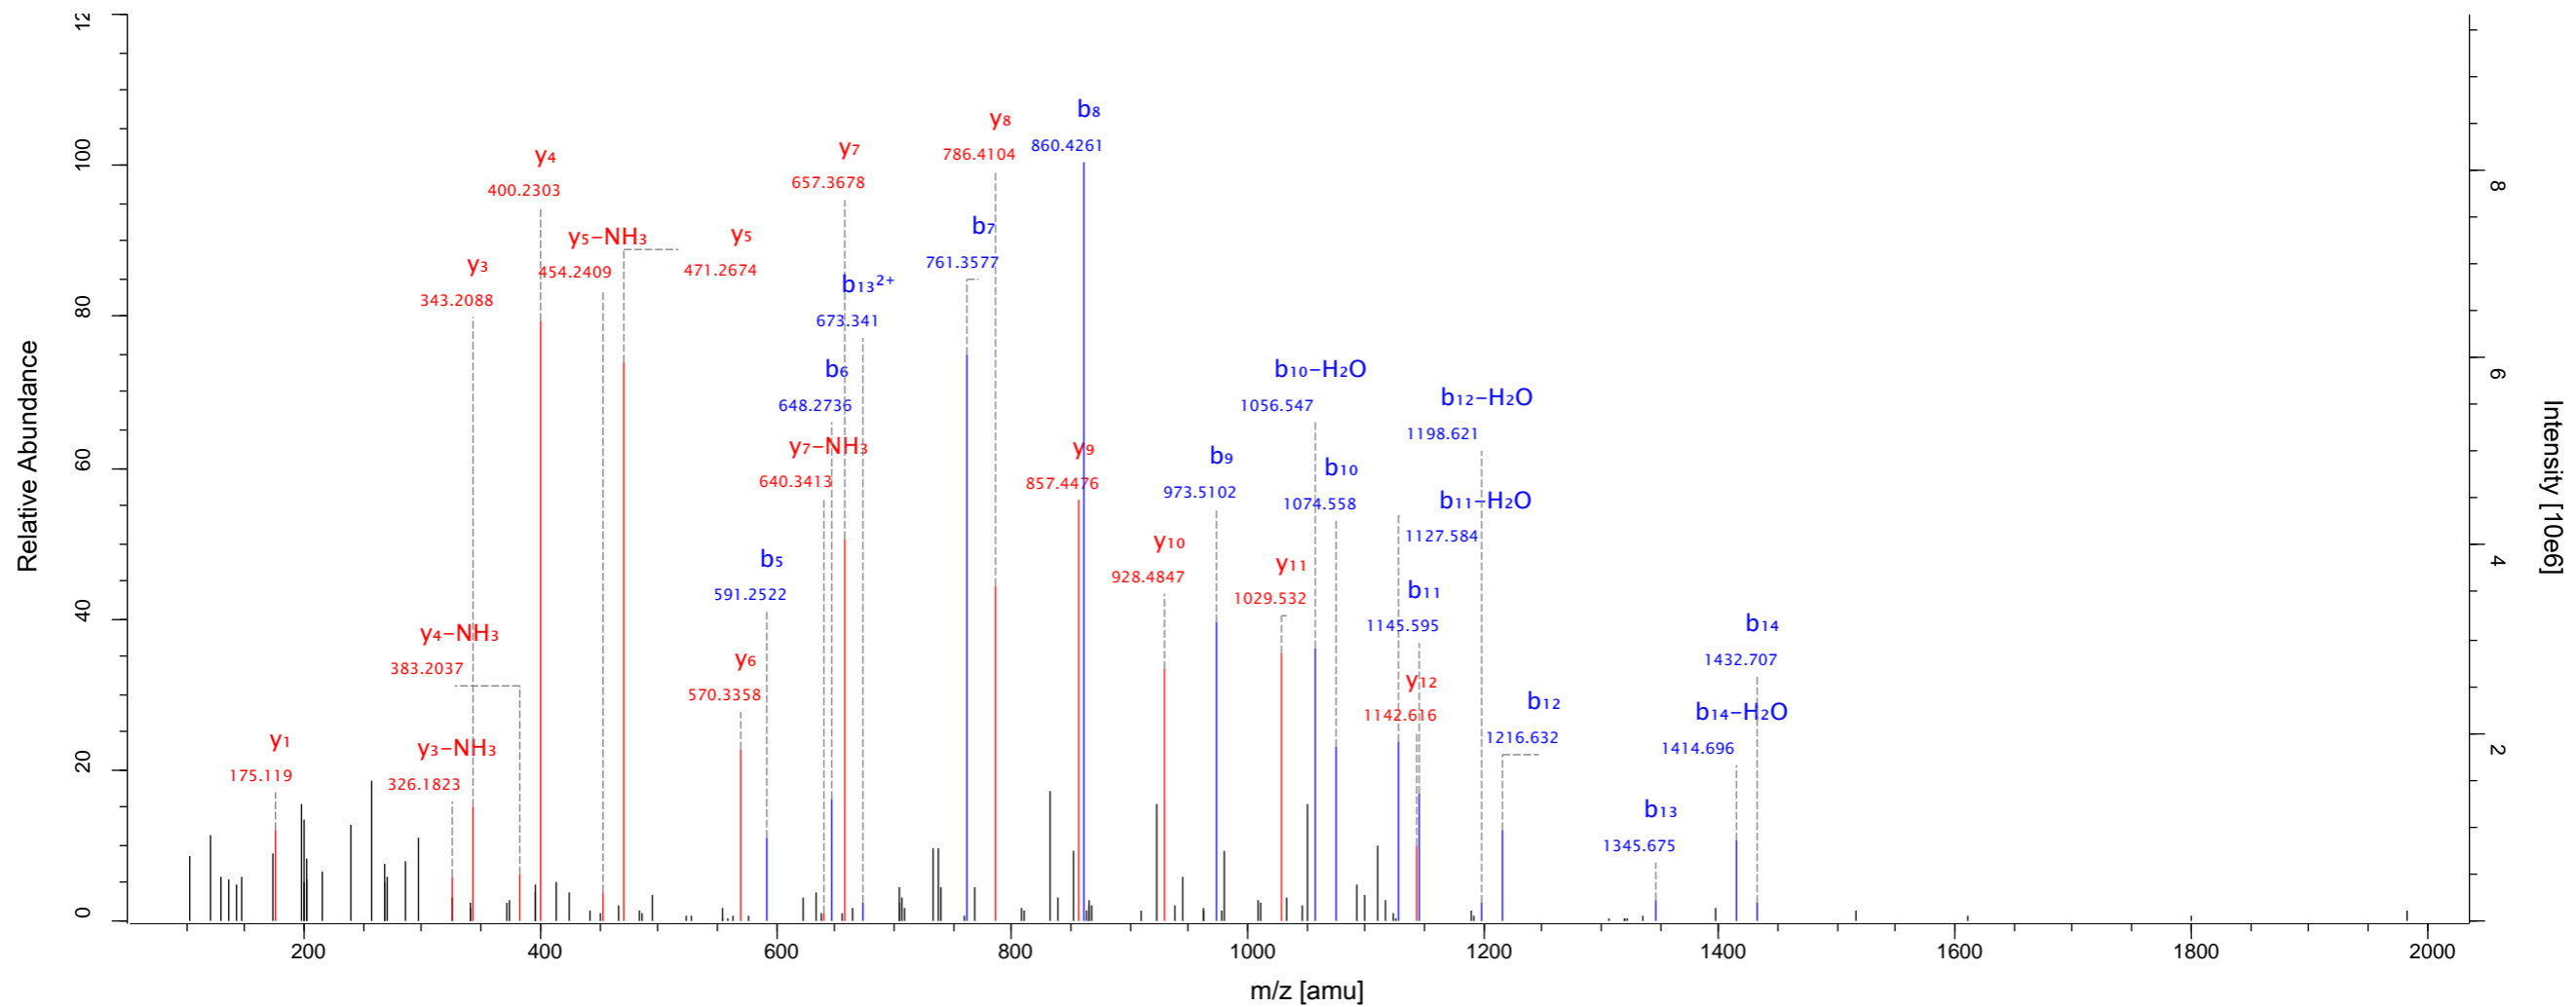

Raw file: 20111212\_EXQ5\_AnMi\_QC\_HCMVp11\_27  
 Scan number: 49325  
 Protein: ORFL174C.iORF2 - NC\_006273.2[106396,106770]- <unknown description>  
 Peptide score: 167.18  
 Method: FTMS; HCD

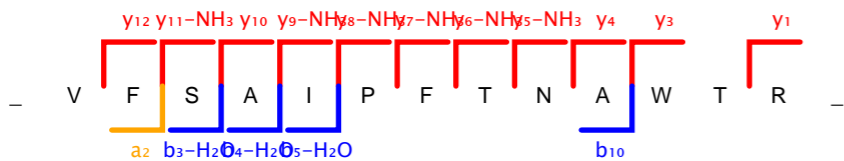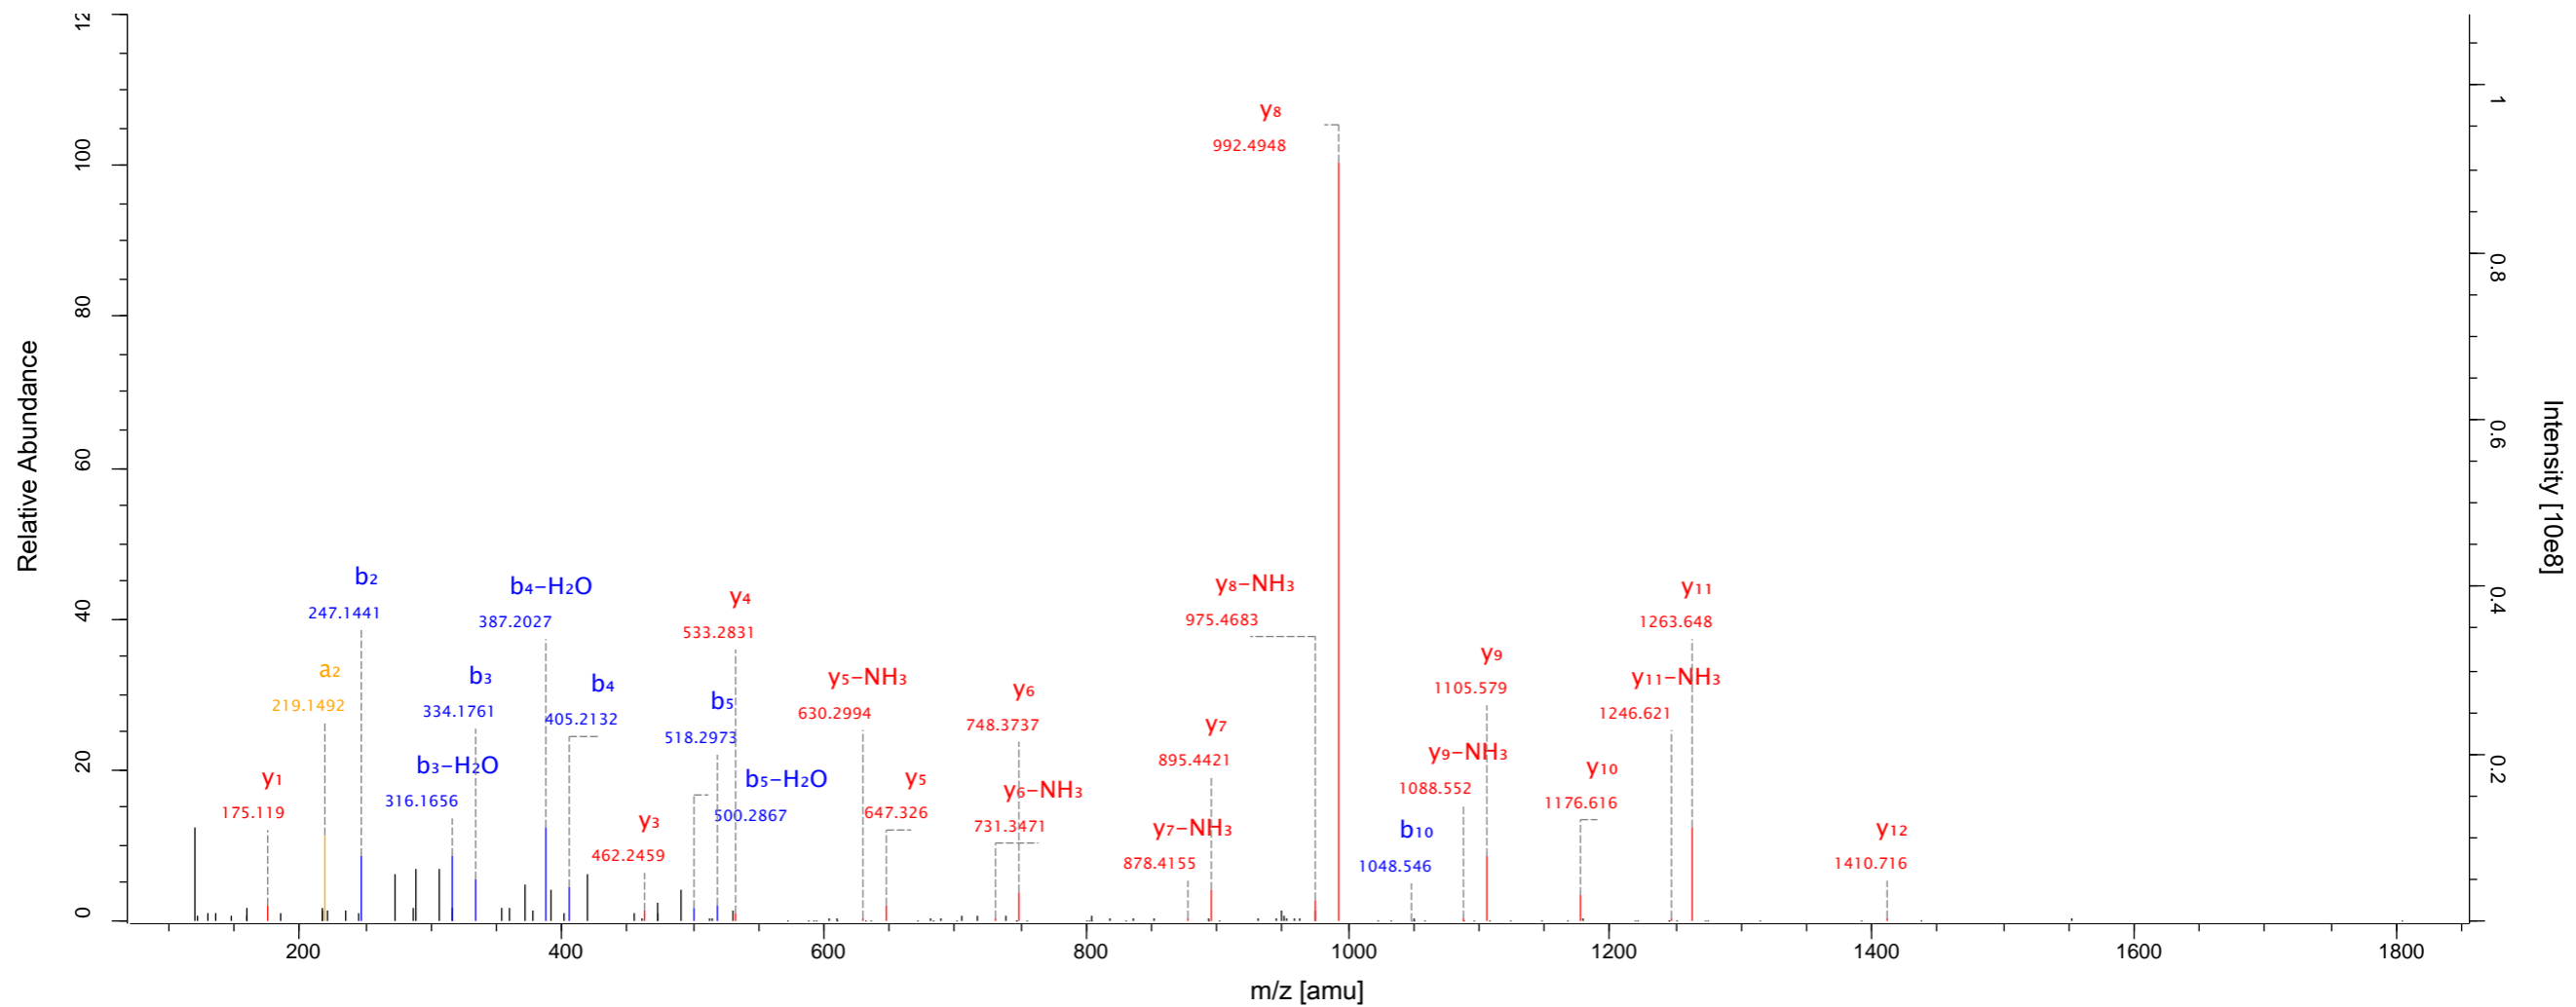



Raw file: 20111212\_EXQ5\_AnMi\_QC\_HCMVp1\_27  
Scan number: 49357  
Protein: ORFL161C.iORF2 - NC\_006273.2[101063,101479]- <unknown description>  
Peptide score: 62.94  
Method: FTMS; HCD

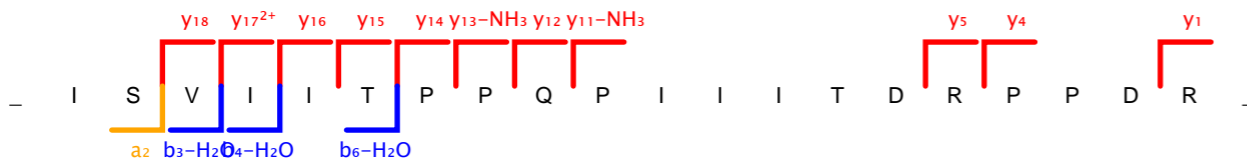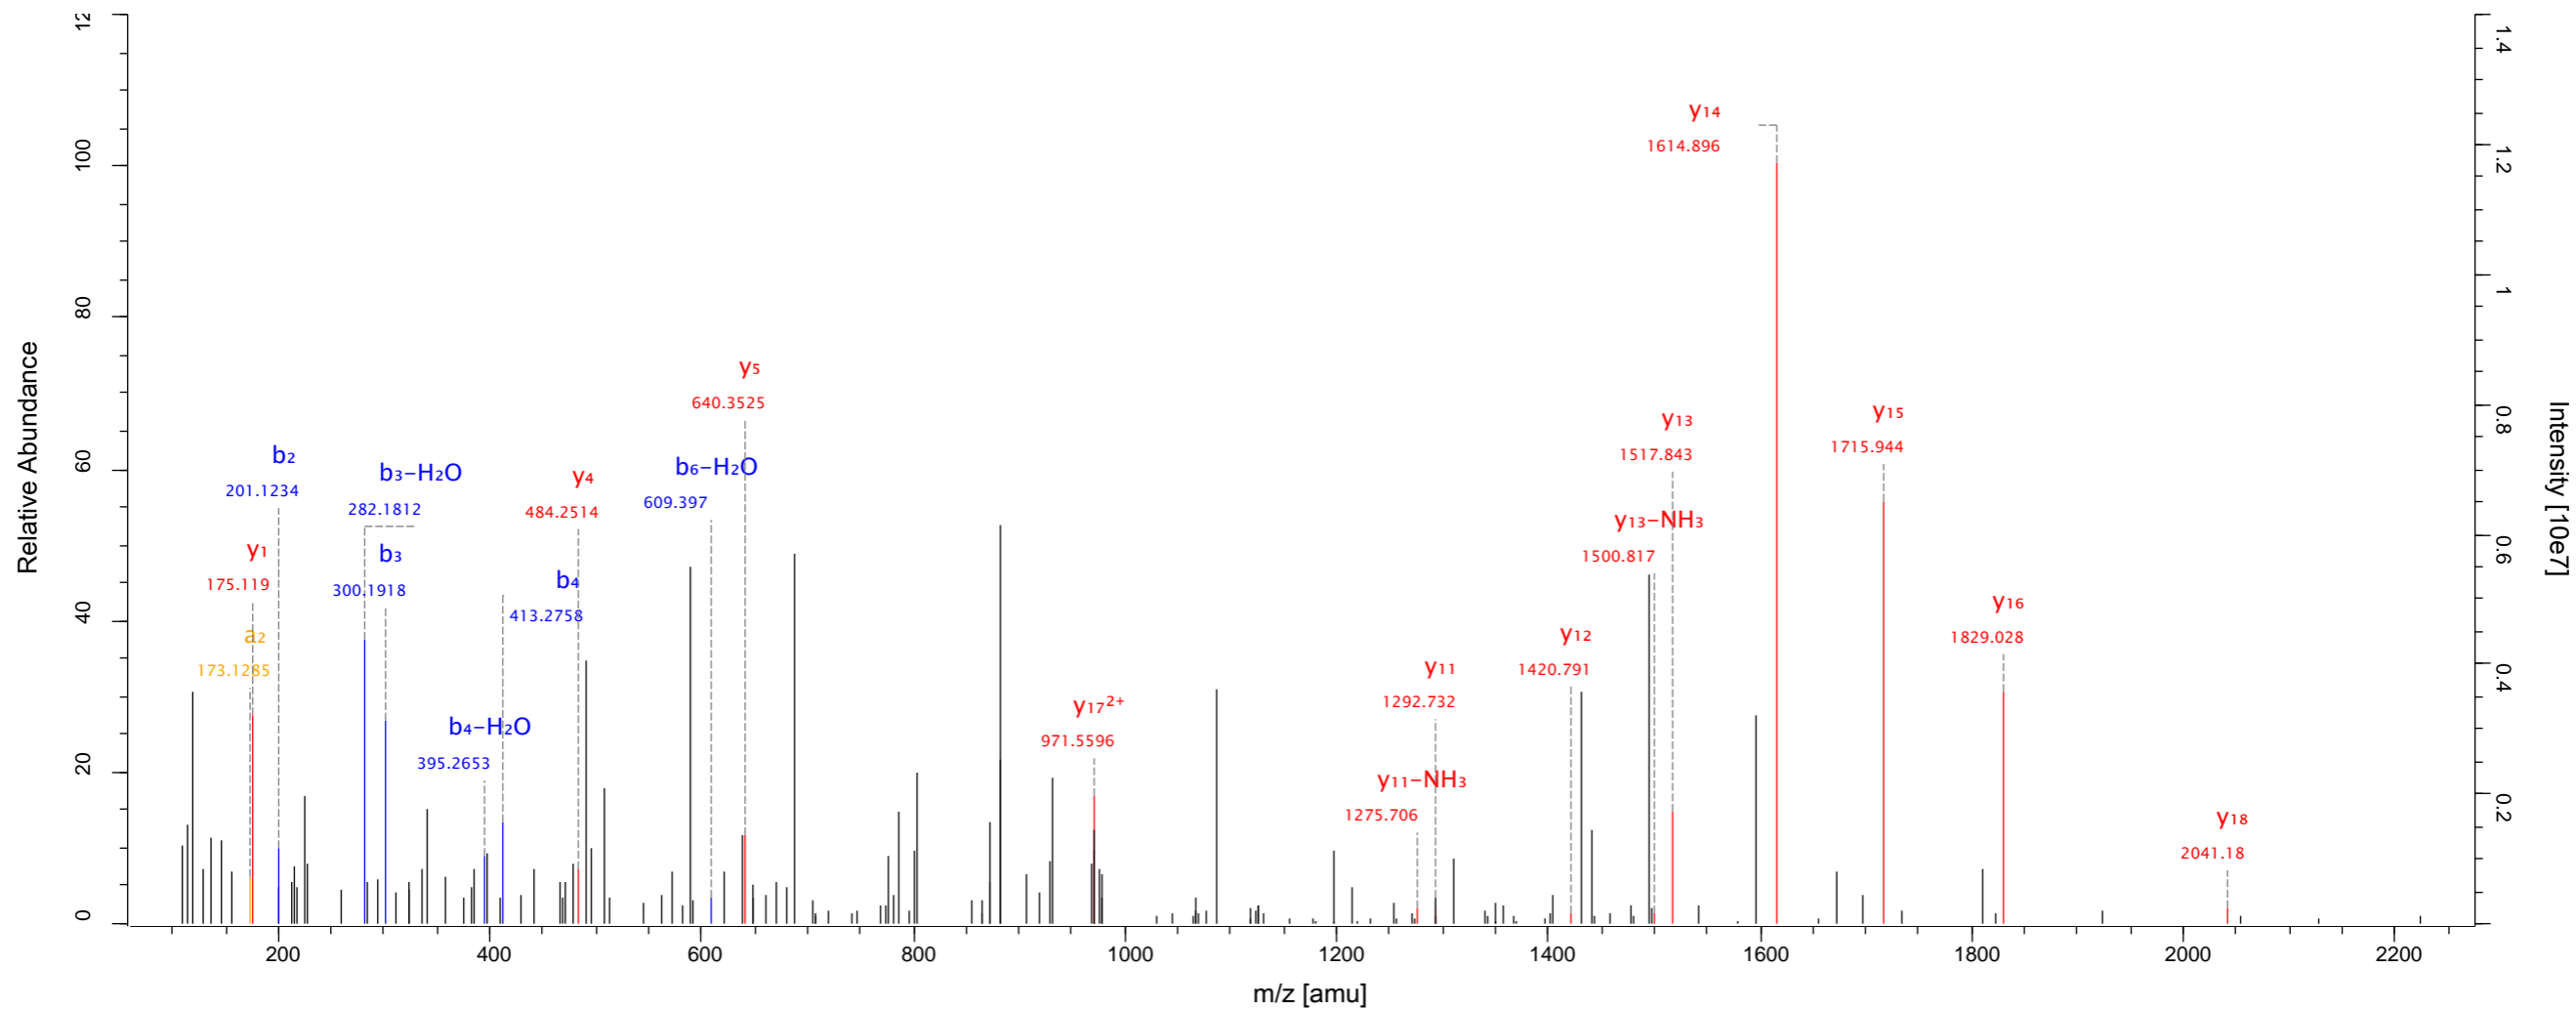

Raw file: 20111212\_EXQ5\_AnMi\_QC\_HCMVp1\_27

Scan number: 49926

Protein: ORFL321W + NC\_006273.2[191968,194126]+ <unknown description>; ORFL321W.iORF1 + NC\_006273.2[191968,194126]+ <unknown description>; ORFL321W.iORF4 + NC\_006273.2[193200,194126]+ <unknown description>

Peptide score: 158.3

Method: FTMS; HCD

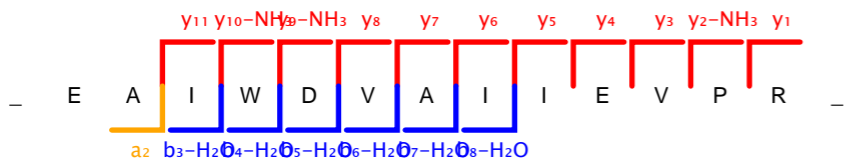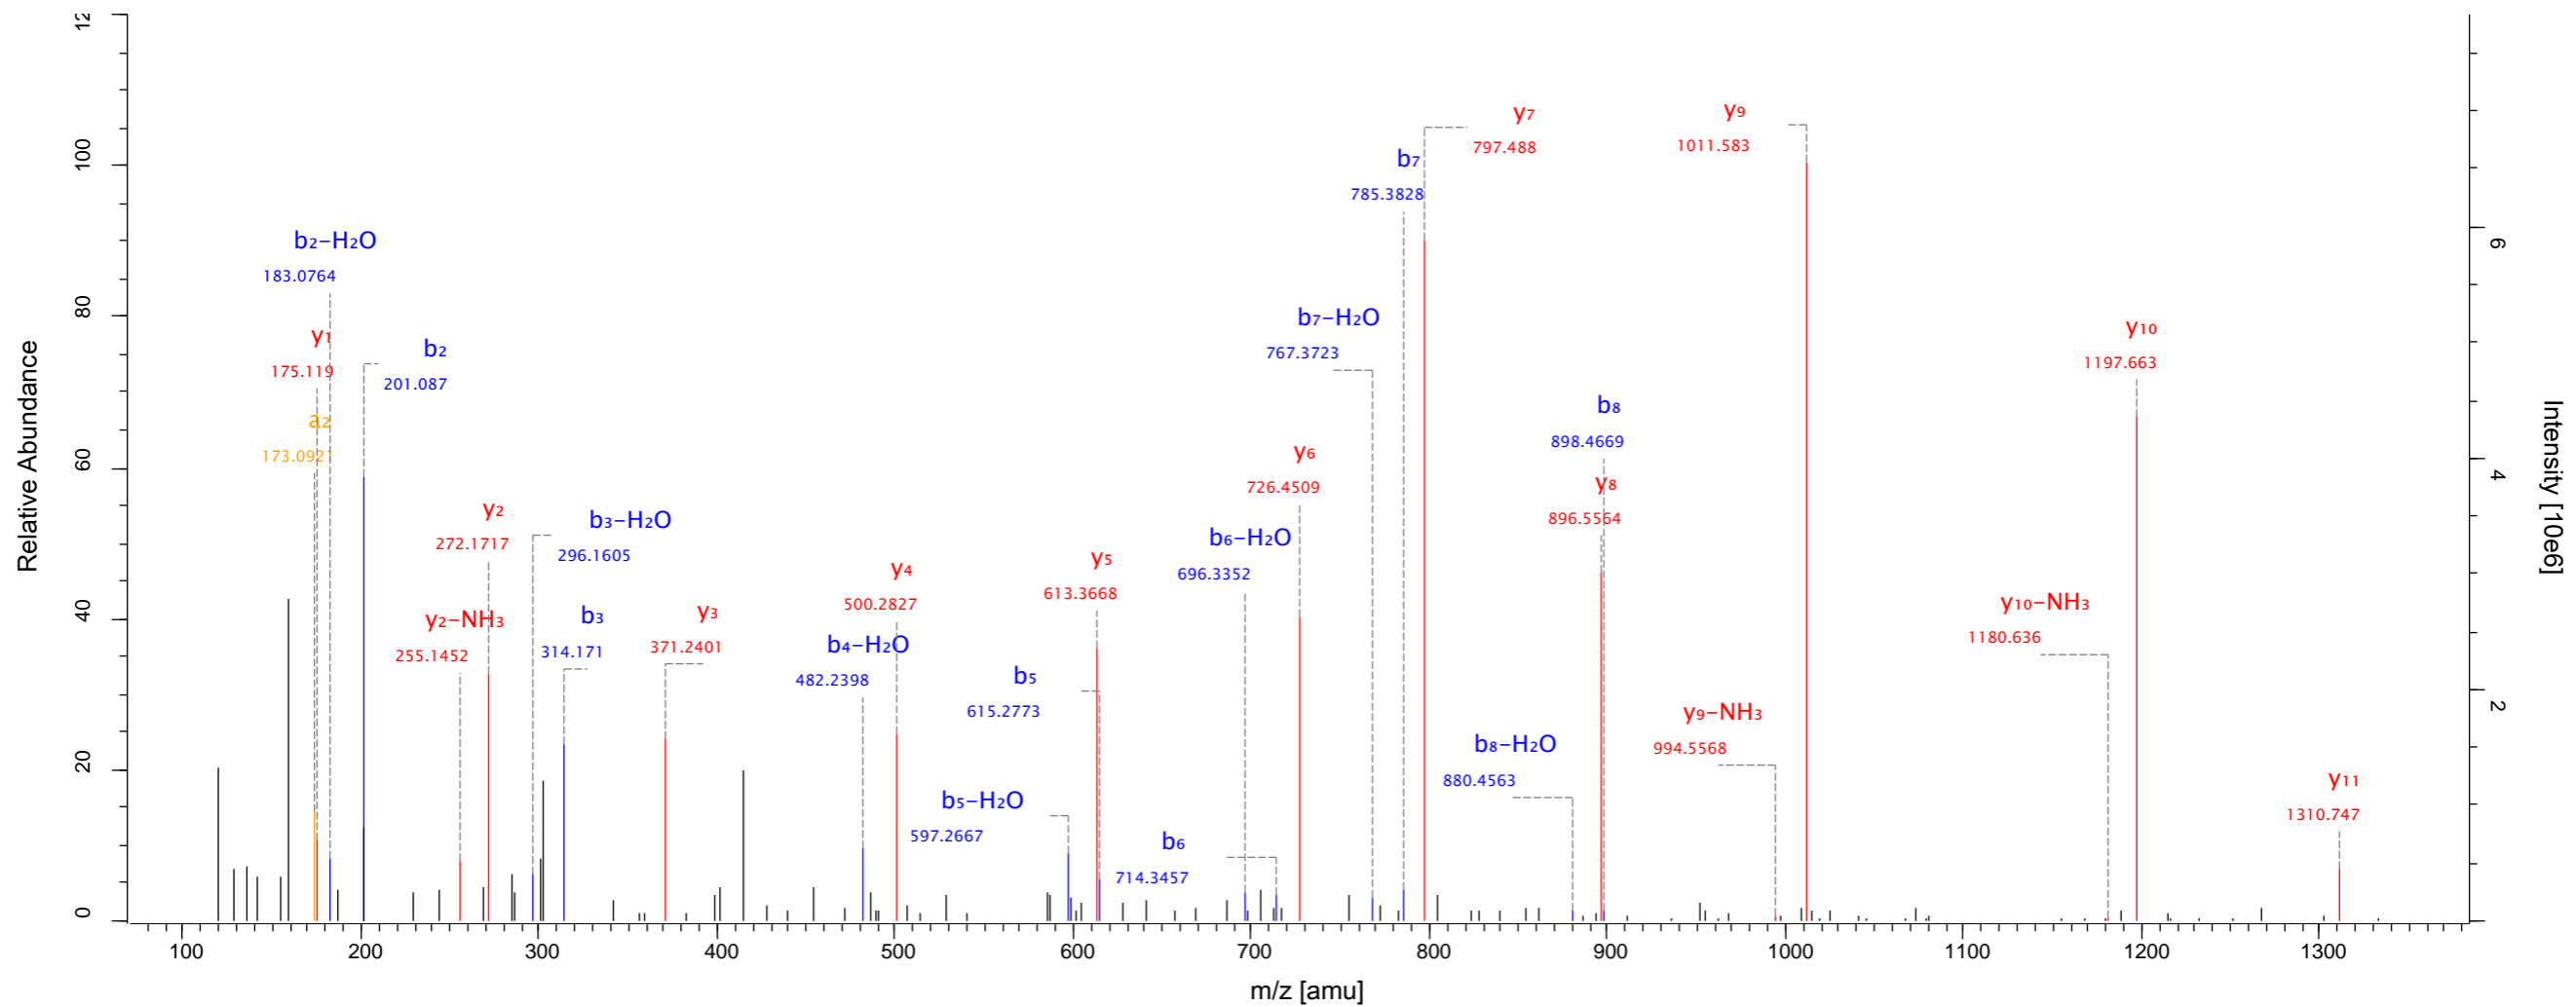

Raw file: 20111212\_EXQ5\_AnMi\_QC\_HCMVp1\_27  
Scan number: 50380  
Protein: ORFL161C.iORF2 - NC\_006273.2[101063,101479]- <unknown description>  
Peptide score: 195.39  
Method: FTMS; HCD

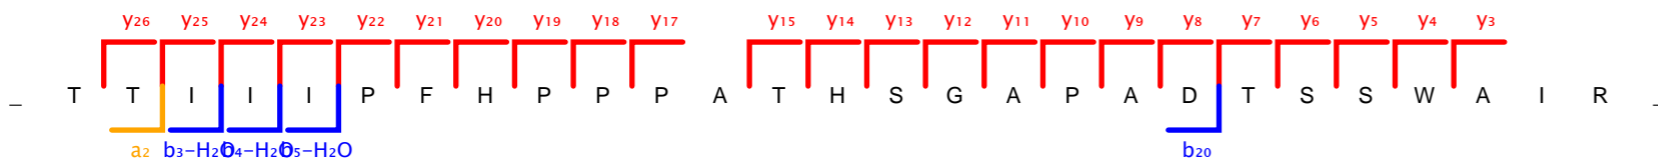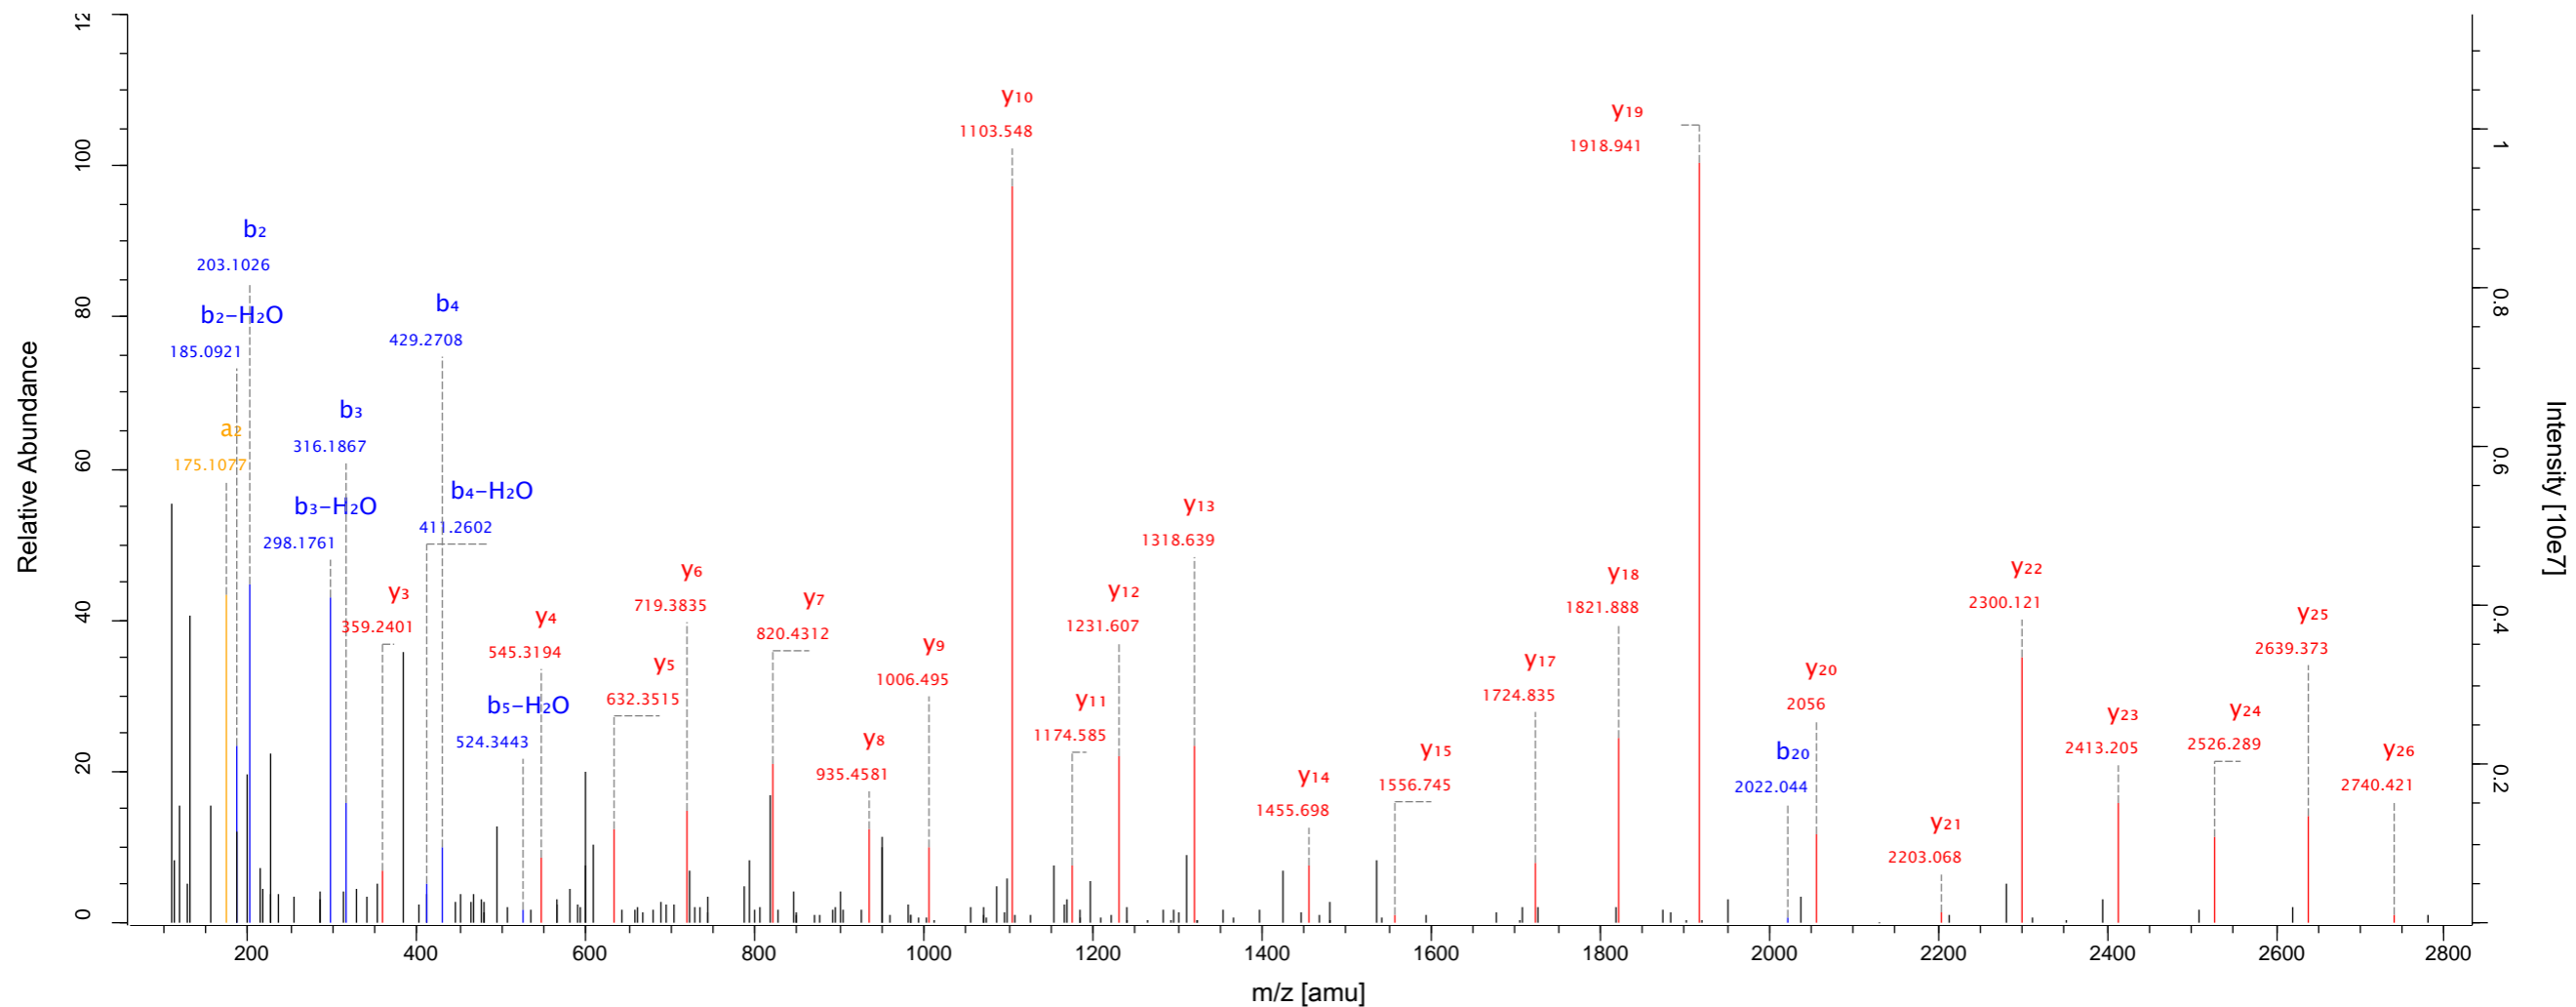

Raw file: 20111212\_EXQ5\_AnMi\_QC\_HCMVp1\_27  
Scan number: 5988  
Protein: ORFL142W + NC\_006273.2[78726,79031]+ <unknown description>  
Peptide score: 66.43  
Method: FTMS; HCD

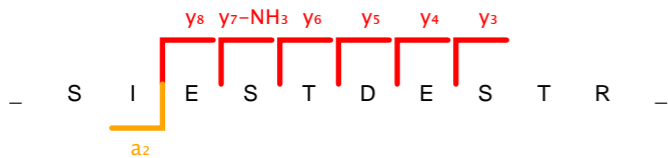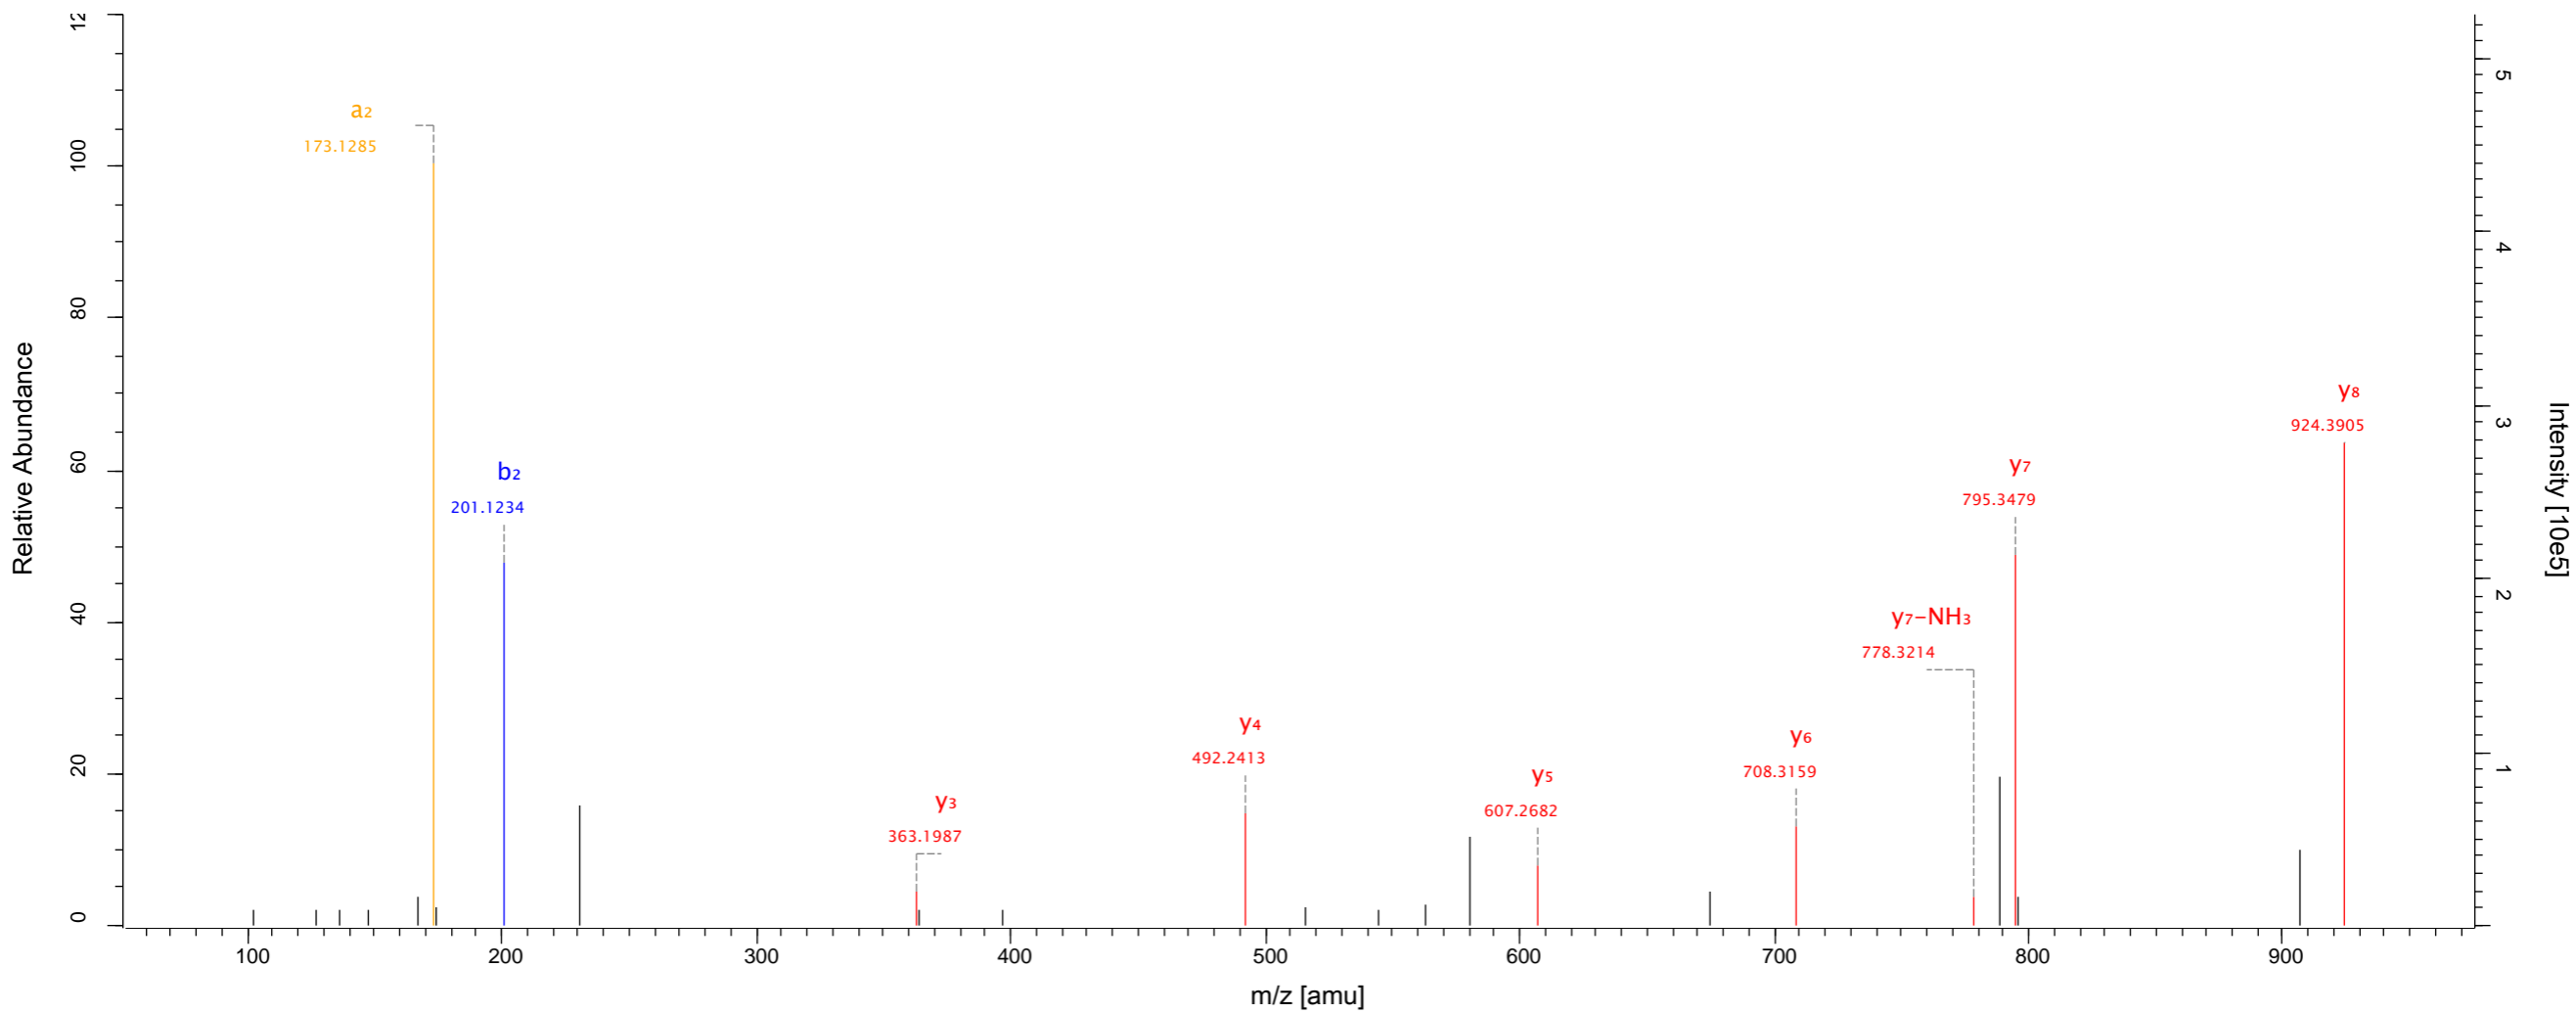

Raw file: 20111212\_EXQ5\_AnMi\_QC\_HCMVp11\_27  
Scan number: 6073  
Protein: ORFL185C - NC\_006273.2[111134,111490]- <unknown description>  
Peptide score: 82.42  
Method: FTMS; HCD

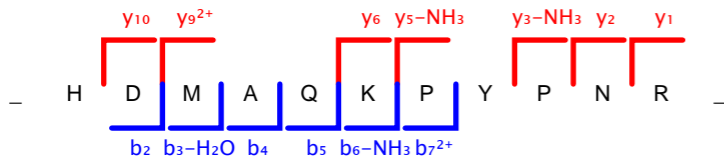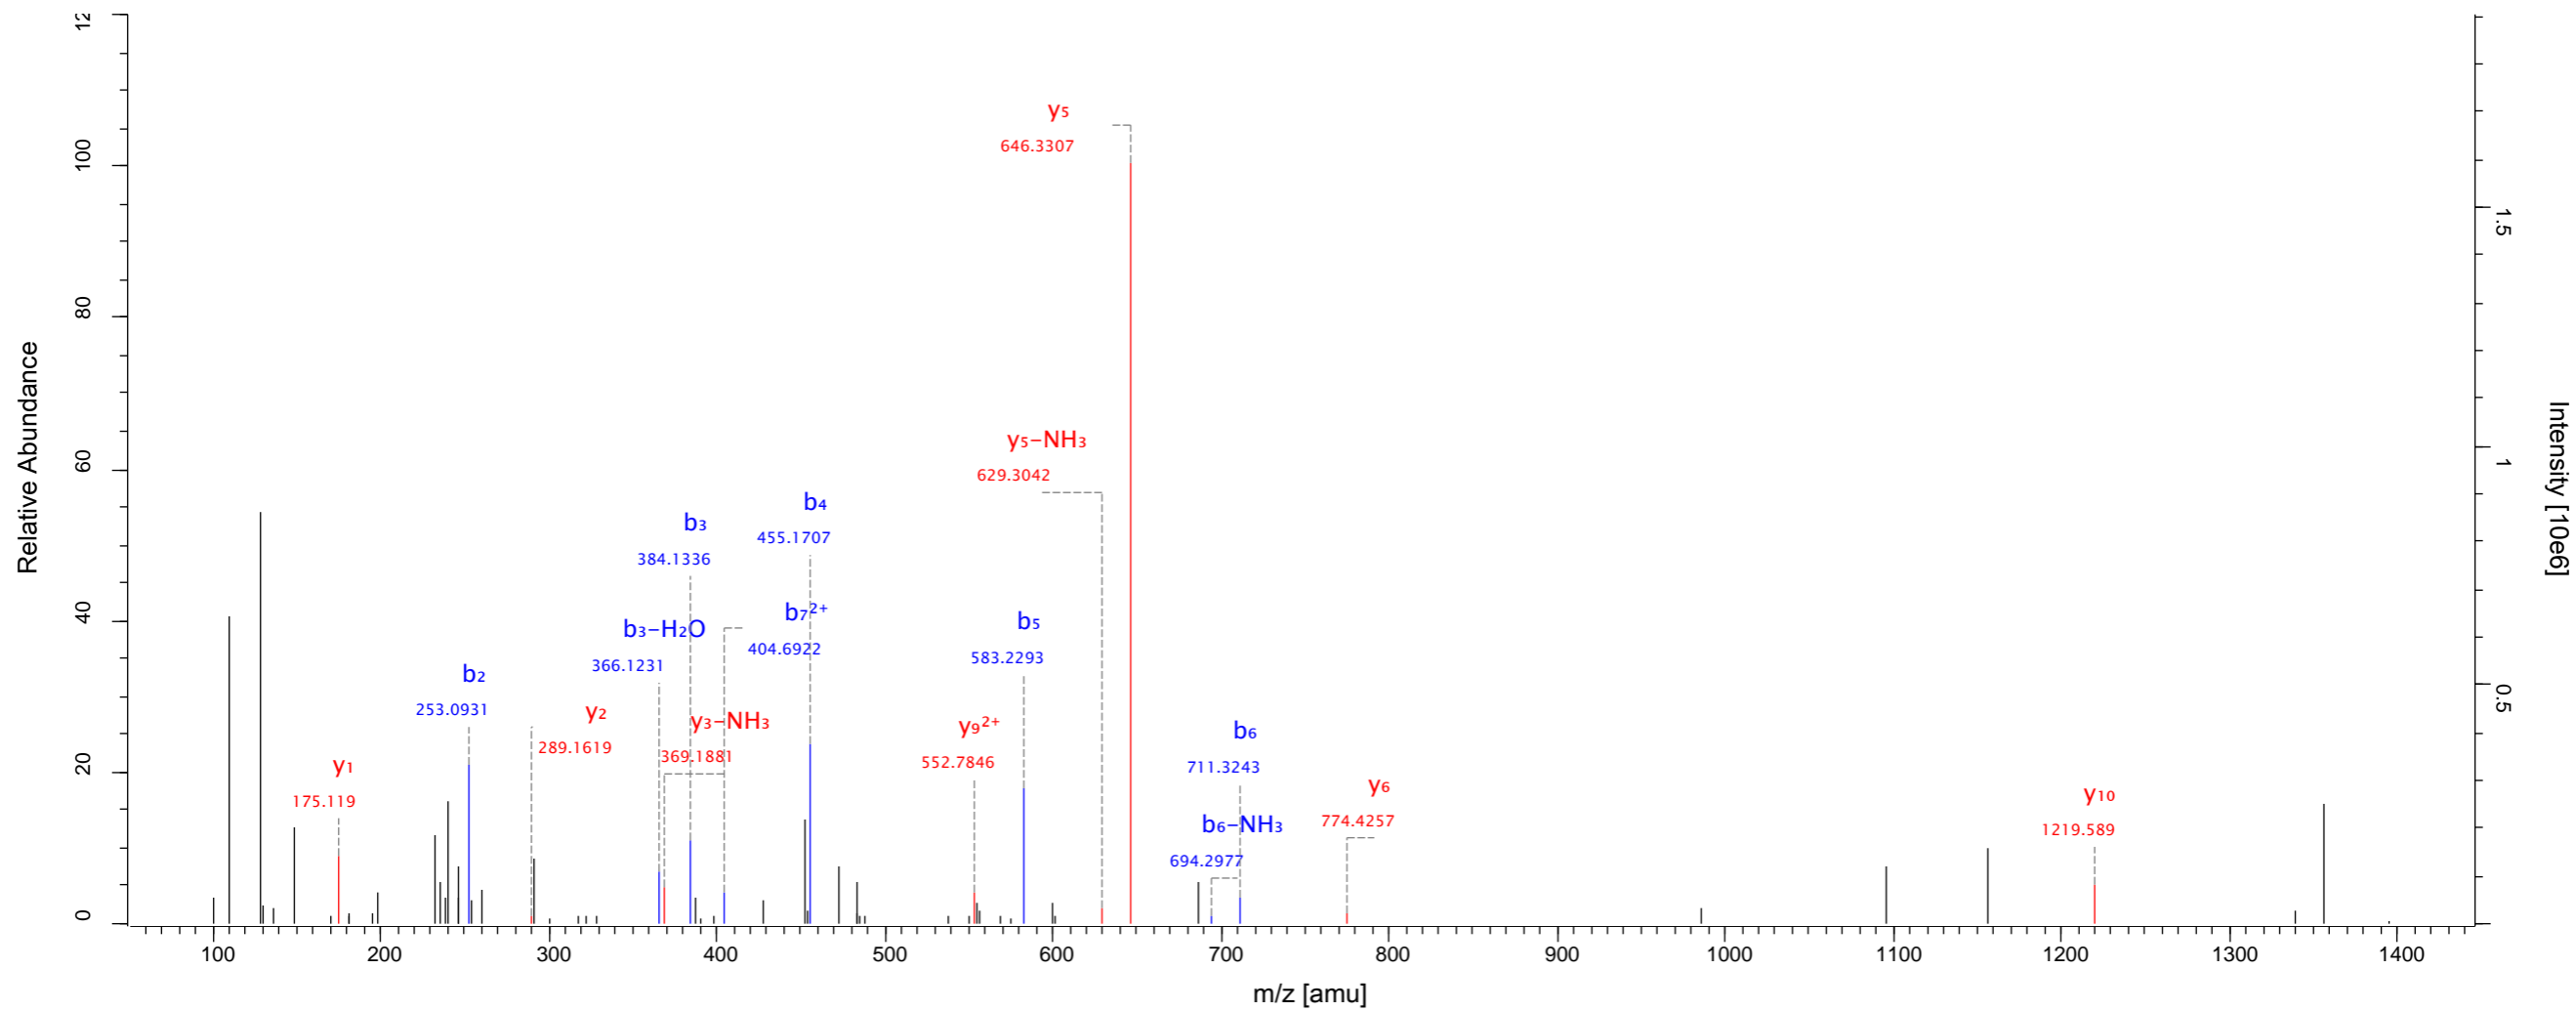

Raw file: 20111212\_EXQ5\_AnMi\_QC\_HCMVp1\_27  
Scan number: 6920  
Protein: ORFL301C - NC\_006273.2[185358,185666]- <unknown description>  
Peptide score: 80.76  
Method: FTMS; HCD

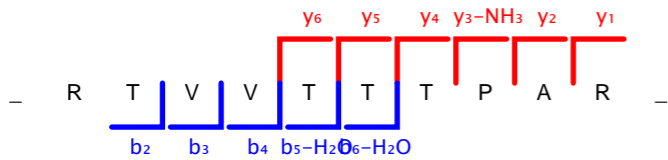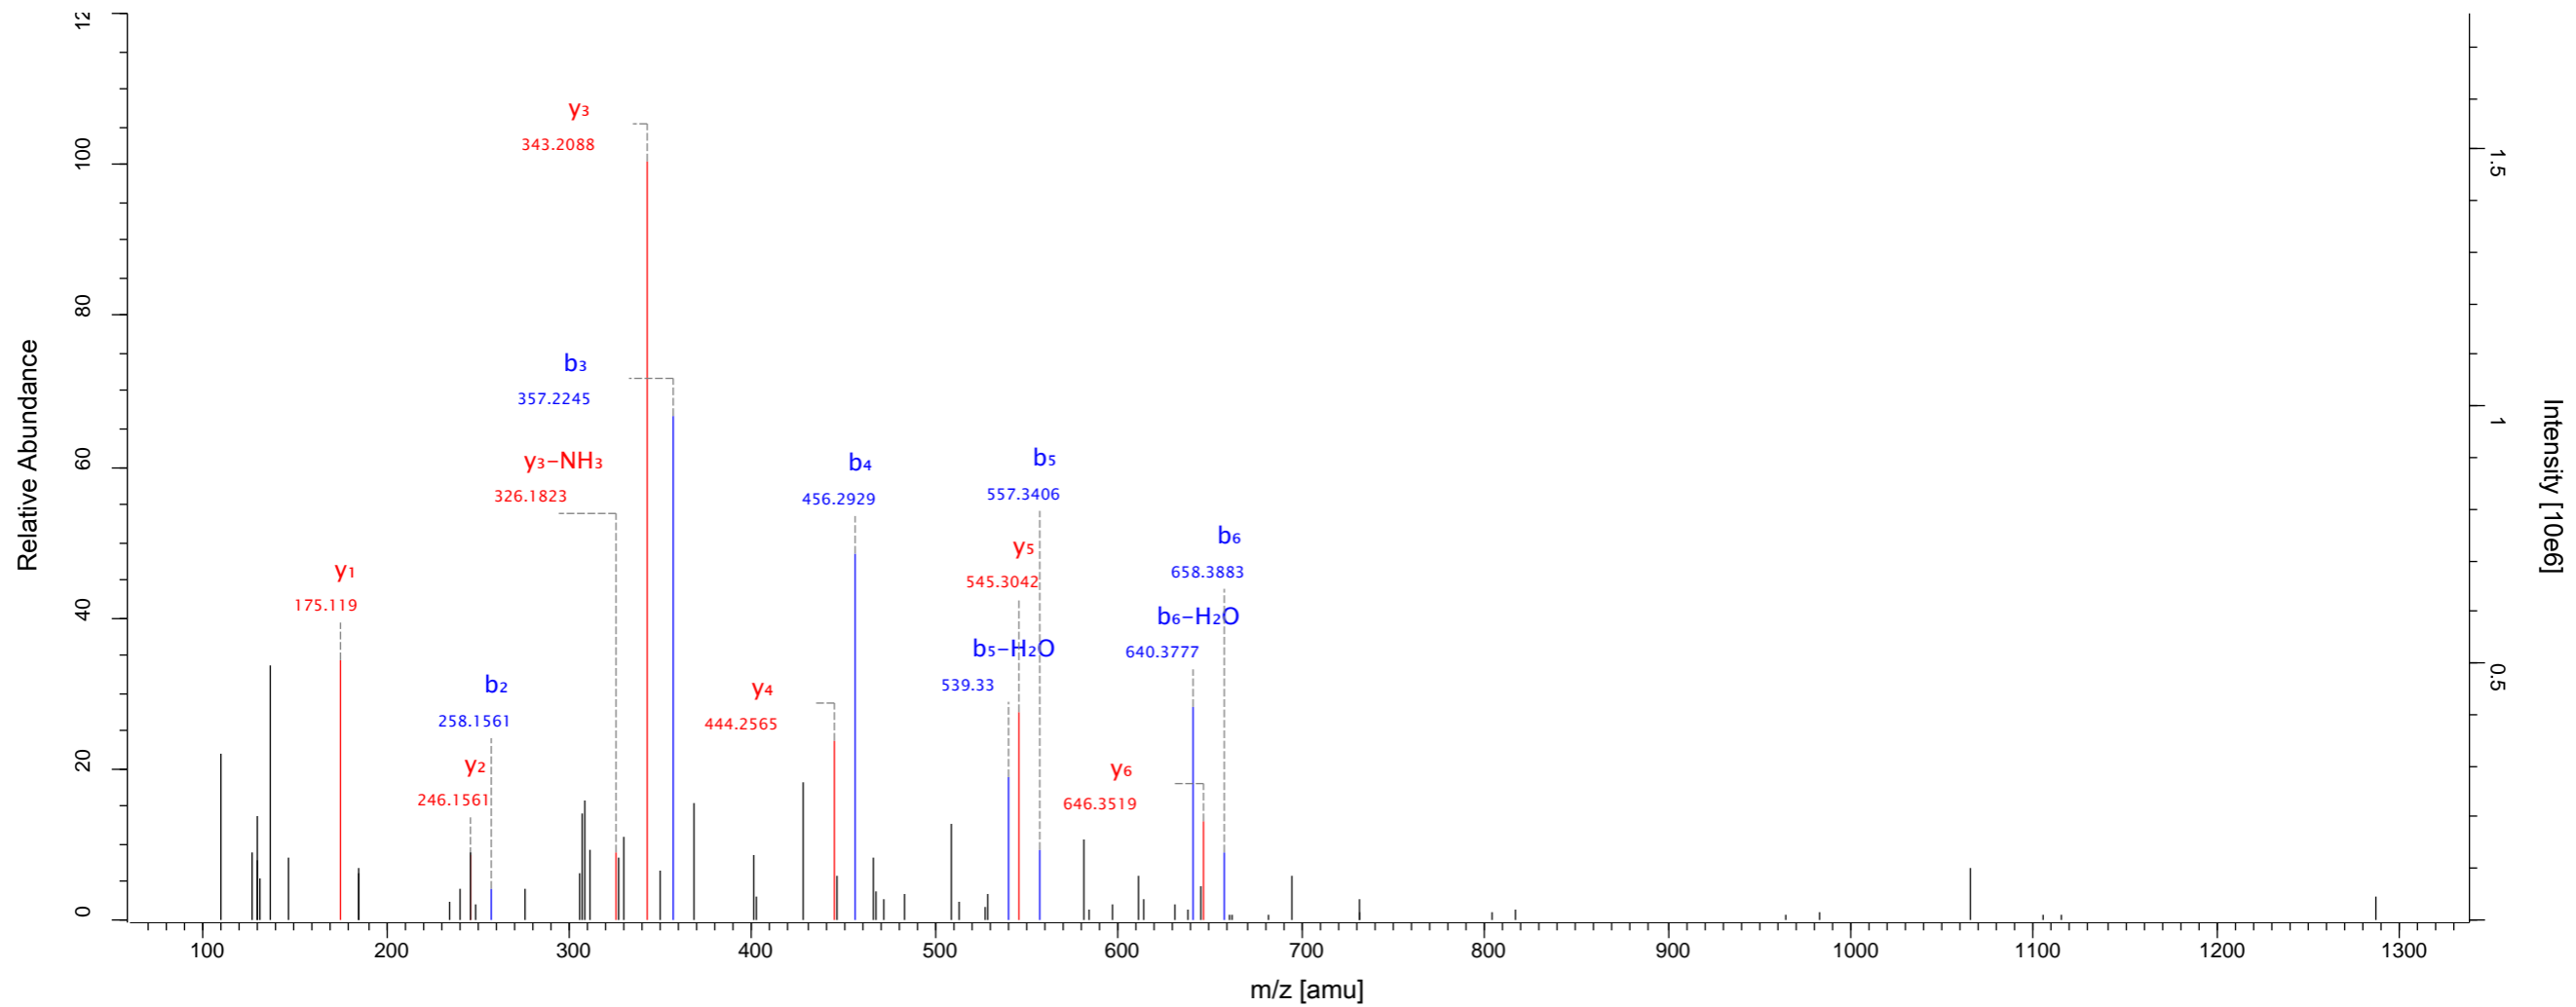

Raw file: 20111212\_EXQ5\_AnMi\_QC\_HCMVp11\_27  
Scan number: 8015  
Protein: ORFL301C - NC\_006273.2[185358,185666]- <unknown description>  
Peptide score: 80.24  
Method: FTMS; HCD

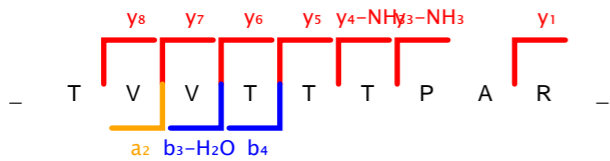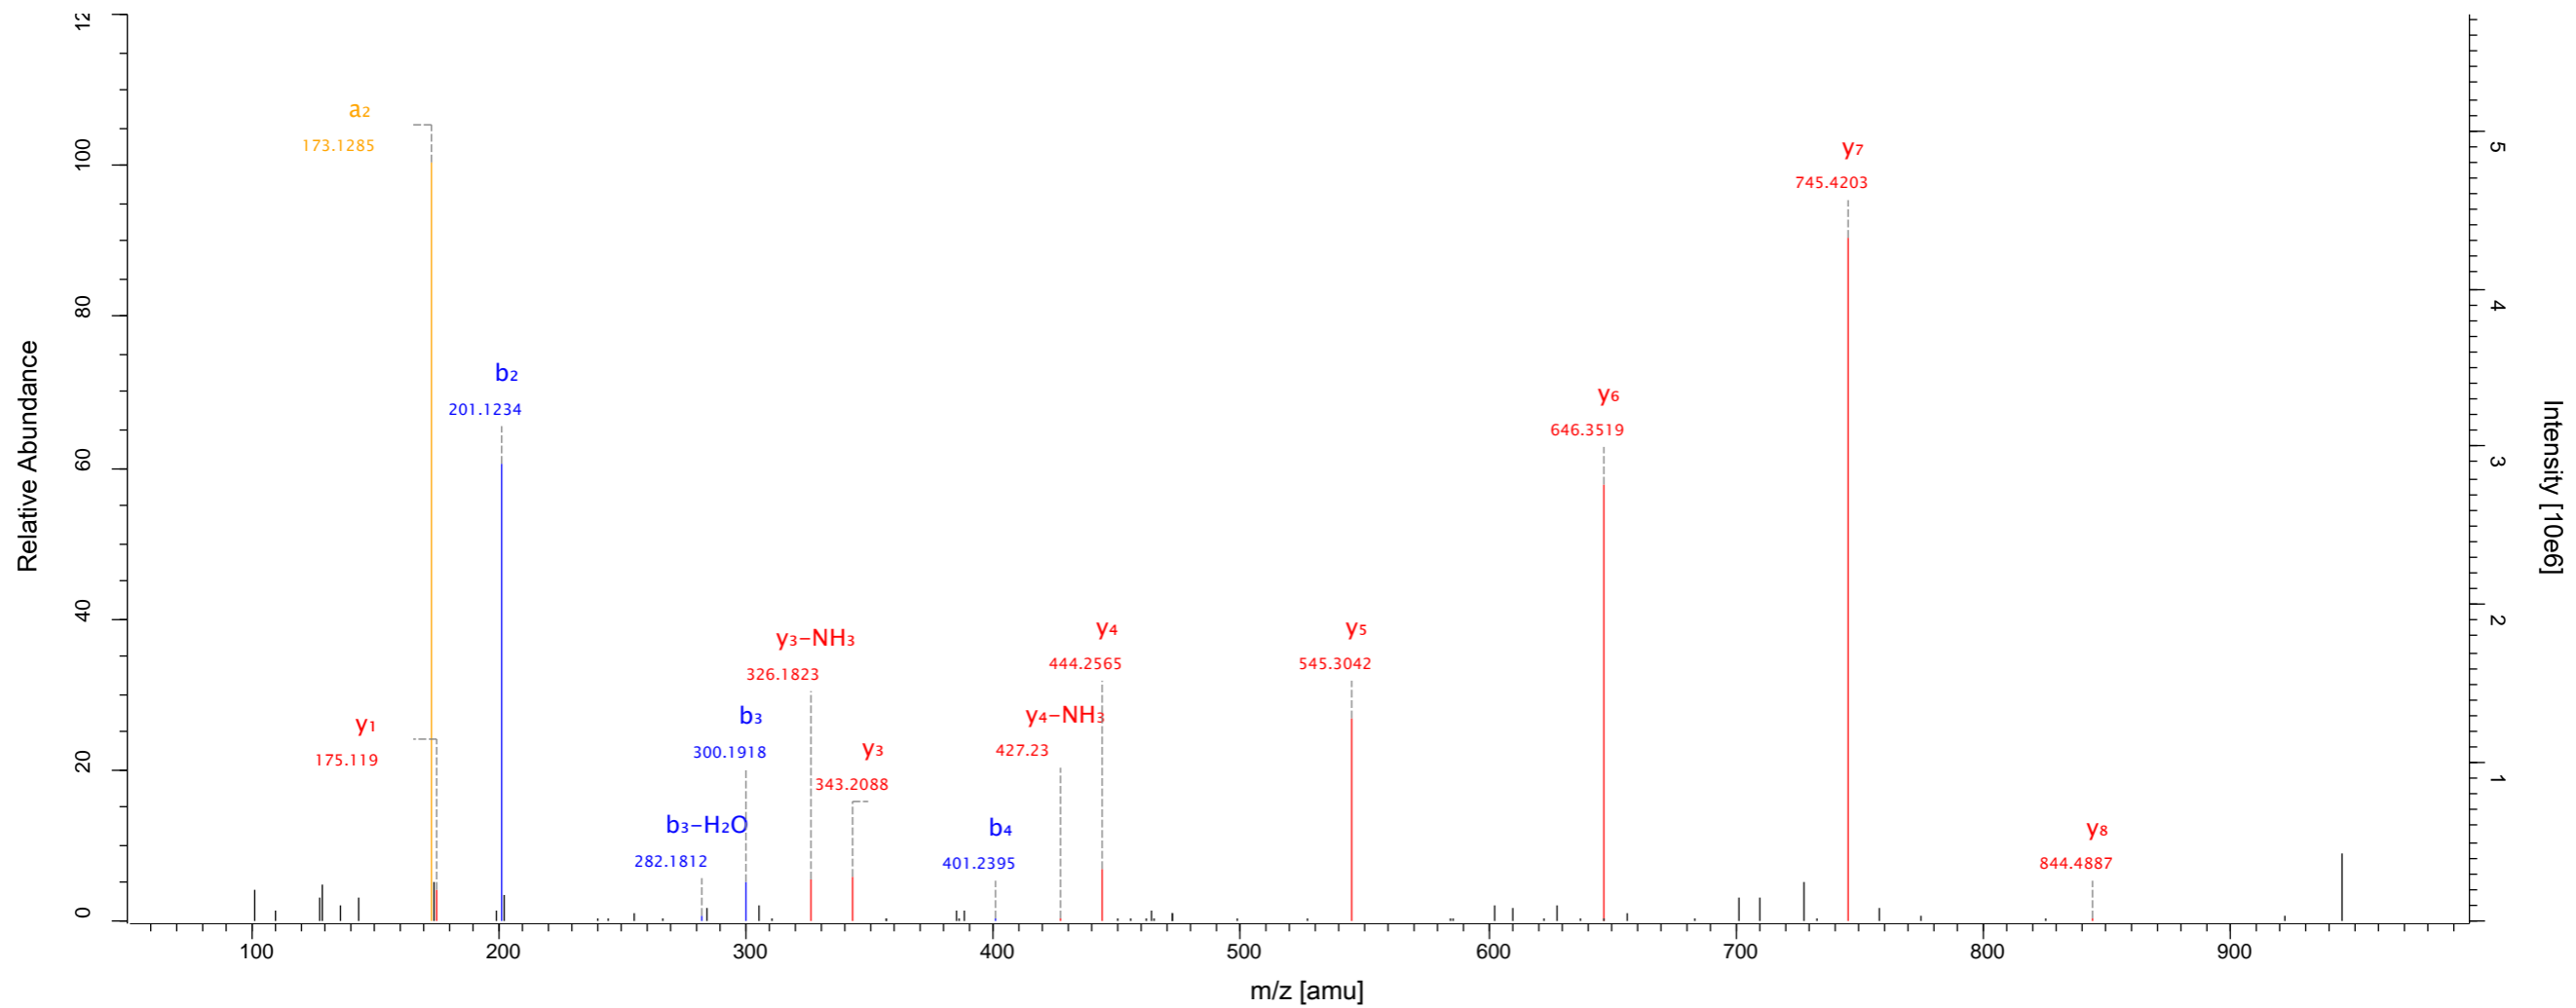

Raw file: 20111212\_EXQ5\_AnMi\_QC\_HCMVp1\_27  
Scan number: 8072  
Protein: ORFL234C - NC\_006273.2[148754,149149]- <unknown description>  
Peptide score: 73.78  
Method: FTMS; HCD

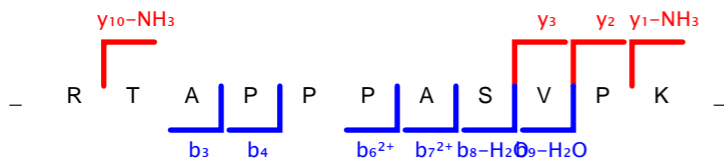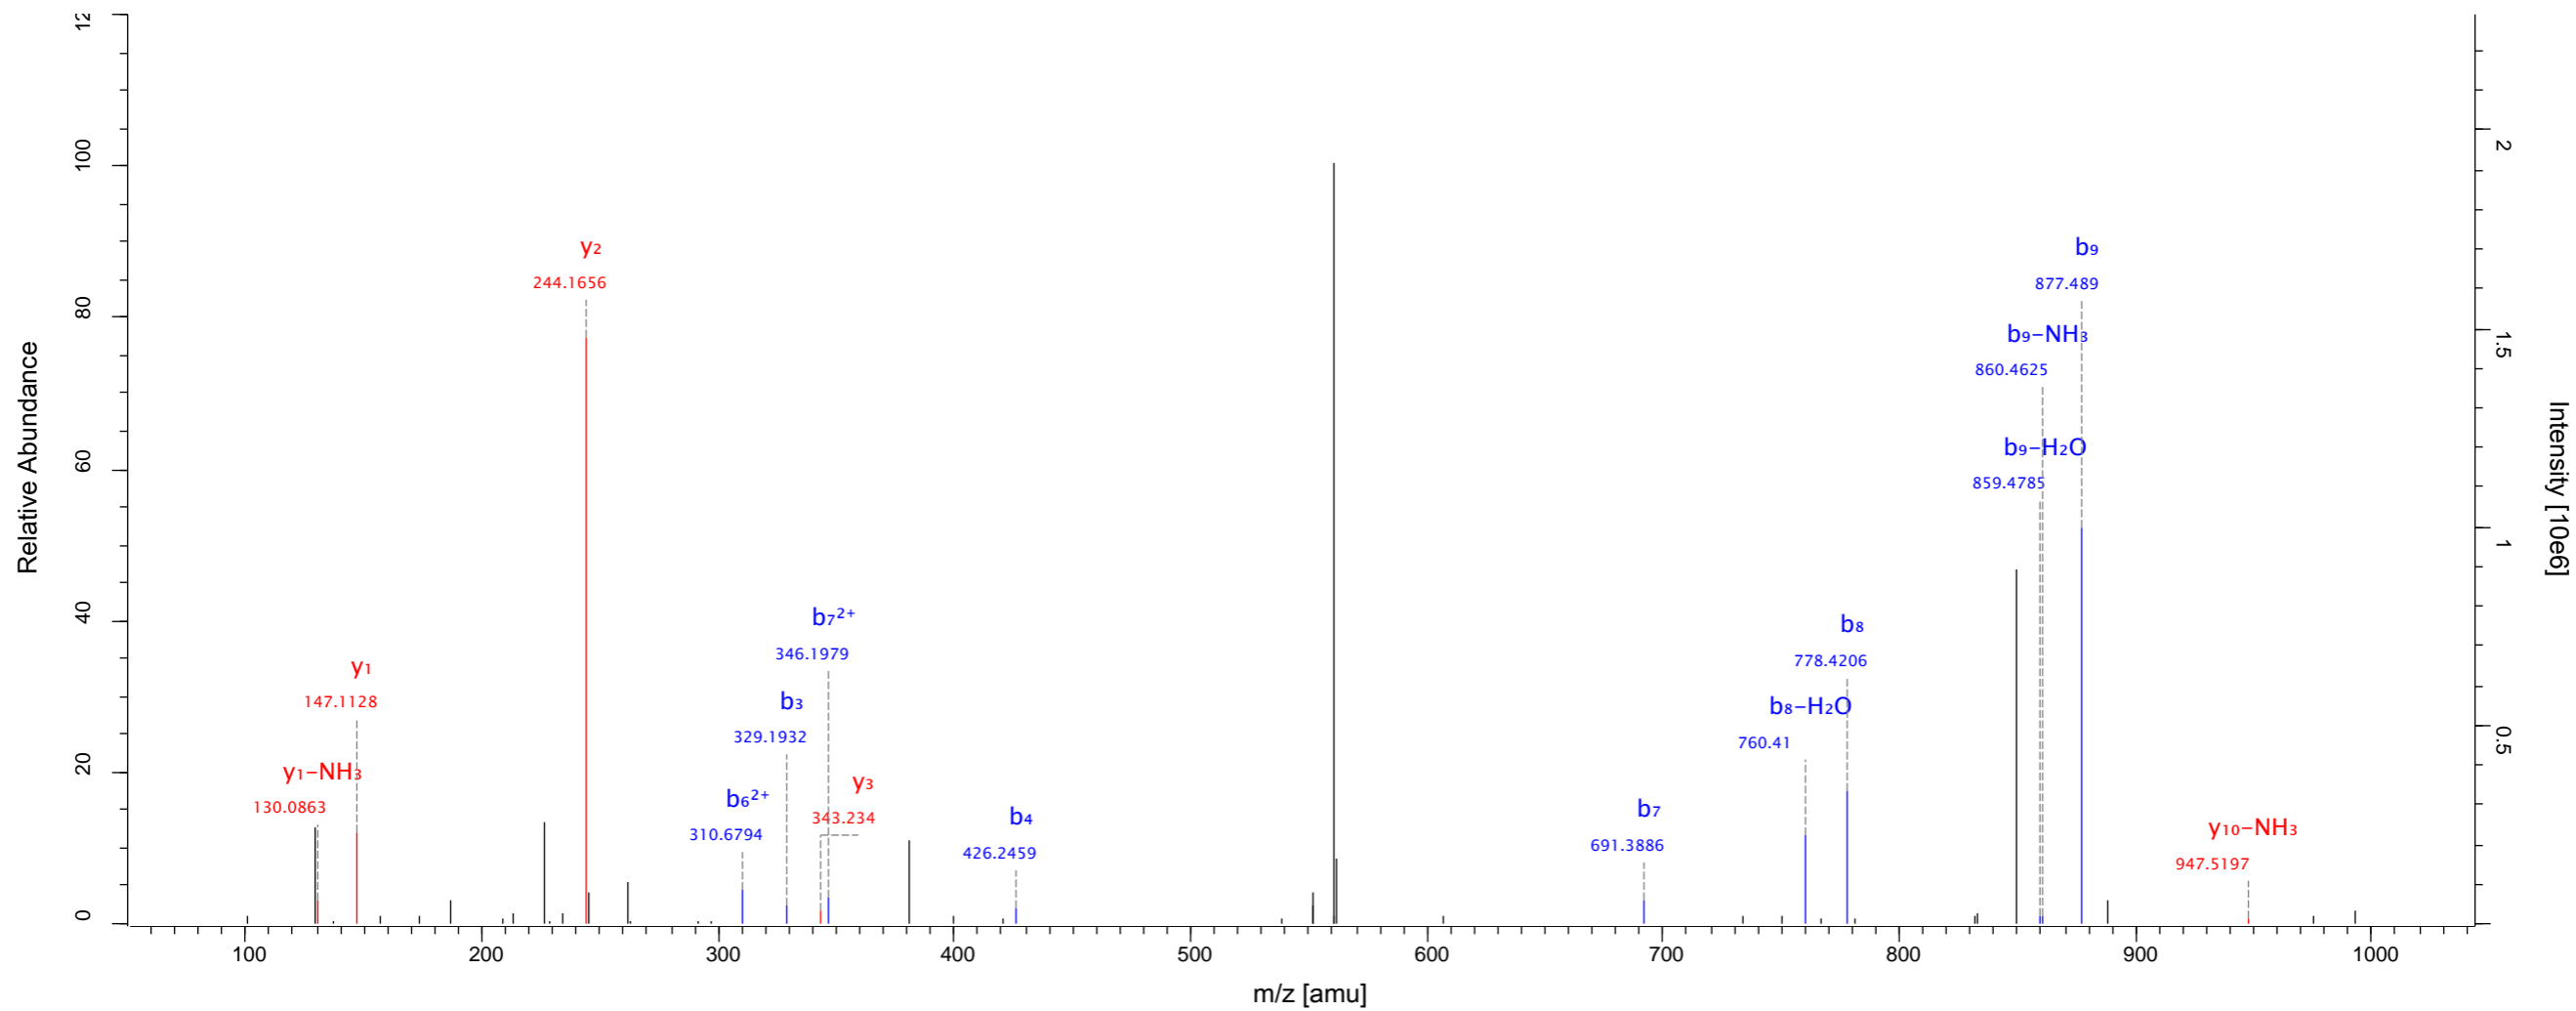



Raw file: 20111212\_EXQ5\_AnMi\_QC\_HCMVp11\_27  
Scan number: 8216  
Protein: ORFL190C - NC\_006273.2[111965,112384]- <unknown description>  
Peptide score: 84  
Method: FTMS; HCD

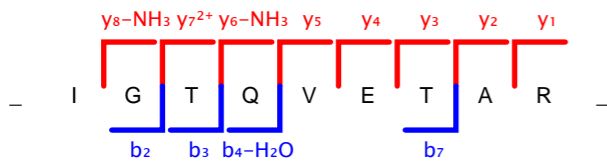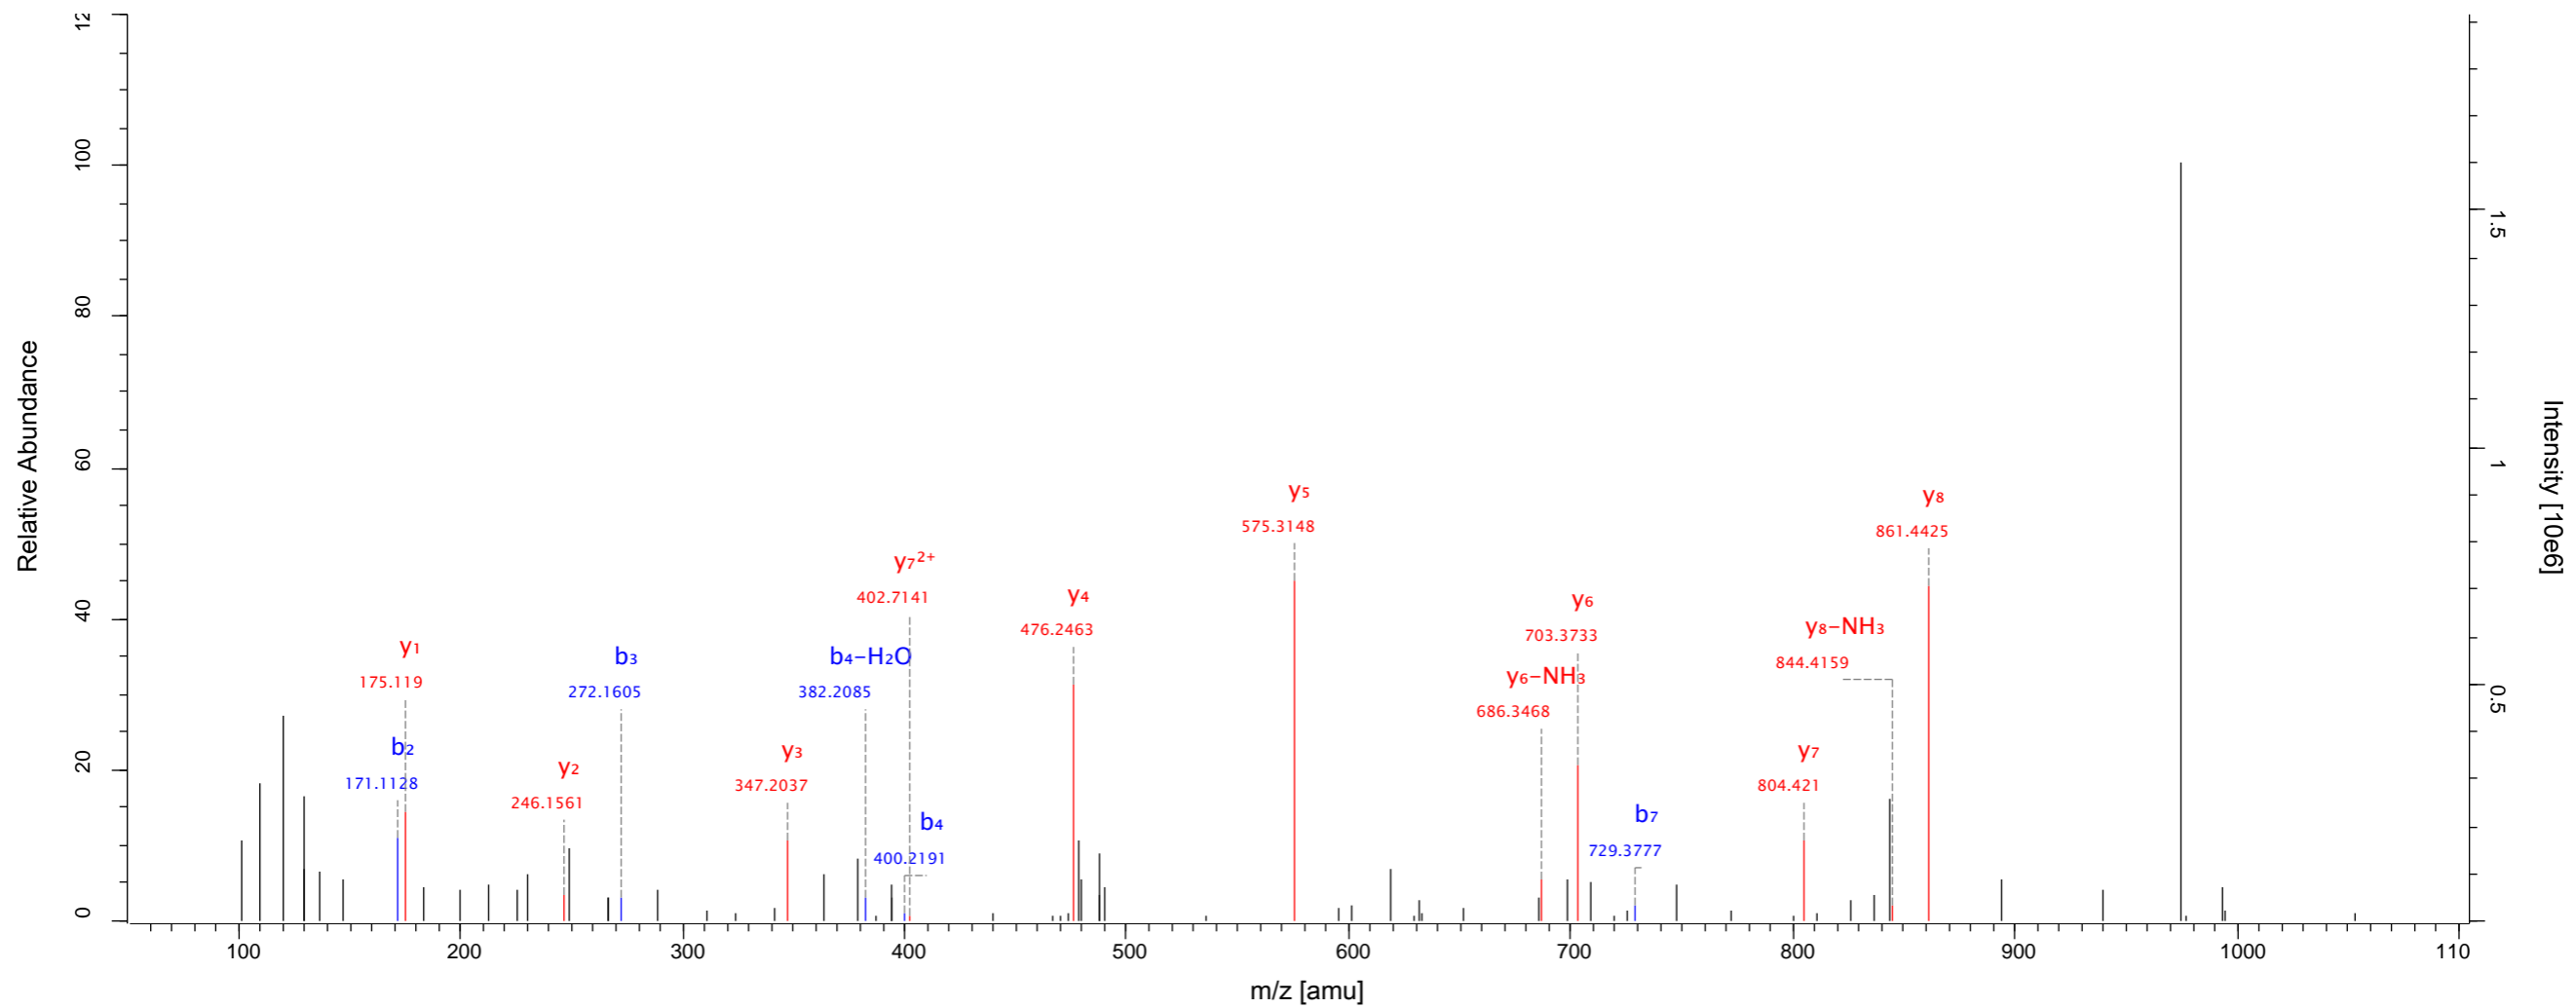

Raw file: 20111212\_EXQ5\_AnMi\_QC\_HCMVp1\_27  
Scan number: 8923  
Protein: ORFL119C - NC\_006273.2[63363,63800]- <unknown description>  
Peptide score: 96.71  
Method: FTMS; HCD

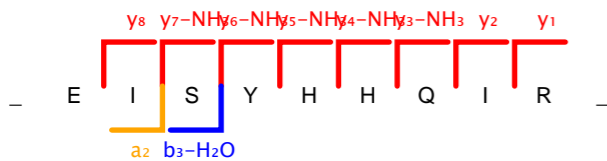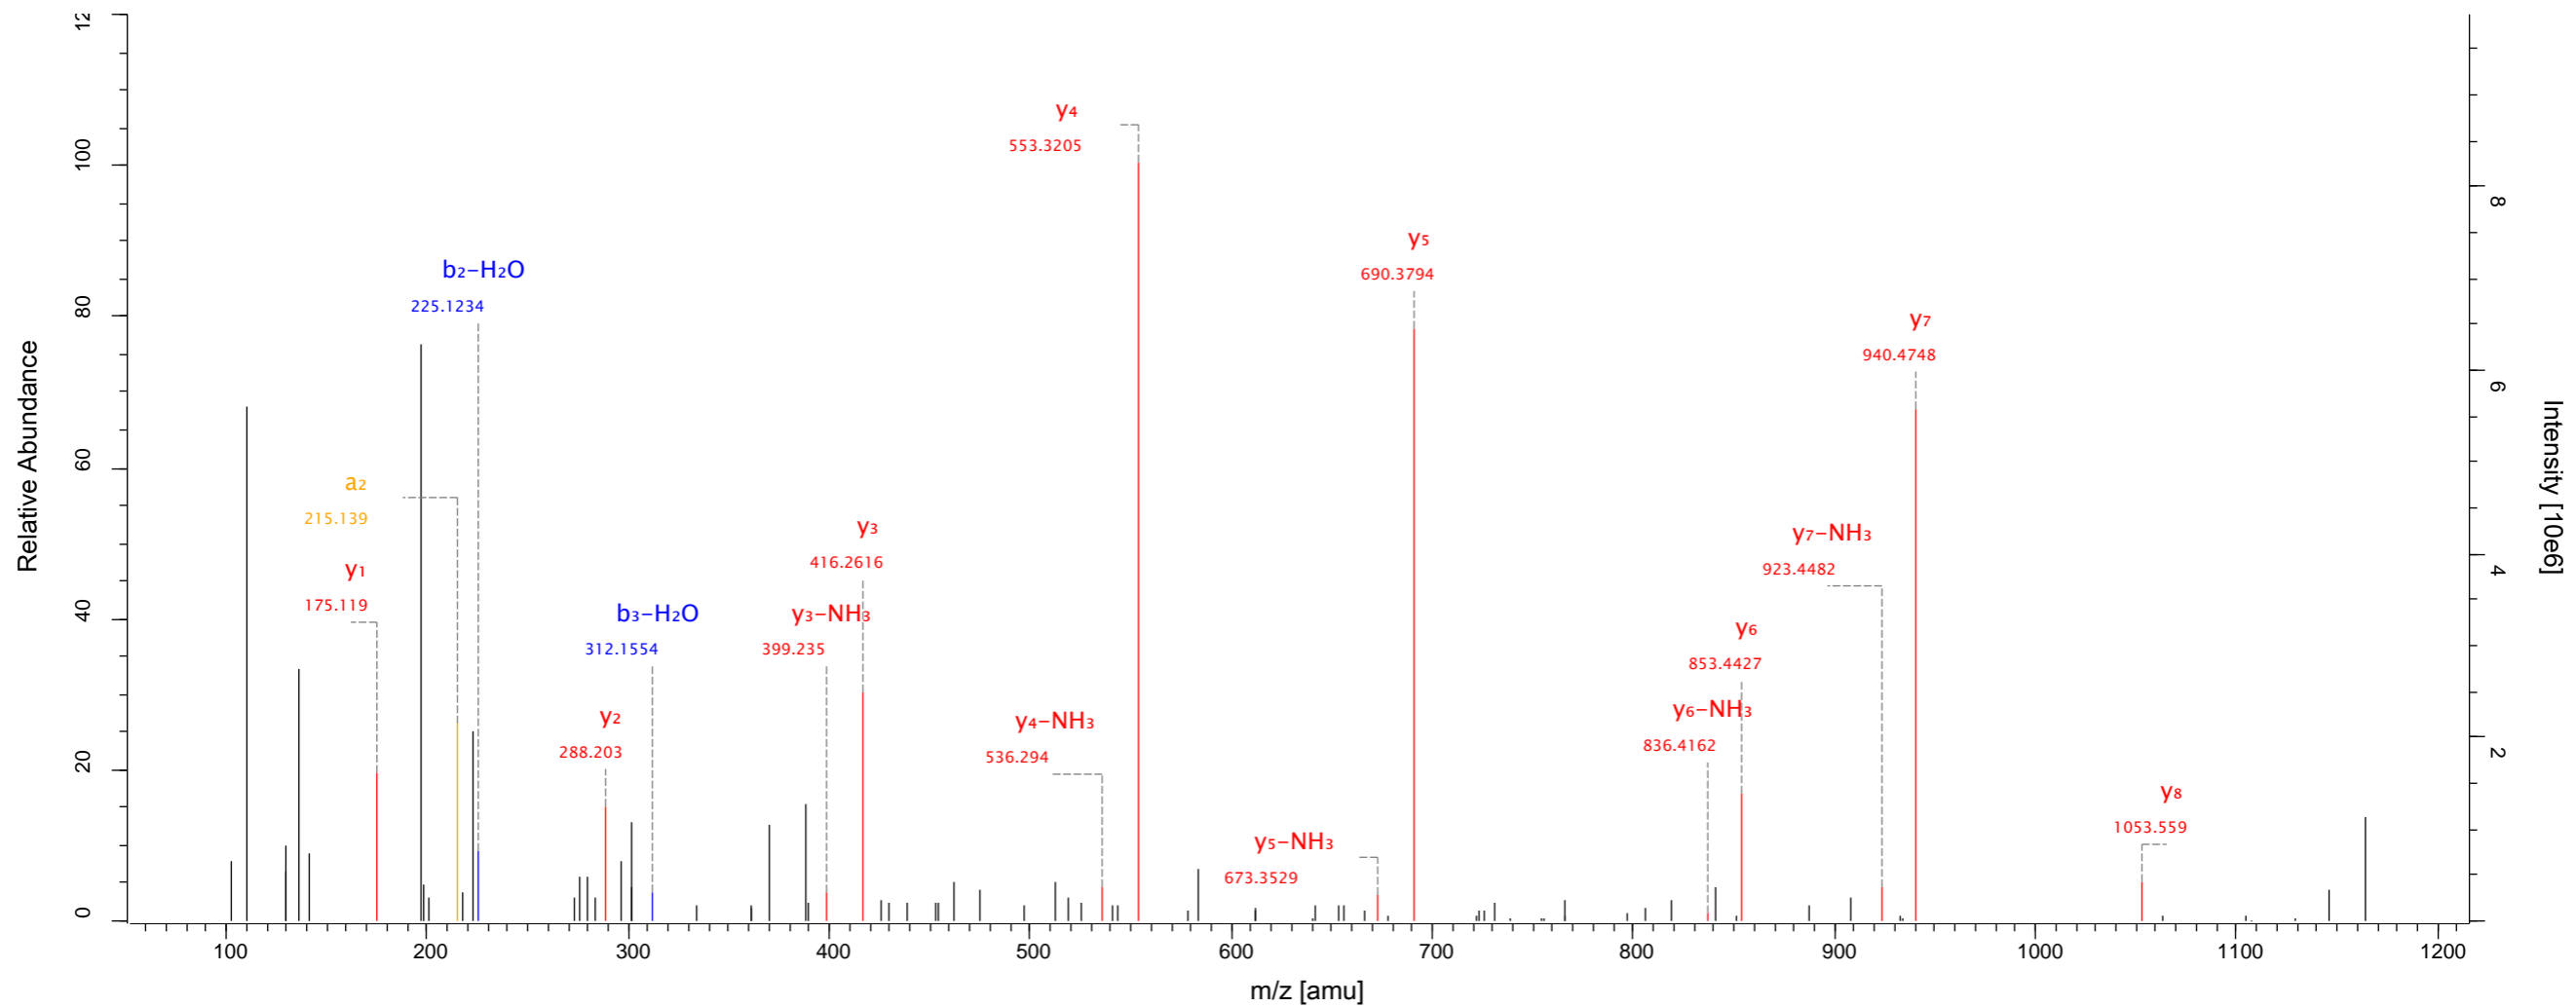

Raw file: 20111212\_EXQ5\_AnMi\_QC\_HCMVp1\_27  
Scan number: 9323  
Protein: ORFL130W + NC\_006273.2[72313,72744]+ <unknown description>  
Peptide score: 101.43  
Method: FTMS; HCD

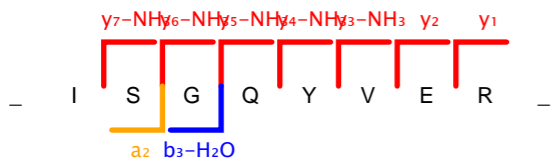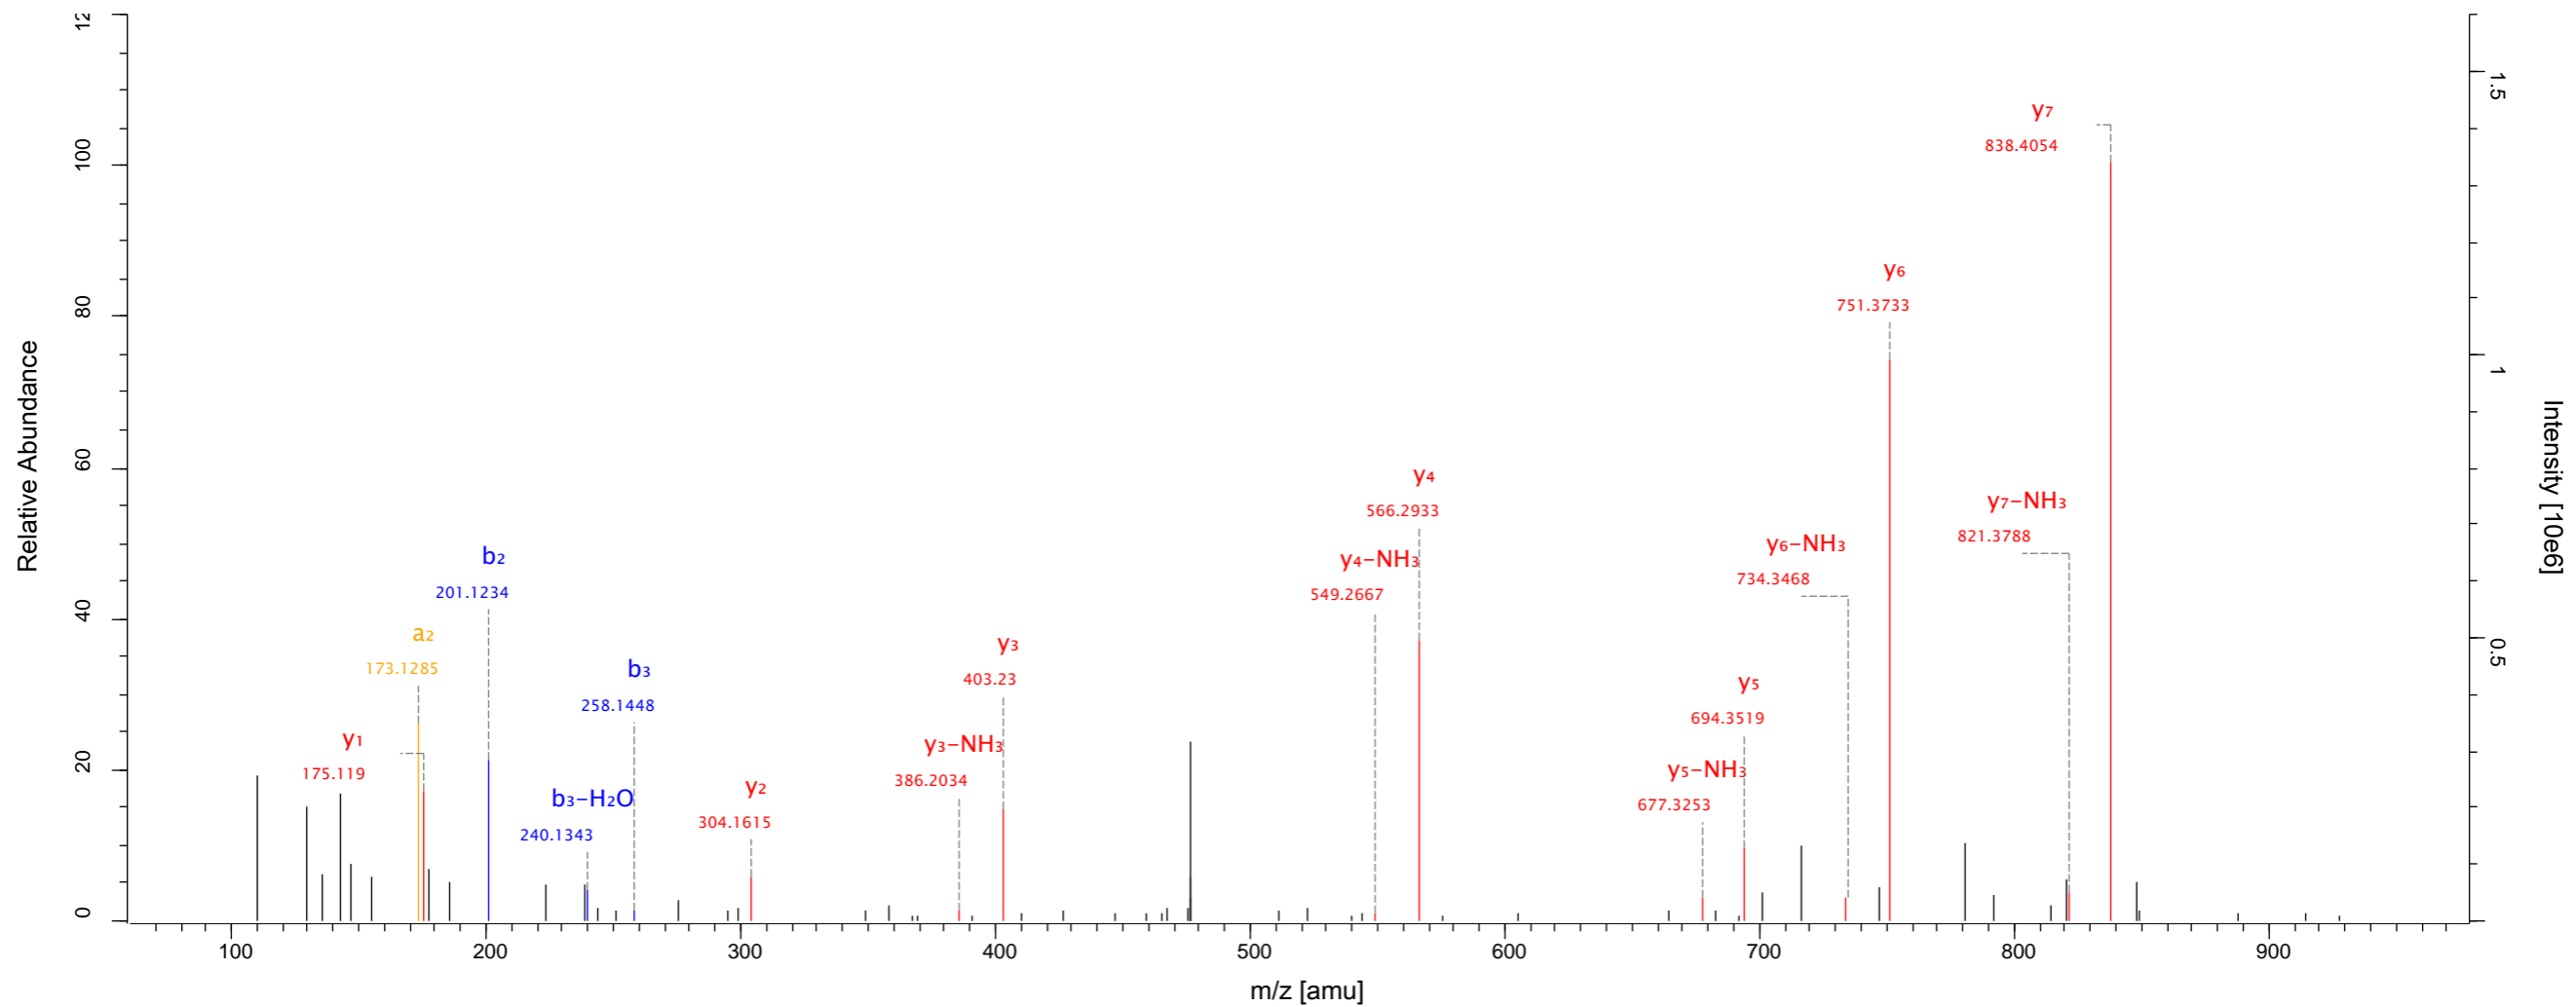

Raw file: 20111212\_EXQ5\_AnMi\_QC\_HCMVp1\_29  
 Scan number: 11409  
 Protein: ORFL82W + NC\_006273.2[36796,37488]+ <unknown description>  
 Peptide score: 108.31  
 Method: FTMS; HCD

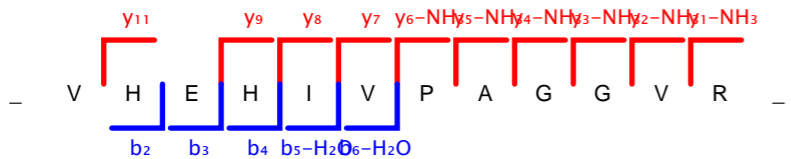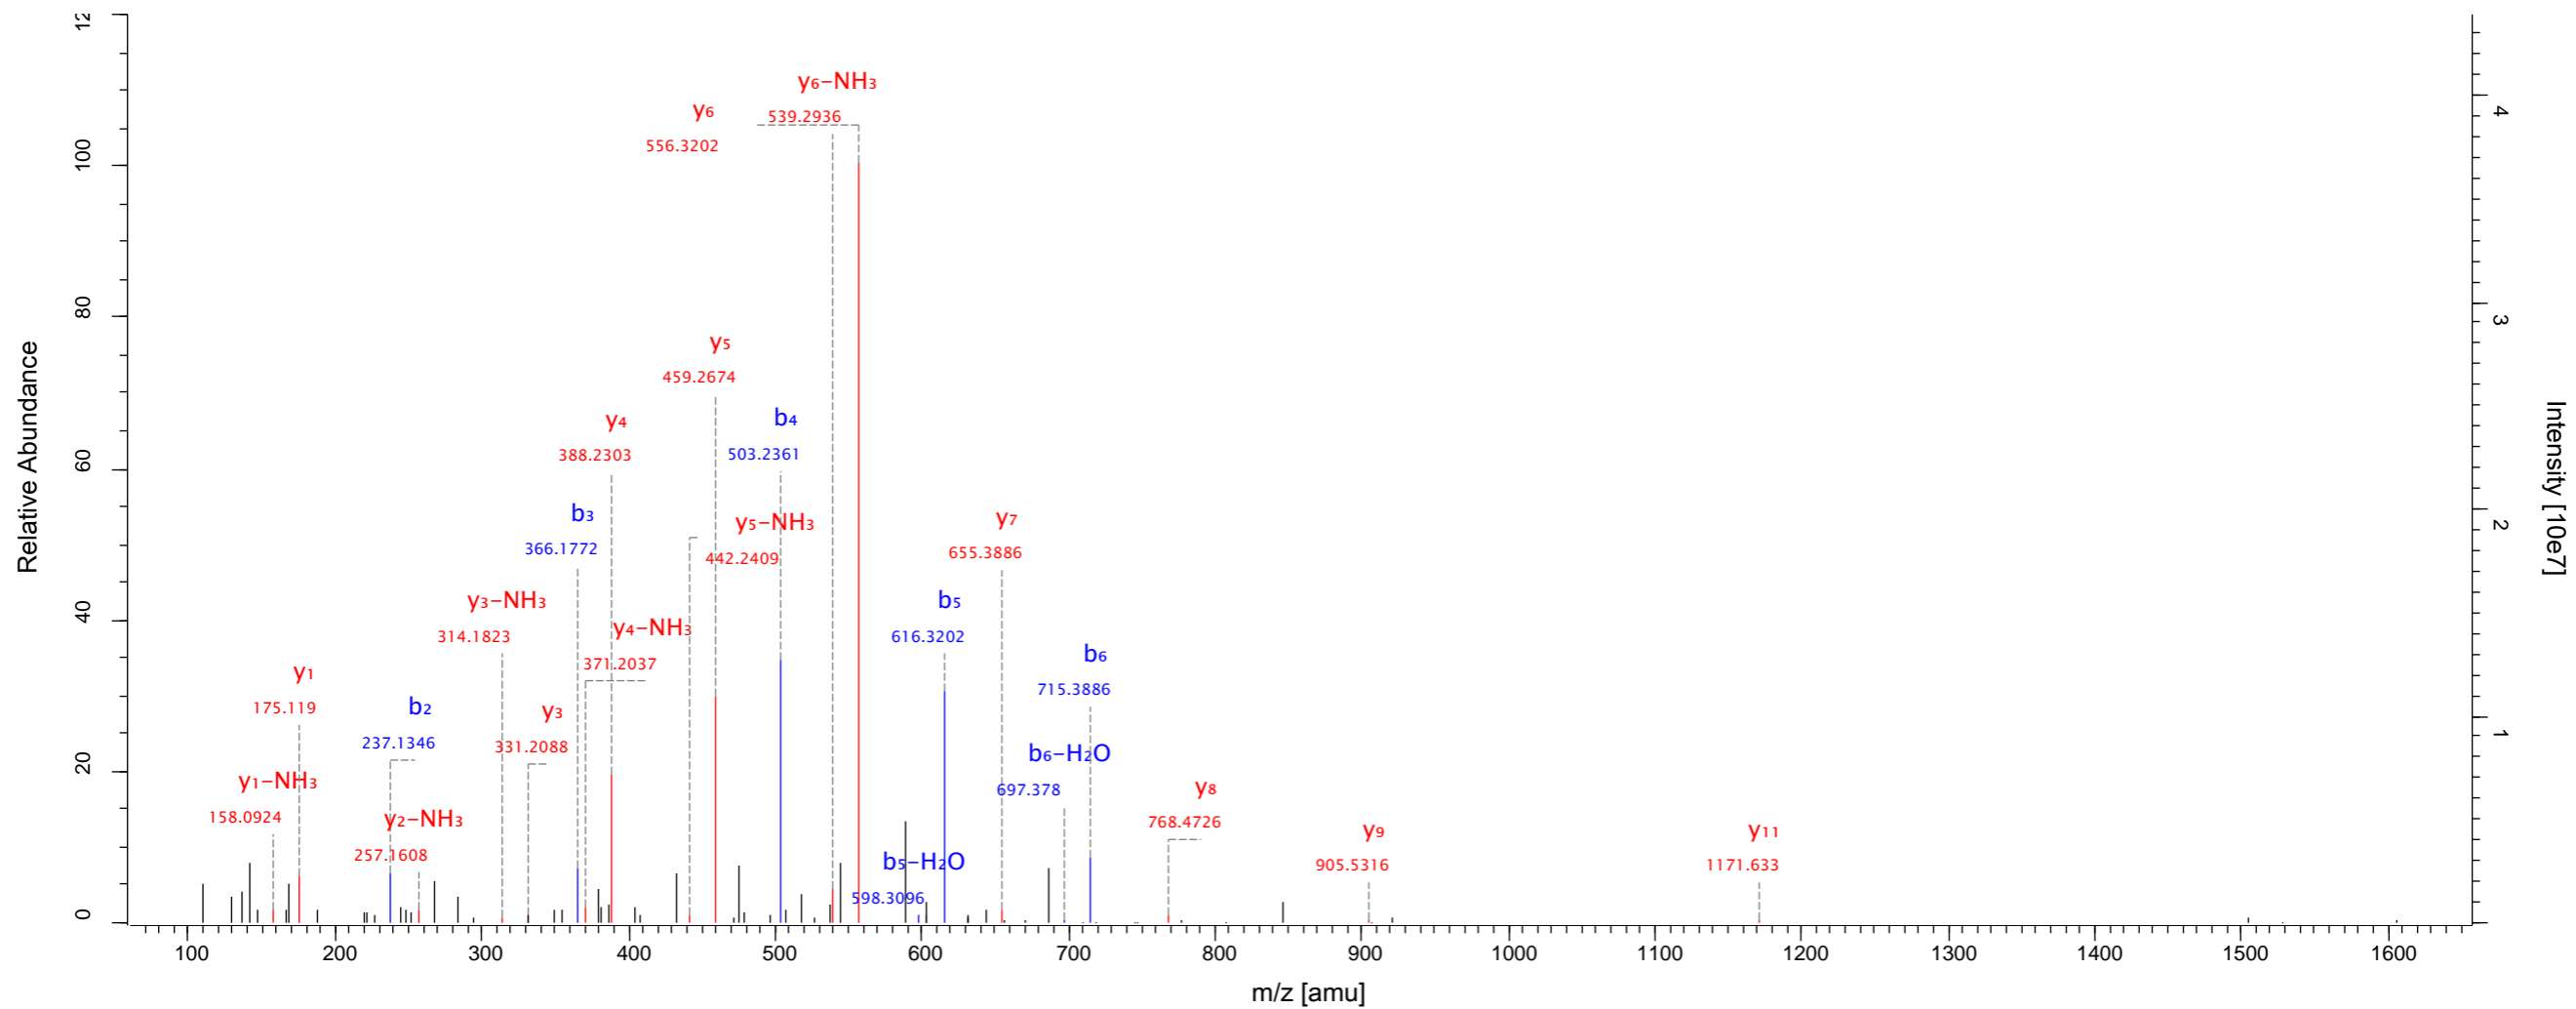

Raw file: 20111212\_EXQ5\_AnMi\_QC\_HCMVp1\_29  
Scan number: 14263  
Protein: ORFL299W + NC\_006273.2[185047,185685]+ <unknown description>  
Peptide score: 105.14  
Method: FTMS; HCD

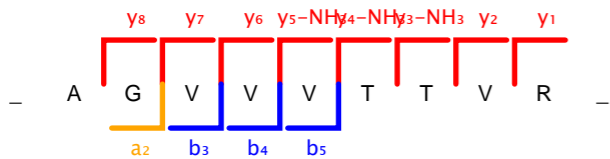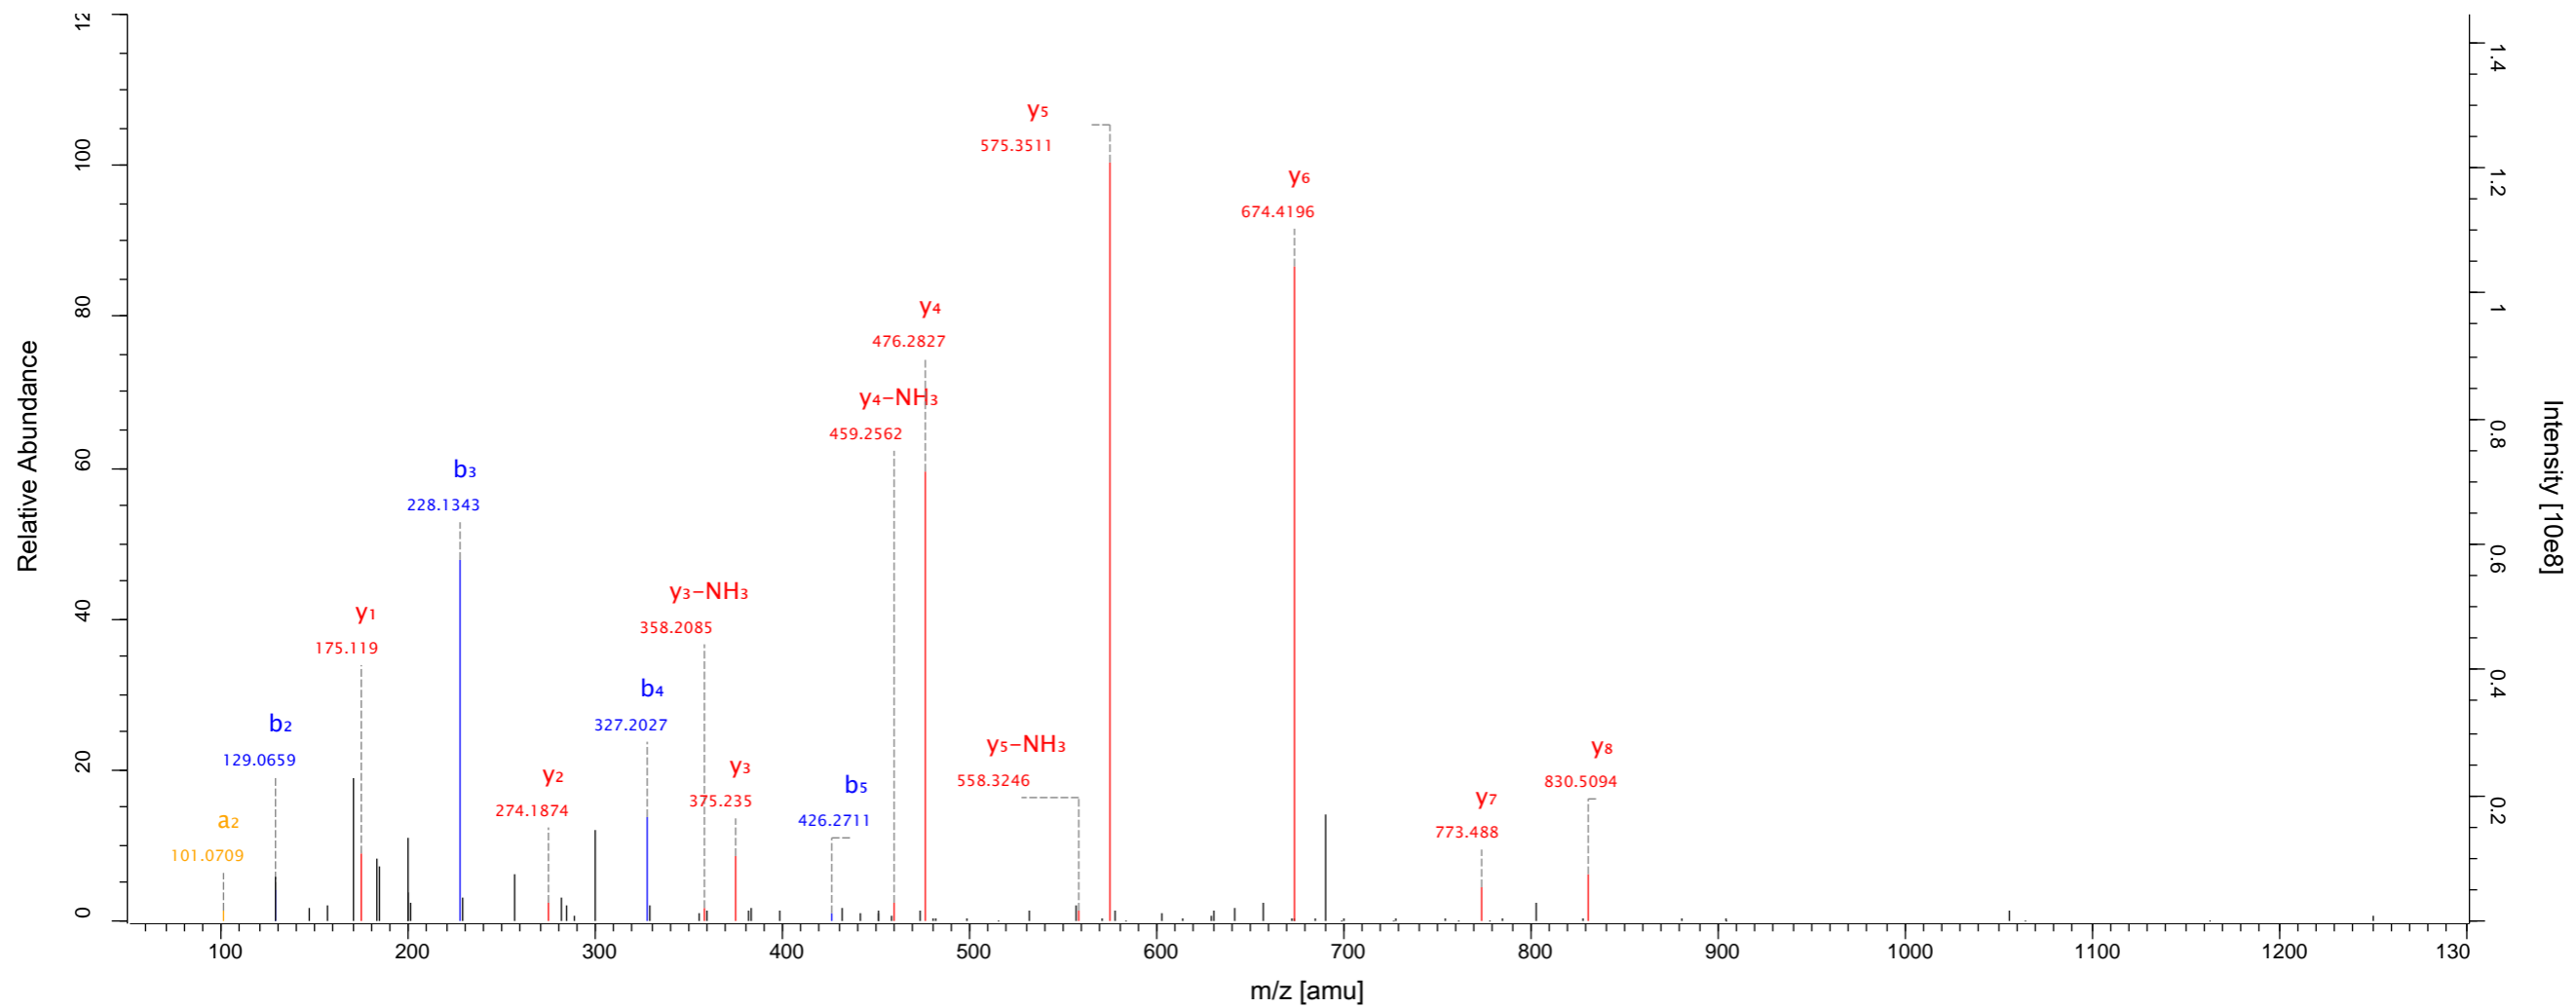

Raw file: 20111212\_EXQ5\_AnMi\_QC\_HCMVp11\_29  
Scan number: 21970  
Protein: ORFL82W + NC\_006273.2[36796,37488]+ <unknown description>  
Peptide score: 83  
Method: FTMS; HCD

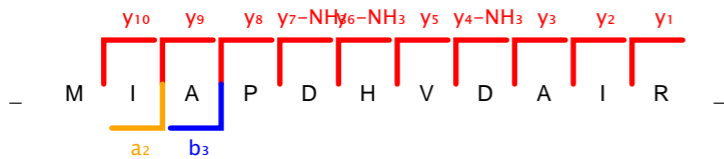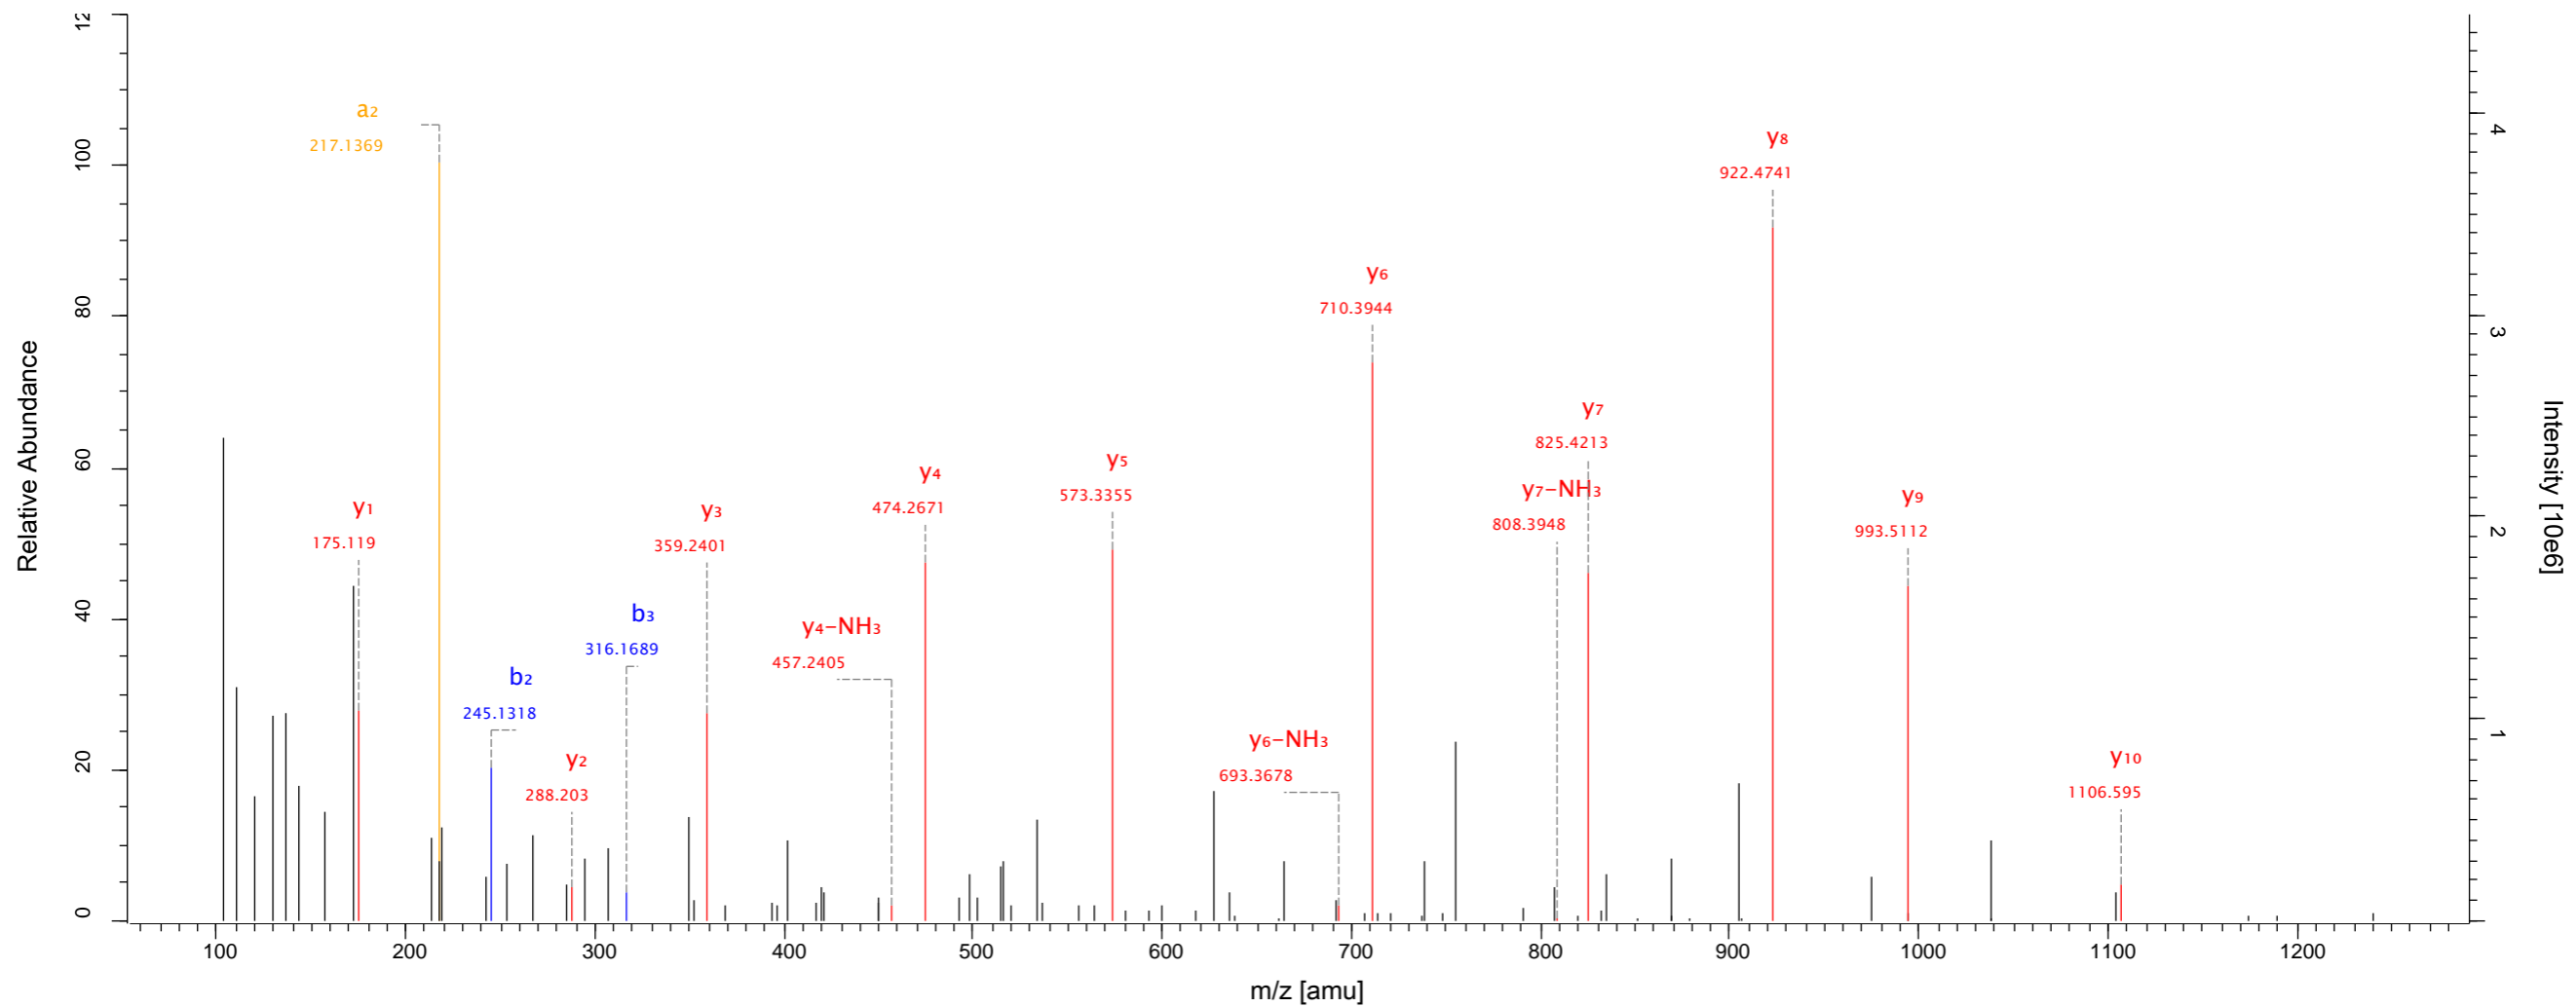

Raw file: 20111212\_EXQ5\_AnMi\_QC\_HCMVp11\_29  
Scan number: 25809  
Protein: ORFL253W.IORF1 + NC\_006273.2[161917,163748]+ <unknown description>; ORFL251W + NC\_006273.2[161872,163748]+ <unknown description>  
Peptide score: 114.83  
Method: FTMS; HCD

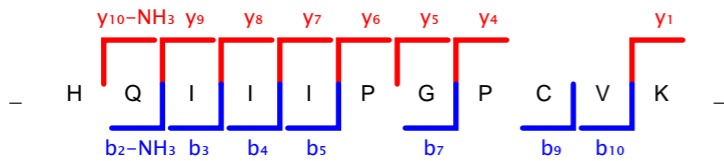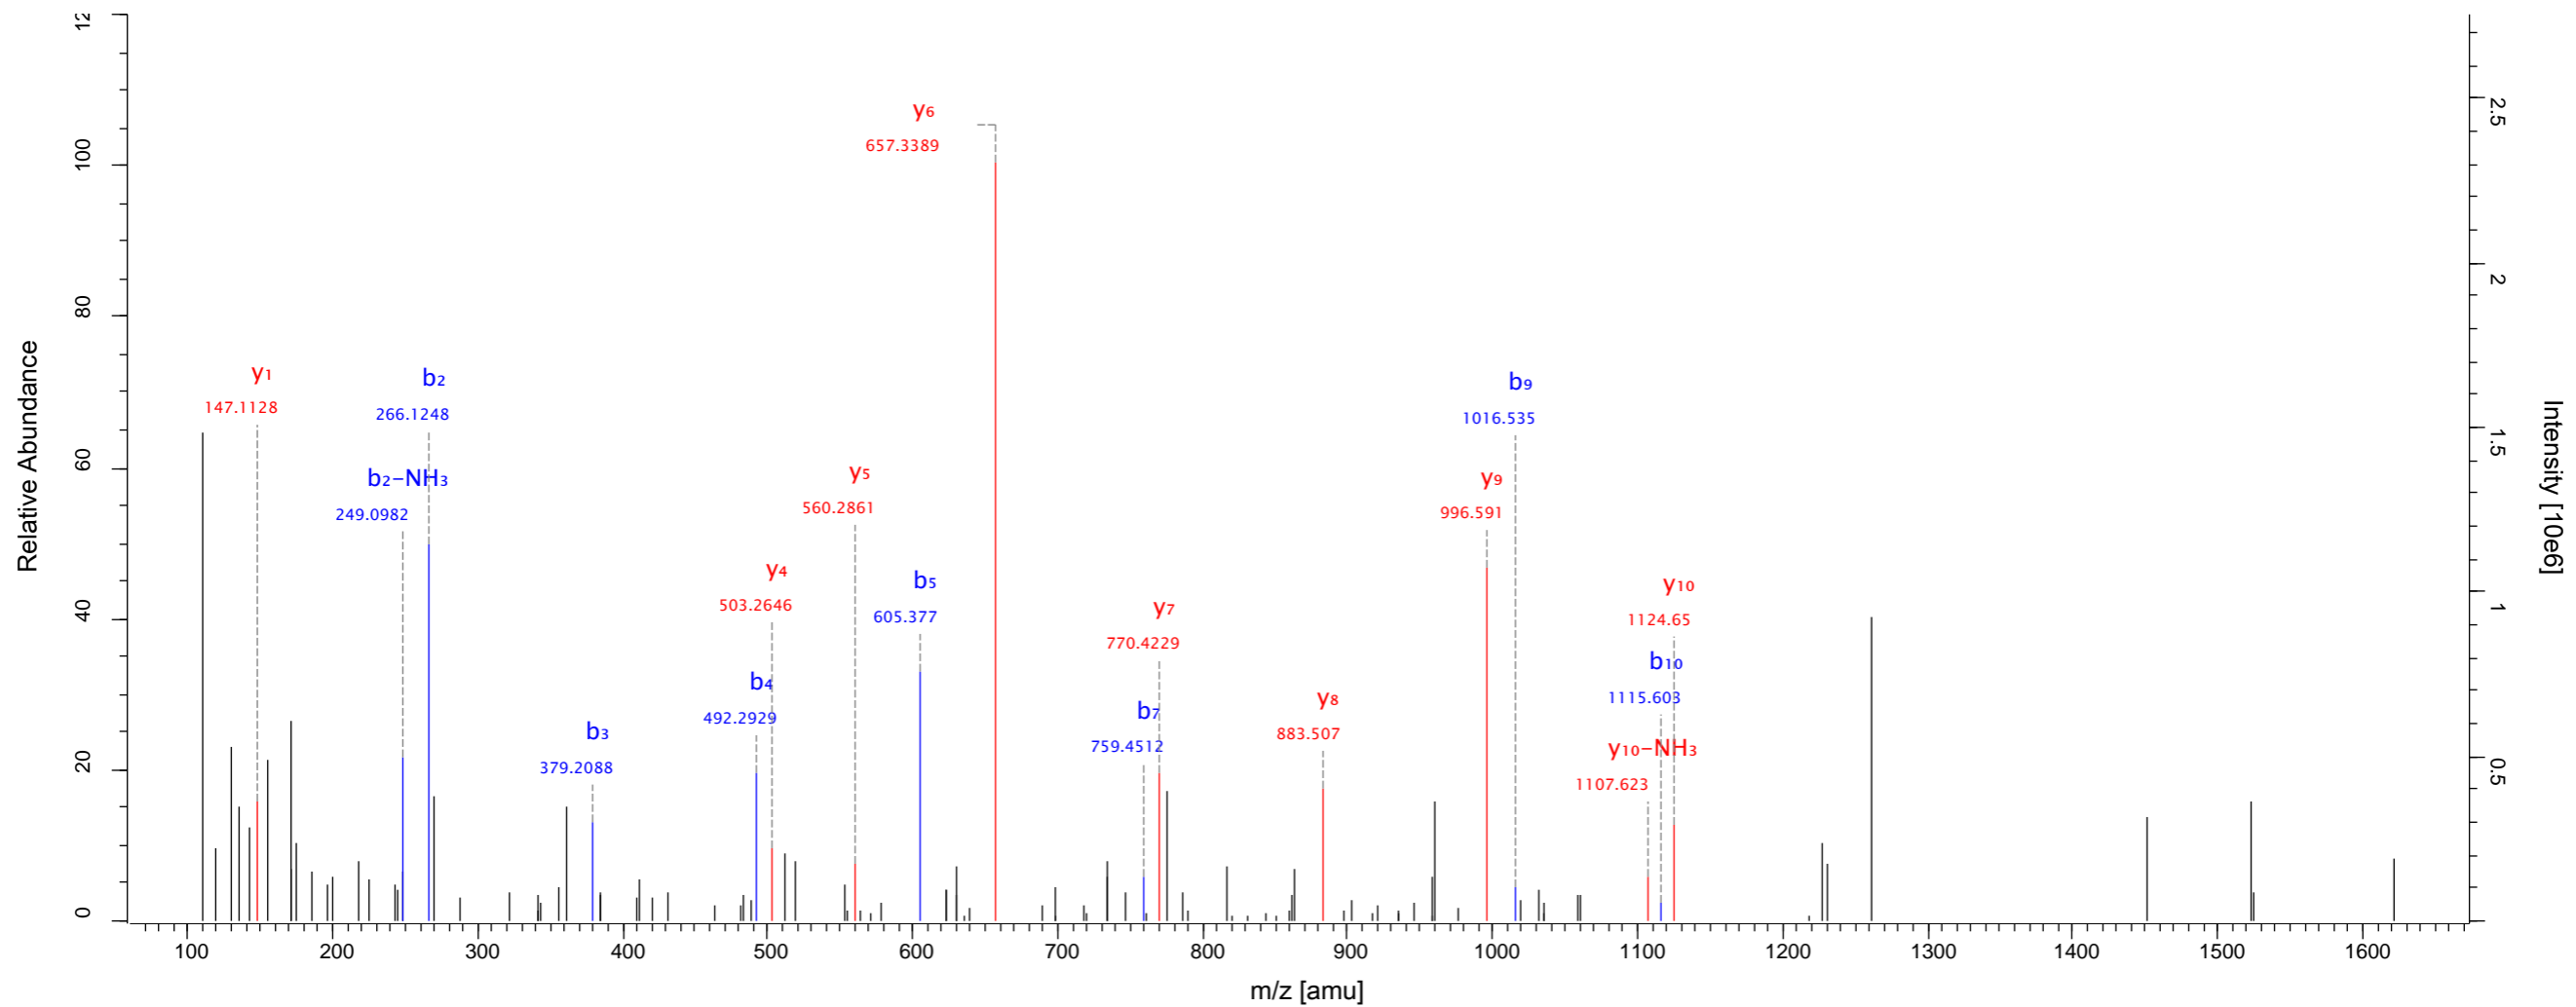

Raw file: 20111212\_EXQ5\_AnMi\_QC\_HCMVp11\_29  
Scan number: 30479  
Protein: ORFL299W + NC\_006273.2[185047,185685]+ <unknown description>  
Peptide score: 85.29  
Method: FTMS; HCD

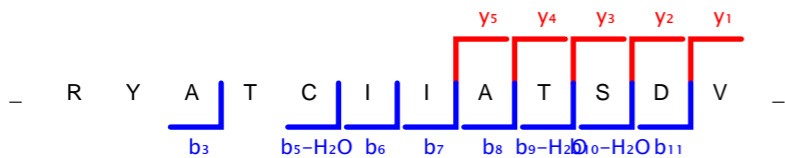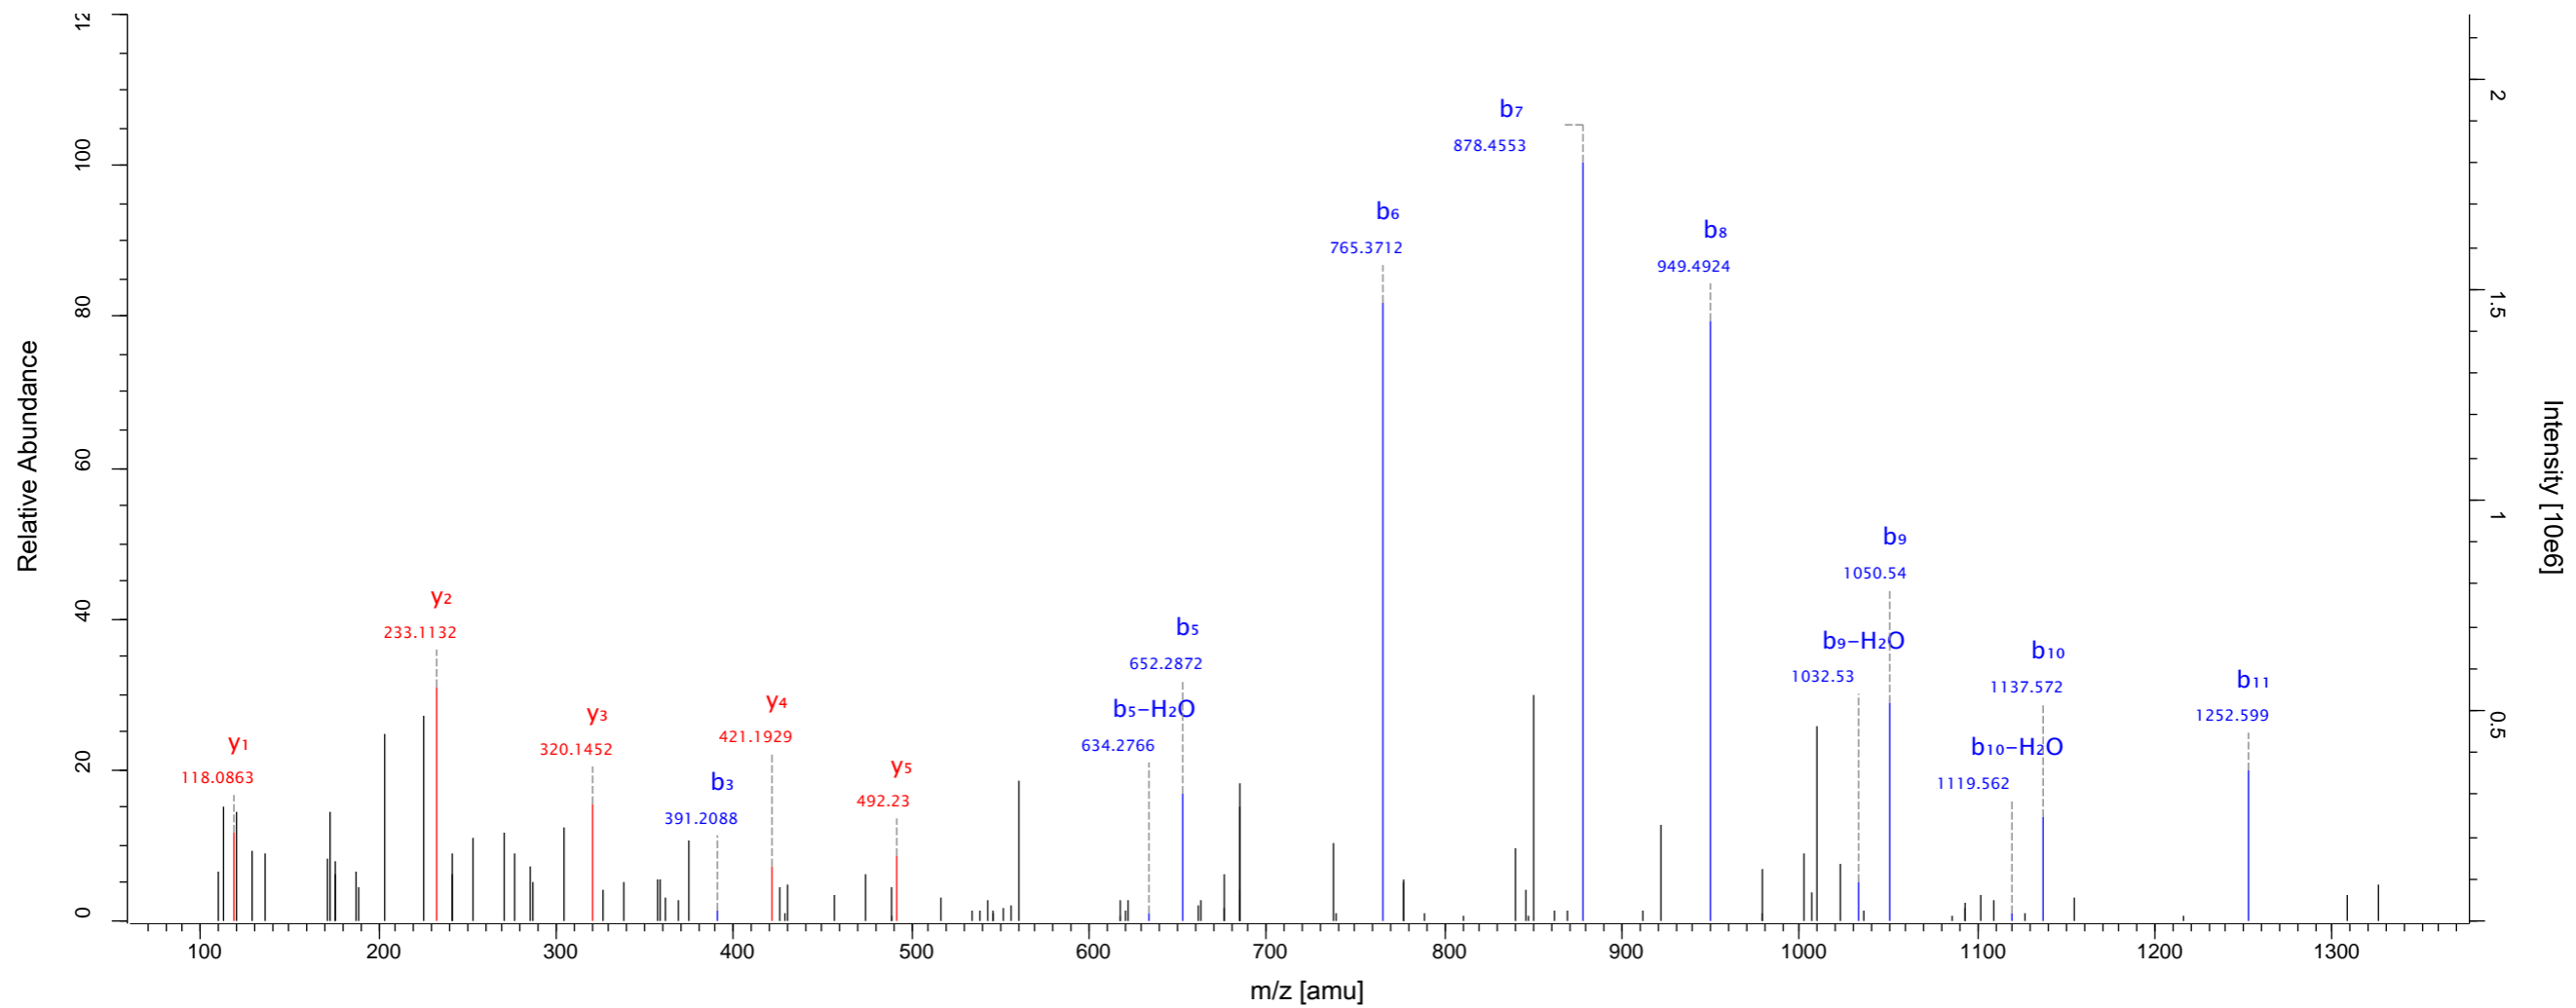



Raw file: 20111212\_EXQ5\_AnMi\_QC\_HCMVp1\_29  
 Scan number: 37461  
 Protein: ORFL82W + NC\_006273.2[36796,37488]+ <unknown description>  
 Peptide score: 150.53  
 Method: FTMS; HCD

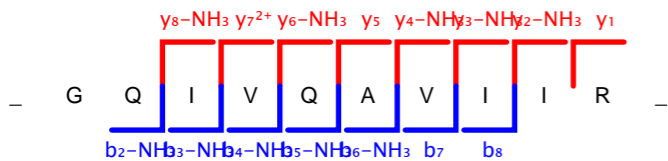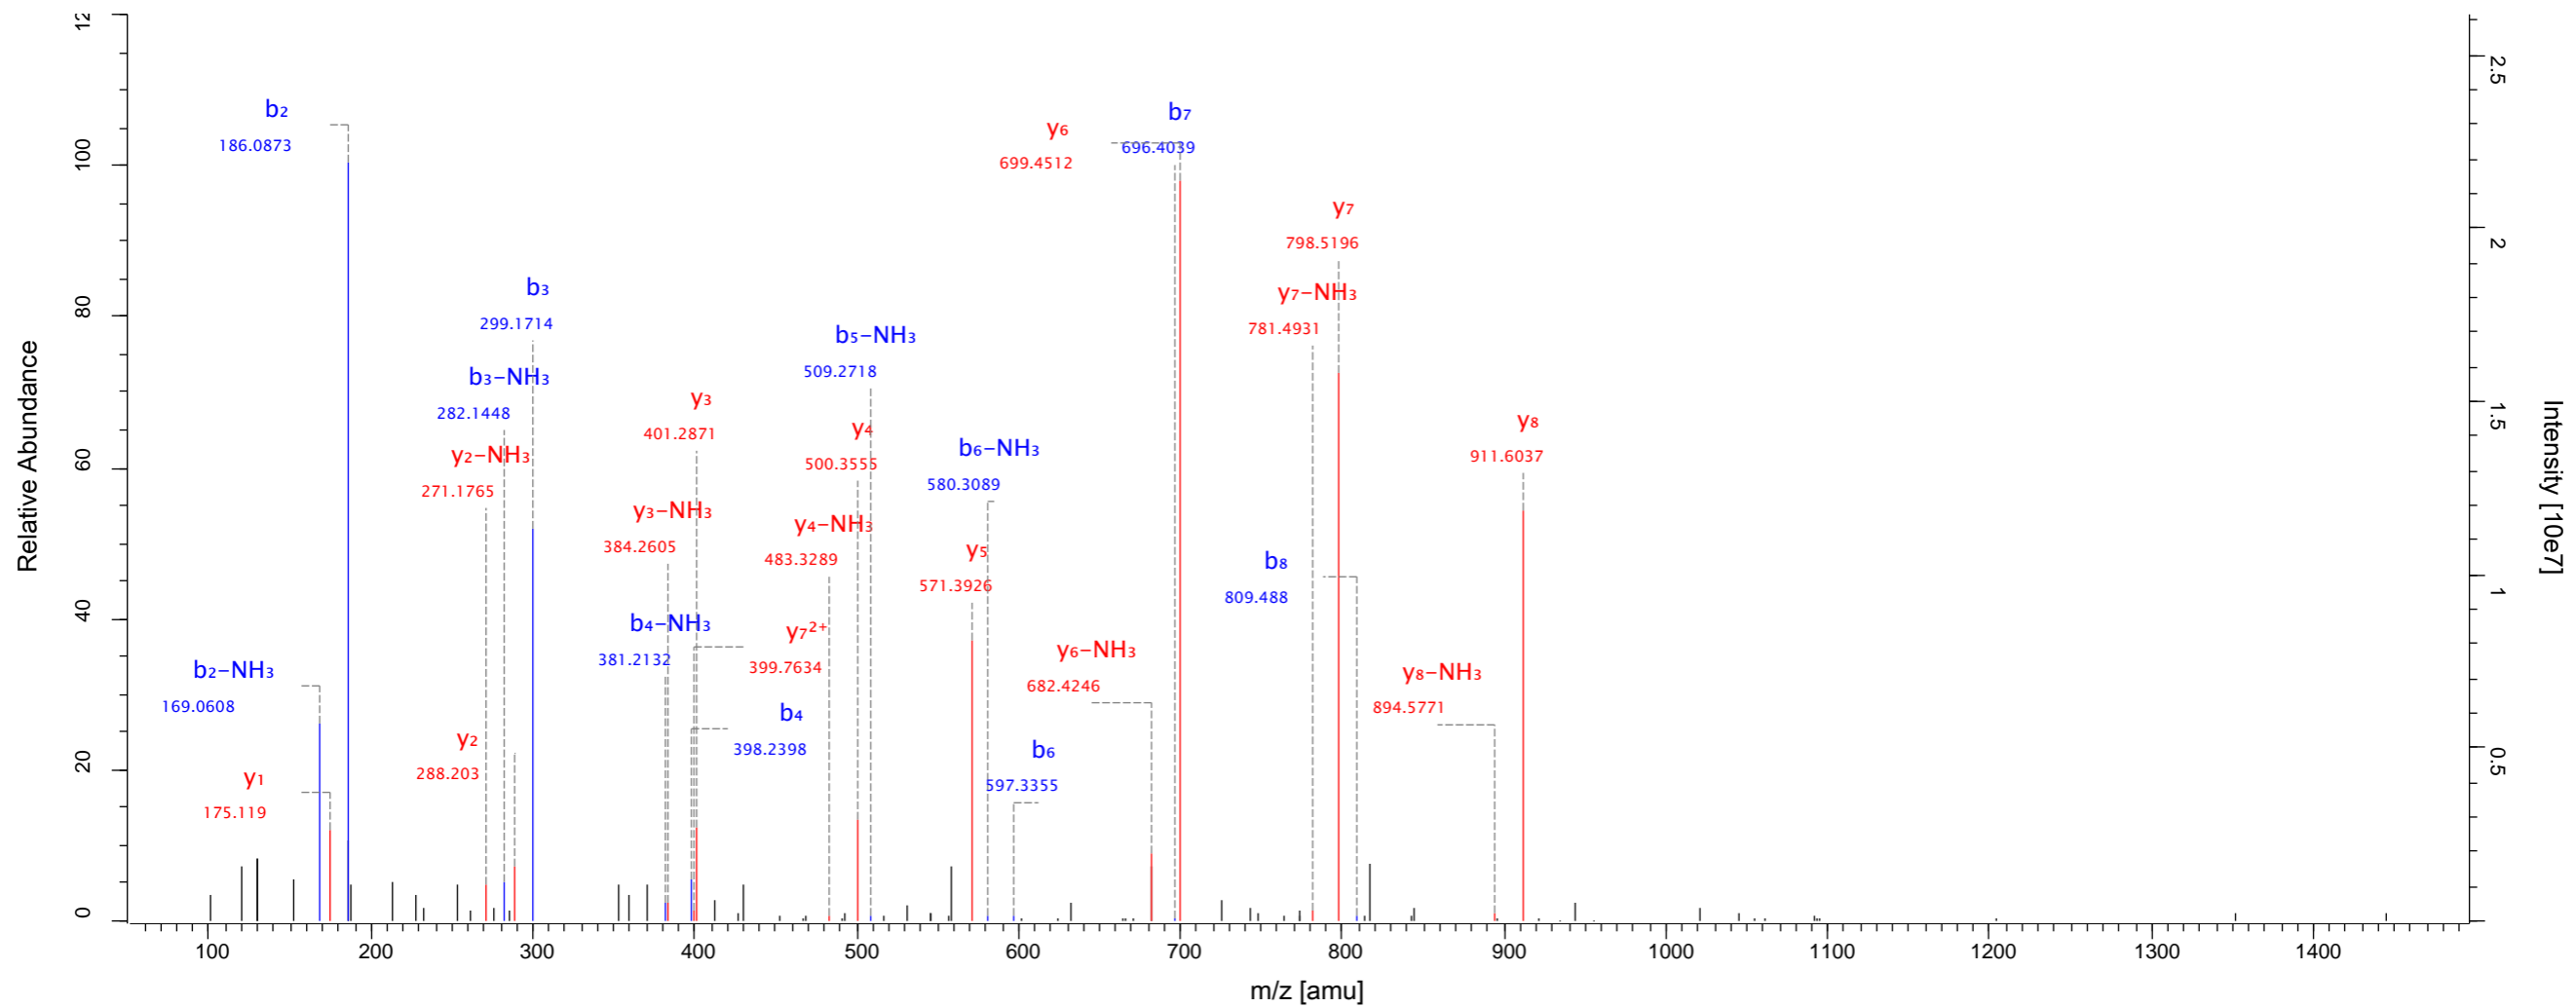

Raw file: 20111212\_EXQ5\_AnMi\_QC\_HCMVp1\_29  
 Scan number: 53671  
 Protein: ORFL82W + NC\_006273.2[36796,37488]+ <unknown description>  
 Peptide score: 189.79  
 Method: FTMS; HCD

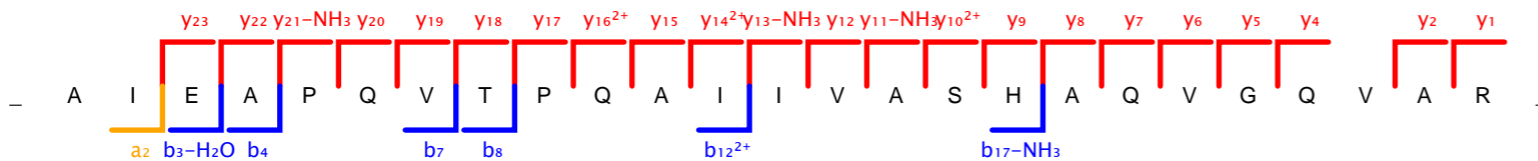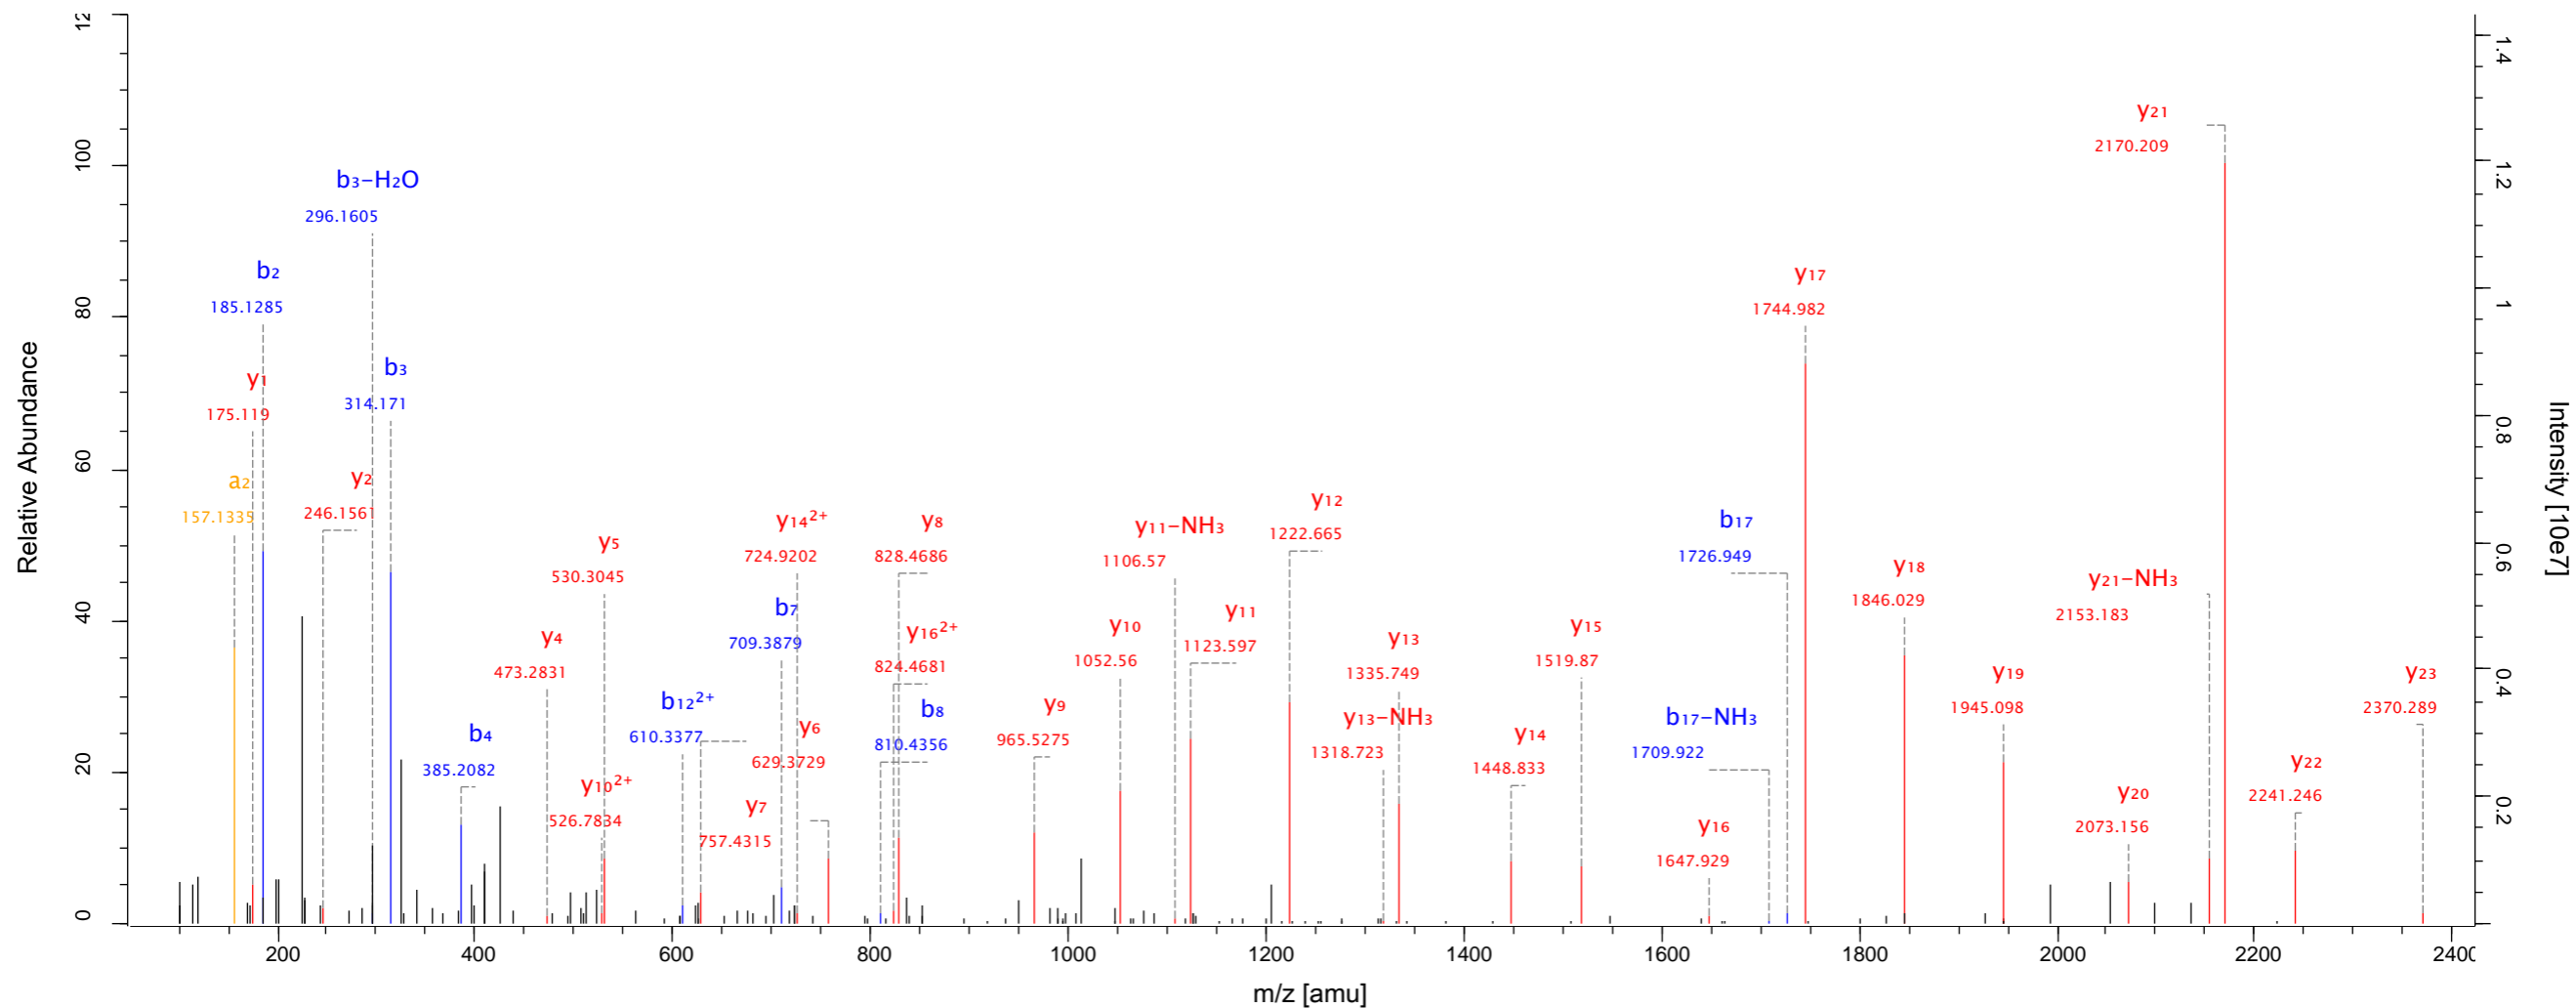

Raw file: 20111212\_EXQ5\_AnMi\_QC\_HCMVp11\_29  
Scan number: 53735  
Protein: ORFL82W + NC\_006273.2[36796,37488]+ <unknown description>  
Peptide score: 78.77  
Method: FTMS; HCD

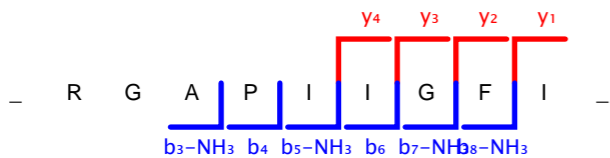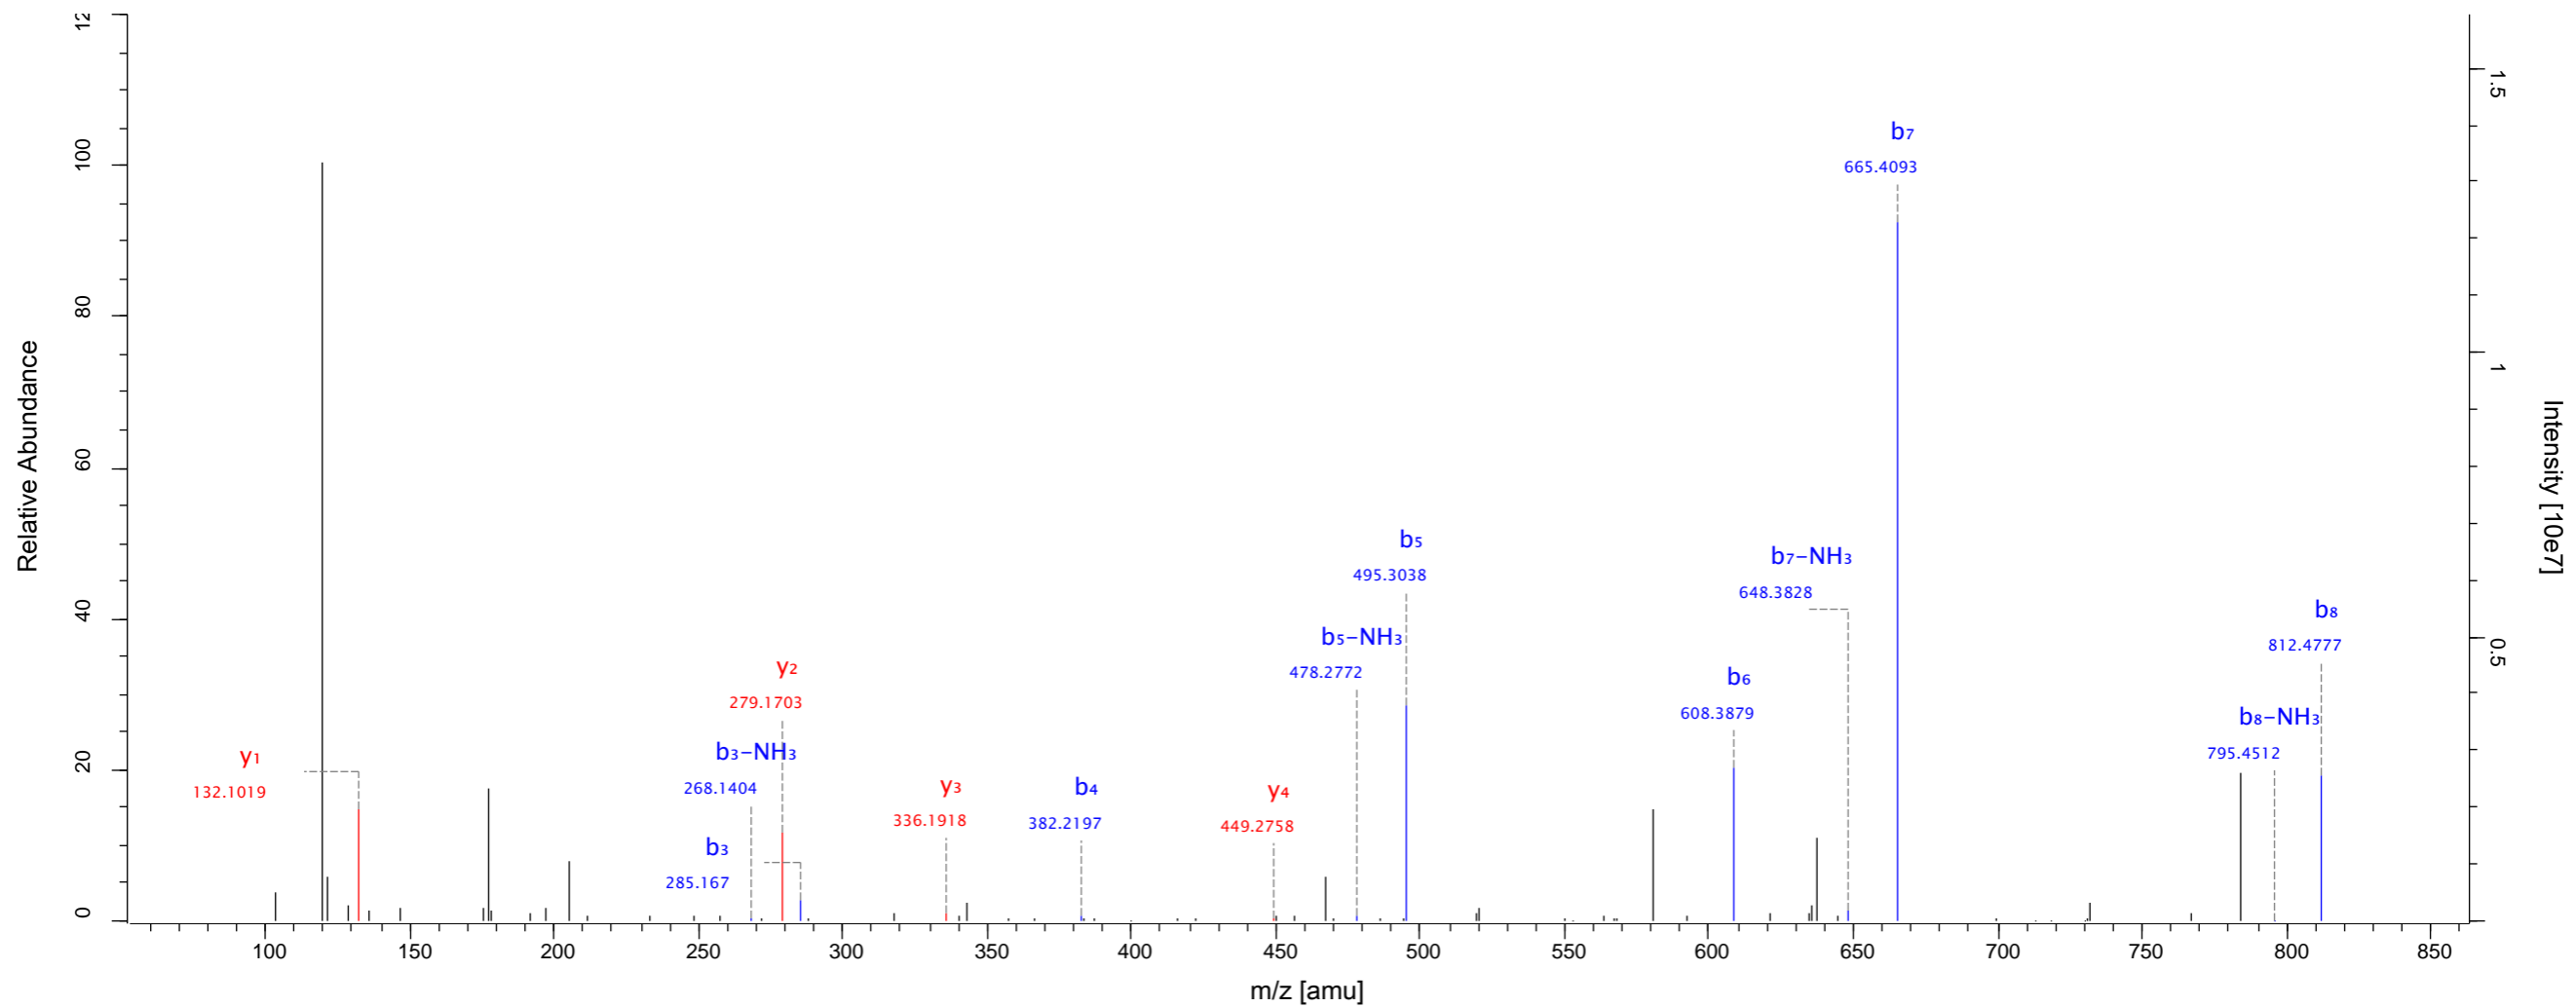

Raw file: 20111212\_EXQ5\_AnMi\_QC\_HCMVp1\_29  
Scan number: 55174  
Protein: ORFL299W + NC\_006273.2[185047,185685]+ <unknown description>  
Peptide score: 165.75  
Method: FTMS; HCD

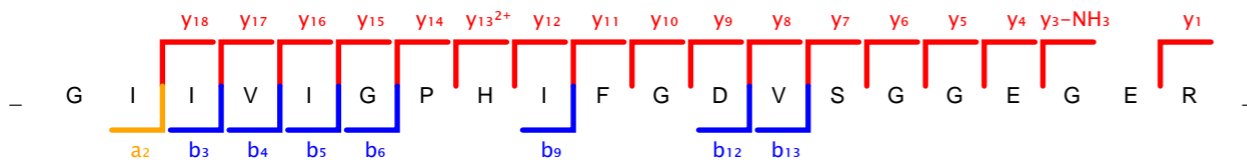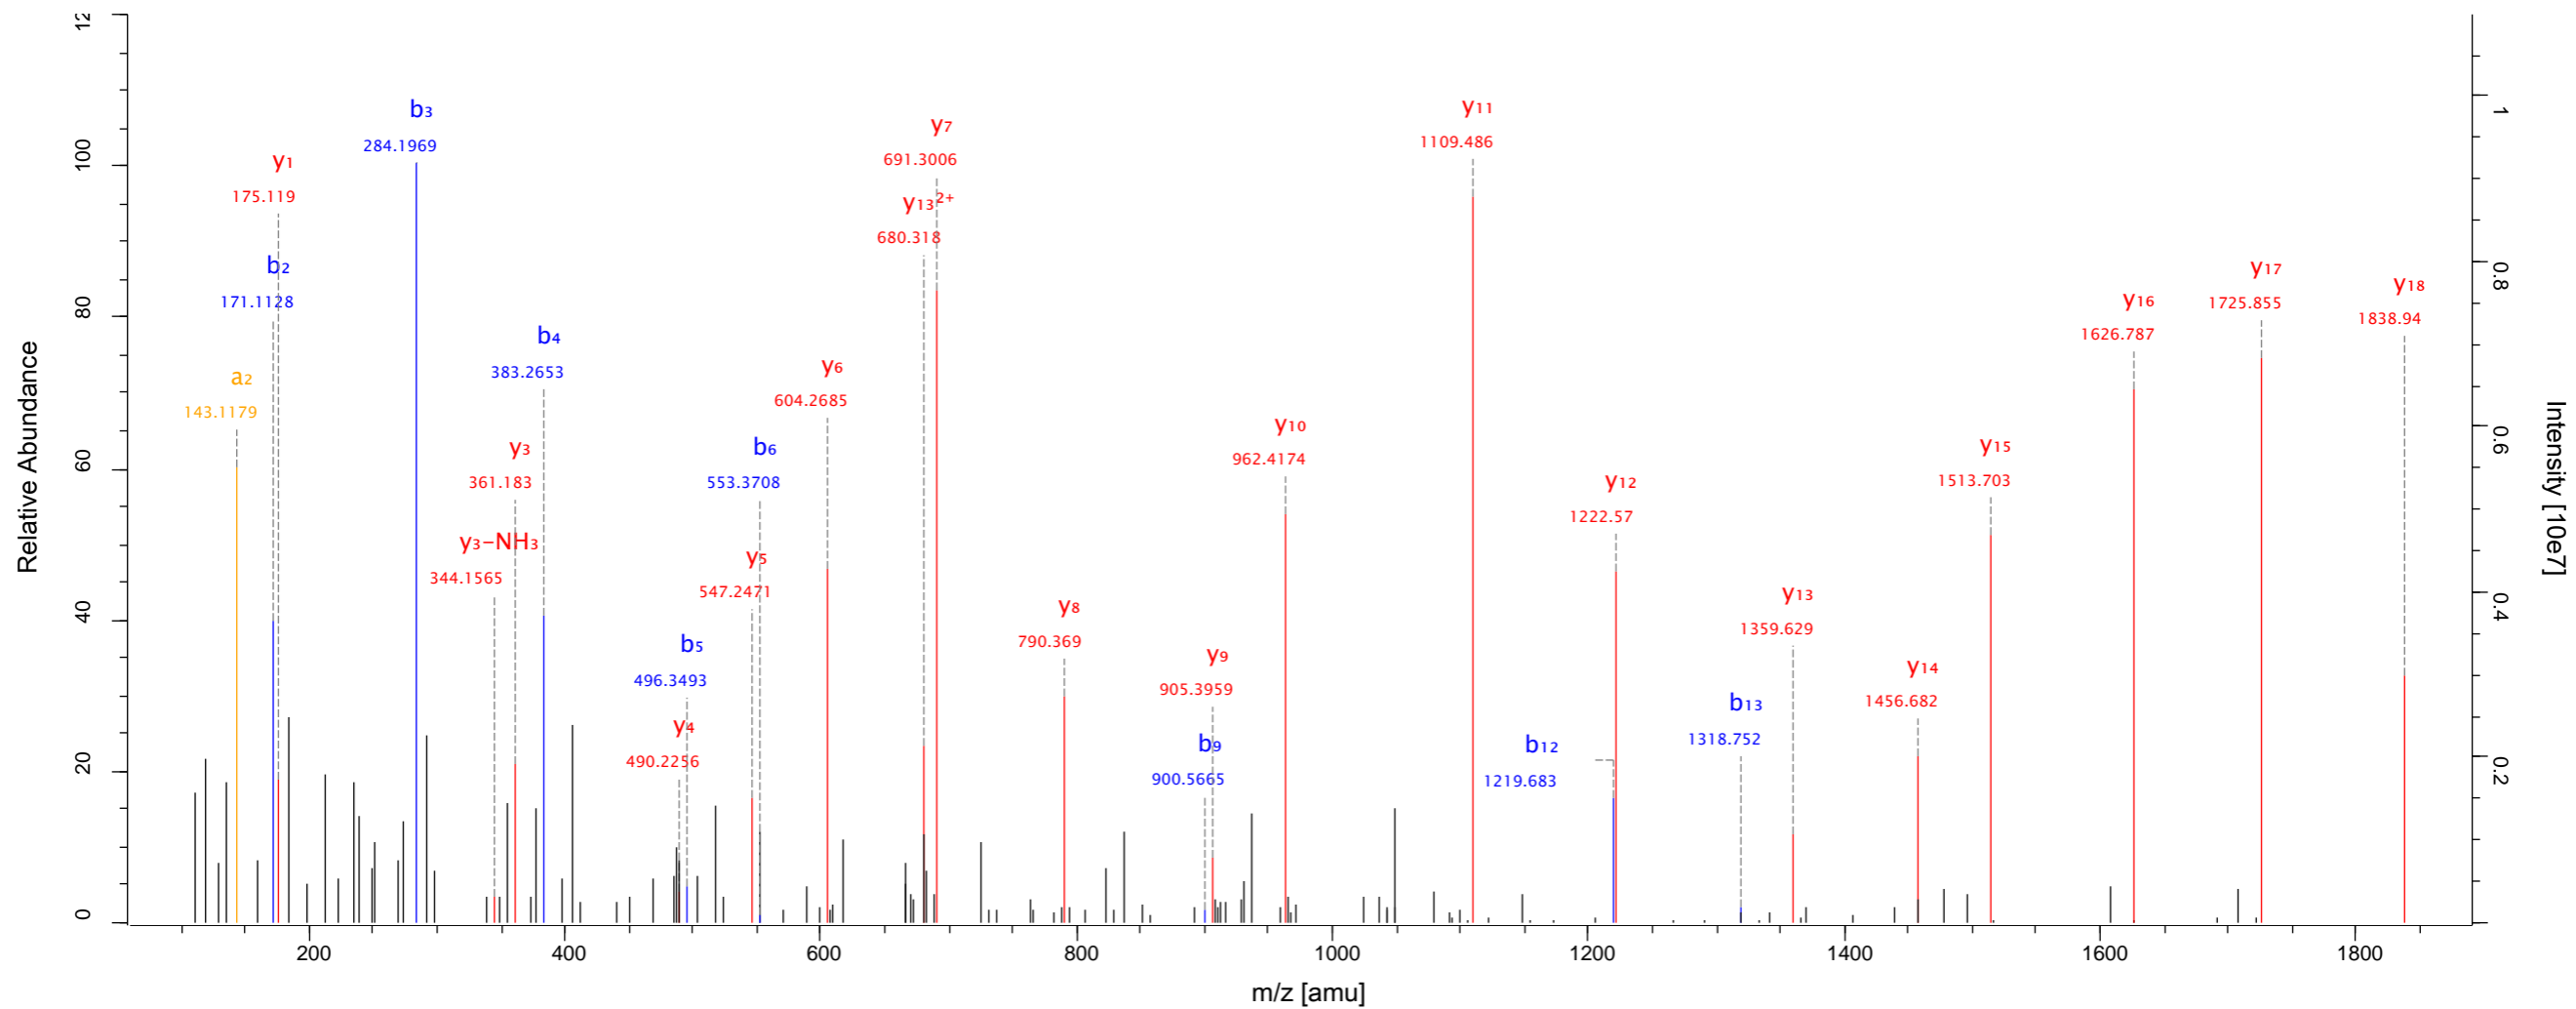

Raw file: 20111212\_EXQ5\_AnMi\_QC\_HCMVp1\_29  
 Scan number: 55615  
 Protein: ORFL299W + NC\_006273.2[185047,185685]+ <unknown description>  
 Peptide score: 167.99  
 Method: FTMS; HCD

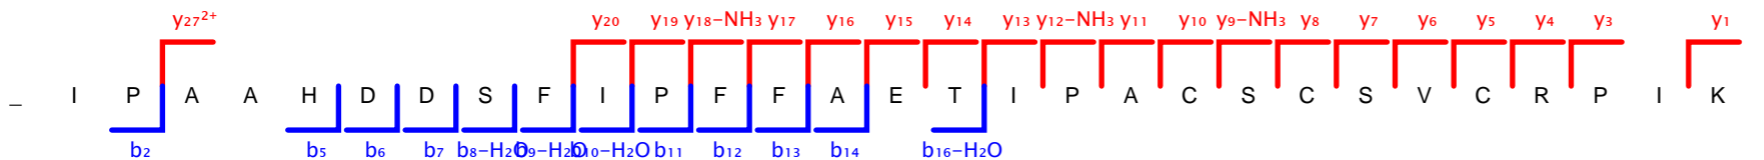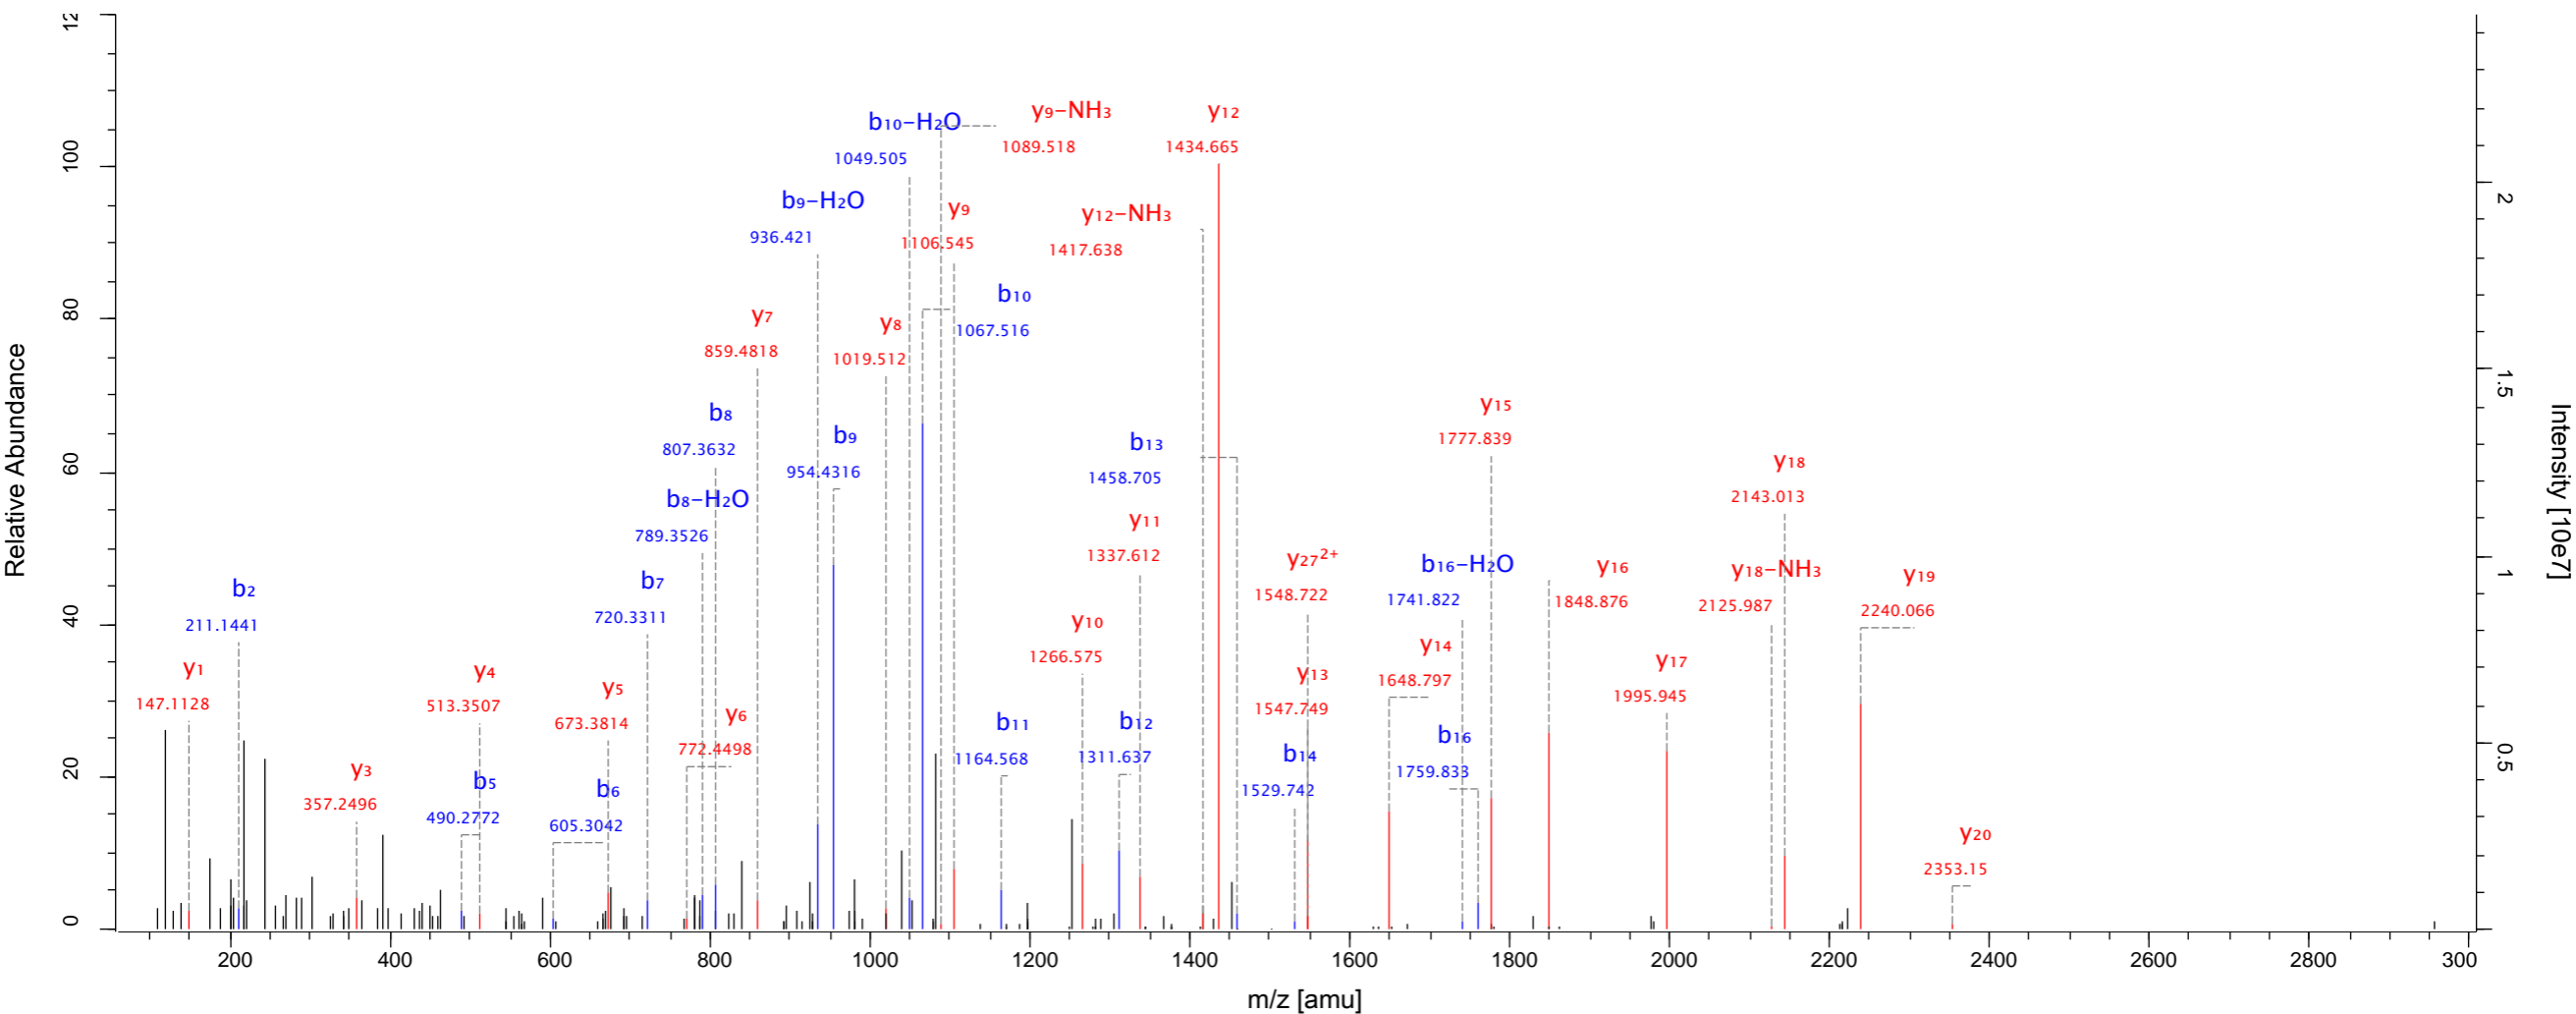

Raw file: 20111212\_EXQ5\_AnMi\_QC\_HCMVp11\_29  
Scan number: 7963  
Protein: ORFL82W + NC\_006273.2[36796,37488]+ <unknown description>  
Peptide score: 79.47  
Method: FTMS; HCD

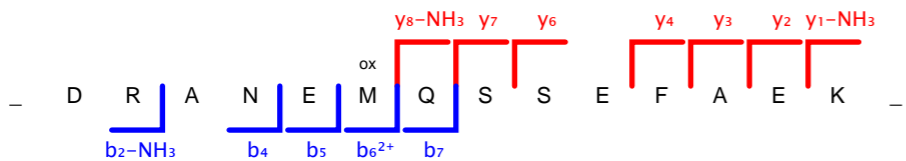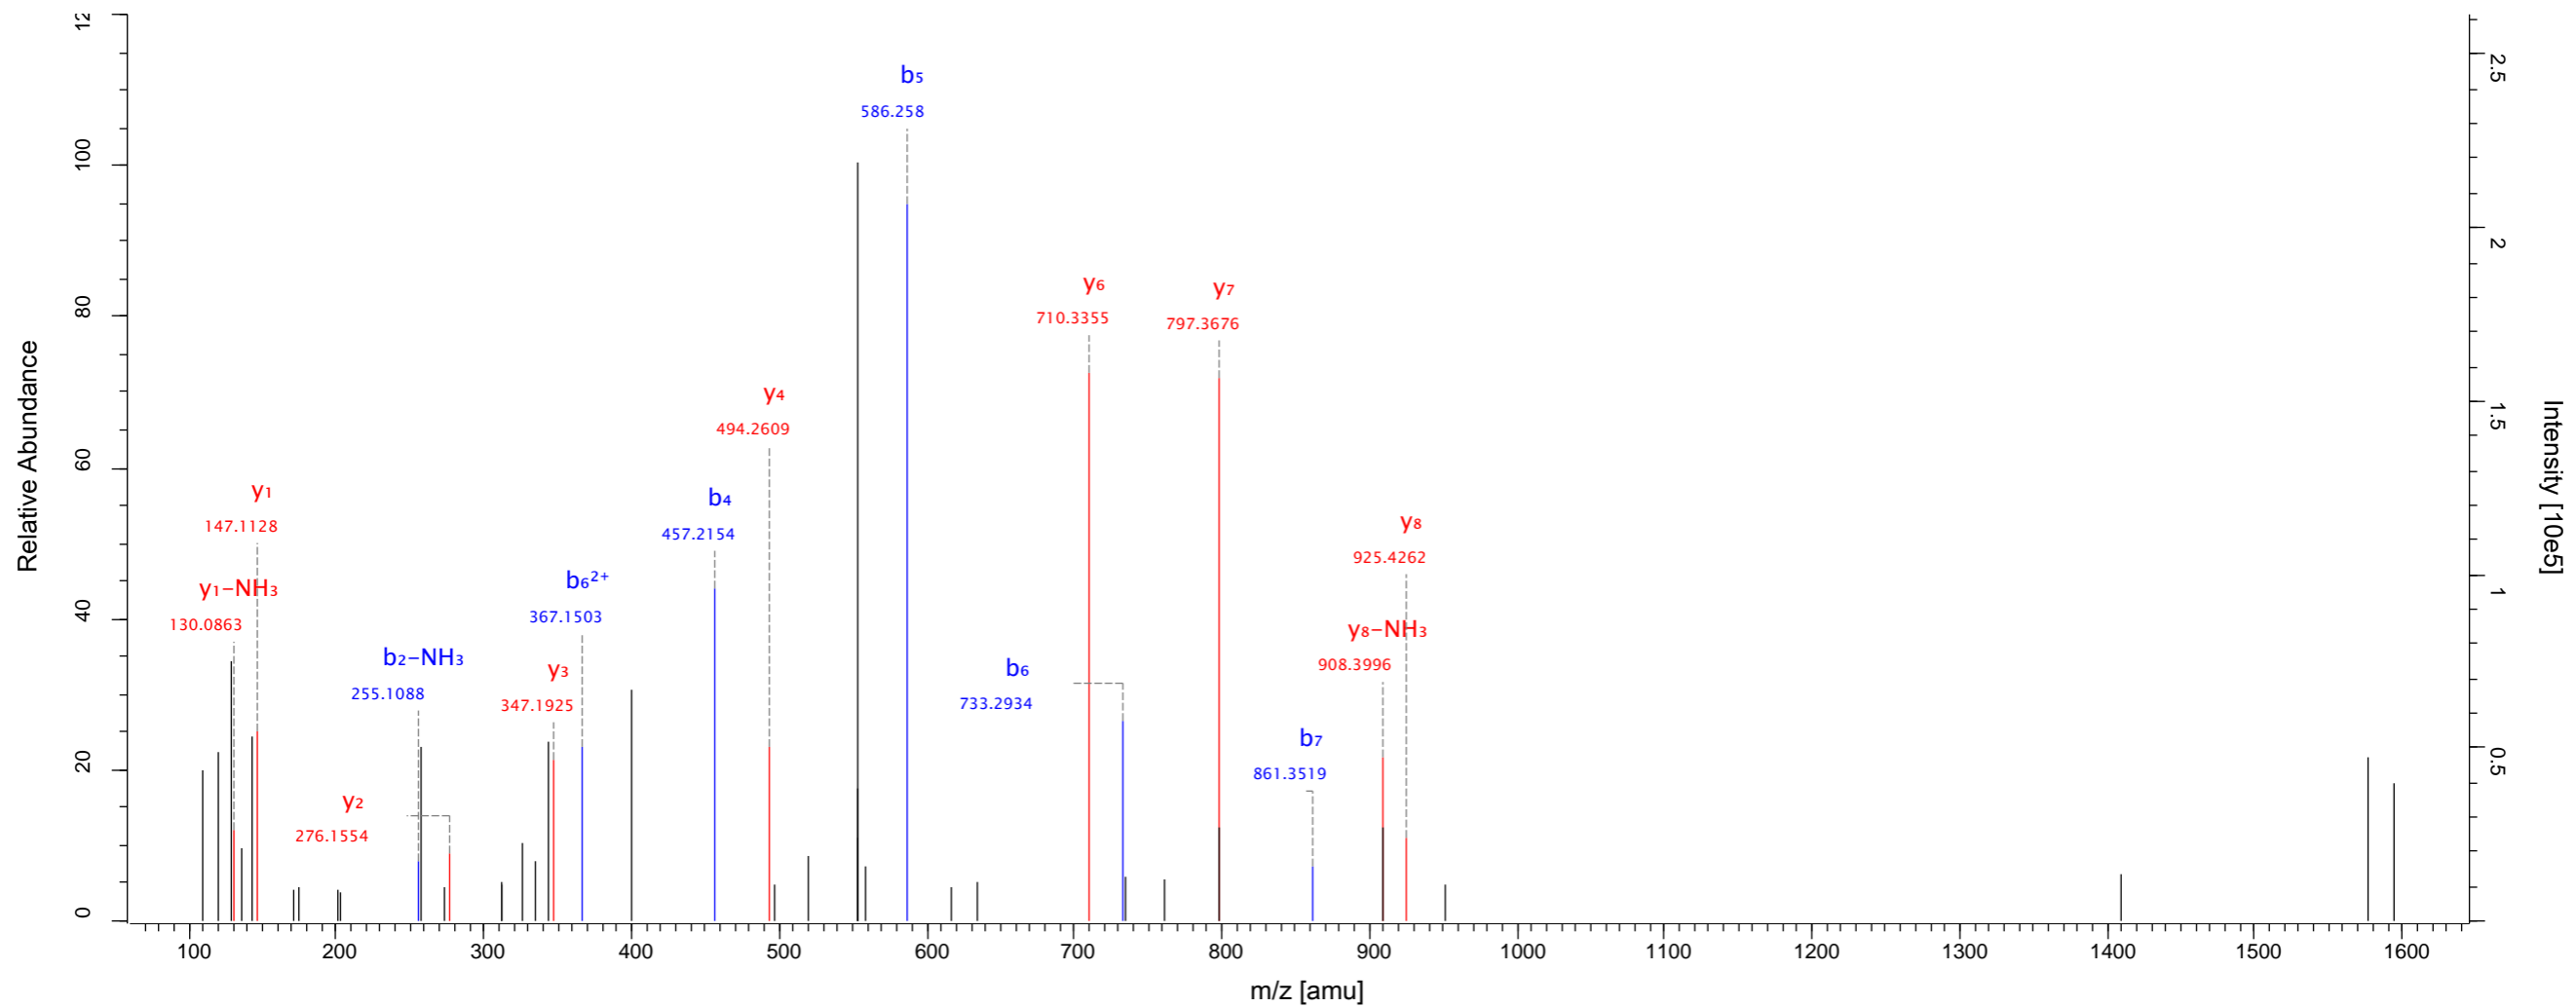

Raw file: 20111212\_EXQ5\_AnMi\_QC\_HCMVp11\_29  
Scan number: 9374  
Protein: ORFL299W + NC\_006273.2[185047,185685]+ <unknown description>  
Peptide score: 97.46  
Method: FTMS; HCD

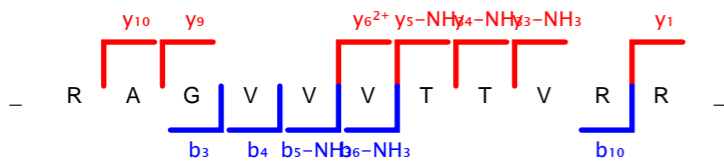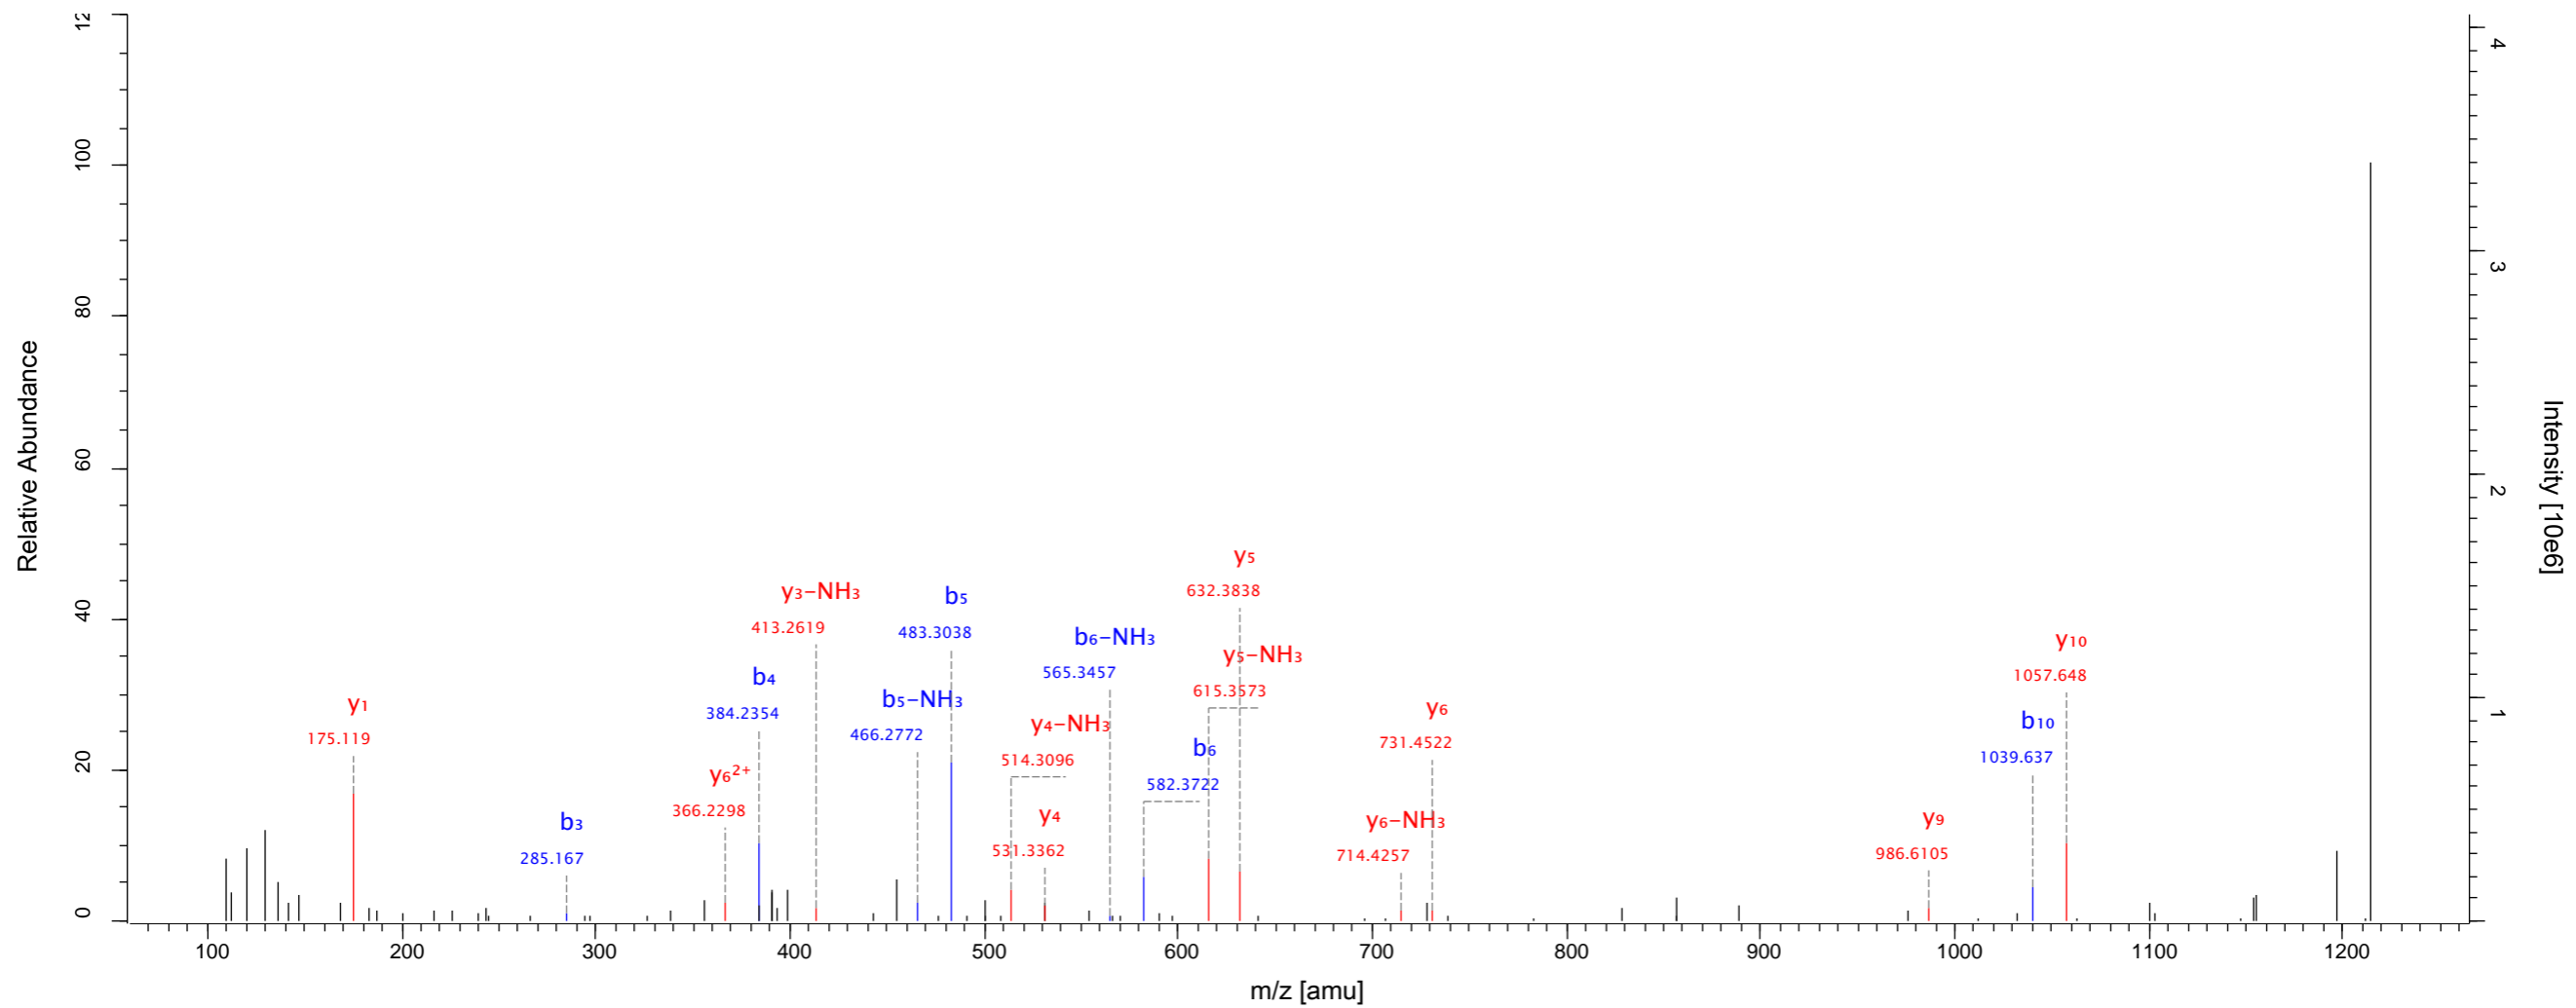

Raw file: 20111212\_EXQ5\_AnMi\_QC\_HCMVp11\_29  
Scan number: 9573  
Protein: ORFL82W + NC\_006273.2[36796,37488]+ <unknown description>  
Peptide score: 133.91  
Method: FTMS; HCD

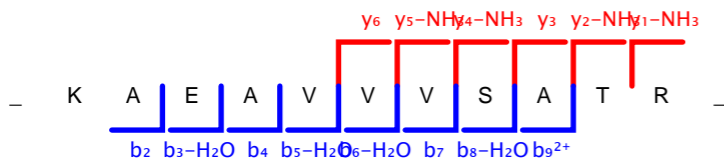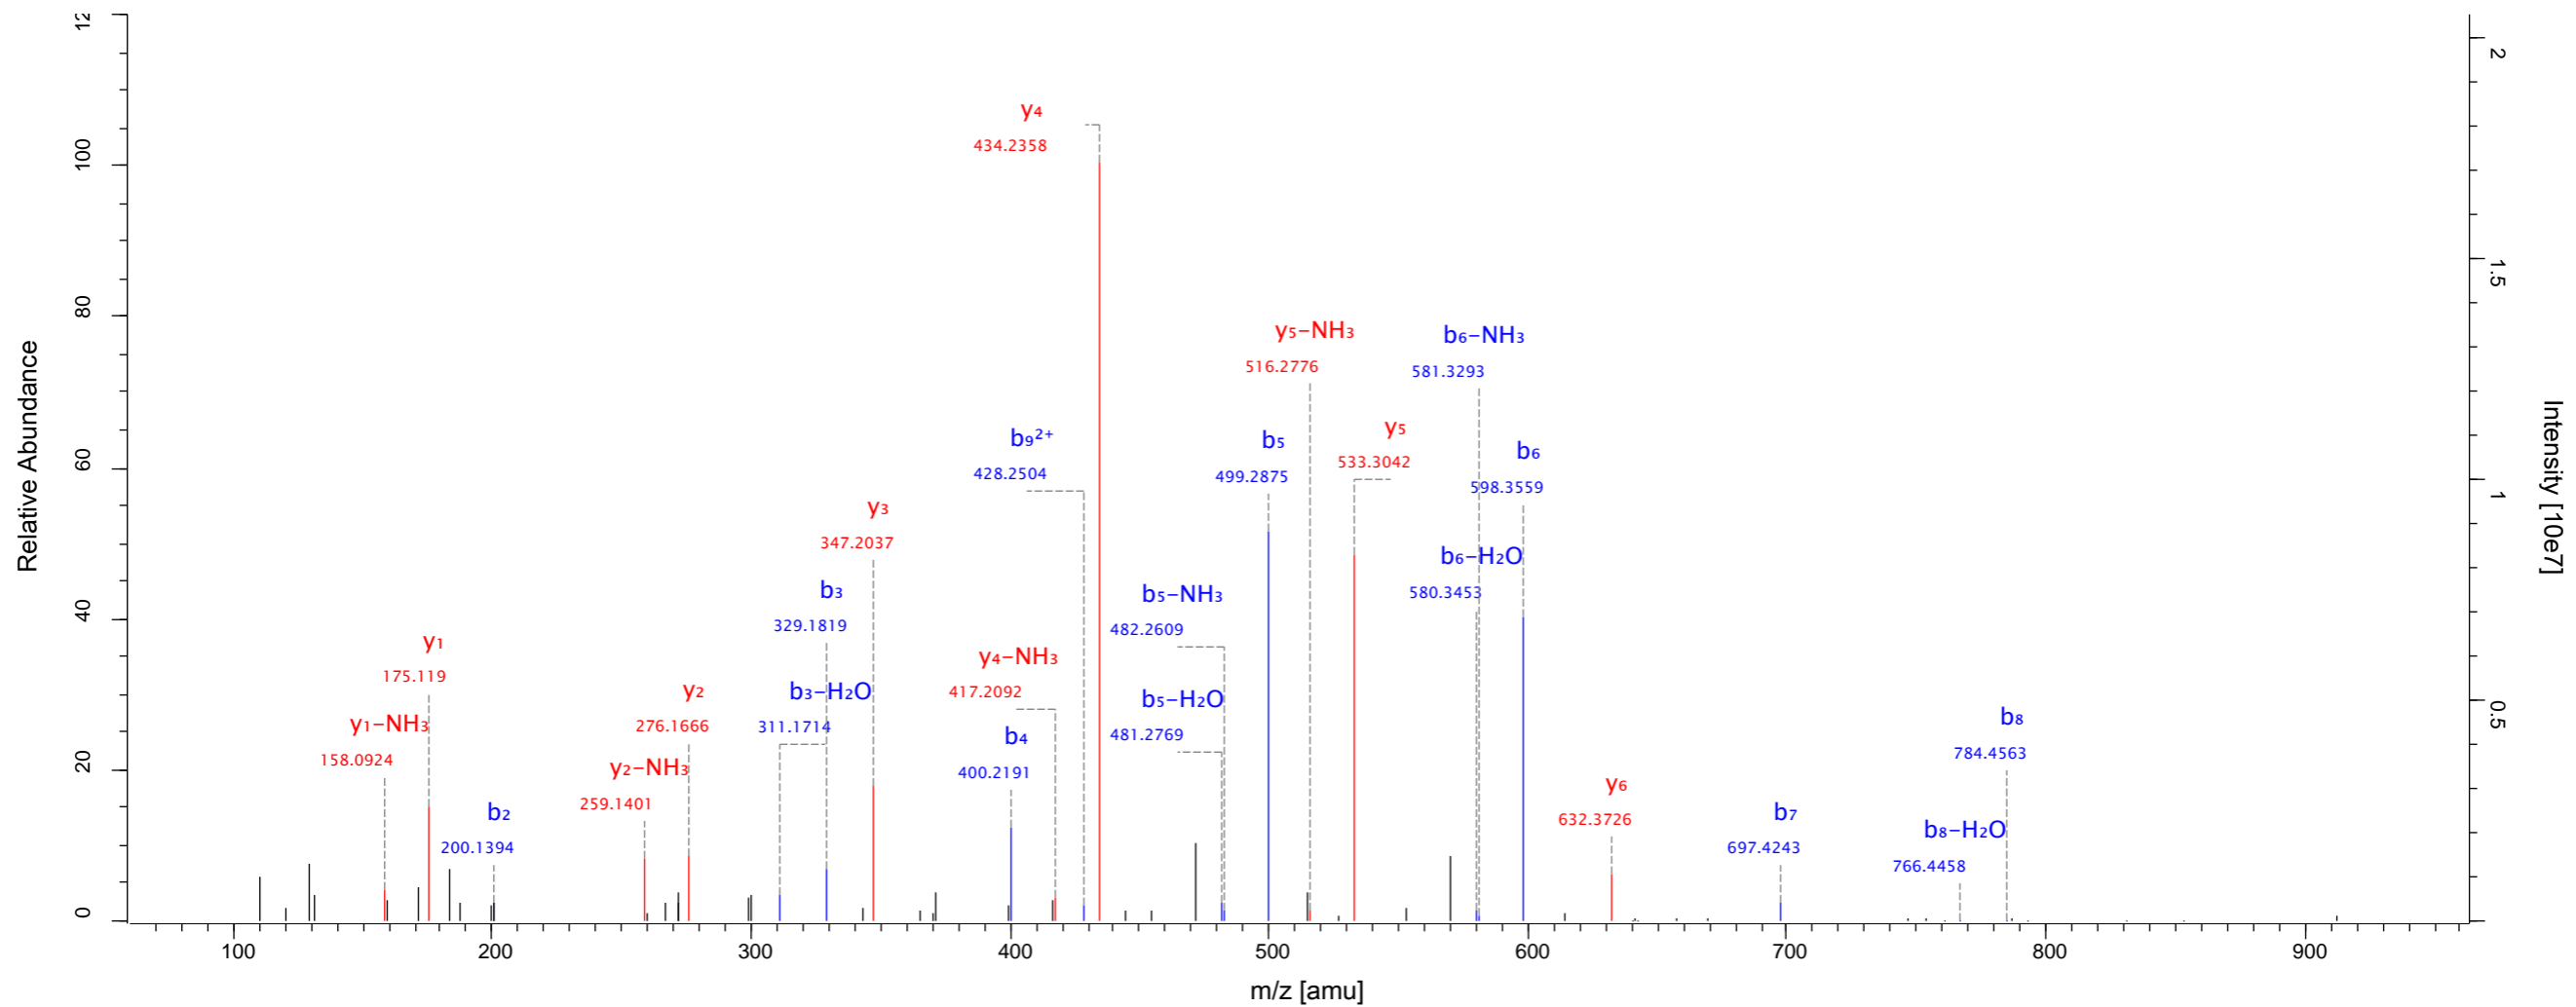



Raw file: 20111212\_EXQ5\_AnMi\_QC\_HCMVp1\_30

Scan number: 13072

Protein: ORFL321W + NC\_006273.2[191968,194126]+ <unknown description>; ORFL321W.iORF1 + NC\_006273.2[191968,194126]+ <unknown description>; ORFL321W.iORF4 + NC\_006273.2[193200,194126]+ <unknown description>

Peptide score: 187.58

Method: FTMS; HCD

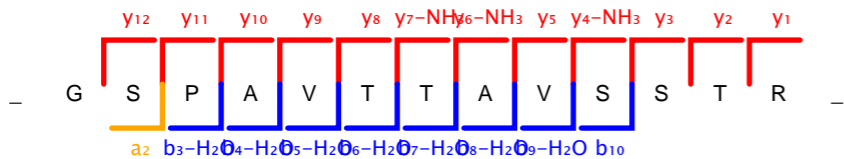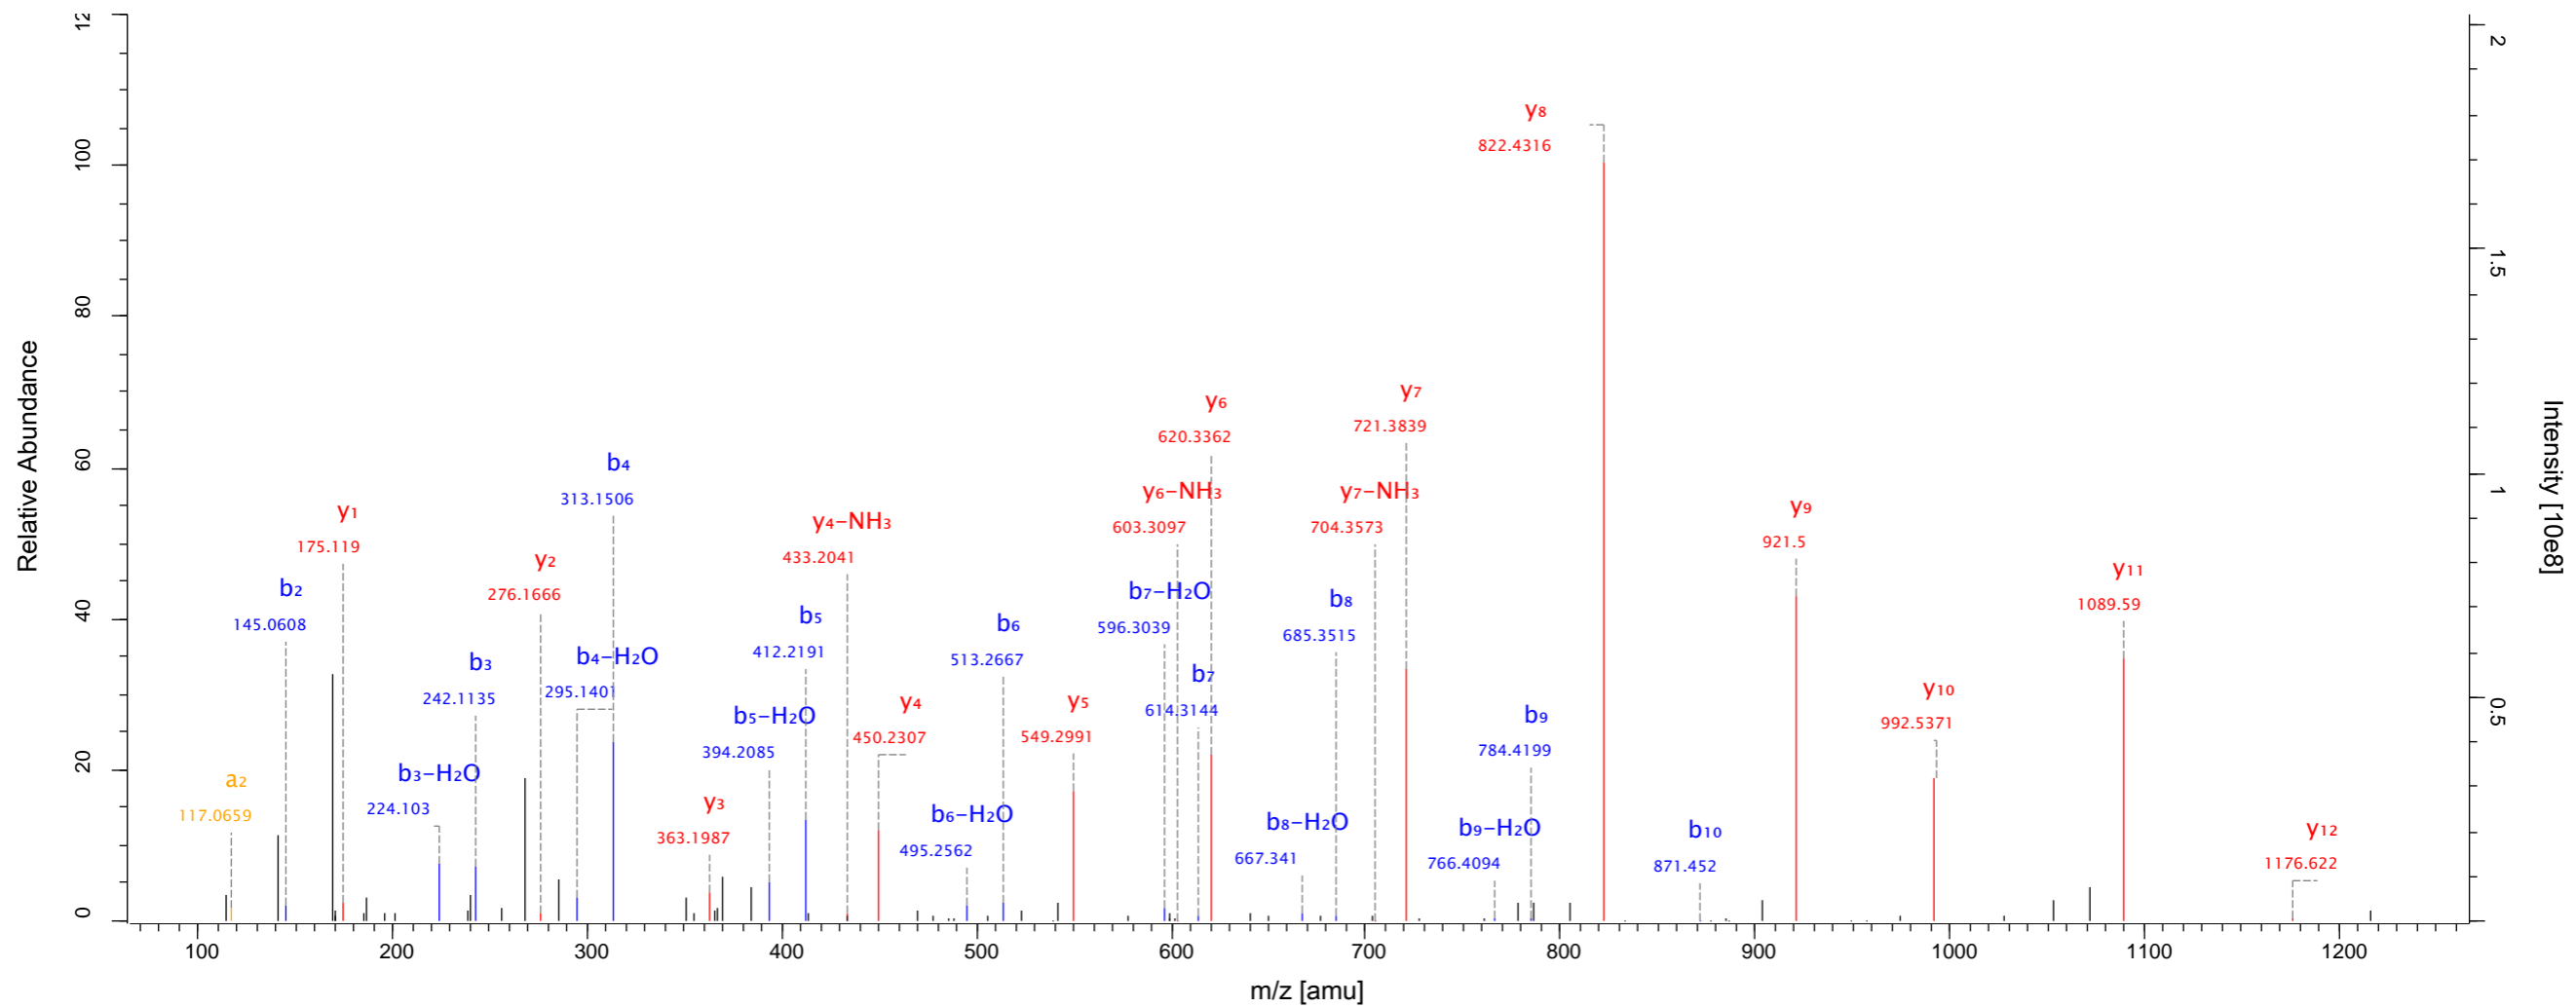

Raw file: 20111212\_EXQ5\_AnMi\_QC\_HCMVpl1\_30  
 Scan number: 14968  
 Protein: ORFL131W + NC\_006273.2[73147,73947]+ <unknown description>; ORFL131W.iORF1 + NC\_006273.2[73294,73947]+ <unknown description>  
 Peptide score: 221.55  
 Method: FTMS; HCD

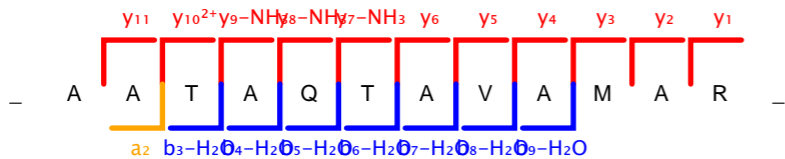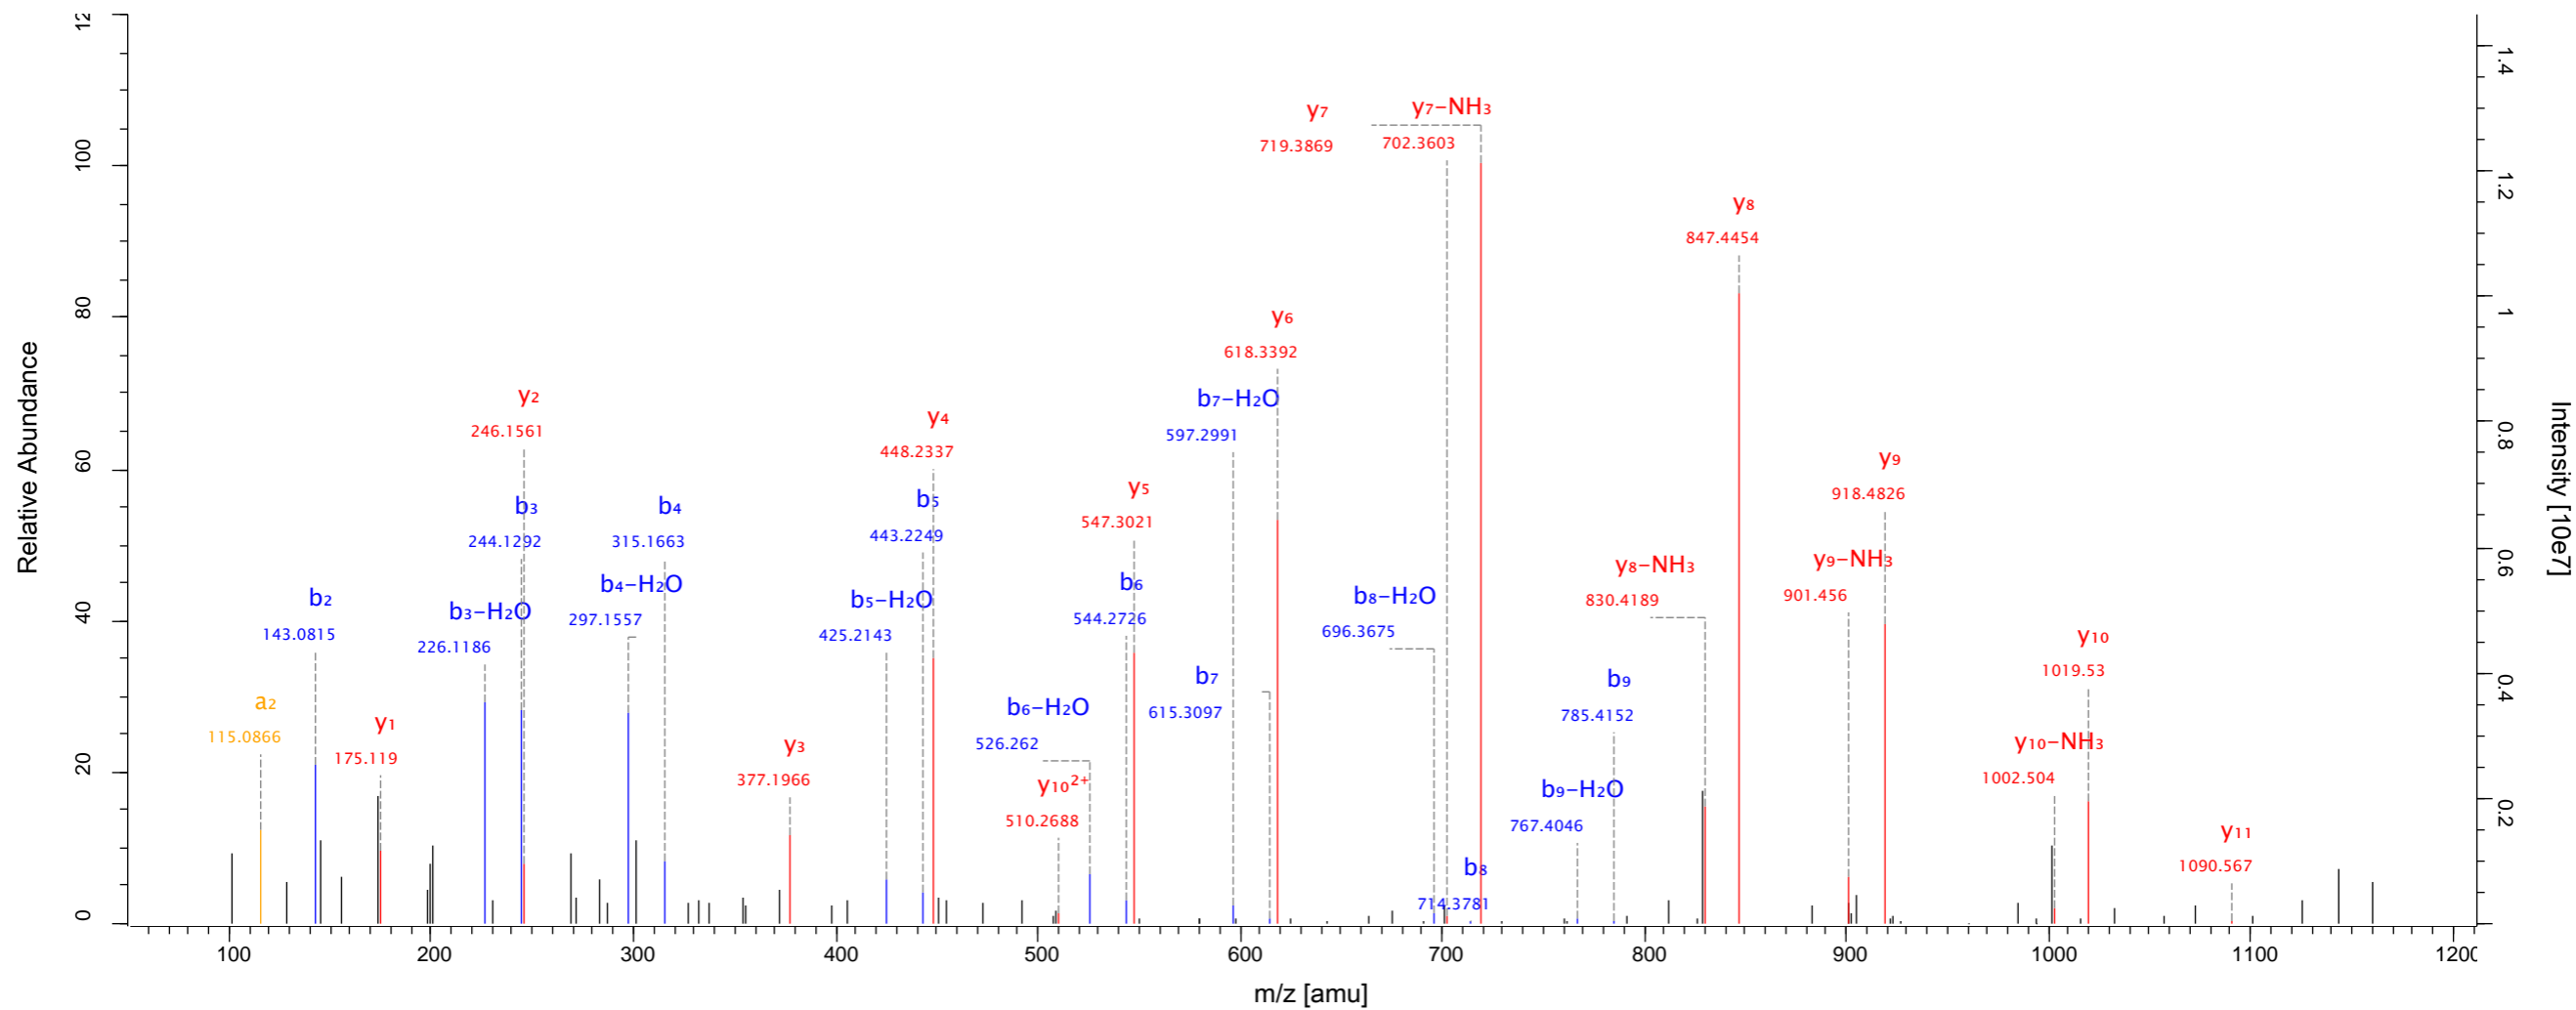

Raw file: 20111212\_EXQ5\_AnMi\_QC\_HCMVp1\_30  
Scan number: 21371  
Protein: ORFL147C - NC\_006273.2[85932,87362]- <unknown description>  
Peptide score: 124.98  
Method: FTMS; HCD

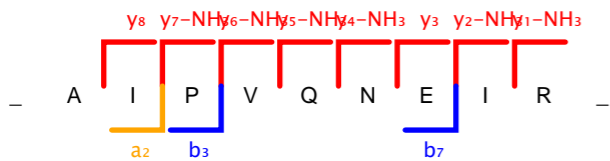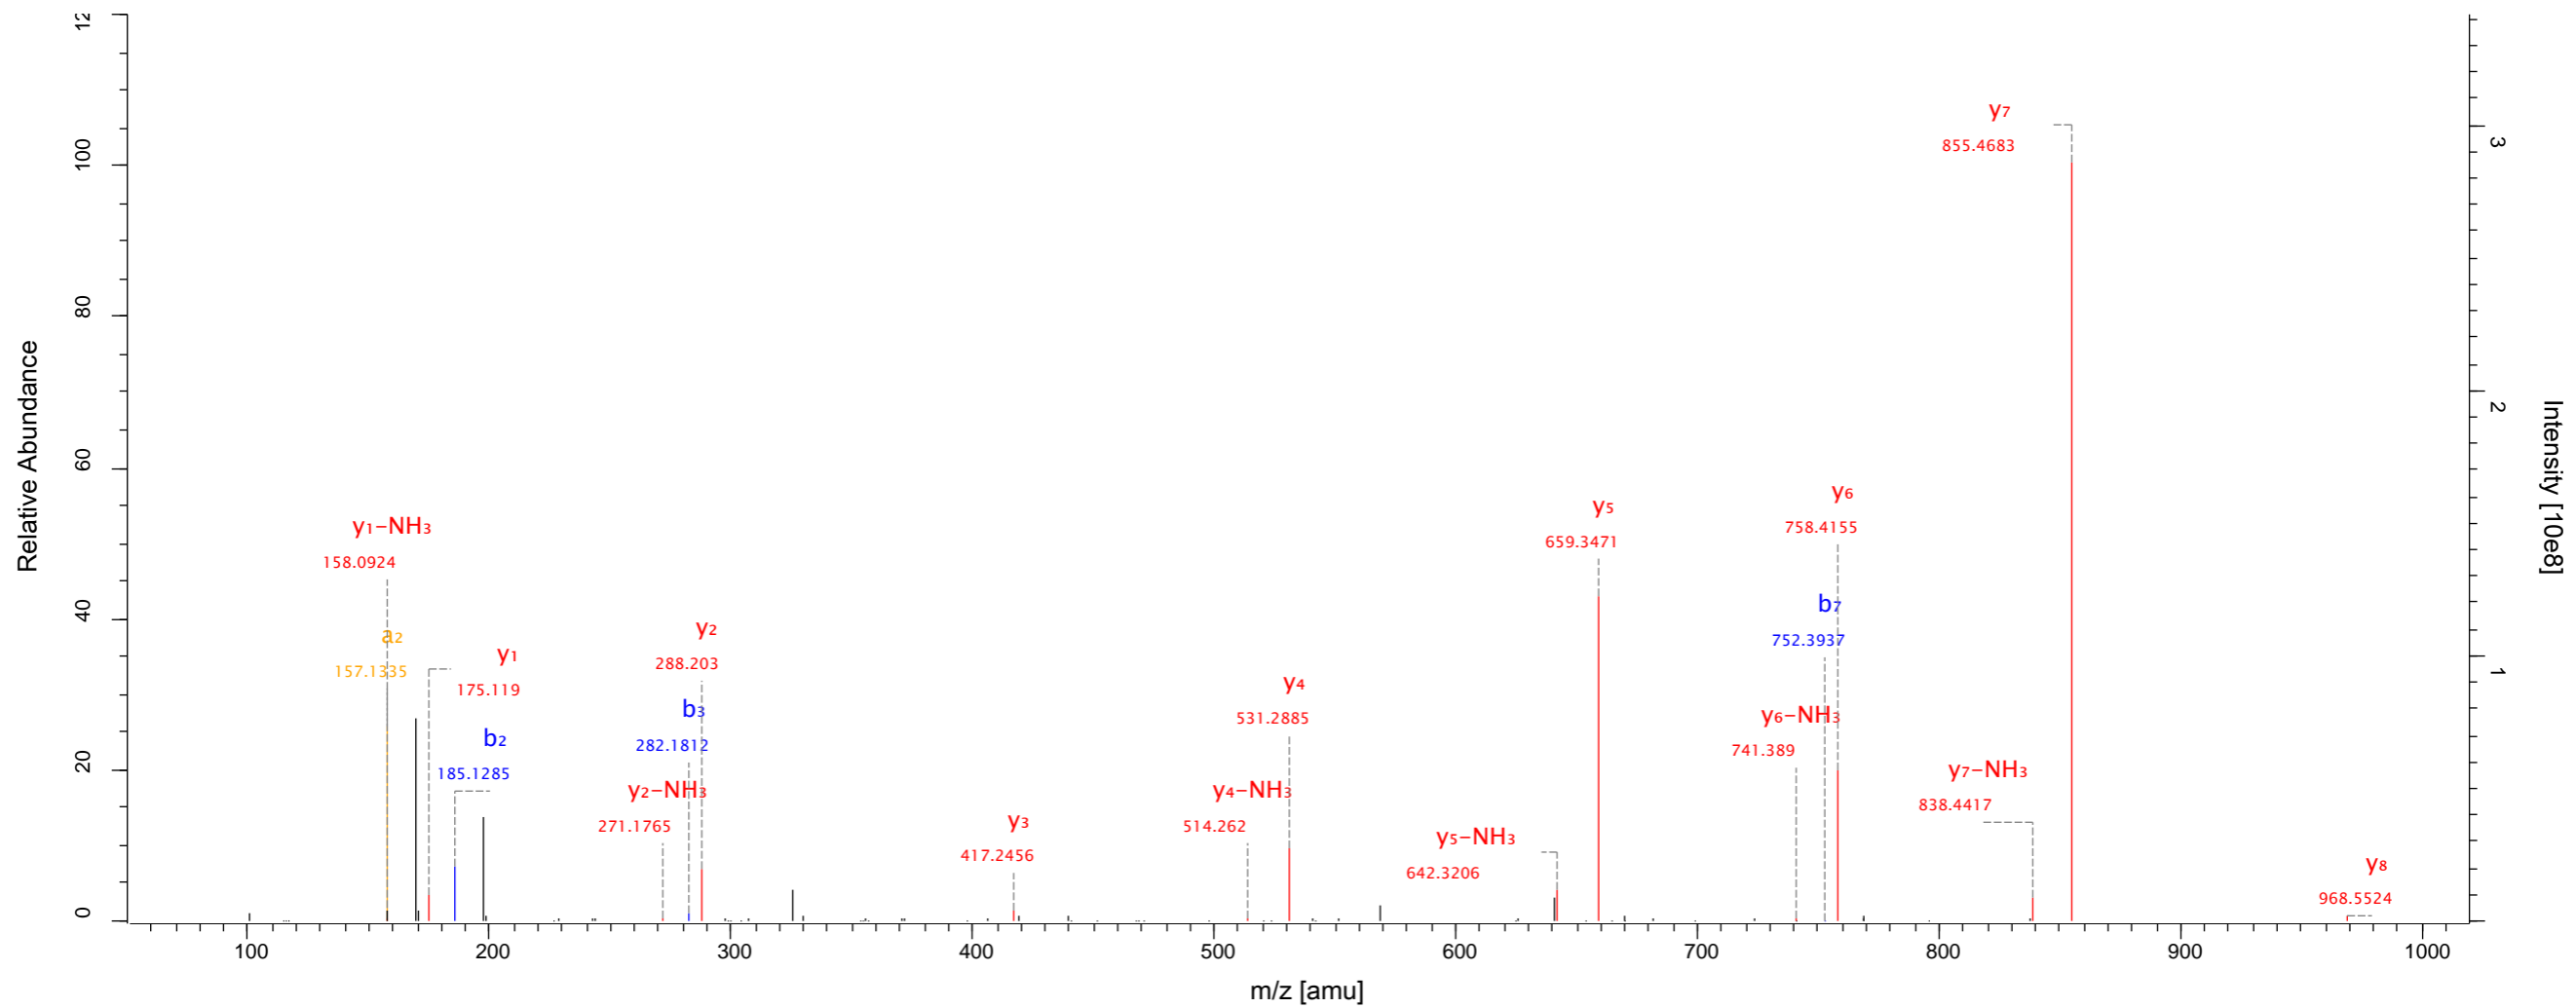

Raw file: 20111212\_EXQ5\_AnMi\_QC\_HCMVp11\_30  
 Scan number: 22176  
 Protein: ORFL131W + NC\_006273.2[73147,73947]+ <unknown description>; ORFL131W.iORF1 + NC\_006273.2[73294,73947]+ <unknown description>  
 Peptide score: 136.66  
 Method: FTMS; HCD

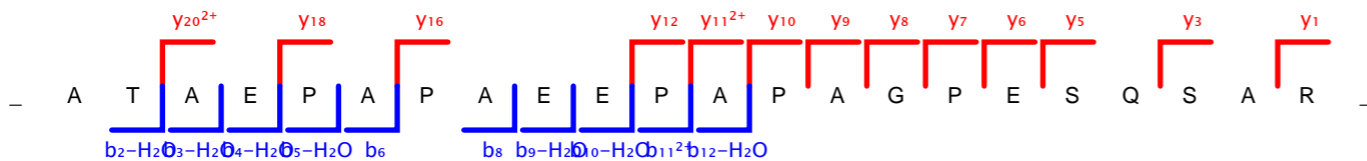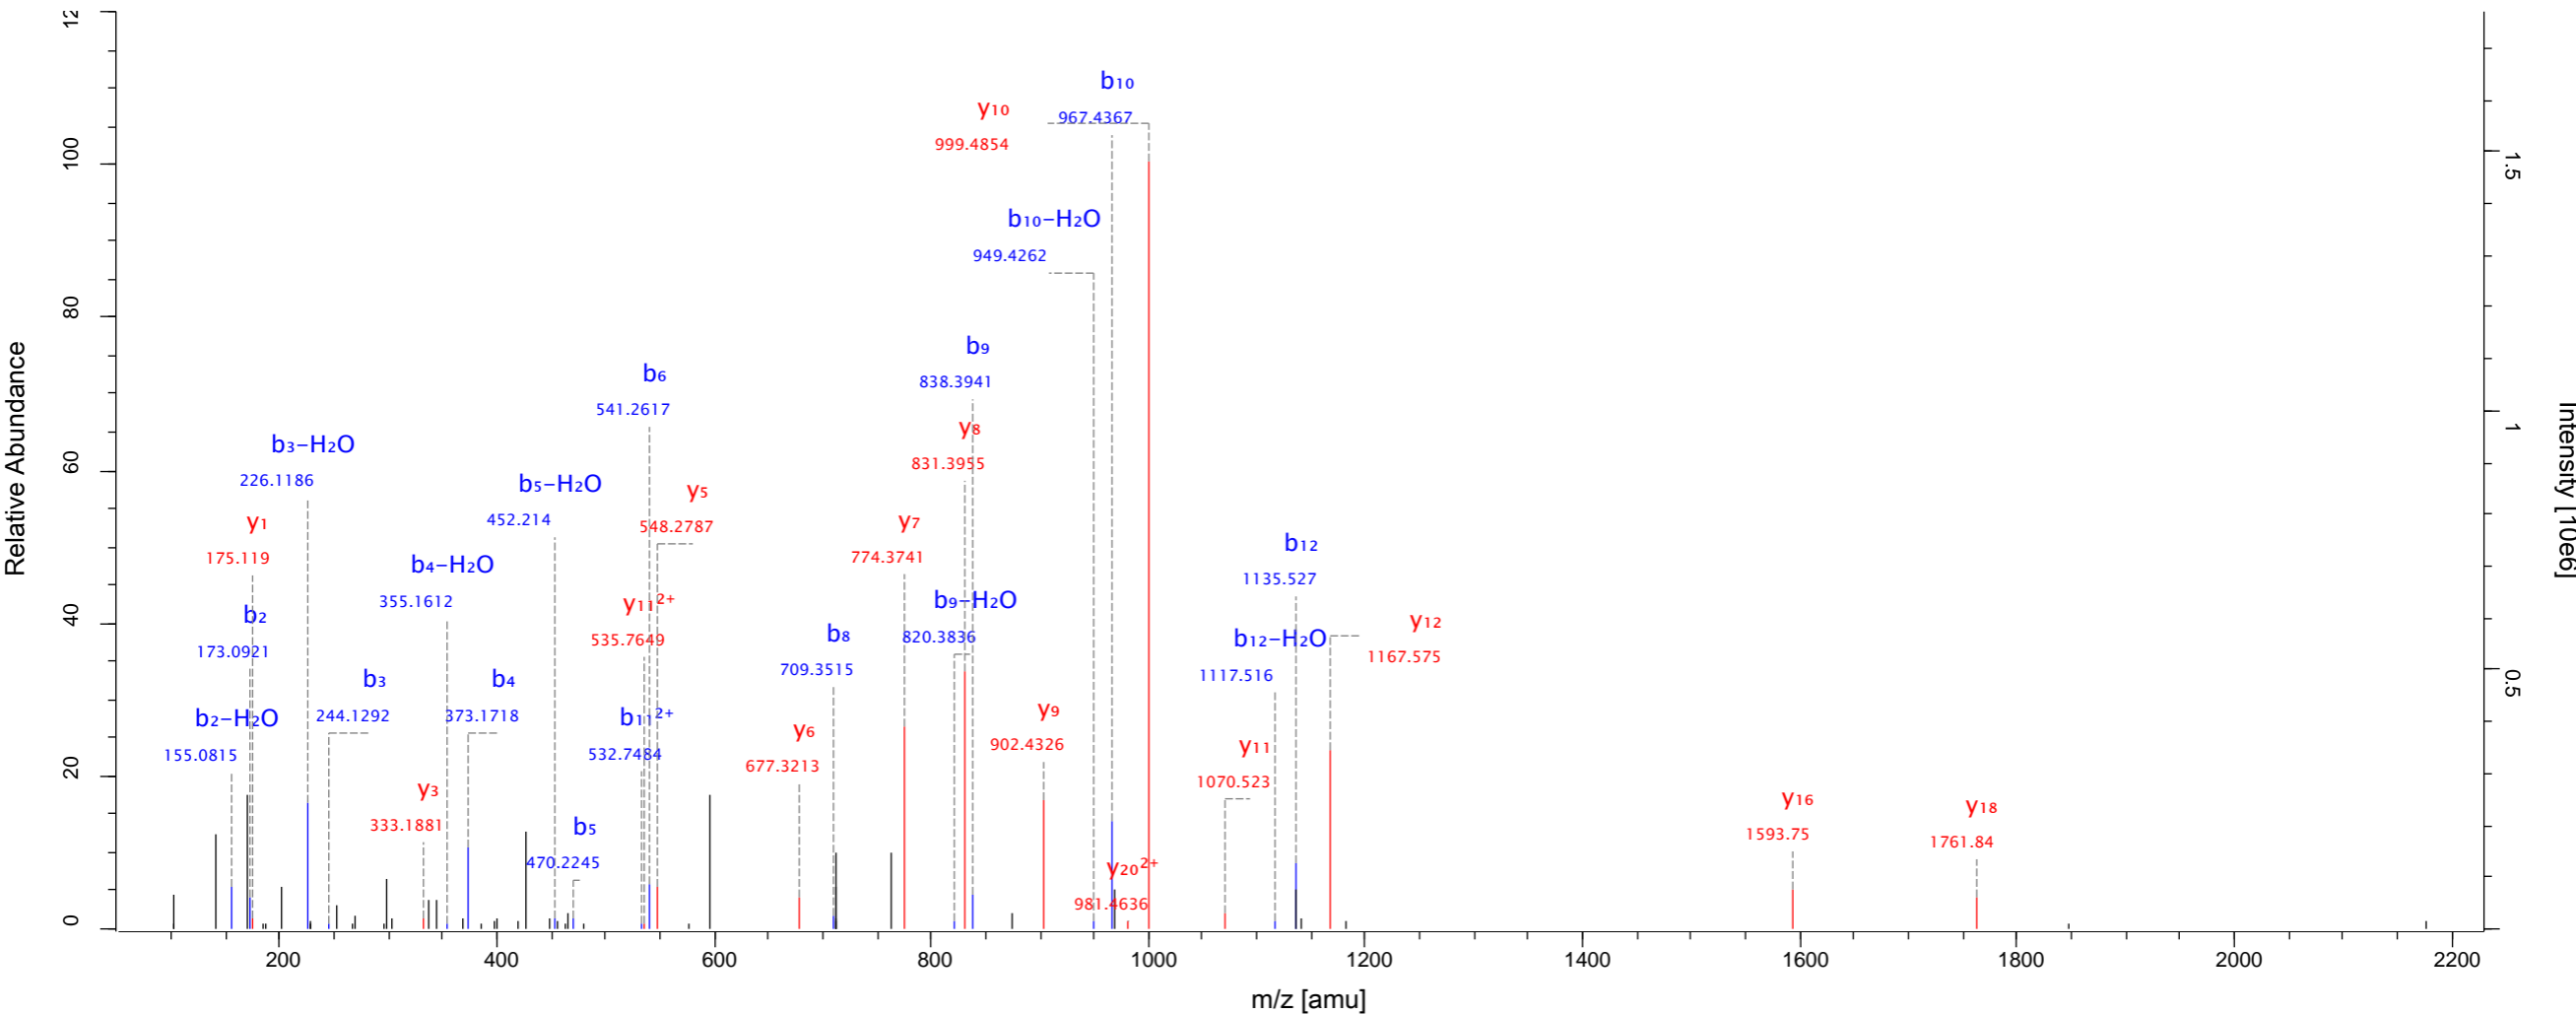

Raw file: 20111212\_EXQ5\_AnMi\_QC\_HCMVp1\_30  
 Scan number: 26222  
 Protein: ORFL71C - NC\_006273.2[29278,30408]- <unknown description>; ORFL71C.iORF1 - NC\_006273.2[29278,30354]- <unknown description>  
 Peptide score: 140.1  
 Method: FTMS; HCD

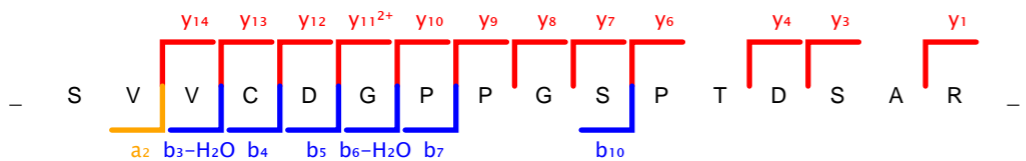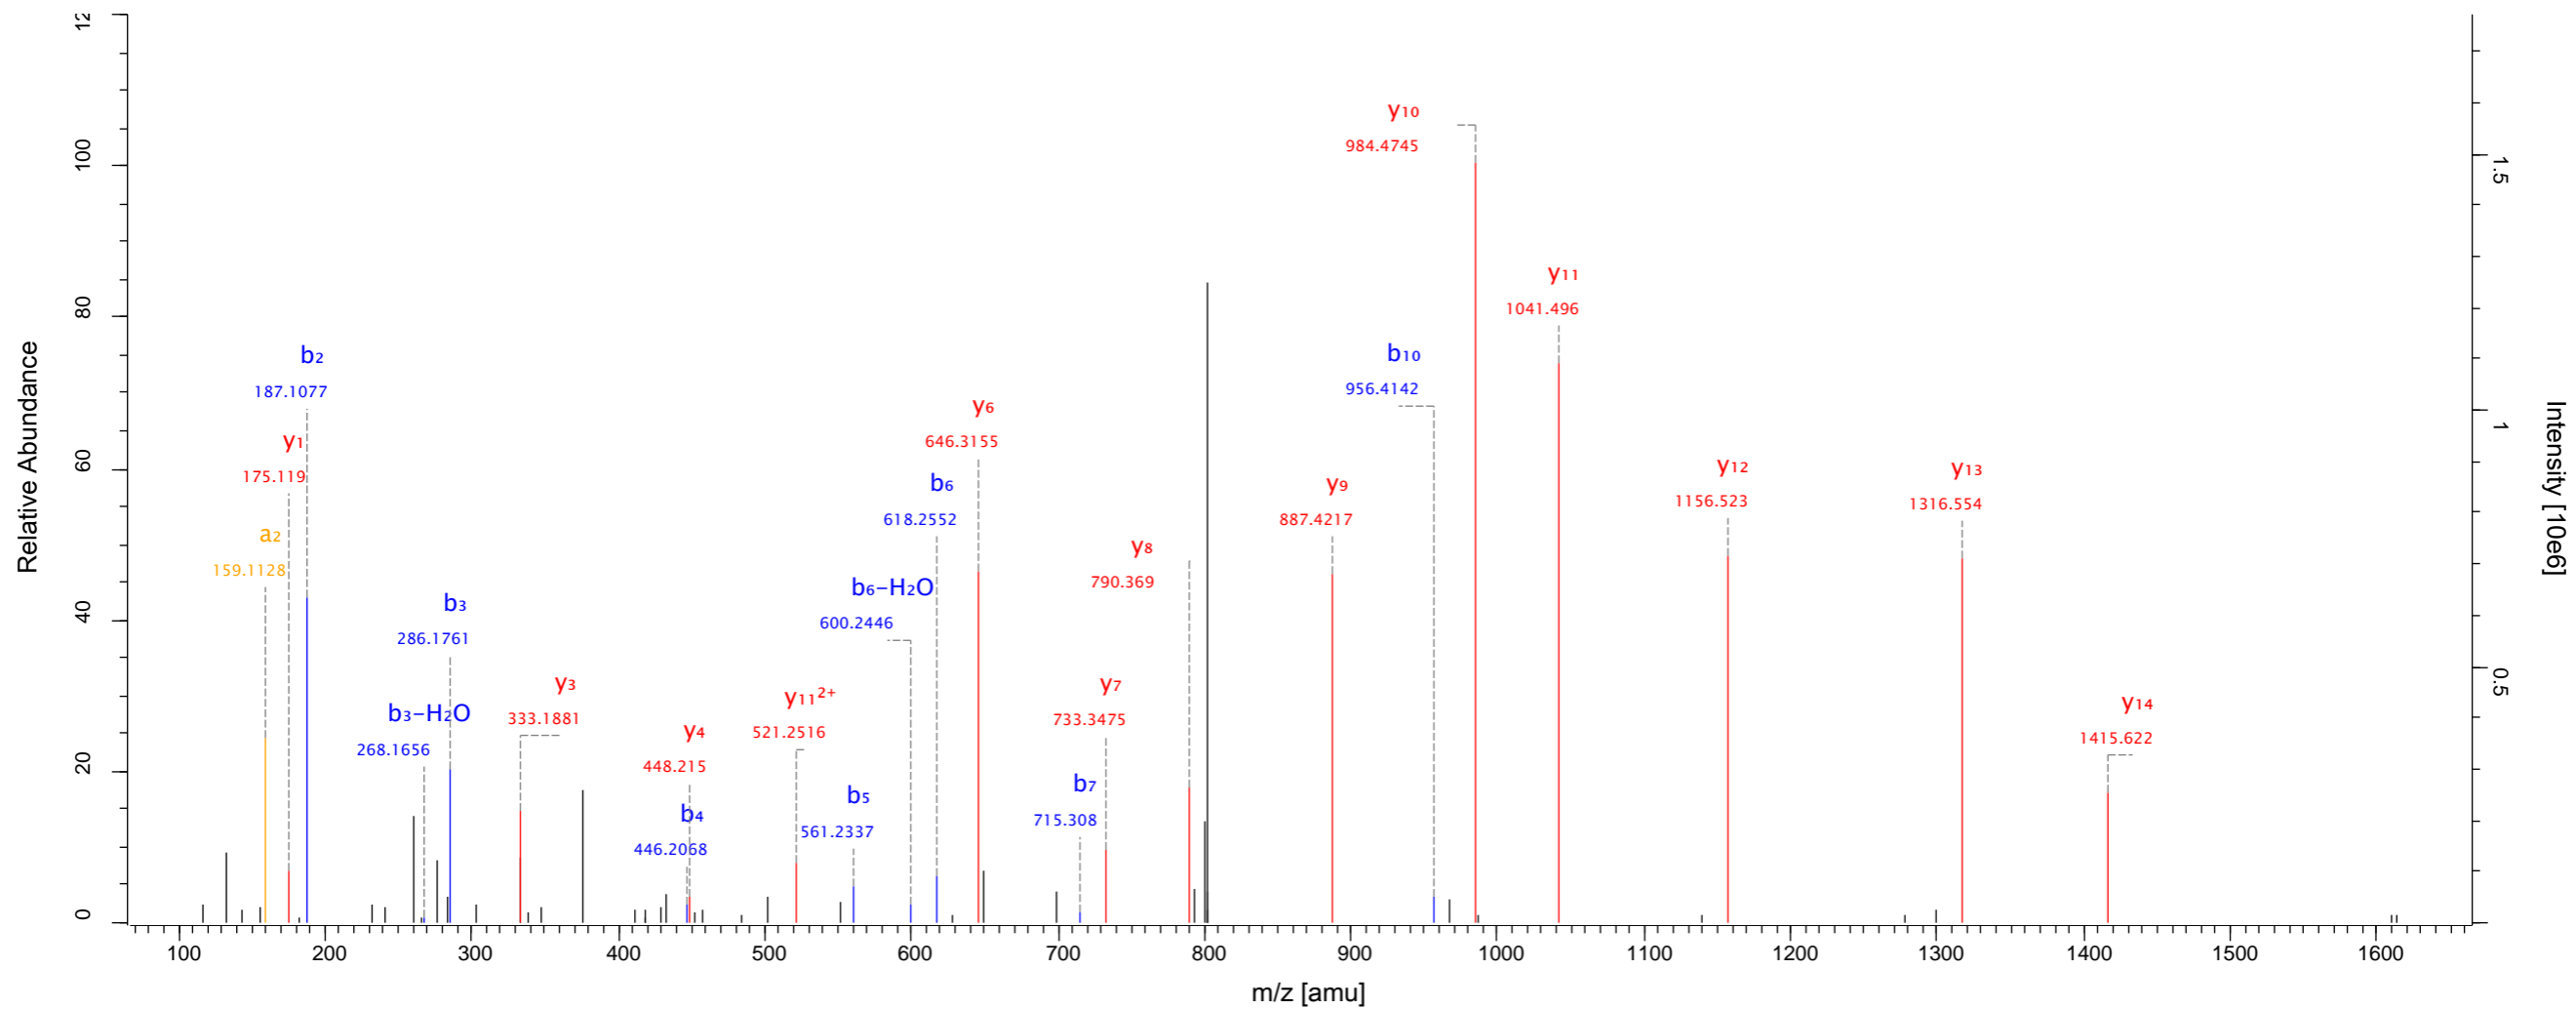

Raw file: 20111212\_EXQ5\_AnMi\_QC\_HCMVp11\_30

Scan number: 39700

Protein: ORFL131W + NC\_006273.2[73147,73947]+ <unknown description>; ORFL131W.iORF1 + NC\_006273.2[73294,73947]+ <unknown description>; ORFL131W.iORF2 + NC\_006273.2[73501,73947]+ <unknown description>

Peptide score: 118.21

Method: FTMS; HCD

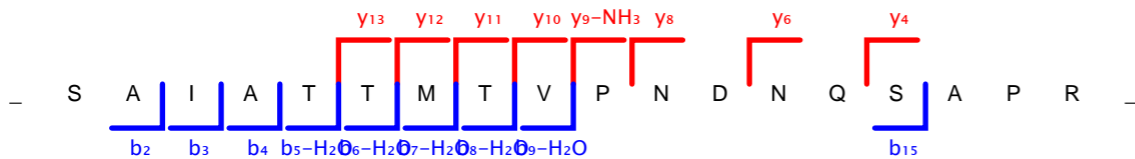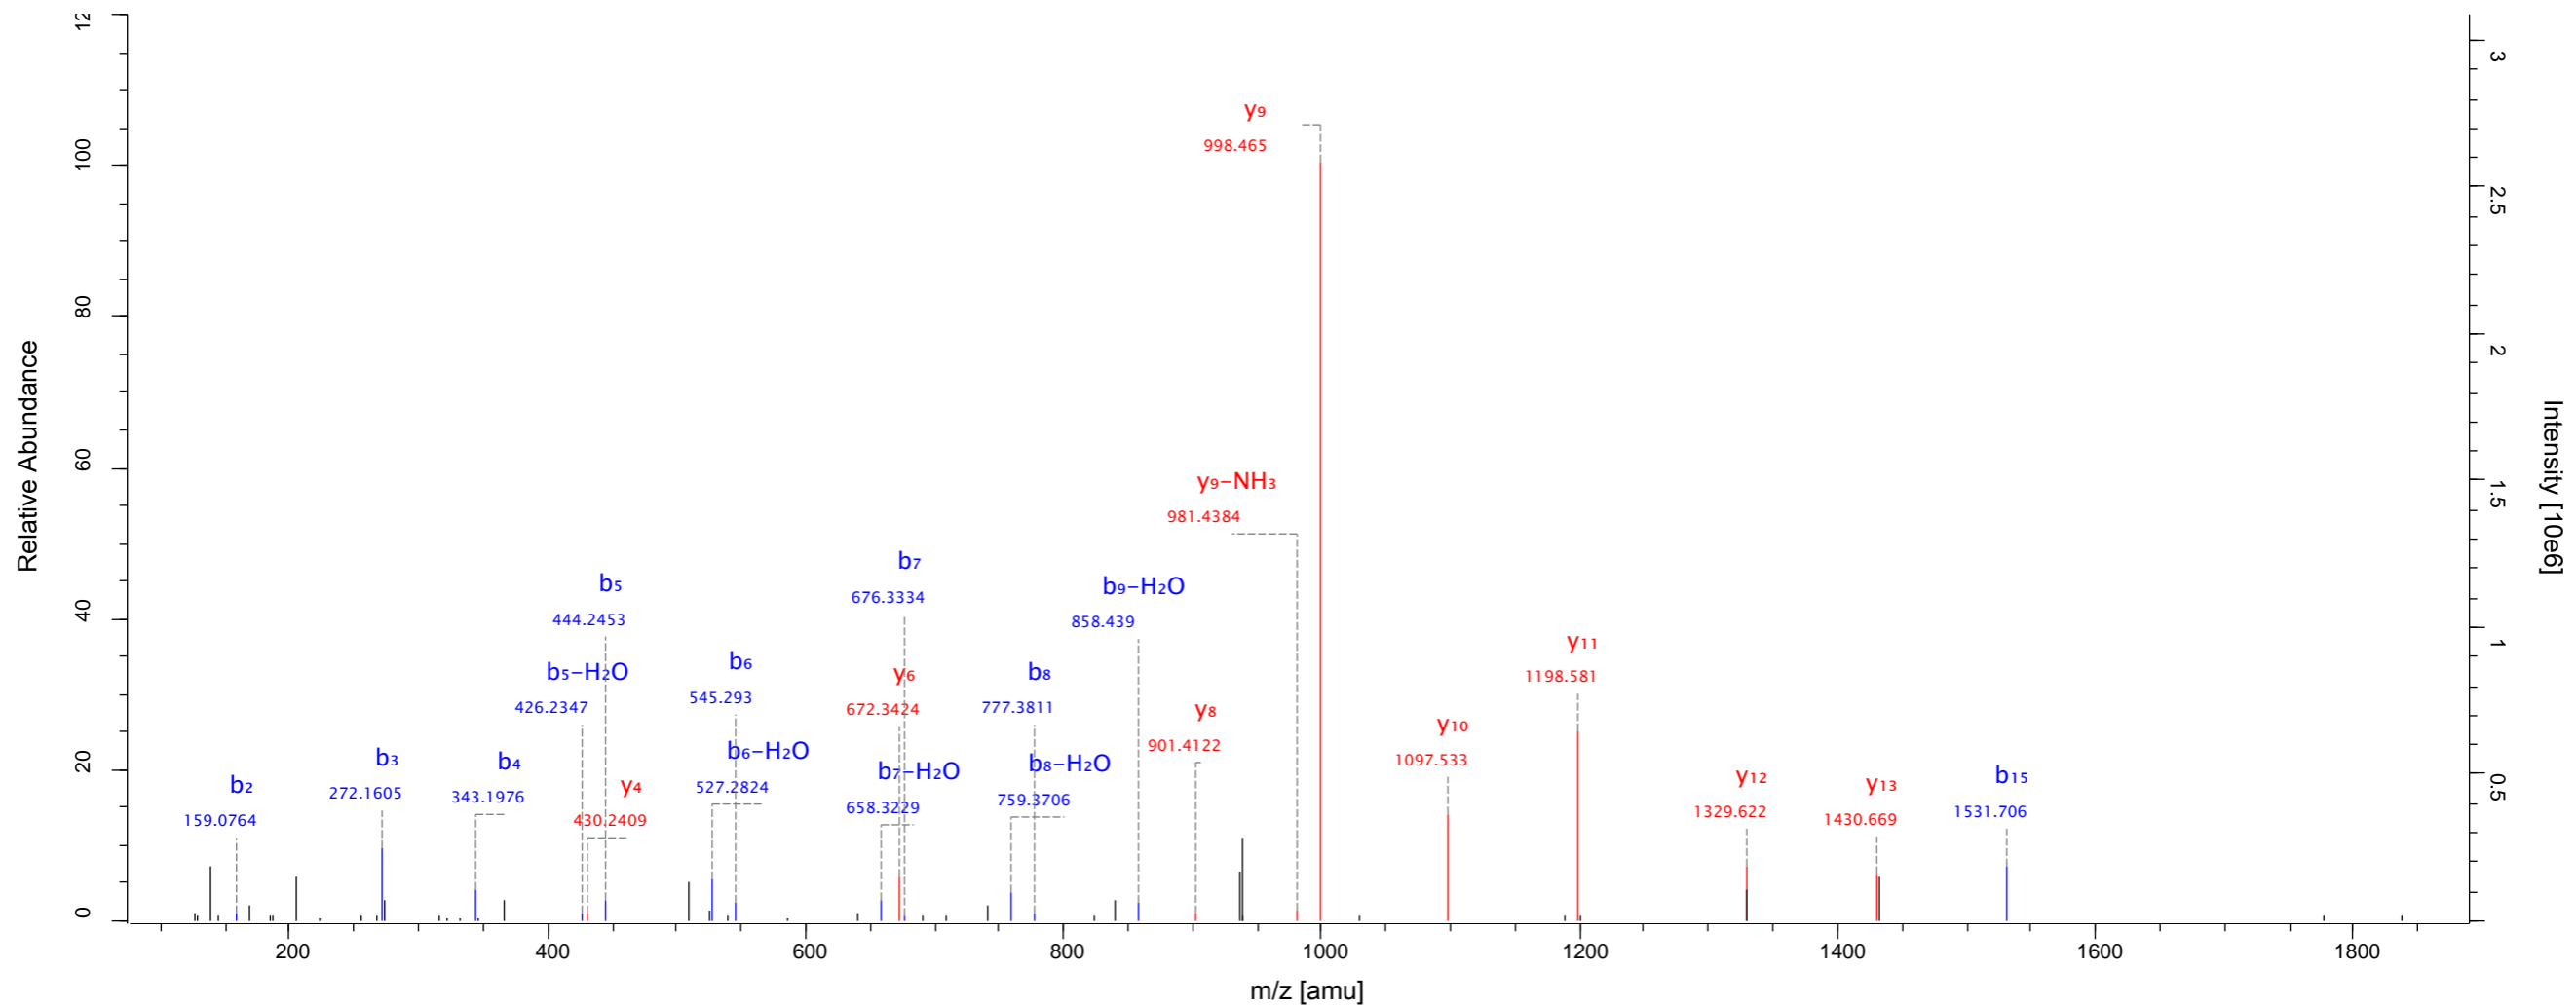

Raw file: 20111212\_EXQ5\_AnMi\_QC\_HCMVp1\_30  
 Scan number: 49429  
 Protein: ORFL71C - NC\_006273.2[29278,30408]- <unknown description>; ORFL71C.iORF1 - NC\_006273.2[29278,30354]- <unknown description>  
 Peptide score: 234.23  
 Method: FTMS; HCD

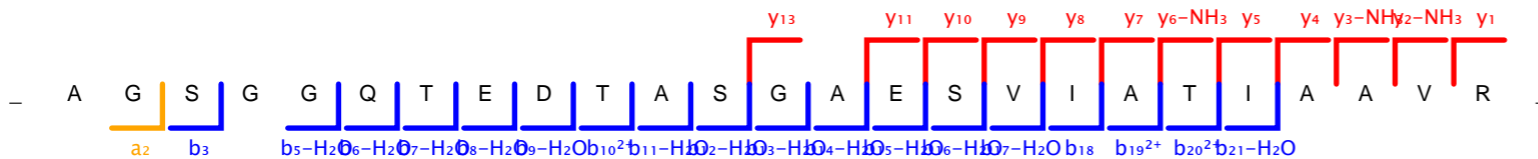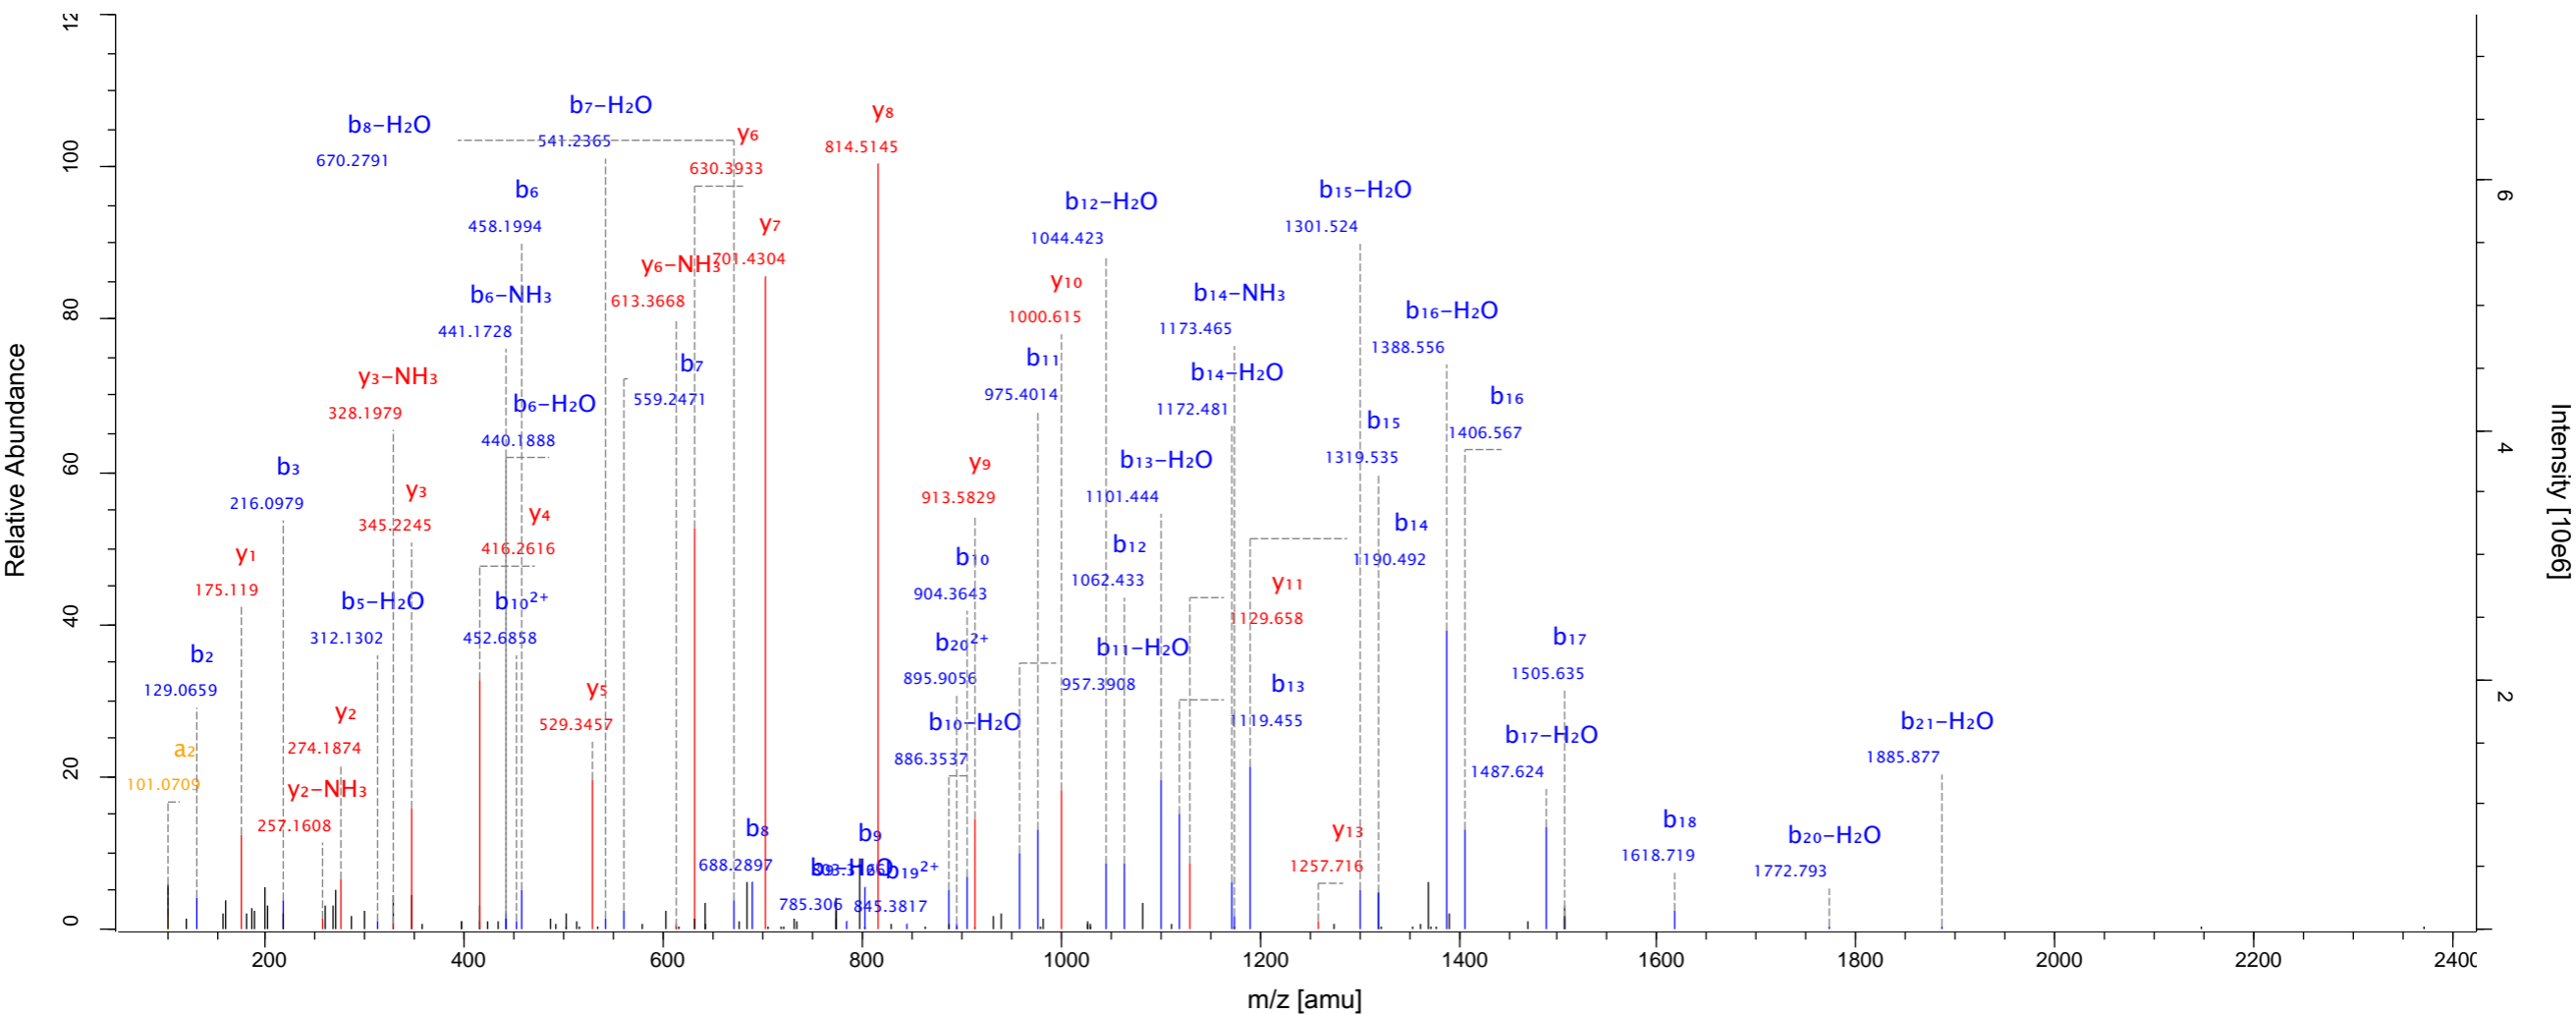

Raw file: 20111212\_EXQ5\_AnMi\_QC\_HCMVp11\_30  
Scan number: 6732  
Protein: ORFL147C - NC\_006273.2[85932,87362]- <unknown description>  
Peptide score: 80.69  
Method: FTMS; HCD

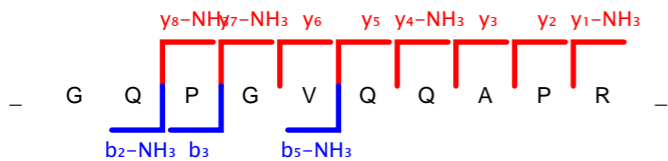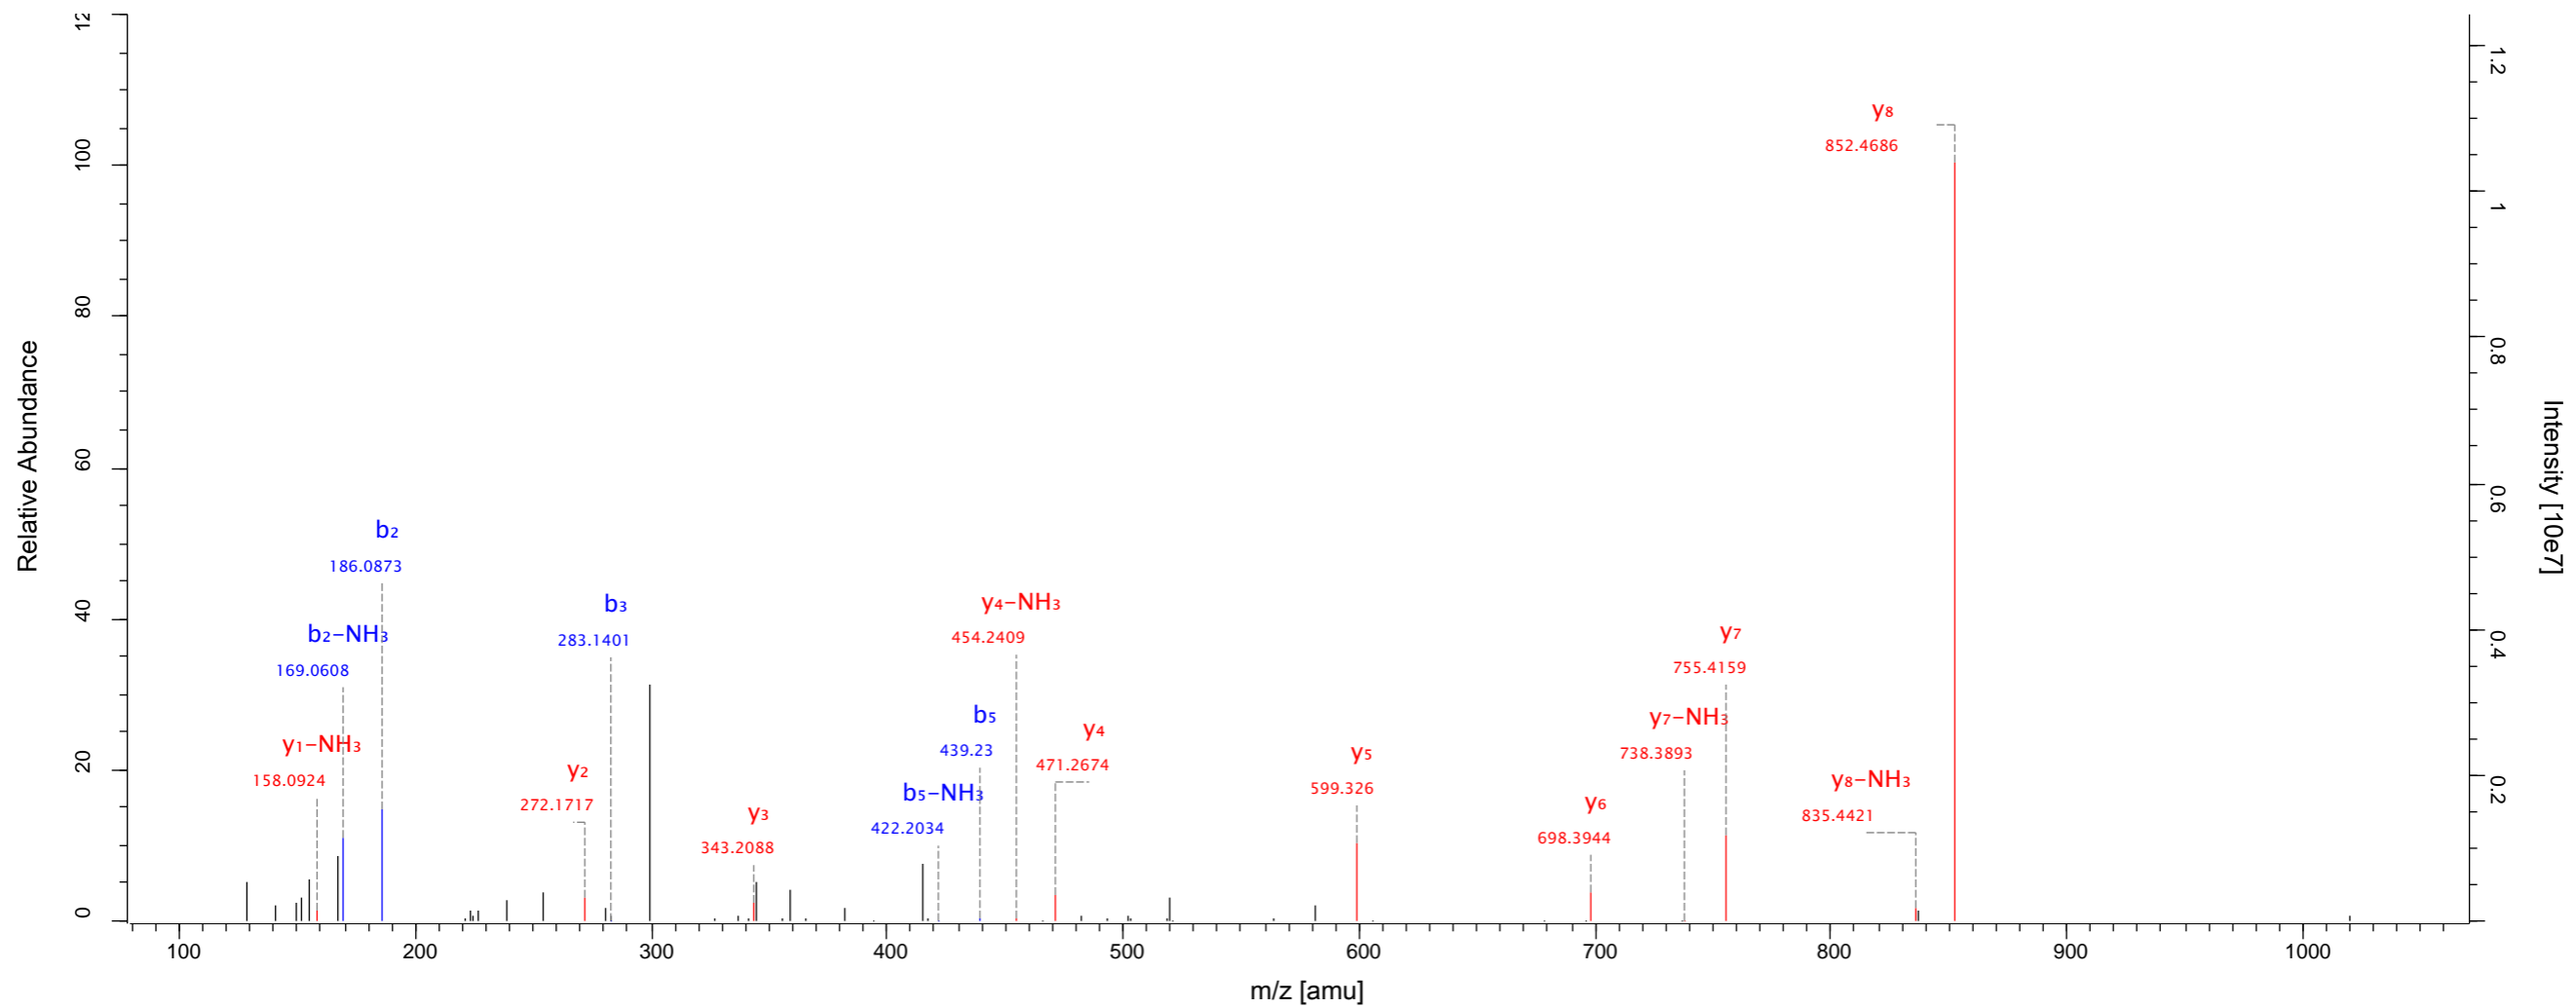



Raw file: 20111212\_EXQ5\_AnMi\_QC\_HCMVp11\_30  
Scan number: 7069  
Protein: ORFL253W.iORF1 + NC\_006273.2[161917,163748]+ <unknown description>; ORFL251W + NC\_006273.2[161872,163748]+ <unknown description>  
Peptide score: 78.65  
Method: FTMS; HCD

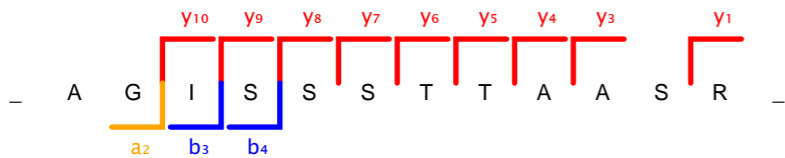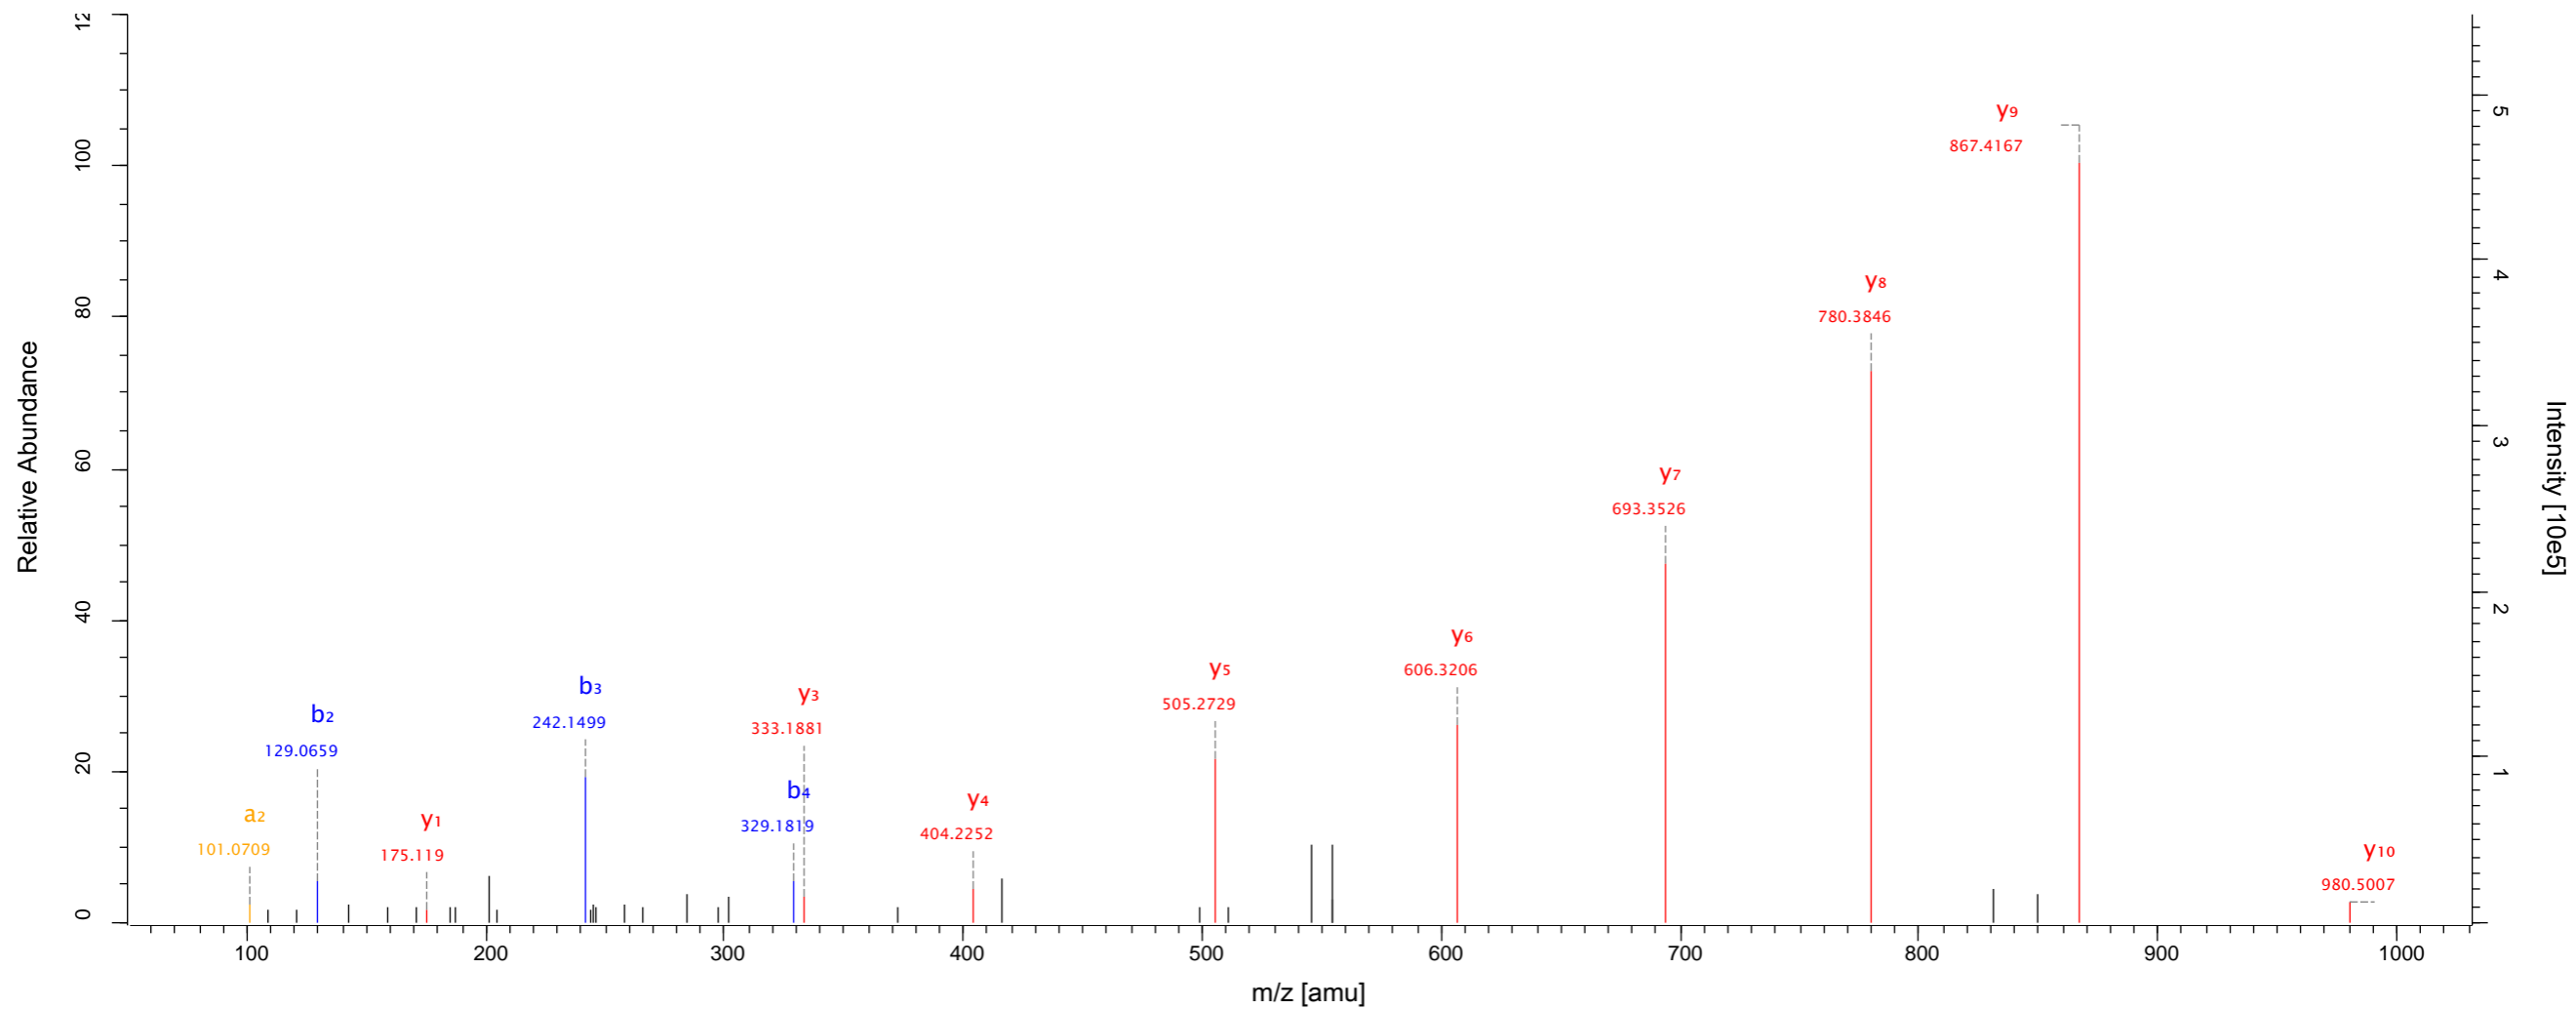

Raw file: 20111212\_EXQ5\_AnMi\_QC\_HCMVp11\_30

Scan number: 9263

Protein: ORFL321W + NC\_006273.2[191968,194126]+ <unknown description>; ORFL321W.iORF1 + NC\_006273.2[191968,194126]+ <unknown description>; ORFL321W.iORF4 + NC\_006273.2[193200,194126]+ <unknown description>

Peptide score: 124.86

Method: FTMS; HCD

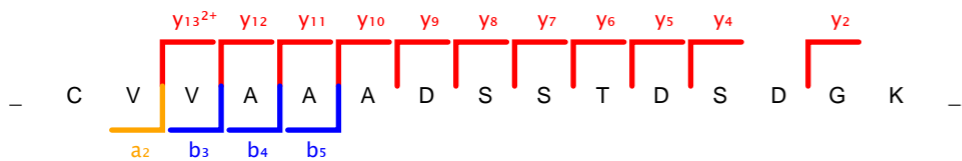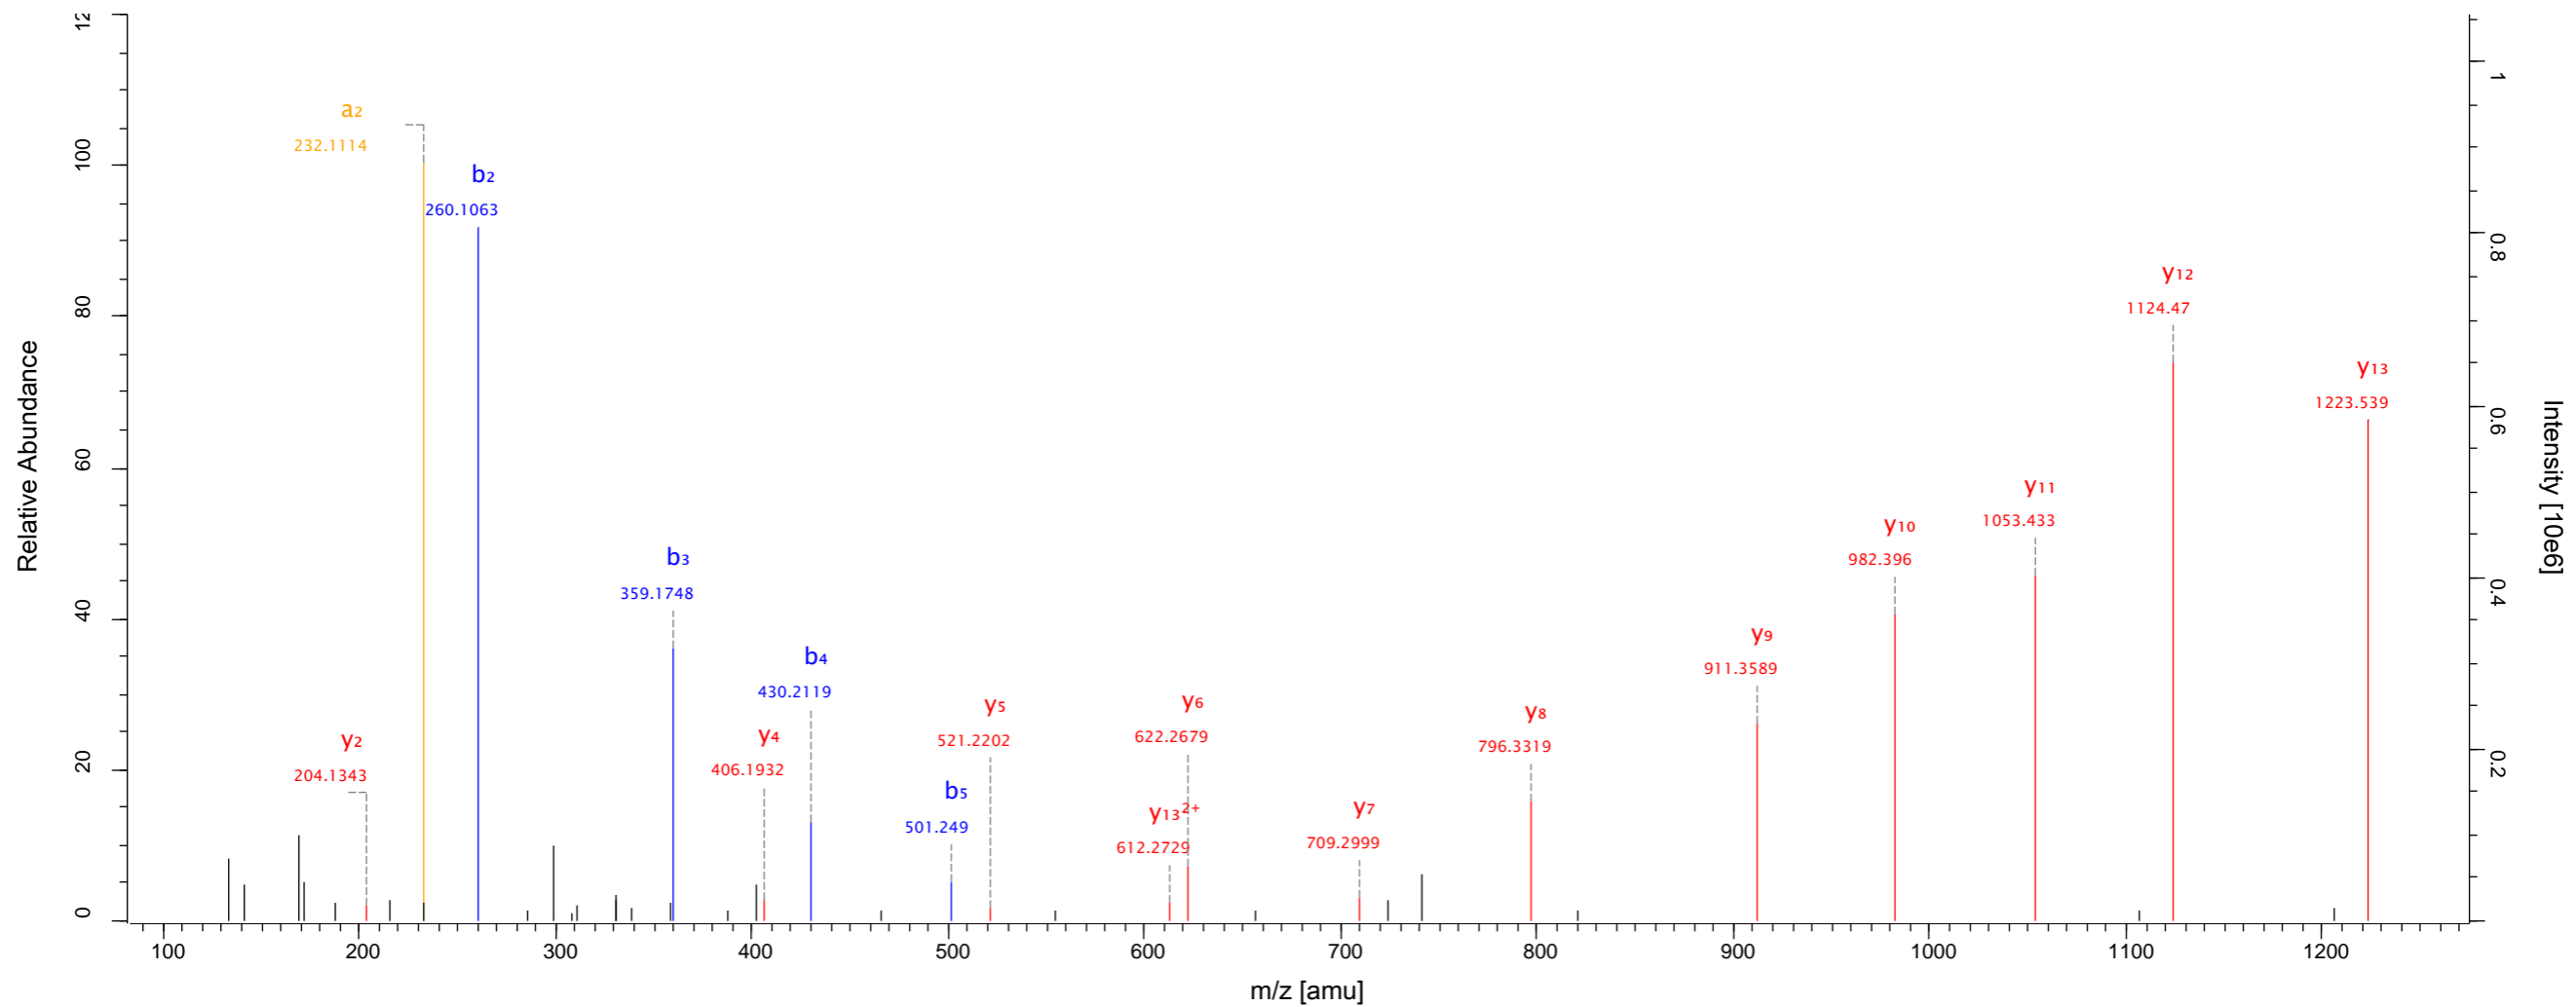

Raw file: 20111212\_EXQ5\_AnMi\_QC\_HCMVp1\_31  
Scan number: 18351  
Protein: ORFL147C - NC\_006273.2[85932,87362]- <unknown description>  
Peptide score: 114.02  
Method: FTMS; HCD

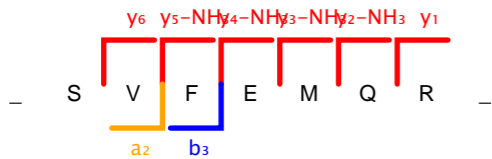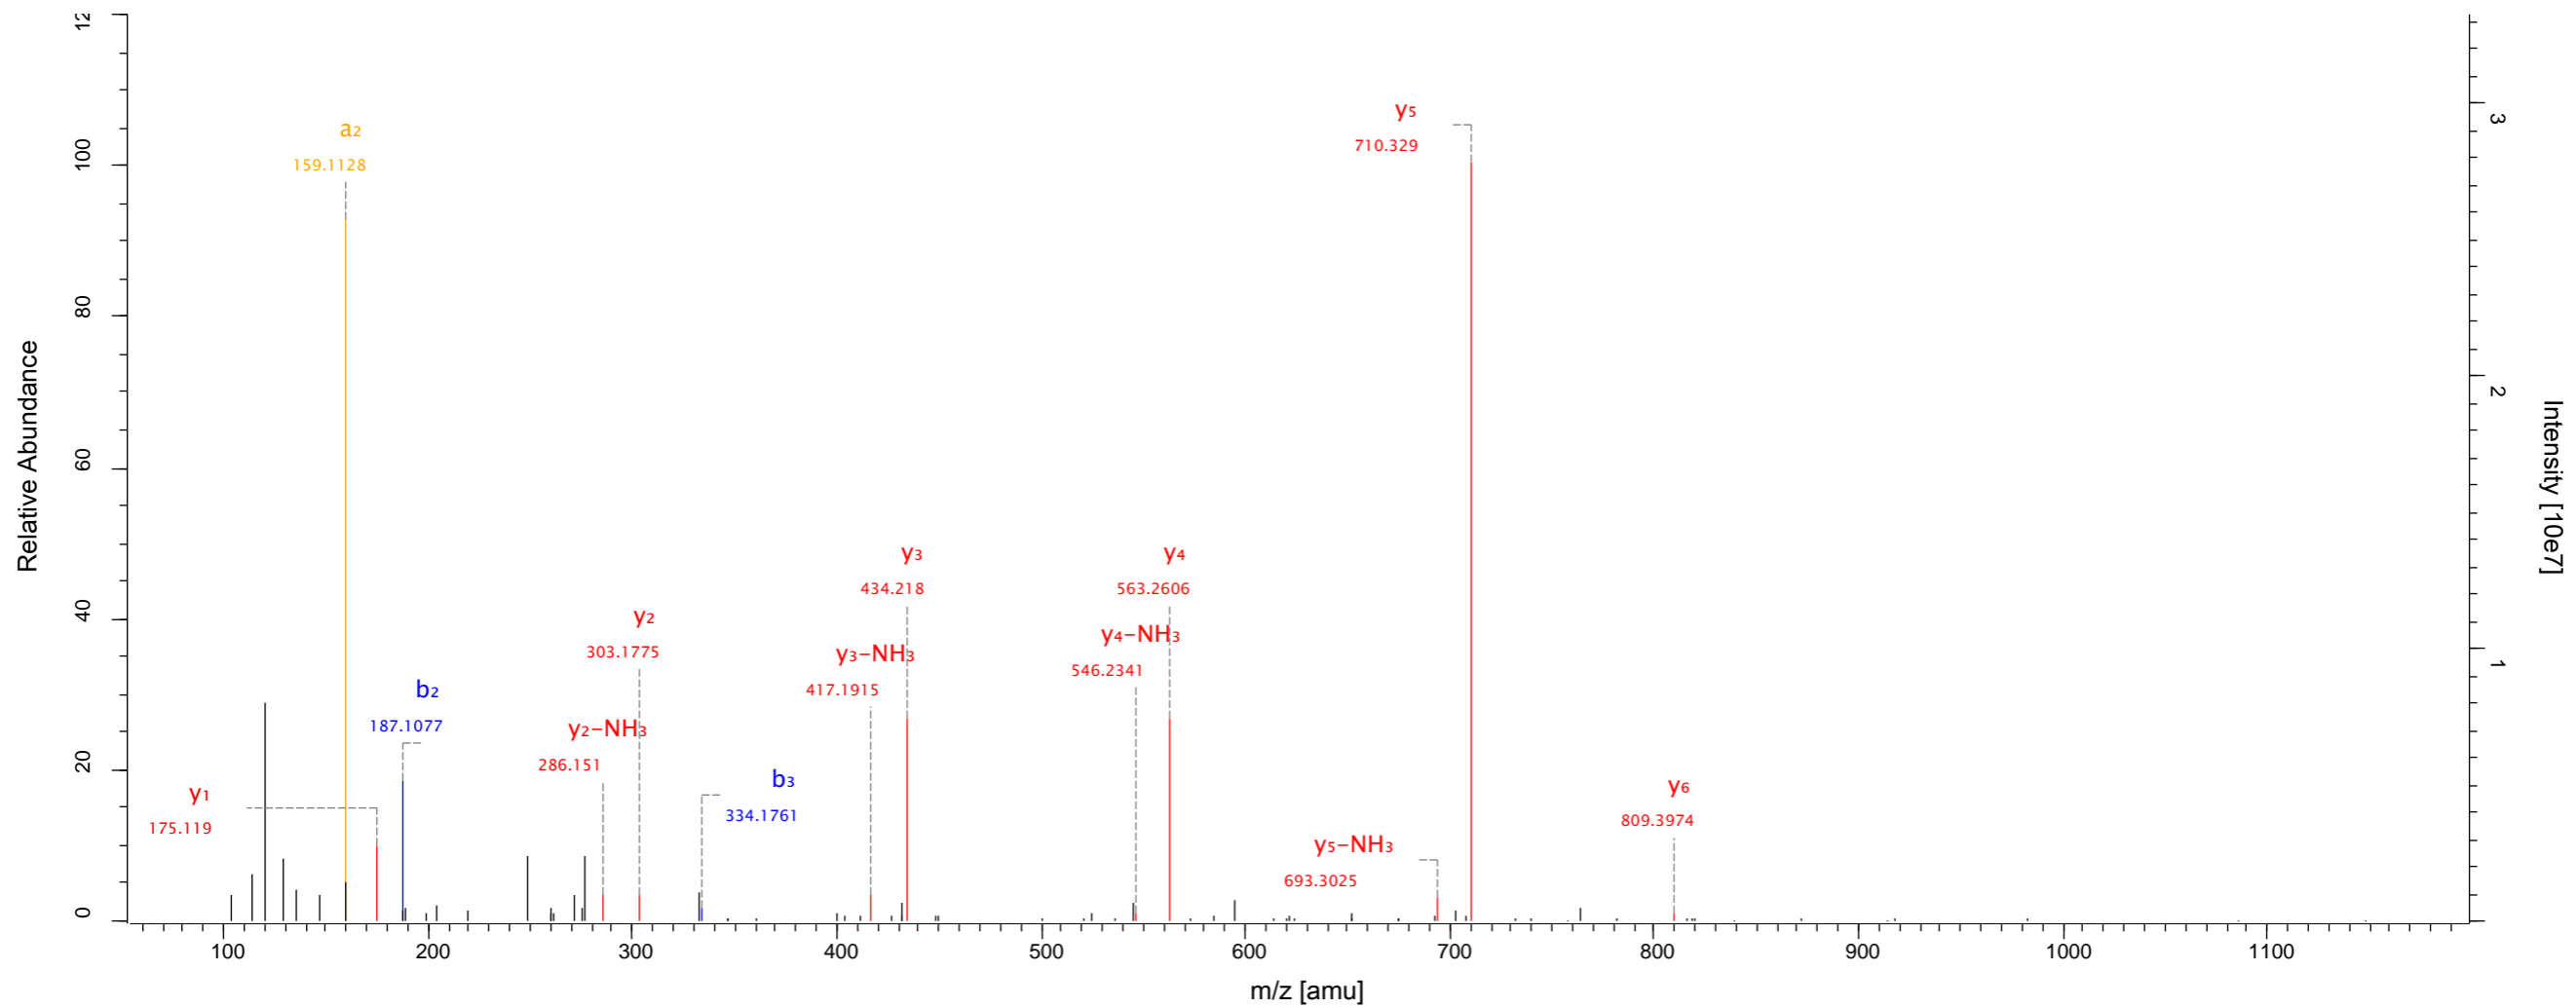

Raw file: 20111212\_EXQ5\_AnMi\_QC\_HCMVp1\_31  
 Scan number: 4750  
 Protein: ORFL147C - NC\_006273.2[85932,87362]- <unknown description>  
 Peptide score: 112.36  
 Method: FTMS; HCD

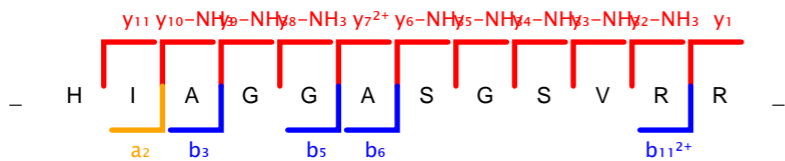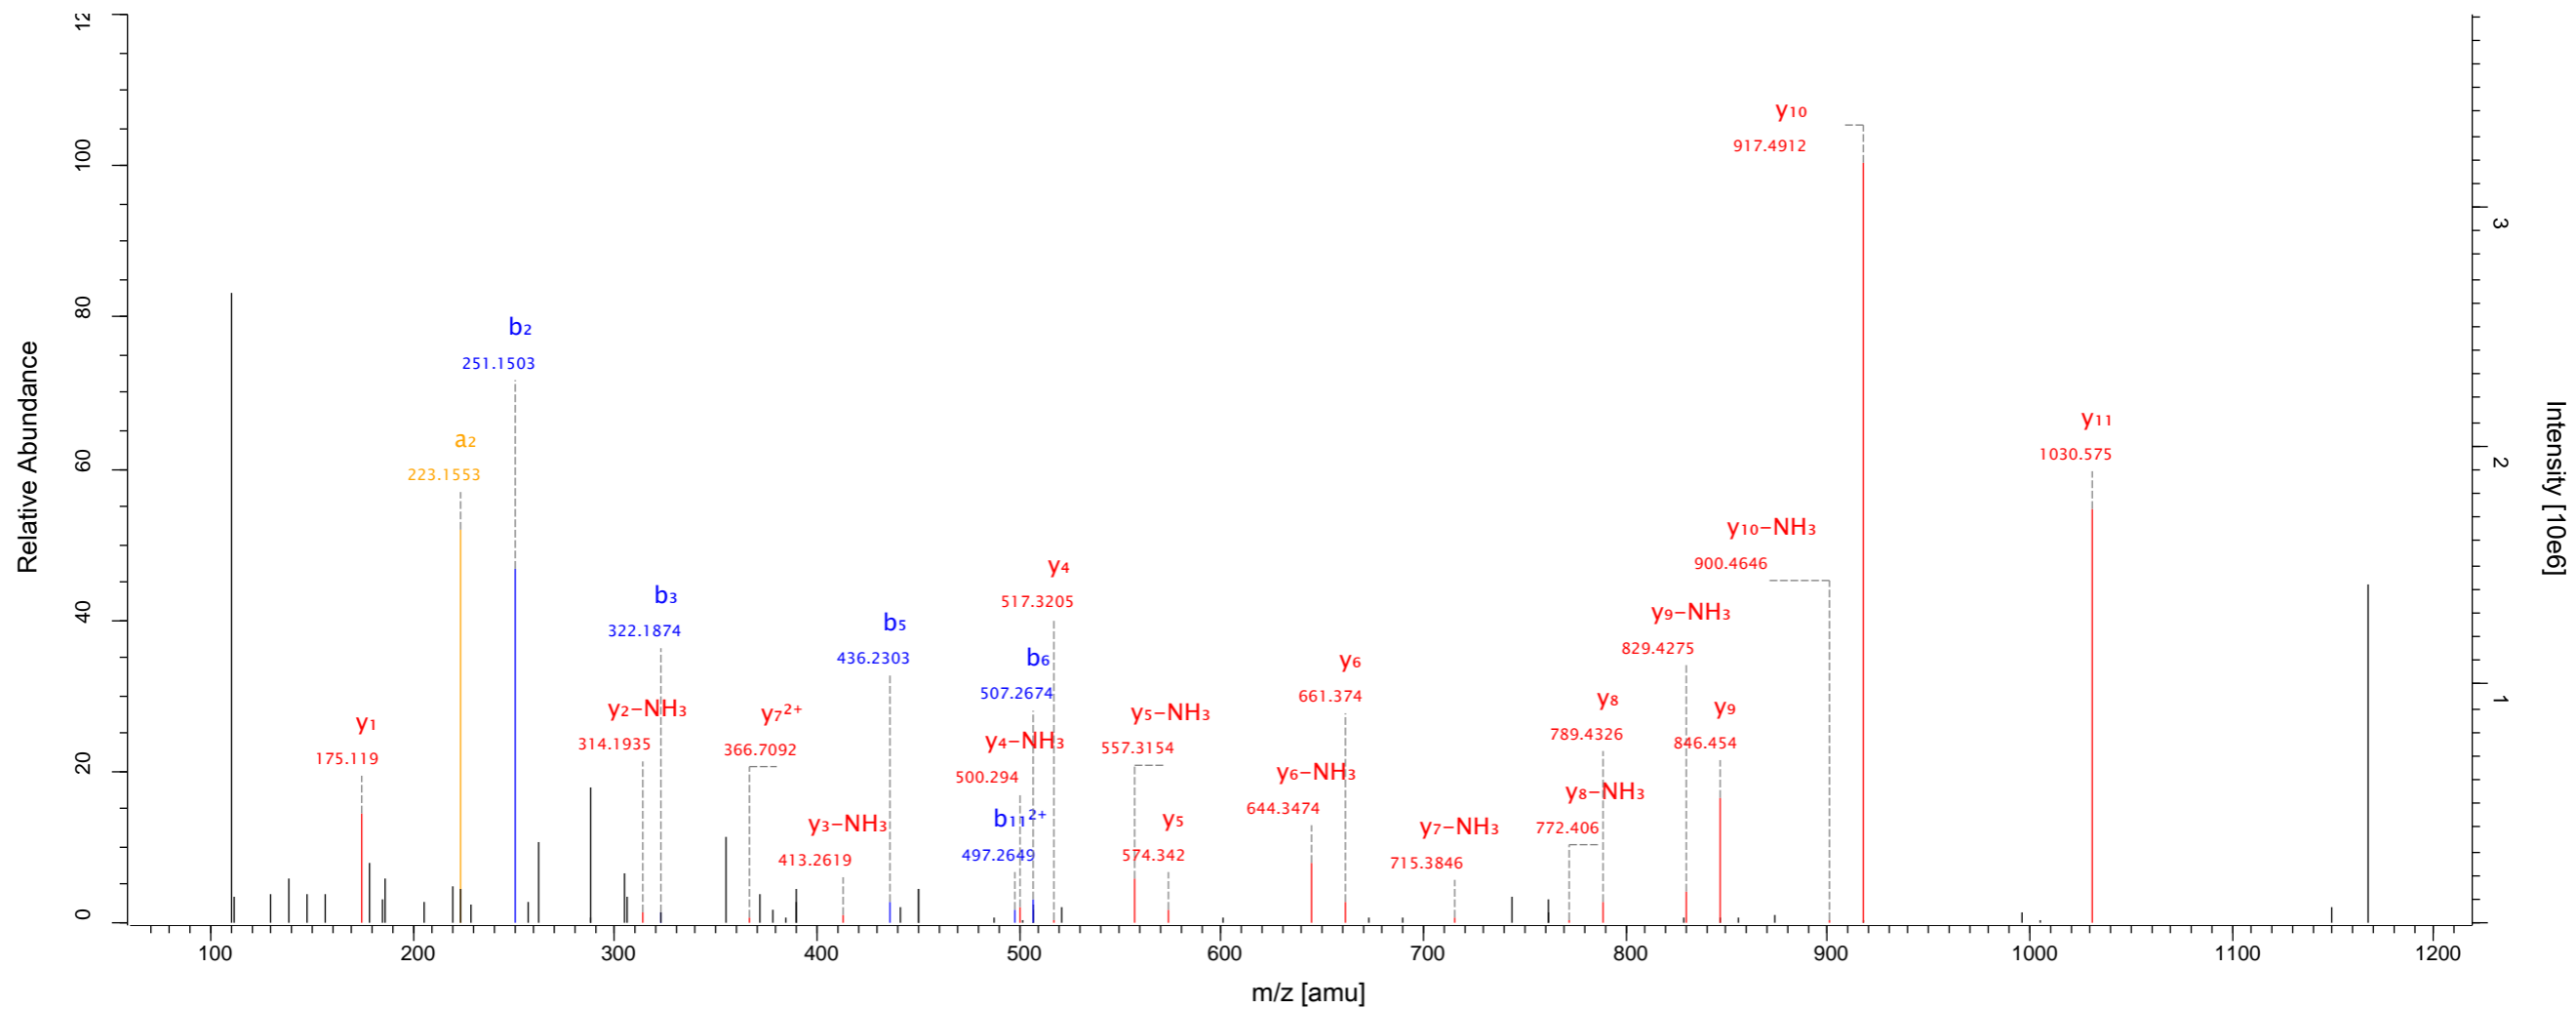

Raw file: 20111212\_EXQ5\_AnMi\_QC\_HCMVp1\_31  
Scan number: 4775  
Protein: ORFL147C - NC\_006273.2[85932,87362]- <unknown description>  
Peptide score: 59.43  
Method: FTMS; HCD

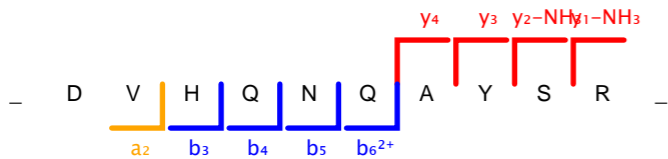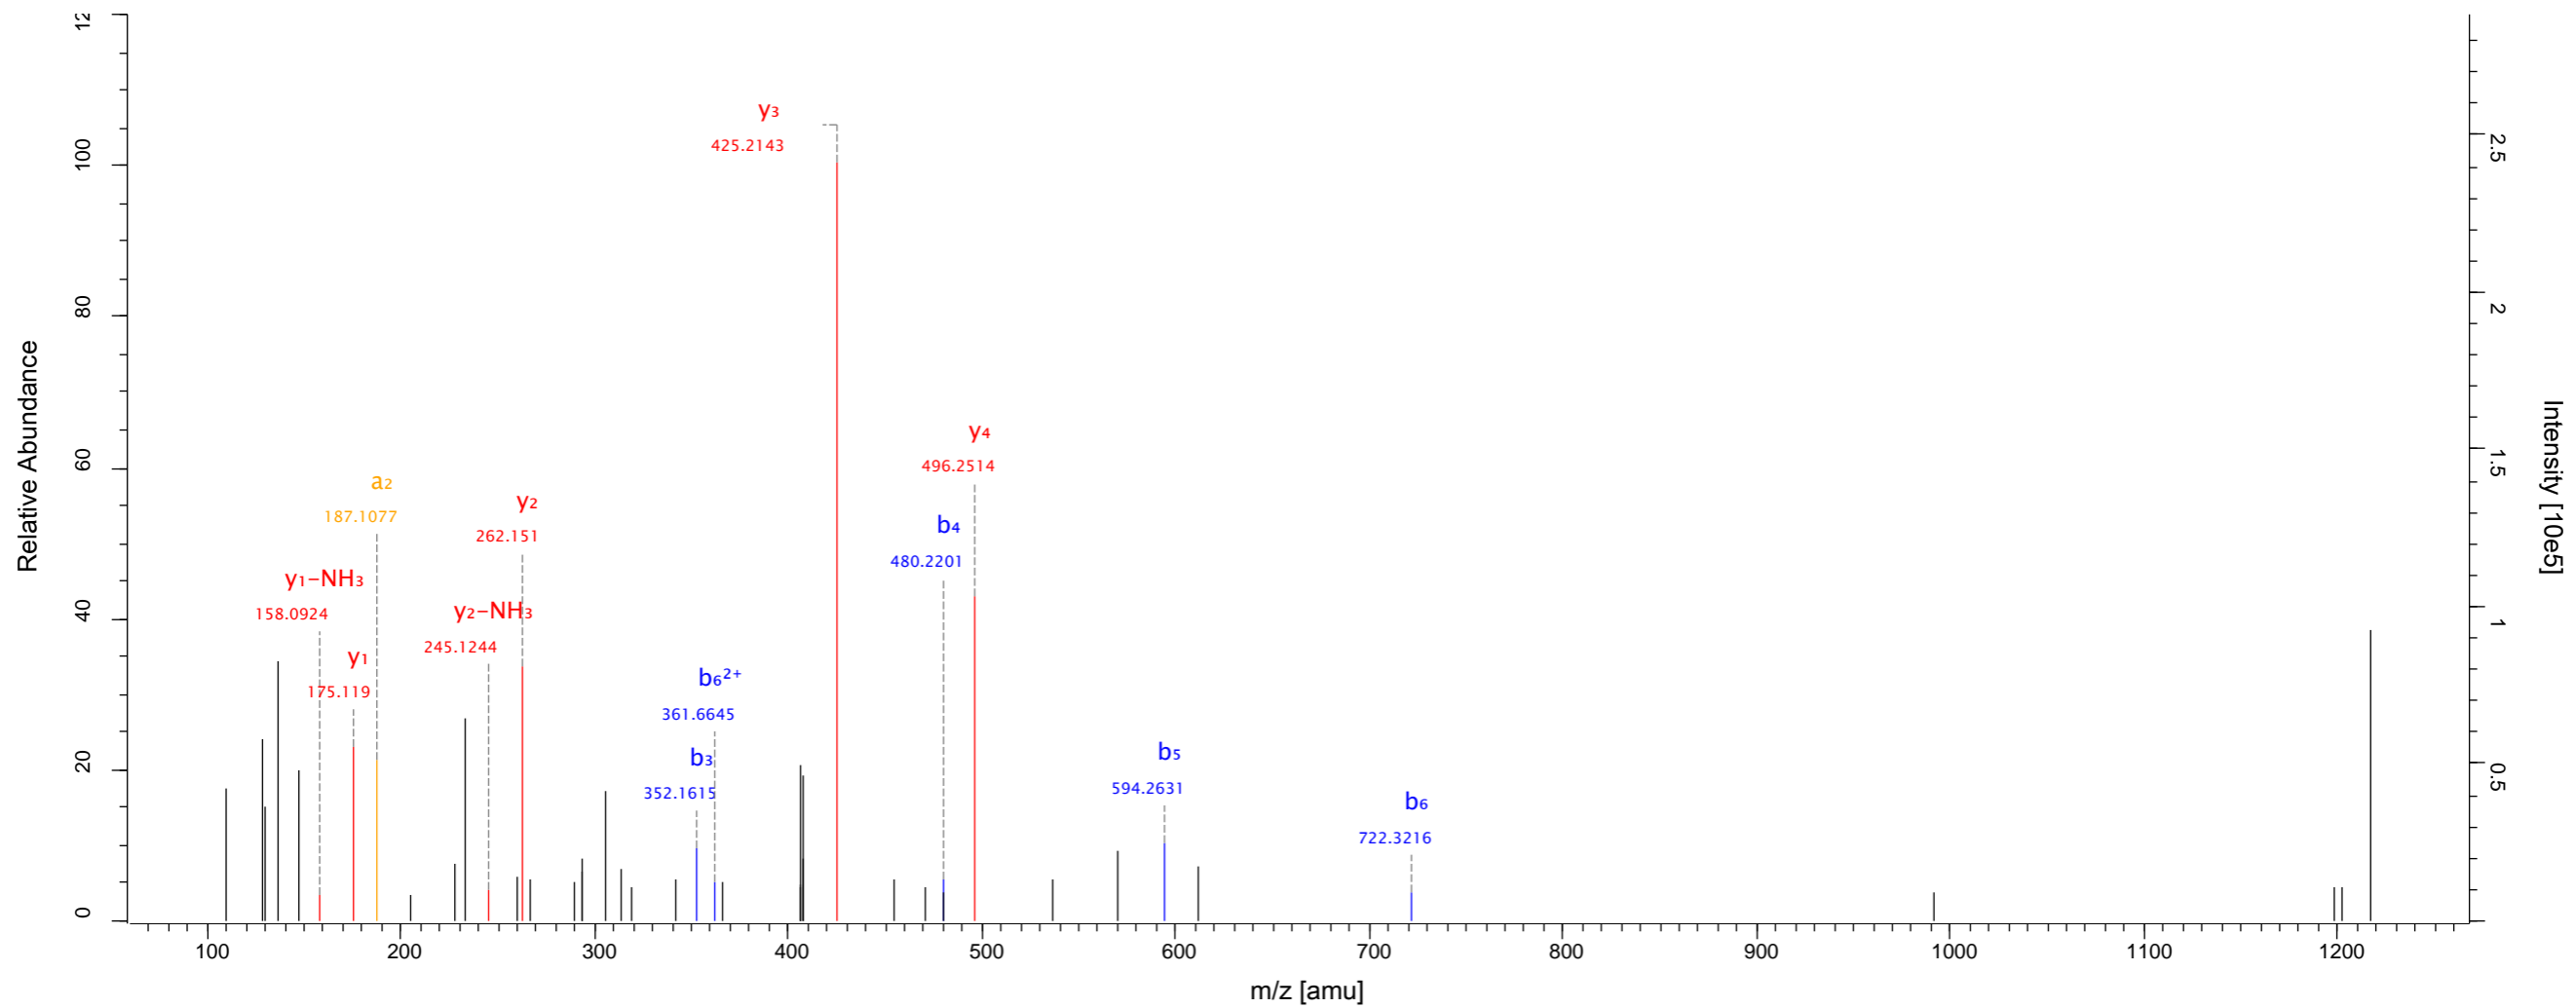

Raw file: 20111212\_EXQ5\_AnMi\_QC\_HCMVp1\_31  
 Scan number: 5127  
 Protein: ORFL147C - NC\_006273.2[85932,87362]- <unknown description>  
 Peptide score: 123.35  
 Method: FTMS; HCD

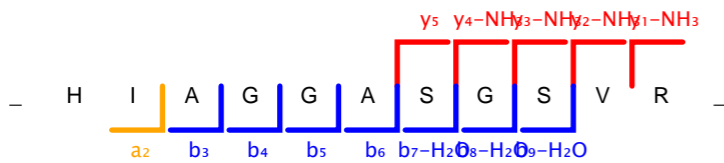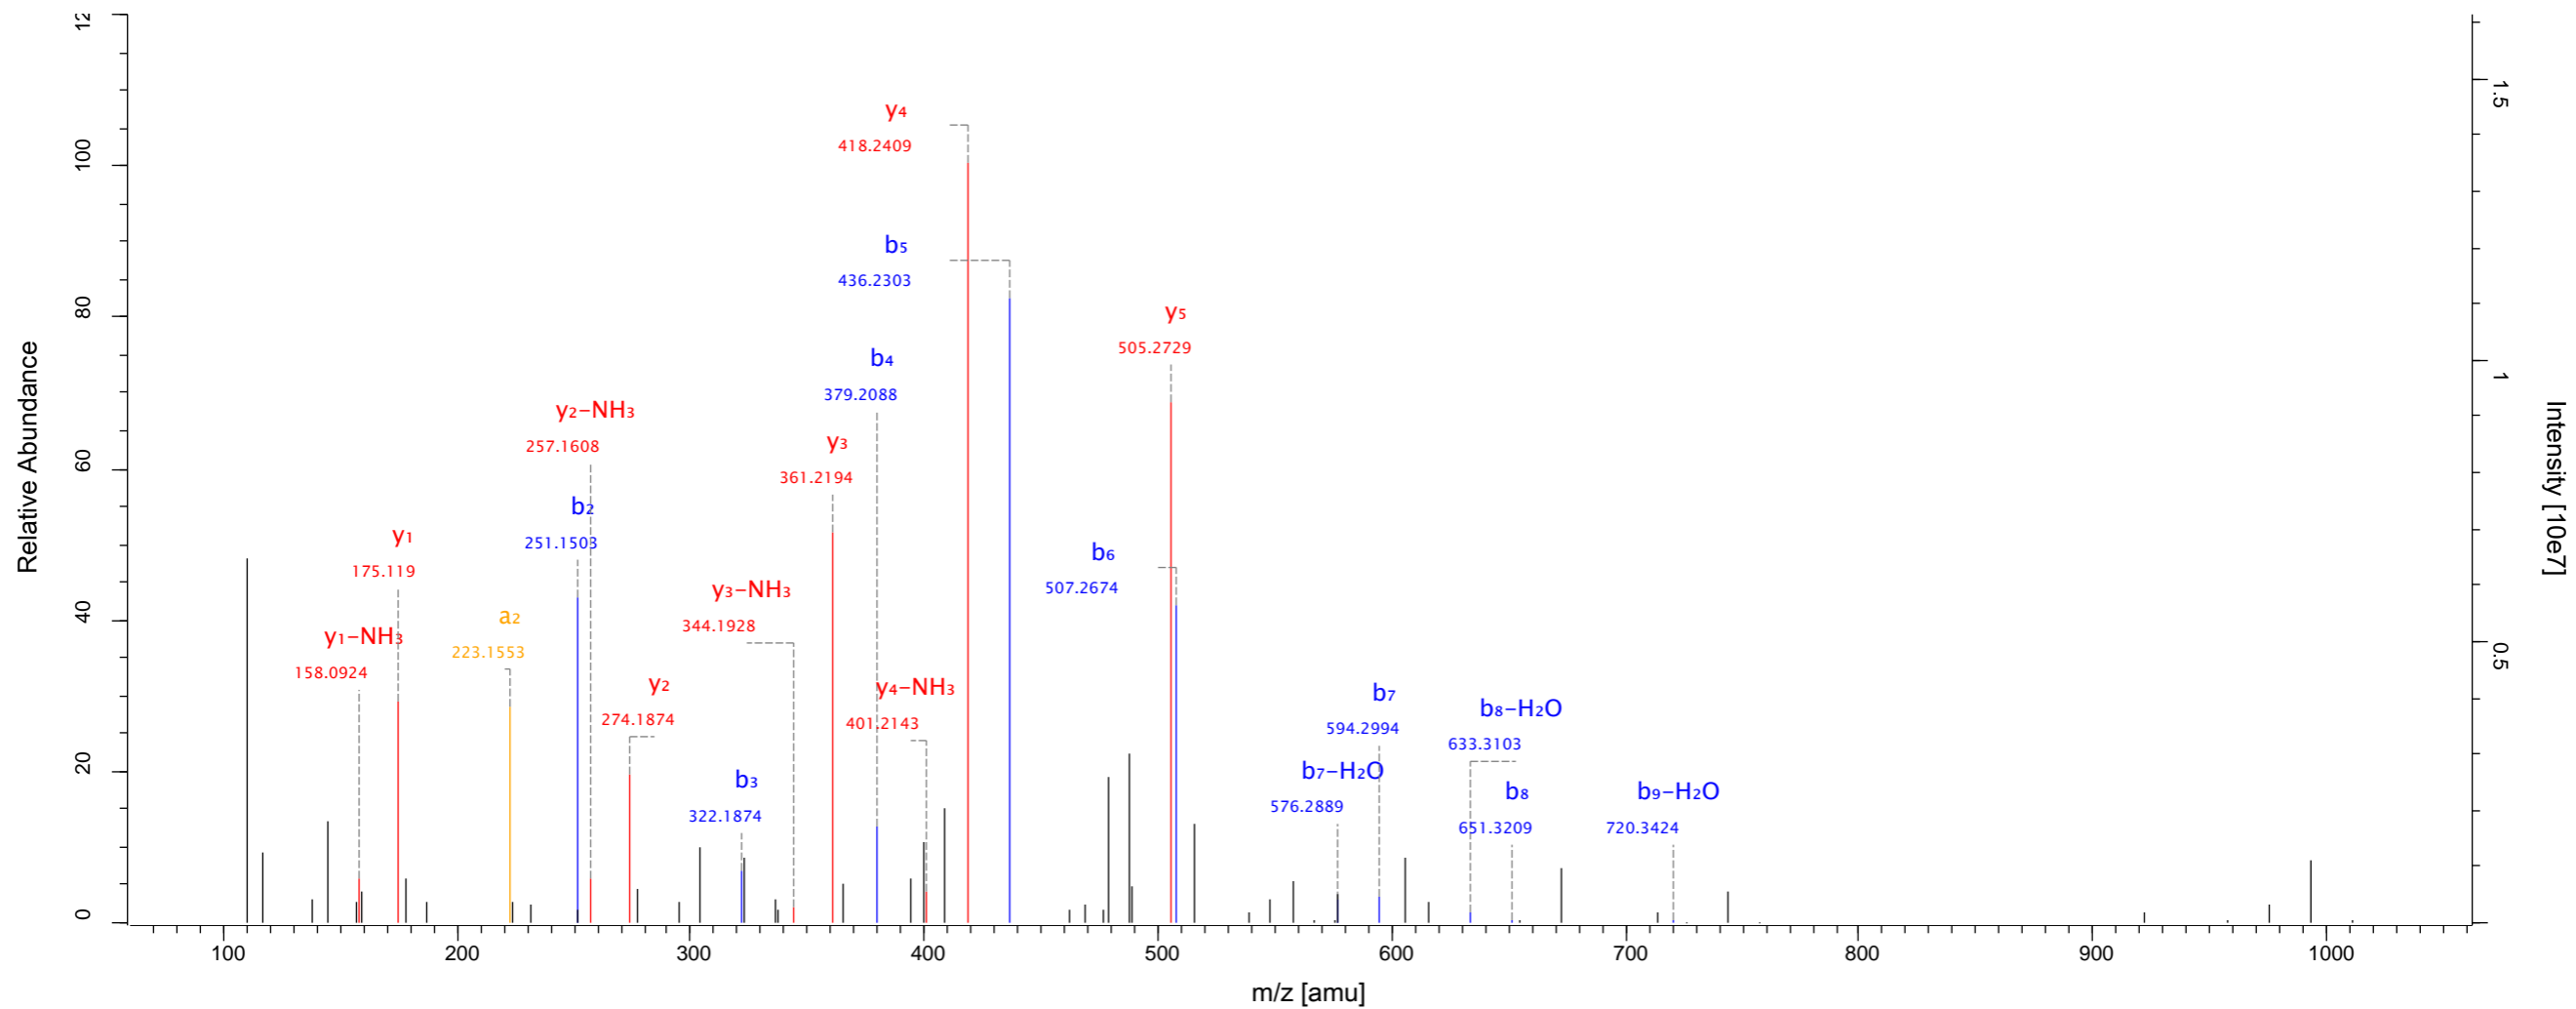

Raw file: 20111212\_EXQ5\_AnMi\_QC\_HCMVp1\_31  
 Scan number: 5302  
 Protein: ORFL147C - NC\_006273.2[85932,87362]- <unknown description>  
 Peptide score: 149.96  
 Method: FTMS; HCD

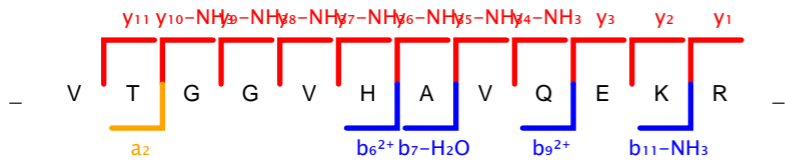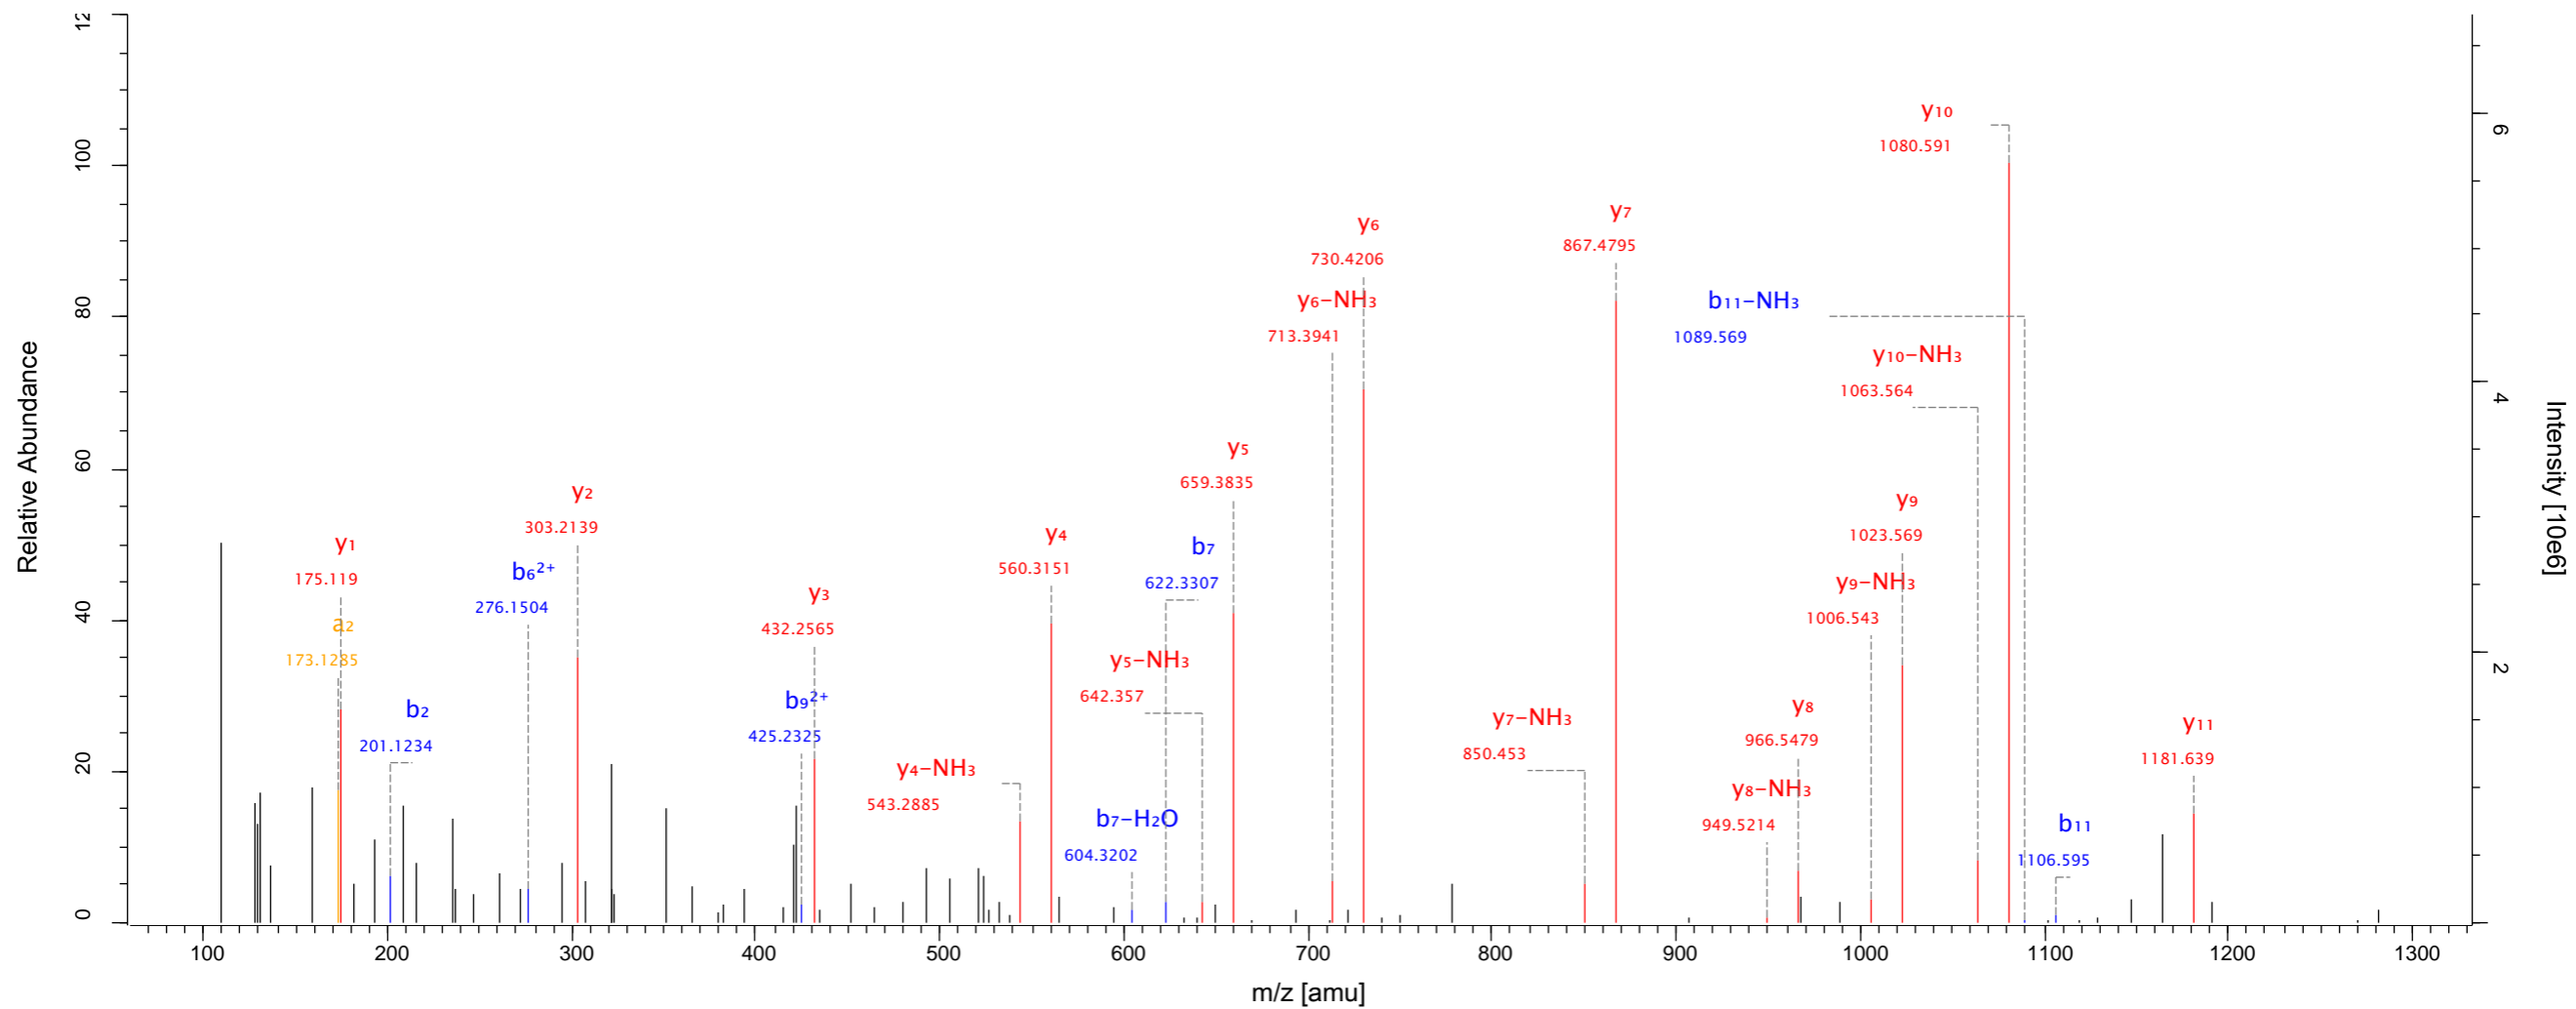

Raw file: 20111212\_EXQ5\_AnMi\_QC\_HCMVp1\_31  
Scan number: 5972  
Protein: ORFL147C - NC\_006273.2[85932,87362]- <unknown description>  
Peptide score: 180.19  
Method: FTMS; HCD

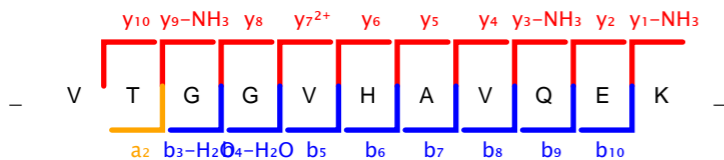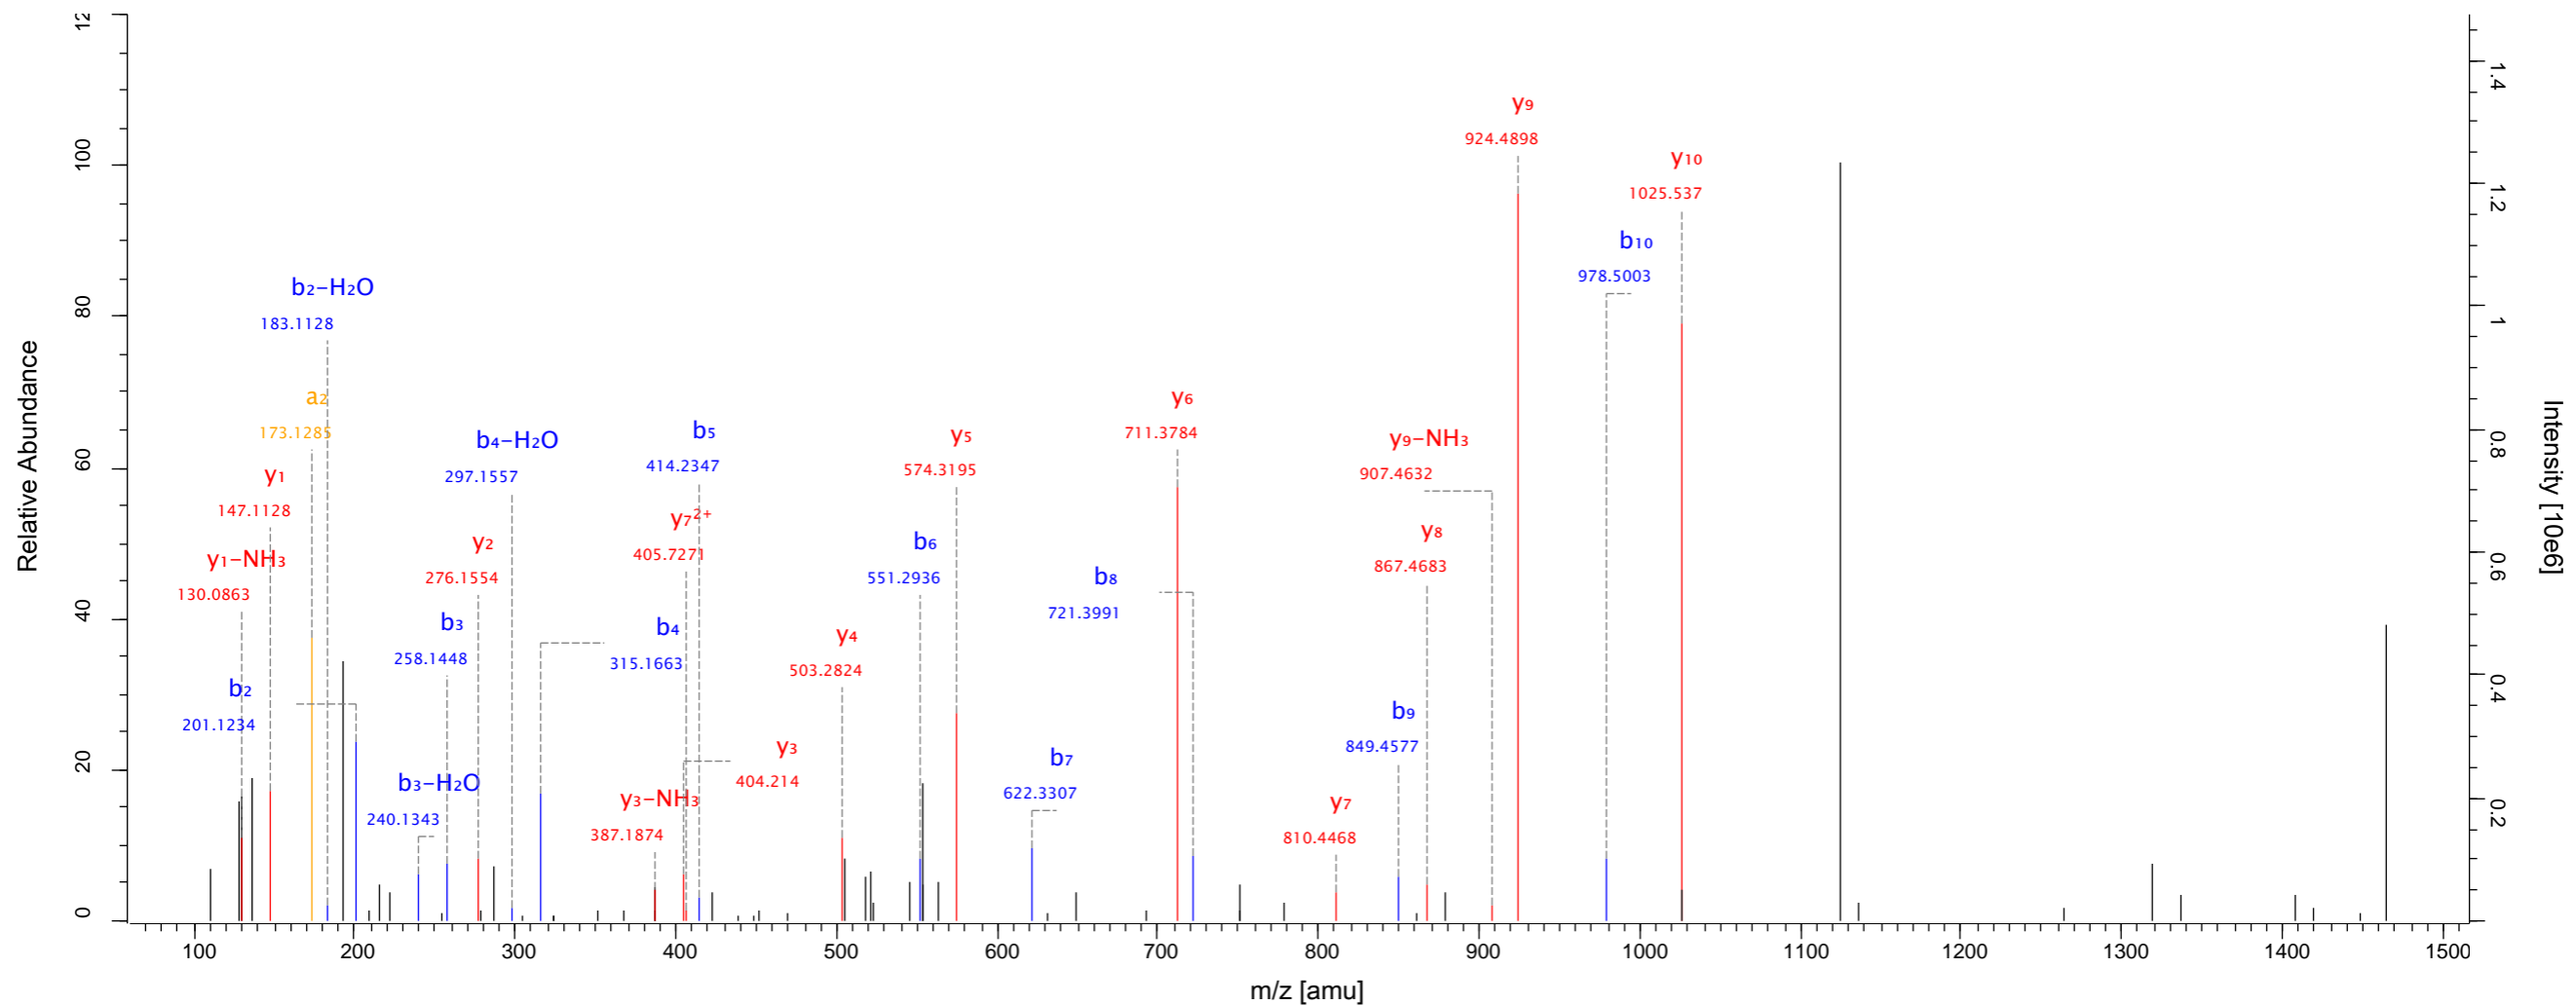



Raw file: 20111212\_EXQ5\_AnMi\_QC\_HCMVp11\_31  
 Scan number: 7324  
 Protein: ORFL147C - NC\_006273.2[85932,87362]- <unknown description>  
 Peptide score: 138.25  
 Method: FTMS; HCD

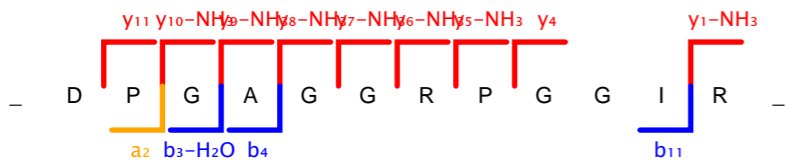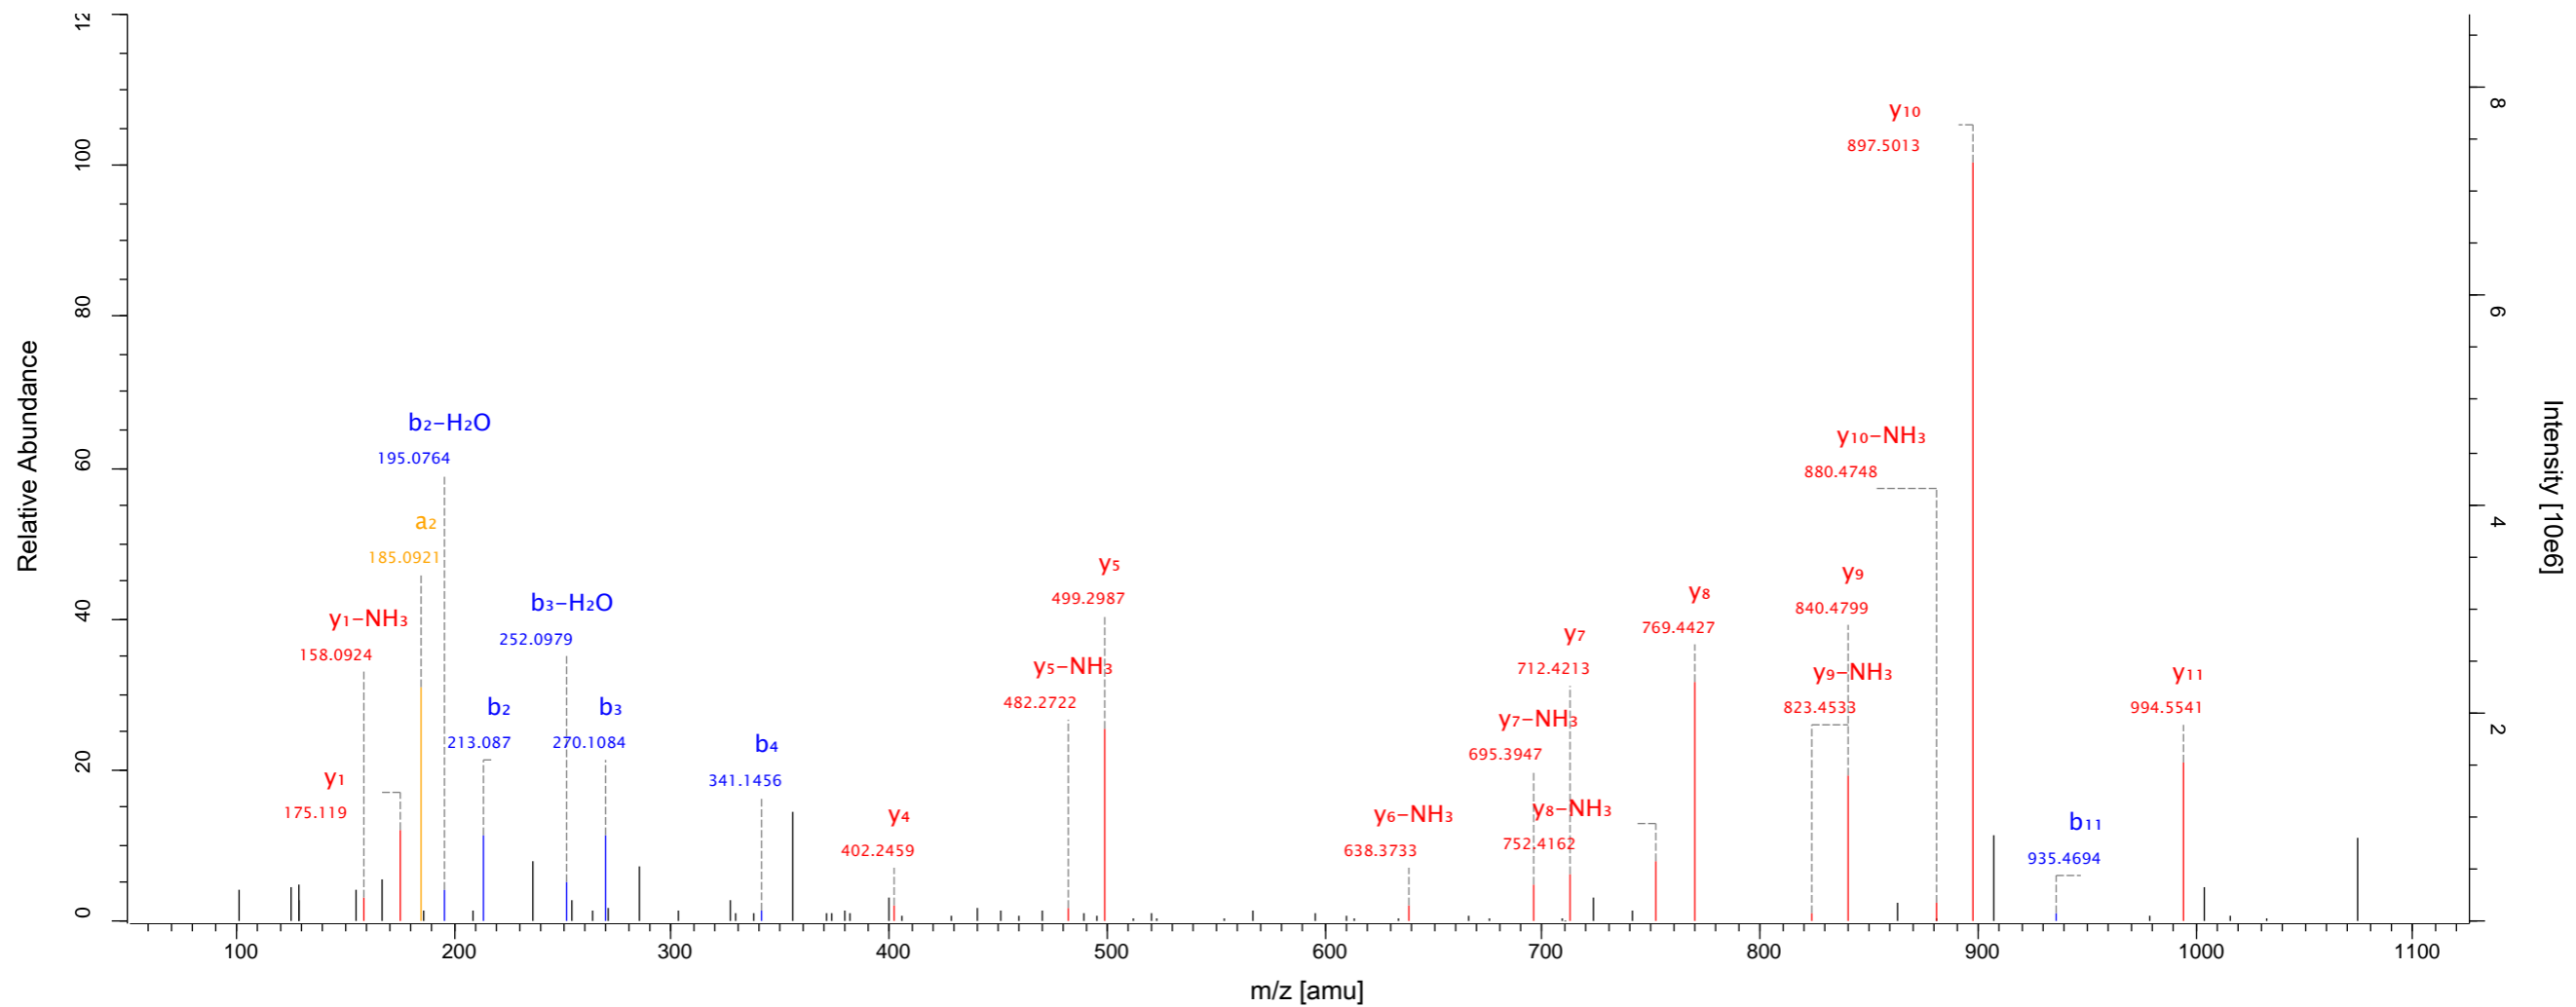

Raw file: 20111212\_EXQ5\_AnMi\_QC\_HCMVp1\_31  
Scan number: 7421  
Protein: ORFL147C - NC\_006273.2[85932,87362]- <unknown description>  
Peptide score: 107.35  
Method: FTMS; HCD

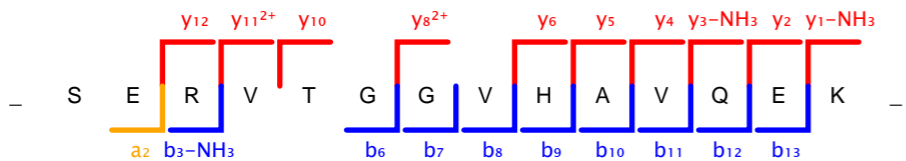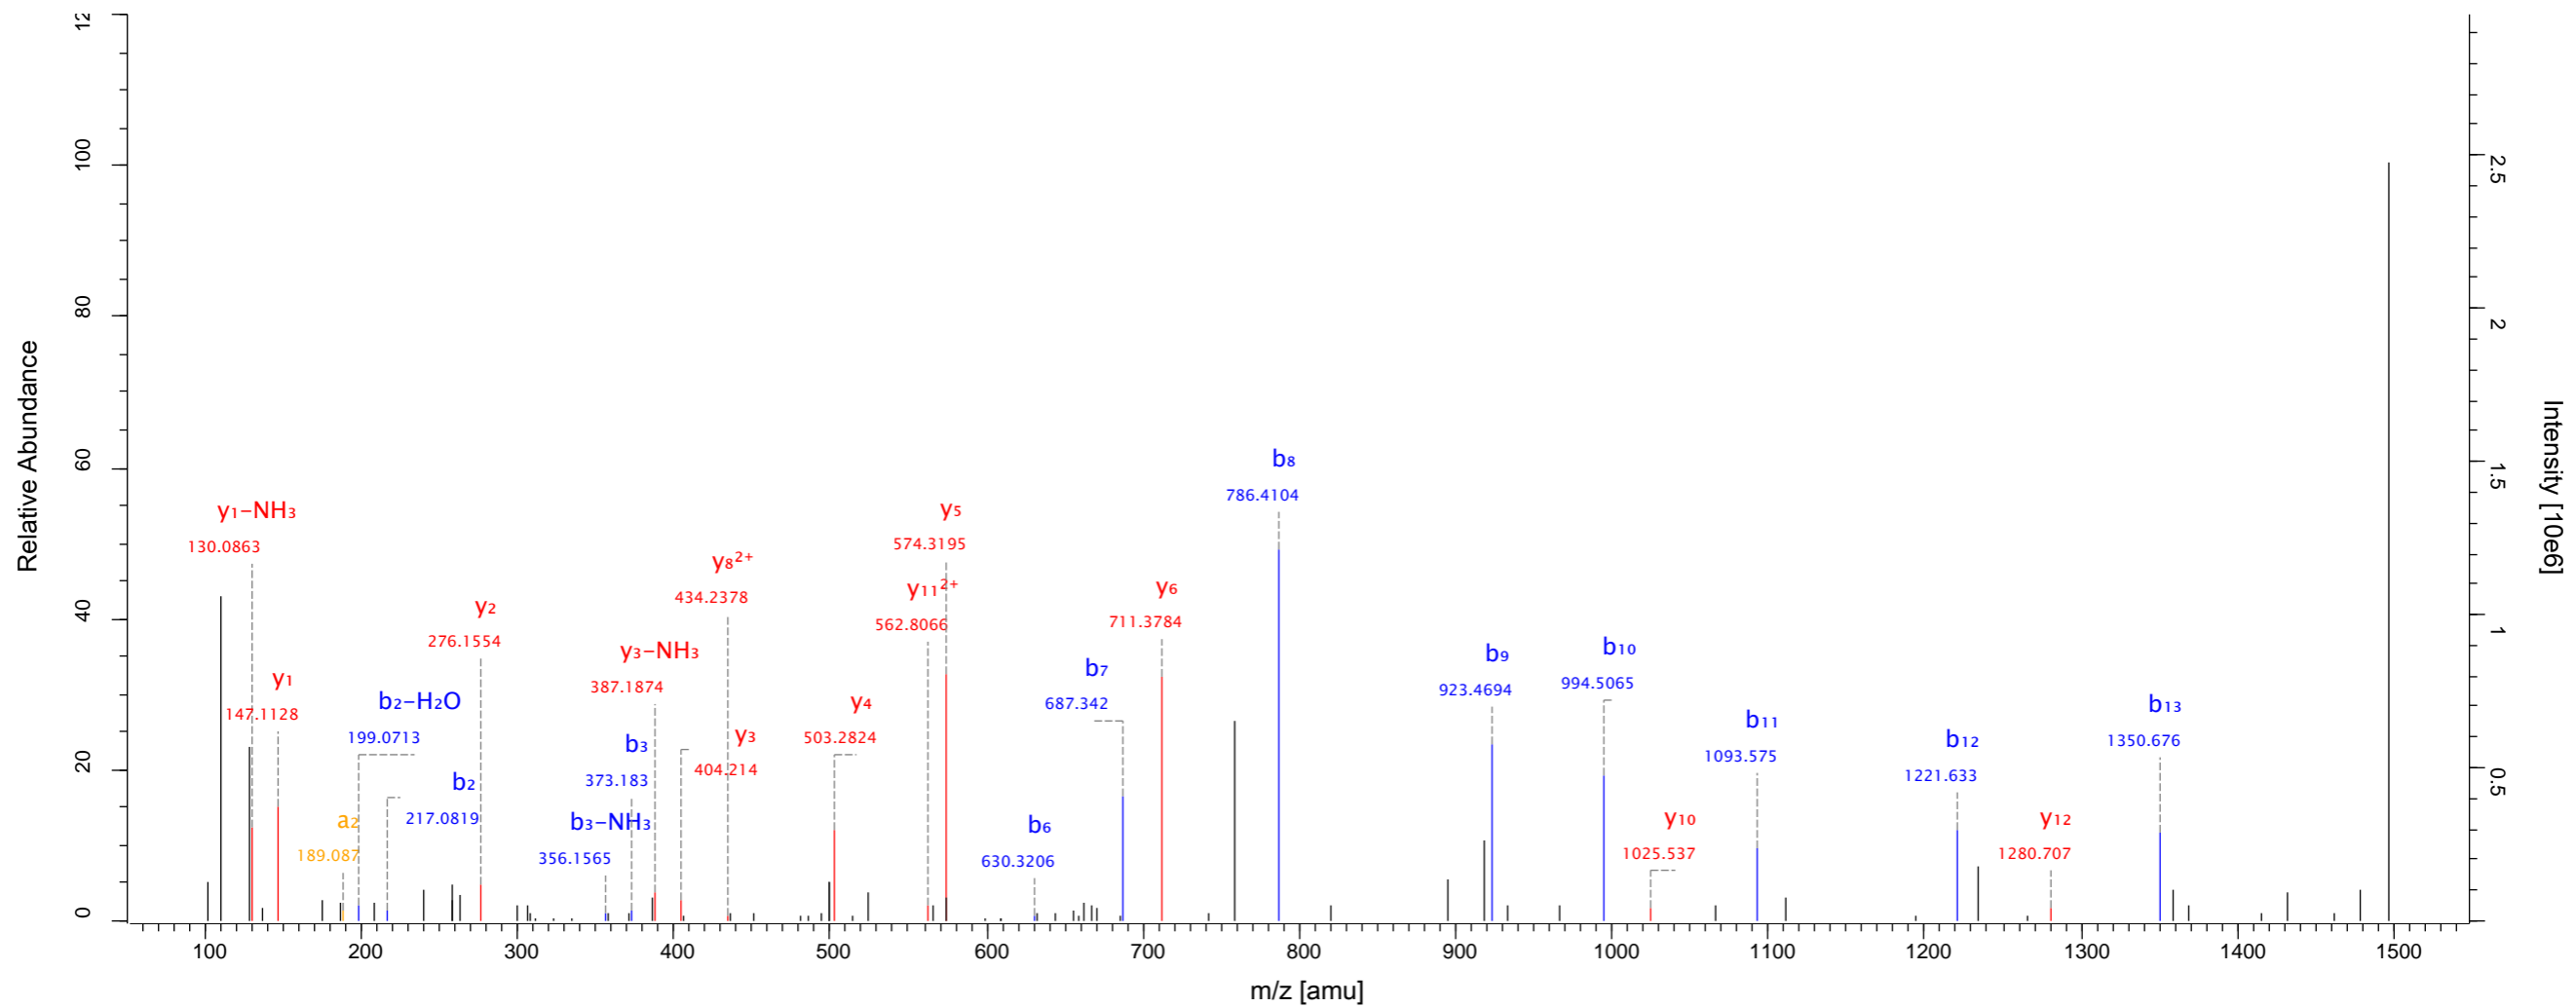

Raw file: 20111212\_EXQ5\_AnMi\_QC\_HCMVp11\_34  
Scan number: 10241  
Protein: ORFL18W + NC\_006273.2[8020,8253]+ <unknown description>  
Peptide score: 79.15  
Method: FTMS; HCD

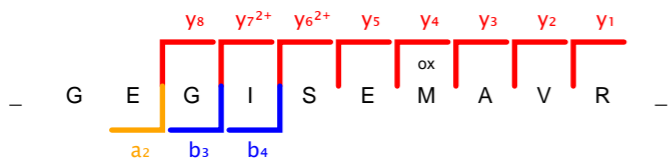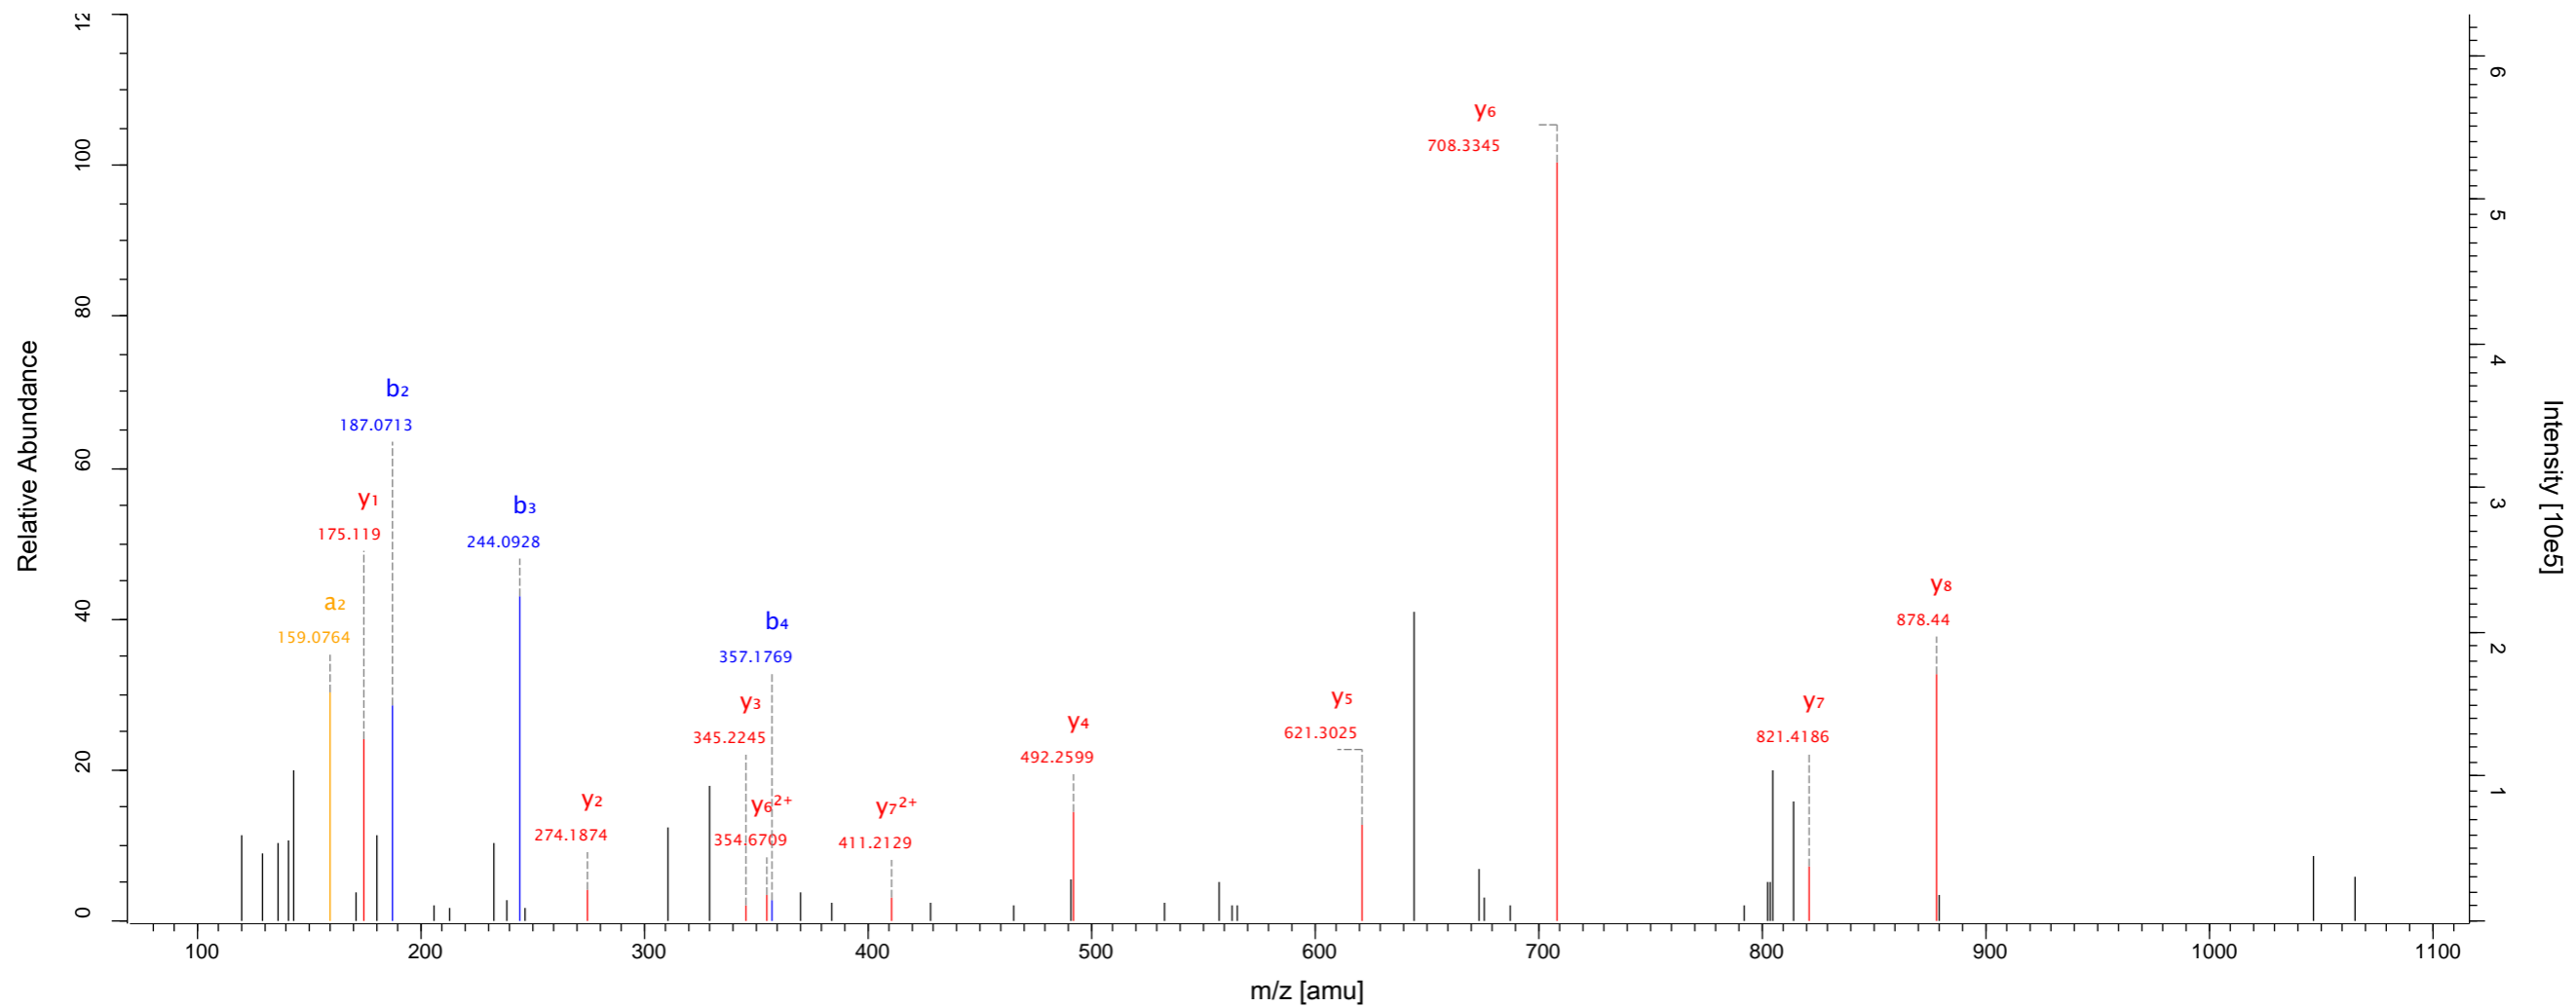

Raw file: 20111212\_EXQ5\_AnMi\_QC\_HCMVpl1\_34  
Scan number: 11522  
Protein: ORFL301C - NC\_006273.2[185358,185666]- <unknown description>  
Peptide score: 88.18  
Method: FTMS; HCD

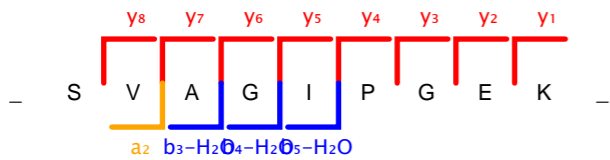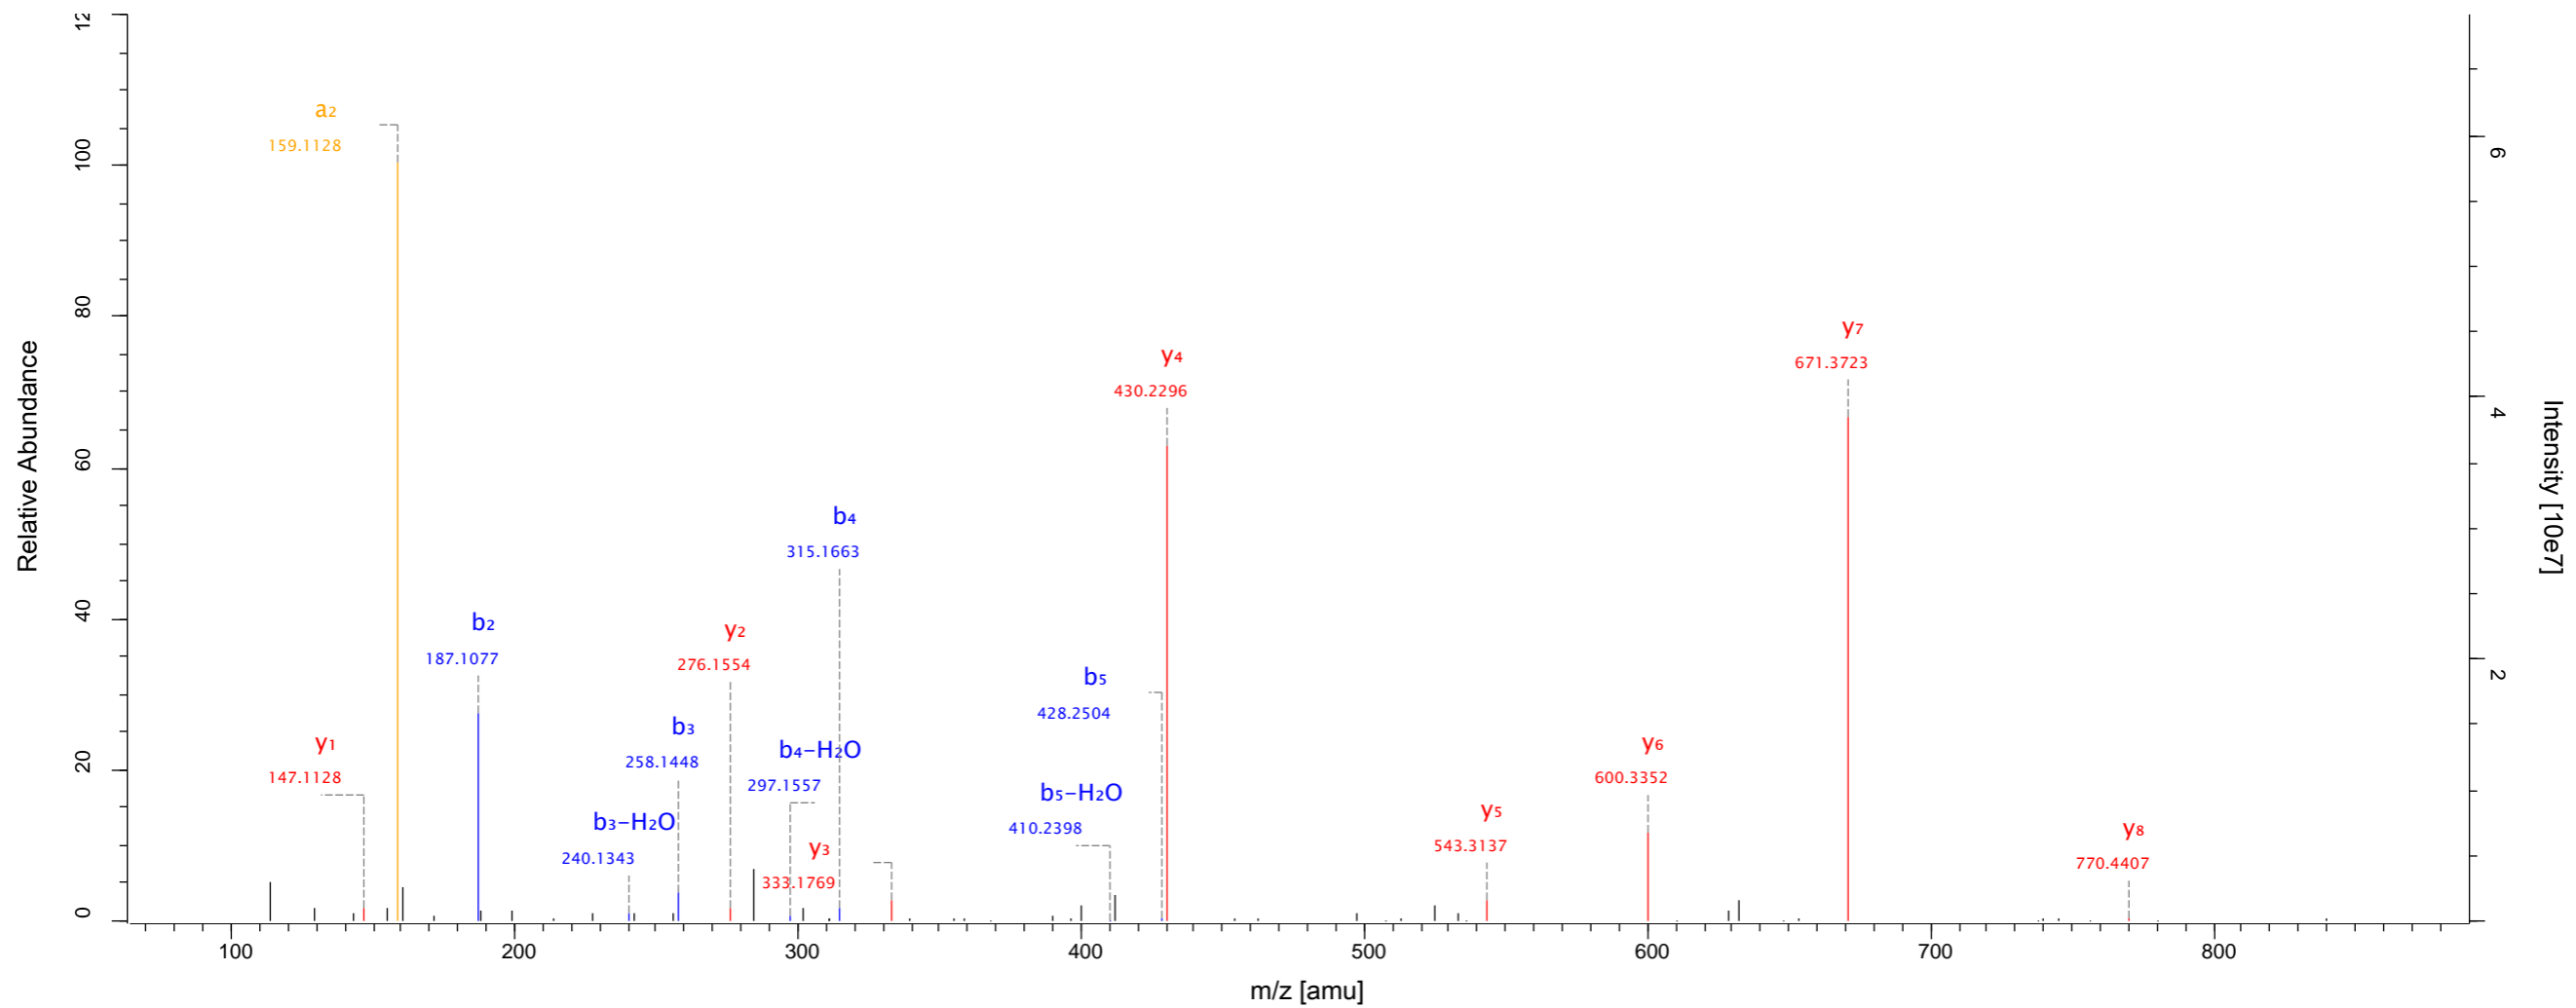

Raw file: 20111212\_EXQ5\_AnMi\_QC\_HCMVp11\_34  
Scan number: 12310  
Protein: ORFL137W.IORF1 + NC\_006273.2[75299,75529]+ <unknown description>  
Peptide score: 128.69  
Method: FTMS; HCD

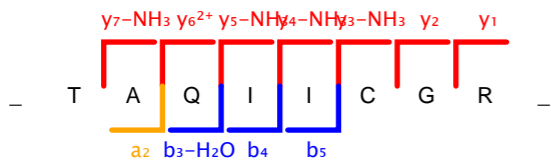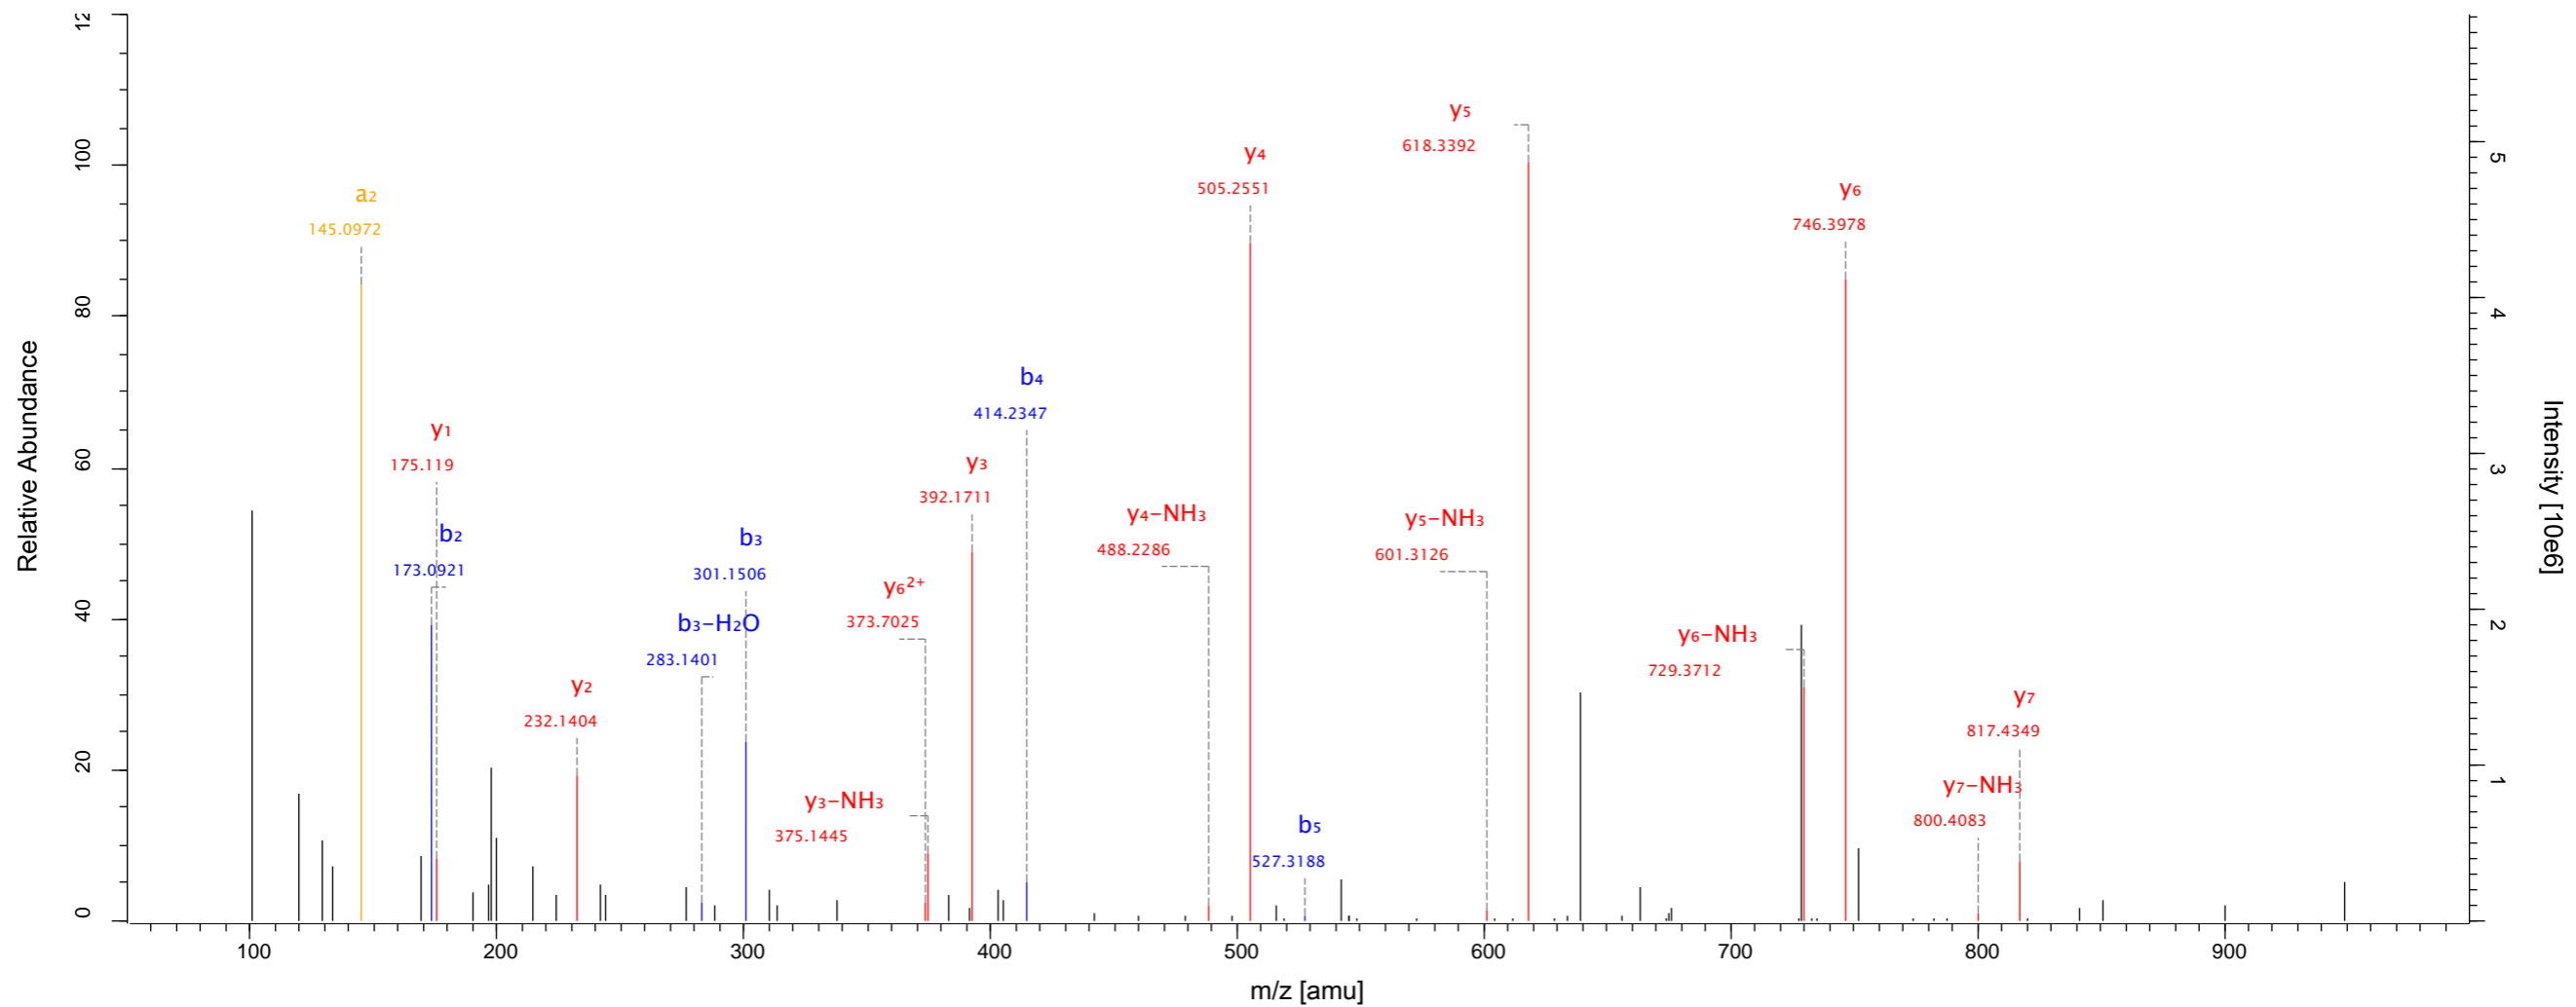

Raw file: 20111212\_EXQ5\_AnMi\_QC\_HCMVp11\_34  
Scan number: 14863  
Protein: ORFL27C - NC\_006273.2[7912,13003]- <unknown description>; ORFL27C.iORF1 - NC\_006273.2[7912,8184]- <unknown description>  
Peptide score: 56.72  
Method: FTMS; HCD

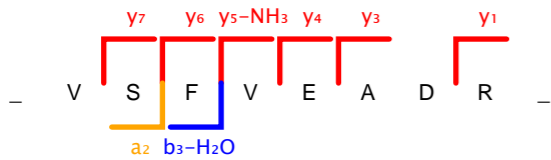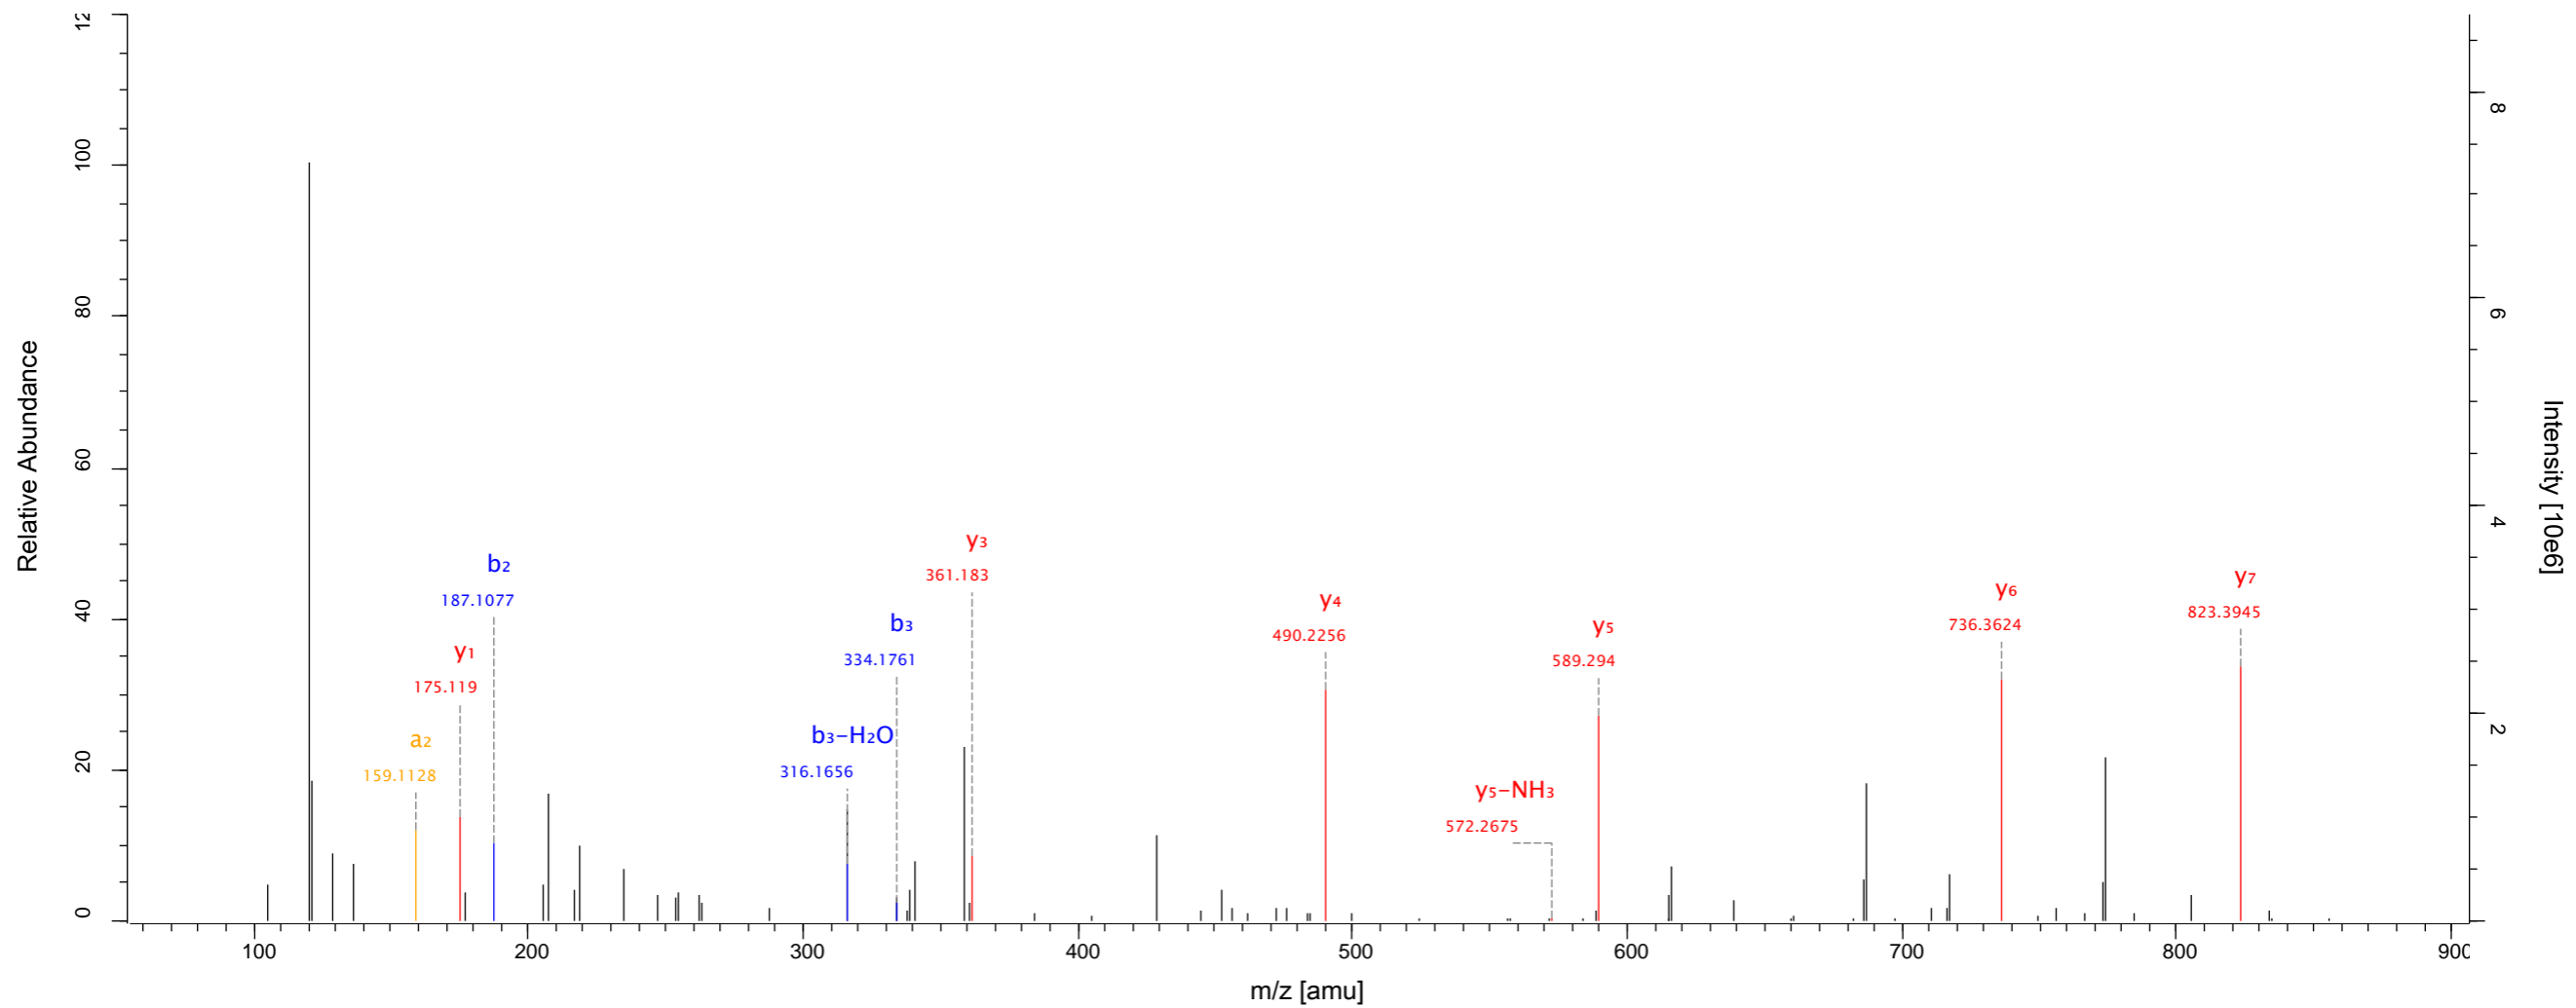

Raw file: 20111212\_EXQ5\_AnMi\_QC\_HCMVp11\_34  
Scan number: 17577  
Protein: ORFL253W.iORF3 + NC\_006273.2[162059,162286]+ <unknown description>  
Peptide score: 106.62  
Method: FTMS; HCD

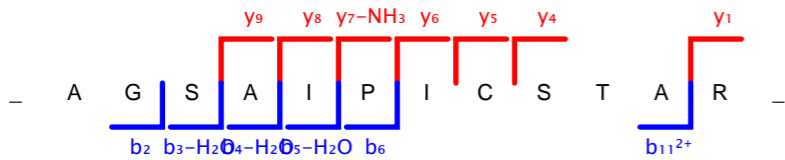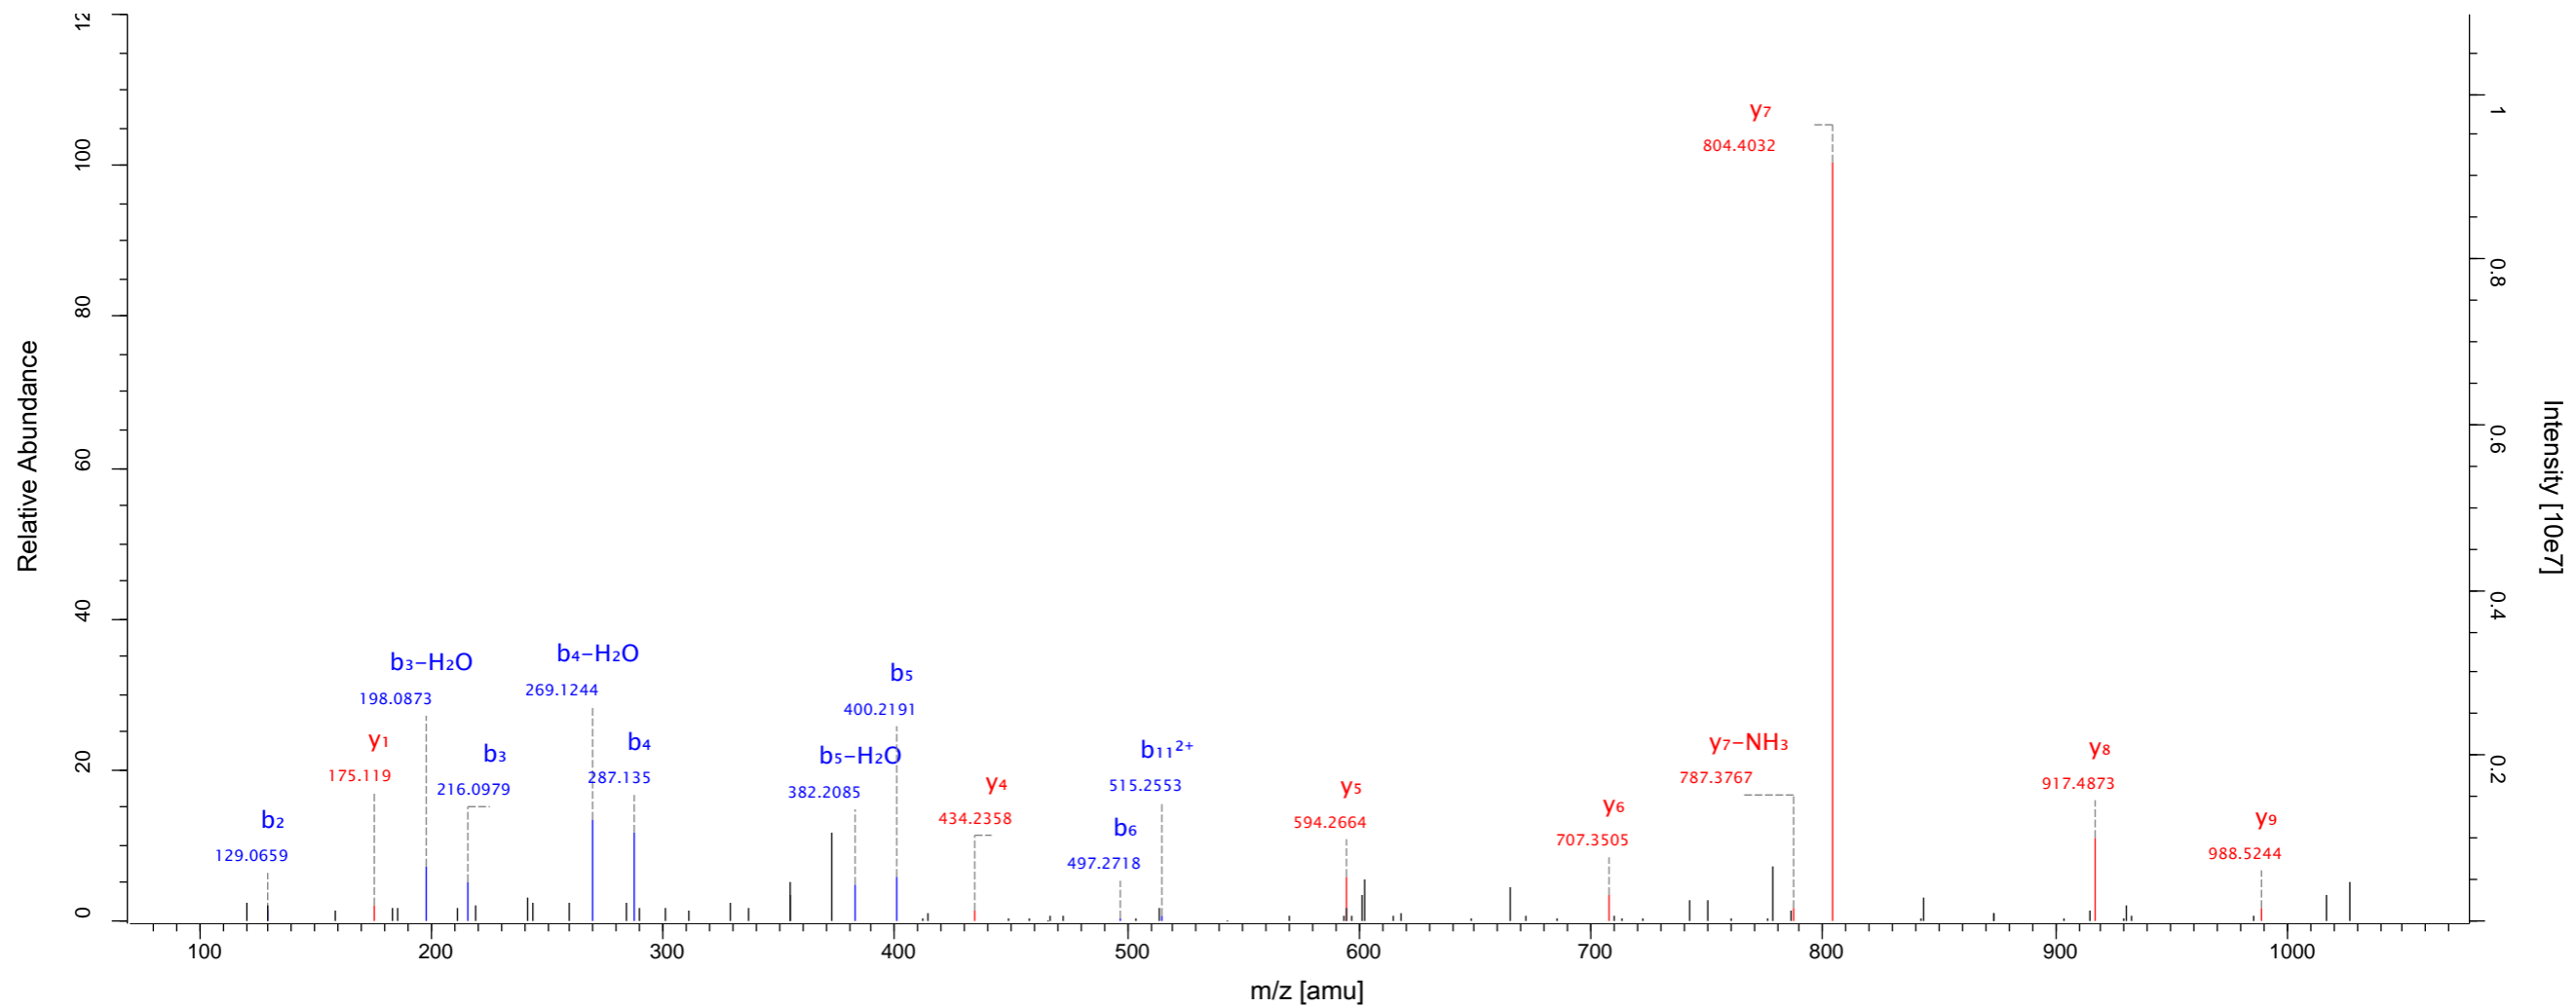

Raw file: 20111212\_EXQ5\_AnMi\_QC\_HCMVp1\_34  
Scan number: 18035  
Protein: ORFL121C - NC\_006273.2[65579,65851]- <unknown description>  
Peptide score: 97.97  
Method: FTMS; HCD

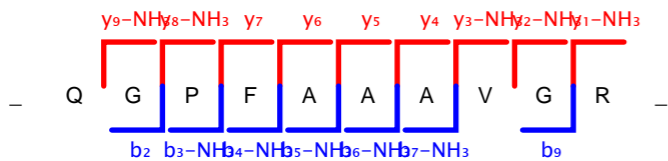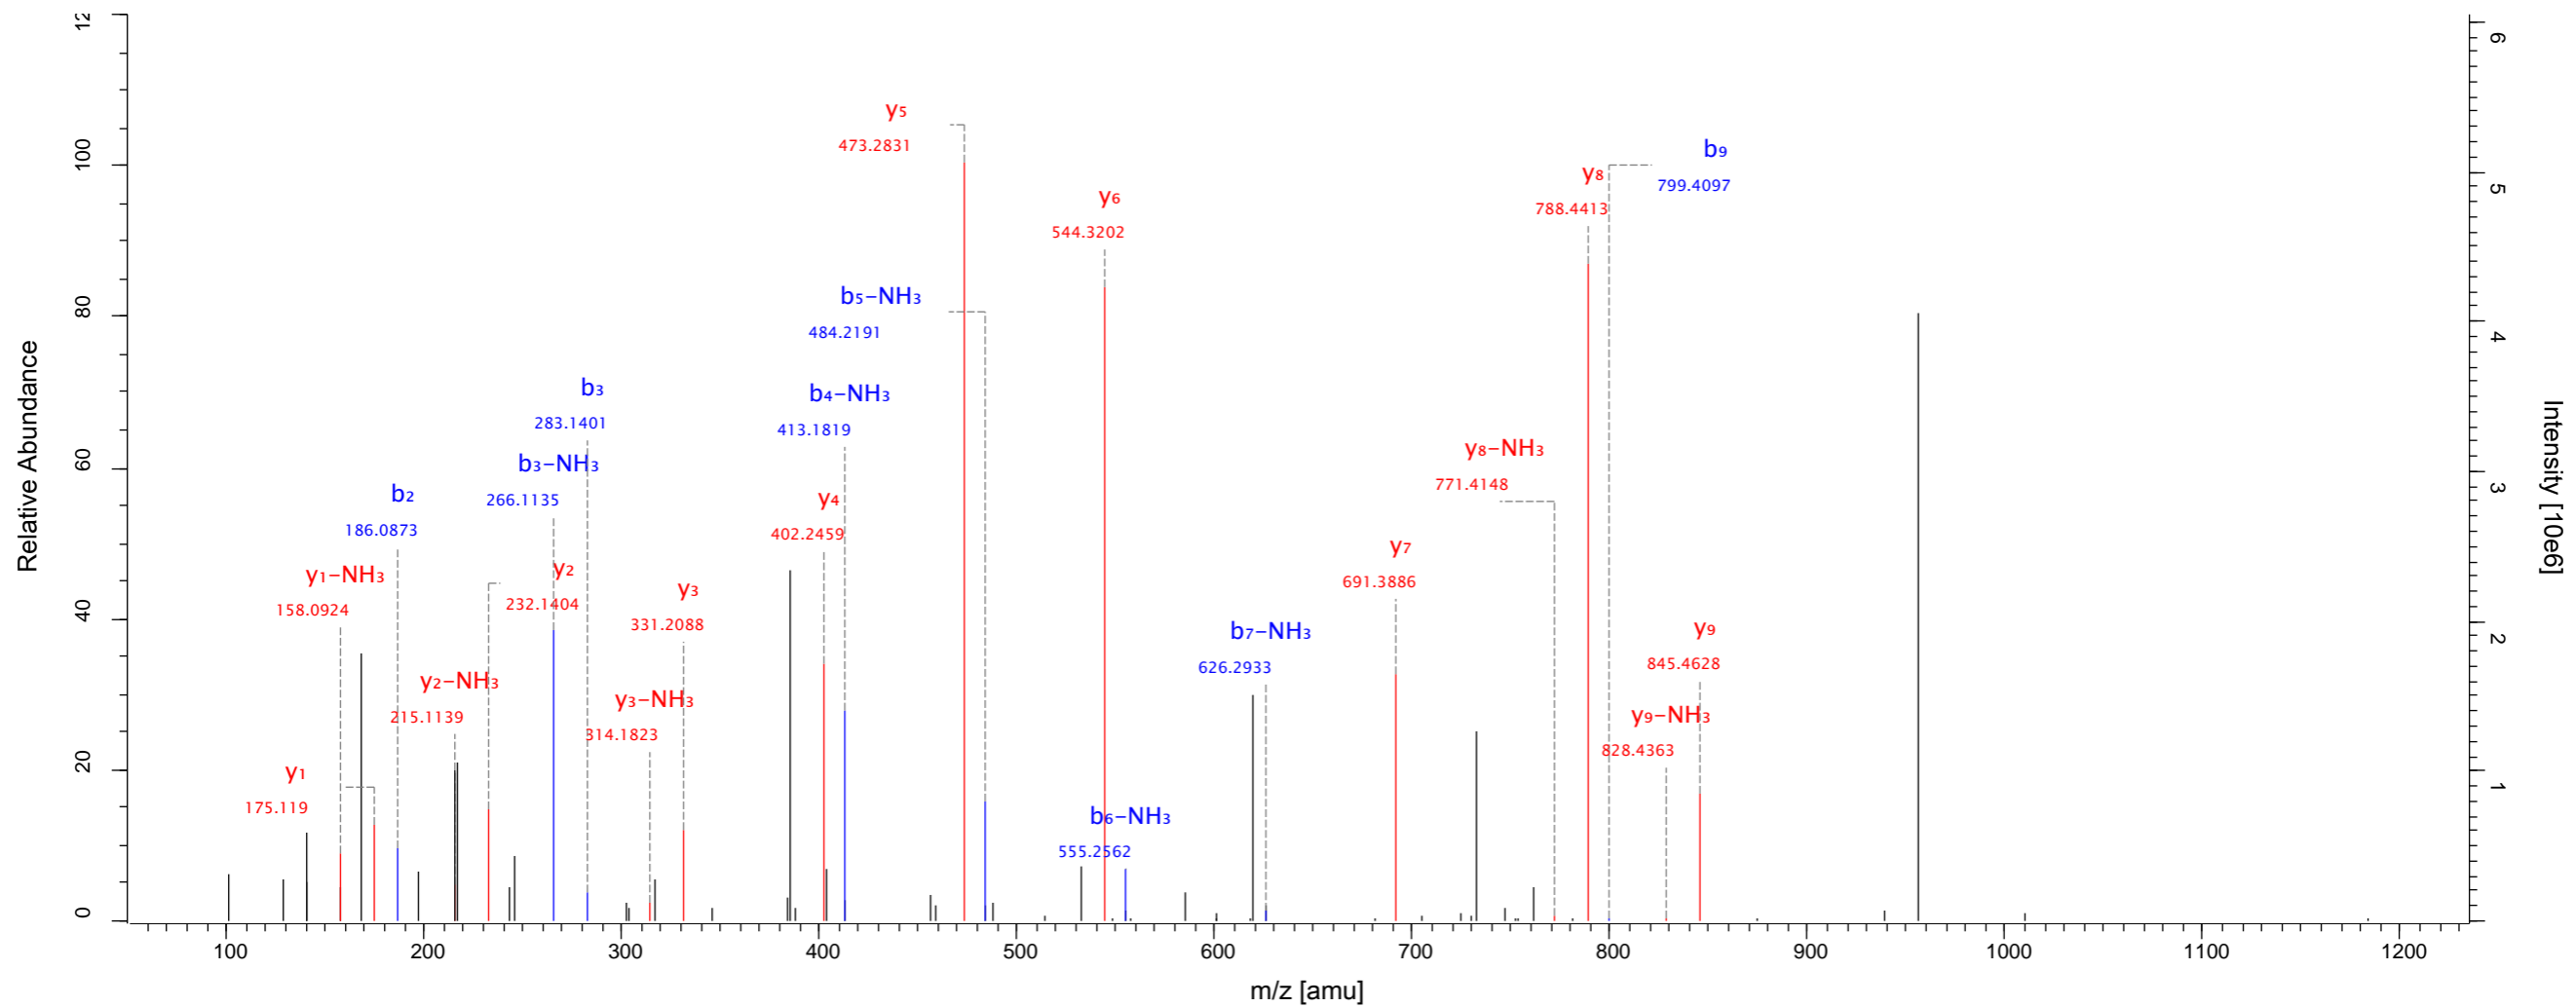



Raw file: 20111212\_EXQ5\_AnMi\_QC\_HCMVp1\_34  
Scan number: 19077  
Protein: ORFL298W + NC\_006273.2[184737,184916]+ <unknown description>  
Peptide score: 83.87  
Method: FTMS; HCD

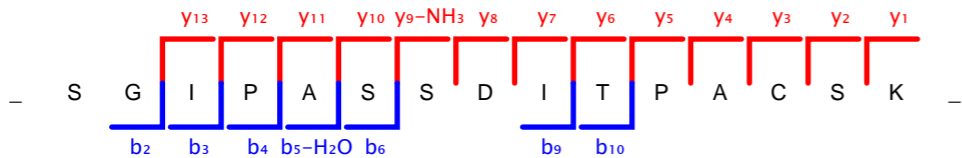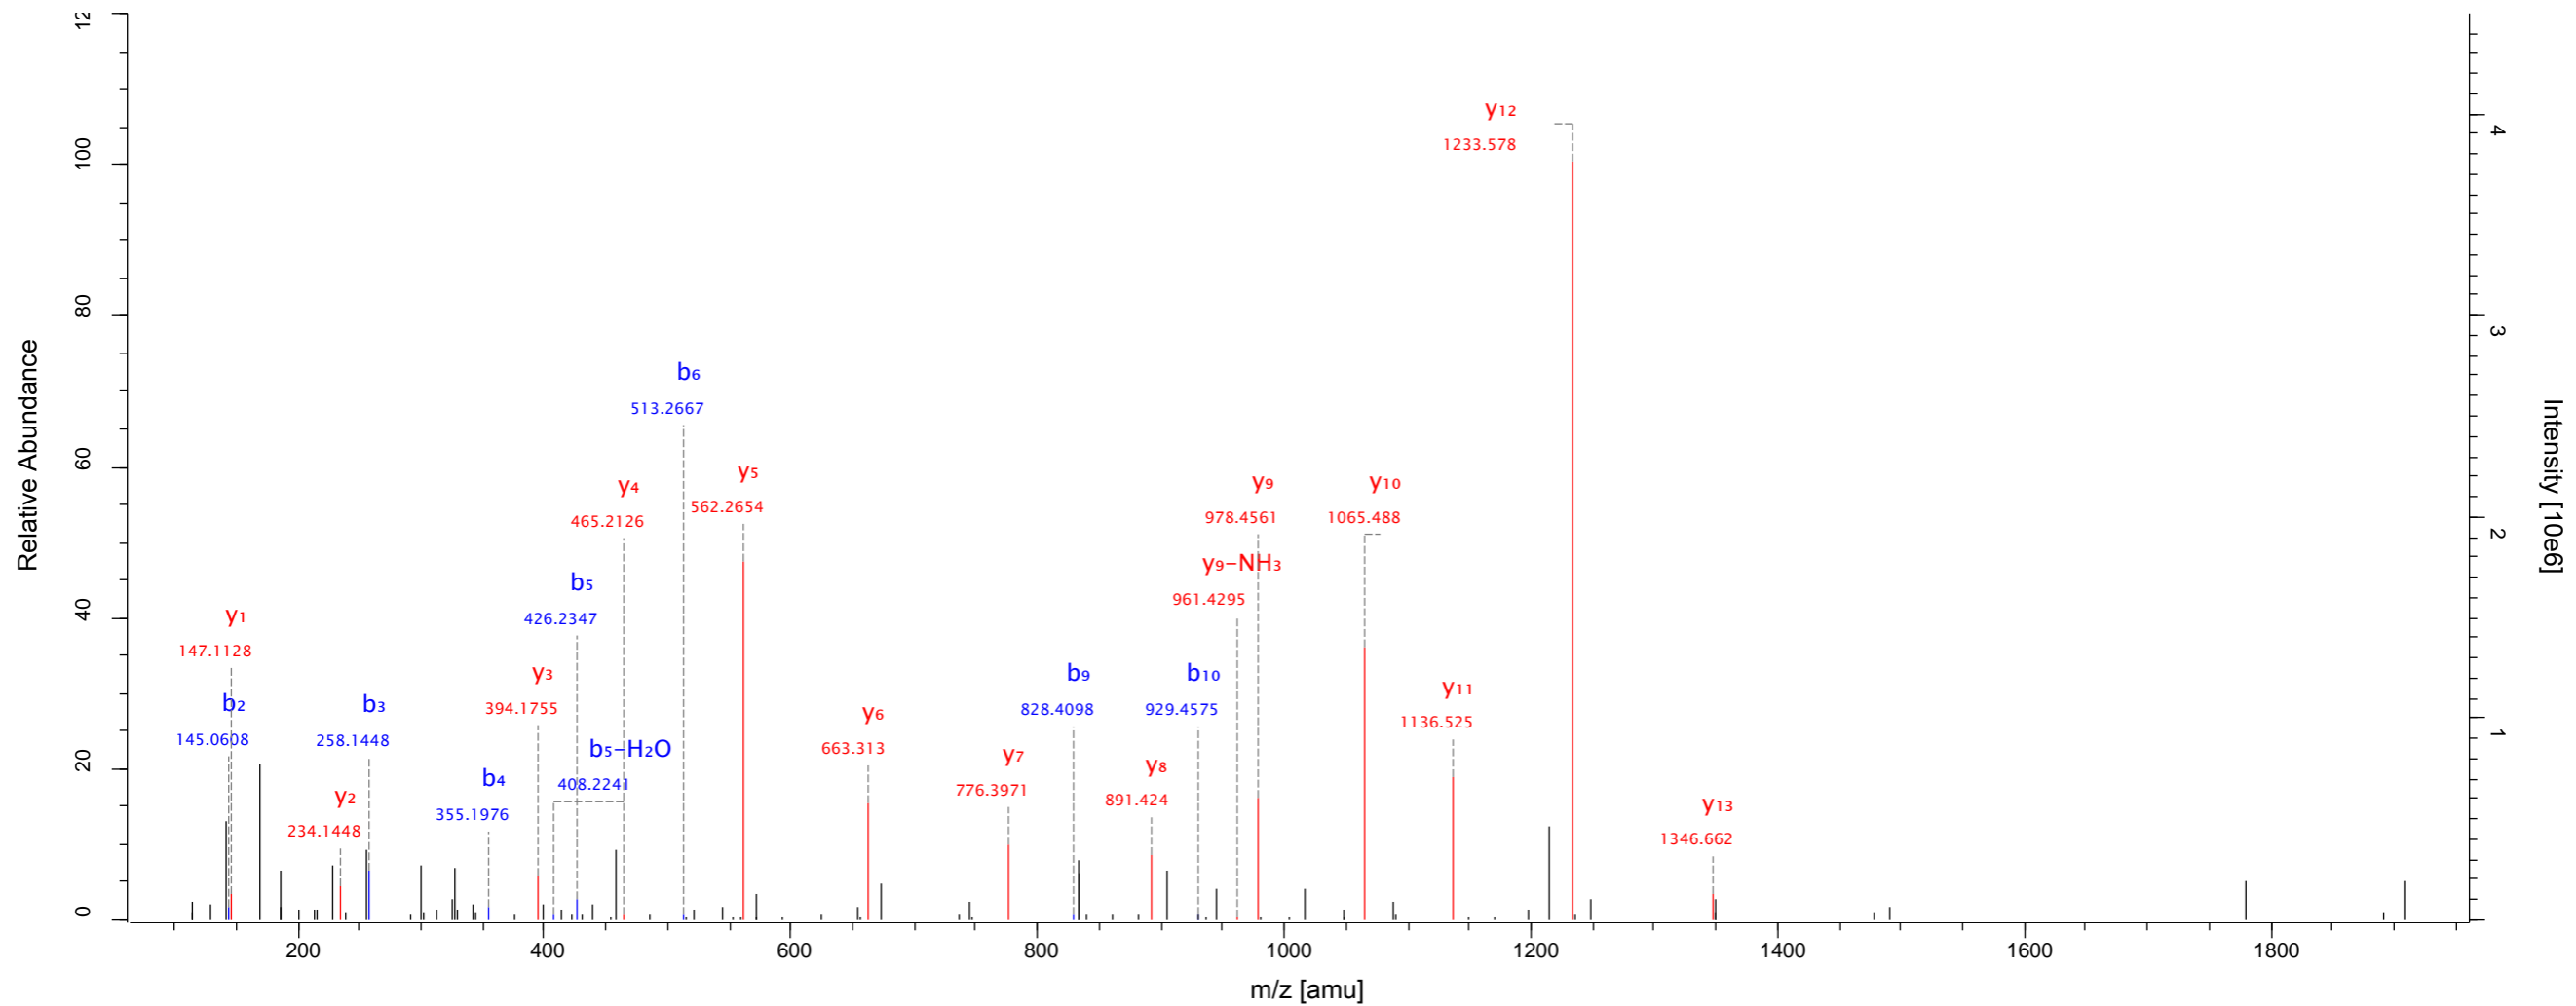

Raw file: 20111212\_EXQ5\_AnMi\_QC\_HCMVp1\_34  
Scan number: 19716  
Protein: ORFL294W.iORF1 + NC\_006273.2[183230,193441]+ <unknown description>; ORFL294W + NC\_006273.2[183230,193441]+ <unknown description>  
Peptide score: 72.64  
Method: FTMS; HCD

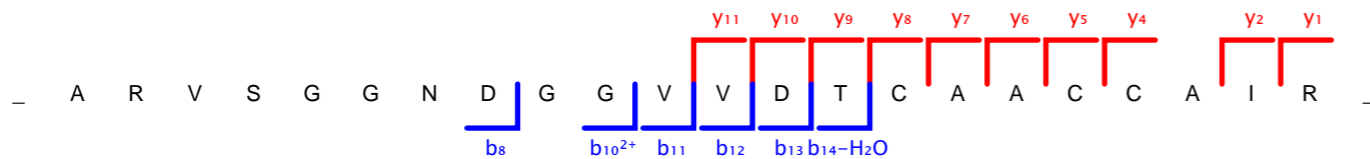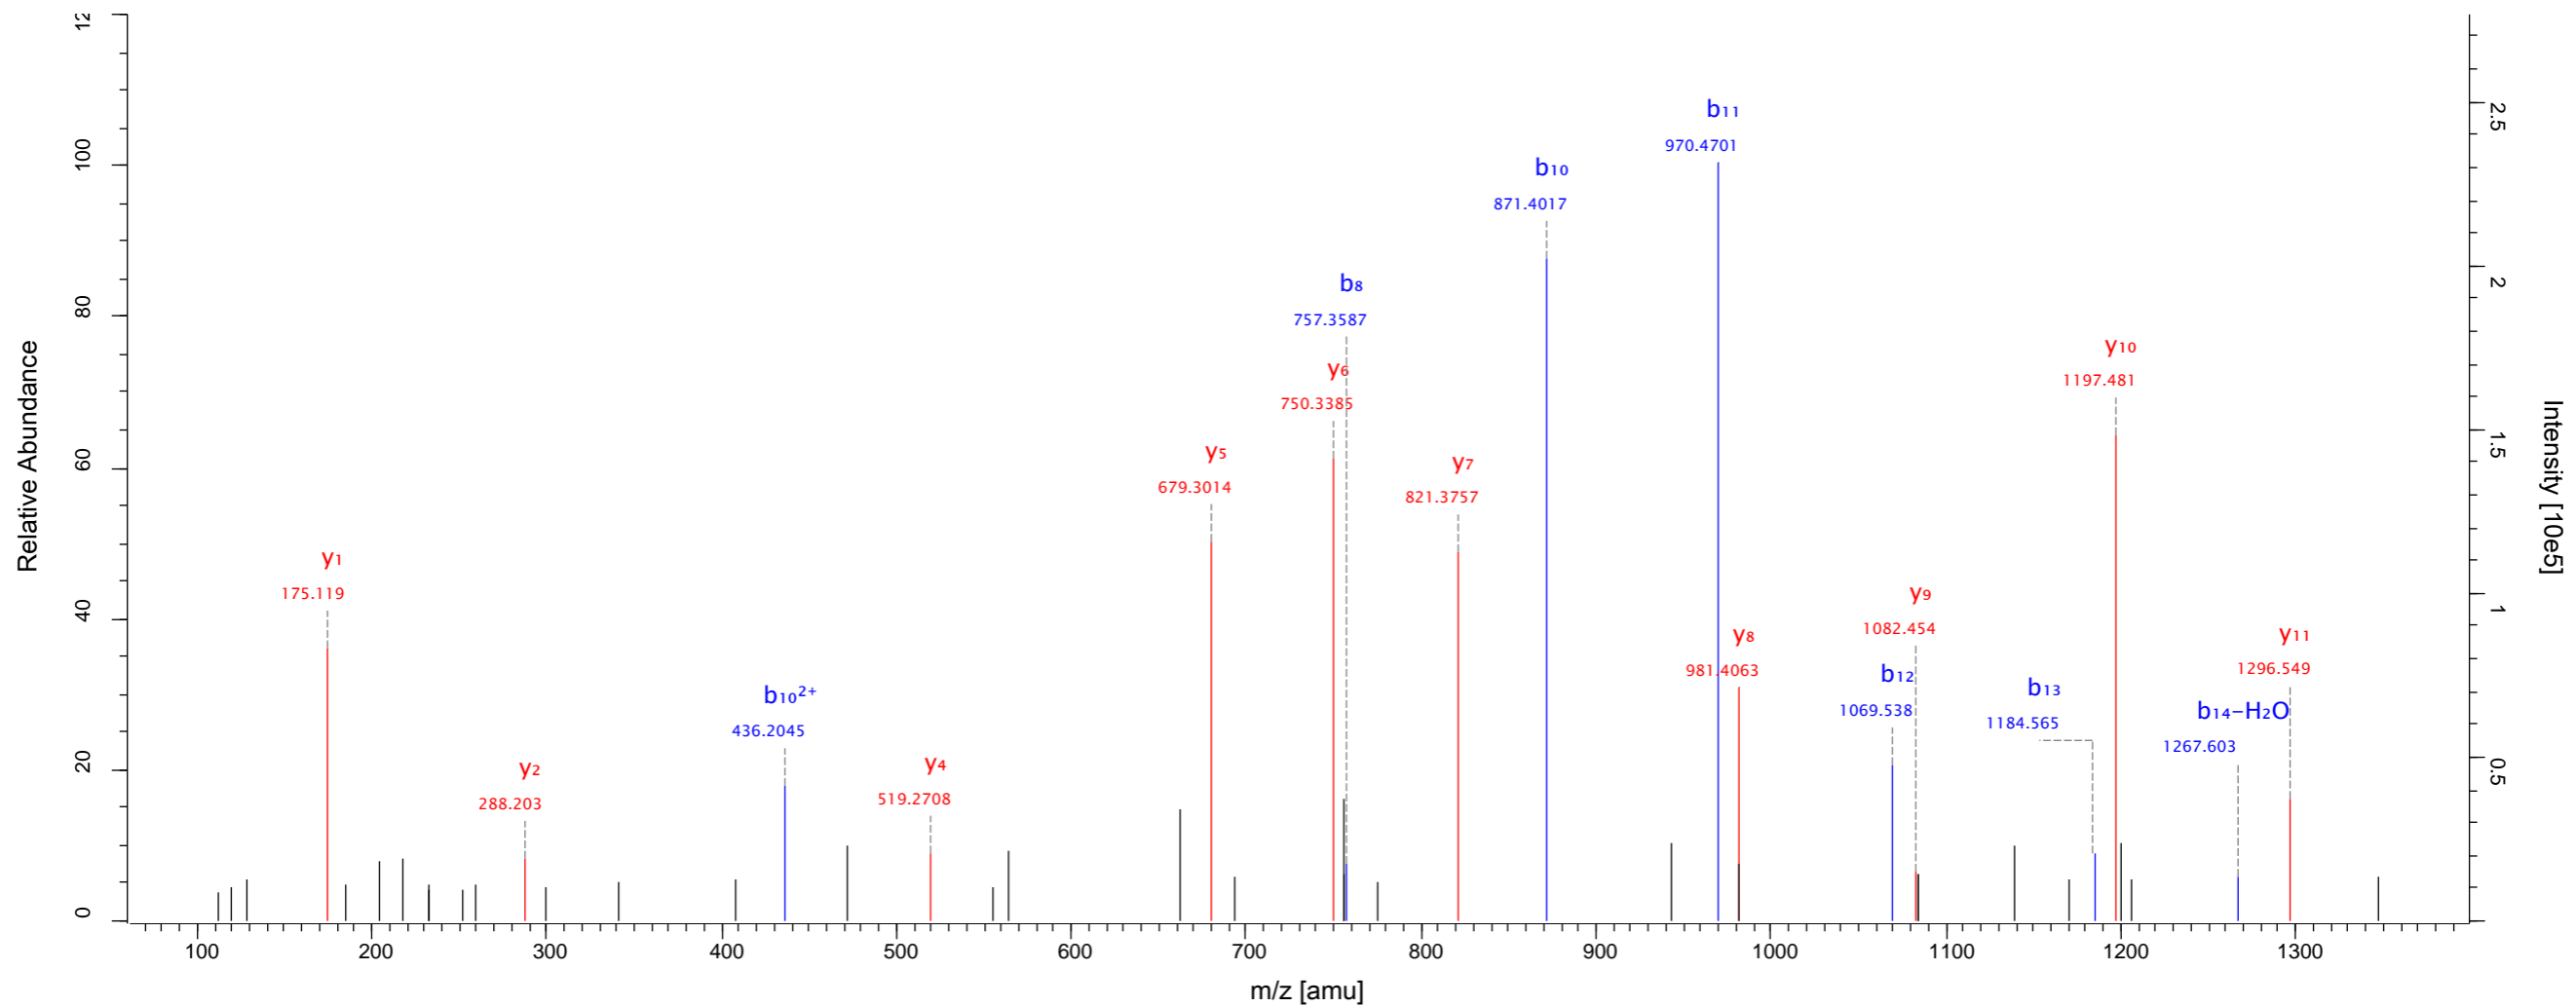

Raw file: 20111212\_EXQ5\_AnMi\_QC\_HCMVp1\_34  
 Scan number: 21160  
 Protein: ORFL106C - NC\_006273.2[53935,54294]- <unknown description>  
 Peptide score: 176.66  
 Method: FTMS; HCD

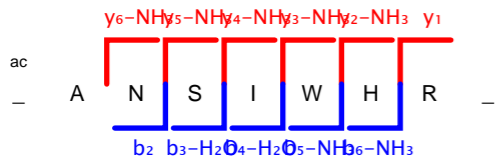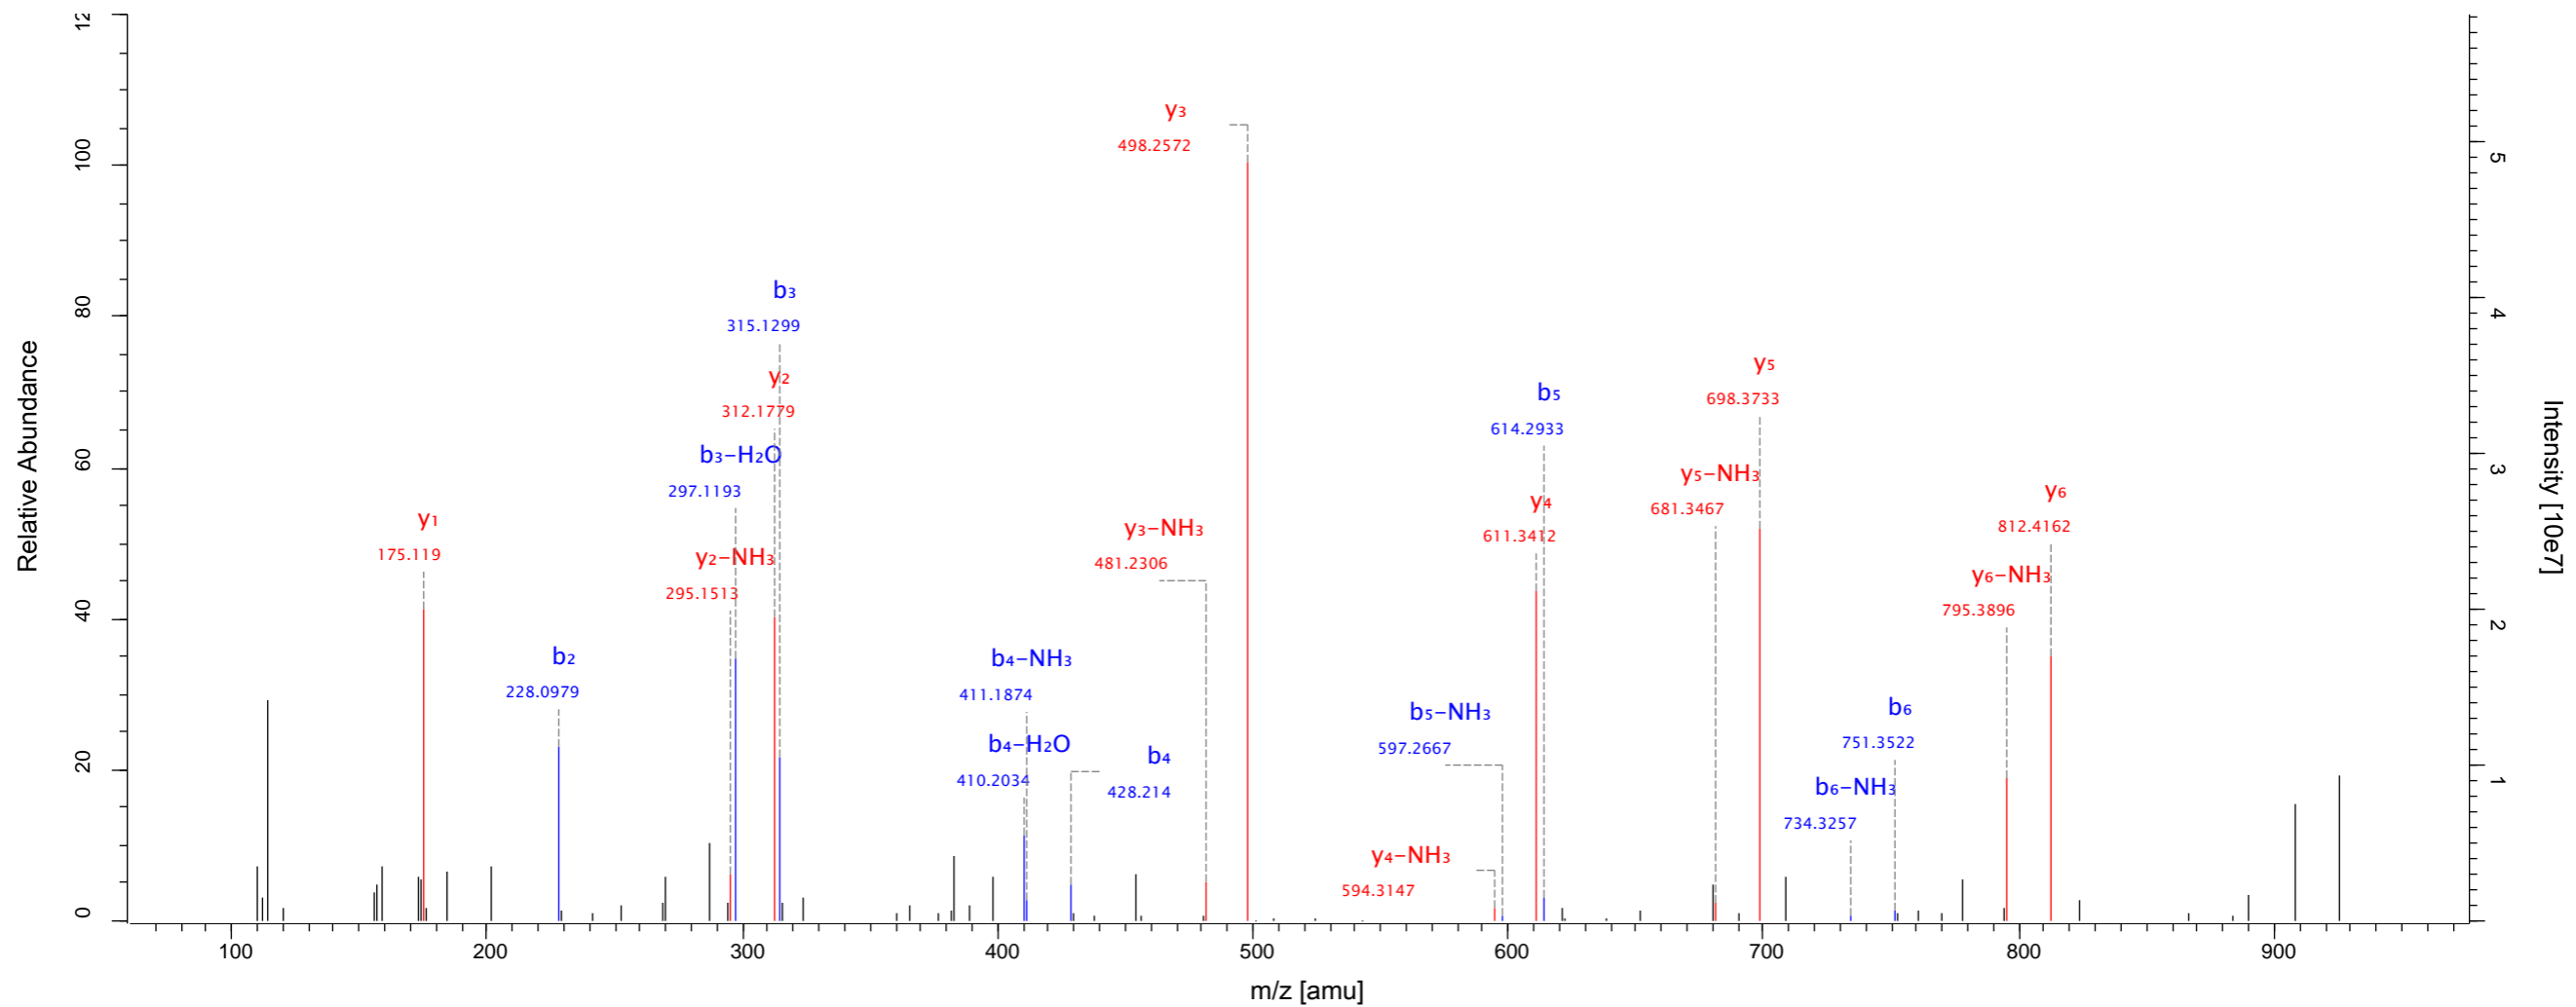

Raw file: 20111212\_EXQ5\_AnMi\_QC\_HCMVp1\_34  
Scan number: 27189  
Protein: ORFL7C - NC\_006273.2[4436,4690]- <unknown description>  
Peptide score: 111.65  
Method: FTMS; HCD

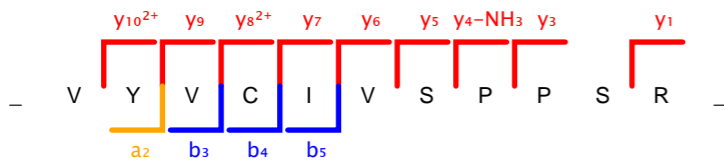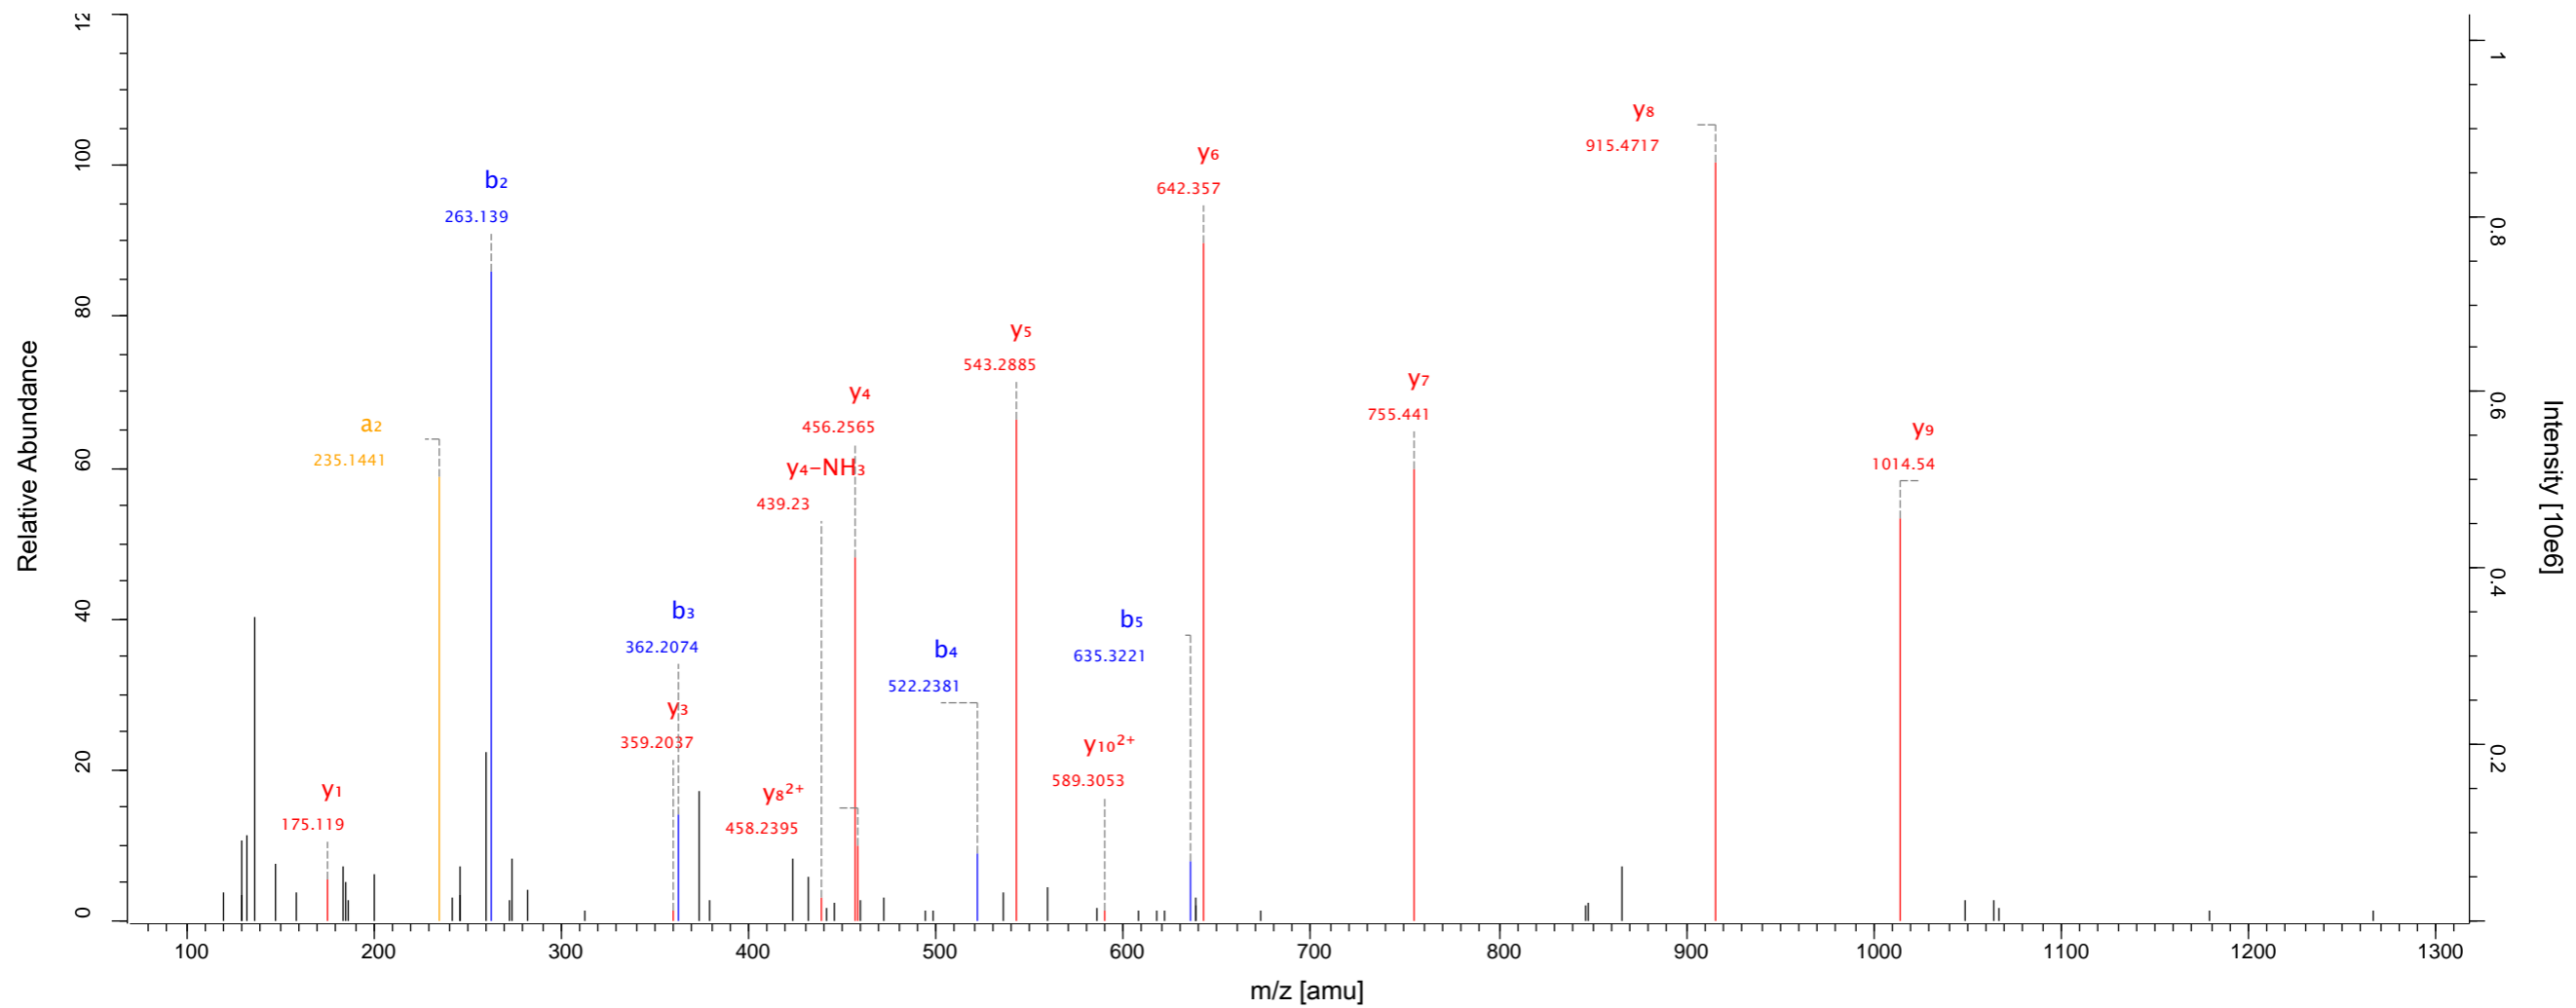

Raw file: 20111212\_EXQ5\_AnMi\_QC\_HCMVpl1\_34  
Scan number: 30477  
Protein: ORFL294W.iORF1 + NC\_006273.2[183230,193441]+ <unknown description>  
Peptide score: 125.5  
Method: FTMS; HCD

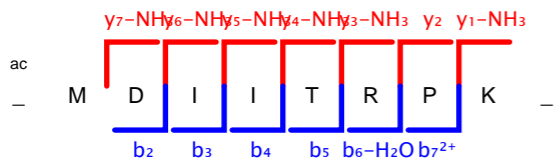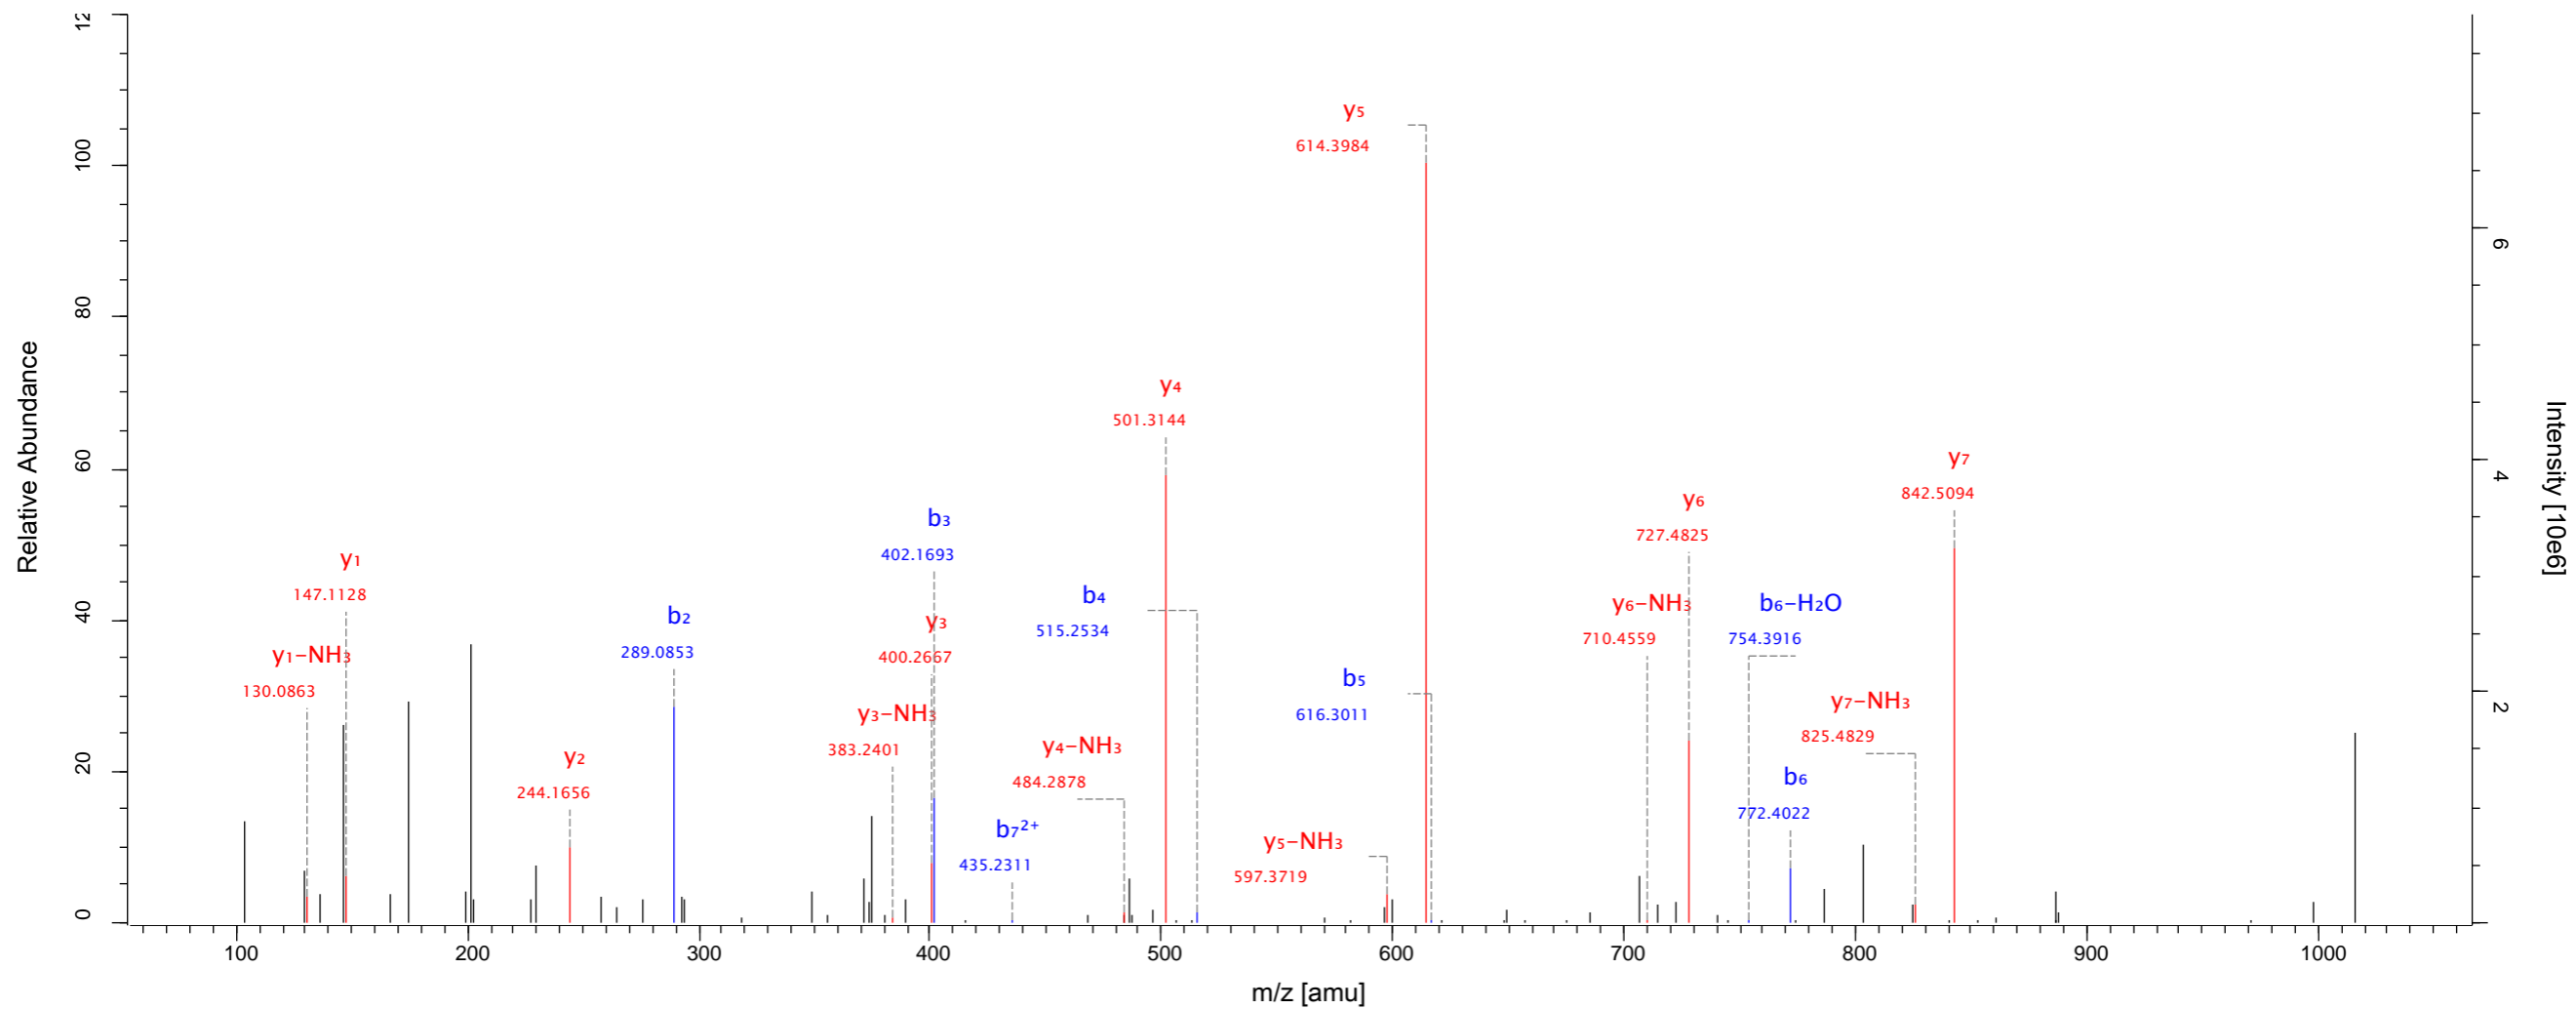

Raw file: 20111212\_EXQ5\_AnMi\_QC\_HCMVp1\_34  
Scan number: 31902  
Protein: ORFL154W + NC\_006273.2[96843,97115]+ <unknown description>; ORFL154W.iORF1 + NC\_006273.2[96972,97115]+ <unknown description>  
Peptide score: 68.07  
Method: FTMS; HCD

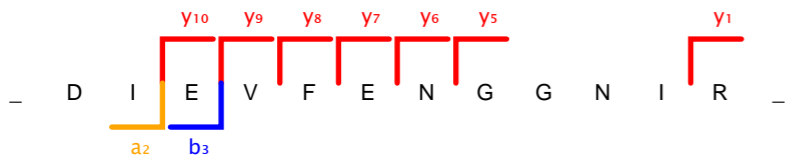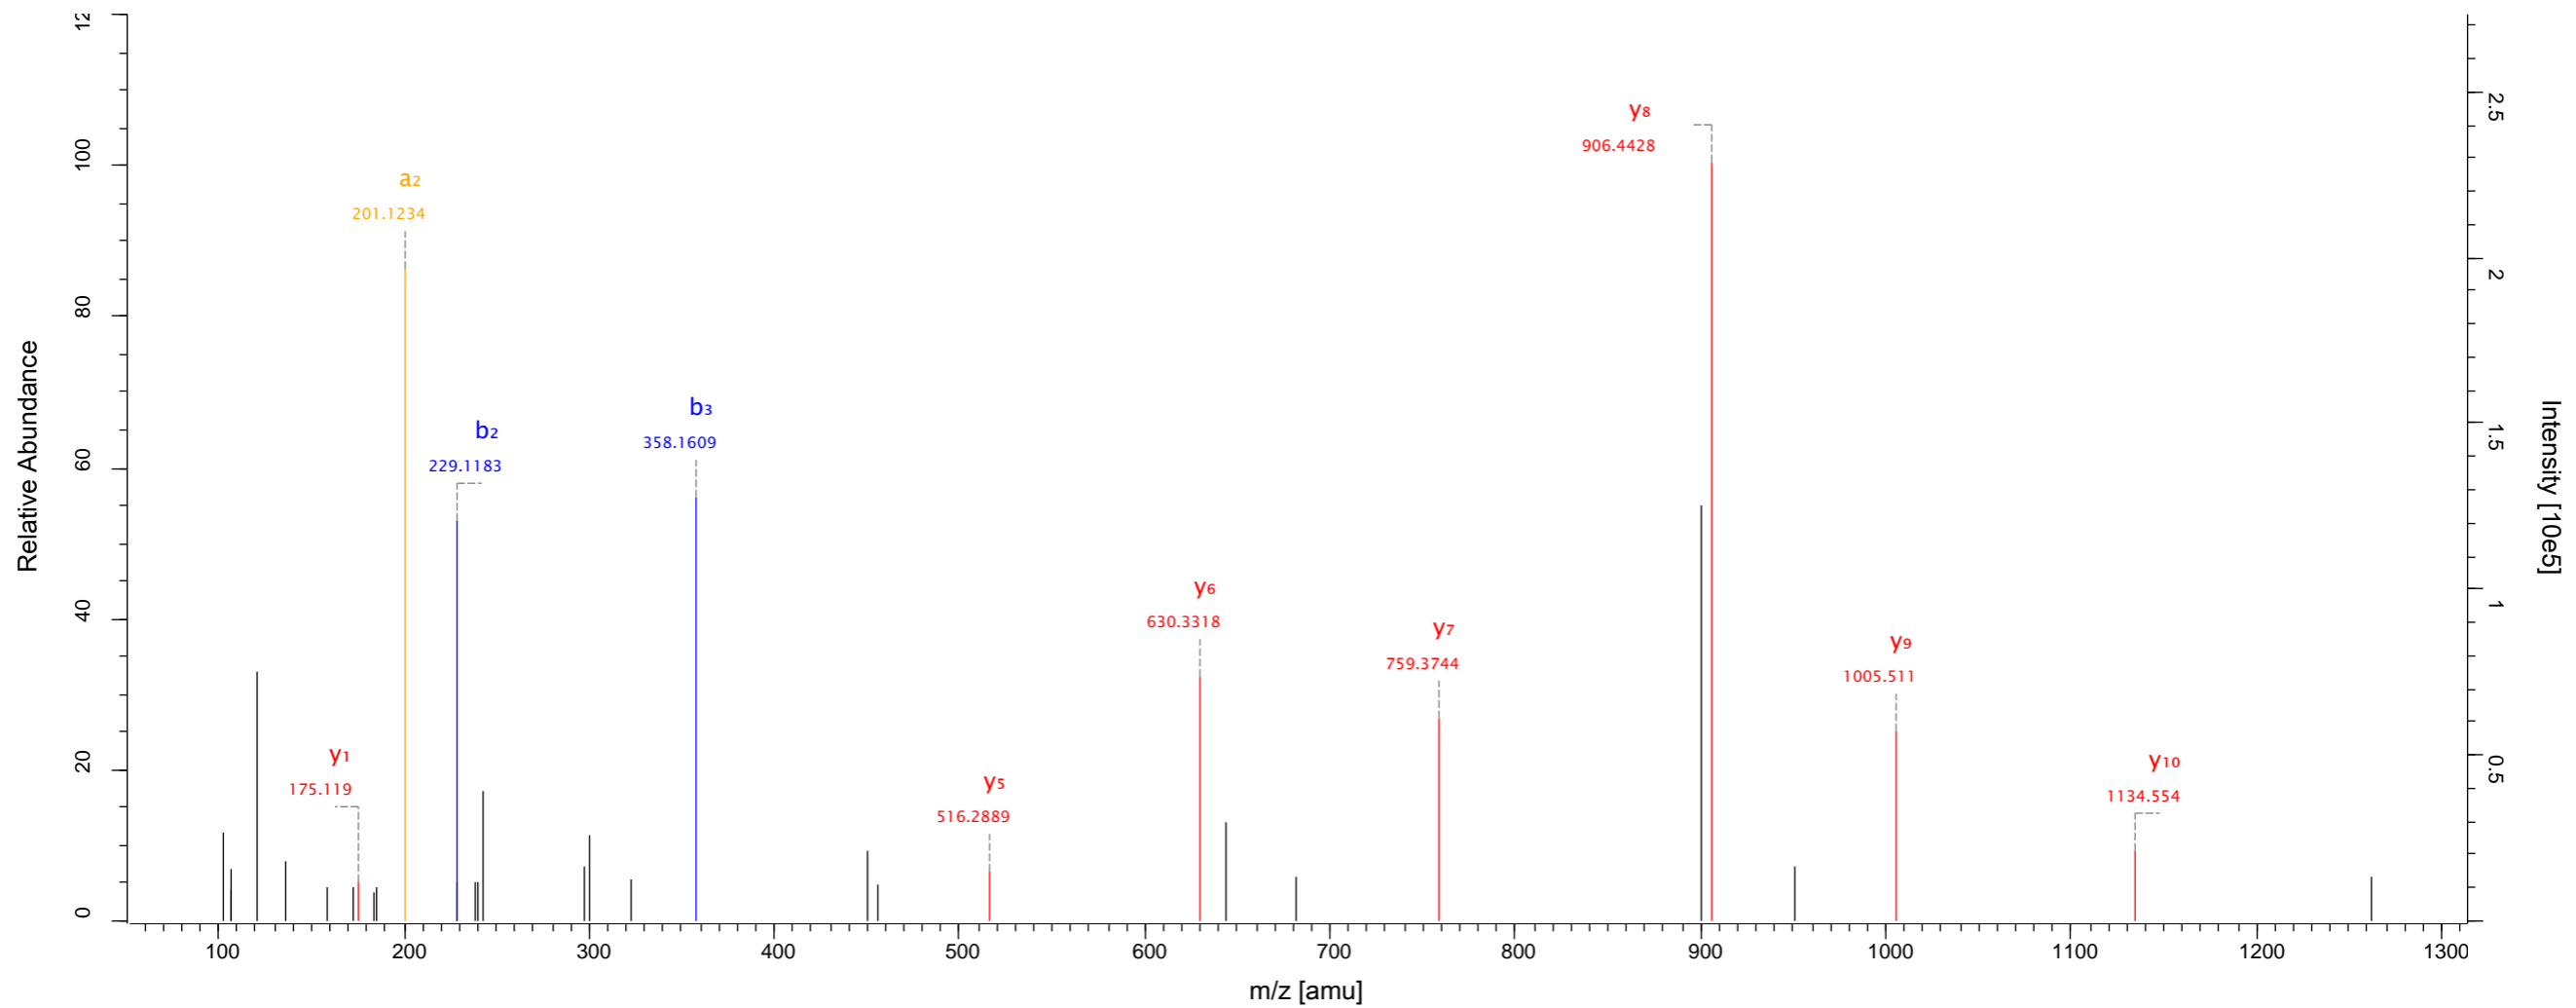

Raw file: 20111212\_EXQ5\_AnMi\_QC\_HCMVp1\_34  
Scan number: 32471  
Protein: ORFL294W + NC\_006273.2[183230,193441]+ <unknown description>  
Peptide score: 120.12  
Method: FTMS; HCD

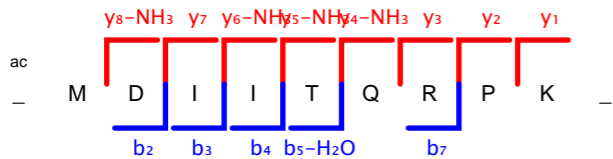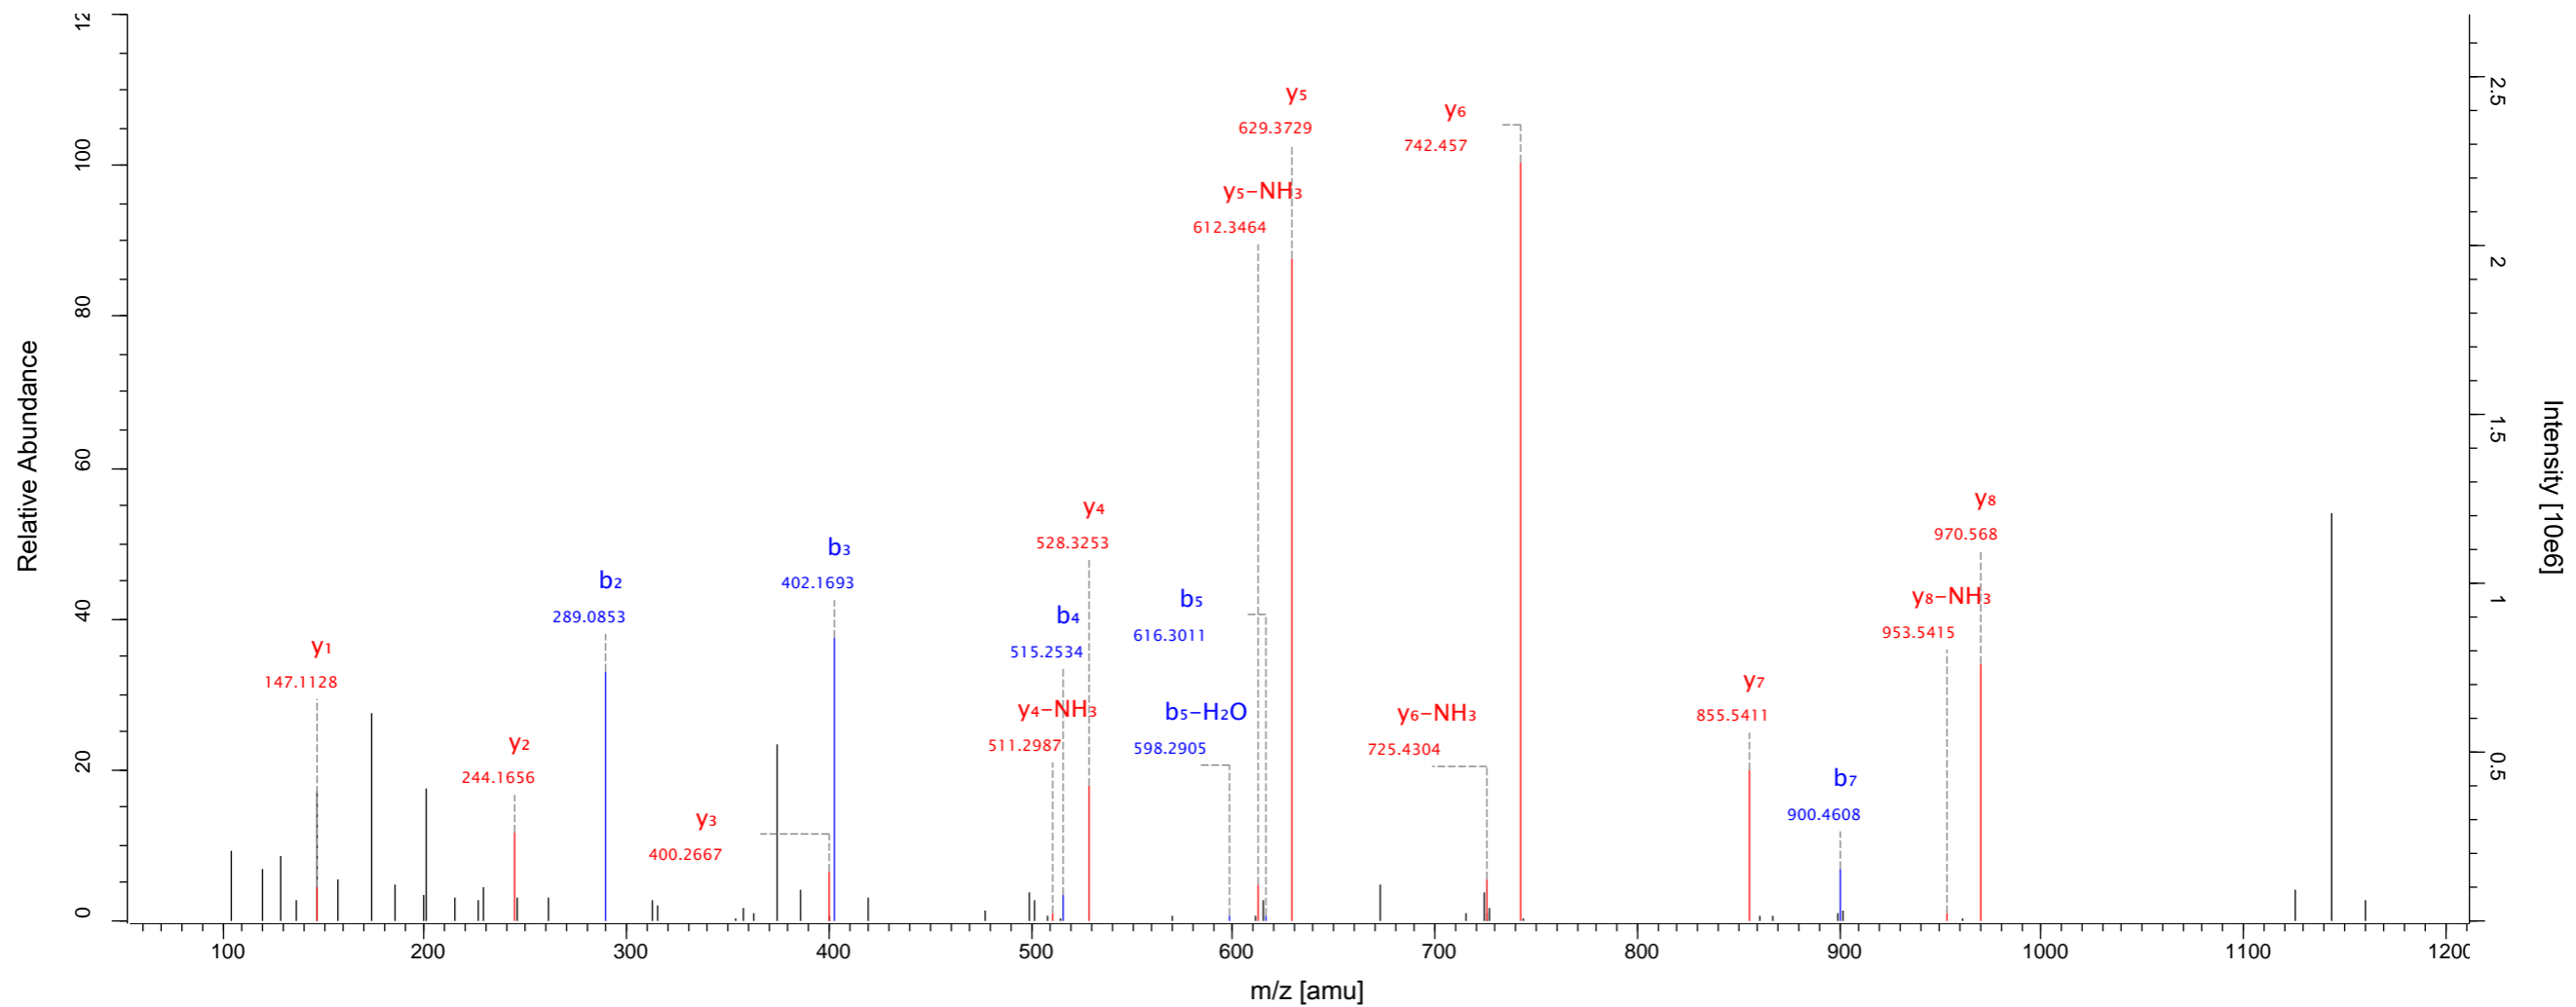

Raw file: 20111212\_EXQ5\_AnMi\_QC\_HCMVp11\_34  
Scan number: 41028  
Protein: ORFL271C.iORF1 - NC\_006273.2[176607,176858]- <unknown description>  
Peptide score: 94.69  
Method: FTMS; HCD

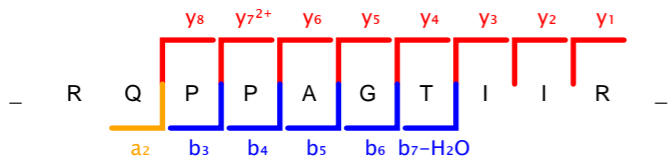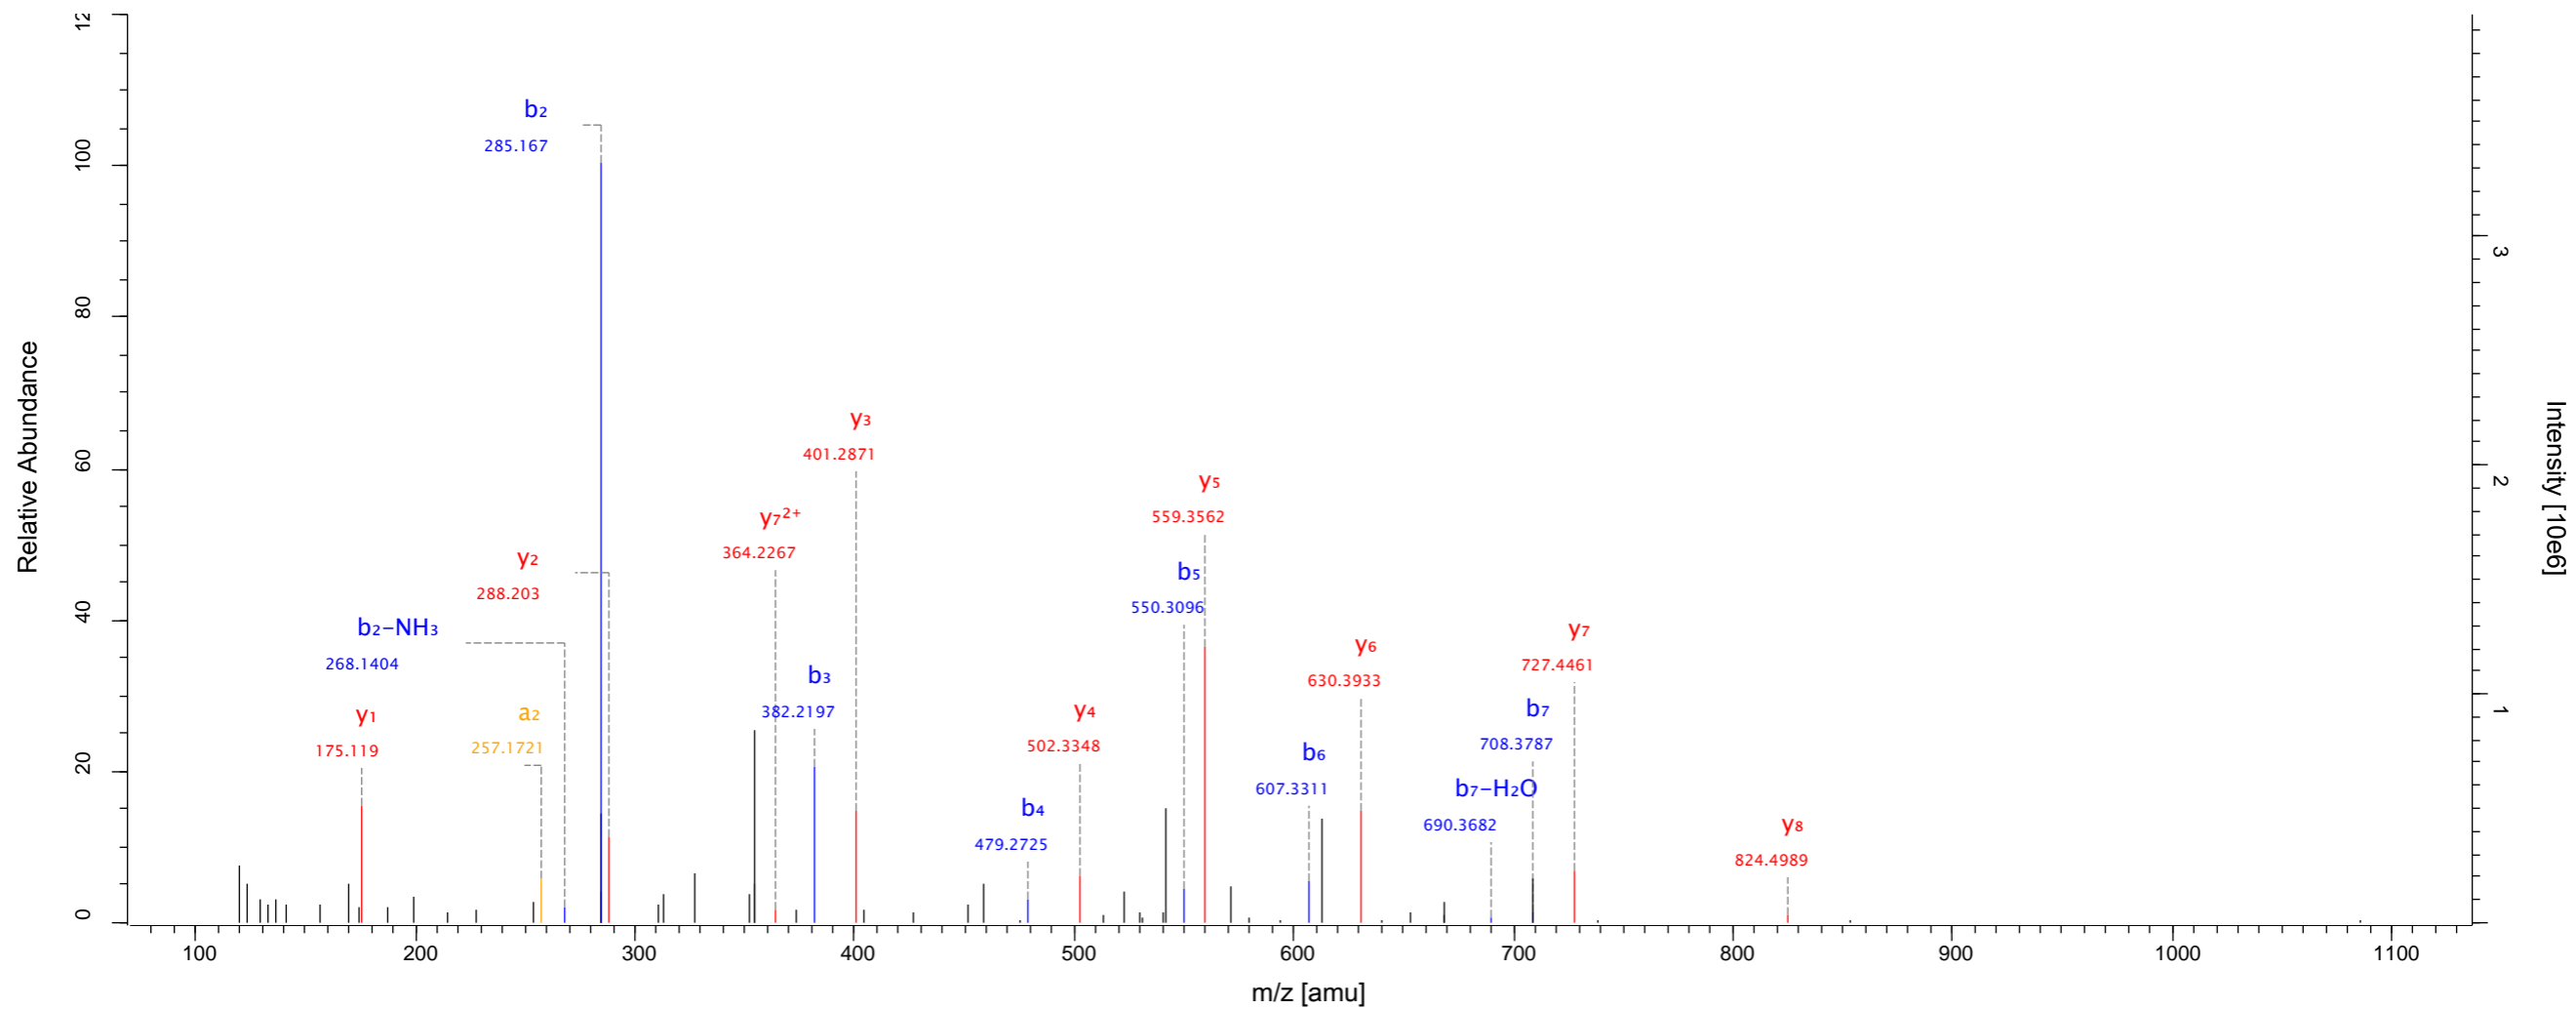



Raw file: 20111212\_EXQ5\_AnMi\_QC\_HCMVp11\_34  
 Scan number: 47161  
 Protein: ORFL73C - NC\_006273.2[30581,30946]- <unknown description>  
 Peptide score: 158.81  
 Method: FTMS; HCD

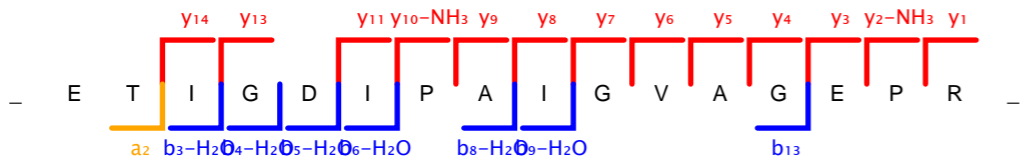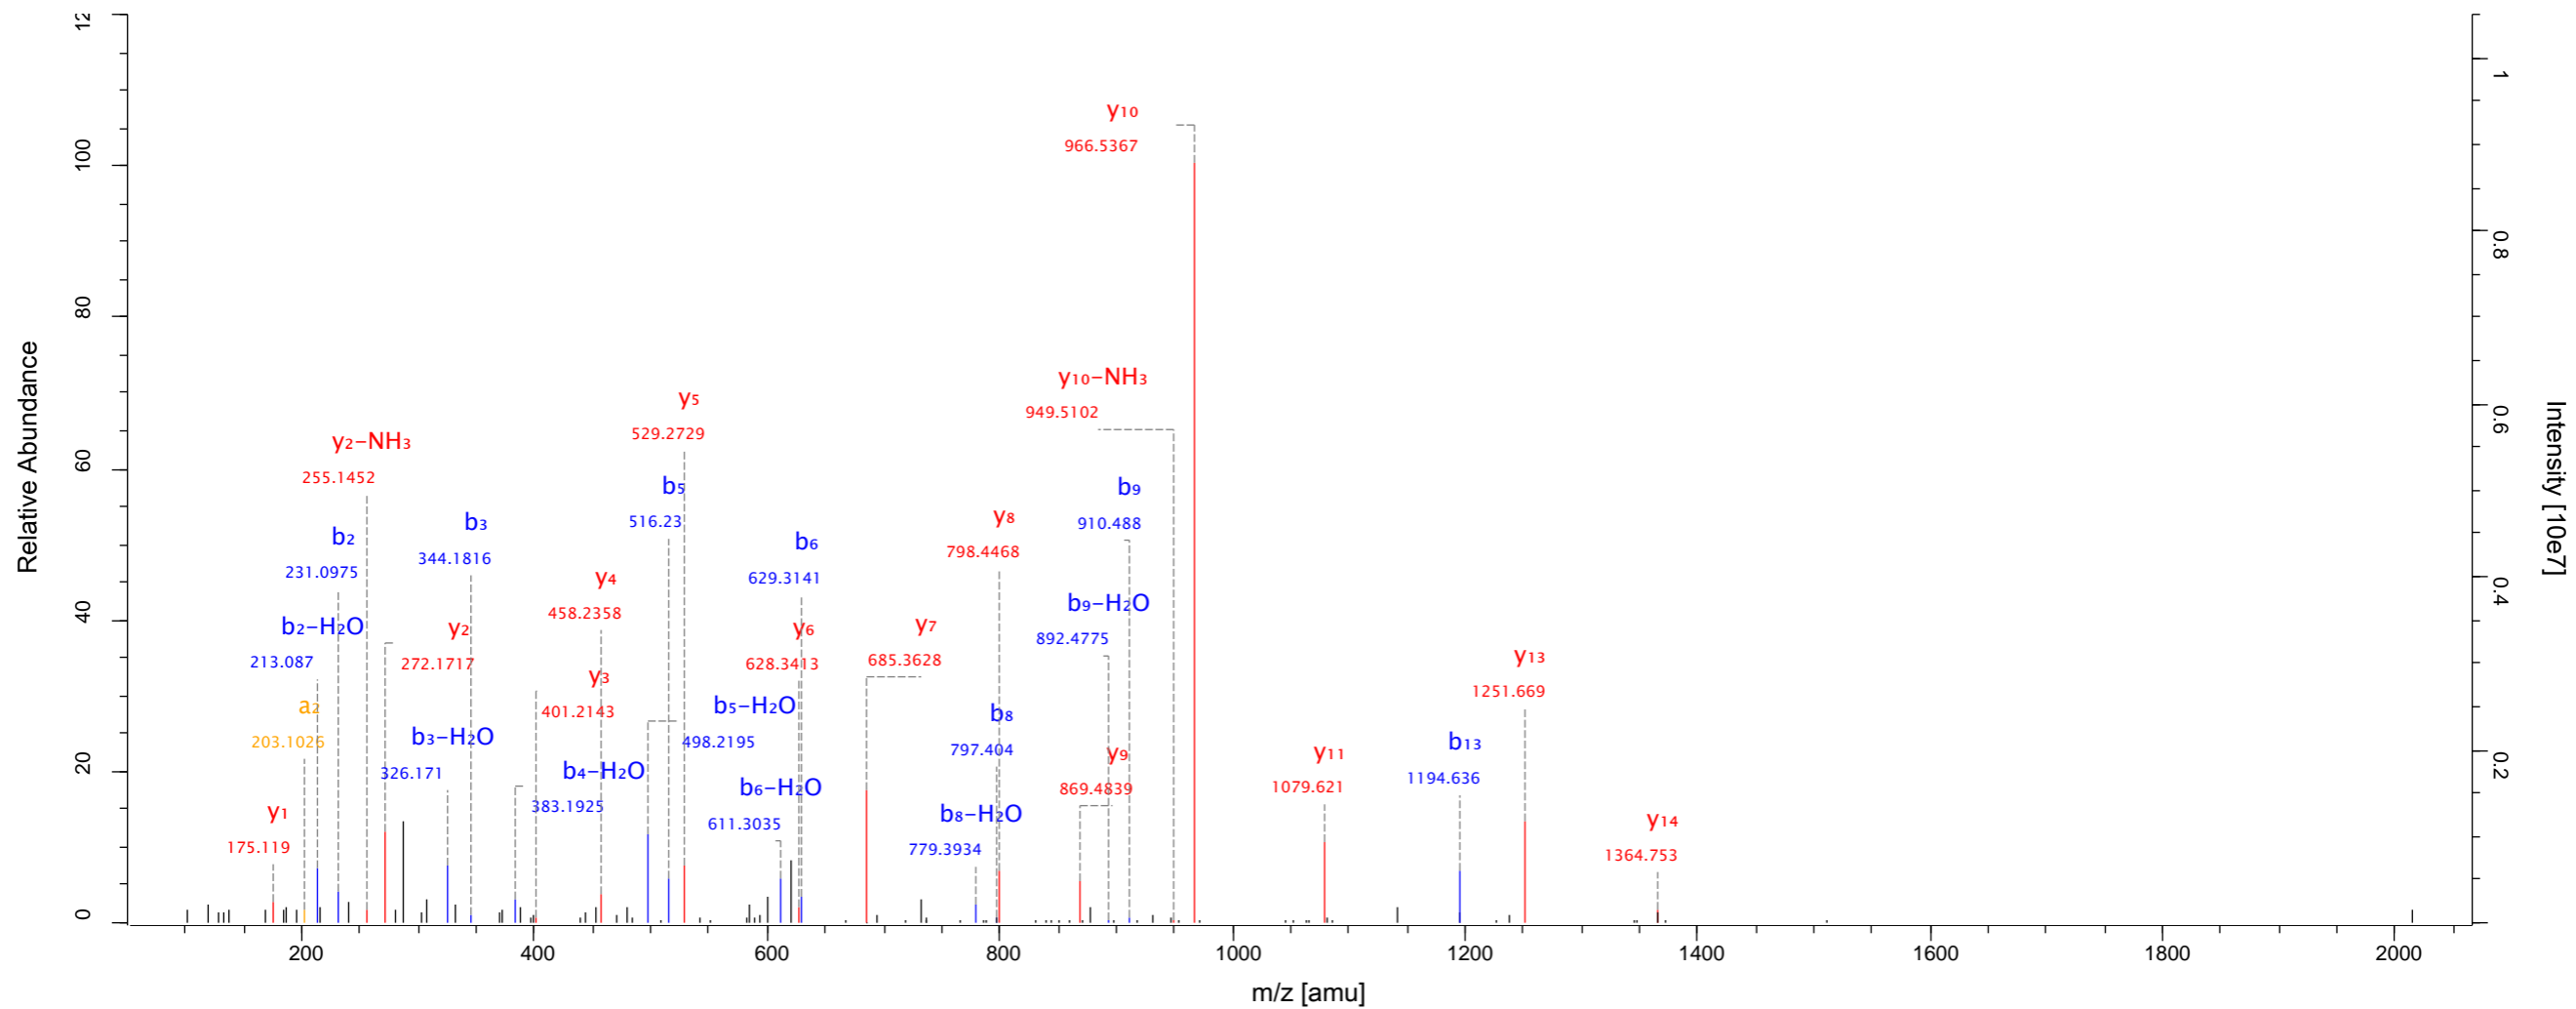

Raw file: 20111212\_EXQ5\_AnMi\_QC\_HCMVp1\_34  
Scan number: 47216  
Protein: ORFL206W + NC\_006273.2[122632,122880]+ <unknown description>  
Peptide score: 99.14  
Method: FTMS; HCD

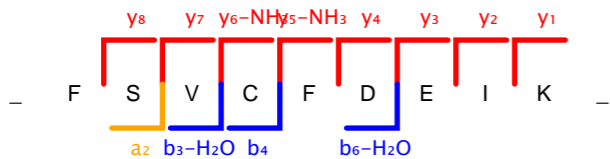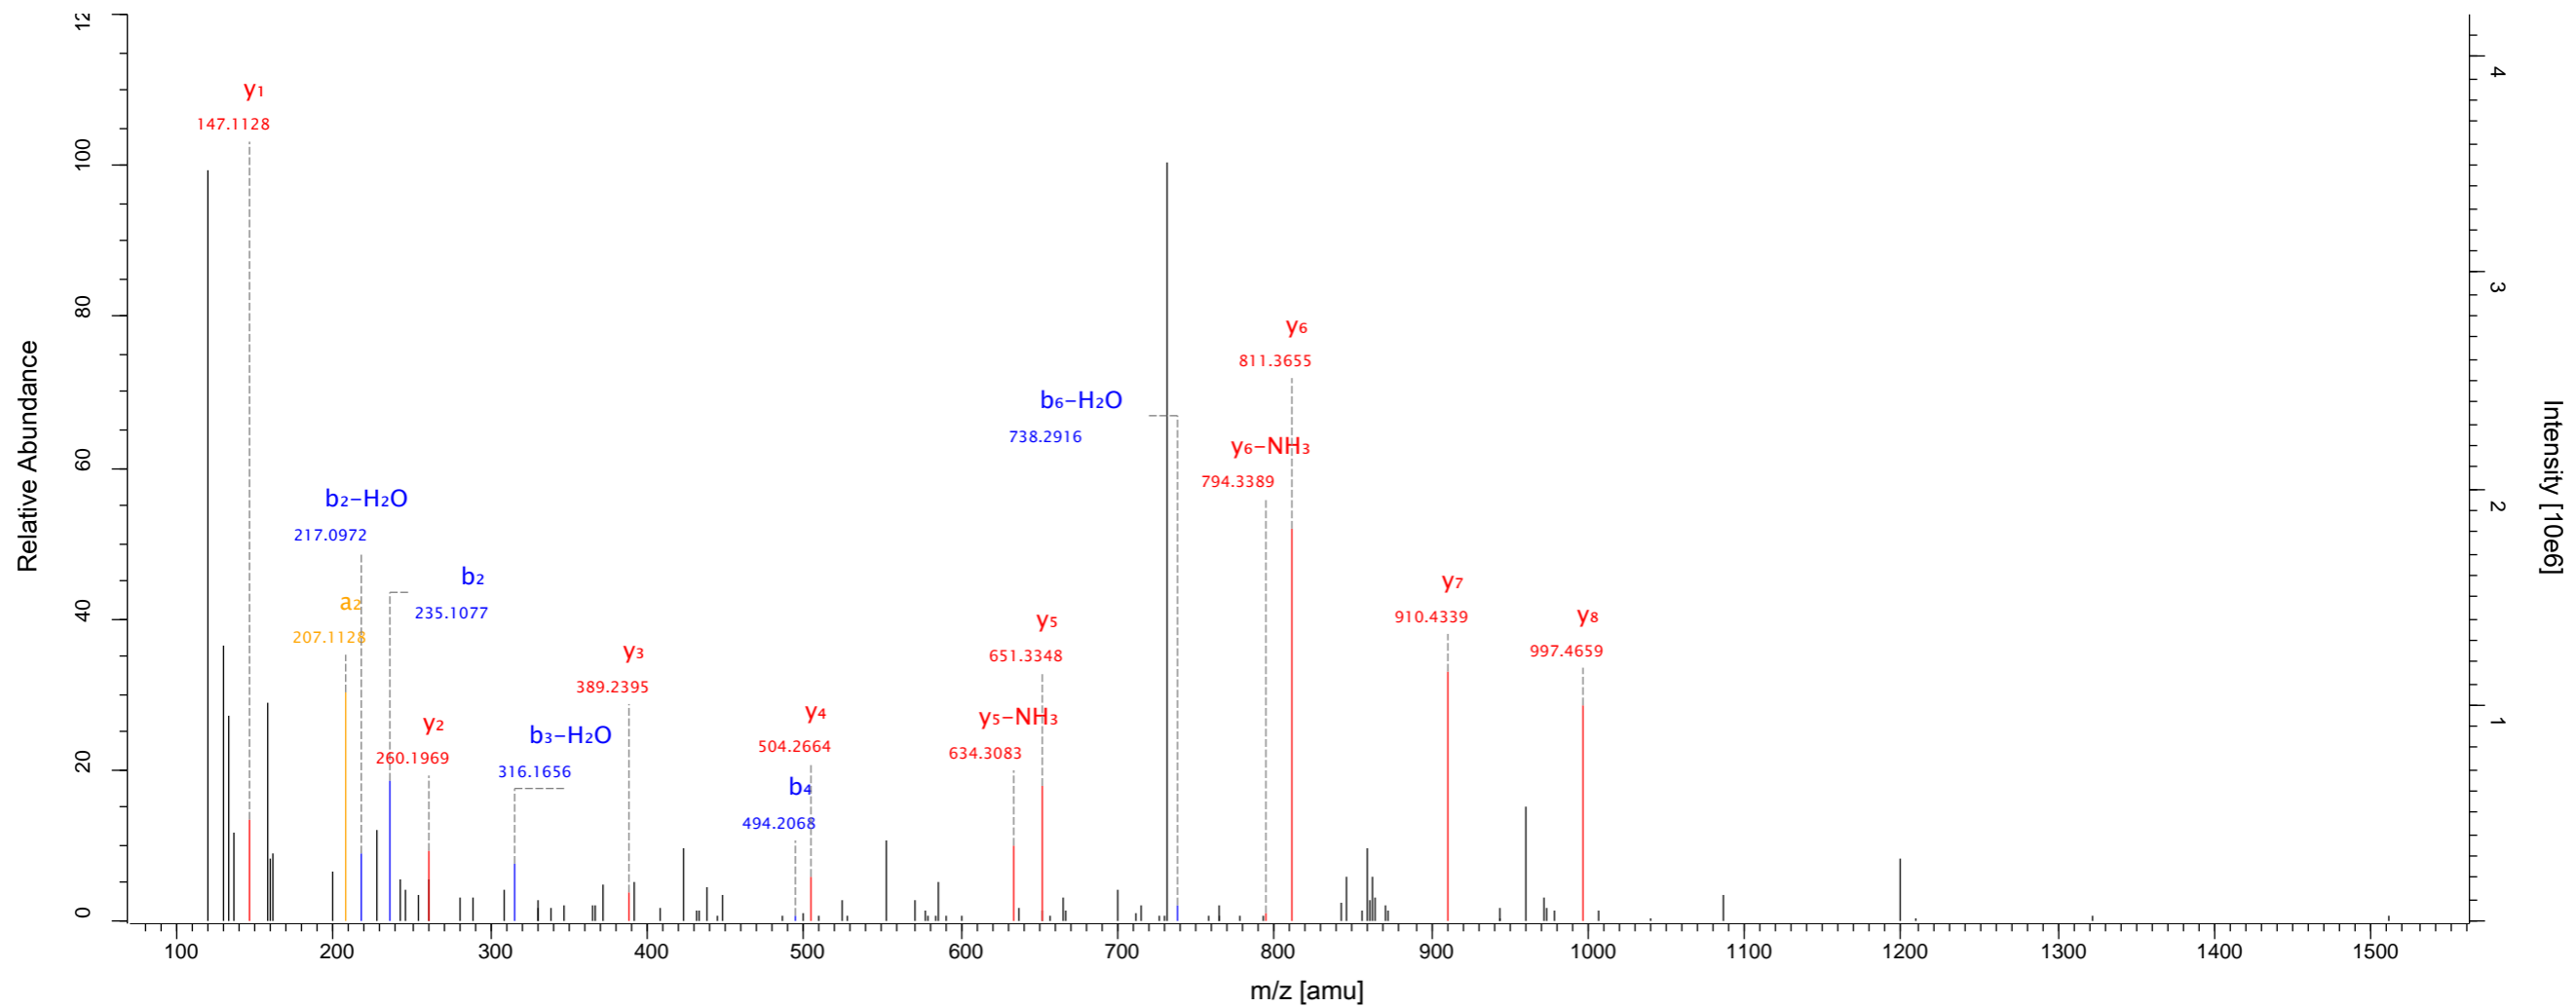

Raw file: 20111212\_EXQ5\_AnMi\_QC\_HCMVp1\_34  
 Scan number: 47720  
 Protein: ORFL253W.IORF3 + NC\_006273.2[162059,162286]+ <unknown description>  
 Peptide score: 98.68  
 Method: FTMS; HCD

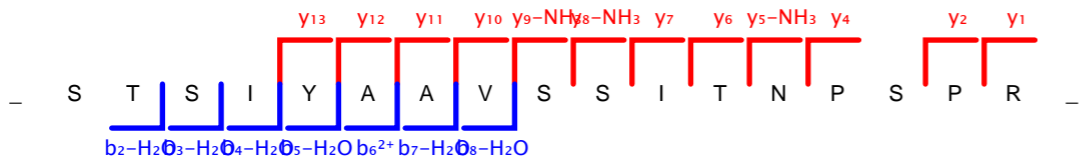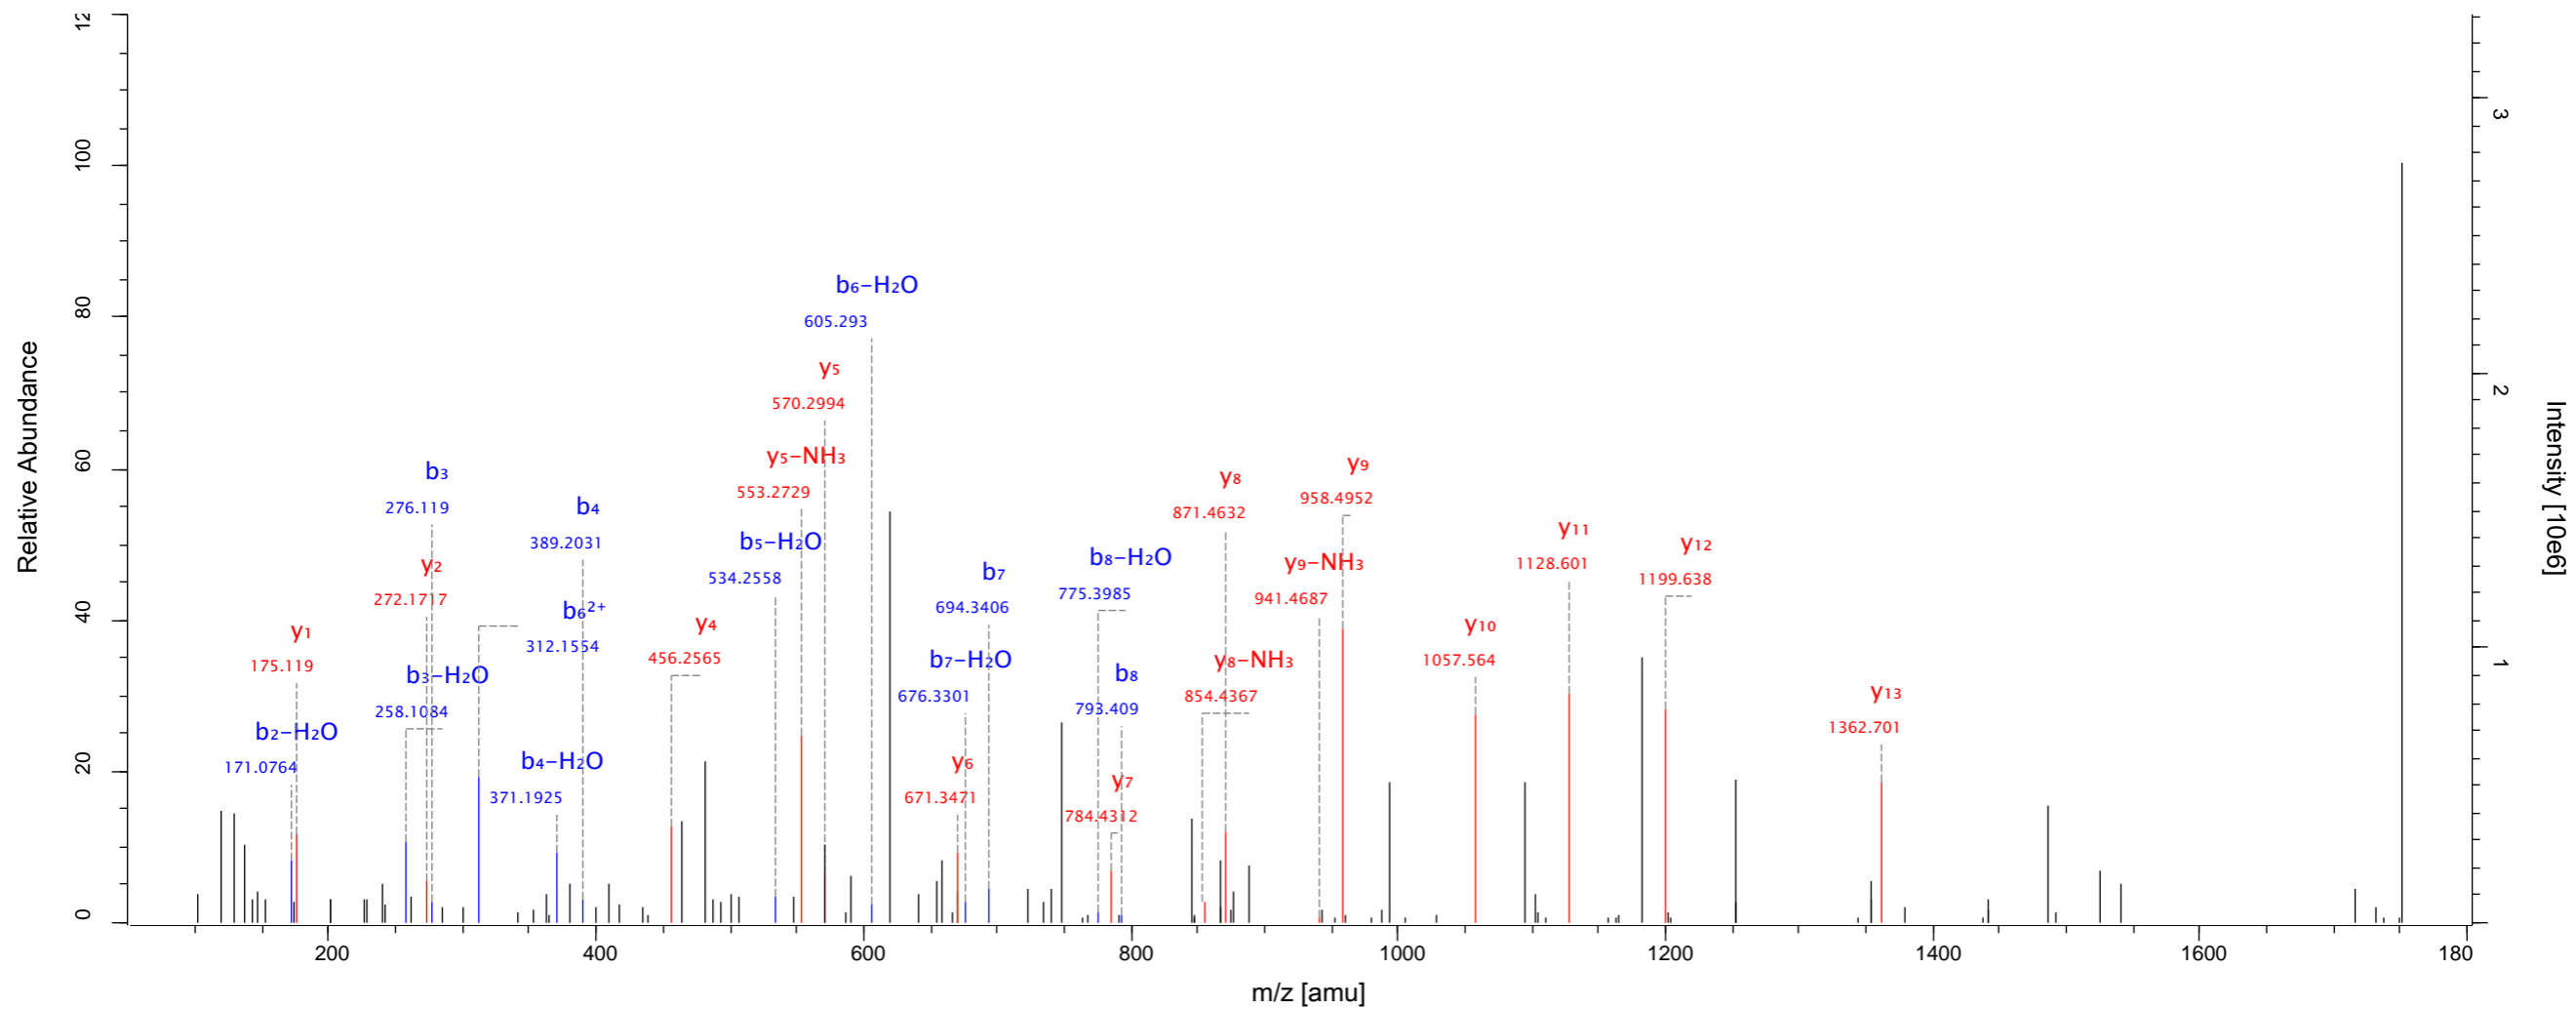

Raw file: 20111212\_EXQ5\_AnMi\_QC\_HCMVp11\_34  
Scan number: 47722  
Protein: ORFL211W + NC\_006273.2[125859,126083]+ <unknown description>  
Peptide score: 190.78  
Method: FTMS; HCD

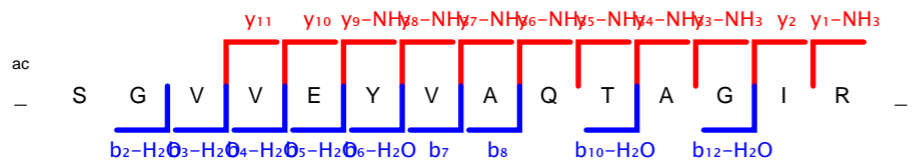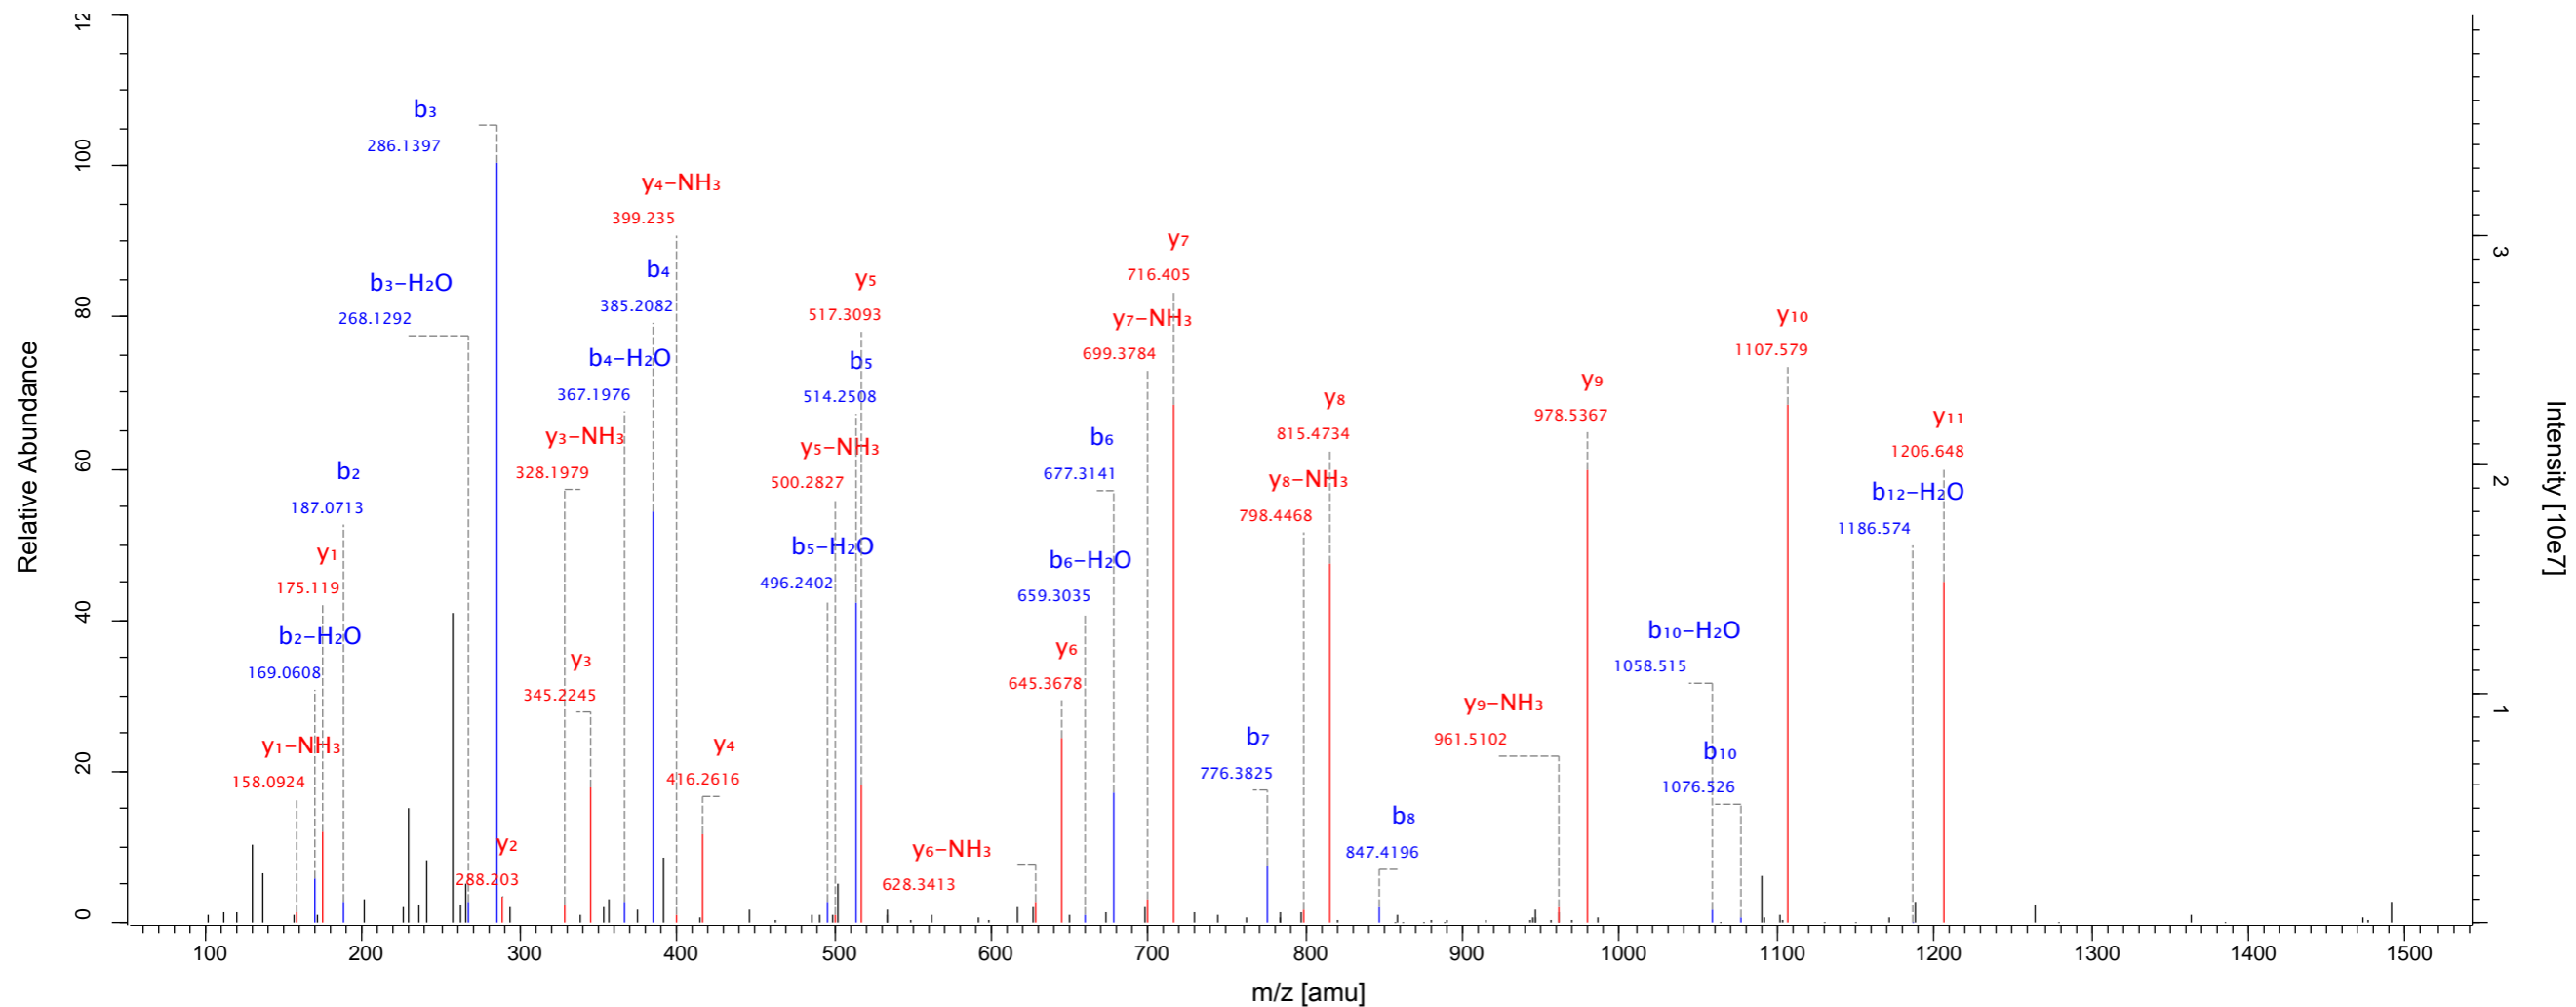

Raw file: 20111212\_EXQ5\_AnMi\_QC\_HCMVp1\_34  
Scan number: 48342  
Protein: ORFL211W + NC\_006273.2[125859,126083]+ <unknown description>  
Peptide score: 77.59  
Method: FTMS; HCD

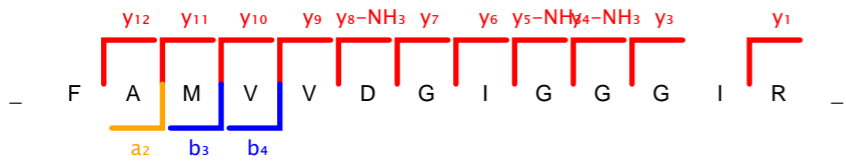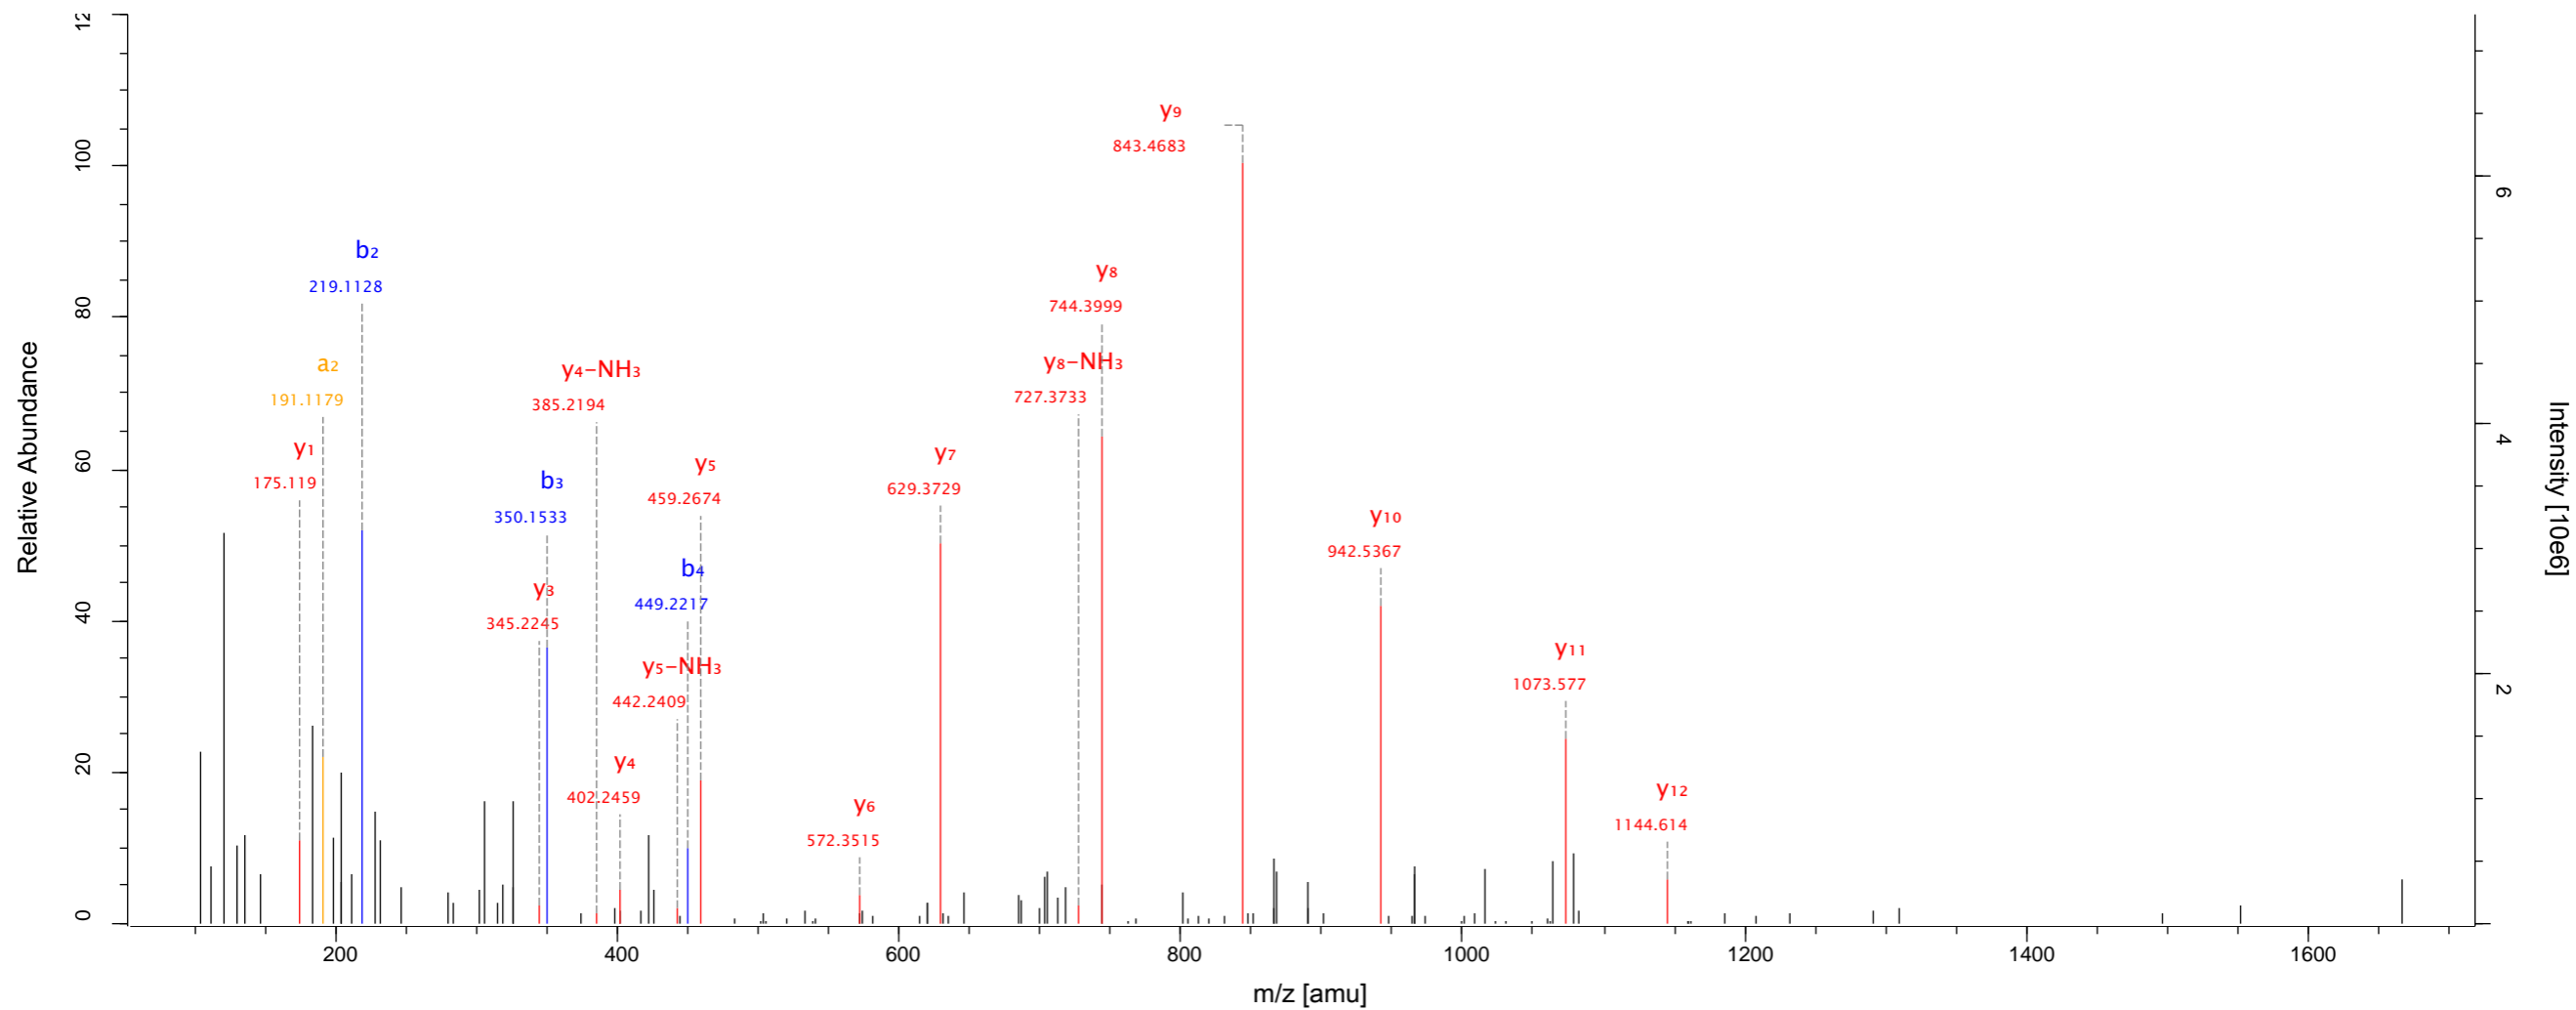

Raw file: 20111212\_EXQ5\_AnMi\_QC\_HCMVp1\_34  
 Scan number: 48586  
 Protein: ORFL174C.iORF1 - NC\_006273.2[106302,106568]- <unknown description>  
 Peptide score: 120.14  
 Method: FTMS; HCD

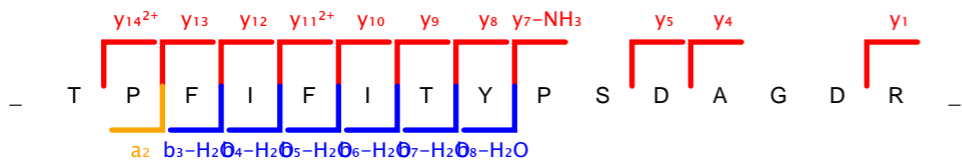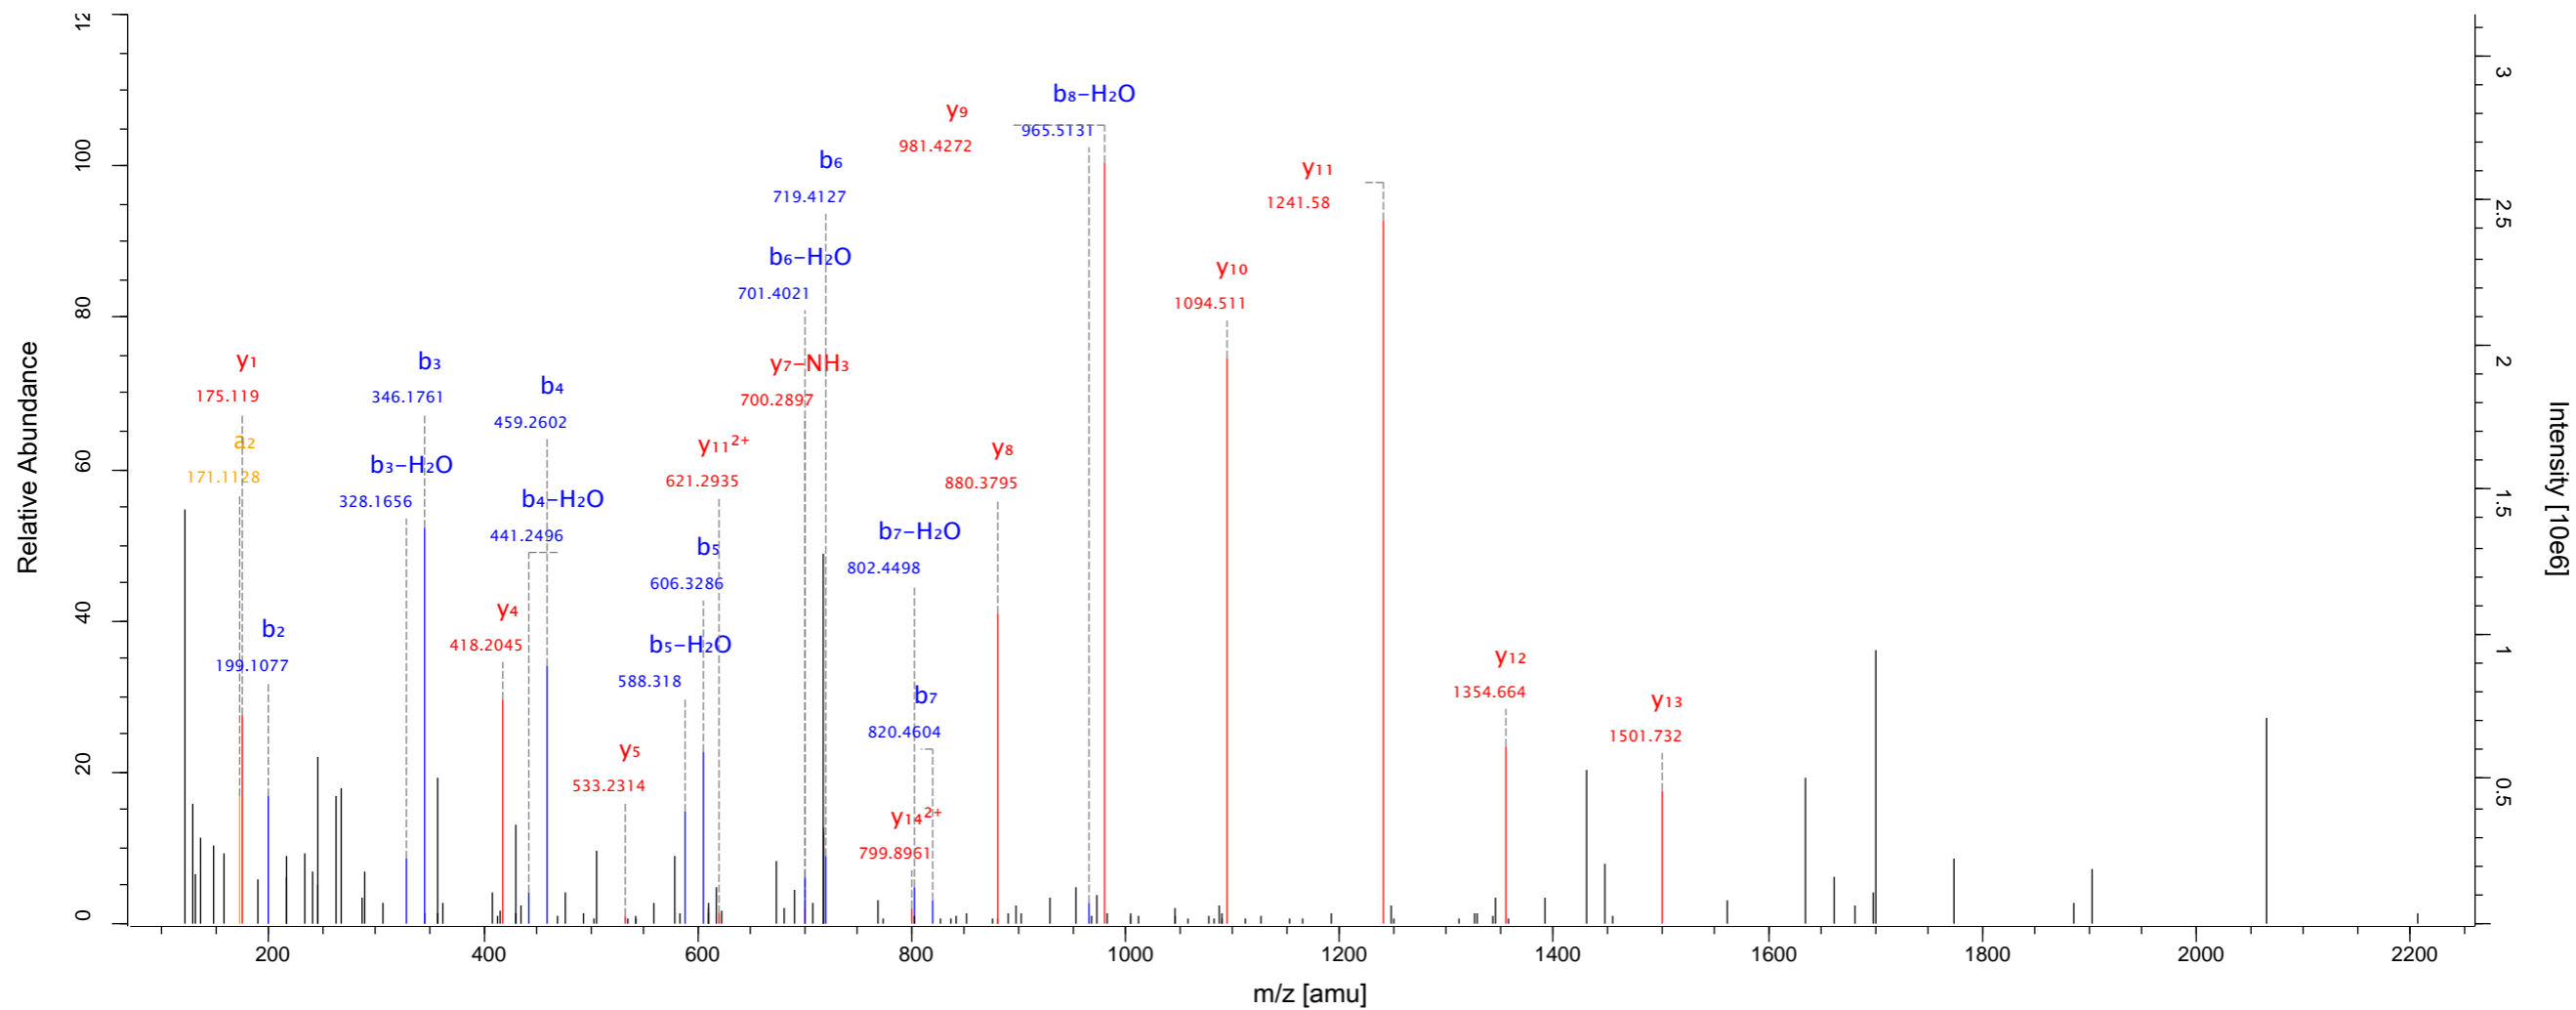

Raw file: 20111212\_EXQ5\_AnMi\_QC\_HCMVpl1\_34  
 Scan number: 6089  
 Protein: ORFL106C - NC\_006273.2[53935,54294]- <unknown description>  
 Peptide score: 91.58  
 Method: FTMS; HCD

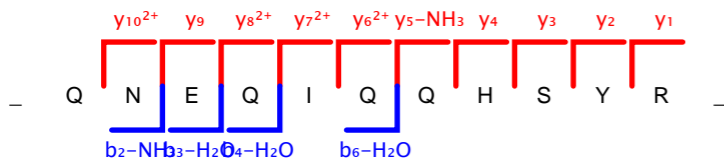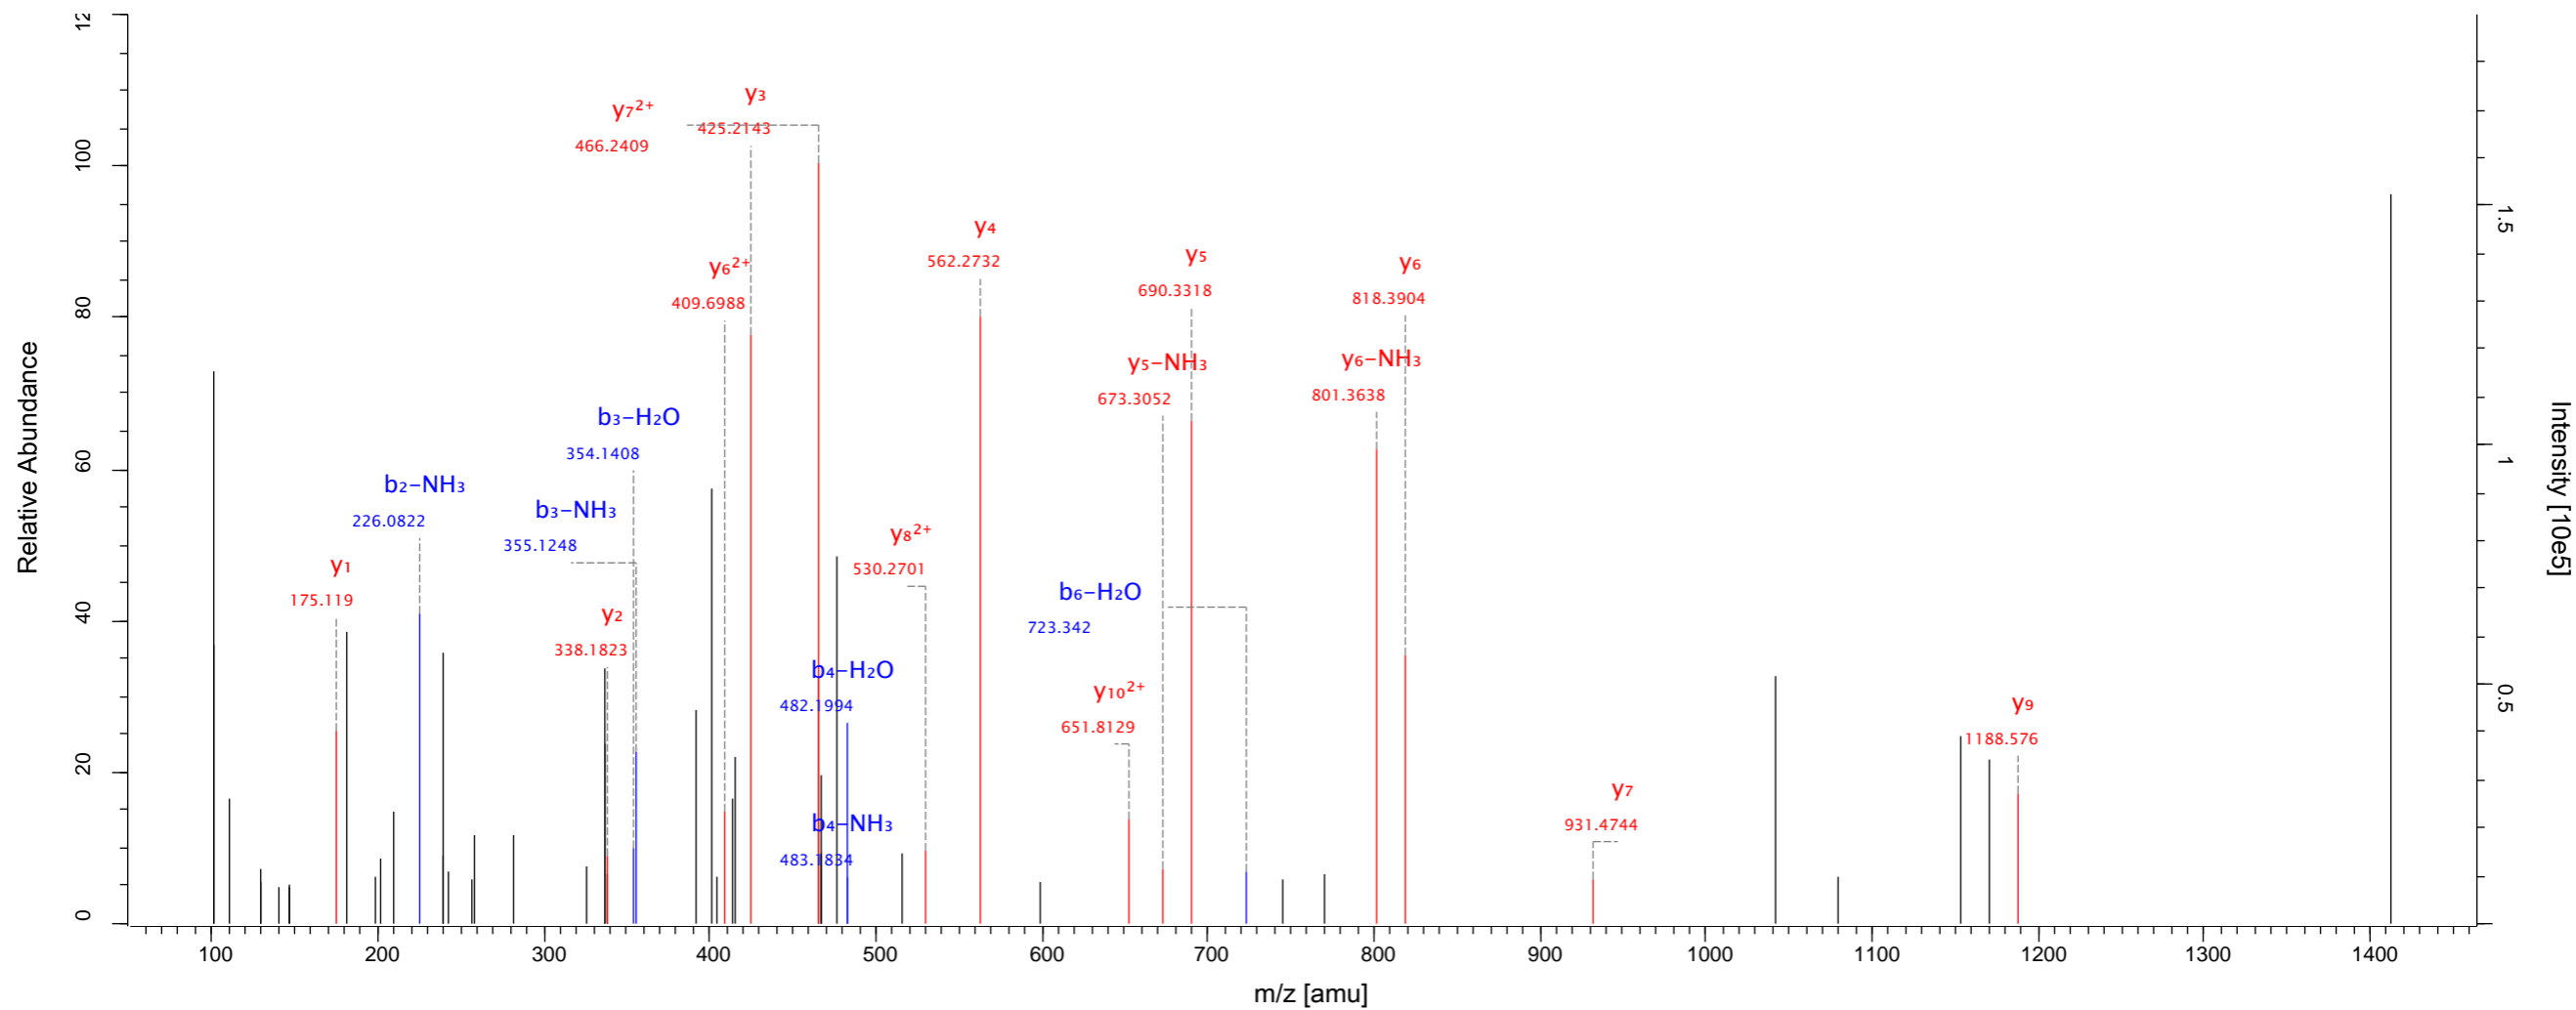

Raw file: 20111212\_EXQ5\_AnMi\_QC\_HCMVp11\_34  
Scan number: 8955  
Protein: ORFL73C - NC\_006273.2[30581,30946]- <unknown description>  
Peptide score: 74.92  
Method: FTMS; HCD

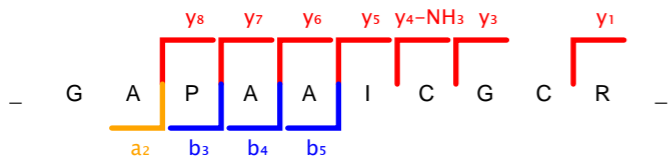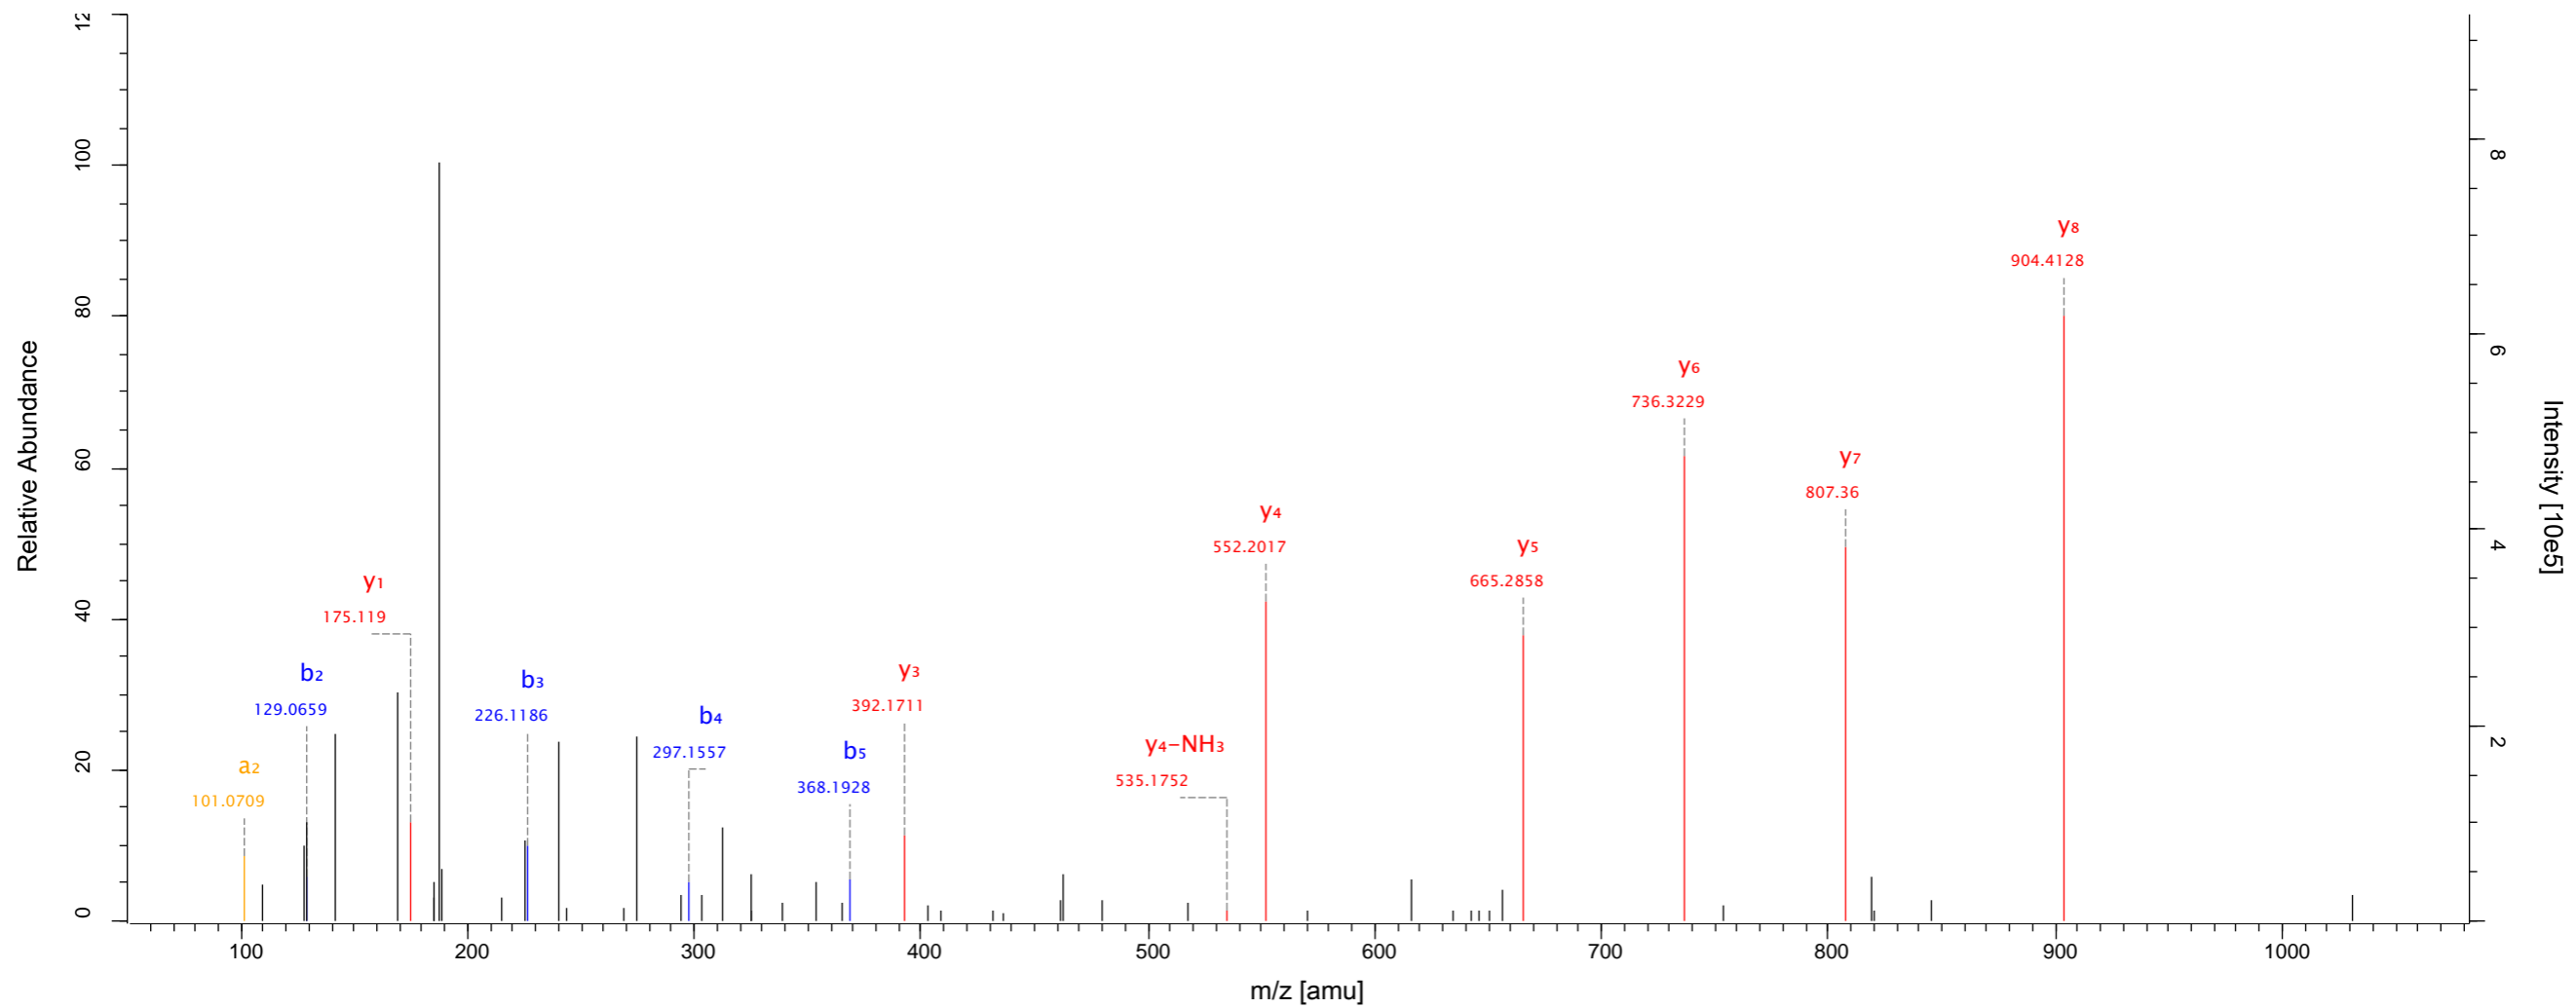



Raw file: 20111212\_EXQ5\_AnMi\_QC\_HCMVp1\_35  
Scan number: 10146  
Protein: ORFL224C.iORF1 - NC\_006273.2[134354,134734]- <unknown description>  
Peptide score: 74.68  
Method: FTMS; HCD

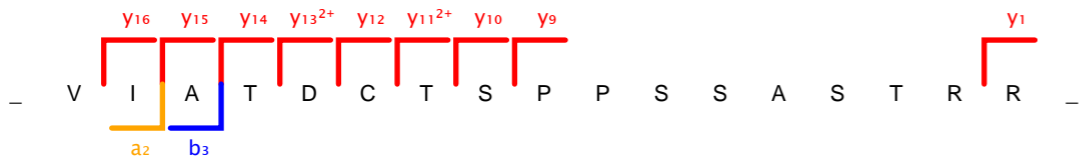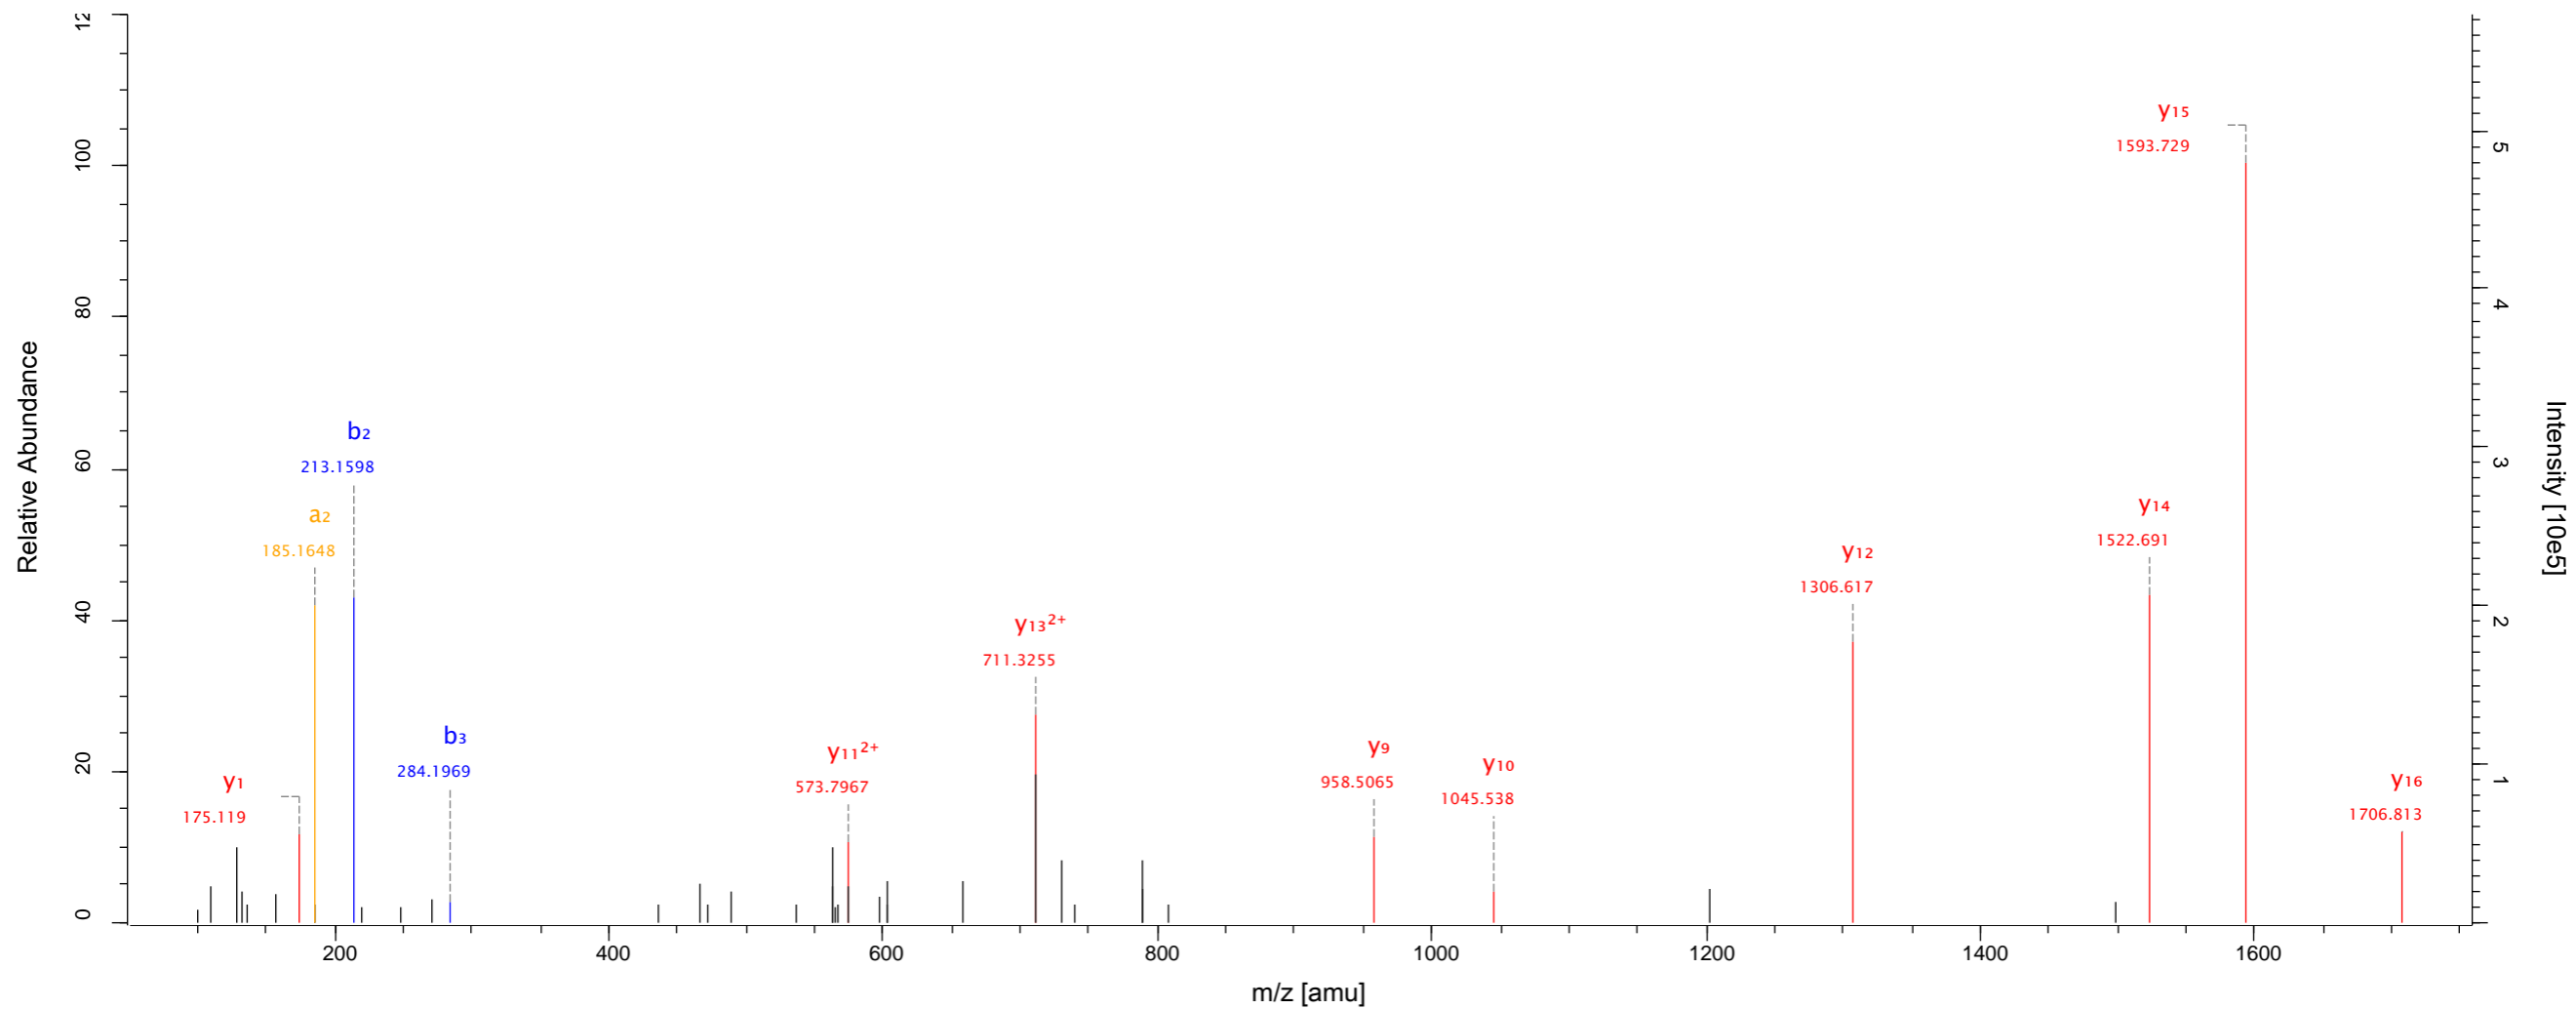

Raw file: 20111212\_EXQ5\_AnMi\_QC\_HCMVp1\_35  
 Scan number: 10767  
 Protein: ORFL224C.iORF1 - NC\_006273.2[134354,134734]- <unknown description>  
 Peptide score: 75.45  
 Method: FTMS; HCD

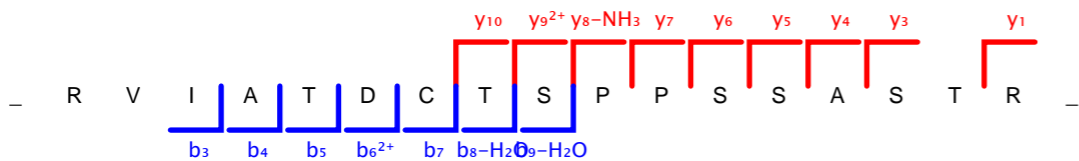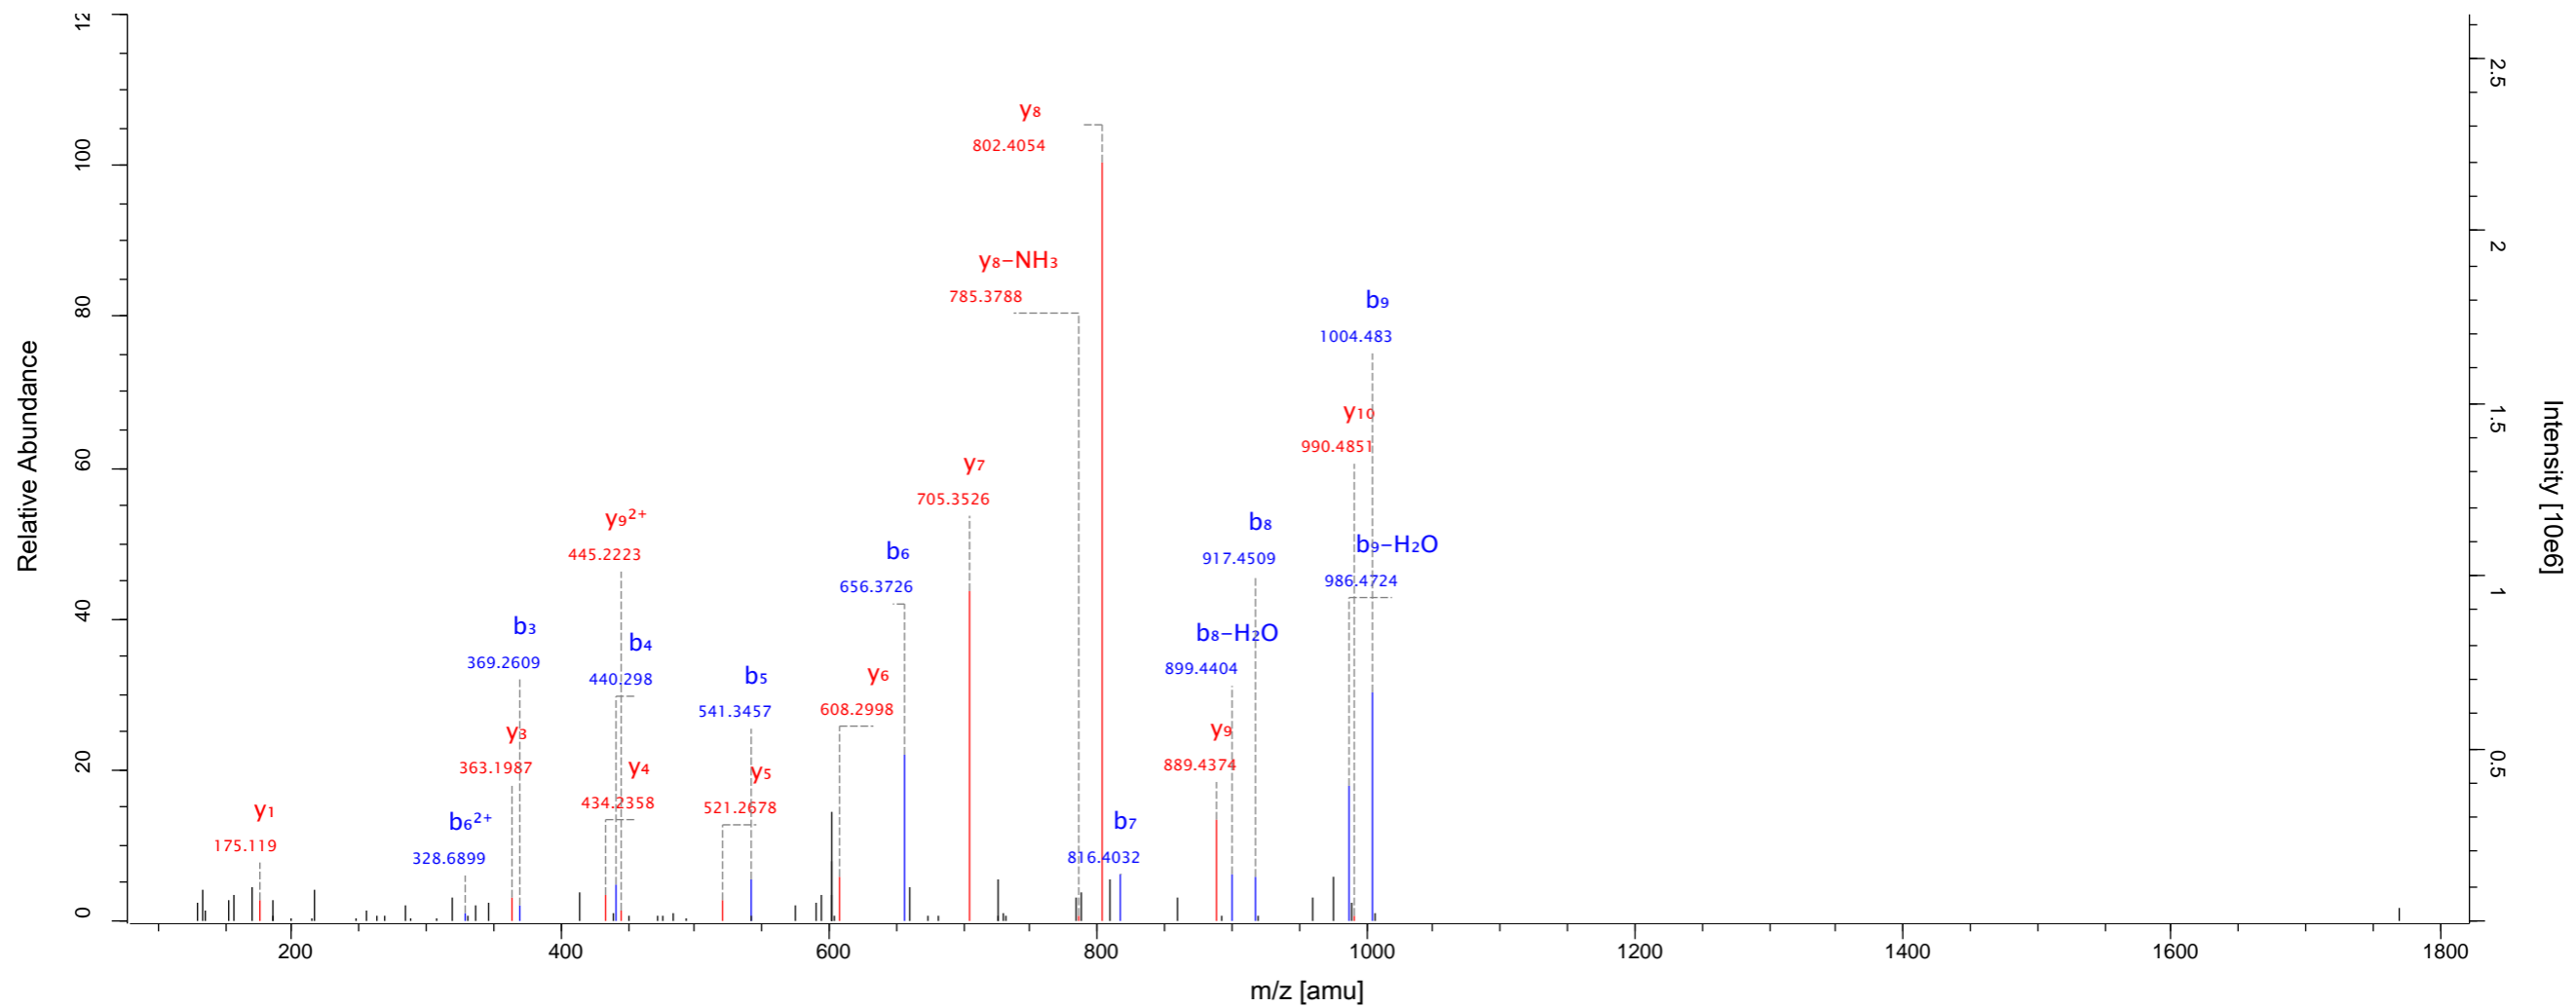

Raw file: 20111212\_EXQ5\_AnMi\_QC\_HCMVp1\_35  
 Scan number: 11021  
 Protein: ORFL119C - NC\_006273.2[63363,63800]- <unknown description>  
 Peptide score: 165.18  
 Method: FTMS; HCD

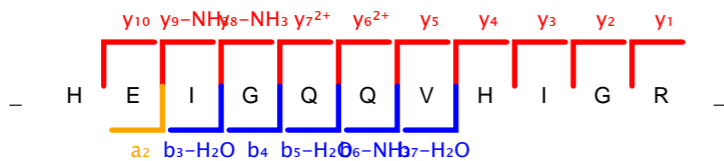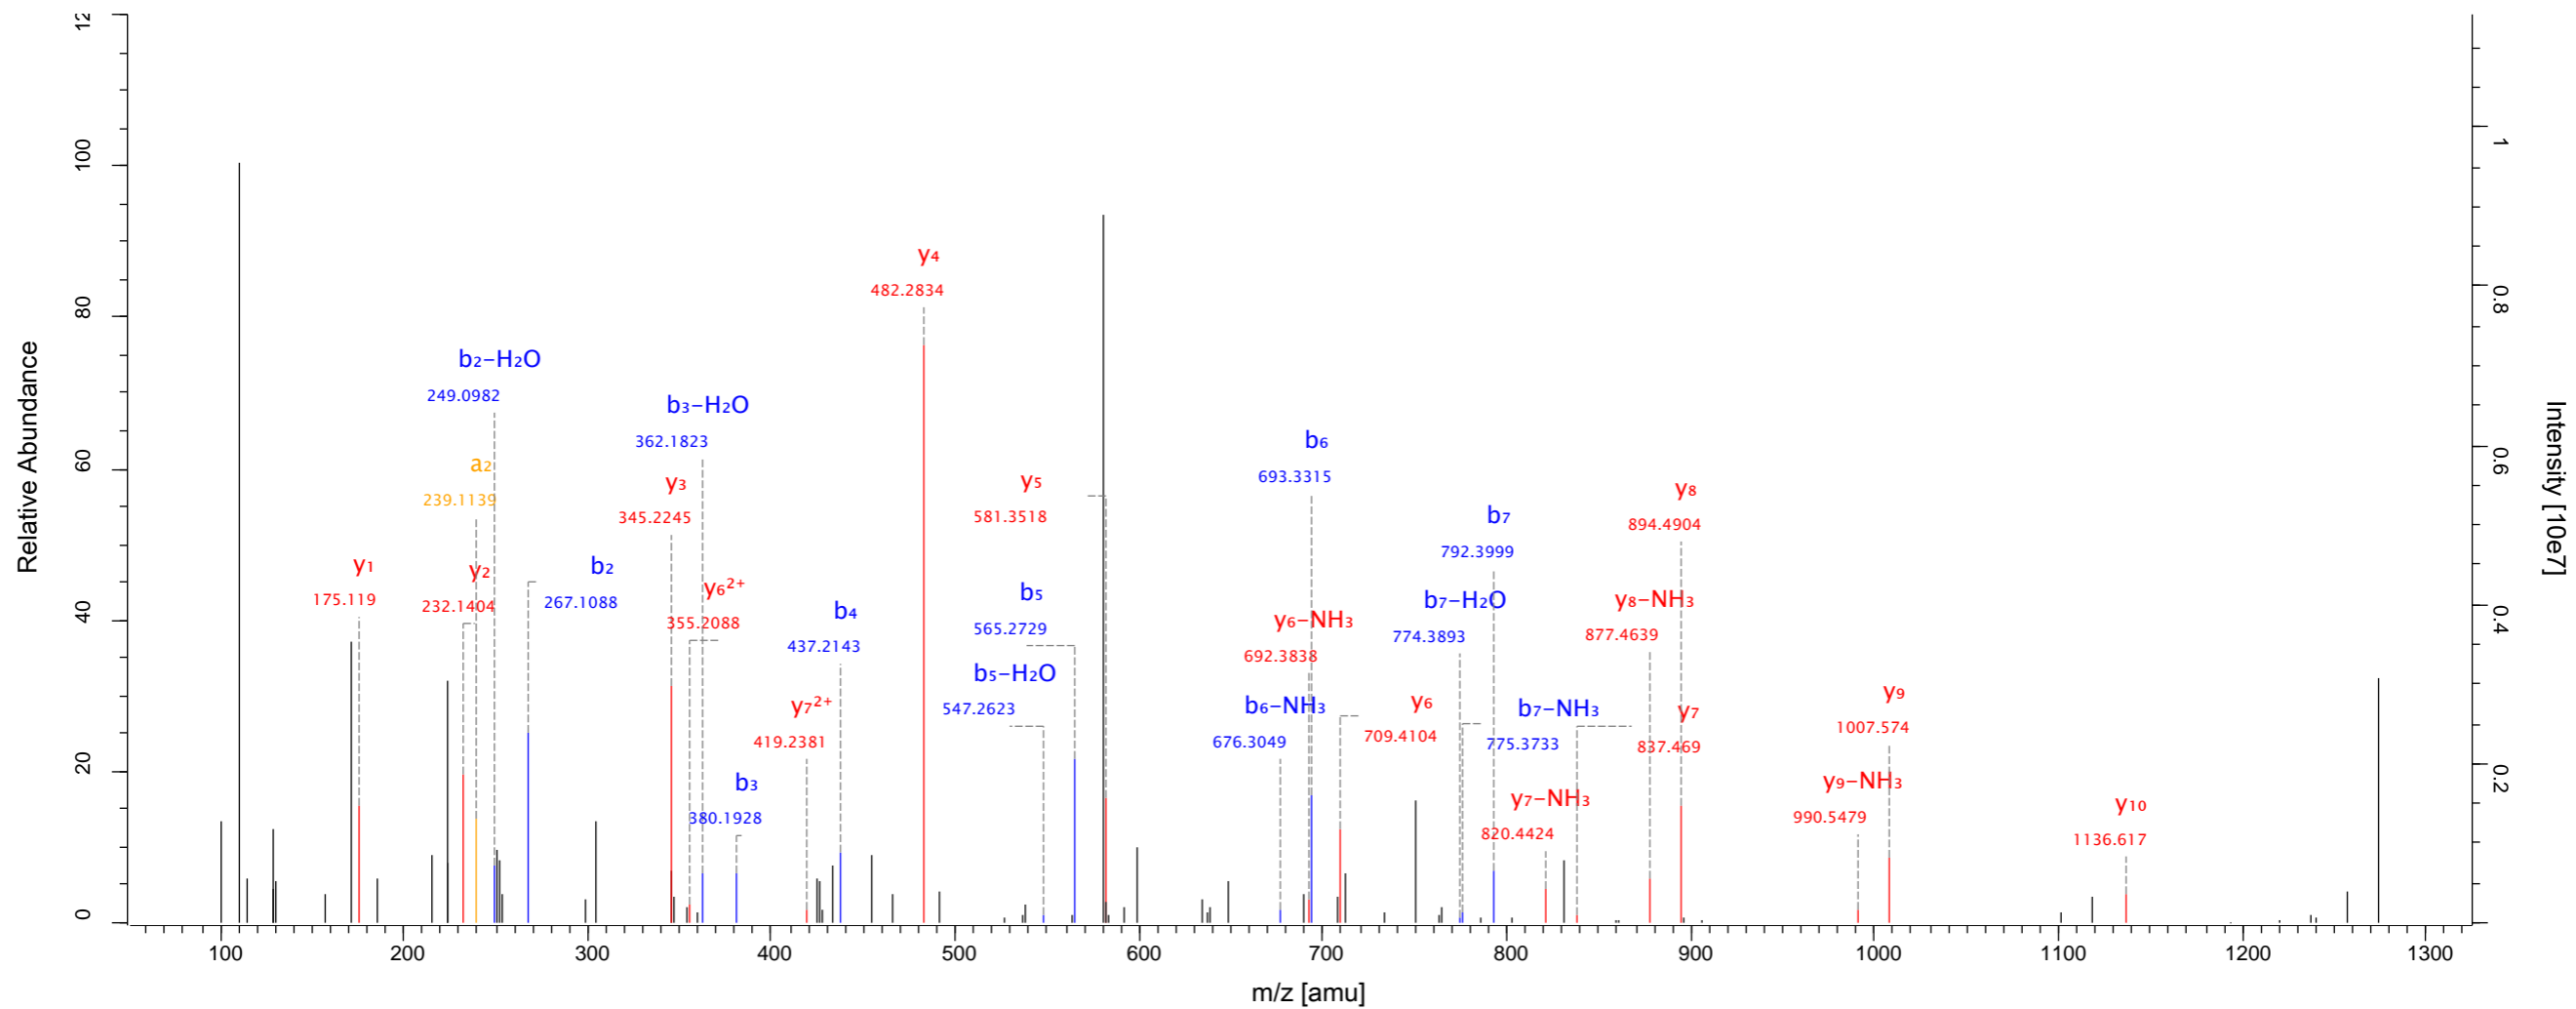

Raw file: 20111212\_EXQ5\_AnMi\_QC\_HCMVp11\_35  
 Scan number: 12108  
 Protein: ORFL119C - NC\_006273.2[63363,63800]- <unknown description>  
 Peptide score: 117.81  
 Method: FTMS; HCD

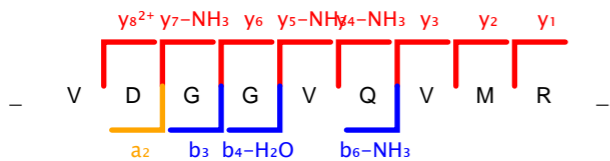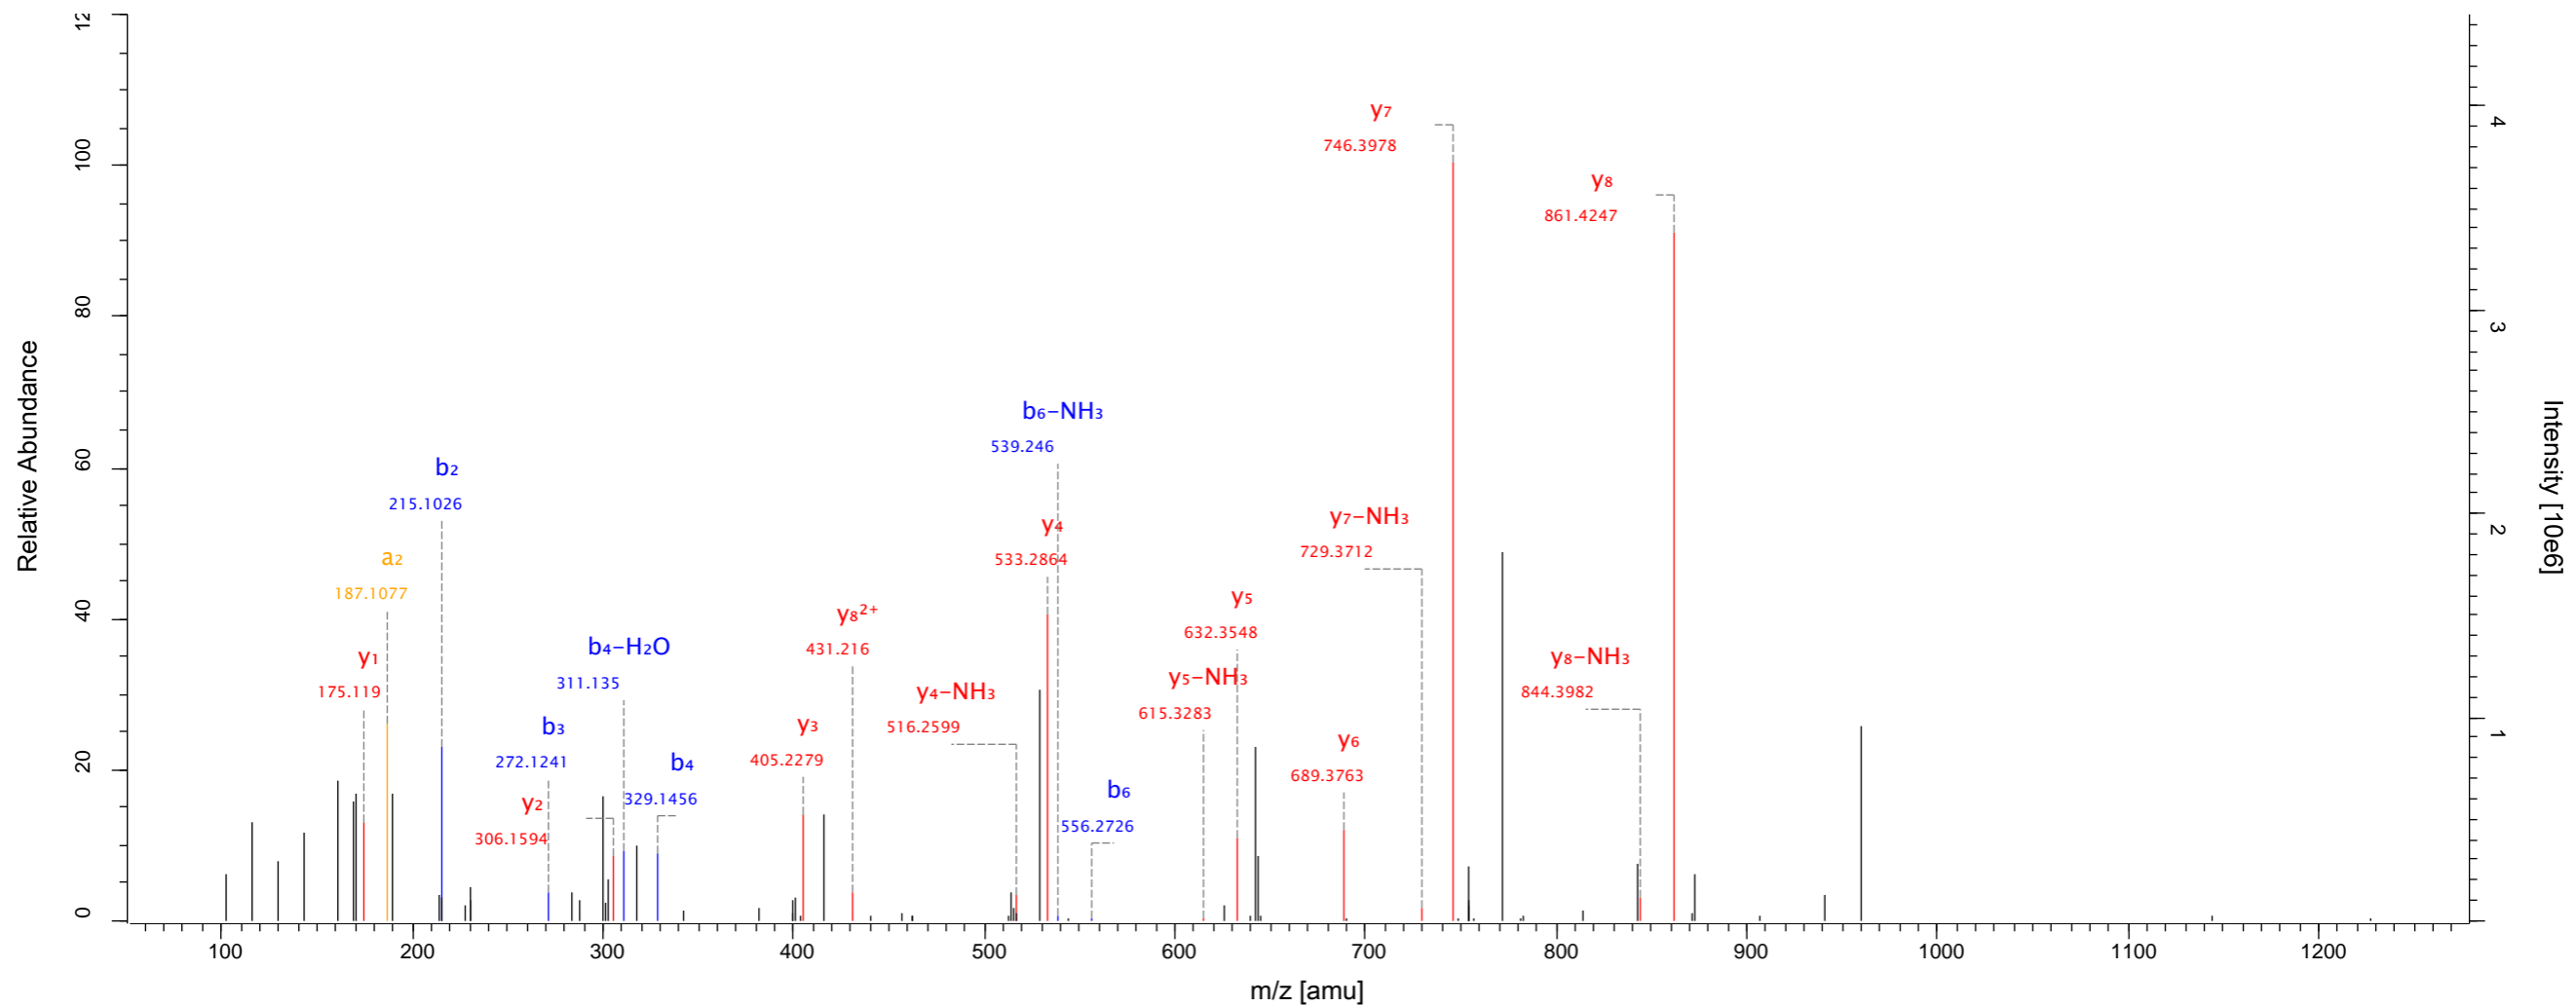

Raw file: 20111212\_EXQ5\_AnMi\_QC\_HCMVp1\_35  
Scan number: 14501  
Protein: ORFL174C.iORF2 - NC\_006273.2[106396,106770]- <unknown description>  
Peptide score: 56.56  
Method: FTMS; HCD

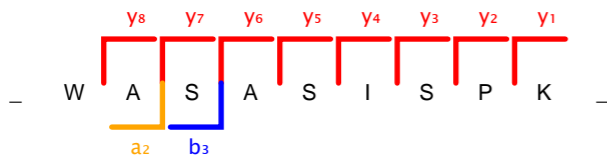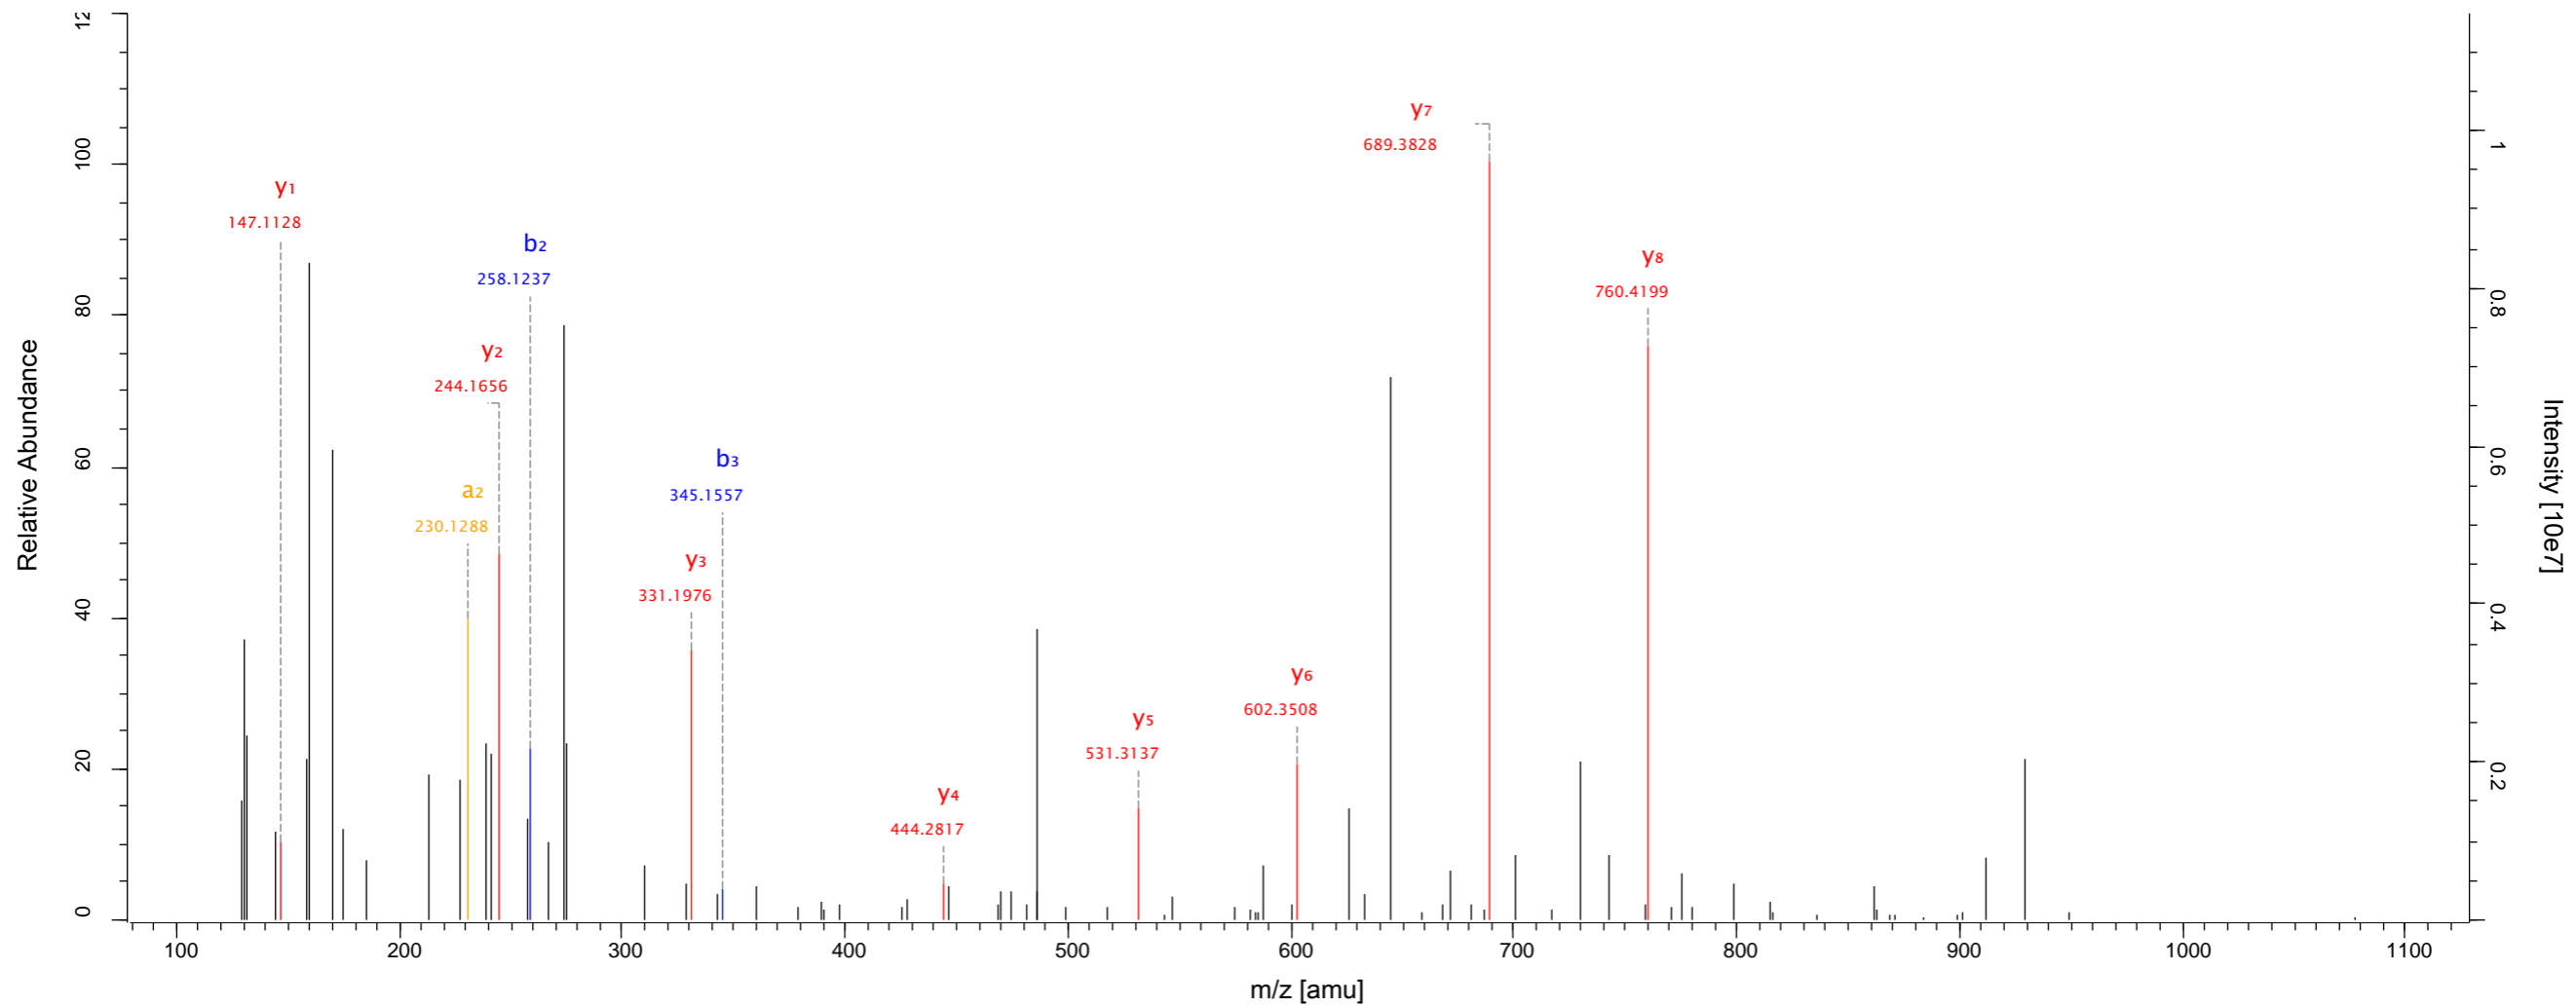

Raw file: 20111212\_EXQ5\_AnMi\_QC\_HCMVp1\_35  
 Scan number: 18060  
 Protein: ORFL86W + NC\_006273.2[38059,38538]+ <unknown description>  
 Peptide score: 127.56  
 Method: FTMS; HCD

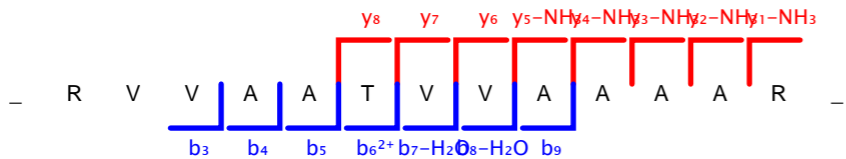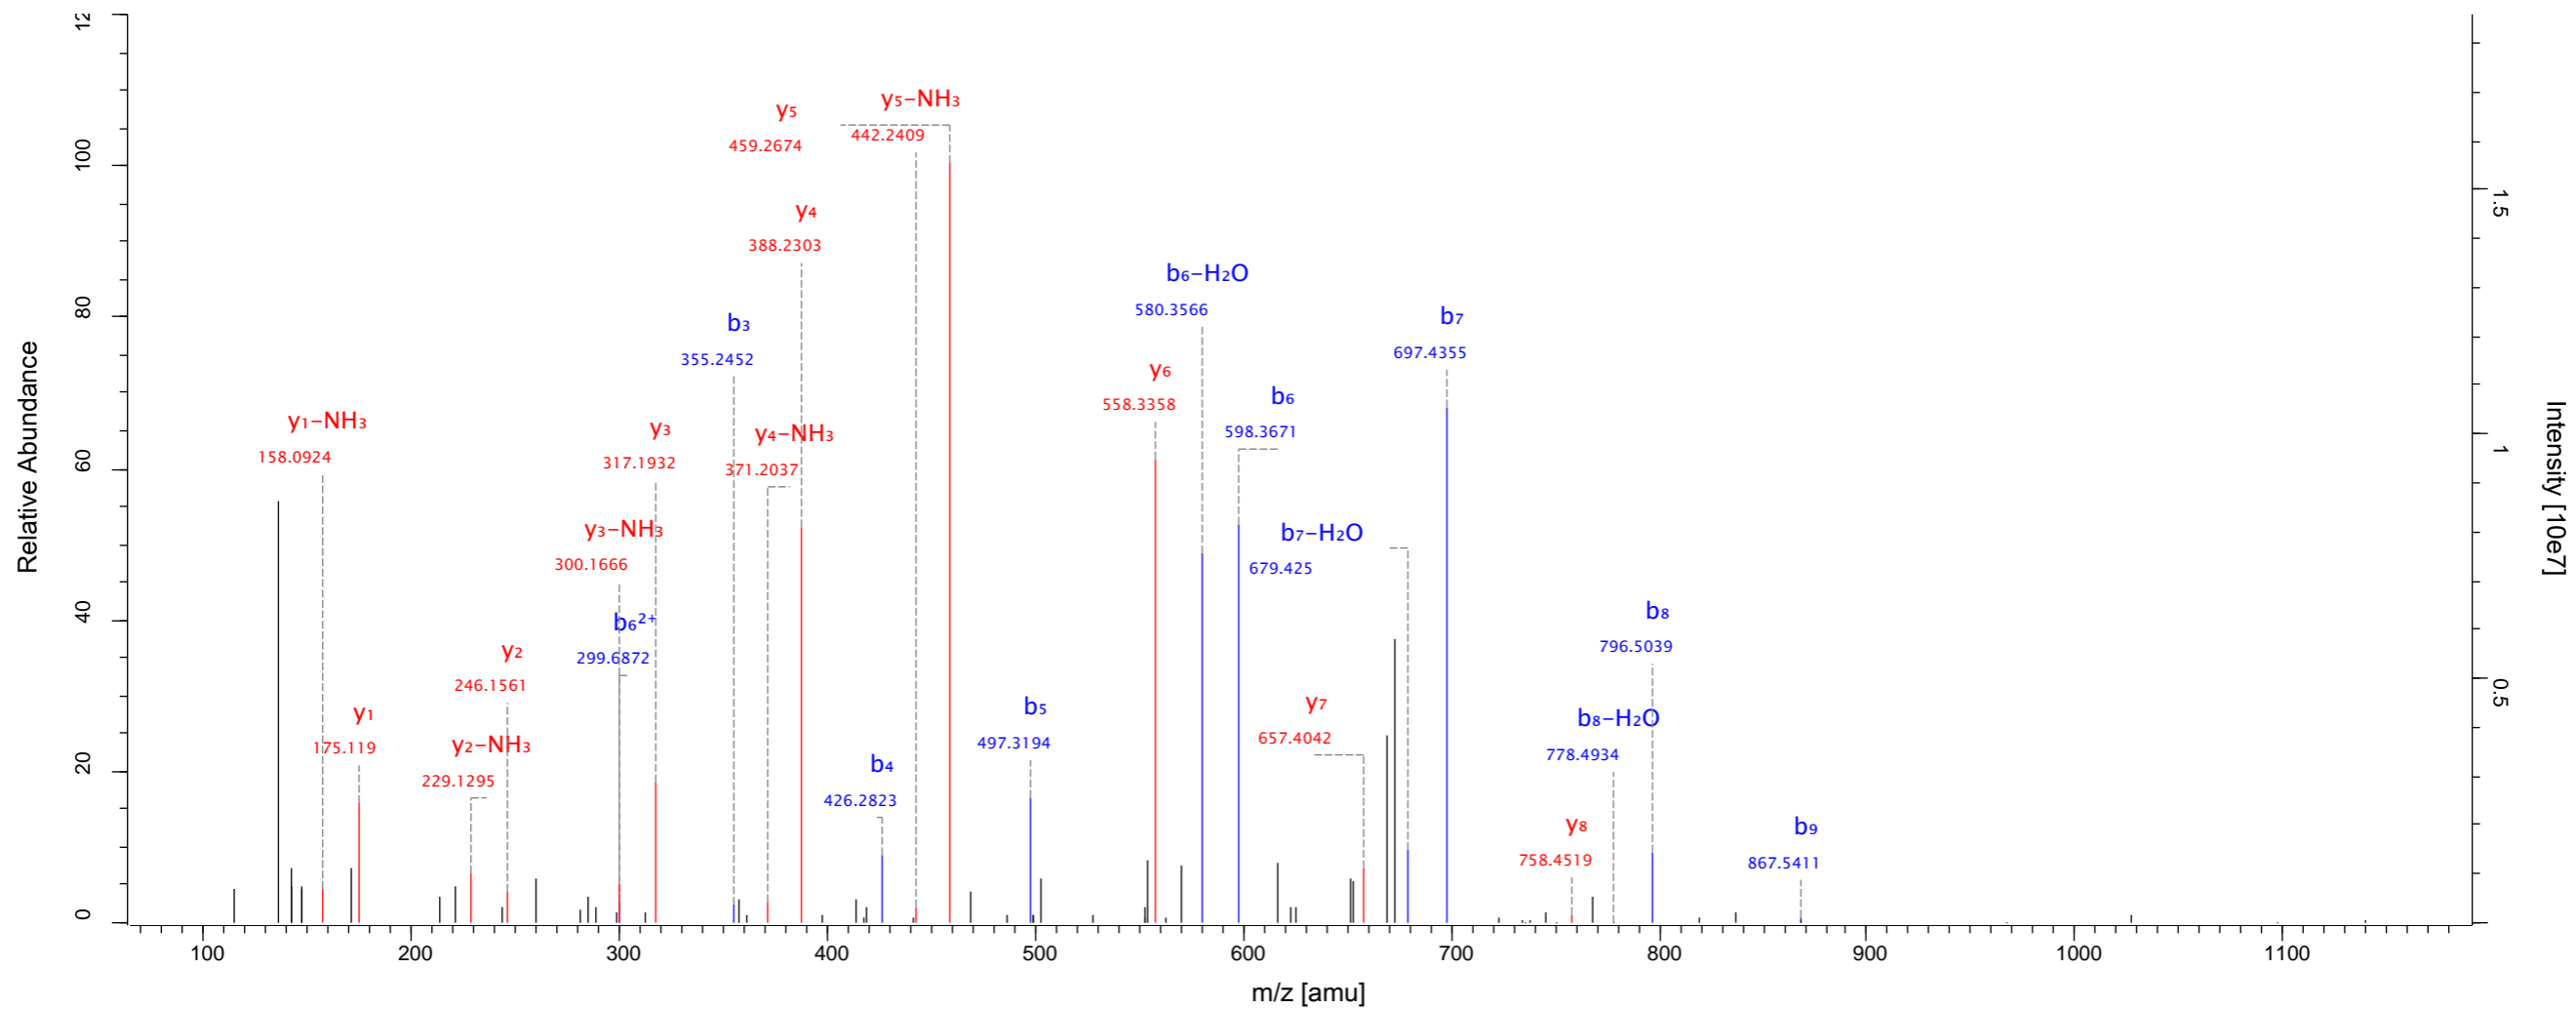

Raw file: 20111212\_EXQ5\_AnMi\_QC\_HCMVp1\_35  
 Scan number: 19430  
 Protein: ORFL174C.iORF2 - NC\_006273.2[106396,106770]- <unknown description>  
 Peptide score: 132.14  
 Method: FTMS; HCD

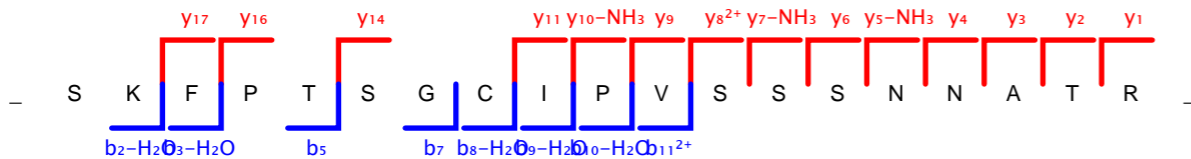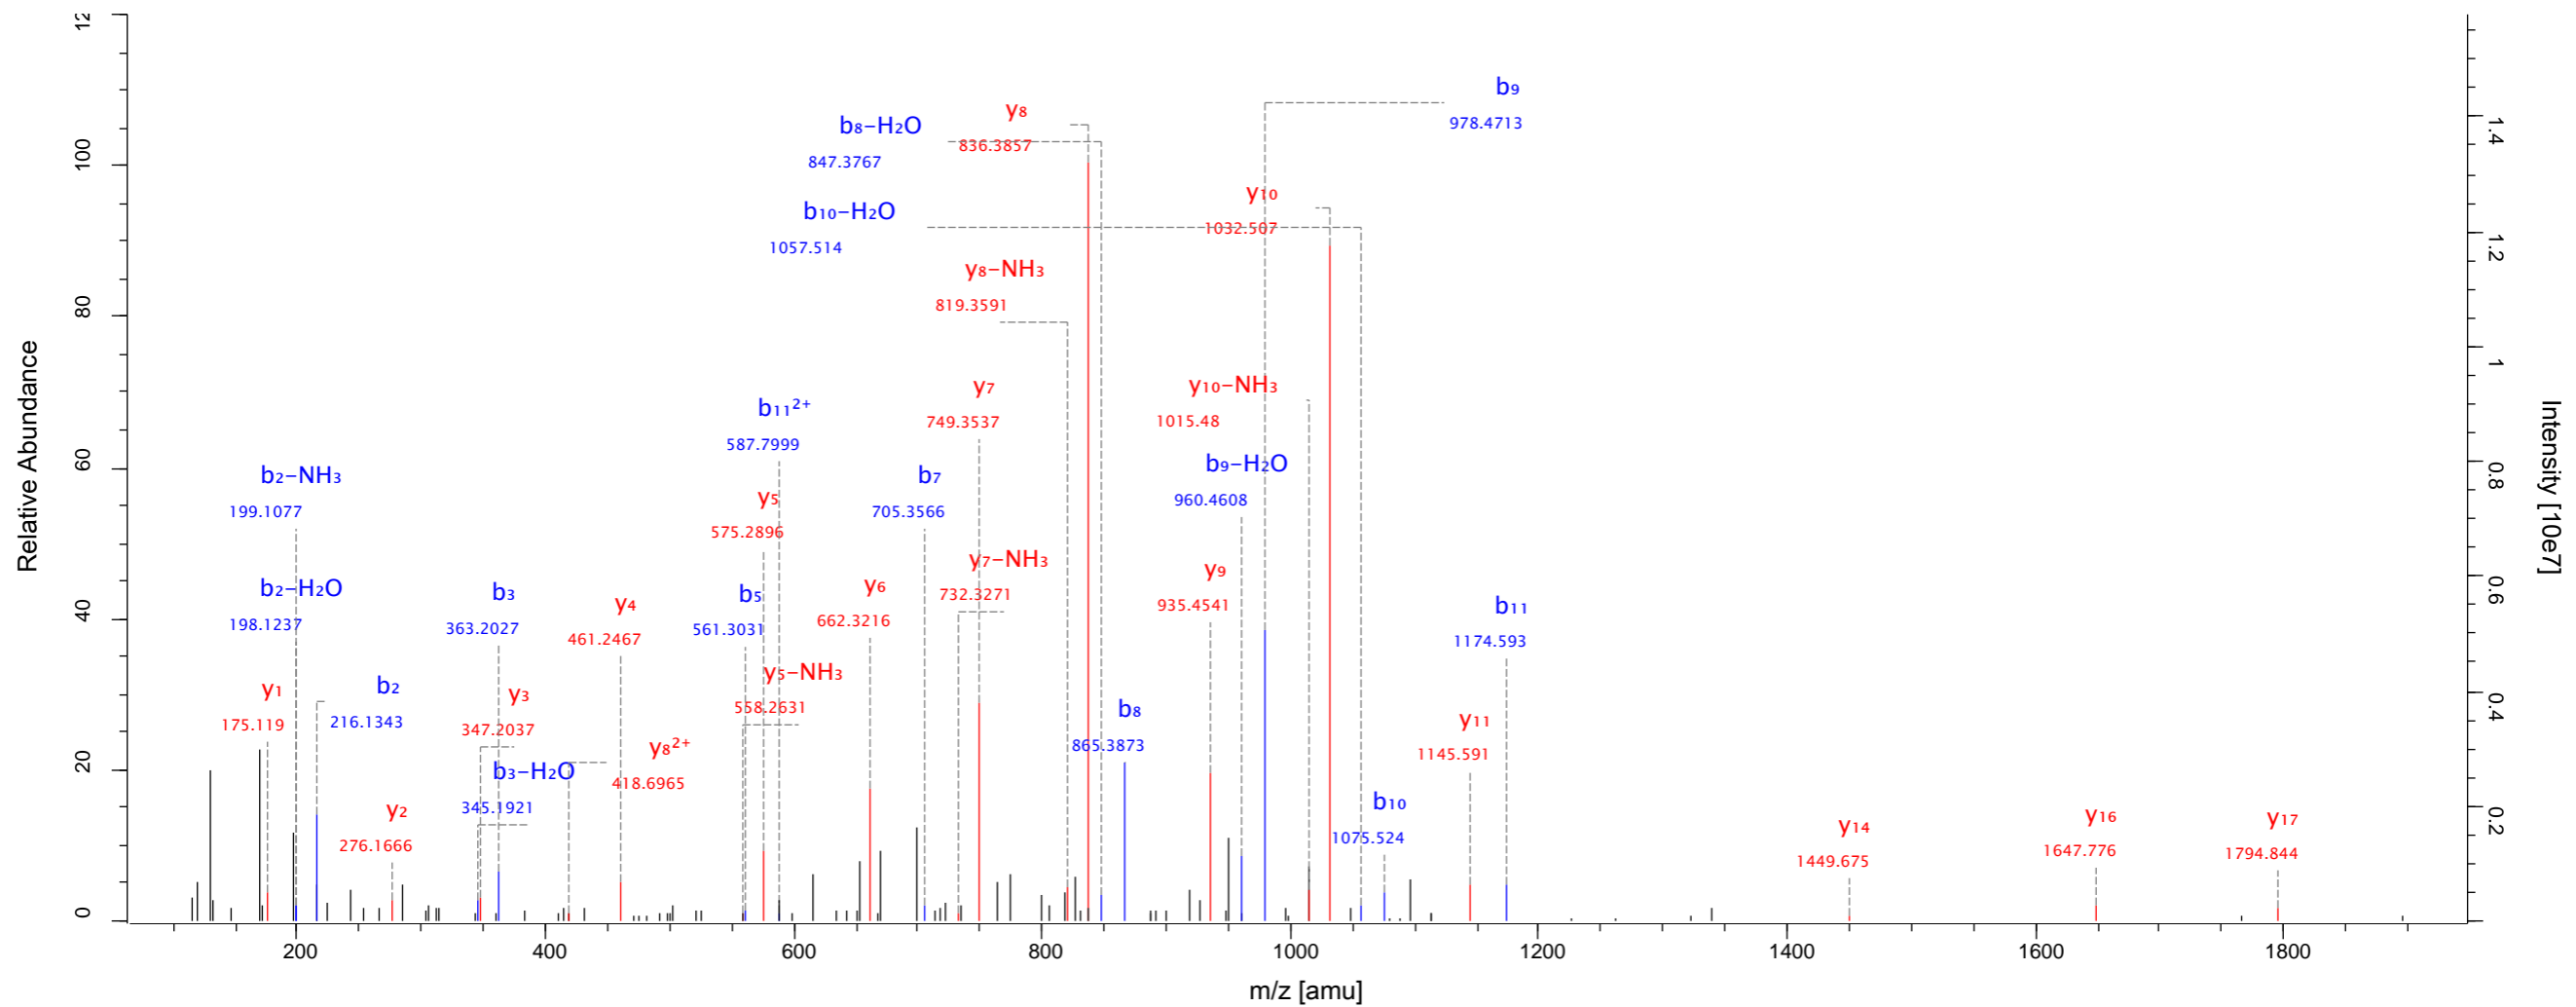

Raw file: 20111212\_EXQ5\_AnMi\_QC\_HCMVp1\_35  
 Scan number: 20375  
 Protein: ORFL106C - NC\_006273.2[53935,54294]- <unknown description>  
 Peptide score: 210.91  
 Method: FTMS; HCD

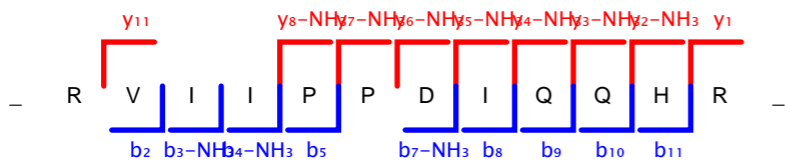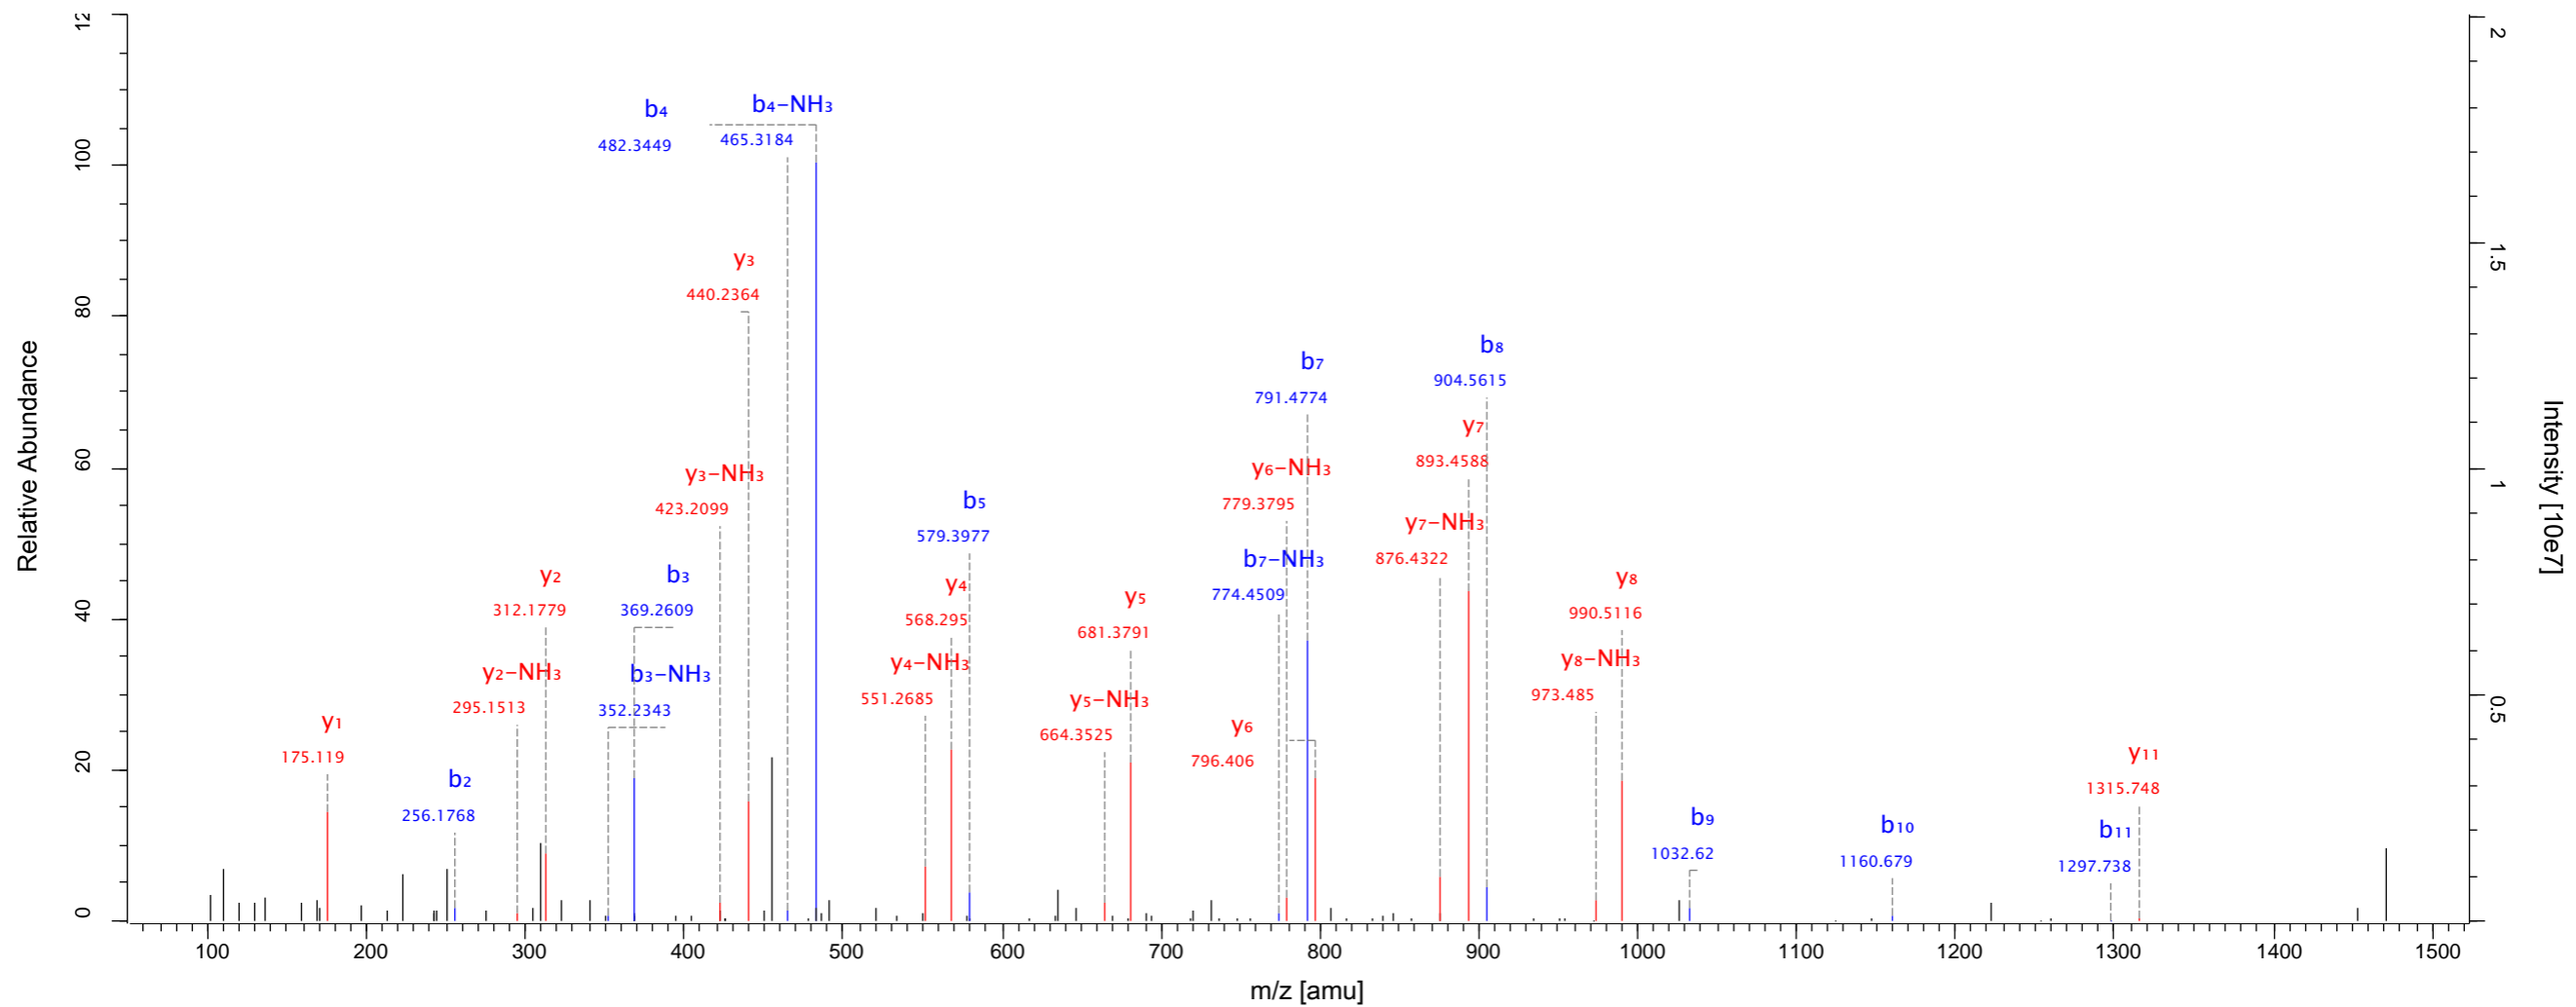



Raw file: 20111212\_EXQ5\_AnMi\_QC\_HCMVp1\_35  
Scan number: 20786  
Protein: ORFL86W + NC\_006273.2[38059,38538]+ <unknown description>  
Peptide score: 125.74  
Method: FTMS; HCD

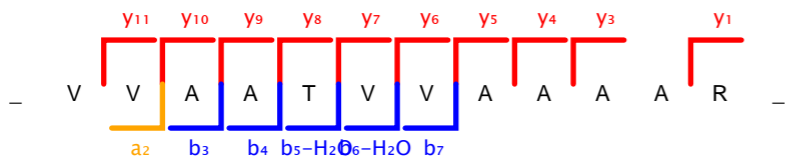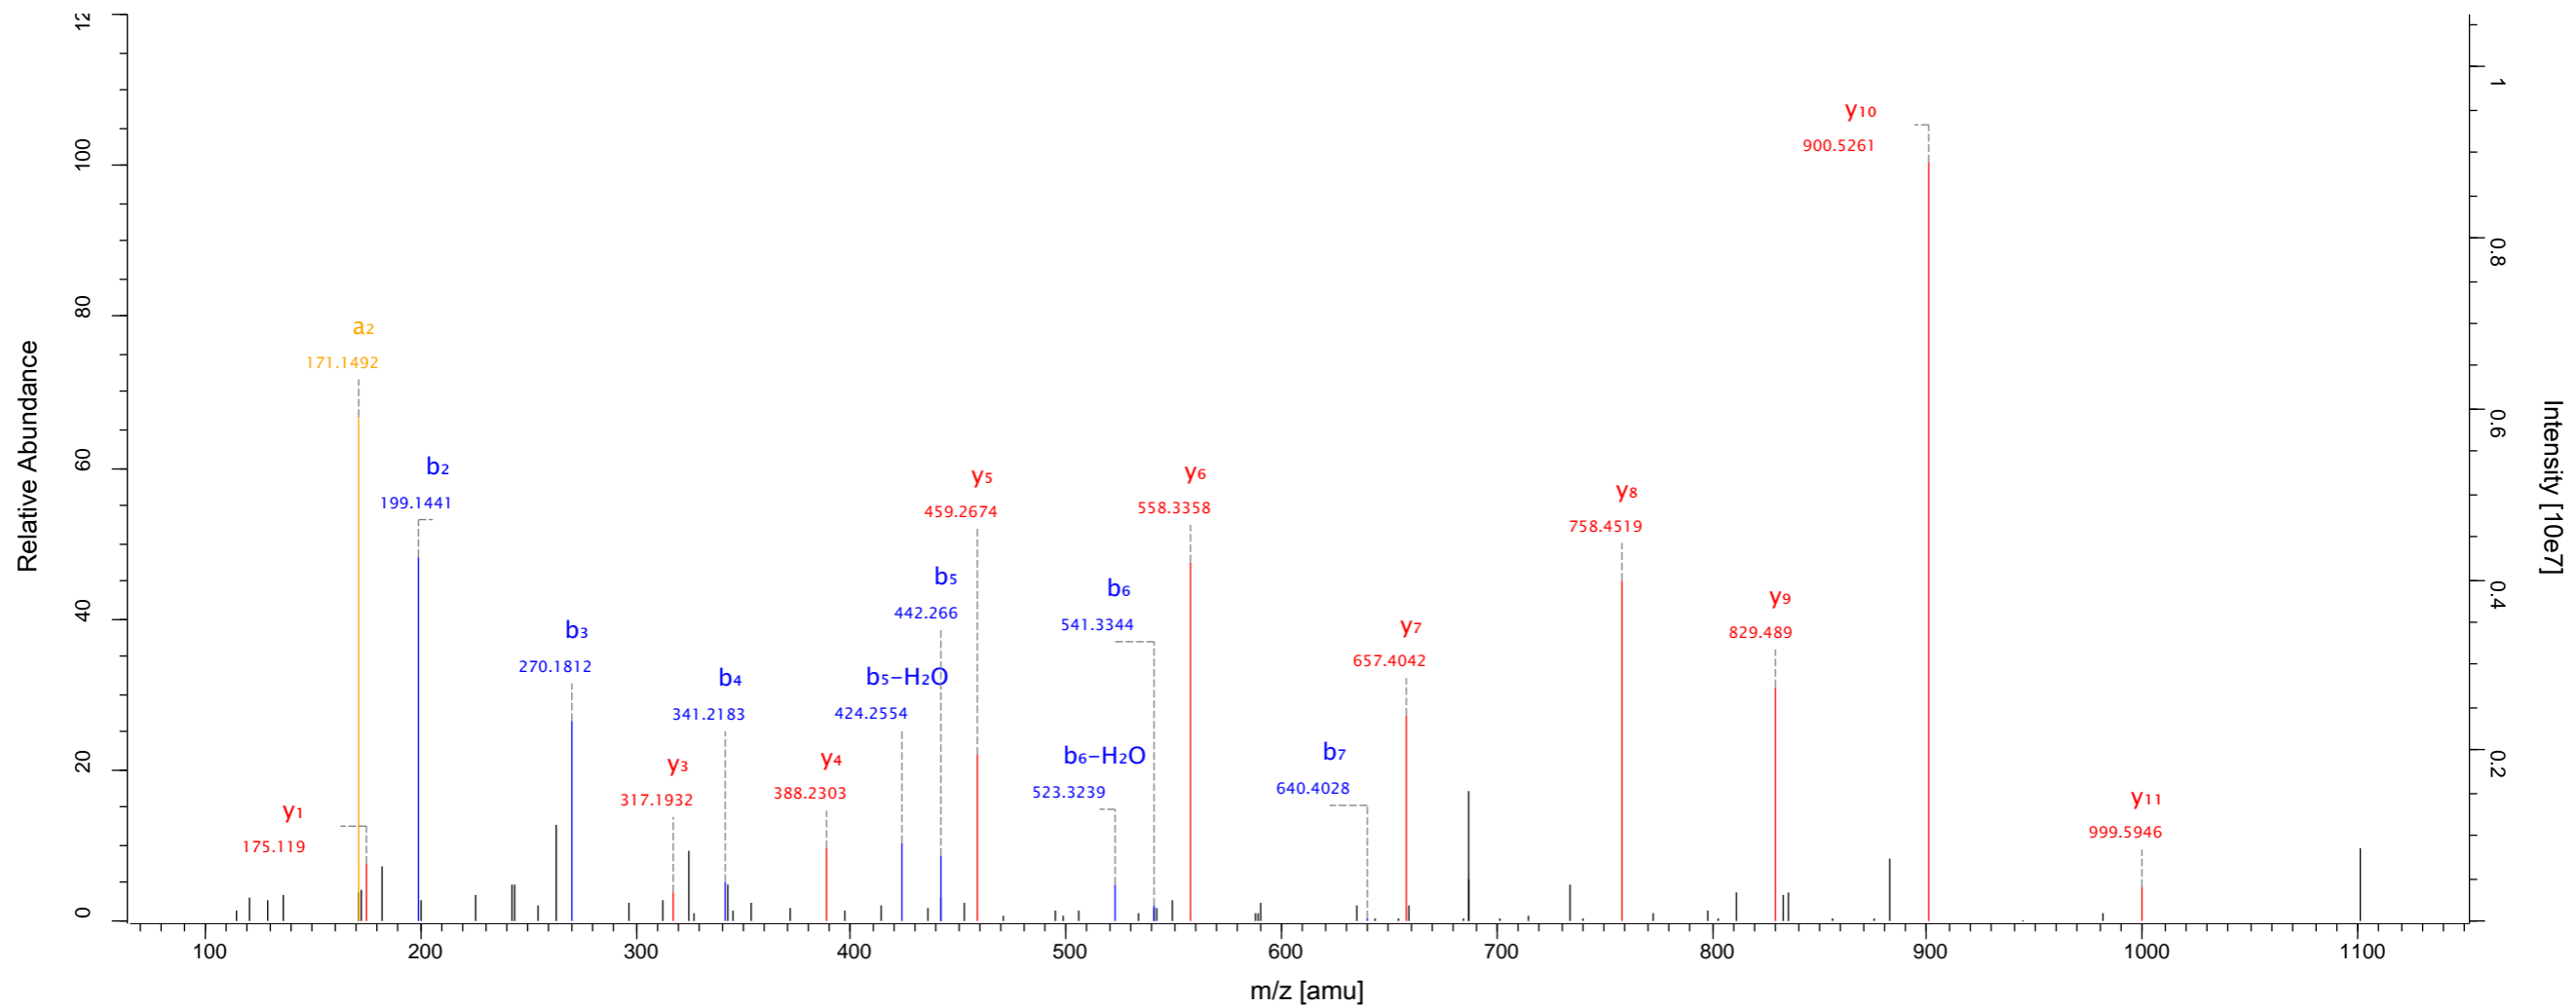

Raw file: 20111212\_EXQ5\_AnMi\_QC\_HCMVp1\_35  
Scan number: 21254  
Protein: ORFL118C - NC\_006273.2[61896,62396]- <unknown description>  
Peptide score: 102.06  
Method: FTMS; HCD

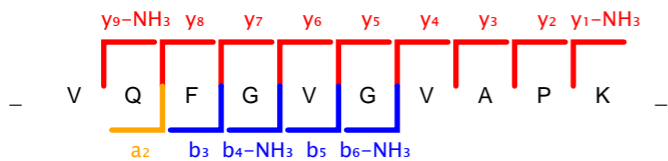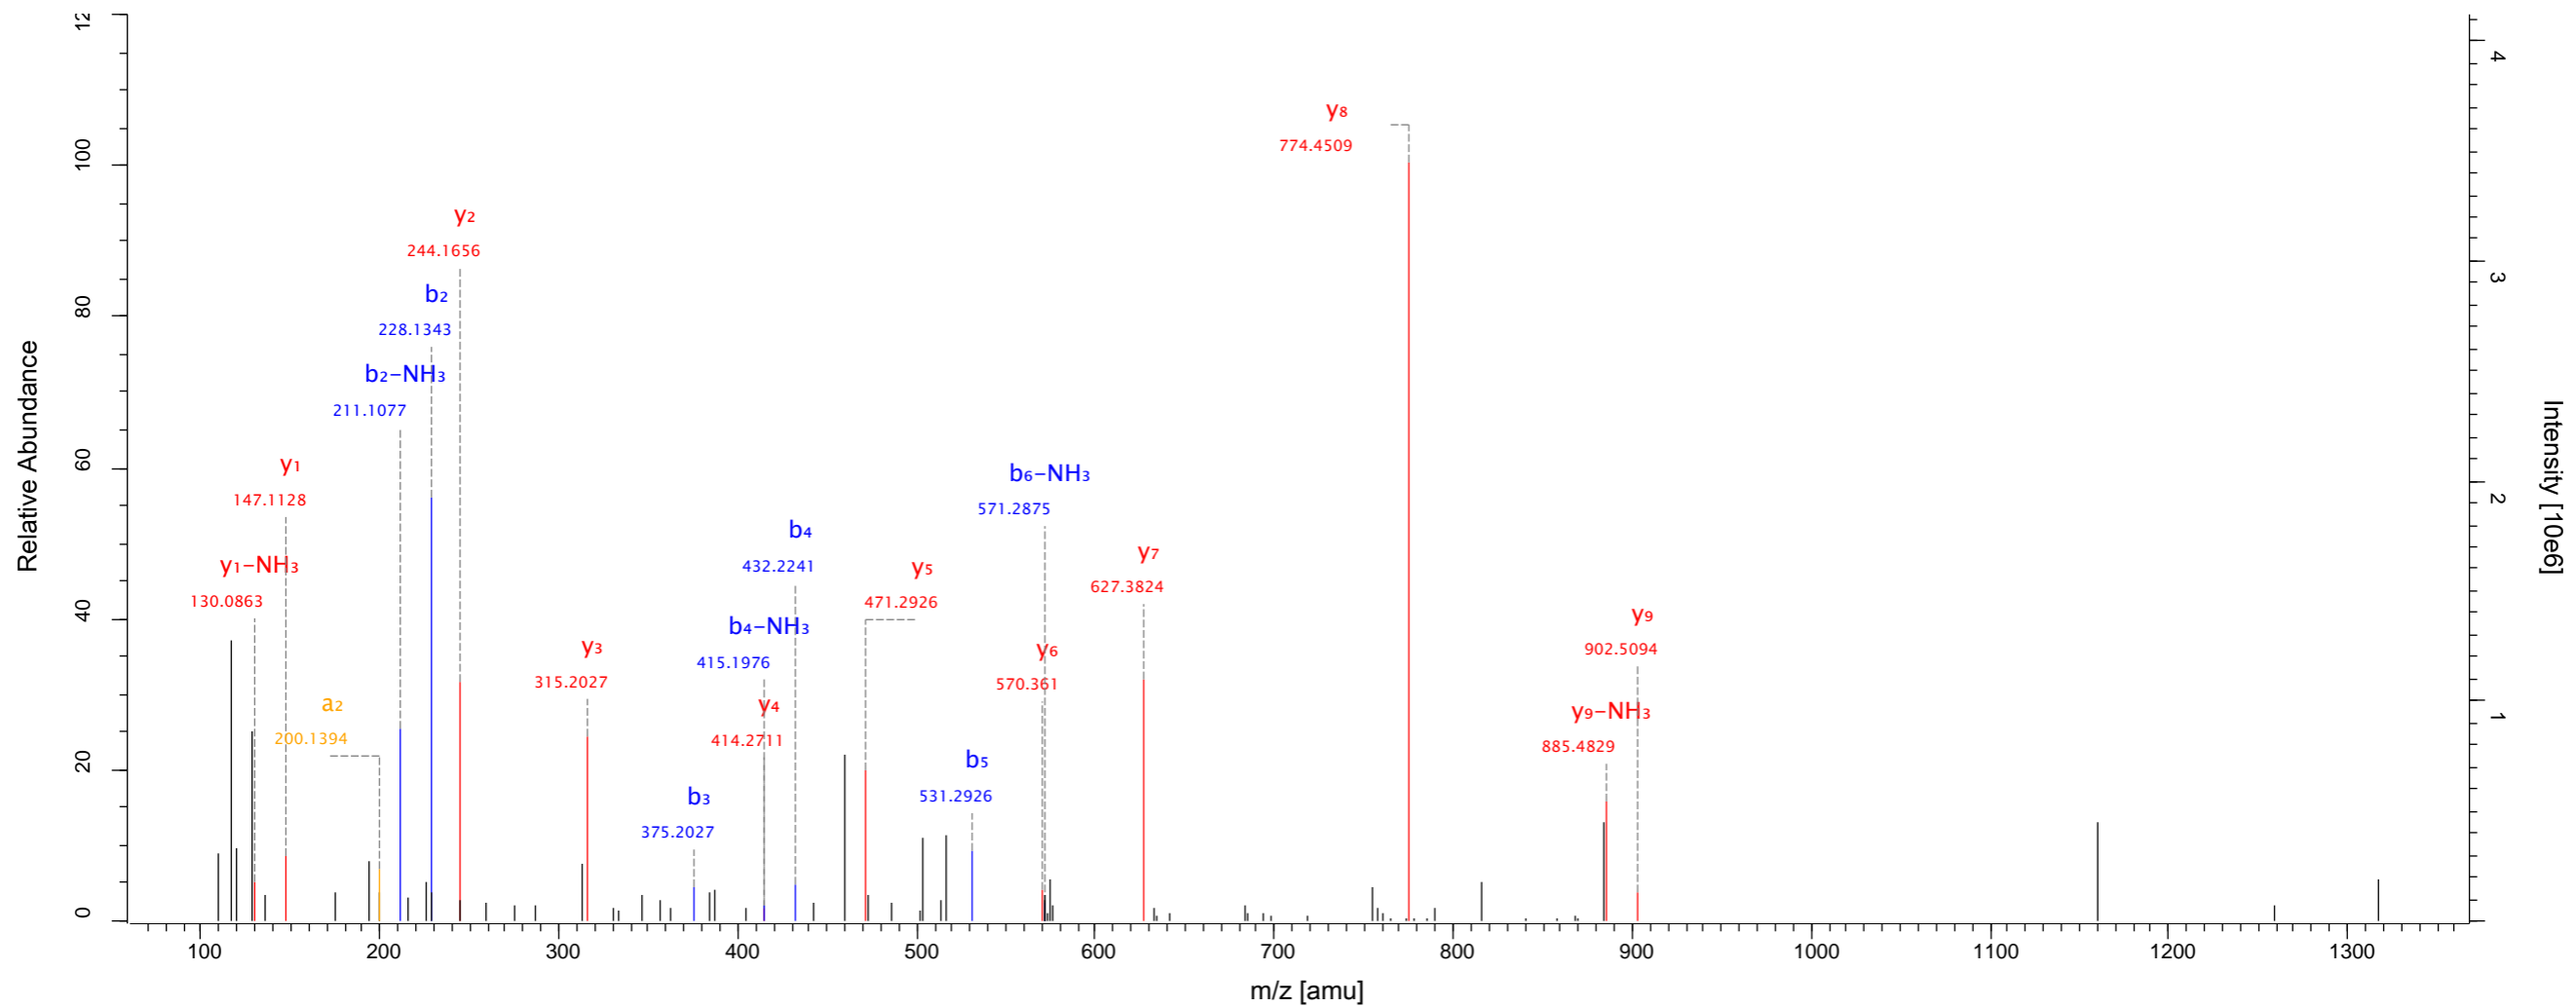

Raw file: 20111212\_EXQ5\_AnMi\_QC\_HCMVp1\_35  
 Scan number: 21604  
 Protein: ORFL294W.iORF1 + NC\_006273.2[183230,193441]+ <unknown description>; ORFL294W + NC\_006273.2[183230,193441]+ <unknown description>  
 Peptide score: 197.51  
 Method: FTMS; HCD

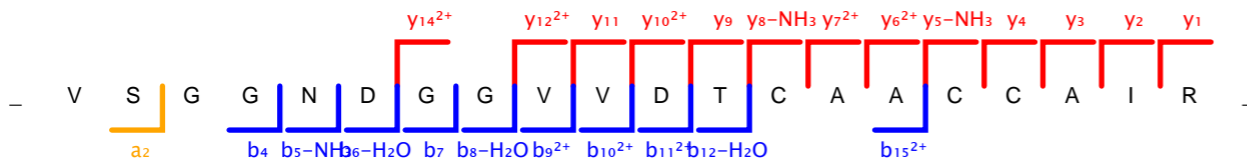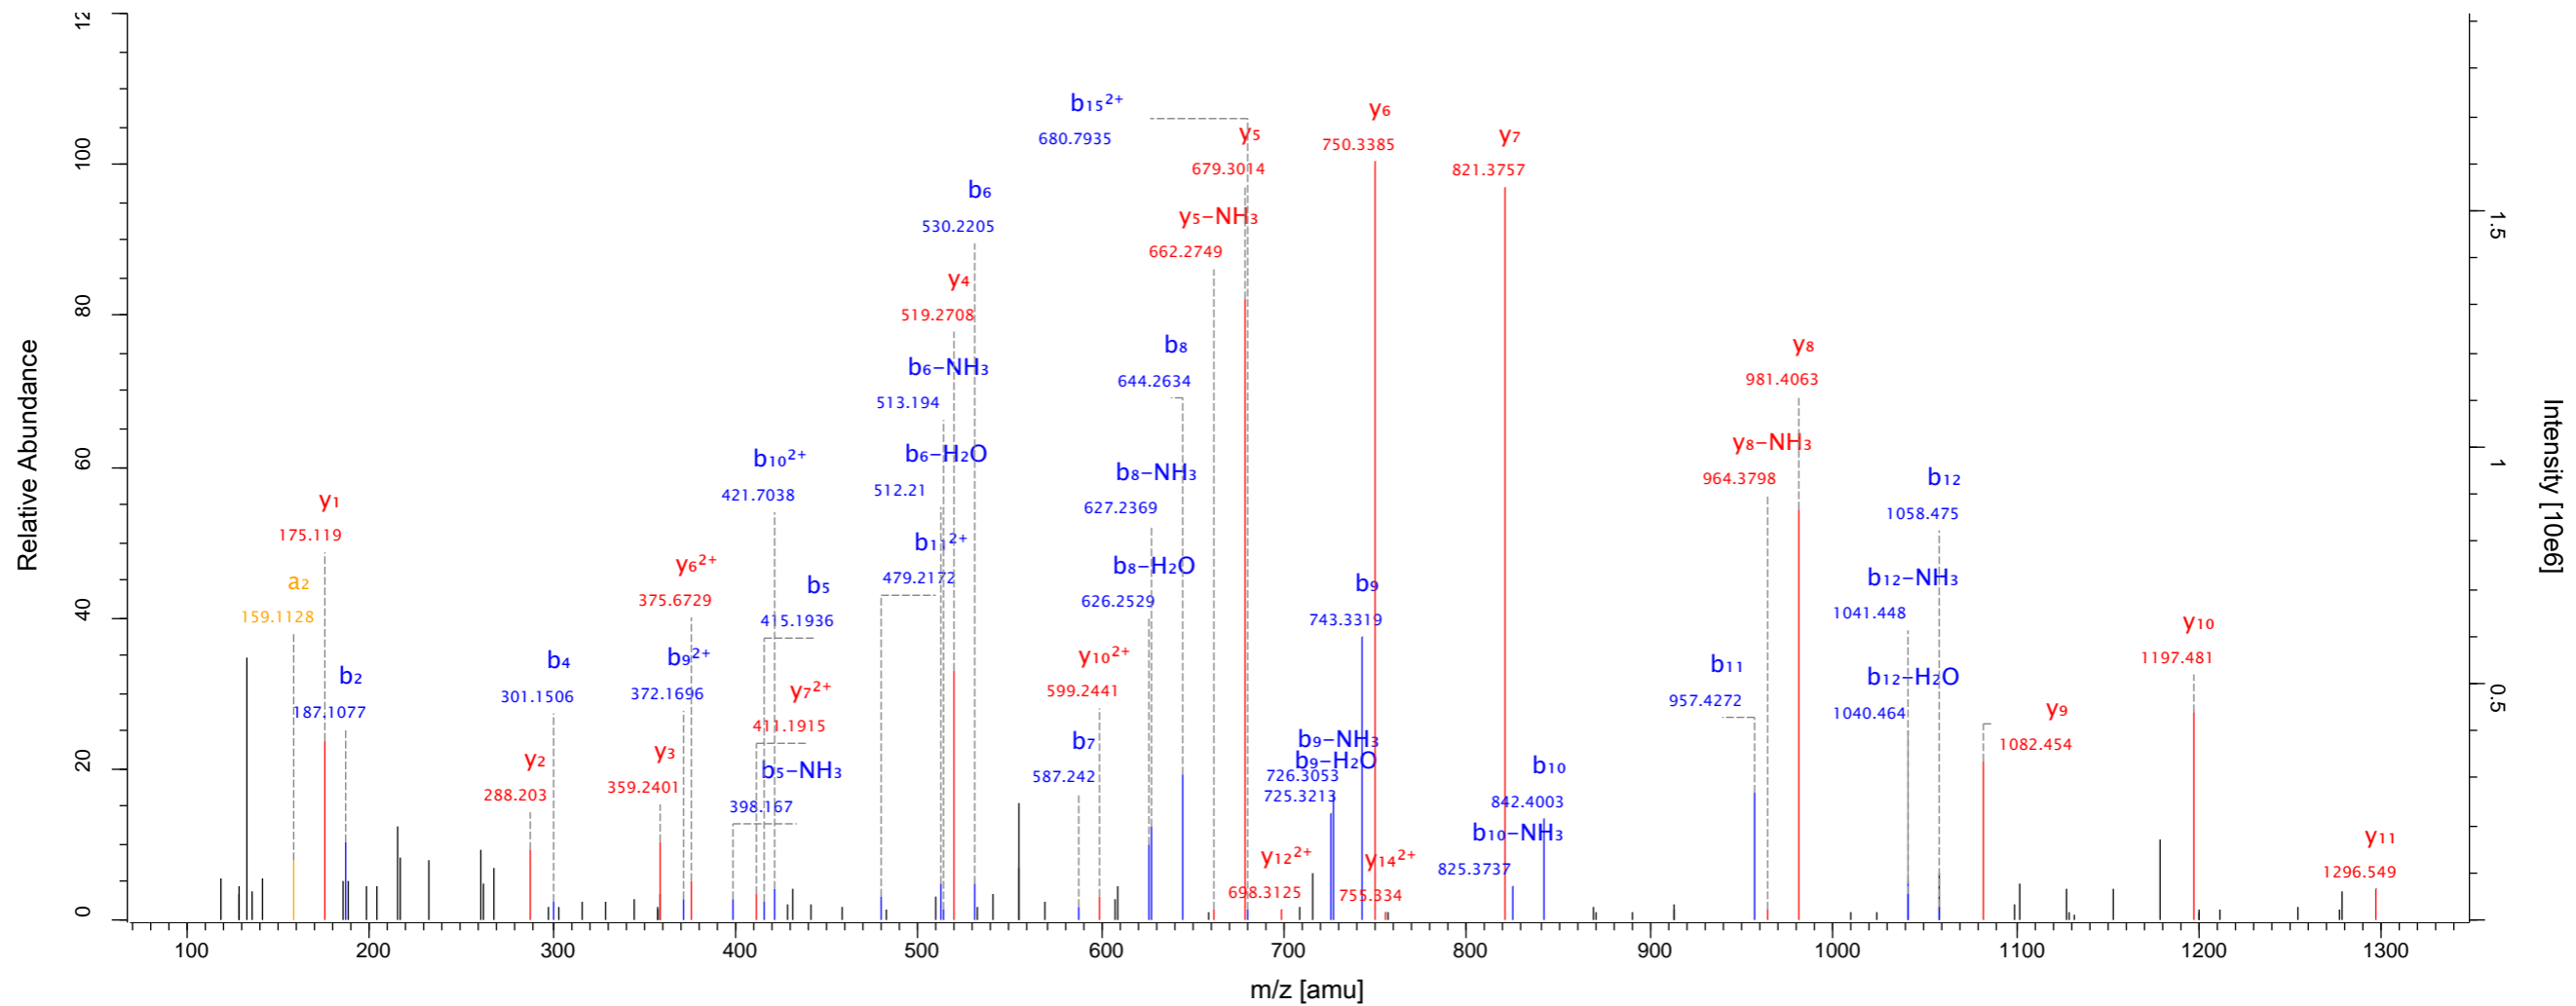

Raw file: 20111212\_EXQ5\_AnMi\_QC\_HCMVp11\_35  
 Scan number: 22020  
 Protein: ORFL294W.iORF1 + NC\_006273.2[183230,193441]+ <unknown description>; ORFL294W + NC\_006273.2[183230,193441]+ <unknown description>  
 Peptide score: 198.33  
 Method: FTMS; HCD

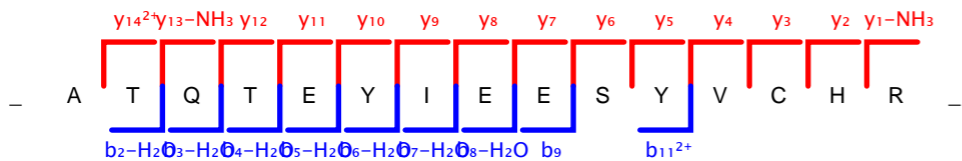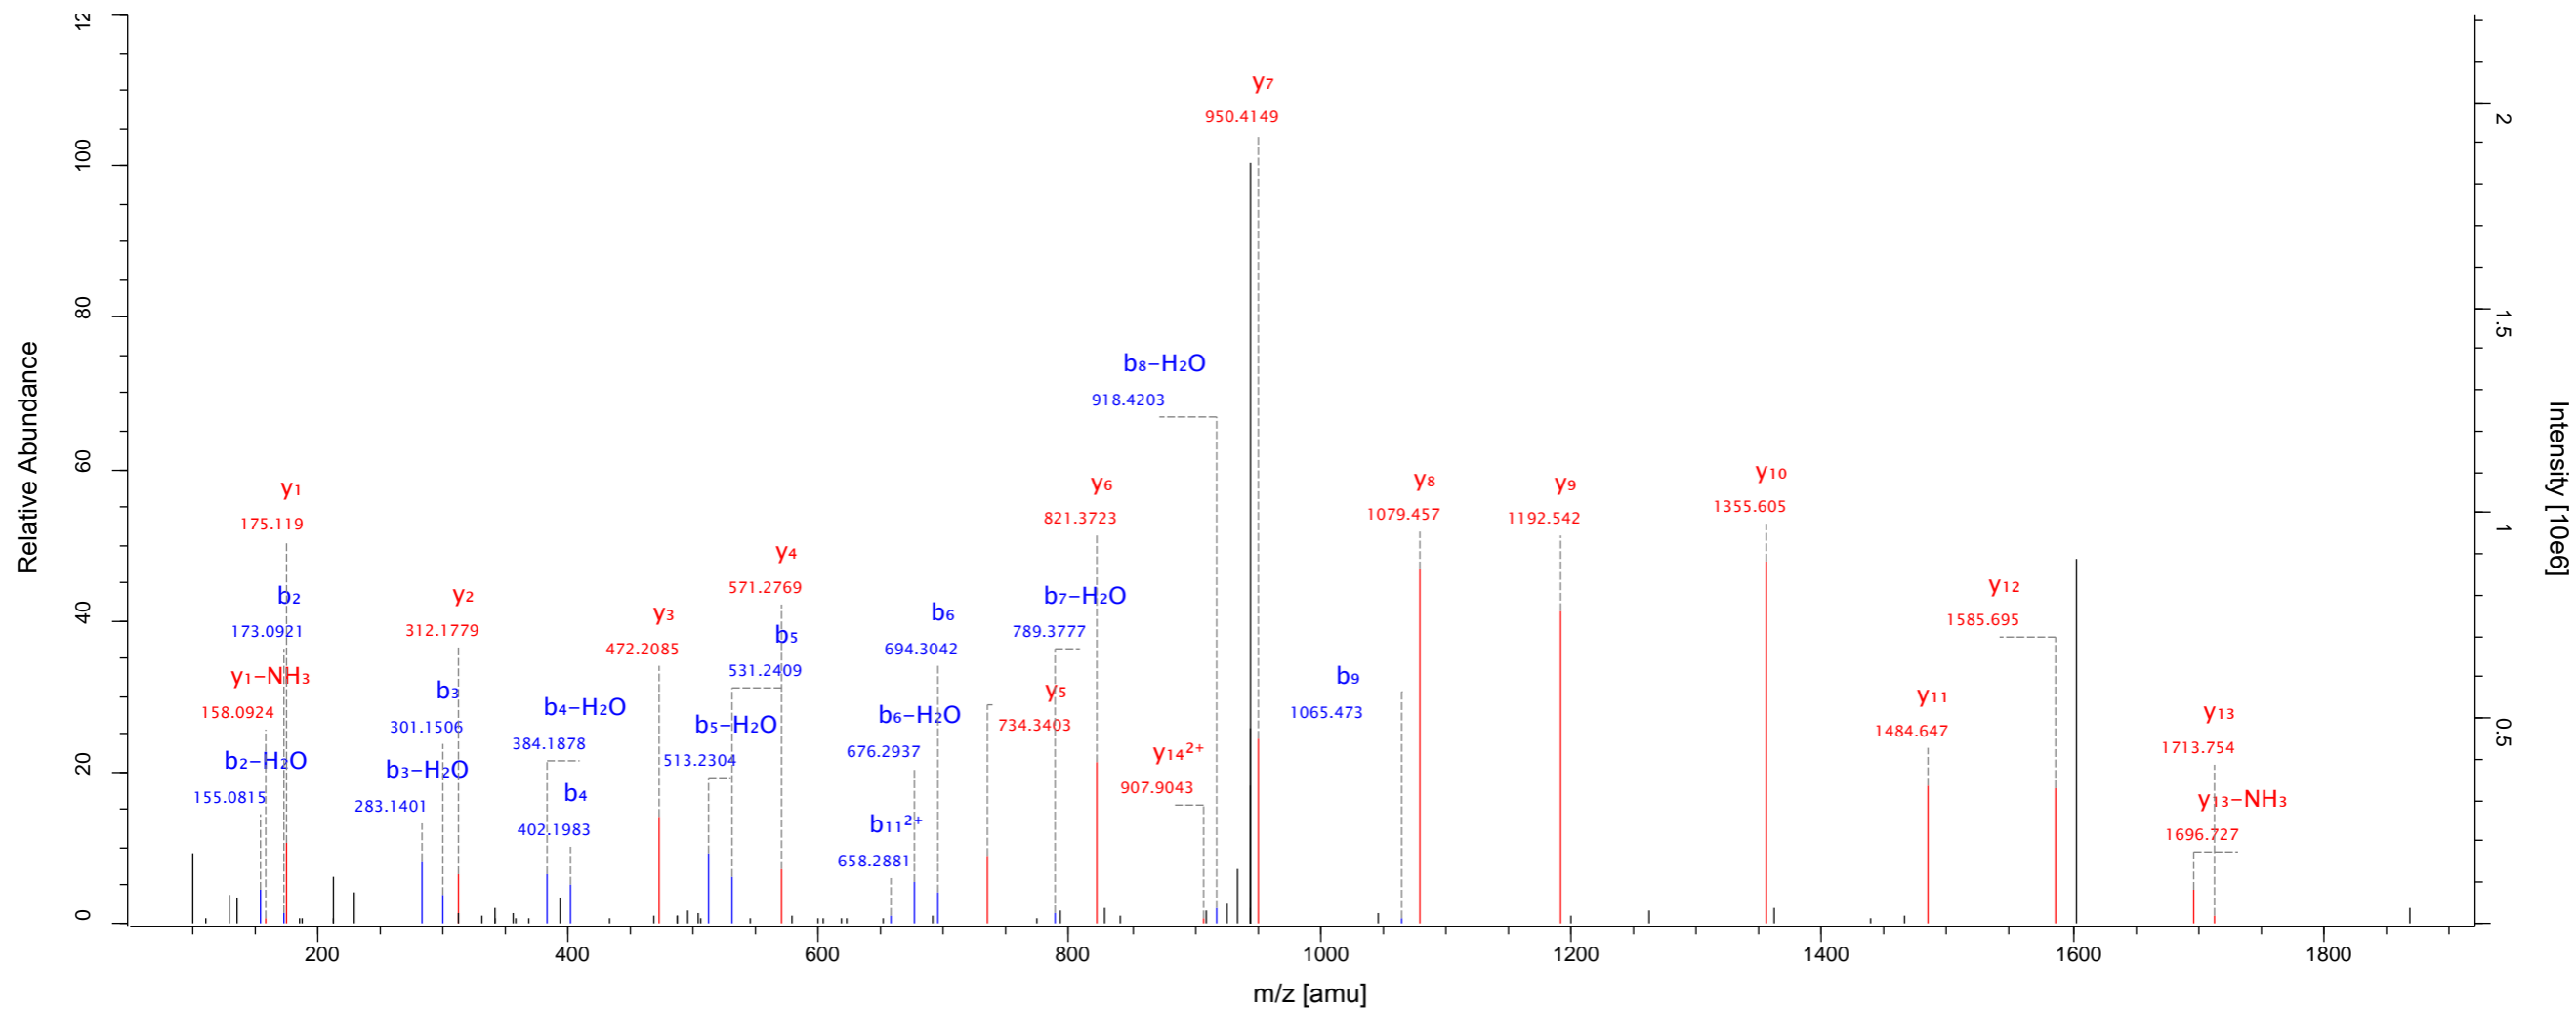

Raw file: 20111212\_EXQ5\_AnMi\_QC\_HCMVp1\_35  
Scan number: 24092  
Protein: ORFL142W + NC\_006273.2[78726,79031]+ <unknown description>  
Peptide score: 122.51  
Method: FTMS; HCD

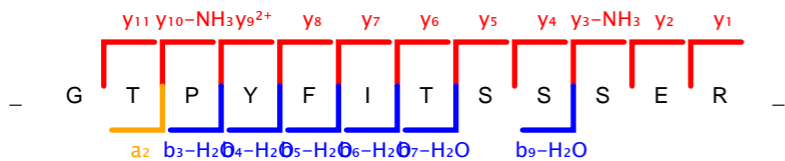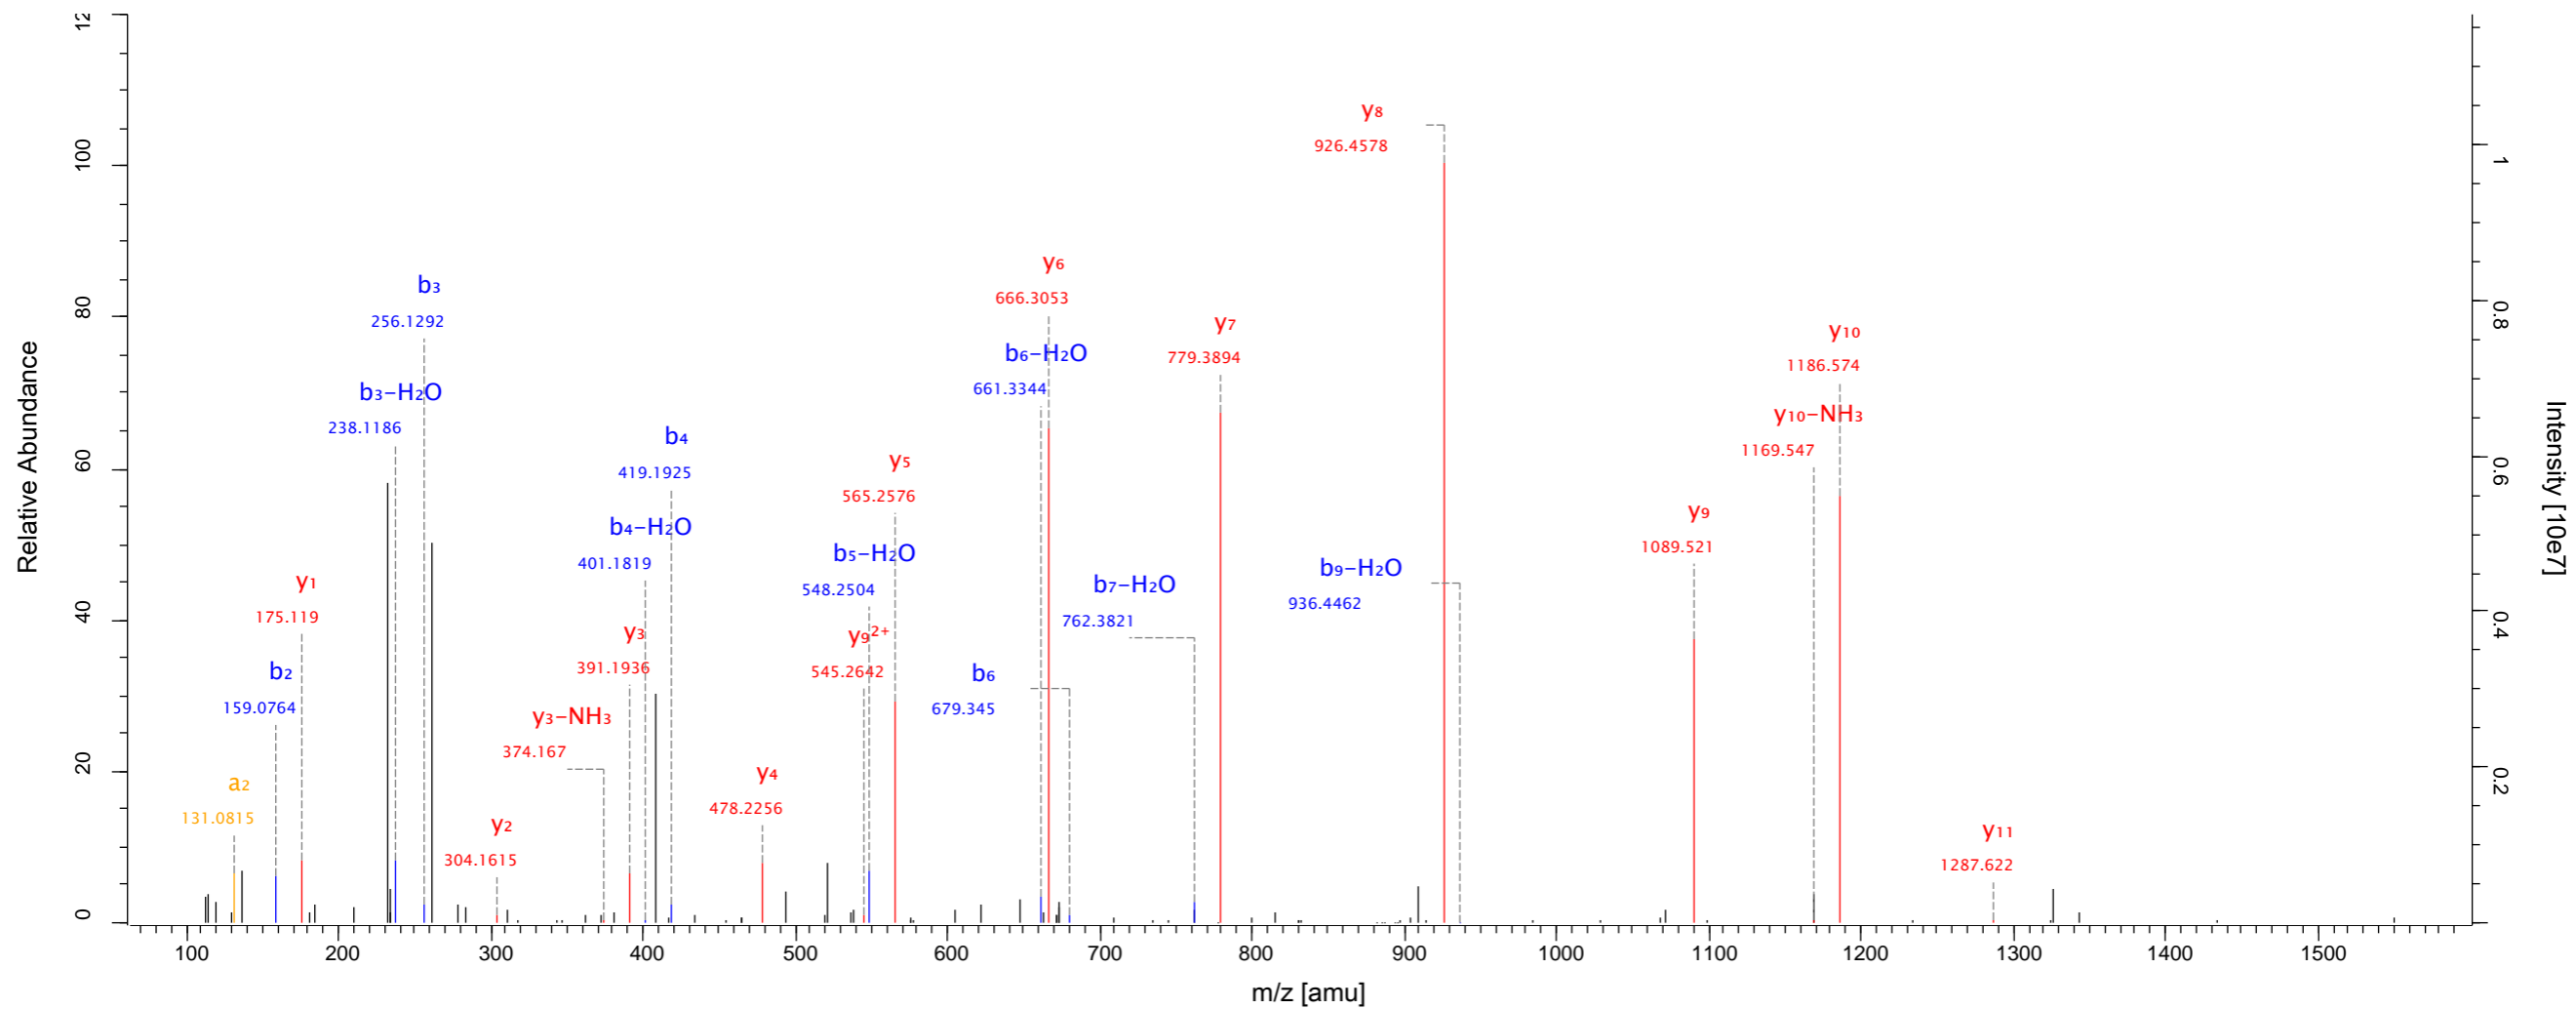

Raw file: 20111212\_EXQ5\_AnMi\_QC\_HCMVpl1\_35  
Scan number: 26775  
Protein: ORFL224C.iORF1 - NC\_006273.2[134354,134734]- <unknown description>  
Peptide score: 93.01  
Method: FTMS; HCD

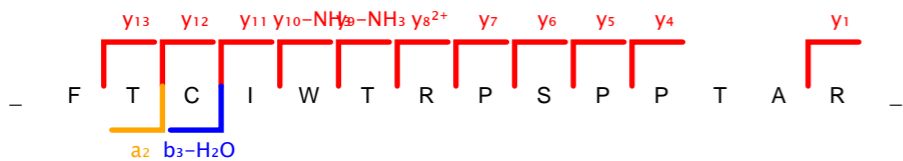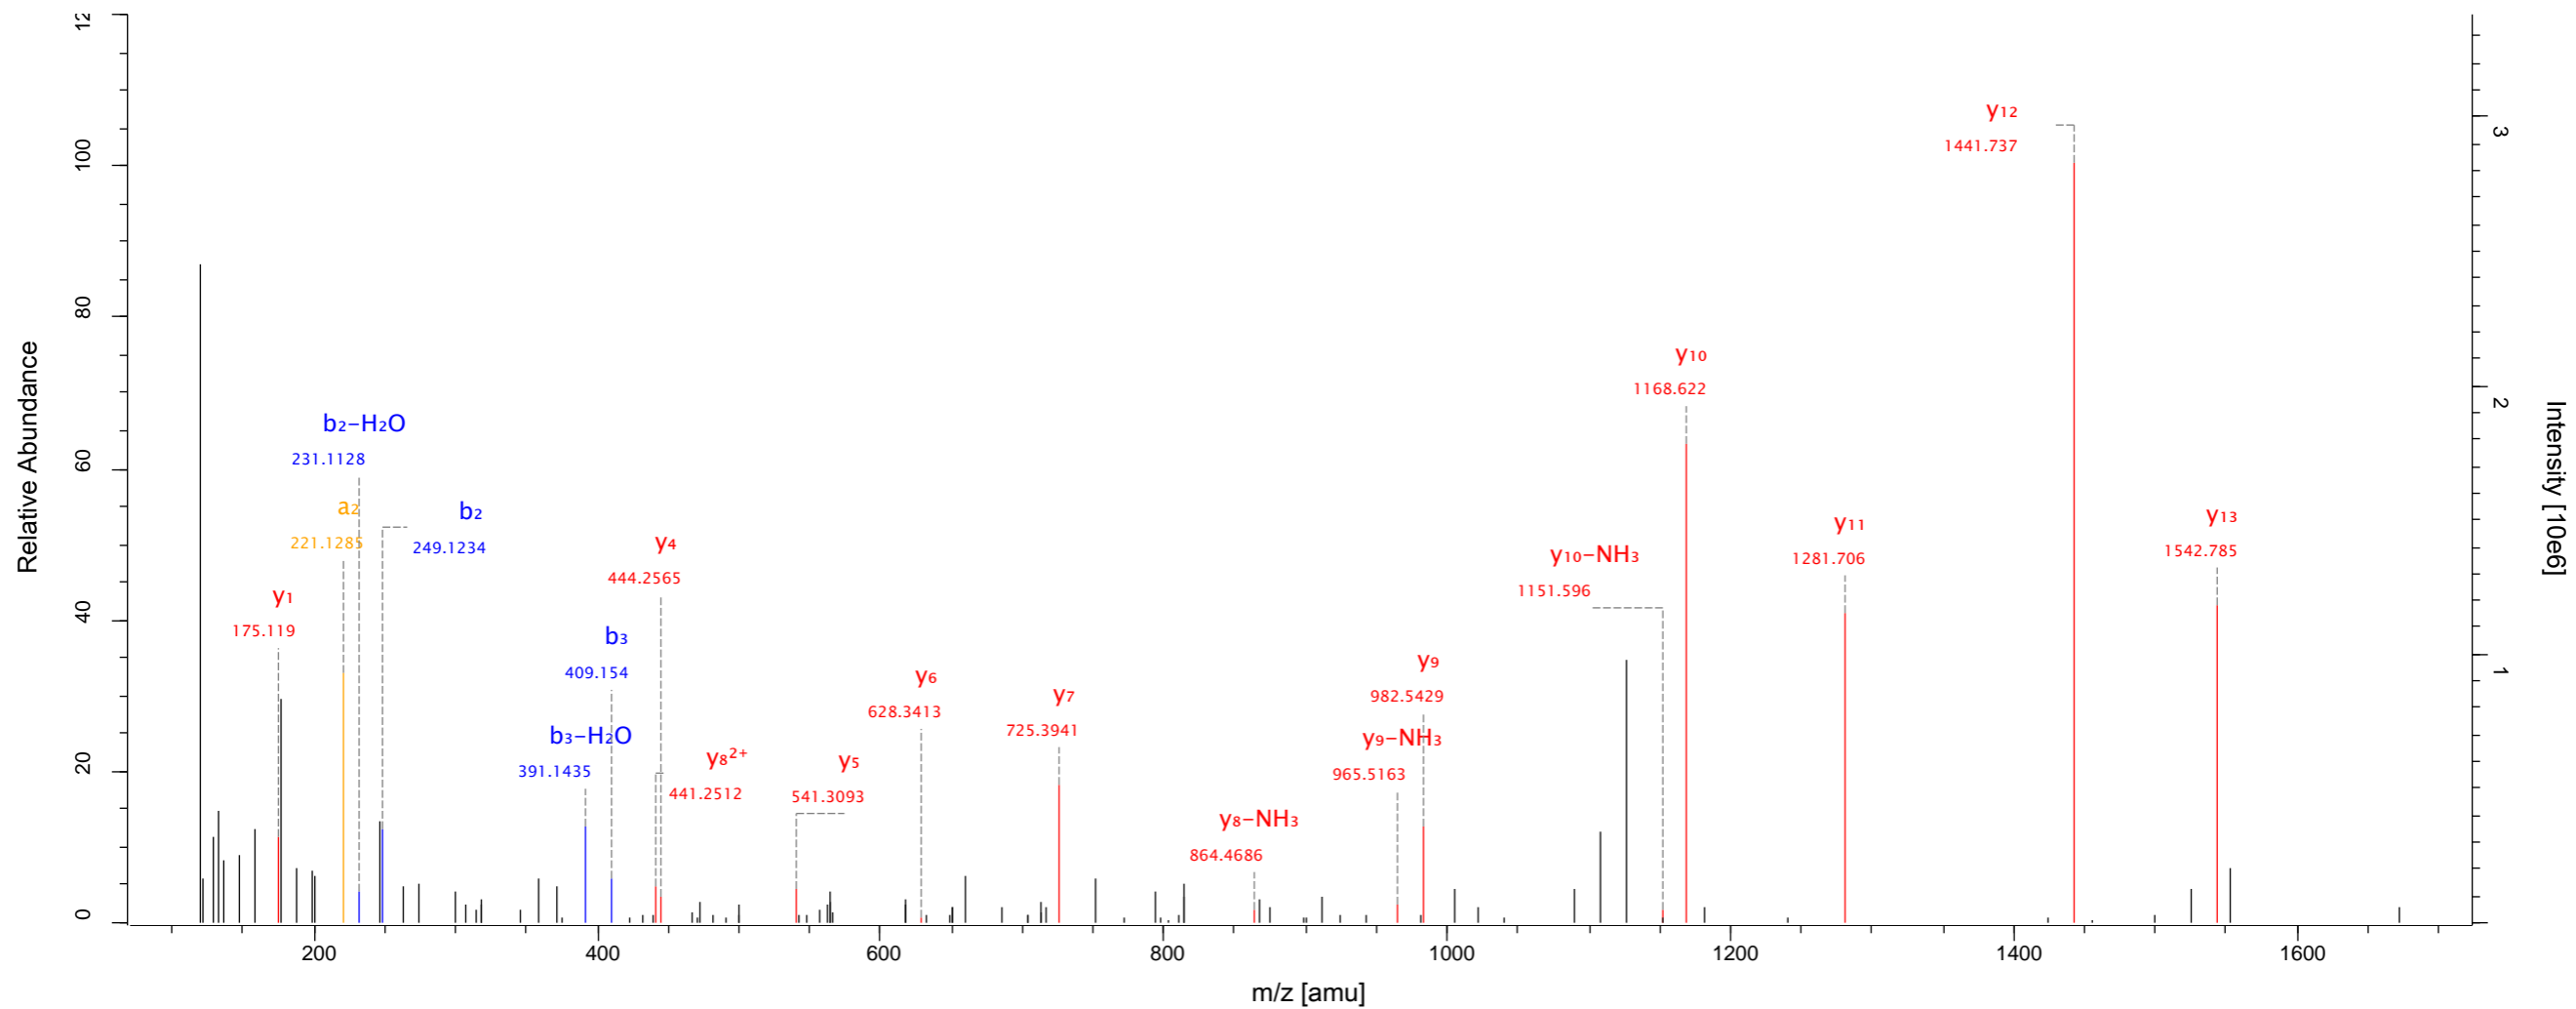

Raw file: 20111212\_EXQ5\_AnMi\_QC\_HCMVp1\_35  
 Scan number: 28409  
 Protein: ORFL130W + NC\_006273.2[72313,72744]+ <unknown description>  
 Peptide score: 160.77  
 Method: FTMS; HCD

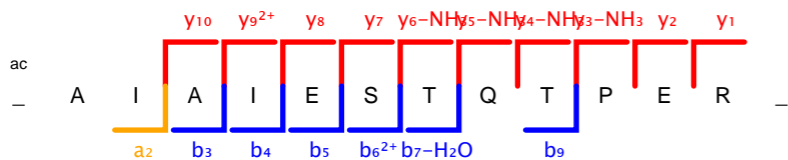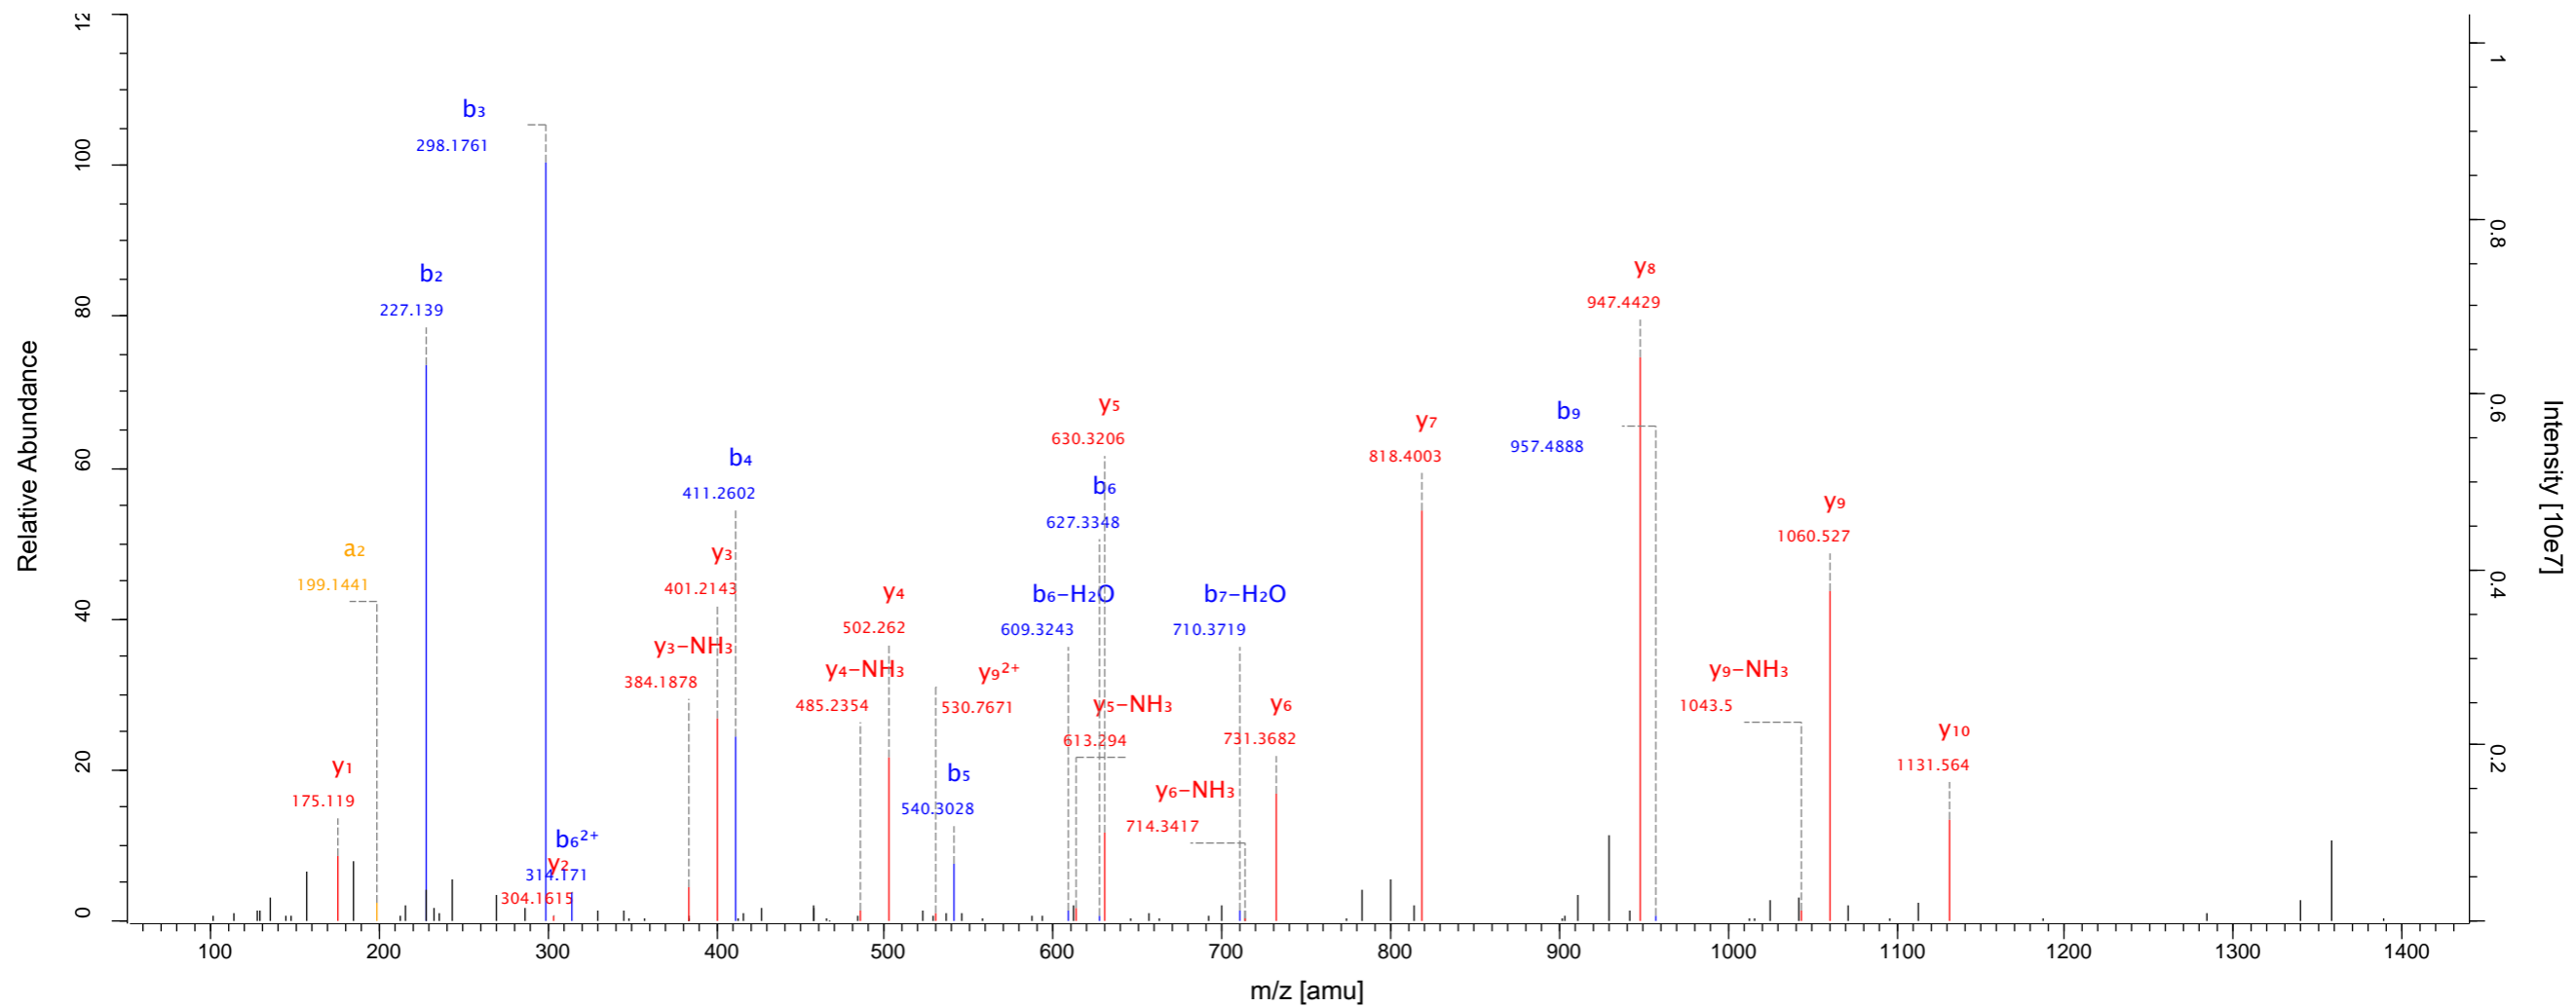

Raw file: 20111212\_EXQ5\_AnMi\_QC\_HCMVp1\_35  
 Scan number: 33784  
 Protein: ORFL86W + NC\_006273.2[38059,38538]+ <unknown description>  
 Peptide score: 198.14  
 Method: FTMS; HCD

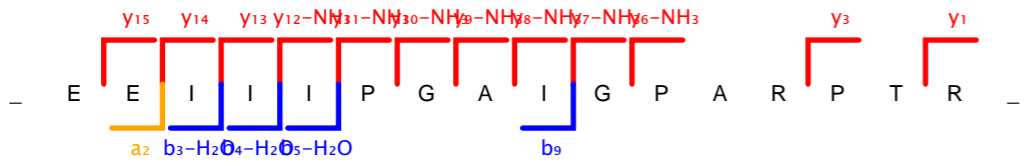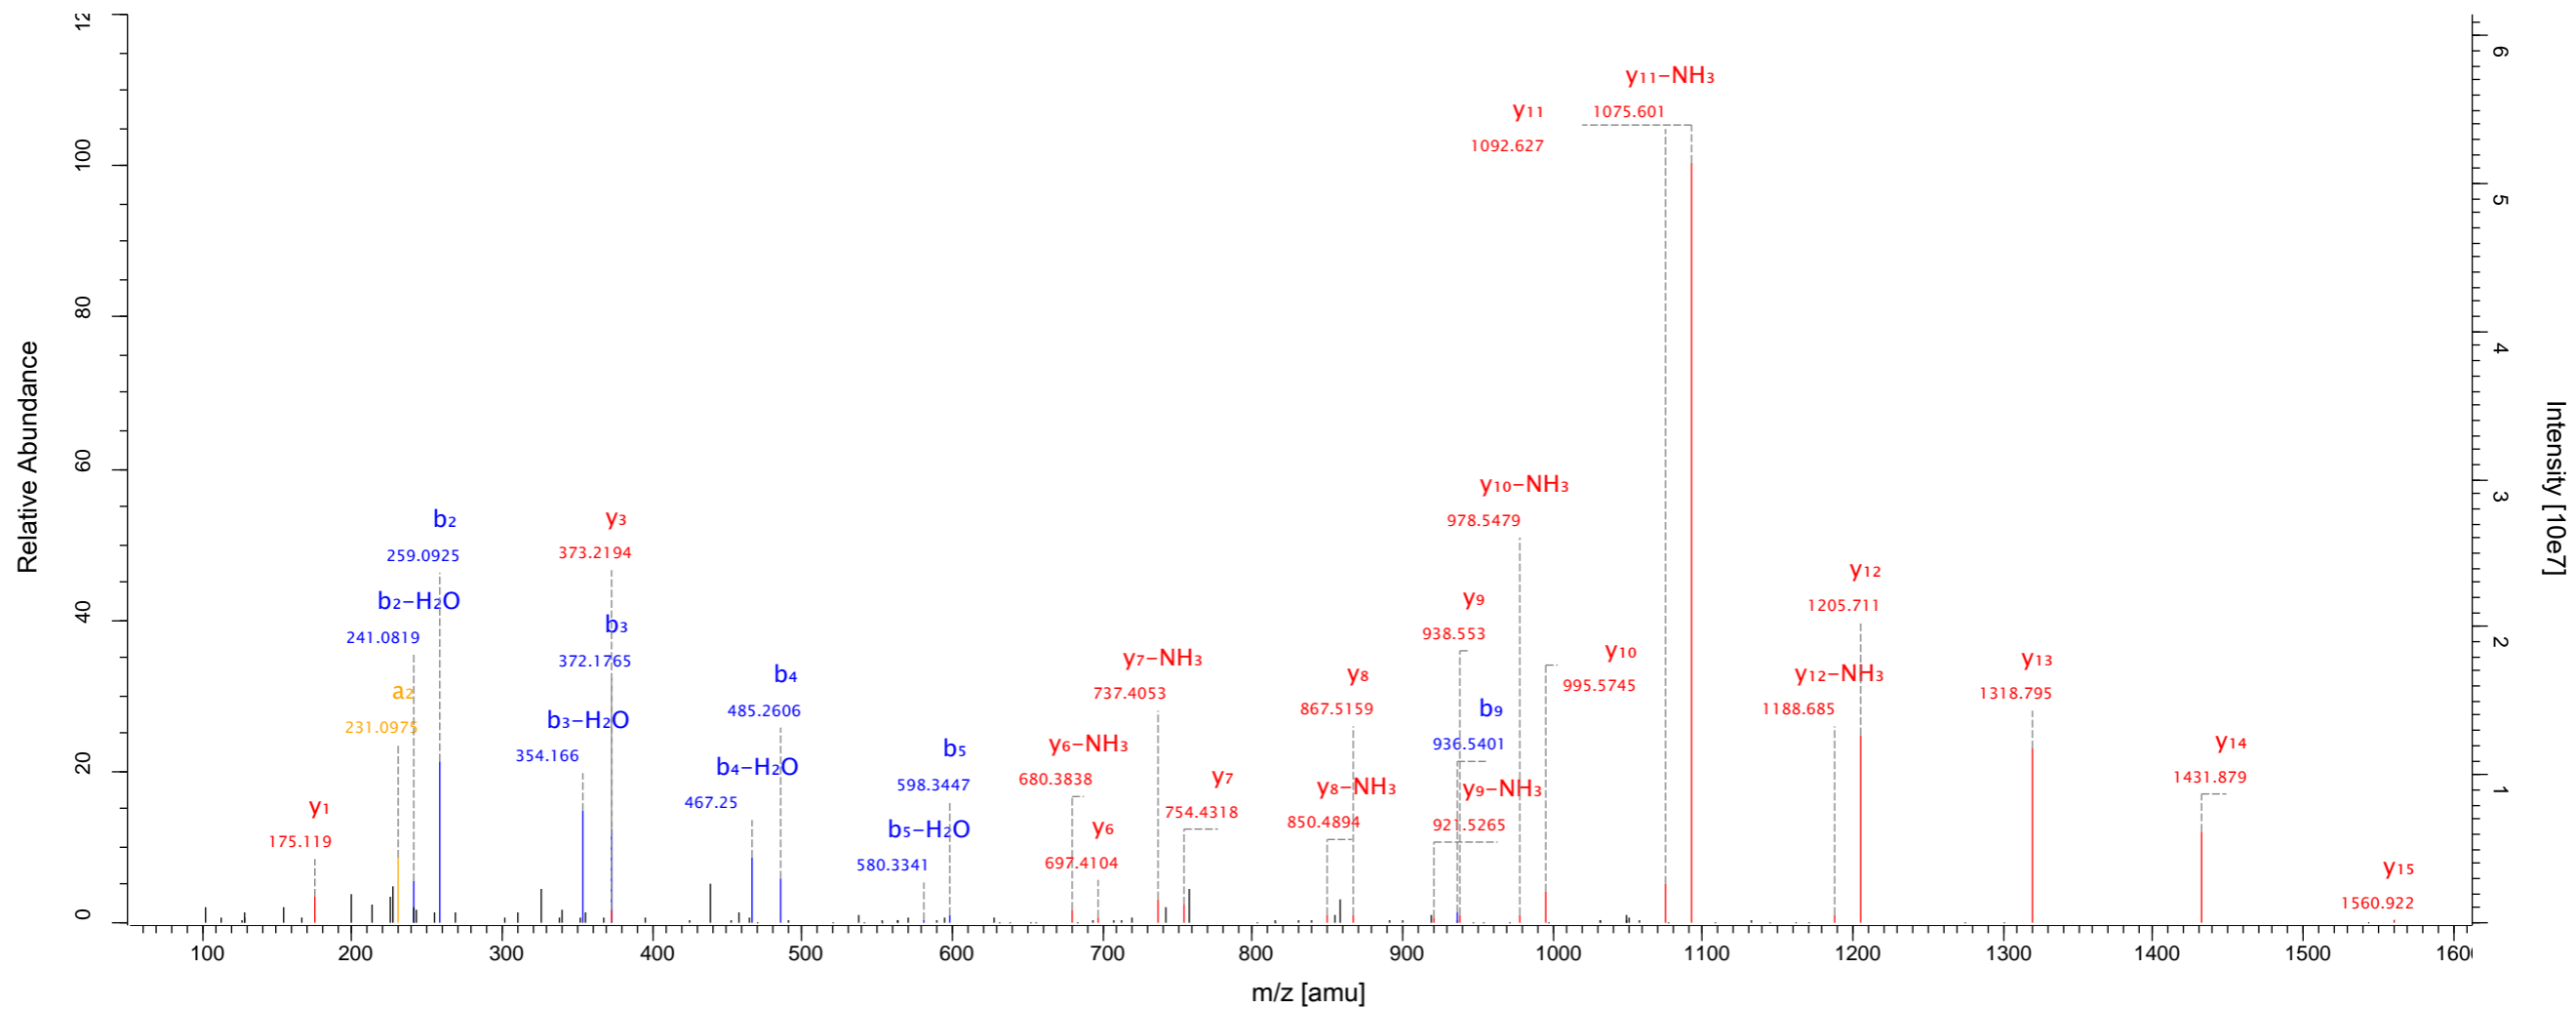



Raw file: 20111212\_EXQ5\_AnMi\_QC\_HCMVp11\_35  
Scan number: 34491  
Protein: ORFL161C.iORF2 - NC\_006273.2[101063,101479]- <unknown description>  
Peptide score: 123.38  
Method: FTMS; HCD

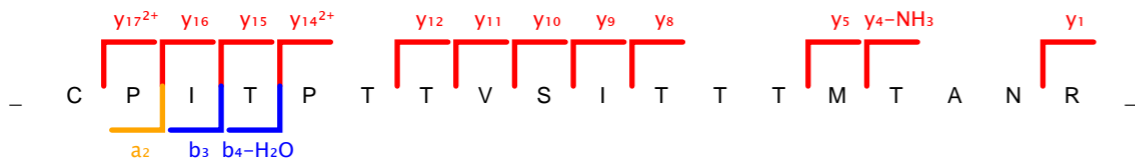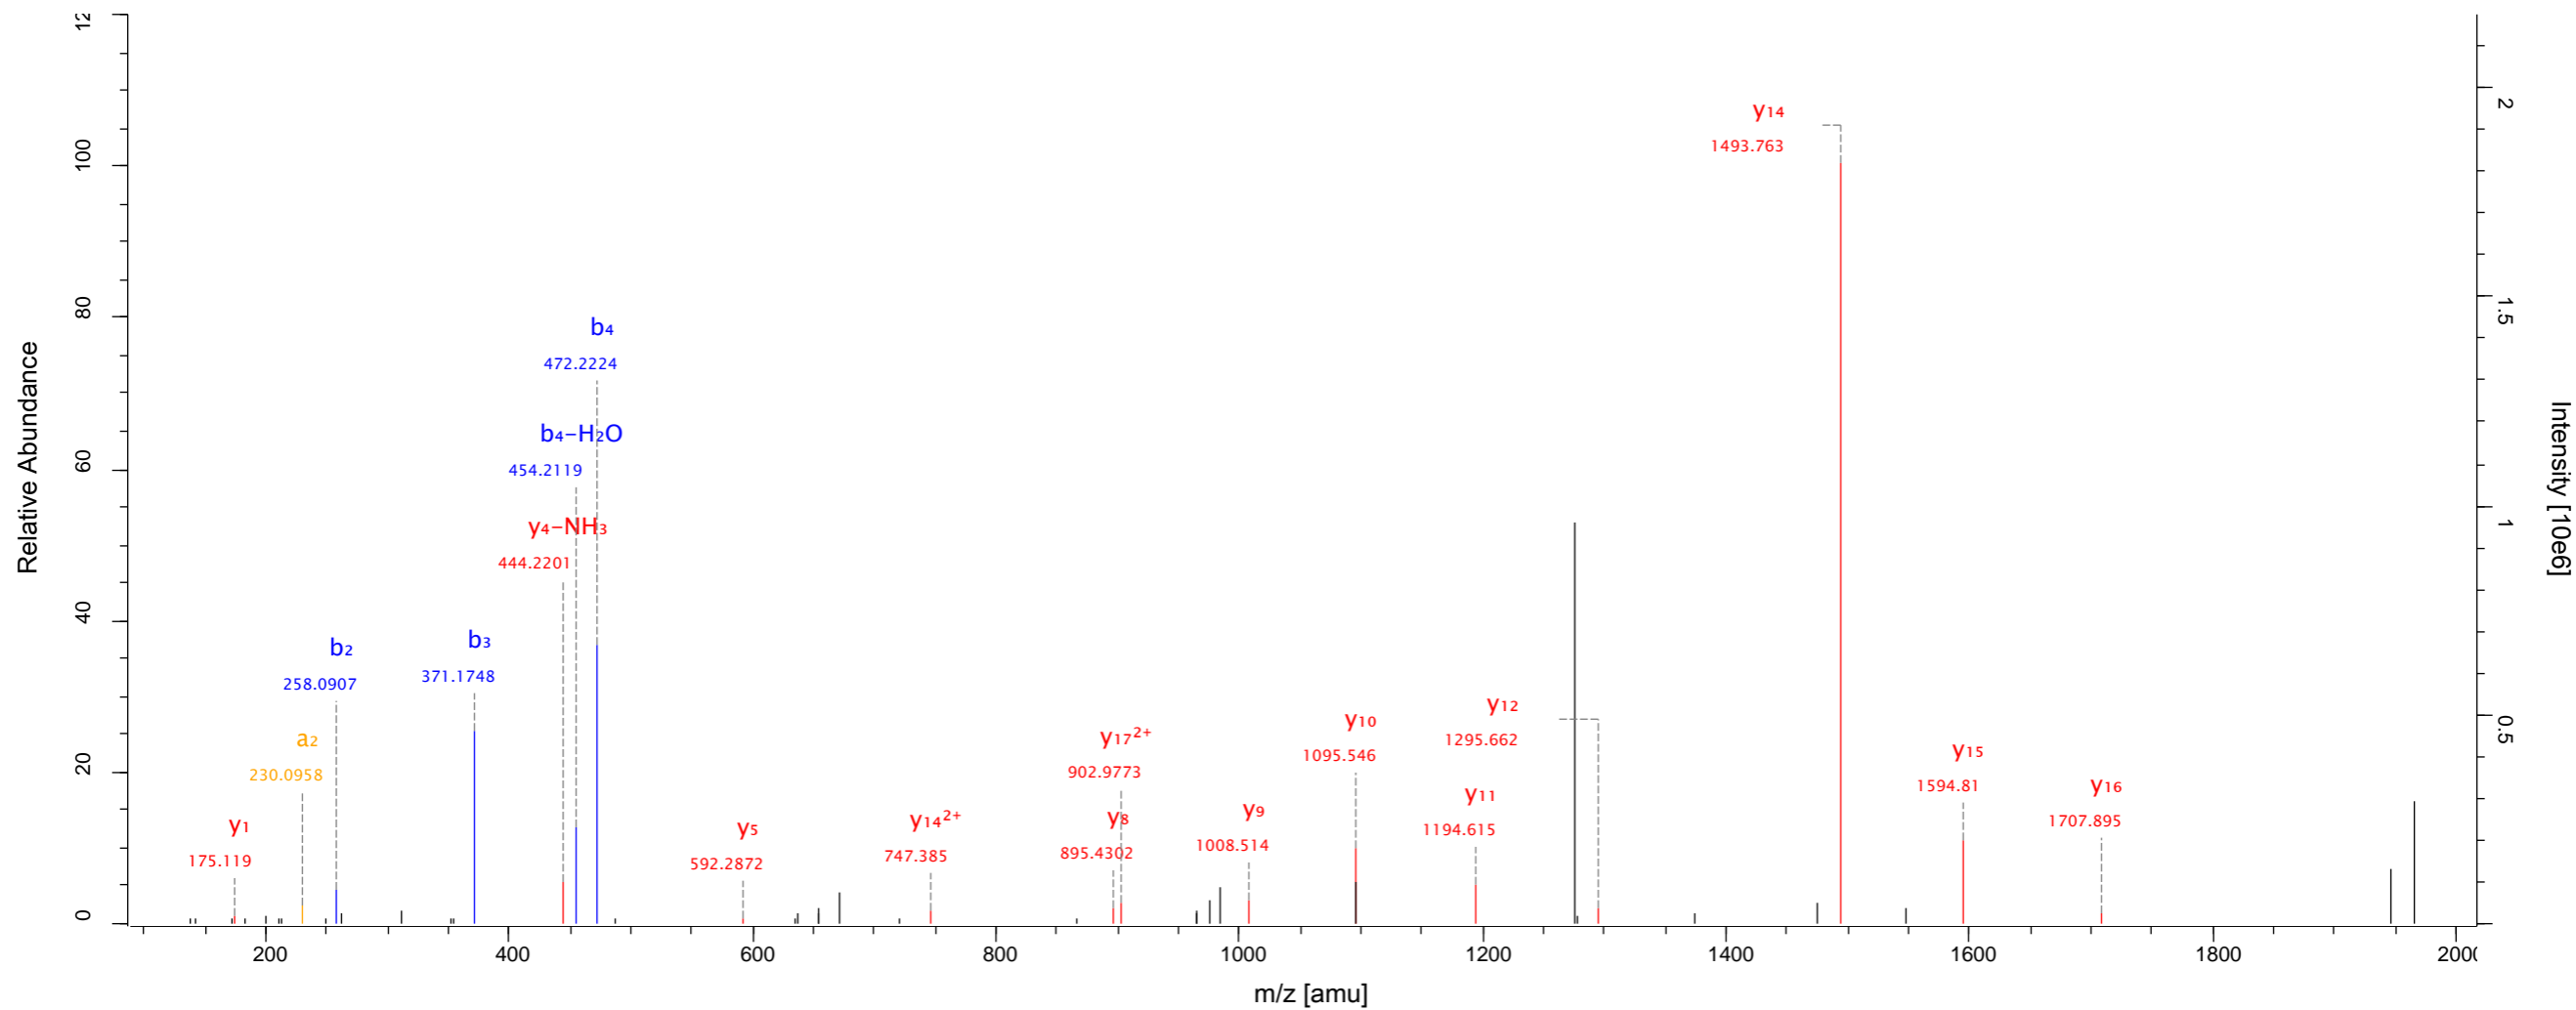

Raw file: 20111212\_EXQ5\_AnMi\_QC\_HCMVp1\_35  
Scan number: 36886  
Protein: ORFL174C.iORF2 - NC\_006273.2[106396,106770]- <unknown description>  
Peptide score: 86.76  
Method: FTMS; HCD

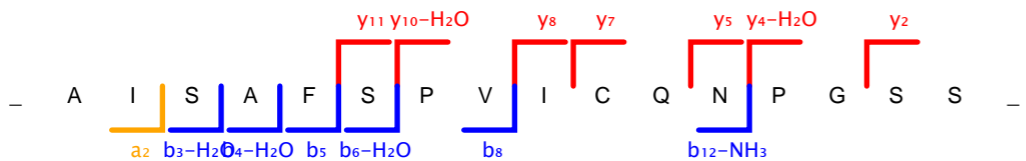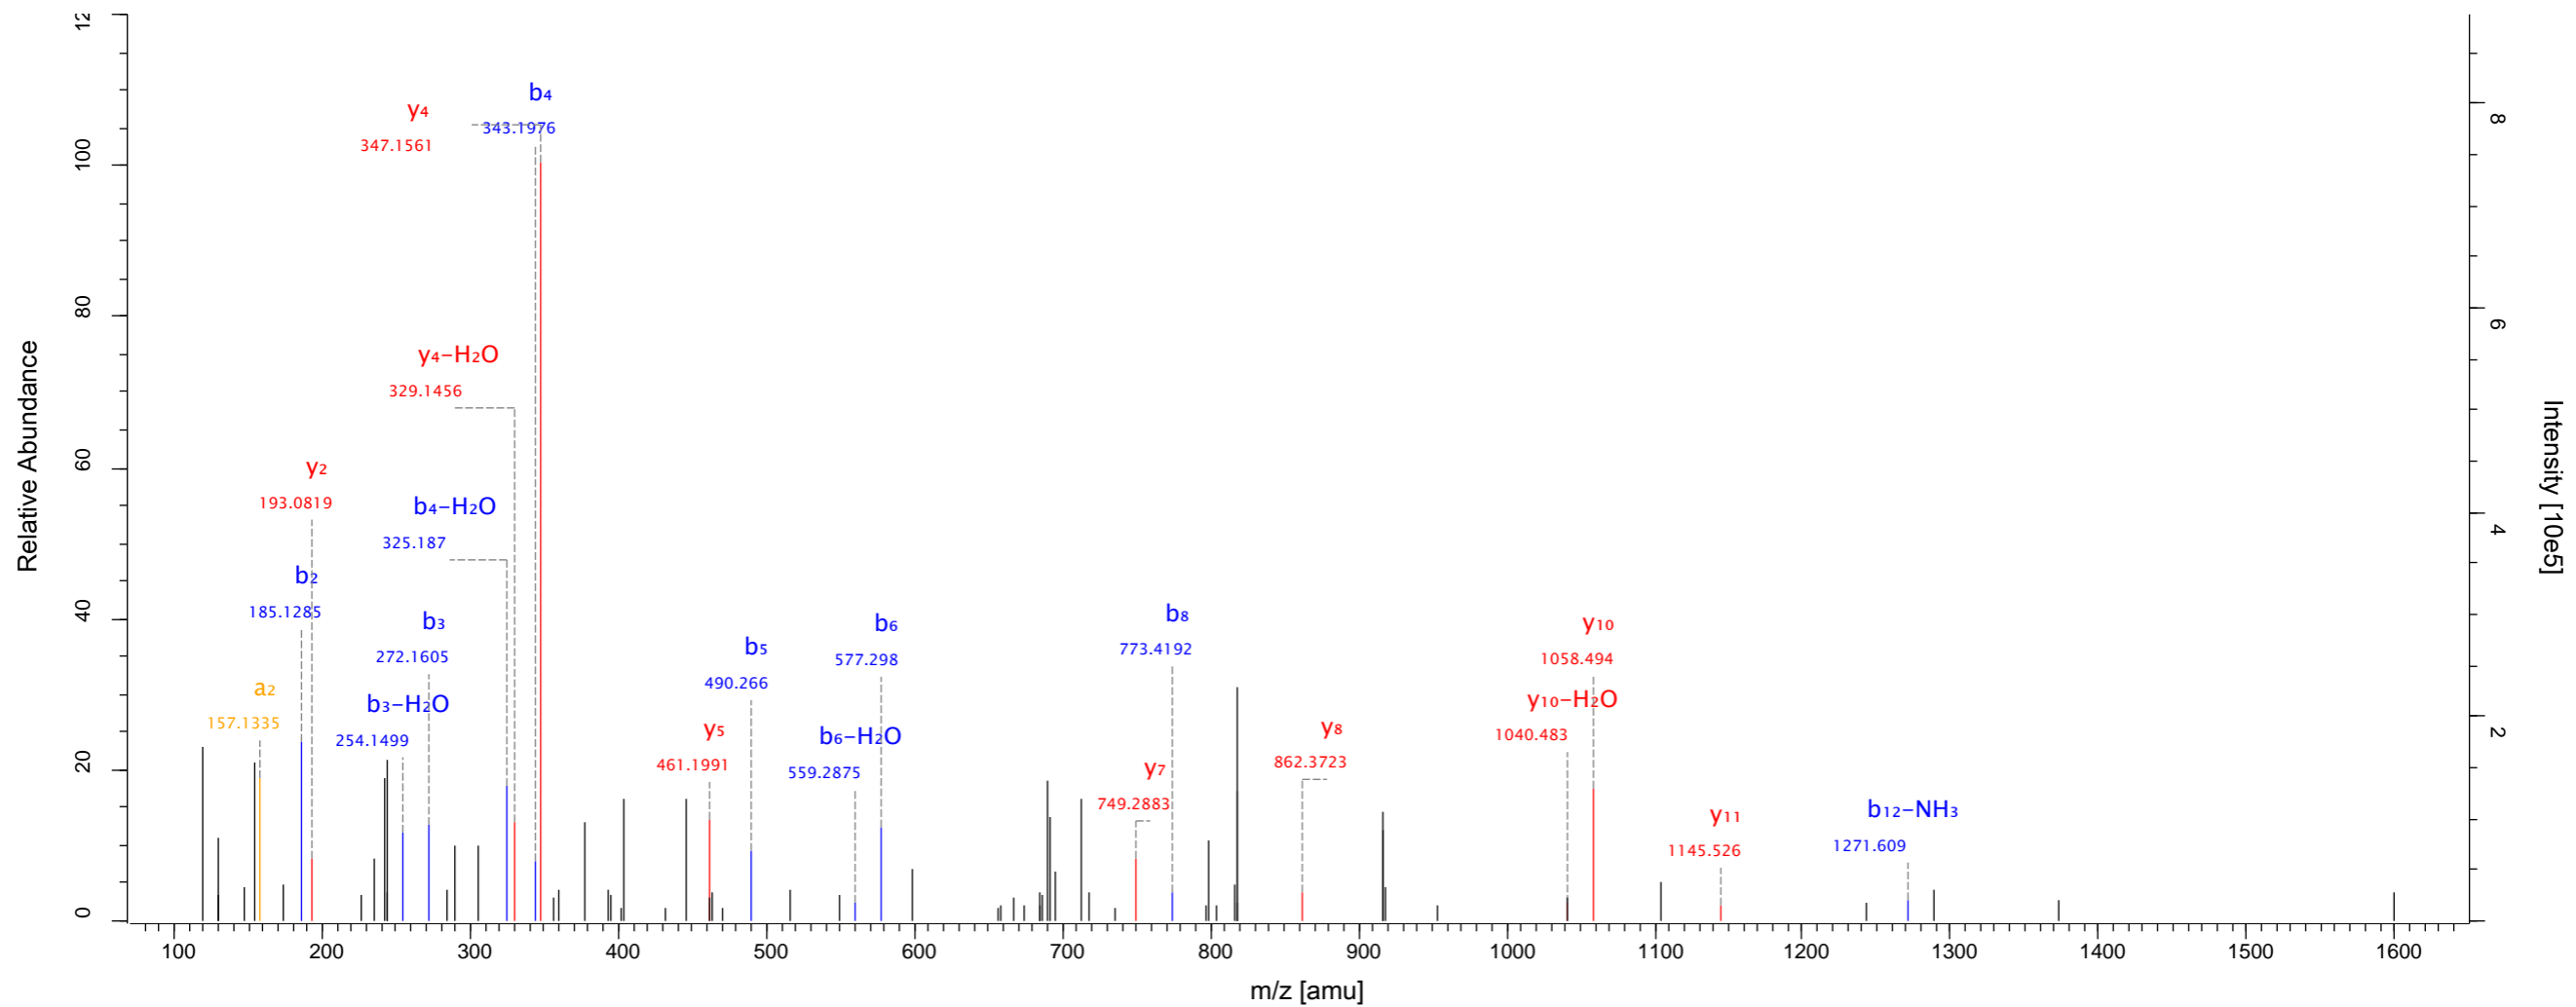

Raw file: 20111212\_EXQ5\_AnMi\_QC\_HCMVp1\_35  
Scan number: 47902  
Protein: ORFL118C - NC\_006273.2[61896,62396]- <unknown description>  
Peptide score: 198.31  
Method: FTMS; HCD

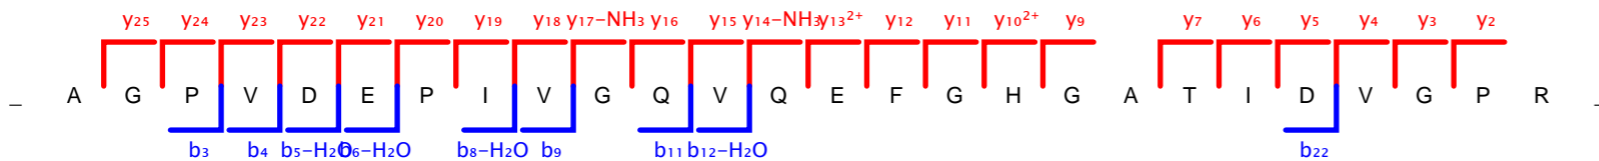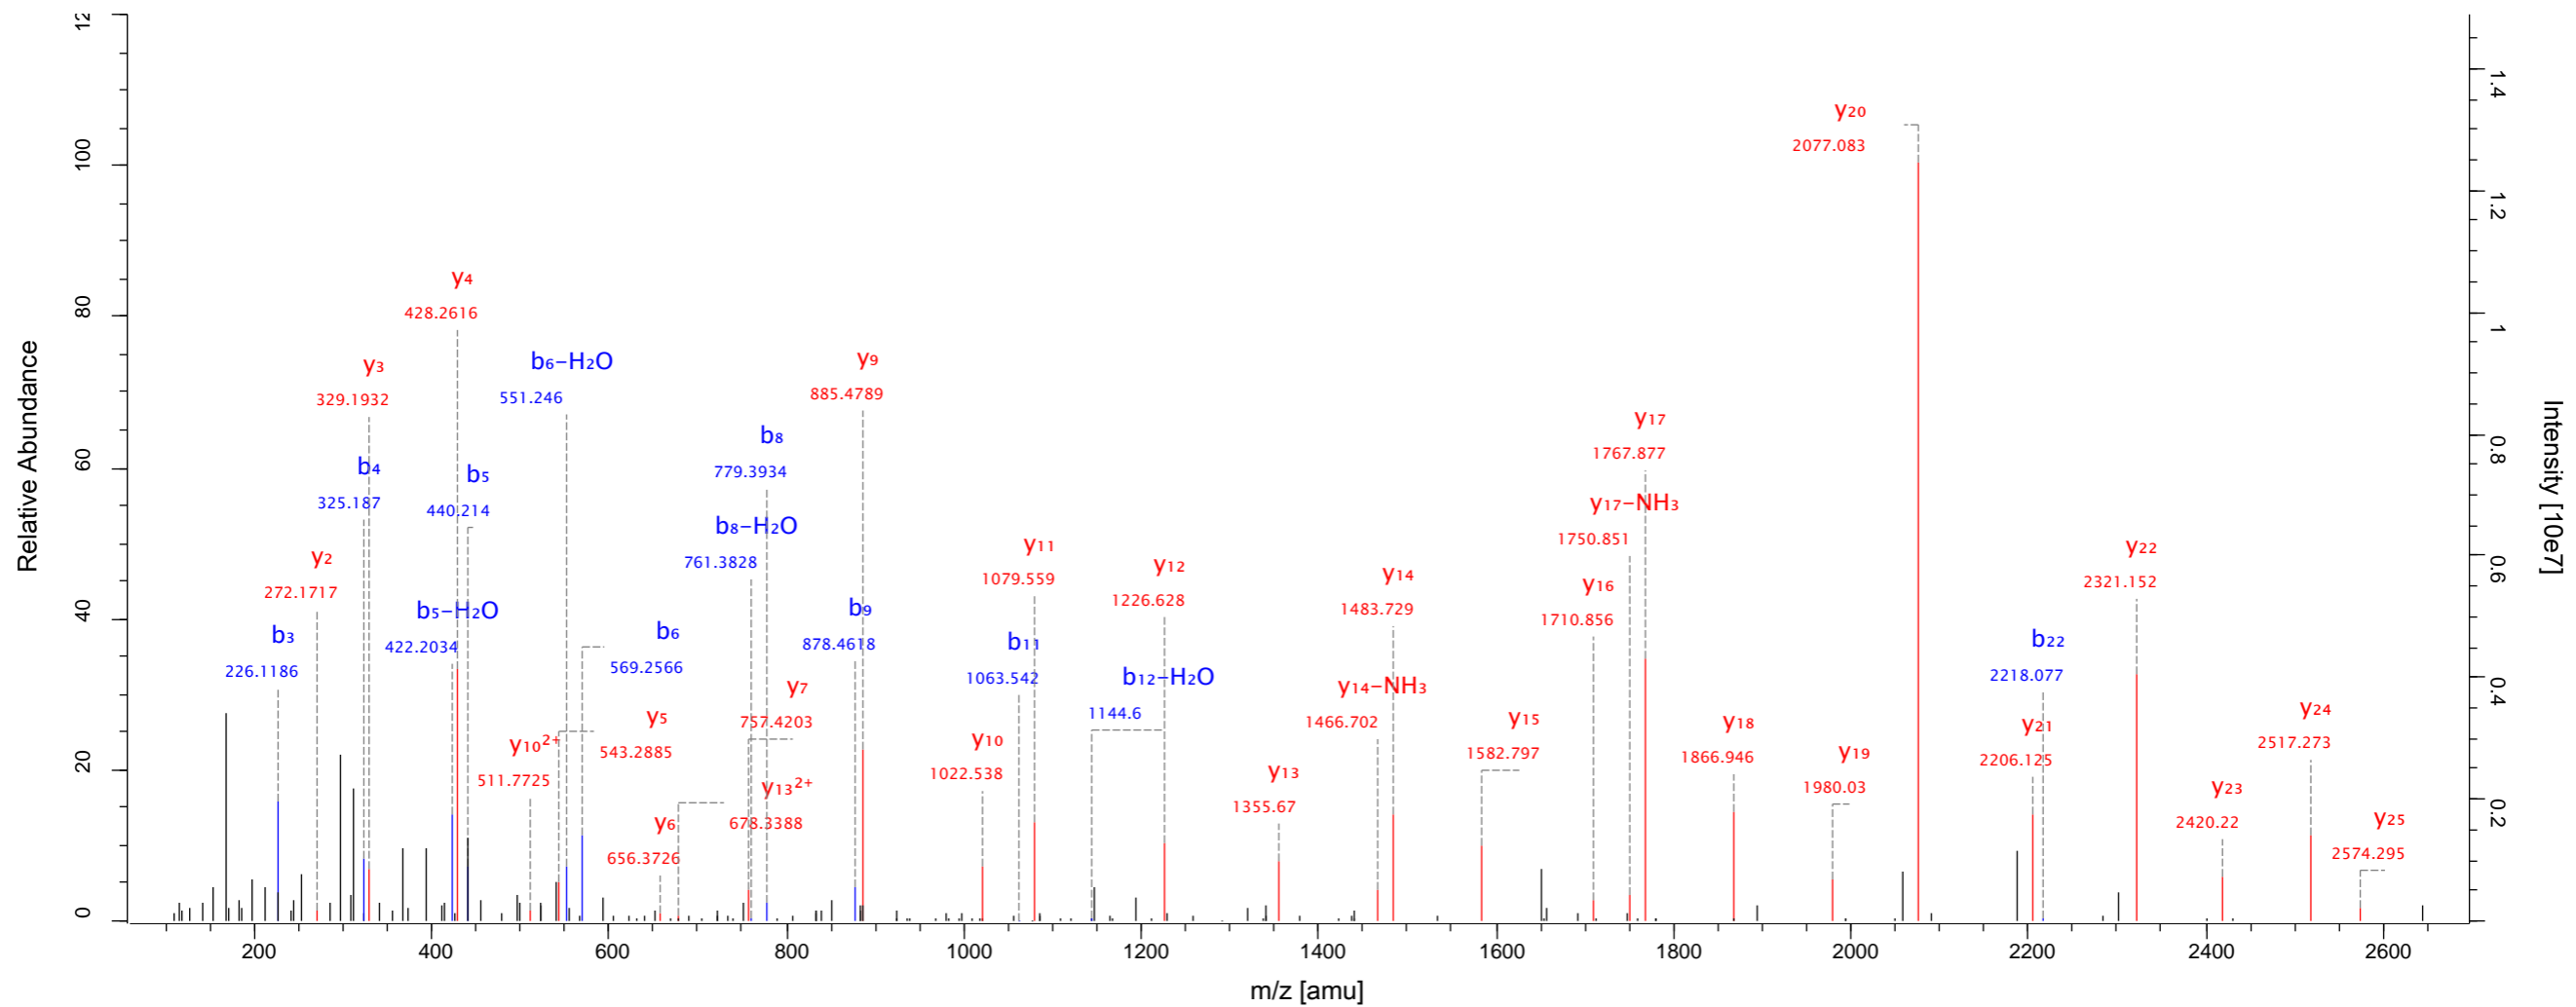

Raw file: 20111212\_EXQ5\_AnMi\_QC\_HCMVp1\_35  
 Scan number: 49294  
 Protein: ORFL234C - NC\_006273.2[148754,149149]- <unknown description>  
 Peptide score: 220.88  
 Method: FTMS; HCD

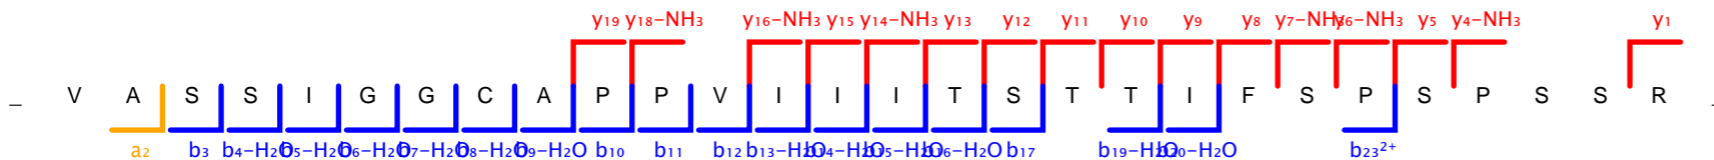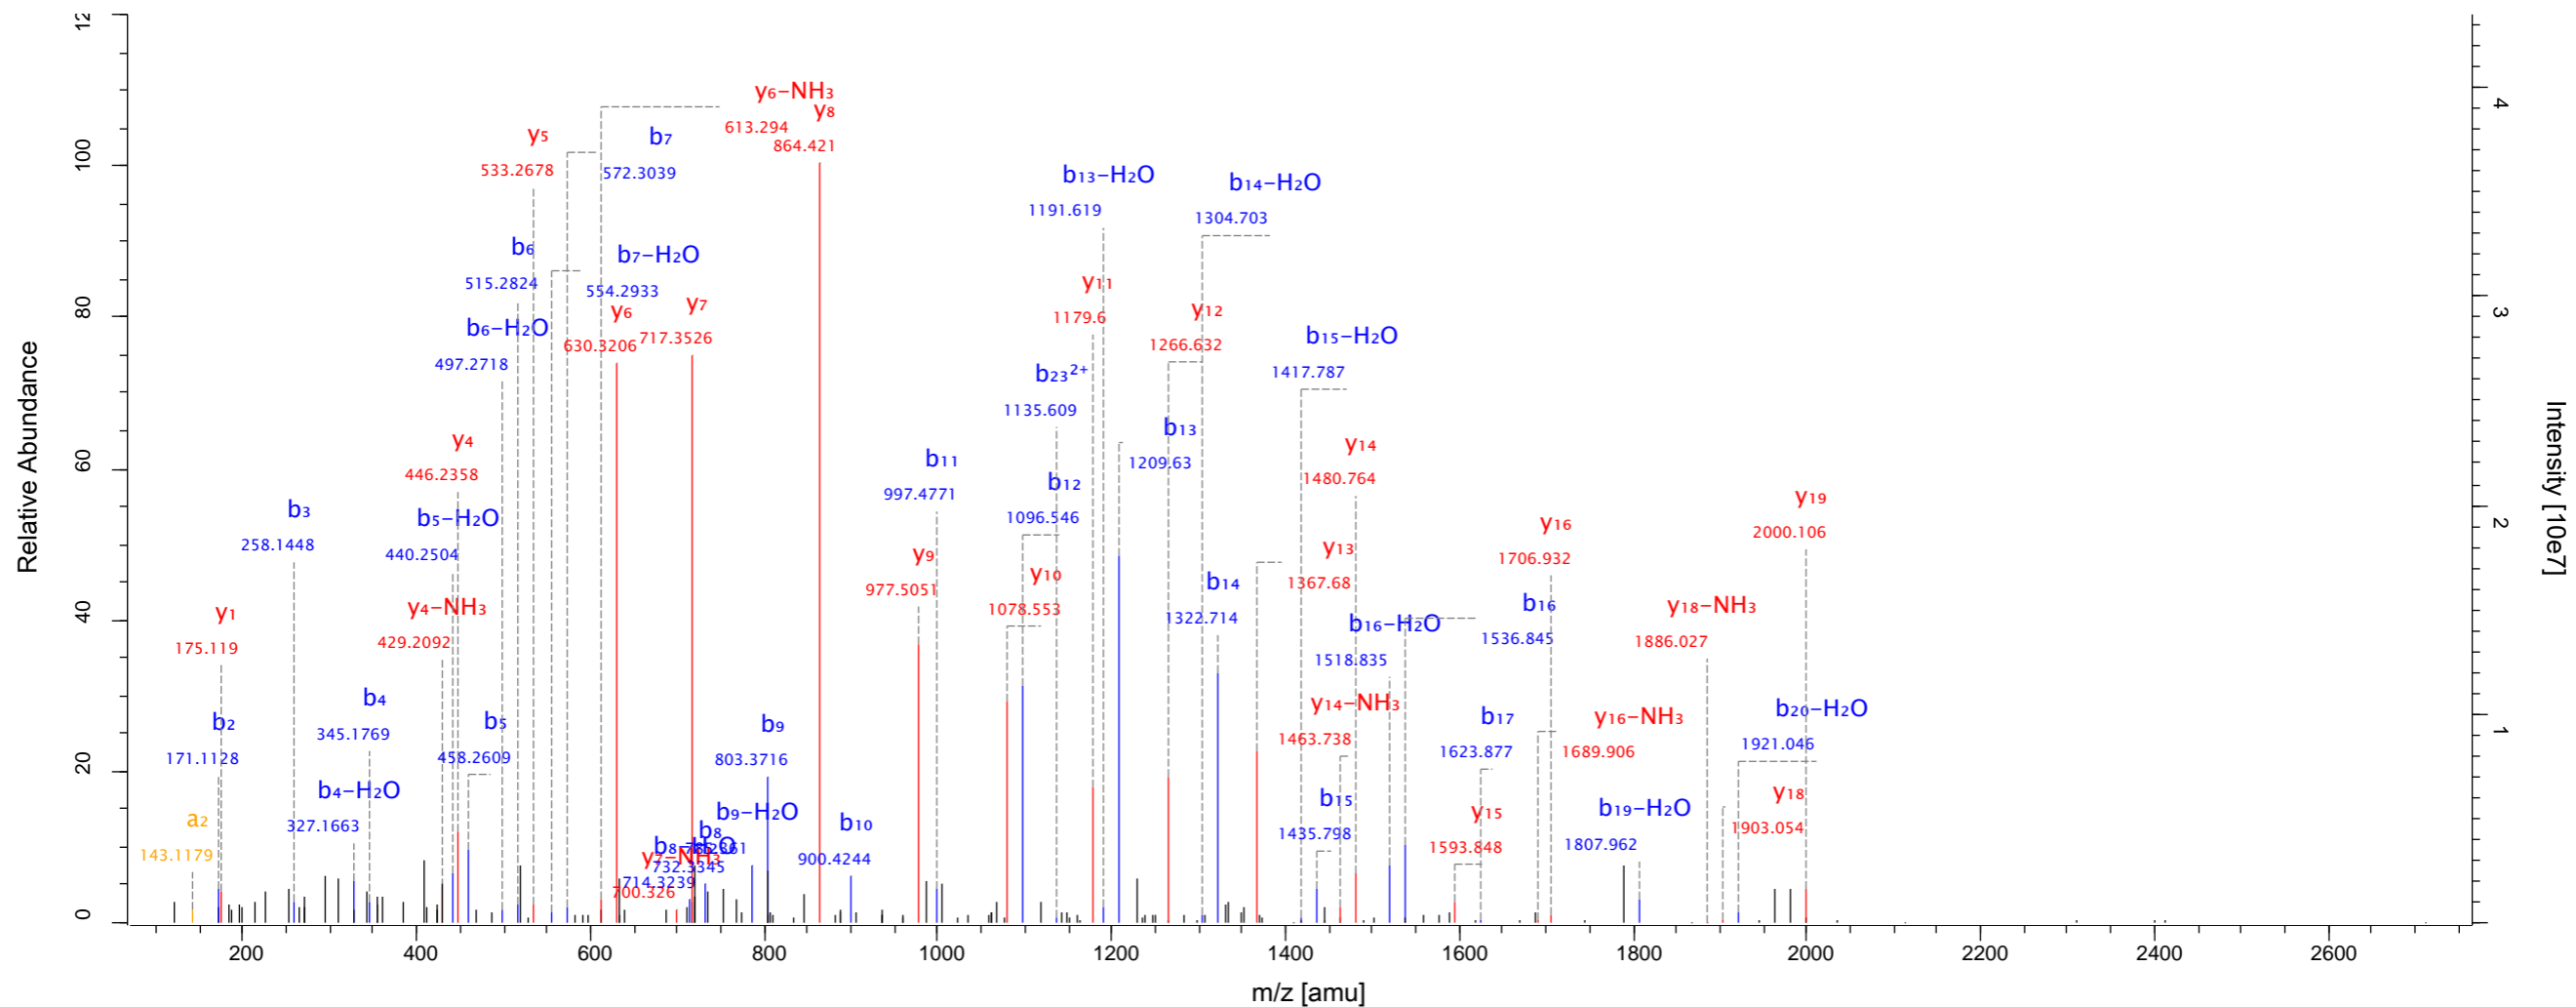

Raw file: 20111212\_EXQ5\_AnMi\_QC\_HCMVp11\_35  
Scan number: 6724  
Protein: ORFL86W + NC\_006273.2[38059,38538]+ <unknown description>  
Peptide score: 71.22  
Method: FTMS; HCD

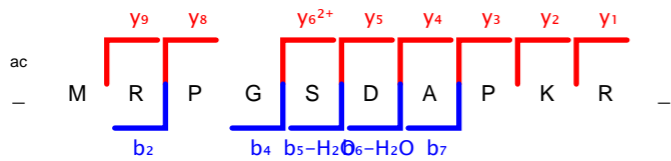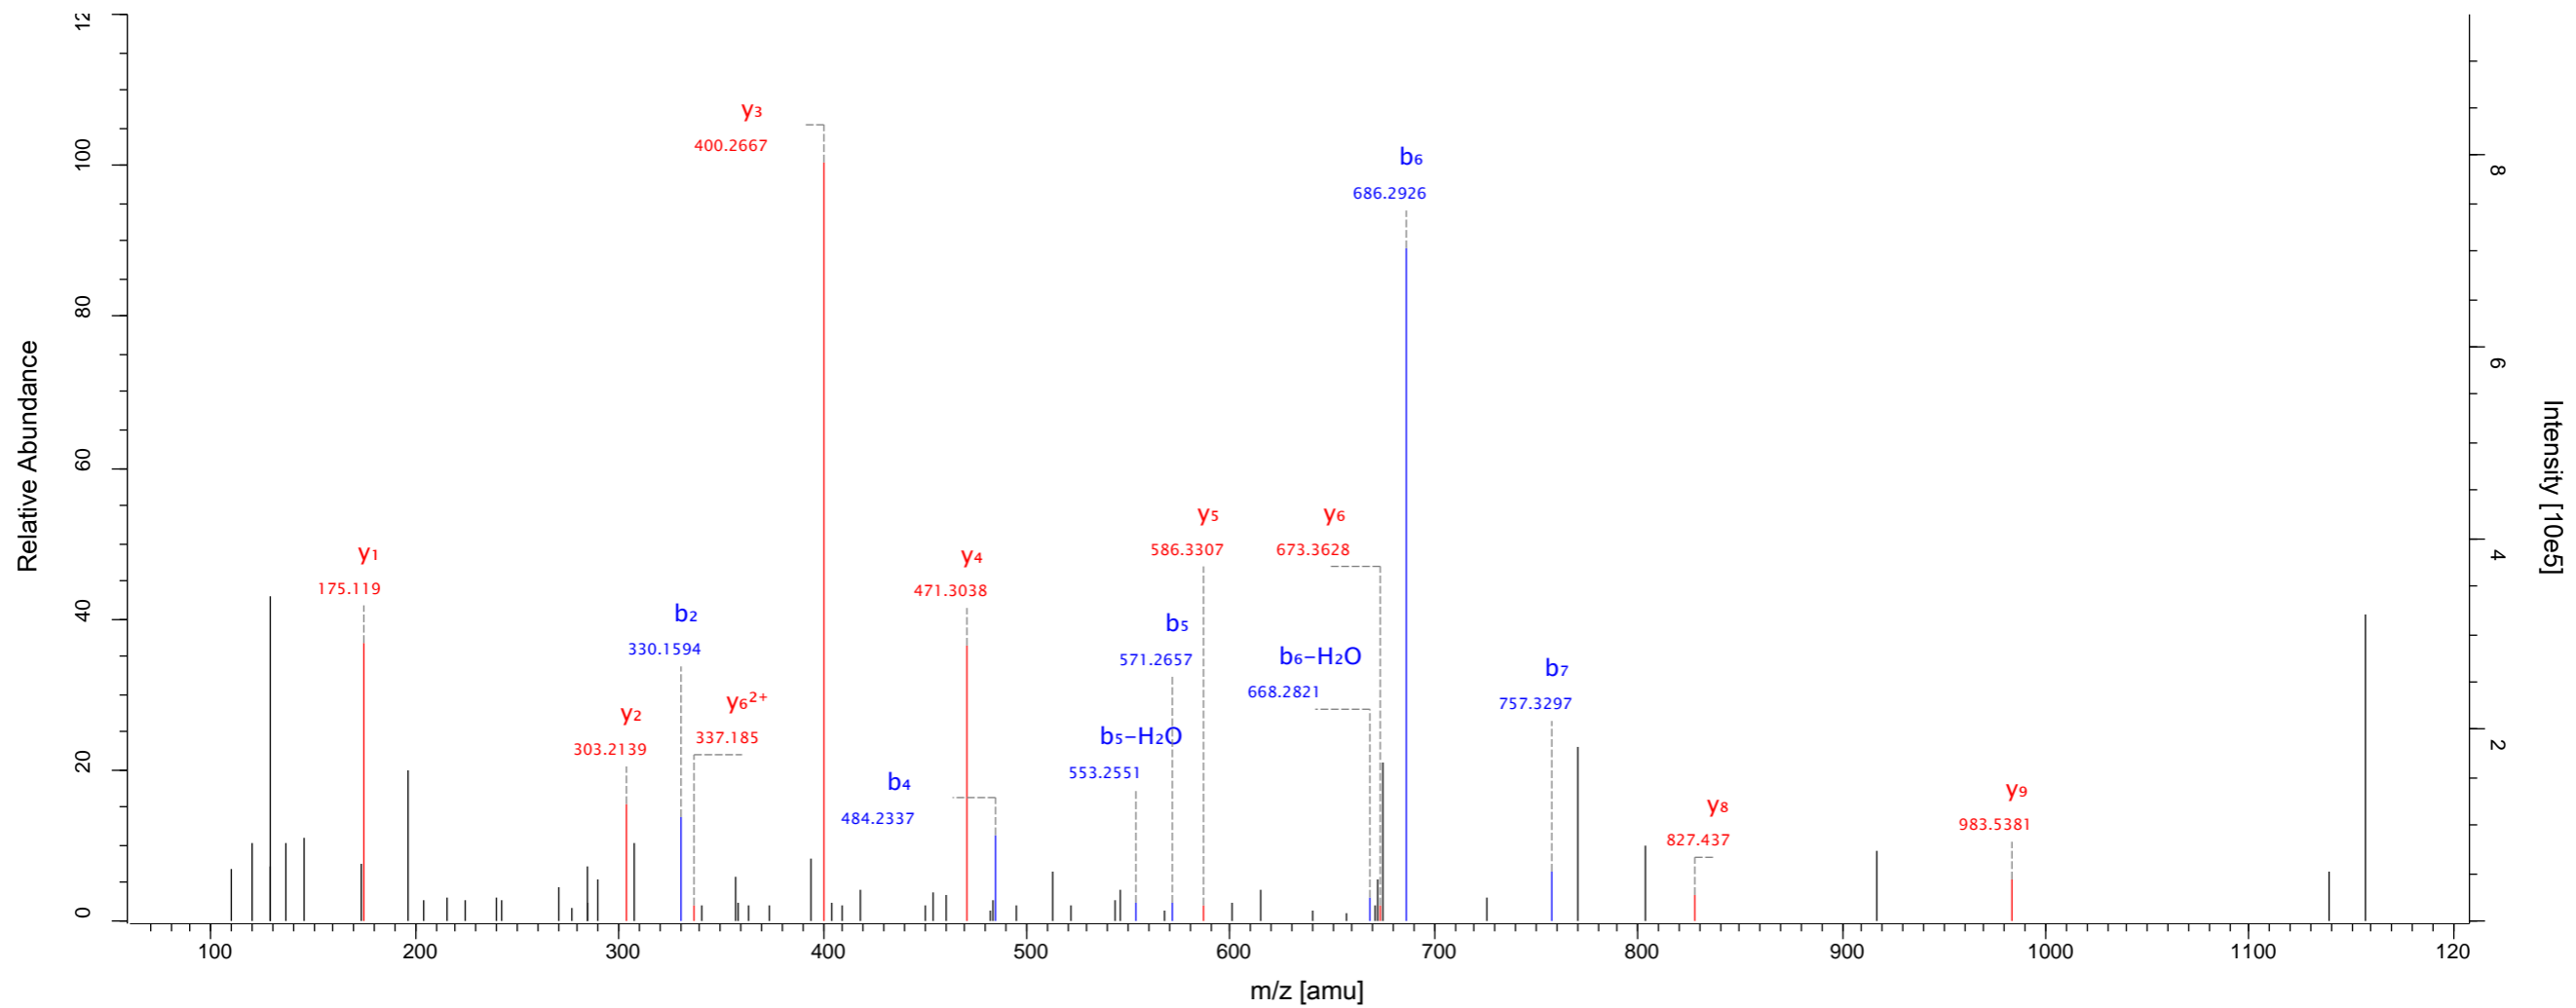

Raw file: 20111212\_EXQ5\_AnMi\_QC\_HCMVp1\_35  
Scan number: 8178  
Protein: ORFL86W + NC\_006273.2[38059,38538]+ <unknown description>  
Peptide score: 64.48  
Method: FTMS; HCD

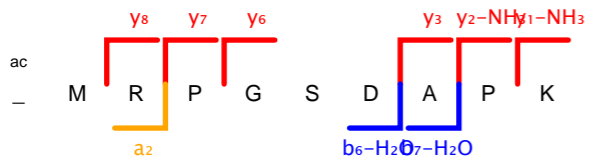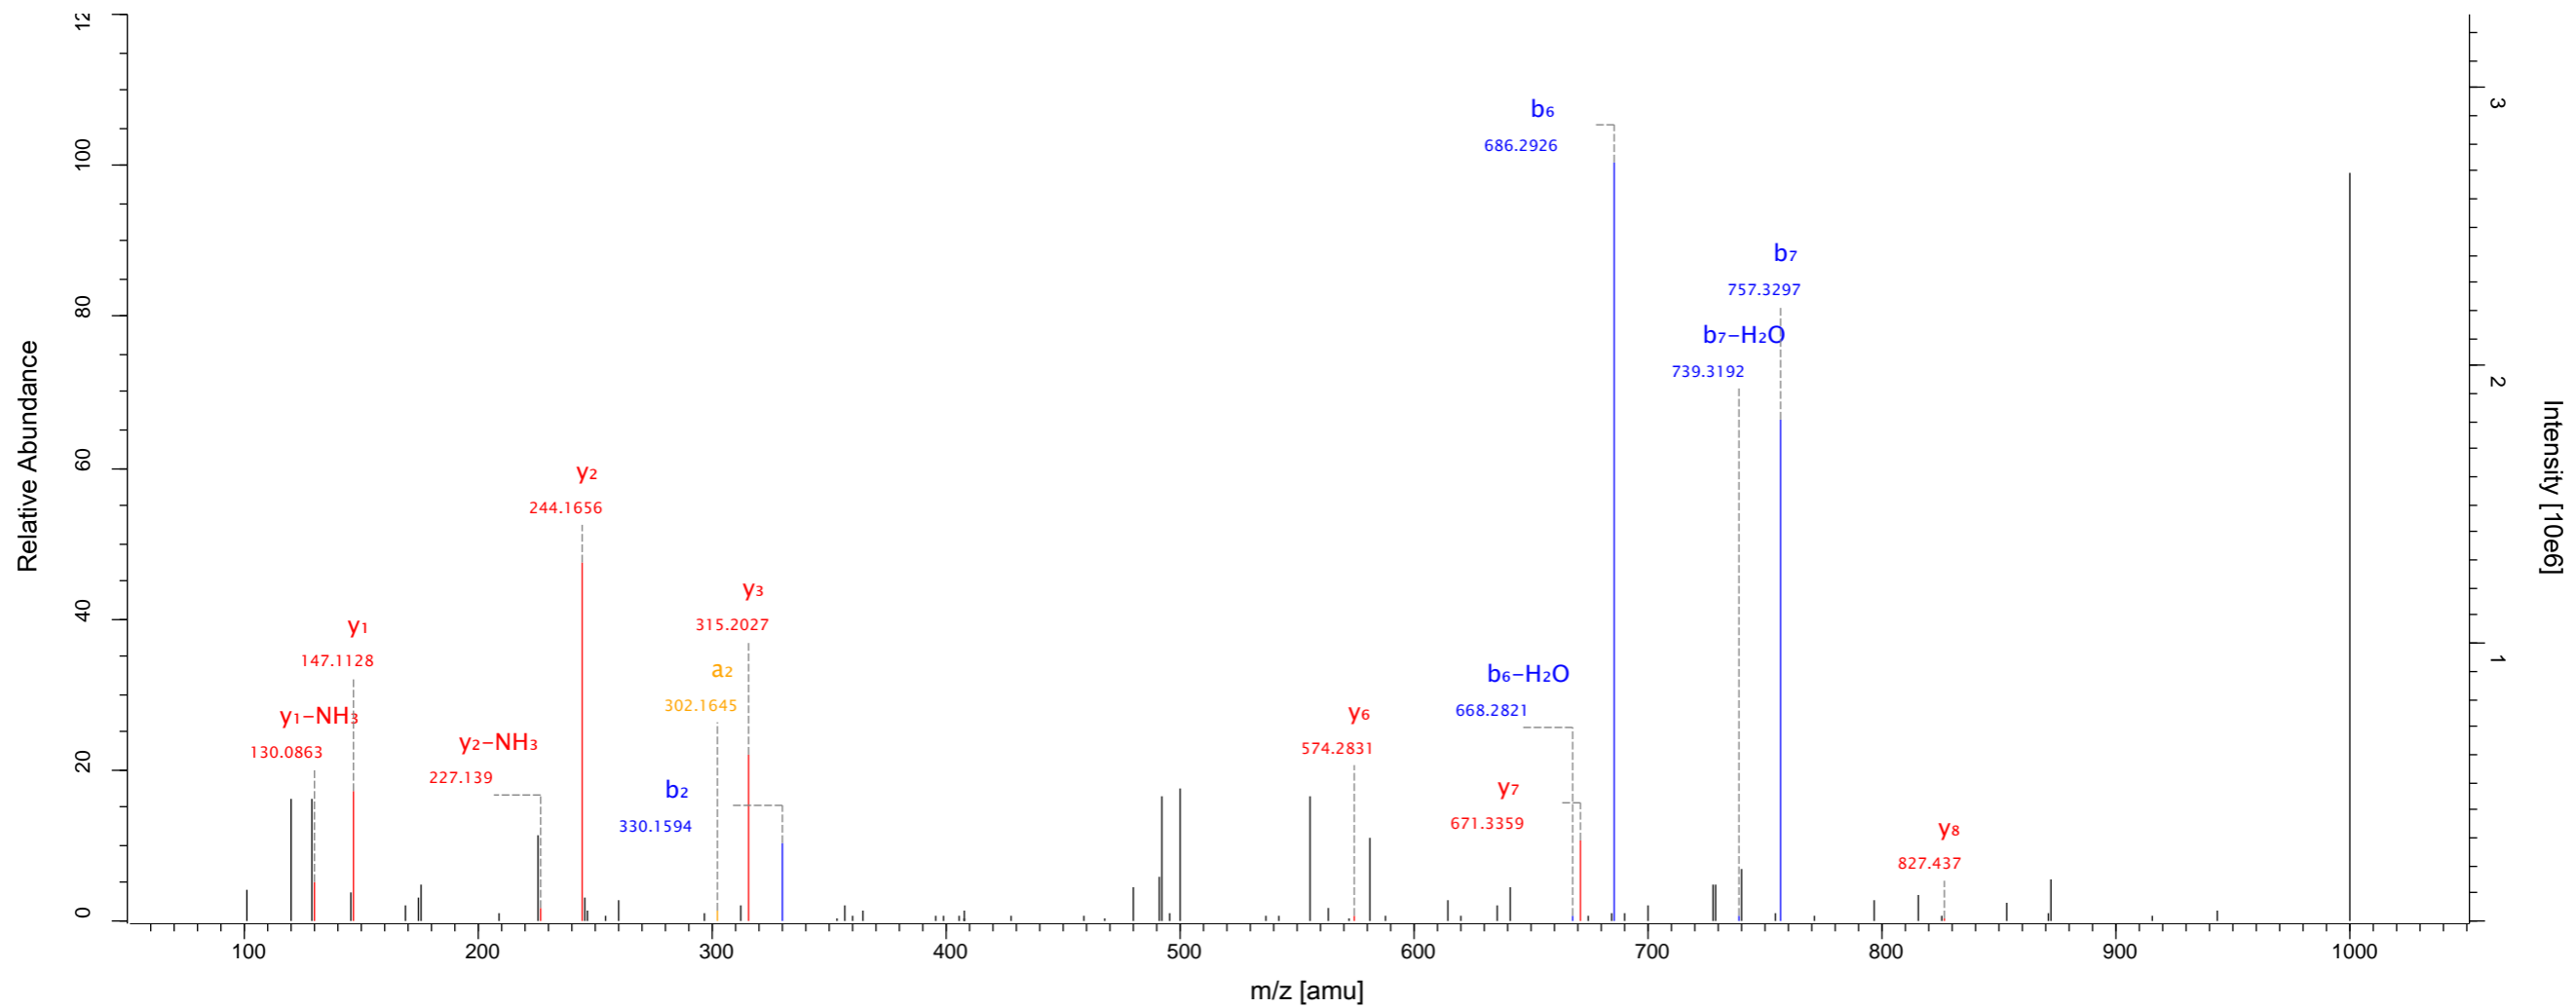

Raw file: 20111212\_EXQ5\_AnMi\_QC\_HCMVp1\_35  
Scan number: 8489  
Protein: ORFL86W + NC\_006273.2[38059,38538]+ <unknown description>  
Peptide score: 75.46  
Method: FTMS; HCD

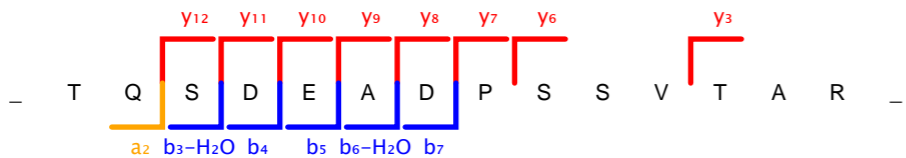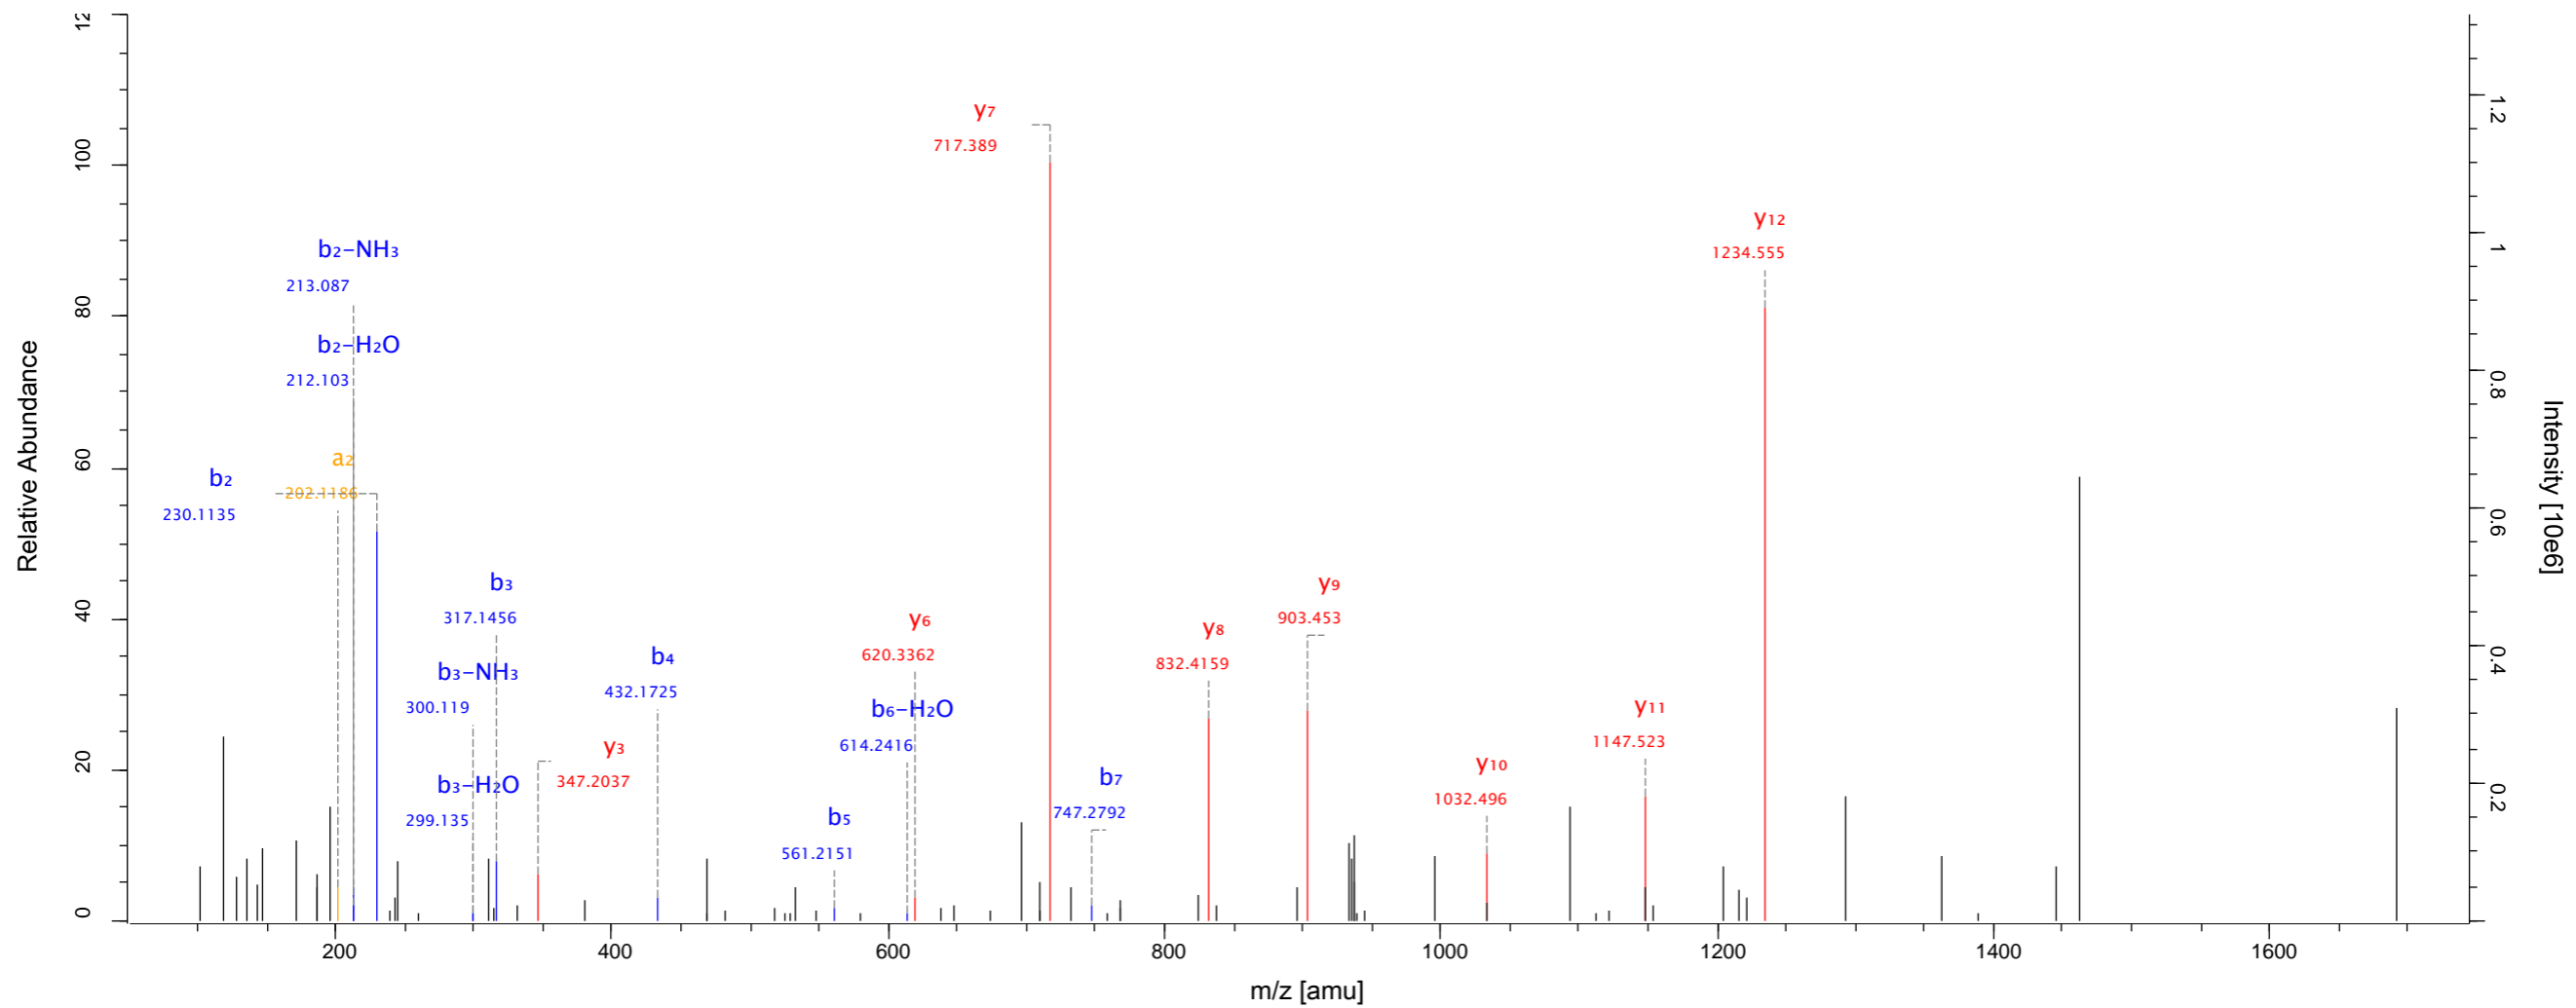

Raw file: 20111212\_EXQ5\_AnMi\_QC\_HCMVp1\_35  
 Scan number: 8840  
 Protein: ORFL86W + NC\_006273.2[38059,38538]+ <unknown description>  
 Peptide score: 133.96  
 Method: FTMS; HCD

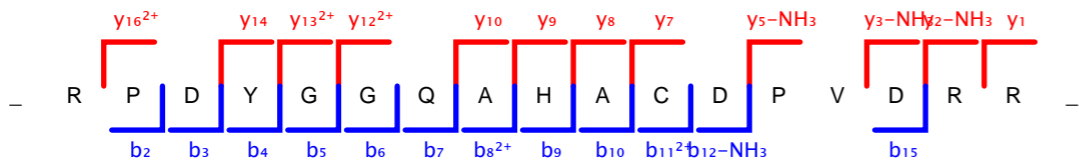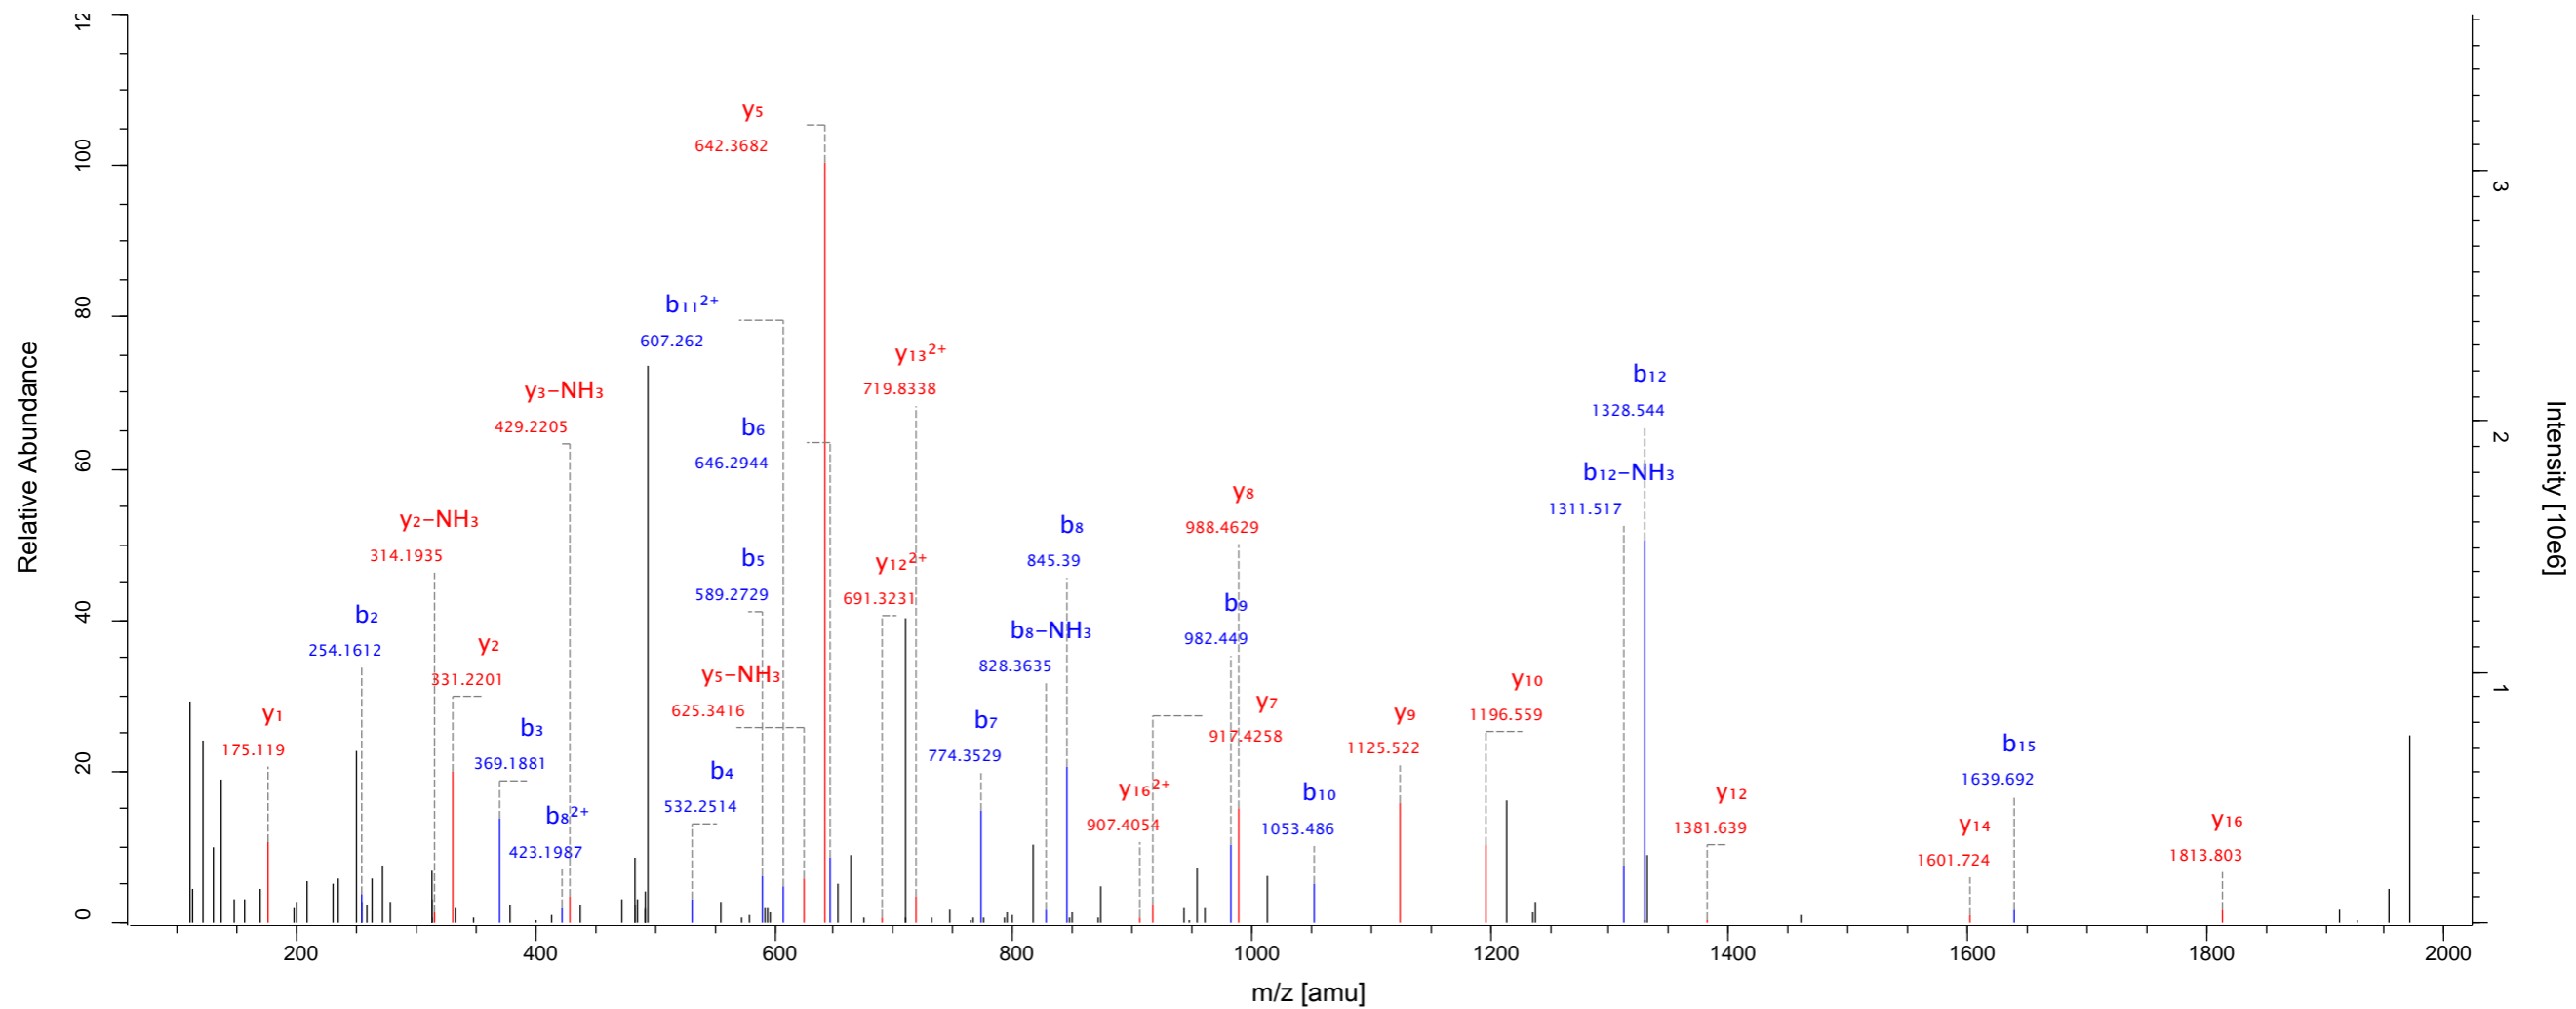



Raw file: 20111212\_EXQ5\_AnMi\_QC\_HCMVp1\_35  
Scan number: 9417  
Protein: ORFL234C - NC\_006273.2[148754,149149]- <unknown description>  
Peptide score: 55.08  
Method: FTMS; HCD

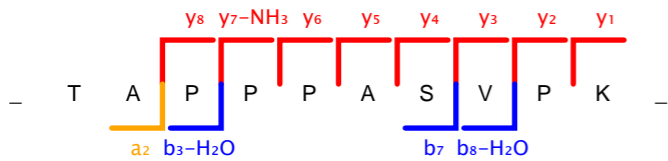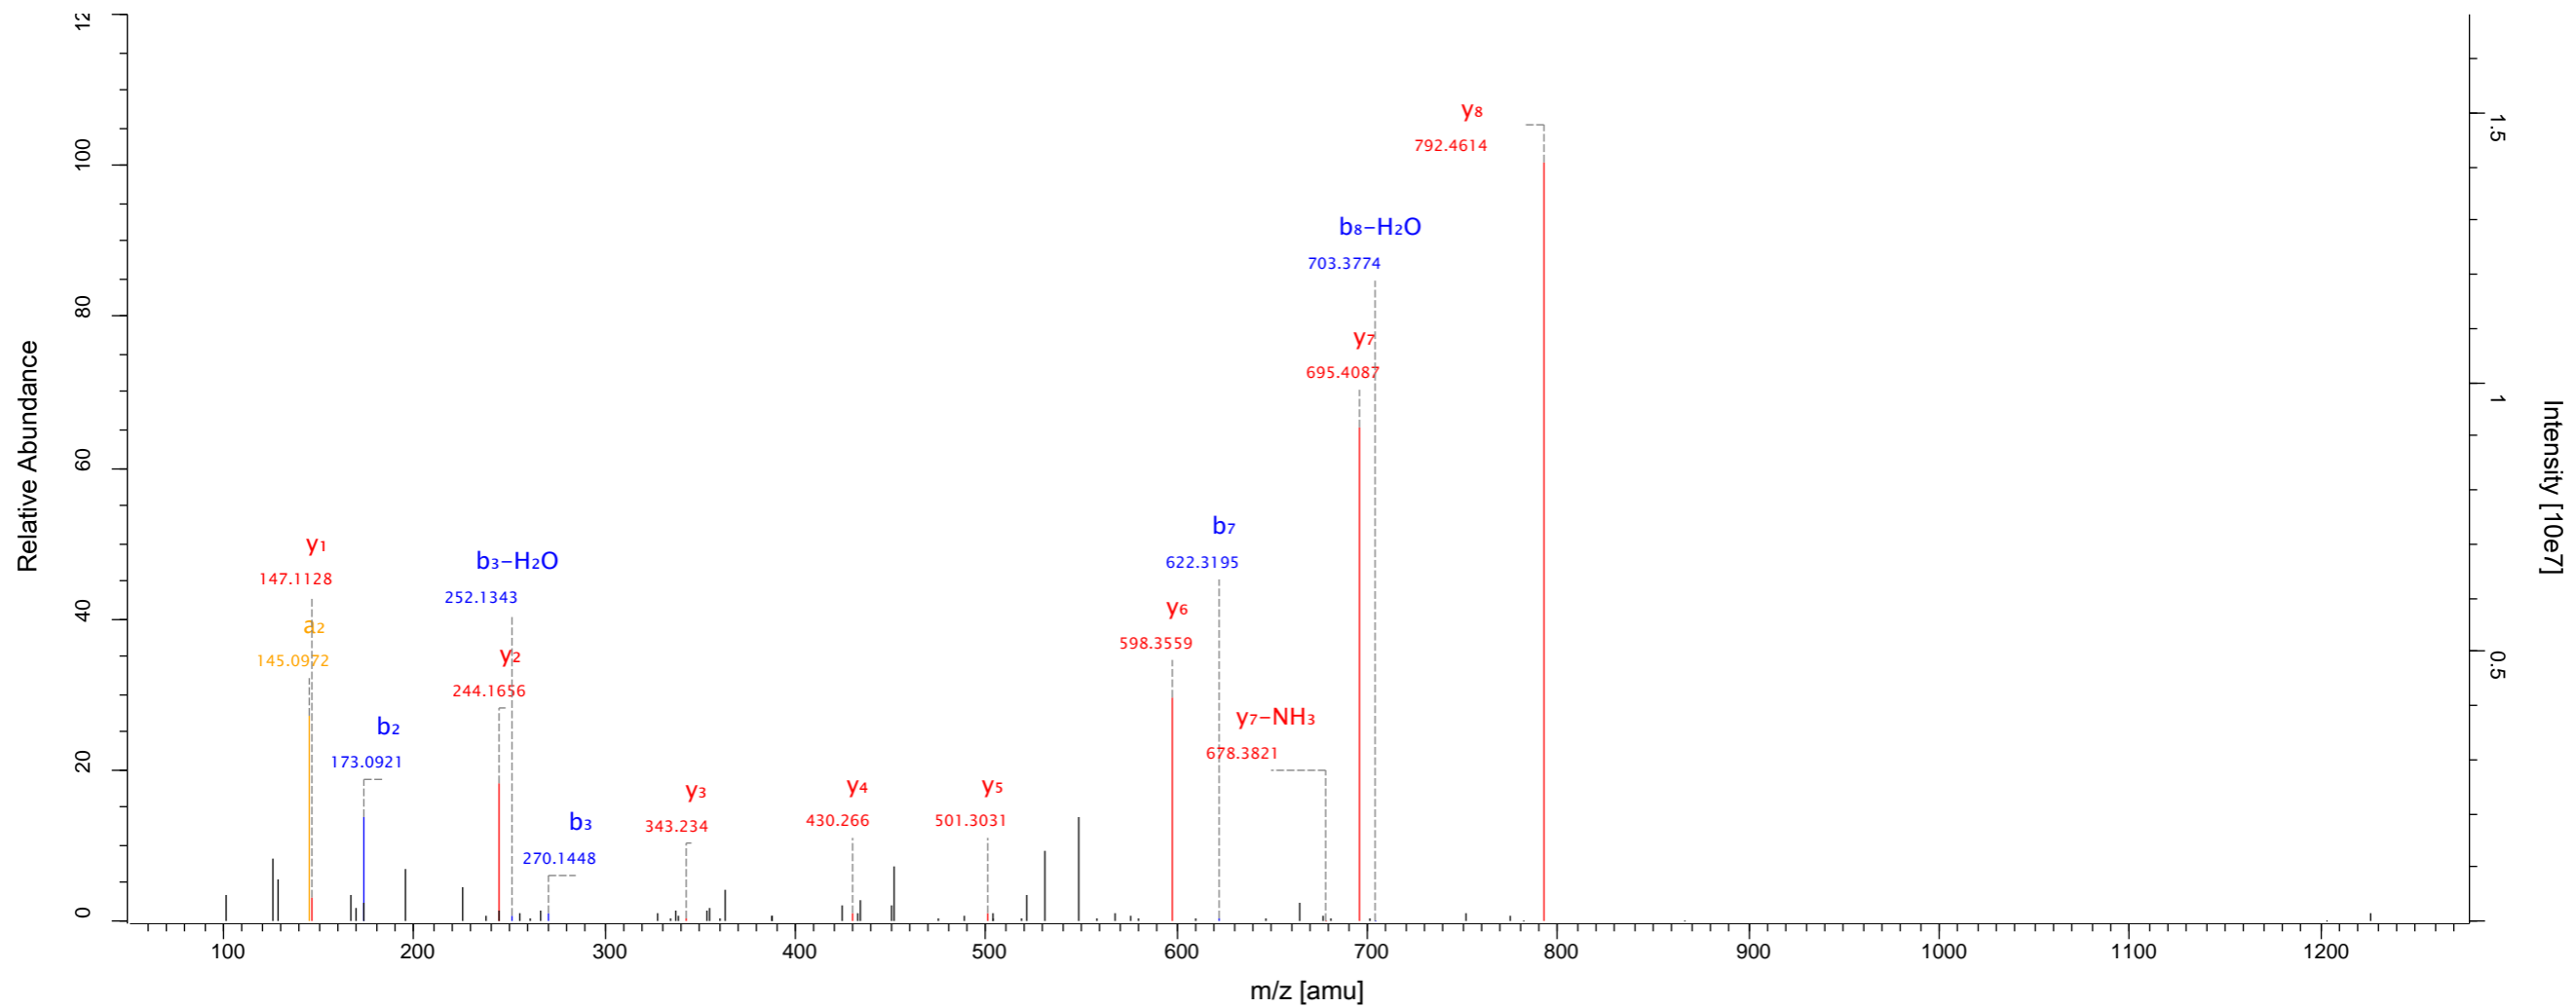

Raw file: 20111212\_EXQ5\_AnMi\_QC\_HCMVp11\_35  
Scan number: 9876  
Protein: ORFL161C.iORF2 - NC\_006273.2[101063,101479]- <unknown description>  
Peptide score: 104.21  
Method: FTMS; HCD

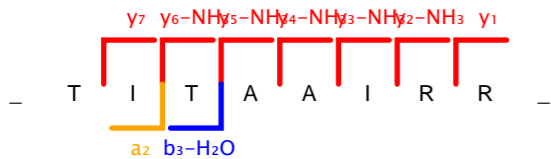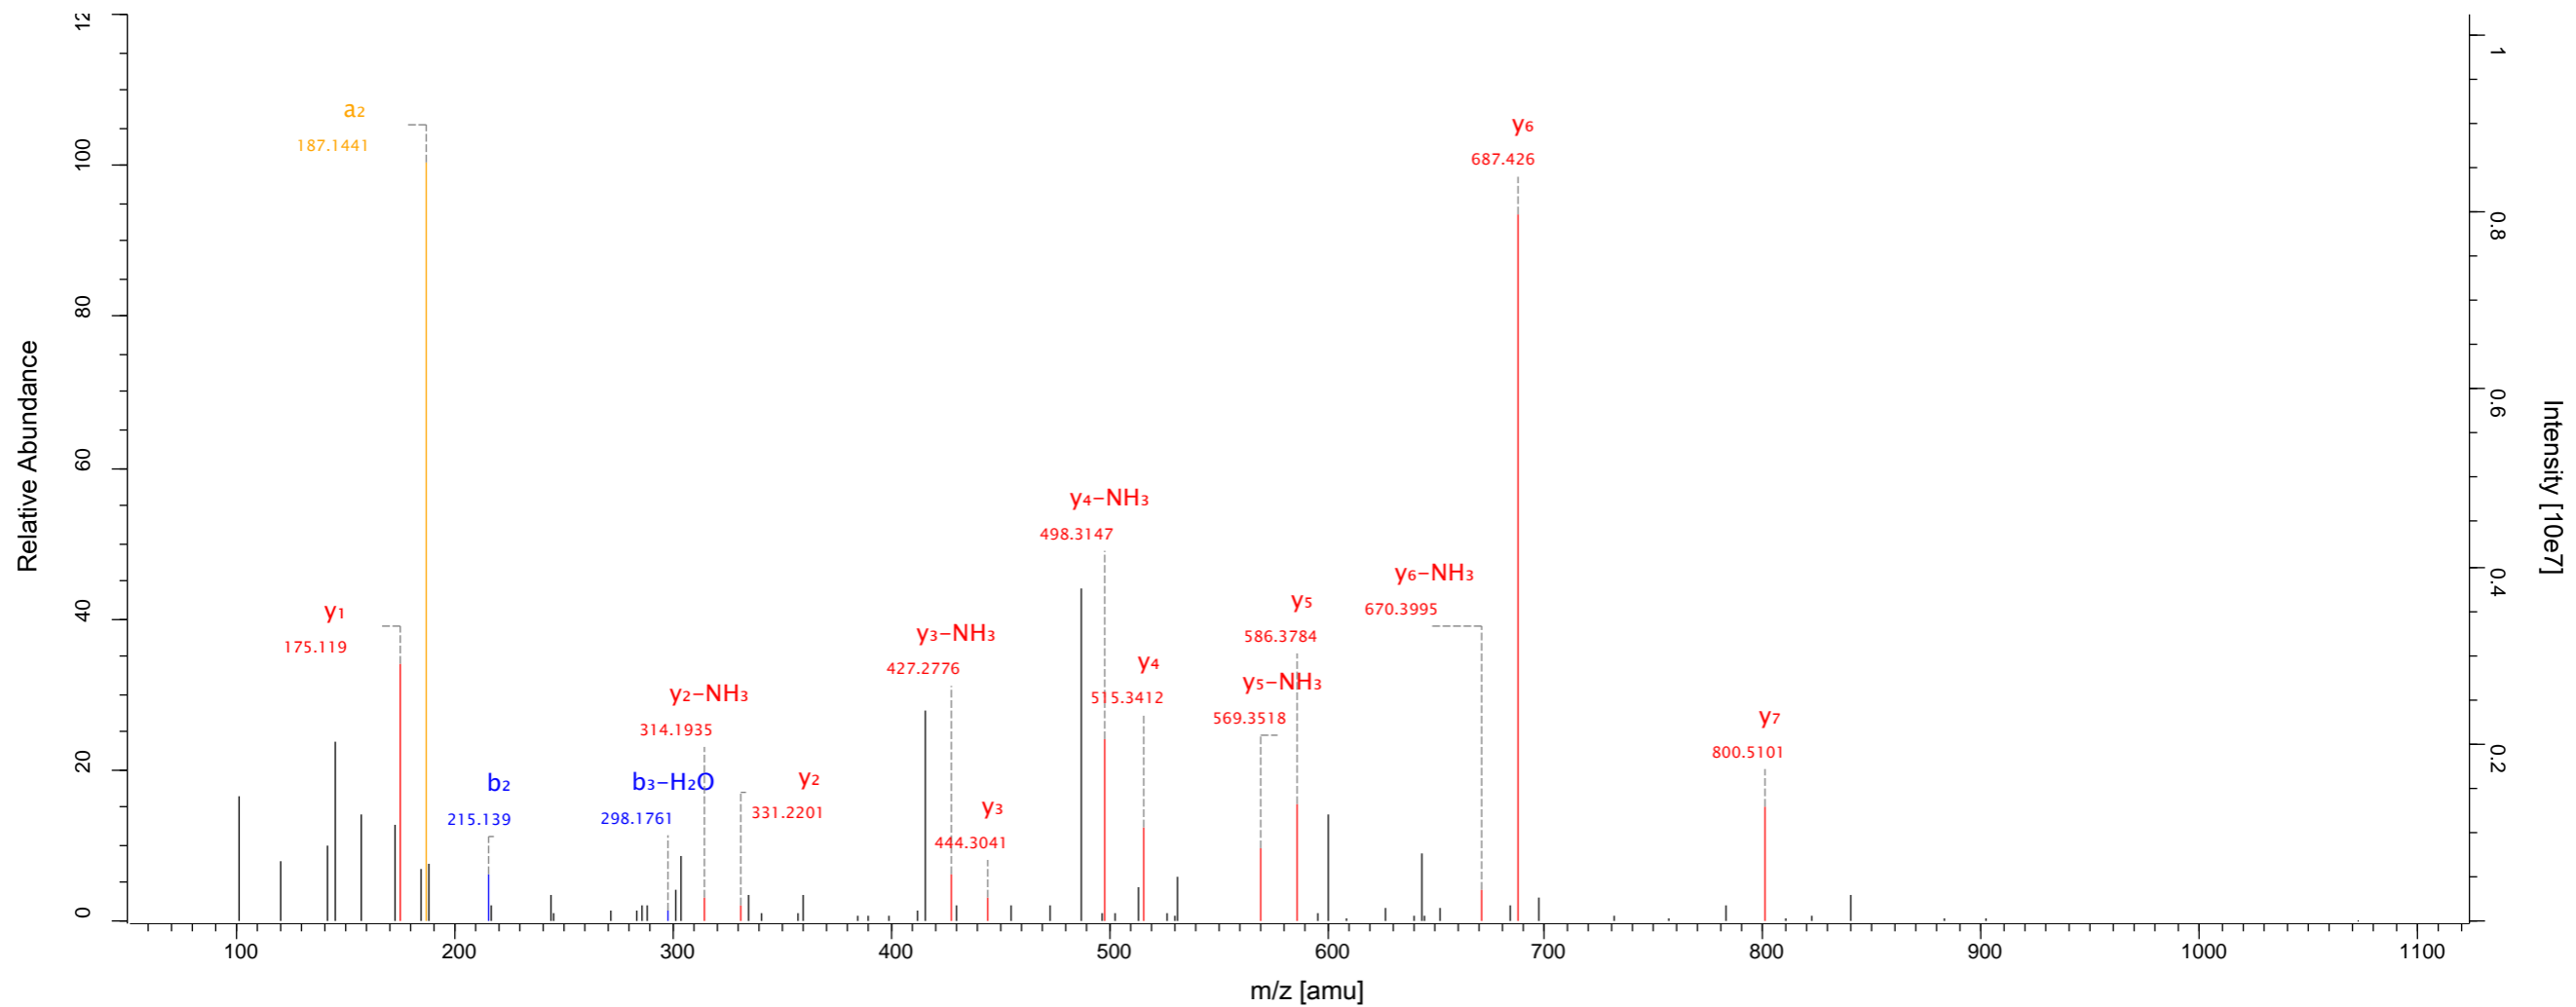

Raw file: 20111212\_EXQ5\_AnMi\_QC\_HCMVp1\_36  
Scan number: 10651  
Protein: ORFL299W + NC\_006273.2[185047,185685]+ <unknown description>  
Peptide score: 87.15  
Method: FTMS; HCD

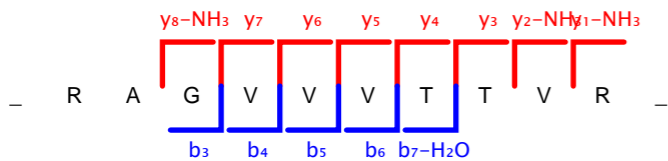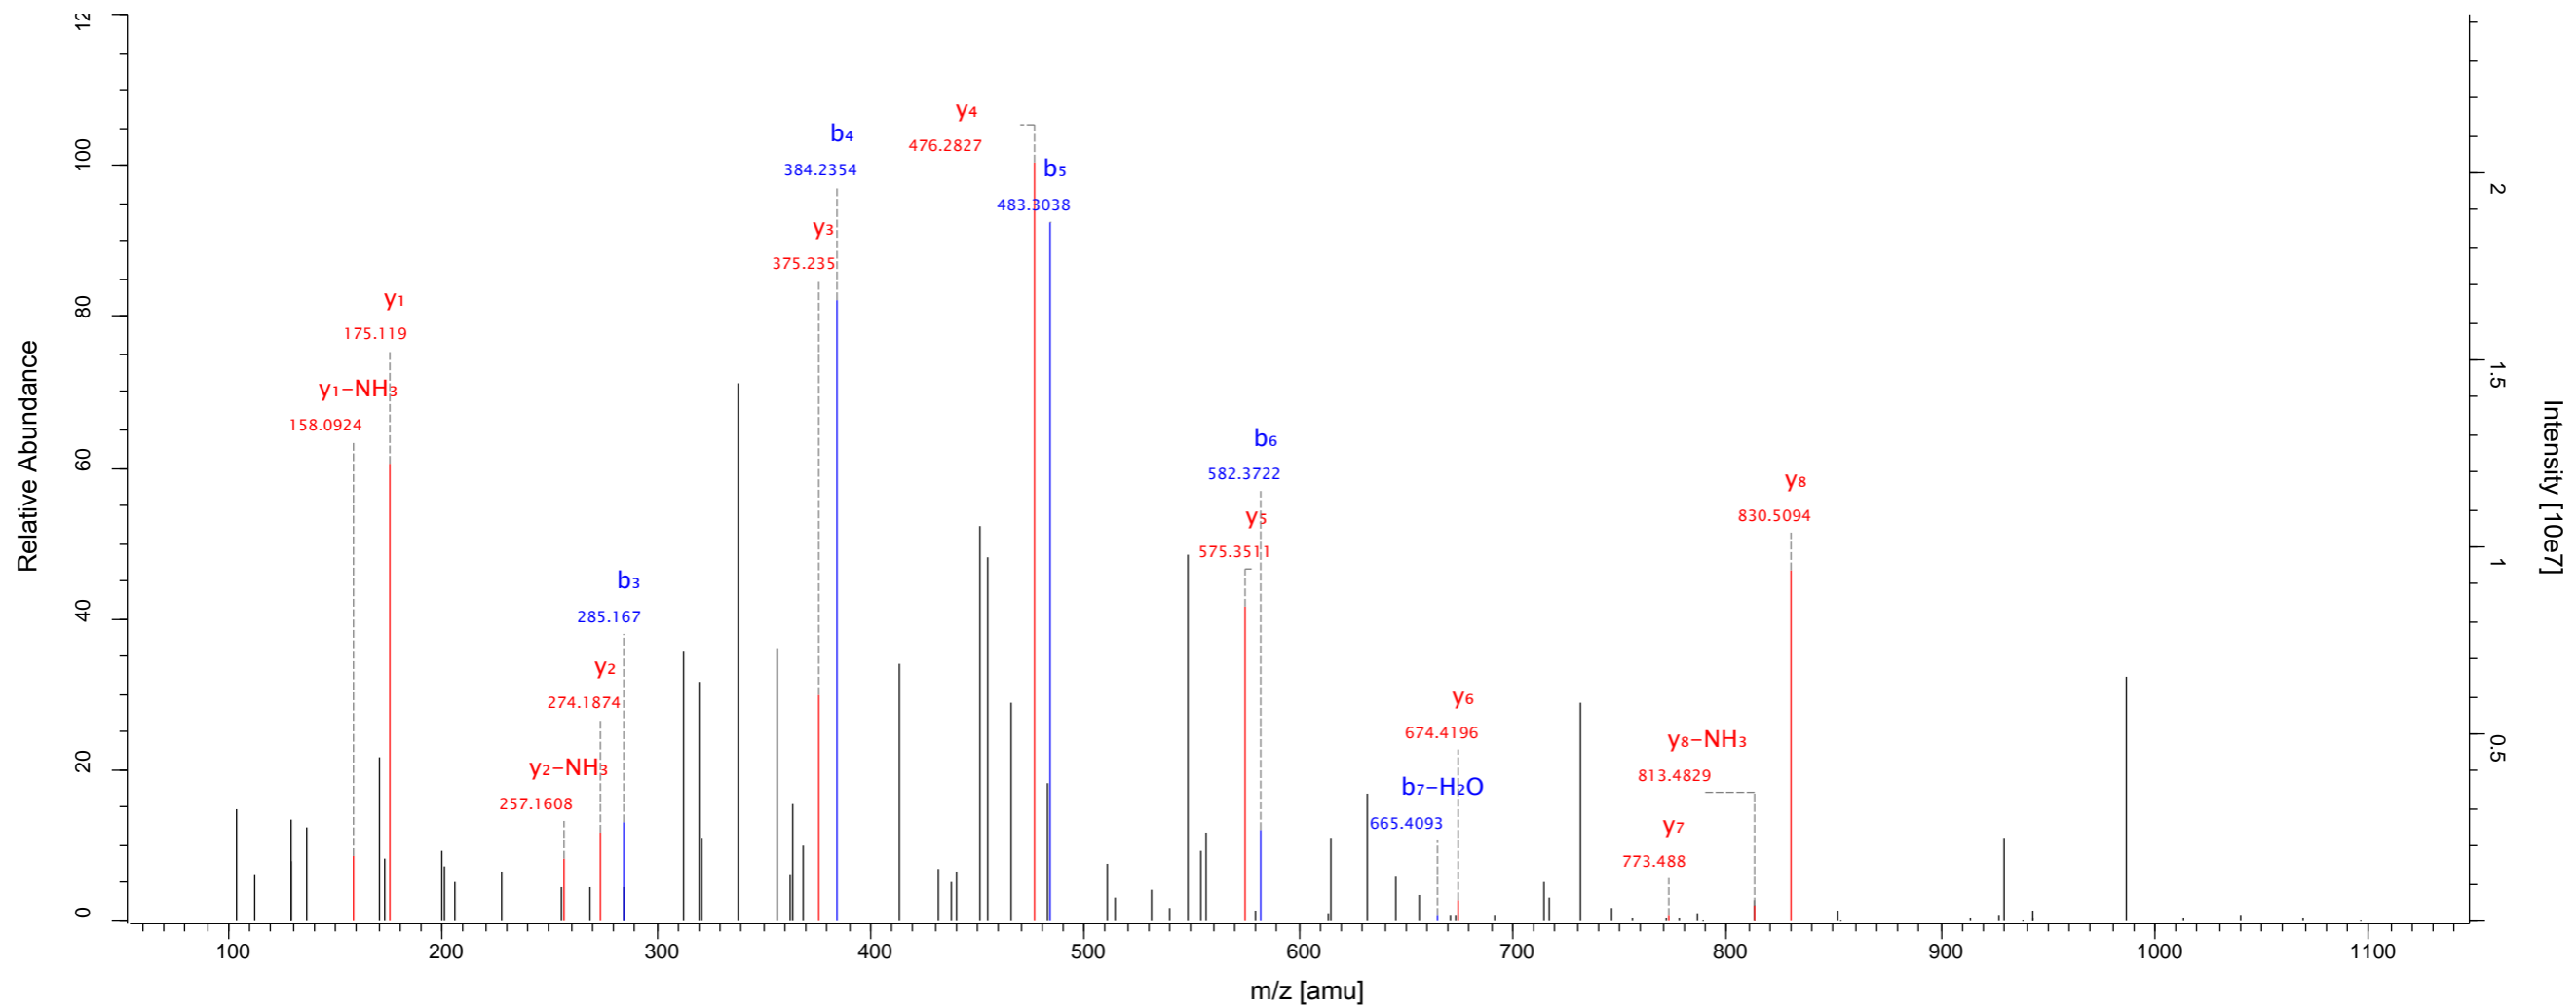

Raw file: 20111212\_EXQ5\_AnMi\_QC\_HCMVp1\_36  
 Scan number: 17563  
 Protein: ORFL299W + NC\_006273.2[185047,185685]+ <unknown description>  
 Peptide score: 138.42  
 Method: FTMS; HCD

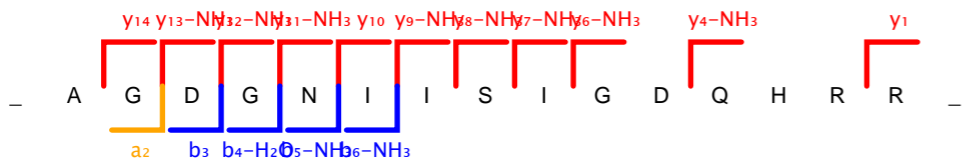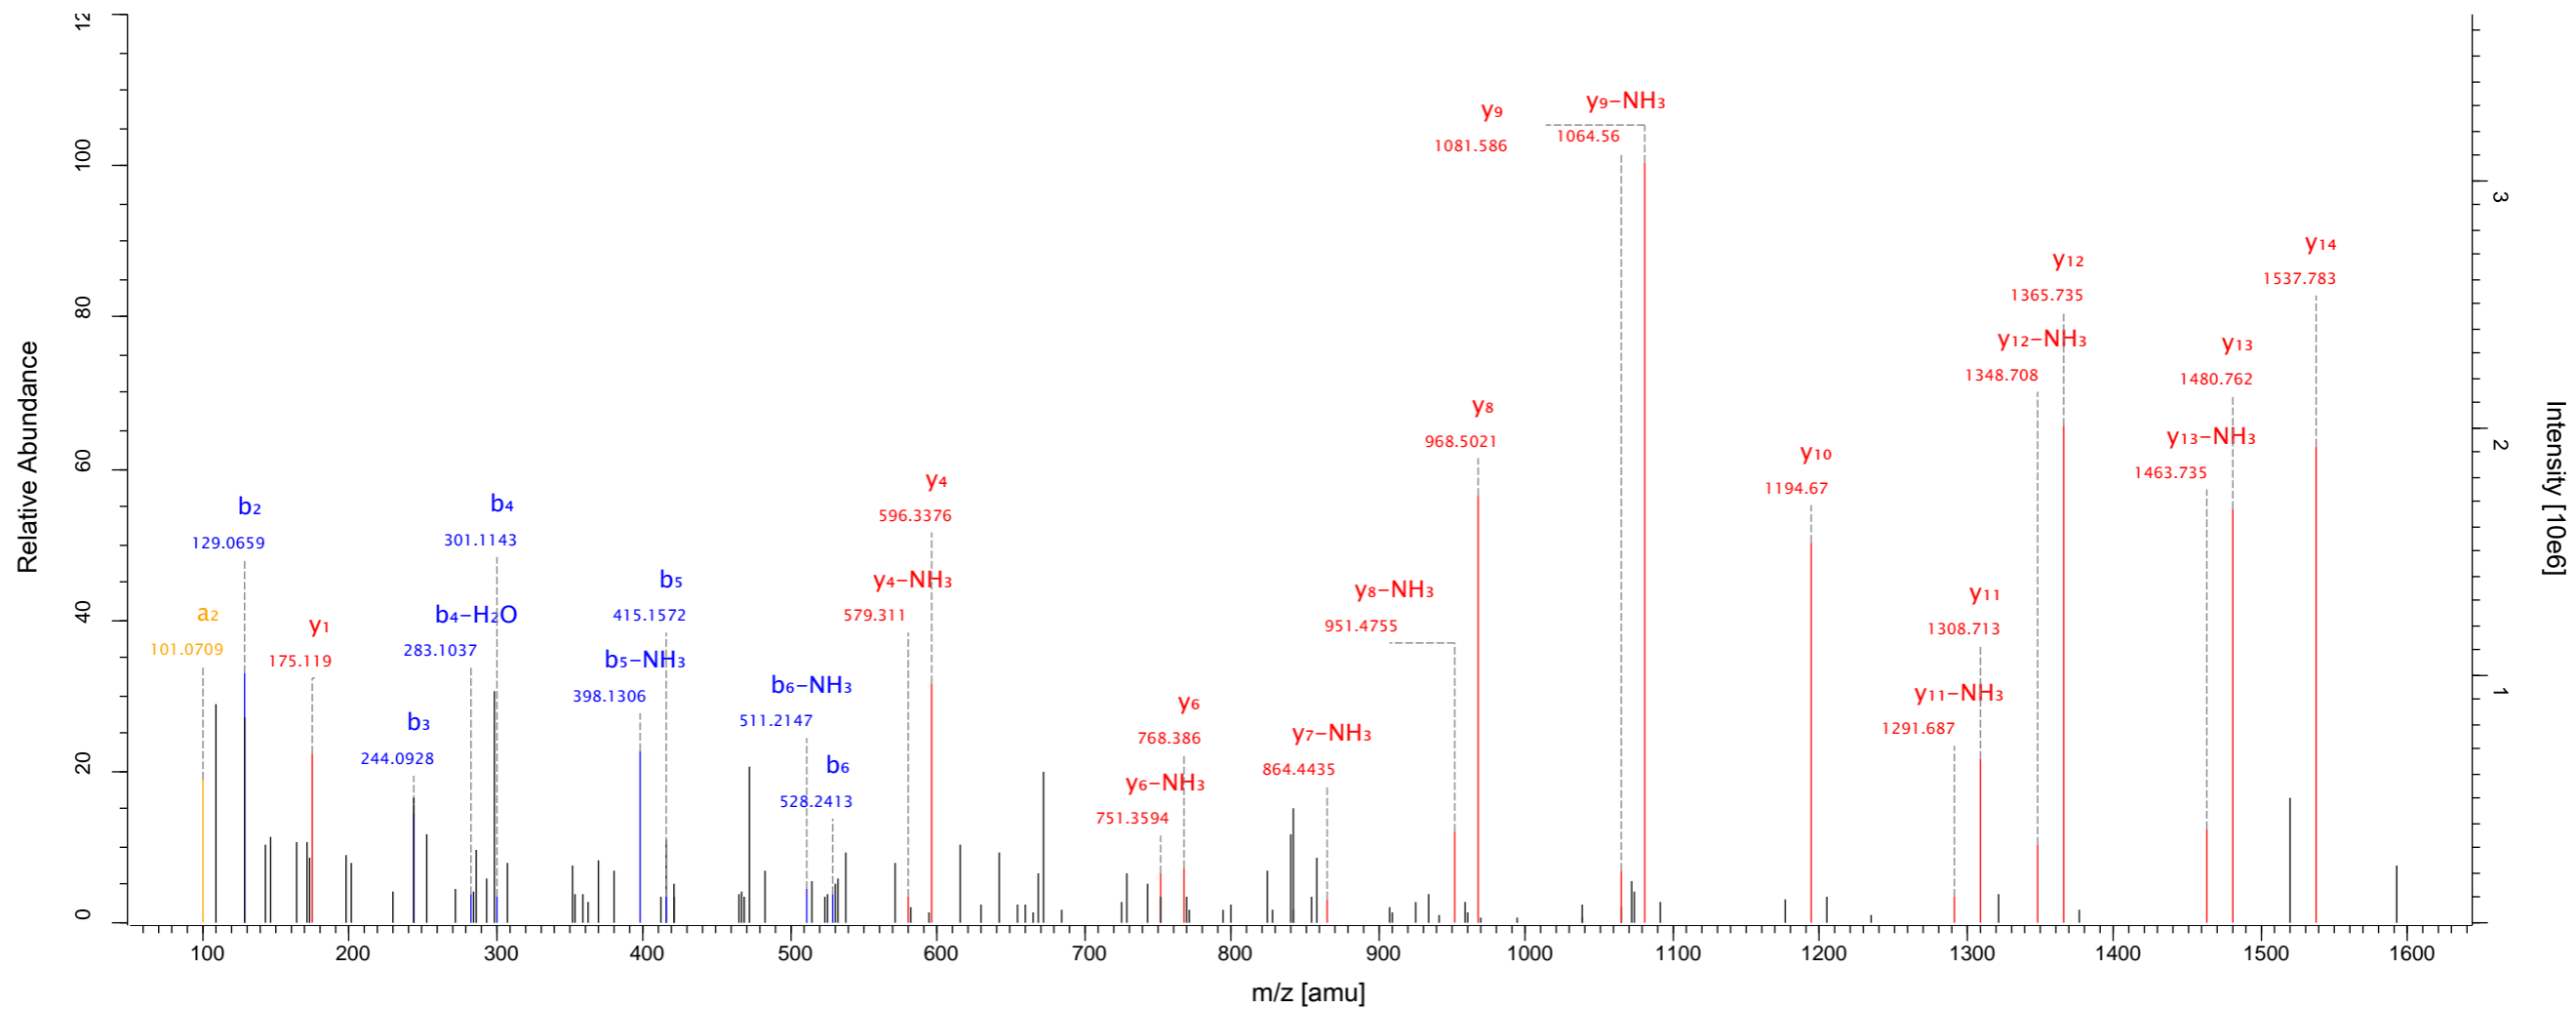

Raw file: 20111212\_EXQ5\_AnMi\_QC\_HCMVp1\_36  
 Scan number: 22267  
 Protein: ORFL299W + NC\_006273.2[185047,185685]+ <unknown description>  
 Peptide score: 213.18  
 Method: FTMS; HCD

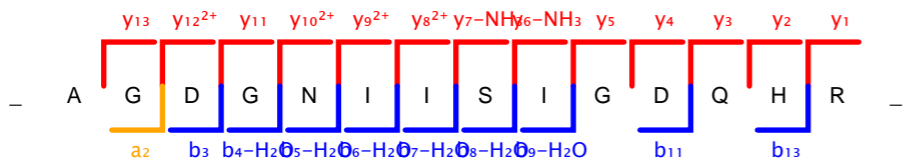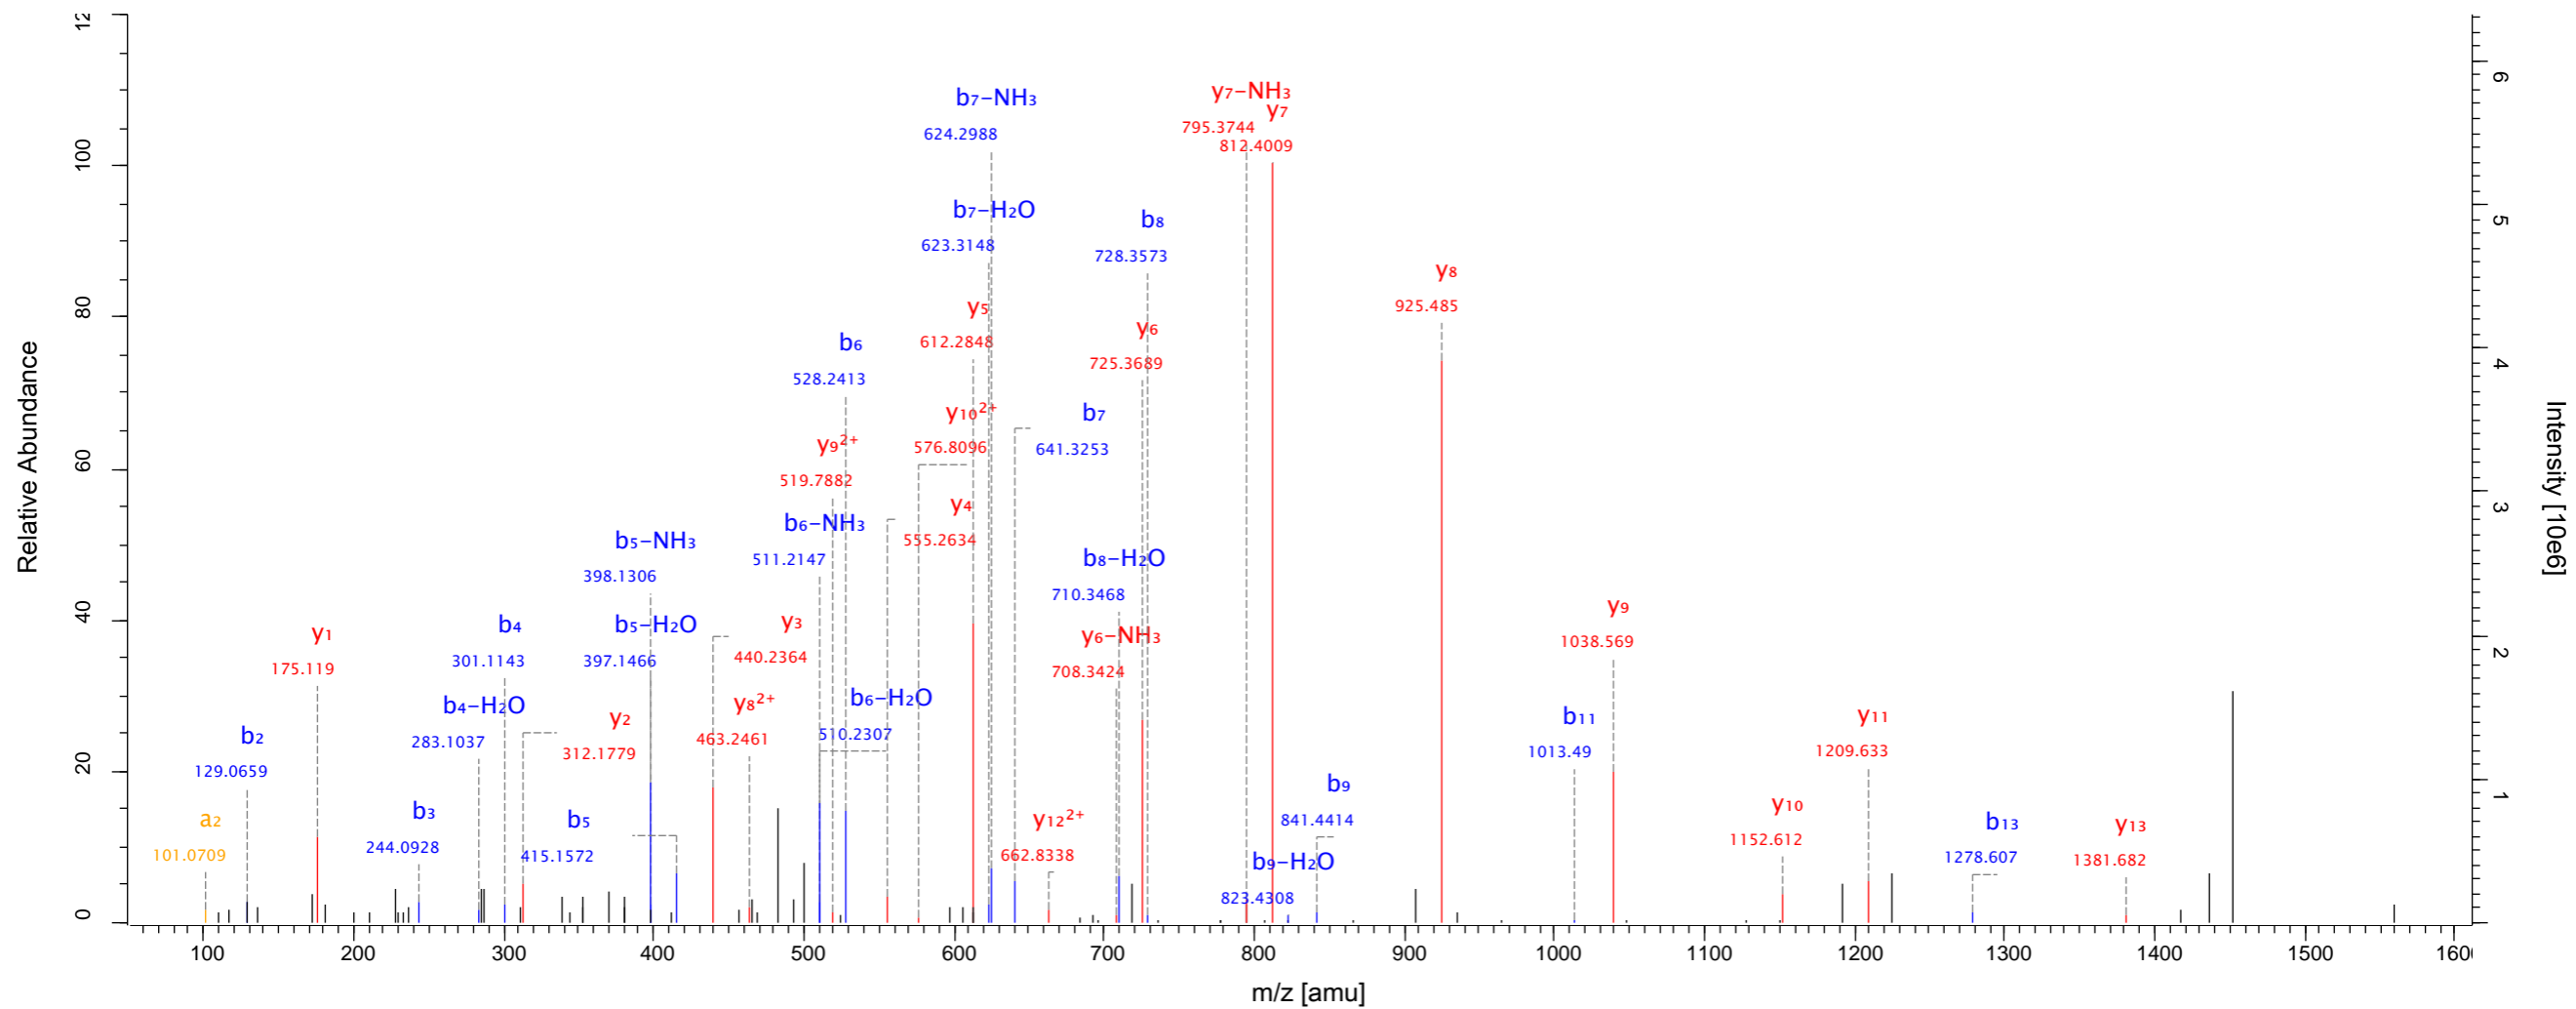

Raw file: 20111212\_EXQ5\_AnMi\_QC\_HCMVp11\_36  
Scan number: 23427  
Protein: ORFL114W + NC\_006273.2[60151,60708]+ <unknown description>  
Peptide score: 93.26  
Method: FTMS; HCD

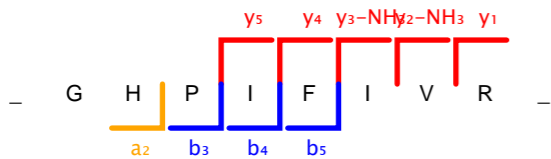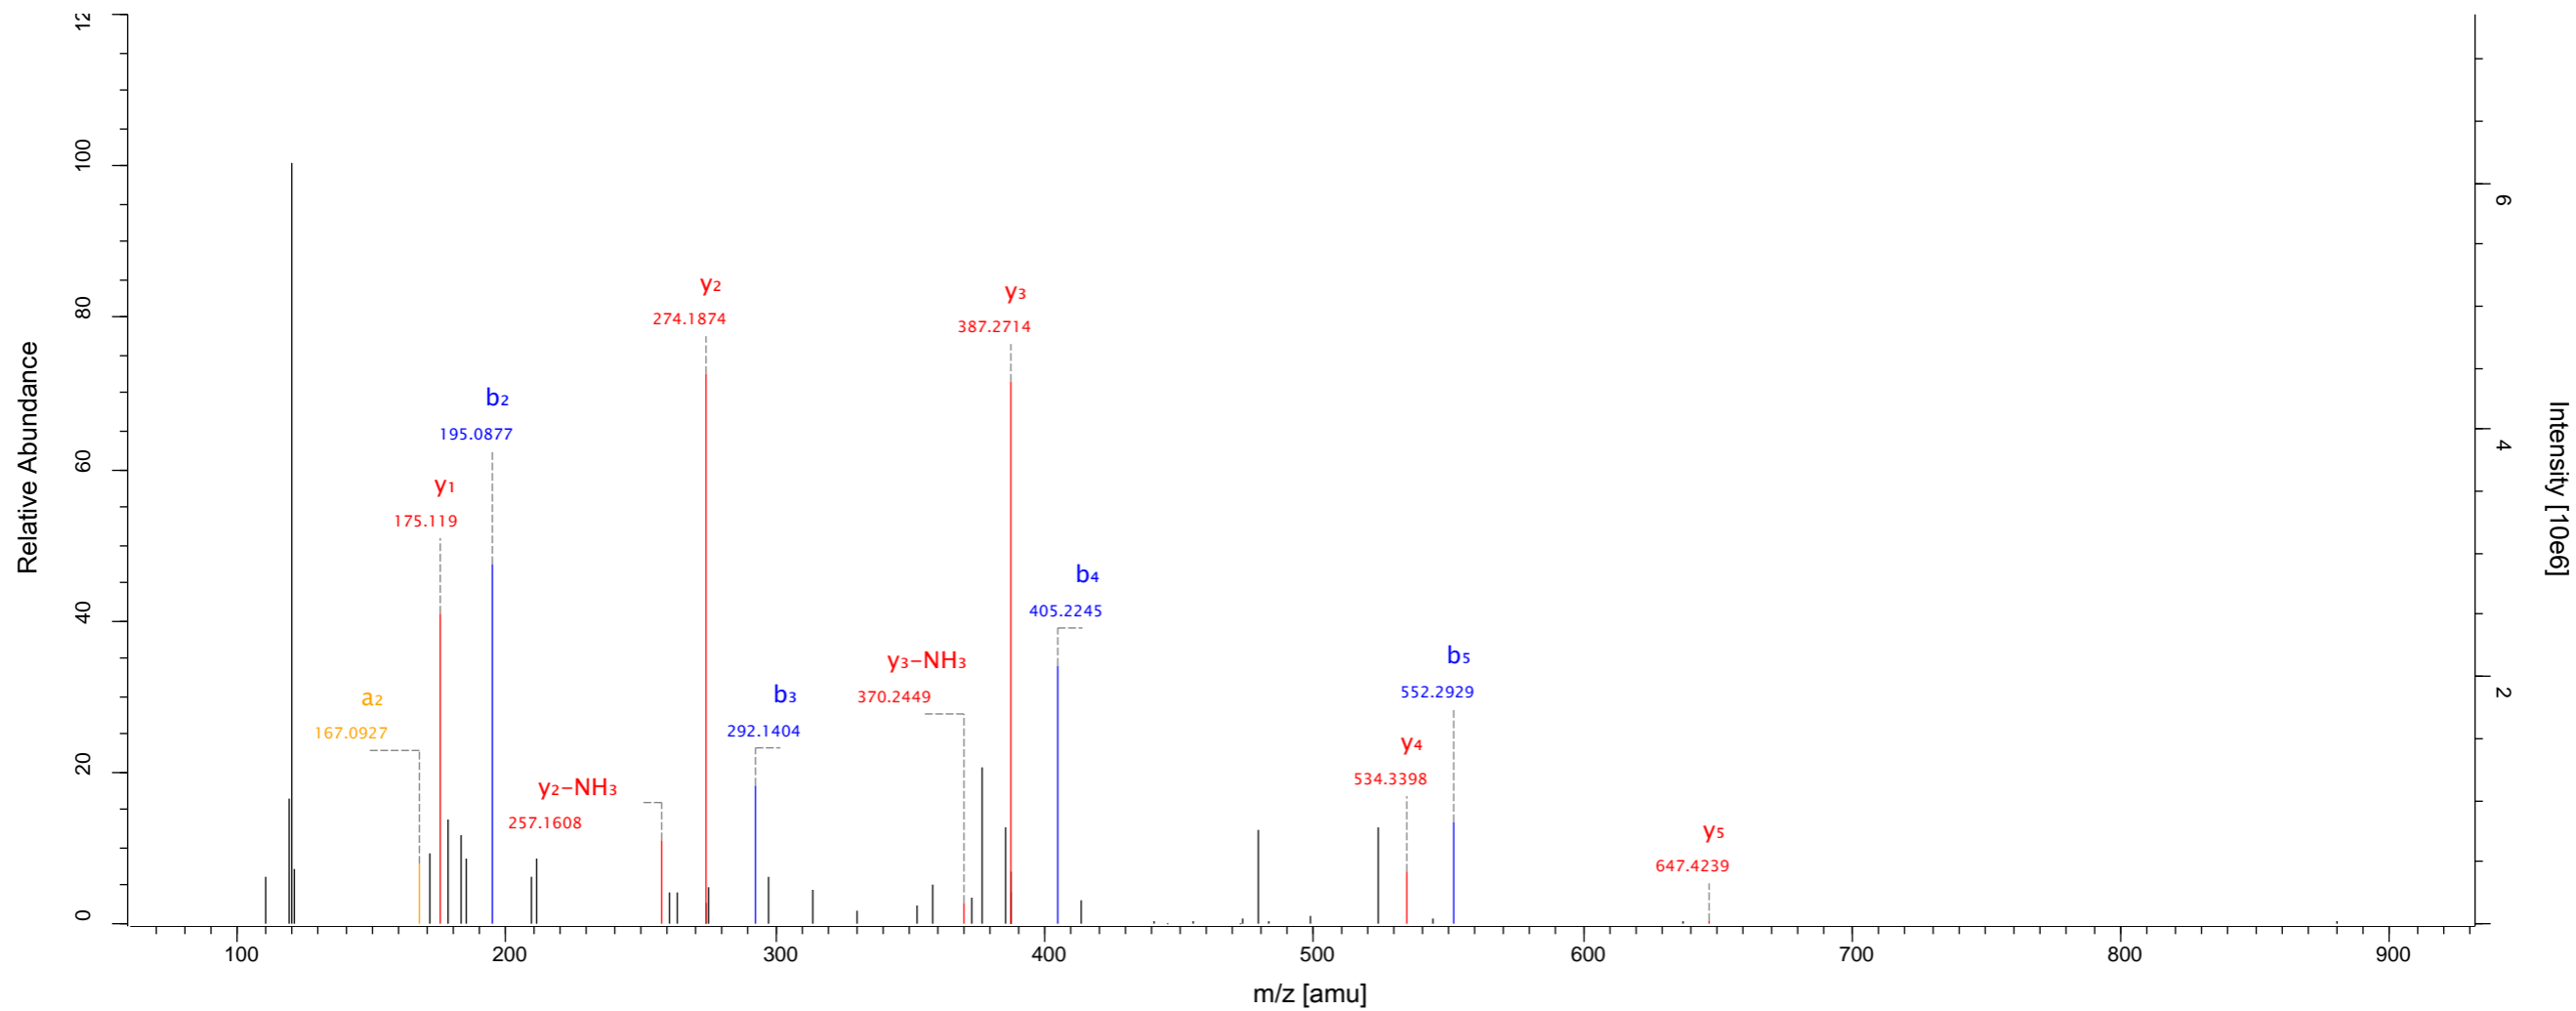

Raw file: 20111212\_EXQ5\_AnMi\_QC\_HCMVp1\_36  
 Scan number: 29817  
 Protein: ORFL130W + NC\_006273.2[72313,72744]+ <unknown description>  
 Peptide score: 190.41  
 Method: FTMS; HCD

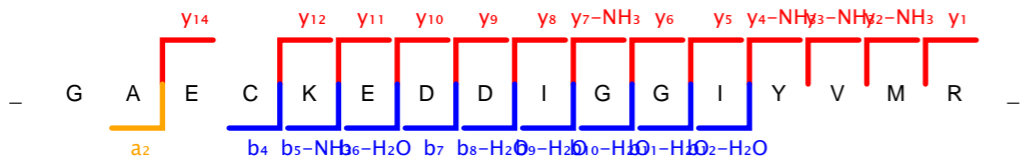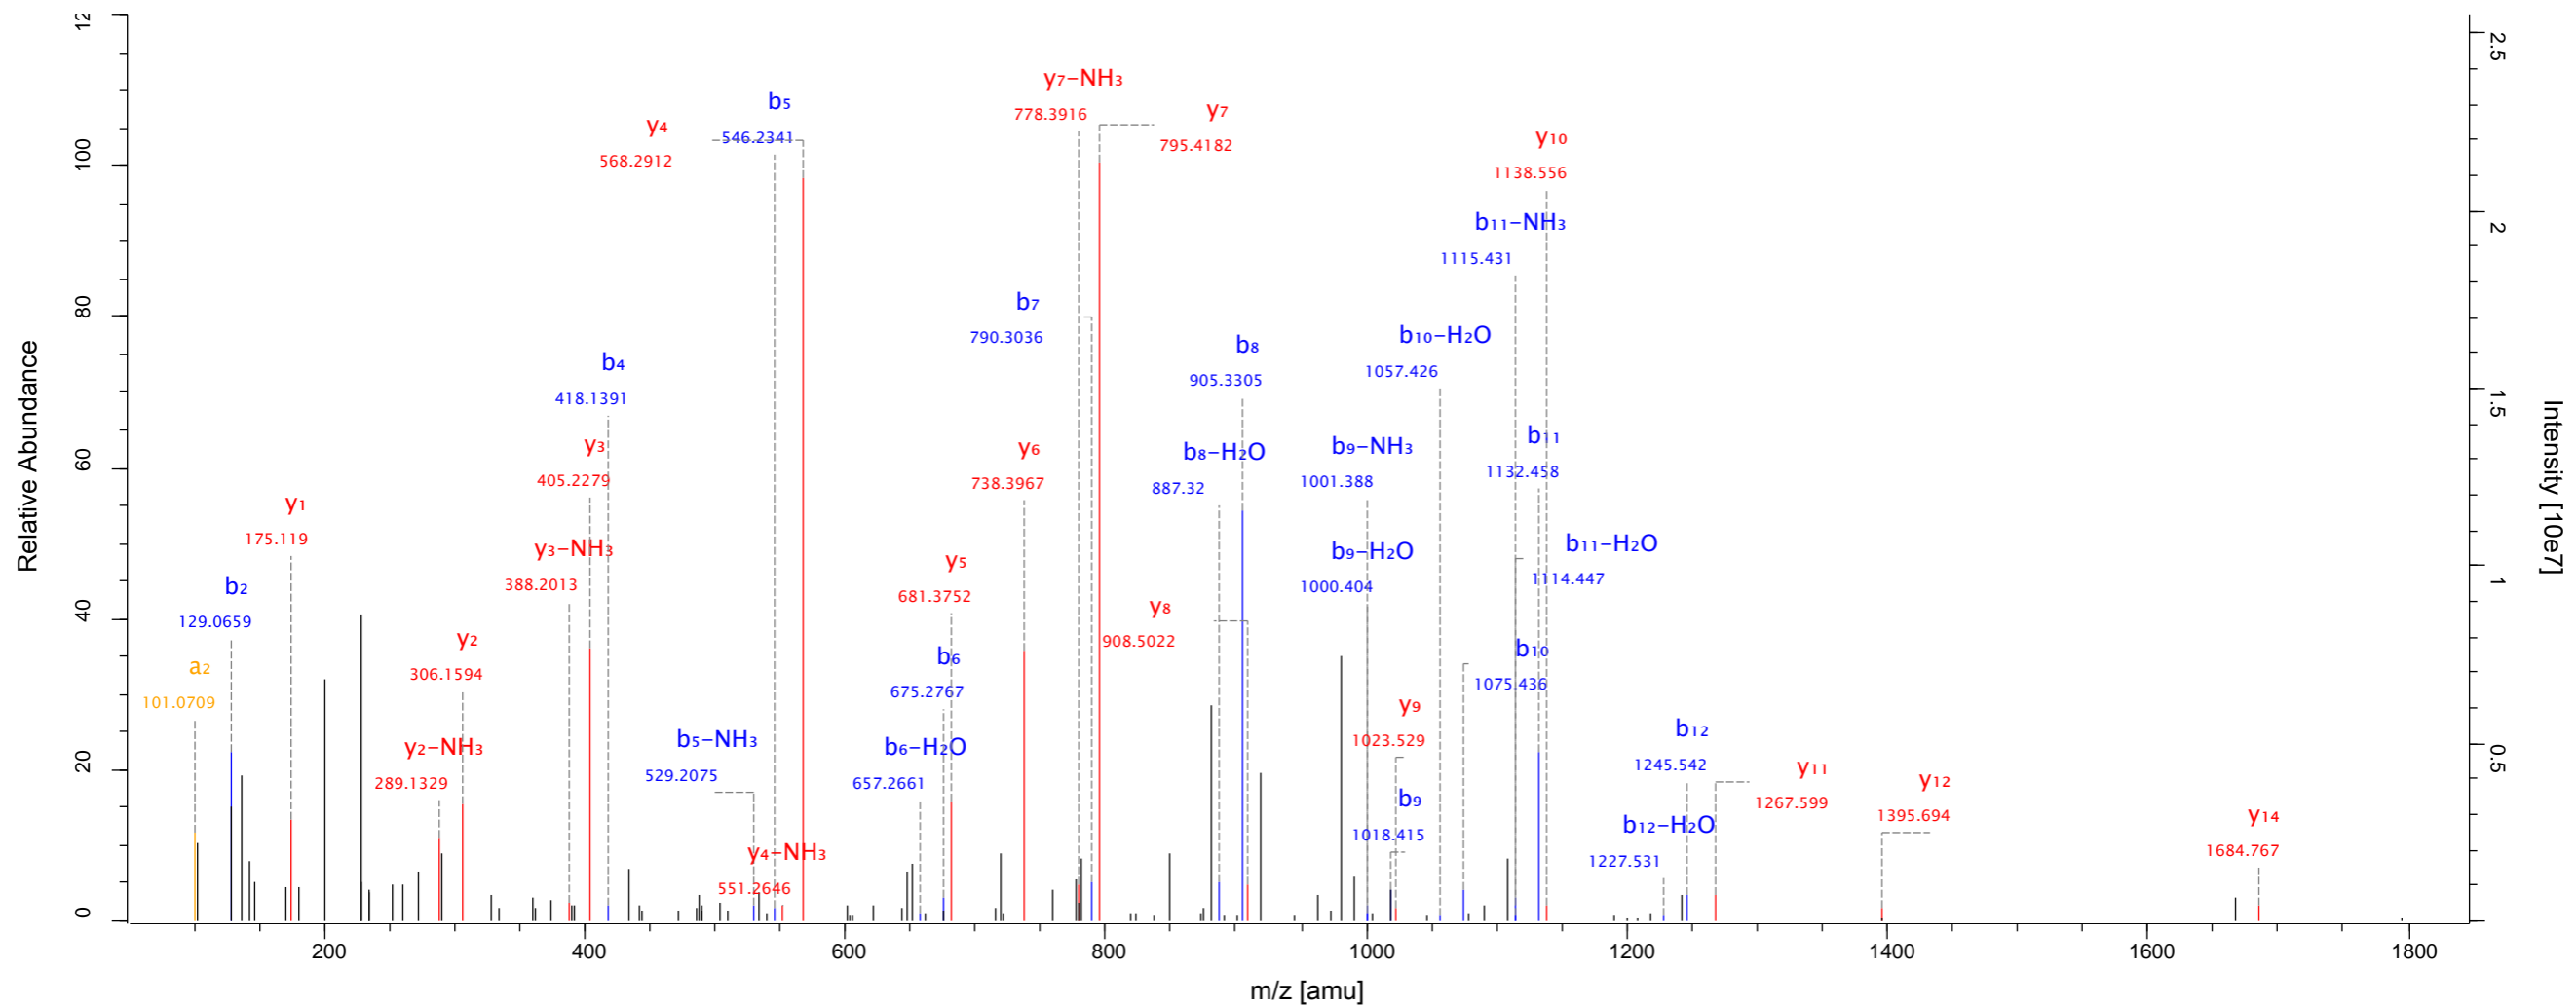

Raw file: 20111212\_EXQ5\_AnMi\_QC\_HCMVp1\_36  
 Scan number: 34110  
 Protein: ORFL299W + NC\_006273.2[185047,185685]+ <unknown description>  
 Peptide score: 92.05  
 Method: FTMS; HCD

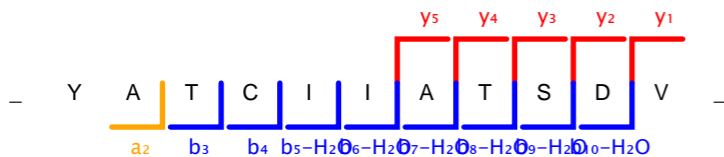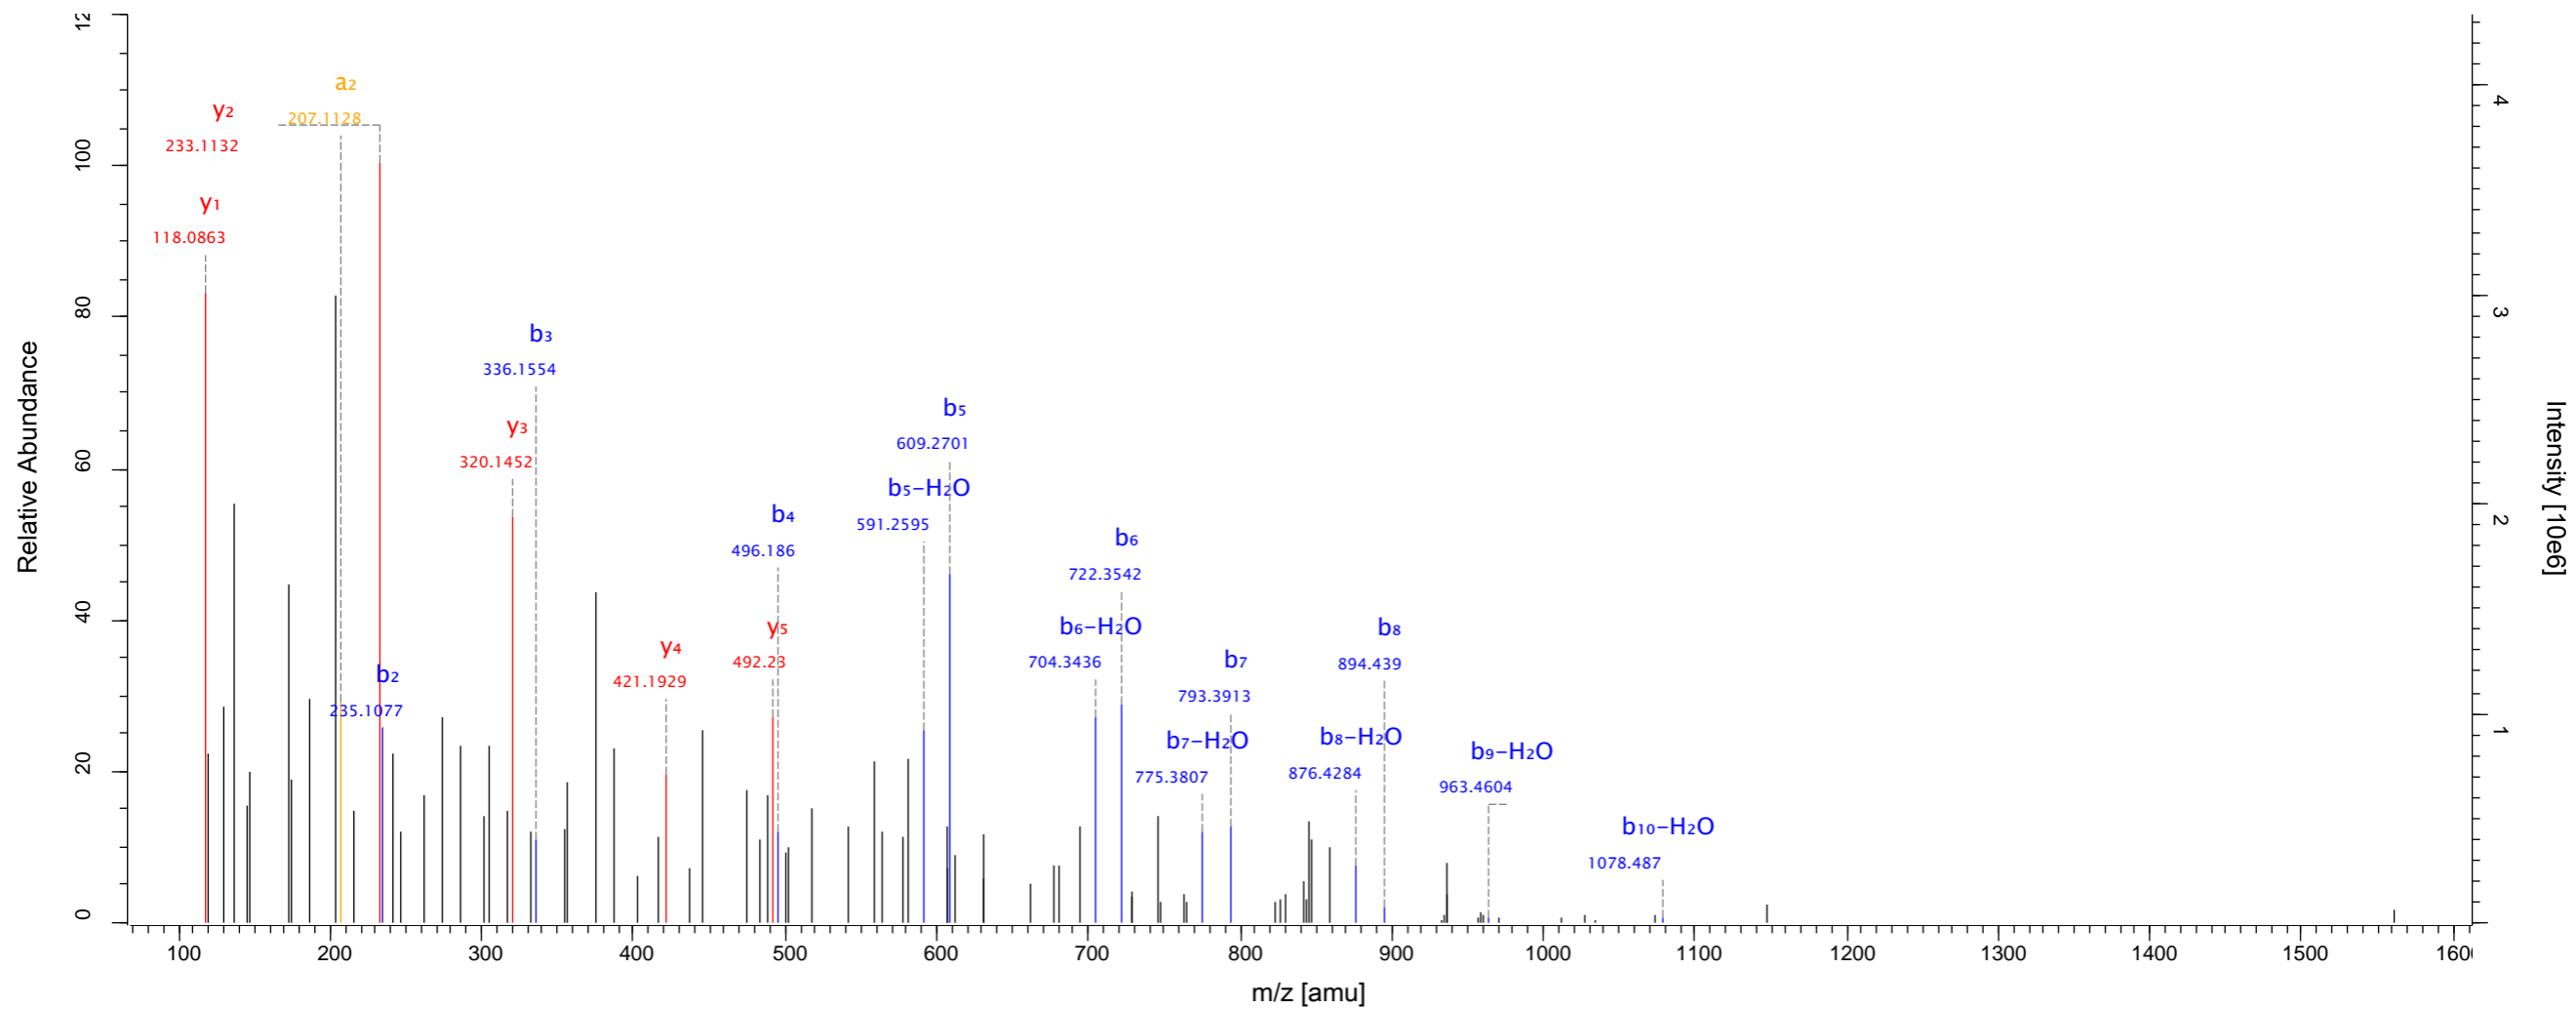



Raw file: 20111212\_EXQ5\_AnMi\_QC\_HCMVp1\_36  
 Scan number: 37079  
 Protein: ORFS365W + NC\_006273.2[225950,226606]+ <unknown description>  
 Peptide score: 177.57  
 Method: FTMS; HCD

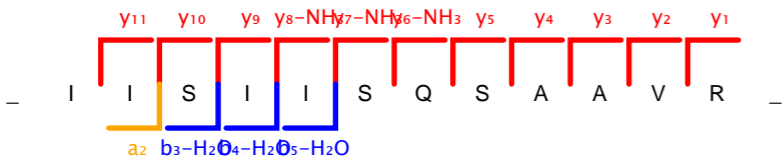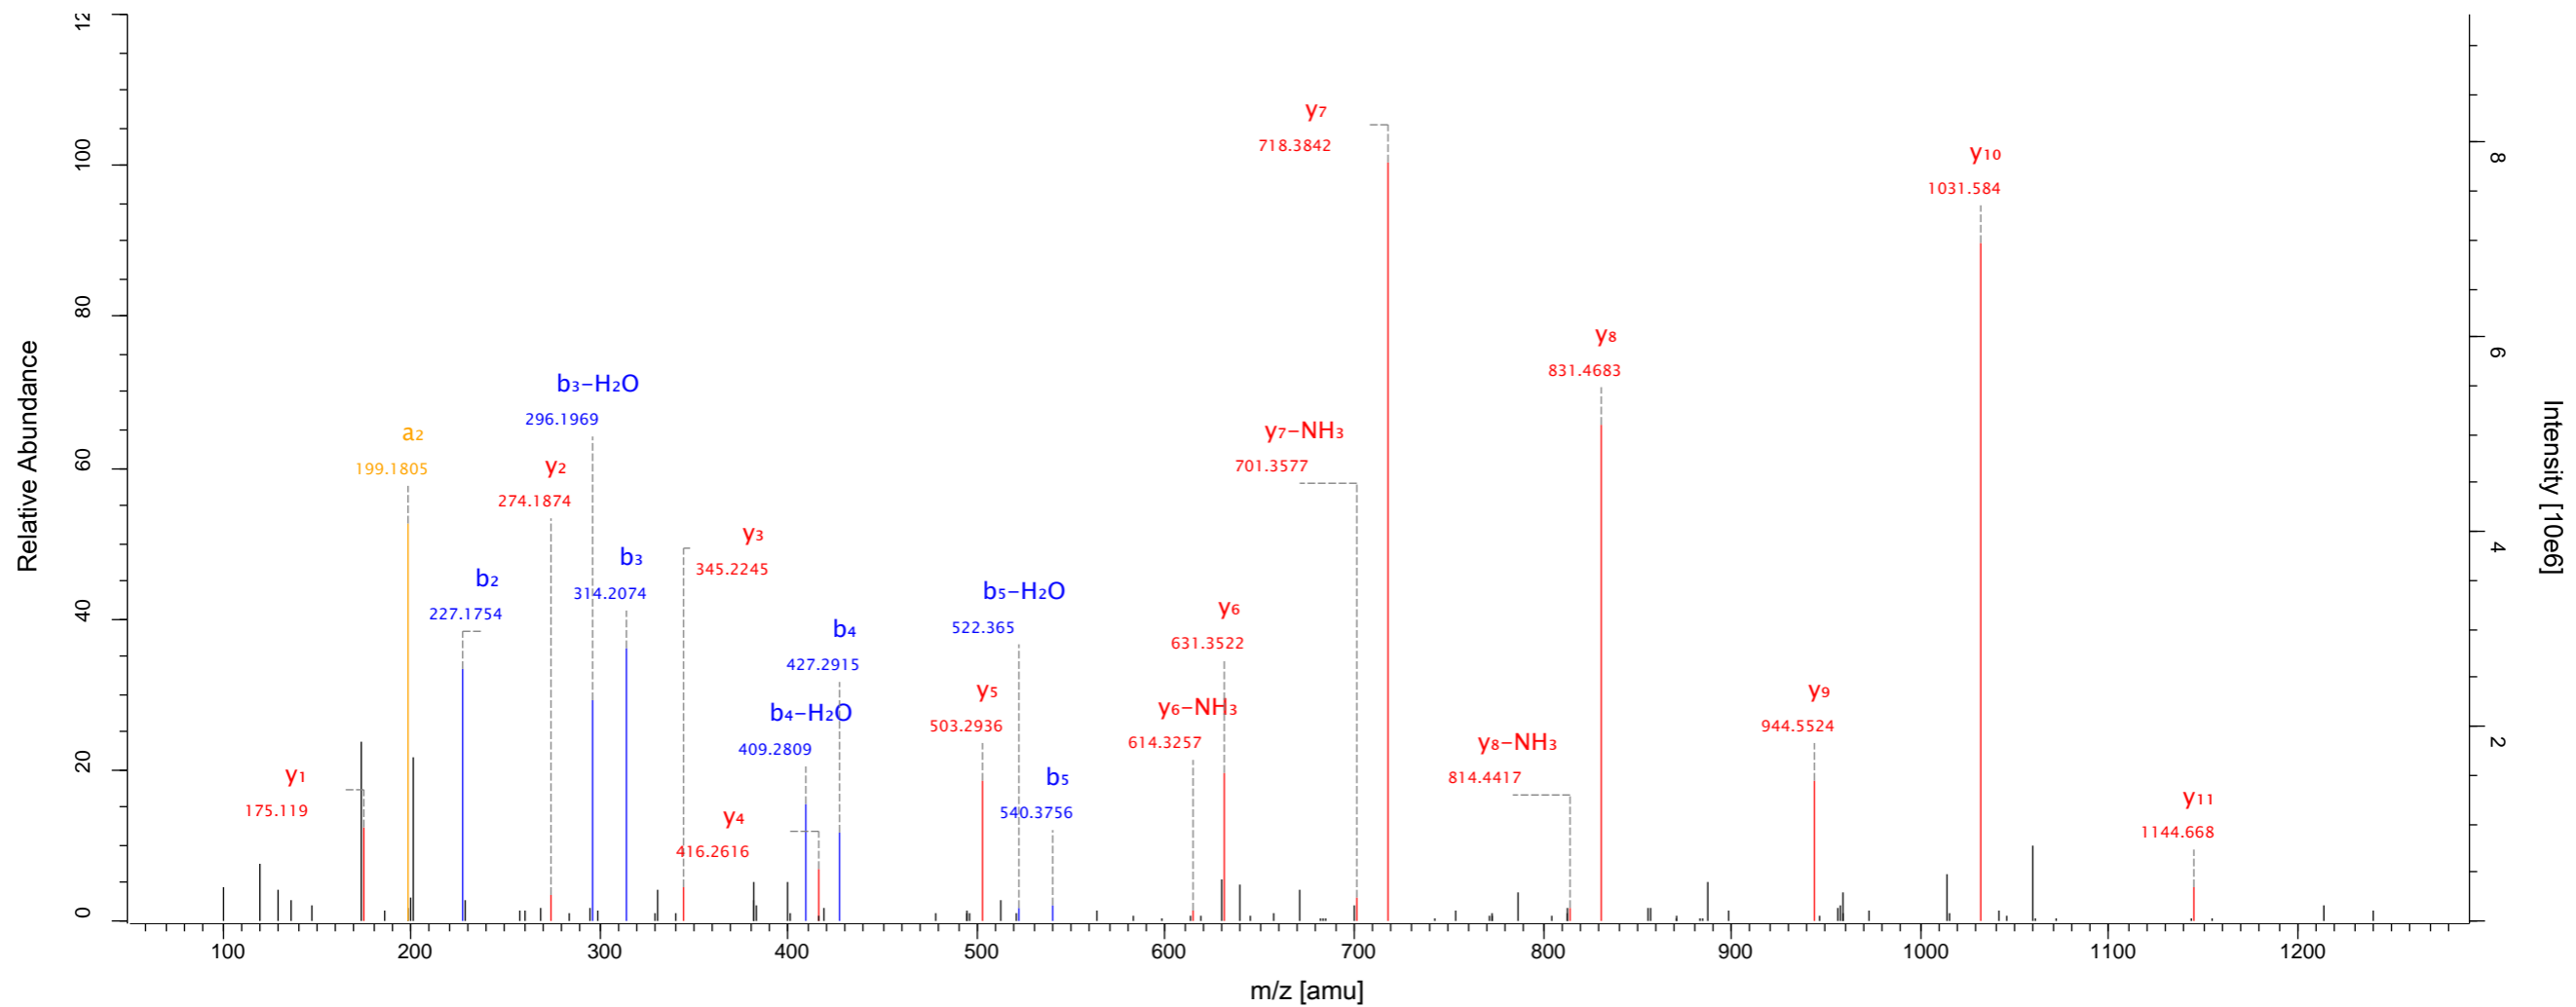

Raw file: 20111212\_EXQ5\_AnMi\_QC\_HCMVp1\_36  
Scan number: 44126  
Protein: ORFL299W + NC\_006273.2[185047,185685]+ <unknown description>  
Peptide score: 83.85  
Method: FTMS; HCD

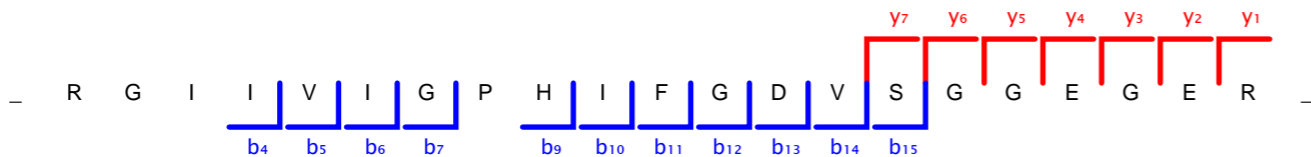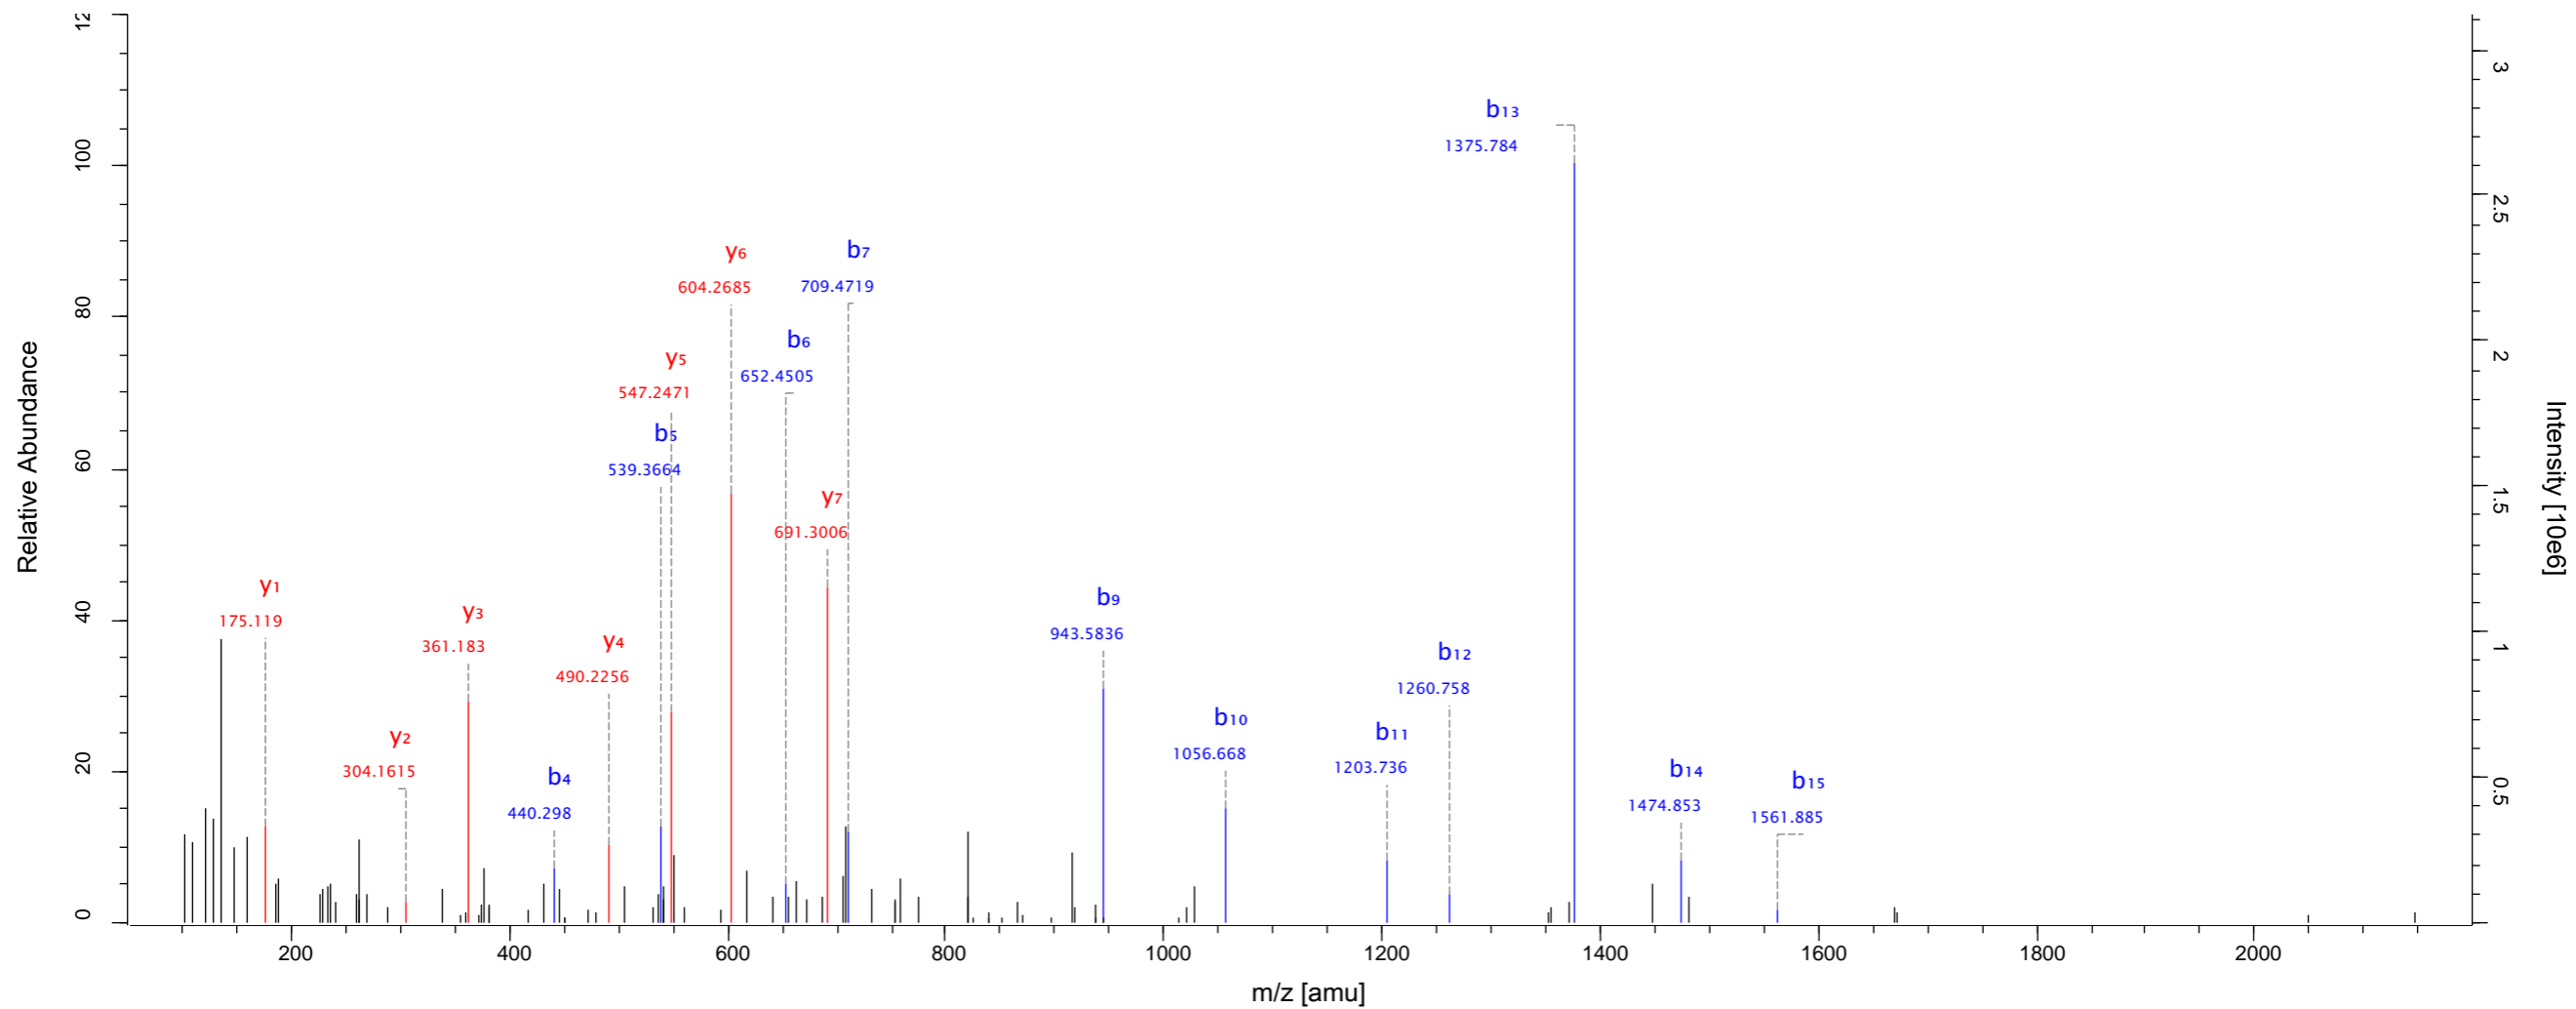

Raw file: 20111212\_EXQ5\_AnMi\_QC\_HCMVp1\_36  
 Scan number: 44703  
 Protein: ORFL299W + NC\_006273.2[185047,185685]+ <unknown description>  
 Peptide score: 108.56  
 Method: FTMS; HCD

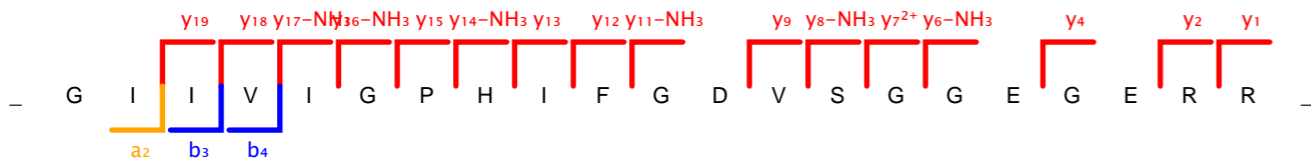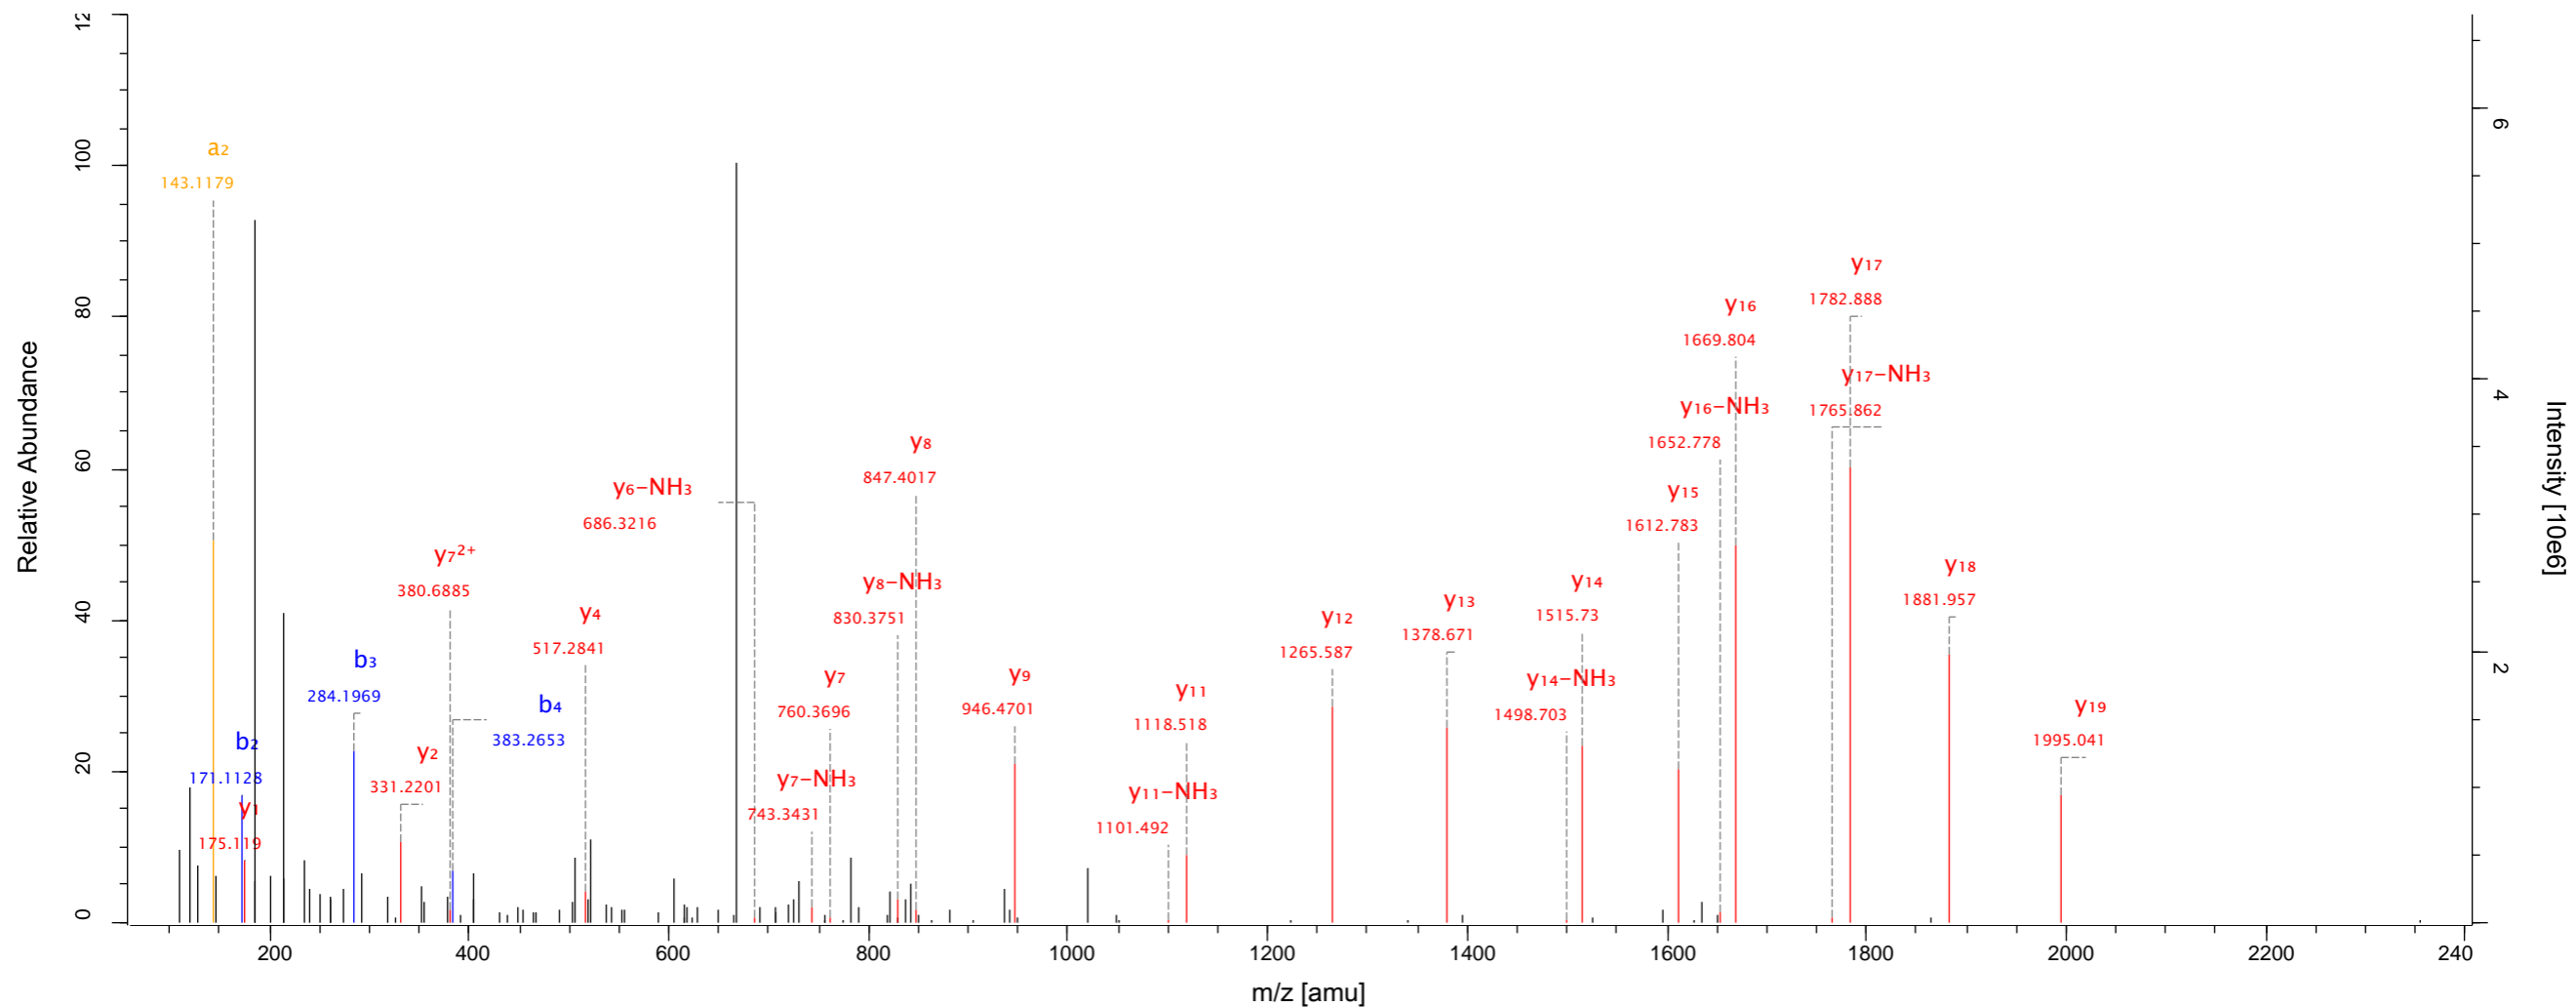

Raw file: 20111212\_EXQ5\_AnMi\_QC\_HCMVp11\_36  
Scan number: 53871  
Protein: ORFL130W + NC\_006273.2[72313,72744]+ <unknown description>  
Peptide score: 120.11  
Method: FTMS; HCD

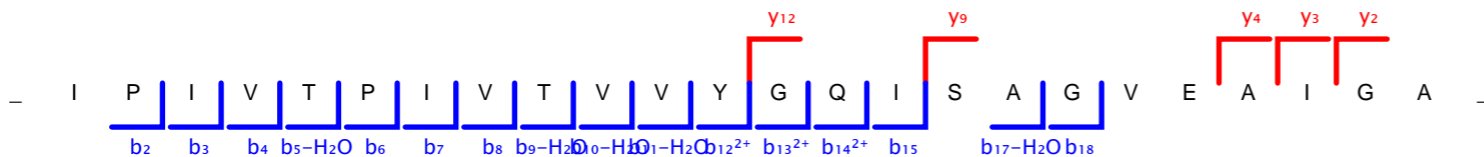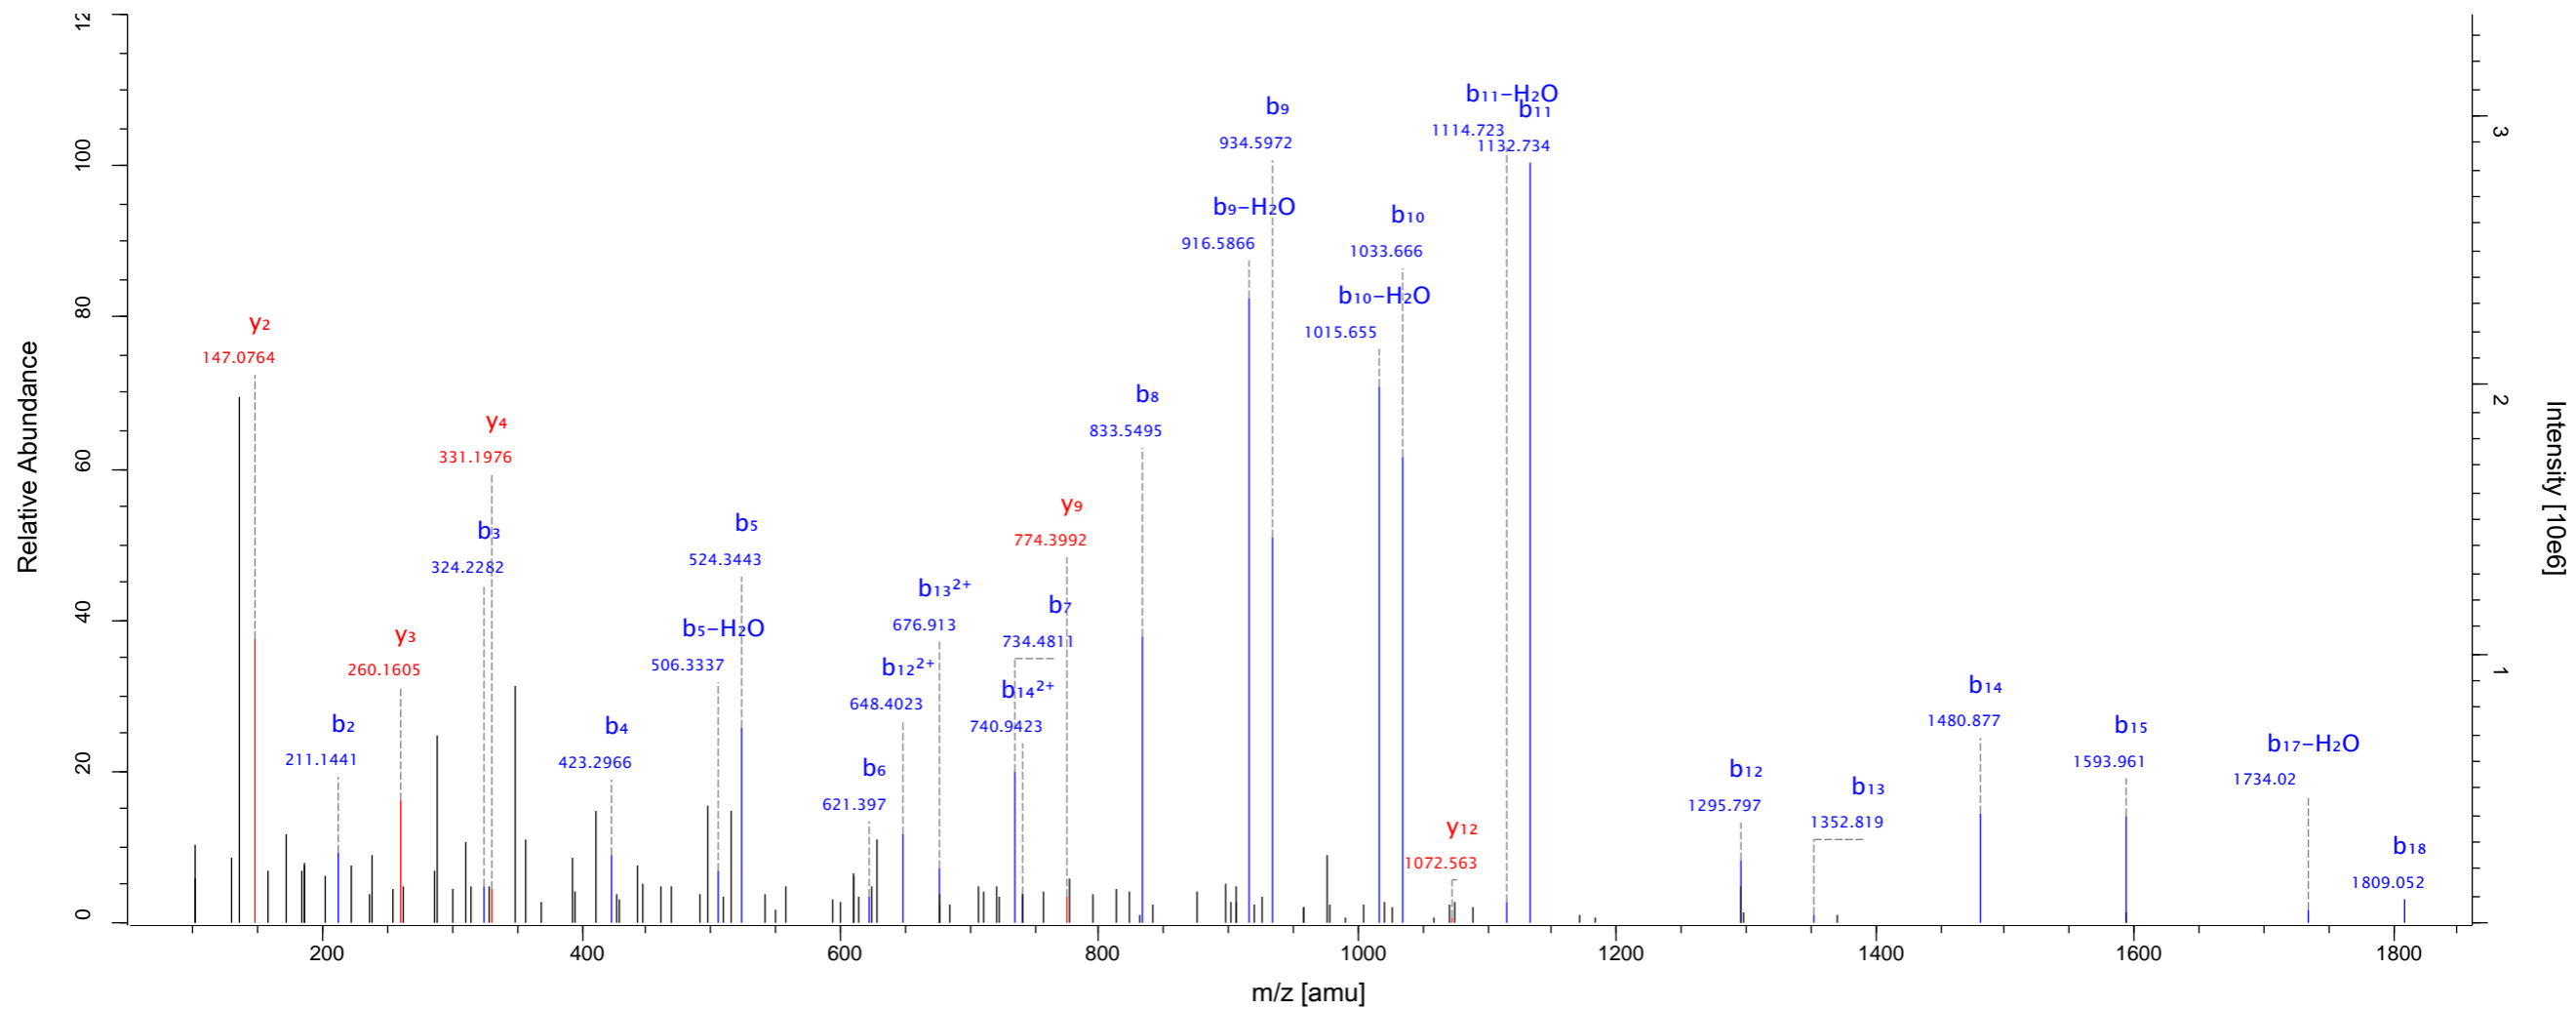

Raw file: 20111212\_EXQ5\_AnMi\_QC\_HCMVp11\_36  
Scan number: 5634  
Protein: ORFL114W + NC\_006273.2[60151,60708]+ <unknown description>  
Peptide score: 122.1  
Method: FTMS; HCD

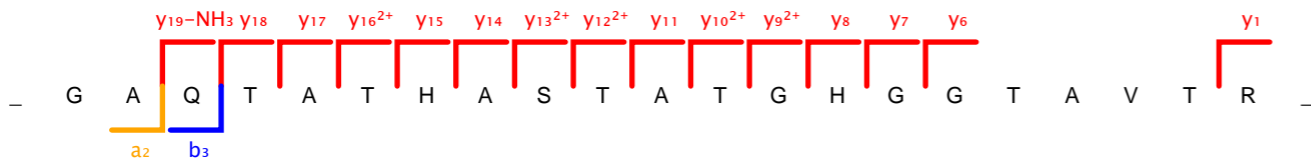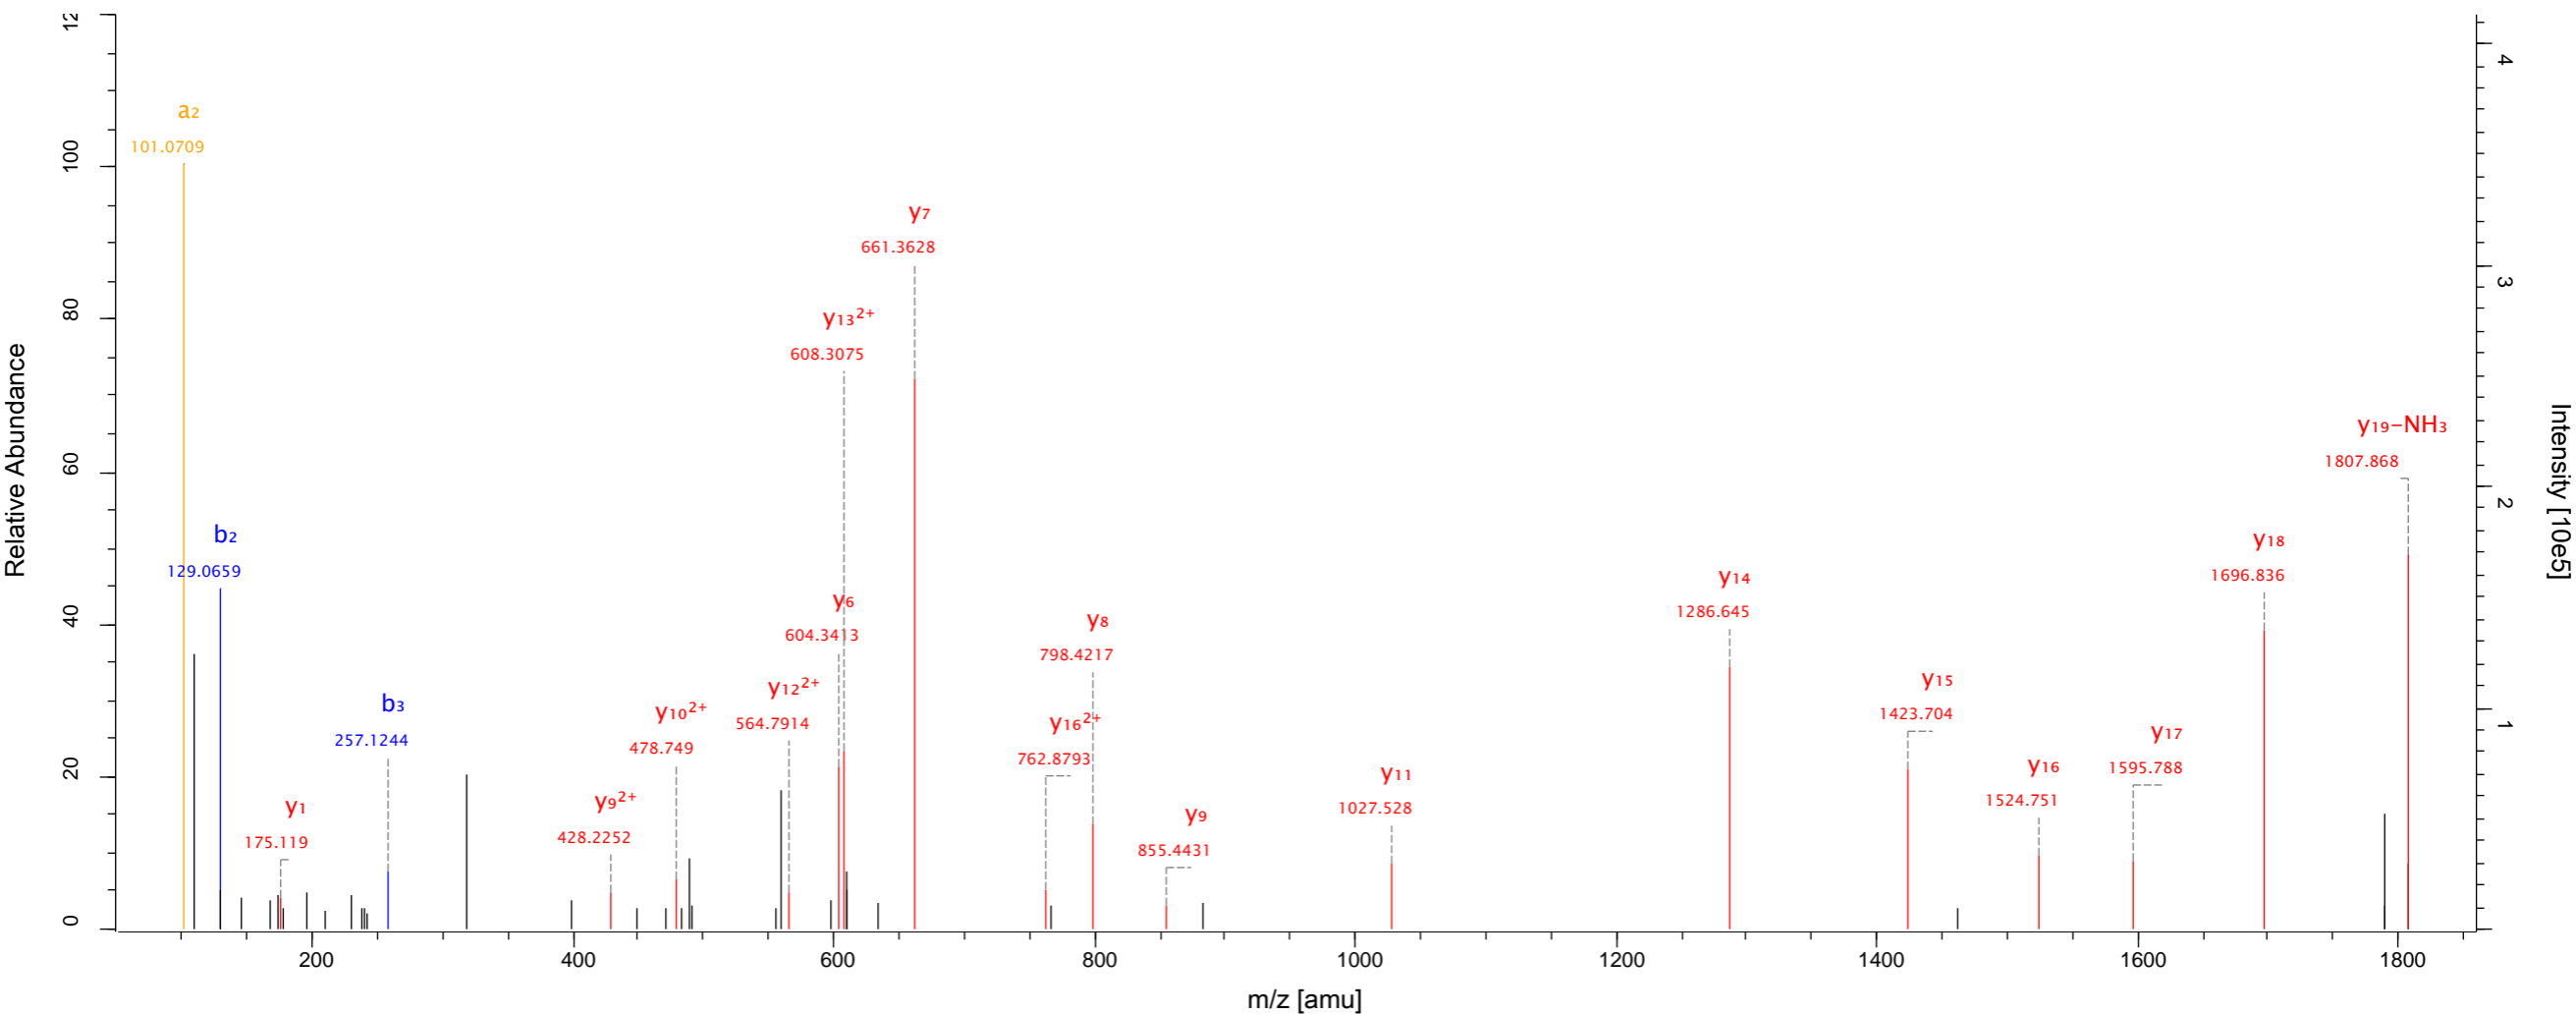

Raw file: 20111212\_EXQ5\_AnMi\_QC\_HCMVp1\_36  
Scan number: 9408  
Protein: ORFL299W + NC\_006273.2[185047,185685]+ <unknown description>  
Peptide score: 72.48  
Method: FTMS; HCD

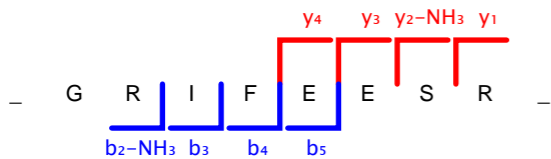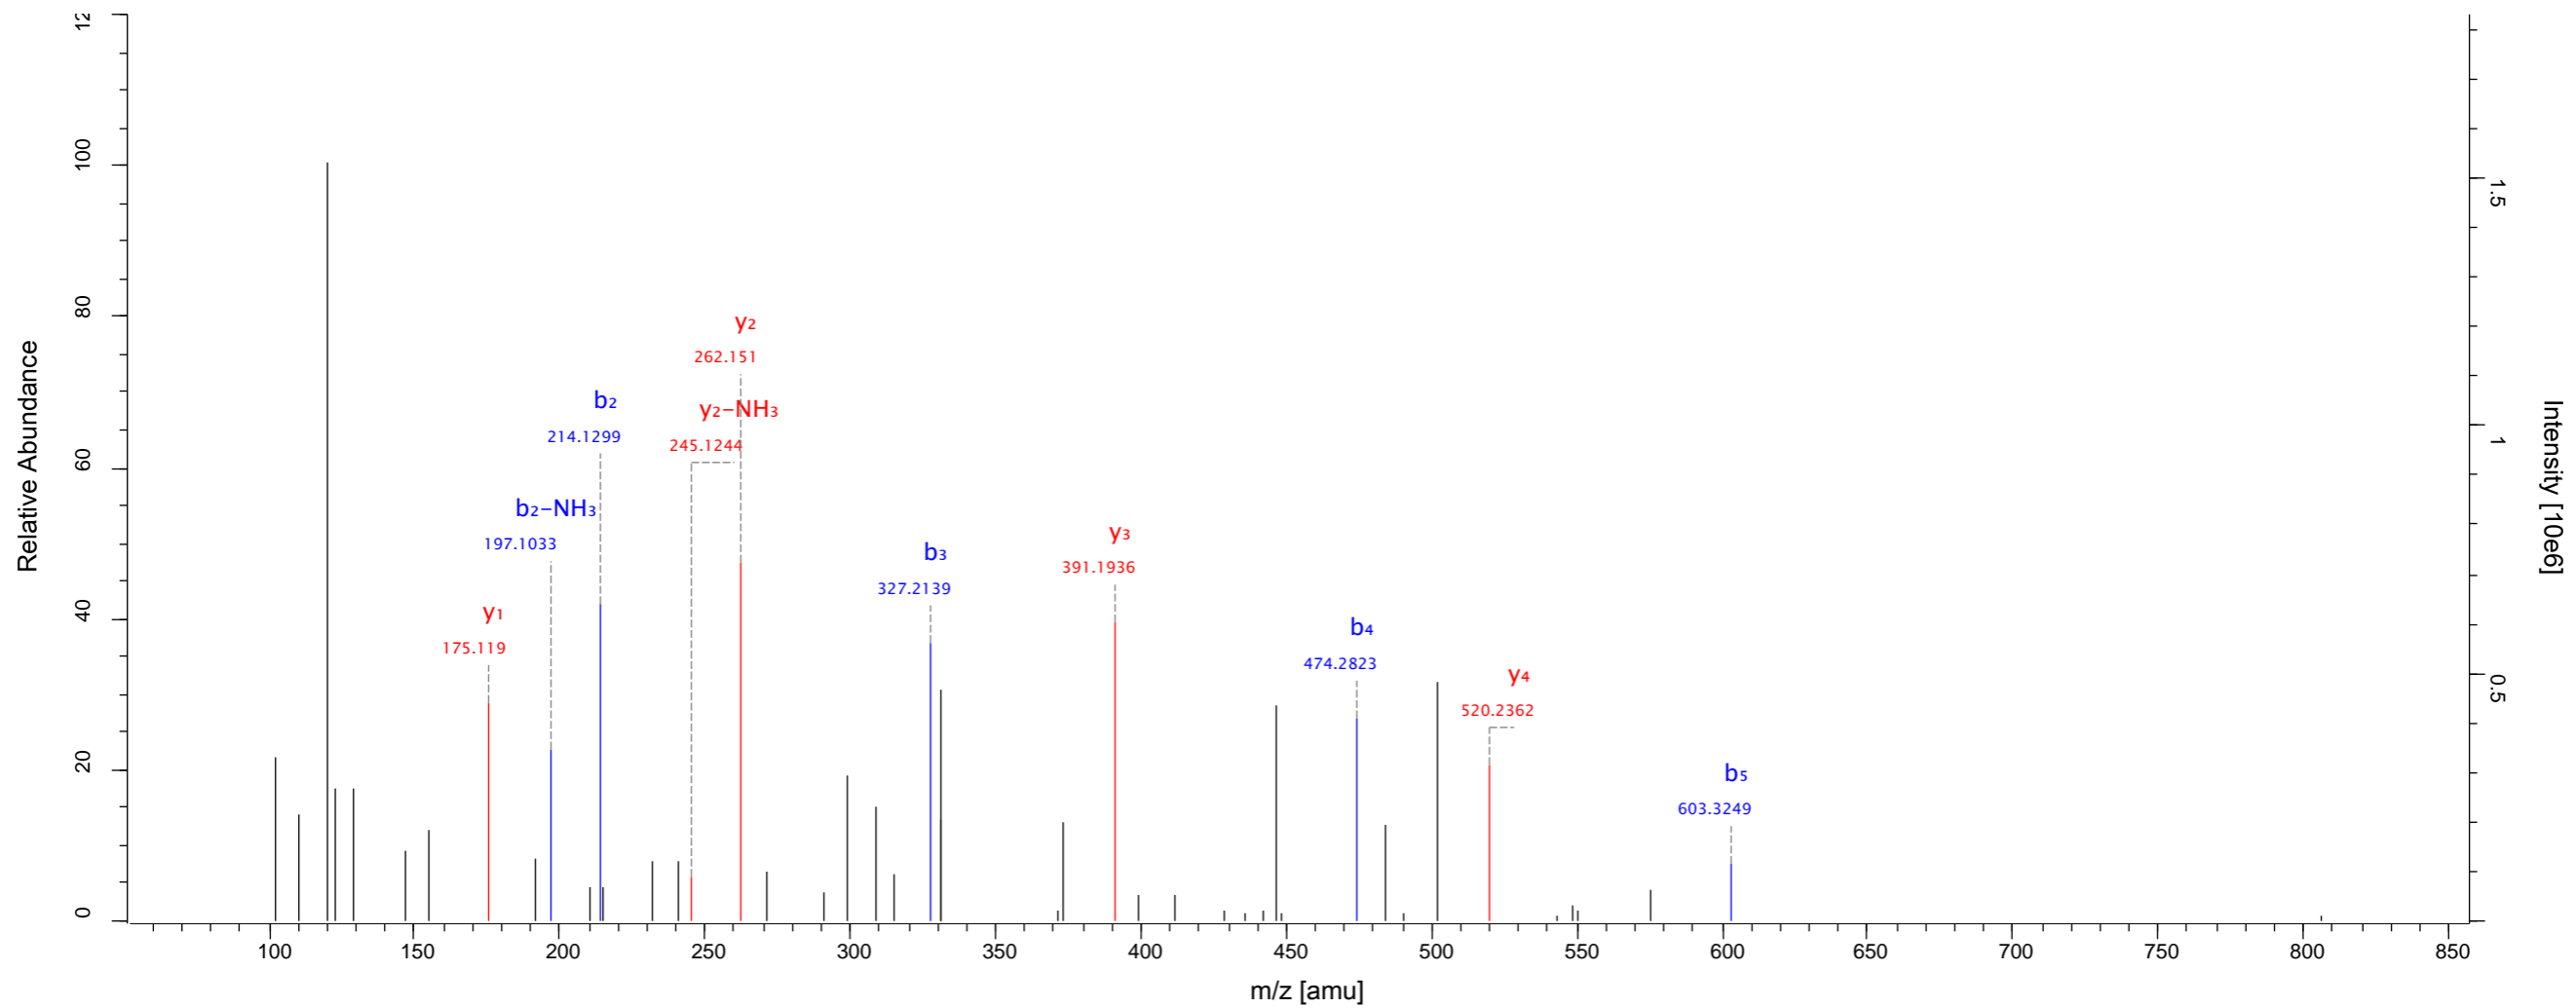

Raw file: 20111212\_EXQ5\_AnMi\_QC\_HCMVp1\_37  
 Scan number: 19603  
 Protein: ORFL82W + NC\_006273.2[36796,37488]+ <unknown description>  
 Peptide score: 115.82  
 Method: FTMS; HCD

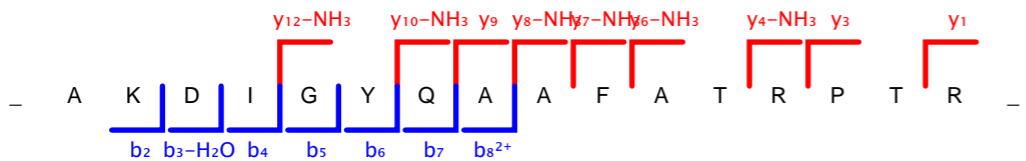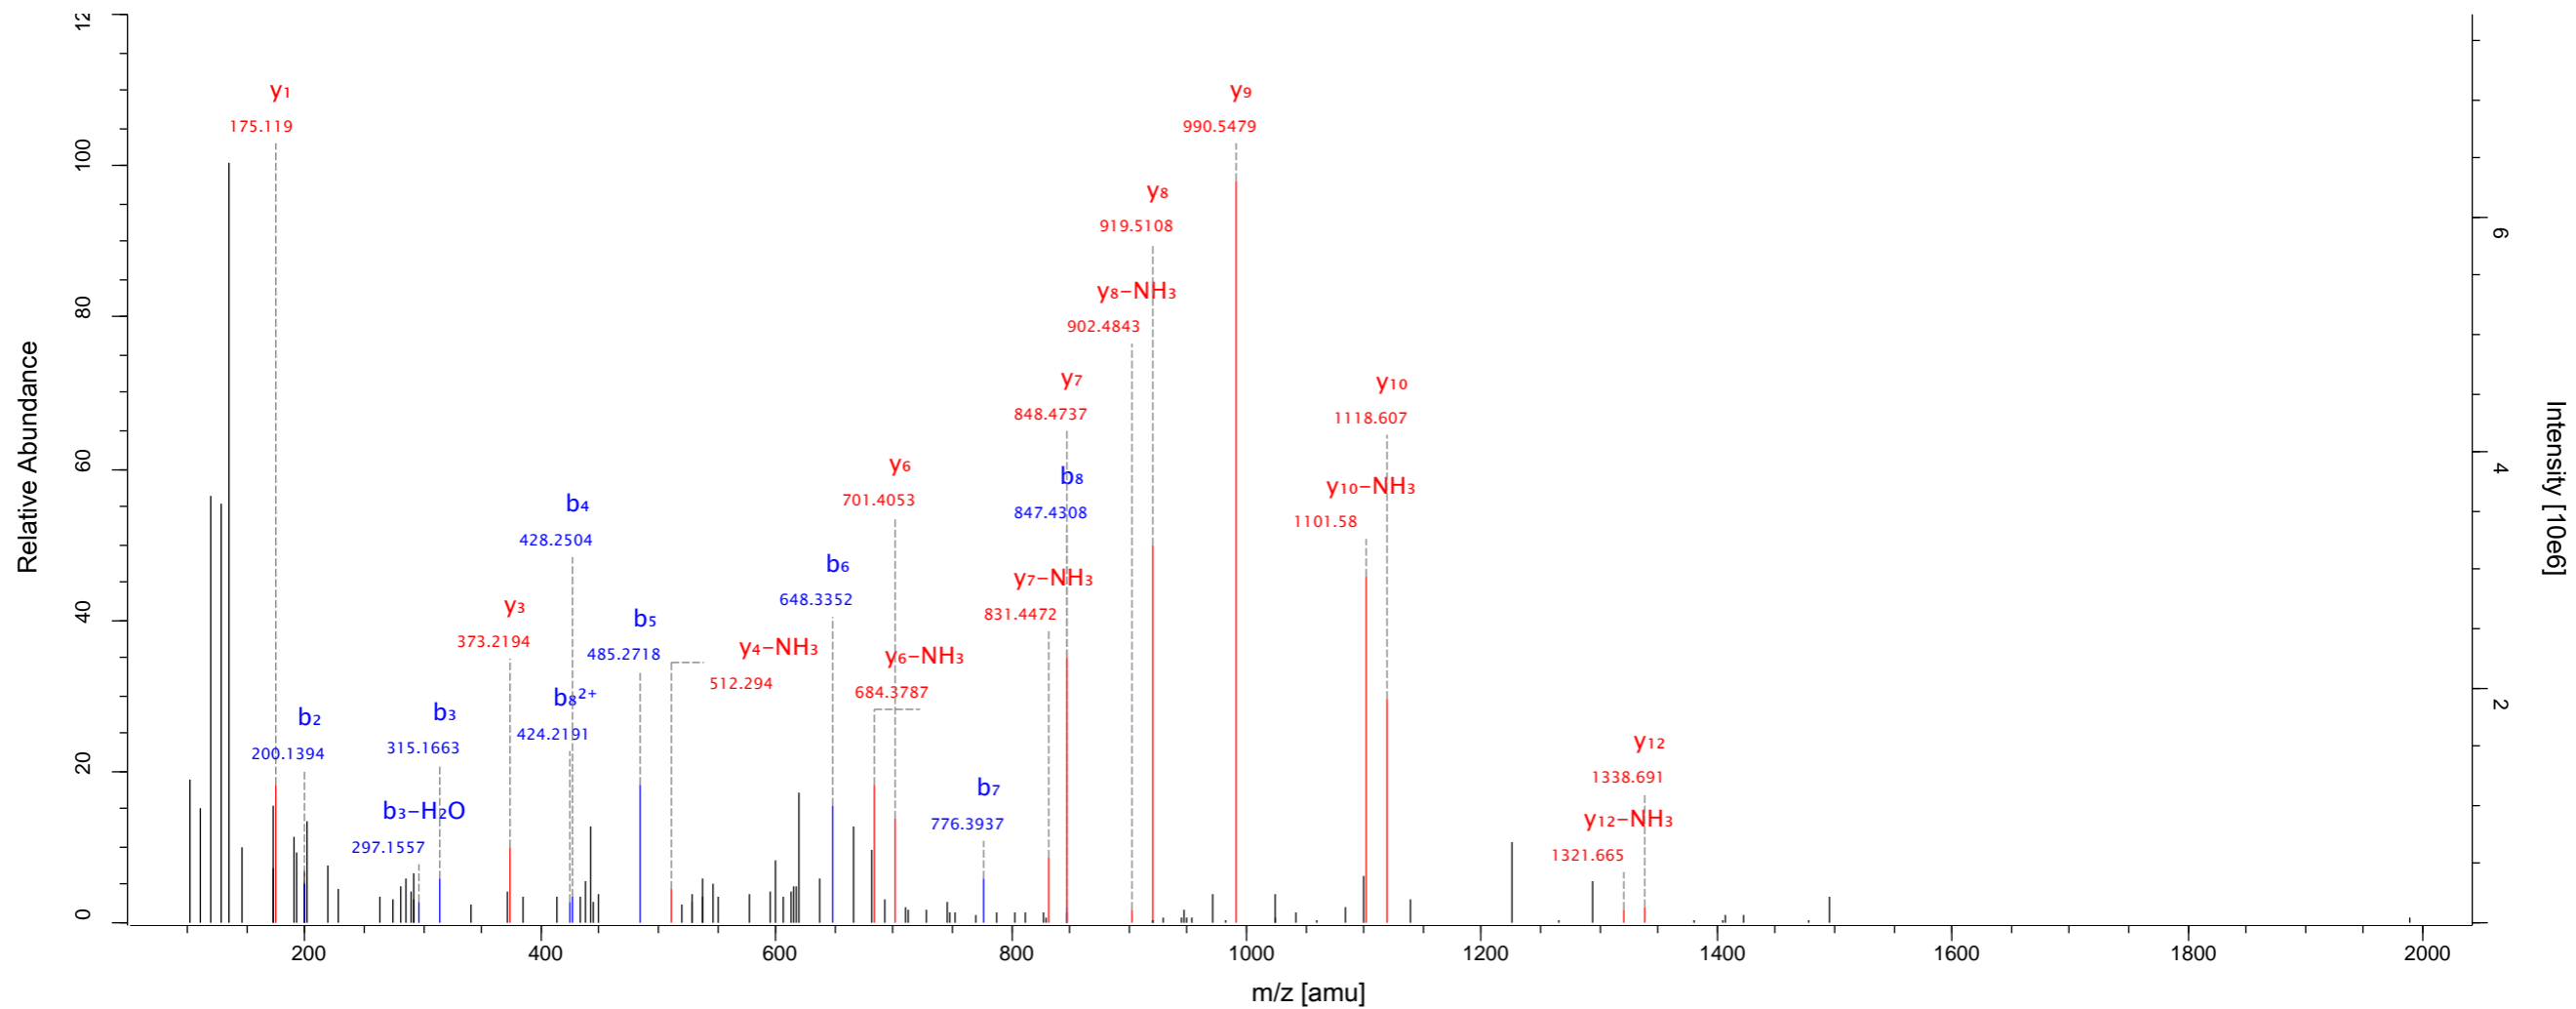

Raw file: 20111212\_EXQ5\_AnMi\_QC\_HCMVp1\_37  
Scan number: 25814  
Protein: ORFL82W + NC\_006273.2[36796,37488]+ <unknown description>  
Peptide score: 113.07  
Method: FTMS; HCD

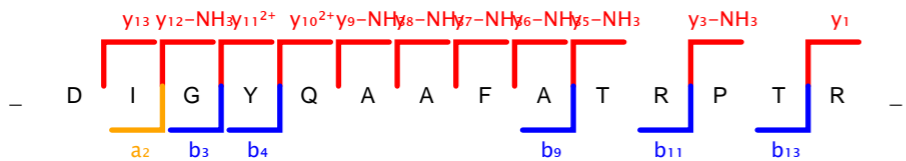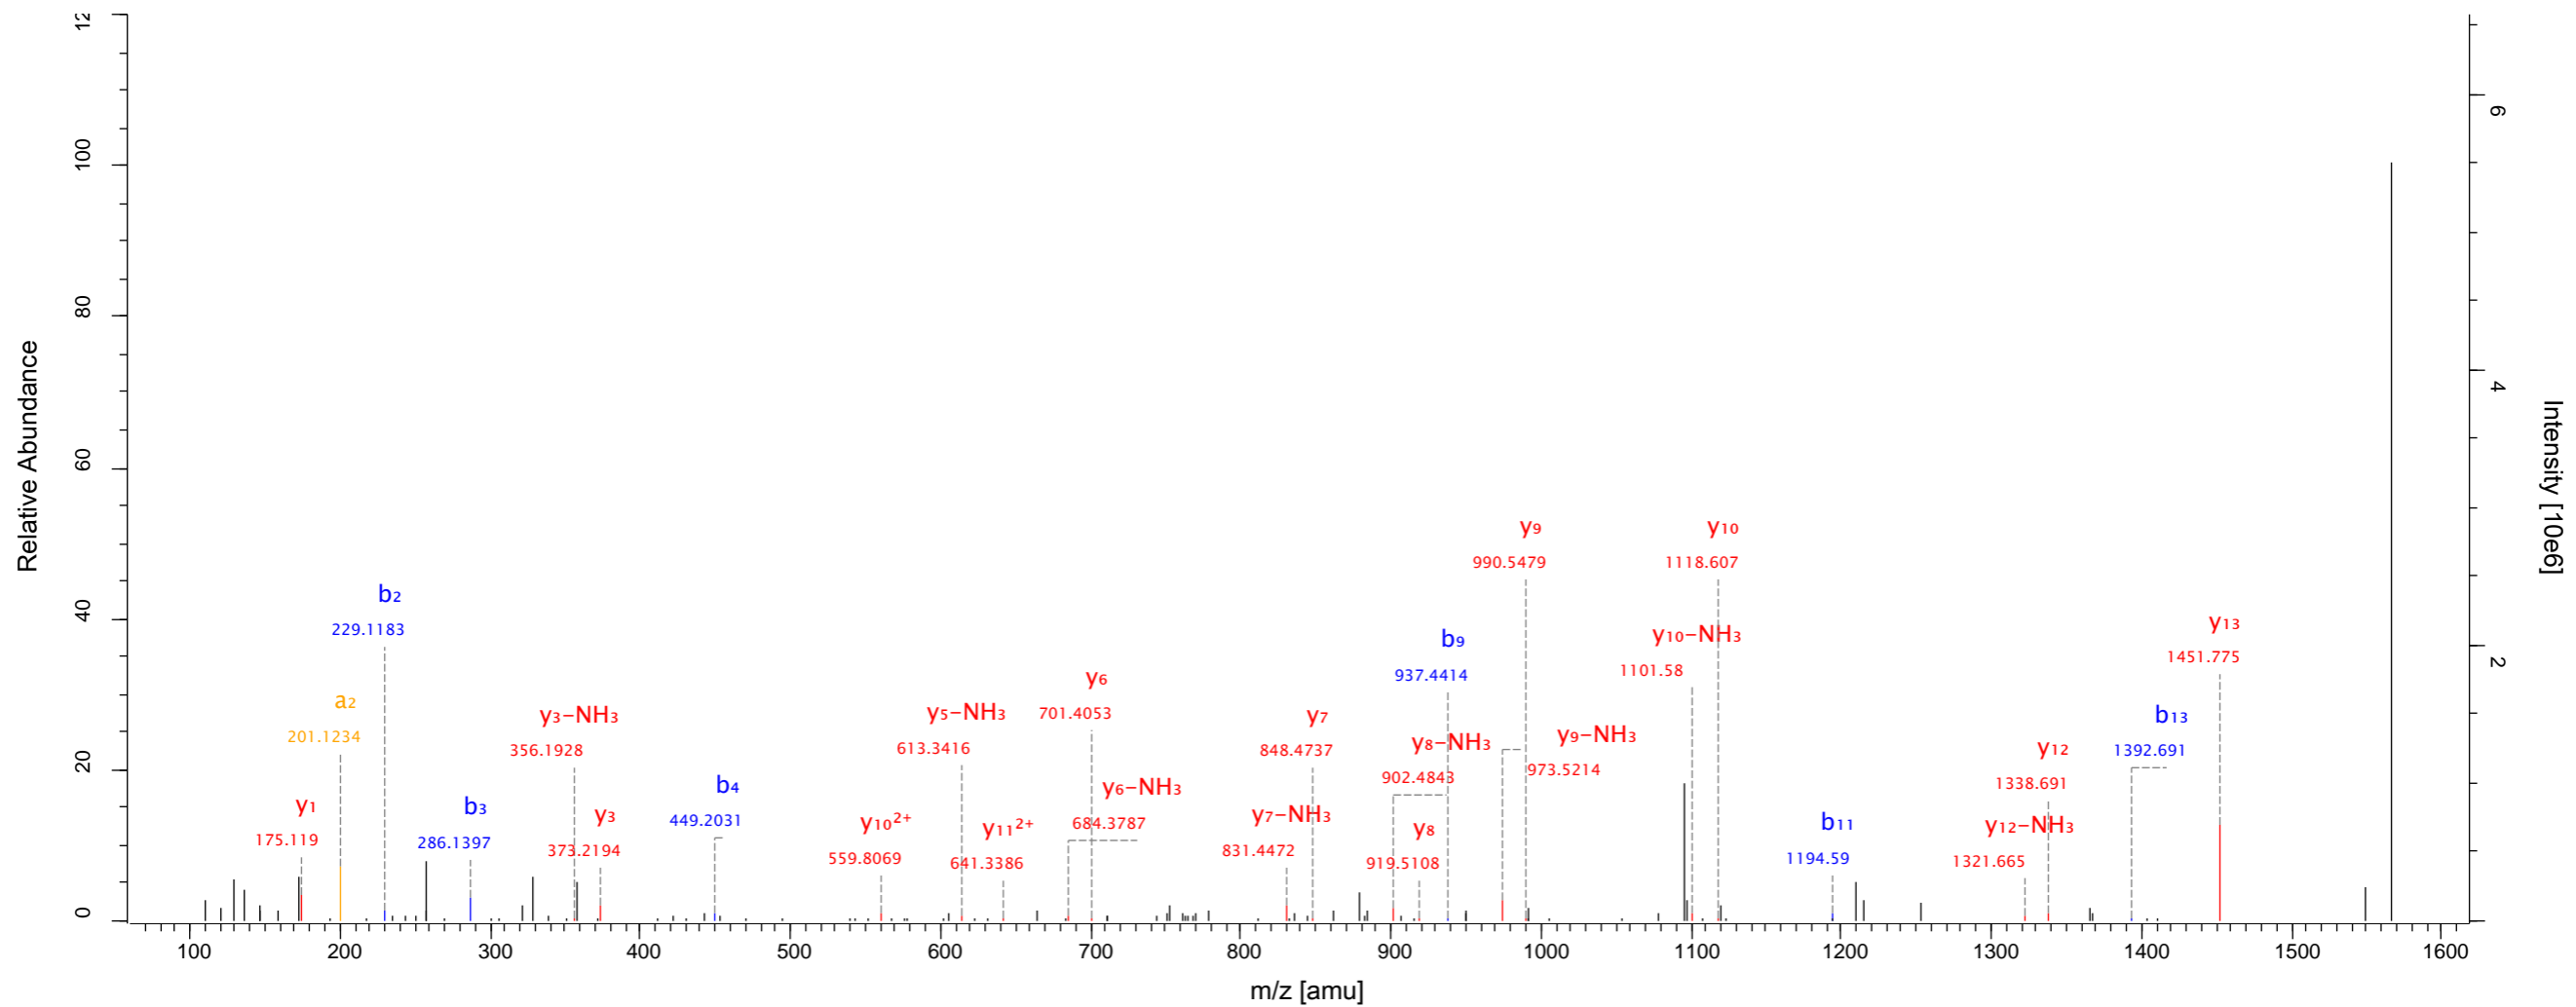



Raw file: 20111212\_EXQ5\_AnMi\_QC\_HCMVp11\_37

Scan number: 38008

Protein: ORFL321W + NC\_006273.2[191968,194126]+ <unknown description>; ORFL321W.iORF1 + NC\_006273.2[191968,194126]+ <unknown description>; ORFL321W.iORF4 + NC\_006273.2[193200,194126]+ <unknown description>

Peptide score: 89.8

Method: FTMS; HCD

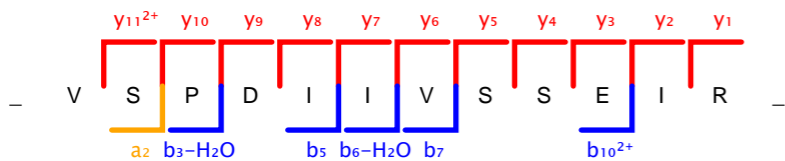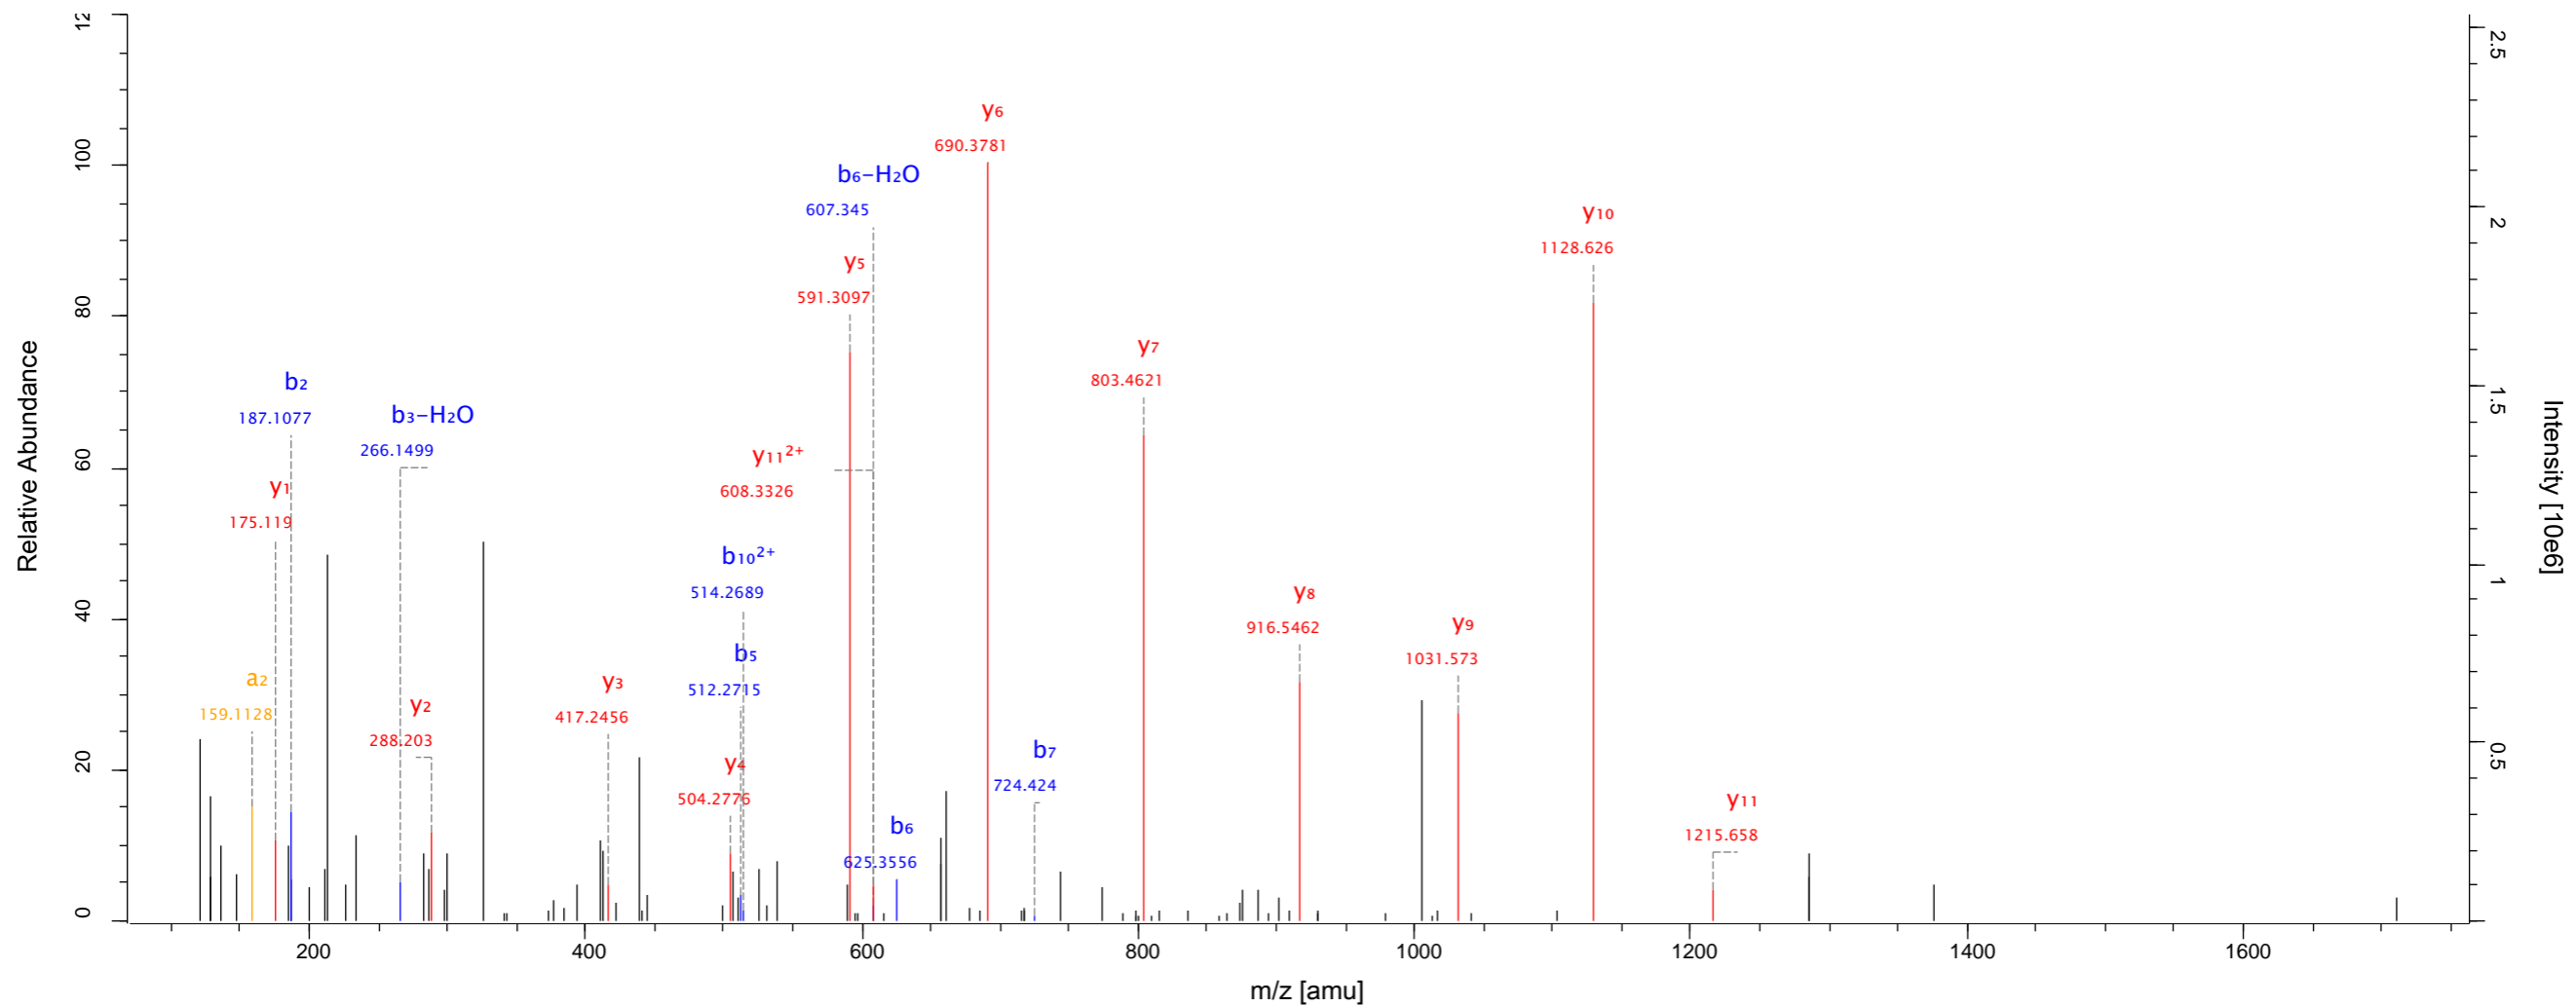

Raw file: 20111212\_EXQ5\_AnMi\_QC\_HCMVp1\_37

Scan number: 38766

Protein: ORFL321W + NC\_006273.2[191968,194126]+ <unknown description>; ORFL321W.iORF1 + NC\_006273.2[191968,194126]+ <unknown description>; ORFL321W.iORF4 + NC\_006273.2[193200,194126]+ <unknown description>

Peptide score: 114.02

Method: FTMS; HCD

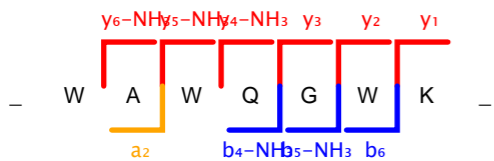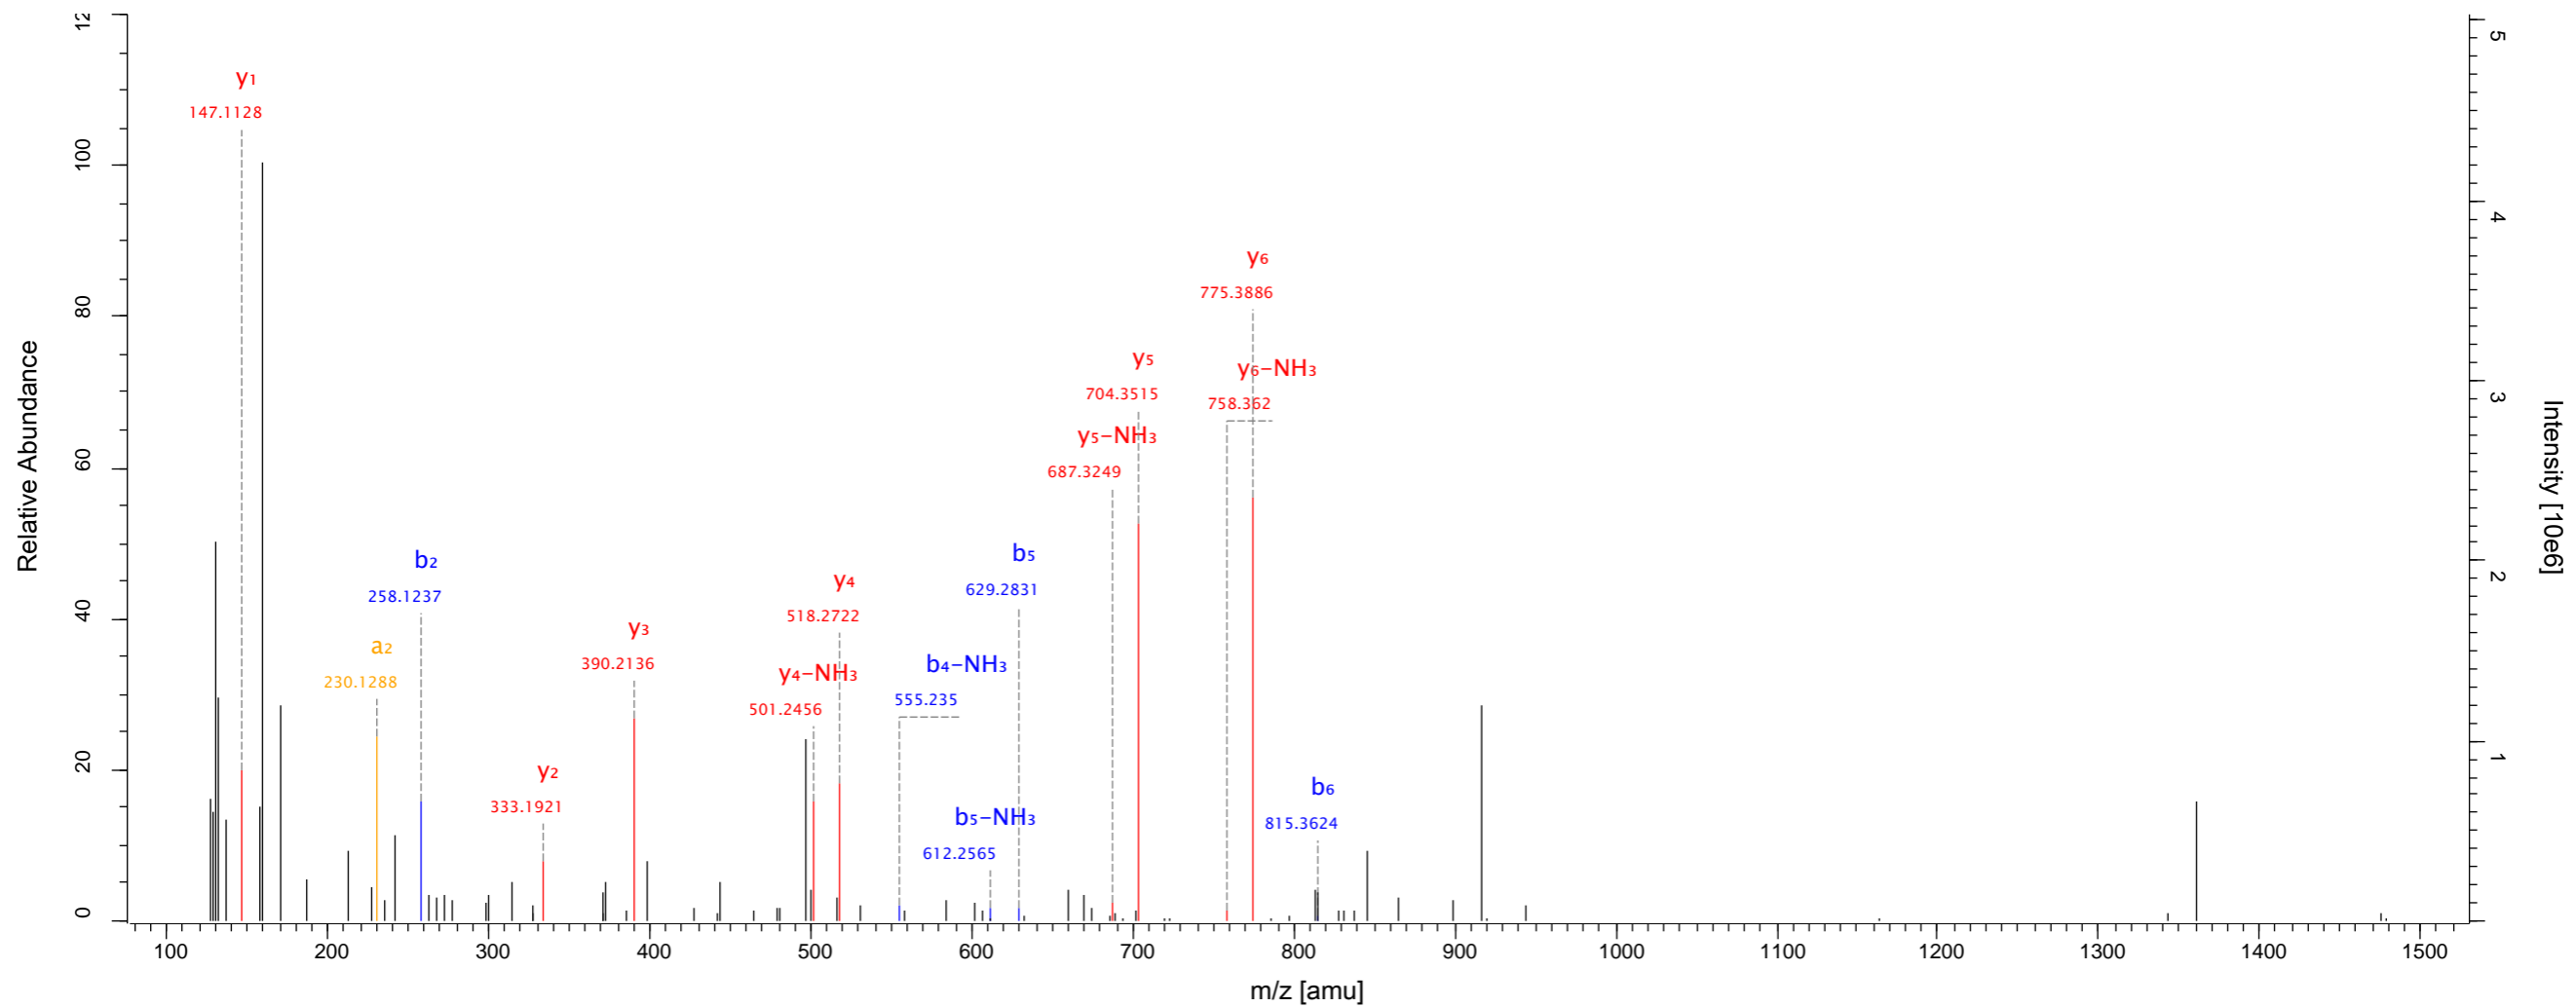

Raw file: 20111212\_EXQ5\_AnMi\_QC\_HCMVp1\_37  
 Scan number: 5805  
 Protein: ORFL103C - NC\_006273.2[52569,53060]- <unknown description>  
 Peptide score: 199.68  
 Method: FTMS; HCD

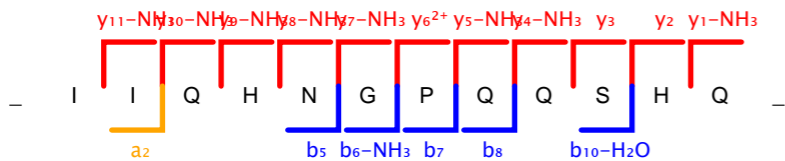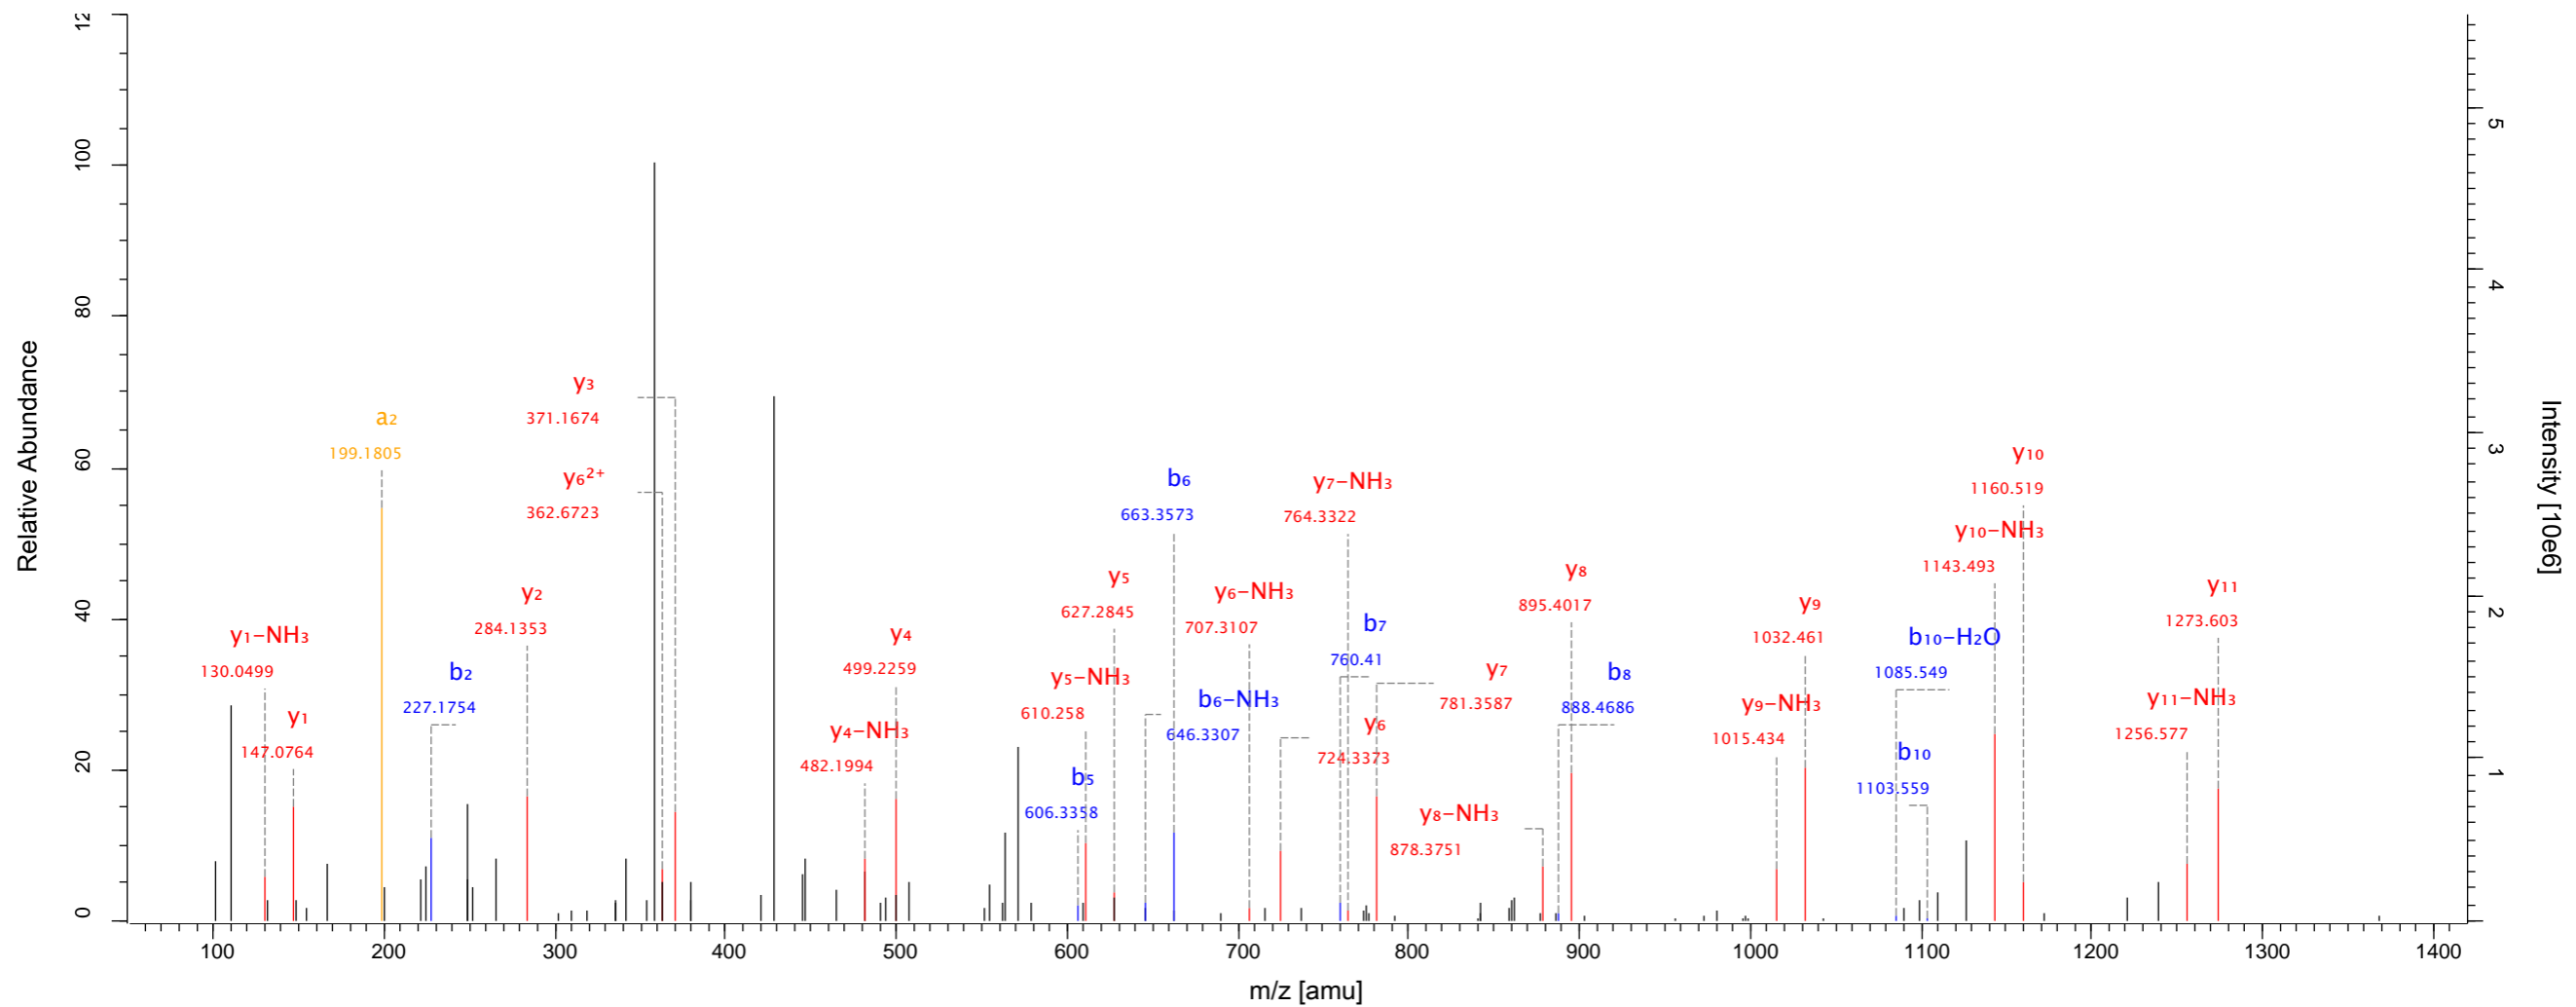

Raw file: 20111212\_EXQ5\_AnMi\_QC\_HCMVp1\_39  
Scan number: 10768  
Protein: ORFL147C - NC\_006273.2[85932,87362]- <unknown description>  
Peptide score: 130.66  
Method: FTMS; HCD

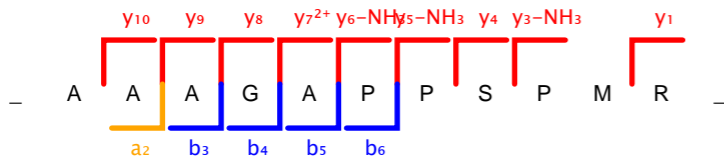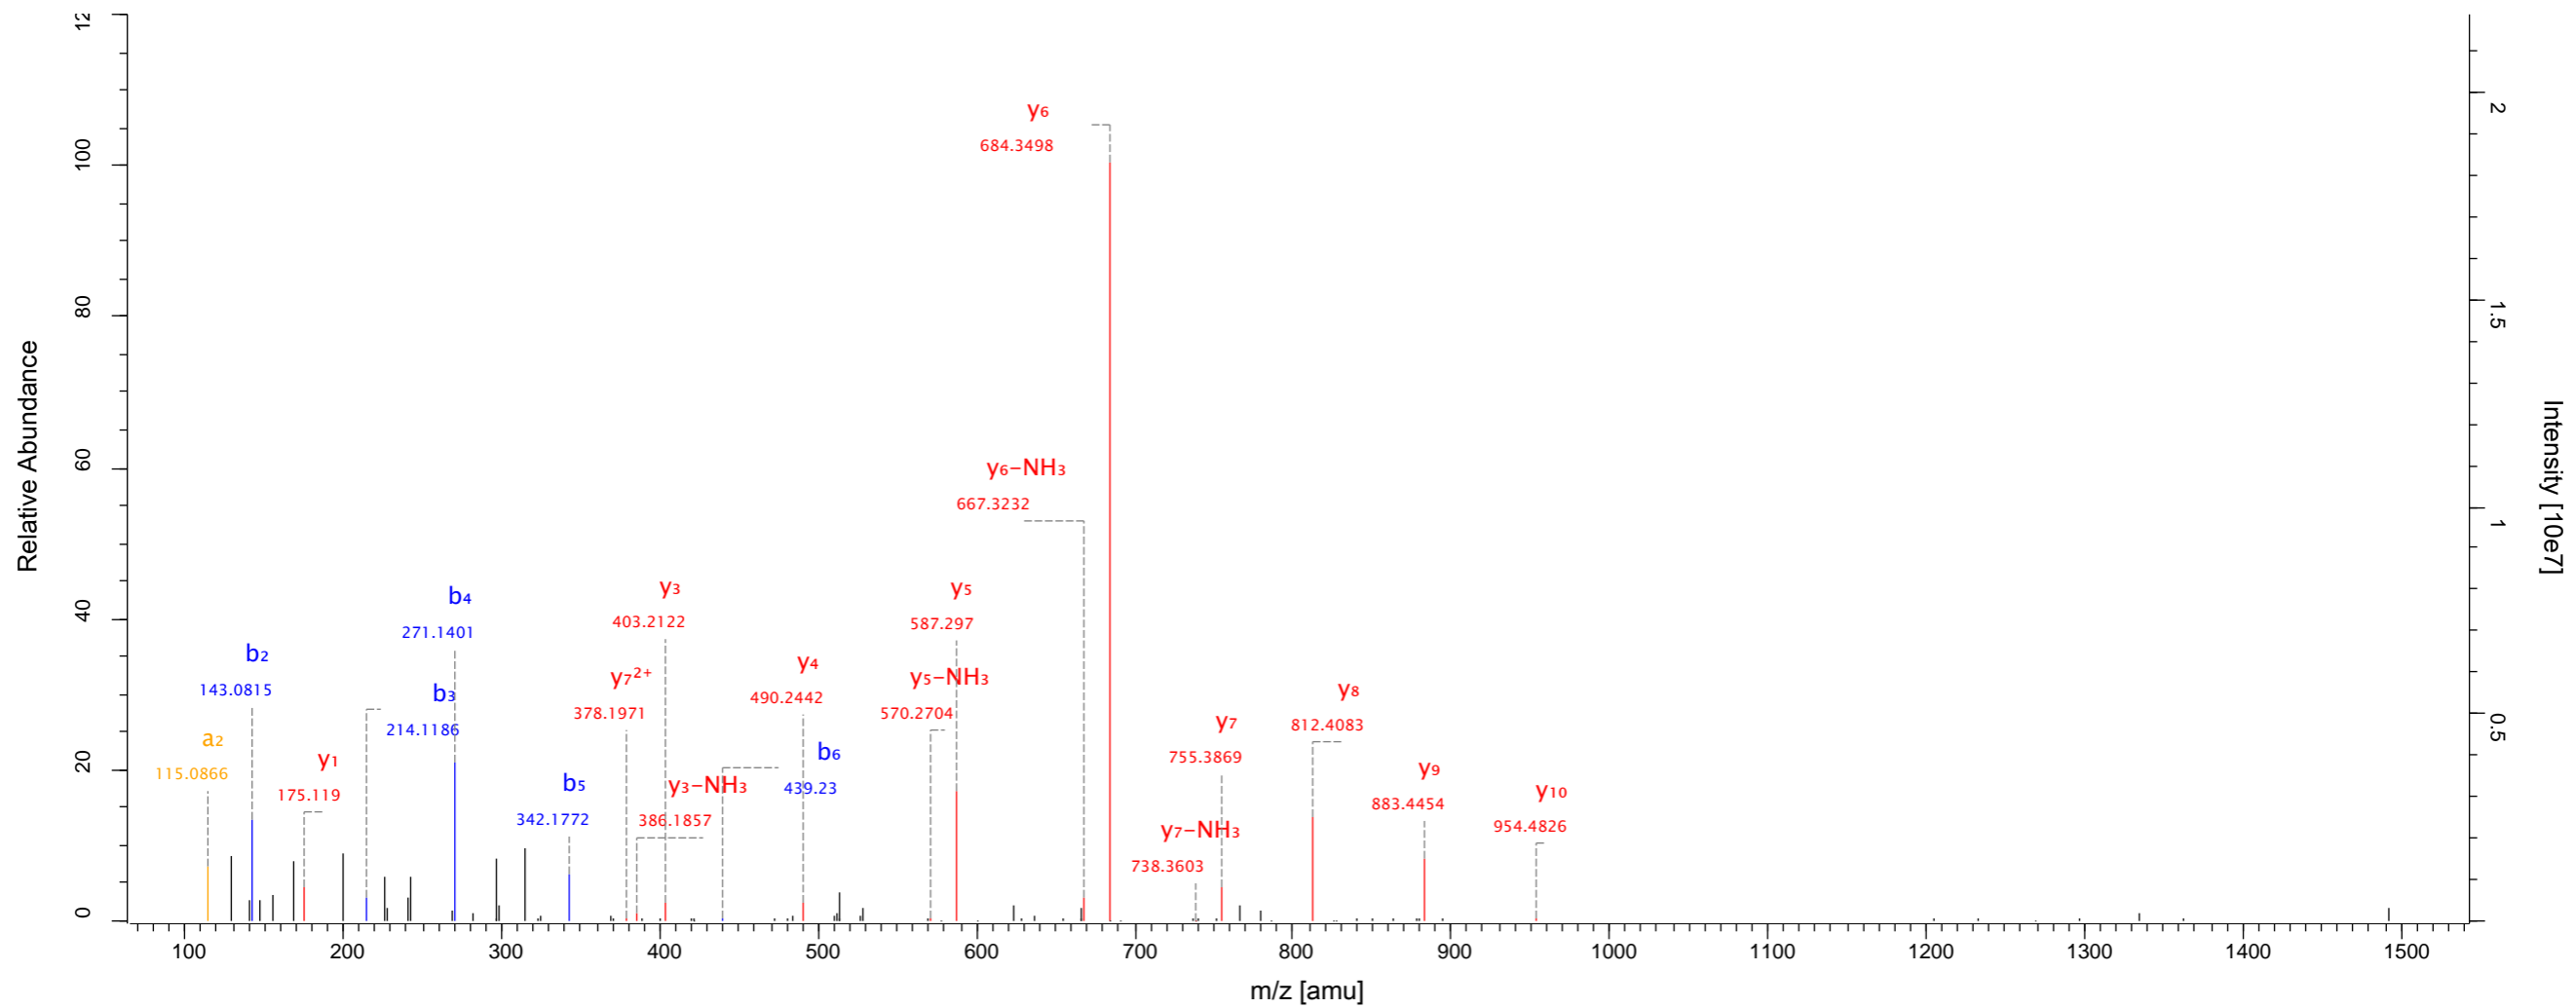

Raw file: 20111212\_EXQ5\_AnMi\_QC\_HCMVp1\_39  
Scan number: 14803  
Protein: ORFL147C - NC\_006273.2[85932,87362]- <unknown description>  
Peptide score: 101.33  
Method: FTMS; HCD

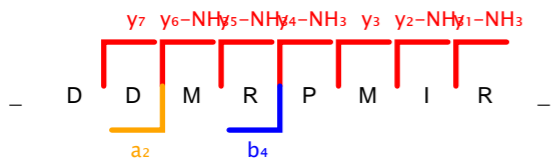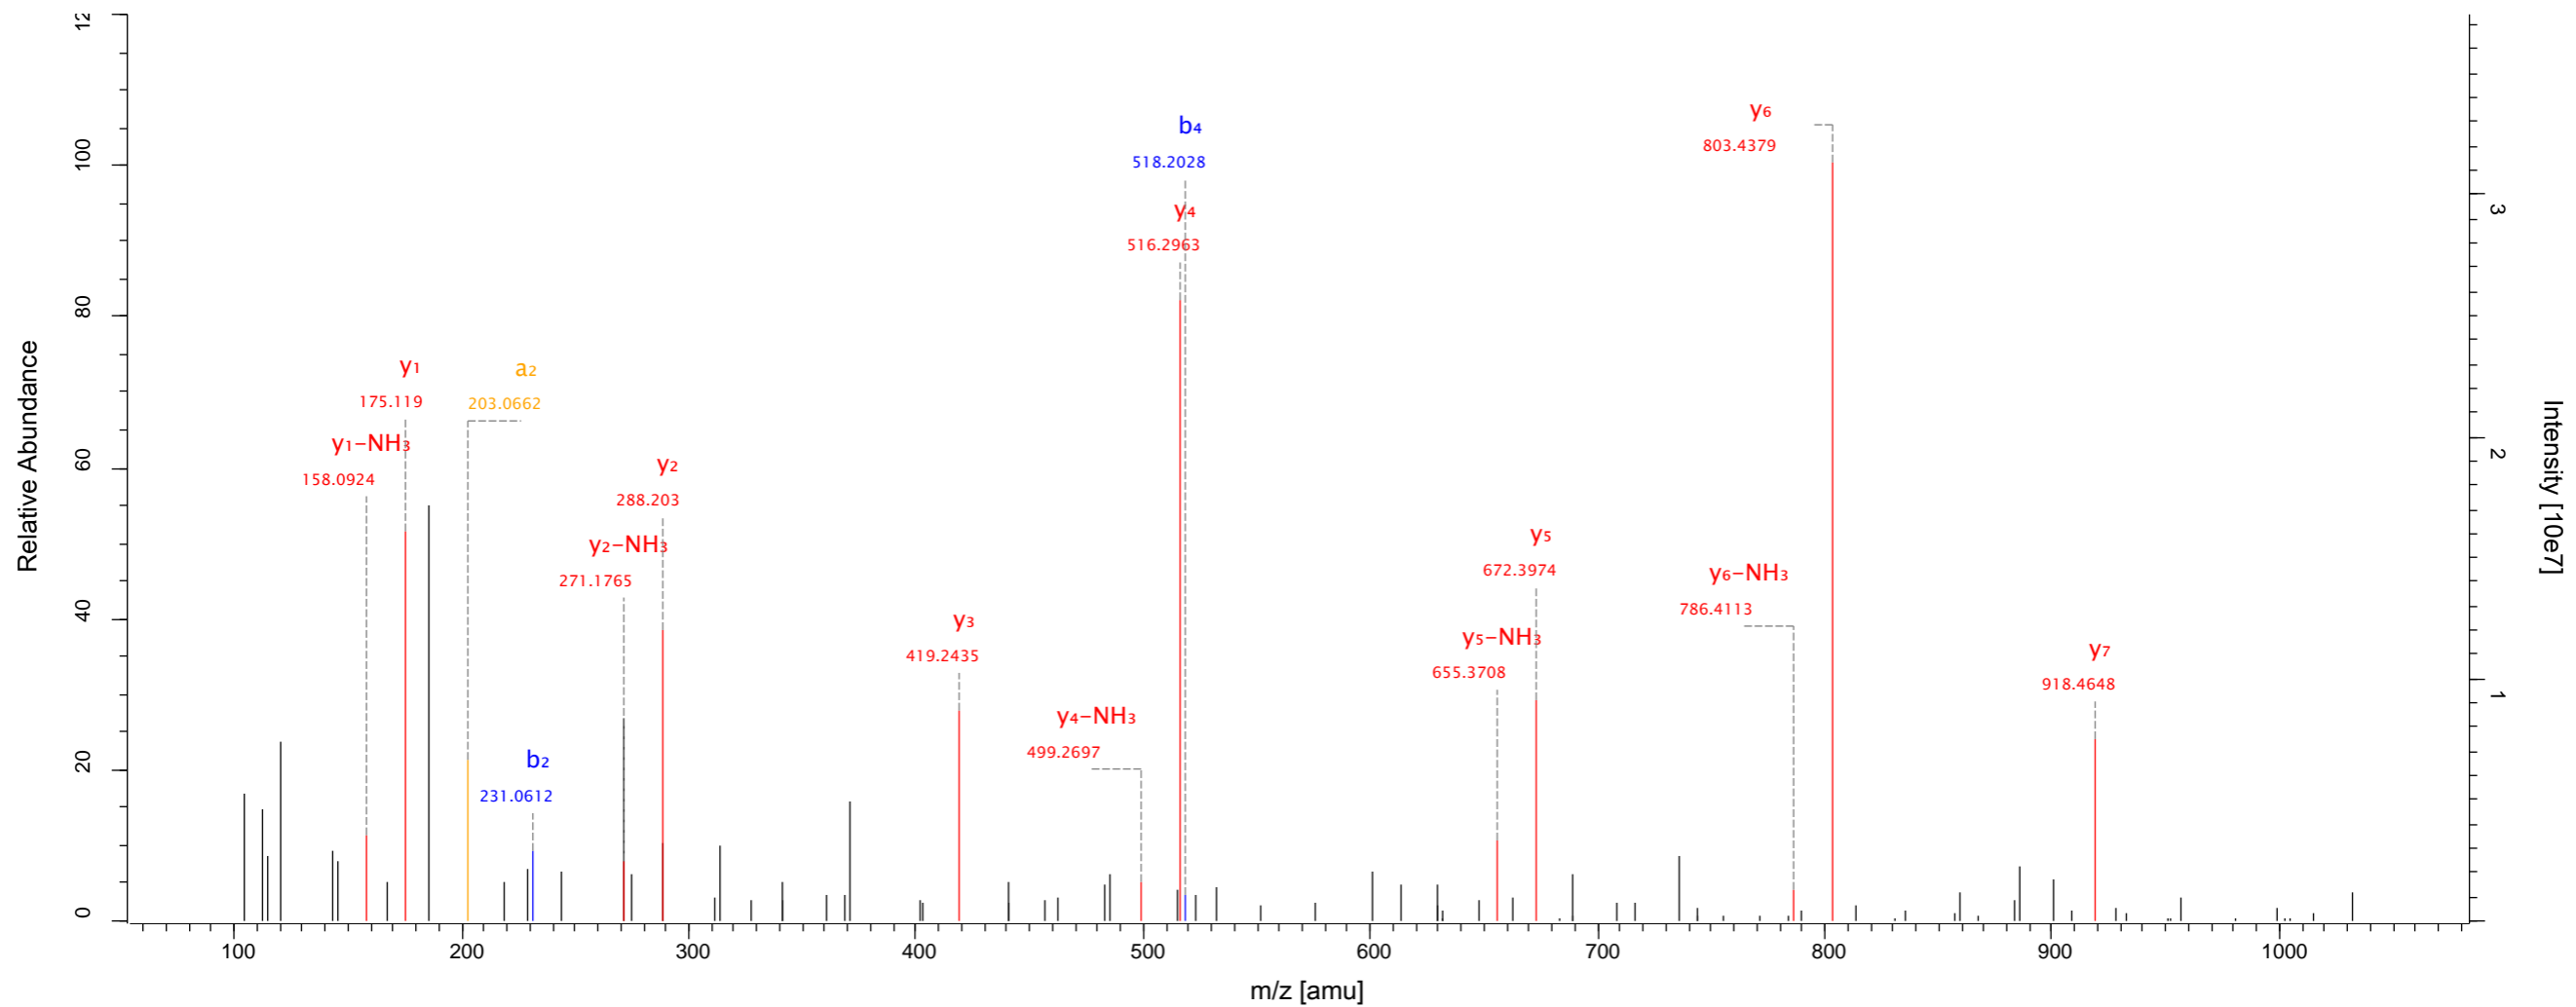

Raw file: 20111212\_EXQ5\_AnMi\_QC\_HCMVp1\_39  
 Scan number: 16094  
 Protein: ORFL147C - NC\_006273.2[85932,87362]- <unknown description>  
 Peptide score: 126.29  
 Method: FTMS; HCD

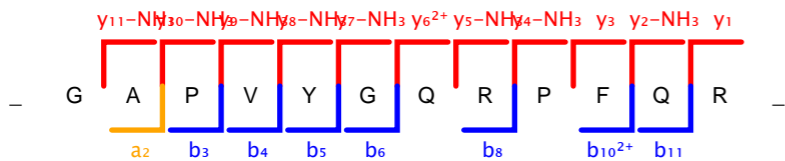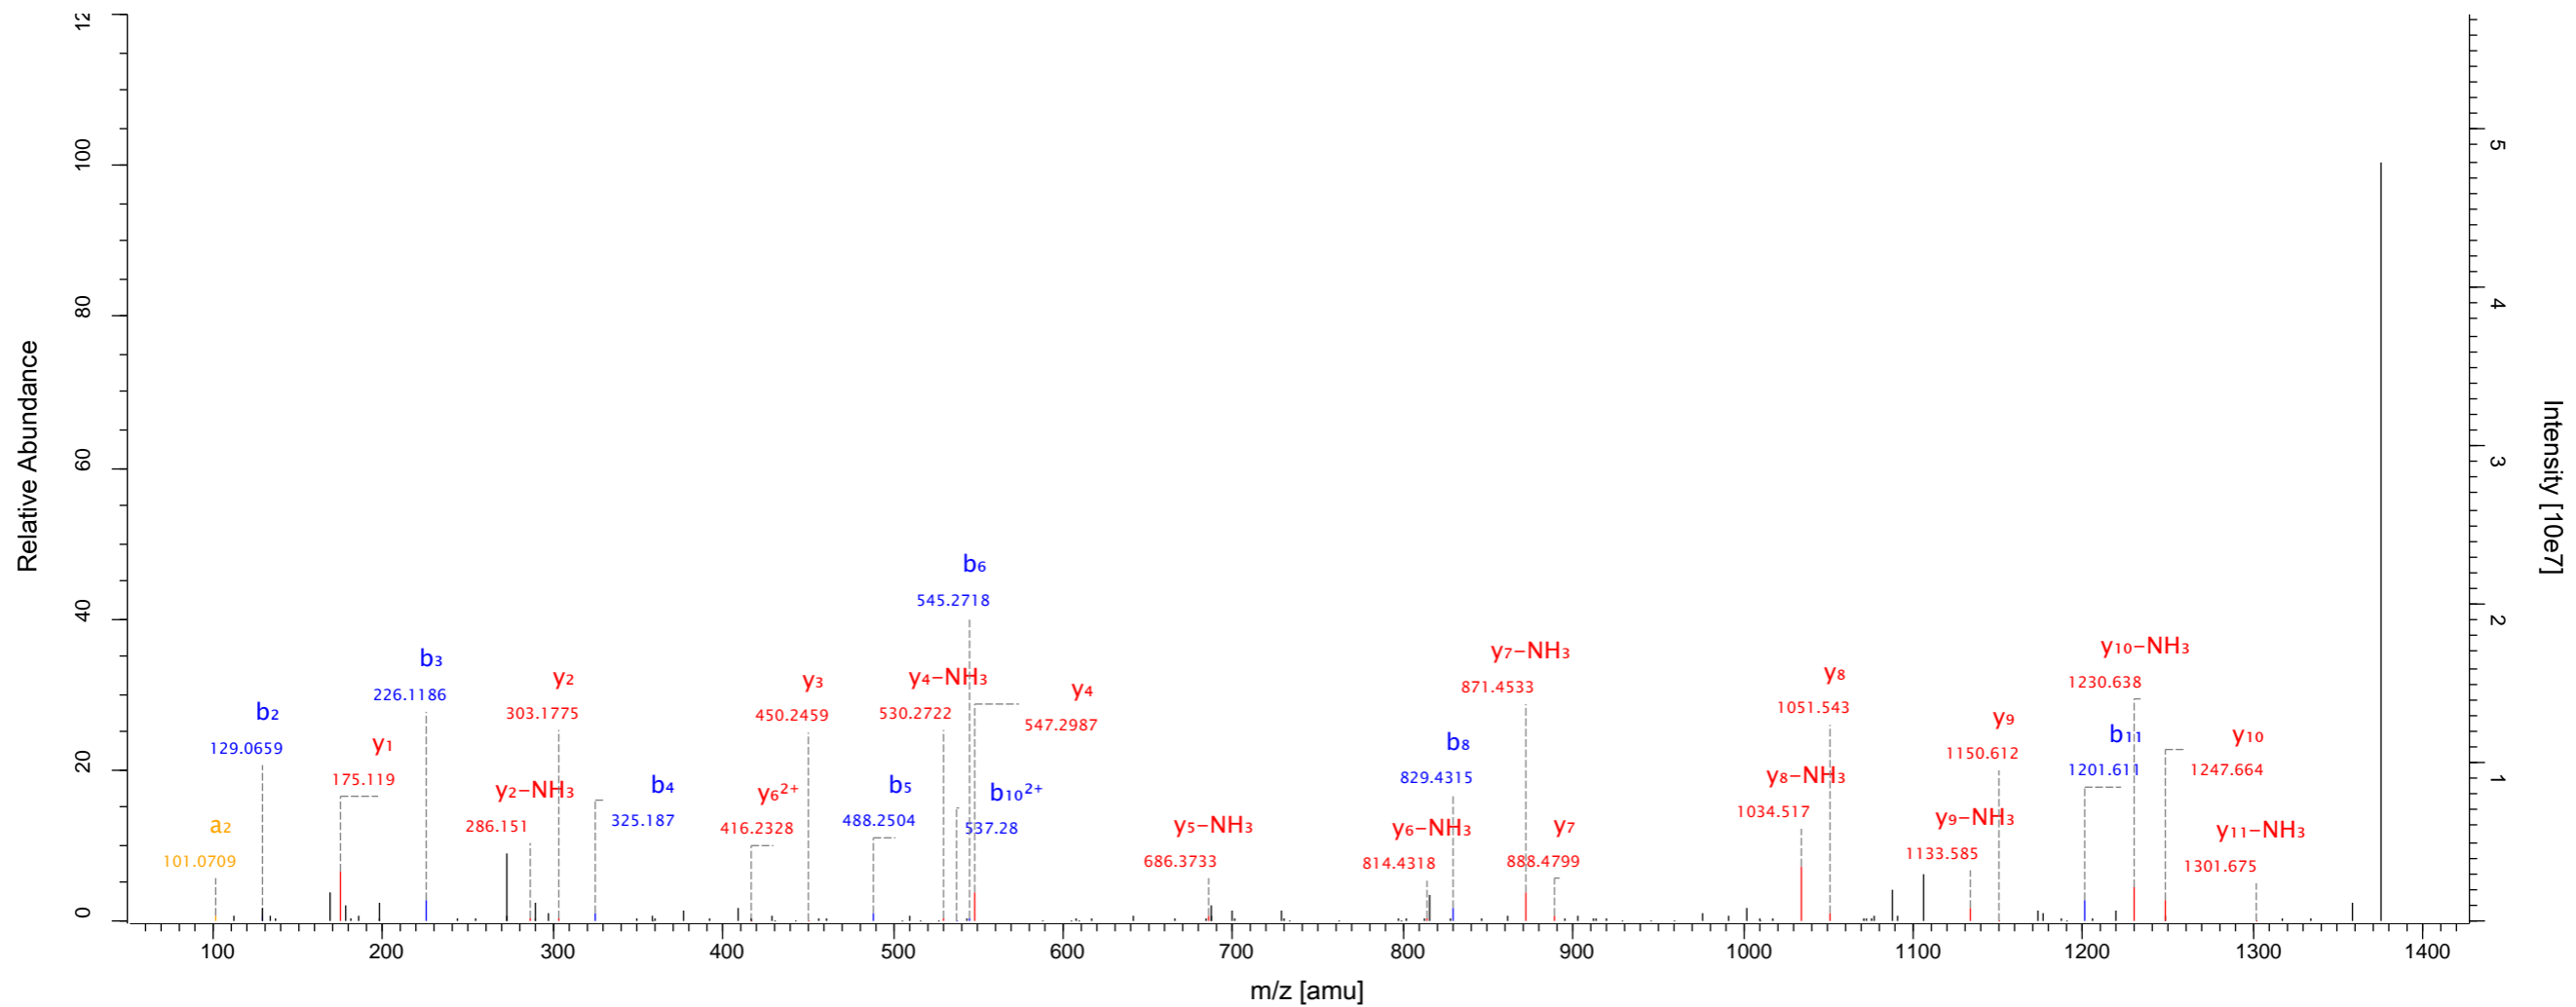

Raw file: 20111212\_EXQ5\_AnMi\_QC\_HCMVp1\_39  
Scan number: 3538  
Protein: ORFL147C - NC\_006273.2[85932,87362]- <unknown description>  
Peptide score: 106.68  
Method: FTMS; HCD

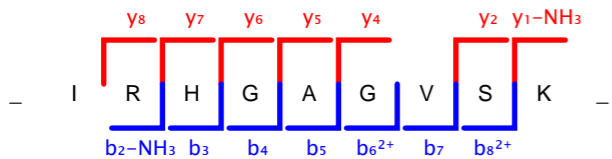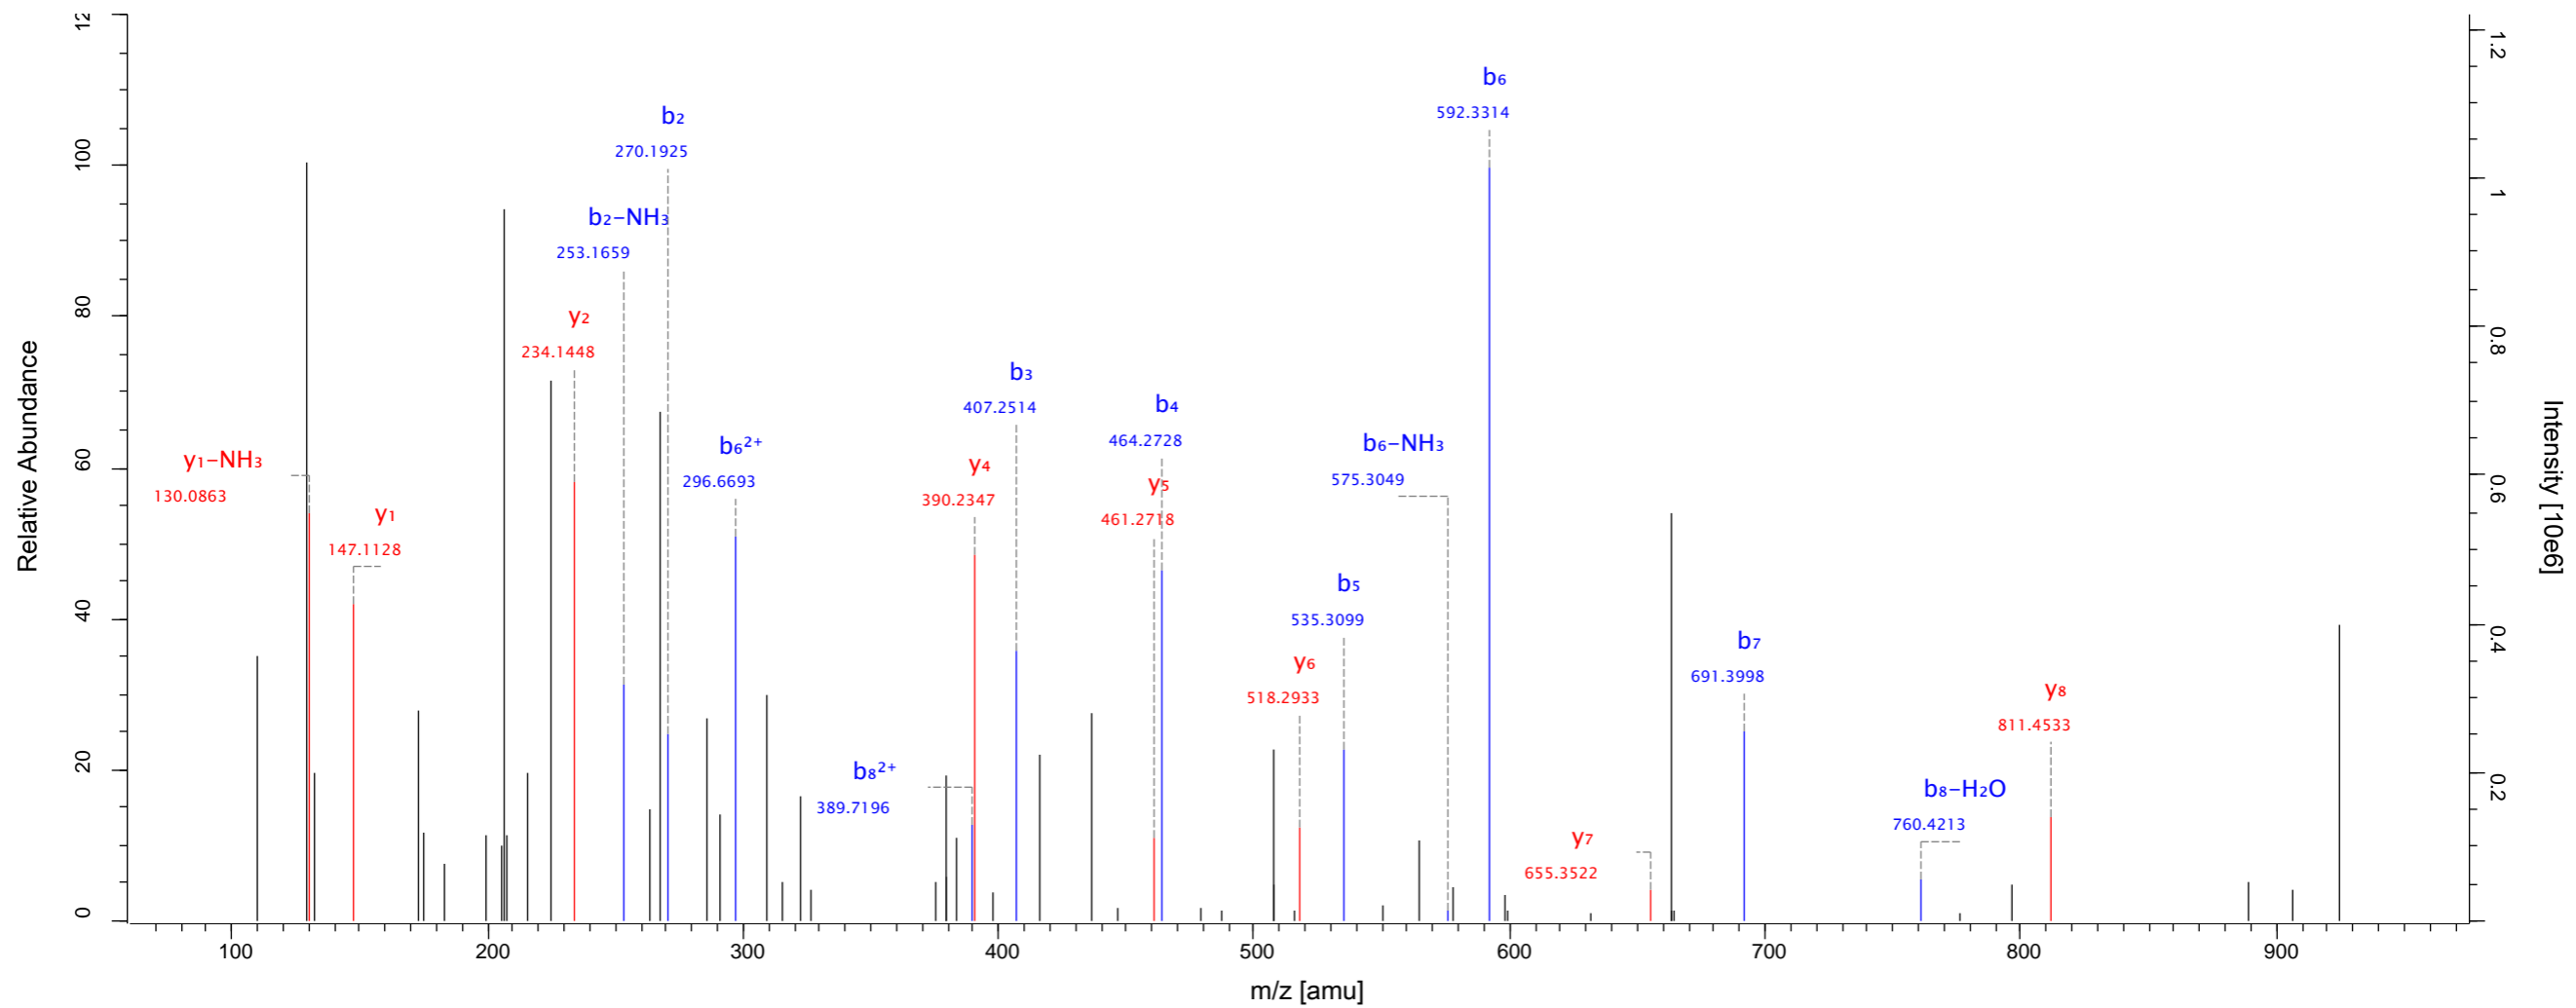

Raw file: 20111212\_EXQ5\_AnMi\_QC\_HCMVp1\_39  
 Scan number: 36859  
 Protein: ORFL147C - NC\_006273.2[85932,87362]- <unknown description>  
 Peptide score: 229.56  
 Method: FTMS; HCD

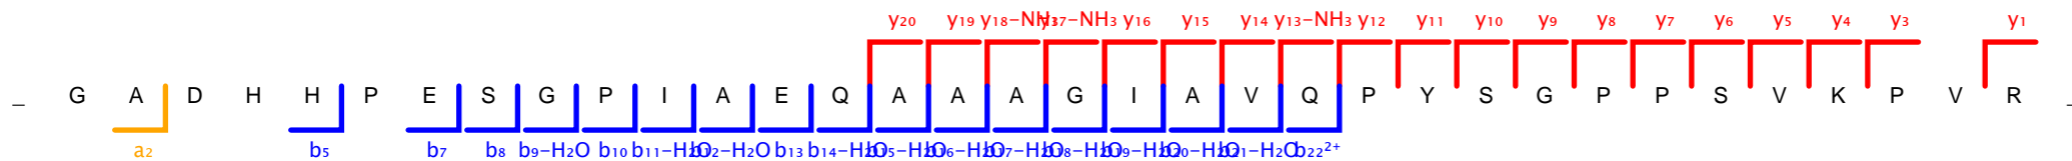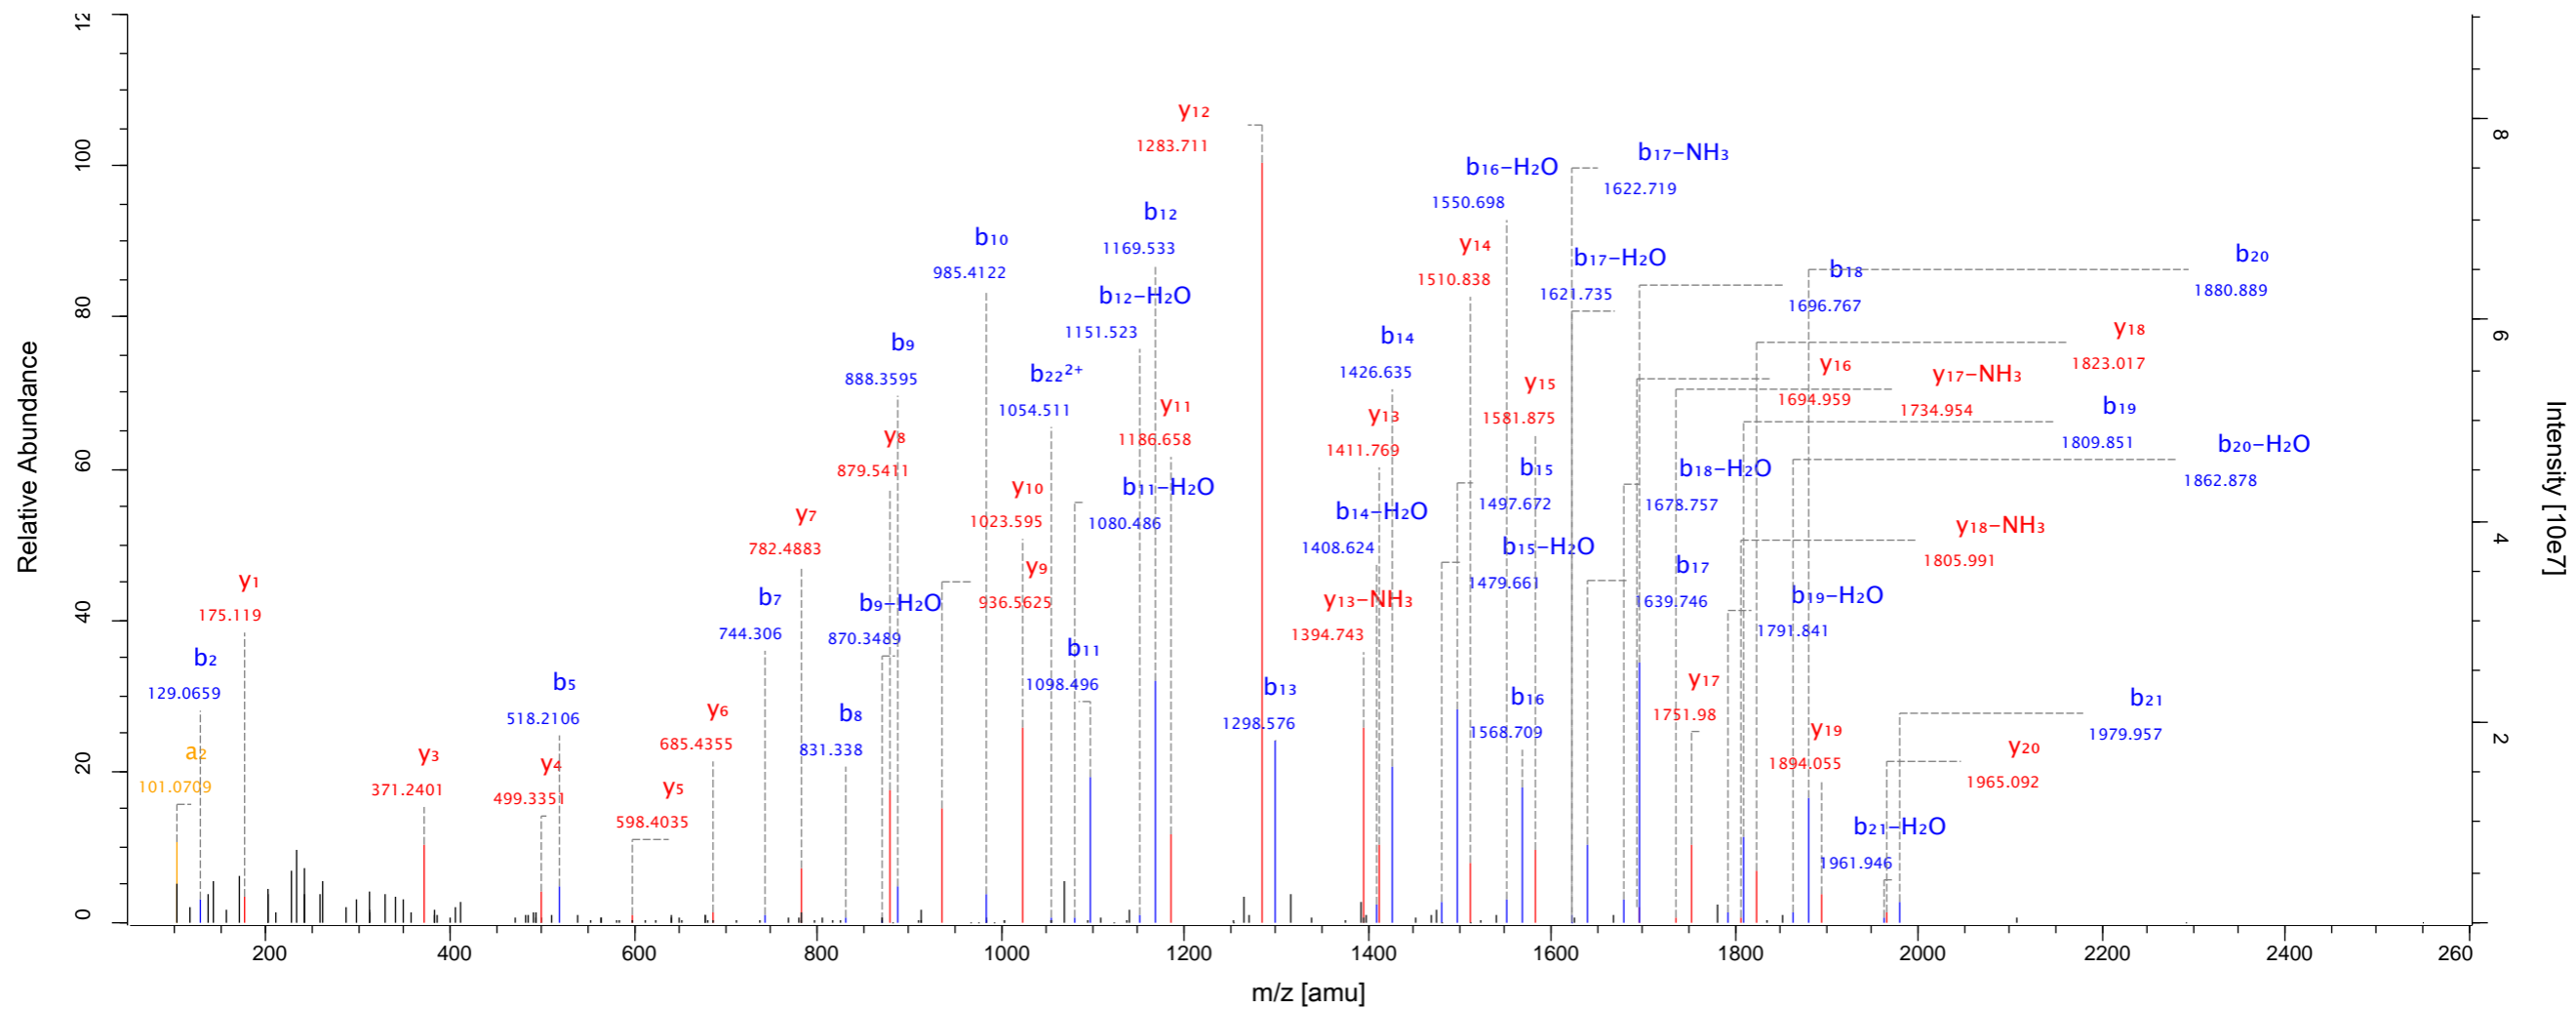



Raw file: 20111212\_EXQ5\_AnMi\_QC\_HCMVp1\_39  
 Scan number: 59976  
 Protein: ORFL147C - NC\_006273.2[85932,87362]- <unknown description>  
 Peptide score: 198.56  
 Method: FTMS; HCD

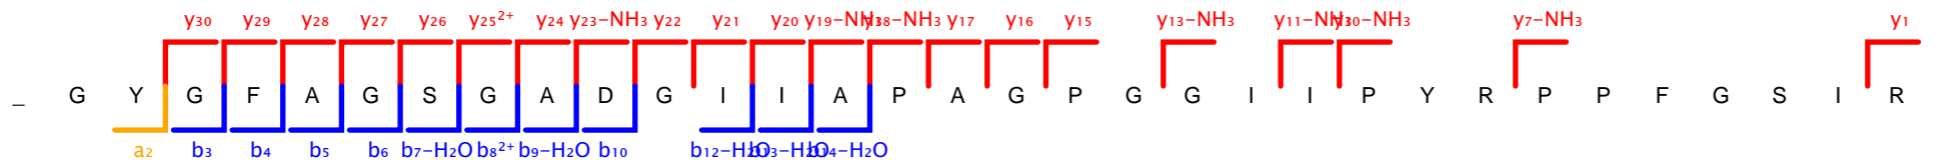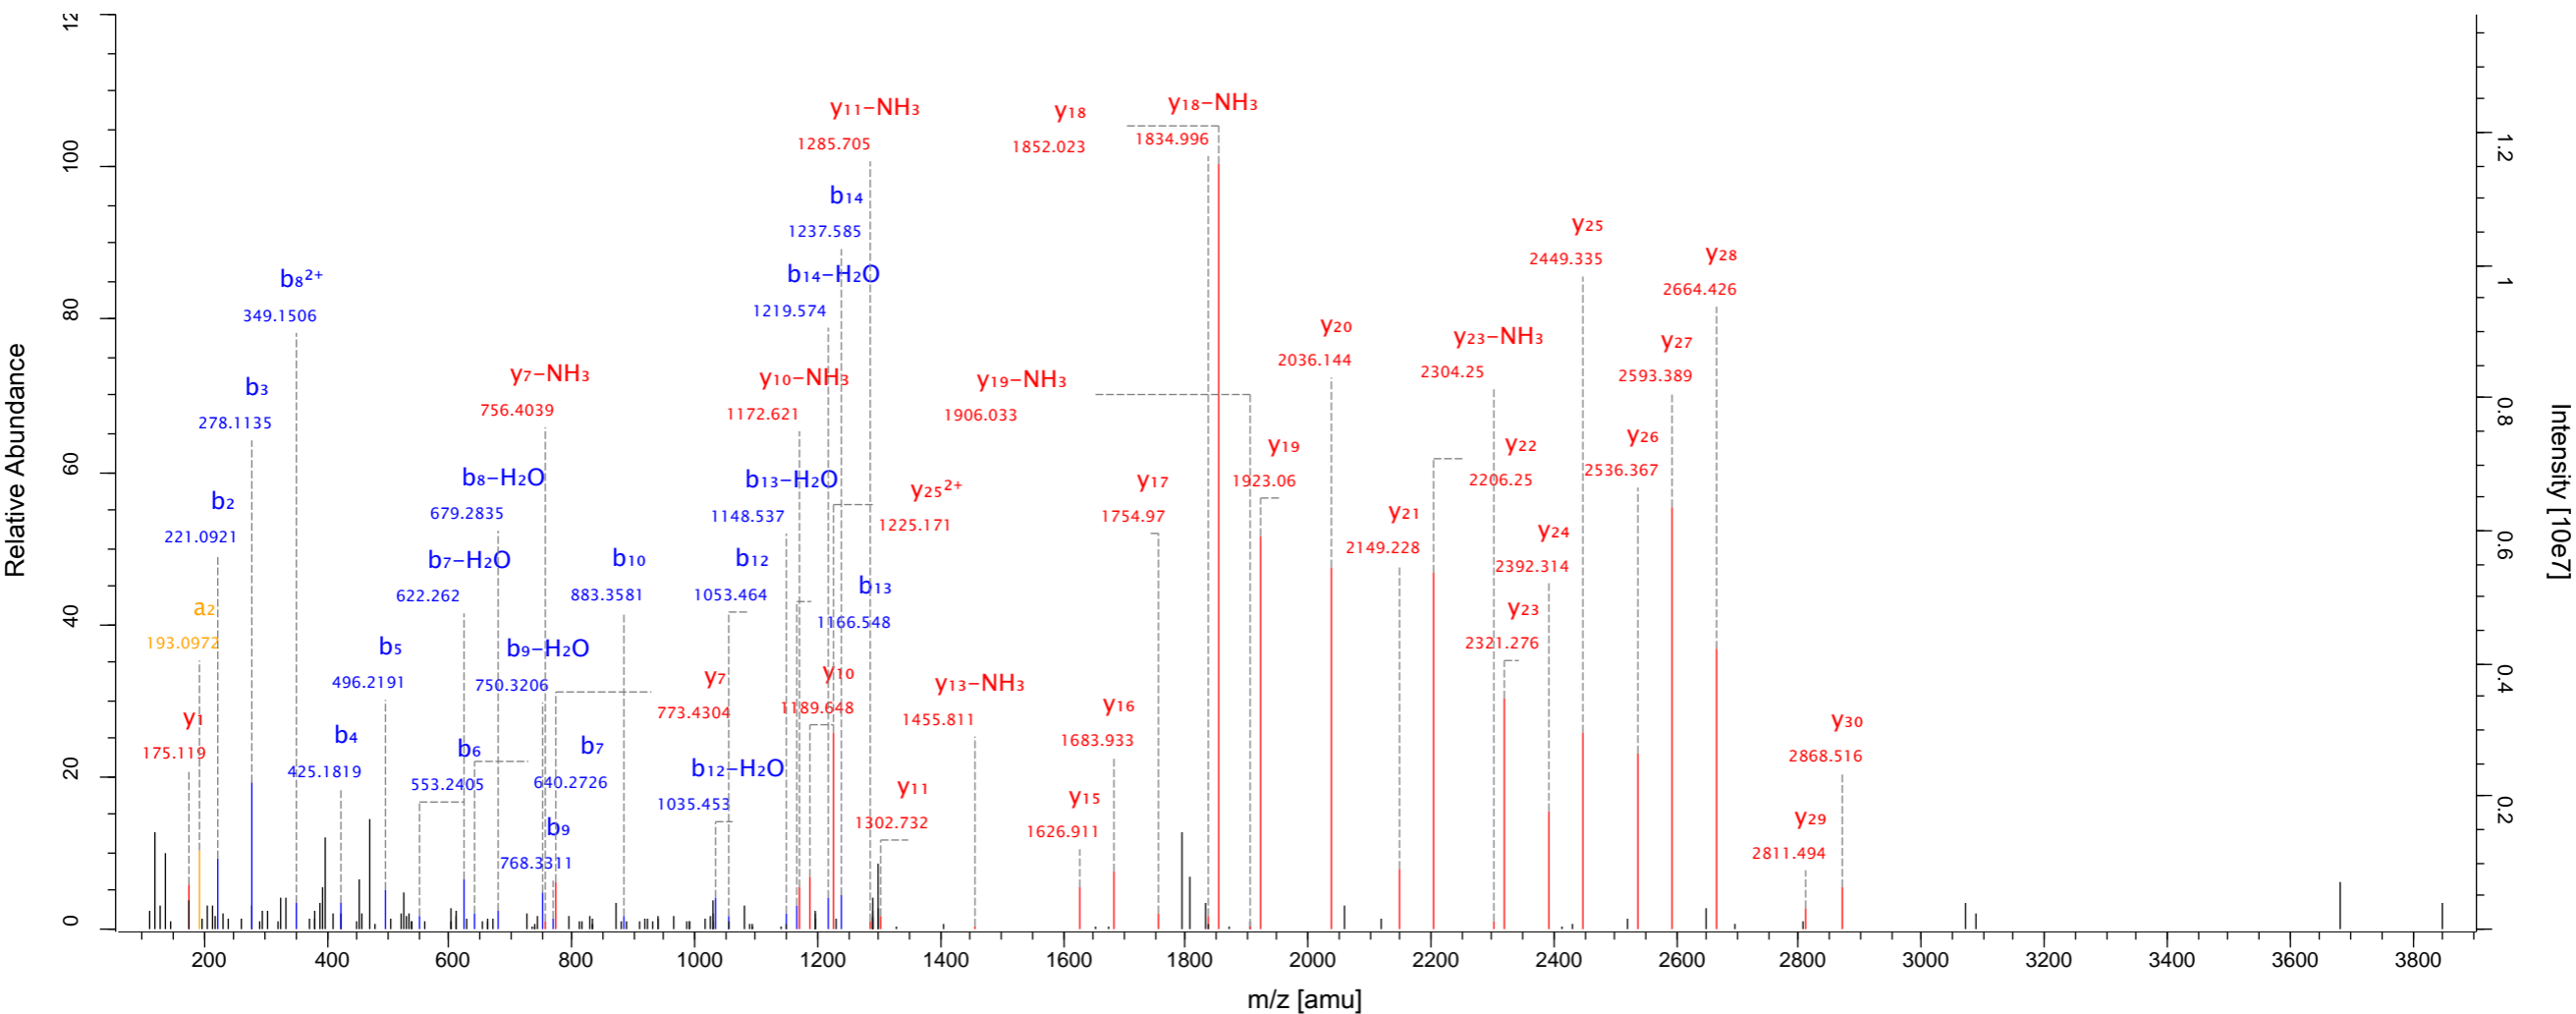

Raw file: 20111212\_EXQ5\_AnMi\_QC\_HCMVp1\_39  
 Scan number: 6480  
 Protein: ORFL147C - NC\_006273.2[85932,87362]- <unknown description>  
 Peptide score: 106.38  
 Method: FTMS; HCD

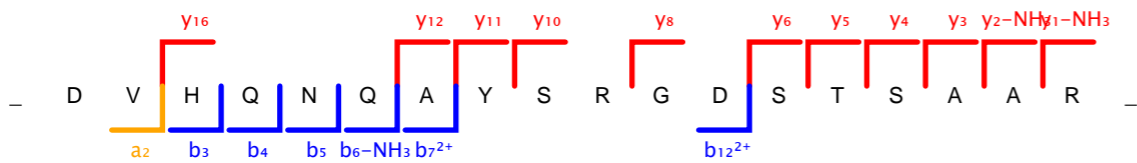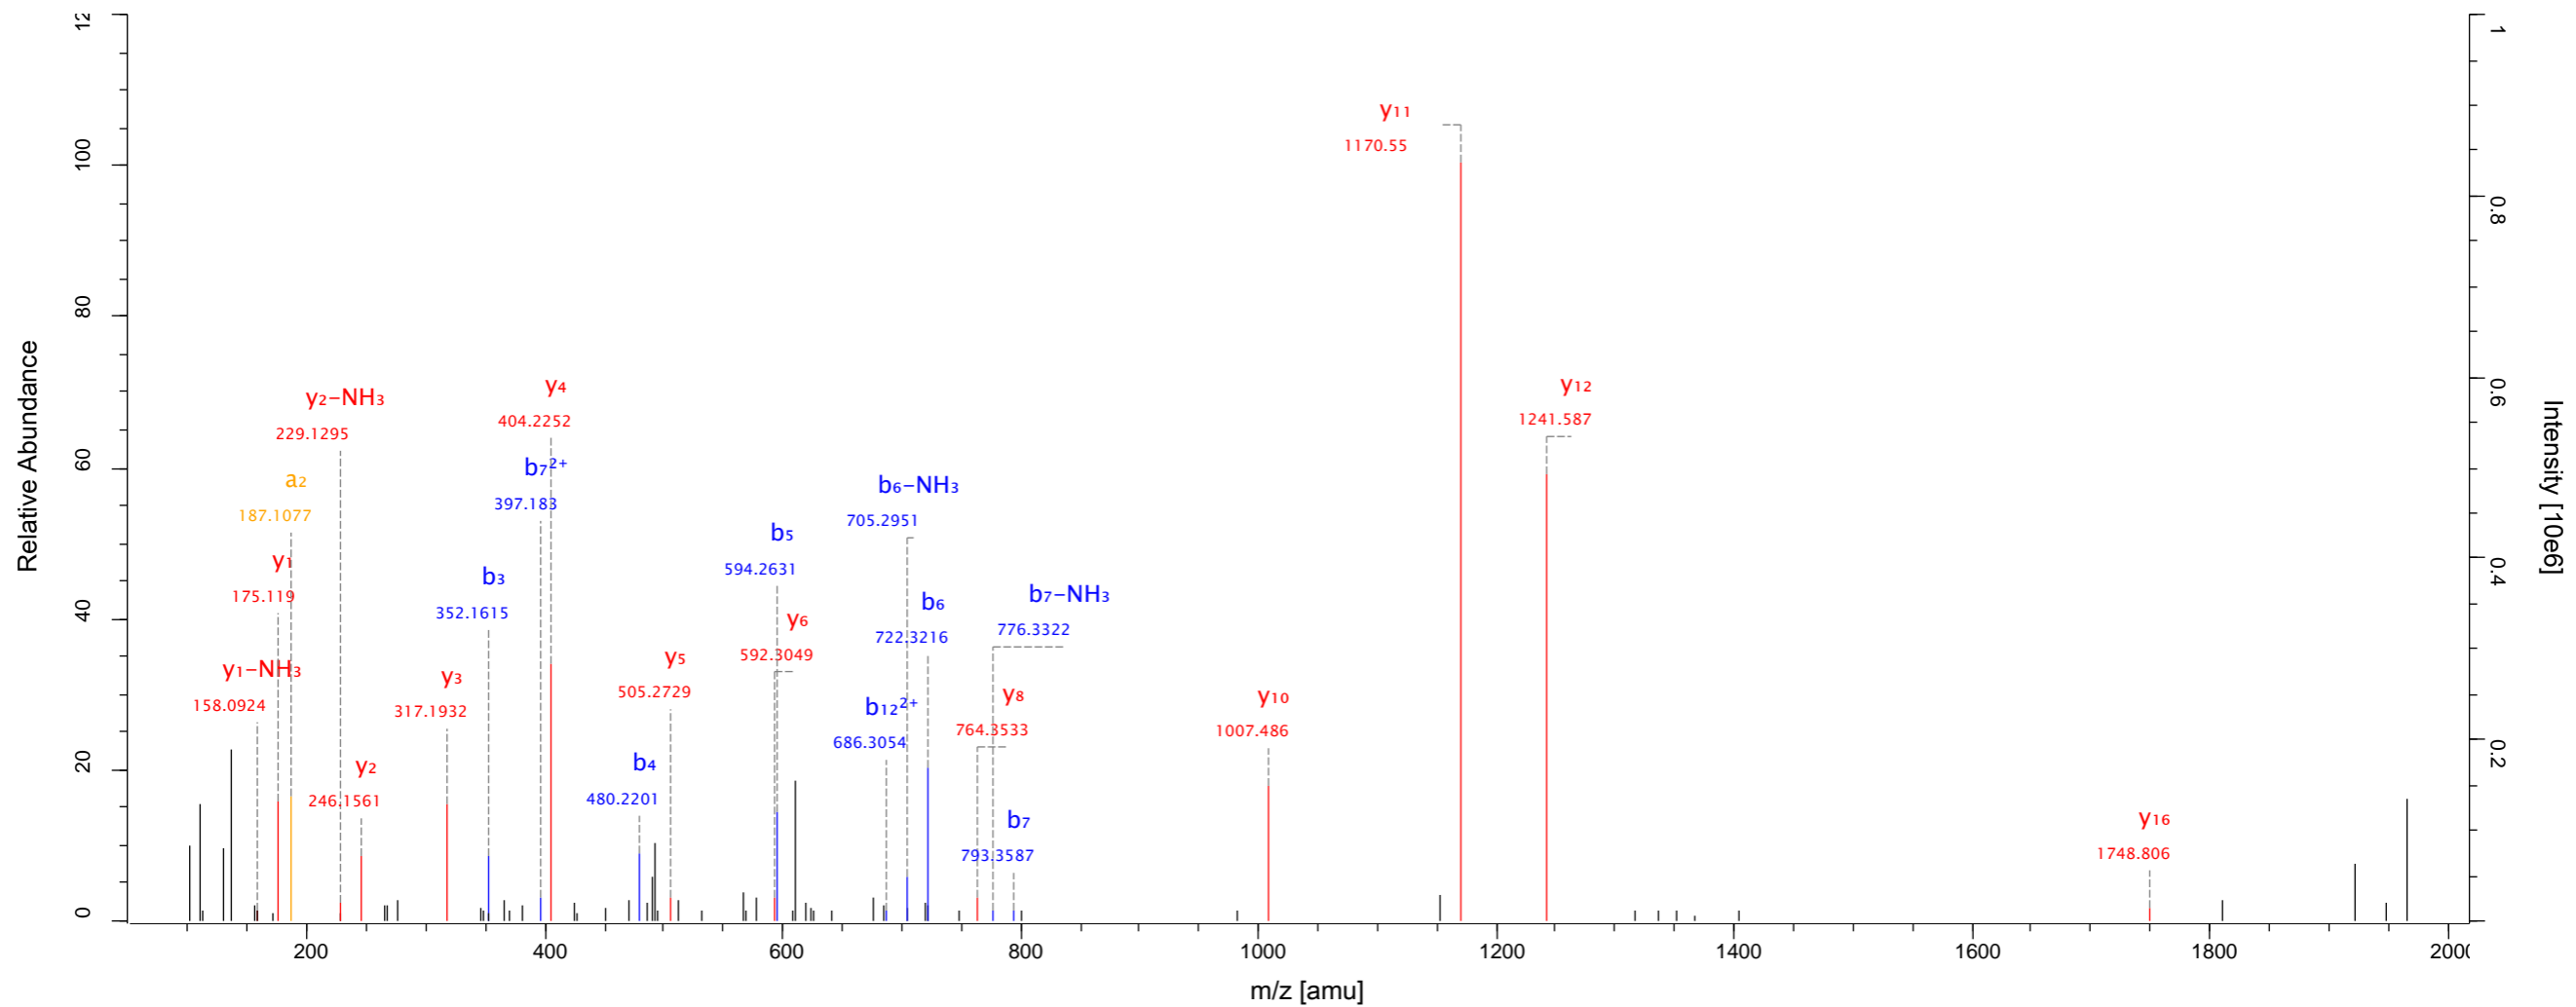

Raw file: 20111212\_EXQ5\_AnMi\_QC\_HCMVp1\_39  
Scan number: 7226  
Protein: ORFL147C - NC\_006273.2[85932,87362]- <unknown description>  
Peptide score: 151.9  
Method: FTMS; HCD

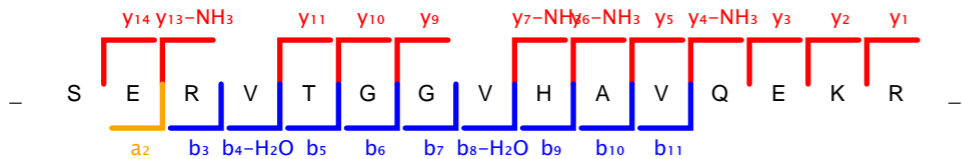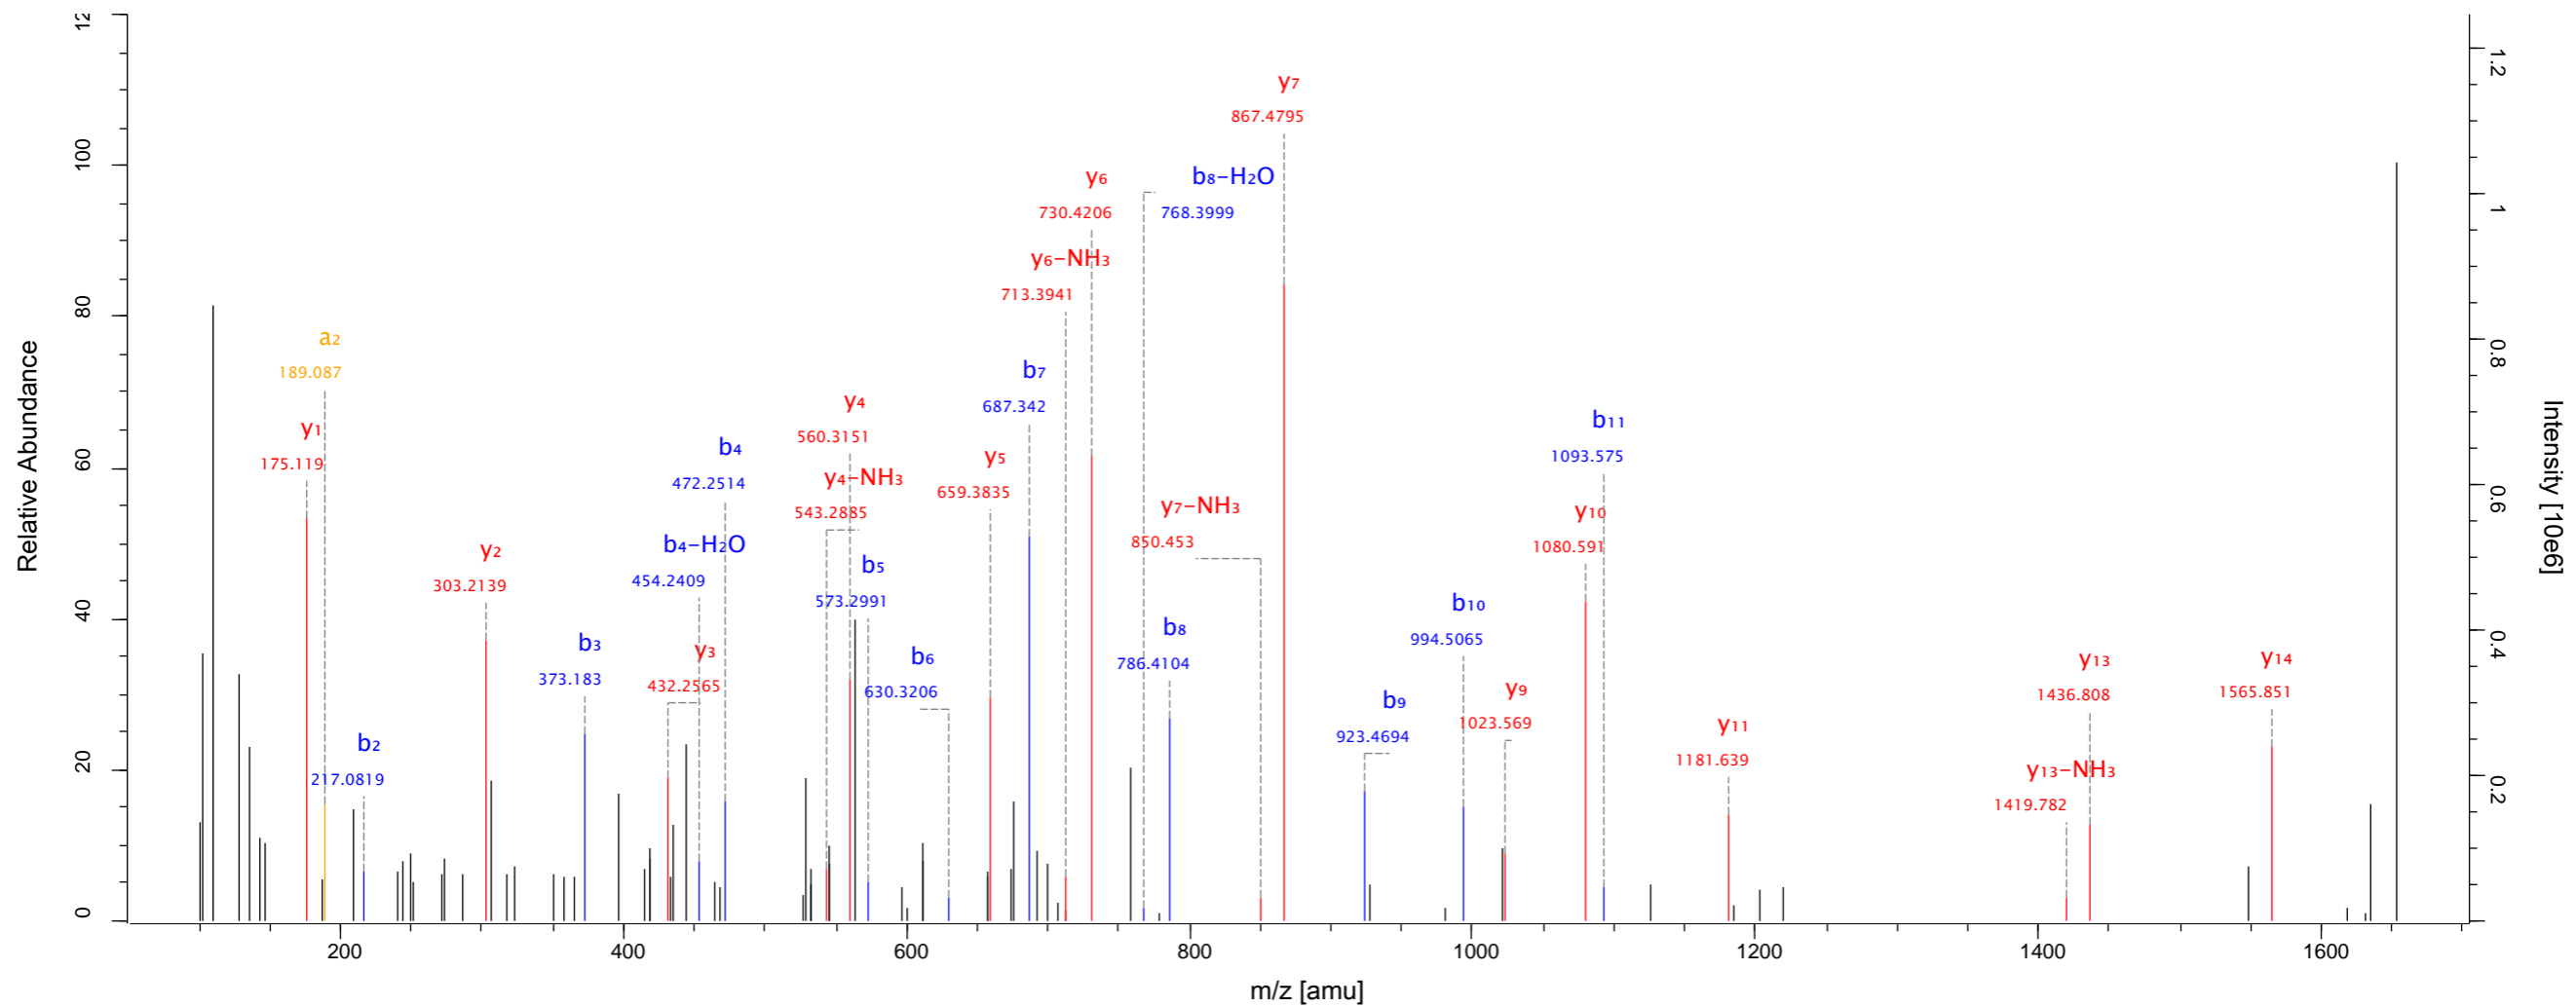

Raw file: 20111212\_EXQ5\_AnMi\_QC\_HCMVp1\_40  
 Scan number: 8377  
 Protein: ORFL147C - NC\_006273.2[85932,87362]- <unknown description>  
 Peptide score: 150.49  
 Method: FTMS; HCD

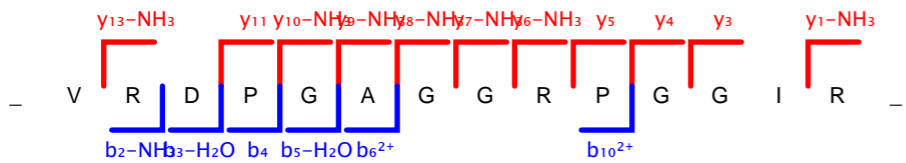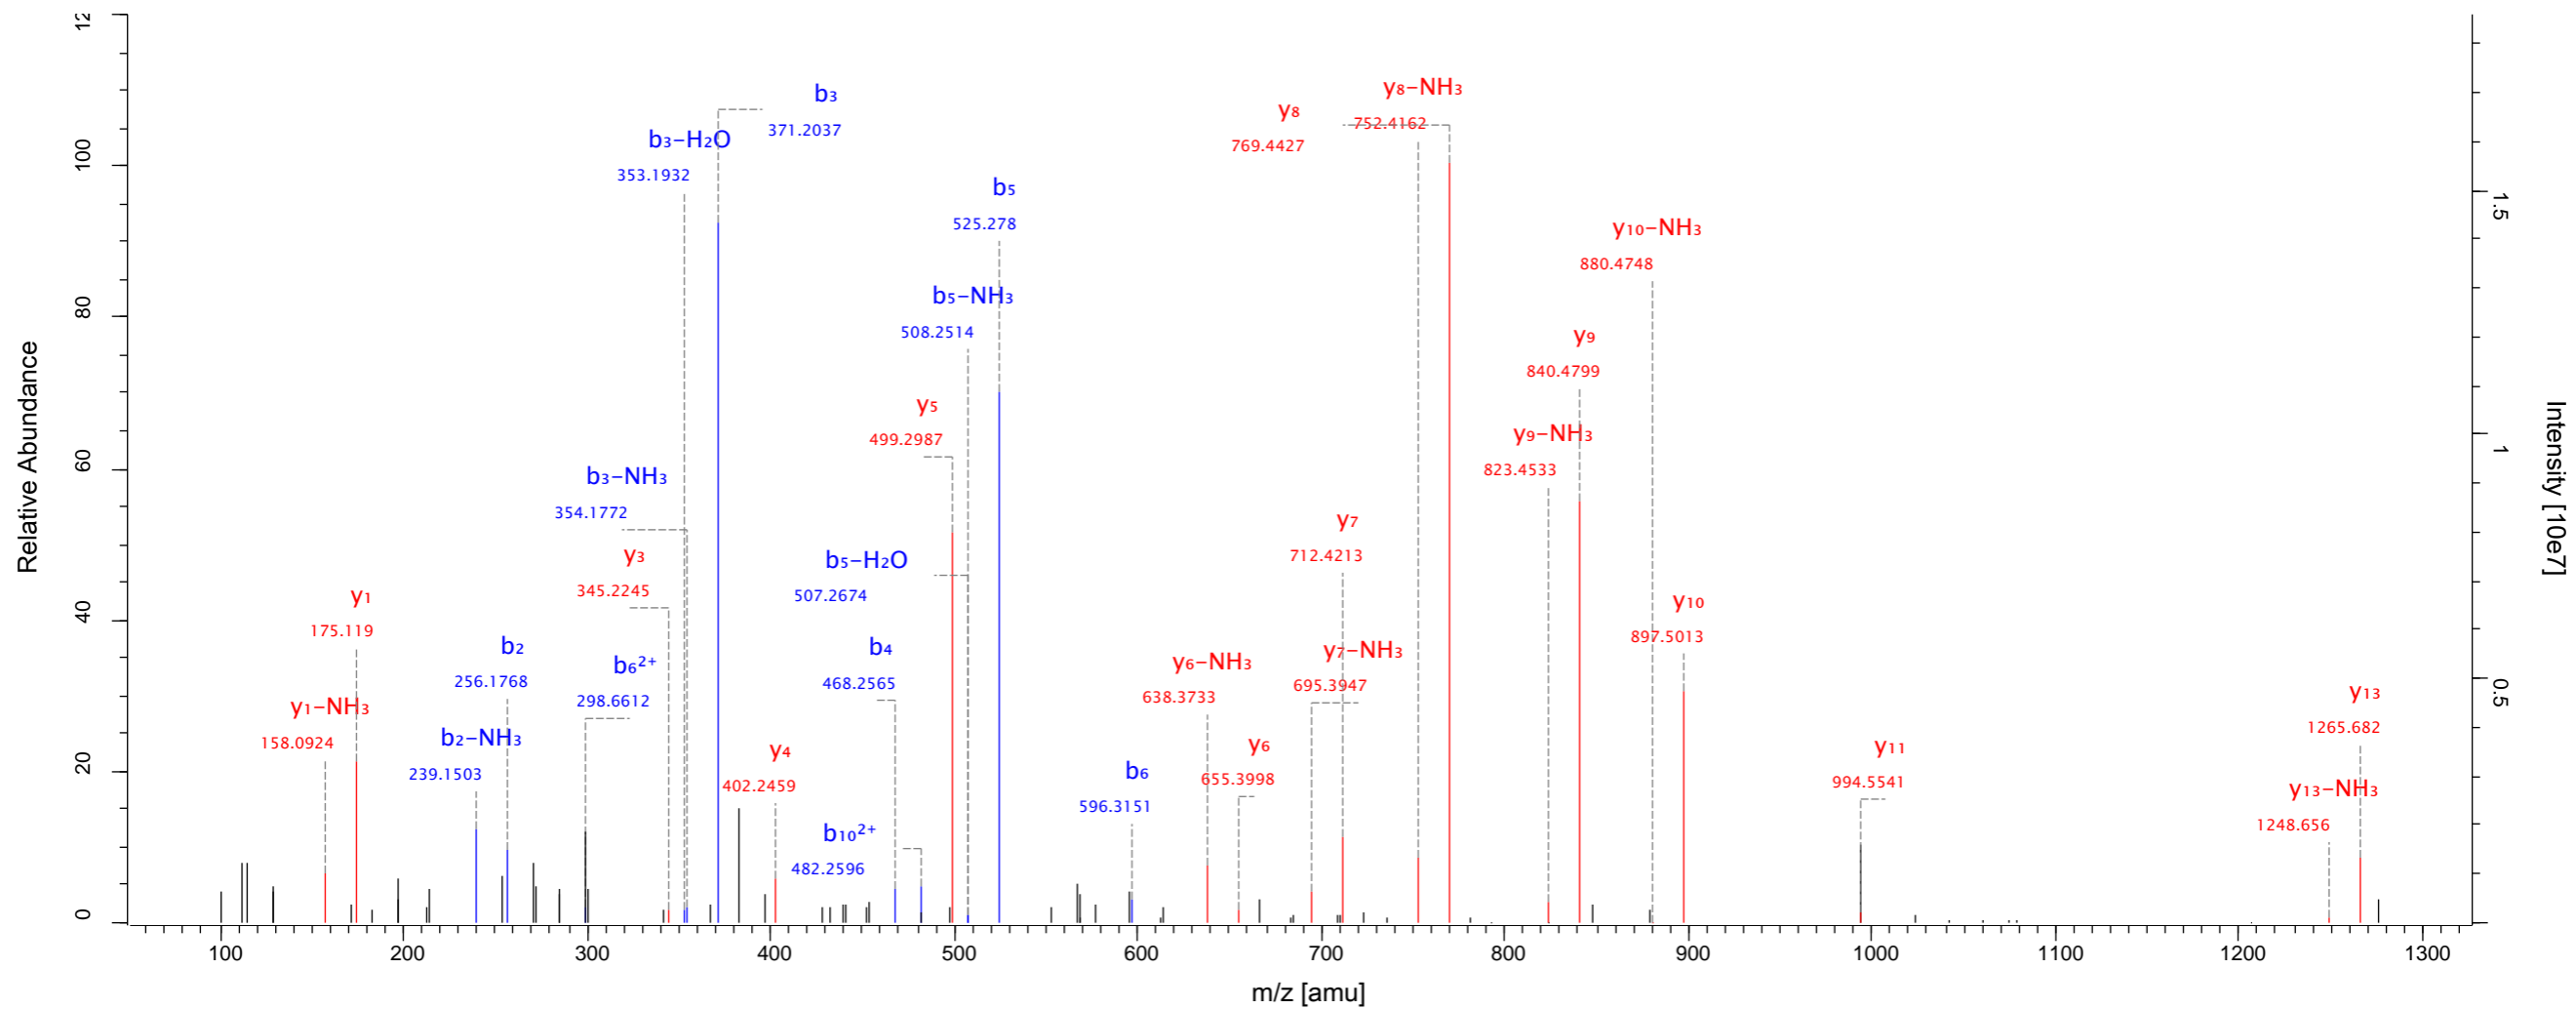

Raw file: 20111212\_EXQ5\_AnMi\_QC\_HCMVp11\_27  
Scan number: 17385  
Protein: ORFL149C.iORF2 - NC\_006273.2[91004,91471]- <unknown description>  
Peptide score: 124.08  
Method: FTMS; HCD

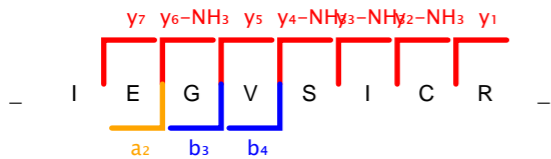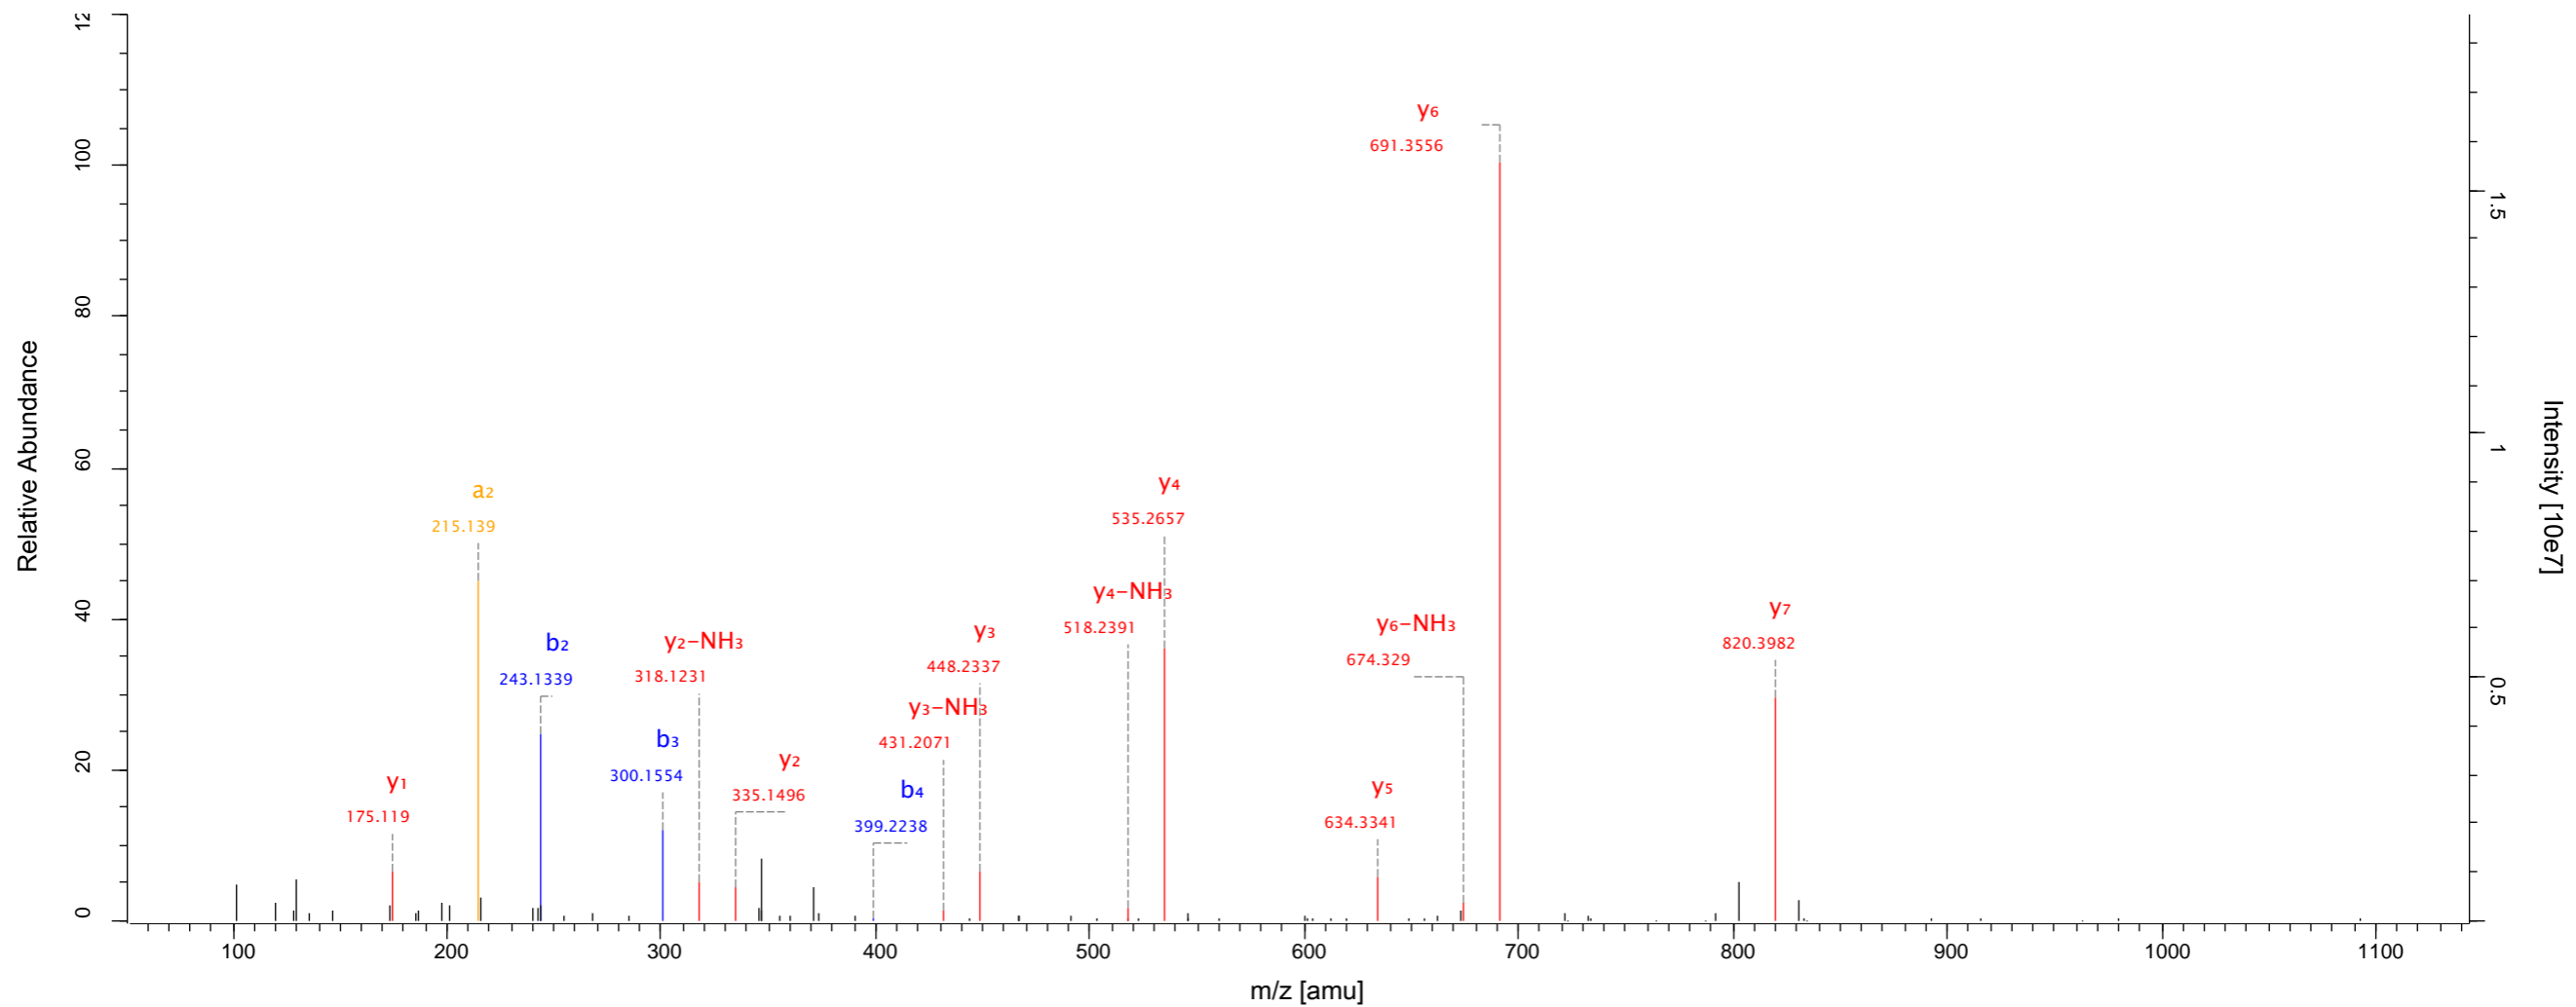

Raw file: 20111212\_EXQ5\_AnMi\_QC\_HCMVp11\_27  
Scan number: 32768  
Protein: ORFL149C.iORF2 - NC\_006273.2[91004,91471]- <unknown description>  
Peptide score: 81.16  
Method: FTMS; HCD

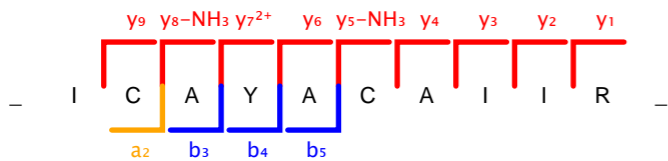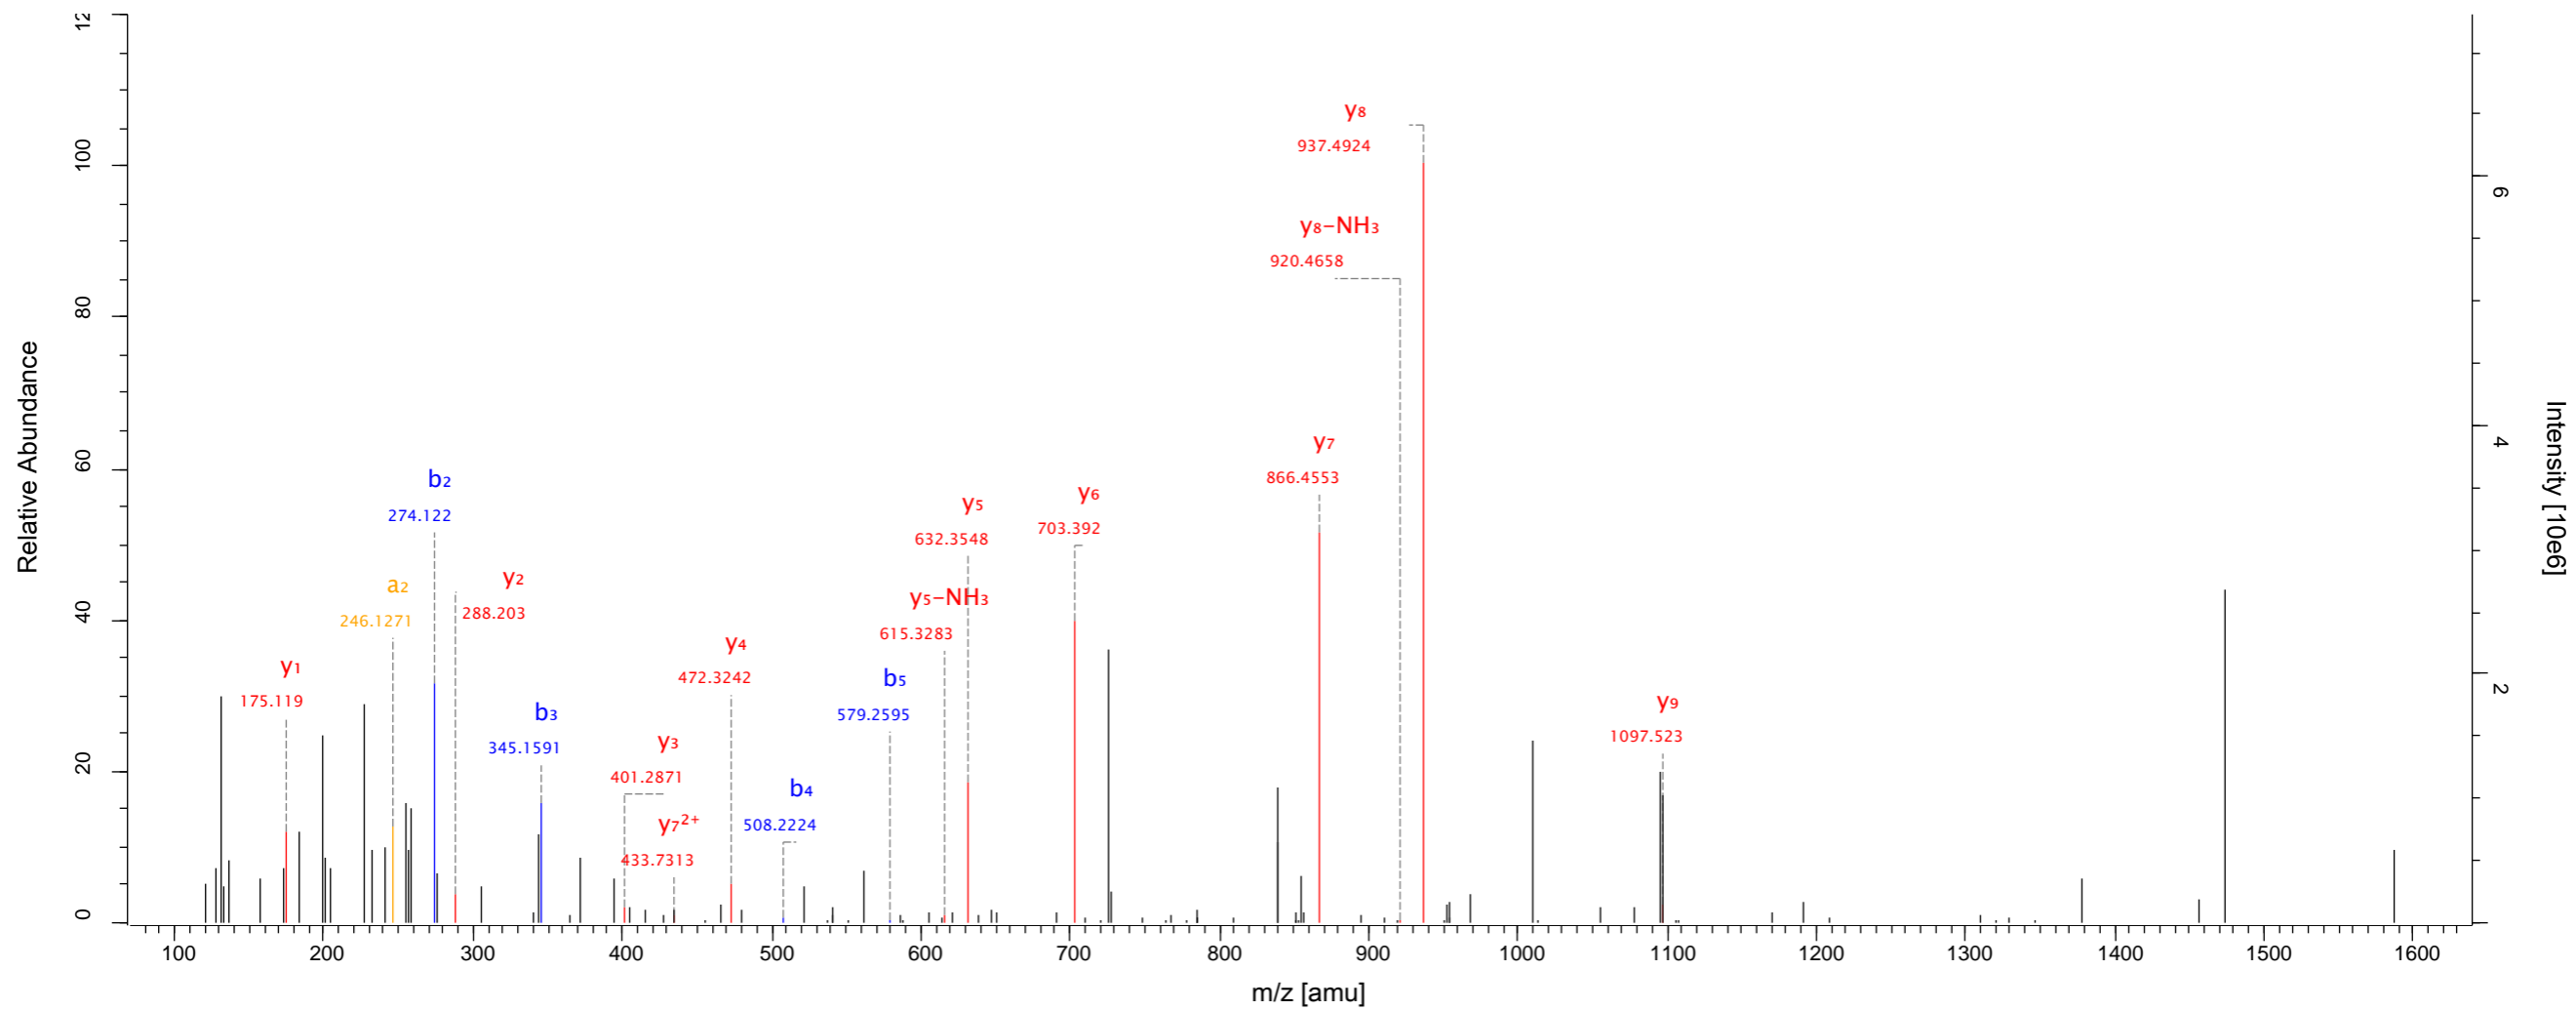

Raw file: 20111212\_EXQ5\_AnMi\_QC\_HCMVp11\_27  
Scan number: 5509  
Protein: ORFL149C.iORF2 - NC\_006273.2[91004,91471]- <unknown description>  
Peptide score: 63.73  
Method: FTMS; HCD

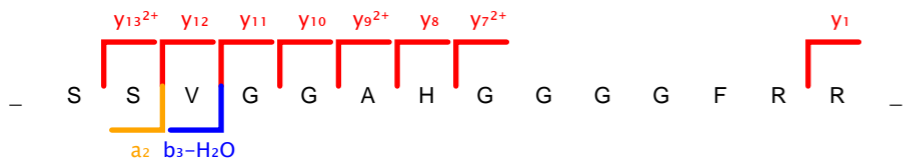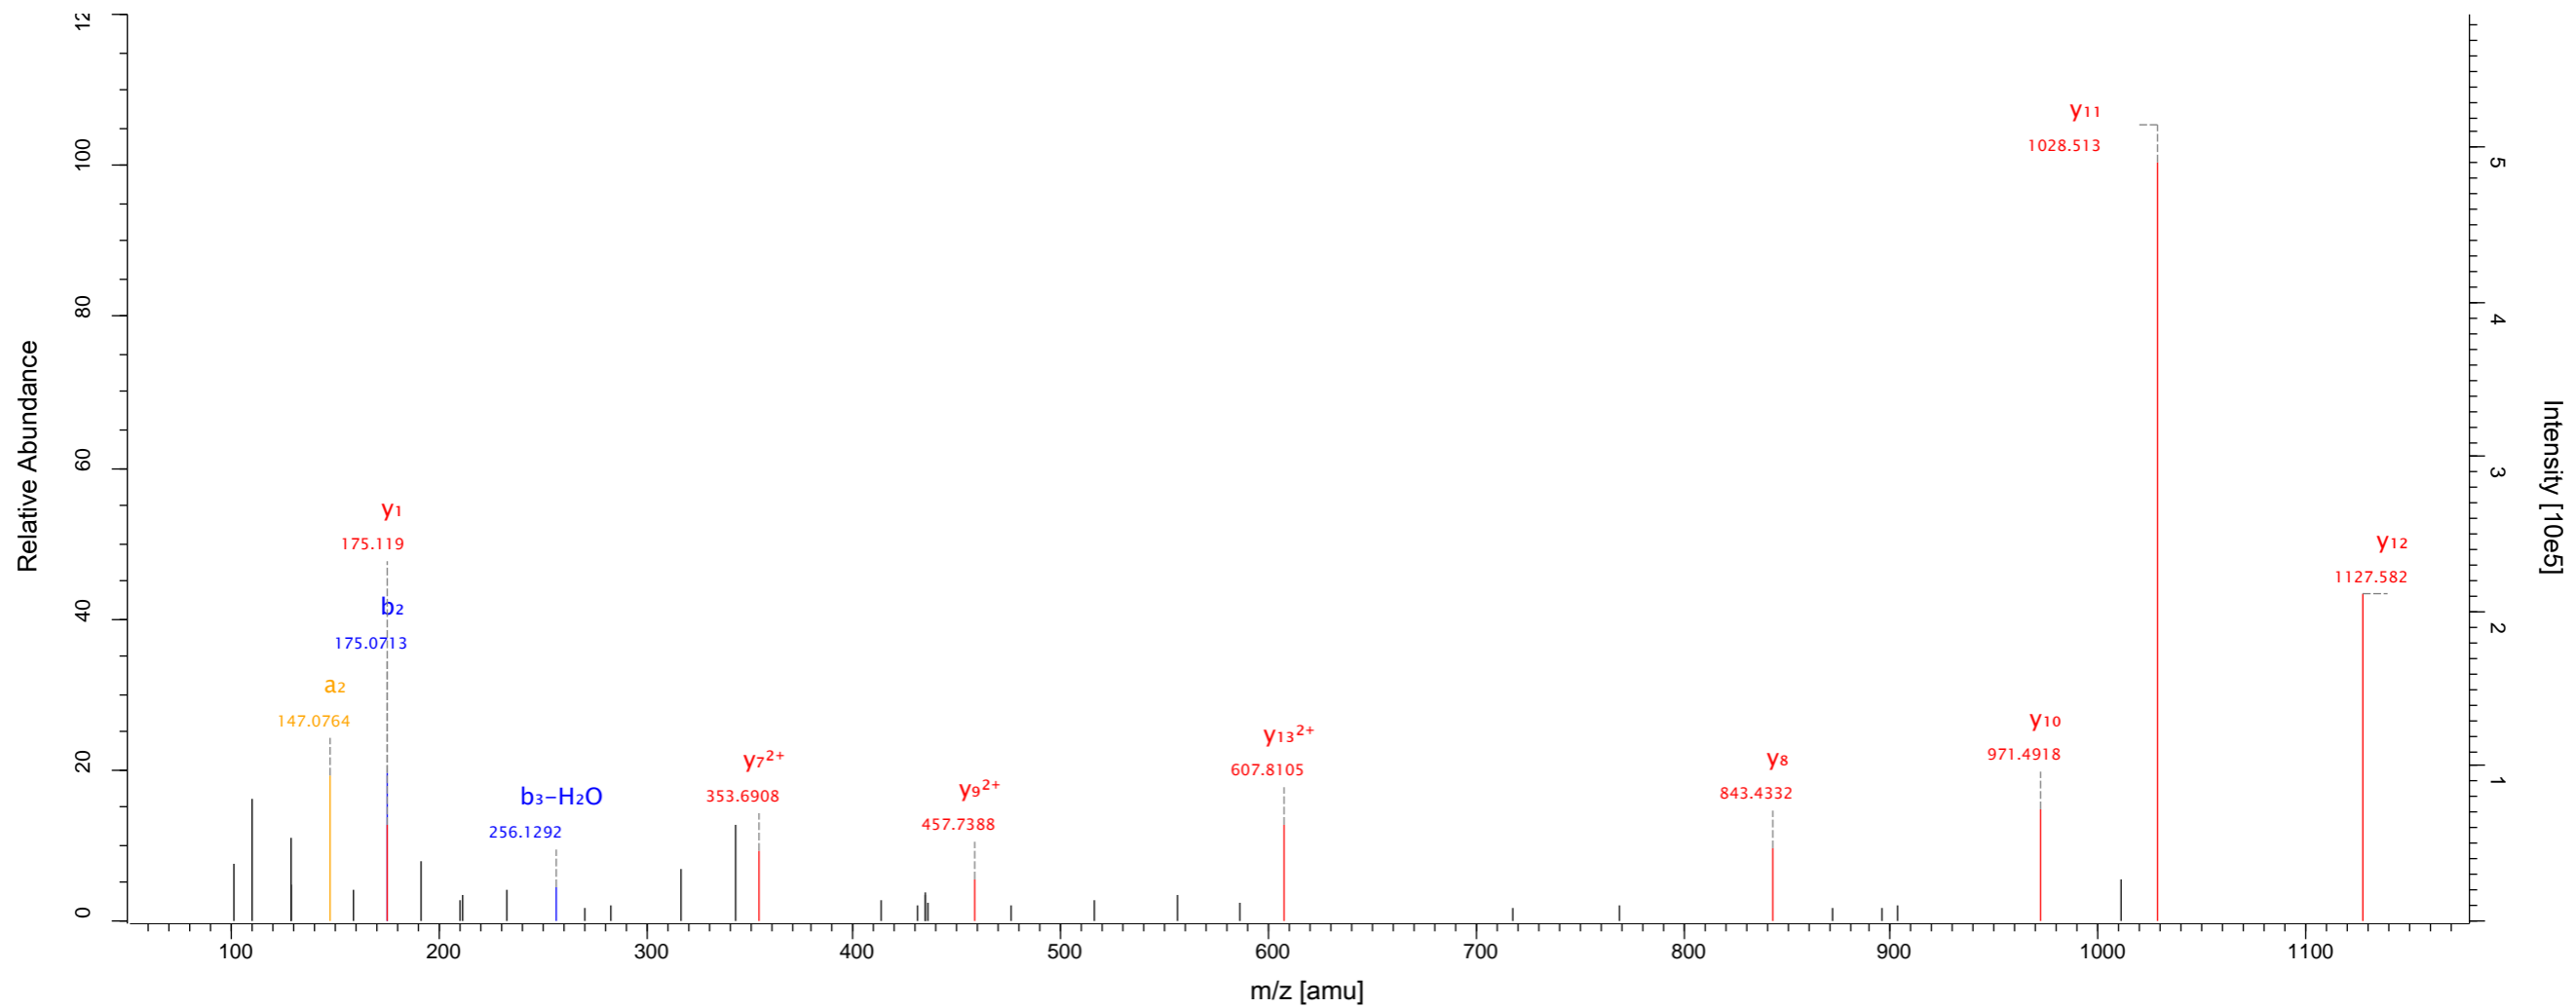

Raw file: 20111212\_EXQ5\_AnMi\_QC\_HCMVp1\_27  
Scan number: 6344  
Protein: ORFL149C.iORF2 - NC\_006273.2[91004,91471]- <unknown description>  
Peptide score: 72.96  
Method: FTMS; HCD

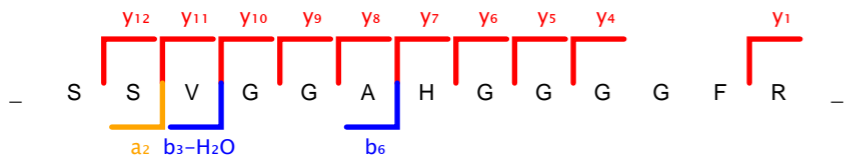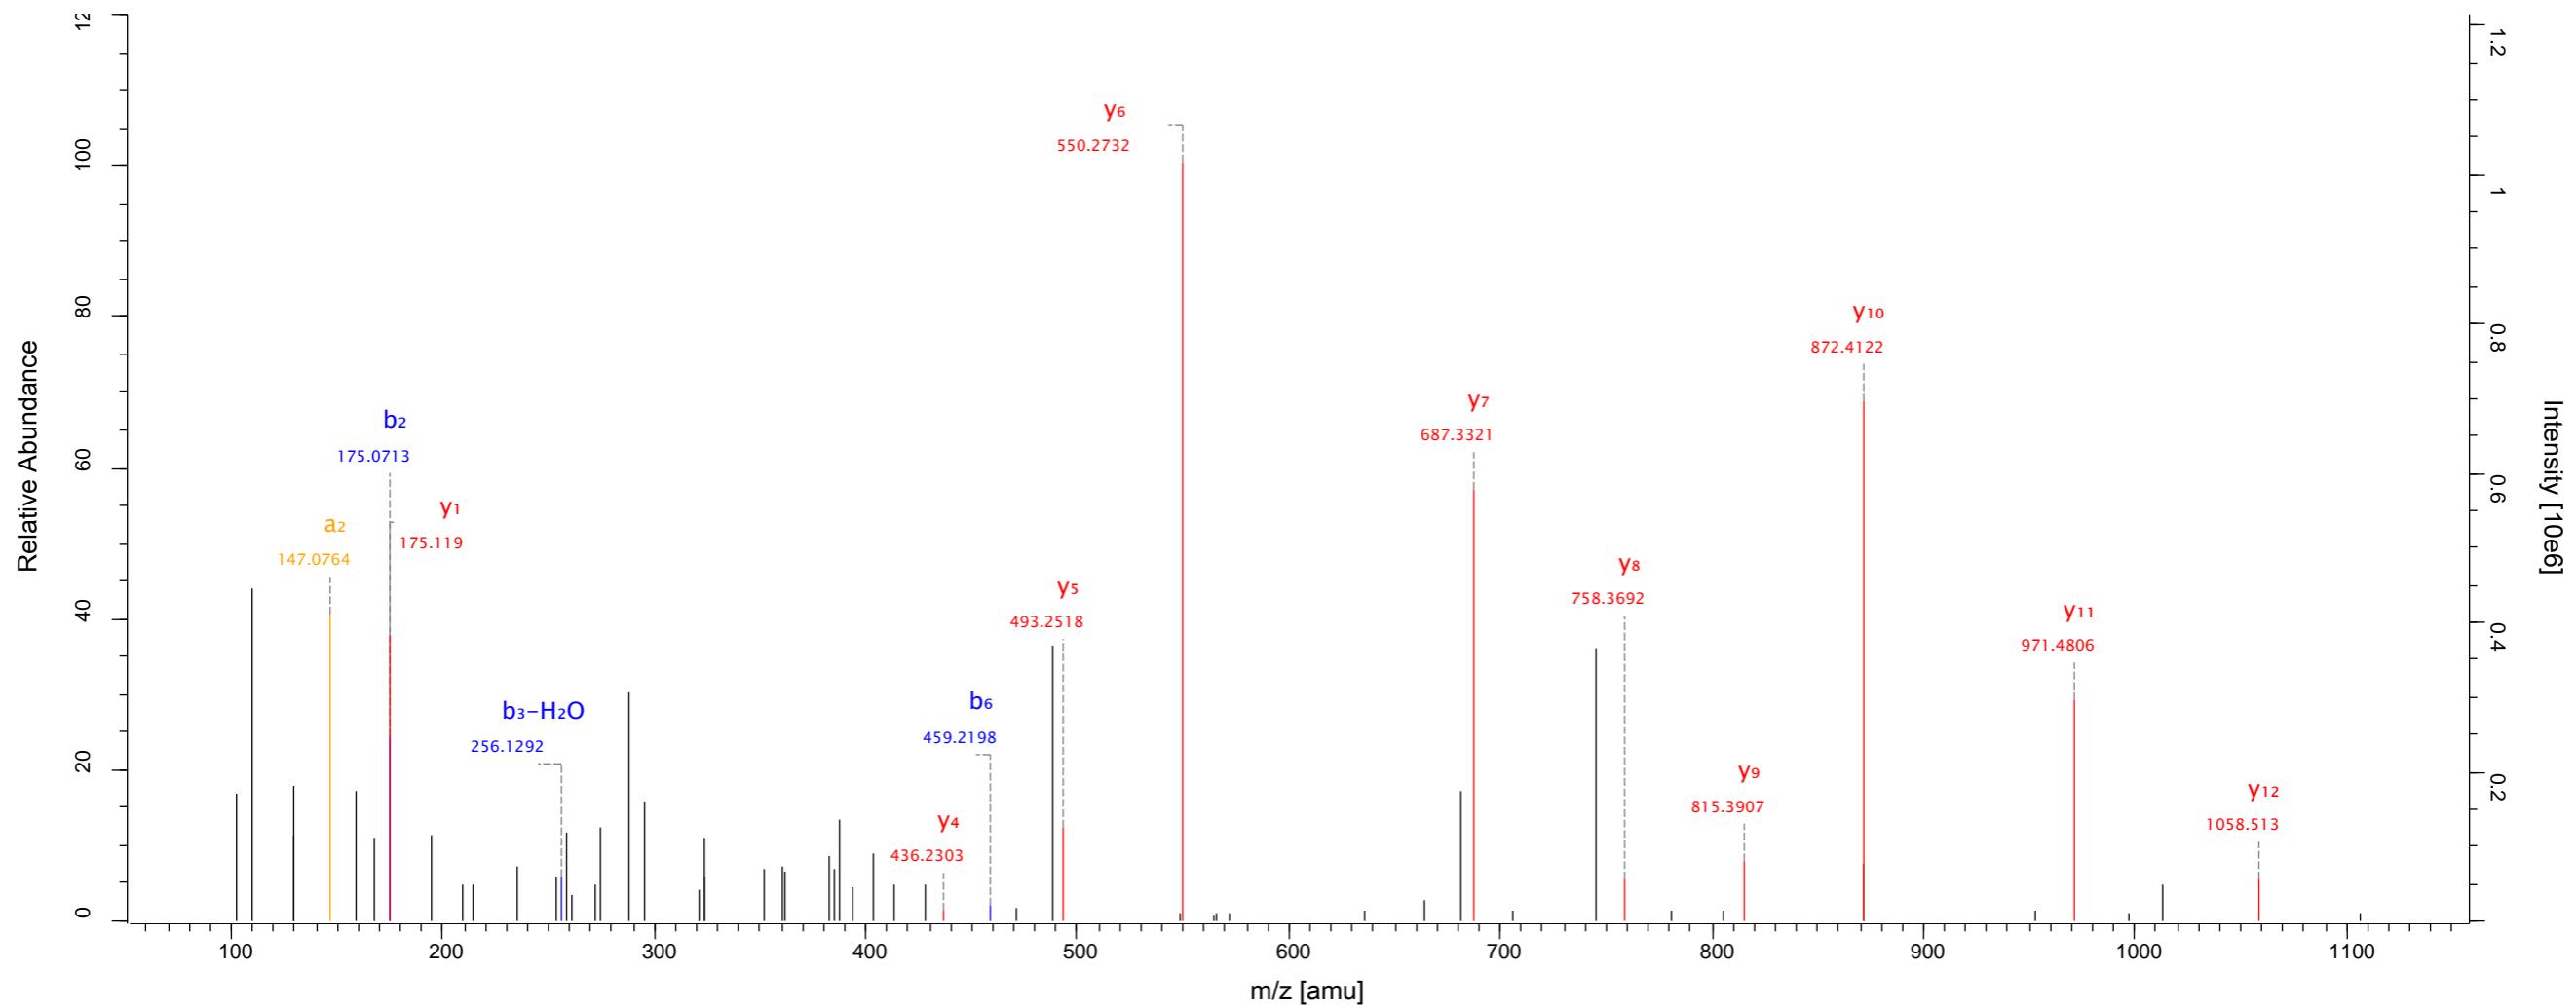



Raw file: 20111212\_EXQ5\_AnMi\_QC\_HCMVp1\_35  
Scan number: 15524  
Protein: ORFL149C.iORF2 - NC\_006273.2[91004,91471]- <unknown description>  
Peptide score: 104.17  
Method: FTMS; HCD

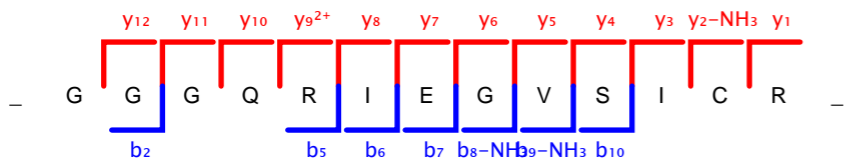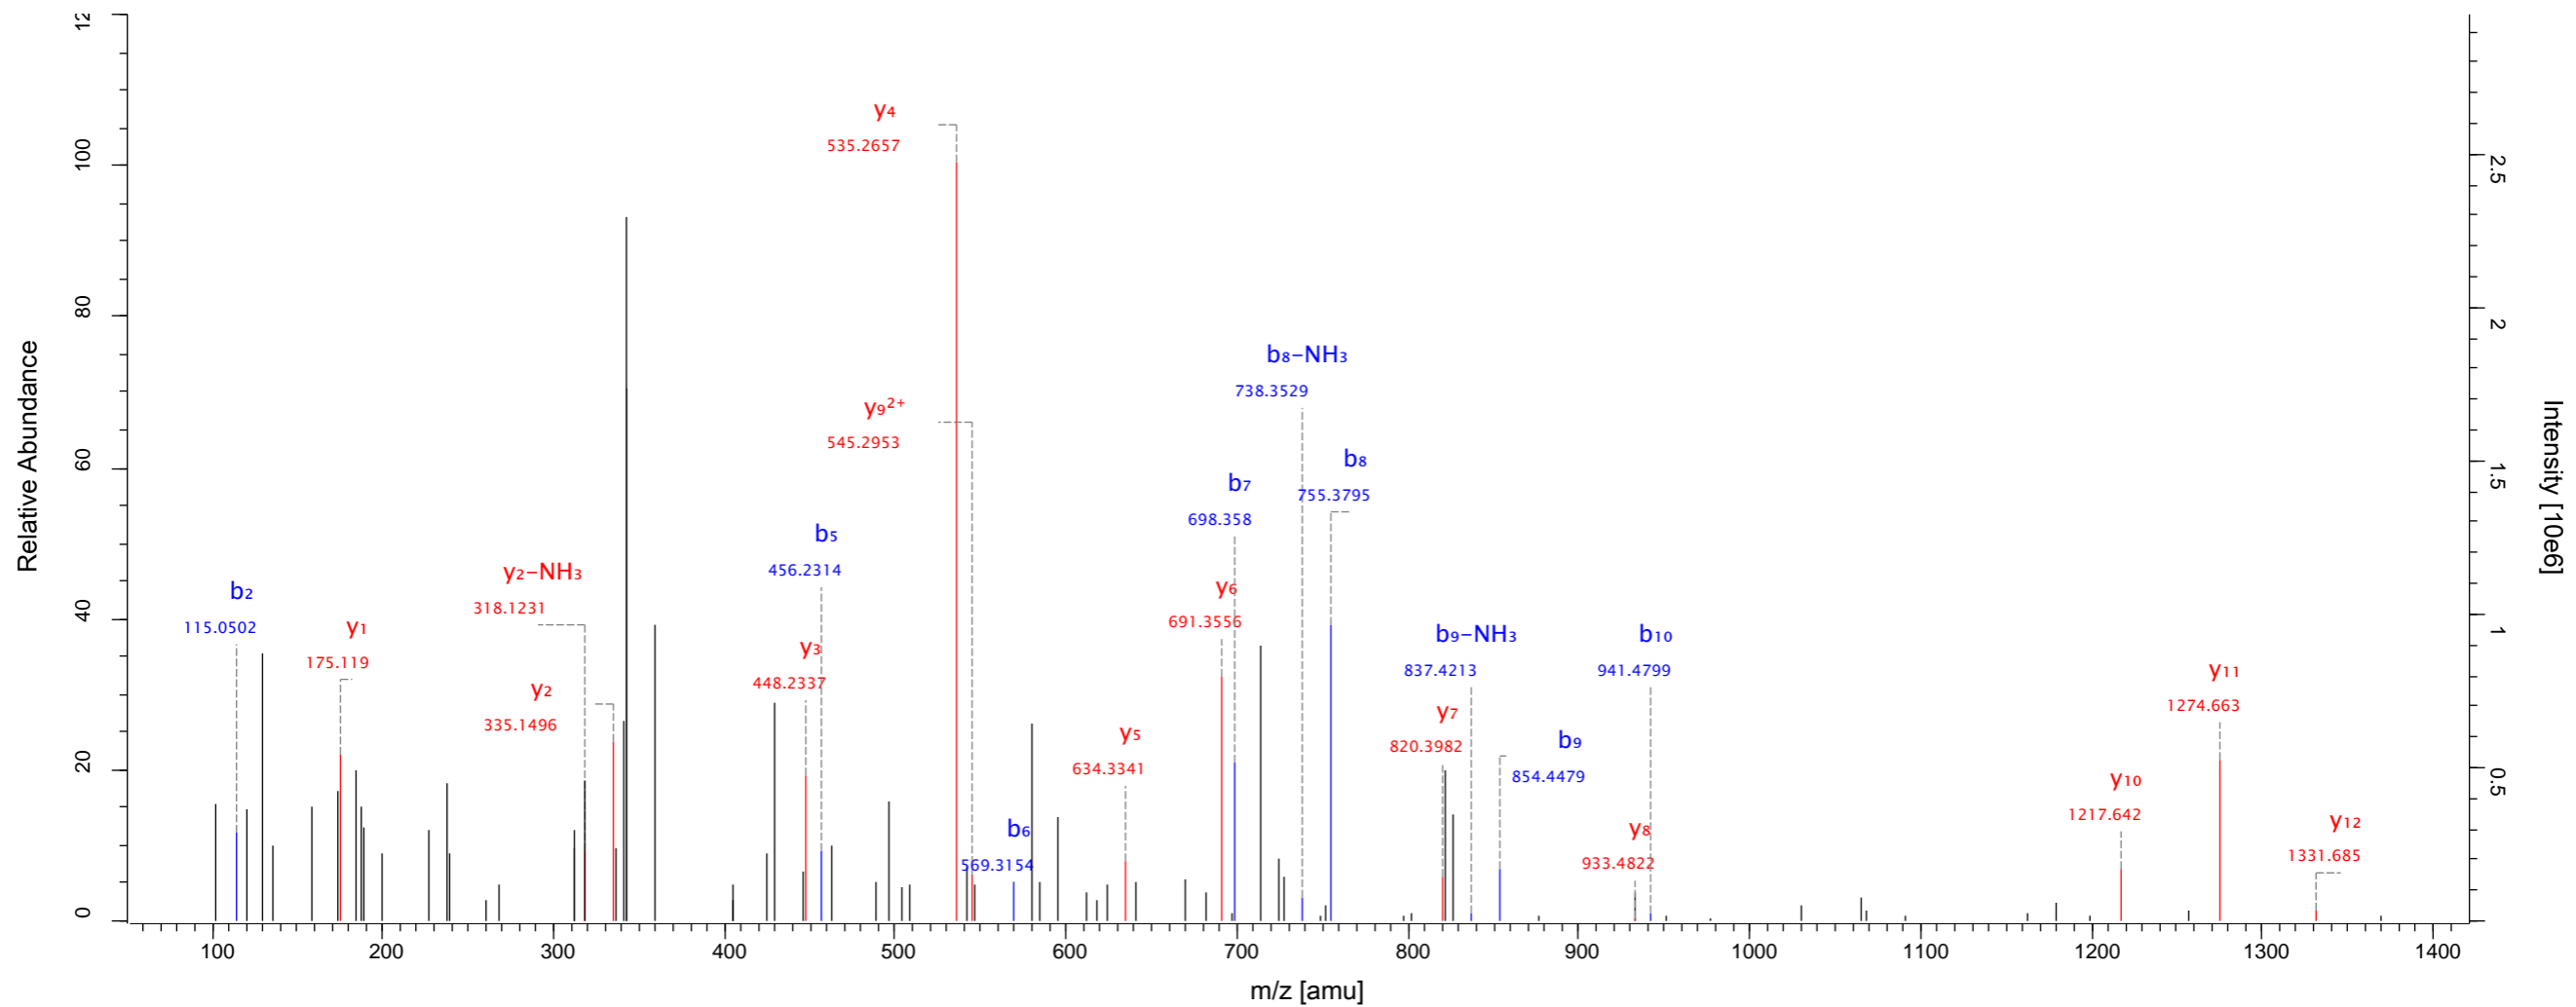

Raw file: 20111212\_EXQ5\_AnMi\_QC\_HCMVp1\_35  
Scan number: 33235  
Protein: ORFL149C.iORF2 - NC\_006273.2[91004,91471]- <unknown description>  
Peptide score: 109.88  
Method: FTMS; HCD

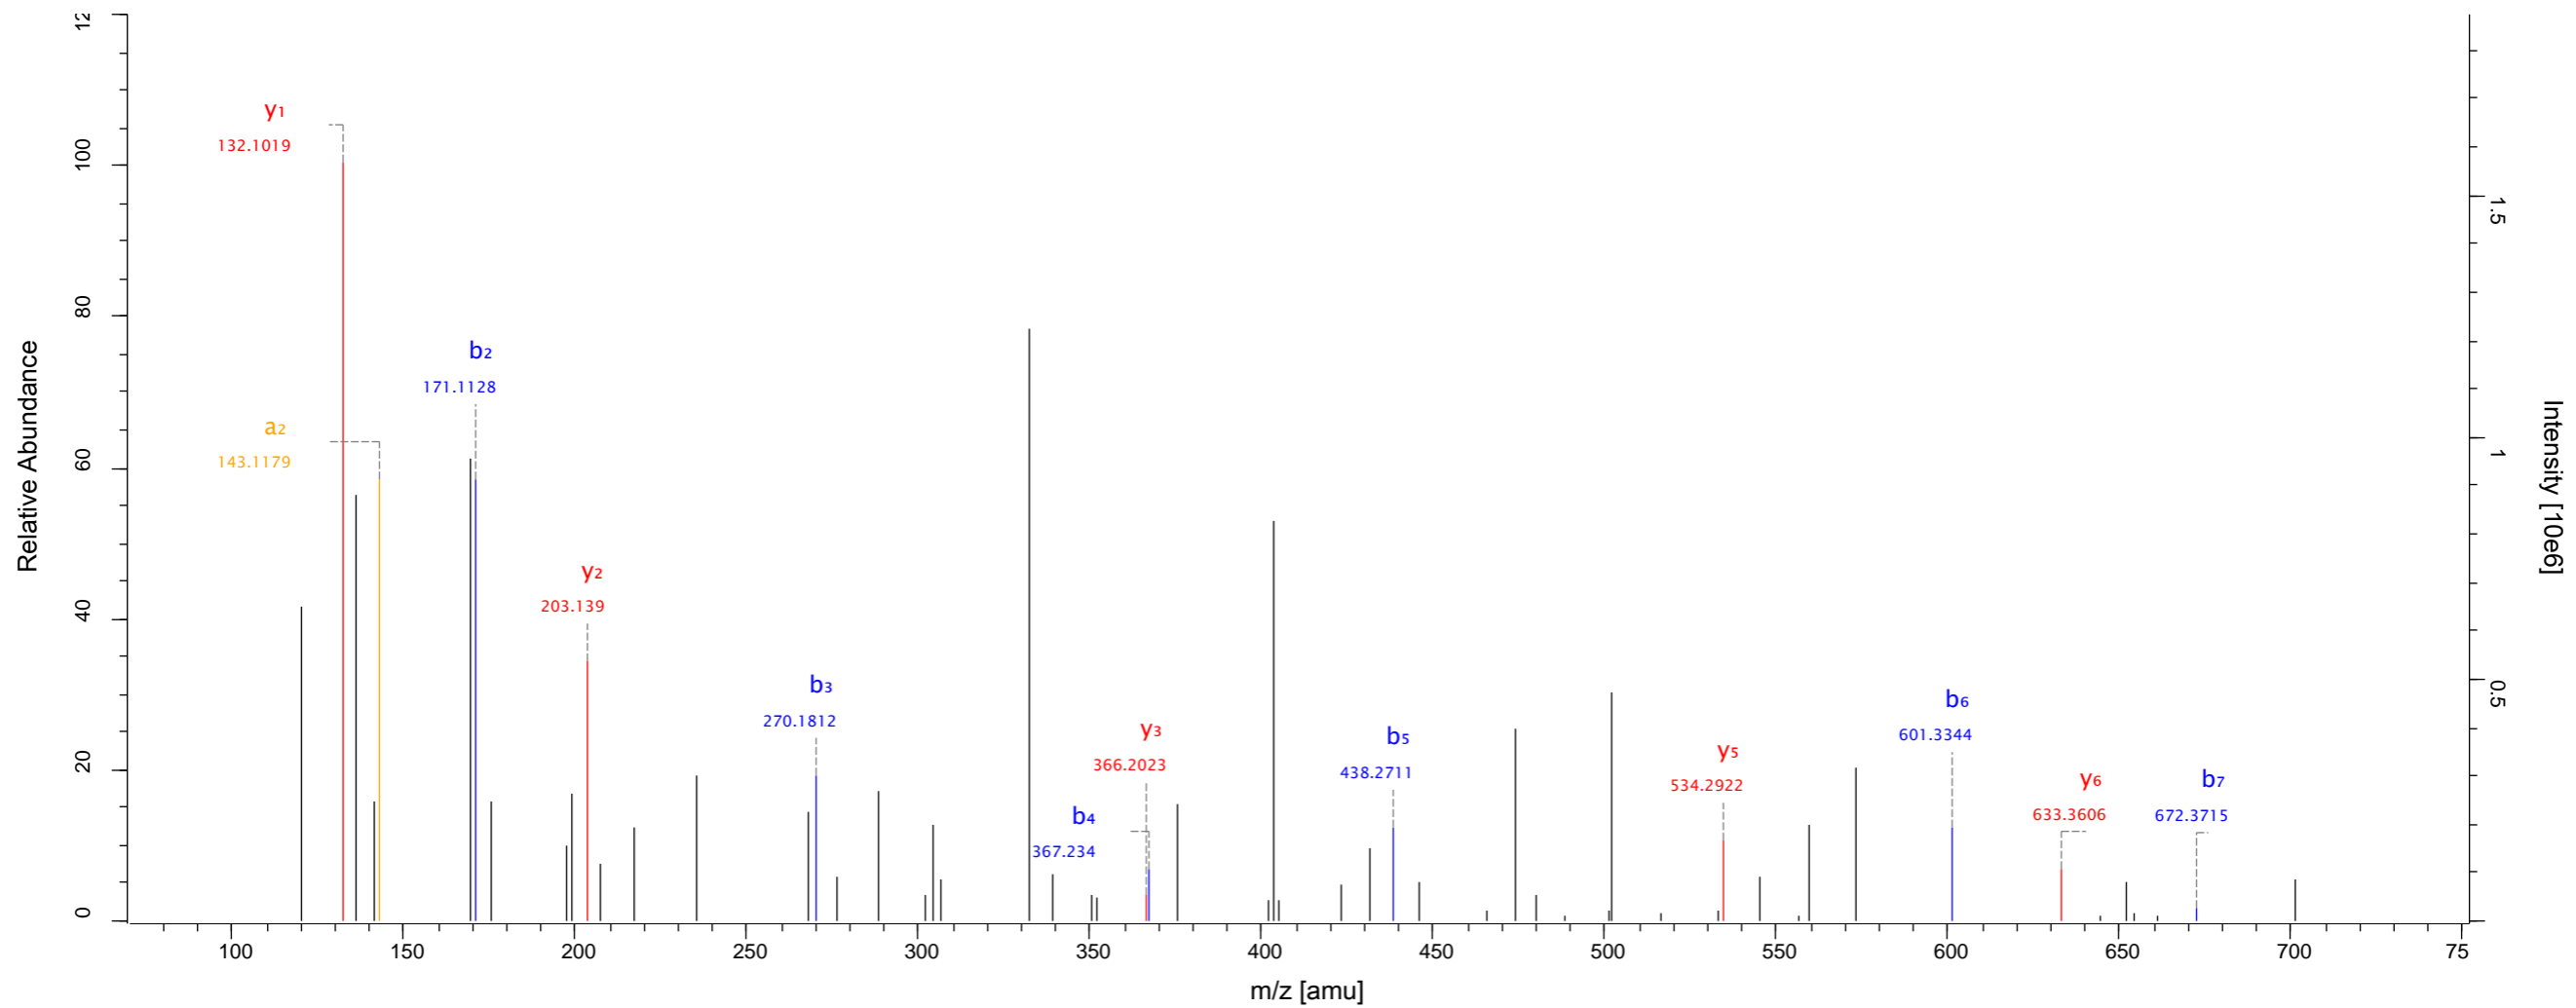

Raw file: 20111212\_EXQ5\_AnMi\_QC\_HCMVp11\_35  
Scan number: 8220  
Protein: ORFL149C.iORF2 - NC\_006273.2[91004,91471]- <unknown description>  
Peptide score: 103.43  
Method: FTMS; HCD

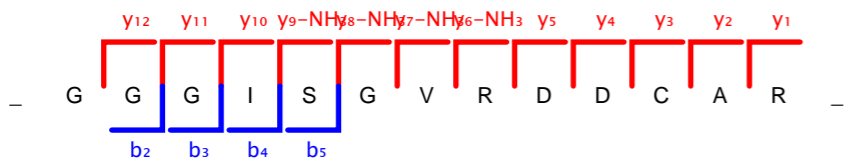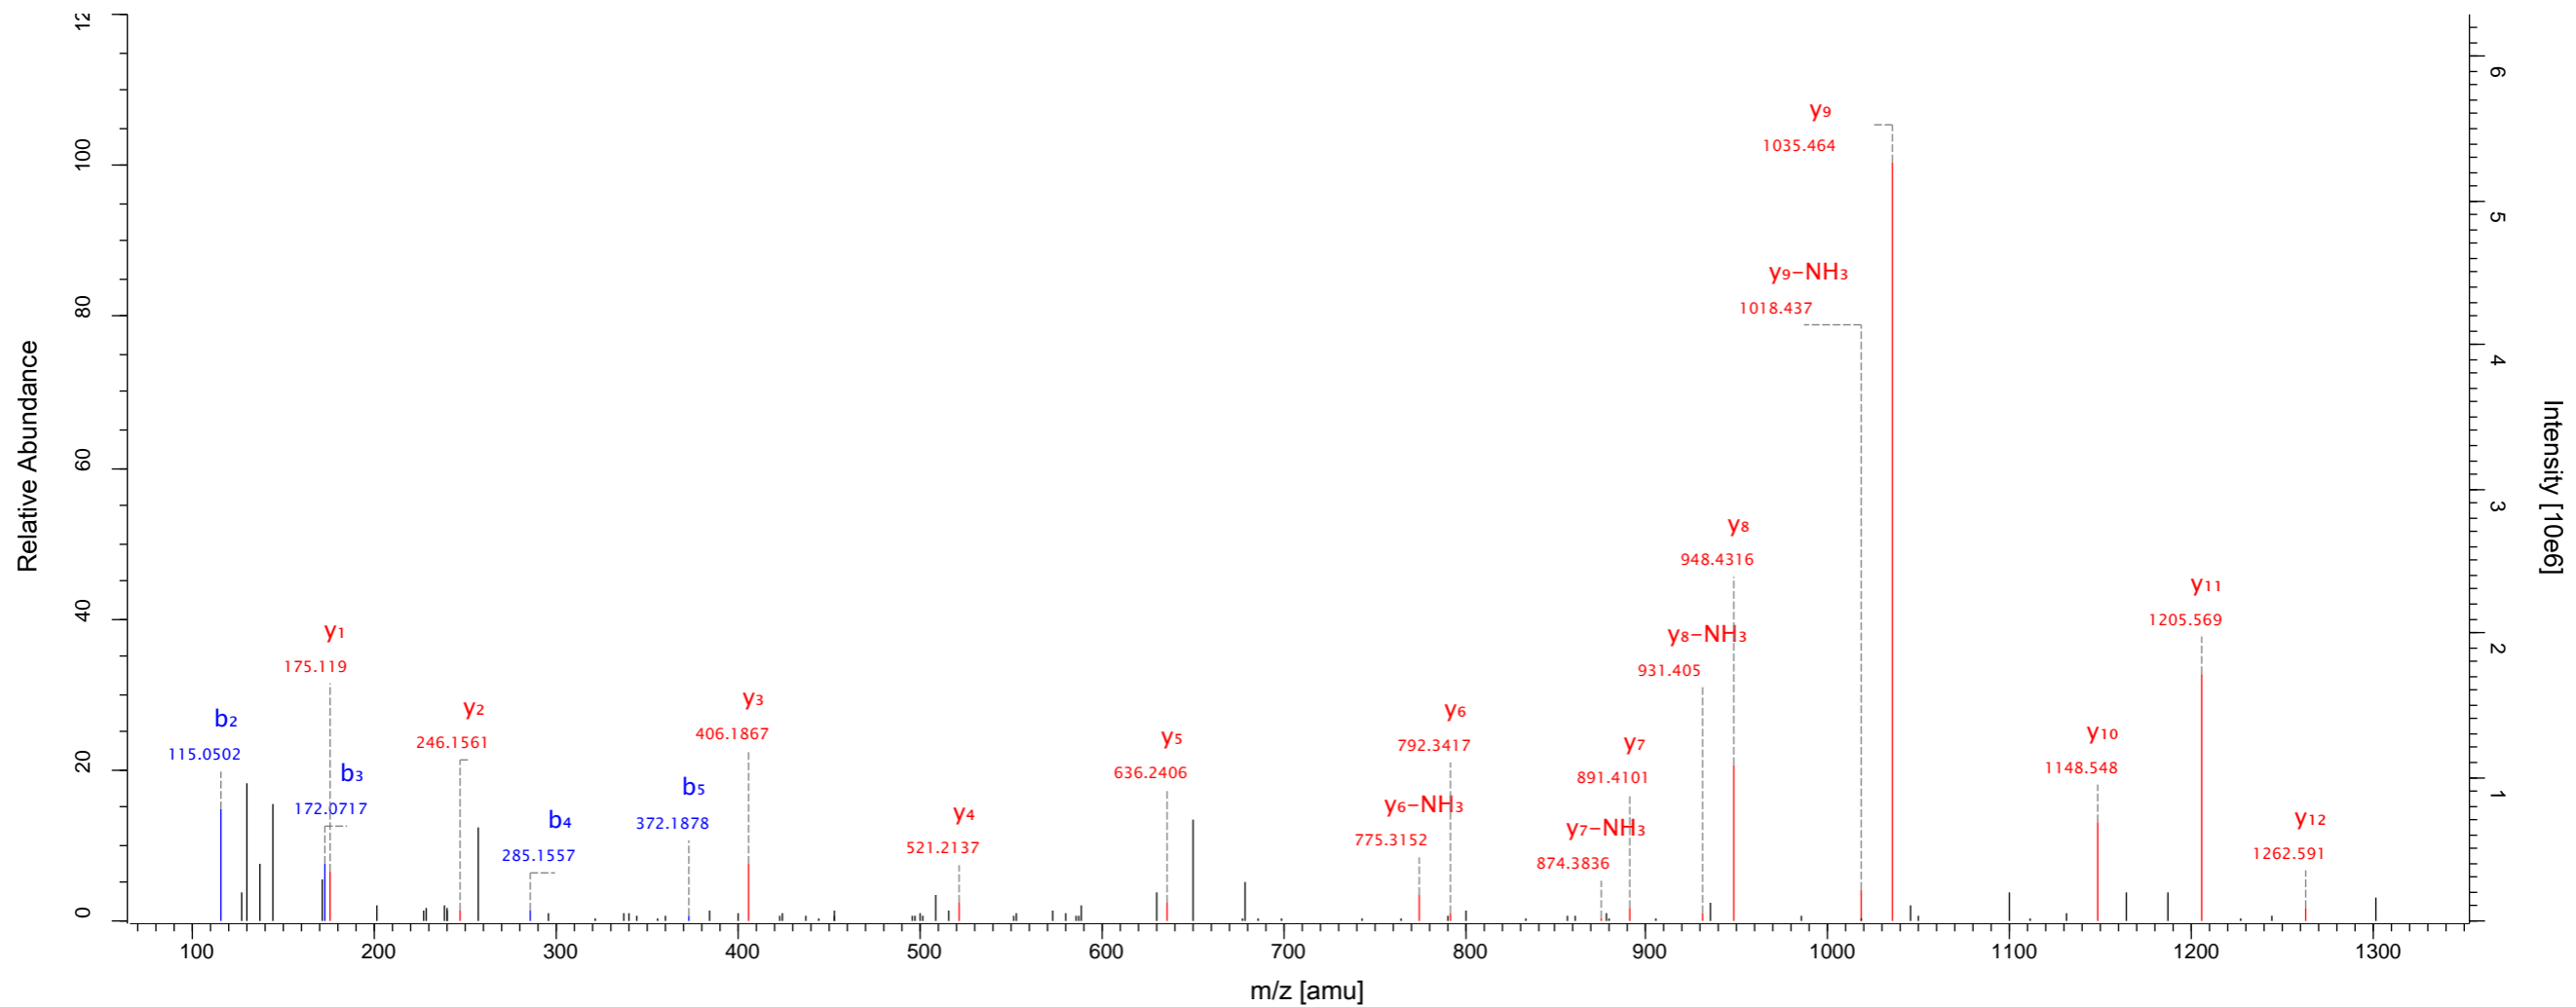

Supplement: NIHMS522924-supplement-Supp_File_3.pdf [file NIHMS522924-supplement-Supp_File_3.pdf]
